# Supplementary material for: PIM kinase control of CD8 T cell protein synthesis and cell trafficking
Source: eLife journal article supplement (doi:10.7554/elife.98622), 2024-07-24
Supplement: fig2-data1 [file elife-98622-fig2-data1-v1.zip]

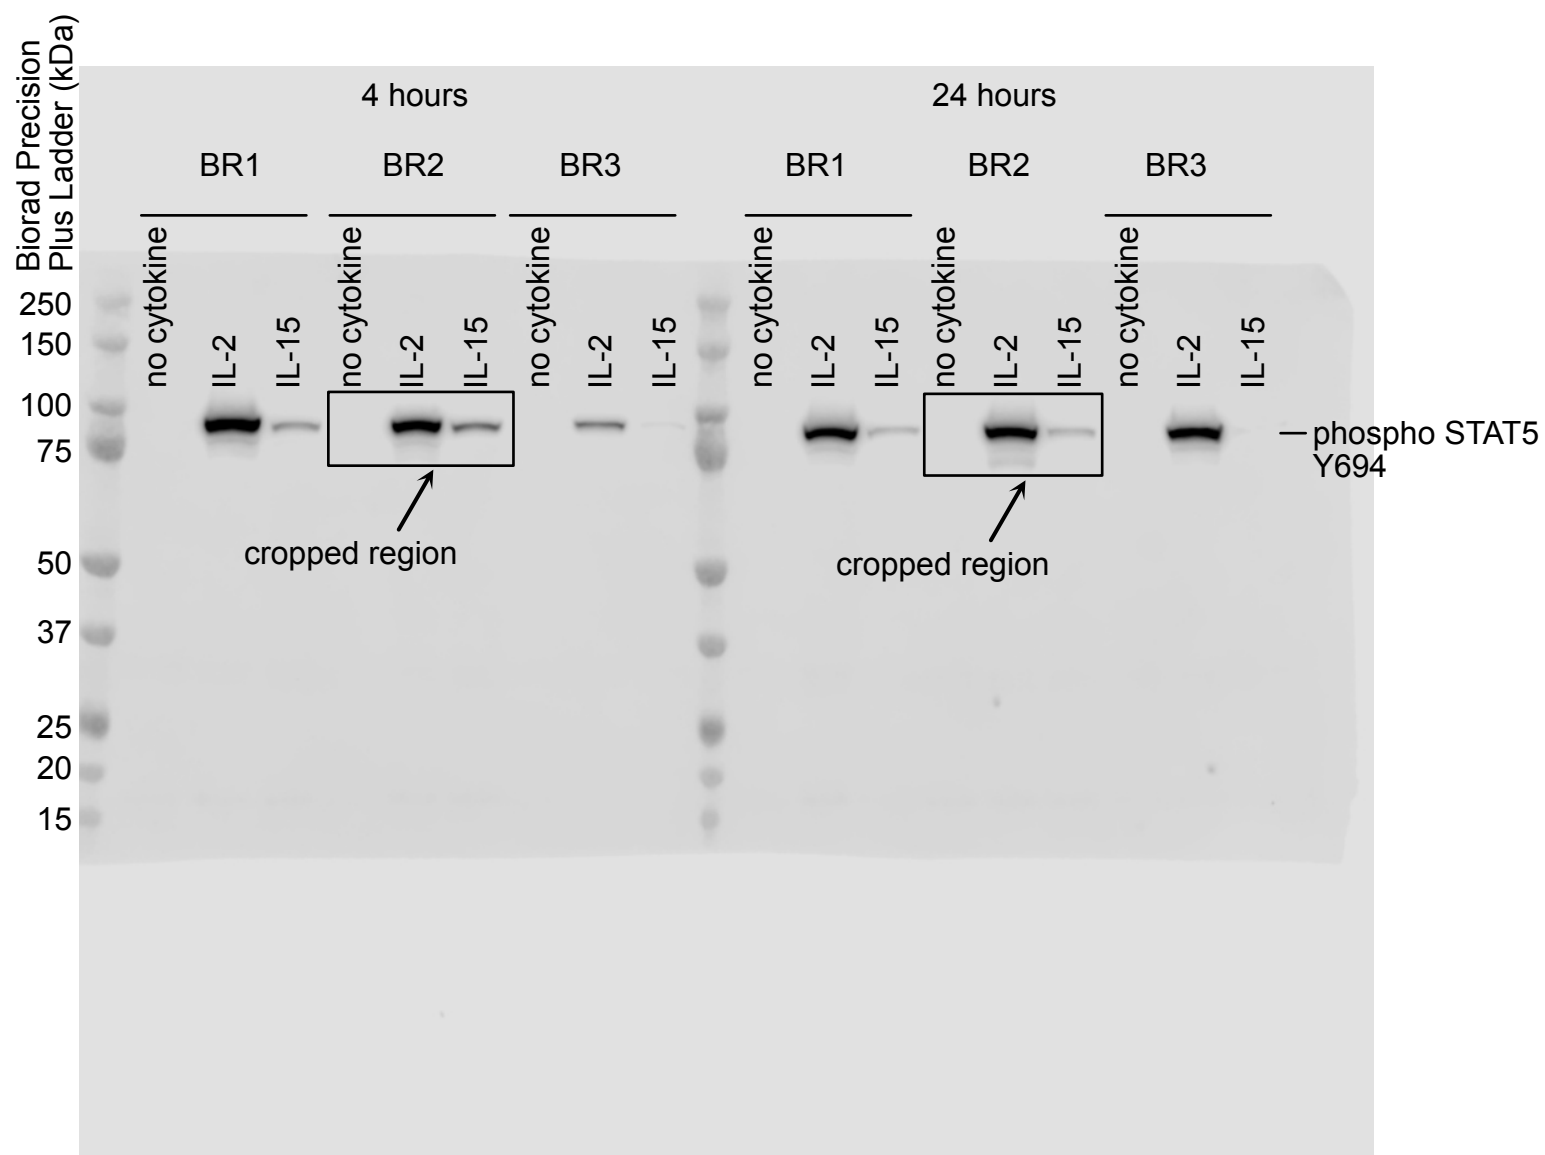

Figure 2 - source data 1

Uncropped and labelled membrane corresponding to Figure 2, panel A, phospho STAT5
