# Supplementary material for: PIM kinase control of CD8 T cell protein synthesis and cell trafficking
Source: eLife. 2025 May 13;13:RP98622. doi: 10.7554/eLife.98622 (PMC12074636; doi:10.7554/eLife.98622)
Supplement: Figure 1—figure supplement 1—source data 1. [file elife-98622-fig1-figsupp1-data1.xlsx]

## Sheet: 1S1A
	% of splenocytes
	WT CD4	Pim dKO CD4	WT CD8	PimdKO CD8
	13.2	9.39	9.18	8.23
	15.1	12.5	9.49	8.85
	14.9	12	8.34	10.7
	17.9	13.8	10.6	11.7
	11.1	12	8.14	8.72
	11.8	11	9.16	8.72
	17	15.9	10.6	10.8
	17.3	16.6	9.49	11.6

## Sheet: 1S1B
	T cell number per spleen
	WT CD4	Pim dKO CD4	WT CD8	PimdKO CD8
	7682400	3836933	5342760	3362935
	7281975	4679891	4576553	3313363
	11700564	4651304	6549175	4147413
	12202292	5207775	7225938	4415288
	5408965	2886667	3966574	2097644
	8073167	2828031	6266967	2241858
	6417905	3890356	4001752	2642506
	7927244	5316304	4348529	3715007

## Sheet: 1S1C
	Total cell number per spleen
	WT	Pim dKO
	58200000	40861905
	48225000	37439130
	78527273	38760870
	68169231	37737500
	48729412	24055556
	68416667	25709375
	37752381	24467647
	45822222	32025926
