# Supplementary material for: PIM kinase control of CD8 T cell protein synthesis and cell trafficking
Source: eLife. 2025 May 13;13:RP98622. doi: 10.7554/eLife.98622 (PMC12074636; doi:10.7554/eLife.98622)
Supplement: Figure 1—figure supplement 2—source data 1. [file elife-98622-fig1-figsupp2-data1.xlsx]

## Sheet: 1S2A
	PIM1 - summed peptide intensity
		naive WT			WT			Pim dKO			naive WT			WT			Pim dKO
	post-deletion	0	0	0	11453700	3149200	0	0	0		0	0	0	2698100	3071960	3110500	0	0	0
	pre-deletion	0	0	1058000	10575600	6888900	4081900	7024600	7275760		0	0	0	2539800	2512410	2869540	2356930	4882760	2174620

## Sheet: 1S2B
	PIM2 - summed peptide intensity
		naive WT			WT			Pim dKO			naive WT			WT			Pim dKO
		0	0	0	34939400	16703430	11057800	0	0		0	0	0	13300340	8075660	17722850	0	0	0
