# Supplementary material for: PIM kinase control of CD8 T cell protein synthesis and cell trafficking
Source: eLife. 2025 May 13;13:RP98622. doi: 10.7554/eLife.98622 (PMC12074636; doi:10.7554/eLife.98622)
Supplement: Figure 1—source data 1. [file elife-98622-fig1-data1.xlsx]

## Sheet: 1A
	Estimated protein copies per cell
	Time (hours)	0			1			3			6			9			12			18			24
	PIM1	0	0	0	142	0	0	7506	4457	3236	5348	5700	3416	6253	2711	3108	3457	4662	3553	4174	3027	2731	4132	2639	3767
	PIM2	0	0	0	0	0	0	0	0	0	0	452	0	614	642	758	3027	2135	2694	4628	4021	3458	6655	5847	4170

## Sheet: 1B
	Estimated protein copies per cell
		naive			24 h TCR
	PIM1	0	0	0	6748	10125	6029
	PIM2	0	0	0	21200	18835	24858

## Sheet: 1C
	FPKM
	Gene names	EntrezID	Description	RefseqIDs	CD8 Naïve			TCR activated 24 h
	Pim1	18712	proviral integration site 1	NM_008842//NP_032868	17.0073	24.9735	26.9196	237.386	219.983	236.792
	Pim2	18715	proviral integration site 2	NM_138606//NP_613072	76.6229	84.0412	96.6043	449.051	457.324	504.059
	Pim3	223775	proviral integration site 3	NM_145478//NP_663453	12.2293	11.7049	9.85529	41.2023	48.803	53.7664

## Sheet: 1G
	Protein content (µg/million cells)
	CD4 T cells									CD8 T cells
	naive WT			WT			Pim dKO			naive WT			WT			Pim dKO
	16.33	17.84	18.77	120.36	99.76	84.37	80.92	90.74		20.1	22.77	22	115.66	114.51	121.86	94.49	115.76	93.45

## Sheet: 1H
		CD8 T cells		dotted line qvalue = 0.05 at unadjusted p-value = 4.5			CD4 T cells		dotted line qvalue = 0.05 at unadjusted p-value = 4.5
	Gene Name	PimdKO_v_WT_log2FC	PimdKO_v_WT_p.val_-log10			Gene Name	PimdKO_v_WT_log2FC	PimdKO_v_WT_p.val_-log10
	Aaas	-0.567966	0.858428			Aaas	-0.756105	0.917239
	Aacs	-0.282595	0.692052			Aacs	-0.269006	0.280289
	Aagab	-0.660257	1.20611			Aagab	-0.688378	0.693373
	Aak1	-0.174858	0.201045			Aak1	0.0348741	0.0310263
	Aamdc					Aamdc
	Aamp	-0.220392	0.45377			Aamp	-0.608423	0.937415
	Aar2	-0.0538157	0.0734352			Aar2	-0.971569	1.38602
	Aars	-0.317988	0.596937			Aars	-0.333391	0.354034
	Aars2	-0.204717	0.266577			Aars2	0.0197083	0.0185649
	Aarsd1	-0.441248	0.807317			Aarsd1	-0.821799	1.38555
	Aasdhppt	-0.424481	1.01379			Aasdhppt	-1.12986	1.17678
	Aatf	-0.545848	0.80758			Aatf	-0.240696	0.234491
	Abca2					Abca2
	Abca3					Abca3	0.913696	0.875658
	Abca7	-1.01	1.2115			Abca7	0.283226	0.270612
	Abcb1a					Abcb1a
	Abcb1b	-0.136935	0.282184			Abcb1b	-0.255693	0.306626
	Abcb6	-0.998775	0.952233			Abcb6	-0.667141	0.623084
	Abcb7	-0.429772	0.929285			Abcb7	0.15605	0.149773
	Abcb8	-1.04783	0.771171			Abcb8	-1.13815	0.925319
	Abcc1	-0.59012	1.19613			Abcc1	1.35368	0.748246
	Abcc4	-0.505991	1.18052			Abcc4	-0.600695	0.830075
	Abcd1	0.622267	0.752417			Abcd1	-0.308392	0.355092
	Abcd3	-0.572927	0.576086			Abcd3	-0.172596	0.213979
	Abcd4					Abcd4	-0.173927	0.0940081
	Abce1	-0.0648347	0.112758			Abce1	-0.33084	0.460724
	Abcf1	-0.173241	0.36726			Abcf1	-0.15076	0.178069
	Abcf2	-0.297614	0.756672			Abcf2	-0.38835	0.571011
	Abcf3	-0.282193	0.596357			Abcf3	-0.39778	0.411535
	Abcg1	-1.27879	0.88115			Abcg1	0.511425	0.446115
	Abcg2	-0.106545	0.11487			Abcg2	0.174565	0.096909
	Abcg3	0.426608	0.161717			Abcg3	-0.109918	0.0575907
	Abhd10	-0.0188849	0.012278			Abhd10	-1.30185	1.82453
	Abhd11	-1.11615	1.08202			Abhd11	-0.0988767	0.0750352
	Abhd12	-0.626706	0.927523			Abhd12	-0.2448	0.264013
	Abhd14b	1.33065	2.16704			Abhd14b	-0.309144	0.236709
	Abhd15	0.549998	0.386447			Abhd15
	Abhd16a	-1.52212	2.51866			Abhd16a	-0.565313	0.509368
	Abhd17a					Abhd17a
	Abhd17b	-1.76501	1.59443			Abhd17b	-0.258028	0.14654
	Abhd17c					Abhd17c	-1.12013	0.514792
	Abhd2	-0.0425904	0.0453502			Abhd2	0.0565361	0.0383033
	Abhd6	0.280924	0.55469			Abhd6	-0.262155	0.30592
	Abi1	-0.227188	0.290224			Abi1	-0.329248	0.252716
	Abi3	-0.748676	0.613187			Abi3	-0.434339	0.214495
	Abl1	-0.10714	0.0743997			Abl1	-0.0015102	0.00116694
	Abl2	0.347022	0.165916			Abl2	-0.483655	0.713848
	Ablim1	-0.658812	0.770393			Ablim1	-0.163168	0.193995
	Ablim3	-0.203195	0.0927765			Ablim3	-1.69207	0.656782
	Abr	-0.887123	0.528269			Abr	-1.12439	0.779135
	Abracl	0.153088	0.137645			Abracl	-0.14607	0.143563
	Abt1	-0.845924	1.67322			Abt1	-0.791035	1.14698
	Abtb2	-0.306299	0.121708			Abtb2	0.480626	0.291029
	Acaa1a;Acaa1b	-0.124542	0.186026			Acaa1a;Acaa1b	0.0304089	0.0284235
	Acaa2	-0.307635	0.783369			Acaa2	-0.146852	0.176511
	Acaca	-0.376042	0.72799			Acaca	-0.456392	0.536739
	Acacb	-0.456632	0.370784			Acacb	-0.60106	0.526049
	Acad10	-0.0977281	0.0904641			Acad10	0.149812	0.194464
	Acad11	-0.947392	1.08728			Acad11	-0.16024	0.164405
	Acad8	0.834007	1.81347			Acad8	-0.184255	0.171154
	Acad9	-0.307199	0.554631			Acad9	-0.130131	0.128144
	Acadl	0.276194	0.405425			Acadl	0.671538	0.860961
	Acadm	-0.364811	0.742535			Acadm	0.307453	0.311932
	Acads	0.104188	0.198021			Acads	0.227174	0.254631
	Acadsb	-0.650671	1.64826			Acadsb	-0.593763	0.558617
	Acadvl	-0.402108	0.954231			Acadvl	-0.108733	0.11609
	Acap1	-0.313942	0.55451			Acap1	0.073314	0.0718434
	Acap2	-0.772804	1.22425			Acap2	-0.606951	0.745581
	Acat1	-0.493416	0.356013			Acat1	0.530109	0.450571
	Acat2	0.00496772	0.00683582			Acat2	0.187605	0.211631
	Acbd3	-0.112302	0.155972			Acbd3	0.181196	0.221478
	Acbd5	-0.809698	0.283609			Acbd5	-0.0392907	0.023178
	Acbd6	-0.530467	0.790436			Acbd6	-0.278609	0.260657
	Accs	-0.650383	0.588488			Accs	-0.987295	1.23604
	Acd	-1.02103	1.13347			Acd	-0.723064	0.725083
	Acin1	-0.251237	0.361888			Acin1	-0.0331838	0.029887
	Acly	-0.378882	0.857161			Acly	-0.0591936	0.0585104
	Aco1	-0.0078455	0.00770719			Aco1	0.11926	0.138342
	Aco2	-0.279568	0.653416			Aco2	-0.248442	0.282804
	Acot11					Acot11
	Acot13	-0.287277	0.566861			Acot13	0.0350886	0.0406309
	Acot2	0.122143	0.154881			Acot2	0.268862	0.326573
	Acot7	-0.347679	0.805212			Acot7	-0.429653	0.597339
	Acot8	-0.585896	0.704618			Acot8	-0.997117	0.62909
	Acot9	-0.366569	0.510262			Acot9	0.338146	0.291968
	Acox1	1.37231	0.562881			Acox1
	Acox3	-1.49163	0.970477			Acox3	-0.589608	0.562805
	Acp1	-0.425278	0.74512			Acp1	-0.669283	0.905493
	Acp1	-0.264591	0.530827			Acp1	-0.0597962	0.0556652
	Acp5	-1.11739	0.977084			Acp5	-1.76794	1.20146
	Acp6	0.915831	1.6914			Acp6	0.801821	0.575037
	Acsf2	-0.498364	1.08751			Acsf2	-0.182084	0.154972
	Acsf3	-0.932767	1.2179			Acsf3	1.63271	1.82212
	Acsl1	-0.54677	0.738673			Acsl1	-0.536969	0.764812
	Acsl3	-0.31132	0.210767			Acsl3	1.29447	0.642791
	Acsl4	-0.278249	0.564695			Acsl4	-0.4995	0.66537
	Acsl5	0.139099	0.213449			Acsl5	-0.0219968	0.01885
	Acsl6	0.30641	0.182899			Acsl6
	Acss1	0.0514025	0.0368922			Acss1	0.917535	0.621455
	Acss2	0.566001	0.620427			Acss2	0.349527	0.384775
	Actb	0.0627519	0.0727324			Actb	0.127408	0.120444
	Actbl2	-0.112472	0.0488774			Actbl2	1.36518	0.731554
	Actc1;Acta2;Actg2	0.431884	0.817879			Actc1;Acta2;Actg2	-0.145482	0.115674
	Actg1	-0.118386	0.196358			Actg1	0.0718518	0.0774204
	Actl6a	-0.102613	0.162586			Actl6a	0.0796195	0.0788157
	Actn1	-0.351097	0.78199			Actn1	-0.200531	0.221976
	Actn2	-0.270043	0.269427			Actn2	0.943924	0.616086
	Actn4	-0.329514	0.519802			Actn4	-0.142625	0.139836
	Actr10	-0.333928	0.727094			Actr10	-0.743401	0.991616
	Actr1a	-0.0618298	0.0658384			Actr1a	0.0439648	0.0478536
	Actr1b	-0.288131	0.373301			Actr1b	0.421868	0.620376
	Actr2	-0.420752	1.005			Actr2	-0.125495	0.153374
	Actr3	-0.094275	0.165139			Actr3	-0.223177	0.270338
	Actr5	-0.489978	0.702476			Actr5	-0.899773	1.26623
	Actr6	-1.14926	1.03041			Actr6	-0.38026	0.359696
	Actr8	-0.850336	0.813414			Actr8	-0.246366	0.323292
	Acy1	-0.451071	1.09144			Acy1	-0.669963	0.927214
	Acyp1	-1.36624	1.05186			Acyp1	0.295073	0.26645
	Ada	-0.224014	0.314945			Ada	-0.323595	0.394858
	Adal	0.540168	0.197117			Adal	-1.85014	1.10239
	Adam10	-0.314846	0.439916			Adam10	-0.233667	0.23276
	Adam17	-0.860372	0.790503			Adam17	0.185671	0.194759
	Adap1;Adap2					Adap1;Adap2	0.419154	0.249248
	Adar					Adar	-0.254872	0.330698
	Adar	-0.437595	0.931722			Adar
	Adarb1	-0.88706	1.2966			Adarb1	-1.69221	0.79982
	Adat1	-0.392671	0.622413			Adat1	0.0100619	0.00645165
	Adat2	-1.80771	1.15721			Adat2	-0.474613	0.21549
	Adat3	-0.238406	0.353073			Adat3	-0.901085	1.05646
	Adck1	0.523902	0.439969			Adck1	-0.684192	0.922164
	Adck3					Adck3
	Adck4	0.0777458	0.0565877			Adck4	0.273462	0.266774
	Adck5	-0.64872	0.34973			Adck5	-1.38682	0.369922
	Adcy3					Adcy3	-1.55497	1.01119
	Adcy7	-0.797918	0.947896			Adcy7	-0.695238	0.485939
	Add1	-0.207549	0.417464			Add1	-0.22161	0.249945
	Add3					Add3	0.123721	0.158715
	Add3	-0.318206	0.365805			Add3
	Adh1					Adh1	1.02431	1.44941
	Adh5	-0.0038745	0.00471757			Adh5	0.279757	0.34359
	Adi1	-0.303914	0.291691			Adi1	0.194156	0.260394
	Adk	-0.132425	0.276061			Adk	-0.516145	0.738859
	Adnp	-0.713012	1.83324			Adnp	0.0135003	0.0106153
	Adnp2	-0.0923029	0.0981934			Adnp2	-0.7094	0.861346
	Ado	-0.278877	0.301536			Ado	-0.233845	0.233834
	Adpgk	-0.118382	0.227816			Adpgk	0.239267	0.28901
	Adprh	-0.104141	0.155433			Adprh	0.0558361	0.0415817
	Adprhl2	-0.0847259	0.14646			Adprhl2	0.205277	0.274112
	Adprm	-0.244657	0.140043			Adprm	-1.32692	0.357809
	Adrbk1	-0.0989191	0.124186			Adrbk1	-0.413489	0.597652
	Adrm1	-0.0516701	0.074637			Adrm1	-0.535486	0.756157
	Adsl	-0.360667	0.582931			Adsl	-0.0810825	0.0666389
	Adss	-0.063913	0.108259			Adss	-0.185693	0.229637
	Aebp2	-0.237357	0.379076			Aebp2	-0.793655	0.931109
	Aen	-0.734232	1.18039			Aen	-0.710369	0.81304
	Aff3	-0.232652	0.0558253			Aff3	-0.390417	0.125941
	Aff4	0.0500272	0.0299159			Aff4	-1.15228	1.50669
	Afg3l1	-0.298813	0.577396			Afg3l1	-0.276935	0.358075
	Afg3l2	-0.237676	0.432408			Afg3l2	-0.0215459	0.0201577
	Aftph	-0.167863	0.111758			Aftph	-0.826688	0.308717
	Aga	-1.66127	2.00164			Aga	-0.251122	0.137923
	Agap2	-0.850061	1.87365			Agap2	-0.183858	0.115777
	Agap3	0.103413	0.123045			Agap3	0.609214	0.368712
	Agfg1	0.448386	0.551105			Agfg1
	Agfg1	-0.0232198	0.0279588			Agfg1	-0.223948	0.288069
	Agfg2	-0.594428	1.16068			Agfg2	-0.542299	0.853872
	Aggf1	1.57777	1.07647			Aggf1	0.405243	0.132761
	Agk	-0.431714	1.06591			Agk	-0.0272842	0.029187
	Ago1	-0.632665	1.23547			Ago1	-0.27129	0.327954
	Ago2	-0.0066655	0.00995906			Ago2	0.0471653	0.0516229
	Ago3					Ago3
	Agpat1	-0.33524	0.162165			Agpat1	0.190409	0.213419
	Agpat2	-0.756171	0.784166			Agpat2	0.950893	1.33489
	Agpat3	-1.14344	1.09605			Agpat3	-0.449053	0.34168
	Agpat4	-0.613051	0.633105			Agpat4	-0.503222	0.202589
	Agpat5	0.716067	0.924945			Agpat5	-0.420858	0.36265
	Agpat6	-0.0485152	0.0332678			Agpat6	0.531685	0.716182
	Agps	-0.30135	0.670534			Agps	-0.268955	0.368225
	Agtrap	-1.33146	0.91152			Agtrap	-0.421328	0.428442
	Ahctf1	-0.801058	1.56468			Ahctf1	-0.292535	0.36147
	Ahcy	-0.349581	0.856166			Ahcy	-0.283941	0.36702
	Ahcyl1	-0.679821	0.738223			Ahcyl1	0.384069	0.310065
	Ahcyl2	-0.308866	0.546678			Ahcyl2	0.216612	0.223358
	Ahdc1	-0.233849	0.164841			Ahdc1
	Ahi1					Ahi1
	Ahnak	-0.143871	0.0990021			Ahnak	0.586321	0.201973
	Ahsa1	-0.148371	0.203968			Ahsa1	-0.205079	0.274131
	Ahsa2	-1.11879	1.42954			Ahsa2	-0.0139887	0.00870969
	Aida	-0.276988	0.335162			Aida	1.45673	0.606723
	Aifm1	-0.0892387	0.135719			Aifm1	0.380174	0.530193
	Aim1	-1.22644	0.710831			Aim1	0.0983166	0.0825917
	Aim2	-1.86372	1.28129			Aim2	-0.559431	0.251304
	Aimp1	-0.275928	0.641151			Aimp1	-0.152975	0.197327
	Aimp2	-0.669376	0.669816			Aimp2	-0.776443	0.869033
	Aip	-0.924227	1.00068			Aip	-0.592774	0.603004
	Ak2	-0.464581	0.486537			Ak2	-0.209252	0.188418
	Ak3	-0.239587	0.513614			Ak3	0.0562329	0.0620818
	Ak4	-1.17208	0.381264			Ak4	-0.453023	0.232183
	Ak6	-0.753401	0.605191			Ak6	-0.864188	0.585582
	Akap1	-1.31846	1.19419			Akap1	-0.971221	1.07778
	Akap10	-0.166343	0.143558			Akap10	0.255423	0.264462
	Akap11	-1.39655	1.37761			Akap11	-0.702	0.831653
	Akap12					Akap12
	Akap13	-0.290669	0.438979			Akap13	0.124988	0.124892
	Akap2	-2.31437	1.82101			Akap2
	Akap4					Akap4
	Akap8	-0.226445	0.33921			Akap8	-0.360896	0.334447
	Akap8l	-0.0479059	0.0613319			Akap8l	0.84	1.28858
	Akap9	-0.246615	0.388967			Akap9	-1.12687	1.77385
	Akna	0.0203082	0.0254511			Akna	-0.405288	0.303373
	Akr1a1	-0.0877431	0.142957			Akr1a1	0.131349	0.148133
	Akr1b1	-0.333025	0.524577			Akr1b1	-0.253545	0.341312
	Akr1b10	-0.722194	0.365094			Akr1b10	1.45756	1.3541
	Akr1c13	0.0913137	0.07249			Akr1c13	2.25887	2.09826
	Akr1c18					Akr1c18	3.27564	2.64454
	Akr1e2	0.517444	0.64169			Akr1e2	0.279698	0.243259
	Akr7a2	0.191611	0.40106			Akr7a2	0.151626	0.180859
	Akt1	-0.454572	0.6919			Akt1	-0.376784	0.599313
	Akt1s1	-1.25517	1.20683			Akt1s1	0.929491	0.898859
	Akt2	0.00719382	0.00851087			Akt2	0.342459	0.327947
	Aktip	0.265811	0.263031			Aktip	-0.720047	0.876994
	Alad	-0.438889	0.855629			Alad	-0.752324	0.899413
	Alas1	0.259091	0.127558			Alas1	-0.954878	0.980137
	Alb	-0.817615	0.319055			Alb	-0.404948	0.141269
	Alcam	0.160045	0.191259			Alcam	1.04881	1.18646
	Aldh16a1	-0.245691	0.35616			Aldh16a1	-0.511944	0.675537
	Aldh18a1	-0.512792	1.2321			Aldh18a1	-0.494984	0.779132
	Aldh1b1	0.215071	0.348353			Aldh1b1	0.0912539	0.0741166
	Aldh1l1					Aldh1l1
	Aldh2	0.0452998	0.0261366			Aldh2	0.520132	0.809853
	Aldh3a2	-0.485674	0.488986			Aldh3a2	0.331701	0.463826
	Aldh4a1	-0.329906	0.385831			Aldh4a1	0.288599	0.260559
	Aldh5a1					Aldh5a1
	Aldh6a1	0.0438382	0.0459627			Aldh6a1	0.57123	0.907219
	Aldh7a1	-0.118738	0.103572			Aldh7a1	0.21611	0.274185
	Aldh9a1	-0.345569	0.710597			Aldh9a1	-0.0106437	0.0110681
	Aldoa	-0.422252	0.611582			Aldoa	-0.135027	0.113517
	Aldob	-0.251103	0.327368			Aldob	-0.579719	0.783346
	Aldoc	-1.38651	0.717383			Aldoc	-0.114032	0.050221
	Alg1	-1.28227	1.12614			Alg1	0.667983	0.458824
	Alg10b	-0.610082	0.150178			Alg10b	-1.55393	1.72022
	Alg11	0.229907	0.492414			Alg11	0.304111	0.209453
	Alg12	-0.165446	0.07253			Alg12	-0.541144	0.491685
	Alg14					Alg14
	Alg2	-0.135068	0.118375			Alg2	0.292584	0.436111
	Alg3	-0.98571	1.41728			Alg3	0.767402	0.552399
	Alg5	0.154137	0.221919			Alg5	-0.160289	0.169888
	Alg8	1.20014	2.05502			Alg8	-1.12317	0.502751
	Alg9	-1.20036	0.547451			Alg9	1.63438	1.49587
	Alkbh1	-0.484157	0.788741			Alkbh1	-0.551674	0.73527
	Alkbh2	0.146555	0.0807521			Alkbh2	-0.613397	0.566459
	Alkbh3	-0.180672	0.309776			Alkbh3	-0.508221	0.817635
	Alkbh4	-0.23965	0.214824			Alkbh4	0.764778	0.737907
	Alkbh5	0.615983	1.22908			Alkbh5	-0.0757741	0.0809791
	Alkbh6	0.0368699	0.0312084			Alkbh6	-1.19669	1.37254
	Alkbh7	-0.493224	0.356454			Alkbh7	-0.527184	0.806764
	Alkbh8	0.297556	0.305441			Alkbh8	0.0282499	0.00909412
	Alms1	-0.574628	0.31095			Alms1	-2.55569	1.46688
	Alox15					Alox15
	Alpl	-1.76832	1.79067			Alpl	-0.315255	0.193688
	Als2	0.00646736	0.00531547			Als2	-0.678072	0.429069
	Als2cl	-0.0389409	0.029157			Als2cl	-0.22766	0.31965
	Alyref	-0.335677	0.650649			Alyref	0.287897	0.403318
	Alyref2					Alyref2
	Amacr	0.280745	0.184587			Amacr	0.437901	0.666303
	Ambra1	-1.99356	1.76474			Ambra1	-0.0142883	0.00502515
	Amd1;Amd2	-0.325507	0.42687			Amd1;Amd2	-1.30579	1.11628
	Amdhd2	-1.24044	0.892763			Amdhd2	-0.048403	0.0531316
	Amfr	-1.24801	2.91891			Amfr	-0.856836	0.922664
	Amica1	-1.59427	1.72788			Amica1
	Ammecr1	-0.0499242	0.0170839			Ammecr1	-4.18668	1.02535
	Ammecr1l	0.261672	0.291684			Ammecr1l	-0.860269	1.07187
	Ampd2	-0.322346	0.638866			Ampd2	-0.226793	0.16301
	Ampd3	-1.65951	1.08547			Ampd3	-0.598117	0.123263
	Anapc1	0.0289166	0.0465098			Anapc1	-0.456731	0.521317
	Anapc10	-1.32096	0.889077			Anapc10	0.25082	0.132253
	Anapc11	-0.146308	0.0986824			Anapc11	-0.782256	0.502741
	Anapc2	-0.735348	0.956648			Anapc2	-0.570732	0.367831
	Anapc4	-0.230392	0.448893			Anapc4	-0.48927	0.477444
	Anapc5	-0.284264	0.285724			Anapc5	0.102341	0.0753543
	Anapc7	-0.225196	0.24288			Anapc7	0.0263323	0.0245947
	Angel2	-0.459718	1.0433			Angel2	-0.0555103	0.0580789
	Ankfy1	-0.693901	0.988809			Ankfy1	-0.33676	0.325004
	Ankhd1	-0.0181039	0.0254726			Ankhd1	-0.0800194	0.0738666
	Ankib1	3.54824	3.41417			Ankib1	-1.4087	0.922583
	Ankle2	-0.140441	0.183179			Ankle2	-0.270293	0.24857
	Ankmy2	-0.0509124	0.0783832			Ankmy2	-0.29925	0.416585
	Ankrd10	-0.569532	0.250336			Ankrd10	-0.513542	0.207396
	Ankrd11	-0.771653	1.08442			Ankrd11	0.00632028	0.00578996
	Ankrd12	-2.56927	1.74508			Ankrd12	0.633676	0.253245
	Ankrd13a	-0.188735	0.269177			Ankrd13a	-0.106372	0.1252
	Ankrd13c					Ankrd13c
	Ankrd16	0.869758	0.908578			Ankrd16
	Ankrd17	-0.261456	0.355705			Ankrd17	-0.264681	0.339287
	Ankrd27	0.00153317	0.00188253			Ankrd27	-0.586673	0.634392
	Ankrd28	-0.241441	0.303462			Ankrd28	-0.580047	0.771024
	Ankrd32	-0.770084	0.926854			Ankrd32	-1.02076	0.508237
	Ankrd39	-1.43354	0.60843			Ankrd39	-1.05112	0.351001
	Ankrd40	0.304452	0.119367			Ankrd40	-0.661999	0.723763
	Ankrd44	-0.0269647	0.0412174			Ankrd44	-0.0514694	0.0609336
	Ankrd46	-1.64532	0.848674			Ankrd46	0.11829	0.0972697
	Ankrd50	-2.14554	1.8236			Ankrd50	-2.22108	1.77345
	Ankrd52	-0.123383	0.124735			Ankrd52	-0.995128	1.17061
	Ankrd54	-0.382643	0.73171			Ankrd54	-1.27263	0.836603
	Anks1a	-0.127916	0.129962			Anks1a	0.251054	0.159481
	Ankzf1	-0.580152	0.42559			Ankzf1	-0.577894	0.480646
	Anln	-0.208996	0.237559			Anln	-1.58278	1.96102
	Ano10	0.44512	0.587692			Ano10	0.111381	0.0966648
	Ano6	0.0245298	0.0326007			Ano6	0.273044	0.303759
	Anp32a	-0.020356	0.0275393			Anp32a	0.11214	0.122757
	Anp32b	-0.177168	0.285982			Anp32b	-0.503779	0.688093
	Anp32e	-0.0343074	0.0330041			Anp32e	-0.0632987	0.0719077
	Antxr2					Antxr2
	Anxa1	1.50815	0.388592			Anxa1	1.32482	0.43724
	Anxa11	-0.756093	1.63612			Anxa11	0.138561	0.161304
	Anxa2	-0.43541	0.223444			Anxa2	0.36484	0.172207
	Anxa3	-0.166133	0.105271			Anxa3	0.223966	0.224201
	Anxa4	0.0576845	0.0307141			Anxa4	-0.124619	0.0693339
	Anxa5	0.213567	0.316259			Anxa5	0.517434	0.680875
	Anxa6	-0.0646051	0.104702			Anxa6	-0.0894763	0.096898
	Anxa7	-0.265073	0.622596			Anxa7	-0.0221733	0.0211125
	Ap1ar	0.623014	0.989946			Ap1ar	-0.704951	0.625871
	Ap1b1	-0.139946	0.28813			Ap1b1	-0.313207	0.378209
	Ap1g1	-0.469094	1.09402			Ap1g1	-0.34296	0.412095
	Ap1g2	-0.275499	0.490994			Ap1g2	-0.265143	0.203327
	Ap1m1	-0.305667	0.611616			Ap1m1	0.171782	0.190286
	Ap1s1	-0.270484	0.474345			Ap1s1	-0.411747	0.310205
	Ap1s2	-1.19717	0.920098			Ap1s2
	Ap1s3	0.192239	0.260036			Ap1s3
	Ap2a1	-0.18062	0.343509			Ap2a1	-0.20544	0.217853
	Ap2a2	-0.282013	0.502526			Ap2a2	-0.262744	0.272354
	Ap2b1	0.195623	0.182156			Ap2b1	0.00732328	0.00637582
	Ap2m1	-0.092362	0.132633			Ap2m1	-0.0511609	0.0563098
	Ap2s1	-0.663813	1.26542			Ap2s1	0.562357	0.609495
	Ap3b1	0.218812	0.366253			Ap3b1	-0.289655	0.372459
	Ap3d1	-0.259366	0.277769			Ap3d1	-0.217165	0.303042
	Ap3m1	-0.528902	0.706719			Ap3m1	-0.89211	1.48431
	Ap3m2	2.98313	2.31299			Ap3m2
	Ap3s1	-0.455269	0.577906			Ap3s1	-0.428119	0.66374
	Ap3s2	0.138332	0.105574			Ap3s2	1.11039	0.511488
	Ap4b1	-1.21838	0.879298			Ap4b1	-0.279539	0.153479
	Ap4e1	-0.608523	0.750283			Ap4e1	0.51168	0.370705
	Ap4m1	-0.879215	0.526963			Ap4m1	-0.66257	0.561863
	Ap4s1	0.57952	0.420278			Ap4s1	-0.468442	0.406308
	Ap5b1					Ap5b1
	Ap5m1	0.615468	0.310401			Ap5m1	-0.583333	0.671377
	Ap5z1	1.78702	0.654938			Ap5z1
	Apaf1	-1.06994	1.51368			Apaf1	0.267997	0.151352
	Apbb1ip	-0.124025	0.118237			Apbb1ip	0.339116	0.341259
	Apc	1.60144	0.817846			Apc	-3.57782	1.07776
	Apeh	-0.468669	0.775426			Apeh	-0.0785068	0.0820657
	Apex1	-0.226853	0.483416			Apex1	-0.0104447	0.0102388
	Apex2	-0.770285	1.33044			Apex2	-0.731074	0.226402
	Aph1a	-0.423074	0.837963			Aph1a
	Api5	-0.342045	0.497885			Api5	-0.112541	0.0937194
	Apip	-0.754603	1.94473			Apip	-0.75451	0.650082
	Apitd1	0.0163158	0.00613633			Apitd1	0.43775	0.255654
	Aplf	0.192942	0.111524			Aplf	0.706315	0.374599
	Apmap	-0.142823	0.179715			Apmap	-0.409863	0.407019
	Apoa1bp	-0.883088	0.814664			Apoa1bp
	Apob	0.408117	0.539082			Apob	-1.56903	0.662158
	Apobec3	-0.244599	0.529292			Apobec3	-0.292266	0.415134
	Apobr					Apobr
	Apoe					Apoe
	Apoo	-0.836094	1.19951			Apoo	0.359888	0.290489
	Apool	-0.0574112	0.0707339			Apool	0.193254	0.235845
	Apopt1	0.13773	0.258896			Apopt1
	Appbp2	-0.582828	1.53439			Appbp2	-0.806841	0.954497
	Appl1	-0.49765	1.11102			Appl1	-0.0794912	0.0909062
	Appl2	0.269596	0.184978			Appl2
	Aprt	-0.532074	1.02083			Aprt	-0.372348	0.470149
	Aptx	-0.191251	0.110165			Aptx	-1.27264	0.86871
	Aqr	-0.324534	0.634966			Aqr	-0.225364	0.28085
	Araf	0.0234772	0.0275326			Araf	-0.500182	0.816084
	Arap1	0.0806628	0.108727			Arap1	1.17259	1.29514
	Arap2	-0.1461	0.103731			Arap2	-0.0206806	0.0118681
	Arcn1	-0.103926	0.170517			Arcn1	-0.263497	0.365065
	Arel1	0.367117	0.248316			Arel1	2.54569	2.63356
	Arf1;Arf3	-0.501736	1.29182			Arf1;Arf3	-0.386617	0.472195
	Arf2	-0.177105	0.170129			Arf2	-0.305653	0.174717
	Arf4	-0.238357	0.403761			Arf4	-1.37209	0.86344
	Arf5	-0.514312	0.946896			Arf5	-0.28865	0.332483
	Arf6	0.301069	0.678841			Arf6	-0.22232	0.31657
	Arfgap1	-0.645174	0.980476			Arfgap1	-1.01425	1.3645
	Arfgap2	-0.1582	0.237741			Arfgap2	-0.197228	0.23534
	Arfgap3	-0.472527	0.877206			Arfgap3	-1.24199	0.816781
	Arfgef1	-0.143195	0.198331			Arfgef1	0.0168037	0.0113904
	Arfgef2	-0.0511665	0.0510036			Arfgef2	0.228494	0.300884
	Arfip1	-0.442881	1.17965			Arfip1	-0.0310668	0.0156124
	Arfip1	-0.350384	0.814285			Arfip1	-0.16154	0.161083
	Arfip2	-0.916585	1.04891			Arfip2	1.75439	1.54638
	Arfrp1	-0.131987	0.178009			Arfrp1	-0.0673991	0.0808548
	Arglu1	-0.195385	0.280879			Arglu1	-1.57999	1.00754
	Arhgap1	-0.55282	1.12617			Arhgap1	-0.0244906	0.0265637
	Arhgap10	-1.04633	0.710775			Arhgap10
	Arhgap11a	-0.074969	0.0780049			Arhgap11a	-2.76162	1.80602
	Arhgap12	-0.361154	0.467666			Arhgap12	0.474001	0.608921
	Arhgap15	-0.0787203	0.105542			Arhgap15	0.0177694	0.011666
	Arhgap17	-0.260778	0.347356			Arhgap17	0.0522021	0.035658
	Arhgap18	-1.55821	0.806826			Arhgap18	-0.817712	0.444646
	Arhgap25	-0.268207	0.273622			Arhgap25	-0.645126	0.719132
	Arhgap26					Arhgap26
	Arhgap27	-0.551607	0.582413			Arhgap27	0.479992	0.354499
	Arhgap30	-0.275021	0.608714			Arhgap30	-0.194233	0.191422
	Arhgap31	0.166789	0.194834			Arhgap31	0.627593	0.273377
	Arhgap4	0.103454	0.133784			Arhgap4	-0.400678	0.487737
	Arhgap5	0.079673	0.0755788			Arhgap5	0.339518	0.391547
	Arhgap9	-0.120932	0.0822855			Arhgap9	-0.284075	0.252843
	Arhgdia	-0.235923	0.359808			Arhgdia	0.010446	0.0104516
	Arhgdib	-0.359228	0.760833			Arhgdib	0.115143	0.147104
	Arhgef1	-0.487997	1.00605			Arhgef1	-0.425709	0.487451
	Arhgef11					Arhgef11
	Arhgef18	0.0987438	0.097512			Arhgef18	-0.30956	0.203125
	Arhgef2	-0.488062	0.947169			Arhgef2	-0.27146	0.327051
	Arhgef3	2.77757	1.19869			Arhgef3	-2.66415	1.30825
	Arhgef6	-0.189075	0.242583			Arhgef6	-0.21863	0.245997
	Arhgef7	-0.105027	0.0972887			Arhgef7	-0.0792214	0.0778264
	Arid1a	0.258574	0.137092			Arid1a	0.0191036	0.0151399
	Arid1a	-0.121841	0.190021			Arid1a	0.658472	0.400372
	Arid1b	-0.117383	0.0626701			Arid1b	-0.0637007	0.0428169
	Arid2	-0.70437	0.952178			Arid2	-0.508906	0.556072
	Arid3a	0.985864	1.68596			Arid3a	-0.618259	0.701169
	Arid4a	-0.67808	0.78233			Arid4a	0.181648	0.167168
	Arid4b	-0.322383	0.557259			Arid4b	0.0269257	0.0281706
	Arid5a	-0.739445	0.546066			Arid5a	-0.330896	0.289163
	Arid5b	-1.5015	0.926785			Arid5b	1.47277	1.54326
	Arih1	-0.382879	0.973069			Arih1	-0.61376	0.786572
	Arih2	-0.22157	0.335626			Arih2	0.188317	0.175186
	Arl1	-0.904343	1.45497			Arl1	-0.0470901	0.0517128
	Arl14ep	1.01983	0.451763			Arl14ep	0.516758	0.315531
	Arl2	0.357863	0.531745			Arl2	-0.02356	0.024745
	Arl2bp	-0.0883306	0.0275757			Arl2bp	0.550941	0.409862
	Arl3	-0.225316	0.28162			Arl3	-0.377017	0.45613
	Arl4c					Arl4c
	Arl5a	-0.146033	0.212774			Arl5a	0.787236	0.348397
	Arl6	0.888582	0.630559			Arl6	0.00652968	0.0032368
	Arl6ip1	-1.39607	0.96318			Arl6ip1	-1.80292	1.37136
	Arl6ip4	-0.849316	1.1409			Arl6ip4	-0.884349	0.51881
	Arl6ip5	-0.0893563	0.120551			Arl6ip5	0.440274	0.650565
	Arl6ip6	-0.38688	0.21981			Arl6ip6	1.7513	1.0215
	Arl8a	0.189477	0.123735			Arl8a	-1.85648	1.88144
	Arl8b	-0.723493	1.36381			Arl8b	-0.154097	0.166318
	Armc1	-0.303144	0.507679			Armc1	-0.99853	1.19712
	Armc10	-0.301778	0.450666			Armc10	-0.327943	0.379041
	Armc5	-0.460736	0.486411			Armc5	-0.574778	0.411235
	Armc6	-0.663431	1.1238			Armc6	-0.0243537	0.0148045
	Armc8	-0.147744	0.215366			Armc8	0.0166979	0.0115739
	Armc9	0.712572	1.20619			Armc9
	Armcx3	-0.838751	0.598159			Armcx3
	Armt1	-0.347955	0.317615			Armt1	-0.406967	0.428701
	Arnt	-0.488653	1.00851			Arnt	-0.509322	0.35427
	Arpc1a	-1.10291	1.86277			Arpc1a	-0.891156	0.984139
	Arpc1b	-0.336232	0.692158			Arpc1b	-0.545797	0.855903
	Arpc2	-0.258673	0.36628			Arpc2	-0.151572	0.132187
	Arpc3	-0.985772	0.886428			Arpc3	0.199488	0.107374
	Arpc4	-0.411782	0.550789			Arpc4	0.047668	0.0546425
	Arpc5	-0.878835	1.4252			Arpc5	-0.373367	0.326475
	Arpc5l	-1.37646	1.96779			Arpc5l	0.025711	0.0231569
	Arr3					Arr3
	Arrb1	-0.401217	0.223373			Arrb1	0.285624	0.234568
	Arrb2	-0.319007	0.532581			Arrb2	-0.378972	0.409865
	Arrdc1	-0.103468	0.0486791			Arrdc1	1.04934	0.361812
	Arsb	-1.2863	0.703883			Arsb	0.808442	0.169418
	Art2b					Art2b
	Art4					Art4
	Arv1	0.424027	0.477106			Arv1
	As3mt	-0.629011	0.913125			As3mt	0.129149	0.0449777
	Asah1	-0.430657	0.240308			Asah1	1.10652	0.596677
	Asap1	-1.24931	0.986115			Asap1	0.259925	0.247215
	Asap3	0.408058	0.205688			Asap3
	Asb3	-1.07231	1.10312			Asb3	1.0831	0.909591
	Asb6	-0.759015	1.62397			Asb6	-1.13469	1.31568
	Ascc1	0.32964	0.224695			Ascc1	-1.31958	0.443583
	Ascc2	0.00807551	0.00992394			Ascc2	-0.620167	0.835044
	Ascc3	-0.115769	0.156244			Ascc3	-0.314322	0.396292
	Asf1a	-0.544256	1.33293			Asf1a	0.0114049	0.00652145
	Asf1b	0.100144	0.0795349			Asf1b	-1.81188	0.699884
	Ash2l	-0.184196	0.261748			Ash2l	-0.141346	0.16969
	Asl	-0.30846	0.385826			Asl	-0.061732	0.0619711
	Asna1	-0.211305	0.423841			Asna1	-0.323542	0.339489
	Asns	-0.645162	0.868254			Asns	-0.227542	0.122724
	Asnsd1	0.0948211	0.0769968			Asnsd1	-0.200148	0.232194
	Asph					Asph
	Aspscr1	-0.34458	0.71735			Aspscr1	-0.285855	0.360908
	Asrgl1	-0.545616	0.888655			Asrgl1	-0.015827	0.0106749
	Ass1	-0.730777	1.07408			Ass1	-0.495348	0.657891
	Asun	-0.654143	1.14297			Asun	-0.516042	0.729018
	Asxl1					Asxl1
	Asxl2	-2.67656	1.43538			Asxl2	1.66005	0.68646
	Atad1	-0.123755	0.251001			Atad1	-0.328448	0.476988
	Atad2	-0.211635	0.215182			Atad2	-0.568694	0.59104
	Atad2b	0.161009	0.224494			Atad2b	0.228236	0.303051
	Atad3	-0.306801	0.613466			Atad3	-0.219227	0.278601
	Atad5	-0.158835	0.206968			Atad5	-0.188882	0.147645
	Ate1	-0.0368616	0.0586608			Ate1	-0.729101	0.677232
	Ate1	-0.562882	0.951859			Ate1	-0.607565	0.752722
	Atf1	-0.356636	0.357659			Atf1	-0.331358	0.208849
	Atf2	-1.829	2.25516			Atf2	-0.0327007	0.0319716
	Atf7	-1.1368	0.908776			Atf7	-1.76888	1.52935
	Atf7ip	-0.218597	0.377558			Atf7ip	-0.0957296	0.0580696
	Atg101	-0.657871	0.236321			Atg101
	Atg13					Atg13	4.7641	2.97185
	Atg14					Atg14
	Atg16l1	-0.692795	1.72433			Atg16l1	-0.232674	0.317515
	Atg16l2	-1.711	0.829858			Atg16l2	0.191393	0.149846
	Atg2a	0.125169	0.0769928			Atg2a	0.766442	0.55916
	Atg2b	-0.374191	0.87847			Atg2b	-0.100257	0.115238
	Atg3	-0.121096	0.243237			Atg3	0.113252	0.133482
	Atg4a	-0.239947	0.218616			Atg4a	0.658699	0.600258
	Atg4b	-0.256478	0.315601			Atg4b	0.108391	0.090844
	Atg5	-0.17547	0.224066			Atg5	-0.276608	0.191876
	Atg7	-0.114282	0.0938768			Atg7	-0.409423	0.570775
	Athl1					Athl1	0.943119	0.615527
	Atic	-0.26593	0.613042			Atic	-0.241229	0.289062
	Atl2	-0.282699	0.614333			Atl2	-0.16139	0.173448
	Atl3	0.0875231	0.130513			Atl3	0.070971	0.0700943
	Atm	-0.244924	0.428969			Atm	0.351619	0.344927
	Atn1	-0.515216	0.602693			Atn1	0.130375	0.11026
	Atox1	-0.650814	0.549961			Atox1	-0.320283	0.2354
	Atp11b	0.125036	0.251617			Atp11b	-0.167987	0.161347
	Atp11c	0.144115	0.131166			Atp11c	0.116345	0.138145
	Atp13a1	-0.238636	0.567417			Atp13a1	0.400751	0.60205
	Atp13a3	-0.0780609	0.148792			Atp13a3	-0.86894	1.04813
	Atp1a1	-0.142904	0.282028			Atp1a1	-0.104172	0.124277
	Atp1b1	0.102166	0.122315			Atp1b1	0.365711	0.488247
	Atp1b3	-0.329051	0.678934			Atp1b3	-0.283138	0.358906
	Atp2a2	-0.0583755	0.104562			Atp2a2	-0.456608	0.679022
	Atp2a3	-0.381675	0.878912			Atp2a3	-0.0726078	0.0787002
	Atp2b1	0.546934	1.4479			Atp2b1	0.00617025	0.00549755
	Atp2b4	-0.514749	0.663404			Atp2b4	-0.703426	0.450443
	Atp2c1	0.217347	0.125496			Atp2c1	-0.108533	0.0554233
	Atp5a1	-0.111335	0.228136			Atp5a1	-0.193311	0.243584
	Atp5b	-0.356498	0.777287			Atp5b	-0.117164	0.142394
	Atp5c1	-0.268715	0.506606			Atp5c1	-0.427975	0.508175
	Atp5d	-0.533585	0.517909			Atp5d	-0.1293	0.0954099
	Atp5f1	0.261997	0.402749			Atp5f1	-0.540707	0.889879
	Atp5h	-1.07814	0.698877			Atp5h	-0.138877	0.11492
	Atp5i	-2.1716	0.775416			Atp5i	-0.433206	0.438176
	Atp5j	-2.39472	1.39919			Atp5j	-0.210451	0.20657
	Atp5j2	-0.559048	0.284843			Atp5j2	1.42528	0.948193
	Atp5l	-0.31906	0.31613			Atp5l	-0.1238	0.119139
	Atp5o	-0.256993	0.340026			Atp5o	-0.519986	0.436012
	Atp6ap1	-0.609508	0.805227			Atp6ap1	-0.686563	1.03834
	Atp6ap2	-0.57737	0.48959			Atp6ap2	0.114435	0.096644
	Atp6v0a1	-1.02927	0.727195			Atp6v0a1	-0.0890124	0.0691374
	Atp6v0a2	0.399339	0.267335			Atp6v0a2	-0.729271	0.793854
	Atp6v0c	-0.974844	0.674278			Atp6v0c	-1.24085	0.687756
	Atp6v0d1	0.599768	0.504085			Atp6v0d1	-0.062372	0.0706923
	Atp6v1a	-0.0163047	0.0219486			Atp6v1a	-0.351436	0.352917
	Atp6v1b2	0.0375494	0.0509962			Atp6v1b2	-0.21346	0.284176
	Atp6v1c1	0.463893	0.837399			Atp6v1c1	0.154526	0.110417
	Atp6v1d	0.0249902	0.0234019			Atp6v1d	-0.162182	0.178883
	Atp6v1e1	-0.438917	0.632605			Atp6v1e1	-0.0763975	0.0908303
	Atp6v1f	-0.334623	0.212895			Atp6v1f	-0.207633	0.176474
	Atp6v1g1	0.772112	0.292373			Atp6v1g1	-1.26186	0.485002
	Atp6v1h	-0.0719408	0.0619567			Atp6v1h	-0.187702	0.202679
	Atp7a	-6.60443	2.21995			Atp7a	2.05615	1.04793
	Atp8a1					Atp8a1	-0.0489616	0.0329504
	Atp8b2	0.655589	0.649216			Atp8b2	-0.359744	0.218929
	Atp8b4	-1.8337	1.09193			Atp8b4	-0.330715	0.152779
	Atp9b	-0.604119	0.325501			Atp9b	0.012471	0.00633808
	Atpaf1	-0.52347	1.17881			Atpaf1	0.752963	1.35972
	Atpaf2	-1.10265	2.48663			Atpaf2	-1.53678	0.782339
	Atpif1	0.0794657	0.0694041			Atpif1	2.71459	1.18024
	Atr	0.201913	0.230093			Atr	0.315561	0.420379
	Atrip	-0.802683	1.28036			Atrip	-0.891022	0.332301
	Atrn	2.6374	0.932315			Atrn	-0.535037	0.328615
	Atrx	-0.229025	0.451594			Atrx	-0.217373	0.240989
	Atxn1	0.698686	0.256257			Atxn1
	Atxn10	-0.303143	0.584151			Atxn10	-0.0361764	0.0324726
	Atxn1l					Atxn1l	-0.0454567	0.0281927
	Atxn2	-0.38372	0.438651			Atxn2	0.168531	0.125561
	Atxn2l	-0.49136	0.943909			Atxn2l	-0.527467	0.69647
	Atxn3	-1.34116	3.24159			Atxn3	0.383112	0.293356
	Atxn7l2	0.534243	0.162875			Atxn7l2	-0.910604	0.755039
	Atxn7l3	-0.737727	0.24903			Atxn7l3	-0.35397	0.296396
	AU019823	-0.743663	0.891994			AU019823	-0.18418	0.146433
	Auh	-0.523005	0.787367			Auh	-0.414119	0.471721
	Aunip	-0.144	0.0762551			Aunip
	Aup1	0.221951	0.123934			Aup1	0.889568	0.619786
	Aurka	-0.443379	1.03865			Aurka	-2.30514	2.26038
	Aurkaip1	0.5218	0.365122			Aurkaip1
	Aurkb	-0.356854	0.529324			Aurkb	-1.04392	1.35601
	Aven	-0.25691	0.448074			Aven	-0.348261	0.47395
	Avl9	-0.833625	0.786048			Avl9	-0.11457	0.0776446
	Axin1	-1.08219	1.60813			Axin1	-0.73954	0.472545
	Azi2	-2.11115	0.680257			Azi2	1.67291	2.11514
	B2m	0.0921741	0.0277943			B2m	-0.678691	0.159991
	B3galnt2					B3galnt2
	B3galt4					B3galt4
	B3galt6	0.644377	0.139892			B3galt6	-0.280361	0.307477
	B3galtl	-0.619381	0.7382			B3galtl
	B3gat3	-1.20374	1.10383			B3gat3
	B3GNT2	-0.298956	0.361834			B3GNT2	-0.601216	0.390383
	B4galnt1	-0.10163	0.157636			B4galnt1	-0.407593	0.559628
	B4galt1	-0.448306	0.5306			B4galt1	-0.77666	0.637443
	Babam1	0.155475	0.14588			Babam1	0.0363231	0.0348558
	Bach1					Bach1
	Bach2	-0.232556	0.261114			Bach2	-0.548489	0.576757
	Bag1	0.10745	0.0980082			Bag1	-0.329229	0.399908
	Bag2	-0.509519	0.775309			Bag2	-0.982147	0.561505
	Bag5	-0.475193	0.513836			Bag5	0.760682	0.558641
	Bag6	-0.684135	0.966979			Bag6	-0.494306	0.471252
	Bahd1	-3.15048	2.31055			Bahd1	-0.209066	0.125924
	Baiap2	0.0856962	0.0367787			Baiap2	-1.74141	1.44203
	Bak1	0.0179695	0.00814541			Bak1	-0.657335	0.338436
	Banf1	-1.69439	1.69357			Banf1	-1.3528	1.79414
	Banp	0.435572	0.439523			Banp	0.137599	0.0580051
	Bap1	-0.608736	0.266782			Bap1	-0.221358	0.160312
	Bap18	-0.971569	1.17254			Bap18	0.514073	0.32328
	Bard1	-1.0385	1.75246			Bard1	-2.03542	0.986994
	Basp1					Basp1
	Batf	-1.02064	1.40246			Batf	-0.592103	0.65451
	Bax	0.0659078	0.0817708			Bax	-0.315225	0.363565
	Baz1a	-0.530528	1.32322			Baz1a	-0.32829	0.418523
	Baz1b	-0.196924	0.395861			Baz1b	-0.401903	0.469134
	Baz2a	-0.590871	0.860339			Baz2a	-0.23567	0.24577
	Baz2b	2.21666	1.33113			Baz2b
	Bbx	0.426876	0.457034			Bbx	1.0039	1.15505
	BC027231	-0.0815317	0.0582578			BC027231	-0.139133	0.12209
	Bcap29	-0.518118	0.275455			Bcap29	0.477724	0.261965
	Bcap31	0.015393	0.0200082			Bcap31	-0.696021	0.731281
	Bcas2	-0.99038	0.779847			Bcas2	-0.143595	0.115481
	Bcas3	0.00779337	0.00455767			Bcas3	0.0391603	0.0323723
	Bcat1	-0.252488	0.335711			Bcat1	-0.739237	0.789912
	Bcat2	-0.358784	0.544479			Bcat2	-0.582244	0.705522
	Bccip	-0.50588	1.15591			Bccip	-0.42782	0.577121
	Bcdin3d					Bcdin3d	-1.39712	1.05626
	Bckdha	0.535474	0.741259			Bckdha	2.14765	1.35882
	Bckdhb	0.307929	0.230076			Bckdhb	0.18499	0.201082
	Bckdk	-1.86146	1.4026			Bckdk	1.1678	0.930252
	Bcl10	-0.71265	0.481477			Bcl10
	Bcl11b	-0.370413	0.429061			Bcl11b	-0.283042	0.231962
	Bcl2	-0.0699925	0.0297259			Bcl2	0.221809	0.245567
	Bcl2a1	0.527037	0.242184			Bcl2a1	-0.189102	0.261518
	Bcl2l1	-0.198867	0.283642			Bcl2l1	0.468643	0.54698
	Bcl2l11	-0.242168	0.0476445			Bcl2l11	-0.622888	0.390124
	Bcl2l13	-0.531386	1.14755			Bcl2l13	0.360806	0.22046
	Bcl7a					Bcl7a	-0.279073	0.157871
	Bcl7b	-0.0264472	0.014649			Bcl7b	-0.632608	0.881053
	Bcl7c	-0.770922	0.521031			Bcl7c	-1.4566	0.589323
	Bclaf1	-0.268004	0.534363			Bclaf1	-0.411683	0.444032
	Bcor	-0.978148	0.787836			Bcor	-0.0067068	0.00586709
	Bcr	-0.215163	0.0700486			Bcr	-0.752329	0.402784
	Bcs1l	-0.319594	0.456988			Bcs1l	-0.210058	0.26692
	Bdh1	-0.0839091	0.114509			Bdh1	-0.0114733	0.0104745
	Bdp1	-1.45566	1.13047			Bdp1	-0.192674	0.064386
	Becn1	-0.138036	0.24444			Becn1	-0.283901	0.335854
	Bend3	-0.380633	0.574365			Bend3	0.333302	0.386028
	Bet1	-0.984597	0.243165			Bet1	-2.54932	1.75962
	Bet1l	-1.29558	1.38193			Bet1l	-2.04237	1.27855
	Bfar	-0.423474	0.595957			Bfar	1.48876	1.54226
	Bhlhb9	-0.659778	0.15837			Bhlhb9	-3.53856	1.35133
	Bhlhe40	-2.06136	0.702204			Bhlhe40	-0.27198	0.218438
	Bicd2	-0.172711	0.264513			Bicd2	-0.262207	0.311207
	Bid	0.0454595	0.0205396			Bid	0.666696	0.284249
	Bin1	0.141869	0.224075			Bin1	-0.0937927	0.0958631
	Bin2	-0.136708	0.298664			Bin2	-0.411759	0.454073
	Birc2	-0.200467	0.150935			Birc2	-0.597003	0.669886
	Birc5					Birc5
	Birc6	-0.212318	0.367865			Birc6	-0.319057	0.331379
	Bles03	0.222411	0.127877			Bles03	2.57754	2.20067
	Blm	-0.447806	1.02894			Blm	-0.456155	0.472068
	Blmh	-0.162997	0.303124			Blmh	-0.243627	0.298805
	Bloc1s1	-0.857622	0.690226			Bloc1s1
	Bloc1s3	0.0140261	0.00886708			Bloc1s3	0.635714	0.236045
	Bloc1s4	1.09209	1.18134			Bloc1s4	-1.09737	0.438272
	Bloc1s6					Bloc1s6
	Blvra	-0.116973	0.21723			Blvra	-0.22142	0.187117
	Blvrb	2.22468	1.03681			Blvrb	-0.0931891	0.0423463
	Blzf1	-0.485386	0.645443			Blzf1	-0.286395	0.155715
	Bmi1	0.276019	0.265312			Bmi1	0.634957	0.464082
	Bmp2k	0.0962855	0.0756823			Bmp2k	-0.0820367	0.0662706
	Bms1	-0.415672	0.897768			Bms1	-0.246334	0.297972
	Bnip1	-0.038531	0.0595842			Bnip1	-0.059759	0.0483691
	Bnip2					Bnip2	1.59533	1.30096
	Bnip3l	0.327234	0.207995			Bnip3l	1.74605	2.1072
	Bod1l	0.0458937	0.0541517			Bod1l	0.0724114	0.0720792
	Bola1	-0.364123	0.173021			Bola1
	Bola2	-0.618461	0.298201			Bola2	-1.33152	1.35884
	Bola3	-1.92882	2.09223			Bola3	-0.166526	0.116351
	Bop1	-0.49445	1.24764			Bop1	-0.513477	0.768039
	Bora	-1.12897	1.4382			Bora	-1.02632	0.70682
	Bpgm					Bpgm
	Bphl	-1.3928	0.747277			Bphl	-0.129178	0.141592
	Bpnt1	-0.741195	1.14124			Bpnt1	-0.326141	0.289386
	Bptf	-0.0036143	0.0031556			Bptf	0.123266	0.110169
	Braf	-0.881606	0.763435			Braf	-0.708323	0.725158
	Brap	-0.204601	0.276405			Brap	-0.324729	0.37027
	Brat1	-0.20363	0.279531			Brat1	-0.574454	0.815484
	Brca1	-1.12791	1.10602			Brca1	-0.766948	0.475895
	Brca2	-1.15464	2.00347			Brca2	-0.293186	0.137466
	Brcc3	-0.0447591	0.0573155			Brcc3	-0.382462	0.557828
	Brd1					Brd1	-1.03452	1.80172
	Brd1	-0.213577	0.180326			Brd1
	Brd2	-0.304641	0.683784			Brd2	-0.485574	0.719865
	Brd3	-0.598442	0.748077			Brd3	-3.39e-06	2.7605e-06
	Brd4	-0.377025	0.546008			Brd4	-0.246808	0.305323
	Brd7	-0.488061	0.66832			Brd7	-0.543479	0.691829
	Brd8	-0.786695	1.31459			Brd8	0.783575	0.763943
	Brd9	0.245701	0.337265			Brd9	0.0444171	0.0415697
	Bre	-0.279335	0.488228			Bre	-0.849336	0.917654
	Brf1	-0.257882	0.187808			Brf1	-0.0587214	0.0582929
	Bri3bp	-0.145043	0.125535			Bri3bp	-0.312505	0.13128
	Brip1	-0.472241	0.705495			Brip1	-0.266281	0.220975
	Brix1	-0.95286	0.979555			Brix1	-0.440075	0.636305
	Brms1	-0.213116	0.0866667			Brms1	-0.0378118	0.0251859
	Brms1l	-0.08118	0.0397864			Brms1l	-0.0401498	0.0386432
	Brox	-0.712448	1.02026			Brox	0.716399	0.569821
	Brpf1	0.0075698	0.00763406			Brpf1	-0.354687	0.368463
	Brpf3					Brpf3	0.131574	0.0747604
	Brsk1					Brsk1
	Brsk2					Brsk2
	Brwd1	-0.797652	0.233979			Brwd1	0.132791	0.0378838
	Brwd3					Brwd3
	Bsdc1	-0.109896	0.0756994			Bsdc1	-0.211646	0.116374
	Bsg	-0.533988	0.828969			Bsg	-0.247085	0.249661
	Bsn	2.04831	1.26253			Bsn
	Bst2	-0.289394	0.365802			Bst2	-0.426951	0.443436
	Btaf1	-0.437808	1.03238			Btaf1	-0.582287	0.836122
	Btbd1	-0.0720113	0.0668531			Btbd1	-0.203487	0.188366
	Btbd10					Btbd10	-0.214333	0.153475
	Btbd11	-0.0510185	0.0157968			Btbd11
	Btbd9	-1.43392	1.47944			Btbd9	-0.217494	0.119898
	Btf3	0.0351273	0.0488278			Btf3	-0.411868	0.607698
	Btf3l4	-0.0971365	0.158784			Btf3l4	0.180987	0.232311
	Btla	-1.28126	1.0426			Btla	-0.676336	0.453884
	Bub1	-0.0005865	0.00088376			Bub1	-1.14197	1.5557
	Bub1b	-0.0943533	0.116605			Bub1b	-0.387763	0.517124
	Bub3	-0.253298	0.552077			Bub3	-0.332083	0.452833
	Bud13	-0.0575506	0.057622			Bud13	-0.82731	0.755344
	Bud31	0.14652	0.20247			Bud31	-0.110009	0.129811
	Bysl	-0.704234	1.44046			Bysl	-0.528602	0.869705
	Bzw1	-0.0127268	0.0221534			Bzw1	-0.353649	0.44476
	Bzw2	-0.228934	0.420011			Bzw2	-0.529051	0.55794
	C1galt1	-0.790768	0.294483			C1galt1	0.0412189	0.0283336
	C1galt1c1	0.267354	0.151728			C1galt1c1	-0.744032	0.315406
	C1qbp	-0.347919	0.652399			C1qbp	-0.21626	0.258841
	C2cd2l	3.40636	1.88634			C2cd2l	0.474326	0.32123
	C2cd3	0.88636	0.245645			C2cd3	-1.14312	0.341902
	C2cd5	-1.14696	1.57077			C2cd5	0.187931	0.213788
	Ca2	0.0247522	0.0188963			Ca2	1.02512	1.26842
	Caap1	0.326798	0.292616			Caap1	-0.459554	0.273366
	Cab39	-0.13136	0.248539			Cab39	-0.277297	0.341671
	Cab39l	-0.104669	0.115778			Cab39l	0.294874	0.187466
	Cabin1	0.582976	0.360875			Cabin1	0.914564	0.224869
	Cables2					Cables2	-0.505673	0.653928
	Cactin	-0.489908	0.757159			Cactin	-0.236259	0.242035
	Cacul1	-0.731522	0.407706			Cacul1	1.31286	1.55083
	Cacybp	-0.45806	0.995485			Cacybp	-0.425256	0.486977
	Cad	-0.130941	0.23206			Cad	-0.408802	0.523768
	Calcoco1					Calcoco1	3.70174	0.783507
	Calcrl	-0.35412	0.375882			Calcrl	0.200887	0.212197
	Calr	-0.522888	1.09871			Calr	-0.412669	0.487342
	Calu	-0.243183	0.451707			Calu	-0.196738	0.261433
	Camk1d	-0.532706	0.619621			Camk1d	-0.495756	0.448339
	Camk2d	0.34394	0.74757			Camk2d	0.715785	1.2878
	Camk2g	-0.183201	0.262051			Camk2g	-0.281776	0.396181
	Camk4	-0.176867	0.330146			Camk4	-0.443433	0.607184
	Camkk2	0.216702	0.167809			Camkk2	-0.208711	0.153436
	Camsap1	-0.019059	0.0193075			Camsap1	-1.00118	0.813774
	Camsap2	-0.175625	0.190979			Camsap2	-0.343519	0.195355
	Cand1	-0.141932	0.2859			Cand1	-0.290821	0.411121
	Cand2	0.0688846	0.04948			Cand2	0.351158	0.431487
	Cant1	0.0515572	0.0394299			Cant1	1.47667	1.12611
	Canx	-0.443037	0.923831			Canx	-0.357328	0.492224
	Cap1	-0.0681198	0.120091			Cap1	-0.169434	0.169273
	Cap2	0.19775	0.187136			Cap2
	Capg	0.700013	1.07274			Capg	0.267363	0.258643
	Capn1	0.169353	0.180996			Capn1	0.0931479	0.10064
	Capn15	-0.711016	0.380718			Capn15	-0.0084345	0.00357773
	Capn2	-0.522278	0.690101			Capn2	-0.224595	0.237822
	Capn7	-0.363977	0.767213			Capn7	0.162664	0.201463
	Capns1	-0.174612	0.331113			Capns1	0.271797	0.270455
	Caprin1	-0.0934544	0.127238			Caprin1	-0.345087	0.315503
	Capza1	-0.394544	0.918734			Capza1	-0.249886	0.338052
	Capza2	0.0388218	0.0503005			Capza2	-0.119837	0.126019
	Capzb	-0.0144001	0.0234136			Capzb	-0.133509	0.165216
	Card11	0.363674	0.154373			Card11	-0.0481801	0.0370449
	Card6	-2.14917	0.216609			Card6
	Carhsp1	-0.385989	0.378624			Carhsp1	0.0468357	0.0244622
	Carkd	-0.711925	0.785154			Carkd	0.875634	0.506616
	Carm1	0.100421	0.142081			Carm1	-0.10139	0.126019
	Cars	-0.201514	0.455518			Cars	-0.579871	0.962323
	Cars2	0.232352	0.29731			Cars2	-0.683226	0.998711
	Casc3	-0.200036	0.210976			Casc3	0.405089	0.377908
	Casc4	-2.29319	2.14165			Casc4	-0.271447	0.164145
	Casc5	-1.03976	1.12405			Casc5	-1.38732	1.51454
	Casd1					Casd1
	Casp1					Casp1	0.840611	0.931279
	Casp2	-0.183835	0.2153			Casp2	-0.0285912	0.0229385
	Casp3	-0.0798198	0.104209			Casp3	-0.221364	0.242782
	Casp6	-0.839663	0.89837			Casp6	-0.332475	0.469366
	Casp7	-0.0991206	0.0768883			Casp7	0.108145	0.0327634
	Casp8	-0.259625	0.429808			Casp8	-0.14089	0.143709
	Casp8ap2	-0.632997	0.883897			Casp8ap2	-0.486126	0.19789
	Casp9					Casp9
	Cast	-0.0055197	0.00817981			Cast	0.108613	0.109646
	Cat	-0.273529	0.493667			Cat	0.183618	0.165234
	Cbfb	3.23765	0.64942			Cbfb	-0.0700044	0.0750485
	Cbfb	-0.493529	1.27012			Cbfb	0.0826834	0.019351
	Cbl	-0.0290226	0.0294879			Cbl	-0.242245	0.276092
	Cblb	-0.0943302	0.158454			Cblb	-0.20113	0.208037
	Cbll1	-0.625759	1.17082			Cbll1	0.0801302	0.0557254
	Cbr1	-0.33461	0.693966			Cbr1	0.208147	0.227801
	Cbr4	0.431176	0.424391			Cbr4	0.190501	0.213239
	Cbwd1	-0.300328	0.193866			Cbwd1	0.222914	0.133072
	Cbx1	-0.22912	0.480328			Cbx1	-0.388996	0.426303
	Cbx2	0.1567	0.104727			Cbx2	0.309923	0.404277
	Cbx3	-0.152461	0.311316			Cbx3	-0.0068154	0.00747518
	Cbx4	-0.491032	0.868207			Cbx4	-0.15265	0.134017
	Cbx5	-0.497659	0.941099			Cbx5	0.176363	0.183377
	Cbx6	0.324688	0.260311			Cbx6	0.742849	0.668729
	Cbx7					Cbx7	1.79807	1.14976
	Cbx8	-1.02376	1.48724			Cbx8	-0.730984	0.990539
	Cc2d1a	-0.117045	0.183194			Cc2d1a	-0.183143	0.191951
	Cc2d1b	-0.368597	0.551988			Cc2d1b	0.0775138	0.0827772
	Ccar1	-0.255198	0.501772			Ccar1	-0.438108	0.423543
	Ccar2	-0.326766	0.685449			Ccar2	-0.113229	0.122711
	Ccbl1	-0.630049	1.2245			Ccbl1	0.783065	1.1608
	Ccbl2	-0.857416	1.99415			Ccbl2	-0.194955	0.235206
	Ccdc101	-0.757152	1.33343			Ccdc101	-0.254983	0.357023
	Ccdc102a	-2.05503	0.719498			Ccdc102a
	Ccdc109b					Ccdc109b	-0.735066	0.284461
	Ccdc115	-1.74858	1.02268			Ccdc115	-1.59444	0.839385
	Ccdc117	-1.35765	0.935182			Ccdc117	-0.356225	0.123241
	Ccdc12	-0.0511311	0.0844211			Ccdc12	0.109637	0.117816
	Ccdc124	-0.326797	0.383195			Ccdc124	-0.0504174	0.0448251
	Ccdc127	0.121468	0.085332			Ccdc127	1.31562	0.931837
	Ccdc130	-0.17248	0.111592			Ccdc130
	Ccdc132	-0.390239	0.375447			Ccdc132	-0.567528	0.731411
	Ccdc134	0.221793	0.180244			Ccdc134	0.125685	0.10477
	Ccdc137	-0.884053	1.0857			Ccdc137	-0.681612	1.18903
	Ccdc14	0.0545184	0.0314795			Ccdc14
	Ccdc146	-0.18398	0.104547			Ccdc146	-1.84148	1.78344
	Ccdc15	-0.39186	0.216555			Ccdc15	0.042321	0.0170755
	Ccdc167	0.244364	0.0612316			Ccdc167	0.0212895	0.0101326
	Ccdc174	-0.362903	0.359018			Ccdc174	-0.368953	0.495372
	Ccdc22	-0.526288	1.0272			Ccdc22	-0.372215	0.426623
	Ccdc25	-0.0230174	0.0164212			Ccdc25	-0.420069	0.675257
	Ccdc43	-0.643697	1.19256			Ccdc43	-0.229587	0.28179
	Ccdc47	-0.0682895	0.106545			Ccdc47	-0.501629	0.790238
	Ccdc50	-0.33197	0.763439			Ccdc50	-0.248836	0.198843
	Ccdc51	-0.692264	1.31426			Ccdc51	-0.330751	0.44099
	Ccdc53	0.580616	0.564575			Ccdc53	0.456485	0.613249
	Ccdc58	-0.556379	0.398345			Ccdc58	-0.466177	0.421791
	Ccdc59	-0.646673	0.835807			Ccdc59	-0.412666	0.265652
	Ccdc6	0.0128392	0.00994645			Ccdc6	-0.56553	0.446726
	Ccdc61	-0.577309	0.407044			Ccdc61	0.0773933	0.0427104
	Ccdc64	-1.66253	0.960132			Ccdc64	-1.11913	0.927377
	Ccdc69	0.242186	0.119836			Ccdc69	0.0875008	0.0428606
	Ccdc71	-0.0111729	0.00640296			Ccdc71
	Ccdc71l	-0.312376	0.255886			Ccdc71l	1.8658	1.18648
	Ccdc77					Ccdc77
	Ccdc82	-1.04499	0.83847			Ccdc82	0.449221	0.292848
	Ccdc85c	0.0913482	0.0684788			Ccdc85c
	Ccdc86	-0.396883	0.971505			Ccdc86	-0.810726	1.11871
	Ccdc88b	-0.59743	0.847688			Ccdc88b	-0.315257	0.287222
	Ccdc88c	-0.545959	1.4831			Ccdc88c	-1.14394	1.85951
	Ccdc9	-0.371063	0.622612			Ccdc9	-0.295245	0.239282
	Ccdc90b	-1.20447	0.566675			Ccdc90b	-1.18557	0.652027
	Ccdc91	-0.688498	0.721088			Ccdc91	0.684395	0.616799
	Ccdc92					Ccdc92
	Ccdc93	0.175675	0.371841			Ccdc93	-0.557376	0.83881
	Ccdc94	-0.616561	0.861109			Ccdc94	-0.136123	0.0982072
	Ccdc97	-0.200982	0.21013			Ccdc97	-0.692152	0.768322
	Cchcr1					Cchcr1	-0.262353	0.147411
	Ccm2	0.311691	0.515047			Ccm2	0.176578	0.195064
	Ccna2	-0.986518	1.70617			Ccna2	0.0334493	0.016071
	Ccnb1	-0.595466	1.084			Ccnb1	-1.22676	1.96478
	Ccnb2	1.85011	0.59313			Ccnb2
	Ccnc	-0.3498	0.458161			Ccnc	1.78884	0.877618
	Ccnd2	0.651669	0.838131			Ccnd2	0.50766	0.479059
	Ccnd3	0.292813	0.267899			Ccnd3	0.199626	0.124506
	Ccne1	0.24629	0.334948			Ccne1	-0.607089	0.227063
	Ccne2	-0.926373	0.443104			Ccne2	-1.25374	1.19276
	Ccnh	-0.0768603	0.119974			Ccnh	-0.436492	0.571271
	Ccnk	-0.47996	0.74274			Ccnk	-0.115773	0.127689
	Ccnl1	-0.507529	0.663138			Ccnl1	0.148188	0.186335
	Ccnl2	0.544276	0.323245			Ccnl2	-0.0825327	0.0928164
	Ccnt1	-0.416099	0.816532			Ccnt1	-0.270406	0.393254
	Ccnt2	-0.36283	0.21701			Ccnt2	0.195879	0.106947
	Ccny	-0.366674	0.831143			Ccny	1.92809	1.36166
	Ccp110	-0.363388	0.516662			Ccp110	-1.20319	1.14362
	Ccr7	-0.142766	0.157034			Ccr7	-0.710393	0.797595
	Ccrn4l	-0.0799206	0.0885301			Ccrn4l	-0.582298	0.609264
	Ccs	-1.36275	1.22035			Ccs	0.350199	0.127064
	Ccsap	1.60106	1.60655			Ccsap	0.816338	0.526788
	Ccsmst1					Ccsmst1
	Cct2	-0.121177	0.232493			Cct2	-0.344702	0.431658
	Cct3	-0.269981	0.686861			Cct3	-0.355902	0.467594
	Cct4	-0.0669587	0.113834			Cct4	-0.375488	0.536119
	Cct5	-0.0942273	0.188302			Cct5	-0.316287	0.447374
	Cct6a	-0.0600369	0.113815			Cct6a	-0.227029	0.273977
	Cct6b	-0.680696	0.898605			Cct6b
	Cct7	0.00660142	0.0104892			Cct7	-0.534534	0.811963
	Cct8	-0.295774	0.703536			Cct8	-0.315423	0.451202
	Ccz1	-0.499933	1.04224			Ccz1	0.00701751	0.00648655
	Cd1d1;Cd1d2					Cd1d1;Cd1d2	-0.106261	0.0512251
	Cd2	-0.0069955	0.00571137			Cd2	0.146358	0.159042
	Cd200	-0.172701	0.192182			Cd200	-0.0122984	0.0129257
	Cd209b	-1.33554	0.400384			Cd209b	0.966993	0.440031
	Cd226	-0.288287	0.499684			Cd226	0.251403	0.118867
	Cd247	-0.140278	0.127107			Cd247	-0.114162	0.0843188
	Cd27	0.0676977	0.0324851			Cd27	-1.29511	0.851042
	Cd274	-0.0058249	0.00821236			Cd274	-0.0672352	0.071146
	Cd28	-1.3015	0.620503			Cd28	-0.779417	0.418116
	Cd2ap	-0.294743	0.509454			Cd2ap	-0.47507	0.670893
	Cd2bp2	-0.138245	0.213535			Cd2bp2	-0.840998	1.37962
	Cd37	0.524918	0.334674			Cd37	1.1178	0.960698
	Cd38					Cd38
	Cd3d	-0.385475	0.532083			Cd3d	-0.70492	0.615078
	Cd3e	-0.185568	0.393503			Cd3e	-0.109247	0.119175
	Cd3eap	-0.565974	1.06568			Cd3eap	-0.557698	0.891661
	Cd3g	0.314468	0.0889189			Cd3g	-0.343813	0.18058
	Cd4					Cd4	-0.252709	0.25573
	Cd40	-2.04316	1.00504			Cd40	0.64598	0.597136
	Cd44	-0.301017	0.439842			Cd44	-0.381683	0.47337
	Cd47	1.16713	0.744413			Cd47	-0.218023	0.147679
	Cd47	-0.612253	0.996665			Cd47	0.0504607	0.04515
	Cd48	-0.126033	0.178053			Cd48	-0.340455	0.314194
	Cd5	-0.886957	1.94184			Cd5	-0.23546	0.205279
	Cd55					Cd55	0.554518	0.342181
	Cd6	-0.42307	0.458769			Cd6	-0.657669	0.627567
	Cd69	-0.141093	0.232341			Cd69	-0.688812	0.743371
	Cd72	-0.0409103	0.0307751			Cd72	0.579732	0.359809
	Cd74	0.0679825	0.040351			Cd74	0.374768	0.26153
	Cd79a	-1.3094	0.840647			Cd79a
	Cd81					Cd81	1.37262	0.900117
	Cd82	0.594972	0.131397			Cd82	0.624046	0.513307
	Cd83					Cd83
	Cd84	2.75346	0.912395			Cd84	-1.60237	1.95919
	Cd86	-0.152936	0.0775181			Cd86
	Cd8a	-0.432925	0.380972			Cd8a
	Cd8b	-0.304559	0.36477			Cd8b	-1.39629	0.704308
	Cd9					Cd9	-0.426819	0.460674
	Cd96	0.0584275	0.0711255			Cd96	-0.598265	0.503397
	Cd97	-0.397979	0.673153			Cd97	-0.661623	0.988096
	Cdadc1					Cdadc1
	Cdan1	2.15109	3.56234			Cdan1	0.361551	0.106486
	Cdc123	-0.547436	1.01273			Cdc123	-0.0791624	0.0428776
	Cdc16	0.238845	0.473426			Cdc16	-0.247485	0.261257
	Cdc20	-0.486018	0.70655			Cdc20	-1.94437	1.31179
	Cdc23	-0.380905	0.576827			Cdc23	-0.651171	0.874438
	Cdc27	-0.638741	1.59318			Cdc27	-0.5777	0.927918
	Cdc34	-2.14013	0.755546			Cdc34	1.2556	0.521658
	Cdc37	-0.211449	0.412821			Cdc37	-0.111164	0.129544
	Cdc37l1	-0.240056	0.175084			Cdc37l1	-0.678461	0.440091
	Cdc40	0.0468006	0.082007			Cdc40	0.191739	0.23568
	Cdc42	0.0317425	0.0373308			Cdc42
	Cdc42	-0.128848	0.0791269			Cdc42	0.0155316	0.0175139
	Cdc42se2	-0.861317	1.74912			Cdc42se2	0.0181099	0.0125617
	Cdc45	-0.373025	0.764688			Cdc45	-0.128269	0.109068
	Cdc5l	-0.110017	0.19649			Cdc5l	-0.0806134	0.0748372
	Cdc6	-0.656158	0.762604			Cdc6	-2.68307	1.48278
	Cdc7	-0.713724	0.796422			Cdc7	-1.97652	1.91252
	Cdc73	0.191745	0.308904			Cdc73	-0.2562	0.357678
	Cdca2	-0.158191	0.21685			Cdca2	-1.06857	1.46669
	Cdca4	-0.789623	0.705924			Cdca4	-0.48391	0.305291
	Cdca5	-0.0987351	0.133579			Cdca5	-0.141324	0.0454222
	Cdca7	-0.182892	0.104475			Cdca7	-0.609883	0.494153
	Cdca7l	-0.607167	0.570694			Cdca7l	0.344042	0.216101
	Cdca8	0.0790783	0.104491			Cdca8	-1.19416	1.17738
	Cdh12	-2.08899	0.320611			Cdh12	1.74005	0.336108
	Cdipt	0.264982	0.367761			Cdipt	0.230303	0.289159
	Cdk1	-0.397234	0.70241			Cdk1	-0.0513334	0.045813
	Cdk10	-0.491707	0.419954			Cdk10	-1.43255	0.773087
	Cdk11b	-0.0380684	0.0482902			Cdk11b	-0.335452	0.461047
	Cdk12	-0.887776	1.9108			Cdk12	-0.0797409	0.0705772
	Cdk13	-0.239584	0.224709			Cdk13	-0.227375	0.239982
	Cdk17	-0.560926	0.871287			Cdk17	0.38881	0.615574
	Cdk19	-1.21582	1.51226			Cdk19	0.938768	0.610014
	Cdk2	-0.57175	0.769501			Cdk2	-0.385875	0.420875
	Cdk4	-0.48833	0.669502			Cdk4	-0.23461	0.136755
	Cdk5	-0.323609	0.630472			Cdk5	0.208615	0.208244
	Cdk5rap1	0.990501	0.744961			Cdk5rap1	-0.444381	0.42407
	Cdk5rap2	0.0179846	0.0113769			Cdk5rap2	-0.410521	0.312419
	Cdk5rap3	-0.0926857	0.112017			Cdk5rap3	-0.0017875	0.00160247
	Cdk6	-0.567831	0.643743			Cdk6	-0.415127	0.388295
	Cdk7	-0.529738	0.950423			Cdk7	-0.065064	0.0659611
	Cdk8	-0.590751	0.534664			Cdk8	-1.50164	0.919183
	Cdk9	-0.670749	0.92113			Cdk9	0.24109	0.175074
	Cdkal1	-0.414335	0.368705			Cdkal1	-0.941573	1.4502
	Cdkn1b					Cdkn1b	0.157153	0.128923
	Cdkn2aip	0.0718796	0.103051			Cdkn2aip	0.385358	0.404539
	Cdkn2aipnl	-0.210916	0.0566435			Cdkn2aipnl	0.696884	0.401208
	Cdpf1	-0.0243707	0.0194776			Cdpf1	-1.24939	0.821583
	Cds2	0.233762	0.404361			Cds2	-0.0557491	0.0628013
	Cdt1	-0.547178	0.914383			Cdt1	0.908019	0.735121
	Cdv3	-0.270261	0.465197			Cdv3	-0.218564	0.287875
	Cdyl	-0.290757	0.613297			Cdyl	-0.311016	0.307412
	Cdyl2	-0.133187	0.182037			Cdyl2	0.160401	0.155174
	Cebpg	-1.44157	1.0728			Cebpg	-0.259226	0.167779
	Cebpz	-0.926769	1.7379			Cebpz	-0.529225	0.830226
	Cecr5	0.131345	0.221251			Cecr5	0.378369	0.476766
	Celf1	-0.123002	0.1906			Celf1	-0.171947	0.194972
	Celf2	-0.330296	0.389016			Celf2	-0.151705	0.108002
	Cenpa	0.179253	0.251267			Cenpa	0.626457	0.569637
	Cenpc	0.19479	0.216609			Cenpc	-0.306956	0.356229
	Cenpe	-0.2188	0.137046			Cenpe	-0.918711	0.752293
	Cenpf	0.026992	0.0251586			Cenpf	-1.49903	0.770901
	Cenph	-2.74064	1.13024			Cenph	1.73602	0.84869
	Cenpi	-1.29116	0.789788			Cenpi
	Cenpj					Cenpj	-0.154637	0.101828
	Cenpk	-0.405152	0.329719			Cenpk
	Cenpl					Cenpl	-0.31271	0.179232
	Cenpm	-0.541312	1.00922			Cenpm	-1.17137	0.480483
	Cenpo	0.613359	0.965763			Cenpo
	Cenpp	0.561589	0.179631			Cenpp	0.247788	0.197071
	Cenpq	-2.09317	1.53691			Cenpq	-0.758325	0.595169
	Cenpt	-0.0995696	0.107533			Cenpt
	Cenpu	0.207545	0.109629			Cenpu	0.00886631	0.00372336
	Cenpv	-0.708571	0.68189			Cenpv	0.401907	0.254035
	Cep120	-0.368153	0.337918			Cep120	-0.263643	0.304892
	Cep128	-0.760823	0.440551			Cep128	1.05894	0.528604
	Cep135	0.250466	0.318257			Cep135	0.27538	0.264949
	Cep152	1.02988	0.290121			Cep152	3.32973	0.777053
	Cep164	1.29956	0.893211			Cep164
	Cep170	-0.430194	0.58391			Cep170	-0.350606	0.437542
	Cep170	0.035612	0.0298429			Cep170
	Cep192	-1.31131	1.4687			Cep192	-1.05236	1.30112
	Cep250	0.31492	0.308014			Cep250	-1.70117	1.83226
	Cep290	0.050665	0.0141142			Cep290	-0.611166	0.223593
	Cep295	0.814444	0.499725			Cep295	0.353275	0.178398
	Cep350	-0.204923	0.134137			Cep350	2.00616	0.970239
	Cep41	-0.0977655	0.133445			Cep41	-0.265453	0.272457
	Cep44	0.944262	1.28463			Cep44	0.312328	0.182399
	Cep55	0.375197	0.260974			Cep55	-2.06105	0.967526
	Cep57	-0.115947	0.142286			Cep57	0.0204818	0.0149598
	Cep57l1					Cep57l1
	Cep63	-0.87148	0.782558			Cep63	-1.86217	1.0583
	Cep68	-0.389229	0.486863			Cep68
	Cep72	-2.34448	1.62975			Cep72
	Cep76	-0.778048	1.22716			Cep76	-1.33596	2.29425
	Cep78	-1.13588	1.47455			Cep78	-0.924772	1.13823
	Cep83	-0.460386	0.491887			Cep83	-0.924717	0.614495
	Cep85	0.0953764	0.0737025			Cep85	-0.91596	0.302047
	Cep95	1.37475	0.669815			Cep95	-0.501795	0.185135
	Cep97	-0.682329	0.408581			Cep97	-0.802962	0.891436
	Cept1	-1.09687	1.0466			Cept1	-0.105417	0.0644974
	Cers2	-0.636115	0.828014			Cers2	-0.0343254	0.0206535
	Cers5	-0.550921	0.998494			Cers5	-1.00936	0.644267
	Cers6	-0.183114	0.193946			Cers6	-0.804213	0.925724
	Cetn2	-0.690906	0.971163			Cetn2	-0.128718	0.0832057
	Cetn3	-0.571128	0.891909			Cetn3	0.264064	0.155988
	Cfap20	-0.38689	0.867774			Cfap20	-1.08712	1.03963
	Cfap36	0.622261	0.473565			Cfap36	-0.341008	0.239581
	Cfap97	-0.3477	0.212899			Cfap97	-0.175294	0.0988615
	Cfdp1	-0.362252	0.67373			Cfdp1	-0.258327	0.314882
	Cfl1	-0.614076	0.907862			Cfl1	-0.241127	0.309977
	Cfl2	-0.821813	2.01388			Cfl2	0.742815	0.675244
	Cggbp1	0.508627	0.910124			Cggbp1	-0.122534	0.0890442
	Chac2	-1.35477	1.43825			Chac2	-0.635306	0.398875
	Chaf1a	-0.401235	0.782911			Chaf1a	-0.419277	0.381147
	Chaf1b	-0.590824	1.24221			Chaf1b	-0.873625	1.51042
	Champ1	0.194391	0.327317			Champ1	-0.264979	0.301667
	Chchd1	-0.329913	0.0950757			Chchd1
	Chchd3	-0.440313	0.924657			Chchd3	-0.470459	0.665581
	Chchd4	-0.555403	0.703161			Chchd4	-0.872482	1.36797
	Chchd6	-0.0165492	0.0122661			Chchd6	-1.10523	1.06653
	Chd1	0.0481344	0.0662535			Chd1	-0.35565	0.467757
	Chd1l	-0.35036	0.435734			Chd1l	-0.301623	0.331724
	Chd2	-0.475189	0.730395			Chd2	0.0414915	0.0377119
	Chd3	-0.0839373	0.0651677			Chd3	-0.0040129	0.00344666
	Chd4	-0.340777	0.844617			Chd4	-0.259516	0.3158
	Chd7	-2.40054	1.01391			Chd7	-1.79274	0.674534
	Chd8	-0.334578	0.520708			Chd8	-0.0082984	0.00755626
	Chd9					Chd9
	Chdh					Chdh	1.07476	0.811639
	Chek1	0.0129554	0.0183474			Chek1	-0.712215	1.0697
	Cherp	-0.0873887	0.170935			Cherp	-0.391578	0.392507
	Chfr	-0.845457	0.873662			Chfr
	Chid1	-0.140926	0.204976			Chid1	-0.207884	0.127237
	Chka	-0.814686	1.15926			Chka
	Chkb	-0.501012	0.431999			Chkb	-0.695311	0.372668
	Chm	-0.0133418	0.0121818			Chm	0.0808387	0.0625173
	Chmp1a	0.722426	0.522695			Chmp1a	0.269221	0.232572
	Chmp1b1	1.32034	3.08227			Chmp1b1	-1.48038	1.12431
	Chmp2a	0.747017	1.27322			Chmp2a	0.387445	0.428186
	Chmp2b	0.395644	0.879838			Chmp2b	1.62867	1.44878
	Chmp3	-0.701654	0.706956			Chmp3	-1.7578	2.69075
	Chmp4b	-1.03964	0.901991			Chmp4b	-0.0603377	0.0599958
	Chmp5	-0.125252	0.160285			Chmp5	1.10877	1.61485
	Chmp6	-0.0981205	0.0722719			Chmp6	0.432911	0.436187
	Chmp7	-0.150893	0.0870491			Chmp7	0.648019	0.527221
	Chn2					Chn2	0.211766	0.13685
	Chordc1	-0.151564	0.242257			Chordc1	-0.458614	0.638384
	Chp1	-0.920267	1.3026			Chp1	-0.578464	0.427143
	Chpf	1.02296	1.35124			Chpf
	Chpf2	0.575297	0.368168			Chpf2	-0.201414	0.0174933
	Chsy1	2.13447	2.2923			Chsy1
	Chtf18	0.141784	0.0929053			Chtf18	-2.33917	2.95603
	Chtf8					Chtf8
	Chtop	-0.15721	0.100036			Chtop	0.57811	0.456051
	Chuk	-0.405362	0.653506			Chuk	-0.401428	0.51575
	Churc1	-0.0855788	0.11786			Churc1	-0.821327	1.23931
	Ciao1	-0.476147	0.625716			Ciao1	0.0950548	0.0947815
	Ciapin1	-0.387665	0.271056			Ciapin1	-0.636011	0.390849
	Cib1	1.24236	0.385193			Cib1	-0.769699	0.848937
	Cic	-1.16781	1.21124			Cic	-0.220191	0.267151
	Cir1	0.860171	0.475987			Cir1	0.527933	0.556512
	Cirbp	-0.165986	0.290957			Cirbp	0.137998	0.128299
	Cirh1a	-0.493201	1.1168			Cirh1a	-0.656112	0.928654
	Cisd1	-1.31598	1.73392			Cisd1	-0.250673	0.12471
	Cisd2	-0.566263	0.9191			Cisd2	-0.164475	0.151686
	Cisd3	-1.87394	0.992985			Cisd3	-1.29419	1.15536
	Cish	0.434935	0.839302			Cish	0.132955	0.115035
	Cit	-0.345369	0.484182			Cit	-0.0827317	0.0701605
	Ciz1	0.0955364	0.0549887			Ciz1	0.0821261	0.0507733
	Ckap2	-0.995988	1.41192			Ckap2	-2.29935	0.873544
	Ckap2l	-1.46399	0.897942			Ckap2l	1.455	0.951064
	Ckap4	-2.81977	0.743562			Ckap4	-0.155046	0.0931352
	Ckap5	-0.136629	0.218077			Ckap5	-0.211778	0.199484
	Ckb	-0.642191	0.707129			Ckb	-0.23415	0.309126
	Cks1b	0.0462989	0.0211076			Cks1b
	Clasp1	-0.407208	0.74267			Clasp1	-0.180721	0.161994
	Clasp2	-0.0205823	0.0307288			Clasp2	-0.68105	0.308791
	Clasp2	0.0364004	0.0357127			Clasp2	-0.0279475	0.0276656
	Clasrp	0.781174	0.985721			Clasrp	0.493172	0.534609
	Clcc1	-0.843869	1.12715			Clcc1	-0.679118	1.01451
	Clcn3	-0.0276972	0.00817316			Clcn3	-1.43581	1.34554
	Clcn7	-0.428107	0.335363			Clcn7	-1.69562	0.564655
	Cldnd1	-0.603271	0.567873			Cldnd1	0.468012	0.482805
	Clec16a	-3.41642	0.50008			Clec16a	4.4277	0.841989
	Clec2d	0.357533	0.576742			Clec2d	0.346108	0.318865
	Clic1	-0.236027	0.390118			Clic1	-0.155191	0.184306
	Clic4	-0.513043	0.98814			Clic4	-0.268395	0.369356
	Clic5	-0.507866	1.00427			Clic5	-0.322057	0.274655
	Clint1	-0.394037	0.963584			Clint1	-0.378226	0.370159
	Clip1	-0.476772	0.928359			Clip1	-0.408835	0.406241
	Clip2					Clip2
	Clk1	-0.183836	0.168657			Clk1	-0.251691	0.178695
	Clk2	-0.739473	0.457238			Clk2	0.345875	0.235453
	Clk3	0.186701	0.117464			Clk3	0.177829	0.124218
	Cln6					Cln6	-2.87001	1.64904
	Cln8					Cln8	0.142545	0.140123
	Clns1a	-0.464837	1.04898			Clns1a	-0.576026	0.830848
	Clp1	-0.565078	0.788108			Clp1	0.206236	0.229726
	Clpb	-0.223384	0.321797			Clpb	-0.644399	0.825753
	Clpp	0.23849	0.259592			Clpp	-0.317635	0.30512
	Clptm1	-0.132507	0.191224			Clptm1	-0.279575	0.384855
	Clptm1l	-0.938396	1.76974			Clptm1l	0.551003	0.696104
	Clpx	0.100432	0.165274			Clpx	-0.25295	0.306911
	Clspn	-0.446529	0.721947			Clspn	-1.56295	1.785
	Clta	-1.08905	0.803006			Clta
	Cltb	-0.668839	0.631148			Cltb	-0.8398	0.845893
	Cltc	-0.374904	0.942988			Cltc	-0.383082	0.485635
	Clu					Clu	1.32286	0.868732
	Cluap1	-0.355595	0.249221			Cluap1	-1.64846	0.381783
	Cluh	-0.302122	0.570688			Cluh	-0.538727	0.669375
	Clybl	-0.437298	0.475306			Clybl	0.451408	0.421654
	Cma1					Cma1	-0.901334	0.820003
	Cmah	0.285877	0.309538			Cmah	0.552831	0.38581
	Cmas	-0.0773338	0.130281			Cmas	0.366597	0.44521
	Cmc1	-0.109985	0.0402254			Cmc1	0.734915	0.222109
	Cmc2	0.410445	0.437676			Cmc2	0.542571	0.211632
	Cmip	-0.750798	0.686647			Cmip	-0.530007	0.863413
	Cmpk1	-0.0583378	0.100426			Cmpk1	0.297951	0.406121
	Cmpk2	-0.11061	0.144236			Cmpk2	0.278608	0.330003
	Cmss1	-0.389152	0.783673			Cmss1	-0.35527	0.472745
	Cmtm6	-0.0307745	0.043652			Cmtm6	0.939007	0.923586
	Cmtm7	0.56476	0.350311			Cmtm7	0.14619	0.0930674
	Cmtr1	-0.230513	0.510481			Cmtr1	-0.0202738	0.0183849
	Cmtr2	0.0875302	0.0480129			Cmtr2	0.693145	0.751014
	Cnbp	-0.0890746	0.0968322			Cnbp	-0.37138	0.335101
	Cnbp	-0.331335	0.4641			Cnbp	-0.354826	0.253862
	Cndp2	-0.307173	0.532476			Cndp2	-0.118607	0.115715
	Cnep1r1	-0.890639	0.457003			Cnep1r1	-0.232655	0.132374
	Cnih1	-0.48265	0.382628			Cnih1	0.325888	0.18771
	Cnih4	-0.964856	1.58106			Cnih4	-0.039547	0.0196678
	Cnn2	-0.40198	0.770654			Cnn2	-0.274913	0.334191
	Cnn3	-0.167501	0.187763			Cnn3	-0.110469	0.0814497
	Cnnm3	-0.459715	0.648369			Cnnm3	-0.681182	0.332065
	Cnnm4	-0.227008	0.0569998			Cnnm4	-2.17379	0.440976
	Cnot1	-0.482326	1.18365			Cnot1	-0.914531	0.788495
	Cnot1	-0.43995	0.899669			Cnot1	-0.289793	0.362529
	Cnot10	-0.109143	0.229744			Cnot10	-0.204228	0.24074
	Cnot11	-0.086818	0.102553			Cnot11	0.00226503	0.00215842
	Cnot2	-0.39804	0.506855			Cnot2	0.278834	0.211048
	Cnot3	0.116457	0.134971			Cnot3	0.267943	0.344855
	Cnot4	-0.247563	0.111368			Cnot4	-1.00152	1.15282
	Cnot4	-0.530071	0.371382			Cnot4	0.546064	0.850599
	Cnot6	-0.0424941	0.0312886			Cnot6	0.937998	0.599264
	Cnot6l	-0.0971886	0.0856992			Cnot6l	-0.305379	0.240147
	Cnot7	-0.0905032	0.0742228			Cnot7	-0.626201	0.410372
	Cnot8	-0.279855	0.32878			Cnot8	0.153921	0.127958
	Cnp	0.068314	0.0929669			Cnp	0.160044	0.168325
	Cnpy2	-0.993857	2.09231			Cnpy2	-0.282334	0.359927
	Cnpy3	-0.199369	0.247283			Cnpy3	-0.282108	0.253023
	Cnpy4	-0.152951	0.100504			Cnpy4	-0.968464	0.760798
	Cnr2					Cnr2
	Cnst					Cnst	-0.477674	0.260585
	Cntrl	-1.08632	0.749762			Cntrl	-0.178869	0.0943217
	Cntrob					Cntrob
	Coa5					Coa5
	Coa7	-0.316835	0.453795			Coa7	0.00377683	0.00135113
	Coasy	-0.298749	0.731494			Coasy	-0.432119	0.45587
	Cobll1	3.26628	1.35269			Cobll1	-0.391578	0.230795
	Cog1	-0.082792	0.0973899			Cog1	-0.489441	0.678177
	Cog2	-0.0244327	0.0322436			Cog2	0.028796	0.0324631
	Cog3	-0.452505	0.614666			Cog3	-0.339137	0.415365
	Cog4	-0.62589	0.551757			Cog4	-0.258736	0.210914
	Cog5	-0.0662539	0.0503937			Cog5	-0.0490483	0.0490983
	Cog6	-1.00444	0.402131			Cog6	-1.26943	0.293539
	Cog7	-0.0903376	0.174208			Cog7	-0.154506	0.0795602
	Cog8	-1.03101	0.981317			Cog8	-0.586588	0.270554
	Coil	-0.42573	0.94586			Coil	-0.702729	0.717657
	Col4a3bp	-0.83471	1.2318			Col4a3bp	-0.0891127	0.0769798
	Col6a1	-3.68399	1.06727			Col6a1	-2.49022	0.614178
	Colgalt1	-0.460528	0.629392			Colgalt1	-0.463783	0.536644
	Commd1	-0.917072	1.01297			Commd1	-0.393758	0.292961
	Commd10	-0.0428435	0.0547587			Commd10	-0.125092	0.14764
	Commd2	0.750458	1.05592			Commd2	0.0629427	0.0441158
	Commd3	-1.36167	1.5594			Commd3	-0.963948	0.695911
	Commd4	-0.14505	0.300232			Commd4	-0.610758	0.781619
	Commd5	-0.114454	0.104698			Commd5	0.0512084	0.0360926
	Commd6	-1.13741	0.616347			Commd6	0.298124	0.169919
	Commd7	-0.260512	0.355601			Commd7	-0.467483	0.462212
	Commd8	-0.476653	0.254207			Commd8	-2.02933	1.27192
	Commd9	-0.0936009	0.0751253			Commd9	-0.617423	0.512417
	Comt	-0.340616	0.464427			Comt	-0.432544	0.547349
	Comtd1	-0.929097	0.445381			Comtd1	1.76636	1.68588
	Copa	-0.144422	0.257049			Copa	-0.305474	0.331988
	Copb1	-0.296419	0.618629			Copb1	-0.210093	0.25315
	Copb2	-0.271229	0.591216			Copb2	-0.0644278	0.0711862
	Cope	-0.115786	0.202369			Cope	-0.0367115	0.0393723
	Copg1	-0.0710638	0.0927646			Copg1	-0.527462	0.861557
	Copg2	-0.370658	0.88137			Copg2	0.019202	0.0214797
	Cops2	-0.101043	0.118754			Cops2	-0.420421	0.553346
	Cops3	-0.272546	0.54594			Cops3	-0.244975	0.332315
	Cops4	-0.441775	0.764668			Cops4	-0.572365	0.747325
	Cops5	-0.184461	0.223903			Cops5	-0.70123	1.21947
	Cops6	-0.666043	0.832025			Cops6	-0.437975	0.549099
	Cops7a	0.298733	0.401921			Cops7a	-0.180569	0.149954
	Cops7b	1.16824	0.53342			Cops7b	0.0629054	0.0399813
	Cops8	-0.928187	1.14802			Cops8	0.218024	0.182653
	Copz1	-0.472824	0.593178			Copz1	0.039039	0.0378075
	Coq3	-0.182374	0.345254			Coq3	0.674744	0.619045
	Coq4	-0.517264	0.218657			Coq4
	Coq5	-0.716957	1.187			Coq5	-0.294133	0.31349
	Coq6	2.84838	0.671363			Coq6	-0.330166	0.431047
	Coq7	-0.655386	1.06479			Coq7	0.0151791	0.0102405
	Coq9	0.211871	0.284417			Coq9	0.277978	0.116109
	Coro1a	-0.198588	0.324026			Coro1a	-0.221671	0.239877
	Coro1b	-0.349948	0.717281			Coro1b	0.0595391	0.0423328
	Coro1c	-0.423842	0.98097			Coro1c	-0.204401	0.223588
	Coro2a	0.469062	1.2612			Coro2a	-0.074025	0.0612637
	Coro7	-0.292841	0.647745			Coro7	-0.266998	0.290988
	Cotl1	-0.246132	0.341229			Cotl1	0.0563174	0.0516629
	Cox10	-0.203397	0.280663			Cox10	0.735476	0.264835
	Cox11	0.764152	0.886591			Cox11	-0.0007953	0.00060789
	Cox15	-0.0025392	0.00319182			Cox15	0.00337057	0.00233558
	Cox16	-0.706742	0.737616			Cox16	-0.50147	0.446006
	Cox17	-0.712542	1.32034			Cox17	-0.77809	0.528434
	Cox18	-0.124911	0.0495105			Cox18	1.0579	0.694379
	Cox20	1.44611	2.31234			Cox20	-0.461249	0.238889
	Cox4i1	-0.215753	0.21177			Cox4i1	-0.865822	0.836561
	Cox5a	-1.25243	1.43344			Cox5a	-0.628526	0.585144
	Cox5b	0.335366	0.294965			Cox5b	-0.705885	0.501107
	Cox6a1	0.228085	0.196016			Cox6a1	-2.68935	0.909905
	Cox6b1	-0.294431	0.131426			Cox6b1	-1.72262	0.886878
	Cox6c	-0.152626	0.0546197			Cox6c	0.176803	0.0956908
	Cox7a2					Cox7a2	-1.25421	0.82964
	Cox7a2l	0.751455	0.224006			Cox7a2l	-2.46815	1.48061
	Cpa3					Cpa3
	Cpd	-0.466345	0.701928			Cpd	-0.457851	0.275454
	Cpm	-0.674864	0.797082			Cpm	-0.898958	0.878983
	Cpne1	-0.595106	1.26705			Cpne1	0.416331	0.349868
	Cpne3	0.596841	1.4497			Cpne3	-0.114973	0.143812
	Cpox	-0.502846	1.26665			Cpox	-0.578576	0.83582
	Cpped1	-0.829981	0.828771			Cpped1	-0.489479	0.638825
	Cpsf1	-0.398531	0.761865			Cpsf1	-0.219007	0.282476
	Cpsf2	-0.329888	0.542548			Cpsf2	-0.0994357	0.093295
	Cpsf3	-0.423685	0.63458			Cpsf3	0.453141	0.375218
	Cpsf3l	-0.0154941	0.0186489			Cpsf3l	0.00189008	0.0018058
	Cpsf4	-0.0503031	0.074133			Cpsf4	-0.22173	0.273949
	Cpsf4	0.129728	0.0341885			Cpsf4	-0.0718845	0.0271968
	Cpsf6	-0.249856	0.233451			Cpsf6	0.138915	0.0993562
	Cpsf7	0.843981	1.58471			Cpsf7	0.741084	0.987307
	Cpt1a	-0.820795	1.42594			Cpt1a	-0.139945	0.0955274
	Cpt2	-0.131448	0.229854			Cpt2	0.0719779	0.0766295
	Cptp	-1.79727	1.72025			Cptp	0.360761	0.304017
	Cr1l	-0.0043805	0.00306929			Cr1l	-0.526071	0.774306
	Crabp2	-0.0071134	0.00572309			Crabp2	-1.42229	1.6373
	Cracr2a	-0.404803	0.404666			Cracr2a
	Cradd	-1.56731	2.2757			Cradd	-0.426726	0.202091
	Cramp1l	1.82533	0.519584			Cramp1l	-1.44486	0.739014
	Crat					Crat
	Crbn	0.565309	1.00057			Crbn	0.210434	0.290277
	Creb1	0.0895395	0.0635607			Creb1	-0.306514	0.439139
	Crebbp	-0.315585	0.383966			Crebbp	-0.430102	0.409691
	Crebrf					Crebrf
	Creg1	-1.11032	1.48772			Creg1	1.44251	1.0113
	Creld2	-0.463029	0.769101			Creld2	-0.556774	0.665357
	Crem					Crem	1.88022	1.62459
	Crip1	-0.522439	0.304899			Crip1	-1.79798	0.701877
	Crip2	-0.180686	0.236642			Crip2	-0.647115	1.0167
	Cript	-0.979419	0.996964			Cript	-1.17486	0.425034
	Crk	-1.12726	0.846251			Crk	0.218203	0.123389
	Crkl	-0.388584	0.766574			Crkl	0.114515	0.0886439
	Crlf2					Crlf2
	Crlf3	-0.957084	2.08506			Crlf3	-0.411601	0.522774
	Crls1	-0.596072	0.47422			Crls1	-0.754497	1.07302
	Crmp1					Crmp1	-0.448616	0.270193
	Crnkl1	-0.165407	0.350702			Crnkl1	0.187355	0.200117
	Crocc	-0.0147628	0.0186147			Crocc	0.237455	0.0819237
	Crot	-0.163411	0.0778695			Crot	0.444893	0.626588
	Crtam	-1.20289	0.982863			Crtam
	Crtap	-0.36018	0.364354			Crtap	2.33887	1.42204
	Crtc1					Crtc1
	Crtc2	-0.283317	0.209954			Crtc2	-0.35269	0.237334
	Crtc3					Crtc3	-3.25765	3.01424
	Cry1	-0.526302	0.788733			Cry1	1.51848	0.244931
	Cry2	1.41931	1.35361			Cry2	-0.0724119	0.0548284
	Cryl1	0.250393	0.324397			Cryl1	0.232147	0.269378
	Cryz	-0.248029	0.20355			Cryz	-5.31564	2.68403
	Cryzl1	0.116082	0.221477			Cryzl1	0.0801304	0.0946901
	Cs	-0.440095	1.05309			Cs	-0.289648	0.386334
	Csad					Csad
	Csde1	-0.0670457	0.125091			Csde1	-0.30298	0.434354
	Cse1l	-0.917887	1.12187			Cse1l	-0.48019	0.203905
	Csgalnact2					Csgalnact2
	Csk	-0.153161	0.289249			Csk	-0.0078756	0.00763678
	Csnk1a1	0.136519	0.21501			Csnk1a1	-0.350523	0.290047
	Csnk1a1	1.45893	0.599891			Csnk1a1	-0.276161	0.235752
	Csnk1d	-0.124224	0.188394			Csnk1d	0.529777	0.608462
	Csnk1e	-0.446351	0.493696			Csnk1e	0.406938	0.176622
	Csnk1g1	-0.453356	0.497124			Csnk1g1	-0.612429	0.475227
	Csnk1g2	0.962836	0.836608			Csnk1g2	0.974622	0.459306
	Csnk1g3	0.204132	0.302953			Csnk1g3	0.0329504	0.0165762
	Csnk2a1	-0.631812	1.35236			Csnk2a1	-0.300154	0.419385
	Csnk2a2	-0.581676	0.921043			Csnk2a2	-0.18578	0.246894
	Csnk2b	-0.047218	0.0789161			Csnk2b	-0.202016	0.23282
	Csprs	0.321948	0.152541			Csprs	0.798299	0.782447
	Csrp1	0.217798	0.429679			Csrp1	0.481517	0.722561
	Csrp2bp	-0.0694136	0.0310503			Csrp2bp	-0.338433	0.299491
	Cst3					Cst3	-1.59557	1.03508
	Cst7	0.0230981	0.0156652			Cst7
	Cstb	-0.0638182	0.0349149			Cstb	0.623683	0.278119
	Cstf1	-0.369959	0.833192			Cstf1	-0.26394	0.330448
	Cstf2	-0.45324	0.782897			Cstf2	0.25898	0.210029
	Cstf2t	0.0408674	0.0290497			Cstf2t	-0.350569	0.233649
	Cstf3	-0.553252	1.31676			Cstf3	0.156103	0.210533
	Ctbp1	-0.109233	0.0938862			Ctbp1	-0.445748	0.673701
	Ctbs	-1.09665	1.33149			Ctbs
	Ctc1	-0.0490304	0.0411867			Ctc1	-0.807427	1.16396
	Ctc1	0.053157	0.0876016			Ctc1	0.00697525	0.00655915
	Ctcf	-0.0721874	0.111131			Ctcf	-0.309059	0.381321
	Ctdnep1	-0.337246	0.253548			Ctdnep1	2.2477	1.37932
	Ctdp1	-0.246897	0.59755			Ctdp1	-0.162445	0.184708
	Ctdsp1	-0.896133	1.30916			Ctdsp1	-0.0858362	0.056925
	Ctdspl2	-0.224425	0.374137			Ctdspl2	-0.161445	0.201283
	Cth	-0.819639	0.273774			Cth
	Ctla4	-0.248301	0.0920285			Ctla4	-1.5034	0.752326
	Ctnna1	-0.616665	1.09421			Ctnna1	-0.709866	0.759495
	Ctnna2	-0.417036	0.287123			Ctnna2	-1.33753	1.0224
	Ctnnbl1	-0.451628	0.91444			Ctnnbl1	-0.584256	0.8177
	Ctps1	-0.447087	1.03182			Ctps1	-0.445336	0.566143
	Ctps2	-0.266121	0.36186			Ctps2	0.00031411	0.00028937
	Ctr9	-0.298994	0.413567			Ctr9	-0.23509	0.273395
	Ctsa	-0.0676005	0.0412391			Ctsa	0.207401	0.0924191
	Ctsb	-0.48947	0.439369			Ctsb	-0.499831	0.295011
	Ctsc	-0.600004	0.407066			Ctsc	0.743798	0.328759
	Ctsd	-0.916983	1.91871			Ctsd	-0.318949	0.310165
	Ctse					Ctse
	Ctsl	-1.2866	0.993278			Ctsl
	Ctss	-0.223119	0.404935			Ctss	0.136748	0.180101
	Ctsw	-2.403	1.86429			Ctsw
	Ctsz	-0.396544	0.761631			Ctsz	-0.0696574	0.065542
	Ctu1	-0.141769	0.198148			Ctu1	-0.8473	0.811745
	Ctu2	-0.325916	0.817721			Ctu2	-0.439422	0.598638
	Cuedc2	0.563912	0.921942			Cuedc2	-1.14922	1.07532
	Cul1	-0.314772	0.650615			Cul1	-0.506119	0.671846
	Cul2	-0.195306	0.328999			Cul2	-0.268649	0.317291
	Cul3	-0.0678399	0.122813			Cul3	-0.109709	0.129412
	Cul4a	-0.281404	0.334514			Cul4a	-0.0339381	0.0396075
	Cul4b	-0.239962	0.490511			Cul4b	-0.36685	0.554982
	Cul5	0.123562	0.240163			Cul5	-0.382739	0.497564
	Cul7	1.79405	0.351905			Cul7	4.11878	2.07161
	Cutc	0.946091	0.717095			Cutc	-0.0504299	0.0415176
	Cux1	0.421834	0.314191			Cux1	1.98027	1.75213
	Cux1	-0.501186	1.15307			Cux1	0.855028	0.668233
	Cwc15	-0.227013	0.531982			Cwc15	-0.182892	0.196794
	Cwc22	-0.57388	1.24267			Cwc22	0.231749	0.18249
	Cwc25	0.103321	0.0623053			Cwc25	0.508965	0.482993
	Cwc27	-0.317827	0.567986			Cwc27	0.010377	0.0118338
	Cwf19l1	-0.49404	1.18554			Cwf19l1	-0.419334	0.613823
	Cwf19l2	0.260928	0.254012			Cwf19l2	0.175981	0.217692
	Cxxc1	-0.0077118	0.00605722			Cxxc1	-0.391517	0.504702
	Cyb561d2	-1.6783	0.815789			Cyb561d2	-1.21764	0.657953
	Cyb5a	-0.737903	0.893566			Cyb5a	-0.217602	0.16921
	Cyb5b	-0.801195	1.12646			Cyb5b	-0.26992	0.264112
	Cyb5r1	-1.03779	0.990688			Cyb5r1	-1.35724	1.13971
	Cyb5r3	-0.348706	0.516783			Cyb5r3	-0.555936	0.559602
	Cyb5r4	-0.397396	0.872302			Cyb5r4	-0.789648	1.13131
	Cyba	-0.584199	0.581104			Cyba	-1.03393	1.24055
	Cybb					Cybb	-1.79799	1.44326
	Cyc1	-1.61307	1.25559			Cyc1	-0.59933	0.450416
	Cycs	-0.539766	0.449646			Cycs	-0.485807	0.240033
	Cyfip1	1.41513	1.45646			Cyfip1	-0.838081	0.542096
	Cyfip2	-0.165968	0.344584			Cyfip2	-0.0432131	0.0426616
	Cyhr1	-0.518571	0.280283			Cyhr1
	Cyhr1	-0.293541	0.179292			Cyhr1	0.368142	0.530644
	Cyld	-0.102443	0.149623			Cyld	0.0532807	0.0604646
	Cyp20a1	-0.554266	0.855446			Cyp20a1	-0.137536	0.153507
	Cyp2s1	-2.23773	1.37281			Cyp2s1	1.55225	0.961746
	Cyp51a1	-0.338916	0.585705			Cyp51a1	-0.431739	0.494351
	Cyth1	0.641825	0.512781			Cyth1	0.0245859	0.0210128
	Cyth2	0.15453	0.308869			Cyth2	-0.0023005	0.00138238
	Cyth3	2.35628	1.38486			Cyth3
	Cyth4	-0.463285	1.1748			Cyth4	0.0603355	0.0560546
	Cytip	-0.535878	0.508459			Cytip	-0.39853	0.48585
	D10Jhu81e	-0.804977	1.80659			D10Jhu81e	0.296398	0.372423
	D10Wsu102e	-0.946131	0.42928			D10Wsu102e	0.212527	0.286483
	D11Wsu47e	-1.02415	2.81231			D11Wsu47e
	D17Wsu92e	-0.312221	0.307256			D17Wsu92e	0.0496122	0.0228739
	D2hgdh					D2hgdh
	D2Wsu81e	-0.721039	1.62121			D2Wsu81e	-1.23346	1.1589
	D6Wsu163e	0.543324	0.252031			D6Wsu163e	0.403168	0.423829
	D8Ertd738e	-0.160088	0.0557814			D8Ertd738e	0.611475	0.382092
	Daam1					Daam1	-1.4066	0.731968
	Dad1	-0.1939	0.237357			Dad1	-1.21374	0.804313
	Dag1	2.4479	0.50742			Dag1	-1.89903	1.25989
	Daglb	0.519273	0.353989			Daglb
	Dak	-0.713509	1.05803			Dak	0.372544	0.247108
	Dalrd3	0.463266	0.292111			Dalrd3	-0.560594	0.486833
	Dap3	-0.380236	0.577017			Dap3	-0.197659	0.155006
	Dapk3	-0.903698	0.798209			Dapk3	1.64022	1.87979
	Dapl1					Dapl1
	Dapp1	-1.34967	1.2605			Dapp1	-0.458039	0.426648
	Dars	-0.173006	0.333627			Dars	-0.209812	0.254873
	Dars2	-1.01631	0.680202			Dars2	-0.258567	0.243092
	Daxx	-0.917265	2.07991			Daxx	-0.279201	0.206259
	Dazap1	-0.273448	0.393359			Dazap1	-0.445981	0.494977
	Dbf4	-1.00631	0.472142			Dbf4
	Dbi	-2.20703	0.727792			Dbi	-0.436109	0.426909
	Dbnl	-0.23152	0.387069			Dbnl	0.0335356	0.0349565
	Dbr1	-0.666688	1.17005			Dbr1	0.0381256	0.0210917
	Dbt	-0.349717	0.73661			Dbt	-0.0893587	0.104622
	Dcaf10	-0.378813	0.456346			Dcaf10
	Dcaf11	0.40093	0.776074			Dcaf11	0.26961	0.257917
	Dcaf12	0.256865	0.145689			Dcaf12	0.580109	0.279967
	Dcaf13	-0.304104	0.452948			Dcaf13	-0.452064	0.580577
	Dcaf15	-0.227145	0.344819			Dcaf15	-0.64334	0.844862
	Dcaf4	-0.0444306	0.0413788			Dcaf4	-0.233268	0.262621
	Dcaf5	-1.20339	1.34793			Dcaf5	0.57983	0.41067
	Dcaf7	-0.243741	0.526165			Dcaf7	-0.193111	0.212088
	Dcaf8	0.415383	0.808617			Dcaf8	-0.73395	0.776308
	Dcakd	0.361969	0.317664			Dcakd	-0.33472	0.290041
	Dck	-0.304367	0.311983			Dck	-0.283305	0.24563
	Dcp1a	-0.299636	0.324456			Dcp1a	-0.331453	0.330375
	Dcp1b	0.580473	0.337898			Dcp1b	0.568562	0.32155
	Dcp2	-0.0317641	0.0191489			Dcp2	-0.82689	0.702168
	Dcps	0.0319784	0.0452999			Dcps	-0.204673	0.251739
	Dctd	-0.822881	1.35695			Dctd	-0.146802	0.0860086
	Dctn1	0.0239779	0.0365182			Dctn1	0.137757	0.125873
	Dctn2	-0.32053	0.440281			Dctn2	-0.200447	0.219954
	Dctn3	-0.625036	0.952974			Dctn3	0.0766191	0.0199389
	Dctn4	-0.0714369	0.0876152			Dctn4	-0.348022	0.489349
	Dctn5	-0.101801	0.138668			Dctn5	-0.248118	0.181774
	Dctn6	0.413315	0.427792			Dctn6	-0.117206	0.103124
	Dcun1d1	0.206594	0.3485			Dcun1d1	-0.110482	0.0875024
	Dcun1d2	0.820274	0.398614			Dcun1d2	0.729965	0.664761
	Dcun1d4					Dcun1d4	5.73605	2.86703
	Dcun1d5	0.375712	0.765543			Dcun1d5	0.241152	0.256887
	Ddb1	-0.0353663	0.0625859			Ddb1	-0.0926404	0.0968712
	Ddb2	-1.18389	2.68378			Ddb2	-0.697353	0.758043
	Ddhd1	-0.0952493	0.0430366			Ddhd1
	Ddhd2	-1.4178	1.57731			Ddhd2	-0.778462	0.664379
	Ddi2	-0.269542	0.573985			Ddi2	0.0427554	0.0453088
	Ddost	-0.536031	0.59374			Ddost	-0.575421	0.813655
	Ddrgk1	-0.747957	1.36913			Ddrgk1	-1.56063	1.55263
	Ddt	-1.63827	1.31987			Ddt	-0.370888	0.188549
	Ddx1	-0.184535	0.35619			Ddx1	-0.359418	0.460622
	Ddx10	-0.329863	0.828334			Ddx10	-0.376925	0.516777
	Ddx11	0.0714257	0.0804181			Ddx11	-1.94352	1.75526
	Ddx17	-0.21667	0.428904			Ddx17	-0.130603	0.143409
	Ddx18	-0.491456	1.20035			Ddx18	-0.247608	0.351434
	Ddx19a	0.40479	0.3821			Ddx19a	-0.280162	0.160578
	Ddx19b	-0.398036	0.787834			Ddx19b	-0.197073	0.204285
	Ddx20	-0.448756	1.14826			Ddx20	-0.464161	0.632688
	Ddx21	-0.273136	0.567753			Ddx21	-0.417683	0.612834
	Ddx23	-0.417772	0.991019			Ddx23	0.0142969	0.0151859
	Ddx24	-0.218795	0.52745			Ddx24	-0.678396	1.05243
	Ddx26b	2.61617	0.525797			Ddx26b	-0.51284	0.163514
	Ddx27	-0.0884116	0.141739			Ddx27	-0.244879	0.342006
	Ddx28	-0.454756	0.722853			Ddx28	-0.0100851	0.00986176
	Ddx31	-0.600403	1.15325			Ddx31	-0.355362	0.424361
	Ddx39a	-0.121223	0.160638			Ddx39a	-0.46533	0.606982
	Ddx39b	0.157076	0.199722			Ddx39b	-0.225813	0.304396
	Ddx3x	-0.356438	0.916509			Ddx3x	-0.361314	0.53491
	Ddx3y	-0.601276	1.43801			Ddx3y	-0.474948	0.694518
	Ddx41	-0.278619	0.417132			Ddx41	-0.201282	0.253012
	Ddx42	-0.310022	0.610519			Ddx42	-0.20322	0.259734
	Ddx46	-0.130511	0.269382			Ddx46	-0.16005	0.182172
	Ddx47	-0.500035	1.16561			Ddx47	-0.326885	0.436497
	Ddx49	-0.122608	0.186826			Ddx49	-0.423572	0.60688
	Ddx5	-0.257087	0.511804			Ddx5	-0.220853	0.259241
	Ddx50	0.140329	0.144934			Ddx50	0.313434	0.164379
	Ddx51	-0.183422	0.358131			Ddx51	-0.161379	0.189894
	Ddx52	-0.12648	0.208275			Ddx52	-0.143441	0.182041
	Ddx54	-0.363198	0.814868			Ddx54	-0.56517	0.758156
	Ddx55	-0.42177	0.955744			Ddx55	-0.162767	0.184539
	Ddx56	-0.515506	0.955854			Ddx56	-0.435084	0.59673
	Ddx58	-0.211172	0.418776			Ddx58	0.0393913	0.0419011
	Ddx59	-1.52573	1.16179			Ddx59	-1.60377	1.03988
	Ddx6	0.0623016	0.0900425			Ddx6	-0.321689	0.425208
	Ddx60					Ddx60
	Deaf1					Deaf1
	Decr1	-0.79603	0.840235			Decr1	0.227419	0.139654
	Decr2					Decr2	-1.15724	0.575036
	Def6	-0.19645	0.245327			Def6	-0.339536	0.446919
	Degs1	-0.288265	0.583835			Degs1	-0.234074	0.2713
	Dek	0.0539089	0.0849139			Dek	0.162026	0.166076
	Dennd1a	-0.0856765	0.0364756			Dennd1a	-1.11751	0.797488
	Dennd1b	-0.846074	0.694387			Dennd1b	0.208083	0.173582
	Dennd1c	0.51857	0.548522			Dennd1c	-0.425428	0.51699
	Dennd2d	-0.421743	0.615928			Dennd2d	0.195937	0.229864
	Dennd4a	-0.507346	0.851972			Dennd4a
	Dennd4b	-0.582909	0.82725			Dennd4b	-0.245106	0.307401
	Dennd4c	-0.295481	0.480422			Dennd4c	-0.469568	0.466971
	Dennd5a;Dennd5b					Dennd5a;Dennd5b	0.0429776	0.0289571
	Dennd6a					Dennd6a
	Denr	-0.182054	0.321888			Denr	-0.25938	0.299769
	Depdc5	0.213089	0.157395			Depdc5	3.05716	1.75947
	Depdc7	0.518023	0.21859			Depdc7	-0.84974	0.3981
	Dera	0.435864	0.737175			Dera	0.154522	0.193435
	Derl1	-0.667238	0.33575			Derl1	1.51753	1.06292
	Derl2	-0.56941	1.05682			Derl2	-0.423841	0.569054
	Desi2	-0.923024	0.834436			Desi2	-0.136881	0.093776
	Det1					Det1	1.84602	0.909539
	Dffa	-0.0895519	0.134621			Dffa	-1.01378	0.989944
	Dffa	-0.586464	0.359199			Dffa	-0.37104	0.42323
	Dffb	-0.429579	1.02943			Dffb	0.218186	0.232674
	Dgat1	-0.103364	0.0679433			Dgat1	0.139432	0.13013
	Dgcr14	-1.20765	2.13949			Dgcr14	-0.226507	0.218961
	Dgcr8	-0.655115	0.452509			Dgcr8	-0.0510314	0.0505572
	Dgka	-0.219768	0.206728			Dgka	0.108574	0.123237
	Dgkd	-0.703625	1.34364			Dgkd	1.12748	0.977198
	Dgke	-1.21546	0.563426			Dgke	-0.522247	0.318145
	Dgkh	-1.47196	1.63704			Dgkh	-1.75921	1.12833
	Dgkq					Dgkq	-0.402515	0.498182
	Dgkz	-0.0667645	0.105031			Dgkz	0.147855	0.106143
	Dguok	-0.158024	0.261267			Dguok	0.490955	0.694471
	Dhcr24	-0.001623	0.00155791			Dhcr24	-1.09865	1.69521
	Dhcr7	-0.413995	0.659838			Dhcr7	0.0240043	0.0223546
	Dhdds	0.146394	0.212659			Dhdds	-0.291322	0.303439
	Dhdh					Dhdh
	Dhfr	-0.360475	0.589988			Dhfr	-0.0986133	0.0961985
	Dhodh	-0.374797	0.584819			Dhodh	-0.584408	0.827418
	Dhps	-0.414357	0.654953			Dhps	-0.315823	0.30405
	Dhrs1	1.46741	1.65794			Dhrs1	0.832233	1.06324
	Dhrs11	-2.8085	3.84758			Dhrs11	0.898968	0.487819
	Dhrs13	0.0617755	0.0454			Dhrs13	-0.652972	0.774389
	Dhrs4	0.0228334	0.0247045			Dhrs4	-0.627326	0.908435
	Dhrs7	0.904393	1.28812			Dhrs7	0.25889	0.277143
	Dhrs7b	0.256431	0.177506			Dhrs7b	0.372381	0.481561
	Dhrsx	-1.77389	0.803559			Dhrsx	0.805742	0.507269
	Dhx15	-0.148884	0.305483			Dhx15	-0.364042	0.514704
	Dhx16	-0.28412	0.638469			Dhx16	-0.457585	0.718549
	Dhx29	-0.113213	0.198458			Dhx29	-0.43647	0.600295
	Dhx30	-0.282444	0.663436			Dhx30	-0.365206	0.323806
	Dhx30	-0.163475	0.314532			Dhx30
	Dhx32	-0.660348	0.590709			Dhx32	-0.269914	0.308181
	Dhx33	-0.521424	0.88837			Dhx33	-0.425437	0.577419
	Dhx34	-0.104867	0.120936			Dhx34	-2.19727	1.19319
	Dhx35	-0.283397	0.373277			Dhx35	0.242412	0.272842
	Dhx36	-0.639888	1.5537			Dhx36	-0.448206	0.561676
	Dhx37	-0.3698	0.799569			Dhx37	-0.33933	0.321136
	Dhx38	-0.175966	0.335432			Dhx38	-0.173276	0.20109
	Dhx40	1.31121	0.676682			Dhx40	-0.300882	0.337135
	Dhx57	-0.767031	0.766568			Dhx57	-1.44373	1.27361
	Dhx58	1.34999	0.471208			Dhx58
	Dhx8	0.13233	0.279633			Dhx8	-0.285929	0.423912
	Dhx9	-0.218953	0.348228			Dhx9	-0.931683	0.607583
	Dhx9	1.09204	0.388113			Dhx9	-0.238743	0.264729
	Diablo	-1.90634	1.21807			Diablo	-1.26044	0.725512
	Diaph1	0.444804	0.357652			Diaph1	-0.264931	0.335841
	Diaph2	0.644242	1.54486			Diaph2	-0.0089732	0.00797296
	Diaph3	0.261519	0.321423			Diaph3	-0.867683	0.729787
	Dicer1	-0.201828	0.23309			Dicer1	0.123626	0.14624
	Dido1	-0.502955	0.825659			Dido1	-0.420489	0.347807
	Diexf	-0.098154	0.201305			Diexf	-0.776536	0.676787
	Dimt1	-0.262926	0.4484			Dimt1	-0.344454	0.482241
	Dip2b	-0.0174451	0.0292913			Dip2b	0.0906919	0.0744994
	Dip2c					Dip2c	0.51245	0.312954
	Dirc2					Dirc2
	Dis3	-0.252532	0.602753			Dis3	-0.322065	0.450156
	Dis3l	-0.270197	0.597091			Dis3l	-0.17138	0.175597
	Dis3l2	0.0513113	0.0635668			Dis3l2	-0.0596085	0.0581789
	Dkc1	0.0424402	0.0637892			Dkc1	-0.257543	0.319103
	Dlat	-0.177153	0.315378			Dlat	0.0286406	0.0316649
	Dld	-0.156798	0.164476			Dld	-0.0569796	0.0556722
	Dlg1	-0.537847	0.863638			Dlg1	-0.494463	0.513991
	Dlg3	0.572158	1.13923			Dlg3	-0.105614	0.0726954
	Dlgap4	0.115886	0.187914			Dlgap4	0.0618093	0.043961
	Dlgap5	-0.218859	0.284754			Dlgap5	-0.556451	0.867184
	Dlst	0.0723196	0.111985			Dlst	-0.161343	0.208233
	Dmap1	-0.0582821	0.0865959			Dmap1	0.11836	0.136356
	Dmxl1	-0.319574	0.54013			Dmxl1	0.530825	0.251998
	Dna2	-0.818116	1.88692			Dna2	-0.683001	1.00178
	Dnaaf2	0.107658	0.0512305			Dnaaf2	0.54474	0.315044
	Dnaaf5	-0.257524	0.436162			Dnaaf5	-0.709598	1.02173
	Dnaja1	-0.414974	0.732683			Dnaja1	-0.499421	0.77757
	Dnaja2	-0.214218	0.401408			Dnaja2	-0.506975	0.806109
	Dnaja3	-0.853293	0.374294			Dnaja3	-0.353407	0.458754
	Dnaja3	-0.479562	0.887105			Dnaja3	-0.0171825	0.00862154
	Dnaja4	-1.02979	2.24237			Dnaja4	-0.34154	0.321947
	Dnajb1	0.0257483	0.0432932			Dnajb1	-0.449964	0.572285
	Dnajb11	-0.932999	1.65767			Dnajb11	-0.691538	0.619126
	Dnajb12	0.0980257	0.174634			Dnajb12	0.258902	0.315771
	Dnajb2	0.57233	0.640901			Dnajb2	0.663914	0.69843
	Dnajb4	-0.689736	0.304069			Dnajb4	1.69506	1.52463
	Dnajb5	-0.0313353	0.0441866			Dnajb5	-1.79497	1.33323
	Dnajb6	-0.0494856	0.0830804			Dnajb6	-0.438227	0.682161
	Dnajc1	-0.187635	0.318599			Dnajc1	-0.175945	0.153973
	Dnajc10	-0.200877	0.28591			Dnajc10	-0.45097	0.56427
	Dnajc11	-0.504324	0.77167			Dnajc11	-0.20426	0.203338
	Dnajc13	-0.584505	1.61748			Dnajc13	-0.192088	0.214588
	Dnajc15	-1.09793	0.428718			Dnajc15	-0.920909	0.208984
	Dnajc16	-0.756346	0.401728			Dnajc16	0.626732	0.504168
	Dnajc17	-0.65614	1.26706			Dnajc17	-0.73349	0.544325
	Dnajc2	-0.213607	0.294338			Dnajc2	-0.40624	0.437251
	Dnajc21	0.138007	0.224301			Dnajc21	-0.252843	0.321663
	Dnajc24	-0.593808	0.762798			Dnajc24	-1.45881	0.874594
	Dnajc3	-0.442843	0.699976			Dnajc3	-0.007342	0.00589638
	Dnajc5	-0.916899	1.23083			Dnajc5	-0.776204	1.06574
	Dnajc7	-0.319686	0.573794			Dnajc7	-0.285077	0.413376
	Dnajc8	-0.328248	0.551331			Dnajc8	0.0354593	0.0327162
	Dnajc9	0.151633	0.268396			Dnajc9	-0.199726	0.223167
	Dnlz	-1.17245	0.789983			Dnlz	-1.12214	0.575699
	Dnm1l	-0.50443	0.789825			Dnm1l	-0.353021	0.399633
	Dnm1l	-0.232508	0.202339			Dnm1l	-0.0012675	0.00090599
	Dnm2	-0.288179	0.562412			Dnm2	0.0111516	0.0116786
	Dnm3	0.955562	0.360319			Dnm3	-0.19097	0.107497
	Dnmt1	-0.188797	0.426454			Dnmt1	-0.242098	0.265185
	Dnmt3a	-0.30528	0.639729			Dnmt3a	-0.584663	0.727888
	Dnmt3b	-0.797343	1.91206			Dnmt3b	-0.0903894	0.0778189
	Dnpep	-0.35745	0.797779			Dnpep	0.106704	0.0765964
	Dnph1	-0.965919	1.66228			Dnph1	-0.791676	0.703796
	Dnttip1	-0.468861	0.855274			Dnttip1	-0.399804	0.516756
	Dnttip2	-0.866489	2.25447			Dnttip2	-0.461972	0.721313
	Dock10	-0.582281	0.537533			Dock10	0.215769	0.256511
	Dock10	-0.330765	0.643789			Dock10	0.84677	0.548205
	Dock11	-0.245366	0.473317			Dock11	0.1091	0.121683
	Dock2	-0.411051	1.0124			Dock2	-0.0799282	0.0828389
	Dock5	-0.748272	0.470404			Dock5
	Dock8	-0.117931	0.132904			Dock8	-0.156174	0.180784
	Dock9	-0.193155	0.137577			Dock9	0.907428	1.26903
	Dohh	-0.914705	1.4647			Dohh	-0.918119	1.06489
	Dok1	-0.352977	0.379767			Dok1	-0.65383	0.790948
	Dok2	1.39468	0.992816			Dok2	0.0939614	0.084601
	Donson	-0.0716538	0.0473948			Donson	-1.20151	1.1422
	Dopey1	-1.4082	1.50239			Dopey1	-0.649983	0.536041
	Dopey2	-0.7851	1.43051			Dopey2	1.79558	2.03942
	Dot1l	0.0233919	0.0182065			Dot1l	-0.91241	0.74462
	Dpagt1	-0.608809	1.19583			Dpagt1	-1.75998	1.79029
	Dpcd	-0.878109	1.47232			Dpcd	0.526704	0.203468
	Dpf2	-0.3979	1.00114			Dpf2	-0.34096	0.379567
	Dph1	-0.483816	0.355747			Dph1	-0.178821	0.175122
	Dph2	-0.294727	0.456916			Dph2	-0.0870411	0.0773847
	Dph3	-0.500289	0.297187			Dph3
	Dph5	-0.810715	1.29715			Dph5	-0.0043242	0.00430047
	Dph6	-0.187529	0.279325			Dph6	0.595979	0.554339
	Dph7	-0.318968	0.235456			Dph7	-0.133684	0.170711
	Dpm1	-1.05564	1.25391			Dpm1	0.286111	0.252443
	Dpm3	-0.990219	0.993067			Dpm3	0.149483	0.136137
	Dpp3	-0.233382	0.507427			Dpp3	-0.161191	0.204055
	Dpp4	-0.306908	0.538511			Dpp4	0.145929	0.133867
	Dpp7					Dpp7
	Dpp8	-0.874149	0.500796			Dpp8	-0.239403	0.165282
	Dpp9	-0.0266203	0.0432			Dpp9	0.449833	0.63578
	Dpy19l1	-0.766219	0.643445			Dpy19l1
	Dpy19l3					Dpy19l3
	Dpysl2	0.254268	0.35208			Dpysl2	-0.185827	0.250806
	Dr1	-0.145147	0.0634923			Dr1	0.454019	0.188857
	Drap1	-0.238752	0.455555			Drap1	-0.321007	0.42062
	Drg1	-0.198671	0.390289			Drg1	-0.210688	0.263506
	Drg2	-0.129111	0.135305			Drg2	-0.165483	0.182533
	Drosha	-0.402853	0.225234			Drosha	-0.531563	0.314431
	DSCC1	-0.531564	0.496279			DSCC1	0.376833	0.170406
	Dscr3	-1.19694	1.63729			Dscr3	-0.0664476	0.0794131
	Dsg1a;Dsg1b;Dsg1c					Dsg1a;Dsg1b;Dsg1c
	Dsn1	0.185233	0.166629			Dsn1	-1.13387	1.46889
	Dsp	1.28592	0.493376			Dsp	1.528	1.48354
	Dst	-1.37633	0.901369			Dst	0.166772	0.0364342
	Dstn	-0.697597	1.55497			Dstn	-0.330826	0.37833
	Dtd1	-0.388449	0.685296			Dtd1	-0.815846	0.453083
	Dtd2	-0.399613	0.265878			Dtd2	0.0863951	0.0572373
	Dtl	0.0204565	0.0169933			Dtl	0.430291	0.317045
	Dtnb					Dtnb
	Dtnbp1	-0.658816	0.312325			Dtnbp1	-1.82539	0.855702
	Dtwd1	0.522321	0.549121			Dtwd1	-1.61972	1.53063
	Dtx2	-0.52019	0.545732			Dtx2	-0.0545721	0.0226208
	Dtx3l	-0.228918	0.291804			Dtx3l	-0.0978938	0.097615
	Dtymk	-0.106614	0.165634			Dtymk	0.534333	0.590691
	Dus1l	0.0140365	0.00855886			Dus1l	-0.222297	0.219303
	Dus2	-0.753816	1.17892			Dus2	-0.785425	1.40752
	Dus3l	-0.836271	1.66972			Dus3l	-0.225869	0.269347
	Dus4l	-0.784476	1.40819			Dus4l	-0.096856	0.100724
	Dusp11	-0.0677498	0.067074			Dusp11	0.360872	0.379447
	Dusp12	-0.437246	0.672485			Dusp12	-0.30875	0.25885
	Dusp22	-0.173999	0.1125			Dusp22
	Dusp4	0.45193	0.560795			Dusp4	-0.883968	0.928118
	Dusp5	0.0614794	0.0355308			Dusp5	-0.837163	0.843476
	Dusp7	-0.680803	0.281345			Dusp7	0.2684	0.300396
	Dut	0.199976	0.395133			Dut	-0.251801	0.346394
	Dvl2	-0.295785	0.211614			Dvl2	0.315868	0.207547
	Dvl3					Dvl3
	Dxo	-1.05677	1.72287			Dxo	-0.333214	0.33576
	Dym	0.620342	0.202758			Dym	-0.0923075	0.101191
	Dync1h1	-0.0819699	0.13544			Dync1h1	-0.0691499	0.0669403
	Dync1i1	0.892151	0.250634			Dync1i1	0.139233	0.0976251
	Dync1i2	-0.160418	0.292748			Dync1i2	0.0282882	0.0287618
	Dync1li1	-0.922976	1.31781			Dync1li1	-0.256458	0.306079
	Dync1li2	-0.820482	0.987392			Dync1li2	-0.317823	0.415812
	Dynll1	-1.12232	1.23025			Dynll1	-1.23769	1.14986
	Dynll2	-2.62929	2.13636			Dynll2	0.561678	0.209406
	Dynlrb1	0.211546	0.196705			Dynlrb1	0.14637	0.154895
	Dynlt1	-1.22959	0.48846			Dynlt1	-0.0847175	0.0815292
	Dynlt3	0.2303	0.0998688			Dynlt3	0.729107	0.63225
	Dyrk1a	-0.640436	1.54937			Dyrk1a	-0.1377	0.128493
	E2f3	0.833988	1.96901			E2f3	0.349739	0.241513
	E2f4	-0.108094	0.191658			E2f4	-0.369582	0.44236
	E2f6	-0.647285	0.245728			E2f6
	E2f8	1.84796	0.504341			E2f8	7.57002	4.08317
	E4f1	0.119564	0.092319			E4f1
	Eaf1	0.557041	0.578055			Eaf1	-0.469564	0.702046
	Eapp	0.31943	0.832165			Eapp	-0.124564	0.116647
	Ears2	-0.390597	0.233992			Ears2	-1.11919	0.508635
	Ebag9	0.0527767	0.0296071			Ebag9
	Ebna1bp2	-0.144767	0.205709			Ebna1bp2	-0.263743	0.227493
	Ebp	-0.164497	0.197867			Ebp	-0.455125	0.655409
	Ecd	-0.769147	1.66934			Ecd	-0.384829	0.46505
	Ece1	-0.0353963	0.0263206			Ece1	-0.656808	0.287088
	Ech1	-0.283575	0.25555			Ech1	0.156679	0.189989
	Echdc1	-0.58856	0.647952			Echdc1	-0.908393	1.00516
	Echs1	-0.113278	0.207557			Echs1	-0.01979	0.0224481
	Eci1	0.0712034	0.100494			Eci1	-0.404827	0.586862
	Eci2	-0.845912	1.13716			Eci2	0.154711	0.121128
	Ecm29	-0.294899	0.556695			Ecm29	-0.391209	0.451768
	Ecsit	-0.183678	0.161841			Ecsit	-0.207467	0.231945
	Ect2	-0.961277	2.43368			Ect2	-1.10903	1.19396
	Edc3	-0.275927	0.536214			Edc3	-0.605144	0.806368
	Edc4	-0.482892	0.896744			Edc4	-0.244985	0.28335
	Edem1	-0.183018	0.249711			Edem1	0.128791	0.0718959
	Edem3	-0.0431757	0.0166196			Edem3	0.936253	0.914902
	Edf1	-0.286504	0.311382			Edf1	-0.477075	0.539073
	Edrf1	-1.54986	1.80203			Edrf1	-0.698982	0.718085
	Eea1	-0.202702	0.184785			Eea1	-0.111529	0.0922945
	Eed	-0.244685	0.231944			Eed	-0.210091	0.26816
	Eed	-0.324402	0.771024			Eed	0.634931	0.492239
	Eef1a1	-0.272915	0.518012			Eef1a1	-0.329864	0.467926
	Eef1a2					Eef1a2
	Eef1b;Eef1b2	0.0865209	0.134682			Eef1b;Eef1b2	-0.350791	0.420979
	Eef1d	0.00583807	0.00785306			Eef1d	-0.460548	0.635327
	Eef1d	-0.329142	0.491353			Eef1d	-0.33497	0.492393
	Eef1e1	-0.812319	0.346456			Eef1e1	0.303279	0.126319
	Eef1g	-0.327916	0.733416			Eef1g	-0.582598	0.970298
	Eef2	-0.149734	0.316098			Eef2	-0.323048	0.377528
	Eef2k	-0.0340082	0.0205257			Eef2k
	Eef2kmt	0.528609	0.813398			Eef2kmt	-1.54376	2.53012
	Eefsec	-0.572823	0.648115			Eefsec	-0.189659	0.229756
	Efhd2	0.0884951	0.118161			Efhd2	-0.186418	0.219151
	Efr3a	-0.200448	0.349746			Efr3a	0.672783	0.596304
	Eftud1	-0.282439	0.485557			Eftud1	-0.862015	0.960768
	Eftud2	-0.310576	0.804286			Eftud2	-0.422924	0.570834
	Egln1	-0.0733981	0.0348789			Egln1	0.903014	0.487103
	Egr1	-0.371308	0.163436			Egr1	-0.598395	0.442525
	Egr2	-0.319688	0.35549			Egr2	-0.0164075	0.0142686
	Egr3					Egr3
	Ehbp1l1	-0.207848	0.177985			Ehbp1l1	-1.17253	1.41331
	Ehd1	-0.0663626	0.0972087			Ehd1	-0.11172	0.102069
	Ehd3	-0.753204	1.397			Ehd3	0.00440074	0.00496039
	Ehd4	-0.317531	0.537054			Ehd4	-0.600658	0.796395
	Ehhadh					Ehhadh	-0.893099	0.802788
	Ehmt1	0.118948	0.130021			Ehmt1	-0.668598	0.711089
	Ehmt2	0.243372	0.409468			Ehmt2	-0.497383	0.55538
	Ei24	-0.183981	0.100251			Ei24	0.987956	1.23119
	Eif1	-0.676796	1.05057			Eif1	-0.147499	0.157121
	Eif1a	-0.171129	0.243114			Eif1a	0.0283636	0.0278761
	Eif1ad	-0.585628	0.9342			Eif1ad	-0.314816	0.330383
	Eif1ax	0.470996	0.34157			Eif1ax	1.00585	1.37168
	Eif1b	-1.09423	1.1081			Eif1b
	Eif2a	-0.341461	0.847954			Eif2a	-0.408025	0.604634
	Eif2ak1	-2.75371	3.69146			Eif2ak1	-1.52859	0.857164
	Eif2ak2	-0.467561	0.913814			Eif2ak2	-0.235973	0.305621
	Eif2ak4	0.382707	0.243084			Eif2ak4	0.0102593	0.00822863
	Eif2b1	-0.349468	0.705132			Eif2b1	-0.609297	1.07637
	Eif2b2	0.383124	0.52326			Eif2b2	0.332234	0.356063
	Eif2b3	-0.611849	0.573926			Eif2b3	-0.369374	0.548516
	Eif2b4	-0.358537	0.928961			Eif2b4	-0.811472	1.33693
	Eif2b4	-0.0795767	0.0369211			Eif2b4
	Eif2b5	-0.160022	0.267534			Eif2b5	-0.355841	0.284804
	Eif2d	-0.516331	0.775457			Eif2d	-0.17538	0.150189
	Eif2s1	-0.159887	0.324047			Eif2s1	-0.31402	0.437755
	Eif2s2	-0.312956	0.747355			Eif2s2	-0.4309	0.693872
	Eif2s3x	-0.337001	0.880403			Eif2s3x	-0.331537	0.438666
	Eif2s3y	-0.0744274	0.117117			Eif2s3y	-0.0431784	0.0443294
	Eif3a	-0.406523	0.867763			Eif3a	-0.621732	0.860276
	Eif3b	-0.224304	0.486824			Eif3b	-0.418051	0.625333
	Eif3c	-0.359332	0.869611			Eif3c	-0.506839	0.747449
	Eif3d	-0.294174	0.754633			Eif3d	-0.341904	0.421976
	Eif3e	-0.148321	0.308777			Eif3e	-0.257356	0.331354
	Eif3f	-0.260027	0.589501			Eif3f	-0.24237	0.294457
	Eif3g	-0.054294	0.0906395			Eif3g	-0.369664	0.533619
	Eif3h	-0.487036	1.05643			Eif3h	-0.190687	0.220173
	Eif3i	-0.488728	1.00237			Eif3i	-0.342129	0.425926
	Eif3j1;Eif3j2	-0.207931	0.285349			Eif3j1;Eif3j2	-0.256625	0.325366
	Eif3k	-0.542762	0.854157			Eif3k	-0.441238	0.695903
	Eif3l	0.167081	0.253558			Eif3l	-0.421285	0.652617
	Eif3m	-0.324091	0.714362			Eif3m	-0.266366	0.337687
	Eif4a1	-0.223968	0.466378			Eif4a1	-0.326948	0.444657
	Eif4a2	0.039208	0.0676322			Eif4a2	0.395975	0.525453
	Eif4a3	-0.228635	0.506545			Eif4a3	-0.340647	0.45844
	Eif4b	0.19187	0.337168			Eif4b	-0.269948	0.379696
	Eif4e	-0.517862	0.78319			Eif4e	-0.237913	0.156019
	Eif4e2	-1.12572	1.91173			Eif4e2	0.992199	0.359756
	Eif4e3	0.89764	0.468168			Eif4e3	0.251631	0.234942
	Eif4ebp2					Eif4ebp2	-1.77007	1.13434
	Eif4enif1	-0.20452	0.229145			Eif4enif1	-0.301186	0.243052
	Eif4g1	-0.245752	0.596564			Eif4g1	-0.39133	0.496438
	Eif4g2	-0.37359	0.77143			Eif4g2	-0.60491	0.762
	Eif4g3	-0.36692	0.7209			Eif4g3	-0.0903506	0.0757578
	Eif4h	-0.076448	0.15134			Eif4h	-0.403668	0.616418
	Eif5	-0.303836	0.472382			Eif5	-0.48908	0.619299
	Eif5a	-0.392466	0.872858			Eif5a	-0.372008	0.456996
	Eif5b	-0.491944	1.34929			Eif5b	-0.312313	0.399921
	Eif6	-0.492222	1.10685			Eif6	-0.478557	0.706028
	Elac2	-0.48053	1.2137			Elac2	-0.514189	0.630071
	Elavl1	-0.207746	0.44187			Elavl1	-0.352033	0.524333
	Elf1	-0.785444	0.608425			Elf1	0.230302	0.13116
	Elf2	0.704541	1.0881			Elf2	-0.200039	0.205585
	Elf4					Elf4	0.763171	0.365966
	Ell	-0.712434	1.77424			Ell	-0.686767	1.06883
	Elmo1	-0.464642	1.12495			Elmo1	-0.509398	0.729101
	Elmo2	0.497464	0.71589			Elmo2	-0.061762	0.0652288
	Elmo3					Elmo3
	Elmod2	0.0590189	0.0490564			Elmod2
	Elmsan1	-0.166546	0.190724			Elmsan1	0.153247	0.11528
	Elof1	0.249208	0.416854			Elof1	-0.35138	0.375534
	Elovl1	-1.66096	0.852158			Elovl1	2.40456	0.602106
	Elovl5	-1.02279	0.888462			Elovl5	-0.676056	0.41799
	Elovl6	-0.336394	0.533159			Elovl6
	Elp2	-0.512541	0.935213			Elp2	-0.663288	0.717202
	Elp3	-0.607352	0.895167			Elp3	-0.550676	0.663837
	Elp4	-0.162968	0.249029			Elp4	-0.597014	0.883223
	Elp5	-0.513815	0.860882			Elp5	0.30216	0.204867
	Elp6	-0.634723	1.35093			Elp6	-0.181661	0.168169
	Eltd1	-0.359053	0.179086			Eltd1
	Emb	0.468393	0.529083			Emb	-0.289087	0.310337
	Emc1	-0.600447	1.21903			Emc1	-0.110562	0.134681
	Emc10	-0.416661	0.241919			Emc10	-2.01513	1.32959
	Emc2	-0.32012	0.513044			Emc2	0.161176	0.106098
	Emc3	-0.130826	0.103471			Emc3	0.0322075	0.0319922
	Emc4	-0.259297	0.465068			Emc4	-0.456081	0.395568
	Emc6	0.810639	1.16192			Emc6	1.0874	0.820361
	Emc7	-0.001032	0.00131858			Emc7	-0.856451	0.978091
	Emc8	-0.629794	0.909796			Emc8	-0.295377	0.367379
	Emd	0.131028	0.126966			Emd	0.330666	0.287339
	Emg1	-0.181939	0.274431			Emg1	-0.708688	1.13409
	Eml2	-0.000791	0.00098445			Eml2	0.126349	0.131493
	Eml3	-0.548547	1.32863			Eml3	-0.180127	0.158721
	Eml4	-0.541793	0.590406			Eml4	0.0257314	0.0251462
	Eml4	-0.522387	1.26279			Eml4	-0.558151	0.499816
	Emsy	-1.19001	1.40643			Emsy	0.0615901	0.0395208
	Endog	-0.432025	0.820736			Endog	-0.598907	0.824202
	Eng	-1.57473	1.60872			Eng
	Engase	-0.462445	0.31674			Engase	-0.0668297	0.0511042
	Enkd1	-0.390578	0.320576			Enkd1	-0.20806	0.219514
	Eno1	-0.240893	0.453089			Eno1	-0.199585	0.211188
	Eno3	0.401444	0.643579			Eno3	0.0829574	0.076457
	Enoph1	-0.942671	1.87938			Enoph1	-0.11269	0.11223
	Enpp1					Enpp1
	Enpp4	-0.837601	0.779252			Enpp4	2.30636	0.583257
	Enthd2	-2.20037	1.91234			Enthd2	-1.59978	0.816068
	Entpd5	-0.511962	0.753582			Entpd5	-0.131393	0.138603
	Entpd6	0.00530459	0.00474265			Entpd6	-0.302293	0.225201
	Eny2	-0.397753	0.272011			Eny2	-0.277369	0.250978
	Eogt	0.350183	0.13874			Eogt	0.74586	0.902382
	Eomes	-1.28406	2.1862			Eomes	-1.05963	1.30709
	Ep300	-0.0056795	0.00546806			Ep300	0.208346	0.129142
	Ep400	0.432855	0.696814			Ep400	-0.164405	0.140663
	Epb41	-0.215308	0.412781			Epb41	-0.044769	0.0403659
	Epb41l1					Epb41l1
	Epb41l2	-0.228452	0.440748			Epb41l2	-0.22992	0.266963
	Epc1	0.281082	0.223275			Epc1	0.561207	0.710103
	Epc2	0.25601	0.170774			Epc2	-1.61798	0.953009
	Epg5	-0.775352	0.428452			Epg5	-1.18316	0.427754
	Ephx1	-0.456894	0.518056			Ephx1	-0.11184	0.125202
	Epm2aip1	-0.883255	1.4884			Epm2aip1	-1.0802	1.06028
	Epn1	0.0364625	0.0173825			Epn1	-0.479764	0.242878
	Eppk1	2.85619	1.33678			Eppk1	1.55316	0.628986
	Eprs	-0.279134	0.695293			Eprs	-0.320973	0.421949
	Eps15	-0.442155	0.693132			Eps15	-0.46132	0.496283
	Eps15l1	0.165928	0.284158			Eps15l1	-0.214292	0.201334
	Epsti1	0.288469	0.422732			Epsti1	-0.687061	0.435424
	Ept1	-0.0941571	0.105207			Ept1	-0.425884	0.647964
	Eral1	-0.157839	0.311082			Eral1	-1.64486	0.630423
	Erap1	0.00746117	0.00948424			Erap1	-0.1058	0.118701
	Erbb2ip	0.0806106	0.105282			Erbb2ip	0.148535	0.133753
	Erc1	0.0679315	0.0438173			Erc1	0.392702	0.21667
	Erc2	3.50065	0.566297			Erc2	0.0426766	0.0342199
	Ercc1	0.271085	0.211257			Ercc1	0.930357	0.418425
	Ercc2	-1.75322	1.77544			Ercc2	0.215552	0.164488
	Ercc3	-0.357482	0.801322			Ercc3	-0.172282	0.237746
	Ercc4	-0.151625	0.263587			Ercc4	-0.0722645	0.0723228
	Ercc5	-0.902827	0.728033			Ercc5	-1.74133	0.729557
	Ercc6	-1.02176	1.63793			Ercc6	-1.34236	1.05145
	Ercc6l	-0.432802	0.784193			Ercc6l	-0.564623	0.939505
	Ercc8	0.584963	0.412804			Ercc8
	Erf	0.494526	0.823279			Erf	-0.600448	0.736347
	Ergic1	-0.583711	1.42574			Ergic1	-0.196544	0.17134
	Ergic2	0.43202	0.390135			Ergic2	0.470699	0.463919
	Ergic3	-0.900609	2.12591			Ergic3	-1.10939	0.967306
	Erh	-0.745376	0.576731			Erh	-0.829701	0.948202
	Eri1	-0.255232	0.441086			Eri1	-0.318283	0.342779
	Eri3	-0.796944	0.4494			Eri3	1.08986	0.589386
	Erich1	0.0272645	0.0146687			Erich1	-0.4401	0.475418
	Erlec1	-2.6547	1.71233			Erlec1	0.644473	0.487777
	Erlin1					Erlin1
	Erlin2	-0.135218	0.16094			Erlin2	-0.0100248	0.0101669
	Ermp1	-0.355614	0.835605			Ermp1	-0.219842	0.287424
	Ero1l	-0.577195	0.680701			Ero1l	-0.441259	0.433375
	Ero1lb	-0.379928	0.498328			Ero1lb	0.649652	0.477464
	Erp29	-0.0625705	0.0920376			Erp29	-0.127879	0.147823
	Erp44	-0.0093409	0.0151861			Erp44	-0.225861	0.316165
	Esco1	-1.44074	1.33791			Esco1	-0.931367	0.826184
	Esco2	0.0262461	0.0336611			Esco2	0.311479	0.240695
	Esd	-0.525955	0.787599			Esd	-0.065759	0.0602677
	Esf1	-0.675696	1.08064			Esf1	-0.259044	0.342662
	Espl1	-0.565556	0.991611			Espl1	-1.17021	1.771
	Esrra	-1.13369	0.622169			Esrra	0.280289	0.192196
	Esyt1	-0.306797	0.425362			Esyt1	-0.0903034	0.0962496
	Esyt2	-0.588198	1.09403			Esyt2	-0.506346	0.541609
	Etf1	-0.037771	0.0602125			Etf1	-0.297562	0.444845
	Etfa	-0.543304	0.881123			Etfa	-0.109997	0.127812
	Etfb	-0.0783372	0.120948			Etfb	-0.191232	0.240159
	Etfdh	-0.0275296	0.0348993			Etfdh	0.186924	0.231914
	Ethe1	-0.0249271	0.0398121			Ethe1	0.292965	0.319825
	Etnk1	-0.11272	0.161113			Etnk1	-0.0418434	0.0361724
	Ets1	-0.790847	1.43676			Ets1	-0.0055095	0.00545793
	Etv3					Etv3	1.09308	0.800723
	Etv6	-1.89392	1.09547			Etv6	-0.766072	0.689955
	Eurl	-1.44964	0.835401			Eurl	0.188354	0.183668
	Evi2a					Evi2a
	Evi2b	-0.638254	0.461773			Evi2b	-0.52726	0.281214
	Evi5l	4.97529	2.33353			Evi5l
	Evl	0.105415	0.208365			Evl	-0.163194	0.220793
	Ewsr1	-0.0447838	0.0657776			Ewsr1	-0.426678	0.505274
	Exd2	0.838093	0.404036			Exd2	-0.100182	0.110458
	Exo1	-0.501536	0.505901			Exo1	-0.442573	0.208346
	Exoc1	-0.0361627	0.0247294			Exoc1	-0.297676	0.406627
	Exoc2	0.013572	0.0153292			Exoc2	-0.0667775	0.0738406
	Exoc3	-0.286119	0.585045			Exoc3	0.563632	0.949222
	Exoc4	-0.24751	0.446402			Exoc4	-0.22394	0.213382
	Exoc5	-0.679513	0.899498			Exoc5	-0.440945	0.674376
	Exoc6	-0.225868	0.218599			Exoc6	0.136818	0.176402
	Exoc6b	-0.929707	0.997376			Exoc6b	-0.995816	1.58957
	Exoc7	-0.374342	0.777166			Exoc7	-0.538382	0.78483
	Exoc8	-0.404019	0.768865			Exoc8	-0.188267	0.208668
	Exog	-0.293648	0.495653			Exog	-0.306476	0.442784
	Exosc1	0.197483	0.378986			Exosc1	-0.400263	0.634055
	Exosc10	-0.184217	0.343152			Exosc10	-0.318573	0.384098
	Exosc2	-0.268651	0.644715			Exosc2	0.250933	0.348213
	Exosc3	0.399656	0.483508			Exosc3	-0.207834	0.276235
	Exosc4	0.262404	0.481281			Exosc4	-0.249413	0.295517
	Exosc5	-0.495823	0.889471			Exosc5	-0.240554	0.305572
	Exosc6	-0.212357	0.394476			Exosc6	-0.393933	0.492019
	Exosc7	0.120058	0.107169			Exosc7	-0.572199	0.773187
	Exosc8	-0.194478	0.448197			Exosc8	-0.52305	0.826868
	Exosc9	-0.689183	1.17733			Exosc9	-0.0832603	0.0999284
	Ext2	-0.2622	0.130871			Ext2
	Extl3	1.20581	0.837869			Extl3	-0.245893	0.11259
	Eya3	-0.508668	0.906279			Eya3	-0.108055	0.0876179
	Ezh1	-0.645185	1.08369			Ezh1	0.0202908	0.0164847
	Ezh2	-0.190412	0.278639			Ezh2	-0.110099	0.0902106
	Ezr	-0.124957	0.24303			Ezr	0.0993291	0.114049
	F13a1					F13a1	1.16198	0.481061
	F8a1	0.852222	0.901832			F8a1	1.55534	1.01141
	Faah	0.279088	0.188602			Faah	0.294949	0.293872
	Faap100	-0.211501	0.324811			Faap100	0.686176	0.846819
	Faap24	-1.46837	0.616313			Faap24	0.945718	0.742388
	Fabp5	-0.450821	0.866737			Fabp5	-0.20315	0.234423
	Fadd	1.51958	1.31061			Fadd	-0.90552	0.427446
	Fads1	-0.431363	0.813105			Fads1
	Fads2	-0.68995	0.340829			Fads2
	Faf1	-0.0534707	0.0820558			Faf1	-0.722556	0.902286
	Faf2	-0.472191	1.26011			Faf2	-0.208283	0.256332
	Fah	-0.437445	0.220756			Fah	-0.60386	0.365785
	Fahd1	0.784017	0.64647			Fahd1	-0.474268	0.363053
	Fahd2	0.205092	0.310876			Fahd2	0.280137	0.257744
	Faim	0.145957	0.161159			Faim	1.96019	1.01725
	Fam101b	0.555779	0.567901			Fam101b	-0.551648	0.539935
	Fam102a					Fam102a	0.554738	0.40236
	Fam103a1					Fam103a1
	Fam104a	-0.310643	0.373165			Fam104a	0.151724	0.113891
	Fam105a	0.623599	0.786192			Fam105a	1.24447	1.27346
[truncated: 5,428 more rows]

## Sheet: 1I
		% of initial cells
	Time (days)	WT				WT + rapa				Pim dKO			Pim dKO + rapa
	0	100	100	100	100	100	100	100	100	100	100	100	100	100	100
	1	100.787	96.6343	90.2328	90.0486	98.7132	91.993	88.1938	86.5316	94.2042	86.6592	90.0071	93.2645	89.0966	87.4961
	2	99.3583	94.1126	91.9743	86.0255	95.3255	87.8582	83.1526	84.9805	85.6706	82.2378	86.6994	78.5481	83.4732	81.9585
	3	97.73	84.9959	79.3793	82.2555	97.3471	77.8998	70.1113	82.2251	80.0102	77.3896	79.5083	75.6494	69.8619	75.7554

## Sheet: 1J
		Mean division number
	Time (hours	WT				Pim dKO				WT				Pim dKO
	45	2.07503	1.94345	2.00502	1.8944	1.87158	1.90429	1.76178	1.8799	1.09727	1.14888	1.18854	1.14847	1.09573	1.13157	1.14213	1.16236
	69	3.28471	3.33044	3.34838	3.33511	3.3123	3.2403	3.04829	3.09577	1.90898	2.28286	2.24994	2.11991	1.85821	1.8733	1.93199	1.98479
