# Supplementary material for: PIM kinase control of CD8 T cell protein synthesis and cell trafficking
Source: eLife. 2025 May 13;13:RP98622. doi: 10.7554/eLife.98622 (PMC12074636; doi:10.7554/eLife.98622)
Supplement: Figure 2—source data 3. [file elife-98622-fig2-data3.xlsx]

## Sheet: 2C
	CD8 T cell numbers
	Time (Days)	IL15 WT				IL15 dKO
	2	1249685	1507436	1077759	1071373	1028110	1240436	1314866	1163077
	3	8105659	7661845	4296692	4702187	4944268	4769283	5444439	5065404
	4	28572502	26459504	1.79601e+07	1.98047e+07	11926816	11996265	9.50184e+06	9.23445e+06
	5	53201523	60898285	5.61153e+07	4.74319e+07	15527326	19986648	2.14992e+07	1.53918e+07
	6	133152885	136789590	9.04203e+07	8.82575e+07	30603687	32586484	2.67044e+07	2.44596e+07

## Sheet: 2D
	% live cells
	Time (days)	WT					Pim dKO
	day 4	79.4	78	75.4	69.5	73.8	80.9	80.1	75.4	79.1	79.5
	day 6	85.7	87.2	81.9	80.3	84.8	86.6	87.5	77.9	85.5	83.5

## Sheet: 2E
		IL15 WT dKO ave TPM	IL15_dKO_v_WT_log2FC_all_mRNA	IL15_dKO_v_WT_log2FC_upreg_mRNA	IL15_dKO_v_WT_log2FC_downreg_mRNA
	Zbtb32	25.7	0.333342
	Gramd3	223.5	-0.225289
	Lta	39.8	0.359829
	Ms4a6b	560.9	-0.338734
	Rgs10	120.4	-0.0910212
	Resf1	111.9	-0.277713
	Irf8	26.6	0.140966
	Slfn2	759	-0.24686
	Trp53i11	73.8	0.193652
	Itgav	15.3	-0.15247
	Pcx	3.7	0.0677103
	Card6	66.8	-0.107912
	Ipcef1	154.8	-0.169047
	Rere	27	0.0765503
	Nsg2	77.5	0.12051
	Slfn1	344.1	-0.592452
	Tnfaip8l2	211.5	-0.0223919
	Itga4	59.1	-0.164527
	Ms4a4b	494.1	-0.399451
	Trp53inp1	277.3	-0.152603
	Lgals9	340.7	-0.016822
	Ergic1	32.9	0.137463
	Lyst	70.2	-0.137658
	Sp100	189.2	-0.232529
	Bcl2l11	180.7	-0.121885
	Arhgap25	97.2	-0.0293291
	Pde3b	140.5	-0.290107
	Ssh2	61.4	0.143287
	Sesn1	106.3	-0.303053
	Ifi203	113.8	-0.346155
	Madd	106.1	-0.114741
	Limd2	396.7	-0.0134122
	Slc16a6	36.8	-0.0275509
	P2ry10	230.9	-0.0922078
	Treml2	74.2	0.230634
	St3gal6	61.2	-0.347791
	Sh3bp5	174.2	-0.073271
	Ccl5	464.5	0.025378
	Lrrc32	13.8	0.682206
	Add3	146.6	-0.134086
	Slc7a5	199.3	0.272664
	Tnfrsf26	120.2	0.00373043
	Nod1	41.1	-0.351511
	4930523C07Rik	52.5	-0.162856
	Arhgef3	204.4	-0.17682
	Tent5c	40.8	-0.377732
	Gimap6	438.8	-0.271757
	Ripor2	53.2	-0.162868
	Tmem71	109.1	-0.182565
	Gm2682	169.1	-0.465536
	Cerk	55.4	0.16015
	Btg2	138.3	-0.0451393
	9930111J21Rik2	33.2	-0.176997
	Jarid2	22.8	0.136172
	Hsd17b7	16.3	-0.109193
	Ctss	202.2	-0.0614339
	Crlf3	172.8	-0.20355
	Gzmb	2618.2	-0.266979
	Dusp6	25.9	0.00167323
	Peli1	144.8	0.0133452
	Sla	94.4	-0.207894
	Rasa3	286.3	-0.0861632
	Cd226	135.3	-0.411814
	Rara	49.5	0.371274
	Mbp	80.5	-0.0555707
	S1pr1	397.7	0.121232
	Trim56	50.2	-0.122362
	Mndal	137.8	-0.267133
	Slc39a14	12.1	0.0226193
	Pdcd4	378.9	0.0126578
	Actn1	52	-0.0553781
	Camk1d	36.1	-0.0932197
	S1pr4	220.9	0.215128
	Klf3	41	0.00607715
	Spred1	5.7	0.419488
	Ccng2	79.1	0.101801
	Cd6	66.8	-0.158413
	Ctdsp2	83.9	-0.0289928
	Tcf7	757.3	0.0517832
	Serpinb9	36.7	-0.220577
	Slc35c2	24.3	0.122648
	Sypl	6.7	0.0180024
	Tbc1d4	10.1	-0.273365
	Elf1	228.7	-0.114564
	Lrp8	10.7	0.295998
	Il12rb1	37.5	-0.113424
	Pde4d	31.1	0.089103
	Bcat1	5.7	0.290636
	Ifitm3	64.5	-0.199169
	Gstp3	196.3	-0.15187
	Ifi208	91.2	-0.351397
	Cyria	18.4	-0.391259
	Pfkl	20.2	0.280138
	Dgka	279.7	-0.131469
	Pde4b	29.8	0.076273
	Sh3bp2	20.8	-0.0342206
	Nfkbia	112.8	-0.0167308
	AB124611	133.6	-0.0335222
	Tnfrsf9	101.2	-0.151447
	Fosl2	11	0.140559
	Abcb9	35.5	0.0555388
	Emb	167.5	-0.163452
	H2az2	210.1	0.0723445
	Sh2d5	8.3	-0.306237
	Cdkn1a	21.1	-0.113013
	Abhd17c	15	0.240573
	Gadd45g	36.6	0.174836
	Ctsw	930.7	-0.0420268
	Cd5	60	-0.139548
	Hk2	12.1	0.213316
	Mapk6	57.8	-0.0356925
	Adgre5	255.9	-0.153294
	Mycn	11.6	0.384449
	Icosl	4.3	-0.184162
	Gpd2	28.2	-0.0918982
	Rora	6	-0.377913
	Arrdc3	32.7	-0.269159
	Stk39	72.2	-0.0269647
	Fam78a	281.4	0.0437595
	Rasa2	12	0.0483252
	Samd3	49.2	-0.455208
	Akap13	182.3	0.0586148
	Pink1	60.6	0.0656719
	Selenop	64.7	-0.548483
	Klhl6	316.4	-0.185004
	Prmt5	140.5	0.0636132
	Rhbdf2	8.1	0.0513931
	Mapre2	40	-0.171539
	Snx20	22.7	0.0474617
	Nt5e	92.3	0.0369905
	Inpp4b	213.1	-0.113251
	Shmt1	46.3	0.179698
	Lpxn	333.6	-0.175562
	Tex2	40.9	0.182415
	St8sia4	13.9	-0.313055
	Cxcr3	372.1	-0.194303
	Zfp874a	12.5	-0.138394
	9930111J21Rik1	18.4	-0.0780146
	Hcst	223.4	-0.153395
	1600014C10Rik	67.8	-0.156807
	Gpbp1l1	122	0.00736704
	Prkcb	39.5	-0.168098
	Il16	138.1	-0.170499
	Slc39a8	9	-0.183094
	Bnip3	17.4	0.144864
	Xbp1	78.3	-0.124415
	Cmah	38	-0.0754
	Stk38	74.3	-0.160699
	Samhd1	253.8	-0.31007
	Tlr1	34.4	-0.501745
	Cxcr4	111.8	0.202631
	Gpr174	35.5	-0.482093
	Il2ra	232.5	0.171399
	Sun2	314.6	0.0344391
	Fgf13	38.3	0.0463042
	Ldlrap1	27.6	0.228557
	Atp2a2	141.3	0.0307222
	Gimap4	2018.8	-0.242571
	P2ry14	6.8	-0.171877
	Hivep2	38.1	0.00266403
	Hif1a	96.3	0.00905958
	Cdkn1b	140.8	0.133003
	Orai2	60.3	-0.0460834
	Atp10d	15.4	-0.159608
	Dipk1a	49.5	-0.0545163
	Etv3	23.5	0.124801
	Ifi213	14.2	-0.62844
	Gvin3	122	-0.367372
	Sesn2	14.2	0.157675
	Atp1b3	739.9	-0.130817
	Hbp1	43.4	0.102232
	Hmgcr	86.8	-0.0174914
	Sorl1	77.6	-0.247679
	Cd8b1	1535.2	-0.131572
	Slc3a2	129.8	0.186485
	Mapkapk2	173.2	-0.0202888
	Mthfd2	89.7	0.0566649
	Nipal3	50.1	0.0559517
	Dse	35.5	-0.27501
	Mxd4	65	0.140225
	Cep97	29.1	-0.0313094
	Rhoq	16.2	-0.206753
	Aldh18a1	86.3	0.0303193
	Arhgef2	39.9	0.04408
	Bcl2l1	50.3	0.00547551
	Fam189b	67.5	-0.0509179
	B4galt1	300.4	-0.0877732
	Eaf1	52.4	0.0822206
	Cd27	196.1	0.0254049
	Slc14a1	26.2	-0.0323812
	Rb1cc1	24.6	-0.11941
	Adora2a	34.9	-0.141509
	Nedd9	102.4	-0.149356
	Sash3	689.7	-0.0883099
	Sntb2	32.3	-0.0694836
	Hid1	34.4	-0.259745
	Ccm2	94.7	-0.0644443
	Ifnar1	116.8	-0.173964
	Sgsh	42	-0.0679039
	Gcnt2	1.3	0.477804
	Tmem59	250.5	0.0749857
	Maml2	25.2	0.0923903
	Gab3	28.5	-0.406493
	Tasp1	35.2	-0.122694
	Crebrf	41	0.0199605
	Nrros	53.7	-0.0902315
	Bcr	11.8	-0.0642517
	Map3k3	101.9	-0.0425398
	Hexb	117.6	-0.142747
	Ifi47	471	-0.343154
	Etfbkmt	47.4	-0.109412
	Pik3r5	175.5	-0.068409
	Ybx3	234.4	0.204925
	Shmt2	243.6	0.264146
	Nek6	9.2	0.0332861
	Fam20a	1.7	-0.0551837
	Nin	76.2	-0.0954032
	Rab37	63.4	-0.133732
	Eea1	17.3	-0.0520237
	Ets1	422.4	-0.12061
	Nr3c1	57.4	-0.011985
	Cnot6l	84.1	-0.125218
	Ncoa3	101.5	-0.0477826
	Tuba4a	163.2	-0.0040202
	Oxr1	31.8	-0.169054
	Zfp874b	24.4	-0.0441367
	Cdc25a	20.6	0.0547156
	Ifi209	196.7	-0.721995
	Chsy1	154.3	-0.238179
	Ifngr1	894	-0.0656285
	Stk40	48.8	0.135304
	Midn	52.1	0.225938
	Satb1	72.9	-0.0180569
	Tnf	46.9	-0.251479
	Crip1	546.7	-0.10597
	Slc25a45	53.1	-0.0333655
	Lrig1	29.9	0.0177701
	Trim16	7.3	-0.264744
	Ccdc117	50	0.0745663
	Gvin-ps7	272.7	-0.172162
	Tgfb1	94.9	0.397935
	Arhgef18	39.9	-0.0332479
	Pde7a	62.1	-0.214589
	Sp110	103.7	-0.0938659
	Slc43a2	31	-0.167717
	Slc1a5	177	0.115548
	Dusp4	3.7	0.727685
	Etv5	1.7	0.543655
	Crebl2	14.9	-0.0988389
	Pxk	46.6	-0.0653345
	Atf4	231.9	-0.009767
	Smpdl3a	57	0.202403
	Ccni	269.3	-0.0297247
	Cd84	40	-0.211717
	Stk4	292.2	-0.129908
	Ypel3	100.2	0.180318
	Ikzf4	9.9	0.422049
	Ksr1	9.9	0.225483
	Ppp1r3b	8.7	0.224414
	Neurl3	197.4	-0.190664
	Trim59	232.9	-0.170611
	Ust	10.7	-0.129891
	Cyth3	13.7	-0.143388
	Twf2	198.9	0.0773206
	Slc2a1	45.5	-0.0063941
	Car12	8.7	0.291033
	Axin2	15.9	-0.0646698
	Stk10	227.9	0.0320216
	Sik1	9.7	0.111918
	Bhlhe40	96.7	-0.260342
	Hyou1	60.9	0.0172777
	Lonp1	81.9	0.106848
	Themis	89.8	-0.169343
	Phf11c	30.7	-0.230695
	Psap	567.2	-0.0063558
	Tbxa2r	54.8	0.225671
	Ccr7	273.8	0.449636
	Ltb	419.5	0.148479
	Ptpre	8.3	-0.0776092
	Gpd1l	64.4	-0.0162666
	Hsp90ab1	3594.2	0.124249
	Serpine2	2.6	-0.293257
	Itpkb	74.8	0.151314
	Srm	187.6	0.151855
	Ube2h	81.1	-0.233598
	Elk4	85.5	-0.0006119
	Rassf2	50.1	-0.100502
	Gimap7	206.5	-0.537314
	Inpp5k	48.7	-0.0021111
	Tsc22d3	63.2	0.156985
	Hsp90aa1	392.1	-0.115871
	Eps8	0.9	-0.395755
	B4galt5	131.2	-0.0222662
	Spred2	25.4	0.189505
	Neb	2.3	-0.383026
	Acss1	39.4	-0.0034696
	Rnf167	80.2	-0.0023713
	Gm45552	105.3	-0.204232
	Kat2b	46	-0.111366
	Vash1	8	-0.0176181
	Rnpep	22.1	0.128653
	Emilin2	10.4	0.0786462
	Rassf1	40.5	0.136438
	Septin9	252.7	-0.0465496
	Rhoh	48.2	0.00791941
	Prkch	212.5	-0.0965685
	Aff3	27.5	0.27354
	Klf7	15.4	-0.0476603
	Susd6	52.6	-0.013369
	Syne1	7.3	-0.0057847
	Fam169b	75.2	0.0368947
	Hspd1	409.1	0.00504366
	Tjp1	2	-0.306471
	Phf11b	83.7	-0.303115
	Capg	56.4	0.116523
	Golph3l	70	-0.0576201
	Asns	27	-0.0961511
	Fndc3a	38	-0.0268807
	Lif	4.2	0.332281
	Ldlr	21.2	0.179833
	Gsap	10.6	-0.335274
	Nomo1	69	0.123852
	Cdv3	74.5	-0.0065963
	Ifi27l2a	432.5	-0.388751
	Gmfg	202	-0.208589
	Otulinl	121.8	-0.129886
	Dot1l	49.9	0.25783
	Plcxd2	50.4	0.107811
	Arfgef3	0.3	0.562485
	Tbc1d2b	41.4	-0.0166525
	Ddx20	39.4	0.00386211
	Manf	82.3	-0.0149936
	Tfrc	206.4	0.0266055
	Klhl24	28.2	0.20238
	Zc3h12d	44.4	-0.0636995
	Gm8369	33.5	-0.195596
	Ttyh3	47.5	0.132756
	Fam117a	62	0.170411
	E2f3	28.7	0.152511
	Lrp12	16.5	0.0931478
	Il10rb	70	-0.211637
	Trim30a	67.4	-0.283148
	Chd3	122.6	0.0379265
	Cd52	2313.5	-0.211894
	Ezh1	39.3	-0.0600017
	Rftn1	90.8	-0.0707152
	Golm1	131.2	-0.0515816
	Hipk1	158.3	-0.0860004
	Slamf6	13.1	-0.0320775
	Tmem131l	34.4	0.0757023
	Tnrc6b	20.4	-0.100173
	Sytl3	19.8	0.0423091
	Tprgl	176.4	0.0322676
	Trim34a	46.6	-0.288834
	Ighm	483.2	0.153523
	Glul	93.3	-0.0397766
	Tspan13	131.6	0.113675
	Mafg	15.9	0.426288
	Retreg3	153.7	-0.0095852
	Zfp53	55.9	-0.095689
	Ero1a	36.9	-0.044702
	Arf6	480.8	-0.076007
	Pfkp	103.4	0.0255434
	Asap1	35.2	0.122725
	Tagap	33	0.0681685
	Tnfaip8l1	13.4	-0.0343578
	Hdhd5	48.1	0.00722568
	Extl3	29.2	0.166265
	Nfe2l1	53.3	0.0514727
	Nampt	53.1	0.00760876
	Mpp1	47.9	-0.0327798
	Ube2m	126.6	0.122285
	Samd9l	152.1	-0.287031
	Fyb	162.9	-0.114744
	Mbnl1	322.8	-0.0671817
	Nfil3	48.2	-0.165069
	Il2rb	930.2	0.0066952
	Zfp395	37.7	0.203774
	Ifi206	138	-0.49578
	Slc12a4	19.3	0.102895
	Faah	39	0.0578892
	Scml4	20.8	-0.283041
	Morf4l2	113.5	0.034693
	Usp28	31.9	-0.0754767
	Gimap9	260.5	-0.194142
	1700025G04Rik	31.3	-0.0189949
	Tdrp	14.1	0.172836
	Stmn1	420.2	0.0785788
	Gsr	100.8	0.0633989
	Slc12a7	20.5	-0.214671
	Tcp11l2	50.7	-0.0385991
	Cytip	188.1	0.0327597
	Ap3m2	28.4	-0.167091
	Adgrl1	25.6	0.279911
	Lss	22.4	0.0415541
	Stk17b	493.7	-0.0784937
	Top2b	147.3	-0.196767
	Firre	3.8	0.152689
	Gm11346	30.2	0.142661
	2810013P06Rik	33.5	-0.037694
	Rapgef6	131.8	-0.197278
	Nsd3	72.9	-0.0593889
	Rtn4rl1	21.9	-0.175523
	Sfxn3	73.7	0.113998
	Pgm1	45.5	0.101886
	Lamc1	14.7	0.3353
	Gcnt1	6.7	-0.441725
	Ampd2	49.5	0.372196
	Rmnd5a	102.7	0.0229798
	Fkbp1a	156.6	-0.0052476
	Serpinb6b	30.1	0.109251
	Slc20a1	149.2	-0.101881
	Pak6	10.2	-0.467715
	Zfp260	47.6	-0.048855
	Mettl27	13.7	0.122295
	Gnaq	7.3	0.195323
	Exoc3l	3.9	-0.0356458
	Arhgap45	707.6	0.0567086
	Gpr55	30.7	-0.0487653
	Fut4	1.9	0.299507
	Pdlim7	4.8	0.132472
	Zfp36l1	140.8	0.210609
	Hemk1	13.9	-0.181781
	Cd7	133.7	0.0944333
	Reck	33.2	-0.0370427
	Mpp6	36.4	-0.0126487
	Sfn	97.8	0.224295
	Rnpepl1	24.9	0.193816
	Ppm1h	65.7	-0.140138
	Inf2	28.6	-0.160751
	Ifitm2	69	-0.134807
	Pilrb1	7.9	-0.447511
	N4bp2l1	38.4	0.0759791
	Rhof	72.4	-0.0286097
	Zfp141	26.6	-0.0562551
	Entpd5	61.6	-0.0963842
	Ubtd1	12.7	0.397
	Spata13	161.7	-0.129293
	Saraf	521.9	-0.0176513
	Dyrk2	54.9	-0.0783736
	Prf1	26.4	-0.411433
	Tnfsf10	48	-0.165676
	Adap1	40.4	0.0329222
	Ctdsp1	121.9	0.105716
	Cars	21.3	-0.0464585
	Rrbp1	38.6	0.0614189
	Nek7	120.1	-0.168312
	Klf13	119.3	-0.0507384
	Notch1	41.3	0.134651
	Cpeb4	18.6	-0.147075
	Alcam	6.6	-0.0360446
	Myo19	4.7	0.0384801
	Iars	112.4	-0.0256123
	Clec2d	239.8	-0.197497
	Capn2	101.7	-0.311378
	Ppan	44.5	0.3117
	Ptpn22	220.6	-0.173624
	Ell2	2.3	-0.186278
	Swap70	3.9	-0.333512
	Arl5c	63.8	0.150459
	Slc7a1	63.2	0.161697
	Pdcd1lg2	6.6	-0.0394645
	Fcho2	14.9	-0.344969
	Tmem50a	407.2	-0.173943
	Rnf38	70.6	0.0513823
	Amz2	31	-0.147149
	F2rl1	51.2	-0.306129
	Acsl4	94.1	-0.164918
	Sft2d2	68	-0.0960633
	Foxo3	36.2	0.0700156
	Tbc1d16	33	-0.0402447
	Paip2	135.5	0.0606952
	Ccnd2	166.2	-0.0039572
	Prkcz	18.1	-0.269155
	Nbr1	53.7	-0.0606265
	Klf2	181.7	0.696543
	1110038B12Rik	46.2	0.403518
	Vps54	94.9	-0.141333
	Glipr1	139.9	-0.177395
	Xcl1	114.4	0.0306634
	Creld2	71.9	0.0395625
	Cracr2a	30.1	0.0366294
	Tirap	3.1	-0.261189
	Ifnar2	76.3	-0.147589
	Tnfrsf22	14	-0.284688
	Fbxl20	21.4	0.0558643
	Lats2	7.9	-0.107824
	Ptpn7	143.4	-0.0144312
	Hdlbp	85.4	0.00715248
	BC043934	18.2	-0.328466
	Havcr2	2.8	-0.245532
	Gimap3	886.6	-0.089627
	Lbh	142	0.0642507
	Timm17a	20.3	-0.0661058
	Rrp1b	49.6	0.175157
	Ptpn6	492.7	-0.0358233
	Gnptab	81.2	-0.0018361
	Kif21b	138.4	0.0228328
	Cotl1	2114.7	0.0753395
	Tspyl1	118.3	0.0311221
	Kbtbd11	150	-0.0193012
	Slc19a2	17.6	0.0680734
	Ccr4	5.4	-0.128699
	Prkacb	161.7	-0.114477
	Gmds	26.7	-0.0539745
	Trib3	10.3	-0.012372
	6530402F18Rik	9.7	0.0123565
	Ctso	23.6	-0.0958645
	Nolc1	214.4	0.108659
	Jmy	15.7	0.235598
	Ms4a4c	36.7	-0.956047
	Larp1	251.5	0.0755985
	Mylip	49.3	0.0697582
	Foxp1	61.8	-0.0579561
	Msmo1	25.2	-0.0869971
	Tmem106b	43.3	-0.0431055
	Pdia6	142	-0.0871616
	Agpat5	14.6	0.03086
	Nars	159.8	-0.0907237
	Esco2	47.2	-0.0624127
	Larp4	40.3	0.0150603
	Tnfsf8	150.2	-0.0214069
	Ctps	77.3	0.0990639
	Ehbp1l1	22.4	0.0111345
	Utp4	88.9	0.109898
	Mat2b	98.6	0.0114866
	Rab27a	91.7	-0.170805
	Myo1c	25.6	0.212842
	Cdkn2a	25.8	0.064031
	Slco4a1	9.1	-0.0547255
	Arhgef7	15.5	0.156065
	Pgam1	55.5	-0.195914
	Rps6ka1	152	-0.0620498
	Itm2b	597	-0.126841
	Dyrk4	20.1	0.326983
	Inka2	6.4	-0.091452
	BC147527	34	-0.37723
	Acp5	186.4	-0.097037
	BC035044	28.6	-0.0700195
	Pank3	42.1	-0.058314
	Ccng1	286.8	-0.132126
	Gvin2	12.3	-0.332423
	Lyar	105.6	0.0751198
	Itpr2	15.1	0.031317
	Unc93b1	19.7	0.0614081
	Tnfsf11	8	-0.18849
	Fam160a2	12.9	-0.016046
	Map2k3	85.6	0.0580799
	Clic4	83.4	-0.0552685
	Cdk17	90.6	-0.187518
	Mt1	53.3	-0.111902
	Cyth1	134	0.0912984
	Skap1	179	-0.0962485
	Arhgap15	57	-0.0169187
	H2-DMa	40.8	0.348193
	Tmem50b	43.5	-0.160313
	E2f4	260.2	0.0964415
	Pgd	54.2	-0.0186448
	Xpot	59.2	-0.0007289
	Slc16a3	5.9	0.266045
	Ssbp2	17.5	-0.155995
	Ikbkb	34.9	-0.0727361
	Mt2	79.7	-0.225661
	Il21r	148.8	0.0844312
	Tbrg4	79.6	0.175792
	Sntb1	11.3	-0.319937
	Mgst2	51.4	-0.198287
	Arhgap21	17.8	0.107101
	Eef1e1	33.7	-0.0128816
	Zfp386	26.6	-0.0398493
	Edem2	37.2	0.00453202
	Aco2	222.6	0.0694736
	Nab2	44.4	0.25197
	Lman1	29.2	0.0355601
	Polr3d	21.9	-0.105533
	Klrk1	19.9	-0.165015
	Ccar2	78.5	0.0531329
	Stim2	53.4	-0.0888536
	Tmem63a	19.9	0.0288418
	Actg1	756.3	0.0296249
	Ppa1	105	-0.143769
	Gars	284.8	-0.0290056
	Zfyve1	16.2	-0.0812147
	Tgfbrap1	12.1	0.0362201
	Zfp831	5	-0.115257
	Snd1	74.2	0.117886
	Nfe2l2	66.7	-0.102859
	Mrtfa	85.5	0.149362
	Wls	6.6	0.406806
	Hsd11b1	60.1	-0.230267
	Pou6f1	17.4	0.0316967
	Cdca7l	163.7	0.0536907
	Lef1	83.3	-0.0749756
	Wdr82	196.6	-0.10366
	Tns1	5.1	0.0738528
	Gm33104	60.6	-0.0678511
	Sema7a	2.2	0.472774
	Cmtm7	132.6	0.0238011
	Map2k1	50.6	0.00428219
	Npc2	187.8	-0.0935424
	Plcg2	15.4	-0.0828841
	A430093F15Rik	13.6	-0.343393
	Prkca	50.9	0.17025
	Asxl2	25.7	-0.0332551
	Dok2	148.1	-0.0987425
	Cnnm3	21.8	0.100371
	Zyg11b	53.1	-0.210625
	Tsr1	102.6	-0.0969608
	Jmjd1c	32.6	-0.0714499
	Insig1	44.9	0.116132
	Tmem248	73.3	0.0524905
	Spats2	3.2	0.0944203
	Rasgrp4	9.3	0.098889
	Noc2l	235.3	0.125757
	Pxn	51.8	-0.0096815
	Bach1	33.1	0.0191935
	Pnpla7	17.5	0.0722524
	Tut4	80.1	-0.0596115
	Mars1	100.1	0.0738169
	Slc28a2b	20.2	-0.202739
	Wdr43	146.2	0.121361
	Gimap8	150.5	-0.299785
	Fam53b	37.5	0.0205017
	Serpini1	3.9	-0.342132
	Yars	44.5	-0.0653951
	Tars	79.5	-0.0477725
	Slc43a3	33	0.0213974
	Tubb6	14.3	-0.0316515
	Ifitm1	419.9	-0.117785
	Tmem39a	19	0.101043
	Snx9	37.9	0.0885641
	Btbd11	6.8	0.249789
	Cmas	51.3	-0.120552
	Kctd2	48.3	-0.0162659
	Ift80	13.3	-0.170202
	Zfp592	76.7	0.168464
	Il17ra	115.1	0.00056561
	Grap	240	-0.0564953
	Ahcy	64.9	0.0832917
	Hp1bp3	225.3	-0.0424483
	Mfsd2a	2.7	0.268669
	Inpp1	29.8	-0.194349
	Itpripl1	42.9	-0.0430873
	Eno1	476.3	0.00884171
	Btg1	163.1	-0.0871674
	Rnf145	106.1	-0.156234
	Orc1	25.5	0.0149316
	Trac	1645.4	0.048092
	E2f2	113.8	-0.02046
	6430571L13Rik	3.4	0.256687
	Pik3ip1	34.8	0.14382
	Zbtb44	27.6	0.0725934
	Rnf19b	126	0.014583
	F2rl2	24	-0.773878
	Pnrc1	126.8	0.194265
	Tmed5	62.4	-0.0937751
	Hspa9	340.5	0.0144957
	Dusp1	7	-0.0558043
	Creb1	27.1	-0.129209
	Slc16a10	9.6	-0.0838949
	Cdkn2c	127.5	0.165329
	Pnrc2	199.9	-0.0845446
	Ddit4	134.8	0.140086
	Abcg1	27.2	0.141586
	Smc4	642.4	-0.109283
	Lsp1	445.9	-0.0441689
	Psat1	163.4	0.0296189
	Gbp5	27.3	-0.34202
	Arcn1	56.5	-0.0545042
	Smad3	63.7	-0.0656214
	Gcnt4	0.8	0.578748
	Dock11	111.7	-0.0951373
	Wwp1	24.6	-0.0910064
	Ehd3	32.2	-0.421733
	Tomm40	57.5	0.285973
	Stt3b	193.8	0.0153643
	Dyrk3	3.7	-0.0856191
	Bin2	397	0.0504
	Atp8b2	80.1	-0.0077122
	Eif1a	80	-0.104396
	Zfp608	0.5	0.726216
	Mindy3	19.5	-0.198881
	Fas	18.4	-0.239687
	2310043P16Rik	17.3	-0.174696
	Mapk1ip1l	55.6	0.0607102
	Got1	65.2	0.00671857
	Dusp3	3.3	-0.411214
	Mgat4a	21.4	0.125606
	Xrn2	304	-0.121339
	AW112010	1617	-0.557859
	Neurl1b	16.3	0.0489649
	Prex1	205.6	-0.0132817
	Agpat3	69.2	0.0821499
	Tspyl4	22.9	-0.0812401
	Acot7	183.8	0.0707048
	Fam53c	40.3	-0.0489723
	Metap1	26.5	0.00988779
	Prag1	12.4	0.38779
	Fam241a	51.1	-0.123015
	Cish	135.5	-0.103759
	Gng12	5.7	0.101404
	Mxd3	83.8	0.211686
	Plod2	22.8	0.0947902
	Ifit1bl1	33.8	-1.04485
	Mppe1	57.4	-0.0638602
	Calr	649.2	-0.129987
	Mvd	43	0.0844908
	Slc16a1	111.6	0.00444967
	Tgfbr1	24.3	-0.0590188
	Frmd8	196.9	0.136688
	Galnt3	16.3	-0.363213
	Senp7	8.6	-0.0555379
	Tapt1	126.8	-0.0505054
	Mex3b	18.5	0.260132
	Trim12a	38.3	-0.156869
	Cd244a	7.1	-0.445624
	Kif3c	8.3	-0.0330014
	Magohb	27.8	-0.257969
	Aars	58.2	-0.030694
	Myo1e	9.3	-0.389118
	Lrrk1	14.6	-0.440865
	Cep350	31.4	-0.0355873
	Pacs1	85.2	-0.0087097
	Ctla4	108.5	0.277473
	Thop1	17.4	0.350959
	Ank	47.4	-0.0867124
	Cdk8	15.4	-0.0371786
	Mllt3	11.7	-0.169763
	Eif4ebp1	24.5	0.214449
	Fbxo32	20.2	0.327973
	2810001G20Rik	48.9	-0.117492
	Ehd1	55.7	0.327618
	Ttc38	17.6	-0.134043
	Gzma	1096.7	-0.951868
	Elovl5	287.8	-0.134037
	Cox7a2l	437	0.0391332
	Bclaf1	62.3	0.0168657
	Slc2a3	27.6	-0.0960497
	Mtmr14	52.4	-0.059992
	Zcchc2	30.4	0.151751
	Ncf1	49	-0.342877
	Ppid	71.2	0.100385
	Ar	13.5	-0.0416128
	Fam117b	28.5	0.0446722
	Baiap2	17.4	0.0781792
	Xiap	54.2	-0.14958
	Pstpip1	114	-0.0178291
	Hmga1	33.9	0.0127717
	Yrdc	43.3	0.0667067
	Impdh1	118.6	0.142018
	Cops4	50.1	0.0493349
	Kif5b	88.6	-0.0790695
	Il6st	26.2	0.148263
	Cd28	190.6	-0.350537
	Zdhhc5	67	-0.0504716
	Tnfaip3	18.1	0.0744665
	Heg1	22.6	-0.0868225
	Ngly1	63.4	-0.223056
	Atg12	25.5	-0.120393
	Pcmtd2	43.7	-0.05543
	L3mbtl3	11.8	-0.0173419
	Psmd3	115.4	0.162518
	Slc28a2	75	-0.114389
	Gvin-ps6	69.7	-0.326425
	Cyp51	137.1	-0.0536282
	Med7	13.8	-0.0508542
	Selenos	111.2	-0.138874
	Dcaf12	109.9	-0.0226047
	Rad54l2	30.9	-0.0695862
	Nfatc3	123.3	-0.136809
	Stt3a	100.4	-0.0293182
	Irf2	60.2	-0.100834
	Nemp2	33.5	-0.112368
	Lmna	14.1	0.29381
	Sri	145.7	-0.134191
	Cyld	58.4	-0.181738
	Degs1	184.6	-0.156713
	Slamf7	42.3	-0.514443
	Trpv2	83.1	-0.0446765
	Pprc1	66.1	0.230594
	Cd101	12.8	-0.734999
	Mfsd13a	4.4	-0.239821
	Nck1	45.7	-0.307344
	Heca	61.3	0.0863262
	Cxcr6	620.4	-0.565152
	Cep68	49.6	0.020137
	Ctsc	107.9	0.00112306
	Nup54	65.2	0.00146885
	Mdp1	85.9	-0.0807691
	Arl4a	10.5	-0.216132
	Klhl18	16.3	-0.0128575
	Sc5d	58.7	-0.127653
	Ptpn4	41.5	-0.321255
	Jmjd6	28.9	-0.0033602
	Sike1	28.7	-0.103103
	Hvcn1	60.4	0.103328
	Abcc1	15.8	0.0807749
	Marf1	49.2	-0.0777698
	Gm30054	23	-0.154004
	Slc33a1	24.8	-0.0505421
	Gfpt1	22.7	-0.278365
	Itpripl2	17.1	-0.134079
	B4galnt4	25.2	-0.0020345
	Tspan32	9.6	-0.371646
	Arid4b	23.1	-0.15135
	Enah	0.1	1.0138
	Nusap1	239.2	-0.0527533
	Jak1	483.3	-0.228353
	Sema4f	11.2	-0.120339
	Sec24b	63.9	0.0412
	Lama5	3.3	0.0914118
	Timp2	10.7	0.457205
	Krcc1	120.6	-0.253442
	Scd2	378.8	-0.0789494
	Gm33989	5.1	-0.0801044
	St8sia1	46.3	-0.206733
	Drc1	88.1	0.229352
	Pmpca	99.1	0.0342337
	Lrrc59	197.6	0.0633279
	Apol7e	91.8	-0.369232
	Ssrp1	366	-0.0343975
	Lipg	0.4	-0.449634
	Il7r	45.4	-0.0742778
	Med13l	8.7	0.0774337
	Fkbp5	60.1	-0.0893457
	Smpd5	44.5	-0.306416
	Efr3a	80.8	-0.0776989
	Pycard	68.6	-0.162073
	Syt11	12.6	-0.0925928
	Plxnc1	11.2	-0.240279
	Ccdc86	15.3	0.0957501
	Ddx60	3.1	-0.113636
	Slc25a13	11	0.15551
	Tent5a	17.5	-0.198507
	Mafk	33.5	0.0507361
	Eprs	54.4	0.0408055
	Sbk1	28.1	0.422382
	Fam102a	191.3	-0.0329928
	Med12l	2.1	-0.213684
	Lars	78	-0.0918548
	Unc13a	1.3	0.210244
	Ncald	5.3	-0.386153
	Atp6v0a1	2.3	-0.742974
	Cryl1	21	-0.0680033
	Pofut2	12.8	0.102762
	Tha1	11.9	-0.0506498
	Usp39	115.1	-0.0229318
	Zfand5	21.3	-0.0019674
	Fmnl3	59.4	0.198038
	Zfp945	6.9	-0.0979946
	Tgtp2	90.2	-0.39132
	Pck2	3.7	0.189652
	S1pr3	0	-0.204972
	Ier3	20.1	-0.521887
	Tceanc2	21.6	-0.0428705
	Ifit2	39.5	-0.501699
	Mdh2	263.2	0.0822514
	Abcg3	18.4	-0.277029
	Nop2	131.1	0.0955628
	Gm50012	3.2	-0.261445
	Tmem97	95.5	0.107905
	Cdc25b	228.8	-0.0398767
	Vipr1	6.3	-0.393187
	Prkag2	16.9	0.0613161
	Myo10	5.5	-0.376846
	Eif2ak2	40.8	-0.130667
	Dtx4	6.2	0.0332667
	Siah1a	32.1	-0.0445418
	Actn2	7.4	-0.728275
	Ttc33	56.7	-0.0286187
	Nploc4	92.7	0.00555144
	Eif2s2	69.9	-0.0711151
	Hbs1l	34.1	0.00908226
	Eif1	377	0.0278866
	Pycr1	0.6	0.129124
	Aldh7a1	4.6	0.0307586
	Tesk1	21.6	0.242607
	Epsti1	582.1	-0.478569
	Crtam	13.5	-0.268313
	Nxpe3	31.2	-0.0725574
	Rps6ka3	130	-0.195055
	Bach2	16.2	0.0186678
	Nmnat2	2.8	-0.256681
	Ikzf2	4.3	-0.233876
	Srpk2	20.9	-0.123275
	Pik3c2a	17.1	-0.10553
	Zc3hav1l	11.4	0.077401
	Mlkl	38.2	-0.201749
	Rassf3	35.3	0.037141
	Cdc34	154.2	0.206012
	Cdk19	55.7	-0.0498891
	Maf	2.3	0.0121294
	Lockd	17.1	-0.139221
	Elmo2	57.6	-0.146909
	Arel1	66.3	-0.267315
	Setx	103.4	-0.103358
	Fyn	340.5	-0.0945346
	Gpt2	0.4	-0.0572457
	Btbd6	30.5	-0.0725263
	Lap3	70.5	0.0493606
	Fhl3	45.7	-0.0232766
	Gpr15	7.7	-0.473379
	Icam2	40.9	-0.0853005
	Ifrd1	31	0.0456711
	Sec61a1	134.7	-0.0248548
	Zswim6	15.2	-0.108186
	Npm1	1594.3	0.00608097
	Dck	161.1	-0.118386
	Chchd4	11.8	-0.0247371
	Pitrm1	62.9	0.0191471
	Fam214a	15.7	-0.0955802
	Esm1	0.7	-0.572098
	Drosha	28.7	0.0850693
	Rnasel	45.7	-0.151382
	Adam15	2.7	-0.0610376
	Bcl2	318.1	0.0330638
	Mtbp	27.6	-0.0292086
	Lgals3	389.1	0.0762744
	Rfc3	43.9	0.102821
	Polr3g	18.3	0.0754988
	Alad	35.3	-0.0236461
	Unc5cl	11	-0.419184
	Numa1	180	0.0785265
	Camk2d	6.4	0.0418165
	Rai14	1.8	-0.354633
	Desi1	51.6	0.070282
	Srpk1	85.2	-0.0282163
	5830468F06Rik	80.7	-0.165824
	Hnrnpab	808.9	-0.0686606
	Nacc2	2	0.0529273
	Selenon	12.3	-0.250149
	Sesn3	68.2	-0.16152
	Ikzf3	98.2	-0.170546
	Dapl1	137.7	-0.342797
	Pot1a	15.8	-0.143002
	Mak16	153.5	-0.0234389
	Zfp654	44.3	-0.144553
	Septin1	720.6	0.00525021
	Art4	26.7	-0.23879
	Pgm2l1	13.1	0.0585207
	Gns	15.2	0.00019339
	Rcn2	18.7	-0.0409017
	Bicra	19	0.252575
	Fry	3.2	0.0291284
	Gtf2i	57.6	-0.107675
	Map7d1	101.9	0.197624
	Ube2s	39.6	0.0652777
	Poglut1	19.8	-0.025363
	Mcoln2	38.9	-0.326104
	Stag2	154.2	-0.0588043
	Sell	138.1	0.251044
	Rapgef4	3.1	-0.170389
	Spire1	4.2	0.318591
	Narf	23.9	-0.0023906
	Eif4e	47.7	-0.0016445
	Hmgcs1	211.4	-0.0329275
	Nefh	43.4	0.0428244
	Cfp	3.3	0.0464354
	Elovl1	113.3	-0.0762371
	Mtdh	39.5	-0.0646408
	Mturn	9.9	0.081157
	Gm21011	8.9	-0.623408
	Slc9a9	38.1	-0.0910564
	Uhrf1bp1l	24.6	-0.0433631
	Polr3f	16.5	-0.088075
	Vgll4	65.7	0.199147
	Kmt2e	100	0.0631551
	Ccsap	26.5	-0.0355057
	Rassf5	292.6	-0.0287645
	Plcl2	70	-0.0356057
	Sh3kbp1	99.3	-0.0913572
	Pabpc4	97.2	0.33352
	Eif3b	433.2	0.106951
	Zbtb42	15.7	0.0799324
	Hsdl1	63.4	0.12369
	Etf1	298.4	-0.0616092
	Lag3	43.3	0.463199
	Irgq	14.5	0.0846786
	Arid5b	10.8	-0.0847089
	Nipal1	8.1	-0.0451285
	H2-Q10	3.6	-0.0834629
	Zfp646	46.1	0.062631
	Hspbap1	4.3	-0.138941
	Zkscan14	16.7	0.144518
	Birc2	48.2	-0.173757
	Dnajc21	36.7	-0.118865
	Slc35b1	62.8	-0.0898749
	Itga6	25.8	-0.106673
	Gnl2	85.1	0.086886
	Snrk	33	0.0632163
	Fut8	23.2	0.0117891
	Capn5	0.6	0.92186
	Usp3	83.1	-0.0095104
	Fdft1	35.7	-0.0703843
	Pmvk	45.7	-0.0827615
	Dab2ip	0.3	0.592347
	Scp2	60.9	-0.140029
	Eif4a1	586.3	0.0486543
	Kdm7a	14.3	-0.261257
	Phgdh	236.1	0.188998
	C1qbp	179.8	0.0702622
	Smyd5	26.1	0.216499
	Gcsh	88.7	-0.0520818
	Eif2d	23.2	-0.0207782
	B3gnt5	21.2	-0.130505
	Ern1	5.2	0.128617
	Cnn2	967.6	0.0252491
	Bcl11b	83.1	0.196383
	Myo3b	5.9	-0.230922
	Mphosph6	34.2	-0.0898254
	Hspa5	375.4	-0.170195
	Phf13	30.2	0.029169
	Kdelr2	90.5	0.0965142
	Naa25	26.9	0.0267716
	Tdg	25.5	-0.138504
	Surf6	50.9	0.0130588
	Upf1	132.8	0.218486
	Sars	100.8	0.0196204
	Cyb5r1	14.2	-0.0093443
	Scarb1	20.3	0.286746
	Mybbp1a	273	0.133946
	Depdc1b	53.5	-0.0583498
	Lpcat3	46.7	-0.278779
	Baz1a	80.4	-0.0316941
	Jdp2	6.3	0.0563241
	Kcnk5	62.5	0.0124601
	Mob1b	10.5	0.0342418
	Lrp5	3.7	0.252086
	Sorcs2	5.5	0.538698
	Dpagt1	26.9	0.00419485
	Vezt	2.9	0.169683
	Rlim	61.8	-0.0247594
	Tpi1	382.5	-0.107321
	Fam32a	75	-0.184972
	Plekho2	39.6	-0.201236
	Carmil2	98.1	0.211136
	S100a13	431.8	-0.311133
	Zrsr1	10	0.00651204
	Prrc1	14.1	0.147231
	Clec2i	55.5	-0.0480146
	Osm	40	0.00221626
	Flot2	100.9	0.169223
	Eif4g2	464.7	-0.0480445
	Casp8	136.3	-0.0413788
	Dpp4	83	-0.174953
	Mosmo	26.9	-0.129413
	Zmiz1	71	0.0363788
	Zfp949	13.6	-0.0044378
	Atp2a3	349.6	0.0286728
	Dgcr8	44.7	-0.130431
	Psmd12	152.4	-0.0623288
	Syngr2	154.6	0.0482317
	Etv4	0.8	-0.312962
	Dgkh	2.8	-0.0513361
	Cdc42se2	231.2	-0.190547
	Vim	1668.9	0.173882
	Aurka	85.8	-0.119233
	Cdk9	65	0.0114465
	Nedd4	31.1	-0.0099431
	H2-Oa	37.3	0.225005
	Arid4a	68.8	-0.149015
	Tm9sf4	34.3	0.0345094
	Pi4k2b	16.4	-0.108852
	Spag1	0.9	0.0910493
	Spag9	43.3	0.0364021
	9630013D21Rik	12.8	0.0622712
	Ulk2	35.1	-0.165508
	Pgs1	31	0.00092041
	Kdm6b	20.9	0.564697
	Grwd1	64.3	0.167358
	Wdyhv1	51.1	0.108686
	Ahdc1	14.9	0.571624
	Pkd1	14.5	0.132815
	Pim3	24.6	0.303353
	Cd9	34.4	-0.0416008
	Trgc2	102.6	0.223228
	Tcf12	41.7	0.00260543
	Gm36723	1.1	-0.913516
	Psmd11	70.9	0.0379441
	2700099C18Rik	30.3	-0.166438
	Mat2a	222.7	-0.0002421
	Adam8	36.7	-0.909143
	Chmp1b	96.7	-0.0469833
	Ftl1	388.6	0.0695171
	Trmt1l	20	-0.132562
	Slc35b4	26.5	-0.164702
	Vps13d	16.4	-0.0596902
	Tesk2	6.9	-0.0364832
	Chst11	13	-0.179752
	Dhx33	20.7	0.0179145
	Acsl1	4.7	0.211847
	Bnip3l	71.8	-0.0630723
	Sqle	63.3	-0.0596659
	Ip6k1	56.3	0.0548719
	Rnf126	114.8	0.546002
	Atp6v1a	49.9	-0.171162
	Unc119	38.8	0.166714
	Cct7	182.5	0.0361426
	Adrm1	46.4	0.375126
	Rundc3a	7.6	0.142942
	Eif5	179.2	-0.0830381
	Prpf31	67.5	0.00653594
	Prelid3b	174.2	-0.0723181
	Calcoco1	16.6	0.0813661
	Eif2b3	15.1	0.0227808
	Rnf13	17	-0.134551
	Ubn1	93.7	0.0109231
	Gorasp2	100.4	0.00436151
	Prnp	25.2	0.308376
	Plekha1	7.9	-0.13847
	Sec24d	12.2	-0.20559
	Elovl6	27.8	-0.0283188
	St3gal1	21.3	0.112569
	Carm1	53	0.295192
	Klhdc4	53.6	0.0902712
	Sgms1	4	-0.498806
	Rrp9	57.3	0.358078
	Tes	103.2	-0.0191986
	Nr2c2	47.1	0.0503542
	Hsph1	41.2	-0.0948752
	Shroom3	0	-0.6694
	Ndc80	54.6	-0.164561
	Rabgap1	15.5	-0.0997222
	Cd8a	1011.8	-0.136865
	Spp1	14.1	-0.919637
	Rnf141	6.9	-0.108006
	H1f0	44.3	-0.188437
	Cisd1	86.6	0.0920889
	Odc1	342	0.0221491
	Pa2g4	485.3	0.0618722
	Aqp3	36.9	0.389354
	Slc19a1	29.9	0.324281
	Ncoa7	11	-0.0409183
	Eml2	24.7	-0.04472
	Csrnp1	23.5	0.273059
	Atg9b	5.5	0.0980904
	Klhl5	11	0.0188218
	Fads2	16.9	-0.335896
	Pank2	47.7	-0.101661
	Slc4a7	6.4	-0.178075
	Mybl2	40.3	0.243555
	Cyb5b	157.4	0.0171467
	Golga7	50.6	-0.0964625
	Cstf1	50	0.0288265
	Tmem189	58	-0.0237195
	Arhgap1	148.7	-0.142491
	Fam210a	25.8	0.0437272
	St13	50.8	0.0320863
	Unc5b	2.3	0.23339
	Ktn1	15	0.0412238
	Smad7	57.6	0.408172
	Pafah1b2	45.9	-0.0535214
	Dock2	215	-0.0250314
	Dusp16	3.6	0.120415
	Rrm2	464.3	-0.0689916
	4833420G17Rik	51.4	-0.0090708
	Dlat	32.5	0.0448907
	H2-K2	30.6	0.063078
	Tm6sf1	32.7	-0.150619
	Atm	41.6	-0.203004
	Zbtb18	25.5	0.0437073
	Herc4	43.7	-0.216797
	Mknk2	408.8	0.156754
	Dmwd	0.2	1.4623
	Sec23b	52.8	-0.0628998
	Maf1	113	0.124183
	Tnfrsf21	11.2	-0.0110191
	Cdc14a	8.5	0.035457
	Frmd4b	4.5	-0.280486
	Tnfrsf14	74.3	-0.115826
	Gem	13.5	0.237272
	Arhgdib	2731.1	-0.182867
	Irf1	218.3	-0.140365
	Scd1	4.6	-0.416351
	Tcf4	0.4	0.510894
	Ubxn7	28.9	0.0361299
	Hars	166.5	-0.112166
	Chd6	13.3	0.120802
	Tab2	196.4	-0.12158
	Racgap1	211.1	-0.0091101
	Foxo1	93.9	-0.0956746
	Glrx	34.6	-0.510767
	Rnh1	86.5	-0.0223464
	Trdc	18.5	-0.270766
	Mdm2	63.2	-0.04881
	Sec22c	25.2	0.0324154
	Foxn3	20.7	0.0883695
	Stard4	84.2	-0.108243
	Ebna1bp2	121.6	0.0443055
	Lyrm2	31.8	-0.333923
	Ubash3b	24.2	-0.152641
	1500009L16Rik	17.1	0.120785
	Cacna2d4	1.6	-0.114819
	Pik3ap1	18.4	-0.131259
	Lamb3	6.9	0.271494
	Psme2b	62	-0.198446
	Map3k1	46.2	0.0583646
	Rreb1	9.8	0.252961
	Mx1	8.1	-0.983694
	Ifrd2	52.1	0.355485
	Txndc5	69.4	0.0658339
	Trpm4	2.1	0.185018
	Gzmc	21.2	-0.221294
	Surf2	36.8	0.0587652
	AI661453	1.9	0.0895576
	Aldoa	934.3	-0.124434
	Cd3g	492.4	-0.259197
	Pdpr	46.8	-0.112348
	Tmem199	30.2	-0.0055391
	Ceacam16	5.7	-0.0725615
	Stx2	14.9	-0.0278533
	Vps8	14.5	-0.0170838
	Sdf2l1	105.1	-0.0378334
	Aspm	60.7	-0.0695168
	Rasa1	93.6	-0.181143
	Ipo4	13.5	0.278361
	Srsf9	90.1	0.0833346
	Ppp5c	127.7	0.202953
	Kctd20	52.9	-0.117927
	Zfp41	8.8	0.0428717
	Adcy7	167.9	-0.223478
	Tmem109	73.4	0.0516095
	Ntrk3	0.9	-0.15147
	Myo16	0.1	0.567185
	Ifit3	7.5	-0.784813
	Plek	68.5	-0.540945
	Tbc1d15	98.9	-0.0395146
	Rhob	3	-0.237879
	Sigmar1	37.9	-0.0182966
	Pik3c3	58	-0.0228459
	Ahsa2	19.9	-0.14094
	Abca3	9.7	0.230835
	Rxrb	64.8	0.135939
	Klhl30	7.2	-0.540451
	L2hgdh	8.6	0.45476
	Actb	10099.7	0.0255469
	Phlda1	5.6	0.576332
	Slc25a51	60.1	0.0553269
	Gm19705	11.4	-0.262596
	Clcn5	6.2	-0.153148
	Riok2	55.1	0.0400618
	Plcg1	117.8	-0.0476401
	Atl3	94.2	-0.138112
	Ccdc28a	12	0.13239
	Gatd1	28.9	0.0185629
	Itprid2	13.5	0.097208
	Phf10	31.3	0.0379546
	Cd69	21.1	-0.119208
	Ahr	10.7	0.356915
	Vps37c	25.4	0.0212683
	Smc6	76.7	-0.161856
	Epop	32.7	0.298568
	Spcs3	183.3	-0.0944343
	Noc4l	111	0.177107
	Mier2	16.7	0.415228
	Zbtb4	13.2	0.137615
	Metap2	98.2	-0.0409666
	Cdon	15	-0.0650658
	Pin1	38.4	0.100404
	Ccdc82	35.9	-0.0715287
	Crebbp	31.8	0.0474486
	Reep3	26.6	-0.178566
	Gm19585	81.8	-0.551613
	Hip1r	60.1	0.0603603
	Wrn	34.7	-0.132097
	Pdlim1	76.3	0.026144
	Ccdc71l	16.4	-0.0396571
	Ccnd3	90.5	0.0746536
	Emp3	510.8	-0.0101704
	Gm8871	0	-0.204972
	Spata6	28.4	-0.129148
	2610044O15Rik8	21.2	-0.272484
	Fbxl3	67.2	0.0294077
	Loxl2	0	-0.204972
	Hras	33.1	0.152987
	Baiap3	28.6	0.040374
	Gata3	44.1	0.188405
	Bambi-ps1	42	-0.0764124
	Slc6a19	4.8	-0.48841
	Kif13b	8	-0.0541699
	Zfp362	55.4	0.229739
	Rabep1	27.9	0.0464476
	Uevld	8	-0.0584603
	Zfp251	35	0.087077
	Ncl	707.1	0.00443484
	Lat2	13.8	-0.899067
	4933440M02Rik	2.8	-0.560455
	Rrs1	92.7	0.13801
	Hbegf	0.4	-0.420685
	Kansl1	71.6	0.016467
	Furin	30.4	0.180552
	Prdm1	5.9	-0.499424
	Accs	9.9	0.224705
	Tecpr1	45.9	0.0573941
	Alkbh4	48	0.0743859
	Canx	420.3	-0.0921436
	Dis3	56.1	0.0474853
	Gda	0	-0.204972
	Gpcpd1	38.7	-0.452472
	Zmat3	15.5	0.030728
	Frg1	174.9	-0.158381
	R3hdm4	63.5	0.145038
	Nt5dc3	9.9	0.0158382
	Slc25a53	9.7	-0.300471
	Rab5b	45.7	-0.0399826
	Pmaip1	25.7	0.0150575
	Ttc39c	9.6	-0.611279
	Eif4ebp2	186.5	0.0635972
	Hjurp	181.6	0.0284331
	Pdap1	78.1	0.0482975
	Gvin1	7.9	-0.464439
	Tcof1	139.1	0.221223
	A630014C17Rik	2.8	-0.0579638
	Aqp9	45.1	-0.240247
	Ndfip2	19.9	-0.0930354
	Hpgds	4.3	-0.205471
	Ankrd12	14.9	-0.088652
	Vat1	11.6	0.227699
	Lypd6b	6.2	-0.707398
	Cep83	27.5	0.0977042
	Mrps18b	42.6	0.0596689
	Irf5	5.1	0.16114
	Ikzf1	389.4	-0.0827294
	A930005H10Rik	23.7	0.142439
	Wdr37	22.6	0.00663915
	Kdsr	15.3	0.145131
	Angel2	55.1	-0.122179
	Mtss1	6	0.210646
	Emsy	21	-0.0722839
	Lims1	116.1	-0.138184
	H2-Ob	3.9	-0.412185
	Fbxo28	31.3	-0.111839
	Atad2	70	-0.090582
	4930481A15Rik	4.9	0.0740371
	Fgd3	57.4	0.0752628
	Mfsd5	66.7	0.141218
	Sh2d1a	28	-0.16499
	Sgk1	18.8	-0.307294
	Fryl	61.4	-0.206201
	Nudcd1	10.2	-0.0365743
	Tgtp1	67.6	-0.400626
	Met	0	-0.204972
	Park7	215.9	0.00979962
	Lrrc61	23.3	-0.0700097
	Zhx2	10.8	0.224601
	Prxl2c	18.1	0.111214
	Atg13	46.1	0.112858
	Fam172a	39.8	-0.0661858
	Rrn3	62.2	0.00188972
	Gab2	1.7	0.377966
	Dnajb11	138.3	-0.140806
	Vegfa	1.2	0.565053
	Mrto4	73.8	-0.029878
	Rbl1	110.9	-0.093778
	Ncapd3	75.1	-0.0264819
	Dguok	19.7	0.120938
	Smg5	69.7	0.108546
	Smad1	12.2	0.243415
	Gm2a	88.5	-0.098568
	Tcf19	191.7	0.0252119
	Ubald1	26.5	0.385645
	Sp3	154.9	-0.0270397
	Trpm7	65.3	-0.0568185
	Mgat5	16	-0.449636
	Cers2	133	-0.0236322
	Gtpbp4	48.7	-0.0572559
	Sp140	45.5	-0.349684
	Tnpo1	103.3	0.00624228
	Rgs16	11.3	0.229019
	Nr1d2	26.8	0.0767978
	Vsir	190.9	-0.116375
	Gm45606	7.8	0.269732
	Pdia4	156	-0.134064
	Asb1	12.7	-0.0283831
	Cinp	31.6	0.0216802
	Usp38	87	-0.0657738
	Abhd2	66.8	-0.140305
	Ddb2	55.7	-0.0341505
	Klra5	3	-0.158566
	Flnb	21.8	0.0980706
	Rflnb	16.8	-0.0882662
	Vcp	216.2	-0.0175465
	A930024E05Rik	12.2	0.171327
	Pkd2	0.2	-0.476888
	Dimt1	11.5	0.130119
	Tuba8	0.6	0.671885
	Uhrf2	35.3	-0.118674
	Git2	34.7	0.050379
	Errfi1	11.3	-0.487276
	Pdzd2	0.1	0.0692286
	Slc39a6	99.6	-0.083039
	Ints4	27.8	-0.0004584
	Imp4	34.1	0.0611795
	Rpia	44.8	-0.0839272
	Gtf2ird1	1.7	0.40972
	Ctsd	282.2	-0.154577
	Phf20l1	34.4	-0.187721
	Cbwd1	14.7	-0.100559
	Lrp10	121.6	0.100539
	Procr	0	-0.204972
	Rexo5	40	-0.290717
	Babam2	32.5	0.0267454
	Ap1ar	32.5	0.0260712
	Creb5	0	-0.0442307
	Cir1	22.9	-0.173571
	Zfp369	11.4	-0.032286
	Stat4	81.3	-0.218333
	Acadm	35	-0.0906626
	AI467606	184.8	-0.121813
	Usf2	80.3	0.21551
	Tspan31	69.2	-0.37709
	Chpf	22	0.564753
	Slc35d1	6.6	0.0840684
	Chst2	5.2	0.0094184
	Plin2	5.8	-0.229651
	Ppm1g	185.3	-0.0119395
	Rpf2	81.6	-0.0753051
	Cblb	86	-0.235221
	Nrcam	0	0.0640527
	Frat1	10.2	0.245088
	Pdia5	0.8	0.467291
	Smad4	91.3	0.0793535
	Pnpla8	10.1	0.0352952
	Setbp1	26.9	0.354428
	Kbtbd7	13.2	-0.123319
	Tcp1	332.9	-0.0432872
	Pced1b	122.9	0.00456745
	Stoml2	61.4	0.0542896
	Dennd11	45.2	-0.0237403
	Tlr12	4.4	-0.183856
	Ier5	62.7	0.180222
	Pecam1	28.6	-0.239273
	Rap1gap2	8.4	-0.0079795
	Upk1a	1.9	-0.0420931
	Nfkb1	105.5	-0.034098
	Bcl3	13.7	0.130897
	Tcf20	76.9	0.0399509
	Rnf4	93.7	0.0245027
	Nop56	189.2	0.0465137
	Inpp4a	6.3	-0.136206
	Aamdc	8.9	-0.100748
	Ppme1	46.9	-0.0148937
	Cd93	12.1	-0.190526
	Dnajc11	24.3	0.0509531
	Rabgap1l	11.7	0.0504435
	Tnfrsf10b	5.8	0.0266248
	Trpc4ap	77.2	0.0046823
	Cdh17	0.2	-0.207598
	Trim14	24.1	0.14489
	Ltbp3	0.1	0.348938
	Hsp90b1	547.1	-0.189616
	Ston2	1	-0.507444
	Ppif	28.8	0.0737665
	Rpn1	203.5	-0.0390522
	Casp2	70.3	0.0939928
	Zfp87	33	-0.152133
	Fasn	160.1	0.223184
	A930002I21Rik	5	0.0833646
	Ripk2	19.2	-0.0069089
	Bnip5	1.4	-0.182697
	Cnp	183.6	-0.184702
	Elovl7	4.8	0.0724804
	Frmd6	4.9	0.131352
	Cemip	0	-0.204972
	Sccpdh	0.7	-0.0245613
	Washc4	52.3	-0.145881
	Vrk3	33.4	-0.160598
	Rad51ap1	58	-0.0272909
	Scarb2	84.3	-0.143141
	Esrra	17.1	0.238553
	Micall1	21.2	0.142097
	Aak1	44.1	-0.178119
	Sestd1	1.2	0.294994
	Stat5b	85.9	0.13463
	Mydgf	76.9	0.103862
	Ncoa2	31.4	0.00864248
	Rgs18	6.9	-0.272008
	Slc24a3	0.6	-0.62644
	Tle4	55	-0.261255
	Gramd4	111	0.0538878
	Cltc	187.7	-0.07755
	Ttc39b	127.5	-0.131732
	Rcbtb1	48.5	0.158153
	Uchl3	45.7	-0.0260704
	Cyp4v3	7.7	0.0811137
	Pde6d	11.9	0.133413
	Phf19	35.2	-0.107586
	Eif3c	487.4	0.058167
	Tasl	17.2	-0.388687
	Set	347.9	0.0263472
	Banp	12.2	0.0751841
	Polr3a	29.2	-0.0173609
	Nfatc1	118.5	-0.0238053
	Trim65	17.9	0.109366
	Dus1l	51.1	0.0586998
	Wdr77	30.9	-0.0911045
	Dusp14	1.7	-1.15314
	Kdm8	20	0.174082
	Slc25a1	43.7	0.121483
	Rsl1d1	334	0.0062735
	Pgghg	18.3	-0.0310703
	Cd3d	786.4	-0.236347
	Il6ra	7.9	0.399783
	Kmo	0.7	-0.150799
	Zfp871	59.5	-0.0026096
	Hrc	0	-0.204972
	Pcyt2	55.9	0.121452
	Alg9	16	-0.0819921
	Mbd4	18.7	0.0117604
	Phip	16.7	-0.0310288
	Mcf2l	0	0.0870793
	Zdhhc18	153.5	0.172691
	Urb2	34.4	-0.0617715
	Fgd6	2.1	-0.013587
	Ddc	4.3	-0.693322
	Ssr1	76.6	-0.0996578
	Ogt	179.9	0.0843204
	Vcpip1	40.5	-0.0448977
	Qsox1	19.7	-0.0848393
	Paqr7	24.2	0.16517
	Lpgat1	33.5	-0.182121
	Tox	8.4	0.396114
	Selplg	616.2	0.00463778
	Kri1	86.9	0.02914
	Ocrl	3.4	0.156937
	Zfp354c	3.5	-0.0248847
	Heatr9	5.3	0.0863595
	Lman2	87.2	0.0619089
	Perp	3.5	-0.0009105
	Pik3cg	68.8	0.0958397
	Aprt	157.8	0.0137258
	Pdcd11	44.4	0.0839915
	Mid1ip1	65.7	0.0565806
	Nipa1	3	-0.196119
	Slc31a1	34	-0.0705091
	BE692007	23.9	-0.147775
	Eif5a	1769	0.112706
	Mpzl2	0	2.17792
	Pdxk	14	0.151867
	H2-T10	40.2	-0.093929
	Tbc1d10c	61	-0.0437243
	Nfatc2	63.1	0.192611
	Slc30a1	9.6	-0.147953
	Ddost	319.2	0.0204409
	Endov	15.2	0.183606
	Gspt1	165.4	0.0108066
	Speer1	0	-0.204972
	2610008E11Rik	9.5	-0.143451
	Usp46	5.9	0.024965
	P2ry12	1.6	-0.237255
	Herc1	25.5	-0.0553103
	Mogs	96.4	0.121246
	Ippk	13.9	-0.0243584
	Mob2	30.4	0.0337744
	Abl1	35.2	0.184591
	Naa15	54.4	-0.0005622
	Slc26a2	7.7	0.00743043
	Ccdc58	45.9	-0.0645731
	Sub1	267.7	-0.160916
	Tmem260	5.4	-0.10174
	Sema3d	0	-0.204972
	Hopx	146.1	-0.209892
	Stk32c	8.4	-0.217653
	Hectd3	55.5	-0.0568413
	F730043M19Rik	4.7	0.150154
	Yif1b	77.2	0.281377
	Nmd3	24.9	-0.0133139
	Litaf	29.7	-0.221381
	Strn3	22.3	-0.0748854
	Bcl6	2.7	0.0349426
	Ptprj	39.1	-0.239958
	Smim3	8	-0.273208
	Mcrip1	133.5	0.178468
	Zfp169	8.4	-0.0864314
	Fth1	400.7	-0.0600618
	Art2b	8.6	-0.350665
	Slc49a4	7.2	0.25269
	Got2	111	0.0271883
	Gm13522	0	-0.204972
	Ruvbl2	108.9	0.26339
	Pglyrp1	26.6	-0.2153
	Rbpj	36.2	-0.101119
	Atf3	1.1	-0.145533
	Jak3	72.4	0.314959
	Cycs	54.3	-0.199088
	Zbtb1	28.4	-0.0366606
	Elmo1	61.7	0.0517998
	Man1a	34.2	-0.220823
	Ankmy2	18	0.106507
	Trbv13-2	281.6	-0.167527
	Tmem273	0.9	-0.270996
	Ddx3x	387.7	-0.0306605
	Map6	6.9	-0.251047
	Rad23b	144.8	0.0432427
	Tspan14	166	-0.164559
	Zfp952	15.5	-0.162428
	E230032D23Rik	5.8	0.05037
	Samd4b	28	0.198535
	Lims2	0.2	-0.937039
	Srf	49.7	0.288614
	2610002M06Rik	19.8	-0.0469393
	Srsf6	227.2	0.0513224
	Slc27a1	1.5	0.0611245
	Panx1	33.5	0.0260923
	Nup153	226.1	0.0126492
	Uck2	159.5	0.138275
	Gm37065	2.1	-0.232264
	Mia2	43.3	-0.0115524
	Nudt5	35.4	-0.008019
	Pde11a	6.6	0.0101253
	Slc22a15	1.4	-0.0703632
	Il24	0	-0.204972
	Farsb	124.9	0.00234904
	Ggact	14.4	-0.0175994
	Gm5511	13.7	0.00863791
	Septin11	148.3	0.0159971
	Mvp	12.5	-0.143391
	Bcat2	27.6	0.0519373
	Ano1	0	-0.204972
	Anp32a	399.1	-0.0701067
	Fam91a1	51	0.00535997
	Cd80	7.3	-0.0570885
	Rnf144a	7.7	0.451265
	Slc1a4	2.4	-0.0300445
	Cdk12	32.4	-0.0789728
	Zbtb7b	5.5	-0.620523
	Ptprc	575.8	-0.102386
	C9orf72	3.2	-0.0937386
	Lats1	29	-0.0221261
	Acaa2	125.2	0.0924779
	Itgae	7.7	-0.49685
	Trip10	6	0.0813497
	Tmx1	87.4	-0.0188581
	Cln3	22.1	0.00793243
	Tuba1c	211.9	-0.0566971
	Tma16	8.7	0.0671314
	Wbp1l	83.3	0.109294
	Morn4	0.7	0.559822
	Hsd17b12	143.6	-0.0645125
	Atf6b	53.4	0.164852
	Cpd	30.5	-0.0404954
	Ahrr	0.7	-0.457996
	Ptpn3	2.3	-0.81262
	Lpcat1	18.3	0.0185954
	Csrp1	320.8	-0.0253387
	Polr1b	46.1	0.151964
	Zfp658	8	-0.0002549
	Arl2bp	211.9	0.0119298
	Gfm1	66	-0.0205025
	Phf3	46.9	0.0502047
	Ppp1r14b	133.4	0.125855
	Cnr2	7.7	-0.408395
	Por	56	0.139818
	Bysl	54.2	0.141601
	Ppm1m	39.4	-0.0557163
	Fnip2	5.3	-0.0051053
	Tob1	29.6	-0.0325426
	Bsg	342.6	-0.0733652
	Otud6b	46	-0.0173125
	Mbd3	155.6	0.223739
	Hspa4	228.6	-0.0275358
	Tmpo	179.2	-0.0220624
	Lgalsl	17.8	0.0483308
	Ablim1	301.8	-0.115802
	Gpr18	144.4	-0.0372438
	Mon1b	30.4	-0.0022042
	Rangrf	4.2	0.185782
	Ikbkg	29.8	-0.139021
	Tbc1d17	10.1	0.207712
	Parp1	117.7	0.11983
	Xpc	19.9	-0.0167353
	Ddx21	396.5	0.0559038
	Coq8a	6.5	0.218739
	Septin6	143.6	-0.0587157
	Crbn	42.4	-0.0288674
	Dmpk	0	-0.204972
	Rps27	2059.1	0.088849
	Serp1	97.9	-0.117317
	Tnks1bp1	6.6	-0.0134117
	N4bp1	31.3	-0.0048435
	Col23a1	2.2	-0.113824
	Gnl3	66.7	0.0767565
	Senp3	85.3	0.0133668
	Jakmip1	3.4	-0.0910348
	Zfp367	47.2	0.129078
	Parp8	9.2	-0.175378
	Git1	68.4	0.325587
	Arhgap4	76.8	-0.0558911
	Gm46430	10.8	-0.0124675
	Wnt10b	3.6	-0.229908
	Capza2	151.2	-0.177741
	4833438C02Rik	22.2	0.090345
	Tmem245	9.4	0.00632449
	Pou2f2	7.6	-0.156751
	Pym1	199.3	0.00210975
	Rc3h1	34.4	-0.0032142
	Smurf2	60.8	0.21757
	Slc12a6	14.9	-0.0565706
	Arhgap9	276.8	-0.0272174
	Txlna	90.4	0.103471
	Ddx6	305.5	-0.09781
	Afp	3.7	-0.311057
	Apobr	32.7	-0.347898
	Lrrc75b	4.8	-0.189289
	Ms4a6c	5.3	-0.078793
	Krba1	1.4	0.0886968
	Id2	356.2	-0.660667
	Thra	9.4	0.472358
	Znfx1	28.7	-0.149432
	Zfp626	20.5	-0.0729164
	Kctd11	3.1	-0.166657
	Psmd1	98.6	-0.0622627
	1810037I17Rik	177.6	-0.0102553
	Blcap	20	0.230616
	5031439G07Rik	7.3	0.0861632
	Zbtb14	20	-0.128587
	Rae1	105.6	0.130107
	Aen	47.7	0.10906
	Rnf103	11.9	0.09647
	Dock10	131.5	-0.139422
	Ap1s2	24.8	-0.171374
	Unc119b	78.9	-0.0138399
	Fyco1	17.5	-0.0177619
	Wdr48	35.6	0.0695375
	Plpp2	5.2	0.15797
	Gm6093	1.2	-0.108234
	Tbc1d22b	76	-0.112644
	Plagl2	40.9	-0.0414604
	Grk6	347.6	0.0676607
	Asb2	9.7	-0.414291
	Tmsb10	3706.7	-0.144163
	Psmc1	289	-0.140426
	Egr3	18.1	0.35218
	Zfp358	13.9	0.3258
	Srp19	49.1	-0.0599473
	Rbmx2	37.7	-0.101942
	Map4	63.9	-0.0083337
	Rmdn3	28.8	0.038626
	Arl6ip1	817.9	-0.152271
	Dapk2	21.1	-0.144091
	Bspry	30.9	0.0390689
	Sf1	214.9	0.226613
	Abce1	190.8	-0.0385799
	Ctnna1	58.6	-0.172679
	Nol12	29.2	0.0280447
	Ssr3	221.1	-0.107534
	Frmd4a	1	0.0481345
	Bend3	11.5	0.379234
	Pitpnb	131	-0.0108088
	Trgv2	54.1	0.232131
	Kbtbd2	66.5	-0.105591
	Dusp2	253.5	0.230675
	Copg1	52.6	0.0544084
	Pon2	26.5	-0.114779
	Tk2	24.6	-0.0571117
	Klra1	7.9	-0.649605
	Herc2	29	-0.0152656
	Pias1	38.6	0.0199075
	Igf2r	92.1	-0.141991
	Cc2d1b	95.2	0.0315578
	Sfxn1	58	-0.036975
	Klhl3	1.3	-0.113367
	Tnfrsf11b	0.2	1.27657
	Slc17a8	0	0.938458
	Atxn7	23.9	-0.0159547
	Cysltr1	0.6	-1.10975
	Irf9	49.9	-0.170529
	Rps6ka5	7.4	-0.105949
	Ranbp10	42.9	-0.244998
	Kctd14	0.1	0.535623
	Ulk1	25.4	0.206481
	Homer1	2.3	-0.0550644
	Il1rl1	1.1	-0.303724
	Cyp1b1	0	-0.438345
	Nr4a3	7.6	0.412025
	Marchf3	2.7	-0.568138
	Ankrd13b	11.7	0.617023
	Jund	213.7	0.709452
	Piwil4	0.1	-0.809773
	Ercc1	21.3	0.149915
	Ino80e	34.3	0.112347
	Siae	6.1	-0.127224
	Prep	31.8	0.0294244
	Angel1	8.7	0.039026
	Mastl	31.9	-0.112423
	Hmg20a	14.9	0.0342826
	Eif4g1	359.8	0.0350923
	Trim30d	10.9	-0.144345
	Zer1	19.4	0.112566
	Ak6	16	-0.0911308
	Rars	167.2	-0.0836634
	Ube2j2	39.3	0.188456
	Tnk2	48.2	0.391029
	Ifi27	226.2	-0.236284
	Stip1	352.3	0.0467315
	Dus2	12.3	-0.205381
	Plch1	0.3	0.294616
	Slc39a3	22	0.14149
	Wdr55	56.9	0.0643495
	Gm20559	54.8	-0.149829
	Slc38a1	72.7	0.0461023
	Scai	9.4	-0.0276466
	Tspan4	23.6	0.356221
	Jcad	1	0.222766
	Rdh11	45.2	-0.0772075
	Afg3l1	55.4	-0.008553
	Gm12764	23.9	0.203223
	Pkm	782	-0.147511
	Rbbp6	50.2	0.151276
	Pcmtd1	23.1	-0.247974
	Sptbn1	77.5	-0.0608551
	Pik3r6	0.4	0.103982
	Pts	22.3	-0.0881663
	Atp6v1d	72.4	-0.261883
	Trbv17	138.5	-0.216797
	H2-Q4	431.2	0.0471155
	4930453N24Rik	51.4	-0.185138
	Elac2	66.7	0.116651
	2010315B03Rik	18.4	-0.269008
	Mier3	12	0.0514835
	Pdp2	16.7	-0.0601092
	Otud1	6.8	0.433717
	Sdr39u1	59.6	0.00864606
	Nol11	56.9	-0.0581646
	Smc5	68.5	-0.0088982
	Nrm	170.4	0.034104
	Cass4	0.4	-0.564723
	Pdia3	707.4	-0.22872
	Gbp2	303.1	-0.588005
	Setd2	73	0.0609686
	Bcl9	2.8	0.341488
	Espn	0.4	0.587366
	Pex11a	0.5	0.453254
	Sptssa	150.5	-0.150872
	Dennd6a	23.1	-0.152971
	Ahnak	164.1	-0.222482
	Cactin	71.8	0.262657
	Ldlrad4	16.2	0.181649
	Gatad2b	51.6	0.0910647
	Rps19bp1	39.7	0.237496
	Hs3st3b1	14.5	-0.0882932
	Plod3	6	0.403305
	Map1lc3b	35.7	0.0704489
	Clk1	70	0.0634539
	Ypel1	2.9	0.0297616
	Irf2bp1	34.5	0.391522
	Atxn3	32.4	-0.0687878
	Kmt2b	61.1	0.220537
	Ilk	272.5	-0.0140392
	Macroh2a1	328.9	-0.0279411
	Ankhd1	42.8	-0.0361301
	B3galt4	30.4	0.00065603
	Zfp36	49.2	0.252631
	Hmox1	2.3	-0.685024
	Tmtc4	3.5	-0.210147
	Slc2a9	10.4	0.23877
	Zfp113	11.1	-0.16498
	Cep250	53.4	-0.0062636
	Syt12	0	0.263656
	Tmcc1	4.5	-0.0340255
	Pygl	5	-0.148455
	Chek2	16.6	-0.226641
	Nup88	50.4	0.0421329
	Atp6v0c	23	0.325627
	Hax1	43.1	-0.192662
	Tle3	45.3	0.378639
	Tfdp2	9.5	0.316775
	Ywhae	792.2	0.00950508
	Piwil2	1.6	-0.582458
	Nol10	82.2	0.0243929
	Hus1	17.8	0.0910647
	Neil3	45.4	-0.0400357
	Grap2	381.1	-0.0611457
	Bak1	204	-0.0612095
	Ehd4	42	0.0433005
	Ppp1r12a	111.6	-0.156066
	Stxbp1	0.8	0.216504
	Htra2	21.2	0.155141
	Skp1	269.1	-0.160237
	Actr1b	73.1	0.174355
	Utp15	47.4	0.00327153
	Shld1	11.7	-0.0775325
	Zc3hav1	319.1	-0.133192
	Rnf123	61.6	0.12773
	Klra7	26.4	-0.742654
	Rtf1	94.6	-0.089731
	Kcnk6	9.1	-0.467347
	Kcna2	0.2	-1.26249
	Mtap	111.4	0.0310075
	Khdc1c	0	-0.438345
	Ppard	8.2	0.354044
	Tnip1	94.3	-0.0537925
	Shprh	19.1	-0.0449338
	Syngap1	0.4	0.982621
	Erfe	2.1	0.342417
	Cmip	41.8	0.171585
	Trim5	15.6	-0.390028
	Bach2it1	24.3	-0.199405
	Ccdc102a	13.4	0.0567326
	Oplah	5.7	-0.353216
	Extl1	0.1	1.51439
	Trim12c	43.9	-0.243782
	Arrdc1	93.2	0.137077
	Ipo5	253.6	0.0403525
	Cep83os	8.4	-0.151708
	Col27a1	0	0.936223
	Rdm1	41.7	0.133199
	Edaradd	3.2	-0.264489
	Gm19605	9.7	-0.404064
	Ptpn14	0.1	0.392036
	Fcgrt	7.2	-0.79896
	Slc26a11	16.3	0.151845
	Ctps2	43.9	0.0185802
	Zfp317	26.5	-0.103245
	Gapdh	871.1	-0.104823
	Mindy2	35.8	-0.0864829
	Frat2	23	0.508794
	Fkbp4	199.4	0.182208
	Chd4	201.9	0.0560329
	Chac1	0.6	-1.04846
	Rtkn2	2.5	0.230409
	Lxn	19.8	-0.144558
	Fat1	0	-1.12635
	Meis3	10.7	0.203098
	Slc4a10	0.2	-0.293179
	Zdhhc20	96.8	-0.134951
	Smarca2	20.4	0.0330487
	Cnppd1	68.7	0.0774085
	Rps27l	332.7	-0.0993097
	Usp14	54.8	-0.0182338
	Stx5a	35.5	-0.0215604
	Map9	1.7	0.311893
	Fmo5	2.1	-0.282888
	Cercam	17.5	0.0527105
	Adgrg3	4	-0.0462357
	Nus1	73.3	-0.0807681
	Acadl	230.1	-0.0372511
	Milr1	9.7	-0.367809
	Brix1	103.4	-0.0874546
	Cenpf	62.4	-0.0939453
	Gm49492	2	-0.0202666
	Ruvbl1	84.5	0.0425503
	Myo5a	27.6	0.00268579
	Spcs2	139.9	-0.113773
	Mkrn1	72.8	-0.1021
	Hmgn2	404.5	0.0679843
	Tada2b	27.5	-0.0843575
	Cdkn2b	6.4	-0.396315
	Faap24	30.7	-0.090605
	Prelid2	113.1	0.0860939
	Spin1	66.8	-0.0409299
	Psmd2	251.1	-0.0558351
	Mrps10	10.1	0.203085
	Sf3b4	97.9	0.257831
	Gm37261	22.5	0.0730973
	Hpse	3.5	-0.64566
	Shisa5	1079.2	-0.129499
	Kpnb1	454.6	0.0295172
	Fam136a	37.1	-0.0695827
	Fam207a	62	0.192236
	Gm11707	81.3	-0.292449
	Sult2b1	1.3	0.188749
	Uap1	45	-0.0931084
	Pdxdc1	25.6	-0.112111
	Brca1	46.8	-0.030292
	Dnajc2	106.3	-0.045821
	N4bp2	20.6	-0.0507501
	Dync2i1	0.8	-0.576936
	Ehmt1	31.5	0.0809662
	Ublcp1	29.8	-0.397281
	Brd3	34.8	0.111338
	Bcl2l2	4.3	0.0754657
	Glrp1	0.7	-0.222394
	Ss18	82.2	0.025669
	Tbca	387.5	-0.0960377
	Rpl21	762.5	-0.0083995
	Mmd	27.8	-0.140161
	Endou	1	0.0337164
	Cldn12	1.8	0.0583124
	Jun	49.7	0.272148
	Fbxo9	29.3	0.0868231
	Gcdh	16.8	-0.0816145
	Utrn	31	0.105173
	Kctd5	36.8	-0.0427753
	Tmem40	1.3	-0.5332
	Nudc	285.4	0.241481
	Itm2c	65.7	0.0442906
	Gstm5	0	-0.438345
	Ybx1	936.8	0.0568791
	Fbxo17	3.7	0.300868
	Zfp595	10	-0.29485
	Arntl	6.1	-0.112352
	Trbc1	1396.5	-0.120505
	Snx33	6	-0.168447
	Tspyl3	40.9	-0.0245091
	Sae1	229.7	-0.0111655
	H3f3a	100	0.249487
	Traf3ip3	105.4	-0.012844
	Stat1	70.1	-0.439499
[truncated: 12,329 more rows]

## Sheet: 2F
	mRNA expression (TPM)
		WT			Pim dKO			IL2 WT
	S1pr1	404.1	387.5	353.7	460.7	354.7	425.6	10	5.4	10.3
	Ccr7	222.2	232.9	220.2	407.1	260.9	299.5	25.9	21.2	30.2
	Sell	114.3	132.7	111	207.1	127.3	136	6.5	4.5	8.5

## Sheet: 2G
	mRNA expression (TPM)
		WT			Pim dKO			IL2 WT
	Tcf7	759.1	762.8	605.9	1002.8	684.2	728.8	3	2.6	4.6
	Klf2	141.7	120.7	149.6	294.2	169.2	214.4	9.2	8	8.6
	Foxo1	105.8	95.4	86	96.2	90.8	89.5	46.1	39.3	45.1
	Foxo3	35.9	34.4	31.7	46	34.5	34.5	12.9	12.2	12.9
	Id3	24.8	24.8	26.5	55.8	27.8	39.2	7.2	7.3	9.1

## Sheet: 2H
		IL15 dKO copies ave	IL15 WT copies ave	IL15 WT copies ave - DE proteins (FC>1.5, q<0.05, IDed by >1 peptide)		note: to allow visualisation of proteins with copy number "0" in one condition on a log scale these values have been imputed as 0.1 for plotting purposes only
	Srcap	984	1138.33
	Tns1;Tns1;Tns1;Tns1;Tns1;Tns1;Tns3;Tns3;Tns2;Tns2;Tns2;Tns2;Tns1	40.3333	44.3333
	Tent5a	102.333	157.333
	Larp1b	608.333	625.333
	Pfkfb3	2719.33	3312.67
	Gbp6	22124.3	32011
	Tsc22d2	49.3333	47.3333
	Crybg1	2930.67	3683.33
	N4bp2	314.667	359.333
	Plekha5	376	368.333
	Fahd2a	2030.67	2045.33
	Lcmt1	8162.67	10391.3
	Bptf	117	124.667
	Slc9a6	131.667	138.667
	Ttc13	215	264.667
	Dcaf4	62	53.6667
	Kidins220	836.333	932.333
	Kif13b	2593	3571.67
	Trappc8	3913.67	4196.33
	Taf4	2357.67	2427.33
	Dgkh	6	424.333
	Nt5dc2	830.333	745.333
	Kctd17	288	260.333
	Osbpl7	992.667	1113
	Ptar1	4631.33	5749
	Rapgef1	1520.33	1563
	Chd3	64	61.3333
	Tbc1d25	580	1050.33
	Cul4b	12822.7	14621.3
	Zmynd8	3117	3422.67
	Dhx8	6655	7708.67
	Pgap3	549.333	686.333
	Arfgef2	2070	2505.67
	Bptf	1580.67	1734.67
	Gpatch8	1098	1136.33
	Fam104a	703.333	701
	Cdc27	2903.33	3307.33
	Cdc27	57.6667	81.3333
	Zmym4	225.333	330
	Prdm2	215.333	242.333
	Rlf	41.6667	49.3333
	Zmym1	83.6667	106.333
	Tmem201	570.667	682.333
	Osbpl9	103.667	128.333
	Osbpl9	3202.67	4047.67
	Szt2	3.33333	4.66667
	Mettl23	1229.33	1579.33
	Arhgap27	4325.33	4497.67
	Med14	1946.67	2356.33
	Faap100	274.667	306.333
	Dhx35	1975	2374.33
	Pusl1	2764.33	2945.67
	Ddi2	18740.3	20428
	Slc25a53	3167	3206.67
	Dock11	16550	16786
	Mtg2	5001	4613
	Maged2	118.667	187.333
	Bclaf3	84.3333	80
	Med12	1232.33	1599
	Ryr3	17.3333	21
	Ckap5	28224.7	31258.7
	Ambra1	483.333	450.667
	Brwd3	1.33333	0.333333
	Ndor1	98.3333	81.6667
	Tprn	713	725
	Ndufaf6	629.333	598
	Virma	4450	5133.33
	Man1b1	513.333	511
	Fubp3	9315.67	15031.7
	Map7d1	5453.33	6464.33
	Chd7	1885.33	1652
	Dpy19l4	1139.33	1397
	Pnisr	770.667	1789
	Dcaf10	9.33333	9.33333
	Focad	2387	1945
	Setx	895	1189.33
	Cntrl	2034.67	2268
	Ptpn3	407.333	267
	Shoc1	68	105.333
	Mllt3	394.667	416.333
	Ubr4	6236.33	7707
	Atp8b4	13868.3	16163
	Mdn1	3989.33	4111.33
	Tpx2	15385.3	16018.3
	Ndufaf5	1146	1327.33
	Tubb1	9312.33	11829
	Rtf1	12243.7	13494
	Ppig	8674.33	10098.7
	Itpripl1	110	162
	Ttn	79.6667	77.3333
	Upf2	3985.33	4167.33
	Klhl41	16052.7	12567.7
	Cep152	463	501.333
	Rabgap1	2788.33	3275.33
	Mga	129.333	160
	Atxn7l3	583	634
	Mocs3	73545.3	70230.3
	Las1l	15357	16748.3
	Arid1a	32.3333	38
	Arid1a	47415.7	61496
	Arid4b	251.333	290
	Uhrf1bp1l	206.333	276.333
	Tyw5	1623	1801.33
	Arfip1	17335.3	19650
	Kansl3	1647.33	1798.33
	Trmt1l	7812.33	9112.67
	Dennd3	64.6667	29.6667
	Rsrc2	1791.67	1781.67
	Tbc1d8b	326.667	417.667
	Plcb2	148.667	164
	Ralgapa2	109.333	111.333
	Odf2	570.667	605.667
	Cercam	18	30.6667
	Ttc38	9231	9732.67
	Mtr	479.333	577.333
	Mipep	2757.67	3796.67
	Phrf1	4073.33	2899.33
	Armt1	5408.67	5955
	Rabgap1l	1067.33	1050.33
	Rabgap1l	1223.33	1383
	Dennd4c	3906.33	4833.33
	Wdr76	8963	9383.33
	Dpy19l1	6195.33	7265.67
	Thada	2805	3060
	Sec14l1	30	29.6667
	Usp36	1213.33	1386.33
	Mllt6	1523.67	1102.67
	Cisd3	2541.33	2463
	Chd3	12917.7	14642
	Slfn9	2156	2807.33
	Slc16a6	149.667	230.333
	Eif2b3	26103.3	30305.3
	Mms22l	300	360
	Kif16b	23.6667	42.6667
	Uprt	3507	4179
	Zcchc7	82.3333	82.6667
	Akirin2	288.667	452.333
	Nfx1	460	440.667
	Usp24	4539.33	4966
	Tmem245	526	644.667
	Thoc2	9867.67	11175.3
	Dlgap4	1462	1526.33
	Zbed5;Chchd2	9565.67	9633
	Cad	95362	105516
	Arhgap42	1171.67	1082.67
	Phf3	1369	1367.67
	Ythdc2	1476.33	1644.67
	Brpf1	291.333	339.333
	Otud4	5494.33	6056.67
	Cpb1;Cpa1	784	1227.67
	Rrn3	340.333	421.667
	Zfc3h1	324.333	357.667
	Rapgef6	11684.3	8285
	Unc13d	16997	20912
	Otud7b	700.333	793.667
	Ep300	618.333	751.667
	Tagap	447.333	370
	Tut4	2786.33	3037
	Trappc11	3652.33	4481
	Itpkb	1534.67	1184.67
	Polr3a	2969	3260.33
	Ppfia1	2725	3225.33
	Ankrd44	40519.7	50991
	Scaper	39	42.6667
	Dock5	691.667	913.667
	Rbm25	25421.7	27064
	Xpnpep3	2275	2605.67
	Tatdn2	134.667	146
	Qtrt2	6943.33	8359
	Nup205	25077.7	30593.7
	Pdzd8	1319	1567
	Osbpl8	6713.67	6895.67
	Dnaaf5	4201	4787
	Tmf1	334	397.333
	Arxes1;Arxes2	707	674
	Mfap1a;Mfap1b	15059.3	16610
	Rnaset2a;Rnaset2b	14862.7	22143.7
	Nlrc5	2929.33	4211.67
	Mndal	39217.7	42963.3
	Nkapd1	1097.67	1074
	Tada2b	1345	1087
	Rexo5	76.6667	131.333
	Hnrnph3	10525	14618.7
	Samd1	1622.33	1725
	Safb	16052.7	16212.3
	Lrr1	1025	1445.67
	Ccdc6	6824.33	7003
	Tmed7	24048.3	28193.3
	Rsbn1l	1987.67	2186.67
	Ddx23	27806.7	28854.3
	Tmppe	1374	1519
	Ino80e	1454.67	1242.67
	Pigg	122.333	126
	Ptrhd1	5595.33	6072.67
	Bin2	116979	119300
	Gls	39857	41992.7
	Gls	7765.33	7870
	Mroh1	393.667	528.667
	Piezo1	24.3333	30
	Dgkd	15.6667	16.6667
	Ankhd1	4010.67	5414
	Talpid3	16.3333	16
	Trim5	4037.67	5047
	Gcn1	21446	24793.7
	Ttc17	12.3333	22.3333
	Mki67	89148	88113.3
	Golgb1	508.333	680.667
	Ncapg	48182	57702
	Card6	28.3333	49
	Zc3h7a	1438.33	1890
	Rsf1	4070.33	4239
	Rpl3l	5946.67	5789
	Adap1	5992.33	6676.33
	Erich1	1114	1184.33
	Ahnak2	21.3333	25.6667
	Fam98c	3499	3441
	Rasa1	8375.33	9572
	Setd1a	1670.33	1835.67
	Parp4	919.667	1357.33
	Prr12	899.333	1057
	Fbxl18	295.333	357.333
	Ascc3	2075	2564.67
	Chd2	1115.67	1284.33
	Scaf11	2353	2497
	Herc1	128.667	153
	Ermard	23	24
	Fcgbp	11137.7	3794
	Tex264	3411	4641.33
	Atad2b	4791	5280.67
	Irf2bp2	46040	169632
	Abcc4	199	226.333
	Hectd4	16.6667	19
	Mideas	2193.33	2411.33
	Tarbp1	1324.67	1417.33
	Akap13	6173.33	6608.67
	Nup153	16247.7	15948.3
	Pi4ka	9676.67	10861.7
	Cracdl	447	420
	Cenpf	288.333	323
	Zbtb21	41.3333	44.6667
	Nbas	1367	1669
	Apob	202.333	244
	Ankrd11	177.667	202
	Arid1b	823.333	867.333
	Cep192	693	775.667
	Trip11	1731.67	1896
	Rnf213	3053.67	4023
	Dsp	1822.67	949.333
	Slc4a1ap	30180.3	32859.3
	Nolc1	47436	48566.7
	Setd2	286.667	302.333
	Kif23	4726.67	5302.67
	Ythdc1	3040.67	3115.67
	Cfap44	560.667	613
	Nlrp12	661	1114.67
	Ahnak	89995	108466
	Myo1e	8294	11092
	Ccdc85c	273	256.333
	Srsf11	14775	16882
	Bod1l	1753	2085.33
	Utrn	3778.33	3852.33
	Pfdn4	28919.3	33361.3
	Ube4a	2603.33	3074.33
	Akap11	146	185
	Zc3h13	1083.33	1160.67
	Arid2	2192	3153.67
	Rnf169	738.667	758
	Numa1	51591.3	53226
	Urb2	4371.33	4499.67
	Dnajc21	1674.67	1877.67
	Nfxl1	109.333	173.333
	Fry	10.3333	16.3333
	Dennd4a	2870	3297
	Rap1gds1	18323.7	20824.3
	R3hdm1	416	454.667
	Btaf1	4488	5343
	Helz2	2504.67	3295
	Sec16a	1664	2543
	Raph1	1665.67	1984
	Usp32	9.33333	14.6667
	Tpr	26502.3	26461
	Morc3	9625.67	10971.3
	Dot1l	3.66667	7.66667
	Rfx7	94.3333	105.667
	Ttc37	5991	6506
	Agl	178	205
	Zc3h7b	1951	2426
	Arid4a	1916.67	2020.67
	Farp1	98.3333	139
	Usp9y	1783.67	2039
	Bicra	125.667	124
	Fryl	6024.33	7285.33
	Iqgap3	4072.33	5124.33
	Srp72	43700.7	54229.7
	Ccdc28a	112	93.3333
	Cabin1	27.3333	32.3333
	Dhx16	11806	13600.3
	Dnajc13	9250	11061
	Sec24c	26007	31462.3
	Gimap9	85920.7	92852.3
	Heatr1	16826.3	18393.7
	Arfgef1	4073.67	5175
	Kbtbd2	956.667	988.667
	Pcf11	2053.67	2250.33
	Nsmce4a	6111.33	7309.33
	Lrrc32	63.3333	58.3333
	Atp2b1	16072.3	16940
	Trip12	11621.7	14772
	Akr1b10	10701.7	8808.67
	Poglut3	164.667	227
	Zbtb11	634.667	661
	Tubgcp6	178	181.667
	Brd1	1038	1119
	Arfip1	2096.33	2216
	Aamp	4071	4636.33
	Kif14	904.667	1018.67
	Hk2	26736.3	31455.3
	Capn2	42032.7	60011.3
	Bin1	53332.3	60492.7
	Sec22b	79445	90004.7
	Kmt2b	173.667	193.333
	Dpysl2	294590	343893
	Lgals9	13193	15745.7
	Eya2	70.6667	104
	Emd	48767.7	52369.7
	Esrra	203.667	217
	Gtpbp1	37170.7	39727.3
	Alyref	218758	205056
	Clta	48284.7	58093
	Pten	1061.33	1160.67
	Endog	5847	7737.33
	Mknk1	470.333	577
	Mlx	755.333	683.333
	Myh11	9287.33	11576.7
	Map3k4	781.667	656.667
	Metap2	224606	277247
	Bcl7c	9860.67	10042.7
	Prdx6	467968	465387
	Akap1	823.333	824.667
	Bak1	37265.3	48290.3
	Casp6	3181	4066.67
	Polr2j	11042.3	8845
	Dld	81439.3	85665
	Nfil3	1127.33	1392.33
	Hsd17b10	83413.7	86599
	Ube3a	15420	16534.7
	Ogg1	888.667	898
	Tcof1	26488.3	25168
	Dctn1	224530	133710
	Mnt	298.333	287.333
	Prkcsh	50539.7	56110.3
	Serpinb9	55347.7	73977.7
	Prdx4	29253.3	29429.7
	Diaph1	53485.3	66476
	Eftud2	132302	144639
	Ercc2	2075	2151.67
	Galnt4	77.3333	83
	RO60	111	138
	Ell	4321.67	4916
	Ikzf3	23964.3	24924.3
	Bub1	485.667	490.333
	Galnt1	5933	6910.67
	Faah	8607	10103.7
	Aip	108888	126318
	Flot1	10962.7	12796.3
	Sdcbp	8338.67	9189.67
	Atox1	104419	126668
	Ncoa3	1692.33	1834
	Degs1	9679.67	13103.3
	Lfng	964	1394.67
	Pex5	876.667	1027
	Snap23	14257	26050.3
	Wrn	64.6667	86.3333
	Psmb1	338464	389035
	Hdac1	112213	125935
	Map2k3	12205.7	15004
	Ndufb11	54028.7	57368.7
	Sypl1	1900.33	2184.33
	Sema4d	20788.3	23620.7
	Nfatc2ip	7952	8141
	Gsto1	100789	103589
	Man2b1	10399.7	11734.7
	Rpl21	436476	498110
	Gclm	52858.7	58051.3
	Psmc3ip	576.667	682.667
	Vps26c	8502.67	9437.67
	Agpat1	3142.33	3366.33
	Map3k5	202	219.333
	Scarb2	5550.33	7340
	Atn1	88.6667	83.6667
	Phb2	360250	391730
	Emg1	58798.3	64084.7
	Polr1a	7200.67	7769.67
	ATP5IF1	134235	139598
	Terf2	5029.67	4869.33
	Bet1l	473.333	620.667
	Gosr2	6896.33	8001.33
	Nedd9	4861.33	6770.33
	Bhlhe40	1332.67	1117
	Gzmk	511	736.333
	Cdk2ap1	5991.33	6503.67
	Ddt	220419	256254
	Cenpa	10926.3	11093.3
	Cpsf2	21558	23968.7
	Psmd4	78504.7	89428.7
	Psmd4	4367.33	4278.33
	Tnfsf11	10.6667	16
	Ptpn9	6921.33	8001
	Nsmaf	3149.67	3793.33
	Exoc7	4939.67	5726.67
	E2f3	783.667	882.333
	Chek1	3576.67	3743
	Batf	1545.67	1626.33
	Dhx15	126795	137798
	Purb	38856.3	40644.7
	Nmi	48310.3	55856.7
	Slc6a6	494	723.667
	Srsf5	80038	89204.3
	Kpna4	56435	64696
	Kpna3	23968	27896
	Kpna6	19213.7	23711.7
	Capn1	77441.3	93751
	Ifi203	14576	15124
	Cnih1	361.667	676.667
	Abcc1	1152.33	1276
	Anp32a	517902	525529
	Exoc4	11178.7	11521.7
	Phyh	119.333	165.667
	Hax1	397.333	416
	Pld3	23752.3	32617.7
	Crcp	920.667	1085.33
	Dhodh	7744.67	8427.67
	Rnf5	535	547.667
	Atf6b	23	15.3333
	Ech1	10150	12888.3
	Fkbp8	36083.7	42491.7
	Fkbp8	1800.33	2197.33
	C1d	1400.33	1435
	Clk3	3535.67	3930.67
	Notch2	383.667	448.333
	Rabep1	2349.67	2631.67
	Psmd14	90554.7	103944
	Adam10	7076.67	7880
	Abca4	32	37
	Fyb1	24430.7	29082.7
	Npc1	4389	5096.33
	Scamp3	18218	21836.3
	Daxx	3551.67	4046.33
	Zfpm1	1179.67	1041.33
	Mdm4	44.6667	41.3333
	Pmm1	1598	1749
	Bet1	5686.67	6789
	Stag2	15714	17831.3
	Ap1b1	61269	73038.7
	Cetn3	5564.67	6330.33
	Pold2	30748.3	32525.3
	C1qbp	107799	111816
	Ifnar2	19456.3	26996.3
	Itgb1bp1	2615.33	2769.33
	Adam19	629	850
	Mrps12	605.333	553.333
	Myadm	206.333	308
	Ndufa1	18403	21212
	Nudc	136446	148348
	Phox2b	2453	2687.33
	Pnn	20807.3	25003.7
	Sptlc1	9632.33	10136.7
	Tnfrsf18	7234	7865.67
	Socs1	3.66667	15
	Socs2	495	340
	Ring1	10567	11142.3
	Hnrnph1	478800	490819
	Api5	118435	124475
	Bcat2	24817.7	29833.3
	Timm44	22544.7	24135
	Cops5	35086.7	37601.3
	Slc1a4	63.6667	48.3333
	Calu	49585.3	54681.3
	Sp100	79024	89703
	Lsm2	191473	200652
	Pik3cd	47530	29520.3
	Emp3	2729.33	3517.33
	Ctnnd2;Ctnnd2;Pkp4;Pkp4	19	21.3333
	Fxn	4838.67	4916.33
	Pitpnm1	3434.67	3264.33
	Psmb10	142762	166147
	Rab33b	335.667	373.333
	Mrpl23	22479.3	23788.7
	Zw10	13866.3	15999
	Klrd1	4366	4787.67
	Klrk1	688	896.333
	Ddost	125922	160574
	Ap3d1	11153	13759.3
	Srpk2	7760.67	8465.67
	Man2b2	8836	11730
	Dapk3	1625.67	1601
	Limk2	3215.33	3566.67
	Dffa	5343.33	6254.33
	Dffb	1323.33	1428.33
	Mafg	1928.67	1582.33
	Il16	49574.7	58006
	Bysl	28026.7	30442.7
	Mllt10	144.333	138.667
	Atp10a	261.333	396.333
	Csnk2a2	20552	22625
	Zmat3	1114.67	936.667
	Eomes	7544.67	21596
	Suv39h1	10241.3	10672.3
	Hmgb3	388700	469509
	Itgb3	2782.67	3067
	Nfkbie	263.667	282.333
	Reps1	4253.67	4547
	Bcl2l11	12602	13531
	Bnip2	1938	2849.33
	Smarce1	27855	29170
	Dnajb6	18920.7	21492.3
	Prkag1	20636.3	24049.7
	Pole2	5059	5718.33
	Lat	16199.3	17252
	Banf1	86993	91555
	Rnf13	3092.67	3464.33
	Tnk2	73	111
	Get3	35204.3	42864
	Slk	16573	18218.7
	Bnip3	5646.33	17871.7
	Trappc3	15644.3	17744
	Pgrmc1	37806.3	46472
	Impa1	112747	133474
	Bckdk	3107	3370.33
	Copb2	64590	75504.7
	Nck2	282.667	366.333
	Tlk2	126	120.333
	Tlk2	1712	1686.33
	Trdmt1	315.333	379
	Pde6d	5599.67	5881.33
	Tpmt	334	549
	Ptpn20	12236	14221.7
	Impact	348	687.333
	Stk10	39103.3	42512.7
	Syngr2	4901.67	6296.67
	Bloc1s1	4312	4747
	Strn	25862	27254.3
	Nipsnap1	12214.7	13548
	Nipsnap2	7307	7609.33
	Sap18	85411.7	89777
	Septin7	179759	195057
	Eif6	188135	232365
	Rpl35a	783351	851091
	Atp2a2	35411	40793.3
	Cbx4	3884.33	4175.67
	Supt5h	40175.7	43200
	Ilk	50740.7	62998
	Chkb	273.667	379
	Rad51d	42.6667	73.3333
	Psmb5	5417.67	5545.33
	Rngtt	9335.33	10607
	Rdh5	44	35
	Sigmar1	16557	17267.7
	Aurkb	47081.7	52093.7
	Dhx9	133674	147217
	Dhx9	1533	1455.33
	Dpm1	37181.7	42891
	Top3a	179.667	190
	Pip5k1c	140.667	266.667
	Pip4k2a	8785.33	10458
	Eif3d	95459.7	106903
	Birc5	14088	11129
	Znf143	1835.67	1814.33
	Eef1b	285194	339969
	Hmox2	40390.3	47539.7
	Ptp4a2	10645	13294.3
	Ess2	1705	1794.67
	Grk6	21443.3	23803.3
	Atxn2	553	523.667
	Nmt1	32427.3	38172
	Nmt2	12929.7	15310
	Epb41l2	12544	12787.7
	Gpx4	48749	58702.7
	Cript	10995.3	12292.7
	Rnaseh1	2464.33	2673.33
	Dxo	415	411
	Ctss	16811.7	18812
	Emc8	21704	25333
	Pdlim1	161743	184578
	Vamp8	22087	22323
	Gtf2h4	2932.33	2977
	Fhl2	4136.67	6221
	Psma3	242432	265050
	Stx7	6595.67	6331.33
	Bard1	81.3333	86.6667
	Sfn	2222.33	4300.67
	Dok2	30506	39804.7
	Tmem131	119.667	109.667
	Ugdh	3609.33	3991
	Pknox1	1	13
	Vamp4	5931.67	9159.33
	Ubr1	1833.67	1975.67
	Snx3	80265	91568
	Snx12	34682	38289
	Sp3	1310	1404.67
	Hsd17b12	72651.3	86925.7
	Kdm6a	482.667	495
	Srpk1	18333	20544.7
	Diaph2	613.333	573.333
	Smpd2	3976.67	3239.67
	Stag3	421.667	497.667
	Slc25a17	5627.67	7313.67
	Dtnb	128.667	161.667
	Cask	994.333	1169.67
	Pfdn2	117451	131506
	Cfdp1	21666.3	21496.7
	Wiz	2520	2444.33
	Znf326	4686.33	4399.33
	Sorl1	1244	1751
	Naglu	7950.67	9044.33
	Wdr1	388572	458353
	Ikbkb	13198.3	15005.7
	Baz1a	6543.33	7856.33
	Vti1b	19527.7	21255.7
	Grpel2	209	237.333
	Cxcr3	2614.33	3356
	Mtx2	8315.33	9091.67
	Klc1	8878.33	10567.7
	Klc2	1213.33	1265.33
	Dhcr7	7200.67	8950
	Capns1	93742	113775
	Znf106	30	39.3333
	Dync1i2	19205.7	21122
	Nsd1	191.667	233.333
	Dnmt3a	4835	5369.33
	Dnmt3b	147.333	157.333
	Ap1g2	26885.7	31189
	Gmnn	2579.33	2979.67
	Shoc2	3801	3496
	Ikbkg	6777.67	7849
	Ppt1	12651	13639.3
	Zfr	7963.33	8121.33
	Cops3	31884	34865.7
	Cops4	41535.7	43830.7
	Cops6	26839.7	30403.7
	Parp2	7636.67	8554.67
	Men1	3077.33	3158
	Hnrnpa2b1	5937	6788
	Hnrnpa2b1	1883878	1.95543e+06
	Aff1	5.33333	8.66667
	Sap30	4431.33	5049.67
	Comt	16833.7	18343.7
	Pglyrp1	891.667	964.333
	Becn1	2025	2751.33
	Parg	4990.33	6603
	Slc28a2	1917.67	2362.33
	Gosr1	5197.33	6076.33
	Lamtor3	29512.3	33752.3
	Brd7	2065.67	2201.67
	Rrad	771.333	1161.33
	Creg1	3094.33	3974.33
	Dgka	19242.3	22965.3
	Psmc3	145420	165418
	Ugcg	2286.67	3056
	Clpp	12537.7	13127.7
	Stk16	262.667	414.667
	Blm	98.3333	94.6667
	Orc4	4173	4299.33
	Ctbp1	30424	33076.7
	Hsd17b7	4697.33	5849.33
	Birc6	4755	5728.33
	Tom1	2439.33	2917.33
	F5	2326.33	2845
	Rpp30	24810.7	26660
	Stam2	3833	4317.33
	Sc5d	107.667	70.3333
	Jtb	1666	1978.67
	Fgd3	8267.33	8970.33
	Cradd	3465.33	3414.67
	Idh1	4993.67	6815.67
	Akap10	1229.67	1679.33
	Arl6	580.333	662.333
	Tspyl1	372	538
	Ltb4r	28.6667	8.33333
	Tpst2	784.333	958.667
	Ccnk	5221.33	6039.67
	Cd160	2500	3410
	Zfand5	2325	2561.67
	Apaf1	8769	11040.3
	Sh2d1a	102827	110268
	Hdac3	6652.33	7995
	Pias1	2830.67	3160.33
	Soat2	563.333	275.333
	Zbtb7a	2622.67	3403.67
	Nfatc1	8848.67	10412
	Lin7c	10484.7	10250.3
	Gnpda1	45026	56298.7
	Yme1l1	12211	13632.3
	Setdb1	920	1125.33
	Stx8	9910.67	12561.7
	Gcat	12479.3	17672.3
	Actn3	1451.67	2851
	Leprot	192	246.333
	Tpp1	4767	4782
	Mkln1	2923.67	3978.33
	Itm2b	7316.67	9352.33
	Coro1a	2.40183e+06	2.66618e+06
	Cope	45444.3	51934
	Rbm3	559656	653177
	Sp1	2822.67	2833.33
	Cst7	7090	7546
	Grap2	163680	203173
	Kcnn4	679	900.667
	Casp8	52915.7	62304
	Lancl1	14523.7	14480
	Ier5	68.6667	91.3333
	Vti1a	3926.33	4553.33
	Mt-Cyb	1650.33	2202
	Dhfr	168514	188859
	Mtco1;mt-Co1	5034	6385.67
	Mtco2;mt-Co2	279940	332508
	mt-Co3	1402	1375
	Hprt1	411480	496660
	Mtatp6	758.667	1248.67
	Odc1	53	153
	Ca2	3365.67	3918.67
	C3	6445	6979.67
	C4b	353.333	489.667
	Fos	150.333	64.6667
	Myc	63.3333	23.6667
	Ins1	0.1	93.6667
	Ifng	356.333	676.333
	Il2ra	2030.33	1552.67
	Cd8a	42237.3	48140.3
	Thy1	2.11091e+06	2452766
	Tcra	23824.3	28793.3
		70685.3	86497
	B2m	178656	251387
	H2-D1	331311	404026
	H2-K1	319958	410907
	H2-K1	351.333	422.667
	H2-Aa;H2-Aa;H2-Aa;H2-Aa;H2-Aa;H2-Aa;H2-Aa;	216.333	127
	H2-Ab1	167	286.333
	Hba	888726	1.03393e+06
	Hbb-b1;Hbb-b2	461256	634140
	H3-5;H3-3a	37689	123551
	Col4a1	169	187.333
	Lamc1	21	19
	Mt2	5834.33	7997
	Mt1	4466.67	6205.67
	Mtnd1	9599.67	18303.7
	Mtnd2;mt-Nd2	1928	2382
	Mtnd3	3080.33	2403.67
	Mtnd4;mt-Nd4	3384.67	4028.33
	Mtnd5;mt-Nd5	1580.67	2307.33
	Mtatp8;mt-Atp8	51213.7	53825
	Ada	22780.3	30042.7
	Iap	8501.33	10349
	Gfap	541	646.667
	Tk1	41830.3	48289
	Gzmb	1.20318e+06	1783219
	Tgfb1	6181	6530.67
		9122	11668.7
		162.333	218
	H2-K1	2347	4111.67
	Cd3d	51806.3	58029.7
	Mbp	3370	3833.33
	Araf	7499.33	8001
	Prnp	1260	1286.33
	Aldoc	79772	109348
	Aldoa	2.0224e+06	2.57255e+06
	Prkaca	6644	7939.33
	Got1	75848	81061.3
	Got2	423880	478001
	Ly6a	10349	19303.7
	Jun	298.333	442.333
	Myl1	284	136.333
	Ldha	3.06129e+06	3.57257e+06
	Lck	129010	143498
	H2-T23	4405.33	5591
	Nr3c1	4800	5687.67
	Gpi	390133	477545
	Abcb1b	1988.33	2144.67
	Ptprc	339637	384576
	Pim1	9055.67	9120
	Tnf	8226.67	12318.3
	Myb	769	815.333
	S100a4	384773	634323
	Anxa2	1.07081e+06	1.36318e+06
	Tyms	41428.7	52937
	Alb	57419.7	58491
	Rrm1	128547	152366
	Hsp90aa1	538012	627653
	Ercc1	1617.67	1509.33
	Pdia4	108420	125257
	Aprt	165605	197522
	Zfp2;Znf182	35.6667	26
	Egr1	65.3333	39.6667
	Hsp90b1	412216	513220
	Egr2	18.3333	16.3333
	S100a10	199152	234051
	Sod1	822057	843851
	Mdh2	1.19062e+06	1349885
	Camk4	18697.3	22118.3
	Nras	67787	79041
	Gnai2	302025	344112
	Polr2a	19370.7	21275.3
	Gzmc	5445.33	8158
	Gzmf	323	412.667
	Gzme	3486.67	6198
	Cd2	41952.3	48632.7
	Pgk2	2793	3204.67
	Itgb1	17234.3	19790
	Lif	9159	18658
	P4hb	275591	344112
	Lta	61.3333	149.667
	Ncl	1.16116e+06	1.20031e+06
	Pgk1	2.34906e+06	2606038
	Junb	1293.33	1449.33
	Fth1	29973	36978.7
	Hmgn2	270481	235165
	Sod2	46553.7	48849
	Ctla4	1631.67	1722
	Cdh1	1440.33	600.333
	Surf1	6688.33	7268.67
	Surf2	5605.33	5759
	Chmp6	5096.67	5754
	H2az1;H2az2	844377	819495
	Psmg4	11650.3	12038.7
		4221	6589
	Tagap1	228	220.333
	Derpc	4301	4862.33
	Chtf8	5482	5134
	Ubb;Ubc	235.667	299.667
	Ly6c2	52057.3	65941.3
	Pet100	1114.33	1410
	Pet117	1851.67	1708.67
	Ndufb1	14741	18794.7
	Tmem254a;Tmem254b;Tmem254c	14348	17637.7
	Ifi204	153.667	607.333
	Calm1;Calm2;Calm3	134403	147416
	Eef1akmt4-Ece2;Eef1akmt4-Ece2;Eef1akmt4	577.667	726.333
	Anxa1	20464	34496.3
	Eef1a1	5.04004e+06	5787587
	Ccl1	6204.67	4419.33
	Cd8b	150333	164885
		2281.67	2398.33
	Bcl2	27578	29604.7
	Alad	22233.7	33290.3
	Ctsb	24169.3	31101.7
	Eif4a2	12457.3	13573.3
	Txn	1.79556e+06	2.02557e+06
	Gstm1;Gstm2;Gstm7;Gstm4	230.333	223.333
	Tcea1	89762.3	95688.7
	Prf1	1424.67	2675.33
	Rras	12489	14317
	Slc3a2	57392.3	58978
	H2bc7	6.83092e+07	69028152
	H2bc14	3197.67	4644.67
	H1-0	14847	15956
	Spp1	437.667	173.667
	Sub1	946192	1.06387e+06
	Gzma	334404	618261
	Gzmd	2857	1056.33
	Col1a1	148.667	148.333
	Parp1	32833.3	28068.7
	Lpl	26.6667	55
	Rrm2	69719.3	81371.3
	Fn1	14924	15102
	Gpx1	77939	84624
	Lamp1	13190.3	15794.3
	Cdk1	237606	262456
	Hsp90ab1	2.17927e+06	2.38526e+06
	Cd1d1	439.333	493
	Cfp	7.66667	7.66667
	Itgb2	147017	181319
	Itpr1	221.667	292.667
	Nudt19	977	1206
	Cd3g	85643.3	103060
	Tcp1	1171.33	987
	Tcp1	352203	391874
	Gusb	16703	18271.7
	Prkar2a	12973.7	15391
	Pfkl	37066.7	43616
	Ctla2a	5081.33	6958
	Cox5a	62571.3	68407
	Fgl2	1845.33	3083.33
	Nr4a1	139.667	62.6667
	Pdcd6	76924	88351
	Rpl7a	981145	1.06472e+06
	Scd2	4224.67	4828.67
	Gsn	23185.7	31740
	Cd5	9812	12885.7
	Rb1	3254.33	3607
	Umps	100626	113283
	Icam1	9652.67	11632.3
	Srgn	1037	1417.67
	Msh3	870	896.333
	Slc4a2	234	212
	Dnmt1	93378.3	102902
	S100a6	249682	392225
	Ccl4	1150.67	1309
	Rpl27a	855463	978436
	Rps16	1.7186e+06	1988290
	Rpl7	998415	1.09575e+06
	Mdh1	603385	618438
	Rpsa	1230616	1409539
	Calr	532998	600392
	Fgr	692	906.667
	H2-D1	1323.67	1536.67
	H2-D1	21319.7	28233.3
	H2-Q7	69299.7	95444.7
	H2-Q8	7114	8828
	Srp54	42829.7	51145.3
	Psmd3	132054	152428
	Lmnb1	726016	695620
	Anxa6	1.51581e+06	1767007
	Rplp0	860371	983720
	Hmox1	951	978
	Jund	5830.33	5339
	Glul	2496	2957.33
	Ifngr1	9200.33	13139.3
	Rel	8828.33	9267.67
	Irf1	179.333	251.333
	Cd44	8366	10331.3
	Nme1	555276	690672
	Trim30a	148.667	186.667
	B4galt1	3407.33	4954.33
	Spn	91661.3	100516
	Tcf3	655.333	750.333
	H1-2	2.74494e+06	2495574
	Atp6v0a2	3753.67	4350.33
	Lgals1	4029927	5.5643e+06
	Lgals3	251332	303746
	Ldhb	3880	4488
	Srp14	62145	73007.3
	Il2rb	3451.33	3832
	Cnp	52302.3	63057.7
	Mmut	29786.7	26994
	Il4r	1622.67	2111.33
	Ass1	78111	115591
	Sptan1	77706.7	91520.3
	Hspa1l	43979.3	50117.3
	Ctsa	10613	13789.3
	Gapdh	8.45493e+06	9.94775e+06
	Atf2	900.333	1042
	Zfx;Zfa	909	797
	Lamp2	12360.3	14627.3
	Hmga1	32063.3	21380.7
	Hmga1	28649.3	16319
	Hspa2	40646.3	54871.3
	Eno1	5467093	6045459
	Eno2	779603	936067
	Ptbp1	388732	411261
	Ap2a1	31624.7	37602.7
	Ap2a2	18588.3	22046.7
	Gba	6556.33	8092.33
	Selenbp1;Selenbp2	713.667	709.667
	Cox7c	35691.3	37915
	Hk1	87992	105096
	Ppia	9.61948e+06	1.14102e+07
	Tpi1	1380512	1.55637e+06
	Slc2a1	5777.67	8137
	Hspa1b;Hspa1a	1706	3163.67
	Lyz1	4005	686.667
	Pcna	1359181	1.52935e+06
	Ptpra	2888	3357.33
	Mthfd2	34583.7	40263
	Cd48	116332	133525
	Ctsd	213768	261394
	Sell	4440.33	3000.67
	Bsg	21407.7	21643.7
	Hmgn1	7791.67	5908.33
	Rps6ka1	20790.3	28355.7
	Rps6ka3	67490	77839
	Cfl1	6.92653e+06	7830304
	Il10	291	483.667
	Ar	7.66667	9
	Fasn	121482	181900
	Gstp1	354264	397857
	Ifrd1	832.667	847.667
	F2	12473.3	17360.7
	Nefh	848.667	1093.33
	Rpl13a	771043	833935
	Mpv17	639.333	754.333
	Nelfe	10571	10662.7
	Cox5b	130271	130149
	Cox4i1	438330	476675
	Lsp1	514968	551399
	Hspa5	543379	654625
	Hexb	35038.7	41360
	Tmsb4x	441390	485260
	Prdx3	136374	149498
	Vim	3915391	4.20773e+06
	Tnfrsf9	12153.7	15405.3
	Prkca	5825.67	6288.33
	Fcer1g	683.667	1074.33
	Prim1	25633	28154.3
	Evi2a	103.333	293.667
	Tpm3	779598	857505
	Tpm3	800884	867283
	Ubl4a	27298.3	32405.7
	Gna11	4167.67	4464.33
	Gnaq	928	663.333
	Abcb1a	5155.67	6350.67
	Cst3	4445.33	4941.67
	Eno3	393974	529776
	Lmnb2	95924.3	98828.3
	Mfge8	4589.33	4760
	Tap1	68262.7	89211
	Tgm2	7045.67	7406.33
	Emb	41579.7	52410.7
	Myd88	8964.33	10807
	Clk1	459.333	574
	Cd3e	96123.7	110088
	Cbl	18037.7	21162.3
	Ap1g1	20652	24771.7
	Hmbs	19060	23268.3
	Eif3a	138882	134589
	Furin	66.6667	142.667
	Cbx3	648017	689636
	Mov10	19125.7	18428.3
	Prkch	12824	14763.7
	Ggta1	888.333	981.333
	Bmp7;Bmp5;Bmp5	372.667	397.333
	Xrcc6	22224	22211
	Pnp	128619	154130
	Pcmt1	47265.7	54259.3
	Tsta3	27388.3	29095.3
	Irf8	2238.33	2649.33
	Nfya	2666	2569.33
	Gata3	381.333	469.667
	Glb1	9859	10946.3
	Pcgf2	192	200
	Irf2	2276.33	2464.67
	Zfp36l2	3421.67	3545.33
	Zfp36l1	515.333	713.333
	Itgal	125401	159344
	Cd247	94904.7	110965
	Cat	63348.7	75123.3
	Bcat1	2922.67	3102
	Ppib	739416	880098
	Capg	55181.7	55368
	Lta4h	243772	269926
	Impdh2	187920	208530
	Acp2	1095	1391.33
	M6pr	36721.3	45404.7
	Cdk11b	19337.3	20139
	Ccnb1	6837	8092.67
	Tnfrsf1b	1099.67	1265.67
	Mcm3	267203	282934
	Pou2f1	2316.33	2429.67
	Rps2	1158701	1308725
	Fas	39.6667	58.6667
	Nfkb1	30053.3	34557
	Lyn	345.333	414.667
	Bmi1	98.3333	102.667
	Ubtf	42859.7	44754.7
	Itgb7	8252.67	9316.33
	Tln1	168663	203709
	Ezr	189376	210387
	Msn	660630	752904
	Rdx	568023	666832
	Ctnna1	8706.33	8033
	Fli1	38566.3	39699.3
	Ptma	3.82844e+06	3798399
	U2af2	173032	182680
	Glud1	187404	196584
	Pik3r1	14122.7	15865.3
	Psmd7	85988	91523.7
	Sars1	91016	109967
	Marcks	142.333	243.333
	Fkbp1a	344617	381756
	Man2a1	11906	15109.7
	Snrpb;Snrpn	348274	391171
	Map4	41600	46599.3
	Ets1	8163.67	10230.7
	Gna13	31844.7	36212
	Plaa	39451	44266.7
	Xrcc5	21724.7	22399.3
	Rpl3	600023	674564
	H2ax	21914	15804.7
	Crem	1041	686
	Pdia3	913062	1.15589e+06
	Lef1	2082.67	2234
	Mgat1	6299	8331
	Vav1	39057	47596
	Braf	92	89.3333
	Cebpb	173.667	174.333
	Psmb8	261957	297797
	Psmb9	90779.3	108564
	Aco1	16692.3	21996.3
	Apex1	63038.3	58645
	Adh5	135680	147562
	Col2a1	72.6667	82.6667
	Max	12564	13107.7
	Adss1	270.667	382
	Nap1l1	226911	247014
	Atxn10	26133.3	30102.3
	Celf1	22587.7	26490.7
	Nckap1	3024.67	3446
	Mug1	467	483.333
	Marcksl1	631.667	653.333
	Rxrb	3008.67	3343
	Kif2a	150	155
	Kif2a	33546	37472.7
	Grn	412	557
	Dpp4	21676	24836.7
	Prkcd	4585.33	5566.33
	Tbp	4586.33	5089.67
	Pabpc1	349624	402013
	Ptpn6	251948	259164
	Ptpn22	5824.33	7047.33
	Ftl1	41145.3	39026.3
	Hexa	3608.67	3965.67
	Casp1	5706.67	6304.33
	Casp2	5083.67	5453.67
	Nedd8	106817	119056
	Ahsg	8985	12113.3
	Oat	54811.3	64939.7
	Ccnb2	3768.33	4480
	Ccnd2	790	903.667
	Ccnd3	2102.33	3306.67
	Cdk4	27201.7	29208
	Ppic	62873.7	72254.3
	Nktr	1819.33	2020
	Fkbp4	193658	211461
	F2r	1629.67	1777
	Cbx2	36.3333	42.6667
	Hmgb2	2583891	2578436
	Ccl5	1317.33	2192.33
	Tbxa2r	585	665.667
	Des	284	129.333
	Cd28	20000.7	22277
	Aimp1	112243	126591
	Rbpj	11588.7	14833.3
	Prkar2b	1378.33	1378
	Akt1	44210.3	55696.3
	Dbi	163967	214531
	Map2k1	23389	26485.3
	Scp2	42275	52366.7
	Slc2a3	5818.33	7381.33
	Ssb	263438	286897
	Drg1	58823.7	65453
	Serpinc1	44771.7	49254.7
	Kras	8152.67	10070.7
	Wars1	85557.7	94857.3
	Kif4	19975.3	21629.3
	Nedd1	24235	14130.7
	Pola1	19732.7	21452.3
	Prim2	25703.7	27881.3
	Pola2	22462	23222
	Ranbp1	399884	438568
	Mif	1.51365e+06	1649767
	Il2rg	10706	13013.7
	Usp4	25682.3	30894.3
	Ptpn11	12405	14314.7
	Rab3d	25353.7	34861
	Rab5c	85418.7	100246
	Rab6a	46340	54156.3
	Rab6a	370.667	425
	Rab21	81848.7	97363
	Rab22a	10432.3	11324.7
	Rab24	3388.67	4235
	Rab17	258005	270745
	Rab18	66874.3	80377.3
	Rab19	5666.67	9129.33
	Icam2	2792.67	2972
	Thbs1	313.333	379.667
	Ly6g	522.333	0.1
	Pdha1	110176	119784
	Fah	639	765.667
	Fbl	338788	330794
	Canx	215691	265342
	Ap1m1	69706.7	82854.3
	Rfc1	13039.7	14441
	Prdx1	2207764	2.47926e+06
	Ttk	715	917.333
	Ptpn1	39227.3	42204
	Ptpn12	2620.67	3345
	Fmr1	193	225
	Fmr1	13027.3	14963.3
	Ldlr	4175.67	7488.67
	Rpl12	1004413	1.13784e+06
	Rpl18	871092	920824
	Btk	2.66667	2.33333
	Tap2	66720.7	84415
	Sar1a	42289.3	60915
	Cpox	22182	24545.7
	Gnl1	7446.33	8490.67
	Ppm1b	19965.7	22987.3
	Por	30372	37936.7
	Cd69	2863	5108.67
	Lig1	93980.3	98427.3
	Hmgcl	13373.3	15025.3
	Hsf1	272	331.333
	Hspa9	314132	331514
	Dnm2	72630	84545.3
	Man1a2	1486.67	1764
	Traf1	4658.33	6090
	Traf2	3823.67	4183.33
	Tjp1	893	460.333
	Fyn	30041.7	35637.7
	Cdkn1a	341	570.333
	Fen1	109327	114207
	Cap1	722466	853341
	Tkt	775438	848274
	Chd1	2633.33	2924
	Cd82	7432	8253.67
	Vps26a	17042	18300.7
	Vhl	1696.33	1880
	Tfam	21369.3	21424.7
	Ighmbp2	623	777
	Rpl28	683728	737999
	Ltb	94.6667	80.3333
	Elk4	94.3333	108
	Acsl1	820	965.333
	Kdm5c	194.667	242.667
	Abca2	13	18
	Csk	125996	147159
	Cd27	16536.7	21544.3
	Eci1	48322.3	57287
	Foxk1	9768.67	10633.3
	Septin2	71694	83457.3
	Septin1	294031	347809
	Stat1	170736	245711
	Stat3	140	165.667
	Stat3	31314.3	38832
	Stat4	39943	49612.3
	Stat5a	4737	5091.33
	Stat5b	34555.3	35526.7
	Pik3ca	38.6667	50
	Eps15	10117.7	11182
	Pura	39424.3	43141.7
	Txk	1445.67	1655.33
	Htt	2606.33	3081
	Dpagt1	397	474.667
	Cct8	405534	456309
	Cox6a1	8895.67	11971.3
	Msh2	34480.3	37679.7
	H1-4	3.61591e+06	3.37306e+06
	H1-1	1.88357e+06	1.5973e+06
	H1-5	6.10609e+06	5.90824e+06
	H1-3	1.63478e+07	15581043
	Egr3	72.6667	101.667
	Dck	36584.3	45422.3
	Zap70	102553	120368
	Itgav	3302	3472.67
	Akr1b1	323141	356072
	Crebbp	1907.33	2211
	Man1a1	2783.33	3588.33
	Fkbp2	116010	133441
	Acadm	24867	27221.3
	Rangap1	111910	131620
	Sipa1	11524.7	13220.7
	Cdkn1b	8014.67	8210.33
	Nsf	45977	49541.7
	Vps4b	55211.7	63369
	Psmc2	164997	184267
	Rab11b	300318	344524
	Fdx1	5648.67	6974.67
	Nf2	2355	2544.33
	Adss2	110293	120877
	Pdcd2	12037	14415.7
	Brcc3	13295.3	14407.3
	Nedd4	9199.33	11156.7
	Stt3a	25574.7	31854
	Cryz	1606.67	1340
	Tes	47828.7	53838
	Aldh2	2598.67	2383.33
	Aldh3a2	12397	14257
	Capza1	465412	556645
	Capza2	176762	201469
	Capzb	662070	764797
	Srprb	42015	48229.7
	Ccr7	1796.33	1391
	Gsr	39334	44082
	Mtx1	13491	14752.7
	Map2k4	16696.3	20401
	Mapk14	28330	34533.7
	Gfpt1	20149.3	25652.7
	Pfkm	14472.3	17030
	Rpl6	882016	998495
	Rpl29	295461	272091
	Fosl2	684.667	800.333
	Crkl	55114	62429
	Rplp1	56727	58219.3
	Rpl5	535807	619091
	Rpl13	1003523	1095076
	Rpl36	454991	522890
	Rpia	25404.3	32051.3
	Xcl1	1299	4575.67
	Eif1	198222	245572
	Anxa5	210958	252970
	Epb41	9285.33	10156.7
	Rfx1	5808	6108.67
	Abcd1	5639.33	5762
	Tbca	152552	161636
	Idua	55.6667	68.3333
	Ppp3cb	6732.67	7591
	Ppp3cc	1798.67	1872
	Lmna	9864	11183.7
	Hspa4l	9210	11139
	Pcnt	4382	4501.33
	Brca1	333.333	389.333
	Cbr1	48072	57575.7
	Fpgs	163	203.667
	Cox7a2	9505	11152
	Slc25a4	225850	248986
	Cit	3374.33	3972
	Nr2c2	2642.33	2815.33
	Ercc3	2275	2521
	Mapkapk2	6529.67	7677.33
	Serpind1	306.333	432
	Slc11a2	143.667	195.667
	Hnrnpa1	609913	664814
	Inpp1	10553.7	13840.3
	Ppm1a	7070.67	8236
	Ptpre	2580.67	3309.33
	Cenpc	4058	4229
	Pcyt1a	1742.33	1806.67
	Cdk5	8525	9098.33
	Hcls1	166273	189605
	Mcm4	179651	188586
	Mcm5	282189	302034
	Psma2	260295	297040
	Psen1	3868.67	3984
	Flt3lg	78	77
	Srp9	66689.7	78501.3
	Impdh1	29675.3	31635.3
	Bckdha	1543	1509.33
	Hsd17b8	14614.7	14136.3
	Hsd11b1	22342.7	30520.3
	Ahcy	248599	262827
	Cd7	559.333	639.667
	Nat2	6699.67	7590
	Gdi1	13053.3	16058.7
	Sts	2976.67	2976.33
	Arsb	10271.3	14805.7
	Shmt1	53962.7	53461.7
	Atp6v1a	61377.3	74439
	Atp6v1e1	33251.7	38209
	S100a11	76350.7	96345.3
	Acadvl	40588.7	45999.3
	Pa2g4	549666	578337
	Tspo	3446	6142.67
	Cast	23403.3	26558.3
	Cast	68.3333	102.667
	Rab7a	320852	371921
	Uros	428	425
	Acadl	112439	128810
	Ppox	9884	13025.3
	Rpl9	660119	768884
	Plcb3	30.3333	36
	Gla	3204	3554.67
	Xpc	200	253.667
	Hsd17b4	21864	26536.7
	Ccr5	3693.33	6232.33
	Ccr2	477.667	1117.67
	Clcn3	950.667	1188.67
	Dynlt1	21703.3	26866.7
	Adcy7	1564.67	1979
	Gss	4442	4784.33
	Hdgf	181950	169471
	Atp6v0d1	8246.33	9944.67
	Slc25a5	1891195	2151550
	Slc1a5	14765	16912.7
	Ccna2	11807	12816.3
	Mnat1	11473.7	12506
	Mybl1	517	435.667
	Sqle	3039.33	4207.33
	Kpna2	86556	98891.7
	Jak1	11806	14357.7
	Pold1	34663.7	39153.3
	Polr1c	10168	11054.3
	Usp10	8820	10089.7
	Pkm	4517.33	5874.33
	Pkm	2792996	3.24596e+06
	Ube2e1	20612.7	21022
	Ube2e3	1606.67	1880
	Ndufs6	23081	25651.3
	Uck1	3908.33	4471.67
	Upp1	54.3333	36.6667
	Stat6	10815.7	12698.3
	Rida	12994	12382
	Cpt2	7909	8209.67
	Sult1a1	624.667	920
	Tmem165	9251.33	10238.7
	Tia1	20633.3	22741.7
	Rpl10a	747393	826819
	Map3k1	62	96.6667
	Nudt1	411.333	416.667
	Dbt	13174.7	15605.3
	Cux1	490.667	493.333
	Cebpz	7664.67	8512
	Rabggtb	3004	3344.67
	Limk1	72.3333	144.333
	Hccs	15969.7	18545.7
	Arnt	489.667	534.333
	Fdft1	2341.67	3465.67
	Pctp	1418.33	1312
	Pitpna	63667.3	74382.3
	Pitpnb	55392.7	66142
	Slc16a1	15101.3	15790.7
	Rab2a	157697	190792
	Anapc1	4883.33	5628.67
	Cnbp	38829.3	46282.7
	Cnbp	130705	143912
	Idh2	23736.3	24421.3
	Dnajc2	33493	36980.3
	Stmn1	1.34524e+06	1.29671e+06
	Atxn1	1361.67	1726.67
	Msh6	26930.3	29001.7
	Pms2	1096.67	1134
	Rad23a	10303.3	10913.3
	Rad23b	78812.3	86682.7
	Nub1	30616.3	34577
	Faf1	10908.7	13192
	Psmc4	102536	116789
	Tango2	916.333	1197
	Adsl	82296.7	89540.3
	Ddx6	105860	126870
	Adprh	52088	54135
	Slc12a2	12.3333	15
	Gem	2371.33	2977.33
	Abcd3	1487.33	1653
	Sh3bp1	60229	65917.3
	Kmt2a	138.667	150.333
	Rab8a	101571	128591
	Adk	33425	32173.7
	Lrpap1	10047.3	12042.7
	Entpd1	14435.7	20311
	Golga3	3241	3398
	Atp5mf	422150	480645
	Rrp1	14056.7	15144.7
	Ctsw	34477.3	44642.3
	Arpp19	170186	198145
	Gfer	2031	2356.67
	Acyp1	52141.7	58704.7
	Atp5mpl	44179	54377.3
	Nudt2	21447.3	25717.7
	Atp5f1e	133929	159630
	Atp5mc2;Atp5mc3;Atp5mc1	0.1	82.3333
	Cks2	7592.67	9882
	Cox6b1	431256	518942
	Cox7b	8086	7393.67
	Cox17	5623	6392.33
	Cyb5a	92781	95400
	Usp5	64619.3	77437.3
	Atp5f1b	1390685	1545163
	Ucp3;Ucp2	170	166
	Dnase2	50	96.6667
	Ctbp2	630	712.333
	S100a1	396.667	3800.33
	Tdg	1546	1728
	Maz	3307.67	3451.67
	St14	168.333	172.333
	Pdcd5	105529	121560
	Znrd2	1803.67	1955.67
	Fus	170239	169899
	Exosc10	21784	22580.7
	Usp25	8948.33	10433.3
	Ncstn	10292.3	12522.7
	Samsn1	4077	4774.33
	Atp6v1d	10757	12865.3
	Erp29	66972.3	76838
	Eef1d	5075.33	5687.33
	Eef1d	371263	414767
	Actn4	165148	187466
	Snrpa1	164186	173107
	Slc16a3	10283	13075
	Rce1	1395.67	1707.67
	Tm9sf2	16763.3	20440
	Sesn2	135.667	264.667
	Idi1	44187	61179.7
	Nadk	1745.67	2071.33
	Mrps21	13139.3	14813
	Mrps6	13416.7	12968
	Rasa2	3147	3293.33
	Acot8	9792.33	11809.3
	B3gat3	1282	1242.67
	Smpdl3b	379.333	379
	Eef2	1.37219e+06	1.59157e+06
	Opa1	7936.67	8474.33
	Klf16	1385.67	1287.33
	Ptpa	76773.7	84009.7
	Strn4	6061.67	6993.33
	Foxp1	13761.3	14961.7
	Ctdsp1	3200.67	3453.67
	Fam207a	21859.3	22979.3
	Paxbp1	9906.67	12157.3
	Btbd1	2023.33	2368
	Aaas	15072.7	16503.7
	Tm6sf1	957.667	1098
	Tpm1	11347.7	11955.3
	Tbc1d10a	3941.33	4519.33
	Tubgcp3	7928.67	8315.67
	Tnks1bp1	360	299
	Gmeb2	4045.67	4786
	Vps33b	6535.33	7603
	Bcl2l13	9764.33	10091.7
	Pdrg1	59.6667	132.333
	Cpne2	476.333	563
	Senp1	2191.33	2297.67
	Pcif1	4955.33	5634
	Nup43	18134.7	20241.7
	Rab2b	954.667	1078
	Eif5	109963	321964
	Ythdf1	9442.67	9850.33
	Wdhd1	15412.3	17785.7
	Hps5	281.333	378.333
	Polr3b	1119.67	4309.33
	Lman2l	656.667	695.333
	Anks1a	142.667	174.667
	Sf3b6	82588.7	88714.3
	Rin3	2879.33	3619.33
	Mrtfb	252	232.667
	Pcmtd1	37	43.3333
	Sirt6	2518.33	2660
	Kdm2a	6559.67	7535
	Arpc4	815935	1.03741e+06
	Elof1	5422.33	6041
	Sec61g	112188	138771
	Ruvbl1	150839	165301
	Eif3e	150588	176722
	Espl1	1008.33	1153
	Pcbp1	425263	499897
	Pdxp	4802.33	4849
	Gabarapl2	37936.7	48695.7
	Romo1	14210	17701
	Ube2g2	7792.67	10131.3
	Nploc4	18227.3	20218.3
	Actb	11635721	1.33741e+07
	Morf4l1	26218.3	30100
	Cdc42	615042	735719
	Cdc42	1255	1371.33
	Cirbp	37973	39667.3
	Ensa	46583	51136
	Eif4a1	1.41673e+06	1618886
	Rps20	798709	924678
	Polr2i	14191	15034.7
	Dnajc5	6881.67	7025.67
	Rab5b	10013.3	10951
	Chp1	5129	5901
	Cks1b	6900.33	10238
	Rab10	82135.7	105930
	Rab8b	42849.3	57319
	Ube2d3	227307	277993
	Ube2d1	4902.67	5448.67
	Ube2m	114473	108796
	Ube2k	167202	185459
	Ube2n	345353	387179
	Actr2	439377	555024
	Actr1a	35482.3	40646
	Tmem258	10466.7	11209
	Cops2	32790.7	36967.3
	Arl4c	661	1194.33
	Arl1	36877	46597
	Taf13	0.1	230.667
	Polr2f	9233	9178.33
	Abce1	96780.3	109834
	Rap2b	9994	11321.7
	Rpl26	833985	916036
	Psme3	115390	156588
	Magoh	210503	241396
	Rpl27	1.24112e+06	1.34052e+06
	Smg6	1544.33	1718
	Depdc5	200.667	167.333
	Rpl37a	319016	374768
	Naa20	5692.67	6363.33
	Sec61a1	38259.7	46038.3
	Arf4	17797.3	21541.7
	Vbp1	54861.3	67203.3
	Dad1	70639.3	71782.3
	Copz1	63863	64774
	Sumo2	54178.3	65388.7
	Ufm1	72427.3	86179.7
	Dcaf7	9707.67	10625.3
	Wdr5	45088.7	44118
	Ap1s1	40216.3	43593.3
	Lmo4	1469.33	1604
	Nutf2	105939	109567
	Hnrnpk	1131540	1.23666e+06
	Hnrnpk	2910.67	3303.67
	Ywhag	124465	135294
	Lrch1	3869.67	4499.33
	Usp46;Usp12	464	599.333
	Rras2	140913	162069
	Timm10	14082	17059.3
	Timm13	72078.3	84335.3
	Timm8b	1372.67	2819.67
	Rps7	1.06358e+06	1.20395e+06
	Ppp1ca	97365.7	110816
	Ppp1cb	48892	52331.7
	Psmc1	117888	136826
	Psmc5	134763	148174
	Rps8	1.22276e+06	1.44109e+06
	Rps15a	1.12505e+06	1.36246e+06
	Ube2g1	12643.3	22059.3
	Ube2h	25898.7	34914
	Ywhae	707629	770991
	Rps14	1.04073e+06	1126436
	Rps23	636571	716537
	Rps18	1601644	1.84095e+06
	Rps29	348919	420621
	Rps11	1098315	1.25693e+06
	Rps13	1267243	1.44292e+06
	Snrpe	394581	448300
	Snrpf	209783	233048
	Snrpg	278975	317953
	Lsm3	46278	44775
	Lsm6	128771	131671
	Snrpd1	408218	451025
	Snrpd2	633514	667943
	Snrpd3	534042	630138
	Lsm5	23348.7	19975.3
	Arf6	114305	140024
	Psmc6	138025	161560
	Tbpl1	8037	9681
	Selenot	12604	16514.7
	Kcnab2	125120	147128
	Polr2g	40248	43427
	Dynlrb1	43120.7	50209
	Ypel5	6217.67	7794
	Rps4x	1.45257e+06	1643714
	Ppp2cb	156888	179902
	Rpl18a	640892	776500
	Ap2s1	27939	42640
	Hpcal1	51973.3	59834.7
	Rpl23a	931825	988372
	Rps6	784173	862927
	Mtpn	49431.7	48197
	H4c1	83035131	8.47109e+07
	Atp6v1b2	42650.3	52440.3
	Rab1A	137309	162967
	Ran	1.93281e+06	2.15624e+06
	Rpl23	1191530	1.37393e+06
	Rap1a	43798.7	50616.3
	Rps15	409075	470569
	Rps24	393717	498907
	Rps25	1.22794e+06	1.35491e+06
	Rps26	582165	654929
	Rps28	1.35819e+06	1.49236e+06
	Fau	698424	817284
	Elob	192436	217829
	Gnb1	167019	191000
	Polr2l	36384.7	41513.3
	Rbx1	50865.7	54255
	Gnb2	81078.7	94064
	Rpl30	1225415	1.48283e+06
	Rpl39	126081	158168
	Cycs	303032	367491
	Rpl31	795448	874950
	Rps3	2.30281e+06	2.58406e+06
	Rpl32	493496	565860
	Gtf2b	30020	32549
	Rpl8	578677	620680
	Ybx1	267803	270897
	Pfn1	15344959	16783782
	Rps27a	136267	167940
	Uba52	7.22686e+06	8.03584e+06
	Tra2b	123725	135092
	Rac1	1.03179e+06	1246924
	Tle5	520.667	574.667
	Pafah1b1	91410.3	104339
	Hspa8	2.84371e+06	3.25374e+06
	Vamp3	32285.3	34427.3
	Tpt1	496727	561427
	Mpc1	7461	8486.67
	Dnaja1	92663	107895
	Hspd1	644539	722772
	Vamp2	4115.67	4774.67
	Eif4e	92748.3	95352.7
	Atp6v0c	8801.33	14314.3
	Mapk1	154028	176999
	Ppp1cc	239615	300014
	Gnas	39816	46238.7
	Ywhaz	1.52849e+06	1.71314e+06
	Nfyb	8732	9014.67
	Kcnab1	400.333	812.667
	Ube2b	3842.33	4327
	Crnkl1	18469	20290.7
	Hmgb1	1.15467e+06	1091211
	Sumo1	76373.7	82642
	Dynll1	92092	102308
	Gng2	5993.33	5890.33
	Eif5a	2.099e+06	2.2947e+06
	Crip1	986931	1.15469e+06
	Actg1	777995	942631
	Supt4h1a;Supt4h1b	32265.3	35976.7
	Rps17	730417	795795
	Ube2i	360458	399630
	Selenow	913.333	894.333
	Rala	22492.7	24912
	Rps12	764398	964193
	Rps10	921276	1.08584e+06
	Ppp3ca	21517.7	26592.7
	Ppp2ca	11712.3	13501.3
	Phb	332084	364125
	Csnk2b	76747.7	86174.7
	Rpl22	959060	930756
	Actc1	37455713	4.29476e+07
	Ube2l3	448343	507529
	Rack1	1458291	1670332
	Acta1	172718	165911
	Prkacb	60736.3	69039
	Ywhaq	421137	543012
	Tuba4a	716983	851003
	Tuba1a	5715526	6419890
	Tubb4b	5.02006e+06	5.86198e+06
	Tuba1c	191651	167391
	Prkcb	8709.67	9492.33
	H3c1	17108.3	51030.7
	Ywhah	391783	443940
	Ranbp9	9647.33	11650.3
	Zhx1	51	62.6667
	Sbds	50926.7	52242.7
	Smpdl3a	1680.33	1724.67
	Kpnb1	214979	234933
	Pip5k1a	1422.33	1664.33
	Traf5	575.667	662
	Psmb7	48577	53012.7
	Traf6	2613.67	3029
	Lxn	5733	7403
	Map4k1	14247.7	15688
	Gimap1	19154.3	22291
	Itpr3	5867.33	6946.67
	Map2k6	1248	1083
	Ebp	42764.7	50292
	Myo1f	21463	29828.3
	Nfic;Nfia	179.333	209.333
	Gpr143	61.3333	189
	Pkn1	24085.7	29378.3
	Rad54l	428.333	555.333
	Surf6	13460	13708
	Vamp7	7446.67	8774
	Hdac2	21352.7	23167.7
	Mpp1	11878	13423
	Aup1	11642.7	13468.7
	Pebp1	324388	326560
	Stam	1310.67	1410.67
	Stim1	13575.7	16237.3
	Ctps2	28897.3	31714.7
	Was	86145.7	102222
	Tial1	23113.3	24549.7
	Hnrnph2	28681.3	28478.7
	Rock1	8448.33	9676.33
	Rock2	3105.67	3317.33
	Smad1	652.333	619
	Tank	150.667	159
	Hint1	411719	456470
	Ezh1	23.3333	35.3333
	Nfyc	8545.67	9780
	Ufd1	18898.3	21067.7
	Terf1	2734	3435.33
	Elavl1	267432	287207
	Rad50	13996	15195.7
	Usp9x	11233.3	12145
	Tp53bp1	2189.67	2152.33
	Cux1	134.667	134.333
	Idh3g	41554.3	47623.3
	Galnt3	503.333	864.667
	Rit1	16	35.6667
	Ext2	183	259.667
	Evl	113992	144682
	Slc9a3r1	217684	229269
	Bid	7223.67	8247
	Eif4ebp2	2797	2681
	Stx4	7328	7595.67
	Vasp	154400	189362
	Cxcr4	80.6667	73.3333
	Ldb1	5050.67	5745.67
	Siae	1122.67	1326.67
	Naca	43134.3	49256.7
	Irf3	13670.3	13100.3
	Casp3	140381	159338
	Urod	21572	23987.3
	Ctps1	29959.7	34238.7
	Gaa	3335.33	3655.67
	Polr1b	5151	5465.33
	Atp8a1	33	24.6667
	Cct7	288031	320686
	Cct2	450803	501908
	Cct4	433911	460069
	Cct5	266602	301273
	Cct6a	268781	295457
	Cct3	428499	485300
	Gabpb2	6096.33	6720.33
	Atf1	1669.67	1520.67
	Tgfbi	71.3333	74.6667
	Renbp	3.66667	17.3333
	Stim2	2888.33	3919
	Tnik	4833.33	5788
	Tnfrsf26	1360	1300.67
	Wnk1	6873	7469
	Phf5a	99136.7	112713
	Txnl4a	11723.7	13317
	Rpl36a	267139	296678
	Tubg1	24943.3	29468.7
	Cbx1	36808.7	35321
	Eloc	107438	116833
	Arf1	619482	792805
	Arf5	92214.3	109829
	Erh	195607	203189
	Ap2m1	48375.3	57484.7
	Rhog	156062	168392
	Rpl19	286511	315881
	Serf2	19134.3	17639
	Srsf3	792474	852197
	H3c2	9217293	9268731
	Isoc2a	25936.3	29121.7
	Mcl1	3772.33	4141.33
	Nptn	9509.33	11599.3
	Bach2	286.333	276.333
	Polr1d	13637.3	14931.3
	Nfatc3	1082.33	1282
	Mcm2	202676	217570
	Mcm6	231067	244379
	Prkdc	592	695.667
	Csrp2	228.333	313.333
	Csrp1	91710.7	103585
	Kif20a	8221.67	8938
	Nxn	5634.67	6657
	Pkp1	145.667	72
	Rps3a	1198718	1358728
	S100a13	171212	196621
	Sms	23012.7	25455
	Taf1a	418.333	434.333
	Taf1b	1797	1922.67
	Etv6	983	716
	Sptlc2	11590.3	18767.7
	Sephs2	850	1201
	Ncf4	7837.67	9530
	Atp1b3	131216	156423
	Psme1	761806	902902
	Psme2	525136	631554
	Frg1	58701.7	60887.7
	Cdk2	50547.3	57573
	G3bp2	32370	37582
	G3bp2	742	703.333
	Anxa11	92515.7	111124
	Lig3	4402	5010
	Vps45	5993	6469
	Lyst	419.333	509.667
	Crmp1	54151.3	62143.7
	Anxa4	61077.3	64770.3
	Nbr1	24	25.3333
	Mprip	479.333	562.333
	Slbp	7808.67	7136.33
	Fhl1	803.333	1158.33
	Atp5pf	12471	13319
	Bop1	30029.3	33035.3
	Mylpf	6866.67	6774
	Rps5	581308	659110
	Dok1	6033	5314.67
	Ppp4c	32125.7	36366.7
	Smad4	1828	2375.67
	Tarbp2	2095.67	2433.33
	Aurka	2392.33	2795.33
	Coq7	1579.67	1737
	Eya3	5358.67	6519.67
	Rgs14	10154.3	12477.3
	Txn2	12921.7	14382
	Gclc	5856	6359
	Smarcc1	42424.3	46335.3
	Tep1	34	51.3333
	Cpt1a	3756.33	3925.67
	Polr2c	41120.3	43341.7
	rp9	3009.67	3545
	Wbp2	10568.7	12579.3
	Thumpd3	25694	28079.7
	Cry1	185.333	276.333
	Xrn1	7180.67	8291.67
	Smn1	2049	2542.67
	Fh	110210	119692
	Fxyd5	13250	13040.3
	Pstpip1	47656.7	62095
	Map4k4	1903	2290.67
	Ctsc	26310.3	31792.3
	Anp32e	227779	239055
	Lypla1	61600.3	75092
	Jpt1	100830	115278
	G3bp1	159892	186057
	Slc35b1	865.667	1463
	Casp7	3922	4743.67
	Pex7	1157.67	2574.67
	Rbbp6	2854	2948
	Dtymk	60272.7	64697.3
	Ung	905.333	914.333
	Shc1	9475.33	11218
	Gnpat	4524.33	5320.33
	Atp9b	85	105.333
	Atp8b2	237.333	266.667
	Tubb5	1195396	1357839
	Psmb4	157038	177241
	Rplp2	796589	829373
	Uqcrh	33322	42710.3
	Prdx5	260398	325569
	Tcf7	7171	6570.33
	Gabpb1	33078.7	44468
	Gabpa	24439	27053.7
	Xdh	4741.67	7536.33
	Hmmr	2836.33	3357.67
	F8a1	1109	1249.67
	G6pdx	60901.7	74220
	Apoa1	17484	18390.3
	Itga4	1525.33	1428.67
	Yy1	15359.3	15970.3
	Hnrnpul2	119726	130454
	Creb1	27313.3	28792.3
	Hmgcr	351	585.667
	Top2a	251378	275493
	Sec23a	13156.7	14990
	Notch1	330	560.333
	Rsu1	61667.3	71257.3
	Nme2	2.14017e+06	2.52027e+06
	Vcp	455497	541535
	Ly9	18739.7	21080.7
	Uba1	307170	367176
	Prkcq	29260.3	31049
	Pdcd1	156.667	240
	Ctnnb1	208.667	374.667
	Jup	4628.33	1592
	Sos2	131	151.333
	Mtf2	2174.67	3537
	Sap30bp	23654.3	27001.7
	Nucb1	42433.7	48590.7
	Mark3	1030.33	1042.33
	Cdk7	11477.3	12642.3
	Enah	35	0.1
	Galt	2190	2634.33
	Atp5f1a	1254753	1.34762e+06
	Ikzf1	43306.7	47585
	Runx1	2266	2385.33
	Itk	13168.3	14977
	Pfdn6	63689.7	72702
	Eif2ak2	3335.67	4039.33
	Rela	24189.3	26862.3
	Ckb	2758	3894.33
	Smpd1	546.667	754.333
	Smarcad1	2542.33	2977.67
	Cdk16	21	16.3333
	Top1	46800.3	49832.7
	Mpg	778	734.667
	Relb	573.667	647
	Acp5	24673.3	33456.7
	Rac2	667244	825881
	Rcn1	15992	17482
	Mark2	15163.7	16610.7
	Fabp5	181001	181722
	Adam8	330.333	469.667
	Pc	2610.33	3342.33
	Rnasel	450.667	557
	Larp7	19215	18831.3
	Eif5b	25054.3	27673
	Cab39	44311.3	56500.3
	Ptpn2	18417.3	19693
	Atp5me	363646	386196
	Nr4a2	7.33333	16.3333
	Sh3bp2	177.667	182.333
	Anxa7	58372.3	70385.7
	Igf2r	8909.33	11734.7
	Ect2	806.333	937.667
	Map3k8	156	179
	Serpine2	2970.33	4638
	Acads	61047	65999
	Cd244	2449	2059.33
	Lgals3bp	32716.7	44442.7
	Bax	99216.3	105268
	Plk1	12100	13820.7
	F13b	241.667	333.333
	Cbfb	20351.7	22878.7
	Cbfb	111586	116628
	Cnn2	280965	345428
	Tle3	8955.67	9760
	Tgm3	83	15.3333
	Lyar	26007	27147.7
	Rad51	7120.67	8254.67
	Zbtb14	371	448
	Pecam1	824.667	927.667
	Eps8	340.667	351
	Tfdp1	7878	8515.67
	Padi2	17120	26730.7
	Runx2	9225	10334
	Fbln1	1161.67	1322.33
	Ssrp1	112987	117973
	Ncf1	3378.33	4031.67
	Slc7a1	7364.33	9048
	B4galnt1	42042.3	54881.3
	Gcnt1	276	249
	Chd8	3039	3390.33
	Inf2	1389.67	1465.33
	Ubxn2b	119	157.333
	Zc3h18	11012.3	10615.3
	Zc3h18	517.333	304.667
	Mcm10	301	326
	Rbm15	11618.7	12235.7
	Znf800	1964	2203
	Cep76	344.667	372.667
	Rbis	802.667	842
	Ppp4r2	20236	22799.3
	Rtel1	144.667	178.667
	Tanc1	799.667	984.667
	Npepps	28837	32564.3
[truncated: 4,933 more rows]

## Sheet: 2I
	Estimated protein copies per cell
		WT			Pim dKO
	Drp1 (Dnm1l)	48909	45029	43954	34544	43391	40067
	Opa1	8576	8701	8146	7822	8117	7871
	Cpt1a	3804	4197	3776	4023	3486	3760

## Sheet: 2J
		IL15 dKO copies ave	IL15 WT copies ave	IL15 WT copies ave - mitochondrial proteins		note: to allow visualisation of proteins with copy number "0" in one condition on a log scale these values have been imputed as 0.1 for plotting purposes only
	Srcap	984	1138.33
	Tns1;Tns1;Tns1;Tns1;Tns1;Tns1;Tns3;Tns3;Tns2;Tns2;Tns2;Tns2;Tns1	40.3333	44.3333
	Tent5a	102.333	157.333
	Larp1b	608.333	625.333
	Pfkfb3	2719.33	3312.67
	Gbp6	22124.3	32011
	Tsc22d2	49.3333	47.3333
	Crybg1	2930.67	3683.33
	N4bp2	314.667	359.333
	Plekha5	376	368.333
	Fahd2a	2030.67	2045.33
	Lcmt1	8162.67	10391.3
	Bptf	117	124.667
	Slc9a6	131.667	138.667
	Ttc13	215	264.667
	Dcaf4	62	53.6667
	Kidins220	836.333	932.333
	Kif13b	2593	3571.67
	Trappc8	3913.67	4196.33
	Taf4	2357.67	2427.33
	Dgkh	6	424.333
	Nt5dc2	830.333	745.333
	Kctd17	288	260.333
	Osbpl7	992.667	1113
	Ptar1	4631.33	5749
	Rapgef1	1520.33	1563
	Chd3	64	61.3333
	Tbc1d25	580	1050.33
	Cul4b	12822.7	14621.3
	Zmynd8	3117	3422.67
	Dhx8	6655	7708.67
	Pgap3	549.333	686.333
	Arfgef2	2070	2505.67
	Bptf	1580.67	1734.67
	Gpatch8	1098	1136.33
	Fam104a	703.333	701
	Cdc27	2903.33	3307.33
	Cdc27	57.6667	81.3333
	Zmym4	225.333	330
	Prdm2	215.333	242.333
	Rlf	41.6667	49.3333
	Zmym1	83.6667	106.333
	Tmem201	570.667	682.333
	Osbpl9	103.667	128.333
	Osbpl9	3202.67	4047.67
	Szt2	3.33333	4.66667
	Mettl23	1229.33	1579.33
	Arhgap27	4325.33	4497.67
	Med14	1946.67	2356.33
	Faap100	274.667	306.333
	Dhx35	1975	2374.33
	Pusl1	2764.33	2945.67
	Ddi2	18740.3	20428
	Slc25a53	3167	3206.67
	Dock11	16550	16786
	Mtg2	5001	4613
	Maged2	118.667	187.333
	Bclaf3	84.3333	80
	Med12	1232.33	1599
	Ryr3	17.3333	21
	Ckap5	28224.7	31258.7
	Ambra1	483.333	450.667
	Brwd3	1.33333	0.333333
	Ndor1	98.3333	81.6667
	Tprn	713	725
	Ndufaf6	629.333	598
	Virma	4450	5133.33
	Man1b1	513.333	511
	Fubp3	9315.67	15031.7
	Map7d1	5453.33	6464.33
	Chd7	1885.33	1652
	Dpy19l4	1139.33	1397
	Pnisr	770.667	1789
	Dcaf10	9.33333	9.33333
	Focad	2387	1945
	Setx	895	1189.33
	Cntrl	2034.67	2268
	Ptpn3	407.333	267
	Shoc1	68	105.333
	Mllt3	394.667	416.333
	Ubr4	6236.33	7707
	Atp8b4	13868.3	16163
	Mdn1	3989.33	4111.33
	Tpx2	15385.3	16018.3
	Ndufaf5	1146	1327.33
	Tubb1	9312.33	11829
	Rtf1	12243.7	13494
	Ppig	8674.33	10098.7
	Itpripl1	110	162
	Ttn	79.6667	77.3333
	Upf2	3985.33	4167.33
	Klhl41	16052.7	12567.7
	Cep152	463	501.333
	Rabgap1	2788.33	3275.33
	Mga	129.333	160
	Atxn7l3	583	634
	Mocs3	73545.3	70230.3
	Las1l	15357	16748.3
	Arid1a	32.3333	38
	Arid1a	47415.7	61496
	Arid4b	251.333	290
	Uhrf1bp1l	206.333	276.333
	Tyw5	1623	1801.33
	Arfip1	17335.3	19650
	Kansl3	1647.33	1798.33
	Trmt1l	7812.33	9112.67
	Dennd3	64.6667	29.6667
	Rsrc2	1791.67	1781.67
	Tbc1d8b	326.667	417.667
	Plcb2	148.667	164
	Ralgapa2	109.333	111.333
	Odf2	570.667	605.667
	Cercam	18	30.6667
	Ttc38	9231	9732.67
	Mtr	479.333	577.333
	Mipep	2757.67	3796.67
	Phrf1	4073.33	2899.33
	Armt1	5408.67	5955
	Rabgap1l	1067.33	1050.33
	Rabgap1l	1223.33	1383
	Dennd4c	3906.33	4833.33
	Wdr76	8963	9383.33
	Dpy19l1	6195.33	7265.67
	Thada	2805	3060
	Sec14l1	30	29.6667
	Usp36	1213.33	1386.33
	Mllt6	1523.67	1102.67
	Cisd3	2541.33	2463
	Chd3	12917.7	14642
	Slfn9	2156	2807.33
	Slc16a6	149.667	230.333
	Eif2b3	26103.3	30305.3
	Mms22l	300	360
	Kif16b	23.6667	42.6667
	Uprt	3507	4179
	Zcchc7	82.3333	82.6667
	Akirin2	288.667	452.333
	Nfx1	460	440.667
	Usp24	4539.33	4966
	Tmem245	526	644.667
	Thoc2	9867.67	11175.3
	Dlgap4	1462	1526.33
	Zbed5;Chchd2	9565.67	9633
	Cad	95362	105516
	Arhgap42	1171.67	1082.67
	Phf3	1369	1367.67
	Ythdc2	1476.33	1644.67
	Brpf1	291.333	339.333
	Otud4	5494.33	6056.67
	Cpb1;Cpa1	784	1227.67
	Rrn3	340.333	421.667
	Zfc3h1	324.333	357.667
	Rapgef6	11684.3	8285
	Unc13d	16997	20912
	Otud7b	700.333	793.667
	Ep300	618.333	751.667
	Tagap	447.333	370
	Tut4	2786.33	3037
	Trappc11	3652.33	4481
	Itpkb	1534.67	1184.67
	Polr3a	2969	3260.33
	Ppfia1	2725	3225.33
	Ankrd44	40519.7	50991
	Scaper	39	42.6667
	Dock5	691.667	913.667
	Rbm25	25421.7	27064
	Xpnpep3	2275	2605.67
	Tatdn2	134.667	146
	Qtrt2	6943.33	8359
	Nup205	25077.7	30593.7
	Pdzd8	1319	1567
	Osbpl8	6713.67	6895.67
	Dnaaf5	4201	4787
	Tmf1	334	397.333
	Arxes1;Arxes2	707	674
	Mfap1a;Mfap1b	15059.3	16610
	Rnaset2a;Rnaset2b	14862.7	22143.7
	Nlrc5	2929.33	4211.67
	Mndal	39217.7	42963.3
	Nkapd1	1097.67	1074
	Tada2b	1345	1087
	Rexo5	76.6667	131.333
	Hnrnph3	10525	14618.7
	Samd1	1622.33	1725
	Safb	16052.7	16212.3
	Lrr1	1025	1445.67
	Ccdc6	6824.33	7003
	Tmed7	24048.3	28193.3
	Rsbn1l	1987.67	2186.67
	Ddx23	27806.7	28854.3
	Tmppe	1374	1519
	Ino80e	1454.67	1242.67
	Pigg	122.333	126
	Ptrhd1	5595.33	6072.67
	Bin2	116979	119300
	Gls	39857	41992.7
	Gls	7765.33	7870
	Mroh1	393.667	528.667
	Piezo1	24.3333	30
	Dgkd	15.6667	16.6667
	Ankhd1	4010.67	5414
	Talpid3	16.3333	16
	Trim5	4037.67	5047
	Gcn1	21446	24793.7
	Ttc17	12.3333	22.3333
	Mki67	89148	88113.3
	Golgb1	508.333	680.667
	Ncapg	48182	57702
	Card6	28.3333	49
	Zc3h7a	1438.33	1890
	Rsf1	4070.33	4239
	Rpl3l	5946.67	5789
	Adap1	5992.33	6676.33
	Erich1	1114	1184.33
	Ahnak2	21.3333	25.6667
	Fam98c	3499	3441
	Rasa1	8375.33	9572
	Setd1a	1670.33	1835.67
	Parp4	919.667	1357.33
	Prr12	899.333	1057
	Fbxl18	295.333	357.333
	Ascc3	2075	2564.67
	Chd2	1115.67	1284.33
	Scaf11	2353	2497
	Herc1	128.667	153
	Ermard	23	24
	Fcgbp	11137.7	3794
	Tex264	3411	4641.33
	Atad2b	4791	5280.67
	Irf2bp2	46040	169632
	Abcc4	199	226.333
	Hectd4	16.6667	19
	Mideas	2193.33	2411.33
	Tarbp1	1324.67	1417.33
	Akap13	6173.33	6608.67
	Nup153	16247.7	15948.3
	Pi4ka	9676.67	10861.7
	Cracdl	447	420
	Cenpf	288.333	323
	Zbtb21	41.3333	44.6667
	Nbas	1367	1669
	Apob	202.333	244
	Ankrd11	177.667	202
	Arid1b	823.333	867.333
	Cep192	693	775.667
	Trip11	1731.67	1896
	Rnf213	3053.67	4023
	Dsp	1822.67	949.333
	Slc4a1ap	30180.3	32859.3
	Nolc1	47436	48566.7
	Setd2	286.667	302.333
	Kif23	4726.67	5302.67
	Ythdc1	3040.67	3115.67
	Cfap44	560.667	613
	Nlrp12	661	1114.67
	Ahnak	89995	108466
	Myo1e	8294	11092
	Ccdc85c	273	256.333
	Srsf11	14775	16882
	Bod1l	1753	2085.33
	Utrn	3778.33	3852.33
	Pfdn4	28919.3	33361.3
	Ube4a	2603.33	3074.33
	Akap11	146	185
	Zc3h13	1083.33	1160.67
	Arid2	2192	3153.67
	Rnf169	738.667	758
	Numa1	51591.3	53226
	Urb2	4371.33	4499.67
	Dnajc21	1674.67	1877.67
	Nfxl1	109.333	173.333
	Fry	10.3333	16.3333
	Dennd4a	2870	3297
	Rap1gds1	18323.7	20824.3
	R3hdm1	416	454.667
	Btaf1	4488	5343
	Helz2	2504.67	3295
	Sec16a	1664	2543
	Raph1	1665.67	1984
	Usp32	9.33333	14.6667
	Tpr	26502.3	26461
	Morc3	9625.67	10971.3
	Dot1l	3.66667	7.66667
	Rfx7	94.3333	105.667
	Ttc37	5991	6506
	Agl	178	205
	Zc3h7b	1951	2426
	Arid4a	1916.67	2020.67
	Farp1	98.3333	139
	Usp9y	1783.67	2039
	Bicra	125.667	124
	Fryl	6024.33	7285.33
	Iqgap3	4072.33	5124.33
	Srp72	43700.7	54229.7
	Ccdc28a	112	93.3333
	Cabin1	27.3333	32.3333
	Dhx16	11806	13600.3
	Dnajc13	9250	11061
	Sec24c	26007	31462.3
	Gimap9	85920.7	92852.3
	Heatr1	16826.3	18393.7
	Arfgef1	4073.67	5175
	Kbtbd2	956.667	988.667
	Pcf11	2053.67	2250.33
	Nsmce4a	6111.33	7309.33
	Lrrc32	63.3333	58.3333
	Atp2b1	16072.3	16940
	Trip12	11621.7	14772
	Akr1b10	10701.7	8808.67
	Poglut3	164.667	227
	Zbtb11	634.667	661
	Tubgcp6	178	181.667
	Brd1	1038	1119
	Arfip1	2096.33	2216
	Aamp	4071	4636.33
	Kif14	904.667	1018.67
	Hk2	26736.3	31455.3
	Capn2	42032.7	60011.3
	Bin1	53332.3	60492.7
	Sec22b	79445	90004.7
	Kmt2b	173.667	193.333
	Dpysl2	294590	343893
	Lgals9	13193	15745.7
	Eya2	70.6667	104
	Emd	48767.7	52369.7
	Esrra	203.667	217
	Gtpbp1	37170.7	39727.3
	Alyref	218758	205056
	Clta	48284.7	58093
	Pten	1061.33	1160.67
	Endog	5847	7737.33
	Mknk1	470.333	577
	Mlx	755.333	683.333
	Myh11	9287.33	11576.7
	Map3k4	781.667	656.667
	Metap2	224606	277247
	Bcl7c	9860.67	10042.7
	Prdx6	467968	465387
	Akap1	823.333	824.667
	Bak1	37265.3	48290.3
	Casp6	3181	4066.67
	Polr2j	11042.3	8845
	Dld	81439.3	85665
	Nfil3	1127.33	1392.33
	Hsd17b10	83413.7	86599
	Ube3a	15420	16534.7
	Ogg1	888.667	898
	Tcof1	26488.3	25168
	Dctn1	224530	133710
	Mnt	298.333	287.333
	Prkcsh	50539.7	56110.3
	Serpinb9	55347.7	73977.7
	Prdx4	29253.3	29429.7
	Diaph1	53485.3	66476
	Eftud2	132302	144639
	Ercc2	2075	2151.67
	Galnt4	77.3333	83
	RO60	111	138
	Ell	4321.67	4916
	Ikzf3	23964.3	24924.3
	Bub1	485.667	490.333
	Galnt1	5933	6910.67
	Faah	8607	10103.7
	Aip	108888	126318
	Flot1	10962.7	12796.3
	Sdcbp	8338.67	9189.67
	Atox1	104419	126668
	Ncoa3	1692.33	1834
	Degs1	9679.67	13103.3
	Lfng	964	1394.67
	Pex5	876.667	1027
	Snap23	14257	26050.3
	Wrn	64.6667	86.3333
	Psmb1	338464	389035
	Hdac1	112213	125935
	Map2k3	12205.7	15004
	Ndufb11	54028.7	57368.7
	Sypl1	1900.33	2184.33
	Sema4d	20788.3	23620.7
	Nfatc2ip	7952	8141
	Gsto1	100789	103589
	Man2b1	10399.7	11734.7
	Rpl21	436476	498110
	Gclm	52858.7	58051.3
	Psmc3ip	576.667	682.667
	Vps26c	8502.67	9437.67
	Agpat1	3142.33	3366.33
	Map3k5	202	219.333
	Scarb2	5550.33	7340
	Atn1	88.6667	83.6667
	Phb2	360250	391730
	Emg1	58798.3	64084.7
	Polr1a	7200.67	7769.67
	ATP5IF1	134235	139598
	Terf2	5029.67	4869.33
	Bet1l	473.333	620.667
	Gosr2	6896.33	8001.33
	Nedd9	4861.33	6770.33
	Bhlhe40	1332.67	1117
	Gzmk	511	736.333
	Cdk2ap1	5991.33	6503.67
	Ddt	220419	256254
	Cenpa	10926.3	11093.3
	Cpsf2	21558	23968.7
	Psmd4	78504.7	89428.7
	Psmd4	4367.33	4278.33
	Tnfsf11	10.6667	16
	Ptpn9	6921.33	8001
	Nsmaf	3149.67	3793.33
	Exoc7	4939.67	5726.67
	E2f3	783.667	882.333
	Chek1	3576.67	3743
	Batf	1545.67	1626.33
	Dhx15	126795	137798
	Purb	38856.3	40644.7
	Nmi	48310.3	55856.7
	Slc6a6	494	723.667
	Srsf5	80038	89204.3
	Kpna4	56435	64696
	Kpna3	23968	27896
	Kpna6	19213.7	23711.7
	Capn1	77441.3	93751
	Ifi203	14576	15124
	Cnih1	361.667	676.667
	Abcc1	1152.33	1276
	Anp32a	517902	525529
	Exoc4	11178.7	11521.7
	Phyh	119.333	165.667
	Hax1	397.333	416
	Pld3	23752.3	32617.7
	Crcp	920.667	1085.33
	Dhodh	7744.67	8427.67
	Rnf5	535	547.667
	Atf6b	23	15.3333
	Ech1	10150	12888.3
	Fkbp8	36083.7	42491.7
	Fkbp8	1800.33	2197.33
	C1d	1400.33	1435
	Clk3	3535.67	3930.67
	Notch2	383.667	448.333
	Rabep1	2349.67	2631.67
	Psmd14	90554.7	103944
	Adam10	7076.67	7880
	Abca4	32	37
	Fyb1	24430.7	29082.7
	Npc1	4389	5096.33
	Scamp3	18218	21836.3
	Daxx	3551.67	4046.33
	Zfpm1	1179.67	1041.33
	Mdm4	44.6667	41.3333
	Pmm1	1598	1749
	Bet1	5686.67	6789
	Stag2	15714	17831.3
	Ap1b1	61269	73038.7
	Cetn3	5564.67	6330.33
	Pold2	30748.3	32525.3
	C1qbp	107799	111816
	Ifnar2	19456.3	26996.3
	Itgb1bp1	2615.33	2769.33
	Adam19	629	850
	Mrps12	605.333	553.333
	Myadm	206.333	308
	Ndufa1	18403	21212
	Nudc	136446	148348
	Phox2b	2453	2687.33
	Pnn	20807.3	25003.7
	Sptlc1	9632.33	10136.7
	Tnfrsf18	7234	7865.67
	Socs1	3.66667	15
	Socs2	495	340
	Ring1	10567	11142.3
	Hnrnph1	478800	490819
	Api5	118435	124475
	Bcat2	24817.7	29833.3
	Timm44	22544.7	24135
	Cops5	35086.7	37601.3
	Slc1a4	63.6667	48.3333
	Calu	49585.3	54681.3
	Sp100	79024	89703
	Lsm2	191473	200652
	Pik3cd	47530	29520.3
	Emp3	2729.33	3517.33
	Ctnnd2;Ctnnd2;Pkp4;Pkp4	19	21.3333
	Fxn	4838.67	4916.33
	Pitpnm1	3434.67	3264.33
	Psmb10	142762	166147
	Rab33b	335.667	373.333
	Mrpl23	22479.3	23788.7
	Zw10	13866.3	15999
	Klrd1	4366	4787.67
	Klrk1	688	896.333
	Ddost	125922	160574
	Ap3d1	11153	13759.3
	Srpk2	7760.67	8465.67
	Man2b2	8836	11730
	Dapk3	1625.67	1601
	Limk2	3215.33	3566.67
	Dffa	5343.33	6254.33
	Dffb	1323.33	1428.33
	Mafg	1928.67	1582.33
	Il16	49574.7	58006
	Bysl	28026.7	30442.7
	Mllt10	144.333	138.667
	Atp10a	261.333	396.333
	Csnk2a2	20552	22625
	Zmat3	1114.67	936.667
	Eomes	7544.67	21596
	Suv39h1	10241.3	10672.3
	Hmgb3	388700	469509
	Itgb3	2782.67	3067
	Nfkbie	263.667	282.333
	Reps1	4253.67	4547
	Bcl2l11	12602	13531
	Bnip2	1938	2849.33
	Smarce1	27855	29170
	Dnajb6	18920.7	21492.3
	Prkag1	20636.3	24049.7
	Pole2	5059	5718.33
	Lat	16199.3	17252
	Banf1	86993	91555
	Rnf13	3092.67	3464.33
	Tnk2	73	111
	Get3	35204.3	42864
	Slk	16573	18218.7
	Bnip3	5646.33	17871.7
	Trappc3	15644.3	17744
	Pgrmc1	37806.3	46472
	Impa1	112747	133474
	Bckdk	3107	3370.33
	Copb2	64590	75504.7
	Nck2	282.667	366.333
	Tlk2	126	120.333
	Tlk2	1712	1686.33
	Trdmt1	315.333	379
	Pde6d	5599.67	5881.33
	Tpmt	334	549
	Ptpn20	12236	14221.7
	Impact	348	687.333
	Stk10	39103.3	42512.7
	Syngr2	4901.67	6296.67
	Bloc1s1	4312	4747
	Strn	25862	27254.3
	Nipsnap1	12214.7	13548
	Nipsnap2	7307	7609.33
	Sap18	85411.7	89777
	Septin7	179759	195057
	Eif6	188135	232365
	Rpl35a	783351	851091
	Atp2a2	35411	40793.3
	Cbx4	3884.33	4175.67
	Supt5h	40175.7	43200
	Ilk	50740.7	62998
	Chkb	273.667	379
	Rad51d	42.6667	73.3333
	Psmb5	5417.67	5545.33
	Rngtt	9335.33	10607
	Rdh5	44	35
	Sigmar1	16557	17267.7
	Aurkb	47081.7	52093.7
	Dhx9	133674	147217
	Dhx9	1533	1455.33
	Dpm1	37181.7	42891
	Top3a	179.667	190
	Pip5k1c	140.667	266.667
	Pip4k2a	8785.33	10458
	Eif3d	95459.7	106903
	Birc5	14088	11129
	Znf143	1835.67	1814.33
	Eef1b	285194	339969
	Hmox2	40390.3	47539.7
	Ptp4a2	10645	13294.3
	Ess2	1705	1794.67
	Grk6	21443.3	23803.3
	Atxn2	553	523.667
	Nmt1	32427.3	38172
	Nmt2	12929.7	15310
	Epb41l2	12544	12787.7
	Gpx4	48749	58702.7
	Cript	10995.3	12292.7
	Rnaseh1	2464.33	2673.33
	Dxo	415	411
	Ctss	16811.7	18812
	Emc8	21704	25333
	Pdlim1	161743	184578
	Vamp8	22087	22323
	Gtf2h4	2932.33	2977
	Fhl2	4136.67	6221
	Psma3	242432	265050
	Stx7	6595.67	6331.33
	Bard1	81.3333	86.6667
	Sfn	2222.33	4300.67
	Dok2	30506	39804.7
	Tmem131	119.667	109.667
	Ugdh	3609.33	3991
	Pknox1	1	13
	Vamp4	5931.67	9159.33
	Ubr1	1833.67	1975.67
	Snx3	80265	91568
	Snx12	34682	38289
	Sp3	1310	1404.67
	Hsd17b12	72651.3	86925.7
	Kdm6a	482.667	495
	Srpk1	18333	20544.7
	Diaph2	613.333	573.333
	Smpd2	3976.67	3239.67
	Stag3	421.667	497.667
	Slc25a17	5627.67	7313.67
	Dtnb	128.667	161.667
	Cask	994.333	1169.67
	Pfdn2	117451	131506
	Cfdp1	21666.3	21496.7
	Wiz	2520	2444.33
	Znf326	4686.33	4399.33
	Sorl1	1244	1751
	Naglu	7950.67	9044.33
	Wdr1	388572	458353
	Ikbkb	13198.3	15005.7
	Baz1a	6543.33	7856.33
	Vti1b	19527.7	21255.7
	Grpel2	209	237.333
	Cxcr3	2614.33	3356
	Mtx2	8315.33	9091.67
	Klc1	8878.33	10567.7
	Klc2	1213.33	1265.33
	Dhcr7	7200.67	8950
	Capns1	93742	113775
	Znf106	30	39.3333
	Dync1i2	19205.7	21122
	Nsd1	191.667	233.333
	Dnmt3a	4835	5369.33
	Dnmt3b	147.333	157.333
	Ap1g2	26885.7	31189
	Gmnn	2579.33	2979.67
	Shoc2	3801	3496
	Ikbkg	6777.67	7849
	Ppt1	12651	13639.3
	Zfr	7963.33	8121.33
	Cops3	31884	34865.7
	Cops4	41535.7	43830.7
	Cops6	26839.7	30403.7
	Parp2	7636.67	8554.67
	Men1	3077.33	3158
	Hnrnpa2b1	5937	6788
	Hnrnpa2b1	1883878	1.95543e+06
	Aff1	5.33333	8.66667
	Sap30	4431.33	5049.67
	Comt	16833.7	18343.7
	Pglyrp1	891.667	964.333
	Becn1	2025	2751.33
	Parg	4990.33	6603
	Slc28a2	1917.67	2362.33
	Gosr1	5197.33	6076.33
	Lamtor3	29512.3	33752.3
	Brd7	2065.67	2201.67
	Rrad	771.333	1161.33
	Creg1	3094.33	3974.33
	Dgka	19242.3	22965.3
	Psmc3	145420	165418
	Ugcg	2286.67	3056
	Clpp	12537.7	13127.7
	Stk16	262.667	414.667
	Blm	98.3333	94.6667
	Orc4	4173	4299.33
	Ctbp1	30424	33076.7
	Hsd17b7	4697.33	5849.33
	Birc6	4755	5728.33
	Tom1	2439.33	2917.33
	F5	2326.33	2845
	Rpp30	24810.7	26660
	Stam2	3833	4317.33
	Sc5d	107.667	70.3333
	Jtb	1666	1978.67
	Fgd3	8267.33	8970.33
	Cradd	3465.33	3414.67
	Idh1	4993.67	6815.67
	Akap10	1229.67	1679.33
	Arl6	580.333	662.333
	Tspyl1	372	538
	Ltb4r	28.6667	8.33333
	Tpst2	784.333	958.667
	Ccnk	5221.33	6039.67
	Cd160	2500	3410
	Zfand5	2325	2561.67
	Apaf1	8769	11040.3
	Sh2d1a	102827	110268
	Hdac3	6652.33	7995
	Pias1	2830.67	3160.33
	Soat2	563.333	275.333
	Zbtb7a	2622.67	3403.67
	Nfatc1	8848.67	10412
	Lin7c	10484.7	10250.3
	Gnpda1	45026	56298.7
	Yme1l1	12211	13632.3
	Setdb1	920	1125.33
	Stx8	9910.67	12561.7
	Gcat	12479.3	17672.3
	Actn3	1451.67	2851
	Leprot	192	246.333
	Tpp1	4767	4782
	Mkln1	2923.67	3978.33
	Itm2b	7316.67	9352.33
	Coro1a	2.40183e+06	2.66618e+06
	Cope	45444.3	51934
	Rbm3	559656	653177
	Sp1	2822.67	2833.33
	Cst7	7090	7546
	Grap2	163680	203173
	Kcnn4	679	900.667
	Casp8	52915.7	62304
	Lancl1	14523.7	14480
	Ier5	68.6667	91.3333
	Vti1a	3926.33	4553.33
	Mt-Cyb	1650.33	2202
	Dhfr	168514	188859
	Mtco1;mt-Co1	5034	6385.67
	Mtco2;mt-Co2	279940	332508
	mt-Co3	1402	1375
	Hprt1	411480	496660
	Mtatp6	758.667	1248.67
	Odc1	53	153
	Ca2	3365.67	3918.67
	C3	6445	6979.67
	C4b	353.333	489.667
	Fos	150.333	64.6667
	Myc	63.3333	23.6667
	Ins1	0.1	93.6667
	Ifng	356.333	676.333
	Il2ra	2030.33	1552.67
	Cd8a	42237.3	48140.3
	Thy1	2.11091e+06	2452766
	Tcra	23824.3	28793.3
		70685.3	86497
	B2m	178656	251387
	H2-D1	331311	404026
	H2-K1	319958	410907
	H2-K1	351.333	422.667
	H2-Aa;H2-Aa;H2-Aa;H2-Aa;H2-Aa;H2-Aa;H2-Aa;	216.333	127
	H2-Ab1	167	286.333
	Hba	888726	1.03393e+06
	Hbb-b1;Hbb-b2	461256	634140
	H3-5;H3-3a	37689	123551
	Col4a1	169	187.333
	Lamc1	21	19
	Mt2	5834.33	7997
	Mt1	4466.67	6205.67
	Mtnd1	9599.67	18303.7
	Mtnd2;mt-Nd2	1928	2382
	Mtnd3	3080.33	2403.67
	Mtnd4;mt-Nd4	3384.67	4028.33
	Mtnd5;mt-Nd5	1580.67	2307.33
	Mtatp8;mt-Atp8	51213.7	53825
	Ada	22780.3	30042.7
	Iap	8501.33	10349
	Gfap	541	646.667
	Tk1	41830.3	48289
	Gzmb	1.20318e+06	1783219
	Tgfb1	6181	6530.67
		9122	11668.7
		162.333	218
	H2-K1	2347	4111.67
	Cd3d	51806.3	58029.7
	Mbp	3370	3833.33
	Araf	7499.33	8001
	Prnp	1260	1286.33
	Aldoc	79772	109348
	Aldoa	2.0224e+06	2.57255e+06
	Prkaca	6644	7939.33
	Got1	75848	81061.3
	Got2	423880	478001
	Ly6a	10349	19303.7
	Jun	298.333	442.333
	Myl1	284	136.333
	Ldha	3.06129e+06	3.57257e+06
	Lck	129010	143498
	H2-T23	4405.33	5591
	Nr3c1	4800	5687.67
	Gpi	390133	477545
	Abcb1b	1988.33	2144.67
	Ptprc	339637	384576
	Pim1	9055.67	9120
	Tnf	8226.67	12318.3
	Myb	769	815.333
	S100a4	384773	634323
	Anxa2	1.07081e+06	1.36318e+06
	Tyms	41428.7	52937
	Alb	57419.7	58491
	Rrm1	128547	152366
	Hsp90aa1	538012	627653
	Ercc1	1617.67	1509.33
	Pdia4	108420	125257
	Aprt	165605	197522
	Zfp2;Znf182	35.6667	26
	Egr1	65.3333	39.6667
	Hsp90b1	412216	513220
	Egr2	18.3333	16.3333
	S100a10	199152	234051
	Sod1	822057	843851
	Mdh2	1.19062e+06	1349885
	Camk4	18697.3	22118.3
	Nras	67787	79041
	Gnai2	302025	344112
	Polr2a	19370.7	21275.3
	Gzmc	5445.33	8158
	Gzmf	323	412.667
	Gzme	3486.67	6198
	Cd2	41952.3	48632.7
	Pgk2	2793	3204.67
	Itgb1	17234.3	19790
	Lif	9159	18658
	P4hb	275591	344112
	Lta	61.3333	149.667
	Ncl	1.16116e+06	1.20031e+06
	Pgk1	2.34906e+06	2606038
	Junb	1293.33	1449.33
	Fth1	29973	36978.7
	Hmgn2	270481	235165
	Sod2	46553.7	48849
	Ctla4	1631.67	1722
	Cdh1	1440.33	600.333
	Surf1	6688.33	7268.67
	Surf2	5605.33	5759
	Chmp6	5096.67	5754
	H2az1;H2az2	844377	819495
	Psmg4	11650.3	12038.7
		4221	6589
	Tagap1	228	220.333
	Derpc	4301	4862.33
	Chtf8	5482	5134
	Ubb;Ubc	235.667	299.667
	Ly6c2	52057.3	65941.3
	Pet100	1114.33	1410
	Pet117	1851.67	1708.67
	Ndufb1	14741	18794.7
	Tmem254a;Tmem254b;Tmem254c	14348	17637.7
	Ifi204	153.667	607.333
	Calm1;Calm2;Calm3	134403	147416
	Eef1akmt4-Ece2;Eef1akmt4-Ece2;Eef1akmt4	577.667	726.333
	Anxa1	20464	34496.3
	Eef1a1	5.04004e+06	5787587
	Ccl1	6204.67	4419.33
	Cd8b	150333	164885
		2281.67	2398.33
	Bcl2	27578	29604.7
	Alad	22233.7	33290.3
	Ctsb	24169.3	31101.7
	Eif4a2	12457.3	13573.3
	Txn	1.79556e+06	2.02557e+06
	Gstm1;Gstm2;Gstm7;Gstm4	230.333	223.333
	Tcea1	89762.3	95688.7
	Prf1	1424.67	2675.33
	Rras	12489	14317
	Slc3a2	57392.3	58978
	H2bc7	6.83092e+07	69028152
	H2bc14	3197.67	4644.67
	H1-0	14847	15956
	Spp1	437.667	173.667
	Sub1	946192	1.06387e+06
	Gzma	334404	618261
	Gzmd	2857	1056.33
	Col1a1	148.667	148.333
	Parp1	32833.3	28068.7
	Lpl	26.6667	55
	Rrm2	69719.3	81371.3
	Fn1	14924	15102
	Gpx1	77939	84624
	Lamp1	13190.3	15794.3
	Cdk1	237606	262456
	Hsp90ab1	2.17927e+06	2.38526e+06
	Cd1d1	439.333	493
	Cfp	7.66667	7.66667
	Itgb2	147017	181319
	Itpr1	221.667	292.667
	Nudt19	977	1206
	Cd3g	85643.3	103060
	Tcp1	1171.33	987
	Tcp1	352203	391874
	Gusb	16703	18271.7
	Prkar2a	12973.7	15391
	Pfkl	37066.7	43616
	Ctla2a	5081.33	6958
	Cox5a	62571.3	68407
	Fgl2	1845.33	3083.33
	Nr4a1	139.667	62.6667
	Pdcd6	76924	88351
	Rpl7a	981145	1.06472e+06
	Scd2	4224.67	4828.67
	Gsn	23185.7	31740
	Cd5	9812	12885.7
	Rb1	3254.33	3607
	Umps	100626	113283
	Icam1	9652.67	11632.3
	Srgn	1037	1417.67
	Msh3	870	896.333
	Slc4a2	234	212
	Dnmt1	93378.3	102902
	S100a6	249682	392225
	Ccl4	1150.67	1309
	Rpl27a	855463	978436
	Rps16	1.7186e+06	1988290
	Rpl7	998415	1.09575e+06
	Mdh1	603385	618438
	Rpsa	1230616	1409539
	Calr	532998	600392
	Fgr	692	906.667
	H2-D1	1323.67	1536.67
	H2-D1	21319.7	28233.3
	H2-Q7	69299.7	95444.7
	H2-Q8	7114	8828
	Srp54	42829.7	51145.3
	Psmd3	132054	152428
	Lmnb1	726016	695620
	Anxa6	1.51581e+06	1767007
	Rplp0	860371	983720
	Hmox1	951	978
	Jund	5830.33	5339
	Glul	2496	2957.33
	Ifngr1	9200.33	13139.3
	Rel	8828.33	9267.67
	Irf1	179.333	251.333
	Cd44	8366	10331.3
	Nme1	555276	690672
	Trim30a	148.667	186.667
	B4galt1	3407.33	4954.33
	Spn	91661.3	100516
	Tcf3	655.333	750.333
	H1-2	2.74494e+06	2495574
	Atp6v0a2	3753.67	4350.33
	Lgals1	4029927	5.5643e+06
	Lgals3	251332	303746
	Ldhb	3880	4488
	Srp14	62145	73007.3
	Il2rb	3451.33	3832
	Cnp	52302.3	63057.7
	Mmut	29786.7	26994
	Il4r	1622.67	2111.33
	Ass1	78111	115591
	Sptan1	77706.7	91520.3
	Hspa1l	43979.3	50117.3
	Ctsa	10613	13789.3
	Gapdh	8.45493e+06	9.94775e+06
	Atf2	900.333	1042
	Zfx;Zfa	909	797
	Lamp2	12360.3	14627.3
	Hmga1	32063.3	21380.7
	Hmga1	28649.3	16319
	Hspa2	40646.3	54871.3
	Eno1	5467093	6045459
	Eno2	779603	936067
	Ptbp1	388732	411261
	Ap2a1	31624.7	37602.7
	Ap2a2	18588.3	22046.7
	Gba	6556.33	8092.33
	Selenbp1;Selenbp2	713.667	709.667
	Cox7c	35691.3	37915
	Hk1	87992	105096
	Ppia	9.61948e+06	1.14102e+07
	Tpi1	1380512	1.55637e+06
	Slc2a1	5777.67	8137
	Hspa1b;Hspa1a	1706	3163.67
	Lyz1	4005	686.667
	Pcna	1359181	1.52935e+06
	Ptpra	2888	3357.33
	Mthfd2	34583.7	40263
	Cd48	116332	133525
	Ctsd	213768	261394
	Sell	4440.33	3000.67
	Bsg	21407.7	21643.7
	Hmgn1	7791.67	5908.33
	Rps6ka1	20790.3	28355.7
	Rps6ka3	67490	77839
	Cfl1	6.92653e+06	7830304
	Il10	291	483.667
	Ar	7.66667	9
	Fasn	121482	181900
	Gstp1	354264	397857
	Ifrd1	832.667	847.667
	F2	12473.3	17360.7
	Nefh	848.667	1093.33
	Rpl13a	771043	833935
	Mpv17	639.333	754.333
	Nelfe	10571	10662.7
	Cox5b	130271	130149
	Cox4i1	438330	476675
	Lsp1	514968	551399
	Hspa5	543379	654625
	Hexb	35038.7	41360
	Tmsb4x	441390	485260
	Prdx3	136374	149498
	Vim	3915391	4.20773e+06
	Tnfrsf9	12153.7	15405.3
	Prkca	5825.67	6288.33
	Fcer1g	683.667	1074.33
	Prim1	25633	28154.3
	Evi2a	103.333	293.667
	Tpm3	779598	857505
	Tpm3	800884	867283
	Ubl4a	27298.3	32405.7
	Gna11	4167.67	4464.33
	Gnaq	928	663.333
	Abcb1a	5155.67	6350.67
	Cst3	4445.33	4941.67
	Eno3	393974	529776
	Lmnb2	95924.3	98828.3
	Mfge8	4589.33	4760
	Tap1	68262.7	89211
	Tgm2	7045.67	7406.33
	Emb	41579.7	52410.7
	Myd88	8964.33	10807
	Clk1	459.333	574
	Cd3e	96123.7	110088
	Cbl	18037.7	21162.3
	Ap1g1	20652	24771.7
	Hmbs	19060	23268.3
	Eif3a	138882	134589
	Furin	66.6667	142.667
	Cbx3	648017	689636
	Mov10	19125.7	18428.3
	Prkch	12824	14763.7
	Ggta1	888.333	981.333
	Bmp7;Bmp5;Bmp5	372.667	397.333
	Xrcc6	22224	22211
	Pnp	128619	154130
	Pcmt1	47265.7	54259.3
	Tsta3	27388.3	29095.3
	Irf8	2238.33	2649.33
	Nfya	2666	2569.33
	Gata3	381.333	469.667
	Glb1	9859	10946.3
	Pcgf2	192	200
	Irf2	2276.33	2464.67
	Zfp36l2	3421.67	3545.33
	Zfp36l1	515.333	713.333
	Itgal	125401	159344
	Cd247	94904.7	110965
	Cat	63348.7	75123.3
	Bcat1	2922.67	3102
	Ppib	739416	880098
	Capg	55181.7	55368
	Lta4h	243772	269926
	Impdh2	187920	208530
	Acp2	1095	1391.33
	M6pr	36721.3	45404.7
	Cdk11b	19337.3	20139
	Ccnb1	6837	8092.67
	Tnfrsf1b	1099.67	1265.67
	Mcm3	267203	282934
	Pou2f1	2316.33	2429.67
	Rps2	1158701	1308725
	Fas	39.6667	58.6667
	Nfkb1	30053.3	34557
	Lyn	345.333	414.667
	Bmi1	98.3333	102.667
	Ubtf	42859.7	44754.7
	Itgb7	8252.67	9316.33
	Tln1	168663	203709
	Ezr	189376	210387
	Msn	660630	752904
	Rdx	568023	666832
	Ctnna1	8706.33	8033
	Fli1	38566.3	39699.3
	Ptma	3.82844e+06	3798399
	U2af2	173032	182680
	Glud1	187404	196584
	Pik3r1	14122.7	15865.3
	Psmd7	85988	91523.7
	Sars1	91016	109967
	Marcks	142.333	243.333
	Fkbp1a	344617	381756
	Man2a1	11906	15109.7
	Snrpb;Snrpn	348274	391171
	Map4	41600	46599.3
	Ets1	8163.67	10230.7
	Gna13	31844.7	36212
	Plaa	39451	44266.7
	Xrcc5	21724.7	22399.3
	Rpl3	600023	674564
	H2ax	21914	15804.7
	Crem	1041	686
	Pdia3	913062	1.15589e+06
	Lef1	2082.67	2234
	Mgat1	6299	8331
	Vav1	39057	47596
	Braf	92	89.3333
	Cebpb	173.667	174.333
	Psmb8	261957	297797
	Psmb9	90779.3	108564
	Aco1	16692.3	21996.3
	Apex1	63038.3	58645
	Adh5	135680	147562
	Col2a1	72.6667	82.6667
	Max	12564	13107.7
	Adss1	270.667	382
	Nap1l1	226911	247014
	Atxn10	26133.3	30102.3
	Celf1	22587.7	26490.7
	Nckap1	3024.67	3446
	Mug1	467	483.333
	Marcksl1	631.667	653.333
	Rxrb	3008.67	3343
	Kif2a	150	155
	Kif2a	33546	37472.7
	Grn	412	557
	Dpp4	21676	24836.7
	Prkcd	4585.33	5566.33
	Tbp	4586.33	5089.67
	Pabpc1	349624	402013
	Ptpn6	251948	259164
	Ptpn22	5824.33	7047.33
	Ftl1	41145.3	39026.3
	Hexa	3608.67	3965.67
	Casp1	5706.67	6304.33
	Casp2	5083.67	5453.67
	Nedd8	106817	119056
	Ahsg	8985	12113.3
	Oat	54811.3	64939.7
	Ccnb2	3768.33	4480
	Ccnd2	790	903.667
	Ccnd3	2102.33	3306.67
	Cdk4	27201.7	29208
	Ppic	62873.7	72254.3
	Nktr	1819.33	2020
	Fkbp4	193658	211461
	F2r	1629.67	1777
	Cbx2	36.3333	42.6667
	Hmgb2	2583891	2578436
	Ccl5	1317.33	2192.33
	Tbxa2r	585	665.667
	Des	284	129.333
	Cd28	20000.7	22277
	Aimp1	112243	126591
	Rbpj	11588.7	14833.3
	Prkar2b	1378.33	1378
	Akt1	44210.3	55696.3
	Dbi	163967	214531
	Map2k1	23389	26485.3
	Scp2	42275	52366.7
	Slc2a3	5818.33	7381.33
	Ssb	263438	286897
	Drg1	58823.7	65453
	Serpinc1	44771.7	49254.7
	Kras	8152.67	10070.7
	Wars1	85557.7	94857.3
	Kif4	19975.3	21629.3
	Nedd1	24235	14130.7
	Pola1	19732.7	21452.3
	Prim2	25703.7	27881.3
	Pola2	22462	23222
	Ranbp1	399884	438568
	Mif	1.51365e+06	1649767
	Il2rg	10706	13013.7
	Usp4	25682.3	30894.3
	Ptpn11	12405	14314.7
	Rab3d	25353.7	34861
	Rab5c	85418.7	100246
	Rab6a	46340	54156.3
	Rab6a	370.667	425
	Rab21	81848.7	97363
	Rab22a	10432.3	11324.7
	Rab24	3388.67	4235
	Rab17	258005	270745
	Rab18	66874.3	80377.3
	Rab19	5666.67	9129.33
	Icam2	2792.67	2972
	Thbs1	313.333	379.667
	Ly6g	522.333	0.1
	Pdha1	110176	119784
	Fah	639	765.667
	Fbl	338788	330794
	Canx	215691	265342
	Ap1m1	69706.7	82854.3
	Rfc1	13039.7	14441
	Prdx1	2207764	2.47926e+06
	Ttk	715	917.333
	Ptpn1	39227.3	42204
	Ptpn12	2620.67	3345
	Fmr1	193	225
	Fmr1	13027.3	14963.3
	Ldlr	4175.67	7488.67
	Rpl12	1004413	1.13784e+06
	Rpl18	871092	920824
	Btk	2.66667	2.33333
	Tap2	66720.7	84415
	Sar1a	42289.3	60915
	Cpox	22182	24545.7
	Gnl1	7446.33	8490.67
	Ppm1b	19965.7	22987.3
	Por	30372	37936.7
	Cd69	2863	5108.67
	Lig1	93980.3	98427.3
	Hmgcl	13373.3	15025.3
	Hsf1	272	331.333
	Hspa9	314132	331514
	Dnm2	72630	84545.3
	Man1a2	1486.67	1764
	Traf1	4658.33	6090
	Traf2	3823.67	4183.33
	Tjp1	893	460.333
	Fyn	30041.7	35637.7
	Cdkn1a	341	570.333
	Fen1	109327	114207
	Cap1	722466	853341
	Tkt	775438	848274
	Chd1	2633.33	2924
	Cd82	7432	8253.67
	Vps26a	17042	18300.7
	Vhl	1696.33	1880
	Tfam	21369.3	21424.7
	Ighmbp2	623	777
	Rpl28	683728	737999
	Ltb	94.6667	80.3333
	Elk4	94.3333	108
	Acsl1	820	965.333
	Kdm5c	194.667	242.667
	Abca2	13	18
	Csk	125996	147159
	Cd27	16536.7	21544.3
	Eci1	48322.3	57287
	Foxk1	9768.67	10633.3
	Septin2	71694	83457.3
	Septin1	294031	347809
	Stat1	170736	245711
	Stat3	140	165.667
	Stat3	31314.3	38832
	Stat4	39943	49612.3
	Stat5a	4737	5091.33
	Stat5b	34555.3	35526.7
	Pik3ca	38.6667	50
	Eps15	10117.7	11182
	Pura	39424.3	43141.7
	Txk	1445.67	1655.33
	Htt	2606.33	3081
	Dpagt1	397	474.667
	Cct8	405534	456309
	Cox6a1	8895.67	11971.3
	Msh2	34480.3	37679.7
	H1-4	3.61591e+06	3.37306e+06
	H1-1	1.88357e+06	1.5973e+06
	H1-5	6.10609e+06	5.90824e+06
	H1-3	1.63478e+07	15581043
	Egr3	72.6667	101.667
	Dck	36584.3	45422.3
	Zap70	102553	120368
	Itgav	3302	3472.67
	Akr1b1	323141	356072
	Crebbp	1907.33	2211
	Man1a1	2783.33	3588.33
	Fkbp2	116010	133441
	Acadm	24867	27221.3
	Rangap1	111910	131620
	Sipa1	11524.7	13220.7
	Cdkn1b	8014.67	8210.33
	Nsf	45977	49541.7
	Vps4b	55211.7	63369
	Psmc2	164997	184267
	Rab11b	300318	344524
	Fdx1	5648.67	6974.67
	Nf2	2355	2544.33
	Adss2	110293	120877
	Pdcd2	12037	14415.7
	Brcc3	13295.3	14407.3
	Nedd4	9199.33	11156.7
	Stt3a	25574.7	31854
	Cryz	1606.67	1340
	Tes	47828.7	53838
	Aldh2	2598.67	2383.33
	Aldh3a2	12397	14257
	Capza1	465412	556645
	Capza2	176762	201469
	Capzb	662070	764797
	Srprb	42015	48229.7
	Ccr7	1796.33	1391
	Gsr	39334	44082
	Mtx1	13491	14752.7
	Map2k4	16696.3	20401
	Mapk14	28330	34533.7
	Gfpt1	20149.3	25652.7
	Pfkm	14472.3	17030
	Rpl6	882016	998495
	Rpl29	295461	272091
	Fosl2	684.667	800.333
	Crkl	55114	62429
	Rplp1	56727	58219.3
	Rpl5	535807	619091
	Rpl13	1003523	1095076
	Rpl36	454991	522890
	Rpia	25404.3	32051.3
	Xcl1	1299	4575.67
	Eif1	198222	245572
	Anxa5	210958	252970
	Epb41	9285.33	10156.7
	Rfx1	5808	6108.67
	Abcd1	5639.33	5762
	Tbca	152552	161636
	Idua	55.6667	68.3333
	Ppp3cb	6732.67	7591
	Ppp3cc	1798.67	1872
	Lmna	9864	11183.7
	Hspa4l	9210	11139
	Pcnt	4382	4501.33
	Brca1	333.333	389.333
	Cbr1	48072	57575.7
	Fpgs	163	203.667
	Cox7a2	9505	11152
	Slc25a4	225850	248986
	Cit	3374.33	3972
	Nr2c2	2642.33	2815.33
	Ercc3	2275	2521
	Mapkapk2	6529.67	7677.33
	Serpind1	306.333	432
	Slc11a2	143.667	195.667
	Hnrnpa1	609913	664814
	Inpp1	10553.7	13840.3
	Ppm1a	7070.67	8236
	Ptpre	2580.67	3309.33
	Cenpc	4058	4229
	Pcyt1a	1742.33	1806.67
	Cdk5	8525	9098.33
	Hcls1	166273	189605
	Mcm4	179651	188586
	Mcm5	282189	302034
	Psma2	260295	297040
	Psen1	3868.67	3984
	Flt3lg	78	77
	Srp9	66689.7	78501.3
	Impdh1	29675.3	31635.3
	Bckdha	1543	1509.33
	Hsd17b8	14614.7	14136.3
	Hsd11b1	22342.7	30520.3
	Ahcy	248599	262827
	Cd7	559.333	639.667
	Nat2	6699.67	7590
	Gdi1	13053.3	16058.7
	Sts	2976.67	2976.33
	Arsb	10271.3	14805.7
	Shmt1	53962.7	53461.7
	Atp6v1a	61377.3	74439
	Atp6v1e1	33251.7	38209
	S100a11	76350.7	96345.3
	Acadvl	40588.7	45999.3
	Pa2g4	549666	578337
	Tspo	3446	6142.67
	Cast	23403.3	26558.3
	Cast	68.3333	102.667
	Rab7a	320852	371921
	Uros	428	425
	Acadl	112439	128810
	Ppox	9884	13025.3
	Rpl9	660119	768884
	Plcb3	30.3333	36
	Gla	3204	3554.67
	Xpc	200	253.667
	Hsd17b4	21864	26536.7
	Ccr5	3693.33	6232.33
	Ccr2	477.667	1117.67
	Clcn3	950.667	1188.67
	Dynlt1	21703.3	26866.7
	Adcy7	1564.67	1979
	Gss	4442	4784.33
	Hdgf	181950	169471
	Atp6v0d1	8246.33	9944.67
	Slc25a5	1891195	2151550
	Slc1a5	14765	16912.7
	Ccna2	11807	12816.3
	Mnat1	11473.7	12506
	Mybl1	517	435.667
	Sqle	3039.33	4207.33
	Kpna2	86556	98891.7
	Jak1	11806	14357.7
	Pold1	34663.7	39153.3
	Polr1c	10168	11054.3
	Usp10	8820	10089.7
	Pkm	4517.33	5874.33
	Pkm	2792996	3.24596e+06
	Ube2e1	20612.7	21022
	Ube2e3	1606.67	1880
	Ndufs6	23081	25651.3
	Uck1	3908.33	4471.67
	Upp1	54.3333	36.6667
	Stat6	10815.7	12698.3
	Rida	12994	12382
	Cpt2	7909	8209.67
	Sult1a1	624.667	920
	Tmem165	9251.33	10238.7
	Tia1	20633.3	22741.7
	Rpl10a	747393	826819
	Map3k1	62	96.6667
	Nudt1	411.333	416.667
	Dbt	13174.7	15605.3
	Cux1	490.667	493.333
	Cebpz	7664.67	8512
	Rabggtb	3004	3344.67
	Limk1	72.3333	144.333
	Hccs	15969.7	18545.7
	Arnt	489.667	534.333
	Fdft1	2341.67	3465.67
	Pctp	1418.33	1312
	Pitpna	63667.3	74382.3
	Pitpnb	55392.7	66142
	Slc16a1	15101.3	15790.7
	Rab2a	157697	190792
	Anapc1	4883.33	5628.67
	Cnbp	38829.3	46282.7
	Cnbp	130705	143912
	Idh2	23736.3	24421.3
	Dnajc2	33493	36980.3
	Stmn1	1.34524e+06	1.29671e+06
	Atxn1	1361.67	1726.67
	Msh6	26930.3	29001.7
	Pms2	1096.67	1134
	Rad23a	10303.3	10913.3
	Rad23b	78812.3	86682.7
	Nub1	30616.3	34577
	Faf1	10908.7	13192
	Psmc4	102536	116789
	Tango2	916.333	1197
	Adsl	82296.7	89540.3
	Ddx6	105860	126870
	Adprh	52088	54135
	Slc12a2	12.3333	15
	Gem	2371.33	2977.33
	Abcd3	1487.33	1653
	Sh3bp1	60229	65917.3
	Kmt2a	138.667	150.333
	Rab8a	101571	128591
	Adk	33425	32173.7
	Lrpap1	10047.3	12042.7
	Entpd1	14435.7	20311
	Golga3	3241	3398
	Atp5mf	422150	480645
	Rrp1	14056.7	15144.7
	Ctsw	34477.3	44642.3
	Arpp19	170186	198145
	Gfer	2031	2356.67
	Acyp1	52141.7	58704.7
	Atp5mpl	44179	54377.3
	Nudt2	21447.3	25717.7
	Atp5f1e	133929	159630
	Atp5mc2;Atp5mc3;Atp5mc1	0.1	82.3333
	Cks2	7592.67	9882
	Cox6b1	431256	518942
	Cox7b	8086	7393.67
	Cox17	5623	6392.33
	Cyb5a	92781	95400
	Usp5	64619.3	77437.3
	Atp5f1b	1390685	1545163
	Ucp3;Ucp2	170	166
	Dnase2	50	96.6667
	Ctbp2	630	712.333
	S100a1	396.667	3800.33
	Tdg	1546	1728
	Maz	3307.67	3451.67
	St14	168.333	172.333
	Pdcd5	105529	121560
	Znrd2	1803.67	1955.67
	Fus	170239	169899
	Exosc10	21784	22580.7
	Usp25	8948.33	10433.3
	Ncstn	10292.3	12522.7
	Samsn1	4077	4774.33
	Atp6v1d	10757	12865.3
	Erp29	66972.3	76838
	Eef1d	5075.33	5687.33
	Eef1d	371263	414767
	Actn4	165148	187466
	Snrpa1	164186	173107
	Slc16a3	10283	13075
	Rce1	1395.67	1707.67
	Tm9sf2	16763.3	20440
	Sesn2	135.667	264.667
	Idi1	44187	61179.7
	Nadk	1745.67	2071.33
	Mrps21	13139.3	14813
	Mrps6	13416.7	12968
	Rasa2	3147	3293.33
	Acot8	9792.33	11809.3
	B3gat3	1282	1242.67
	Smpdl3b	379.333	379
	Eef2	1.37219e+06	1.59157e+06
	Opa1	7936.67	8474.33
	Klf16	1385.67	1287.33
	Ptpa	76773.7	84009.7
	Strn4	6061.67	6993.33
	Foxp1	13761.3	14961.7
	Ctdsp1	3200.67	3453.67
	Fam207a	21859.3	22979.3
	Paxbp1	9906.67	12157.3
	Btbd1	2023.33	2368
	Aaas	15072.7	16503.7
	Tm6sf1	957.667	1098
	Tpm1	11347.7	11955.3
	Tbc1d10a	3941.33	4519.33
	Tubgcp3	7928.67	8315.67
	Tnks1bp1	360	299
	Gmeb2	4045.67	4786
	Vps33b	6535.33	7603
	Bcl2l13	9764.33	10091.7
	Pdrg1	59.6667	132.333
	Cpne2	476.333	563
	Senp1	2191.33	2297.67
	Pcif1	4955.33	5634
	Nup43	18134.7	20241.7
	Rab2b	954.667	1078
	Eif5	109963	321964
	Ythdf1	9442.67	9850.33
	Wdhd1	15412.3	17785.7
	Hps5	281.333	378.333
	Polr3b	1119.67	4309.33
	Lman2l	656.667	695.333
	Anks1a	142.667	174.667
	Sf3b6	82588.7	88714.3
	Rin3	2879.33	3619.33
	Mrtfb	252	232.667
	Pcmtd1	37	43.3333
	Sirt6	2518.33	2660
	Kdm2a	6559.67	7535
	Arpc4	815935	1.03741e+06
	Elof1	5422.33	6041
	Sec61g	112188	138771
	Ruvbl1	150839	165301
	Eif3e	150588	176722
	Espl1	1008.33	1153
	Pcbp1	425263	499897
	Pdxp	4802.33	4849
	Gabarapl2	37936.7	48695.7
	Romo1	14210	17701
	Ube2g2	7792.67	10131.3
	Nploc4	18227.3	20218.3
	Actb	11635721	1.33741e+07
	Morf4l1	26218.3	30100
	Cdc42	615042	735719
	Cdc42	1255	1371.33
	Cirbp	37973	39667.3
	Ensa	46583	51136
	Eif4a1	1.41673e+06	1618886
	Rps20	798709	924678
	Polr2i	14191	15034.7
	Dnajc5	6881.67	7025.67
	Rab5b	10013.3	10951
	Chp1	5129	5901
	Cks1b	6900.33	10238
	Rab10	82135.7	105930
	Rab8b	42849.3	57319
	Ube2d3	227307	277993
	Ube2d1	4902.67	5448.67
	Ube2m	114473	108796
	Ube2k	167202	185459
	Ube2n	345353	387179
	Actr2	439377	555024
	Actr1a	35482.3	40646
	Tmem258	10466.7	11209
	Cops2	32790.7	36967.3
	Arl4c	661	1194.33
	Arl1	36877	46597
	Taf13	0.1	230.667
	Polr2f	9233	9178.33
	Abce1	96780.3	109834
	Rap2b	9994	11321.7
	Rpl26	833985	916036
	Psme3	115390	156588
	Magoh	210503	241396
	Rpl27	1.24112e+06	1.34052e+06
	Smg6	1544.33	1718
	Depdc5	200.667	167.333
	Rpl37a	319016	374768
	Naa20	5692.67	6363.33
	Sec61a1	38259.7	46038.3
	Arf4	17797.3	21541.7
	Vbp1	54861.3	67203.3
	Dad1	70639.3	71782.3
	Copz1	63863	64774
	Sumo2	54178.3	65388.7
	Ufm1	72427.3	86179.7
	Dcaf7	9707.67	10625.3
	Wdr5	45088.7	44118
	Ap1s1	40216.3	43593.3
	Lmo4	1469.33	1604
	Nutf2	105939	109567
	Hnrnpk	1131540	1.23666e+06
	Hnrnpk	2910.67	3303.67
	Ywhag	124465	135294
	Lrch1	3869.67	4499.33
	Usp46;Usp12	464	599.333
	Rras2	140913	162069
	Timm10	14082	17059.3
	Timm13	72078.3	84335.3
	Timm8b	1372.67	2819.67
	Rps7	1.06358e+06	1.20395e+06
	Ppp1ca	97365.7	110816
	Ppp1cb	48892	52331.7
	Psmc1	117888	136826
	Psmc5	134763	148174
	Rps8	1.22276e+06	1.44109e+06
	Rps15a	1.12505e+06	1.36246e+06
	Ube2g1	12643.3	22059.3
	Ube2h	25898.7	34914
	Ywhae	707629	770991
	Rps14	1.04073e+06	1126436
	Rps23	636571	716537
	Rps18	1601644	1.84095e+06
	Rps29	348919	420621
	Rps11	1098315	1.25693e+06
	Rps13	1267243	1.44292e+06
	Snrpe	394581	448300
	Snrpf	209783	233048
	Snrpg	278975	317953
	Lsm3	46278	44775
	Lsm6	128771	131671
	Snrpd1	408218	451025
	Snrpd2	633514	667943
	Snrpd3	534042	630138
	Lsm5	23348.7	19975.3
	Arf6	114305	140024
	Psmc6	138025	161560
	Tbpl1	8037	9681
	Selenot	12604	16514.7
	Kcnab2	125120	147128
	Polr2g	40248	43427
	Dynlrb1	43120.7	50209
	Ypel5	6217.67	7794
	Rps4x	1.45257e+06	1643714
	Ppp2cb	156888	179902
	Rpl18a	640892	776500
	Ap2s1	27939	42640
	Hpcal1	51973.3	59834.7
	Rpl23a	931825	988372
	Rps6	784173	862927
	Mtpn	49431.7	48197
	H4c1	83035131	8.47109e+07
	Atp6v1b2	42650.3	52440.3
	Rab1A	137309	162967
	Ran	1.93281e+06	2.15624e+06
	Rpl23	1191530	1.37393e+06
	Rap1a	43798.7	50616.3
	Rps15	409075	470569
	Rps24	393717	498907
	Rps25	1.22794e+06	1.35491e+06
	Rps26	582165	654929
	Rps28	1.35819e+06	1.49236e+06
	Fau	698424	817284
	Elob	192436	217829
	Gnb1	167019	191000
	Polr2l	36384.7	41513.3
	Rbx1	50865.7	54255
	Gnb2	81078.7	94064
	Rpl30	1225415	1.48283e+06
	Rpl39	126081	158168
	Cycs	303032	367491
	Rpl31	795448	874950
	Rps3	2.30281e+06	2.58406e+06
	Rpl32	493496	565860
	Gtf2b	30020	32549
	Rpl8	578677	620680
	Ybx1	267803	270897
	Pfn1	15344959	16783782
	Rps27a	136267	167940
	Uba52	7.22686e+06	8.03584e+06
	Tra2b	123725	135092
	Rac1	1.03179e+06	1246924
	Tle5	520.667	574.667
	Pafah1b1	91410.3	104339
	Hspa8	2.84371e+06	3.25374e+06
	Vamp3	32285.3	34427.3
	Tpt1	496727	561427
	Mpc1	7461	8486.67
	Dnaja1	92663	107895
	Hspd1	644539	722772
	Vamp2	4115.67	4774.67
	Eif4e	92748.3	95352.7
	Atp6v0c	8801.33	14314.3
	Mapk1	154028	176999
	Ppp1cc	239615	300014
	Gnas	39816	46238.7
	Ywhaz	1.52849e+06	1.71314e+06
	Nfyb	8732	9014.67
	Kcnab1	400.333	812.667
	Ube2b	3842.33	4327
	Crnkl1	18469	20290.7
	Hmgb1	1.15467e+06	1091211
	Sumo1	76373.7	82642
	Dynll1	92092	102308
	Gng2	5993.33	5890.33
	Eif5a	2.099e+06	2.2947e+06
	Crip1	986931	1.15469e+06
	Actg1	777995	942631
	Supt4h1a;Supt4h1b	32265.3	35976.7
	Rps17	730417	795795
	Ube2i	360458	399630
	Selenow	913.333	894.333
	Rala	22492.7	24912
	Rps12	764398	964193
	Rps10	921276	1.08584e+06
	Ppp3ca	21517.7	26592.7
	Ppp2ca	11712.3	13501.3
	Phb	332084	364125
	Csnk2b	76747.7	86174.7
	Rpl22	959060	930756
	Actc1	37455713	4.29476e+07
	Ube2l3	448343	507529
	Rack1	1458291	1670332
	Acta1	172718	165911
	Prkacb	60736.3	69039
	Ywhaq	421137	543012
	Tuba4a	716983	851003
	Tuba1a	5715526	6419890
	Tubb4b	5.02006e+06	5.86198e+06
	Tuba1c	191651	167391
	Prkcb	8709.67	9492.33
	H3c1	17108.3	51030.7
	Ywhah	391783	443940
	Ranbp9	9647.33	11650.3
	Zhx1	51	62.6667
	Sbds	50926.7	52242.7
	Smpdl3a	1680.33	1724.67
	Kpnb1	214979	234933
	Pip5k1a	1422.33	1664.33
	Traf5	575.667	662
	Psmb7	48577	53012.7
	Traf6	2613.67	3029
	Lxn	5733	7403
	Map4k1	14247.7	15688
	Gimap1	19154.3	22291
	Itpr3	5867.33	6946.67
	Map2k6	1248	1083
	Ebp	42764.7	50292
	Myo1f	21463	29828.3
	Nfic;Nfia	179.333	209.333
	Gpr143	61.3333	189
	Pkn1	24085.7	29378.3
	Rad54l	428.333	555.333
	Surf6	13460	13708
	Vamp7	7446.67	8774
	Hdac2	21352.7	23167.7
	Mpp1	11878	13423
	Aup1	11642.7	13468.7
	Pebp1	324388	326560
	Stam	1310.67	1410.67
	Stim1	13575.7	16237.3
	Ctps2	28897.3	31714.7
	Was	86145.7	102222
	Tial1	23113.3	24549.7
	Hnrnph2	28681.3	28478.7
	Rock1	8448.33	9676.33
	Rock2	3105.67	3317.33
	Smad1	652.333	619
	Tank	150.667	159
	Hint1	411719	456470
	Ezh1	23.3333	35.3333
	Nfyc	8545.67	9780
	Ufd1	18898.3	21067.7
	Terf1	2734	3435.33
	Elavl1	267432	287207
	Rad50	13996	15195.7
	Usp9x	11233.3	12145
	Tp53bp1	2189.67	2152.33
	Cux1	134.667	134.333
	Idh3g	41554.3	47623.3
	Galnt3	503.333	864.667
	Rit1	16	35.6667
	Ext2	183	259.667
	Evl	113992	144682
	Slc9a3r1	217684	229269
	Bid	7223.67	8247
	Eif4ebp2	2797	2681
	Stx4	7328	7595.67
	Vasp	154400	189362
	Cxcr4	80.6667	73.3333
	Ldb1	5050.67	5745.67
	Siae	1122.67	1326.67
	Naca	43134.3	49256.7
	Irf3	13670.3	13100.3
	Casp3	140381	159338
	Urod	21572	23987.3
	Ctps1	29959.7	34238.7
	Gaa	3335.33	3655.67
	Polr1b	5151	5465.33
	Atp8a1	33	24.6667
	Cct7	288031	320686
	Cct2	450803	501908
	Cct4	433911	460069
	Cct5	266602	301273
	Cct6a	268781	295457
	Cct3	428499	485300
	Gabpb2	6096.33	6720.33
	Atf1	1669.67	1520.67
	Tgfbi	71.3333	74.6667
	Renbp	3.66667	17.3333
	Stim2	2888.33	3919
	Tnik	4833.33	5788
	Tnfrsf26	1360	1300.67
	Wnk1	6873	7469
	Phf5a	99136.7	112713
	Txnl4a	11723.7	13317
	Rpl36a	267139	296678
	Tubg1	24943.3	29468.7
	Cbx1	36808.7	35321
	Eloc	107438	116833
	Arf1	619482	792805
	Arf5	92214.3	109829
	Erh	195607	203189
	Ap2m1	48375.3	57484.7
	Rhog	156062	168392
	Rpl19	286511	315881
	Serf2	19134.3	17639
	Srsf3	792474	852197
	H3c2	9217293	9268731
	Isoc2a	25936.3	29121.7
	Mcl1	3772.33	4141.33
	Nptn	9509.33	11599.3
	Bach2	286.333	276.333
	Polr1d	13637.3	14931.3
	Nfatc3	1082.33	1282
	Mcm2	202676	217570
	Mcm6	231067	244379
	Prkdc	592	695.667
	Csrp2	228.333	313.333
	Csrp1	91710.7	103585
	Kif20a	8221.67	8938
	Nxn	5634.67	6657
	Pkp1	145.667	72
	Rps3a	1198718	1358728
	S100a13	171212	196621
	Sms	23012.7	25455
	Taf1a	418.333	434.333
	Taf1b	1797	1922.67
	Etv6	983	716
	Sptlc2	11590.3	18767.7
	Sephs2	850	1201
	Ncf4	7837.67	9530
	Atp1b3	131216	156423
	Psme1	761806	902902
	Psme2	525136	631554
	Frg1	58701.7	60887.7
	Cdk2	50547.3	57573
	G3bp2	32370	37582
	G3bp2	742	703.333
	Anxa11	92515.7	111124
	Lig3	4402	5010
	Vps45	5993	6469
	Lyst	419.333	509.667
	Crmp1	54151.3	62143.7
	Anxa4	61077.3	64770.3
	Nbr1	24	25.3333
	Mprip	479.333	562.333
	Slbp	7808.67	7136.33
	Fhl1	803.333	1158.33
	Atp5pf	12471	13319
	Bop1	30029.3	33035.3
	Mylpf	6866.67	6774
	Rps5	581308	659110
	Dok1	6033	5314.67
	Ppp4c	32125.7	36366.7
	Smad4	1828	2375.67
	Tarbp2	2095.67	2433.33
	Aurka	2392.33	2795.33
	Coq7	1579.67	1737
	Eya3	5358.67	6519.67
	Rgs14	10154.3	12477.3
	Txn2	12921.7	14382
	Gclc	5856	6359
	Smarcc1	42424.3	46335.3
	Tep1	34	51.3333
	Cpt1a	3756.33	3925.67
	Polr2c	41120.3	43341.7
	rp9	3009.67	3545
	Wbp2	10568.7	12579.3
	Thumpd3	25694	28079.7
	Cry1	185.333	276.333
	Xrn1	7180.67	8291.67
	Smn1	2049	2542.67
	Fh	110210	119692
	Fxyd5	13250	13040.3
	Pstpip1	47656.7	62095
	Map4k4	1903	2290.67
	Ctsc	26310.3	31792.3
	Anp32e	227779	239055
	Lypla1	61600.3	75092
	Jpt1	100830	115278
	G3bp1	159892	186057
	Slc35b1	865.667	1463
	Casp7	3922	4743.67
	Pex7	1157.67	2574.67
	Rbbp6	2854	2948
	Dtymk	60272.7	64697.3
	Ung	905.333	914.333
	Shc1	9475.33	11218
	Gnpat	4524.33	5320.33
	Atp9b	85	105.333
	Atp8b2	237.333	266.667
	Tubb5	1195396	1357839
	Psmb4	157038	177241
	Rplp2	796589	829373
	Uqcrh	33322	42710.3
	Prdx5	260398	325569
	Tcf7	7171	6570.33
	Gabpb1	33078.7	44468
	Gabpa	24439	27053.7
	Xdh	4741.67	7536.33
	Hmmr	2836.33	3357.67
	F8a1	1109	1249.67
	G6pdx	60901.7	74220
	Apoa1	17484	18390.3
	Itga4	1525.33	1428.67
	Yy1	15359.3	15970.3
	Hnrnpul2	119726	130454
	Creb1	27313.3	28792.3
	Hmgcr	351	585.667
	Top2a	251378	275493
	Sec23a	13156.7	14990
	Notch1	330	560.333
	Rsu1	61667.3	71257.3
	Nme2	2.14017e+06	2.52027e+06
	Vcp	455497	541535
	Ly9	18739.7	21080.7
	Uba1	307170	367176
	Prkcq	29260.3	31049
	Pdcd1	156.667	240
	Ctnnb1	208.667	374.667
	Jup	4628.33	1592
	Sos2	131	151.333
	Mtf2	2174.67	3537
	Sap30bp	23654.3	27001.7
	Nucb1	42433.7	48590.7
	Mark3	1030.33	1042.33
	Cdk7	11477.3	12642.3
	Enah	35	0.1
	Galt	2190	2634.33
	Atp5f1a	1254753	1.34762e+06
	Ikzf1	43306.7	47585
	Runx1	2266	2385.33
	Itk	13168.3	14977
	Pfdn6	63689.7	72702
	Eif2ak2	3335.67	4039.33
	Rela	24189.3	26862.3
	Ckb	2758	3894.33
	Smpd1	546.667	754.333
	Smarcad1	2542.33	2977.67
	Cdk16	21	16.3333
	Top1	46800.3	49832.7
	Mpg	778	734.667
	Relb	573.667	647
	Acp5	24673.3	33456.7
	Rac2	667244	825881
	Rcn1	15992	17482
	Mark2	15163.7	16610.7
	Fabp5	181001	181722
	Adam8	330.333	469.667
	Pc	2610.33	3342.33
	Rnasel	450.667	557
	Larp7	19215	18831.3
	Eif5b	25054.3	27673
	Cab39	44311.3	56500.3
	Ptpn2	18417.3	19693
	Atp5me	363646	386196
	Nr4a2	7.33333	16.3333
	Sh3bp2	177.667	182.333
	Anxa7	58372.3	70385.7
	Igf2r	8909.33	11734.7
	Ect2	806.333	937.667
	Map3k8	156	179
	Serpine2	2970.33	4638
	Acads	61047	65999
	Cd244	2449	2059.33
	Lgals3bp	32716.7	44442.7
	Bax	99216.3	105268
	Plk1	12100	13820.7
	F13b	241.667	333.333
	Cbfb	20351.7	22878.7
	Cbfb	111586	116628
	Cnn2	280965	345428
	Tle3	8955.67	9760
	Tgm3	83	15.3333
	Lyar	26007	27147.7
	Rad51	7120.67	8254.67
	Zbtb14	371	448
	Pecam1	824.667	927.667
	Eps8	340.667	351
	Tfdp1	7878	8515.67
	Padi2	17120	26730.7
	Runx2	9225	10334
	Fbln1	1161.67	1322.33
	Ssrp1	112987	117973
	Ncf1	3378.33	4031.67
	Slc7a1	7364.33	9048
	B4galnt1	42042.3	54881.3
	Gcnt1	276	249
	Chd8	3039	3390.33
	Inf2	1389.67	1465.33
	Ubxn2b	119	157.333
	Zc3h18	11012.3	10615.3
	Zc3h18	517.333	304.667
	Mcm10	301	326
	Rbm15	11618.7	12235.7
	Znf800	1964	2203
	Cep76	344.667	372.667
	Rbis	802.667	842
	Ppp4r2	20236	22799.3
	Rtel1	144.667	178.667
	Tanc1	799.667	984.667
	Npepps	28837	32564.3
[truncated: 5,711 more rows]
