# Supplementary material for: PIM kinase control of CD8 T cell protein synthesis and cell trafficking
Source: eLife. 2025 May 13;13:RP98622. doi: 10.7554/eLife.98622 (PMC12074636; doi:10.7554/eLife.98622)
Supplement: Figure 3—source data 1. [file elife-98622-fig3-data1.xlsx]

## Sheet: 3A
	Estimated protein copies per cell
		CTL (IL2)			CTL (IL15)
	Pim1	15345	13228	12895	570	670	832
	Pim2	1494	1308	1169	1782	1978	2257

## Sheet: 3D
		CD8 T cells number
	Time (Days)	IL2 WT				IL2 dKO
	2	1196662	1099982	950300	886416	893341	942842	1100131	931920
	3	5731910	6148946	5668303	5632355	3575350	3935326	4441354	3992799
	4	32456582	32837370	1.98162e+07	1.98719e+07	14897064	18696225	1.35444e+07	1.19231e+07
	5	103369216	134300402	8.15996e+07	8.44008e+07	37417948	63603536	5.19513e+07	4.54466e+07
	6	335361505	382097817	201990028	211604690	111787168	169753648	130777728	113440917

## Sheet: 3E
		% live cells
	Time (days)	WT							Pim dKO
	day 4	77.5	75.5	77.6	81.4	80	73.6		74.3	72.7	75.7	77.3	82.4	81.2
	day 6	85.4	86.5	89.1	90	88.9	89.2	85.8	87	87.7	88.3	90.1	91.1	90	89
