# Supplementary material for: PIM kinase control of CD8 T cell protein synthesis and cell trafficking
Source: eLife. 2025 May 13;13:RP98622. doi: 10.7554/eLife.98622 (PMC12074636; doi:10.7554/eLife.98622)
Supplement: Figure 4—figure supplement 1—source data 1. [file elife-98622-fig4-figsupp1-data1.xlsx]

## Sheet: 4S1
	Estimated protein copies per cell
	Gene Name	WT (IL-2) effector CTL			Pim dKO (IL-2)			WT (IL-15) memory T cells
	Hspe1	3421901	3490041	3303157	2386617	2912142	2987972	1269232	1336502	1224773
	Slc25a5	3172331	3003854	2948139	2635272	2916580	2717732	2010202	2351692	2092756
	Mdh2	2608524	2498881	2514302	1850092	2207752	2172766	1325487	1383886	1340282
	Atp5f1b	2262285	2096863	2062682	1851058	1952110	1915290	1493536	1651012	1490941
	Atp5f1a	1844104	1803137	1785219	1538856	1705275	1668055	1320086	1423039	1299737
	Park7	1716270	1732376	1787301	1375911	1627363	1550113	785603	771216	812554
	Hspd1	1818288	1736731	1504015	1212310	1384336	1421126	725295	751226	691796
	Sod1	1512153	1516250	1491152	1217418	1349807	1346059	865086	835095	831371
	Hint1	1038394	940674	878288	711414	815064	773838	488093	439526	441791
	Got2	856801	830250	877880	688556	814696	803448	463646	496654	473703
	Vdac1	829832	882041	846841	729081	793640	756882	553854	575675	572743
	Hspa9	772532	741030	796371	583256	683566	670204	315682	347610	331250
	Prdx5	772504	771188	733470	424231	584142	606364	337298	318664	320745
	Vdac2	709783	752519	767310	637550	708683	672681	467850	495123	471777
	Shmt2	737547	753918	730794	570597	670571	639937	305506	332185	312887
	Cox6c	651918	737295	726754	691688	729290	731694	585594	810329	696811
	Slc25a3	698505	720358	677973	505557	586458	600488	336708	394149	339186
	Phb2	698171	666595	667257	572950	624272	609149	370270	418778	386143
	Phb	668867	655591	633669	553320	594916	586661	359515	379742	353117
	Prdx6	627405	642640	683207	602222	643336	570706	469216	477501	449445
	Cox6b1	591925	624523	650151	630490	619007	583521	519172	541147	496506
	Cycs	573436	600814	583588	432705	503358	468411	370375	383560	348537
	Cox4i1	546470	608285	594858	539367	577253	535460	455695	517899	456432
	Atp5mf	543681	552545	565406	475756	545744	546163	426769	549214	465953
	Atp5me	527071	545757	565546	539446	525622	517678	368957	409309	380323
	Atp5po	583895	536015	476108	415015	472375	494323	373704	451631	398134
	Paics	536494	503461	542195	464577	484866	448078	338340	290109	300686
	Atp5mg	546236	506216	515843	445588	502463	501785	349700	407067	366087
	Atp5pd	491650	516093	536504	478443	496817	454299	344960	388361	348250
	Acot7	505296	489506	490312	327611	402117	410460	201084	208404	201547
	Fasn	584796	447375	419250	322554	495510	366235	260113	138243	147345
	Cs	460466	504302	478648	356625	432675	447396	291872	321849	310858
	Prdx2	547340	377264	511793	472583	482716	451904	357723	272798	359360
	Casp3	551974	344581	419667	275700	315901	312881	177138	144143	156732
	Snd1	426081	440157	444979	321296	377032	369208	163424	162027	165847
	Nmes1	395865	437099	349263	181398	272241	317410	212818	205044	188151
	Mtco2;mt-Co2	389641	394081	357623	286661	354937	350762	336009	355636	305878
	Etfb	354050	337718	370199	297729	329569	314656	239814	260027	245808
	Slc25a4	356685	330500	361476	333802	342373	329973	248485	259183	239291
	Atp5md	340810	331499	354629	340593	347231	297299	243510	243440	221885
	Aco2	324329	323393	358152	287436	317310	300734	177490	188130	181336
	Gars1	327317	308008	326438	220305	270499	270680	139785	128209	137877
	Atp5f1c	302681	298561	304334	273733	292967	270250	228813	227005	215167
	Vdac3	306200	297889	298816	243296	280321	272774	233481	237288	222346
	Fdps	304915	304029	276001	161722	210669	214080	86480	66746	79518
	Dbi	306866	297981	272646	273578	217363	177577	241296	233715	168581
	Prdx3	297295	297615	276104	202776	251499	236172	158115	147987	142393
	Etfa	306489	281978	256399	210828	241248	239135	190102	188711	181934
	Ndufv1	243926	265773	303981	211851	257850	262640	131295	148205	149680
	Idh3a	263589	269511	261354	220482	244733	227189	173821	189039	172481
	Kars1	264470	251079	249222	197781	226454	215503	139320	134777	129317
	Bax	218322	225789	249539	224491	236556	212356	101822	109203	104779
	Glud1	230943	222004	232333	220757	219658	216403	186916	209145	193690
	Mthfd1l	224459	218108	228631	180538	208042	196443	130282	137574	136775
	Acadl	217438	213544	237169	168042	192368	181298	128514	134576	123339
	Nsun2	216444	216330	225675	184924	208365	199771	97749	101146	100933
	Atp5f1e	205592	204956	239177	210031	211433	204832	141599	174504	162788
	Acly	219979	218949	210363	145387	181914	182316	80046	72266	77507
	Atp5pb	201308	225298	217216	188902	180480	205006	166350	175097	156548
	Nudt5	210832	208379	223682	176927	192846	189728	102183	106097	102193
	Tufm	205294	212454	210560	173574	200658	197706	134361	146229	133480
	Cisd1	209922	207340	206683	140502	184099	165177	119333	104817	107837
	Fh	210377	212516	194265	164072	188536	186096	119369	120958	118749
	Idi1	215395	220833	179855	119998	140249	136590	65056	57457	61026
	Uqcrc2	192044	197892	199823	164786	193816	186633	116533	133832	118552
	Acat1	192007	198539	195224	147273	179010	176130	131851	143118	137268
	Glod4	204686	192059	188370	152843	176439	181478	131929	129949	133812
	Sdha	208446	196570	175860	144740	166374	151107	139084	130510	126887
	ATP5IF1	207458	176524	188704	173651	176912	174105	132042	144584	142169
	Timm13	172849	180757	202653	147585	174037	139325	88077	82785	82144
	Hadha	199999	184548	171619	150782	163315	159973	145083	147826	135581
	Uqcr10	185003	185211	176978	148888	165158	163680	138384	138672	118385
	Hadhb	175814	189570	181036	164471	172583	167928	148074	163962	153211
	Ak2	189435	171991	179261	182415	187296	172195	99360	98229	98671
	Atp5f1d	182682	165299	180640	157851	166664	141292	94102	98439	101901
	Cyb5b	157794	177499	187544	118615	153356	122542	75637	70542	68474
	Txnrd1	192012	194019	135519	115192	144293	138267	90228	99105	95515
	Aldh18a1	183516	163708	167433	115221	146754	139523	68783	73043	70602
	Pdha1	159145	149147	190426	159684	185130	175635	121568	120583	117201
	Synj2bp	167470	157221	171810	149079	166319	158541	122486	131886	118374
	Ndufa4	155841	149166	186917	293157	232157	197087	232481	267710	238024
	Lap3	167515	162504	157793	118085	135835	136349	62382	60121	57697
	Arf5	146306	151427	173778	137003	145210	139244	111751	109993	107743
	Grpel1	160749	159343	149636	118156	134730	132381	77509	80171	77626
	Qdpr	148340	147330	163692	120845	147443	142210	95193	99757	103141
	Uqcrc1	152434	147603	148954	133521	151754	140259	101650	101054	96440
	Aldh9a1	142048	150216	151397	123346	140808	134889	104983	106294	105488
	Pdhb	142541	145851	146881	125290	134860	129015	96306	102924	99095
	Mtch2	154592	139855	140198	101195	123843	113964	81908	73436	69331
	Sdhb	142960	143696	142416	118779	135851	141484	126131	136270	125177
	Fth1	143937	134136	144533	64996	95034	98770	37172	35921	37843
	Fis1	129367	192110	87433	85348	72909	130203	147189	112004	130332
	Mthfd2	138696	138708	124542	86071	115335	110563	43979	39650	37160
	Sdr39u1	11567	209662	179452	9676	173041	83358	135918	74842	21175
	Casp8	138465	128259	131083	99050	111841	104717	66315	59964	60633
	Lypla1	141726	132335	118041	84461	102170	98331	81447	73246	70583
	Apex1	141601	122459	121147	108845	112714	102056	60412	56167	59356
	Oat	125539	131721	126232	111933	117342	119105	64732	65018	65069
	Idh3b	131172	117981	131078	109351	123165	114204	85609	90475	80926
	Tomm34	122579	120723	135057	101449	118956	112240	69960	73841	73186
	Ndufb10	126628	128816	122328	110235	113004	111932	89388	96703	88557
	Dld	127895	128765	117380	100966	114250	112640	84443	89501	83051
	Gpx1	126125	119484	126045	105696	121156	113145	87869	85012	80991
	Uqcrq	122423	121864	125850	97397	110747	120509	69589	86254	77219
	Myg1	121600	117467	116303	99831	111993	114530	84554	87852	84383
	Tmem14c	129003	113335	112605	100762	105347	85134	72588	84159	62867
	Ndufa8	116052	116871	121233	98749	103229	108307	77150	84125	78947
	Acaa2	117503	116924	119344	111018	110435	102704	131990	129204	131754
	Me2	125260	109716	114112	103755	108782	105988	105000	101898	101666
	Immt	109923	110030	117797	96055	109134	101447	74417	80930	76495
	Sfxn1	109689	113802	113460	95209	103765	98197	65621	74718	70461
	Ndufa6	111277	112060	109531	82088	91578	86642	59147	51407	35374
	Lrpprc	120501	103699	103256	86812	94992	89277	57937	58232	57069
	Mrpl12	88027	111270	127266	112072	103085	86116	58885	71754	52443
	Oxct1	84708	74802	161333	76923	76398	69726	58618	63226	58273
	Ndufa10	115571	100754	104360	91421	82991	86036	73978	73395	65623
	Suclg1	98260	105221	109359	89481	102294	99570	72391	82520	74838
	Trap1	106071	103384	102980	106547	106271	97335	63097	65064	64204
	Gsr	101357	104388	104089	74826	87910	89820	45424	43138	43684
	Slc25a11	108508	98217	98780	89097	74762	91639	92448	101315	88539
	Cat	93313	103173	108008	88083	96602	93159	75581	74230	75559
	Gpd2	105290	98820	98664	57823	75802	75287	34294	34172	33307
	Bdh1	105783	94065	100991	87606	96219	88052	90317	89178	84129
	Ndufs2	99090	102214	92843	82873	81324	78126	63826	75824	70717
	Acads	95908	93526	102913	86625	93709	90875	55799	72688	69510
	Rpia	95635	98502	95657	60797	78931	81762	33591	30163	32400
	Trmt5	236480	29349	20137	16572	20918	167961	17312	101889	101344
	Dlat	95119	91088	94789	68012	80790	78585	48847	51759	49841
	Ndufa9	105772	98834	74715	77656	72473	72136	80597	64141	59190
	Fkbp8	88569	90159	99598	67380	87628	80475	42658	43538	41279
	Cox5a	91016	96339	89367	80583	93712	55932	67986	79561	57674
	Fam162a	89375	91439	94232	76410	83827	85960	63206	65860	66982
	Ndufs1	86332	91225	93233	82914	88661	86454	67425	76101	71041
	Acaa1a	92591	84280	91665	75691	84001	82674	67149	77117	72992
	Tomm40	85377	82909	100075	76685	78275	81754	40078	44914	42090
	Cyb5r3	93983	86123	86987	66597	80700	79505	59437	57141	59187
	Bak1	97123	91359	74504	57324	70762	64197	53585	47383	43903
	Cyc1	87365	87227	88246	69376	73373	77921	52779	61367	55194
	Dnm1l	102018	86602	72744	55015	62380	60868	48909	45029	43954
	Ndufs3	98652	83052	78539	72811	75082	74123	63645	65254	61271
	Stoml2	88673	88858	82327	63223	74486	73498	43422	41148	37542
	Ogdh	88263	85242	85654	67560	76039	75723	54114	56972	54327
	Ndufb11	81913	92149	83932	74773	80651	72311	59082	58058	54966
	Ak3	79953	81446	90615	75221	82999	83468	73319	78499	76871
	Ssbp1	74791	81966	84657	76033	76722	70945	59260	60769	56451
	Ndufs5	81617	76304	76442	73126	69952	67126	61174	61110	59134
	Sod2	76280	82532	73914	63606	64572	66843	51179	49737	45631
	Grhpr	77205	76440	78414	56462	67766	69135	42933	38033	46748
	Sucla2	72698	78767	80302	69647	76790	65288	53425	62992	56584
	Dlst	74191	75469	80874	72807	77474	73345	51632	62014	55463
	Ndufa5	83070	74004	70807	63375	64735	58124	50195	47245	46863
	Suclg2	76414	73897	76557	63235	69781	65750	43564	51595	48234
	Ndufa12	73788	76382	75370	66663	72180	68849	57507	65757	57659
	Eci1	79949	73099	70482	55105	63776	65290	54767	60286	56808
	Ndufv2	73321	75341	73165	65762	69901	62238	54490	56216	51595
	Rexo2	68507	81017	71883	74600	74027	72358	66083	65919	66353
	Uqcrfs1	66672	72745	80601	61055	63231	65695	46080	46858	42936
	Idh3g	77712	70727	71277	60165	65112	59155	50498	49016	43356
	Uqcrh	67166	67433	84190	69481	59041	37586	45049	51234	31848
	Lonp1	71685	71058	67272	45830	57955	56095	31282	33049	31363
	Ndufa2	77705	63302	68860	65259	79057	77049	56356	69342	62063
	Fdxr	91715	79359	34854	32568	63213	42228	29928	41509	34392
	Ptrh2	88687	61836	52573	37722	45922	47595	35030	33179	28190
	Bola1	66160	65361	70906	57391	66374	58564	34073	35765	35288
	Ociad1	64683	65880	68767	57383	60894	62664	44945	44053	43501
	Eral1	65267	56647	75449	48943	54651	51855	30516	26794	26476
	Mtatp8;mt-Atp8	63858	75953	55699	51751	61245	58270	53040	56288	52147
	Acadvl	60837	64978	68520	55551	64993	59635	48573	47147	42278
	Pex11b	78598	65550	48068	36203	43415	40747	22116	17745	17366
	Ndufs8	72273	66762	52910	52053	49306	46795	52234	48098	42727
	Diablo	93969	87853	9678	30097	39664	59044	8830	10404	8662
	Ndufa7	56288	66922	62031	65106	69444	59998	51549	56074	51011
	Gls	66960	60211	57393	54707	56373	53515	43247	42298	40433
	Chchd3	59803	58485	65277	53145	59006	55091	38311	41969	40822
	Atp5mpl	55085	58035	69617	64131	62301	59325	48995	62431	51706
	Gfm1	93169	42555	45082	63519	74151	73368	39899	34001	21019
	Ndufb4	57858	59252	62421	58212	60708	64938	46000	65545	56451
	Sdhc	60786	66472	47896	37831	46712	47189	42456	45599	38138
	Aifm1	59734	57777	56718	46089	55362	55069	37137	37800	36648
	Timm44	64941	52197	55940	42637	47352	45392	23961	25482	22962
	Ndufb5	58903	55659	58385	51567	53584	49578	41811	40338	37548
	Ndufc2	61105	58604	53210	48571	51247	44325	43355	41093	35783
	Slc25a12	56313	57636	58338	51542	52588	53913	45222	48332	46023
	Nudt2	59113	57044	54197	34929	41725	40690	28405	24503	24245
	Ndufb3	52320	50339	67374	54902	55436	59309	45450	52037	49935
	Atad1	60626	55441	52342	43067	47784	43469	31809	27163	25690
	Timm50	57082	53657	54038	44139	51156	49724	28680	29099	27902
	Bcat2	55266	48186	60129	43445	50952	48449	26474	32523	30503
	Nrdc	42026	43952	77498	63201	76233	73683	43436	40926	39501
	Mpc2	49208	77045	36937	26441	88189	88348	67770	100179	47863
	Ndufb9	39621	66119	55727	51162	52545	53433	47608	49686	43390
	Tomm22	50300	56455	51967	30263	39314	26284	23954	22352	14667
	Pus1	57863	49268	50956	41921	47472	44284	27272	26097	25897
	Arl2	56165	50726	48148	42760	41985	27604	29171	14794	26614
	Cox7c	54426	46187	52069	48144	48142	39107	43909	36067	33769
	Samm50	49991	51541	50114	46439	51025	45924	38339	39228	33205
	Pmpca	53438	52370	45798	39209	40236	41309	27399	25387	24969
	Mrpl4	54514	51175	45235	49055	30625	50908	20277	25941	28839
	Scp2	48709	49420	49878	44008	48136	45720	52037	54146	50917
	Mrps23	52087	48017	46623	38246	43738	42603	29251	29469	27331
	Tomm70	49021	47598	49046	40083	45438	45110	31472	30114	27047
	Mrpl13	45867	49381	47979	43495	44792	44485	27654	31224	29297
	Prdx4	45745	45614	50423	65025	54295	47264	31692	28007	28590
	Cpox	49836	46083	42731	39309	42062	42265	26708	23855	23074
	Ndufb6	46321	46568	44860	44076	42227	43402	34836	41610	35678
	Mrpl41	44110	42786	49707	42757	47103	44332	25434	28645	26040
	Gatd3a	45261	46469	43597	42902	45000	43433	43776	48106	43662
	Romo1	39921	45814	49129	32966	40101	35254	18558	17641	16904
	Micos13	37400	55020	42120	34188	38288	40729	32130	32206	27750
	Mrpl11	44019	41698	48786	43179	48055	44549	26485	30183	25404
	Comt	57621	38642	37519	32359	37884	29112	19336	19022	16673
	Slirp	45820	45633	42269	35074	37664	39553	22045	25081	22624
	Coa3	39509	46381	47751	37844	42761	42346	22761	28461	24368
	Mmut	52119	52075	28903	26259	30844	43129	27508	26002	27472
	Bcl2	54180	44357	34297	28726	35005	35515	28275	30153	30386
	Hadh	46435	46154	36258	32793	35546	36183	32733	31705	28168
	Ndufs4	45014	37984	45564	43085	42366	36954	32872	33530	31899
	Mrpl23	43797	41102	42969	38014	39271	39207	26181	22578	22607
	Mrps34	44414	43408	39596	34435	38704	39149	26474	27590	25119
	Ccdc58	40069	39580	47558	37515	41047	39019	17922	19718	18767
	Mrps26	41069	46302	39735	35328	39258	38561	26169	25144	22991
	Sptlc2	39996	50403	36113	24381	30482	29164	20546	20520	15237
	Uqcr11	47508	42784	35322	29111	33198	32516	29685	23515	21654
	Higd1a	40309	50581	34671	30112	38314	37317	20478	18650	19437
	Atad3	42050	41073	42229	37234	38575	38753	21590	23411	21375
	Crot	42278	41644	39469	27217	32472	33583	24960	24262	23509
	Acot13	43342	44060	35334	31495	34809	39293	38930	34676	33074
	Plpbp	40785	39574	41903	32610	36501	34979	24873	25470	23636
	Coa7	41084	33773	46254	40964	44951	48903	38045	55255	40144
	Pitrm1	41029	39458	40053	31778	36524	34592	20141	21023	19489
	Pgam5	38970	38718	42222	34001	37515	37613	22991	26359	25983
	Trnt1	43725	39238	36939	31700	36456	35829	23338	23917	21514
	Mrps30	43851	38734	36529	30330	33823	32849	19628	20916	19675
	Htatip2	34829	40274	43625	23483	34114	28724	26191	22137	24064
	Isoc2a	45867	50750	21248	19934	25950	29120	32226	31498	23641
	Pycr2	39739	38851	39242	42414	41758	38621	31795	33436	32156
	Echs1	37767	39554	39897	32286	38081	36645	33295	35541	33644
	Apool	40958	33743	42287	39642	41772	39423	38556	39694	34804
	Tsfm	37656	36497	41403	35050	41830	39441	26718	21574	22244
	Nfu1	35119	40578	38850	27810	35856	29840	19508	18688	17863
	Mrps16	38493	37898	37120	34288	36788	38790	21657	25766	23677
	Mrpl39	40239	36671	36428	29246	34638	34045	22263	21954	20800
	Acaca	39245	37128	36665	28159	32680	32344	15494	15375	15829
	Mrpl58	37900	35987	37998	32694	36998	29015	23459	11085	22225
	Slc25a24	37868	37239	36419	20226	26641	32455	23428	24677	22637
	Mrpl40	39012	35336	33957	28749	33098	34545	19347	16734	17555
	Hccs	34546	35141	38588	28985	32865	31080	18280	19000	18357
	Clpx	32531	33519	41144	30688	31222	24760	20585	21806	16580
	Msra	62987	24211	19941	17955	29736	78782	61966	70106	55136
	Fam136a	33947	34128	38454	28873	31565	24589	15431	14806	14085
	Mrpl14	36692	36082	33113	27985	34485	33015	21112	19289	18387
	Mrpl53	36252	32155	37399	30417	33378	31972	19290	20929	18951
	Nit2	37661	35221	32202	27175	30783	29848	26210	24438	24934
	Elac2	35547	34212	35292	25795	30592	28820	16012	15317	15320
	Ndufs6	40220	32349	32284	27949	32162	27759	26673	25921	24360
	Mrps22	32235	36764	35707	31731	30101	32958	19898	21931	17740
	Mrps27	38834	34734	30203	28527	31311	28691	19821	18047	16261
	Mrpl21	36603	32514	33742	30177	31572	30989	21791	22160	21176
	Mrps36	33346	33594	35182	29185	30865	31573	19258	22192	19295
	Acad9	35305	32840	32886	29726	31311	32418	26466	26298	23848
	Pmpcb	34826	32030	33924	31326	32321	31333	19723	18033	18297
	Sdhd	33953	32687	32136	25158	30682	11135	26925	22657	19032
	Afg3l2	31009	32877	34372	27532	28217	26821	22793	28029	22468
	Mrpl49	35661	29777	31499	27377	29409	29098	17940	17050	16661
	Idh2	35812	29737	30419	30504	30437	28596	25219	25622	22423
	Dhrs1	33368	30829	30876	23997	28094	25877	24829	23329	22692
	Pdk3	27884	42592	23494	20963	35266	23735	20201	21422	21931
	Pcbd2	29468	31938	32460	30451	30542	28894	30076	32119	30965
	Pam16	29985	30748	32697	25655	30255	29838	13803	12818	14619
	Ethe1	31730	30455	31059	24964	30446	28860	18854	18819	18549
	Slc25a13	30896	31115	30933	20882	24895	25870	16120	17481	16303
	Ndufb7	28451	29599	33949	28929	31609	27021	26583	26291	24265
	Dap3	32488	27201	30525	25975	27597	27184	18919	20248	18592
	Hsd17b4	29314	30285	29907	25489	28691	28345	25296	27748	26566
	Dguok	48121	31663	8856	16851	7401	11976	12259	9861	8406
	Ndufaf2	27404	29084	32074	28412	27902	29111	16416	18740	18285
	Mrpl19	31348	29289	27693	25098	27408	24226	16392	16512	16387
	Letm1	32014	26799	29504	22801	25646	23817	20966	21230	19381
	Bnip3	28681	29162	30417	24705	30710	24326	18633	18541	16441
	Dhrs4	27487	29266	30143	27113	27495	27529	24912	24512	23659
	Ppif	34456	30016	22226	20795	25799	26221	17630	15315	14504
	Mrps6	29043	30112	26977	23040	23297	24041	12031	13785	13088
	Mrpl15	30801	28118	26593	21235	27044	28489	16318	18059	16689
	Tomm7	34535	40005	10694	9805	18879	19201	19153	8198	10678
	Dnajc11	36392	23765	24562	17580	21482	21019	12899	12402	10266
	Yme1l1	27487	27332	29702	23439	26510	25343	13519	13661	13717
	Gcat	29540	28554	26231	20953	24416	27001	20081	16832	16104
	Mrps17	29995	27484	26547	24102	24653	24844	16674	17921	17102
	Pck2	26348	29043	28276	10896	20721	20574	7263	8484	7665
	Txn2	29488	29015	25142	19990	24303	16679	16460	13428	13258
	Tbrg4	33258	25062	24896	18295	24147	22322	15137	15923	12443
	Dbt	29350	27437	26316	17240	21158	22108	15141	16458	15217
	Naxe	26570	29514	26977	21854	26572	25966	25606	24883	25689
	Mrpl9	28335	27007	27612	28800	26014	25523	15884	18969	17370
	Mrps5	29117	25442	28394	24304	26607	25528	17101	16543	16595
	Mrpl17	31644	25625	25298	21185	24320	23621	15821	15175	14681
	Tmem126a	22761	26574	33020	24566	18369	21288	14250	20153	15067
	Mrpl46	25085	27372	29699	26736	28975	28553	16129	17293	15948
	Acot9	30674	26593	24871	21860	22019	22645	31285	32776	28173
	Dnajc15	26426	25901	29725	17190	23489	24866	8772	7248	7916
	Mrpl44	26838	26030	28996	22661	24550	25491	19217	17871	14054
	Mtnd1	35461	23175	22936	20004	24005	24313	18614	19660	16637
	Nln	25409	31045	24991	17752	25972	21836	13050	6083	10348
	Auh	27082	31158	22934	20216	24590	27312	15261	16693	15930
	Mrps7	27534	24085	29388	23769	25774	22108	16742	16356	15719
	Mrpl24	27006	27513	26151	24091	26128	24212	15321	14807	14104
	Chchd4	27304	23514	29316	14415	24426	16141	12321	12762	14062
	Clpp	25960	24900	29151	24270	27419	21581	13214	13183	12986
	Mrps28	30448	22586	26347	23846	27052	24806	16049	17505	16197
	Mrps9	26337	25231	27640	25036	27567	25305	16861	17728	16354
	Bcl2l1	29050	26559	23114	20131	21236	22617	13747	11498	12793
	Ndufs7	24762	26208	27640	26657	29196	28888	18957	26348	24665
	Apoo	28636	25423	24461	21158	22068	21714	15258	13608	13431
	Cmc1	24817	26240	27334	22529	23848	21623	18333	18280	16487
	Iars2	26301	26237	25067	23222	24783	23591	18363	18947	17335
	Pdk1	28301	24744	24515	18973	22970	22971	16003	16274	16112
	Ptcd3	25236	24554	27364	24126	25173	22668	15793	16256	15187
	Rfk	26275	24763	25792	17002	23546	24401	11617	11628	10034
	Armc10	26220	24890	25384	21895	25691	23260	22149	23575	22203
	Nfs1	35121	10206	30717	13408	15994	15584	10810	11849	9887
	Ndufa1	25348	31437	18834	20107	19001	26749	20664	22699	20273
	Mrpl10	29893	26012	19116	15245	17763	17629	12738	10737	9642
	Naxd	22750	26507	24948	20944	23281	21256	14742	16191	14916
	Mecr	23310	26534	24160	19280	19607	21265	16691	16378	15511
	Fundc2	23568	25414	24404	26557	24952	22493	21863	19703	19369
	Slc25a1	24535	26245	22083	17204	20353	19805	11332	12178	11432
	Ndufa3	22969	17325	32246	26979	26964	22967	17368	15477	16276
	Agk	25327	25028	22063	19280	21522	21690	20637	18296	17422
	Mrpl45	23436	24902	23600	19425	23186	22770	14791	14676	14624
	Mrpl18	23608	22749	25576	22381	23873	22215	14806	14182	13737
	Pde12	23858	23620	24339	20302	23014	20175	13787	13956	13682
	Mrpl37	23477	23613	24026	21348	22248	20963	14706	14919	14840
	Dnaja3	23716	24011	23291	19102	21943	21382	12204	12005	12019
	Dhrs7b	24840	19877	26137	19270	22664	21130	12025	11904	11343
	Nudt9	23151	23435	24118	14107	18146	18412	7710	7504	6654
	Timm9	21658	23252	24763	23769	19443	11629	13959	13210	8077
	Timm10	33282	8789	27434	21566	28410	28999	16620	16741	17817
	Acadm	23405	23748	22052	22905	22546	23328	27580	28197	25887
	Decr1	25774	22416	20959	19499	20612	19401	20077	19824	18378
	Mrpl22	23234	21923	23794	20292	21889	21275	13117	15332	13976
	Hibadh	23122	22409	22582	19629	22003	20127	16090	17885	16662
	Tfam	22112	22501	23302	24417	22328	20725	22792	21775	19707
	Mrps15	23198	21106	22946	21308	20609	19983	14220	15384	14005
	Nipsnap3b	26847	21942	18146	15683	15080	18049	15228	13137	10572
	Ech1	23541	22911	20470	14866	17542	17911	12997	13178	12490
	Mtarc2	21683	22262	22019	21259	23417	22092	22827	21181	21092
	Ppox	25929	23627	16390	13427	15835	17784	18636	10523	9917
	Poldip2	22098	22292	21549	17466	19448	19740	10416	11114	11994
	Comtd1	25823	24586	15502	17272	20927	20384	11474	10874	10765
	Glrx5	21517	22681	20986	17082	19862	15586	11200	11469	10459
	Cox6a1	24963	27113	12989	15151	13577	16714	16365	9466	10083
	Cox20	20156	19735	25086	20663	22236	18649	15536	15351	16041
	Timm17b	20432	21403	22933	24175	23707	22528	16139	18481	17626
	Mrpl20	24363	21644	18555	16171	17481	17630	12291	11259	10328
	Pycr1	21253	19653	22894	21125	23713	19710	15323	15961	16394
	Mrpl50	19423	20667	23343	19655	22224	17427	10147	10373	9376
	Mrps24	22321	18882	22171	17426	19251	16686	12015	12496	11343
	Cox17	20370	21296	21409	15755	16115	8231	6843	6566	5768
	Slc25a10	19468	22764	20842	18479	21181	22391	15280	18108	14880
	Hmgcl	22849	20307	19875	16054	20672	15578	15954	14975	14147
	Mrps21	19803	19265	23824	21351	21779	20285	13824	15629	14986
	Mrps2	22158	19977	20194	16988	15815	17927	11415	11783	11405
	Plgrkt	21285	20364	20180	15832	18567	18453	20959	23307	19468
	Guk1	22936	19675	18558	17439	16102	15462	17000	12086	12705
	Zadh2	23409	17987	19610	19206	18384	23215	19882	18692	17958
	Hibch	19095	24021	16973	17030	19136	23093	16695	14995	15648
	Hsdl2	21484	19284	18490	15405	17102	16553	16709	17990	16784
	Yars2	19683	23186	16244	14581	23720	25356	15932	13839	17245
	Lactb2	21550	18982	17953	15136	17109	15573	13065	11839	12507
	Mrps25	22340	17236	18463	35234	16893	15803	9192	12894	10194
	Pccb	12580	26339	18883	18294	21290	20362	13937	10423	9235
	Coq6	14398	24657	18379	51606	42390	20819	7082	52694	59798
	Golph3	20135	19031	17620	15514	15737	14076	10813	9251	9545
	Ppa2	20318	16178	18918	18626	17365	15534	14891	14365	13893
	Dhx30	19343	17913	17852	14251	16112	15959	9056	9081	8738
	Pnpt1	18316	18616	17610	14339	16083	14775	9946	11775	10718
	Bcl2l13	17955	17484	19073	15073	17303	14015	10611	9180	10484
	Nif3l1	21269	17098	15963	14137	15501	13904	11988	10961	9898
	Mrps31	18842	19387	16080	13394	14933	15342	9821	8674	8073
	Mrpl33	18420	17350	17265	14192	16946	14857	9324	8762	8890
	Mrpl1	17524	16411	18614	16465	17978	19020	12937	10554	9520
	Cmc2	17933	17635	16521	13094	13707	11403	12902	12466	11074
	Rars2	20349	16711	14887	18133	13216	13870	8954	14334	8517
	Mrps18b	14447	16898	20225	15607	17438	16607	9086	9669	9559
	Yrdc	16686	15787	18571	12130	27037	13976	9166	6673	5259
	Fdx1	15527	19148	16362	10194	14298	15535	7426	6368	7130
	Slc25a32	15999	19234	15117	11153	12257	5729	11452	4833	9666
	Mrrf	22151	13730	14446	12345	15973	13422	6661	8275	7584
	Aldh3a2	17110	15939	17170	13099	16235	14797	13895	15422	13454
	Rida	17460	15923	16815	15876	13954	14583	11876	10080	15190
	Mrpl54	20393	18719	10722	15591	14064	14492	10271	8988	8396
	Mrpl38	16809	16880	15896	14323	15208	14890	9408	10728	10027
	Sfxn3	16714	17751	14997	17245	17352	16181	26406	29963	26749
	Timm17a	15314	17235	16869	11933	12527	13187	5870	6143	5493
	Trmt10c	15162	16027	17966	14520	16584	13097	9960	10147	9647
	Timm29	21559	22021	5218	4708	4834	4315	3366	3706	3261
	Mtch1	16049	17797	14826	14584	15918	16787	11061	15432	13602
	Etfdh	16437	14803	17006	14153	15689	13202	14002	14178	13370
	Ivd	15900	16824	15302	13027	14928	13571	11759	12188	11180
	Nit1	21168	14123	12712	10549	11433	12886	12226	8875	9575
	Taco1	16536	16683	14776	12874	14836	13836	11680	10176	9863
	Abcb7	16583	15654	15383	12395	14599	14507	10298	10990	8741
	Rhot2	16754	16253	14207	12199	14061	14795	10490	10103	9047
	Dhodh	15703	15949	15518	13358	14737	14305	8417	8584	8282
	Tfb1m	16439	15479	15193	12152	12053	12895	8043	7372	7611
	Abcb8	17054	14514	15196	11605	12657	13008	7741	8304	8038
	Tmem11	16254	15268	14906	13035	14498	13421	10247	10717	9659
	Nipsnap1	9747	24410	12166	13711	12509	11621	12951	14263	13430
	Lias	14681	14237	16529	12710	15160	15621	7760	8025	3399
	Ghitm	13265	14605	17511	14826	15952	15325	10310	12996	11596
	Mrps18a	15945	13756	15344	13243	14452	13200	8868	9180	8690
	Hsd17b8	15480	15061	14458	14302	15247	14606	13101	15382	13926
	Mavs	15895	14409	14670	12745	14211	13349	11363	11886	11541
	Slc25a20	13558	15992	15017	11374	13010	12189	10422	11197	9265
	Mrpl55	18723	10707	15127	12762	89866	11646	6565	8570	7520
	Mrpl3	14982	15598	13730	12024	12907	12676	8703	8465	7959
	Acsf2	15006	15367	13819	11231	16220	15249	20646	21048	20495
	Isca2	13357	13999	16829	12538	15230	14421	11493	9664	9155
	Tomm20	12767	17120	14262	10724	12715	13455	5967	5797	6191
	Snap29	14580	13433	15699	10783	12722	12137	9891	10348	10400
	Endog	14774	15199	13493	11451	12383	12567	7416	8379	7417
	Lyrm4	15919	14710	12752	11201	12203	12493	10951	9809	9279
	Mrpl34	14334	13582	14598	14418	15305	15292	9746	9302	10078
	Timm8a1	19763	11096	11566	9629	10869	5489	10305	6731	3002
	Dnajc19	12464	15127	14697	13861	14353	13661	12143	12199	11932
	Mtx2	16173	12752	13299	9917	10889	11250	9135	9674	8466
	Akr1b10	12170	12529	17232	13900	17404	10734	8522	9423	8481
	Mrpl47	13688	12563	15559	15967	13529	12333	19220	12202	9325
	Flad1	14842	12897	13518	9488	11299	10597	8350	7252	7002
	Hint2	13905	14448	12871	9970	13150	11071	10034	11488	10487
	Marchf5	14591	14044	12128	7735	10228	9031	5873	5954	5353
	Rmdn3	13994	13088	13674	10852	12628	11474	5771	5775	4892
	Ptpmt1	15406	13892	10456	6520	9556	9579	4812	4450	4223
	Surf1	12359	12712	13988	11843	13439	12215	7057	7749	7000
	Mrpl16	13152	13152	11950	11002	11944	11566	7976	7404	6860
	Mrpl2	12237	12772	12960	11203	12437	11006	7967	7942	7388
	Ptcd2	13390	12787	11542	9689	10252	12898	7472	7870	7931
	Bid	14397	11676	11604	12029	11829	10932	9437	8120	7184
	Opa1	13242	12582	11288	9745	11030	10891	8576	8701	8146
	Mrps35	13065	12872	10893	9313	10964	10628	7500	8218	7389
	Gstk1	13837	11762	11148	8234	11092	10075	14404	12534	11828
	Atp5pf	11854	11816	13051	12542	10401	8169	14178	16378	9401
	Mrpl32	12005	11098	13521	10141	11017	9263	6582	5004	5831
	Cox7a2	13107	11928	11579	9412	9601	8375	11563	10676	11217
	Mrpl27	11644	11193	13704	11537	12782	11938	7659	7272	7272
	Coasy	12752	11981	11521	8902	10458	11208	7768	8063	7593
	Timm8b	11508	12292	11834	7957	11084	4180	3372	3330	1757
	Gls	11814	11290	12461	11663	12001	10757	8006	7708	7896
	Hdhd5	11806	12533	10799	11729	13431	12972	16207	16382	13785
	Gadd45gip1	10019	10784	14229	12669	12795	12226	6147	6216	8536
	Tomm6	16285	8094	10653	12584	5432	8599	2990	5287	5254
	Echdc1	11984	11831	9999	8481	9959	9742	6963	6231	5483
	Akr7a2	11078	11136	11350	9794	10652	10044	6571	7075	6625
	Mtpap	12880	10298	10143	9244	10363	11106	7112	6671	6950
	Bcs1l	15119	8245	9809	8949	9507	10256	6425	5945	5698
	Slc25a22	11229	10106	11536	10103	11162	10009	6394	7518	6892
	Mtco1;mt-Co1	12146	11810	8722	8678	7856	7051	7593	6154	5410
	Rmdn1	12782	10103	9778	7514	8324	8225	6796	5858	5730
	Aldh7a1	11198	10501	10619	6506	9490	8908	3593	3232	3145
	Dmac1	16048	8684	7453	2957	1291	12539	8206	9474	7743
	Qtrt1	9840	10607	11699	9243	10908	10366	5115	6205	5635
	Dcakd	12071	10589	8968	7499	8358	8336	7760	7062	6205
	Micos10	7457	12797	11243	7482	6523	4054	5600	3135	2883
	Dmac2	9500	10141	11834	5833	9938	9800	4010	5237	5434
	Grsf1	10671	10389	10001	8227	9531	9302	4110	4191	4313
	Clpb	9982	11148	9789	8457	5893	6397	6517	3322	3524
	Thg1l	10498	9597	10619	7832	9012	9097	5598	5297	5423
	Cox7b	10062	8273	12299	11940	6398	7236	7335	7960	6886
	Spryd4	12887	7153	10582	5975	9945	9391	7215	6459	6095
	Hsdl1	11450	9540	9068	9009	9707	9170	10266	10376	9578
	Tstd3	11176	9877	8959	6067	7989	7800	4100	4147	3838
	Pcca	9881	9638	10208	12122	8241	8663	6553	8909	6913
	Hscb	9682	9019	10724	9174	10374	8415	7542	6772	6059
	Acadsb	9375	13779	6109	7125	10830	8703	5195	4759	3998
	Mrpl30	9009	10446	9514	8416	9357	9456	5716	5814	5735
	Mpc1	9262	7928	11665	10809	9909	9225	8079	8966	8415
	Coa6	10975	8144	9570	8768	9384	9636	6863	5574	6185
	Cpt2	9376	10481	8819	8143	11020	8675	9663	8294	6672
	Timmdc1	9710	10288	8554	6454	7568	8225	4236	3969	3750
	Mrpl51	9963	9910	8652	8167	8756	9009	6469	5707	5385
	Prkaca	10040	9283	9157	8131	8036	8433	8302	7680	7836
	Afg3l1	10352	8763	9051	7159	7822	7289	4396	4133	3978
	Txnrd2	10149	8874	8984	7550	7430	8221	5092	5254	5466
	Fxn	9289	10453	8262	7571	6797	6670	4918	4628	5203
	Atpaf2	9785	9703	8446	8294	10228	8865	7338	7334	6611
	Fam210a	10359	8658	8793	5955	7295	7260	5544	4749	4513
	Stx17	9422	6701	11466	12267	14679	15519	6005	5721	10411
	Cbr4	9279	9323	8982	7977	9212	8977	8842	9156	7972
	Mrpl57	9594	8856	9088	17214	18970	14453	5211	4385	5433
	Fdx2	10675	8123	8667	5874	7660	6689	2806	2971	3041
	Ndufaf1	6852	11197	9368	9387	9589	6883	7527	5881	7139
	Mrs2	11143	11173	4805	1890	7310	9572	7276	8803	7886
	Agpat4	5685	3615	17696	3012	3816	3973	2489	8800	9580
	Mrps33	8122	7582	11262	10349	10048	10029	5572	7371	7324
	Acot2	9621	10433	6865	6065	7536	7341	7839	7620	7186
	Gcdh	9055	9432	8113	6116	8850	8322	6067	5735	4777
	Nme3	9527	8586	8454	7640	7964	7724	8857	9807	8781
	Mtg2	12235	8537	5717	5054	6409	5629	5645	5089	3105
	Ndufaf4	8764	9298	8339	7209	4611	4392	4327	4462	3824
	Chchd6	17751	3824	4433	3910	22661	3711	1827	2365	1993
	Pdhx	8686	8768	8223	6419	7525	7304	5353	5577	5249
	Dna2	7902	10383	7295	5579	7005	6732	3936	3087	3575
	Eci2	7212	9793	8513	6293	5717	6666	4816	6725	6248
	Kyat3	7870	8429	9154	5536	7700	7209	3408	3839	3504
	Cox16	8171	7888	9385	7714	7932	7807	4457	5966	5494
	Sars2	7681	8960	8738	8455	8256	9017	7465	8188	7276
	Mff	8484	7812	8726	6425	7601	7012	6420	6791	6836
	Macrod1	7902	9329	7759	4703	8328	5132	5129	6071	5857
	Gfm2	8358	8060	8571	5266	7419	6935	4382	4223	4313
	Supv3l1	8986	7611	8130	7552	7647	7809	4186	4372	4380
	Mcl1	8040	7327	8866	6179	7973	7289	3970	4129	4325
	Chchd1	7311	8093	8468	7686	8226	8069	4924	5248	5524
	Sco2	8561	6970	7629	5914	7495	6758	4355	4483	4498
	Tspo	8826	8688	5553	5144	3391	5004	6815	6075	5538
	Lactb	7542	7866	7162	5586	6703	6673	6280	6313	5699
	Mrps14	7065	7126	8213	7599	8237	7670	4804	5523	5189
	Cox7a2l	6962	7920	7472	5941	6629	6660	3490	3361	3244
	Uqcc2	4392	8504	9327	7443	7968	7493	4882	3668	5004
	Mrm1	5265	6895	9747	10831	9383	8626	3599	11811	11512
	Maip1	9790	6199	5894	4717	5302	5031	3872	3532	3175
	Gcsh	6593	8244	6773	3744	5752	5059	2188	2115	1783
	Abcd1	7871	6280	7358	6830	7679	6465	5160	6067	6059
	Htra2	6905	7212	7292	7379	8024	7358	4135	3983	3669
	Ndufaf3	6567	6937	7662	6270	5857	6692	3531	4166	4209
	Ak4	6794	6928	7345	4870	6366	6078	2758	2123	2986
	Pank2	6854	6934	7260	5537	5838	6278	4380	3934	3969
	Guf1	5351	8269	7260	7976	4359	6486	6116	3513	3421
	Cisd3	5965	6704	8191	2103	3991	3223	2182	2676	2531
	Exog	11422	4923	4192	4462	4615	4646	3932	4120	3530
	Gstz1	10107	3817	6124	6684	6130	3795	3000	2776	2463
	Hars2	6512	7113	6132	5697	6724	5995	6008	5674	5350
	Uqcc1	7485	6118	6107	5192	5577	5183	3695	4020	3523
	Bola3	5948	6814	6942	4249	4574	4527	3656	3333	2869
	Abhd11	7973	6734	4957	4685	4894	5078	4367	4148	3652
	Angel2	5205	8509	5738	4966	4994	6379	4600	3724	3549
	Oxa1l	6010	5958	7409	5909	6435	6404	3903	3967	3575
	Mrpl48	7170	6000	6091	5435	6521	5761	3850	4137	3662
	Polb	6544	7552	5094	4332	3714	4373	3246	3586	2770
	Rhot1	6930	5816	6227	5074	5893	5042	4021	3879	3820
	Ldhb	6847	6171	5835	4719	5920	6346	5423	4226	3815
	Bloc1s1	5836	5571	7431	6112	7409	6139	4751	4907	4583
	Mtg1	6586	5771	6348	6127	4985	6410	4284	3407	3307
	Trmt1	6642	5717	6252	4789	5520	4824	2817	2718	2780
	Antkmt	6977	5449	5921	5490	6581	5147	3234	2817	2958
	Mtnd4;mt-Nd4	5379	8076	4849	7255	5251	4597	3622	4096	4367
	Mthfs	7042	6676	4579	4171	5018	4683	4897	3493	4263
	Mrps18c	6255	6442	5598	4630	4976	5619	3559	3933	3163
	Dglucy	6707	6327	5223	5478	6456	5942	2954	3443	3266
	Timm21	4799	5015	8183	23055	4643	8949	6320	11429	6461
	Pisd	6070	6008	5535	4100	4910	4885	2705	2660	2519
	Rab24	5606	5698	6295	4908	6398	5783	4634	4081	3990
	Pusl1	6513	5015	6069	4580	4802	5155	3341	2774	2722
	Akap10	7917	7214	2431	1504	2547	2725	1456	1986	1596
	Timm22	5783	4926	6502	5672	5832	5179	3964	4317	3696
	Slc25a19	4906	4850	7429	5266	5827	4172	2455	2240	2257
	Clybl	5656	4871	6631	6425	7136	6801	7258	5873	6126
	Cox15	5956	5768	5410	4475	4793	5381	2987	3191	2627
	Tars2	5834	5618	5303	5532	5594	5740	3897	4110	3819
	Mrpl28	5551	6825	4113	4417	4263	5775	3653	4087	3746
	Gfer	5372	5179	5812	4078	4957	4719	2491	2293	2286
	Pgs1	6087	5446	4510	4567	4731	4555	3165	2504	2566
	Pxmp4	7089	5350	3552	3555	3847	3797	4986	4963	4270
	Coq5	3383	4911	7560	4121	5805	3373	2346	3617	1930
	Pnpo	4813	5365	5652	4126	4193	4410	2940	3559	3281
	Rdh13	5315	4421	6058	4779	5291	4623	3183	2874	3105
	Ecsit	5841	5234	4640	5193	5369	6039	4252	4228	3868
	Acsf3	5239	5277	5145	4611	4911	4589	3380	3171	2880
	Bcl2l11	5186	5063	5396	4816	5481	5929	13754	13875	12964
	Ahcyl1	5615	5870	4146	5557	5385	4425	3891	2008	2621
	Ndufaf7	5835	5489	4253	3634	4503	4457	3414	3337	3198
	Bckdk	6703	4480	4288	4307	4702	3882	3903	3196	3012
	Aldh2	9938	2705	2508	3016	2987	2996	2384	2321	2445
	Fkbp8	4253	5300	5543	3461	4449	4071	1992	2245	2355
	Dus2	5027	5185	4725	2766	4496	4108	1823	1813	2299
	Ccdc51	4913	4891	5019	3886	4213	3808	3096	3033	2751
	Aars2	5688	1218	7856	5462	716	7049	580	567	540
	Mcu	6072	4569	4055	3779	3671	4042	3534	2393	2464
	Ndufb8	4846	5141	4511	4963	5759	3844	5429	4038	3606
	Dcxr	5361	4523	4526	2842	3597	53204	1363	1396	1458
	Cebpzos	5560	4132	4717	4123	4555	4528	3132	2787	2935
	Slc25a15	4676	4579	4680	3797	4522	3988	2769	3074	2577
	Parl	4957	4493	4160	2883	3508	3515	2981	2080	1913
	Mtnd5;mt-Nd5	6111	4883	2565	3094	2451	2862	2510	2351	2061
	Xpnpep3	5225	4501	3681	3212	3607	3706	2709	2518	2590
	Slc25a53	4039	4551	4742	4227	4500	4382	3097	3237	3286
	Acad8	4897	4551	3554	4935	4843	4770	4423	5089	4473
	Mipep	4491	4003	4435	3428	4410	4644	3855	4489	3046
	Hint3	4949	4625	3245	1812	2124	3446	3375	2756	2838
	Suox	4214	4461	4030	3647	4333	4336	2879	3137	3211
	Mtfr1l	4078	4650	3962	3190	3886	4072	3350	3345	3278
	Slc25a51	3516	5001	4088	3952	3072	4260	4222	3576	3463
	Tmem70	3774	4142	4631	3363	4333	4031	1470	2525	2165
	Aldh4a1	3640	4658	4235	3703	4381	4231	3405	3657	3473
	Tefm	5578	3838	3064	3970	3635	3469	3067	2602	2487
	Hagh	5023	3698	3745	3062	2891	3361	3077	2293	2783
	Mgst3	5109	4263	2989	2169	2484	2620	2869	2409	1800
	Abhd10	5099	3186	3998	3111	3625	3550	2643	2506	2260
	Ptges2	4532	3902	3690	3245	3737	3763	2929	2572	2441
	Mt-Cyb	4397	4048	3651	2932	3112	2879	2428	2267	1911
	Fastkd2	3926	3628	4393	3348	3825	3658	2596	2241	2009
	Sdhaf2	4644	3366	3830	3671	2696	1493	1709	1294	715
	Cpt1a	3758	3997	4047	4360	4263	3696	3804	4197	3776
	Acp6	4766	3457	3575	3816	3918	3688	3213	3035	3107
	Agpat5	4001	4232	3529	2751	3054	3591	2154	2379	2134
	Mtnd2;mt-Nd2	4269	4138	3264	3451	3138	2770	2664	2371	2111
	Tmem126b	4048	3834	3782	3458	3605	3356	2622	2461	1353
	Glrx2	3833	3430	4215	2878	2996	3279	1775	1909	1311
	Mtif3	4744	3197	3431	3296	3559	3428	2271	885	1994
	Chchd7	3496	3873	3800	3464	3412	3350	2724	2708	2956
	Fmc1	3467	3386	4315	4214	4283	3767	2282	3107	2886
	Mlycd	4584	3527	3020	2514	3224	2688	2659	2180	1980
	Pdp1	4141	2887	4092	1974	2161	2216	2892	1918	1517
	Oxsm	2530	3311	5149	4910	4478	4996	5253	4261	2971
	Nadk2	4186	3812	2980	3313	3622	3310	2475	2528	2000
	Pet117	3973	3032	3660	3207	3313	2561	1791	1807	1528
	Fundc1	2506	3855	4087	3045	3386	2901	2491	1984	1990
	Pdpr	4006	4558	1744	2383	2927	3228	2101	2382	2225
	Rab5if	3519	3985	2754	2101	2748	2805	2137	1690	2076
	Mccc2	2912	3686	3446	3099	3488	2771	2884	2569	2257
	Prxl2a	3603	3195	3031	1798	2507	2604	1810	1531	1339
	Akap1	3751	3132	2938	2304	2364	2068	1033	545	896
	Coq7	3523	3190	2899	2828	2867	2471	2064	1706	1441
	Spg7	2475	2320	4773	1666	1743	1676	3669	1067	3273
	Iba57	3285	3269	2938	3006	2687	2631	2332	1953	1849
	Acss1	3468	2107	3640	4409	4324	3649	6986	6653	7051
	Mcat	3393	2815	2972	2177	2849	2473	1782	1954	1706
	Smim26	2119	2778	4065	1857	2061	1759	1021	984	917
	Ddx28	3136	3149	2675	2271	3058	2856	1835	1393	1328
	Pars2	3302	3204	2243	2523	2725	2555	2954	2613	2306
	Cryz	3350	3285	2090	1944	3122	3219	1529	1132	1359
	Nars2	2800	2721	3095	2671	3012	2596	1408	1565	1337
	Pdp2	2831	2908	2689	2336	2998	2648	1429	1408	1165
	Eri3	3025	3117	2267	3174	3521	2927	2863	2558	2296
	Dnaja3	3288	2300	2812	1529	1943	1781	1467	974	1200
	Nudt19	3102	2891	2276	1657	2173	2087	1372	1140	1106
	Mrpl42	2919	2323	2831	2108	2506	2130	1542	1538	1391
	Iscu	2297	2527	3211	2820	2932	2663	1624	1947	1855
	Coq9	2290	3161	2492	2142	2753	2150	1790	1576	1362
	Mccc1	2262	3190	2451	1900	1987	2426	1280	1659	1459
	Aurkaip1	2210	2689	2886	2881	2708	2677	1868	1839	1921
	Isca1	2607	2161	2836	2099	2466	2214	1499	1109	1195
	Sphk2	3006	2407	2162	1552	1921	2020	1658	1529	1460
	Slc25a40	2561	2464	2423	1685	2065	1988	1473	1640	1395
	Casp9	3328	2016	2007	1625	1865	2361	1292	1408	1410
	Mtnd3	2437	2426	2469	2369	2581	2483	2782	1581	2848
	Abcd3	2456	2600	2206	1766	2165	2191	1750	1641	1568
	Ndufab1	2969	2655	1322	1191	1947	922	962	792	530
	Ehhadh	2579	2144	2085	1462	1848	1722	1372	1328	1330
	Mars2	2810	1922	1951	1654	1874	1862	1022	978	867
	Ndufaf5	2671	1715	2260	1846	1699	1293	1275	1421	1286
	Coq3	2284	1968	2290	2077	2277	2116	1312	1348	1338
	Sco1	2373	2541	1612	1261	1929	2360	1366	1570	1471
	Acsl1	2205	1919	2288	1524	1921	1985	986	1056	854
	Adck1	3130	1638	1471	1013	1286	1292	1133	1065	1192
	Vwa8	1963	2141	2114	1520	2004	1825	1294	1044	1171
	Mtif2	2418	1604	2189	1869	2124	2016	1771	1843	1647
	Dnm1l	2352	2177	1584	1652	1946	2026	1257	1096	1147
	Slc25a30	2149	2029	1842	1633	1900	1902	1121	997	916
	Mrm3	1954	1567	2327	1965	2196	1854	1090	1251	1225
	Mmab	1579	1886	2347	1734	1938	1797	1212	1373	1276
	Trmu	2482	1726	1595	1438	1455	1502	1013	919	759
	Chchd10	1754	2286	1730	1414	1922	1646	555	464	320
	Oxnad1	2168	1968	1608	1805	1689	1883	1379	1161	1148
	Mgme1	1982	1937	1793	1403	1736	1665	1024	865	861
	Sirt5	2984	1299	1384	967	1173	2534	640	1453	594
	Mtatp6	2457	1731	1416	1343	931	1183	1583	1247	916
	Polrmt	4203	485	582	572	544	570	256	352	192
	Hdhd3	2370	1258	1626	1108	1275	1071	676	595	609
	Pet100	1767	1594	1884	1648	1651	1599	1354	1504	1372
	Rpusd4	1758	1819	1621	1484	1684	1779	1271	1024	963
	Letmd1	1926	1969	1199	1914	1338	1807	1393	1649	1163
	Opa3	1421	1861	1805	1559	1698	1650	1206	1419	1055
	Coa5	2429	2323	301	493	979	1088	1165	688	0
	mt-Co3	1664	1633	1745	1665	1701	1450	1434	1367	1324
	Mpv17	3459	844	687	708	1181	525	1083	870	310
	Vars2	1994	1698	1257	1359	1595	1352	1179	1226	1165
	Nt5dc3	1623	1883	1395	1081	1261	1266	689	624	672
	Gtpbp10	2086	1599	1175	1212	1331	1275	977	876	887
	Noa1	1264	1735	1845	2195	3110	2454	1384	1586	1435
	Cars2	2028	1961	767	1315	1298	1373	849	820	760
	Pptc7	1454	1403	1834	1523	1704	1420	1555	1635	1491
	Rdh14	1839	1567	1235	1059	1126	1289	1246	1300	1133
	Acot11	1703	1450	1426	777	1028	1236	1053	1075	941
	Qrsl1	1455	1559	1512	1131	1294	1238	826	1102	982
	Cdk5rap1	1700	1360	1322	1127	1171	1066	887	752	746
	Aldh1b1	1128	1586	1575	1182	1492	1313	1151	1318	1191
	Sirt3	2931	1171	136	148	550	1052	1002	422	375
	Lyrm7	1633	1369	1203	1138	1241	1243	949	890	940
	Mfn1	1501	1271	1386	986	1159	1229	776	916	803
	Selenoo	1320	1498	1299	1169	1256	1449	1425	1512	1480
	Lars2	1590	1538	967	1013	1091	820	948	903	695
	Dnlz	1366	1197	1464	1227	1417	1172	673	1748	796
	Dars2	1256	1181	1413	1785	1563	1223	1384	1450	1461
	Bphl	1290	1224	1198	1267	1060	984	945	1127	1119
	Micu2	1218	1028	1413	1226	3734	1258	923	972	692
	Fars2	1506	1341	718	836	1082	1022	890	762	646
	Mff	932	1424	1029	730	1727	841	762	0	112
	Guk1	1407	1191	785	495	799	875	419	411	419
	Ogg1	808	924	1543	1107	671	1234	852	972	870
	Alkbh7	1311	1031	880	715	825	806	560	567	559
	Atp5mc2;Atp5mc3;Atp5mc1	2081	823	278	810	63	169	164	0	83
	Mpv17l2	1030	1003	1082	707	939	828	524	408	326
	Mrps12	969	979	1129	658	985	783	478	617	565
	Ndufaf6	1047	1066	925	775	949	871	553	602	639
	Gpt2	1032	995	995	675	790	649	206	278	148
	Mtfr2	997	873	1151	942	962	938	689	711	712
	Grpel2	1130	945	752	576	629	629	246	232	234
	Mfn2	1050	954	805	666	846	966	740	679	541
	Plscr3	1340	792	598	511	698	732	646	425	724
	Gatm	1110	476	1107	589	957	474	86	85	106
	Nubpl	1213	769	695	686	1093	639	734	697	532
	Sdhaf1	962	813	839	768	898	752	603	591	515
	Gpam	963	849	793	612	694	675	409	420	300
	Mief1	1291	733	525	203	779	646	670	379	161
	Naxd	681	827	931	762	870	750	576	647	560
	Gatb	1259	0	1138	0	1732	1199	441	1016	480
	Pdf	762	727	829	653	722	720	367	353	373
	Rtn4ip1	953	1053	311	464	518	942	462	457	462
		1259	0	992	1122	1201	1219	793	888	914
	Fastkd5	1145	563	516	497	617	562	407	342	270
	Abcb10	640	742	838	1011	686	629	698	503	477
	Rbfa	612	676	904	768	710	516	372	439	470
	Wars2	630	934	625	508	662	785	583	705	605
	Cmpk2	923	266	972	1303	1173	1050	980	1460	1337
	Ccdc127	0	793	1343	1012	664	645	531	515	581
	Ears2	1175	579	349	230	324	302	447	208	336
	Mcee	649	818	617	0	548	626	353	541	460
	Mettl15	678	696	692	630	666	645	427	479	465
	Ung	374	651	1035	1240	1008	1009	718	1033	992
	Chchd5	553	685	807	522	680	434	0	133	195
	Cry1	747	605	540	395	468	322	289	270	270
	Mmadhc	525	587	670	378	456	430	141	107	143
	Tmlhe	775	864	116	52194	61047	66723	464	386	527
	L2hgdh	621	583	442	379	390	454	289	232	241
	Immt	465	523	657	591	538	600	370	476	432
	Lipt1	546	525	521	439	529	467	308	343	312
	Trub2	760	405	380	345	408	392	276	191	198
	Fpgs	774	281	467	378	472	506	191	204	216
	Fam185a	664	289	560	297	601	470	199	177	106
	Prorp	570	549	320	264	275	349	185	208	207
	Oxr1	483	524	374	290	382	446	369	356	350
	Mettl5	646	395	315	285	361	407	191	199	197
	Mtres1	415	414	505	412	444	688	671	256	275
	Acad11	468	459	374	262	401	402	310	299	277
	Bckdhb	776	155	368	332	417	543	477	392	332
	Recql4	265	680	340	260	293	256	204	156	156
	Ptcd1	486	410	381	308	324	339	171	198	188
	Top3a	374	470	420	362	351	318	213	163	194
	Gtpbp3	535	344	367	307	277	273	247	228	192
	Cox11	359	320	488	316	375	261	211	181	199
	Slc25a35	575	337	254	162	264	210	331	334	233
	Crls1	353	346	456	308	347	321	150	200	166
	Them4	420	304	341	258	283	222	271	336	276
	Hpdl	255	395	385	185	219	492	273	422	137
	Pnkd	294	317	366	347	275	286	230	218	224
	Hemk1	387	360	230	212	206	202	104	55	33
	Slc25a42	476	238	246	314	336	206	299	178	171
	Oma1	225	431	296	328	326	372	305	272	234
	Ccsmst1	458	0	481	448	365	443	403	162	401
	Ucp3;Ucp2	554	308	58	156	218	189	252	211	35
	Bnip3l	0	0	859	727	851	792	662	597	645
	Coa8	232	449	58	107	148	362	186	284	186
	Lyrm9	204	224	285	0	229	0	0	100	0
	Ndufv3	628	0	64	193	354	73	388	625	325
	Phyh	242	174	251	171	186	155	162	164	171
	Sfxn2	305	208	149	189	218	68	246	245	163
	Cox10	185	165	264	272	204	228	85	173	147
	Usp30	296	304	0	209	286	290	172	221	187
	Coq2	206	193	201	186	190	184	96	91	87
	Malsu1	89	192	219	349	139	65	34	38	18
	Exd2	238	128	119	84	106	95	128	125	116
	Nbr1	128	151	144	67	103	95	27	24	25
	Rmnd1	137	136	125	106	121	102	99	138	106
	Higd2a	314	73	0	60	0	45	55	0	20
	Nudt8	143	189	0	0	0	0	92	188	92
	Acad10	135	96	88	109	83	69	183	179	158
	Mtrf1	0	195	98	59	73	92	28	34	35
	Adck5	90	113	54	52	110	67	68	68	51
	Pdss1	107	85	58	60	59	66	40	21	22
	Foxred1	0	0	224	138	203	157	85	118	86
	Rpusd3	137	53	30	14	40	60	28	44	37
	Afg1l	68	101	37	30	48	88	63	117	80
	Nlrx1	83	60	33	22	40	43	41	35	30
	Cbr3	0	62	91	69	87	79	238	446	212
	Bad	12	24	48	34	35	26	21	27	18
	Miga1	49	0	0	0	0	0	0	0	4
	Cps1	7	5	7	6	6	5	6	4	5
	Slc25a45	0	0	0	28	0	0	47	107	80
