# Supplementary material for: PIM kinase control of CD8 T cell protein synthesis and cell trafficking
Source: eLife. 2025 May 13;13:RP98622. doi: 10.7554/eLife.98622 (PMC12074636; doi:10.7554/eLife.98622)
Supplement: Figure 4—figure supplement 2—source data 1. [file elife-98622-fig4-figsupp2-data1.xlsx]

## Sheet: 4S2A
	CD8 T cell number
	DMSO			AZD1208			PIM447				dotted line for cell number pre-treament = 14230905
	39571165	40556727	39233938	31008234	31760354	30494233	30925323	30076336	27423085

## Sheet: 4S2C
	Protein content (µg / million cells)
	DMSO			AZD1208			PIM447
	46.96	44.03	52.2	45.63	39.25	40.01	41.35	38.25	39.66

## Sheet: 4S2D
	Estimated protein copies per cell
	Gene name	DMSO			PIM447			AZD1208
	Scd2;Scd3;Scd1	47663	40346	56027	14100	12248	10671	18473	11313	15075
	Slc2a1	45059	43378	53660	21115	25798	7087	31126	8678	24177
	Slc2a3	3657	4050	4573	1878	2295	1834	2127	1565	1632
	Gzmb	12675500	13279100	14706700	8536510	8948180	9208410	10203300	9555320	10245000

## Sheet: 4S2F
	Estimated protein copies per cell
	Gene name	DMSO			PIM447			AZD1208
	Pdcd4	26107	15644	11277	105988	77840	85583	104381	63138	84008
