# Supplementary material for: PIM kinase control of CD8 T cell protein synthesis and cell trafficking
Source: eLife. 2025 May 13;13:RP98622. doi: 10.7554/eLife.98622 (PMC12074636; doi:10.7554/eLife.98622)
Supplement: Figure 4—source data 1. [file elife-98622-fig4-data1.xlsx]

## Sheet: 4A
	Protein content (µg / million cells)
	WT	PimdKO
	75.94	56.61
	74.6	65.61
	73.73	64.22

## Sheet: 4B
	Gene Name	IL2_dKO_v_WT_log2FC_all_prot	IL2_dKO_v_WT_-log10_p.val.unadjusted_all_prot	IL2_dKO_v_WT_-log10_p.val.unadjusted_DE_prot (FC>1.5, q<0.05)		dotted line qvalue = 0.05 at unadjusted p-value = 1
	Prf1	-1.68096	1.96464
	Gzmb	-0.789675	1.83024
	Il2ra	-0.353768	1.54088
	Gzmc	-1.6343	2.1266
	Gzma	-0.777871	1.51153
	Tnfrsf9	-0.795605	1.92552
	Fosl2	-0.781393	1.74507
	Lmna	-0.887188	1.48471
	Il12rb1	-0.426812	1.28869
	Asns	-0.793433	1.78307
	Sqstm1	-0.814726	2.30964
	Slc38a2	-0.524319	2.23979
	Slc3a2	-0.455033	2.26411
	Bcat1	-0.495478	1.63551
	Mafg	-0.10714	0.581928
	Mt2	-0.973496	1.39082
	Mt1	-0.88734	1.43438
	Gzme	-2.48427	1.81586
	Scd2	-0.646196	2.37321
	Capg	-0.492538	1.78456
	Tfrc	-0.149047	1.09816
	Smg5	-0.781983	2.97602
	Cpeb4	-0.988838	2.13546
	Mvd	-0.486143	1.94732
	Ifitm3	-0.521893	1.54039
	Hyou1	-0.384138	2.00323
	Capn2	-0.556219	2.12725
	Serpinb9	-0.601597	2.04424
	Sypl1	-0.25639	1.11045
	Adam19	-0.374471	1.51245
	Atp2a2	-0.321486	1.75352
	C3	-0.635155	1.4158
	Hsp90b1	-0.325019	1.55635
	Fth1	-0.73115	2.24732
	Anxa1	-1.06467	1.96141
	Spp1	-1.5893	2.04516
	Hsp90ab1	-0.289841	1.6378
	Calr	-0.445207	1.97879
	Ifrd1	-0.603848	2.03297
	Hspa5	-0.358747	1.60444
	Vim	-0.213373	1.28736
	Ccnb1	-0.158244	0.972163
	Rbpj	-0.229848	1.41107
	Cd69	-0.670223	1.86412
	Itgav	-0.666215	2.01709
	Gfpt1	-0.543854	2.04469
	Slc1a5	-0.359118	1.43645
	Polr1c	-0.247509	1.5906
	Eef2	-0.364635	2.0345
	Rps14	-0.258554	1.34056
	Hspa8	-0.311915	1.53352
	G3bp2	-0.297518	1.71899
	Nbr1	-0.695295	2.08513
	Nucb1	-0.390704	1.92356
	Runx2	-0.359274	1.71417
	Lrrk1	-0.759314	2.52138
	Esf1	-0.303444	1.9563
	Cluh	-0.278856	1.61775
	Ksr1	-0.574962	2.19523
	Slc20a1	-0.589239	2.25714
	Gpd2	-0.545781	2.28417
	Dcaf13	-0.265716	1.75957
	Snd1	-0.299953	1.78523
	Slc7a6	-0.437355	2.12163
	Slamf7	-0.481469	1.6221
	NARS1	-0.502305	2.00773
	Iars1	-0.39637	1.9263
	Larp4	-0.279492	1.22512
	Endod1	-0.629244	2.1176
	Hmgcs1	-0.767992	2.11756
	Ddx54	-0.273743	1.38859
	Tcf25	-0.329315	1.98152
	Hdlbp	-0.352989	1.60706
	Ppan	-0.284687	1.74646
	Pdia6	-0.476038	2.04626
	Ifitm2	-0.415928	1.2701
	Cmas	-0.363643	1.56039
	Msmo1	-0.646279	2.27572
	Trmt11	-0.599673	1.82985
		-0.265801	1.34686
	Rrp15	-0.269193	1.716
	Mrto4	-0.248761	1.4662
	Tars1	-0.402645	1.96138
	Rpl22l1	-0.444163	1.23178
	Eef1g	-0.391003	2.08752
	Ergic1	-0.202301	1.36371
	Cars1	-0.477144	1.59667
	Rab27a	-0.450295	1.88485
	Acsl4	-0.514656	2.01525
	Ubxn8	-0.223704	0.876712
	Morf4l2	-0.372408	1.92001
	Hk2	-0.488427	1.69774
	Il4r	-0.416527	1.94601
	Rpl23	-0.353955	1.89314
	Pc	-0.230052	0.759776
	Tmem199	-0.412899	1.32167
	Npm1	-0.205318	1.24971
	Mars1	-0.313222	1.51841
	Hectd1	-0.361192	1.98891
	Aars1	-0.4036	1.55224
	Cyp51a1	-0.40768	1.65443
	Ero1a	-0.776967	1.74931
	Unc93b1	-0.213493	0.715829
	Yars1	-0.389834	1.85704
	Glrx	-0.529187	1.51893
	Pabpc4	-0.370939	1.94978
	Nop14	-0.220269	1.47739
	Dnajc21	-0.293998	1.50526
	Hsd17b12	-0.468315	2.11423
	Hsp90aa1	-0.395516	2.3395
	Ncl	-0.20961	1.3747
	Rpl7	-0.310456	1.71367
	Srp54	-0.430163	2.20132
	Il2rb	-0.979516	1.86226
	Pdia3	-0.28934	1.48138
	Map2k1	-0.34676	1.37836
	Il2rg	-0.430968	1.55115
	Srprb	-0.413272	2.21372
	Rpia	-0.399846	1.66573
	Ahcy	-0.219568	1.3215
	Kpna2	-0.200703	1.15787
	Erp29	-0.229082	1.37512
	Eef1d	-0.319994	1.8255
	Sec61a1	-0.336955	1.52345
	Rps11	-0.360819	2.15203
	Rpl31	-0.229452	1.52015
	Rps3	-0.269855	1.5753
	Cct2	-0.265279	1.35315
	Dhps	-0.312593	1.34438
	Tsr3	-0.31498	2.001
	Slc30a1	-0.600267	2.67386
	Eif4g1	-0.24	1.48427
	Zmiz1	-0.347713	2.37246
	Tmed3	-0.399844	2.45523
	Clasp1	-0.218238	1.39429
	Krr1	-0.289927	2.0275
	Nop53	-0.254609	1.38853
	Slc4a7	-0.604904	1.71136
	Rsl1d1	-0.239381	1.65489
	Prmt5	-0.321822	1.7979
	Plcg2	-0.71181	1.89257
	Acot7	-0.388438	1.92481
	Rnh1	-0.58056	2.11091
	Pmvk	-0.53858	2.25474
	Lrrc57	-0.456268	1.88763
	Agpat3	-0.435371	2.32401
	Pin1	-0.24217	1.04133
	Eif3i	-0.265897	1.685
	Eif2s3y	-0.228617	1.1514
	Cct7	-0.29525	1.77871
	Ppa1	-0.311754	1.8001
	Ddx21	-0.252434	1.50969
	Slc6a6	-0.526718	2.37208
	Bcl2l11	0.0478528	0.186617
	Eef1b	-0.316359	1.58129
	P4hb	-0.413288	1.83571
	Rps16	-0.2826	1.37235
	Impdh2	-0.164996	0.95906
	Fkbp1a	-0.353739	1.3636
	Rpl3	-0.266447	1.50979
	Pabpc1	-0.236001	1.21533
	Rpl12	-0.344432	2.10894
	Tnfsf9	-0.992649	1.89609
	Rangap1	-0.213066	1.04025
	Gsr	-0.299467	1.68174
	Rpl13	-0.232585	1.20698
	Shmt1	-0.244788	1.48547
	Rpl10a	-0.302505	1.72471
	Klf16	-0.19042	0.980627
	Eif4a1	-0.365057	1.85331
	Rpl26	-0.263354	1.39764
	Rps4x	-0.290862	1.69273
	Rps25	-0.27	1.45052
	Rps28	-0.36297	1.80666
	Tpt1	-0.49865	2.18801
	Cct5	-0.266993	1.60404
	Tarbp2	-0.372175	1.71517
	Vcp	-0.435158	2.05144
	Igf2r	-0.388603	2.08444
	Gpatch4	-0.264925	1.77487
	Dtx3l	-0.319035	1.7153
	Nufip2	-0.291298	1.3843
	Acaca	-0.281306	1.66556
	Zdhhc20	-0.499009	2.45936
	Scin	-1.23825	2.16159
	Ripk1	-0.436404	2.20818
	Sdf4	-0.470247	1.88716
	Phgdh	-0.237625	1.51592
	Ddx3x	-0.301005	1.66157
	Eif4g2	-0.350708	1.63524
	Hspe1	-0.308558	1.5226
	Cep170	-0.267105	1.22772
	Utp14b	-0.360687	1.39309
	Nomo1	-0.244233	1.05137
	Pdcd11	-0.307946	1.88001
	Kdm3a	-0.0726188	0.341238
	Ecpas	-0.301765	1.90547
	Larp1	-0.180928	1.04342
	Eif2s1	-0.253912	1.52765
	Ostc	-0.427892	1.70998
	Carnmt1	-0.263593	1.50847
	Psmd11	-0.34037	2.23338
	Pck2	-0.739916	1.51556
	Tm9sf4	-0.371312	1.88154
	Gopc	-0.423262	2.08036
	Pum3	-0.528047	2.82896
	Srp68	-0.318268	1.75748
	Lars1	-0.408664	1.90063
	Heatr3	-0.386525	2.19581
	Nudt9	-0.491047	2.14206
	Grsf1	-0.201382	1.19475
	Scyl2	-0.503593	2.03276
	Eprs1	-0.311726	1.71795
	Gnl3	-0.277454	1.38731
	Rnpep	-0.313571	1.67721
	Nle1	-0.189187	1.0481
	Pxn	-0.638086	2.1519
	Acly	-0.357082	1.71639
	Nifk	-0.169219	0.995291
	Ubap2	-0.149289	0.830612
	Rpn1	-0.315369	1.65866
	Ythdf2	-0.134314	0.703684
	Wdr77	-0.271346	1.38129
	Sytl2	-0.72525	2.0611
	Nop16	-0.221273	1.25222
	Lap3	-0.324605	1.95377
	Mtap	-0.310551	1.79495
	Atp6v1g1	-0.329056	1.54025
	Creld2	-0.342423	1.3847
	Rpl15	-0.270096	1.74454
	Cmss1	-0.0551942	0.251642
	Acsl3	-0.306839	1.26687
	Dimt1	-0.223455	1.14364
	Eaf1	-0.204061	1.01038
	Sec23b	-0.349313	1.71131
	Aldh7a1	-0.394307	1.35701
	Eif3f	-0.324955	1.96023
	Pes1	-0.255572	1.60167
	Stx12	-0.363686	1.75618
	Isyna1	-0.334123	1.8297
	Slc12a4	-0.60984	1.58032
	Ube2j1	-0.451949	2.06045
	Ybx3	-0.167619	0.849852
	Iigp1	-0.19963	1.15025
	Noc2l	-0.223513	1.62645
	Psmd13	-0.331908	2.09512
	Adam17	-0.442752	2.23842
	Eif3g	-0.199103	1.0811
	Ubl3	-0.563406	1.78482
	Rps2	-0.299299	1.80994
	Dnaaf5	-0.398494	2.15294
	Sub1	-0.361112	1.84614
	Cfp	-1.39831	0.947703
	Rpl13a	-0.25571	1.41303
	Sars1	-0.362124	1.5871
	Slc2a3	-0.829032	2.09938
	Rpl18	-0.2825	1.56255
	Pa2g4	-0.152406	0.891922
	Rpl18a	-0.30753	2.0149
	Rps26	-0.275111	1.76236
	Aurka	-0.252295	1.24057
	Gart	-0.232526	1.49572
	Dhx37	-0.187245	1.35833
	Ptpn23	-0.410502	1.97446
	Rps9	-0.265338	1.54981
	Naa15	-0.270315	1.73749
	Sdad1	-0.311136	1.61568
	Elac2	-0.305418	1.82594
	Tmem214	-0.400328	1.65563
	Pdxk	-0.336869	2.09286
	Os9	-0.38103	1.52145
	Slc38a1	-0.34755	1.87752
	Eif3c	-0.319789	1.79965
	Snx9	-0.0920117	0.635258
	Gnl2	-0.335144	1.81348
	Xpot	-0.459985	2.32638
	Rpl11	-0.327785	1.85996
	Aen	-0.510131	2.04856
	Etnk1	-0.40173	2.08293
	Ehd4	-0.442344	2.18649
	Sdf2l1	-0.361782	1.41638
	Casp8ap2	-0.335996	1.32943
	Eif3d	-0.221055	1.23218
	Ctsd	-0.609996	1.83928
	Mgat1	-0.287138	1.62825
	Nsun2	-0.152361	0.970035
	Naa50	-0.33382	1.95761
	Serbp1	-0.217413	1.42585
	Pdcd6ip	-0.263992	1.36839
	Sec63	-0.303776	1.50003
	Csde1	-0.240007	1.26345
	Uck2	-0.283651	1.61419
	Nsa2	-0.41257	2.10732
	Prdx5	-0.513337	1.83656
	Faap100	-0.287054	1.52467
	Ube3a	-0.2932	1.96294
	Bysl	-0.274839	1.67693
	Psmc3	-0.334372	2.00129
	Tgfb1	-0.434616	2.157
	Surf2	-0.145797	0.775405
	Rpsa	-0.340859	1.8322
	Ranbp1	-0.297559	1.60345
	Septin2	-0.285921	1.33614
	Sesn2	-0.637816	2.04081
	Rps3a	-0.24268	1.34062
	Smarcad1	-0.230856	1.6252
	Spag9	-0.318608	1.74759
	Utp18	-0.151931	0.954226
	Serpinb6	-0.605525	1.94659
	Zpr1	-0.352233	1.87883
	Ltv1	-0.247093	1.25398
	Pgghg	-0.324717	1.32611
	Gmppb	-0.370372	1.59219
	Thop1	-0.396921	2.10622
	Snx18	-0.361858	1.70795
	Gorasp2	-0.322158	1.35688
	Dnajb11	-0.306028	1.30657
	Eif2s2	-0.26176	1.34111
	Abcf2	-0.26369	1.31954
	Park7	-0.204838	1.19321
	Ola1	-0.278631	1.89265
	Shmt2	-0.243605	1.47926
	Ebna1bp2	-0.253057	1.43706
	Ftsj3	-0.235869	1.49101
	Tor1aip2	-0.534221	1.70859
	Cmtm7	-0.301631	1.60127
	Ggps1	-0.340065	1.87936
	Tjp2	-0.603162	2.23946
	Bag6	-0.2933	1.88634
	Stx8	-0.519011	2.4373
	Rpl6	-0.255134	1.39143
	Hars1	-0.314043	1.70389
	Klhdc4	-0.276258	1.64325
	Adgre5	0.268333	0.857471
	Itm2b	-0.688549	2.38098
	Rars1	-0.298052	1.94504
	Nup107	-0.233426	1.711
	Ndfip1	-0.709575	1.73091
	Cox17	-0.717297	1.42746
	Ybx1	-0.245821	1.00268
	Arcn1	-0.320271	1.89546
	Psmd4	-0.260097	1.40658
	Sgpl1	-0.468926	2.75274
	Cops4	-0.278255	1.80804
	Tcp1	-0.287069	1.62842
	Ube2o	-0.316341	1.63494
	Bola2	-0.508352	2.17714
	Fdft1	-0.675746	2.46802
	Bud23	-0.164585	0.923166
	Rpl4	-0.343631	1.84161
	Fndc3a	-0.878707	2.63981
	Polr3f	-0.367167	1.45558
	Rrp7a	-0.158548	0.927345
	Tacc3	-0.180061	1.13062
	Mettl1	-0.295817	1.70386
	Bcap29	-0.37148	2.07853
	Sra1	-0.339778	1.59574
	Copg1	-0.403236	2.48633
	Dipk2a	-0.0570011	0.324527
	Ell	-0.232282	1.1316
	Ifrd2	-0.351913	1.92141
	Hmmr	-0.135648	0.709297
	Nmt1	-0.325774	1.57153
	Rpl32	-0.351114	1.61311
	Nampt	-0.150972	0.937963
	St13	-0.185501	1.12864
	Ankhd1	-0.411155	2.15641
	Notch2	-0.513118	1.89567
	Rnf13	-0.426821	1.87472
	Pfdn2	-0.187751	1.00696
	Psmc2	-0.286436	1.45717
	Rpl5	-0.298621	1.38998
	Rrp1	-0.208811	1.32188
	Polr2l	-0.314038	2.12513
	Eif2b4	-0.255505	1.29525
	Ranbp2	-0.274672	1.76571
	Aatf	-0.0990291	0.564564
	Gpn1	-0.337317	1.71079
	Irf8	-0.341963	1.97755
	Rps5	-0.370367	1.81669
	Cdk6	0.0503279	0.248807
	Sec23ip	-0.325981	1.72347
	Eif4g3	-0.255912	1.34833
	Cdc34	-0.34605	1.82563
	Psat1	-0.428661	1.79096
	Eef1e1	-0.39604	2.26005
	Tes	-0.383979	1.70374
	Pdcd2l	-0.351894	1.69895
	Znf593	-0.247883	1.44517
	Fut8	0.104862	0.742074
	Klrk1	0.308825	1.95969
	Rpl37a	-0.369125	1.94515
	P4ha1	-0.37266	1.91626
	Slc39a6	-0.353503	0.94943
	Rrbp1	-0.365465	1.42328
	Ipo4	-0.497096	2.09468
	Pofut1	-0.212565	0.639532
	Tsg101	-0.276126	1.83076
	Upf1	-0.319294	1.80216
	Gcn1	-0.370296	1.89937
	Wdr75	-0.336835	2.18788
	Rplp0	-0.387861	2.01509
	Ssr4	-0.372697	1.78099
	Dcxr	0.769715	0.288072
	Ankrd17	-0.473249	2.47254
	Akr1e2	0.0710377	0.241448
	Strap	-0.19356	1.14692
	Psmd3	-0.282083	1.74627
	Rack1	-0.332685	1.7324
	Rif1	-0.167039	1.05897
	Trim16	-0.452724	2.2944
	Rps6	-0.232424	1.21967
	Hbs1l	-0.291797	1.44835
	Nmd3	-0.488458	2.94987
	Aacs	-0.314219	1.44627
	Rrp8	-0.171933	1.01145
	Dnajc7	-0.197256	1.21649
	Eif2b3	-0.356699	2.11862
	Nfkb1	-0.226021	1.45045
	Dnaja3	-0.188482	1.17295
	Cenpv	-0.21922	1.13364
	Por	-0.323584	1.45146
	Septin9	-0.319476	1.64085
	Ddx24	-0.313522	1.347
	Gars1	-0.342917	1.72096
	Abcf3	-0.209639	1.26059
	Psmc1	-0.344417	1.77133
	Surf6	-0.227565	1.41553
	Ifitm1	-0.337028	0.614509
	Knl1	-0.168922	1.00339
	Eif3h	-0.331745	2.05481
	Ttc4	-0.245045	1.49798
	Syap1	-0.404382	1.7252
	Prep	-0.38161	2.20634
	Snx3	-0.205453	1.31608
	Lonp1	-0.400526	1.92895
	Hsd17b7	-0.488062	1.76121
	Bsg	-0.430969	1.54689
	Grwd1	-0.317866	1.74766
	Bzw1	-0.254881	1.54845
	Mthfd2	-0.375437	1.50805
	Dnajc2	-0.174222	1.0797
	Rad23b	-0.226515	1.6029
	Cct3	-0.257245	1.51542
	G3bp1	-0.247324	1.53608
	Nme2	-0.317402	1.95379
	Prrc1	-0.481724	2.09901
	Ppp5c	-0.249089	1.65031
	Hsph1	-0.297717	1.49112
	Syncrip	-0.25862	1.67041
	Hirip3	-0.21538	1.18918
	Dync1li1	-0.450352	2.2031
	Ciao1	-0.36671	2.45064
	Znhit3	-0.31606	1.56434
	Plec	-0.241179	1.40587
	Psma1	-0.267821	1.75684
	Timm17a	-0.391818	2.3953
	Ahnak2	-1.10706	1.48464
	C1qbp	-0.0978363	0.613929
	Zfr	-0.298664	1.52735
	Psmc4	-0.354249	1.98624
	Rpl30	-0.327652	1.3114
	Cct4	-0.259609	1.5344
	Mat2a	-0.201645	1.29109
	Usp39	-0.240793	1.43099
	Bms1	-0.191646	1.06881
	Rps27	-0.250105	1.3072
	Etf1	-0.301359	1.79147
	Agps	-0.241391	1.49783
	Ufl1	-0.330794	1.91752
	E2f4	-0.291418	1.46837
	Rrp1b	-0.164385	0.955418
	Inpp5d	-0.434675	1.9581
	Isg20	-0.625277	1.88115
	Uchl5	-0.249119	1.64111
	Abce1	-0.329567	1.85242
	Acbd6	-0.502066	2.53516
	Rpl28	-0.40079	2.19002
	Notch1	-0.500734	1.72506
	Spryd7	-0.419052	1.74296
	Ccdc88b	-0.263484	1.53134
	R3hcc1l	-0.359443	1.50007
	Havcr2	-0.778415	1.66354
	Rpf2	-0.386667	2.165
	Oat	-0.138703	0.976173
	H2-D1	-0.248794	1.37519
	Rpl8	-0.288216	1.18887
	Gmps	-0.20861	1.39237
	Sec13	-0.266286	1.3079
	Tnfrsf1b	-0.274184	1.24976
	Hnrnpa1	-0.295763	1.8662
	Rps18	-0.260953	1.25937
	Ctps1	-0.303991	1.85087
	Slc2a1	-0.708698	2.3909
	Tns1;Tns1;Tns1;Tns1;Tns1;Tns1;Tns3;Tns3;Tns2;Tns2;Tns2;Tns2;Tns1	-0.421493	1.74755
	Cdk9	-0.325798	1.96716
	Rpl7a	-0.222177	1.04764
	Aprt	-0.426901	1.8806
	Lgals1	-0.514175	1.91137
	Hspa9	-0.256919	1.49033
	Vbp1	-0.204025	1.286
	Dnajc1	-0.395326	1.73232
	Prmt6	-0.210986	1.35111
	Mgat4a	-0.277472	1.57277
	Riok2	-0.35236	1.41982
	Ide	0.0496292	0.198792
	Nedd4	-0.348694	1.42472
	Rasa2	-0.223077	1.44488
	Lgals3bp	-0.307172	1.58191
	Ripor2	0.1696	0.418199
	Rab5a	-0.437845	2.52057
	Ppid	-0.28404	1.57262
	Ddx47	-0.218968	1.67588
	Farsb	-0.315998	1.89175
	Cct8	-0.231806	1.41437
	Lmo4	-0.118472	0.81937
	Eif3b	-0.226152	1.34468
	Cryzl1	-0.34807	1.52405
	B4galt5	-0.38447	0.742803
	Pdia4	-0.288213	1.20969
	Rpl27a	-0.235362	1.23401
	Aco1	-0.355868	1.4707
	Pitpnb	-0.328935	1.68462
	Dennd4b	-0.310366	1.6769
	Znhit6	-0.292503	1.89667
	Bicd2	-0.397249	2.02373
	Aldh18a1	-0.364103	1.67613
	Ubr1	-0.274128	1.81084
	Rps8	-0.340116	1.89726
	Naca	-0.291227	1.53756
	Psmd1	-0.301992	1.86701
	Pfas	-0.179888	0.977898
	Parp9	-0.315739	1.64132
	Gtse1	-0.0405621	0.162252
	Ruvbl2	-0.121064	0.773006
	Rps17	-0.405629	1.69882
	Usp14	-0.30713	1.50296
	Rpl35a	-0.22657	1.27009
	Lag3	0.352768	1.9773
	P2ry14	-0.536336	2.04945
	Srp72	-0.304871	1.99787
	Dusp11	-0.229773	1.57192
	Manf	-0.279101	0.987519
	Apob	-0.64736	2.11433
	Ankle2	-0.262114	1.35491
	Nsfl1c	-0.216779	1.32311
	Wdr3	-0.338284	2.08729
	Psmf1	-0.259915	1.34143
	Nop58	-0.200561	1.46904
	Eif3j1	-0.186257	1.27383
	Slc19a2	-0.0724679	0.15745
	Klc4	-0.416591	2.49978
	Psma7	-0.237666	1.37903
	Nefh	0.169487	0.531796
	Fkbp4	-0.117279	0.775992
	Tmem109	-0.319202	1.95475
	Dvl2	-0.223068	1.47652
	Rbm28	-0.19246	1.31913
	Eif2b5	-0.344703	1.95962
	Dhcr24	-0.552101	2.07481
	Psmd2	-0.417903	2.10751
	Mlkl	-0.522508	1.73649
	Nudt5	-0.200739	1.36769
	Tmx1	-0.336343	1.5827
	Pacsin2	-0.316926	1.68328
	Ap1s1	-0.188924	1.22225
	Pdzd8	-0.332775	2.11771
	Nip7	-0.320891	1.76998
	Ncln	-0.408581	1.96686
	Tfg	-0.282604	1.6141
	Atp6v1a	-0.493633	1.88226
	Pop1	-0.135377	0.650159
	Tspan31	-0.713277	1.67008
	Parp14	-0.301806	1.51693
	Fam98b	-0.192704	1.35499
	Eif3a	-0.300177	2.01017
	Tln2	-0.399994	1.89651
	Pwp2	-0.249952	1.56373
	Eif3l	-0.27657	1.81117
	Birc6	-0.385943	1.73017
	Hmga1	-0.124333	0.518199
	Anxa7	-0.440217	2.14831
	Hspa4	-0.258005	1.30263
	Myo6	-0.815725	1.37836
	Fkbp5	-0.275115	1.29808
	Trmt2a	-0.247478	1.38358
	Nup54	-0.240884	1.47458
	Pdcl3	-0.333692	1.84476
	Cdc123	-0.377412	2.19925
	Colgalt1	-0.276763	1.58498
	Slc7a5	-0.226651	0.802703
	Dhodh	-0.154927	1.05834
	Yme1l1	-0.167622	1.01074
	Umps	-0.292469	1.73337
	Atp6v0a2	-0.413492	1.53522
	Nap1l1	-0.125228	0.909672
	Vps26a	-0.301741	1.94627
	Dynlrb1	-0.276522	1.62517
	Eif1ad	-0.293139	1.37114
	Fam98a	-0.3366	1.90797
	Btf3	-0.0791004	0.259694
	Abcf1	-0.217876	1.2843
	Ogt	-0.259903	1.53096
	Slco4a1	-0.753	1.98939
	Txndc5	-0.252645	1.36966
	Imp3	-0.153124	0.90932
	Mthfd1	-0.224036	1.36799
	Pfkp	-0.390324	1.89178
	Srsf6	-0.167868	1.18828
	Cct6a	-0.207818	1.35655
	Akirin2	-0.414876	1.56446
	Dnajc15	-0.339638	1.11211
	Ubl4a	-0.25325	1.62226
	Timm23	-0.24833	1.33481
	Stam2	-0.322017	1.64894
	Polr2k	-0.321466	1.68046
	Psmb6	-0.331237	1.6909
	Carm1	-0.0618607	0.381523
	Nup43	-0.195893	1.33519
	Rrp12	-0.275126	1.72982
	Nubp1	-0.261512	1.30452
	Arpp19	-0.24388	1.58475
	Nfil3	-0.40895	1.16407
	Psmd14	-0.247689	1.31569
	Ugcg	-0.924978	1.99961
	Psmc5	-0.357595	1.95197
	Rps13	-0.329763	1.67239
	Nop2	-0.168887	0.996519
	Dut	-0.148153	0.829386
	Coq2	-0.0991443	0.666852
	Cyp20a1	-0.457585	1.74336
	Rpl24	-0.239619	1.31702
	Naa16	-0.328108	2.27137
	Zc3h15	-0.221906	1.36741
	Pisd	-0.34582	1.81684
	Tmem59	-0.830699	1.66723
	Snrpb2	-0.168361	1.17632
	Ap2a1	-0.332386	1.96971
	Chmp5	-0.372631	1.96771
	Ube2e1	-0.234911	1.71583
	Gfm2	-0.363858	1.36458
	Golga5	-0.277806	1.58514
	Ngdn	-0.141151	0.799701
	Phox2b	-0.139486	0.610676
	Slc1a4	-0.946738	1.72212
	Nub1	-0.25288	1.54852
	Polr1d	-0.37446	2.12422
	Srm	-0.422539	1.74921
	Pitrm1	-0.23052	1.48386
	Ntmt1	-0.392311	1.59385
	Mgat5	-0.696736	1.61981
	Usp16	-0.404174	2.22099
	Grpel1	-0.287648	1.7873
	Cldnd1	-0.388972	1.40352
	Jmjd6	-0.352449	1.8989
	Sppl2a	-0.484469	1.42756
	Psmc6	-0.300402	1.72426
	Dnajb6	-0.244899	1.45664
	Chp1	-0.493447	2.54765
	Crybg1	-0.3695	1.79009
	Rrn3	-0.420012	2.49319
	Psmg4	-0.342685	1.48013
	Plaa	-0.299928	1.65523
	Ddx5	-0.228938	1.62033
	Ndc1	-0.314723	1.9037
	Ddx1	-0.251755	1.51762
	Sil1	-0.547131	1.4991
	Sqle	-0.65572	2.15616
	Wapl	-0.264953	1.96245
	Utp4	-0.383041	2.15255
	H1-1	-0.10079	0.652081
	Usp10	-0.194438	1.20767
	Rpl35	-0.3031	1.51548
	Itgb2	-0.365884	2.0372
	Dhx30	-0.251778	1.55348
	Mydgf	-0.250346	0.85826
	Tma16	-0.165788	0.897624
	Lrrc40	-0.218361	1.5208
	Pgd	-0.325507	1.90863
	Lyar	-0.210001	1.0993
	Arf6	-0.370117	1.69468
	Rpl39	-0.44938	2.16043
	Pole4	-0.0830763	0.415064
	Psmg3	-0.236504	1.23366
	Psmd12	-0.327906	2.12318
	Wdr18	-0.230727	1.53219
	Rap1gap2	1.16949	4.64387
	Dnttip2	-0.167379	1.16888
	Rpl34	-0.312314	1.5836
	Mdh2	-0.294989	1.66169
	Rrs1	-0.202321	0.932288
	H2-K1	-0.36231	1.92018
	Itgb1	-0.266194	1.44216
	Eif1	-0.450305	2.43162
	Vamp3	-0.273622	1.43192
	Dcaf15	-0.226036	1.20599
	Rhof	-0.36064	1.20267
	Ddx18	-0.32793	1.5831
	Ugp2	-0.3238	1.69934
	Dpp3	-0.288856	1.50008
	Glrx3	-0.202829	1.26151
	Tmem176b	-0.598086	1.05441
	Ehd1	-0.356418	1.37762
	Nup37	-0.249905	1.66746
	Upp1	-1.82402	1.93723
	Baz1a	-0.297044	1.75741
	Prrc2b	-0.156913	1.11121
	Nup93	-0.221377	1.50683
	Ctu2	-0.242609	1.41988
	Wdr12	-0.225024	1.49215
	Dctn6	-0.249456	1.47868
	Polr1e	-0.212669	1.24985
	Ckap5	-0.171999	1.07615
	Pelo	-0.328322	1.48909
	Timm50	-0.186626	1.09563
	Rap1gds1	-0.351457	1.88988
	Rpl23a	-0.170091	0.841522
	Jaml	-0.128332	0.905109
	Apobr	-0.585357	2.04379
	Fdps	-0.603549	2.41164
	Parp1	0.0342741	0.177842
	Psd4	-0.423559	2.11695
	Tpr	-0.145423	0.98778
	Diaph1	-0.311768	1.99047
	Polk	-0.456431	1.93208
	Map3k4	-0.354748	2.68913
	Swap70	-0.698549	1.86082
	Gemin4	-0.350216	1.76205
	Atxn2l	-0.210412	1.18711
	Lgals3	-0.838876	1.97407
	Suz12	-0.17833	1.20093
	Csnk1d	-0.16379	0.90589
	Bccip	-0.2424	1.79022
	Patl1	-0.28152	1.5584
	Idi1	-0.631974	2.78587
	Akt2	-0.394173	2.22798
	Cnot10	-0.275928	1.83695
	Nasp	-0.186384	1.20917
	Ddx20	-0.235698	1.19827
	Pdcd4	0.653931	1.64684
	Ier5	-0.349939	1.13057
	Jund	-0.149783	0.822706
	Mybbp1a	-0.359378	1.73354
	Cops7a	-0.153225	0.787901
	Ube2v1	-0.238363	1.2767
	Unc119	-0.253453	1.36147
	Gspt1	-0.353116	2.03748
	Rbm25	-0.205142	1.38165
	Sdcbp	-0.617133	1.85379
	Psmb1	-0.224642	1.24647
	Ltb4r	-1.28687	1.83744
	Ezr	-0.256986	1.62464
	Rab22a	-0.315386	1.42199
	Tial1	-0.223168	1.13534
	Plk1	-0.138246	0.82347
	Arhgef2	-0.346806	1.9915
	Sbno1	-0.219393	1.26078
	Ipo5	-0.38654	1.98972
	Gemin5	-0.36021	1.98782
	Ythdf3	-0.232872	1.43819
	Alg2	-0.431939	1.69392
	Cmpk1	-0.469234	1.96481
	Flii	-0.350846	2.21855
	Dnaja2	-0.242982	1.43391
	Qars1	-0.391253	2.10259
	Capza2	-0.272451	1.42052
	Gfer	-0.253786	1.29104
	Kri1	-0.126515	0.738289
	Sod1	-0.209407	1.43188
	Dohh	-0.386115	1.67341
	Atp13a1	-0.301758	1.59332
	Chpf	-0.632227	1.88428
	Lnpk	-0.354876	1.75339
	Sae1	-0.157656	1.05465
	Eif1a	-0.247863	1.28007
	Tsen54	-0.190379	1.23683
	Qsox1	-0.615185	1.30518
	Serinc1	-0.478149	0.967574
	Papola	-0.197	1.42783
	Mrpl33	-0.208964	1.1526
	Copb2	-0.271748	1.73104
	Slc16a1	-0.238561	1.4888
	Anapc1	-0.240283	1.62591
	Prkci	-0.326951	1.63418
	Csnk1a1	-0.301341	1.74256
	Rpl14	-0.357597	1.85817
	Ppp1r14b	-0.292224	1.3607
	Tmed10	-0.215294	1.12712
	Dlat	-0.309165	1.7875
	Stx18	-0.305047	1.91607
	Dars1	-0.244533	1.41976
	Fkbp8	-0.247712	1.05961
	Tk1	-0.217462	1.48676
	Pdap1	-0.248273	1.47647
	Rpl10	-0.239143	1.205
	Akna	-0.249108	1.5374
	Ivns1abp	-0.181916	0.778316
	Ddx27	-0.213503	1.09912
	Tmem33	-0.390236	1.9132
	Fam136a	-0.330438	1.48726
	Yif1b	-0.248364	1.10234
	Dhdh	-0.308305	0.78511
	Kctd17	0.0760784	0.34138
	Fam207a	-0.155856	0.707133
	Eif2ak2	-0.357306	1.53233
	Bnip1	-0.680736	0.973014
	Copa	-0.356932	1.9196
	Map1lc3b	-0.336619	1.60349
	Sh2d2a	-0.418542	1.79222
	Aimp1	-0.239328	1.40654
	Acat2	-0.300429	1.59815
	Srp14	-0.309736	1.5348
	Psma4	-0.275383	1.40872
	Naa10	-0.250162	1.37081
	Prmt1	-0.243081	1.58411
	Armc6	-0.431906	2.17092
	Ttc37	-0.30262	1.83131
	Hmga1	0.212317	0.717999
	Drg1	-0.281503	1.81633
	Cish	-0.300373	0.977162
	Pkm	-0.367138	1.70068
	Lrrc59	-0.416046	1.71571
	Cdk4	-0.0887973	0.410274
	Pdcd2	-0.200234	0.926778
	Cab39	-0.309854	1.91995
	Ddrgk1	-0.31505	1.25575
	Dennd2d	-0.40017	1.76302
	Ykt6	-0.457824	1.94942
	Cstf1	-0.190888	1.0114
	Ddx42	-0.1063	0.632649
	Dync1li2	-0.311758	2.04911
	Rusc1	-0.527527	1.99392
	Atxn10	-0.367727	2.10761
	Kpnb1	-0.325607	1.77116
	Pde12	-0.18035	1.11208
	Rab6a	-0.430463	2.27534
	Degs1	-0.206654	0.764847
	Emc8	-0.255654	1.5642
	Golga2	-0.489684	2.15361
	Gps1	-0.229312	1.41966
	Ssu72	-0.306489	1.9597
	Csnk2a1	-0.296839	1.67298
	Kdm1a	-0.158384	0.893944
	Galnt7	-0.227203	1.33891
	Utp15	-0.291129	1.6875
	Srpra	-0.469791	1.89438
	Tfb1m	-0.344481	2.37395
	Rab18	-0.308208	1.78287
	Cox7a2l	-0.217159	1.25667
	Pum2	-0.186064	1.16655
	Tbcd	-0.36622	2.3159
	Pcyt2	-0.355385	1.96207
	Casp8	-0.334963	2.15589
	Rps19	-0.167719	0.893803
	Cops7b	-0.246821	1.73039
	Srebf2	-0.420622	1.8195
	Las1l	-0.0544968	0.189542
	Ube2k	-0.241556	1.3673
	Rap2a	-0.648486	2.49695
	Slc39a14	-0.941511	2.98082
	Nme1	-0.238674	1.71772
	Itgal	-0.294562	1.82152
	Acvrl1	-0.603743	0.947888
	Lrif1	0.0186806	0.0157191
	Nop56	-0.136709	0.813682
	Arfgap3	-0.476932	1.7245
	Sfr1	-0.170047	1.01911
	Caprin1	-0.219822	1.22309
	Noc4l	-0.297529	1.76808
	Pam16	-0.126776	0.625645
	Pak1ip1	-0.201576	1.24466
	Icmt	-0.241761	1.21204
	Glipr1	-0.383469	1.9804
	Ap2m1	-0.34399	1.89019
	Map2k3	-0.417327	2.02799
	Sirt2	-0.362735	1.86091
	Trmt1	-0.298857	1.60253
	Dnajc3	-0.232083	1.14951
	Lman2	-0.240368	1.02913
	Tbl3	-0.354444	2.02985
	Bola1	-0.152947	0.842397
	Ttc1	-0.299992	1.26437
	Araf	-0.358936	2.25804
	Git1	-0.184851	1.36945
	Ascc2	-0.396148	2.02884
	Pfdn4	-0.380763	1.90881
	Tcf7	0.0440315	0.0923861
	Slc25a13	-0.381594	2.0008
	Aldoa	-0.375381	1.53124
	Snrpa1	-0.161157	0.959754
	Polr1b	-0.363723	1.20424
	Spcs3	-0.269031	1.70451
	Golga3	-0.342963	1.37583
	Dhdds	-0.857857	2.5291
	Ppat	-0.197558	1.1834
	Ptpre	-0.621817	2.3617
	Kif5b	-0.288339	1.60239
	Dis3	-0.17989	1.11389
	Amdhd2	-0.192497	1.34425
	Hspa4l	-0.19344	1.15866
	Hnrnpab	-0.243732	1.49378
	Aasdhppt	-0.511476	2.64143
	Kti12	-0.18454	1.45397
	Gnpnat1	-0.347718	1.87913
	Gnl1	-0.361289	1.65365
	Zc3hc1	-0.230438	1.46603
	Pdlim7	-0.507089	1.73204
	Pspc1	-0.0988613	0.518179
	Kars1	-0.259282	1.65388
	Nemf	-0.43228	1.92828
	Stt3a	-0.245474	1.28454
	Ftl1	-0.568939	2.10371
	Ddx17	-0.246239	1.26641
	Nob1	-0.24534	1.4268
	Gng12	-0.480132	1.39204
	Actn4	-0.307365	1.74426
	Kif20a	-0.109231	0.717872
	Map1s	-0.223967	1.17177
	Zwint	-0.164732	0.628629
	Kcnk5	-0.360573	1.62491
	Gvin1	-0.417821	2.10657
	Ubap2l	-0.279739	1.63606
	Sec11c	-0.400363	1.32556
	Cpsf2	-0.21681	1.597
	Polr1a	-0.372716	1.82646
	Txndc15	-0.306161	1.14018
	Zc3h14	-0.154838	0.945496
	Cebpb	-0.102624	0.315146
	Irf2bpl	-0.245578	1.32794
	Nudcd3	-0.132942	0.902964
	Donson	-0.206749	0.88417
	Bax	-0.0417913	0.181378
	Slc35c1	-0.305538	1.69239
	Hm13	-0.277927	1.5707
	Cobll1	-0.235998	0.682641
	Trmt6	-0.343936	2.00518
	Zc3h7b	-0.314252	1.80819
	Ube2m	-0.193099	0.892845
	Map2k2	-0.329347	1.37688
	Pfdn6	-0.241984	1.74786
	Hspbp1	-0.396756	1.99122
	Fam177a1	-0.509428	2.08964
	Pdf	-0.145347	0.804374
	Heatr1	-0.33633	1.86302
	Psmd6	-0.34808	2.06067
	Capns1	-0.41323	1.45691
	Rpl7l1	-0.379773	1.45813
	Adrm1	-0.233834	1.25899
	Lrrc8c	-0.366254	2.22323
	Junb	-0.464012	1.50541
	Fus	-0.130654	0.724358
	Setd3	-0.241347	1.81312
	Elp1	-0.306052	2.03168
	Prag1	-0.634096	2.10968
	Rab17	-0.170641	0.935244
	Tmed5	-0.342765	1.87876
	Ndrg3	-0.236076	1.41451
	Ufd1	-0.322282	1.62727
	Tcof1	-0.0986374	0.669106
	Exosc10	-0.190591	1.39952
	Rps20	-0.313881	1.75412
	Rps23	-0.344441	1.7917
	Rpl36a	-0.303633	1.32891
	G6pc3	-0.190315	0.237287
	Polr1f	-0.165505	0.983538
	Sltm	-0.249002	1.58683
	Asb2	-0.417233	1.30961
	Pno1	-0.363817	1.86933
	Hemgn	0.0142077	0.0536144
	Tm9sf3	-0.334446	2.04386
	Rlim	-0.191093	0.99516
	Bcap31	-0.223928	1.469
	Cc2d1a	-0.374382	1.27911
	Ube2d3	-0.30064	1.5559
	Top1	-0.126502	0.69375
	Stxbp2	-0.392003	1.71018
	Samd9l	-0.569627	1.7933
	Nup133	-0.195312	1.21359
	Atad3	-0.129978	0.956654
	H2-Q8	-0.311312	2.056
	Cdc20	-0.0172809	0.0916116
	Tatdn2	-0.0298142	0.111625
	Eef1a1	-0.43129	1.72848
	Vhl	-0.371572	2.23339
	Eif2s3x	-0.194339	0.907356
	Psmb4	-0.186732	1.10796
	Rps19bp1	-0.0698519	0.216827
	Rmdn3	-0.223844	1.35523
	Ilf2	-0.237727	1.6188
	Gtf2f2	-0.225843	1.47674
	Morf4l1	-0.107848	0.691554
	Rfk	-0.260225	0.855635
	Fau	-0.139093	0.646235
	Luc7l	-0.23576	1.59662
	Rbm10	-0.17065	0.668768
	Ubfd1	-0.234499	0.853916
	Cops6	-0.33118	1.99802
	Lpcat3	-0.323133	1.50055
	Rrm2	-0.156045	0.700817
	Ppib	-0.235435	1.14952
	Cops2	-0.346217	1.97319
	Serpine2	-0.674711	1.69178
	Fbxw11	-0.362355	2.20845
	Glrx5	-0.317883	1.55047
	Uba6	-0.34486	1.7631
	Sugp1	-0.142922	0.851772
	Ahsa2	-0.184357	0.647636
	Mphosph6	-0.250233	1.82152
	Bcr	-0.661329	1.84904
	Atp6ap1	-0.441475	2.12846
	Psmb7	-0.317318	1.5362
	Tra2a	-0.204397	1.44877
	Lsm12	-0.191734	1.06892
	Tia1	-0.166641	1.15186
	Ddx3y	-0.291079	1.26058
	Rpl27	-0.355394	1.49097
	Chd1	-0.210963	1.41092
	Ccdc86	-0.256332	1.16601
	Mcmbp	-0.163612	1.15871
	Elp6	-0.476612	3.11504
	Ahsa1	-0.170661	1.13661
	Nup85	-0.198221	1.21997
	Psmg1	-0.168003	1.20407
	Sf1	-0.0902582	0.605734
	Tmem97	-0.340765	1.95778
	Fxr2	-0.196562	0.942224
	Ipo9	-0.205234	1.32693
	Eif4b	-0.0714763	0.283958
	Klhl25	-0.525496	0.888675
	Pex3	-0.343737	2.00518
	Gle1	-0.436538	2.10368
	Prr11	-0.0464314	0.207122
	Psmd5	-0.269171	1.69693
	Baiap2	-0.371686	1.37883
	Iws1	-0.149689	1.00011
	Slc33a1	-0.517964	1.93998
	Use1	-0.307316	1.20969
	Ran	-0.301023	1.75271
	Dennd11	-0.768698	2.13707
	Rnf149	-0.745249	1.99844
	Thoc7	-0.158486	1.08139
	Rala	-0.3827	1.93307
	Retreg1	-0.306383	1.42792
	Utp11	-0.234348	1.43503
	Gabarap	-0.27122	1.43674
	Dcun1d1	-0.267581	1.93444
	Cltc	-0.37733	2.02395
	Map6	0.113385	0.385824
	Apobec3	-0.257755	1.5406
	Mrps11	-0.228509	1.57902
	Ccnt1	-0.188467	1.01208
	Snx5	-0.144159	0.730885
	Mrpl24	-0.116815	0.757318
	Ak2	0.00349669	0.0147229
	Cyb5b	-0.412212	1.6978
	Rad51	-0.0420645	0.245482
	Lrrc14	-0.2462	1.64649
	Ttll12	-0.287009	1.53161
	Nol10	-0.166655	1.27607
	Taf6	-0.266609	1.3772
	Tcerg1	-0.242568	1.73193
	U2af2	-0.150644	0.90448
	Zfand2b	-0.350704	1.93503
	Got2	-0.15683	0.830543
	Aimp2	-0.287368	1.66346
	Tprn	-0.10614	0.663885
	Kyat3	-0.327542	1.17958
	Hccs	-0.22066	1.3135
	Nsdhl	-0.464899	1.78794
	Cad	-0.218673	1.30106
	Nudcd2	-0.101746	0.50927
	Ethe1	-0.150788	0.757859
	Mospd2	-0.345861	1.44996
	Ccm2	0.153059	0.654988
	Cul3	-0.270973	1.95136
	Ubr4	-0.43971	2.25247
	Hnrnpc	-0.18679	1.26195
	Cxcr3	0.955188	2.02631
	Txndc9	-0.248515	1.12266
	Phb	-0.174973	1.24473
	Eef1akmt4-Ece2;Eef1akmt4-Ece2;Eef1akmt4	-0.389212	2.15619
	Cnot1	-0.265824	1.84884
	Wwp2	-0.277074	1.28574
	Gpaa1	-0.320596	1.64044
	Tut7	-0.141217	0.698561
	Xpo5	-0.274934	1.74931
	Rcl1	-0.394413	1.94479
	Pag1	-0.387501	1.38507
	Itch	-0.353972	1.85748
	Sec31a	-0.280709	1.09748
	Mrps6	-0.290159	1.98928
	Ppp2cb	-0.27743	1.7736
	Morc2a	-0.161325	0.980949
	Pdpk1	-0.279672	1.85721
	Stip1	-0.147561	0.821139
	Ppp1r10	-0.322452	1.70153
	Cbl	-0.1542	0.952937
	Smap2	-0.362713	1.234
	Uchl1	-0.269968	1.39783
	Arfgap1	-0.212969	0.934288
	Thoc1	-0.211714	1.39714
	Ly6a	-0.572338	1.18465
	Pctp	-0.237218	1.38008
	Dhx33	-0.207776	1.13857
	Gcsh	-0.585526	1.71617
	Vamp7	-0.51216	2.48105
	Kdm4a	-0.334913	1.15691
	Set	-0.114532	0.633917
	Ube2q1	-0.377048	2.11489
	Cdkn1a	-0.69692	1.26425
	Strn3	-0.340367	1.58487
	Urb2	-0.300349	1.32939
	Ciapin1	-0.29738	1.66171
	Polr2e	-0.116608	0.67568
		-0.549622	2.55775
	Vps13a	-0.476199	2.36628
	Ctla4	-0.525169	2.40922
	Slc7a6os	-0.248118	1.11447
	Matr3	-0.199471	1.01431
	Ssr2	-0.52151	2.54849
	Rpn2	-0.419559	1.95489
	Nudc	-0.099567	0.502866
	Metap1	-0.376532	1.98083
	Cnot9	-0.355882	2.43842
	Chd4	-0.122526	0.865518
	Haus7	-0.426596	2.31876
	Rpap2	-0.174979	0.812302
	Klhdc10	-0.223604	1.06532
	Ppp6r1	-0.256335	1.65756
	Eif4e	-0.286728	1.76323
	Dhx35	-0.179367	1.23667
	Kras	-0.406515	1.83282
	Slc7a1	-0.203384	1.01831
	Gss	-0.29687	1.53295
	Dhx15	-0.20206	1.34663
	Got1	-0.146951	0.794168
	Rnf20	-0.243826	1.32807
	Mmadhc	-0.492694	2.11162
	Kpna6	-0.349796	1.72557
	Zfand5	-0.292553	0.86443
	Eif2d	-0.259167	1.45564
	Mafk	-0.227972	1.18516
	Srfbp1	-0.382613	1.54609
	Ccdc47	-0.274771	1.73156
	Pgp	-0.25949	1.76124
	Gsto1	-0.179981	0.813098
	Cblb	-0.481431	2.33456
	Ppil3	-0.172192	1.0173
	Gabarapl2	-0.240358	0.970678
	Rrp9	-0.205991	1.01932
	Snf8	-0.345963	1.8199
	Ilkap	-0.35166	2.04104
	Hspa14	-0.152589	0.908389
	Exoc5	-0.472053	2.11843
	Tpp2	-0.27626	1.6566
	Pabpn1	-0.125247	0.767427
	Polr3d	-0.314789	1.69233
	Ltn1	-0.455224	2.02779
	Ints6	-0.245696	1.71276
	Rab3gap1	-0.293667	1.49039
	Adpgk	-0.30628	1.99742
	Pilrb	-0.551683	1.36361
	Timm13	-0.274394	1.23385
	Uchl3	-0.341794	1.72371
	Sec61b	-0.22746	0.950733
	Stoml2	-0.30208	1.69885
	Prdx3	-0.340092	1.74814
	Sec61g	-0.476883	1.87921
	Nans	-0.358792	1.86429
	Mia2	-0.40907	1.89058
	Ppic	-0.238161	1.27236
	Ufc1	-0.29053	1.64214
	Ppp4r3b	-0.143556	0.925879
	Romo1	-0.315702	1.41414
	Emc10	-0.338211	2.0831
	Thg1l	-0.245528	1.36731
	Ube2g2	-0.364784	1.44526
	Trap1	-0.011713	0.053913
	Mrpl37	-0.139935	1.02174
	Ruvbl1	-0.188962	1.04544
	Tnip1	-0.322602	1.78864
	Stk39	-0.439736	2.06635
	Atp6v1e1	-0.318341	1.53092
	Ly75	-0.419043	1.91588
	Rpl29	-0.261434	1.24666
	Cdk1	-0.105338	0.664603
	Cdc16	-0.257877	1.741
	Fdx2	-0.440077	1.59428
	Ireb2	-0.210409	1.08908
	Ipo7	-0.390779	1.83183
	C1galt1	-0.354593	1.67167
	Cse1l	-0.166821	1.0018
	Tanc1	-0.815127	2.01171
	Psmd8	-0.305599	1.7564
	Fcf1	-0.249627	1.12131
	Ralgapa2	-0.377936	2.18744
	F2r	-0.204382	0.70971
	Eloc	-0.26559	1.40571
	Poldip2	-0.220923	1.44593
	Bcas2	-0.184675	0.810501
	Rwdd4	-0.122041	0.535391
	Ddx10	-0.25517	0.980818
	Ranbp6	-0.57295	2.81643
		-0.347611	1.27481
	Snrnp40	-0.116485	0.604315
	Hnrnph1	-0.166294	1.14943
	Ube2a	-0.248663	1.26587
	Egr1	-0.520917	0.750925
	Rpap3	-0.162862	0.948229
	Lmnb2	-0.185827	1.22266
	Arfgap2	-0.231899	1.38833
	Selenos	-0.374708	1.10492
	Plxdc2	-0.536873	1.23471
	Spg21	-0.271478	1.75518
	Tpcn1	-0.194695	0.630609
	Canx	-0.21503	0.932685
	Mmgt2	-0.14972	0.655426
	Fkbp15	-0.343474	2.13407
	Fkbp3	-0.171518	1.02247
	Cndp2	-0.182201	1.28933
	Slc38a10	-0.250252	0.99003
	Cpsf6	-0.110659	0.583602
	Ankrd52	-0.522639	1.84412
	Tnfrsf10b	-1.05483	1.90917
	Lamp1	-0.172591	0.972999
	Rbx1	-0.186688	0.90077
	Exosc1	-0.140193	0.867147
	Slc30a7	-0.19136	1.25814
	Dip2b	-0.209409	1.42266
	Gclm	-0.0810359	0.293349
	Rpl36	-0.381905	1.69032
	Eif3k	-0.281266	1.24357
	Nedd4l	-0.412834	1.88699
	Arhgap17	-0.377333	2.51933
	Clic4	-0.477672	2.0191
	Urb1	-0.412437	2.31401
	Rbm39	-0.194891	1.3815
	Lrp10	-0.691057	1.56543
	Igf2bp3	-0.929188	1.68737
	Lman1	-0.242559	0.881205
	Sart1	-0.10855	0.703152
	Rpl21	-0.327589	1.15214
	Srsf3	-0.187568	1.33018
	Pyhin1	-0.440063	1.2396
	Map2k7	-0.255914	1.63157
	Ubqln1	-0.26047	1.35577
	Drosha	-0.0891933	0.431087
	Hgh1	-0.0745885	0.13369
	Prpf4	-0.179625	1.11364
	Eno1	-0.376277	1.7216
	Glo1	0.690097	2.87367
	Apex1	-0.248862	1.38658
	Hnrnpk	-0.165761	1.05666
	Gdi2	-0.266662	1.82139
	Gigyf2	-0.166126	0.866335
	Ccdc124	-0.252623	1.40798
	Copb1	-0.43543	2.28549
	Snrpd2	-0.201804	1.40743
	Ptges3	-0.334113	1.94241
	Stt3b	-0.271441	1.5085
	Rps27l	-0.146974	0.559114
	Hk1	-0.408291	1.86859
	Ggnbp2	-0.064697	0.150472
	Map2k4	-0.367601	1.92682
	Thoc6	-0.181571	1.06561
	Recql5	-0.56947	1.88171
	Fhl3	-0.209588	0.498702
	Pus7l	-0.0622804	0.277854
	Rpl9	-0.432441	2.00755
	Pms2	-0.244216	1.25472
	Dtl	0.0593401	0.21041
	Nmt2	-0.464822	2.29452
	Clpp	-0.130623	0.500523
	Hspd1	-0.331262	1.60281
	Czib	-0.298098	1.99498
	Usp47	-0.246751	1.81602
	Tdrd3	-0.238729	1.25432
	Psmb8	-0.201477	1.25921
	Skiv2l	-0.345799	1.86826
	Prdx1	-0.158794	0.979735
	Nudt2	-0.541251	2.81567
	Txnl1	-0.140778	0.684018
	Ap2b1	-0.276572	1.66087
	Tstd3	-0.462423	1.72425
	Nploc4	-0.325842	1.9094
	Adam8	-0.972393	1.6752
	Mcm7	-0.120732	0.876002
	Afg3l1	-0.336108	1.89809
	Pwp1	-0.390159	1.82203
	Atp6v1f	-0.48913	1.50434
	Lime1	-0.415889	2.07258
	Gk	-0.198344	0.90934
	Cdk7	-0.208651	1.14314
	Tbl2	-0.312029	1.50027
	Timmdc1	-0.362947	1.56081
	Clptm1	-0.227991	1.06329
	Tkt	-0.182803	1.17224
	Hnrnpk	-0.242171	1.04526
	Rps12	-0.342437	1.75426
	G6pdx	-0.287859	1.65351
	Cwc15	-0.282339	1.18305
	Zc3h11a	-0.157005	0.862172
	Trafd1	-0.46456	2.10131
	Mthfd1l	-0.200409	1.25771
	Alg5	-0.286798	1.61686
	Cisd1	-0.358062	1.68837
	Otud5	-0.108274	0.583458
	Napa	-0.271541	1.54398
	Pcbp2	-0.240165	1.43097
	Wdr43	-0.365342	1.53638
	Nudt4	-0.25615	1.66046
	Eurl	-0.205344	1.20207
	Wnk1	-0.195641	0.83598
	Fam111a	-0.278761	1.63585
	Bcl7c	-0.0545277	0.324293
	Camk4	-0.258151	1.73515
	Pdcd5	-0.412259	2.45803
	Naa20	-0.436404	1.90674
	Zzef1	-0.27431	1.74056
	Bri3bp	-0.162886	0.754987
	Kntc1	-0.216067	1.50411
	Tdrp	-0.614452	0.812022
	Naa30	-0.299045	1.59139
	Arhgap18	-0.381602	1.9279
	Mrpl43	-0.168692	1.04566
	Rnf2	-0.285642	1.83825
	Mrpl45	-0.141824	0.711855
	M6pr	-0.440976	1.64541
	Tsr1	-0.331895	1.42733
	Herpud1	-0.667883	1.90631
	Nol6	-0.374584	1.81001
	Amfr	-0.296695	1.44804
	Cfap44	-0.114009	0.439515
	Ik	-0.202403	1.31392
	Mrps2	-0.297384	1.8148
	Sp100	-0.0155614	0.0726573
	Sec24c	-0.313253	1.66923
	Rpl17	-0.414891	1.7166
	Nxt1	-0.270134	2.02987
	Rbis	-0.0803081	0.322694
	Exosc3	-0.264732	1.74911
	Desi1	-0.502244	2.5959
	Ddost	-0.36766	1.56611
	Nfu1	-0.298599	1.293
	Strn4	-0.0974098	0.327151
	Marchf5	-0.599473	2.3678
	Thumpd1	-0.167058	1.20258
	Aco2	-0.151232	0.902633
	Pik3ap1	-0.878411	1.50935
	Fam20a	-0.720555	2.30611
	Ccnd2	-0.641279	1.97165
	Fra10ac1	-0.193045	0.883937
	Nsf	-0.308449	1.84245
	Uggt1	-0.22882	1.12136
	Tpm3	-0.262971	1.88405
	Pgam1	-0.256412	1.0903
	Tnf	-0.638291	1.24632
	Fh	-0.197786	1.13196
	Crot	-0.4091	2.09369
	Erlin2	-0.279344	1.65798
	Golga7	-0.306776	1.21948
	Ifngr1	-0.155797	0.704505
	Dok2	-0.300114	0.888593
	Lin7c	-0.183318	0.976686
	Nol12	-0.0736342	0.240992
	Npat	-0.357974	2.2966
	Arih2	-0.306386	2.0258
	Heatr5b	-0.413277	1.67791
	Fam118b	0.131287	0.515365
	Gns	-0.459496	1.52414
	Srsf4	-0.174905	1.14364
	Gpatch1	-0.181374	1.05234
	Pnp	-0.351159	1.93446
	Dnajc24	-0.336404	1.41686
	Hltf	-0.245092	1.01683
	Vapa	-0.459567	1.88601
	Pcf11	-0.266894	1.56084
	Rps15a	-0.451278	2.01562
	Tnpo1	-0.350011	1.83054
	Sf3a3	-0.117261	0.724501
	Tex2	-0.358344	1.3984
	Mapkapk2	-0.355665	1.31864
	Chd8	-0.167155	0.973233
	Laptm5	-0.528313	0.593465
	Twf1	-0.151045	0.501965
	Asah1	-0.545159	1.91319
	Nras	-0.269843	1.15743
	Usp25	-0.265315	1.58336
	Xkr5	-0.366945	1.60779
	Gmip	-0.256596	1.46094
	Slc44a2	-0.212633	1.58876
	Ubxn4	-0.113103	0.417029
	Mcts1	-0.199363	1.1003
	Eif4enif1	-0.125735	0.699846
	Cpsf3	-0.155901	1.11065
	Bub3	-0.106937	0.64938
	Spata5	-0.323208	2.01685
	Prmt7	-0.41839	2.51167
	Rab5c	-0.506202	2.49622
	Usp7	-0.153048	1.09587
	Ppp4r3a	-0.226272	1.66577
	Akr7a2	-0.139398	0.968211
	Slc35c2	-0.42998	1.96042
	Babam2	-0.229011	1.2013
	Ddb1	-0.269579	1.89438
	St3gal4	-0.267195	1.57874
	Hgs	-0.285332	1.47002
	Rbm12b1	-0.537099	2.84653
	Ifi35	-0.164909	0.955104
	H1-0	-0.403551	1.24332
	Mrpl19	-0.203176	1.18288
	Apip	-0.336163	1.92311
	Mtdh	-0.112484	0.591035
	Tpm3	-0.191078	1.17132
	Ppp4c	-0.167819	1.11973
	Commd1	-0.345028	2.21711
	Cep41	-0.280322	1.69109
	Ate1	-0.241547	0.968472
	Trappc8	-0.298533	1.5574
	Sh3bp2	-0.326736	1.31913
	Arf4	-0.248039	1.68284
	Actc1	-0.368208	1.65496
	Rpl38	-0.422388	2.15546
	Svil	-0.30131	1.48986
	Rnf115	-0.40218	1.88362
	Chaf1a	-0.211647	1.66688
	Hexb	0.0619173	0.210232
	Gtf2e1	-0.190728	1.09059
	Ube2l3	-0.311369	1.61744
	Impdh1	-0.278974	0.9552
	Hm13	-0.727144	2.40031
	Eif3m	-0.418767	1.93611
	Nek6	-0.0095365	0.0136312
	Ppp1ca	-0.233255	1.30495
	Erp44	-0.169728	0.814419
	Clk3	-0.263784	1.53483
	Vars1	-0.141194	0.841498
	Gimap4	0.126411	0.757655
	Pmpcb	-0.0847932	0.528182
	Ppp2r1a	-0.305286	1.87113
	Dusp12	-0.41214	2.17355
	Usp1	-0.100334	0.650906
	Nup62	-0.231896	1.00025
	Coro1c	-0.246972	1.49072
	Nfatc2	-0.119934	0.613884
	Ambra1	-0.22676	1.12303
	Slc4a1ap	-0.131806	0.429464
	Atp6v1d	-0.350601	1.59975
	Atp6v1b2	-0.423147	1.8651
	Rab2a	-0.292408	1.74754
	Uso1	-0.488095	1.79752
	Pdxdc1	-0.515288	1.55525
	Dlgap4	-0.44131	1.65738
	Ncoa4	-1.15333	2.04438
	Hat1	-0.150579	0.973423
	Kiaa2013	-0.248021	1.49831
	Tent2	-0.266137	1.18208
	Cmtr1	-0.224514	1.45212
	Vti1a	-0.265711	1.63035
	Htra2	0.0875684	0.520411
	Cbfb	-0.213893	1.34456
	Sharpin	-0.227118	1.51848
	Uba1	-0.312169	1.6823
	Man2b2	-0.467675	1.90608
	Cdk2	-0.116013	0.66237
	Dbnl	-0.159475	1.0146
	Ppp2r1b	-0.399539	2.31216
	Slc25a1	-0.345323	1.71789
	Vps28	-0.277469	1.5056
	Lrpap1	-0.493616	1.85076
	Naa25	-0.319938	1.3526
	Psme4	-0.321018	1.54802
	Ezh2	-0.122298	0.737775
	Alg3	-0.53109	1.97977
	Sema4d	-0.253313	1.82242
	Utp3	-0.235785	1.20306
	Ppp4r2	-0.128363	0.730315
	Abr	-0.395612	1.41472
	Copg2	-0.479527	2.37233
	H2-T23	-0.336814	1.66038
	Gba	-0.286249	1.24432
	Riox2	-0.251833	1.51137
	Ahctf1	-0.134863	0.700993
	R3hdm1	-0.128574	0.904722
	Slk	-0.273827	1.16771
	Grpel2	-0.605703	2.05871
	Niban1	-0.783288	2.4305
	Ddx39a	-0.200487	1.28069
	Rbm15	-0.180248	1.1856
	Dda1	-0.413408	2.75249
	Eif3e	-0.278973	1.68626
	Znf330	-0.458854	1.73824
	Sf3b3	-0.201361	1.30185
	Ganab	-0.333702	1.72366
	Ada	-0.179093	1.22633
	Arl14ep	-0.33966	1.8854
	Emg1	-0.252721	1.47465
	Prpf6	-0.10788	0.607258
	Yju2	-0.142922	0.814177
	Idh1	-0.518686	2.07164
	Sun2	0.114195	0.558086
	Rtf2	-0.34681	1.80543
	Ncbp2	-0.196465	1.45682
	Ilf3	-0.157667	0.884767
	Ncdn	-0.288596	1.32283
	Prrc2c	-0.14214	0.730845
	Ndufaf4	-0.739542	1.98038
	Gde1	-0.275631	1.58933
	Arhgdia	-0.208252	1.06046
	Fnbp1	-0.145289	0.857224
	Eftud2	-0.137453	0.753041
	Stmn1	0.26013	1.25144
	Ccdc167	-0.254839	1.32013
	Nup88	-0.167654	0.727307
	Nptn	-0.0919905	0.532778
	Polr2c	-0.260484	1.5561
	Tarbp1	-0.366699	1.46264
	Dctn3	-0.258338	1.75141
	Actr1b	-0.318326	1.96518
	Riok3	-0.439745	1.67254
	Timm44	-0.349669	1.75594
	Glmp	-0.501241	2.01978
	Cuta	-0.473686	1.97752
	Elob	-0.229521	1.15742
	Pus1	-0.240336	1.30074
	Slc16a10	-0.936467	2.14812
	Ddx49	-0.402426	1.70564
	Etv3	-0.165888	0.80863
	Prpf8	-0.27627	1.73759
	Slirp	-0.25276	1.61205
	Dnmt1	-0.0362083	0.196821
	Dnajc13	-0.343083	1.99404
	Atp5f1d	-0.184448	0.988727
	Reps1	-0.27643	1.69993
	Ccdc58	-0.109342	0.490147
	Ecd	-0.362263	1.93432
	Plpbp	-0.233302	1.57368
	Larp7	-0.0597683	0.353738
	Slc39a7	-0.282246	0.857925
	Fhod1	-0.194033	1.32154
	Anapc2	-0.274761	1.63674
	Ppwd1	-0.223735	1.6574
	Card11	-0.261499	1.38235
	Tmem209	-0.211079	1.09889
	Gar1	-0.134276	0.817626
	Wtap	-0.258945	1.8129
	Dusp5	-0.783224	2.00358
	Abitram	-0.251292	1.39246
	Pus7	-0.13886	0.622969
	Akr1c13	0.0756629	0.295848
	Rgs3	-0.310511	2.11345
	Kif15	-0.190137	0.94499
	Gtpbp4	-0.292866	1.40614
	Stx7	-0.243904	0.440431
	Fto	-0.225983	1.54008
	Aifm1	-0.159432	0.796468
	Ybx3	-0.179389	0.363027
	Rai14	-0.447848	1.81224
	Vasp	-0.331855	1.51102
	Dock10	-0.173683	1.20422
	Cast	-0.329339	1.83134
	Tbrg1	-0.0482962	0.224298
	Stau1	-0.192649	1.03758
	Cul2	-0.358754	2.11699
	Utp20	-0.329725	1.56467
	Ergic3	-0.151512	0.652132
	Gale	-0.329458	1.47897
	Psma5	-0.312674	1.59508
	Psmb3	-0.284062	1.80291
	Zwilch	-0.332043	1.91963
	Galnt1	-0.379653	1.61256
	Fgl2	-0.492108	1.57349
	Nxn	-0.35394	1.36301
	Shq1	-0.558766	1.70448
	Eef1akmt1	-0.43237	2.17751
	Cnpy2	-0.221229	1.52244
	Yipf4	-0.258637	1.58739
	Gapdh	-0.384397	1.57327
	Appl2	-0.785161	2.0911
	Eml2	-0.241405	1.3189
	Chmp4b	-0.199466	1.1194
	Ppp1r8	-0.283274	1.59996
	Sf3a1	-0.121461	0.72222
	Mtmr1	-0.361135	2.00969
	Eif4a3	-0.163406	1.20589
	Nup188	-0.333749	1.79181
	Ist1	-0.269049	1.60303
	Man2a1	-0.311487	1.49592
	Rilpl2	-0.38511	1.94279
	Cebpz	-0.279895	1.27672
	Rraga	-0.241818	1.52651
	Brcc3	-0.162867	1.02193
	Ifng	-1.46149	1.53879
	Rps15	-0.330921	1.35215
	Custos	-0.148696	0.769935
	Ubxn1	-0.217504	1.0972
	Triobp	-0.402005	2.25706
	Ogdh	-0.242751	1.59259
	Ccne1	-0.507581	0.841924
	Dcaf1	-0.165268	0.979111
	Rce1	-0.376697	2.00596
	Setd1a	-0.152798	1.10825
	Edf1	-0.151838	0.859643
	Dnpep	-0.277818	1.42429
	Pafah1b1	-0.226693	1.17719
	Acot8	-0.232065	0.905083
	Rbm12b2	-0.373564	1.92923
	Trpv2	-0.456766	1.68399
	Api5	-0.183811	1.33178
	Enpp4	-0.573595	2.80132
	Lrrc32	-0.493028	1.33025
	Wac	-0.132669	0.726409
	Wdr36	-0.161224	0.798931
	Wars1	-0.166763	1.042
	Snrnp200	-0.280398	1.79444
	Hint1	-0.311679	1.68526
	Mta1	-0.099848	0.665308
	Hnrnpr	-0.151333	1.12012
	Gbf1	-0.358391	1.87679
	Hmces	-0.110529	0.779925
	Slu7	-0.0786924	0.439367
	Trmt112	-0.164052	0.775941
	Cd82	-0.0357677	0.1125
	Pkm	-0.315858	1.62552
	Atl2	-0.138636	0.740744
	Atf7ip	-0.225602	1.19856
	Snrnp70	-0.0950108	0.484208
	Ulbp1	-0.614487	2.02931
	Rab3gap2	-0.469963	1.98459
	Abhd5	-0.459362	0.882926
	Mpp6	-0.0588073	0.224445
	Cstf2t	-0.143429	0.697759
	Ccar2	-0.152289	0.890345
	Tmed9	-0.385797	2.05374
	Ttc27	-0.163397	0.631115
	Prkcb	0.132317	0.612724
	Rps21	-0.14699	0.539835
	Rbm38	-0.272726	1.03572
	Cwc22	-0.302253	1.94858
	Ddx46	-0.209215	1.19109
	Psma6	-0.276307	1.65751
	Ap2a2	-0.444578	2.34072
	Slc16a3	-0.483916	1.84896
	Gak	-0.222303	1.35559
	Twsg1	-0.298605	1.28106
	Snrpd3	-0.185393	1.21027
	Ldha	-0.368822	1.87088
	Wdr11	-0.271618	1.1919
	Ikzf4	-0.242266	1.51
	Mrpl50	-0.0999153	0.345092
	Trip11	-0.590808	2.60899
	Mrpl39	-0.213415	1.11686
	Usp11	-0.288844	1.35671
	Znf428	-0.127375	0.28027
	Sec24a	-0.507463	1.99524
	Mtss1	-0.500459	0.854516
	Gzmf	-1.58286	3.77351
	Cpsf4	-0.145234	0.938749
	Stard4	-0.455816	1.56452
	Bub1b	-0.0560925	0.304368
	Ncstn	-0.325701	1.55589
	Csnk2a2	-0.266255	1.46256
	Relch	-0.532494	1.89772
	Fnbp4	-0.0733947	0.409952
	Man2a2	-0.638442	1.57574
	Ankfy1	-0.571146	1.57562
	Crnkl1	-0.154249	1.13297
	Abcb8	-0.325722	1.81992
	Selenot	-0.353897	1.6249
	Fdx1	-0.367755	1.04557
	Nudt21	-0.124414	0.78627
	Rabggta	-0.291959	1.49405
	Ppia	-0.150307	0.894797
	Ube2s	0.0339195	0.119266
	Dhx9	-0.157644	1.0897
	Pfkl	-0.296239	1.6674
	Vps4b	-0.277303	1.58202
	Taf9	-0.0853024	0.443679
	Kiaa1671	-1.80633	3.79804
	Nop9	-0.20312	1.15788
	Rcsd1	-0.135173	0.640993
	Supv3l1	-0.10071	0.523203
	Ccdc50	-0.0485537	0.192586
	LRWD1	-0.281814	1.84568
	Paf1	-0.159239	0.928503
	Tomm34	-0.18707	1.00199
	Exosc7	-0.217406	1.38616
	Vps53	-0.181601	0.986458
	Get4	-0.274265	1.38446
	Slc25a3	-0.312725	1.78482
	Cacul1	-0.163382	0.628755
	Otud4	-0.324022	1.79046
	Tmx3	-0.30133	1.7207
	Pomp	-0.347912	1.19148
	Dus2	-0.423159	1.16178
	Dbt	-0.464631	2.1026
	Eloa	-0.110278	0.51505
	Kif2c	-0.0508308	0.272637
	Rps24	-0.253155	1.18613
	Nup58	-0.125763	0.727904
	Eif5a	-0.36737	1.56864
	Pih1d1	-0.0936314	0.568638
	Kmt2b	-0.222248	1.2934
	Sh2d3c	-0.230033	1.61763
	Keap1	-0.27048	1.93567
	Smu1	-0.251361	1.61946
	Rab1A	-0.270196	1.41455
	Rcc1	-0.114276	0.730858
	Ube2n	-0.123889	0.664965
	Limd2	0.576491	1.96366
	Aarsd1	-0.349212	1.49665
	Uprt	-0.587129	2.24511
	Uba2	-0.125905	0.715417
	Sympk	-0.214091	1.31592
	Tmed7	-0.382264	2.10628
	Clp1	-0.239809	1.51944
	Scarb2	-0.518275	2.81319
	Mrpl2	-0.133829	0.797908
	Kif11	0.0725558	0.408481
	Lxn	-0.657713	2.31309
	Fbl	-0.287129	1.48968
	Smarca5	-0.145182	1.01734
	Ctss	0.441847	1.69195
	Dlgap5	-0.0294237	0.107113
	Snw1	-0.0803095	0.449978
	Ppp3ca	-0.193861	1.51693
	Dock8	-0.313547	1.82284
	Serinc3	-0.31254	1.1745
	Dync1i2	-0.175146	0.883915
	Nudt1	-0.311304	1.66503
		-0.164202	0.834669
	Klk8	-0.382379	1.06334
	Phb2	-0.170418	1.1846
	Snx17	-0.283189	1.68811
	Adar	-0.309602	1.82799
		-0.588426	2.81363
	D6Wsu163e	-0.417162	2.98355
	Brox	-0.190416	0.960026
	Pcbp1	-0.186415	1.00628
	Vcpip1	-0.197604	1.20684
	Commd10	-0.219398	1.29059
	Capzb	-0.25989	1.64965
	Fxr1	-0.304312	1.64414
	Nol7	-0.104905	0.550032
	Cks2	-0.0015747	0.00441192
	Pgrmc2	-0.224976	1.19131
	Fcer1g	-1.25342	1.99167
	Nsrp1	-0.0429964	0.186721
	Ints11	-0.149727	0.998293
	Spast	-0.308871	1.93097
	Mrpl40	-0.170011	0.799458
	Ammecr1l	-0.324897	1.11502
	Ldlr	-0.531878	2.61857
	RTRAF	-0.392287	2.06877
	Kidins220	-0.452354	2.12154
	Pank2	-0.25524	1.67466
	Nubp2	-0.201725	1.17941
	Lrpprc	-0.269823	1.52357
	Med16	-0.189403	1.22401
	Thyn1	-0.201053	1.42222
	Cdk5rap3	-0.426977	2.14082
	Rwdd1	-0.380436	1.96738
	Chordc1	-0.197641	1.02174
	Prpf31	-0.272825	1.58132
	Tut1	-0.29102	1.06843
	Tspyl1	-0.31202	0.684776
	Pdhx	-0.275959	1.62736
	Strip1	-0.401418	1.83574
	Cul5	-0.260166	1.79111
	Usp19	-0.277429	1.44118
	Tmem30a	-0.310879	1.92487
	Cert1	-0.209937	0.71354
	Aamp	-0.326008	1.93697
	Cnot6	-0.228724	0.362878
	Hmox2	-0.158443	0.797815
	Mogs	-0.179671	1.03692
	Pdcl	-0.165519	0.910503
	Fbxo42	-0.349773	1.86378
	Ess2	-0.143728	0.814582
	Hmbs	-0.294085	1.38766
	Rabggtb	-0.303547	1.24443
	Cd47	-0.222092	0.8733
	Tpp2	-0.298066	0.997517
	Sla2	-0.215292	1.08025
	Ptk2b	-0.355919	1.92906
	U2surp	-0.221101	1.29186
	Aqr	-0.286532	1.74851
	Znf622	-0.181577	0.716209
	Utp14a	-0.252099	1.17644
	Acin1	-0.124461	0.825897
	Eif1ax	-0.380142	2.14259
	Pole2	-0.0751385	0.436367
	Anks1a	-0.414412	1.65886
	Exosc2	-0.142579	0.833181
	Rbm43	-0.176023	1.17388
	Mtx1	-0.241317	1.72511
	Galnt3	-0.797867	1.88601
	Ncf4	-0.324748	1.69991
	Setdb1	-0.39395	1.9513
	Ogfr	-0.165163	0.763865
		-0.294034	1.35522
	Sart3	-0.0970847	0.511626
	Ovca2	-0.257801	1.46489
	Napg	-0.253975	1.28498
	Trip12	-0.164507	0.487457
	Mrps30	-0.293551	1.58073
	Pmpca	-0.325254	1.95206
	Mcm4	-0.18294	1.27273
	Wdr74	-0.122786	0.600932
	Rbl2	-0.379044	1.32367
	Rtcb	-0.107424	0.571884
	Ccdc12	-0.0526641	0.302127
	Elp2	-0.276216	1.55261
	Fabp5	0.0303319	0.108744
	Eed	-0.109744	0.661916
	Acadl	-0.303333	1.8221
	Mcm6	-0.153062	1.06268
	Mgme1	-0.254451	1.24489
	Usp36	-0.0896759	0.232497
	Mvb12a	-0.196505	1.13574
	Klc1	-0.361971	1.74945
	Tgtp2;Tgtp1	-0.21305	0.911278
	Tonsl	-0.265869	1.40842
	Scamp2	-0.341278	1.42354
	Gbp7	-0.243454	1.33149
	Get3	-0.286006	1.79205
	Tbc1d2b	-0.804693	1.96704
	Actb	-0.550574	2.25674
	Arih1	-0.287743	1.56667
	Asb6	-0.59306	2.21087
	Ube2i	-0.26392	1.48527
	Tm9sf2	-0.409048	1.65224
	Diexf	-0.372337	1.91802
	Dph2	-0.216246	1.0645
	B4galnt4	-0.119961	0.200448
	Slc25a24	-0.518062	1.58926
	Rbm4	-0.132185	0.605572
	Agfg2	-0.274413	1.5261
	Sec23a	-0.477689	1.92783
		-0.157926	0.394576
	Tle3	-0.379248	1.69472
	Tiprl	-0.137349	0.695076
	Nars2	-0.0583704	0.243111
	Septin11	-0.164071	1.02635
	Huwe1	-0.308719	1.76444
	Hcfc2	-0.199151	1.11238
	Alg11	-0.334736	1.52505
	Ccdc93	-0.13056	0.909862
	Dctpp1	-0.503288	2.00975
	Pbk	-0.232858	1.36449
	Ntpcr	-0.210312	1.07277
	Psma2	-0.283779	1.52521
	Aip	-0.247058	1.40782
	Nt5e	1.78251	3.62742
	Rhbdf2	-0.486247	0.546535
	Ubash3b	-0.640803	2.78908
	Tomm40	-0.176534	0.906029
	Tmf1	-0.366206	1.72806
	Rpusd2	-0.718913	1.49211
	Ccdc51	-0.317322	2.20707
	Nolc1	-0.0259394	0.0910995
	Trappc4	-0.326898	1.97435
	Dnajc8	-0.138852	0.876917
	Tagln2	-0.144705	0.871322
	Ywhag	-0.231903	1.53135
	Sgta	-0.253851	1.1666
	Atp2b4	-0.174291	0.935701
	Eif2b2	-0.176253	0.873029
	Cyld	-0.19803	1.40947
	Tsta3	-0.18386	1.33383
	Katnbl1	-0.533671	1.38386
	Plekha2	-0.361083	1.2782
	Orc1	-0.0532054	0.275445
	Mapk1	-0.244178	1.66598
	Iap	-0.434567	2.10671
	Gem	-0.919073	2.40979
	Ddx41	-0.20035	0.975063
	Fez2	-0.660372	1.73647
	Rsl24d1	-0.0882751	0.226865
	Dennd10	-0.254557	1.11186
	Tbcb	-0.248743	1.30812
	Hjurp	-0.327444	1.10042
	Dph1	-0.339733	1.75177
	Seh1l	-0.198916	1.17834
	Rnf5	-0.295212	1.29922
	Fig4	-0.427927	2.35923
	Prkcsh	-0.150884	0.645785
	Bnip2	-0.583468	2.37455
	Sf3b1	-0.302904	1.66859
	Pgm3	-0.252416	1.60537
	Pcyt1a	-0.155597	0.591865
	Mrps23	-0.236786	1.38256
	Uqcrc1	-0.079293	0.437242
	Pigu	-0.35964	1.85146
	Fmnl1	-0.29111	1.7385
	Mycbp2	-0.256343	1.54289
	Pbdc1	-0.290022	1.55792
	Pgm1	-0.168063	0.925343
	Glmn	-0.270717	1.46788
	Papolg	-0.284599	0.781124
	Cycs	-0.326253	2.03968
	Ripk3	-0.279708	0.951832
	Usp5	-0.199343	1.07299
	Rps29	-0.426035	1.3435
	Nemp1	-0.272686	1.91537
	Lipt1	-0.153863	0.807829
	Med18	-0.365323	1.85869
	Rgs19	-0.260808	1.82441
	Rnaset2a;Rnaset2b	-0.44662	1.77409
	Mrpl3	-0.235251	1.50049
	Rbm17	-0.119283	0.632254
	Rcc2	0.0254254	0.122637
	Endog	-0.255258	1.59404
	Kif13b	-0.302324	1.17433
	Ubtf	-0.136307	0.95079
	Ube2z	-0.203884	1.0389
	Spag7	-0.18456	0.652389
	Txn	-0.185306	1.32091
	Ociad1	-0.140128	0.928941
	Yipf3	-0.240716	1.39589
	Rab9a	-0.23251	1.35085
	Ppfia1	-0.290269	1.87388
	Slc16a6	-0.995694	1.89866
	Mak16	-0.174841	0.531619
	Osbp	-0.219271	0.988629
	Mdc1	-0.144631	0.653892
	Rps10	-0.461025	1.83107
	Gsk3a	-0.272122	1.75119
	Pdp2	-0.085155	0.323833
	Lrrfip1	-0.136572	0.615685
	Reep5	-0.495321	1.83476
	N4bp1	-0.264965	1.49274
	Hacd3	-0.380227	1.655
	Prpf39	-0.290151	1.55796
	Ppp6c	-0.292173	1.57292
	Elp3	-0.286769	1.292
	Mtch2	-0.361878	1.88065
	Raph1	-0.228777	1.25218
	Nfxl1	-0.672528	1.46331
	Ddx6	-0.222899	1.40814
	Soat1	-0.534812	1.61229
	Snrpa	-0.10544	0.580321
	FAM120A	-0.191898	1.08485
	Xab2	-0.110353	0.716388
	Znf598	-0.407958	2.66838
	Rbmxl1	-0.137601	0.985293
	Smap	-0.041827	0.169745
	Acsl5	-0.298612	1.82754
	Rbm26	-0.0451481	0.124471
	Mcm2	-0.0870338	0.534293
	Sipa1l1	-0.408961	1.8077
	Cinp	-0.213144	0.83973
	Adam10	-0.200602	1.21176
	Taf1c	-0.257346	1.26444
	Txnrd2	-0.270352	1.58742
	Telo2	-1.15055	3.13179
	Lpgat1	-0.530833	2.19883
	Prpf3	-0.200115	1.06898
	Pinx1	0.053052	0.206814
	Fgfr1op2	-0.265741	1.60069
	Mtrex	-0.27767	1.46683
	Snrpg	-0.27855	1.47467
	Rab21	-0.202765	1.19377
	Gcc2	0.232094	0.62127
	Odr4	-0.279256	1.4532
	Ubr2	-0.40197	1.94462
	Tomm20	-0.25492	0.884771
	Stag1	-0.23779	1.44748
	Kpna3	-0.400519	1.84993
	Mcl1	-0.180162	0.677446
	Ccdc174	-0.126683	0.572321
	Trp53i11	0.0449771	0.197411
	Cdv3	-0.144579	0.518632
	Ncoa5	-0.203782	1.29224
	Gne	-0.160135	0.701551
	Erc1	-0.362178	1.26806
	Mrpl18	-0.070227	0.366632
	Spcs2	-0.261884	1.66654
	Ccny	-0.401601	1.95054
	Vdac1	-0.167041	1.1515
	Serpinb1a	-0.791868	2.32869
	Surf1	-0.0589428	0.263207
	Galk1	-0.19175	1.22228
	Rtn4	-0.440731	1.83047
	Cast	-0.443071	1.48732
	Pip4k2c	-0.40228	1.59594
	Sik3	-0.456744	2.39564
	Rexo4	-0.0726733	0.426112
	Ppp2r2a	-0.312665	1.69768
	Mis18a	-0.167916	1.00341
		-0.21312	1.3971
	Dnajc16	-0.474792	1.38496
	Wbp2	-0.271354	1.42952
	Def6	-0.118104	0.722835
	Rpp30	-0.401765	1.82176
	Sephs1	-0.232865	1.52433
	Gpr68	-0.417357	1.59732
	Rbm42	-0.289564	1.74376
	Thumpd3	-0.185785	1.18518
[truncated: 5,518 more rows]

## Sheet: 4C
	Estimated protein copies per cell
		WT			Pim dKO
	TBX21	4316	3624	4447	6796	6376	5686
	TCF1 (Tcf7)	1593	1160	1395	1532	1591	1159

## Sheet: 4D
	Estimated protein copies per cell
		WT			Pim dKO
	Slc2a1	52209	44026	40895	23048	29574	31591
	Slc2a3	42797	45067	36723	17053	28750	25768

## Sheet: 4E
	Gene Name	IL2_dKO_v_WT_log2FC_all_prot	IL2_dKO_v_WT_-log10_p.val.unadjusted_all_prot	IL2_dKO_v_WT_-log10_p.val.unadjusted_cholesterol_biosynthesis_nonDE_prot (i.e. FC<1.5 and/or q>0.05)	IL2_dKO_v_WT_-log10_p.val.unadjusted_cholesterol_biosynthesis_DE_prot (i.e. FC>1.5 and q<0.05)		dotted line qvalue = 0.05 at unadjusted p-value = 1
	A2m	-0.186492	0.234425
	Aaas	-0.51157	1.40896
	Aacs	-0.314219	1.44627
	Aagab	-0.45767	1.46038
	Aak1	-0.159698	0.783177
	Aamdc	0.116743	0.281116
	Aamp	-0.326008	1.93697
	Aar2	-0.106273	0.0610466
	Aars1	-0.4036	1.55224
	Aars2	-0.327117	0.110803
	Aarsd1	-0.349212	1.49665
	Aasdhppt	-0.511476	2.64143
	Aatf	-0.0990291	0.564564
	Abca7	0.426817	0.50393
	Abcb10	0.0441795	0.0769597
	Abcb1a	-0.202584	1.29901
	Abcb1b	-0.011966	0.0224446
	Abcb7	-0.201732	1.09529
	Abcb8	-0.325722	1.81992
	Abcb9	-0.174092	0.206863
	Abcc1	-0.256122	0.732287
	Abcc4	-0.243919	0.806422
	Abcd1	-0.0337236	0.103711
	Abcd3	-0.249938	1.07693
	Abce1	-0.329567	1.85242
	Abcf1	-0.217876	1.2843
	Abcf2	-0.26369	1.31954
	Abcf3	-0.209639	1.26059
	Abcg3	-0.399512	0.663855
	Abhd10	-0.232687	0.60215
	Abhd11	-0.397577	1.16279
	Abhd12	-0.405008	1.67342
	Abhd13	-0.535097	2.03823
	Abhd14b	-0.213557	0.48326
	Abhd15	-0.282929	0.98659
	Abhd16a	-0.0708404	0.340216
	Abhd17a	-1.13566	1.60858
	Abhd17b	-0.615161	1.5967
	Abhd5	-0.459362	0.882926
	Abhd6	-0.550003	1.10888
	Abi1	-0.103761	0.592881
	Abi3	-0.308173	1.2735
	Abitram	-0.251292	1.39246
	Ablim1	-0.176232	1.08505
	Abr	-0.395612	1.41472
	Abracl	-0.869929	1.42617
	Abraxas1	-0.969786	0.97178
	Abraxas2	-0.142786	0.79627
	Abt1	-0.0295809	0.0787674
	Acaa1a	-0.148157	0.881325
	Acaa2	-0.12697	0.867521
	Acaca	-0.281306	1.66556
	Acad10	-0.289821	0.59486
	Acad11	-0.309225	0.763158
	Acad8	0.175138	0.626142
	Acad9	-0.112537	0.694309
	Acadl	-0.303333	1.8221
	Acadm	-0.00831187	0.0394363
	Acads	-0.107839	0.647235
	Acadsb	-0.0775967	0.0883698
	Acadvl	-0.11039	0.538899
	Acap1	-0.293231	1.82591
	Acap2	-0.308688	1.82868
	Acat1	-0.226846	1.18961
	Acat2	-0.300429	1.59815
	Acbd3	-0.136223	0.161664
	Acbd5	-0.061893	0.121387
	Acbd6	-0.502066	2.53516
	Acd	-0.363622	0.959686
	Acin1	-0.124461	0.825897
	Acly	-0.357082	1.71639
	Aco1	-0.355868	1.4707
	Aco2	-0.151232	0.902633
	Acot11	-0.611533	1.7834
	Acot13	-0.215812	0.820434
	Acot2	-0.346082	0.961257
	Acot7	-0.388438	1.92481
	Acot8	-0.232065	0.905083
	Acot9	-0.298764	1.61247
	Acox3	0.15622	0.403799
	Acp1	-0.304044	1.74393
	Acp3	-1.91199	1.84108
	Acp5	-0.487847	1.24916
	Acp6	-0.0317419	0.0823689
	Acsf2	-0.0660178	0.16468
	Acsf3	-0.150968	1.08509
	Acsl1	-0.245454	0.927328
	Acsl3	-0.306839	1.26687
	Acsl4	-0.514656	2.01525
	Acsl5	-0.298612	1.82754
	Acss1	0.462362	1.04956
	Acss2	-0.526779	0.793962
	Acta1	-0.512887	2.17323
	Actb	-0.550574	2.25674
	Actbl2	-0.288952	0.984273
	Actc1	-0.368208	1.65496
	Actg1	-0.510494	1.33835
	Actl6a	-0.10529	0.723053
	Actn1	-0.334869	2.08162
	Actn4	-0.307365	1.74426
	Actr10	-0.370042	1.8519
	Actr1a	-0.148562	0.729328
	Actr1b	-0.318326	1.96518
	Actr2	-0.221236	1.46796
	Actr3	-0.274759	1.42907
	Actr5	-0.213301	0.739791
	Actr6	-0.254441	1.05478
	Actr8	-0.350665	1.51713
	Acvrl1	-0.603743	0.947888
	Acy1	-0.342688	1.98095
	Acyp1	-0.0734721	0.207535
	Ada	-0.179093	1.22633
	Adam10	-0.200602	1.21176
	Adam17	-0.442752	2.23842
	Adam19	-0.374471	1.51245
	Adam8	-0.972393	1.6752
	Adap1	-0.307723	1.13368
	Adar	-0.309602	1.82799
	Adat1	-0.125218	0.313174
	Adat2	-2.43332	0.782718
	Adck1	-0.721255	1.26735
	Adck5	-0.17301	0.181632
	Adcy3	-1.58481	2.99096
	Adcy7	-0.56732	1.52733
	Add1	-0.102251	0.723429
	Add3	-0.00807003	0.031757
	Adgre5	0.268333	0.857471
	Adh5	-0.151477	0.892811
	Adi1	-0.218337	0.981675
	Adk	-0.122123	0.680734
	Adnp	-0.0206839	0.0872346
	Adnp2	-0.0910163	0.437711
	Ado	-0.0585762	0.216607
	Adpgk	-0.30628	1.99742
	Adprh	-0.0173597	0.0800254
	Adprm	-0.482515	2.45828
	Adprs	-0.0765266	0.343058
	Adrm1	-0.233834	1.25899
	Adsl	-0.316187	1.44304
	Adss1	-0.585836	0.949321
	Adss2	-0.0526677	0.221759
	Aebp2	-0.163833	0.719171
	Aen	-0.510131	2.04856
	Afdn	0.461403	0.263789
	Afg3l1	-0.336108	1.89809
	Afg3l2	-0.249987	1.73887
	Afmid	-0.153414	1.07431
	Aftph	1.11012	0.98368
	Aga	-0.272	1.51053
	Agap2	-0.234651	1.18859
	Agap3	-0.718119	0.644615
	Agfg1	-0.143832	0.668776
	Agfg2	-0.274413	1.5261
	Aggf1	-0.043591	0.149982
	Agk	-0.211967	1.15769
	Agl	-0.829407	1.5102
	Ago2	-0.34795	1.9621
	Agpat1	-0.0804927	0.277832
	Agpat3	-0.435371	2.32401
	Agpat4	-0.997832	0.882321
	Agpat5	-0.328639	1.3484
	Agps	-0.241391	1.49783
	Ahctf1	-0.134863	0.700993
	Ahcy	-0.219568	1.3215
	Ahcyl1	-0.0151455	0.0310184
	Ahcyl2	-0.11532	0.639933
	Ahdc1	-0.199329	0.672848
	Ahnak	-0.309391	1.54432
	Ahnak2	-1.10706	1.48464
	Ahsa1	-0.170661	1.13661
	Ahsa2	-0.184357	0.647636
	Aida	-0.919911	3.77547
	Aifm1	-0.159432	0.796468
	Aim2	-0.735389	2.63336
	Aimp1	-0.239328	1.40654
	Aimp2	-0.287368	1.66346
	Aip	-0.247058	1.40782
	Ak2	0.00349669	0.0147229
	Ak3	-0.0597644	0.272558
	Ak4	-0.291852	1.27282
	Ak6	-0.159237	0.647761
	Akap1	-0.538529	2.38586
	Akap10	-1.24448	1.31382
	Akap11	-0.216912	0.478248
	Akap13	-0.100496	0.681252
	Akap8	-0.0930481	0.350425
	Akap8l	0.249974	0.498647
	Akna	-0.249108	1.5374
	Akr1a1	-0.254985	1.6997
	Akr1b1	-0.263933	1.53696
	Akr1b10	-0.00566633	0.00859859
	Akr1c13	0.0756628	0.295848
	Akr1e2	0.0710377	0.241448
	Akr7a2	-0.139397	0.968211
	Akt1	-0.186538	1.18675
	Akt1s1	-0.288941	1.08833
	Akt2	-0.394173	2.22798
	Aktip	-1.09528	1.6433
	Alad	-0.718631	2.22836
	Alb	0.18752	0.55024
	Alcam	-0.459847	2.63756
	Aldh16a1	-0.12832	0.623656
	Aldh18a1	-0.364103	1.67613
	Aldh1b1	-0.0943891	0.224853
	Aldh2	-0.44025	0.35715
	Aldh3a2	-0.191141	0.94244
	Aldh4a1	-0.0216859	0.0621135
	Aldh7a1	-0.394307	1.35701
	Aldh9a1	-0.154514	0.927892
	Aldoa	-0.375381	1.53124
	Aldoc	-0.301513	0.917874
	Alg1	0.0662918	0.14585
	Alg10b	-0.386171	1.23591
	Alg11	-0.334736	1.52505
	Alg2	-0.43194	1.69392
	Alg3	-0.53109	1.97977
	Alg5	-0.286798	1.61686
	Alg8	-0.24355	0.828379
	Alg9	-0.161527	0.339432
	Alkbh3	-0.325524	1.54062
	Alkbh5	-0.241618	1.3603
	Alkbh6	-0.254558	1.15272
	Alkbh8	-0.436072	0.538228
	Alyref	0.0350819	0.0924153
	Ambra1	-0.226759	1.12303
	Amdhd2	-0.192497	1.34425
	Amfr	-0.296695	1.44804
	Ammecr1l	-0.324897	1.11502
	Ampd2	-0.141505	0.250776
	Anapc1	-0.240283	1.62591
	Anapc11	-0.297346	0.705313
	Anapc2	-0.274761	1.63674
	Anapc4	-0.341232	2.2244
	Anapc5	-0.0761928	0.158071
	Anapc7	-0.253826	0.524842
	Angel2	-0.227942	0.486684
	Ankfy1	-0.571146	1.57562
	Ankhd1	-0.411155	2.15641
	Ankle2	-0.262114	1.35491
	Ankmy2	-0.420053	1.69417
	Ankrd10	-0.177644	0.986154
	Ankrd11	-0.247185	0.854652
	Ankrd13a	-0.370103	2.21149
	Ankrd17	-0.473249	2.47254
	Ankrd28	-0.311169	1.55898
	Ankrd44	-0.326436	1.81326
	Ankrd46	-0.100306	0.085593
	Ankrd49	-0.229863	0.565689
	Ankrd52	-0.522638	1.84412
	Ankrd54	-0.194845	0.296144
	Anks1a	-0.414412	1.65886
	Ankzf1	-0.0494363	0.218009
	Anln	-0.300546	0.722603
	Ano10	-0.391493	1.48591
	Ano6	-0.248364	1.55467
	Anp32a	-0.00681476	0.0236741
	Anp32b	-0.0998423	0.339115
	Anp32e	-0.153208	0.667535
	Antkmt	-0.0918648	0.272581
	Anxa1	-1.06467	1.96141
	Anxa11	-0.219241	1.40444
	Anxa2	-0.502952	2.03198
	Anxa4	-0.213775	0.589409
	Anxa5	-0.754232	2.52439
	Anxa6	-0.279648	1.5668
	Anxa7	-0.440217	2.14831
	Ap1b1	-0.270686	1.69583
	Ap1g1	-0.310347	1.93972
	Ap1g2	0.0391472	0.143362
	Ap1m1	-0.107256	0.638898
	Ap1s1	-0.188924	1.22225
	Ap1s2	0.000684835	0.000764272
	Ap1s3	-0.428691	1.53501
	Ap2a1	-0.332387	1.96971
	Ap2a2	-0.444578	2.34072
	Ap2b1	-0.276572	1.66087
	Ap2m1	-0.34399	1.89019
	Ap2s1	-0.229161	0.927428
	Ap3b1	-0.3826	1.95541
	Ap3d1	-0.39839	1.79322
	Ap3m1	-0.629417	2.46311
	Ap3s1	-0.41771	2.16216
	Ap4b1	-1.01789	2.22916
	Ap4e1	-0.262577	0.754876
	Ap4m1	-0.325244	1.33341
	Ap4s1	-0.400787	1.55101
	Ap5b1	0.280885	0.490557
	Ap5m1	-0.457112	1.21884
	Ap5z1	-0.357363	1.8815
	Apaf1	-0.339823	1.89063
	Apbb1ip	-0.36143	1.97175
	Apeh	-0.291198	1.67996
	Apex1	-0.248862	1.38658
	Api5	-0.183811	1.33178
	Apip	-0.336163	1.92311
	Apmap	-0.393199	0.893879
	Apoa1	0.182613	0.669469
	Apob	-0.64736	2.11433
	Apobec3	-0.257755	1.5406
	Apobr	-0.585358	2.04379
	Apoo	-0.270888	1.6514
	Apool	0.0532186	0.191848
	Appbp2	-0.743938	1.35667
	Appl1	-0.0831862	0.312475
	Appl2	-0.785161	2.0911
	Aprt	-0.426901	1.8806
	Aptx	-0.144637	0.938904
	Aqr	-0.286532	1.74851
	Araf	-0.358936	2.25804
	Arap1	-0.360028	0.675089
	Arap2	-0.349922	0.733257
	Arcn1	-0.320271	1.89546
	Arf1	-0.355254	2.07261
	Arf4	-0.248039	1.68284
	Arf5	-0.158298	0.847973
	Arf6	-0.370117	1.69468
	Arfgap1	-0.212969	0.934288
	Arfgap2	-0.231899	1.38833
	Arfgap3	-0.476932	1.7245
	Arfgef1	-0.48927	1.83991
	Arfgef2	-0.43406	1.82708
	Arfgef3	-0.749631	1.86214
	Arfip1	-0.294737	1.17927
	Arfip2	-0.279562	1.33879
	Arfrp1	-0.23518	0.938241
	Arglu1	-0.223018	1.61978
	Arhgap1	-0.291343	1.50024
	Arhgap11a	-0.0486809	0.0905101
	Arhgap12	-0.288725	0.19483
	Arhgap15	0.115572	0.661684
	Arhgap17	-0.377333	2.51933
	Arhgap18	-0.381602	1.9279
	Arhgap19	0.139426	0.576731
	Arhgap21	-0.303497	1.53658
	Arhgap25	-0.0416042	0.130015
	Arhgap26	-0.0789771	0.434629
	Arhgap27	-0.0734802	0.380878
	Arhgap30	-0.180041	0.926705
	Arhgap4	-0.292301	1.80941
	Arhgap45	-0.19258	1.38057
	Arhgap9	-0.183324	1.10497
	Arhgdia	-0.208252	1.06046
	Arhgdib	-0.125913	0.78486
	Arhgef1	-0.222124	1.47846
	Arhgef1	-0.172074	0.126256
	Arhgef18	-0.202575	0.69293
	Arhgef2	-0.346806	1.9915
	Arhgef6	-0.276281	1.63706
	Arhgef7	-0.239267	1.85484
	Arid1a	0.319824	0.453549
	Arid1b	-0.0761926	0.294421
	Arid2	0.150954	0.0786648
	Arid3a	-0.318238	1.01195
	Arid4a	-0.101402	0.552099
	Arid4b	0.00669408	0.0183449
	Arid5a	0.00788375	0.0377866
	Arih1	-0.287743	1.56667
	Arih2	-0.306386	2.0258
	Arl1	-0.553647	1.58069
	Arl14ep	-0.33966	1.8854
	Arl2	-0.48962	1.38246
	Arl2bp	-0.0494752	0.158454
	Arl3	-0.324702	1.62973
	Arl4c	-0.625384	1.28927
	Arl5a	-0.384303	1.6277
	Arl6	-0.456847	0.99542
	Arl6ip1	-0.228644	1.57344
	Arl6ip4	-0.130954	0.67877
	Arl6ip5	-0.310526	1.78458
	Arl6ip6	0.12715	0.522688
	Arl8a	-0.49056	1.8124
	Arl8b	-0.351934	1.08883
	Armc1	-0.0835154	0.373806
	Armc10	-0.113479	0.606585
	Armc6	-0.431906	2.17092
	Armc8	-0.266121	1.21223
	Armh3	-0.310323	0.835616
	Armt1	-0.43807	2.15104
	Arnt	-0.316382	0.770604
	Arpc1a	-0.182033	0.884923
	Arpc1b	-0.372183	1.8151
	Arpc2	-0.27869	1.83614
	Arpc3	-0.317981	1.57925
	Arpc4	-0.237802	1.37671
	Arpc5	-0.205295	1.2227
	Arpc5l	-0.29647	1.54063
	Arpp19	-0.24388	1.58475
	Arrb1	-0.581538	1.68916
	Arrb2	-0.336121	1.60945
	Arrdc1	-0.373567	1.25854
	Arsb	-0.31652	1.79547
	Arxes1;Arxes2	-0.272704	1.77434
	Asah1	-0.545159	1.91319
	Asap1	0.354255	0.957866
	Asb2	-0.417233	1.30961
	Asb3	-0.762779	1.80036
	Asb6	-0.59306	2.21087
	Ascc1	-0.340777	1.6157
	Ascc2	-0.396148	2.02884
	Ascc3	-0.595819	2.14462
	Asf1a	-0.0859142	0.165829
	Asf1b	0.0777062	0.483375
	Ash2l	-0.0799636	0.41142
	Asl	-0.624649	1.14304
	Asns	-0.793433	1.78307
	Aspm	-0.639556	2.51839
	Aspscr1	-0.116506	0.403921
	Asrgl1	-0.067338	0.293601
	Ass1	-0.258635	1.68621
	Asxl2	-0.447614	0.531512
	Atad1	-0.325254	1.89612
	Atad2	-0.106053	0.540199
	Atad2b	-0.0315707	0.0996485
	Atad3	-0.129978	0.956654
	Atad5	-0.0814894	0.482796
	Ate1	-0.241547	0.968472
	Atf2	-0.0831346	0.263199
	Atf7	-0.247447	1.19477
	Atf7ip	-0.225602	1.19856
	Atg101	0.153463	0.203318
	Atg12	-0.327802	0.502889
	Atg13	-0.588669	0.900179
	Atg16l1	-0.0895556	0.119442
	Atg16l2	-0.729017	1.63603
	Atg2a	-0.663708	1.22962
	Atg2b	-0.462386	1.81386
	Atg3	-0.326156	1.61984
	Atg4a	-0.343653	1.15425
	Atg4b	-0.381358	1.97056
	Atg5	-0.167197	0.756421
	Atg7	-0.331286	1.93434
	Atic	-0.0326013	0.155169
	Atl2	-0.138636	0.740744
	Atl3	-0.20183	1.43446
	Atm	-0.333775	1.79361
	Atn1	0.047271	0.170832
	Atox1	-0.426486	1.84139
	Atp10a	-0.425091	0.802014
	Atp11b	-0.339468	1.75127
	Atp11c	-0.15175	0.734316
	Atp13a1	-0.301758	1.59332
	Atp13a3	-0.74352	2.81146
	Atp1a1	-0.205947	1.08405
	Atp1b3	-0.0708411	0.226581
	Atp2a1	-0.836837	0.707372
	Atp2a2	-0.321486	1.75352
	Atp2a3	-0.149322	0.836107
	Atp2b1	-0.0584148	0.310726
	Atp2b4	-0.174291	0.935701
	Atp2c1	-0.575274	1.70647
	Atp4a	-0.312594	0.30416
	Atp5f1a	-0.1465	0.970174
	Atp5f1b	-0.166529	1.12795
	Atp5f1c	-0.114559	0.768029
	Atp5f1d	-0.184448	0.988727
	Atp5f1e	-0.049311	0.217091
	ATP5IF1	-0.123209	0.683273
	Atp5md	-0.0628079	0.285977
	Atp5me	-0.0494471	0.282909
	Atp5mf	-0.0867873	0.445907
	Atp5mg	-0.114804	0.635582
	Atp5pb	-0.165075	0.943403
	Atp5pd	-0.111383	0.676037
	Atp5pf	-0.259518	0.773973
	Atp5po	-0.206907	0.914119
	Atp6ap1	-0.441475	2.12846
	Atp6ap2	-0.312609	0.647331
	Atp6v0a1	-1.49693	1.63418
	Atp6v0a2	-0.413492	1.53522
	Atp6v0d1	-0.300417	0.57909
	Atp6v1a	-0.493633	1.88226
	Atp6v1b2	-0.423147	1.8651
	Atp6v1c1	-0.489358	2.02513
	Atp6v1d	-0.350601	1.59975
	Atp6v1e1	-0.318341	1.53092
	Atp6v1f	-0.48913	1.50434
	Atp6v1g1	-0.329056	1.54025
	Atp6v1h	-0.180597	0.594038
	Atp8b2	0.283	0.836225
	Atp8b4	0.187607	0.154098
	Atpaf1	0.0189853	0.0858997
	Atpaf2	-0.0308767	0.0993331
	Atr	-0.548907	0.982139
	Atrip	-0.570635	0.651934
	Atrx	-0.266138	0.585085
	Atxn1	-0.16586	0.440653
	Atxn10	-0.367727	2.10761
	Atxn2	0.580282	1.30319
	Atxn2l	-0.210412	1.18711
	Atxn3	0.22047	0.172527
	Atxn7l3	-0.270871	1.58287
	Auh	-0.17044	0.477064
	Aup1	-0.158673	0.524934
	Aurka	-0.252295	1.24057
	Aurkb	0.434151	0.579293
	Aven	-0.220714	1.11191
	Avil	-1.58726	1.95182
	Avl9	-0.198209	1.12944
	B2m	-0.308658	0.693238
	B3galt6	-0.501366	2.32755
	B3gat3	-0.840611	1.15256
	B4galnt1	-0.103262	0.645845
	B4galt1	-0.514636	1.29707
	B4galt5	-0.38447	0.742803
	B4galt7	-0.116748	0.399259
	Babam1	-0.143195	0.509088
	Babam2	-0.229011	1.2013
	Bach2	-0.53051	2.02425
	Bag1	-0.0818964	0.360782
	Bag2	-0.000877492	0.00162227
	Bag4	-0.310784	1.38833
	Bag5	-0.537188	1.18503
	Bag6	-0.2933	1.88634
	Baiap2	-0.371686	1.37883
	Bak1	-0.448019	1.77481
	Banf1	-0.47209	1.22784
	Banp	0.016721	0.0381659
	Bap18	-0.0947533	0.544144
	Bard1	0.0370669	0.114675
	Basp1	-0.579944	0.419882
	Bax	-0.0417913	0.181378
	Baz1a	-0.297044	1.75741
	Baz1b	-0.0481408	0.266554
	Baz2a	-0.0459829	0.102444
	Bcap29	-0.371479	2.07853
	Bcap31	-0.223928	1.469
	Bcas2	-0.184675	0.810501
	Bcas3	-0.0309736	0.142534
	Bcat1	-0.495478	1.63551
	Bcat2	-0.192757	0.833417
	Bccip	-0.2424	1.79022
	Bckdha	0.0967969	0.387749
	Bckdhb	0.254717	0.170696
	Bckdk	-0.237284	0.579808
	Bcl10	-0.235796	1.24095
	Bcl11b	0.309915	1.54653
	Bcl2	-0.402219	1.11599
	Bcl2l1	-0.294389	1.42553
	Bcl2l11	0.0478528	0.186617
	Bcl2l13	-0.237331	1.20733
	Bcl7b	-0.033551	0.15089
	Bcl7c	-0.0545277	0.324293
	Bclaf1	-0.0502914	0.21972
	Bcor	-0.713886	1.1911
	Bcr	-0.661329	1.84904
	Bcs1l	-0.162268	0.298261
	Bdh1	-0.145714	0.849036
	Becn1	-0.52657	0.961539
	Bend3	0.0973633	0.156526
	Bet1	0.756457	0.443941
	Bhlhe40	-0.437244	2.0426
	Bicd2	-0.397249	2.02373
	Bicra	0.974162	3.71973
	Bid	-0.108845	0.429982
	Bin1	-0.298627	1.67291
	Bin2	-0.233094	0.875137
	Birc2	0.094509	0.18912
	Birc5	-0.128377	0.130506
	Birc6	-0.385943	1.73017
	Bles03	-0.0701706	0.230795
	Blm	-0.434736	1.86695
	Blmh	-0.238174	1.85061
	Bloc1s1	0.0674848	0.18085
	Bloc1s3	-0.389707	1.31306
	Bloc1s4	-0.392147	1.56843
	Bloc1s5	0.136455	0.199187
	Bloc1s6	-0.548837	0.840648
	Blvra	-0.343296	2.02764
	Blvrb	-0.32835	1.1398
	Bmp2k	-0.123441	0.401671
	Bms1	-0.191646	1.06881
	Bnip1	-0.680736	0.973014
	Bnip2	-0.583469	2.37455
	Bnip3	-0.154351	0.654374
	Bod1l	0.0691903	0.120364
	Bola1	-0.152947	0.842397
	Bola2	-0.508352	2.17714
	Bola3	-0.559041	3.02918
	Bop1	-0.0737597	0.181228
	Bora	-0.216729	0.196842
	Borcs5	-0.0727989	0.203037
	Bphl	-0.172464	0.741596
	Bpnt1	-0.130555	0.145154
	Bpnt2	-0.0193738	0.0845996
	Bptf	-0.364509	0.749061
	Brap	-0.155358	0.786253
	Brat1	-0.453991	2.34207
	Brca1	-0.126831	0.425372
	Brcc3	-0.162868	1.02193
	Brd1	-0.154188	0.735697
	Brd2	-0.0349217	0.161214
	Brd3	0.0866139	0.407188
	Brd4	0.0500779	0.207467
	Brd7	0.146231	0.493403
	Brd8	0.0981351	0.436985
	Brd9	0.0434155	0.139315
	Brf1	0.557541	0.292864
	Bri3bp	-0.162886	0.754987
	Brip1	-0.204735	0.478921
	Brix1	-0.07996	0.146274
	Brms1	0.101848	0.219638
	Brox	-0.190416	0.960026
	Brpf1	-0.282561	1.26666
	Brwd1	-0.491732	0.680742
	Bscl2	-0.830519	0.441032
	Bsdc1	1.4561	0.894262
	Bsg	-0.430969	1.54689
	Bspry	-0.424726	2.62563
	Bst2	-0.34398	1.4132
	Btaf1	-0.347459	1.86666
	Btbd1	-0.0818619	0.456729
	Btd	-0.244511	1.09514
	Btf3	-0.0791004	0.259694
	Btf3l4	0.0133358	0.0247784
	Bub1	0.246141	1.4444
	Bub1b	-0.0560925	0.304368
	Bub3	-0.106937	0.64938
	Bud13	-0.00621307	0.0198501
	Bud23	-0.164585	0.923166
	Bud31	-0.405209	1.80532
	Bysl	-0.274839	1.67693
	Bzw1	-0.254881	1.54845
	Bzw2	-0.203444	0.300074
	C1d	-0.440898	0.60764
	C1galt1	-0.354593	1.67167
	C1galt1c1	-0.447346	1.23235
	C1qbp	-0.0978363	0.613929
	C2cd2l	-0.578814	1.59602
	C2cd5	-0.206891	0.56111
	C3	-0.635156	1.4158
	C4b	-0.820873	1.56401
	Ca2	0.128161	0.202067
	Caap1	-0.0668806	0.206788
	Cab39	-0.309854	1.91995
	Cab39l	-0.364312	1.66021
	Cactin	-0.595982	0.921197
	Cacul1	-0.163382	0.628755
	Cacybp	-0.490051	0.530838
	Cad	-0.218673	1.30106
	Calhm2	-0.121586	0.0362461
	Calhm6	-0.527744	0.326465
	Calm1;Calm2;Calm3	-0.373998	0.892602
	Calr	-0.445207	1.97879
	Calu	-0.155479	0.688826
	Camk1d	0.208037	0.495133
	Camk2d	-0.0859359	0.25779
	Camk2g	-0.141396	0.900709
	Camk4	-0.258151	1.73515
	Cand1	-0.293685	1.32694
	Cand2	-0.432458	1.18949
	Canx	-0.21503	0.932685
	Cap1	-0.316213	2.11415
	Capg	-0.492539	1.78456
	Capn1	-0.202855	1.49465
	Capn2	-0.556219	2.12725
	Capn7	-0.507977	1.30218
	Capns1	-0.41323	1.45691
	Caprin1	-0.219822	1.22309
	Capza1	-0.239933	1.16432
	Capza2	-0.272451	1.42052
	Capzb	-0.25989	1.64965
	Card11	-0.2615	1.38235
	Card19	-0.47563	1.30907
	Card6	0.811379	1.47843
	Carhsp1	-0.562545	1.95343
	Carm1	-0.0618607	0.381523
	Carmil2	-0.243803	0.875011
	Carnmt1	-0.263593	1.50847
	Cars1	-0.477144	1.59667
	Cars2	-0.126754	0.123982
	Casc3	0.00934411	0.023209
	Casp1	-0.253128	1.44205
	Casp2	-0.0133152	0.0547823
	Casp3	-0.516834	1.5264
	Casp6	-0.241806	0.94569
	Casp7	-0.368713	1.38909
	Casp8	-0.334963	2.15589
	Casp8ap2	-0.335996	1.32943
	Casp9	-0.304059	0.581712
	Cast	-0.329339	1.83134
	Cat	-0.130509	0.704949
	Cbfb	-0.213893	1.34456
	Cbfb	-0.118998	0.772352
	Cbl	-0.1542	0.952937
	Cblb	-0.481431	2.33456
	Cbll1	0.0895038	0.262879
	Cbr1	-0.393799	1.47262
	Cbr4	-0.0787354	0.402306
	Cbwd1	-0.123848	0.324565
	Cbx1	-0.144646	0.491912
	Cbx3	0.0183121	0.0962161
	Cbx4	-0.118433	0.828459
	Cbx5	0.0345768	0.144966
	Cbx8	0.00211748	0.00314839
	Cc2d1a	-0.374382	1.27911
	Cc2d1b	-0.0913011	0.631676
	Ccar1	-0.15356	1.02975
	Ccar2	-0.152289	0.890345
	Ccdc102a	-0.266979	0.88511
	Ccdc115	-0.445822	1.34929
	Ccdc12	-0.0526641	0.302127
	Ccdc124	-0.252623	1.40798
	Ccdc127	-0.447481	0.667121
	Ccdc134	-0.293869	0.21979
	Ccdc137	0.0684161	0.163966
	Ccdc167	-0.254839	1.32013
	Ccdc174	-0.126683	0.572321
	Ccdc22	-0.192233	0.934527
	Ccdc25	-0.348914	1.75444
	Ccdc43	-0.579973	0.86539
	Ccdc47	-0.274771	1.73156
	Ccdc50	-0.0485537	0.192586
	Ccdc51	-0.317322	2.20707
	Ccdc58	-0.109342	0.490147
	Ccdc6	-0.27339	2.09711
	Ccdc61	-0.106261	0.729136
	Ccdc69	-0.0816712	0.196444
	Ccdc85c	0.100077	0.553937
	Ccdc86	-0.256332	1.16601
	Ccdc88b	-0.263484	1.53134
	Ccdc88c	-0.376165	1.45059
	Ccdc9	-0.0324637	0.13219
	Ccdc92	-0.661639	0.20498
	Ccdc93	-0.13056	0.909862
	Ccdc97	-0.416123	1.10025
	Ccl1	-0.127476	0.152271
	Ccl4	-0.898206	1.3166
	Ccm2	0.153059	0.654988
	Ccna2	-0.154936	0.811797
	Ccnb1	-0.158244	0.972163
	Ccnb2	-0.185927	0.958477
	Ccnc	-0.680025	2.06497
	Ccnd2	-0.641279	1.97165
	Ccnd3	-0.958803	0.875406
	Ccndbp1	-0.0192677	0.022935
	Ccne1	-0.507581	0.841924
	Ccnh	-0.613775	1.69654
	Ccnk	0.0871221	0.315758
	Ccnl1	-0.0400883	0.0785848
	Ccnl2	-0.319006	1.44174
	Ccnt1	-0.188467	1.01208
	Ccnt2	0.240551	0.282301
	Ccny	-0.401601	1.95054
	Ccr5	-0.745624	1.97499
	Ccs	-0.155421	1.03396
	Cct2	-0.265279	1.35315
	Cct3	-0.257245	1.51542
	Cct4	-0.259609	1.5344
	Cct5	-0.266993	1.60404
	Cct6a	-0.207818	1.35655
	Cct7	-0.29525	1.77871
	Cct8	-0.231806	1.41437
	Ccz1	0.452165	0.833682
	Cd160	-0.307342	1.79632
	Cd2	-0.0209666	0.0891499
	Cd226	-0.294992	1.03585
	Cd244	-0.87581	2.96348
	Cd247	-0.300426	1.64337
	Cd27	1.11147	0.94982
	Cd28	-0.245182	0.764783
	Cd2ap	-0.0941292	0.431359
	Cd2bp2	-0.0245048	0.0781403
	Cd37	-0.257181	1.08133
	Cd3d	-0.134576	0.580235
	Cd3e	-0.225739	1.3432
	Cd3g	-0.250303	1.55371
	Cd44	-0.195661	0.507169
	Cd47	-0.62781	1.76601
	Cd47	-0.222092	0.8733
	Cd48	-0.0559241	0.238632
	Cd5	-0.00648068	0.00506739
	Cd6	0.256361	0.18126
	Cd69	-0.670223	1.86412
	Cd82	-0.0357677	0.1125
	Cd84	-0.214777	0.932379
	Cd8a	-0.256432	1.45419
	Cd8b	-0.145962	1.01055
	Cd96	-0.30184	1.70252
	Cdan1	-0.157313	0.826499
	Cdc123	-0.377412	2.19925
	Cdc16	-0.257877	1.741
	Cdc20	-0.0172809	0.0916116
	Cdc23	-0.263053	1.53288
	Cdc26	-0.262392	0.736757
	Cdc27	-0.383156	1.06892
	Cdc34	-0.34605	1.82563
	Cdc37	-0.0440424	0.165309
	Cdc37l1	-0.427693	0.76031
	Cdc40	3.09e-05	9.63355e-05
	Cdc42	-0.328775	1.77992
	Cdc42se2	-0.266725	0.786199
	Cdc45	-0.250243	0.846716
	Cdc5l	-0.107695	0.614207
	Cdc73	-0.0962953	0.271166
	Cdca2	0.209127	1.09574
	Cdca3	-0.161035	0.242495
	Cdca5	0.409693	0.651837
	Cdca7	1.03832	0.660595
	Cdca7l	0.212294	0.690206
	Cdca8	0.105581	0.532493
	Cdh1	-0.656929	0.602825
	Cdipt	-0.302177	1.28723
	Cdk1	-0.105337	0.664603
	Cdk11b	-0.126103	0.646314
	Cdk12	-0.533658	0.492622
	Cdk13	-0.18675	0.576429
	Cdk17	-0.215227	0.92991
	Cdk19	-0.581165	0.638773
	Cdk2	-0.116013	0.66237
	Cdk2ap1	-0.448342	0.716114
	Cdk4	-0.0887973	0.410274
	Cdk5	-0.128076	0.564032
	Cdk5rap1	-0.373143	1.68244
	Cdk5rap2	-0.548471	0.145332
	Cdk5rap3	-0.426977	2.14082
	Cdk6	0.0503279	0.248807
	Cdk7	-0.208651	1.14314
	Cdk9	-0.325798	1.96716
	Cdkal1	-0.540027	1.75975
	Cdkn1a	-0.69692	1.26425
	Cdkn1b	0.310949	0.480259
	Cdkn2a	-1.08554	1.55698
	Cdkn2aip	0.0108097	0.0445004
	Cdkn2b	-0.753957	0.830059
	Cdkn2d	-0.384572	1.45028
	Cds2	-0.391499	1.94339
	Cdv3	-0.14458	0.518632
	Cdyl	-0.500537	1.94743
	Cdyl2	-0.366475	1.21656
	Cebpz	-0.279895	1.27672
	Cebpzos	-0.116592	0.403177
	Celf1	-0.157345	0.703947
	Celf2	-0.132818	0.796495
	Cemip2	-1.06427	1.53512
	Cenpa	-1.70635	1.18995
	Cenpc	0.074661	0.226551
	Cenpe	-0.210116	0.746555
	Cenpf	-0.178697	0.957372
	Cenph	-0.566418	1.12774
	Cenpi	-0.142065	0.696154
	Cenpk	-0.377297	1.15155
	Cenpl	0.447683	1.01142
	Cenpm	0.260932	0.272463
	Cenpp	0.453322	1.01895
	Cenpq	-1.08774	0.546715
	Cenps	0.241539	0.628586
	Cenpt	-0.296166	0.360173
	Cenpu	-0.156248	0.683822
	Cenpv	-0.21922	1.13364
	Cep120	-0.355768	1.13143
	Cep128	-1.69683	0.647585
	Cep131	0.669406	0.333375
	Cep152	-0.2401	0.792436
	Cep170	-0.267105	1.22772
	Cep192	-0.994912	0.989201
	Cep250	-0.446986	2.00701
	Cep41	-0.280322	1.69109
	Cep43	-0.100294	0.223967
	Cep55	-0.109991	0.625972
	Cep57	-0.15115	0.933685
	Cep63	-0.0250803	0.0476447
	Cep76	-0.405841	1.12637
	Cep85	-0.221288	0.247437
	Cep97	-0.143799	0.462973
	Cept1	-0.0954565	0.378882
	Cers2	-0.42898	1.71271
	Cers4	-0.1732	1.06772
	Cers5	-0.681725	2.32883
	Cert1	-0.209937	0.71354
	Cetn2	-0.223031	1.27941
	Cetn3	-0.103871	0.387059
	Cfap20	-0.170564	1.06783
	Cfap36	-0.396685	2.09907
	Cfdp1	-0.0193934	0.0634342
	Cfl1	-0.233789	1.51854
	Cfp	-1.39831	0.947703
	Cgas	-0.030165	0.109762
	Cggbp1	-0.00117671	0.00326991
	Chaf1a	-0.211647	1.66688
	Chaf1b	0.203649	0.200756
	Champ1	-0.0529579	0.240052
	Chchd1	0.00868311	0.0341607
	Chchd3	-0.134082	0.77074
	Chchd4	-0.575867	1.43597
	Chchd6	0.0426407	0.0158383
	Chd1	-0.210963	1.41092
	Chd1l	-0.299191	1.4019
	Chd2	-0.372192	1.20534
	Chd3	-0.208213	1.43496
	Chd4	-0.122526	0.865518
	Chd7	-1.67721	1.48656
	Chd8	-0.167155	0.973233
	Chek1	0.0843288	0.451098
	Cherp	-0.368499	1.93297
	Chfr	-0.458966	1.9231
	Chid1	-0.182069	0.409534
	Chm	-0.559322	2.01977
	Chmp1a	-0.122492	0.412209
	Chmp1b1	-0.00536029	0.0185901
	Chmp2a	-0.214899	1.07873
	Chmp2b	-0.00906838	0.00284482
	Chmp3	-0.248978	1.47906
	Chmp4b	-0.199466	1.1194
	Chmp5	-0.372631	1.96771
	Chmp6	0.0223798	0.0299813
	Chmp7	-0.474532	1.56887
	Chordc1	-0.197641	1.02174
	Chp1	-0.493447	2.54765
	Chrac1	-0.0578499	0.296062
	Chst12	1.71522	0.361056
	Chsy1	0.584392	1.2049
	Chtf18	-0.208181	1.05776
	Chtf8	-0.222393	0.984777
	Chtop	0.0482566	0.136135
	Chuk	-0.457233	1.79959
	Churc1	-0.14181	0.594385
	Ciao1	-0.36671	2.45064
	Ciao2a	-0.277453	1.07018
	Ciao2b	-0.390874	0.967139
	Ciao3	-0.351751	0.895268
	Ciapin1	-0.29738	1.66171
	Cib1	-0.589942	2.30589
	Cic	-0.601116	2.34382
	Cinp	-0.213145	0.83973
	Cip2a	-0.0858435	0.238183
	Cirbp	-0.180768	0.888003
	Cisd1	-0.358062	1.68837
	Cisd2	-0.232363	1.23686
	Cisd3	-1.19933	2.46254
	Cish	-0.300373	0.977162
	Cit	-0.0367287	0.186939
	Ciz1	0.38946	0.735516
	Ckap2	-0.160387	0.475399
	Ckap2l	0.330168	0.564351
	Ckap5	-0.171999	1.07615
	Ckb	-0.196199	0.727049
	Cks1b	-0.0838016	0.33145
	Cks2	-0.00157473	0.00441192
	Clasp1	-0.218238	1.39429
	Clasp2	-0.34328	0.67945
	Clasp2	-0.224118	1.05749
	Clasrp	0.104054	0.36766
	Clcc1	-0.165539	0.594608
	Clcn3	-0.273247	1.61423
	Clcn5	-0.655789	1.84092
	Cldnd1	-0.388972	1.40352
	Clec2d	-0.245912	1.86331
	Clic1	-0.2183	1.15221
	Clic4	-0.477672	2.0191
	Clint1	-0.0407085	0.154253
	Clip1	-0.534077	1.16836
	Clk1	-0.60818	1.34195
	Clk3	-0.263784	1.53483
	Cln5	-0.341287	1.43296
	Clns1a	-0.324151	1.40723
	Clp1	-0.239809	1.51944
	Clpb	-0.590887	2.07525
	Clpp	-0.130623	0.500523
	Clptm1	-0.227991	1.06329
	Clptm1l	-0.594714	1.24411
	Clpx	-0.306409	1.13894
	Clspn	0.126909	0.588926
	Clta	-0.177479	0.76031
	Cltb	-0.200275	0.872807
	Cltc	-0.37733	2.02395
	Cluh	-0.278856	1.61775
	Clybl	0.257111	1.0229
	Cmah	2.88474	1.33181
	Cmas	-0.363643	1.56039
	Cmc1	-0.205192	1.33412
	Cmc2	-0.450709	2.42597
	Cmip	-0.694875	1.23364
	Cmpk1	-0.469234	1.96481
	Cmpk2	0.9165	0.9121
	Cmss1	-0.0551942	0.251642
	Cmtm6	-0.428023	1.41771
	Cmtm7	-0.301631	1.60127
	Cmtr1	-0.224514	1.45212
	Cnbp	-0.583722	2.08455
	Cndp2	-0.182201	1.28933
	Cnep1r1	-0.214108	0.463413
	Cnn2	-0.213197	1.27563
	Cnnm3	-0.217883	1.05981
	Cnot1	-0.265824	1.84884
	Cnot10	-0.275928	1.83695
	Cnot11	-0.314694	0.869418
	Cnot2	-0.0916842	0.379054
	Cnot3	-0.158865	0.935416
	Cnot4	-0.324162	0.920786
	Cnot6	-0.228724	0.362878
	Cnot6l	-0.221815	1.21242
	Cnot7	-0.289858	1.29279
	Cnot8	-0.284688	1.49824
	Cnot9	-0.355882	2.43842
	Cnp	-0.27162	1.82927
	Cnpy2	-0.221229	1.52244
	Cnpy3	-0.606225	2.18634
	Cnpy4	-0.317134	1.33218
	Cnrip1	-0.288255	0.833107
	Cnst	-0.12942	0.211424
	Cntrl	-0.378776	0.976047
	Cntrob	-0.845987	0.731304
	Coa3	-0.117553	0.502385
	Coa6	-0.0365068	0.106647
	Coa7	0.162869	0.535004
	Coasy	-0.251467	1.19933
	Cobll1	-0.235998	0.682641
	Cog1	-0.0415572	0.113022
	Cog2	0.0743983	0.0679578
	Cog3	-0.351406	2.06192
	Cog4	-0.136164	0.674259
	Cog5	-0.126078	0.593358
	Cog6	-0.135297	0.142582
	Cog7	0.120207	0.285075
	Cog8	-0.29542	1.63925
	Coil	-0.230502	0.870662
	Col1a1	-0.495706	1.97965
	Col4a1	0.114764	0.113612
	Colgalt1	-0.276763	1.58498
	Commd1	-0.345028	2.21711
	Commd10	-0.219398	1.29059
	Commd2	-0.45014	1.94619
	Commd3	-0.672022	1.93419
	Commd4	-0.14216	0.284597
	Commd5	-0.568043	1.59931
	Commd6	-0.351338	1.29163
	Commd7	-0.491439	1.16439
	Commd8	0.333846	1.32656
	Commd9	-0.401857	1.44248
	Comt	-0.409005	1.07125
	Comtd1	-0.139237	0.266286
	Copa	-0.356932	1.9196
	Copb1	-0.43543	2.28549
	Copb2	-0.271748	1.73104
	Cope	-0.351014	1.33253
	Copg1	-0.403236	2.48633
	Copg2	-0.479527	2.37233
	Cops2	-0.346217	1.97319
	Cops3	-0.321065	1.87696
	Cops4	-0.278255	1.80804
	Cops5	-0.39201	1.92321
	Cops6	-0.33118	1.99802
	Cops7a	-0.153225	0.787901
	Cops7b	-0.246821	1.73039
	Cops8	-0.181782	0.46383
	Copz1	-0.354363	0.571291
	Coq3	-0.0135551	0.0498458
	Coq5	-0.212794	0.257321
	Coq6	0.934413	1.30872
	Coq7	-0.233832	1.11221
	Coq9	-0.169578	0.465348
	Coro1a	-0.111571	0.800981
	Coro1b	-0.20789	1.22953
	Coro1c	-0.246972	1.49072
	Coro2a	-0.0209984	0.0680232
	Coro7	0.0908259	0.399307
	Cotl1	-0.323656	1.71324
	Cox15	-0.229118	1.23308
	Cox16	-0.113532	0.577725
	Cox17	-0.717297	1.42746
	Cox20	-0.0732677	0.231306
	Cox4i1	-0.0820617	0.446857
	Cox5a	-0.2972	0.749991
	Cox5b	-0.341389	0.585181
	Cox6a1	-0.451477	0.763111
	Cox6b1	-0.02591	0.122129
	Cox6c	0.026485	0.117325
	Cox7a2	-0.419403	2.35018
	Cox7a2l	-0.217159	1.25667
	Cox7c	-0.17671	0.714119
	Cpb2	-0.217414	0.971109
	Cpeb4	-0.988838	2.13546
	Cpne1	-0.264065	1.4342
	Cpne2	-0.309654	0.139751
	Cpne3	-0.114886	0.607241
	Cpox	-0.163288	0.928437
	Cpped1	-0.52671	1.32229
	Cpsf1	-0.153314	0.404946
	Cpsf2	-0.21681	1.597
	Cpsf3	-0.155901	1.11065
	Cpsf4	-0.172555	0.716011
	Cpsf4	-0.145234	0.938749
	Cpsf6	-0.110659	0.583602
	Cpsf7	-0.132762	0.905908
	Cpt1a	0.0588088	0.254028
	Cpt2	-0.0516052	0.138524
	Cr1l	-0.395464	2.55309
	Cradd	-0.0821493	0.13484
	Crbn	0.0938911	0.215377
	Crcp	-1.02799	0.895784
	Creb1	0.112046	0.470916
	Crebbp	-0.191009	1.01814
	Creg1	-0.688486	2.33707
	Creld2	-0.342423	1.3847
	Crip1	0.141563	0.361812
	Crip2	0.00354996	0.0135234
	Cript	-0.127348	0.56957
	Crk	-0.266168	1.73419
	Crkl	-0.192661	1.0104
	Crlf2	-0.438318	2.99522
	Crlf3	-0.266065	1.48245
	Crmp1	-0.0127052	0.052811
	Crnkl1	-0.154249	1.13297
	Crocc	-0.772437	0.78407
	Crot	-0.4091	2.09369
	Crtam	-1.18795	0.513065
	Crtc2	0.184181	0.743964
	Crtc3	-0.175713	0.332833
	Cry1	-0.678527	2.00137
	Crybg1	-0.3695	1.79009
	Cryl1	-0.0429068	0.0767586
	Cryz	-0.078482	0.105876
	Cryzl1	-0.34807	1.52405
	Cs	-0.229035	1.06675
	Csde1	-0.240007	1.26345
	Cse1l	-0.166821	1.0018
	Csk	-0.0464219	0.230259
	Csnk1a1	-0.301341	1.74256
	Csnk1d	-0.16379	0.90589
	Csnk1g1	-0.363422	0.756882
	Csnk1g3	-0.186553	1.1879
	Csnk2a1	-0.296839	1.67298
	Csnk2a2	-0.266255	1.46256
	Csnk2b	-0.128684	0.523846
	Csrp1	-0.170169	0.751928
	Cst3	-0.180587	0.442563
	Cst7	0.0319202	0.0719764
	Cstb	-0.395037	0.189771
	Cstf1	-0.190888	1.0114
	Cstf2	-0.199489	0.733203
	Cstf2t	-0.14343	0.697759
	Cstf3	0.121028	0.587857
	Ctbp1	-0.0895948	0.35628
	Ctbs	-0.628911	2.20139
	Ctc1	-0.183138	0.959622
	Ctcf	0.000628352	0.00137864
	Ctdp1	-0.0795566	0.441376
	Ctdsp1	0.404193	0.566664
	Ctdspl2	-0.175039	0.959284
	Ctla2a	-0.534532	1.46745
	Ctla4	-0.525169	2.40922
	Ctnna1	-0.474297	1.49619
	Ctnnb1	-2.24423	0.935927
	Ctnnbl1	-0.159772	0.788356
	Ctps1	-0.303991	1.85087
	Ctps2	-0.165578	1.01869
	Ctr9	-0.234959	1.17179
	Ctsa	-0.146513	0.466718
	Ctsb	-0.297207	1.19242
	Ctsc	-0.234825	1.79253
	Ctsd	-0.609996	1.83928
	Ctss	0.441847	1.69195
	Ctsw	-0.304508	1.92351
	Ctsz	0.0553867	0.0563766
	Ctu1	-0.548476	2.41136
	Ctu2	-0.242609	1.41988
	Cul1	-0.239809	1.30499
	Cul2	-0.358754	2.11699
	Cul3	-0.270973	1.95136
	Cul4a	-0.288955	1.35846
	Cul4b	-0.313357	1.60431
	Cul5	-0.260166	1.79111
	Custos	-0.148696	0.769935
	Cuta	-0.473686	1.97752
	Cux1	-0.281467	1.35584
	Cwc15	-0.282339	1.18305
	Cwc22	-0.302253	1.94858
	Cwc25	-0.18571	1.20488
	Cwc27	-0.0253889	0.102366
	Cwf19l1	-0.245088	1.71971
	Cwf19l2	-0.142029	0.633639
	Cxcr3	0.955188	2.02631
	Cxcr4	0.00051958	0.000209134
	Cxcr6	-0.427602	1.43106
	Cxxc1	-0.0266872	0.122425
	Cyb5a	-0.259852	1.09851
	Cyb5b	-0.412212	1.6978
	Cyb5r1	-0.0829193	0.172252
	Cyb5r3	-0.240176	1.21606
	Cyb5r4	-0.235656	0.613933
	Cyba	-0.387805	1.67619
	Cybc1	-0.282966	1.29417
	Cyc1	-0.253888	1.75916
	Cycs	-0.326253	2.03968
	Cyfip1	-0.278832	1.59696
	Cyfip2	-0.288695	1.55118
	Cyhr1	-0.485483	0.859596
	Cyld	-0.19803	1.40947
	Cyp20a1	-0.457585	1.74336
	Cyp4f14	-0.352979	1.74083
	Cyp51a1	-0.40768	1.65443
	Cyria	-0.134294	0.72427
	Cyrib	-0.217266	1.38548
	Cyth1	-0.0196343	0.0362125
	Cyth4	-0.108982	0.633589
	Cytip	0.653001	0.949116
	Czib	-0.298098	1.99498
	D10Wsu102e	-0.123224	0.300102
	D6Wsu163e	-0.417162	2.98355
	D8Ertd738e	-0.394653	1.42945
	Dad1	-0.406388	1.54866
	Daglb	-0.957077	1.3314
	Dalrd3	-0.422962	0.774342
	Dap	-0.449444	0.855037
	Dap3	-0.156388	0.837831
	Dapk2	-0.175727	0.730171
	Dapk3	-0.268631	1.37054
	Dars1	-0.244533	1.41976
	Dars2	0.234353	0.716185
	Daxx	0.0940569	0.337199
	Dazap1	-0.138852	0.641047
	Dbi	-0.413118	1.31379
	Dbnl	-0.159475	1.0146
	Dbr1	-0.145518	0.666014
	Dbt	-0.464631	2.1026
	Dcaf1	-0.165268	0.979111
	Dcaf11	-0.574203	1.8078
	Dcaf13	-0.265716	1.75957
	Dcaf5	-0.282116	1.38946
	Dcaf7	-0.0140285	0.0520041
	Dcaf8	-0.160251	0.847122
	Dcakd	-0.377848	1.58175
	Dck	-0.146677	0.398956
	Dcp1a	-0.343723	1.48488
	Dcp1b	-0.421964	1.10314
	Dcp2	-0.828284	0.632115
	Dcps	-0.222332	1.09273
	Dctn1	-0.924606	0.36996
	Dctn2	-0.187937	1.11385
	Dctn3	-0.258338	1.75141
	Dctn4	-0.355817	1.26782
	Dctn5	-0.136593	0.467872
	Dctn6	-0.249456	1.47868
	Dctpp1	-0.503288	2.00975
	Dcun1d1	-0.267581	1.93444
	Dcun1d3	-0.837706	1.64088
	Dcun1d5	-0.0425089	0.16413
	Dcxr	0.769715	0.288072
	Dda1	-0.413408	2.75249
	Ddb1	-0.269579	1.89438
	Ddb2	0.0792112	0.460918
	Ddhd2	-0.555042	2.22919
	Ddi2	-0.125172	0.624247
	Ddost	-0.36766	1.56611
	Ddrgk1	-0.31505	1.25575
	Ddt	-0.263313	1.52715
	Ddx1	-0.251755	1.51762
	Ddx10	-0.25517	0.980818
	Ddx11	-0.340185	0.690569
	Ddx17	-0.246239	1.26641
	Ddx18	-0.32793	1.5831
	Ddx19a	-0.304555	1.51391
	Ddx19b	-0.493429	1.19935
	Ddx20	-0.235697	1.19827
	Ddx21	-0.252434	1.50969
	Ddx23	-0.175965	0.998933
	Ddx24	-0.313522	1.347
	Ddx27	-0.213503	1.09912
	Ddx28	-0.137815	0.437532
	Ddx31	-0.398142	0.95219
	Ddx39a	-0.200487	1.28069
	Ddx39b	-0.125289	0.753651
	Ddx3x	-0.301004	1.66157
	Ddx3y	-0.291079	1.26058
	Ddx41	-0.20035	0.975063
	Ddx42	-0.1063	0.632649
	Ddx46	-0.209215	1.19109
	Ddx47	-0.218968	1.67588
	Ddx49	-0.402426	1.70564
	Ddx5	-0.228938	1.62033
	Ddx50	-0.260507	0.413661
	Ddx51	-0.297242	1.23486
	Ddx52	-0.344133	1.11355
	Ddx54	-0.273743	1.38859
	Ddx55	-0.144827	0.365651
	Ddx56	-0.0770924	0.39193
	Ddx58	-0.885832	1.14619
	Ddx59	-0.303882	1.46334
	Ddx6	-0.222899	1.40814
	Decr1	-0.211667	1.09199
	Decr2	-0.731164	0.642051
	Def6	-0.118104	0.722835
	Degs1	-0.206654	0.764847
	Dek	0.0489777	0.193674
	Dennd10	-0.254557	1.11186
	Dennd11	-0.768697	2.13707
	Dennd1b	-0.250649	1.60207
	Dennd1c	-0.173175	0.179116
	Dennd2d	-0.40017	1.76302
	Dennd3	-0.263348	0.237357
	Dennd4a	-0.313091	1.50568
	Dennd4b	-0.310366	1.6769
	Dennd4c	-0.364976	1.65031
	Denr	0.0008993	0.00174015
	Depdc1b	-0.220342	0.727886
	Depdc5	-0.0769567	0.0573217
	Dera	-0.392323	2.44231
	Derl1	-0.480751	1.58534
	Derpc	-0.127729	0.711699
	Des	-0.964672	0.54202
	Desi1	-0.502244	2.5959
	Dffa	-0.12812	0.432219
	Dffb	0.547617	1.08818
	Dgat1	-0.392694	0.516047
	Dgcr8	-0.0724895	0.310221
	Dgka	-0.420568	1.9004
	Dgkh	-2.76156	1.09107
	Dgkz	0.13062	0.587018
	Dglucy	-0.0256098	0.0735554
	Dguok	-1.05847	0.785995
	Dhcr24	-0.552101	2.07481
	Dhcr7	-0.196435	1.35751
	Dhfr	-0.105773	0.667925
	Dhodh	-0.154927	1.05834
	Dhps	-0.312593	1.34438
	Dhrs1	-0.288151	1.70496
	Dhrs11	-1.0219	2.06301
	Dhrs13	-0.348768	1.07077
	Dhrs4	-0.0802306	0.490414
	Dhrs7	-0.086539	0.286935
	Dhrs7b	-0.161269	0.572513
	Dhrsx	-0.397569	1.21432
	Dhx15	-0.20206	1.34663
	Dhx16	-0.132575	0.883718
	Dhx29	-0.49747	1.73925
	Dhx30	-0.251778	1.55348
	Dhx33	-0.207776	1.13857
	Dhx34	-0.15909	0.886702
	Dhx35	-0.179367	1.23667
	Dhx36	-0.315397	1.24175
	Dhx37	-0.187245	1.35833
	Dhx38	-0.125231	0.727359
	Dhx40	-0.473199	0.827597
	Dhx57	-0.312449	0.685611
	Dhx58	-0.410695	1.02378
	Dhx8	-0.183062	0.92616
	Dhx9	-0.157644	1.0897
	Diablo	-0.0602723	0.0224873
	Diaph1	-0.311768	1.99047
	Diaph2	-0.126668	0.275627
	Diaph3	-0.189578	1.00791
	Dicer1	-0.207364	1.01872
	Dido1	-0.214243	1.32392
	Diexf	-0.372337	1.91802
	Dimt1	-0.223455	1.14364
	Dip2b	-0.209409	1.42266
	Dipk2a	-0.0570011	0.324527
	Dis3	-0.17989	1.11389
	Dis3l	-0.409409	1.40543
	Dis3l2	-0.286982	1.60493
	Dkc1	-0.109037	0.550621
	Dlat	-0.309165	1.7875
	Dld	-0.191035	1.12682
	Dlg1	-0.245099	1.09902
	Dlgap4	-0.44131	1.65738
	Dlgap5	-0.0294237	0.107113
	Dlst	-0.0434388	0.225332
	Dmac2	-0.334982	0.705937
	Dmap1	-0.227749	0.745373
	Dmxl1	-0.441774	1.89245
	Dna2	-0.395283	1.26876
	Dnaaf5	-0.398494	2.15294
	Dnaja1	-0.362349	1.41331
	Dnaja2	-0.242982	1.43391
	Dnaja3	-0.188482	1.17295
	Dnajb1	-0.188097	1.19401
	Dnajb11	-0.306028	1.30657
	Dnajb12	-0.124407	0.512876
	Dnajb4	-0.136333	0.395452
	Dnajb6	-0.244899	1.45664
	Dnajc1	-0.395326	1.73232
	Dnajc10	-0.600693	1.74854
	Dnajc11	-0.473377	1.32397
	Dnajc13	-0.343083	1.99404
	Dnajc15	-0.339638	1.11211
	Dnajc17	-0.337415	1.18744
	Dnajc19	-0.00932266	0.0323291
	Dnajc2	-0.174222	1.0797
	Dnajc21	-0.293998	1.50526
	Dnajc24	-0.336405	1.41686
	Dnajc3	-0.232083	1.14951
	Dnajc5	-0.39147	1.49064
	Dnajc7	-0.197255	1.21649
	Dnajc8	-0.138852	0.876917
	Dnajc9	0.0389539	0.153036
	Dnm1l	-0.540463	2.06363
	Dnm1l	-0.105481	0.246601
	Dnm2	-0.293275	1.42101
	Dnm3	-0.752257	1.9649
	Dnmt1	-0.0362083	0.196821
	Dnmt3a	-0.0532466	0.226372
	Dnmt3b	0.267599	0.656445
	Dnpep	-0.277818	1.42429
	Dnph1	0.0290413	0.123953
	Dnttip1	-0.258022	0.324989
	Dnttip2	-0.167379	1.16888
	Dock10	-0.65172	1.63875
	Dock10	-0.173683	1.20422
	Dock11	-0.129705	0.286282
	Dock2	-0.233822	1.60798
	Dock5	-0.627768	1.84386
	Dock8	-0.313547	1.82284
	Dock9	-0.234532	1.27745
	Dohh	-0.386115	1.67341
	Dok1	0.229041	0.458769
	Dok2	-0.300114	0.888593
	Dolpp1	-0.641432	1.72643
	Donson	-0.206749	0.88417
	Dop1a	-0.669672	0.3348
	Dop1b	-0.38389	0.86192
	Dpagt1	-0.518087	1.40381
	Dpcd	-0.436954	2.01122
	Dpf2	0.0589513	0.0934657
	Dph1	-0.339733	1.75177
	Dph2	-0.216246	1.0645
	Dph5	-0.341782	1.45145
	Dph6	-0.552742	1.7106
	Dph7	-0.083336	0.365983
	Dpm1	-0.194075	1.35253
	Dpm3	0.0347292	0.0633831
	Dpp3	-0.288856	1.50008
	Dpp4	-0.0358875	0.121666
	Dpp7	0.357203	0.65237
	Dpp8	-0.497524	1.83748
	Dpp9	-0.248502	0.99433
	Dpy19l1	-0.22646	1.07546
	Dpy30	-1.13872	1.46403
	Dpysl2	-0.0632175	0.366829
	Dr1	-0.155288	0.620325
	Drap1	-0.357376	1.33903
	Drg1	-0.281503	1.81633
	Drg2	-0.299173	1.36981
	Drosha	-0.0891933	0.431087
	DSCC1	-0.111965	0.486496
	Dsg1a;Dsg1b	-0.741219	0.800824
	Dsn1	-0.202577	0.579571
	Dsp	-1.62432	1.33113
	Dst	-0.566668	1.88598
	Dstn	-0.392018	1.71462
	Dtd1	-0.211849	1.37535
	Dtd2	-0.537744	1.57682
	Dtl	0.0593401	0.21041
	Dtnb	0.0828824	0.0945776
	Dtx3l	-0.319035	1.7153
	Dtymk	-0.149778	0.923037
	Dus1l	0.452196	1.86237
	Dus2	-0.423159	1.16178
	Dus3l	-0.164359	0.967089
	Dusp11	-0.229773	1.57192
	Dusp12	-0.41214	2.17355
	Dusp3	-0.649547	1.56904
	Dusp5	-0.783224	2.00358
	Dusp6	-0.351722	0.841606
	Dut	-0.148153	0.829386
	Dvl2	-0.223067	1.47652
	Dxo	-0.41967	1.18803
	Dym	-0.396923	0.881373
	Dync1h1	-0.28074	1.56446
	Dync1i2	-0.175146	0.883915
	Dync1li1	-0.450352	2.2031
	Dync1li2	-0.311758	2.04911
	Dynll1	-0.494706	1.81396
	Dynll2	-0.161335	0.729474
	Dynlrb1	-0.276522	1.62517
	Dynlt1	-0.38133	1.34481
	Dyrk1a	0.299014	1.33055
	E2f3	-0.148283	0.730589
	E2f4	-0.291418	1.46837
	E2f8	0.0364172	0.0803014
	Eaf1	-0.204061	1.01038
	Ears2	-1.13307	1.38005
	Ebag9	-0.51207	0.663348
	Ebna1bp2	-0.253057	1.43706
	Ebp	-0.0813274	0.306507
	Ecd	-0.362263	1.93432
	Ech1	-0.413684	2.04184
	Echdc1	-0.261623	1.22276
	Echs1	-0.134545	0.717255
	Eci1	-0.281376	1.48392
	Eci2	-0.441997	1.77115
	Ecpas	-0.301765	1.90547
	Ecsit	0.0824257	0.296055
	Ect2	-0.273649	0.968345
	Edaradd	0.0308436	0.10859
	Edc3	-0.254667	1.23928
	Edc4	-0.281429	1.66564
	Edem1	-0.0751023	0.102742
	Edem2	-0.429386	1.8352
	Edem3	-0.361125	0.88256
	Edf1	-0.151838	0.859643
	Edrf1	-0.784515	2.1758
	Eea1	-0.304742	0.385045
	Eed	-0.109744	0.661916
	Eef1a1	-0.43129	1.72848
	Eef1akmt1	-0.43237	2.17751
	Eef1akmt2	-0.215568	1.11329
	Eef1akmt4-Ece2;Eef1akmt4-Ece2;Eef1akmt4	-0.389212	2.15619
	EEF1AKNMT	-0.410059	1.29019
	Eef1b	-0.316359	1.58129
	Eef1d	-0.319994	1.8255
	Eef1e1	-0.39604	2.26005
	Eef1g	-0.391003	2.08752
	Eef2	-0.364635	2.0345
	Eef2kmt	-0.913098	1.38845
	Eefsec	-0.0810943	0.415095
	Efhd2	-0.183101	1.37418
	Efl1	-0.541042	2.37529
	Efr3a	-0.176233	0.68904
	Eftud2	-0.137453	0.753041
	Egln1	-0.18313	0.696249
	Egr1	-0.520917	0.750925
	Egr3	-1.66173	1.5741
	Ehbp1l1	-1.22695	1.56996
	Ehd1	-0.356418	1.37762
	Ehd3	-0.430439	1.88981
	Ehd4	-0.442344	2.18649
	Ehhadh	-0.43639	1.78731
	Ehmt1	-0.426698	1.24492
	Ehmt2	0.00380086	0.0124246
	Ei24	-0.275229	1.88903
	Eif1	-0.450305	2.43162
	Eif1a	-0.247863	1.28007
	Eif1ad	-0.293139	1.37114
	Eif1ax	-0.380142	2.14259
	Eif1b	-0.645444	1.26934
	Eif2a	0.0827583	0.0823768
	Eif2ak2	-0.357306	1.53233
	Eif2ak3	-0.811885	1.83592
	Eif2ak4	-0.905019	0.451715
	Eif2b1	-0.374969	1.54276
	Eif2b2	-0.176253	0.873029
	Eif2b3	-0.356699	2.11862
	Eif2b4	-0.255505	1.29525
	Eif2b5	-0.344703	1.95962
	Eif2d	-0.259167	1.45564
	Eif2s1	-0.253912	1.52765
	Eif2s2	-0.26176	1.34111
	Eif2s3x	-0.194339	0.907356
	Eif2s3y	-0.228617	1.1514
	Eif3a	-0.300177	2.01017
	Eif3b	-0.226152	1.34468
	Eif3c	-0.319789	1.79965
	Eif3d	-0.221055	1.23218
	Eif3e	-0.278973	1.68626
	Eif3f	-0.324955	1.96023
	Eif3g	-0.199103	1.0811
	Eif3h	-0.331745	2.05481
	Eif3i	-0.265897	1.685
	Eif3j1	-0.186257	1.27383
	Eif3k	-0.281266	1.24357
	Eif3l	-0.276569	1.81117
	Eif3m	-0.418767	1.93611
	Eif4a1	-0.365057	1.85331
	Eif4a2	-0.525628	0.968178
	Eif4a3	-0.163406	1.20589
	Eif4b	-0.0714763	0.283958
	Eif4e	-0.286728	1.76323
	Eif4e2	-0.752776	1.58644
	Eif4e3	0.00527543	0.0101478
	Eif4ebp2	0.167701	0.0619409
	Eif4enif1	-0.125735	0.699846
	Eif4g1	-0.24	1.48427
	Eif4g2	-0.350708	1.63524
	Eif4g3	-0.255912	1.34833
	Eif4h	0.0143329	0.0450895
	Eif5	-0.924996	1.26068
	Eif5a	-0.36737	1.56864
	Eif5b	-0.621552	1.35116
	Eif6	-0.407355	1.7951
	Eipr1	-0.274198	0.910092
	Elac2	-0.305418	1.82594
	Elavl1	-0.102448	0.510915
	Elf1	0.00308305	0.0117588
	Elf2	0.0242963	0.095803
	Elf4	-0.101667	0.508784
	Ell	-0.232281	1.1316
	Elmo1	-0.264838	1.68174
	Elmo2	-0.42337	1.6389
	Eloa	-0.110278	0.51505
	Elob	-0.229521	1.15742
	Eloc	-0.26559	1.40571
	Elovl1	-0.170985	0.339454
	Elovl5	-0.277391	1.42032
	Elp1	-0.306052	2.03168
	Elp2	-0.276216	1.55261
	Elp3	-0.286769	1.292
	Elp4	-0.178222	0.990227
	Elp5	-0.344043	1.73968
	Elp6	-0.476612	3.11504
	Emb	-0.118973	0.58124
	Emc1	-0.378758	1.59875
	Emc10	-0.338211	2.0831
	Emc2	-0.352093	1.51561
	Emc3	-0.127904	0.385439
	Emc4	-0.223922	1.54133
	Emc6	-0.0832224	0.208437
	Emc7	0.0215428	0.0582124
	Emc8	-0.255654	1.5642
	Emd	-0.0178312	0.0494988
	Eme1	-0.0476368	0.0853193
	Emg1	-0.252721	1.47465
	Emilin2	-0.313979	0.502152
	Eml2	-0.241405	1.3189
	Eml3	-0.130378	0.937465
	Eml4	-0.105648	0.669571
	Emsy	-0.284147	1.04555
	Enah	0.181273	0.594946
	Endod1	-0.629244	2.1176
	Endog	-0.255258	1.59404
	Engase	-0.345405	1.16586
	Eno1	-0.376277	1.7216
	Eno2	-0.41154	2.40078
	Eno3	-0.515256	1.59998
	Enoph1	-0.216131	1.13838
	Enpp4	-0.573595	2.80132
	Ensa	0.0222762	0.0482341
	Entpd1	-0.36462	1.7555
	Entpd5	0.954978	0.777353
	Entpd6	0.0515495	0.166106
	Eny2	-0.494553	1.68532
	Eomes	-0.723124	1.13144
	Ep300	-0.105705	0.447609
	Ep400	-0.13684	0.343988
	Epb41	-0.198193	1.02114
	Epb41l2	-0.0677619	0.39881
	Epb41l3	-0.432151	1.28464
	Epc1	-0.282445	1.2499
	Epc2	-0.606125	0.882752
	Epg5	-0.567286	1.47908
	Ephx1	0.277462	0.170071
	Epm2aip1	-0.00421318	0.0123388
	Epn1	0.00387182	0.013105
	Eprs1	-0.311726	1.71795
	Eps15	-0.288487	1.98249
	Eps15l1	-0.270619	1.70721
	Eps8	-0.291833	0.83255
	Epsti1	-0.0502994	0.20153
	Eral1	-0.336007	1.44968
	Erap1	-0.240848	1.63351
	Erbin	-0.154846	0.385992
	Erc1	-0.362178	1.26806
	Ercc1	-0.397502	1.02705
	Ercc2	-0.599169	2.81407
	Ercc3	-0.419017	1.73364
	Ercc4	-0.484923	1.66313
	Ercc6l	1.06052	0.505445
	Erg28	-0.106911	0.275997
	Ergic1	-0.202301	1.36371
	Ergic2	-0.336202	1.27579
	Ergic3	-0.151512	0.652132
	Erh	-0.363373	1.54831
	Eri1	-0.100987	0.400314
	Eri3	0.204611	0.648632
	Erich1	0.208154	0.22646
	Erlec1	-0.0977939	0.272282
	Erlin1	0.501472	2.93385
	Erlin2	-0.279344	1.65798
	Ermp1	-0.556149	1.88367
	Ero1a	-0.776967	1.74931
	Ero1b	-0.479509	1.44631
	Erp29	-0.229082	1.37512
	Erp44	-0.169728	0.814419
	Esco2	-0.36626	1.93303
	Esd	-0.341918	1.61625
	Esf1	-0.303444	1.9563
	Espl1	-0.500629	1.23097
	Esrra	-0.211094	0.23958
	Ess2	-0.143728	0.814582
	Esyt1	-0.20007	1.39758
	Esyt2	-0.831938	3.54176
	Etf1	-0.301359	1.79147
	Etfa	-0.288467	1.4884
	Etfb	-0.173239	1.10584
	Etfdh	-0.165754	0.80764
	Ethe1	-0.150788	0.757859
	Etnk1	-0.40173	2.08293
	Ets1	-0.0525856	0.14954
	Etv3	-0.165888	0.80863
	Etv6	-0.342093	0.644343
	Eurl	-0.205344	1.20207
	Evi2b	-0.296234	1.2705
	Evl	-0.273486	1.35686
	Ewsr1	-0.108614	0.672185
	Exoc1	0.193177	0.235576
	Exoc2	-0.150347	0.551378
	Exoc3	-0.25152	0.843874
	Exoc4	-0.323135	1.16075
	Exoc5	-0.472053	2.11843
	Exoc6	-0.275525	1.5039
	Exoc7	-0.286545	1.44083
	Exoc8	0.1228	0.306144
	Exog	-0.433637	0.538391
	Exosc1	-0.140193	0.867147
	Exosc10	-0.190591	1.39952
	Exosc2	-0.142579	0.833181
	Exosc3	-0.264732	1.74911
	Exosc4	-0.327175	1.51393
	Exosc5	-0.103164	0.579286
	Exosc6	-0.026076	0.0988847
	Exosc7	-0.217406	1.38616
	Exosc8	-0.0284101	0.112926
	Exosc9	-0.362048	1.09268
	Ext2	-0.605178	1.19631
	Eya3	-0.169304	0.828331
	Ezh1	-0.985962	1.62739
	Ezh2	-0.122298	0.737775
	Ezr	-0.256986	1.62464
	F13a1	-0.492972	1.67825
	F2	-0.247146	1.24375
	F2r	-0.204382	0.70971
	F5	-0.6439	0.853444
	F8a1	-0.0771678	0.254913
	Faah	-0.00144179	0.00276065
	Faap100	-0.287054	1.52467
	Fabp5	0.0303319	0.108744
	Fadd	-0.0698345	0.36774
	Fads1	-0.313177	1.54819
	Fads2	-0.430727	0.775254
	Faf1	-0.260166	1.83614
	Faf2	-0.38782	1.10365
	Fah	-1.38686	1.45275
	Fahd2a	-0.0642576	0.283905
	Faim	-0.448824	2.42143
	Fam102a	-0.210786	1.01193
	Fam107b	-0.248647	1.52676
	Fam111a	-0.278761	1.63585
	Fam114a1	-0.550002	1.85
	Fam114a2	-0.456471	1.14363
	Fam118a	-0.431577	1.88906
	Fam118b	0.131287	0.515365
	FAM120A	-0.191898	1.08485
	Fam126a	-0.142683	0.65006
	Fam133b	0.11968	0.611941
	Fam136a	-0.330438	1.48726
	Fam160b1	-0.763403	1.34438
	Fam162a	-0.161352	1.02451
	Fam169b	-0.072275	0.378083
	Fam172a	-0.504244	1.08997
	Fam177a1	-0.509428	2.08964
	Fam185a	-0.119064	0.112645
	Fam207a	-0.155856	0.707133
	Fam20a	-0.720555	2.30611
	Fam20b	-0.372443	1.23987
	Fam210a	-0.440741	1.92221
	Fam234b	-0.54798	1.55999
	Fam32a	0.12452	0.246929
	Fam3a	-0.278808	0.147761
	Fam3c	-0.194311	1.14627
	Fam50a	-0.0720127	0.361688
	Fam76a	-0.128478	0.679349
	Fam76b	-0.0941833	0.662618
	Fam91a1	0.306088	0.220047
	Fam98a	-0.3366	1.90797
	Fam98b	-0.192704	1.35499
	Fam98c	-0.142003	0.486956
	Fanca	-0.344395	0.595051
	Fancd2	-0.172302	0.854502
	Fanci	-0.101204	0.426922
	Far1	-0.269964	1.06309
	Farp1	-0.686196	1.79742
	Fars2	-0.216472	0.309764
	Farsa	-0.405792	1.41766
	Farsb	-0.315998	1.89175
	Fasn	-0.302001	0.723585
	Fastkd2	-0.139209	0.635824
	Fastkd5	-0.316232	0.452134
	Fau	-0.139093	0.646235
	Fbl	-0.287129	1.48968
	Fbln1	-0.150991	0.520394
	Fbxl18	0.0197806	0.0334416
	Fbxl20	-0.313554	0.386644
	Fbxl6	-0.342418	0.395603
	Fbxl8	-0.104894	0.439901
	Fbxo22	-0.194503	1.22035
	Fbxo28	-0.240986	1.29269
	Fbxo3	-0.237689	1.12194
	Fbxo30	-0.499998	1.83617
	Fbxo33	-0.398371	0.769904
	Fbxo38	-1.24965	2.04203
	Fbxo42	-0.349773	1.86378
	Fbxo5	-0.187387	0.951366
	Fbxo6	-0.828876	2.13765
	Fbxo7	0.305152	0.475046
	Fbxo9	0.360924	0.281622
	Fbxw11	-0.362355	2.20845
	Fcer1g	-1.25342	1.99167
	Fcf1	-0.249627	1.12131
	Fcho1	-0.344996	2.18141
	Fdft1	-0.675746	2.46802
	Fdps	-0.603549	2.41164
	Fdx1	-0.367755	1.04557
	Fdx2	-0.440077	1.59428
	Fdxr	-0.515	0.562525
	Fem1b	-0.542962	1.56443
	Fen1	-0.102959	0.583111
	Fermt3	-0.0957033	0.410636
	Fgb	-0.285436	0.680066
	Fgd3	-0.260546	0.867723
	Fgfr1op2	-0.265741	1.60069
	Fgg	-0.211991	0.501587
	Fgl2	-0.492108	1.57349
	Fgr	-0.462449	2.06395
	Fh	-0.197786	1.13196
	Fhl1	-0.0258986	0.0237531
	Fhl2	-0.487454	1.653
	Fhl3	-0.209587	0.498702
	Fhod1	-0.194033	1.32154
	Fibp	0.152206	0.13351
	Fig4	-0.427927	2.35923
	Filip1l	-0.374419	2.33544
	Fip1l1	-0.194616	0.763706
	Fis1	-0.47443	0.663775
	Fiz1	0.446207	1.67869
	Fkbp15	-0.343474	2.13407
	Fkbp1a	-0.35374	1.3636
	Fkbp2	-0.14062	0.645653
	Fkbp3	-0.171518	1.02247
	Fkbp4	-0.117279	0.775992
	Fkbp5	-0.275115	1.29808
	Fkbp8	-0.247712	1.05961
	Flad1	-0.395859	2.07714
	Fli1	-0.0752198	0.152341
	Flii	-0.350846	2.21855
	Flna	-0.316074	1.1547
	Flnb	0.209297	0.315243
	Flot1	-0.119134	0.41789
	Flot2	-0.12778	0.563735
	Fmnl1	-0.29111	1.7385
	Fmr1	-0.142461	0.857539
	Fn1	-0.106824	0.189494
	Fn3krp	-0.48297	1.95673
	Fnbp1	-0.145289	0.857224
	Fnbp4	-0.0733947	0.409952
	Fndc3a	-0.878708	2.63981
	Fnta	-0.395756	1.23126
	Fntb	-0.308406	1.33357
	Focad	-0.924538	1.73798
	Fosl2	-0.781393	1.74507
	Foxj3	1.86778	0.722117
	Foxk1	-0.158662	0.851548
	Foxk2	-0.0374038	0.104652
	Foxo1	-0.182407	0.383483
	Foxp1	-0.0565099	0.174861
	Fpgs	-0.0566719	0.0544165
	Fra10ac1	-0.193045	0.883937
	Frg1	0.00608098	0.0235025
	Frmd8	-0.317302	0.658692
	Fryl	-0.615583	2.33725
	Fsd1l	1.73304	0.641824
	Fth1	-0.73115	2.24732
	Ftl1	-0.568939	2.10371
	Fto	-0.225983	1.54008
	Ftsj1	-0.286076	1.33671
	Ftsj3	-0.235869	1.49101
	Fubp1	-0.111197	0.609755
	Fubp3	-0.173946	0.177387
	Fuca1	0.0354634	0.119971
	Fuca2	0.158443	0.200088
	Fundc2	0.00938443	0.0353187
	Furin	-1.72824	3.33099
	Fus	-0.130654	0.724358
	Fut8	0.104862	0.742074
	Fxn	-0.408264	1.92571
	Fxr1	-0.304312	1.64414
	Fxr2	-0.196562	0.942224
	Fxyd5	0.176085	1.21181
	Fyb1	-0.365648	1.38876
	Fyco1	-0.69098	0.711357
	Fyn	-0.224567	1.77662
	Fyttd1	0.00921698	0.0259764
	G3bp1	-0.247324	1.53608
	G3bp2	-0.297518	1.71899
	G6pc3	-0.190315	0.237287
	G6pdx	-0.287859	1.65351
	Gaa	-0.938348	0.71908
	Gabarap	-0.27122	1.43674
	Gabarapl2	-0.240358	0.970678
	Gabpa	-0.230757	1.4102
	Gabpb1	0.129801	0.423764
	Gabpb2	-0.052279	0.202503
	Gadd45gip1	0.122123	0.368497
	Gak	-0.222303	1.35559
	Gale	-0.329458	1.47897
	Galk1	-0.19175	1.22228
	Galk2	-0.275674	1.32565
	Galns	-0.256705	1.57418
	Galnt1	-0.379653	1.61256
	Galnt12	-0.187002	0.942781
	Galnt2	-0.374627	1.71196
	Galnt3	-0.797867	1.88601
	Galnt6	-0.571303	0.821937
	Galnt7	-0.227203	1.33891
	Galt	-0.328823	0.902859
	Gan	-0.363509	0.967027
	Ganab	-0.333702	1.72366
	Gapdh	-0.384397	1.57327
	Gapvd1	-0.185035	0.893076
	Gar1	-0.134276	0.817626
	Gars1	-0.342917	1.72096
	Gart	-0.232526	1.49572
	Gata3	-0.097467	0.441809
	Gatad1	-0.0234898	0.116113
	Gatad2a	-0.0822979	0.327101
	Gatad2b	0.0597193	0.197656
	Gatd1	-0.197121	0.98862
	Gatd3a	-0.0430015	0.240475
	Gatm	-0.376786	0.394978
	Gba	-0.286249	1.24432
	Gba2	-0.279544	1.48165
	Gbe1	0.105433	0.271589
	Gbf1	-0.358391	1.87679
	Gbp2	-0.0534301	0.234952
	Gbp4	-0.188309	0.945331
	Gbp5	-0.0884203	0.268522
	Gbp6	-0.252434	0.8987
	Gbp7	-0.243454	1.33149
	Gcat	-0.226546	0.990417
	Gcc1	0.111939	0.100622
	Gcc2	0.232094	0.62127
	Gcdh	-0.207106	0.615297
	Gcfc2	-0.202835	0.993193
	Gclc	-0.0827521	0.376156
	Gclm	-0.0810359	0.293349
	Gcn1	-0.370296	1.89937
	Gcsh	-0.585526	1.71617
	Gde1	-0.275631	1.58933
	Gdi1	-0.126795	0.729927
	Gdi2	-0.266662	1.82139
	Gdpgp1	-0.89141	1.99877
	Gem	-0.919073	2.40979
	Gemin2	0.472694	0.390887
	Gemin4	-0.350216	1.76205
	Gemin5	-0.36021	1.98782
	Gemin6	-0.84383	1.66004
	Gemin7	0.261802	0.285028
	Gen1	-0.389004	1.65893
	Get1	1.78327	0.310128
	Get3	-0.286006	1.79205
	Get4	-0.274265	1.38446
	Gfap	0.407953	0.359271
	Gfer	-0.253786	1.29104
	Gfm1	0.317025	0.459713
	Gfm2	-0.363858	1.36458
	Gfpt1	-0.543854	2.04469
	Gga1	-0.418277	1.69352
	Gga3	-0.492061	1.3783
	Ggact	-0.418429	1.66841
	Ggct	-0.156066	0.83944
	Ggh	-0.162111	0.772893
	Ggnbp2	-0.064697	0.150472
	Ggps1	-0.340065	1.87936
	Ggt1	7.51e-05	0.000111198
	Ggta1	-0.239802	0.596334
	Ghitm	0.0318018	0.09716
	Gid8	-0.563693	0.900316
	Gigyf1	-0.281586	0.514425
	Gigyf2	-0.166126	0.866335
	Gimap1	-0.304214	1.75482
	Gimap3	-0.0065363	0.0165695
	Gimap4	0.126411	0.757655
	Gimap5	-0.0298581	0.125392
	Gimap6	-0.0987293	0.404982
	Gimap7	-0.0534463	0.242318
	Gimap8	-0.230059	1.49202
	Gimap9	0.0164375	0.0684084
	Gins1	-0.0378259	0.112065
	Gins2	-0.318852	0.613041
	Gins3	0.898877	3.63915
	Gins4	-0.125896	0.586529
	Gipc1	-0.323892	1.41921
	Gipc2	-0.731516	1.61496
	Git1	-0.184851	1.36945
	Git2	-0.211759	1.43767
	Gk	-0.198344	0.90934
	Gla	-0.228796	1.05844
	Glb1	-0.331311	1.52518
	Gle1	-0.436538	2.10368
	Glg1	-0.362174	2.16138
	Glipr1	-0.383469	1.9804
	Glipr2	-0.154797	0.821005
	Glmn	-0.270717	1.46788
	Glmp	-0.501241	2.01978
	Glo1	0.690097	2.87367
	Glod4	-0.199172	1.07216
	Glrx	-0.529187	1.51893
	Glrx2	-0.323618	1.6274
	Glrx3	-0.202829	1.26151
	Glrx5	-0.317883	1.55047
	Gls	-0.162509	0.944432
	Gls	-0.0475312	0.226398
	Gltp	-0.231521	1.52881
	Glud1	-0.0609593	0.382889
	Glul	-0.0880984	0.404684
	Glyr1	-0.199197	0.516171
	Gm2a	0.21312	1.16156
	Gmds	-0.419883	1.58095
	Gmeb1	-0.00494617	0.00696095
	Gmeb2	0.119946	0.192599
	Gmfb	-0.186986	0.994377
[truncated: 4,977 more rows]

## Sheet: 4F
	Estimated protein copies per cell
	Gene name	WT			Pim dKO
	Gzmb	25138756	25790308	22839065	9810257	16736488	17457684
	Gzma	12442553	14144808	11445779	4761922	8862118	9469891
	Prf1	158733	165713	148426	22720	72534	71867
	Gzmc	189837	218897	166843	31531	80126	91727
	Gzme	158158	188262	154171	8615	50999	59637
	Gzmd	34414	43410	25509	6396	14049	15259
	Gzmk	2351	757	1238	982	1290	1544
	Gzmf	2114	1496	1499	533	678	488
	Gzmg	1253	2156	1111	0	0	254
	Ifng	13715	14669	11438	2058	7262	7372
	Tnf	21938	24123	23660	9620	19307	17878

## Sheet: 4G
	Estimated protein copies per cell
	Gene name	WT			Pim dKO
	Gzmb	25138756	25790308	22839065	9810257	16736488	17457684
	Gzma	12442553	14144808	11445779	4761922	8862118	9469891

## Sheet: 4H
	Estimated protein copies per cell
	Gene name	WT			Pim dKO
	Ifng	13715	14669	11438	2058	7262	7372
