# Supplementary material for: PIM kinase control of CD8 T cell protein synthesis and cell trafficking
Source: eLife. 2025 May 13;13:RP98622. doi: 10.7554/eLife.98622 (PMC12074636; doi:10.7554/eLife.98622)
Supplement: Figure 5—source data 1. [file elife-98622-fig5-data1.xlsx]

## Sheet: 5A
	Gene names	IL2_dKO_v_WT_log2FC_all_mRNA	IL2_dKO_v_WT_-log10.p.val_all_mRNA	IL2_dKO_v_WT_-log10.p.val_DE_proteins (FC>1.5, q<0.05)
	Gnai3	0.0288161	0.350711
	Cdc45	-0.0212935	0.174179
	Narf	-0.0533927	0.214071
	Cav2	-0.211597	0.476351
	Klf6	0.152583	2.03379
	Scmh1	-0.0879753	0.514983
	Cox5a	0.0735354	0.754835
	Xpo6	0.017157	0.204549
	Tfe3	-0.0547429	0.334589
	Axin2	0.319863	1.27619
	Brat1	-0.130666	0.978334
	Gna12	-0.0890051	0.605697
	Igsf5	-0.339874	1.0922
	Pih1d2	0.0898814	0.125478
	Dlat	-0.162375	2.091
	Sdhd	0.0843173	0.730263
	Ccnd2	0.0133814	0.120184
	Gpr107	-0.152722	1.57525
	Drp2	-0.617408	1.80395
	Tspan32	0.738437	2.08478
	Lhx2	1.03452	2.16926
	Mid2	-0.699602	0.89539
	Trim25	-0.0611916	0.680563
	Dgke	0.0429605	0.292644
	Scpep1	0.203651	3.35427
	Mnt	0.0595806	0.42285
	Itgb2	-0.137017	2.11239
	Hddc2	0.0583532	0.337366
	Pemt	-0.143646	0.590878
	Cdh1	-0.238563	1.3566
	Ckmt1	-0.190039	0.224579
	NA	0.373699	0.617655
	Comt	-0.0733798	0.694639
	Rtca	0.016823	0.123935
	Dbt	-0.234791	3.05237
	Dazap2	0.081394	1.30061
	Mcts1	0.022338	0.161908
	Rnf17	-0.577871	0.868376
	Trappc10	0.0146815	0.12965
	Ccm2	0.0127284	0.100679
	Tbrg4	-0.0602984	0.658324
	Mx1	-0.422899	3.17582
	Ndufa9	0.0506705	0.505966
	Lck	0.078982	1.33441
	Galnt1	-0.0479862	0.524703
	Mkrn2	0.0522662	0.434519
	Pparg	-0.836532	3.59183
	Raf1	0.0302601	0.307274
	Septin1	0.0725089	0.939117
	Pdgfb	-0.0200618	0.0114285
	Acvrl1	-1.02899	3.21701
	Tamalin	-0.105883	0.410896
	Acvr1b	-0.157806	1.52626
	Tom1l2	-0.0559777	0.227828
	Zfp385a	0.0449799	0.0873669
	Itga5	0.154337	0.538983
	Wdr77	-0.0656868	0.567491
	Adora3	-0.628416	3.0008
	Atp5pb	0.059923	0.531711
	Hnrnpd	0.0863138	1.34521
	Dynlt1c	-0.109632	0.197215
	C1d	0.103013	1.1372
	Gm2a	0.375641	4.59973
	Krit1	-0.111226	1.05327
	Clcn4	-0.0355841	0.341494
	Sema4f	0.495095	2.8389
	Hk2	-0.241789	1.87133
	Myo18a	-0.115581	1.48174
	Haao	-0.243108	3.07581
	Cd52	0.0636302	0.771091
	Abhd15	0.0386021	0.111998
	Kat2b	-0.0072224	0.0357246
	Rab5b	-0.13441	1.21287
	Icosl	-0.127069	1.14589
	Spg7	-0.0920604	1.02761
	Rpl13	0.0714807	0.631982
	Chmp1a	-0.0118186	0.100218
	Rpa1	0.169973	3.21538
	Serpinf1	0.0158967	0.0197393
	Tubgcp3	0.032661	0.37465
	Polr3d	-0.12878	1.13318
	Tcf7	1.55102	3.88698
	Ddx3x	0.0133772	0.117966
	Il12rb1	-0.206408	1.65785
	Usp32	0.00159182	0.00992714
	Txnrd3	-0.0364315	0.182282
	Fasl	0.0345636	0.207133
	Zfp512b	-0.169218	1.48388
	Dnajc5	-0.0588175	0.844498
	Tpd52l2	0.0933365	1.00991
	Fmr1	0.0796218	0.955396
	Pxmp4	0.0888881	0.498415
	Dlg3	0.251665	0.746276
	Gnb1l	0.0451372	0.163173
	Mmp11	0.100347	0.1202
	Smarcb1	-0.0179568	0.18416
	Hip1r	-0.0857314	0.969285
	Nsun5	-0.132104	1.19261
	Top1mt	-0.157491	1.21598
	Slc7a7	-0.142236	0.117861
	Oxa1l	-0.0373692	0.300747
	Heatr6	-0.0581239	0.391513
	Ccl3	0.215527	0.392368
	Ilf2	0.0551403	0.618473
	Chtop	0.11983	2.44174
	Snapin	-0.0135855	0.0854231
	S100a4	0.0587619	0.117614
	S100a5	0.178596	0.261101
	S100a6	-0.0017295	0.00713775
	Icam2	0.330828	2.4777
	Mapk7	-0.0265698	0.139862
	Epn2	0.0504308	0.0636307
	B9d1	-0.157348	0.158094
	Sec24b	0.120018	0.909467
	N4bp3	-0.0605399	0.350185
	Rmnd5b	-0.229919	2.95734
	Nhp2	0.042977	0.228749
	Vps9d1	-0.0358289	0.135821
	Zfp276	-0.246151	2.25559
	Mfsd10	0.0431267	0.358166
	Luzp1	0.0258456	0.151096
	Kctd10	0.0538651	0.619506
	Poldip2	0.0422025	0.432287
	Ift20	-0.0035994	0.0169838
	Col6a1	-0.308349	0.434035
	Pcbp3	0.276999	0.759533
	Lgals9	0.279675	3.89444
	Araf	-0.164102	2.59935
	Cfp	-0.896456	5.82232
	Uxt	0.0729927	0.500297
	Cnnm3	0.0404193	0.170345
	Lman2l	-0.225255	1.25572
	Mcm3ap	-0.0484813	0.514527
	Pcnt	0.0357083	0.256726
	Mxd1	-0.166314	0.911871
	Gmcl1	-0.0317919	0.254875
	Snrnp27	-0.0333451	0.186602
	Oas1c	-0.121468	0.511332
	Ocrl	-0.16972	1.55538
	Calm1	0.0629427	0.537374
	Agpat3	-0.0487657	0.655947
	Sema6b	-0.136634	0.302695
	Uhrf1	0.100982	1.12934
	Dpp9	-0.0581763	0.646125
	Lsr	1.78791	3.55647
	Gramd1a	-0.247726	2.52885
	Ckb	0.223349	0.833732
	Sp1	0.0407705	0.539859
	Itgb7	0.264657	3.53668
	Myg1	0.0545303	0.506133
	Rarg	-0.0686999	0.161275
	Pfdn5	0.10074	0.696273
	Efnb2	-0.643512	2.0996
	Rrp15	-0.0506542	0.354798
	Rnd2	-0.314087	0.548461
	Srr	0.252095	1.56153
	Acp5	-0.0987266	0.719505
	Fbxo9	-0.205119	2.6295
	Vps50	-0.147151	1.13394
	Hars	-0.0677459	0.77488
	Zmat2	0.0670277	0.781785
	Ube2c	0.0908779	0.875425
	Smg5	-0.05941	0.883299
	Cct3	0.0735687	0.710016
	Glmp	-0.0629615	0.545233
	Mef2d	0.0349713	0.268933
	Tmem79	0.102923	0.255147
	Snd1	-0.0613839	0.706194
	Col18a1	-1.11172	1.83407
	Slc19a1	0.0147102	0.105275
	Kpnb1	0.0408577	0.505268
	Npepps	-0.010851	0.08592
	Tbx21	0.372213	3.23688
	Mrpl10	-0.0323509	0.233533
	Cyp51	0.00012226	0.00051568
	Tcf25	-0.0400453	0.485554
	Tubb6	-0.362275	1.8778
	Def8	-0.0313665	0.259471
	Itga3	-0.887504	4.25781
	Foxm1	0.164714	1.43335
	Itfg2	0.0317161	0.185179
	Tulp3	0.0441673	0.147256
	Gtf2h4	0.0390949	0.289877
	Tubb5	0.123563	1.93019
	Ell2	-0.1507	1.38801
	Jup	-0.94987	3.85411
	Klhl10	-0.496729	0.566881
	Nom1	0.0203235	0.183918
	Ergic1	-0.0501603	0.646061
	Acap1	-0.176764	2.54566
	Ifrd1	0.0634277	0.480075
	Stk38l	0.0423473	0.151123
	Brpf1	-0.0473306	0.58475
	Akr1b3	0.0506482	0.470686
	Gstt1	-0.622458	0.903471
	Gstt3	0.200951	0.325582
	Ddt	-0.0697702	0.225611
	Ddx18	0.0287337	0.249513
	Ubl3	0.0186063	0.143078
	Gramd3	-0.0824346	0.687643
	Eef1e1	0.0249089	0.157762
	Akt1	-0.0115606	0.098144
	Il16	-0.0013078	0.00803532
	Tcirg1	-0.172617	1.19129
	Naglu	0.0138436	0.0514076
	Coasy	-0.0783194	0.783289
	Smo	0.0455315	0.082104
	Crnkl1	0.140996	2.57174
	Chordc1	0.0631283	0.933547
	Rtcb	0.0363427	0.406027
	Pwp1	0.0263786	0.234061
	Fbxo7	0.109318	0.79415
	Capns1	-0.0101515	0.0875876
	Clpb	0.0547475	0.454703
	Septin7	0.104678	1.56246
	Zdhhc4	-0.0211705	0.169575
	Rac1	0.0826998	1.39822
	Nup214	-0.0447295	0.507822
	Aif1l	0.32798	0.861465
	Cpa3	-0.877409	0.869145
	Ugp2	-0.0470743	0.42801
	Trmt1	-0.0738148	0.68671
	Nacc1	-0.0157344	0.165268
	Nfix	0.647644	1.7264
	Slc1a5	-0.238279	4.33759
	Uba1	-0.0671985	0.798946
	Siae	0.0908595	0.439766
	Fam50a	-0.0415714	0.32592
	Emd	0.102657	1.44867
	Taco1	0.0675484	0.377786
	Sipa1l2	-0.378684	3.21508
	Ap4e1	-0.0673544	0.705464
	Blvra	0.035661	0.227927
	Idh3g	0.106608	1.62892
	Ssr4	0.0104894	0.0594741
	Bcap31	0.0708466	0.753499
	Fam98a	-0.0583074	0.57127
	Kmt2a	-0.103554	0.826313
	Ift46	0.0687721	0.488066
	Tmem25	0.0985146	0.134747
	Cd3g	0.130946	1.79471
	Trappc6a	0.108872	0.610101
	Supt6	-0.0882934	1.60977
	Spag5	-0.0150891	0.105696
	Unc119	-0.216177	2.14813
	Sdf2	-0.0488125	0.357136
	Ccne1	0.0570985	0.463394
	Hsf2bp	-0.732254	1.33231
	Bbc3	0.453728	1.54439
	Psmc3	0.00381904	0.0262978
	Acp2	-0.0118794	0.0485324
	Rapsn	0.138382	0.278036
	Slc39a13	-0.2949	1.45146
	Celf2	0.0168384	0.158242
	Nr1h3	0.243709	0.206045
	Ddb2	0.0262224	0.0966935
	Sf3a1	0.0237072	0.256475
	Stat6	-0.0910576	0.915689
	Napsa	-0.0845437	0.47318
	Vrk3	0.0907349	0.857151
	Smg9	-0.0623004	0.546275
	Paxip1	0.0198756	0.176926
	Rmnd5a	0.211258	2.57559
	Mov10	0.0327212	0.201992
	Ppm1j	-0.140583	1.48425
	Rhoc	-0.246061	1.58469
	Ppard	-0.325337	3.35178
	Def6	-0.0657936	0.475721
	Metrn	0.199276	1.15518
	Lmf1	-0.175598	1.2164
	Ciao3	-0.0896658	0.625596
	Angptl4	0.0854626	0.622047
	Dbf4	0.0384079	0.391806
	Daxx	-0.0381115	0.372779
	Cd320	-0.107144	0.413089
	Ipo4	-0.253085	2.87842
	Tm9sf1	-0.0390159	0.421431
	Irf9	-0.117329	1.24509
	Gmpr2	0.0047198	0.0311634
	Mdp1	-0.0028241	0.019257
	Dhrs1	0.102654	1.02278
	Tmem161a	-0.0829248	0.754928
	Armc6	-0.0089848	0.0412768
	Borcs8	0.0922318	0.684868
	Slc25a42	-0.234365	0.825345
	Snx9	-0.0332384	0.221924
	Ranbp3	-0.0463616	0.453507
	Ndufa11	-0.0046302	0.0211864
	Nr2f6	0.086114	0.345711
	Use1	0.0908397	0.73587
	Ocel1	-0.17634	1.08687
	Dyrk1b	0.154568	0.341921
	Braf	0.0157702	0.111396
	Ndufb2	-0.037483	0.111816
	Hltf	-0.0046696	0.032876
	Prpf6	-0.0137791	0.123991
	Rgs19	-0.0644438	0.85269
	Snrpd1	0.053529	0.358043
	Tchp	-0.0637345	0.344613
	Tiam1	-0.0363906	0.128653
	Tsc2	-0.0968361	1.16628
	Puf60	0.0669802	0.83013
	Golga2	-0.215327	3.18669
	Uck1	0.11154	1.02565
	Scin	-1.17683	3.76473
	Ikzf4	-0.0938275	0.821066
	Mien1	0.0561769	0.328195
	Axl	-0.0333641	0.19183
	Tgfb1	-0.207244	2.23836
	Ccdc97	-0.046049	0.357438
	Zfp40	-0.101429	0.461772
	Akap8l	-0.0493511	0.25483
	Pdcd2l	0.0155095	0.0641494
	Gtf2f1	-0.031471	0.31498
	Clpp	-0.0504558	0.303617
	Alkbh7	-0.0019894	0.00460163
	Dennd1c	-0.268923	2.20208
	Med6	0.0706676	0.446765
	Lcp2	-0.0333466	0.341004
	Cse1l	0.0238602	0.18942
	Naa20	0.086962	0.823605
	Prkra	-0.0505669	0.161065
	Fkbp7	0.769657	2.95611
	Plekha3	-0.0619154	0.568118
	Ykt6	-0.125589	1.64166
	Baz1b	0.0507679	0.604362
	Pex6	-0.0851927	0.488328
	Mrpl2	0.0720644	0.483971
	Mea1	-0.0134706	0.0749768
	Grin2d	-0.239962	0.292502
	Kdelr1	0.0406194	0.437225
	Tmem143	-0.0508164	0.179318
	Ggct	0.0426513	0.272409
	Jag2	0.0876575	0.230323
	Btbd6	-0.102694	0.408715
	Nudt14	0.301171	2.02133
	Epdr1	-0.626536	2.04505
	Flii	-0.010793	0.117463
	Top3a	-0.0359755	0.326685
	Atg4d	-0.0590536	0.39176
	Qtrt1	-0.115244	1.05594
	Hdgfl2	0.0044599	0.0281483
	Chaf1a	0.0615008	0.798559
	Adprh	0.103353	1.11433
	Tmem39a	-0.113898	1.07289
	Timmdc1	-0.0510456	0.316442
	Pla1a	-0.414316	0.379297
	Mcm2	0.121254	1.52163
	Tpra1	-0.0146016	0.0531589
	Nab1	-0.0200142	0.124223
	Adgre5	0.489429	3.03027
	Il17ra	0.00332814	0.0223685
	Arrdc2	-0.249165	2.10393
	Map2k7	0.0127678	0.0882221
	Timm44	0.0401989	0.450525
	Ap2a2	-0.12405	2.35114
	Pnkp	-0.0431959	0.321927
	Med25	-0.0625514	0.585284
	Clptm1	-0.0037769	0.0314548
	Relb	0.118446	0.675761
	Tomm40	-0.0039398	0.025952
	Apoe	-0.208161	0.754706
	Hbp1	0.412317	2.05521
	Prkar2b	0.193715	1.28949
	Cdkn1b	0.195478	1.08414
	Klf4	1.30386	2.78103
	Ap1m1	0.108305	1.56885
	Rab8a	0.0436068	0.459828
	Hmgn2	0.260652	3.9145
	Fam32a	0.1379	1.23329
	Stard3nl	0.0716144	0.305211
	Stk11	-0.0604703	0.566515
	Atp5d	-0.024782	0.1737
	Ppp5c	-0.0916616	1.07517
	Cdk12	-0.043538	0.533017
	Lipe	-0.156528	0.486412
	Pafah1b2	0.0316218	0.355768
	Cnot11	0.101402	1.52588
	Slc2a3	-0.171939	1.18147
	Foxj2	-0.126043	0.969488
	Sri	0.0331647	0.360799
	Dgcr2	-0.0907185	1.01647
	Irf3	-0.12896	1.45944
	Bcl2l12	-0.0720409	0.385953
	Zfp959	0.0101685	0.0421494
	Mpnd	0.153738	1.49313
	Sh3gl1	-0.0359647	0.368328
	Ebi3	-0.262966	0.844237
	Yju2	-0.0566588	0.410862
	Ranbp2	-0.0097317	0.0778415
	Grk5	-0.12478	0.549097
	Dvl3	-0.0896273	0.789641
	Abcf3	-0.0650592	0.44386
	Eif2b5	-0.0027118	0.0209425
	Cyth2	-0.0006946	0.00297244
	Sult2b1	-0.573346	2.89299
	Plag1	-0.561795	1.67432
	Mrpl4	-0.0226784	0.192342
	Keap1	0.00868416	0.0570173
	Ap1m2	-0.334645	0.585509
	Glg1	-0.0236716	0.189715
	Btbd2	0.139481	0.627406
	Csnk1g2	-0.0018302	0.0130375
	Abhd17a	0.0687174	0.410608
	Mob3a	-0.0316442	0.374016
	Cacnb3	0.609531	2.87195
	Fkbp11	-0.230679	0.477743
	Ddx23	-0.0341657	0.436496
	Pld3	-0.217549	2.74757
	Grik5	0.0197697	0.0344667
	Rabac1	0.0479574	0.225636
	Etv3	-0.0659324	0.59401
	Prkcsh	-0.0599459	0.645509
	Fcgrt	0.224476	0.212088
	Nosip	-0.0020591	0.0153744
	Pih1d1	0.146066	1.5273
	Rps11	0.0916083	1.05587
	Supt5	-0.0103508	0.0946404
	Paf1	-0.0458623	0.561715
	Timm50	-0.0014697	0.00781171
	Med29	-0.0056875	0.0225019
	Ncstn	-0.0442867	0.464235
	Pex19	-0.0202183	0.182375
	Impdh1	-0.166832	2.47145
	Dusp3	-0.184875	1.48799
	Prodh	-0.0502273	0.078159
	Ess2	-0.0380914	0.327324
	Slc25a1	-0.0887043	0.774444
	Dgcr6	-0.107516	0.524511
	Ddr1	0.00964424	0.0240704
	Ier3	-0.5015	4.56704
	Fosb	0.700324	0.998641
	Klc4	0.101854	0.329086
	Ercc1	-0.15571	1.85306
	As3mt	0.390912	0.679845
	Homer3	-0.222975	0.950321
	Crtc1	0.0736161	0.532846
	Rnf215	0.0391643	0.143374
	Sec14l2	-0.0935301	0.0980207
	Aven	0.0468281	0.39597
	Crot	0.0122537	0.091421
	Rps6ka1	-0.159898	2.59384
	Snrnp200	-0.0429381	0.569509
	Ciao1	0.154177	1.23105
	Taf6l	-0.185387	1.10329
	Insig2	-0.0299674	0.137822
	Kpna6	-0.0828765	0.979269
	Man1a	0.0467704	0.413511
	Itpkc	-0.0354227	0.124542
	Coq8b	-0.151021	0.9543
	Brd8	-0.0458806	0.403986
	Kif20a	0.113596	1.42856
	Farsa	-0.0254434	0.252423
	Gcdh	-0.090826	0.890802
	Mast2	-0.0884743	0.959369
	Dnase2a	-0.261034	1.3544
	Rad23a	0.0182481	0.165818
	Calr	-0.113897	1.06854
	Syce2	0.100823	0.759612
	Nfat5	-0.389826	4.67977
	Nob1	0.0285406	0.246712
	Nqo1	0.406979	1.09688
	Ppfia3	-0.491663	1.26949
	Gys1	-0.195883	1.44543
	Ruvbl2	0.0111878	0.0691477
	Bax	0.0792704	0.876491
	Il7r	0.211201	0.934006
	Tfam	0.0364517	0.37487
	Zfp81	0.0756351	0.609862
	Efnb3	-0.450224	0.923262
	Mmd	-0.204067	1.98888
	Fam162a	0.00415249	0.0174463
	Rpl8	0.0772341	0.781421
	Ssbp2	0.435973	3.30884
	Fancl	0.135929	1.33721
	Gstm5	-0.880305	2.25712
	Stat3	-0.0857547	1.27151
	Stat5a	-0.053798	0.691269
	Map3k11	-0.046257	0.405226
	Akt2	-0.0854497	1.0858
	Dnaja3	-0.0893049	1.03831
	Hmox2	-0.0046019	0.0300108
	Cdip1	0.11773	0.625327
	Map3k20	-0.0695921	0.137721
	Cwc15	0.0821565	1.38823
	Dnmt1	0.0583278	0.56411
	Ppan	-0.103749	0.991941
	Trmt10a	0.00682541	0.0390014
	Kifc2	-0.750388	1.05835
	Psap	0.196227	2.8386
	Ikbkg	-0.0145301	0.108992
	Wars2	-0.0695181	0.357359
	Atn1	0.134036	0.364078
	Phb2	0.0352159	0.325321
	Ptpn6	0.5434	5.26394
	Emg1	0.034272	0.280208
	Lpcat3	-0.22781	2.4684
	Atp6v1f	0.0508043	0.309942
	Clcn5	-0.151761	1.43488
	Clcn3	0.0265713	0.207312
	Hif3a	-0.339229	0.506725
	Utp20	-0.143559	1.91425
	Cul3	0.0115996	0.10991
	Large1	-0.0583978	0.141064
	Ddx56	-0.0112277	0.0717682
	Tmed4	-0.123717	1.08342
	Bid	-0.0178807	0.114425
	Ralb	-0.424561	2.62279
	Ppp1cc	0.0961705	1.27558
	Dnajb11	-0.0939094	0.974473
	Tbccd1	-0.202244	1.84384
	Clec11a	0.38543	0.32353
	Zfp324	-0.0350152	0.15061
	Gab2	-0.124031	0.641834
	Coro1c	-0.0214066	0.192467
	Tax1bp1	-0.0084784	0.0660101
	Psg17	-0.436828	0.682102
	Ctse	-0.155501	0.824868
	Ndrg2	0.226055	1.45834
	Mettl17	-0.0175044	0.0562889
	Arhgef40	0.185053	0.27569
	Pnpla6	-0.380664	3.28748
	Mcoln1	-0.0952441	0.446648
	Arhgef18	0.225978	0.981325
	Pkn2	0.0949044	1.33888
	Etfb	-0.0271808	0.0797138
	Nkg7	-0.0687483	0.926389
	Stxbp2	-0.0712331	0.860491
	Chn2	-0.569345	2.18477
	Wwox	0.114389	0.622691
	Slbp	0.138541	2.46068
	Arid3b	-0.143555	0.994549
	Cnn2	0.0089762	0.0736929
	Polr2e	-0.0119291	0.0883125
	Myo9b	-0.138562	2.4439
	Ly9	0.237435	3.38613
	Cd244a	-0.43667	3.02669
	Mtfp1	0.156734	0.491043
	Rab23	0.123638	0.819276
	Rab11a	0.0213976	0.169321
	Eif2b2	-0.0309281	0.259666
	Dlst	0.0578461	0.832468
	Pgf	0.402025	0.648595
	Ulk2	0.00976132	0.052987
	Dgkq	-0.208844	1.35002
	Grap	0.12997	1.69843
	Chmp2b	0.0200012	0.121061
	Plod3	-0.107564	0.729265
	Ap1s1	0.114732	1.27074
	Srpk1	-0.0331801	0.240606
	Lbr	0.157595	2.94115
	Prcc	0.0984299	1.24147
	Rrnad1	-0.228077	1.54246
	Hdgf	0.0502365	0.74119
	Thop1	-0.0791922	0.630122
	Apba3	-0.024025	0.101682
	Matk	0.673171	0.642164
	Pias4	-0.0790319	0.661661
	Map2k1	-0.144105	1.63653
	Sgta	0.033173	0.316217
	Tmem242	0.100941	0.848971
	Dtx2	-0.0991458	0.721454
	Rasa4	-0.27278	1.42511
	Hnrnpa2b1	0.0243022	0.288298
	Ccdc130	-0.261695	1.41827
	Mri1	0.0971136	0.916986
	Prkacb	0.13849	1.68664
	Sgsh	0.100164	0.424814
	Chd5	-0.878629	2.11978
	Cstb	-0.0853377	0.490039
	Sh2b2	-0.278855	0.345954
	Pex5	-0.109861	0.676733
	Jkamp	0.0004213	0.00217732
	Cd44	0.0605247	0.455043
	Eif2ak4	-0.0732442	0.568284
	Wdr1	-0.074854	1.01447
	Slc2a9	0.212573	1.0942
	Ndrg1	0.0531457	0.365219
	4930550C14Rik	-0.247158	0.214057
	Man2b1	-0.0712131	0.964293
	Wdr83	0.0149537	0.0841818
	Prdx2	0.170935	1.69896
	Polr2a	-0.0472676	0.446569
	Senp3	0.0052085	0.0379384
	Plekha8	-0.306936	0.900711
	Spc25	0.127989	1.30541
	Ufd1	-0.0009824	0.00710938
	Zfp287	0.18414	1.29482
	Letm1	-0.0325236	0.327056
	Ubqln1	-0.0317079	0.40609
	Txn2	0.0417297	0.496631
	Crbn	0.0356522	0.216649
	Msh6	0.0564371	0.587867
	Fbxo11	-0.0482286	0.313825
	Tbl2	-0.0831946	0.933694
	Bud23	-0.0404505	0.309743
	Nid1	-0.832016	1.44405
	Mcm5	0.134225	2.07725
	Hmox1	-0.31802	1.45796
	Mprip	0.0492258	0.47712
	Cic	-0.112892	1.51024
	Pafah1b3	0.239023	1.48682
	Il27ra	0.0320559	0.203342
	Prkaca	-0.0023097	0.0168464
	Asf1b	0.200784	2.85015
	Myl10	0.253893	1.55384
	Ddx39a	0.0523834	0.432516
	Dnajb1	0.123409	1.21444
	Usp40	-0.359978	2.17415
	Kbtbd4	-0.0994506	0.897371
	Celf1	0.0354801	0.240935
	Ndufs3	0.0668723	0.559349
	Por	-0.169221	2.05671
	Igf1r	0.745443	1.47155
	Insr	-0.100607	0.473307
	Trim28	0.0836946	1.37432
	Ube2m	-0.0830637	1.10487
	Ctr9	0.00716325	0.0547143
	Eif4g2	-0.0198477	0.201782
	Irag1	-0.163253	0.706158
	Pcyt1a	0.112159	0.95205
	Zfp592	0.0156852	0.0928749
	Psmd4	-0.0030023	0.0253175
	Tmod4	-0.639644	0.608268
	Insrr	-0.512869	2.17689
	Snx6	0.0609445	0.625979
	Mthfd2	-0.0771515	0.823126
	Kit	-0.459354	2.2214
	Tomm40l	0.0129372	0.0793485
	Apoa2	-0.530181	1.1373
	Pan2	-0.073764	0.535129
	Cs	-0.0184099	0.179843
	Bcas2	0.0166853	0.147737
	Sh2d1a	0.223533	1.66023
	Ctcf	0.0787589	1.00665
	Pard6a	0.17075	0.923975
	Tfap4	0.170011	0.685205
	Ranbp1	0.0365924	0.294252
	Cd247	0.00628724	0.0560415
	Rfx5	0.0070795	0.0246783
	Psmb4	0.0620922	0.48928
	Slc30a4	0.110565	1.63958
	Sqor	-0.426431	0.45167
	Bloc1s6	0.0164121	0.120505
	Metap1	-0.0901848	1.28525
	Gpr108	-0.0939453	0.931048
	Tnfsf14	0.0211899	0.070929
	Rsl1d1	0.0381885	0.301275
	Apc	-0.0108934	0.0767201
	Reep5	-0.0969739	1.07792
	Ergic3	0.00571166	0.0447907
	Uqcc1	-0.0628537	0.625166
	Spo11	0.111159	0.185768
	Ncoa2	0.0684982	0.743726
	Nr2c2	0.0267588	0.230958
	Nr2c1	-0.0796873	0.528529
	Smpd4	-0.0257386	0.214987
	Pex1	-0.0160506	0.0911069
	Kctd20	0.105005	1.47241
	Itgae	0.819796	1.67307
	Ctns	-0.250827	1.62107
	Shpk	-0.230148	0.94376
	Tuft1	-0.248304	1.38767
	Rcn1	0.155817	1.73163
	Trap1	0.0989852	1.49742
	Naa60	-0.0622488	0.492393
	1700037C18Rik	-0.0291331	0.0758762
	Ankrd13d	-0.168101	0.484392
	Tpr	0.0100712	0.10499
	Odr4	-0.0143578	0.0967577
	Dhx34	0.0641075	0.311079
	Kptn	-0.0124403	0.0611152
	Napa	-0.0866702	1.39248
	Sra1	-0.0419423	0.284044
	Atp5g1	-0.0559095	0.60437
	Snf8	-0.0818526	0.974245
	Tbcb	-0.0126178	0.0620903
	Inpp5k	0.262394	3.14351
	Crkl	0.0243936	0.266218
	Eps8l1	0.295989	0.140509
	Clint1	-0.0095541	0.0676846
	Prss16	0.0250746	0.0908564
	Cdkal1	0.0213399	0.128773
	Zbtb17	-0.0359277	0.274595
	Mob1b	-0.0933573	1.25567
	Atp6v1b2	-0.0789204	0.796504
	Eps15l1	-0.0231517	0.218613
	Tep1	-0.303039	3.73883
	Ttc5	0.00493773	0.0326064
	Osgep	0.0483502	0.43311
	Aamp	-0.0150028	0.146579
	Tmbim1	-0.148567	1.02132
	Arpc2	0.0258254	0.249816
	Kmt2b	-0.181906	3.03945
	Zbtb32	-0.299399	3.98079
	Upk1a	-0.300566	1.58976
	Tmem147	-0.0779425	0.628373
	Rps9	0.110549	1.09118
	Tfpt	-0.0462972	0.270987
	Susd2	-0.341722	0.498001
	Ggt5	0.107482	0.0983756
	Ggt1	0.157733	0.600977
	Crip2	0.334397	1.14206
	Crip1	0.424985	4.46793
	Cbfa2t3	0.436749	1.60687
	Fbln1	0.269318	0.66899
	Pgrmc1	0.0856005	0.690997
	Gcat	0.12491	0.364542
	Elovl1	-0.1199	1.51959
	Med8	-0.058719	0.550362
	Hyi	-0.397208	1.3914
	Cdc20	0.166436	1.90838
	Pfdn2	0.0213199	0.171666
	Rnf114	-0.0108174	0.111175
	C330007P06Rik	0.049377	0.548106
	Srm	-0.10941	1.2065
	Epha2	-0.12354	0.248608
	Rbm14	-0.118513	1.10372
	Actn3	0.172299	0.488686
	Zdhhc24	-0.302169	1.87887
	Bbs1	0.22491	0.336325
	Ndor1	-0.196885	1.4485
	Nsmf	-0.0598216	0.239733
	Pdk1	0.069751	0.692026
	Ptbp1	-0.0122145	0.118618
	Mvd	-0.214079	1.82464
	Cyba	0.0404903	0.227965
	Stimate	-0.179553	1.4793
	Sfmbt1	0.00888278	0.0696372
	Rundc3a	0.216926	0.423333
	Cdt1	0.103597	0.651365
	Snai3	-0.344051	3.94148
	Aprt	-0.0661605	0.574734
	Gtf2h1	-0.047095	0.450652
	Hfe	0.358492	0.463059
	Abhd1	-0.617482	1.80849
	Slc5a6	-0.0154869	0.0589328
	Aplp1	-0.342687	1.11343
	Qrich1	0.0345671	0.446101
	P4htm	0.185651	0.607683
	Usp19	-0.0376117	0.310376
	Pola1	0.173345	2.37307
	Cdc42	0.0557559	0.677953
	Pknox1	0.0592867	0.537874
	Gmnn	0.148254	1.8178
	Acot13	-0.0333061	0.145126
	Cyp27b1	0.210581	0.229435
	Cdk4	0.145074	2.02182
	B4galnt1	-0.0049583	0.0429093
	Mettl1	-0.0174171	0.094568
	Tspan31	-0.312978	3.37035
	Kif5b	-0.0552579	0.761406
	Saal1	0.069623	0.587009
	Cnp	0.033692	0.387829
	Sulf2	0.0954352	0.193335
	Sod2	0.0280619	0.241717
	Tmco6	0.0408917	0.168178
	Stambp	0.0364209	0.235987
	Ezh1	0.0148564	0.0743624
	Ctnnb1	0.0719434	1.00023
	Eif1b	-0.0468298	0.357781
	Psmd2	-0.0427276	0.41351
	Syngr3	1.46899	3.97337
	Vars	-0.0167431	0.138432
	Vwa7	-0.187679	0.208939
	Msh5	-0.142685	0.474255
	Abhd16a	0.090176	0.992209
	Neu1	-0.343185	2.56116
	Ddah2	0.137743	0.498559
	Clic1	0.0721938	0.71852
	Lsm2	0.0201904	0.14761
	Pole	0.014462	0.107193
	Stx1a	0.122323	0.141359
	Zfp775	-0.0104202	0.0367164
	Mrpl49	-0.0293185	0.21511
	Dennd2c	0.176025	0.999692
	Mark3	-0.0658041	0.922966
	Gatad1	0.00142224	0.0101594
	M6pr	-0.107868	1.40833
	Lrrc8a	0.0408678	0.119626
	Ppp2r1a	0.0191747	0.210692
	Fance	0.0349647	0.151383
	Tinf2	-0.0417426	0.380912
	Tssk4	-0.215468	0.358212
	Dus3l	-0.11677	1.02478
	Gtpbp3	-0.129534	1.0025
	Tgfbr1	0.387734	4.93601
	Homer1	-0.142948	1.14852
	Rad51c	0.18656	0.730055
	Arpp19	0.0342948	0.303071
	Bcl2l1	-0.122434	0.912134
	Khsrp	-0.0202706	0.156207
	Dio2	0.750753	1.54167
	Ccdc124	-0.0041067	0.0158607
	Cct4	0.0578152	0.564176
	0610009B22Rik	-0.142233	0.564781
	Zfp655	0.117856	1.34146
	Rhoa	0.103114	1.83266
	Zmiz1	-0.249998	2.62636
	Ankrd26	-0.225683	2.73747
	Aldh16a1	0.0946856	1.16106
	Hnrnpa0	0.0540771	0.293224
	Prrg2	0.133589	0.193778
	Hnrnph1	-0.083376	1.12567
	Ift43	-0.48026	0.789495
	Id3	0.64143	2.30324
	Arid1a	-0.0421418	0.34694
	Ctsd	-0.278671	2.71442
	Rplp1	0.0662641	0.47711
	Abhd8	0.19314	1.2863
	Ift22	-0.147143	0.498356
	Mid1ip1	-0.0122816	0.074689
	Ap2s1	0.0271001	0.149028
	Fgfrl1	-0.412286	1.42685
	Brme1	-0.0662995	0.148595
	Fhl2	-0.185899	1.12977
	Emc10	0.0742963	0.70528
	Fbxw9	0.143649	0.716941
	Fnbp4	0.0146305	0.0898503
	Cers4	0.0654091	0.43238
	Scrn3	0.189422	0.744195
	Phax	0.0802834	0.854639
	Tle1	0.740249	3.72169
	1700109H08Rik	-0.453802	1.94424
	Relt	-0.098518	1.02597
	Snrpb2	0.0289893	0.268659
	Ubc	0.056288	0.26458
	Prpf31	-0.0120987	0.102981
	Sertad1	-0.114354	0.544832
	Carhsp1	0.113983	1.13509
	Elk3	-0.185558	2.40521
	Herpud2	-0.0169469	0.104416
	Rdh13	-0.0364518	0.236046
	Nutf2	-0.0327482	0.196568
	Arpc5	0.042965	0.382393
	Pou2f2	-0.0162469	0.0493054
	Ubqln4	-0.0107724	0.0842944
	Rps18	0.114655	0.83111
	Rpl10	-0.0198267	0.207529
	Rps15a	0.0890929	0.903329
	Ncaph2	0.132881	2.05784
	Hipk1	0.0970174	1.16487
	Gprc5b	-0.765831	0.7317
	Man1a2	-0.0102142	0.0832767
	Acyp1	-0.0004962	0.00128657
	Hdac5	0.475379	2.70618
	Rala	-0.0261471	0.177245
	Vdac3	0.0192752	0.152534
	Vps72	0.013456	0.0950457
	Gabpa	0.0216058	0.242239
	Bmp7	-0.0714181	0.0563139
	Dynll1	-0.0127932	0.0717481
	Pdcl	0.0720773	0.681664
	Tmem184b	-0.20533	1.90009
	Nf2	-0.0409521	0.487312
	Zmat5	0.0230112	0.130054
	Ewsr1	0.0128614	0.144601
	Ap1b1	-0.0335792	0.37052
	Derl3	0.795379	1.44009
	Gnat2	-0.399105	0.487644
	Bcl2l13	-0.0047296	0.0406197
	Dqx1	-0.115076	0.205461
	Lnpk	0.0116461	0.0827724
	Pttg1ip	0.0947696	0.909894
	Ube2g2	-0.0185268	0.133752
	Met	-1.21672	3.54559
	Elk1	-0.188556	1.977
	Nav1	1.42516	2.3843
	Tnpo1	-0.0307598	0.349187
	Rnmt	0.116279	1.70313
	Srp14	-0.0276764	0.179384
	Cdk9	-0.0656481	0.921298
	Tor2a	-0.0623569	0.464588
	Fpgs	-0.0779414	0.44981
	Mrtfb	0.028361	0.175641
	Cbx5	0.0365313	0.243054
	Apobec3	0.0221887	0.192863
	Vav2	0.151656	0.683258
	Tex15	0.0931025	0.281507
	Ppp2cb	0.0288198	0.335852
	Dmap1	-0.0269969	0.162685
	Mcu	-0.225926	2.02161
	Oit3	-0.319534	1.39487
	Tex11	-1.49005	0.420577
	Bcr	-0.516638	5.13432
	Fxyd5	-0.0187917	0.166621
	Kcnd1	-0.39188	0.49253
	Tfcp2	-0.188015	0.586374
	Pou6f1	-0.24162	0.201412
	Ubp1	-0.0428753	0.353829
	Nuak2	0.0111735	0.0131996
	Cilk1	-0.0828964	0.318998
	Sdhb	0.0781478	0.789904
	Snap47	-0.0144016	0.0613488
	Kdsr	0.25755	1.29331
	Vps4b	0.00764071	0.0736049
	Rps25	0.108158	1.00782
	Taz	-0.216272	1.36535
	Kif19a	-1.32678	1.18014
	Aldh3a2	-0.0016916	0.0113671
	Zmynd10	-0.799288	1.58468
	Tmem115	-0.0197248	0.138932
	Hyal2	-0.29015	1.40496
	Ifrd2	-0.0290095	0.200903
	Hyal1	-0.109469	0.120978
	Tusc2	0.121193	0.827712
	Nprl2	-0.175254	1.98929
	Cacna2d2	0.0470844	0.0485037
	Rassf1	-0.116358	1.76735
	Slc3a2	-0.12126	1.74649
	Nxf1	-0.0931239	1.28811
	Stx5a	-0.0826745	0.669418
	Tnfrsf13b	0.0349345	0.131677
	Spire2	-0.742307	1.22224
	2610507B11Rik	-0.043431	0.54437
	AI597479	0.0609383	0.422082
	Tmem86a	0.154397	0.171909
	Tex14	-0.189982	0.139557
	Ifi35	0.0488321	0.467782
	Rdm1	0.402807	2.15338
	Nedd8	0.0594388	0.530588
	Gosr1	0.00667024	0.0430861
	Mrpl52	-0.0173509	0.0648733
	Kansl3	-0.0945993	1.28044
	Faf1	0.0694568	0.916885
	Tsacc	-0.826867	2.17958
	Mettl16	0.0302984	0.276901
	Pigyl	-0.220297	1.11769
	Rbm25	-0.0180188	0.19718
	Psen2	-0.0734577	0.550225
	Plcd1	-0.0394436	0.0525858
	Fads1	0.0572351	0.529117
	Lmbr1	0.445704	1.45576
	Tnfrsf22	0.219252	1.24795
	Cars	-0.143835	1.46457
	Kdelr3	-0.150965	0.264269
	Apip	-0.106358	0.689589
	Pdhx	0.040154	0.277572
	Vac14	-0.0740449	0.870345
	Mcoln2	0.121062	0.698438
	Akt1s1	-0.0182773	0.0676022
	Tbrg1	-0.0177153	0.147545
	Adssl1	-0.138864	0.580946
	Brf1	-0.180774	2.50049
	Odc1	0.0860804	0.817509
	Thg1l	0.00531595	0.0301512
	Adam19	-0.120726	1.13385
	Pabpc4	0.0119688	0.112676
	Exoc3l2	-1.00566	1.04223
	Zfp296	0.0179375	0.0509732
	Sugp1	0.0265958	0.253848
	Dhdh	-0.0892292	0.266168
	Zfp790	0.0332021	0.165282
	Fuz	0.193902	0.959955
	Pgam1	0.00774366	0.0497201
	Evi5	0.424082	1.05291
	Evi5l	-0.198509	1.26805
	Snapc2	-0.105055	0.552563
	Git1	-0.100265	1.38299
	Gltp	0.0846174	1.06472
	Bnip2	-0.100871	1.72365
	Ccnt1	-0.0381618	0.409544
	Brms1l	0.139694	0.953625
	Med15	-0.0558207	0.671719
	Dhdds	-0.0233401	0.222618
	Crybg2	-0.0386735	0.102753
	Ubxn11	-0.279539	2.02612
	Tjap1	-0.0064958	0.0449567
	Rpl15	0.079435	0.9256
	Tmem167	0.0504723	0.581149
	Mplkip	0.148775	1.09258
	Kif11	0.165152	2.75064
	Rpa3	0.178999	2.15677
	Mlkl	-0.0827186	0.495496
	Tnpo3	0.00384076	0.0354864
	Ttll5	-0.0527362	0.331275
	Zfp715	-0.124749	1.26987
	Cdh23	-0.385286	1.43511
	Rps5	0.0959409	1.09203
	Podnl1	-0.0734903	0.383012
	Adgrl1	0.322649	1.4246
	Amotl1	-0.514972	2.82161
	Etv5	-0.293103	2.99653
	Gfod2	-0.121938	0.345157
	Enkd1	0.0819368	0.467016
	Atp6v0d1	-0.0206225	0.153376
	Ptprs	0.19307	0.959476
	Slc41a1	-0.0378249	0.14869
	B4galnt2	-1.50807	4.51447
	Nelfb	0.0338235	0.387084
	Tmem175	0.0407691	0.225566
	Tango2	-0.0112898	0.0610501
	Ndufs2	-0.0227229	0.221905
	Atraid	-0.0073986	0.0377022
	Cad	-0.0694455	0.623184
	Sh3bp5l	0.10329	0.924621
	Atad1	0.0527353	0.650259
	Pten	0.162197	2.88643
	Pea15a	0.00422925	0.0200013
	Timm23	0.140088	0.978348
	Tnfaip8l2	0.336582	3.0681
	Trnt1	-0.065543	0.810512
	Ehmt2	-0.0121739	0.0770968
	Elof1	0.0434498	0.2673
	Med16	0.0563582	0.355986
	St3gal1	0.218169	1.38189
	Tmem259	-0.0714692	0.700607
	Rnf170	-0.315272	2.39337
	Dedd	-0.0224435	0.176592
	Nit1	-0.0309329	0.146134
	Prdm15	-0.134793	0.945535
	Rnf168	0.125725	1.8417
	Dynlt2b	0.311884	0.513798
	Chp1	-0.0556166	0.675009
	Trpv4	0.679177	0.921841
	Klhl3	0.650072	0.504694
	Tvp23b	-0.130567	1.37953
	Dnajc7	-0.0051744	0.0454572
	Cacybp	0.0901468	1.14531
	Cluap1	-0.0875269	0.369505
	Zswim7	-0.185196	1.01455
	Pigl	-0.0783546	0.458292
	Ndufa2	0.0624117	0.442047
	Pam16	-0.0273357	0.132899
	Glis2	0.262299	0.397324
	Cox6c	0.0984216	1.16837
	Ube2z	-0.0021134	0.017642
	Tmem87b	-0.0512113	0.229004
	Anapc1	-0.0323523	0.360662
	Tsg101	-0.0423325	0.366244
	Hps5	-0.122767	0.937116
	Map3k4	0.0335607	0.223738
	Piezo1	-0.145164	1.74053
	Rnf166	-0.0074081	0.0424602
	Ankrd28	0.0810412	0.953156
	Ankrd52	-0.130637	1.62908
	Srp19	-0.135644	1.84728
	Wdfy2	-0.145088	0.999717
	Rbsn	-0.0388834	0.414807
	Mrps25	-0.0828271	0.668527
	Dguok	0.0915378	0.535026
	Camta1	-0.0256544	0.115989
	Csf1	-0.223161	0.370565
	Strip1	-0.0660454	0.582145
	Slc25a11	-0.0078765	0.0582868
	Chrne	-0.652762	0.902201
	Cmc2	-0.0903131	0.500894
	Chfr	-0.0241307	0.253527
	Ceacam16	-0.930281	5.84838
	Tex261	0.00650896	0.0501051
	Fam120b	-0.0199256	0.155331
	Tbp	0.0956779	1.10949
	Psmb1	0.0758586	0.665049
	Pdcd2	-0.002283	0.0109123
	Fhod1	-0.101914	0.983058
	Plekhg4	-0.52121	2.25562
	Slc9a5	-0.261252	2.29381
	Elmo3	-0.135879	0.487321
	4931428F04Rik	-0.233428	1.60134
	Tppp3	0.264836	0.248242
	Msh3	-0.0576363	0.337985
	Tmem208	0.0319618	0.196544
	E2f4	-0.0792994	1.04651
	Surf4	-0.0822044	0.790629
	Surf2	-0.126456	1.76635
	Dnajb9	0.140994	0.886019
	Naf1	0.0446412	0.31341
	Yes1	0.256111	0.776903
	Ppp1cb	0.154469	2.68912
	Gorasp2	-0.117038	1.57024
	Tsen15	-0.158444	1.06184
	Efr3a	0.0365597	0.429841
	Trappc2l	-0.0579271	0.332765
	Acsf3	0.14615	1.39973
	Ddx19a	0.045118	0.511107
	Galns	0.0620176	0.493269
	C8g	0.44819	0.647948
	Rabl6	0.0116696	0.112544
	Edf1	-0.0672096	0.514257
	Npdc1	-0.0644532	0.0803804
	Fbxw5	-0.0919276	0.896595
	Slc25a13	-0.303575	2.85827
	Ube2i	-0.178706	3.22414
	Tsr3	0.0380682	0.261495
	Unkl	-0.0797222	0.687979
	Lrrk1	-0.44707	3.93594
	Aldh1a3	0.354391	0.622782
	Actn1	-0.12607	0.522262
	Sirt2	-0.0615414	0.584466
	Hnrnpl	0.0497156	0.678356
	Nolc1	-0.0436246	0.499817
	Casd1	-0.10294	0.639442
	Cnksr3	0.716738	1.72265
	Mtmr1	-0.0272221	0.300851
	Hmgb3	0.0650273	0.481472
	Map2	0.814978	0.362157
	Abca1	-0.0199862	0.0461529
	Nipsnap3b	-0.11259	1.04325
	Lage3	0.10846	0.686149
	Ubl4a	0.0597392	0.569327
	Gdi1	-0.313207	2.66814
	Gadd45b	0.0376454	0.147684
	Slamf6	0.612011	1.54812
	Slamf1	0.600755	2.8411
	Zdhhc12	-0.283276	2.74789
	Endog	0.0212691	0.0696069
	Golga7	-0.0410374	0.436067
	Xk	0.0628039	0.197147
	Cd48	0.14729	2.74954
	Clpx	-0.0552243	0.434818
	Trabd	-0.150773	1.79896
	Dennd6b	-0.303316	1.24633
	Cd83	0.416698	0.255254
	Gzmb	-0.137616	0.588741
	Gzmf	-1.91758	4.46654
	C4a	-0.399504	0.868838
	Ager	-0.536397	1.49919
	Atf6b	-0.125399	1.69326
	Egfl8	-0.863961	1.14766
	Ppt2	0.223487	0.529443
	Prrt1	0.25949	0.256255
	Rnf5	-0.0517846	0.341451
	Cacfd1	-0.188156	1.74589
	Hivep2	0.13572	0.809889
	Arnt	0.0048167	0.0382594
	Itga2	-0.0551796	0.187521
	Mocs2	0.0003113	0.00179658
	Nat9	-0.286524	1.40137
	Atp6v0e	0.0732433	0.720082
	Zfp318	0.35468	1.3484
	Srf	0.0133432	0.0761794
	Gata3	0.140028	0.83515
	Lama5	-0.558583	3.99922
	Hspa8	0.0730366	0.8653
	Serac1	-0.309313	1.41651
	Pdzd11	-0.0582879	0.556802
	Psma2	0.0838738	0.894395
	Mrpl32	-0.0100788	0.0583169
	Setdb1	-0.0780456	0.783988
	Anxa9	-0.331983	1.16388
	Arnt2	-1.00033	4.41766
	Prune1	-0.121955	0.93297
	Cers2	-0.131569	1.94233
	Capza2	0.0296468	0.272084
	Plekho1	0.0985879	0.257176
	Vps45	0.00976053	0.047753
	Prpf3	-0.0175525	0.169085
	Anp32e	0.178498	3.07246
	Aph1a	0.106958	1.13543
	Tab2	-0.0103933	0.093026
	Ppil4	0.0711283	0.858849
	Cnih1	0.0111198	0.0865173
	Eps8	-0.356389	3.68975
	Med22	-0.0537899	0.515808
	Surf1	-0.0421216	0.254502
	Med28	0.0649711	0.468746
	Qdpr	0.0436546	0.363591
	Gnrh1	0.27952	0.457367
	Sqstm1	-0.0916834	0.670913
	Nfe2l2	0.422989	4.98117
	Rxra	0.970144	4.57176
	Adamtsl4	-0.45431	0.281596
	Prpsap1	-0.0386875	0.281098
	Ncapg	0.152359	1.79731
	Lcorl	0.115501	1.0321
	Lta4h	0.0510034	0.642659
	Amdhd1	-0.0546587	0.0292171
	Dstn	0.125574	1.0402
	Macroh2a1	0.225473	4.29585
	Gtf2ird2	0.115542	0.477992
	Bola1	-0.151993	0.417084
	Castor2	-0.518663	3.66144
	Ncf1	0.32917	0.962858
	Adss	0.124726	1.97057
	Actr8	-0.0443153	0.307313
	Lrrc27	-0.0646108	0.172767
	Stk32c	-0.233337	1.3967
	Fnta	0.0157755	0.109506
	Mtrex	0.00836272	0.0836725
	Celsr1	-0.0747447	0.598909
	Fli1	-0.0351902	0.401579
	Utp25	0.0323267	0.247865
	Hsd11b1	0.150662	1.46512
	H2-M3	-0.0256125	0.173548
	Lonrf3	0.493802	1.18171
	Atp5e	0.198364	1.32778
	Nelfcd	0.0434753	0.477253
	Ctsz	0.0888931	1.07772
	Prelid3b	0.00595732	0.0415203
	Ube2a	0.0665922	0.471069
	Slc25a5	0.0352372	0.334364
	Ppdpf	0.102692	0.529917
	Col20a1	0.043366	0.0328717
	Pls3	0.328195	0.444838
	Nkap	0.0363661	0.339899
	Ndufa1	0.0915414	0.934326
	E2f3	-0.0890285	1.31493
	Cr1l	0.0311365	0.238708
	Ppfibp1	0.105664	0.555482
	Cd46	-0.0509927	0.0706642
	Plgrkt	-0.0539444	0.37347
	Cd274	0.0986792	0.593135
	Pdcd1lg2	-0.245327	2.38921
	Gtf3a	0.0409997	0.360319
	Mtif3	0.0425293	0.265207
	Lnx2	0.00943041	0.0679071
	Dyrk3	0.359217	3.71722
	Mapkapk2	0.0340377	0.349885
	Il10	-0.224179	0.554665
	Lamp2	0.0426108	0.390634
	Atxn10	0.0389439	0.42734
	Foxred2	0.110393	0.589467
	Eif3d	0.0177378	0.154362
	H3f3b	0.0772267	0.822066
	Nup50	0.0117306	0.100349
	Phf21b	-0.0699849	0.134306
	Ift27	0.142756	1.08044
	Pacsin2	-0.123188	1.38462
	Cmah	0.38779	1.37783
	Ttll12	-0.0424232	0.339125
	Bik	-0.1167	0.230608
	Tox4	0.00638734	0.0532184
	Mrps18c	0.109565	0.521842
	Sulf1	-1.02319	1.21094
	Srsf6	0.0597133	0.922404
	Plcg1	0.00837345	0.0497363
	Kctd2	-0.0423623	0.20778
	Tmprss6	-0.402477	0.52779
	Kctd5	-0.0508787	0.523103
	Etaa1	0.0978018	1.08966
	Slpi	1.10287	0.947256
	Nbr1	-0.0265046	0.164393
	Cyth1	0.169839	1.51211
	Brca1	0.116234	1.59652
	Nt5c3b	0.186285	2.305
	Coa3	0.102497	0.813232
	Zpbp2	0.279218	0.587518
	Med24	-0.0173586	0.124237
	Psmd3	-0.0746548	0.886521
	Exosc10	0.0235108	0.269993
	Glod4	0.113984	1.51227
	Vps53	-0.0414382	0.387585
	Taok1	-0.117437	1.70269
	Dnttip1	0.0623936	0.602128
	Acot8	-0.114474	0.756664
	Mpp2	0.247543	1.52917
	Nlk	-0.167714	1.54132
	Traf4	0.232414	2.21541
	Aldoc	0.0270831	0.0488658
	Stac2	-0.0117159	0.0150006
	Rpl19	0.152182	1.69786
	Nek8	0.183056	1.29247
	Cacnb4	0.135472	0.250468
	Plxdc1	-0.164941	1.05658
	Arl5b	0.0496116	0.237663
	Zfp207	0.0402	0.422438
	Psmd11	-0.0074619	0.0679948
	C1qtnf1	0.773177	1.24264
	Pipox	-0.260172	0.316268
	Timp2	1.15647	2.90532
	Zc3h18	-0.0898457	1.38271
	Top2b	0.102981	1.11094
	Igfbp4	1.06757	4.07113
	Cdc6	0.0653139	0.799582
	Suz12	0.10446	1.64581
	Atad5	0.00033588	0.00263519
	Crlf3	0.0684415	0.706401
	Tnfaip1	0.075414	0.550589
	Abr	-0.200119	3.09812
	Rab11fip4	-0.509479	3.85939
	Cd40	1.21758	2.28434
	Slc35c2	-0.161219	2.64695
	Elmo2	-0.290955	3.28073
	Wsb1	-0.0104673	0.0715621
	Ttpal	0.0136272	0.12289
	Rhot1	-0.113735	1.22409
	Rhbdl3	-0.812817	1.7739
	Ada	0.163976	1.22228
	Serinc3	0.132161	1.89258
	Tha1	0.178272	0.414912
	Pgs1	-0.169884	2.84724
	Birc5	0.119648	1.4074
	Afmid	-0.153684	0.79534
	Pigt	-0.0127893	0.091518
	Etv4	-0.417638	2.66524
	Mmp9	0.36953	0.911348
	Ghdc	-0.32297	2.09265
	Pltp	0.0437698	0.144634
	Slc12a7	-0.198836	0.988814
	Ctsa	0.0992151	1.45434
	Zswim1	0.0535047	0.340674
	Slc12a4	-0.296066	3.40124
	Myo1c	0.500226	3.44644
	Crk	0.0599987	0.699472
	Cox7c	0.0828619	0.918122
	Pitpna	0.0662309	0.937556
	Mlx	-0.0221612	0.131936
	Retreg3	0.161847	1.73682
	Dhx58	-0.0350299	0.173922
	Rab5a	0.0150113	0.107348
	Nkiras2	-0.0960582	1.01543
	Ppp2r5c	0.0232599	0.259228
	Ift52	0.0553256	0.618029
	Mybl2	0.042259	0.393494
	Eya2	-0.125019	1.17892
	B4galt5	-0.190372	2.38346
	Ddx27	0.0264792	0.281304
	Cyth3	0.0248444	0.125836
	Cyth4	-0.169509	2.07791
	Rac3	-0.67789	0.8106
	Rrp7a	-0.027158	0.228366
	Cyb5r3	-0.0650587	0.740512
	Ints2	-0.120465	1.51787
	Med13l	-0.111965	1.22777
	H2bc4	-0.101347	0.149731
	Mafk	-0.140628	1.16438
	Med1	-0.059731	0.877876
	Erbb3	0.0923036	0.422746
	Stard3	-0.109305	0.966825
	Ikzf3	0.199515	1.19631
	Mfng	-0.119304	1.88598
	Vmp1	-0.0994427	1.05263
	Uchl5	0.0913897	1.11684
	Glrx2	-0.10325	0.874789
	Ro60	-0.0456599	0.182109
	Stk4	0.133593	1.88558
	Zcchc10	0.0857815	0.864522
	Psmb6	-0.0049396	0.027266
	Spag7	0.0176556	0.118047
	Pfn1	-0.0011074	0.00801153
	Tomm34	-0.0788104	0.745936
	Ywhab	0.0900098	1.41124
	Ksr1	-0.35716	4.97774
	Anxa6	0.0702345	1.08093
	Il12rb2	0.0540477	0.295406
	Zkscan6	0.0405649	0.287455
	Kpna2	0.0548191	0.404523
	Smurf2	0.128055	1.03332
	Cep95	-0.052419	0.216037
	Vezf1	-0.0346426	0.354412
	Cuedc1	-0.129259	0.504672
	Srsf1	0.0913551	1.31974
	Abi3	-0.059176	0.355348
	Kif3a	-0.0368688	0.144786
	Septin8	-0.547707	1.63587
	Mtmr4	0.0939073	0.713805
	Mrm1	0.0041622	0.0166699
	Kansl1	0.0440646	0.391463
	Gid4	0.0441374	0.301118
	Myo1b	-0.425429	1.11194
	Dhx40	0.157837	1.54015
	Ypel2	0.392037	0.405009
	Akap1	0.101915	0.964282
	Nol11	-0.0148076	0.117667
	Derl2	-0.0409902	0.40598
	C1qbp	0.0529263	0.556631
	Rpain	0.0160448	0.0632588
	6330403K07Rik	0.967003	1.26539
	Kcnab3	0.0844792	0.117175
	Chd3	-0.0872008	1.03257
	Kdm6b	-0.187605	1.70594
	Appbp2	0.010517	0.104636
	Adora2b	-0.191406	0.706706
	Ncor1	0.0214743	0.227782
	Trpv2	-0.0809527	1.08098
	Cenpv	0.141978	1.17302
	Pcgf2	-0.10484	0.760117
	Cwc25	0.0639774	0.530978
	Pip4k2b	-0.118732	1.89356
	Trim37	0.118632	1.58941
	Ctdnep1	-0.0104507	0.101589
	Elp5	-0.0137924	0.105912
	Gabarap	-0.0256212	0.192355
	2810408A11Rik	-0.277123	0.467774
	Phf23	-0.0408608	0.432024
	Acadvl	0.0759745	0.623735
	Dnah11	-0.188667	0.260629
	G3bp1	0.0594027	0.653983
	Atox1	-0.0151765	0.0892086
	Mief2	-0.0745282	0.491597
	Dusp14	-0.331778	1.69309
	Tada2a	-0.0139094	0.0740474
	Ikzf1	0.0298347	0.227971
	Pnpo	-0.129336	1.20839
	Cog1	-0.154291	1.78925
	Cbx1	0.0471974	0.541208
	Cdk5rap3	0.02864	0.276383
	Copz2	-0.622228	0.782556
	Slc25a39	-0.0257734	0.261119
	Sp2	0.0577126	0.568506
	Aatf	0.0136218	0.122518
	Dync1h1	-0.0766651	0.611085
	Pex12	-0.0879808	0.701422
	Ndel1	-0.121584	1.08041
	Slc25a35	-0.335931	0.864304
	Zbtb4	-0.26387	1.38384
	Mpdu1	0.0266602	0.194444
	Fxr2	-0.0452269	0.355736
	Atp5g3	0.0563055	0.443898
	Cd68	-0.229212	0.802785
	Acsl1	-0.0341515	0.221613
	Abca5	-0.121368	0.195312
	Smyd4	-0.0851663	0.443092
	Lsp1	0.113217	2.03202
	Zfyve27	-0.216733	2.43446
	Avpi1	-0.291389	1.51596
	Rad51d	-0.0319878	0.197953
	Pank3	-0.112761	1.43559
	Rars	-0.0378805	0.336922
	Mrpl58	0.136216	1.37446
	Fdxr	0.0557876	0.394936
	Sult4a1	-0.583928	0.684249
	Mrpl45	0.0362026	0.310713
	Irf1	0.102413	1.17258
	Slc22a5	0.0123253	0.0518686
	P4ha2	0.185247	0.451823
	Arrb1	0.14012	1.02371
	Csf2	0.314624	0.482224
	Pelp1	-0.0261515	0.16846
	Med11	0.0844587	0.699813
	Heatr9	1.1247	2.31566
	Ccl4	-0.20432	0.62843
	Natd1	0.148503	0.792638
	Map2k3	-0.0773484	0.766624
	Ywhah	0.0457544	0.443697
	Sart3	-0.0317701	0.340338
	E2f2	0.342547	2.93526
	Slfn3	0.174901	2.11343
	Nars2	-0.122487	0.840505
	Slc35b4	-0.129543	1.32328
	Dalrd3	-0.0740224	0.50467
	Fis1	0.117307	1.6016
	Plod1	-0.0314192	0.0729754
	Rab3d	-0.0956849	0.595076
	Mfsd3	-0.246677	1.24202
	Slc25a22	-0.110767	0.876748
	Atp6ap1	-0.0571071	0.539474
	Dnase1l1	-0.0704791	0.239005
	BC005537	-0.0619758	0.824491
	Isyna1	-0.0702832	0.570318
	Hars2	-0.045923	0.313979
	Tmem160	0.0132034	0.0478311
	Rab5c	-0.0689786	0.767015
	Mdh2	-0.0825438	1.14901
	H13	-0.0858121	1.26345
	Rnf145	0.0891265	0.945921
	Scn1b	-0.282242	0.841353
	Atp6v1e1	-0.0391925	0.289972
	Chtf18	0.0523246	0.347707
	Rps6kl1	-1.31745	1.57411
	Ppp1r12c	-0.0856853	0.92188
	Ahr	0.37909	4.52125
	Map1s	-0.0744634	0.451391
	Tmem129	-0.0129272	0.0715217
	Nop9	-0.0009873	0.00716188
	Atp6v0a1	-0.646386	4.48754
	Psmc3ip	-0.0083061	0.0383295
	Grb7	-0.35992	0.281791
	Noxo1	0.0093482	0.0109463
	Aoc3	-1.28183	2.6462
	Zfp687	-0.0654748	0.487282
	D8Ertd738e	0.0110282	0.057465
	Calm3	0.105472	1.50604
	Cops3	0.111237	1.04407
	Fkbp8	-0.101989	1.17639
	Ddx39b	-0.0354484	0.395701
	Gipc1	-0.0634256	0.472636
	Tlcd1	0.0130195	0.0238175
	Plscr3	0.00959583	0.0341802
	Ptger1	0.572741	0.691307
	Arhgef25	-0.175149	0.386134
	Xab2	0.00301639	0.0244364
	Cdc37	0.0536106	0.746044
	Trip10	-0.276064	1.91142
	Cops6	0.0452857	0.375484
	Ubb	0.113313	1.68979
	Ap4m1	-0.0174581	0.0926905
	Gyg	0.00693845	0.0452593
	Rcn3	-0.118662	0.282281
	Slc6a8	-0.400383	0.597436
	Arid3a	-0.0225703	0.157628
	Ubxn6	0.0216994	0.11176
	Mydgf	-0.0309209	0.200455
	Cyb561	-0.0931378	0.158028
	Sema6a	-0.313723	0.307999
	Ccdc12	-0.0054565	0.0378541
	Fmc1	0.194826	0.987387
	Akt3	0.375512	2.91876
	Mrpl24	-0.0370559	0.325143
	Gle1	0.100527	1.32484
	Lyst	0.173246	1.05529
	Slc35e1	-0.0950651	1.44912
	Calr3	-1.02478	2.33953
	Tmc4	0.0174006	0.0316776
	Syne4	0.0643964	0.0823728
	Polr2i	-0.0731608	0.476197
	Krt10	0.737944	1.44632
	Rmnd1	0.00827608	0.030086
	Esr1	0.380309	0.798795
	Fbxo5	0.129221	1.68026
	Mtrf1l	0.0240064	0.100991
	Hdac2	0.0680142	0.869109
	Rwdd1	0.101484	1.0565
	Stxbp5	-0.13614	2.36836
	Hint3	-0.101697	0.545254
	Trmt11	0.219928	2.74008
	Katna1	0.125061	1.3445
	Pcmt1	0.11543	1.76191
	Lrp11	-0.387663	2.96994
	Mtres1	-0.169987	0.881775
	Sec63	-0.0814576	1.07174
	Snx3	0.0484648	0.512263
	Aig1	-0.151337	0.627196
	Adat2	0.0701947	0.362611
	Pex3	-0.0793723	0.799725
	Fuca2	-0.155195	1.39705
	Cep57l1	0.147659	1.0294
	Ltv1	-0.0911694	0.903044
	Cd164	-0.0804414	1.2054
	Utrn	0.084726	0.557537
	Smpd2	0.0496056	0.168081
	Mical1	-0.0906622	1.18271
	Zbtb24	-0.0887314	0.546736
	Rab32	0.306744	1.49769
	Gtf3c6	-0.0547877	0.385074
	Slc16a10	-0.318799	2.94955
	Rev3l	-0.0689203	0.499354
	Traf3ip2	0.0898962	0.705926
	Fyn	-0.06261	0.914269
	Tube1	0.177476	1.43046
	Prep	-0.042744	0.382211
	Tnfaip3	0.095522	0.346482
	Perp	0.111487	0.595852
	Arfgef3	-0.279061	2.72198
	Reps1	-0.0867672	1.18698
	Asf1a	0.248481	3.31658
	Gopc	0.015968	0.126233
	Qrsl1	-0.169639	1.49466
	Rtn4ip1	-0.162097	1.34957
	Crybg1	0.0699851	0.874197
	Vta1	0.0466748	0.392832
	Smpdl3a	0.542136	2.16079
	Reep3	0.220288	3.38808
	Serinc1	0.0261335	0.252971
	Hsf2	0.154487	1.12188
	Echdc1	-0.03684	0.229177
	Ptprk	0.00948863	0.0221711
	Dcbld1	0.747445	2.28047
	Ccdc59	-0.0491396	0.475283
	Ppp1r12a	0.025265	0.267291
	P4ha1	-0.0972673	0.945621
	Septin10	0.299692	1.52962
	Lims1	0.0630972	0.751464
	Zwint	-0.150335	2.11533
	Ube2d1	-0.0454889	0.390601
	Slc17a8	-0.830338	3.53785
	Cdk1	0.0911622	0.9456
	Atp2b1	0.115201	1.23722
	Cabcoco1	0.0449954	0.0708729
	Arid5b	0.209106	0.523444
	Actr6	0.0165718	0.082648
	Uhrf1bp1l	-0.053443	0.547237
	Poc1b	0.0414985	0.281118
	Dusp6	-0.0392371	0.24542
	Tmpo	0.157139	2.2706
	Psen1	0.012867	0.110007
	Sgk1	-0.0542149	0.402461
	Cep290	0.0226333	0.0522075
	Ikbip	-0.0427111	0.0829997
	Hbs1l	-0.111207	1.59948
	Epb41l2	0.0444872	0.415641
	Apaf1	-0.005886	0.0400875
	Myb	-0.200618	1.10333
	Med23	-0.0171074	0.123209
	Ahi1	0.00119862	0.00492715
	Nedd1	0.0693069	0.854214
	Mtfr2	0.0647134	0.445095
	Map7	-0.330561	2.05299
	Stx7	-0.139654	1.31495
	Pex7	0.0227988	0.144679
	Ifngr1	0.268647	2.60729
	Cfap54	-0.268715	2.07357
	Cdk17	0.0117322	0.0997214
	Snrpf	0.0338369	0.208777
	Usp44	0.322384	0.843089
	Fgd6	0.0114163	0.0511167
	Ndufa12	0.0658916	0.497924
	Tmcc3	-0.168865	0.504196
	Cep83	-0.0180212	0.171441
	Socs2	0.371756	3.02231
	Nudt4	0.142537	1.94842
	Tcp11l2	0.430812	1.53291
	Cry1	-0.0350284	0.261362
	Btbd11	0.837843	2.51847
	Hsp90b1	-0.044447	0.319045
	Washc3	0.18582	2.4503
	Dram1	0.239888	0.44536
	Sirt1	0.089865	1.18779
	Herc4	0.00515381	0.0420776
	Hnrnph3	-0.103427	1.04485
	Rufy2	-0.0316042	0.145758
	Ccar1	-0.0803676	0.999722
	Ddx21	0.0257425	0.263337
	Ddx50	-0.0130177	0.115743
	Srgn	-0.0412374	0.340328
	Vps26a	0.0437339	0.35238
	Supv3l1	-0.163996	1.96545
	Fam241b	-0.256511	0.358187
	Aifm2	-0.183305	0.984275
	Tysnd1	-0.0762007	0.411036
	Sar1a	0.0441208	0.566582
	Ppa1	-0.021889	0.140652
	Eif4ebp2	0.056927	0.65794
	Pald1	-0.713191	2.22538
	Sgpl1	-0.0869089	0.887871
	Unc5b	-0.0150121	0.0534399
	Slc29a3	-0.116475	1.02979
	Vsir	-0.0418492	0.286383
	Lrig3	-0.132472	0.106084
	Anapc16	0.0388445	0.365552
	Ddit4	-0.0441055	0.246219
	Dnajb12	-0.0711326	0.699939
	Micu1	0.0751155	0.811215
	Cand1	0.0217489	0.201215
	Tbk1	-0.13911	2.36306
	Pno1	-0.0497753	0.323677
	Plek	-0.047607	0.433349
	Usp15	-0.0371714	0.397185
	Vps54	0.0438538	0.290188
	Tbc1d15	0.169943	2.10016
	Pcsk4	0.0718412	0.259151
	Rab21	-0.0311105	0.310343
	2310011J03Rik	0.0158727	0.0985321
	Peli1	0.100139	0.901756
	Thap2	-0.0420623	0.189733
	Slc1a4	-0.248645	1.20453
	Dock2	-0.0017172	0.0166089
	Rab1a	-0.0053929	0.038271
	Actr2	-0.0132565	0.106172
	Ndufs7	-0.0787388	0.567163
	Pwwp3a	-0.161814	1.58118
	Uqcr11	0.0458097	0.236847
	Cnot2	-0.0062189	0.0584158
	Tcf3	0.0983602	0.859058
	Frs2	0.0331034	0.269813
	Yeats4	0.0187946	0.118713
	Grb10	-0.635133	1.47204
	Adora2a	0.143935	0.522312
	Snrpd3	0.0609633	0.605268
	Ddc	0.101895	0.112546
	Cpm	0.182878	0.560048
	Mdm2	-0.0287483	0.194305
	E2f7	0.139582	1.23306
	Csrp2	-0.0109353	0.0271626
	Osbpl8	0.115869	1.49009
	Mknk2	0.0482873	0.465398
	Spata48	-0.0846372	0.18332
	Zpbp	0.0524191	0.101334
	Cabin1	-0.13031	2.25958
	Ap3d1	-0.118799	1.81521
	Phlda1	-0.479616	3.06727
	Sf3a2	0.064814	0.590599
	Mdm1	0.0437133	0.232653
	Timm13	-0.0101064	0.0451956
	Vps13d	-0.0281577	0.174392
	Llph	-0.0200982	0.117897
	Tmbim4	-0.0632648	0.517084
	Helb	0.0129585	0.0811174
	Prmt2	-0.245056	1.67439
	Dip2a	-0.340475	3.11958
	Hmg20b	-0.0182001	0.0930448
	4930404N11Rik	-0.587383	0.998857
	Fzr1	0.0135494	0.10389
	Ncln	-0.072592	0.786071
	Col6a2	0.534033	1.86628
	Hcfc2	-0.115686	1.2215
	Nfyb	-0.0061534	0.047587
	Txnrd1	0.0538018	0.685486
	Glt8d2	-0.226991	0.203947
	Ppm1m	0.163447	0.991977
	D10Wsu102e	0.0554711	0.520635
	Aldh1l2	-0.71177	1.55037
	Wdr82	0.123	1.11372
	Glyctk	-0.154102	0.732491
	Pofut2	-0.189883	2.67685
	Slc36a1	-0.0195242	0.107982
	Adarb1	-0.0732789	0.181633
	Appl2	-0.184101	1.06477
	Sumo3	0.0681896	0.748162
	Hint1	0.129001	1.14965
	Lyrm7	0.0918962	0.286014
	Fbxw11	-0.0126053	0.105257
	Stk10	0.165095	2.11172
	Papolg	-0.0655411	0.716858
	Rel	-0.0444125	0.319733
	Pfkl	-0.0860915	0.918053
	Pus10	0.00123195	0.00851179
	Pex13	0.0306342	0.204896
	Cfap410	0.301005	1.01857
	Mpg	-0.114193	0.748681
	Ahsa2	-0.153528	2.20793
	Nprl3	-0.108866	0.846993
	Xpo1	0.107168	1.82956
	Nsg2	0.722394	2.37416
	Cpeb4	-0.322122	3.26465
	Stc2	0.288872	1.58521
	Asb3	0.108974	0.631988
	Cdc34	0.038107	0.222081
	Tpgs1	0.157662	0.597209
	Chac2	0.0860475	0.252242
	Erlec1	0.0176484	0.122582
	Sptbn1	-0.0170165	0.127986
	Wdpcp	0.349611	0.94067
	Mdh1	0.110218	1.95808
	Ccng1	-0.0392559	0.391614
	Nudcd2	0.0446628	0.366049
	Polrmt	-0.0407893	0.283273
	Hmmr	0.0705602	0.81902
	Hcn2	0.105901	0.181846
	Acsl6	1.54399	1.7797
	Cyfip2	-0.0533028	0.731148
	Mgat1	-0.0196396	0.161866
	Ppp2ca	0.0564144	0.643727
	Hnrnpab	0.00972044	0.0714921
	Phykpl	-0.224229	2.03245
	Hspa4	-0.0445723	0.467452
	Cnot6	0.0205359	0.207123
	Mapk9	-0.0833919	0.96192
	Canx	-0.0021843	0.0168634
	Rack1	0.0778626	0.685847
	Rasgef1c	-0.0150107	0.00839708
	Rufy1	0.0795025	0.452826
	Rnf130	-0.12472	0.647447
	Rad50	0.00789956	0.0601702
	Mrnip	0.11515	0.315801
	Clk4	0.0566981	0.315454
	Sar1b	0.097496	0.905637
	Jade2	-0.0991489	0.599654
	Cdkl3	-0.314083	2.20173
	Ube2b	0.0968838	0.989294
	Cdkn2aipnl	0.0654147	0.732129
	Kremen1	0.0953608	0.804765
	Itk	0.00752626	0.0665652
	Nefh	0.0919803	1.02067
	Med7	-0.0622034	0.485424
	Havcr2	-0.485708	3.49312
	Tnip1	-0.0946818	1.03747
	Fam71b	-0.0770156	0.552569
	Vdac1	0.0239441	0.264939
	Upp1	-0.481115	1.93364
	Slu7	0.172604	2.94857
	Ascc2	-0.0498705	0.538288
	Hus1	-0.0195028	0.140894
	Pttg1	-0.0302445	0.14884
	Hormad2	0.233035	0.308451
	Zfp607a	-0.149065	0.732725
	Tns3	-0.381917	0.689065
	Btg2	-0.0329481	0.20699
	Castor1	0.371007	2.11835
	Pes1	0.118148	1.77837
	Tcn2	-0.171617	0.604531
	Myo1g	-0.0234652	0.24954
	Smtn	0.184937	0.673821
	Arf5	0.0800613	0.700435
	2310033P09Rik	-0.0811704	0.447057
	Guk1	-0.0126829	0.0544727
	Rnf185	0.113139	0.912427
	Limk2	-0.0960655	0.934723
	Patz1	0.0914641	0.601604
	Eif4enif1	0.0189388	0.220649
	Trim11	-0.184726	1.7479
	Ogdh	-0.122683	1.9014
	Drg1	0.0366765	0.278777
	Rtn4	-0.038116	0.373545
	Mtif2	0.0154355	0.102451
	Rps27a	0.0760094	0.753246
	Cfap36	0.0009423	0.00503189
	Ppp4r3b	0.0141687	0.154832
	Pnpt1	0.0045148	0.0348914
	Pold2	0.105482	1.15415
	Zkscan17	0.00584582	0.039124
	Polm	-0.225706	2.67778
	Dbnl	0.0783342	0.855229
	Mrps24	0.0943925	0.669333
	Ccdc117	0.536709	4.13107
	Dynll2	0.0268821	0.276286
	Xbp1	0.025761	0.223168
	Supt4a	0.194973	2.58334
	2810021J22Rik	-0.256813	1.80119
	Ska2	0.198058	2.36971
	Prr11	0.0439874	0.32895
	Smg8	0.00707442	0.0480133
	Rnf187	0.0190738	0.155823
	Tubd1	-0.222979	1.0229
	Mrpl22	0.152849	1.46532
	Cnot8	0.116362	1.9491
	Rps6kb1	0.00492449	0.0422144
	Sap30l	0.0510195	0.28614
	Galnt10	-0.385663	3.1438
	Rnft1	-0.120563	1.02805
	Mfap3	-0.156416	2.44396
	Fam114a2	-0.0272518	0.236495
	Ppm1d	0.0646072	0.522111
	Znhit3	-0.0311042	0.121111
	Myo19	-0.323424	3.97665
	Prpsap2	-0.0137134	0.0877065
	Ggnbp2	0.105272	1.5105
	Acaca	-0.0738028	0.586955
	Shmt1	0.0243451	0.225563
	Llgl1	0.116069	1.17912
	Drg2	-0.0057678	0.0438052
	Srebf1	-0.0810634	0.720264
	Tom1l1	0.248223	0.260284
	Cox11	-0.0270386	0.112545
	Stxbp4	-0.051172	0.0950818
	Bzw2	0.118769	1.67278
	Elac2	-0.0807154	1.26736
	Pctp	-0.0330815	0.17674
	Polr1f	0.102389	0.958907
	Atxn7l1	-0.156896	1.20049
	Sypl	-0.0906556	1.02858
	Pdia6	-0.0832531	0.743432
	Nampt	0.237038	3.8869
	Pik3cg	0.026009	0.279904
	Nbas	-0.232324	3.47792
	Tspan13	0.195722	2.19049
	Rock2	-0.0198693	0.20542
	Laptm4a	0.0437786	0.388981
	Cyria	0.28479	2.31205
	Snx13	-0.135724	1.14884
	Sdc1	0.0750881	0.133501
	Lpin1	0.0418674	0.25596
	Pum2	0.0797913	1.30507
	Nrcam	-0.0805698	0.145361
	Rgs9	0.00972317	0.0131795
	Trib2	0.444243	1.23196
	Arsg	-0.198928	0.371088
	Hs1bp3	0.109656	0.348696
	Lratd1	1.44873	2.00812
	Smc6	0.113348	1.76549
	Amz2	0.321815	3.00904
	Gna13	0.104504	1.86817
	Prkar1a	0.0666161	1.14788
	Fam20a	-0.40295	4.06464
	Rdh14	0.261998	1.75011
	Map2k6	0.234598	0.886421
	Trappc12	0.0230686	0.154144
	Adi1	0.160852	1.58078
	Rnaseh1	-0.121891	1.26262
	Ubxn2a	-0.0955768	1.47006
	Cmpk2	0.258624	1.22901
	Pfn4	-0.324384	0.436089
	Itsn2	-0.0316313	0.413123
	Rsad2	-0.0426836	0.0885636
	Rnf144a	1.11294	1.47701
	Id2	-0.247735	1.49909
	Mboat2	0.241053	0.723192
	Ncoa1	0.089366	0.648043
	Dus4l	-0.112531	0.831041
	Rrm2	0.0470421	0.439271
	Bcap29	-0.0017256	0.0118022
	Cenpo	0.0120638	0.0656419
	Klf11	0.287381	1.63044
	Adcy3	-0.0465415	0.315818
	Grhl1	-0.120607	0.235409
	Dnajc27	0.335244	1.83996
	Efr3b	0.674957	1.32076
	Cbll1	0.0408055	0.293883
	Dnmt3a	-0.182661	2.6623
	Dld	0.0873932	1.21972
	Kif3c	0.130605	0.704171
	Sh3yl1	0.0377316	0.0521291
	Rab10	0.00659345	0.0590591
	Ddx52	0.0404389	0.442212
	Taf15	0.0146486	0.136901
	Cdc27	0.00422539	0.0387817
	Itgb3	-0.418834	2.63779
	Mettl2	0.112332	1.05643
	Nle1	-0.0149802	0.0689976
	Tlk2	0.020852	0.159812
	Rffl	0.194331	0.975011
	Lig3	-0.0873546	1.20323
	Map3k3	0.031458	0.233252
	Ccl1	-0.209793	0.147169
	Ddx42	0.00947307	0.0949324
	Ftsj3	-0.0405588	0.51264
	Rnf135	-0.556346	3.47156
	Psmc5	-0.0305649	0.227062
	Tcam1	0.797573	2.24991
	Ern1	-0.4634	4.92737
	Nf1	0.0166649	0.0737336
	Pecam1	0.0899041	0.389154
	Polg2	-0.0234698	0.0838217
	Ddx5	0.00282216	0.029841
	Psmd12	-0.0079058	0.0537244
	Helz	-0.0586229	0.634159
	Rab37	0.241503	3.03525
	Slc9a3r1	0.0976121	1.06635
	Nt5c	0.0194791	0.104977
	Jpt1	0.0947866	1.11393
	Sumo2	0.0713758	0.446355
	Nup85	0.0266013	0.25402
	Gga3	-0.110679	0.975152
	Cluh	-0.0785624	1.05129
	Mif4gd	-0.116975	1.0048
	Slc25a19	-0.0597004	0.434187
	Pafah1b1	0.0356489	0.420586
	Tmem94	-0.0505693	0.389572
	Recql5	-0.147844	0.841505
	Sap30bp	0.0693628	0.744977
	Itgb4	-0.0308138	0.0210206
	Galk1	0.0333344	0.148167
	Unk	-0.0721793	0.424001
	Mrpl38	-0.112804	0.936363
	Fbf1	-0.133617	0.922549
	Acox1	-0.307798	2.54558
	Ten1	0.0545071	0.368683
	Srp68	-0.103638	1.56877
	Tsen54	0.0991009	0.711922
	Llgl2	-0.187923	1.14088
	Ncbp3	0.115248	1.8918
	Camkk1	0.23706	1.00656
	P2rx1	0.103444	0.0659166
	Atp2a3	0.0977467	1.13163
	Ankfy1	-0.0121092	0.117694
	Exoc7	0.0839545	0.82453
	Ube2g1	-0.0373347	0.358718
	Spns3	-1.64092	3.50073
	Med31	-0.028296	0.0995972
	Ube2o	-0.1433	1.82087
	Txndc17	-0.0270733	0.219629
	Rhbdf2	-0.356887	3.84306
	Pimreg	0.193399	1.99292
	Wscd1	-0.0156803	0.0295175
	Snhg16	-0.0952338	0.542442
	Rabep1	-0.093502	1.0288
	Mfsd11	-0.102976	0.367325
	Kif1c	-0.0880775	1.25727
	Sec14l1	-0.0519402	0.269214
	Mink1	-0.247734	3.35922
	Pld2	-0.441668	1.78205
	0610010K14Rik	-0.335783	0.695291
	Eral1	0.0574158	0.550831
	Dhrs13	-0.0099681	0.0529452
	Blmh	0.122357	1.85065
	Cpd	-0.349604	1.31588
	Timm22	0.0847683	0.714366
	Nxn	-0.0571026	0.355551
	Rflnb	0.417208	0.614303
	Rph3al	-0.0866751	0.218703
	Ywhae	0.0933001	1.27901
	Prpf8	-0.0876676	1.33689
	Nme2	0.747727	1.24786
	Spag9	-0.0923642	1.42575
	Luc7l3	0.00098913	0.0071461
	Ankrd40	-0.0101533	0.0948387
	Abcc3	-0.647707	2.30377
	Xylt2	-0.030923	0.157822
	Lrrc59	-0.0251843	0.166116
	Tac4	0.0387322	0.0850791
	Slc35b1	-0.10359	1.07168
	Snx11	-0.101039	0.898269
	Scrn2	-0.080558	0.328353
	Cacnb1	0.131568	0.201404
	Fbxl20	0.253575	0.990772
	Dlg4	0.068729	0.460472
	Dvl2	0.0354942	0.230274
	Nr1d1	0.256521	0.325684
	Gucy2e	-0.0442415	0.0832516
	Alox8	0.134152	0.151071
	Per1	-0.10278	0.796385
	Vamp2	-0.155014	0.99826
	Tmem107	0.225222	1.30898
	Aurkb	0.107028	1.11952
	Ctc1	-0.0337608	0.226001
	Pfas	-0.116491	1.22745
	Myh10	0.109672	0.10895
	Pik3r5	0.0288427	0.138663
	Stx8	-0.088572	0.713721
	Adprm	0.0555163	0.362955
	Top2a	0.151327	1.9648
	Acly	-0.0175002	0.158474
	Kat2a	-0.0064875	0.0600405
	Stat5b	0.112881	1.39127
	Tmem101	0.0451354	0.243919
	Lsm12	0.0517916	0.557816
	Ubtf	0.0278011	0.254048
	Ccdc43	-0.0288914	0.222344
	Eftud2	-0.0168757	0.158415
	Dcakd	-0.0444241	0.27941
	Nmt1	-0.0126174	0.0960408
	Map3k14	0.023956	0.170643
	Gosr2	0.0363885	0.439079
	Klhl28	-0.10738	0.89101
	Fkbp3	0.0801381	1.04957
	Scfd1	-0.0811689	1.06552
	Coch	-0.79359	2.20554
	Strn3	-0.0661798	0.64745
	Ap4s1	-0.0796486	0.455151
[truncated: 12,326 more rows]

## Sheet: 5B
	Gene names	IL2_dKO_v_WT_log2FC_all_mRNA	IL2_dKO_v_WT_-log10.p.val_all_mRNA	IL2_dKO_v_WT_-log10.p.val_highlighted_mRNA		dotted line qvalue = 0.05 at unadjusted p-value = 2.06
	Gnai3	0.0288161	0.350711
	Cdc45	-0.0212935	0.174179
	Narf	-0.0533927	0.214071
	Cav2	-0.211597	0.476351
	Klf6	0.152583	2.03379
	Scmh1	-0.0879753	0.514983
	Cox5a	0.0735354	0.754835
	Xpo6	0.017157	0.204549
	Tfe3	-0.0547429	0.334589
	Axin2	0.319863	1.27619
	Brat1	-0.130666	0.978334
	Gna12	-0.0890051	0.605697
	Igsf5	-0.339874	1.0922
	Pih1d2	0.0898814	0.125478
	Dlat	-0.162375	2.091
	Sdhd	0.0843173	0.730263
	Ccnd2	0.0133814	0.120184
	Gpr107	-0.152722	1.57525
	Drp2	-0.617408	1.80395
	Tspan32	0.738437	2.08478
	Lhx2	1.03452	2.16926
	Mid2	-0.699602	0.89539
	Trim25	-0.0611916	0.680563
	Dgke	0.0429605	0.292644
	Scpep1	0.203651	3.35427
	Mnt	0.0595806	0.42285
	Itgb2	-0.137017	2.11239
	Hddc2	0.0583532	0.337366
	Pemt	-0.143646	0.590878
	Cdh1	-0.238563	1.3566
	Ckmt1	-0.190039	0.224579
	NA	0.373699	0.617655
	Comt	-0.0733798	0.694639
	Rtca	0.016823	0.123935
	Dbt	-0.234791	3.05237
	Dazap2	0.081394	1.30061
	Mcts1	0.022338	0.161908
	Rnf17	-0.577871	0.868376
	Trappc10	0.0146815	0.12965
	Ccm2	0.0127284	0.100679
	Tbrg4	-0.0602984	0.658324
	Mx1	-0.422899	3.17582
	Ndufa9	0.0506705	0.505966
	Lck	0.078982	1.33441
	Galnt1	-0.0479862	0.524703
	Mkrn2	0.0522662	0.434519
	Pparg	-0.836532	3.59183
	Raf1	0.0302601	0.307274
	Septin1	0.0725089	0.939117
	Pdgfb	-0.0200618	0.0114285
	Acvrl1	-1.02899	3.21701
	Tamalin	-0.105883	0.410896
	Acvr1b	-0.157806	1.52626
	Tom1l2	-0.0559777	0.227828
	Zfp385a	0.0449799	0.0873669
	Itga5	0.154337	0.538983
	Wdr77	-0.0656868	0.567491
	Adora3	-0.628416	3.0008
	Atp5pb	0.059923	0.531711
	Hnrnpd	0.0863138	1.34521
	Dynlt1c	-0.109632	0.197215
	C1d	0.103013	1.1372
	Gm2a	0.375641	4.59973
	Krit1	-0.111226	1.05327
	Clcn4	-0.0355841	0.341494
	Sema4f	0.495095	2.8389
	Hk2	-0.241789	1.87133
	Myo18a	-0.115581	1.48174
	Haao	-0.243108	3.07581
	Cd52	0.0636302	0.771091
	Abhd15	0.0386021	0.111998
	Kat2b	-0.0072224	0.0357246
	Rab5b	-0.13441	1.21287
	Icosl	-0.127069	1.14589
	Spg7	-0.0920604	1.02761
	Rpl13	0.0714807	0.631982
	Chmp1a	-0.0118186	0.100218
	Rpa1	0.169973	3.21538
	Serpinf1	0.0158967	0.0197393
	Tubgcp3	0.032661	0.37465
	Polr3d	-0.12878	1.13318
	Tcf7	1.55102	3.88698
	Ddx3x	0.0133772	0.117966
	Il12rb1	-0.206408	1.65785
	Usp32	0.00159182	0.00992714
	Txnrd3	-0.0364315	0.182282
	Fasl	0.0345636	0.207133
	Zfp512b	-0.169218	1.48388
	Dnajc5	-0.0588175	0.844498
	Tpd52l2	0.0933365	1.00991
	Fmr1	0.0796218	0.955396
	Pxmp4	0.0888881	0.498415
	Dlg3	0.251665	0.746276
	Gnb1l	0.0451372	0.163173
	Mmp11	0.100347	0.1202
	Smarcb1	-0.0179568	0.18416
	Hip1r	-0.0857314	0.969285
	Nsun5	-0.132104	1.19261
	Top1mt	-0.157491	1.21598
	Slc7a7	-0.142236	0.117861
	Oxa1l	-0.0373692	0.300747
	Heatr6	-0.0581239	0.391513
	Ccl3	0.215527	0.392368
	Ilf2	0.0551403	0.618473
	Chtop	0.11983	2.44174
	Snapin	-0.0135855	0.0854231
	S100a4	0.0587619	0.117614
	S100a5	0.178596	0.261101
	S100a6	-0.0017295	0.00713775
	Icam2	0.330828	2.4777
	Mapk7	-0.0265698	0.139862
	Epn2	0.0504308	0.0636307
	B9d1	-0.157348	0.158094
	Sec24b	0.120018	0.909467
	N4bp3	-0.0605399	0.350185
	Rmnd5b	-0.229919	2.95734
	Nhp2	0.042977	0.228749
	Vps9d1	-0.0358289	0.135821
	Zfp276	-0.246151	2.25559
	Mfsd10	0.0431267	0.358166
	Luzp1	0.0258456	0.151096
	Kctd10	0.0538651	0.619506
	Poldip2	0.0422025	0.432287
	Ift20	-0.0035994	0.0169838
	Col6a1	-0.308349	0.434035
	Pcbp3	0.276999	0.759533
	Lgals9	0.279675	3.89444
	Araf	-0.164102	2.59935
	Cfp	-0.896456	5.82232
	Uxt	0.0729927	0.500297
	Cnnm3	0.0404193	0.170345
	Lman2l	-0.225255	1.25572
	Mcm3ap	-0.0484813	0.514527
	Pcnt	0.0357083	0.256726
	Mxd1	-0.166314	0.911871
	Gmcl1	-0.0317919	0.254875
	Snrnp27	-0.0333451	0.186602
	Oas1c	-0.121468	0.511332
	Ocrl	-0.16972	1.55538
	Calm1	0.0629427	0.537374
	Agpat3	-0.0487657	0.655947
	Sema6b	-0.136634	0.302695
	Uhrf1	0.100982	1.12934
	Dpp9	-0.0581763	0.646125
	Lsr	1.78791	3.55647
	Gramd1a	-0.247726	2.52885
	Ckb	0.223349	0.833732
	Sp1	0.0407705	0.539859
	Itgb7	0.264657	3.53668
	Myg1	0.0545303	0.506133
	Rarg	-0.0686999	0.161275
	Pfdn5	0.10074	0.696273
	Efnb2	-0.643512	2.0996
	Rrp15	-0.0506542	0.354798
	Rnd2	-0.314087	0.548461
	Srr	0.252095	1.56153
	Acp5	-0.0987266	0.719505
	Fbxo9	-0.205119	2.6295
	Vps50	-0.147151	1.13394
	Hars	-0.0677459	0.77488
	Zmat2	0.0670277	0.781785
	Ube2c	0.0908779	0.875425
	Smg5	-0.05941	0.883299
	Cct3	0.0735687	0.710016
	Glmp	-0.0629615	0.545233
	Mef2d	0.0349713	0.268933
	Tmem79	0.102923	0.255147
	Snd1	-0.0613839	0.706194
	Col18a1	-1.11172	1.83407
	Slc19a1	0.0147102	0.105275
	Kpnb1	0.0408577	0.505268
	Npepps	-0.010851	0.08592
	Tbx21	0.372213	3.23688
	Mrpl10	-0.0323509	0.233533
	Cyp51	0.00012226	0.00051568
	Tcf25	-0.0400453	0.485554
	Tubb6	-0.362275	1.8778
	Def8	-0.0313665	0.259471
	Itga3	-0.887504	4.25781
	Foxm1	0.164714	1.43335
	Itfg2	0.0317161	0.185179
	Tulp3	0.0441673	0.147256
	Gtf2h4	0.0390949	0.289877
	Tubb5	0.123563	1.93019
	Ell2	-0.1507	1.38801
	Jup	-0.94987	3.85411
	Klhl10	-0.496729	0.566881
	Nom1	0.0203235	0.183918
	Ergic1	-0.0501603	0.646061
	Acap1	-0.176764	2.54566
	Ifrd1	0.0634277	0.480075
	Stk38l	0.0423473	0.151123
	Brpf1	-0.0473306	0.58475
	Akr1b3	0.0506482	0.470686
	Gstt1	-0.622458	0.903471
	Gstt3	0.200951	0.325582
	Ddt	-0.0697702	0.225611
	Ddx18	0.0287337	0.249513
	Ubl3	0.0186063	0.143078
	Gramd3	-0.0824346	0.687643
	Eef1e1	0.0249089	0.157762
	Akt1	-0.0115606	0.098144
	Il16	-0.0013078	0.00803532
	Tcirg1	-0.172617	1.19129
	Naglu	0.0138436	0.0514076
	Coasy	-0.0783194	0.783289
	Smo	0.0455315	0.082104
	Crnkl1	0.140996	2.57174
	Chordc1	0.0631283	0.933547
	Rtcb	0.0363427	0.406027
	Pwp1	0.0263786	0.234061
	Fbxo7	0.109318	0.79415
	Capns1	-0.0101515	0.0875876
	Clpb	0.0547475	0.454703
	Septin7	0.104678	1.56246
	Zdhhc4	-0.0211705	0.169575
	Rac1	0.0826998	1.39822
	Nup214	-0.0447295	0.507822
	Aif1l	0.32798	0.861465
	Cpa3	-0.877409	0.869145
	Ugp2	-0.0470743	0.42801
	Trmt1	-0.0738148	0.68671
	Nacc1	-0.0157344	0.165268
	Nfix	0.647644	1.7264
	Slc1a5	-0.238279	4.33759
	Uba1	-0.0671985	0.798946
	Siae	0.0908595	0.439766
	Fam50a	-0.0415714	0.32592
	Emd	0.102657	1.44867
	Taco1	0.0675484	0.377786
	Sipa1l2	-0.378684	3.21508
	Ap4e1	-0.0673544	0.705464
	Blvra	0.035661	0.227927
	Idh3g	0.106608	1.62892
	Ssr4	0.0104894	0.0594741
	Bcap31	0.0708466	0.753499
	Fam98a	-0.0583074	0.57127
	Kmt2a	-0.103554	0.826313
	Ift46	0.0687721	0.488066
	Tmem25	0.0985146	0.134747
	Cd3g	0.130946	1.79471
	Trappc6a	0.108872	0.610101
	Supt6	-0.0882934	1.60977
	Spag5	-0.0150891	0.105696
	Unc119	-0.216177	2.14813
	Sdf2	-0.0488125	0.357136
	Ccne1	0.0570985	0.463394
	Hsf2bp	-0.732254	1.33231
	Bbc3	0.453728	1.54439
	Psmc3	0.00381904	0.0262978
	Acp2	-0.0118794	0.0485324
	Rapsn	0.138382	0.278036
	Slc39a13	-0.2949	1.45146
	Celf2	0.0168384	0.158242
	Nr1h3	0.243709	0.206045
	Ddb2	0.0262224	0.0966935
	Sf3a1	0.0237072	0.256475
	Stat6	-0.0910576	0.915689
	Napsa	-0.0845437	0.47318
	Vrk3	0.0907349	0.857151
	Smg9	-0.0623004	0.546275
	Paxip1	0.0198756	0.176926
	Rmnd5a	0.211258	2.57559
	Mov10	0.0327212	0.201992
	Ppm1j	-0.140583	1.48425
	Rhoc	-0.246061	1.58469
	Ppard	-0.325337	3.35178
	Def6	-0.0657936	0.475721
	Metrn	0.199276	1.15518
	Lmf1	-0.175598	1.2164
	Ciao3	-0.0896658	0.625596
	Angptl4	0.0854626	0.622047
	Dbf4	0.0384079	0.391806
	Daxx	-0.0381115	0.372779
	Cd320	-0.107144	0.413089
	Ipo4	-0.253085	2.87842
	Tm9sf1	-0.0390159	0.421431
	Irf9	-0.117329	1.24509
	Gmpr2	0.0047198	0.0311634
	Mdp1	-0.0028241	0.019257
	Dhrs1	0.102654	1.02278
	Tmem161a	-0.0829248	0.754928
	Armc6	-0.0089848	0.0412768
	Borcs8	0.0922318	0.684868
	Slc25a42	-0.234365	0.825345
	Snx9	-0.0332384	0.221924
	Ranbp3	-0.0463616	0.453507
	Ndufa11	-0.0046302	0.0211864
	Nr2f6	0.086114	0.345711
	Use1	0.0908397	0.73587
	Ocel1	-0.17634	1.08687
	Dyrk1b	0.154568	0.341921
	Braf	0.0157702	0.111396
	Ndufb2	-0.037483	0.111816
	Hltf	-0.0046696	0.032876
	Prpf6	-0.0137791	0.123991
	Rgs19	-0.0644438	0.85269
	Snrpd1	0.053529	0.358043
	Tchp	-0.0637345	0.344613
	Tiam1	-0.0363906	0.128653
	Tsc2	-0.0968361	1.16628
	Puf60	0.0669802	0.83013
	Golga2	-0.215327	3.18669
	Uck1	0.11154	1.02565
	Scin	-1.17683	3.76473
	Ikzf4	-0.0938275	0.821066
	Mien1	0.0561769	0.328195
	Axl	-0.0333641	0.19183
	Tgfb1	-0.207244	2.23836
	Ccdc97	-0.046049	0.357438
	Zfp40	-0.101429	0.461772
	Akap8l	-0.0493511	0.25483
	Pdcd2l	0.0155095	0.0641494
	Gtf2f1	-0.031471	0.31498
	Clpp	-0.0504558	0.303617
	Alkbh7	-0.0019894	0.00460163
	Dennd1c	-0.268923	2.20208
	Med6	0.0706676	0.446765
	Lcp2	-0.0333466	0.341004
	Cse1l	0.0238602	0.18942
	Naa20	0.086962	0.823605
	Prkra	-0.0505669	0.161065
	Fkbp7	0.769657	2.95611
	Plekha3	-0.0619154	0.568118
	Ykt6	-0.125589	1.64166
	Baz1b	0.0507679	0.604362
	Pex6	-0.0851927	0.488328
	Mrpl2	0.0720644	0.483971
	Mea1	-0.0134706	0.0749768
	Grin2d	-0.239962	0.292502
	Kdelr1	0.0406194	0.437225
	Tmem143	-0.0508164	0.179318
	Ggct	0.0426513	0.272409
	Jag2	0.0876575	0.230323
	Btbd6	-0.102694	0.408715
	Nudt14	0.301171	2.02133
	Epdr1	-0.626536	2.04505
	Flii	-0.010793	0.117463
	Top3a	-0.0359755	0.326685
	Atg4d	-0.0590536	0.39176
	Qtrt1	-0.115244	1.05594
	Hdgfl2	0.0044599	0.0281483
	Chaf1a	0.0615008	0.798559
	Adprh	0.103353	1.11433
	Tmem39a	-0.113898	1.07289
	Timmdc1	-0.0510456	0.316442
	Pla1a	-0.414316	0.379297
	Mcm2	0.121254	1.52163
	Tpra1	-0.0146016	0.0531589
	Nab1	-0.0200142	0.124223
	Adgre5	0.489429	3.03027
	Il17ra	0.00332814	0.0223685
	Arrdc2	-0.249165	2.10393
	Map2k7	0.0127678	0.0882221
	Timm44	0.0401989	0.450525
	Ap2a2	-0.12405	2.35114
	Pnkp	-0.0431959	0.321927
	Med25	-0.0625514	0.585284
	Clptm1	-0.0037769	0.0314548
	Relb	0.118446	0.675761
	Tomm40	-0.0039398	0.025952
	Apoe	-0.208161	0.754706
	Hbp1	0.412317	2.05521
	Prkar2b	0.193715	1.28949
	Cdkn1b	0.195478	1.08414
	Klf4	1.30386	2.78103
	Ap1m1	0.108305	1.56885
	Rab8a	0.0436068	0.459828
	Hmgn2	0.260652	3.9145
	Fam32a	0.1379	1.23329
	Stard3nl	0.0716144	0.305211
	Stk11	-0.0604703	0.566515
	Atp5d	-0.024782	0.1737
	Ppp5c	-0.0916616	1.07517
	Cdk12	-0.043538	0.533017
	Lipe	-0.156528	0.486412
	Pafah1b2	0.0316218	0.355768
	Cnot11	0.101402	1.52588
	Slc2a3	-0.171939	1.18147
	Foxj2	-0.126043	0.969488
	Sri	0.0331647	0.360799
	Dgcr2	-0.0907185	1.01647
	Irf3	-0.12896	1.45944
	Bcl2l12	-0.0720409	0.385953
	Zfp959	0.0101685	0.0421494
	Mpnd	0.153738	1.49313
	Sh3gl1	-0.0359647	0.368328
	Ebi3	-0.262966	0.844237
	Yju2	-0.0566588	0.410862
	Ranbp2	-0.0097317	0.0778415
	Grk5	-0.12478	0.549097
	Dvl3	-0.0896273	0.789641
	Abcf3	-0.0650592	0.44386
	Eif2b5	-0.0027118	0.0209425
	Cyth2	-0.0006946	0.00297244
	Sult2b1	-0.573346	2.89299
	Plag1	-0.561795	1.67432
	Mrpl4	-0.0226784	0.192342
	Keap1	0.00868416	0.0570173
	Ap1m2	-0.334645	0.585509
	Glg1	-0.0236716	0.189715
	Btbd2	0.139481	0.627406
	Csnk1g2	-0.0018302	0.0130375
	Abhd17a	0.0687174	0.410608
	Mob3a	-0.0316442	0.374016
	Cacnb3	0.609531	2.87195
	Fkbp11	-0.230679	0.477743
	Ddx23	-0.0341657	0.436496
	Pld3	-0.217549	2.74757
	Grik5	0.0197697	0.0344667
	Rabac1	0.0479574	0.225636
	Etv3	-0.0659324	0.59401
	Prkcsh	-0.0599459	0.645509
	Fcgrt	0.224476	0.212088
	Nosip	-0.0020591	0.0153744
	Pih1d1	0.146066	1.5273
	Rps11	0.0916083	1.05587
	Supt5	-0.0103508	0.0946404
	Paf1	-0.0458623	0.561715
	Timm50	-0.0014697	0.00781171
	Med29	-0.0056875	0.0225019
	Ncstn	-0.0442867	0.464235
	Pex19	-0.0202183	0.182375
	Impdh1	-0.166832	2.47145
	Dusp3	-0.184875	1.48799
	Prodh	-0.0502273	0.078159
	Ess2	-0.0380914	0.327324
	Slc25a1	-0.0887043	0.774444
	Dgcr6	-0.107516	0.524511
	Ddr1	0.00964424	0.0240704
	Ier3	-0.5015	4.56704
	Fosb	0.700324	0.998641
	Klc4	0.101854	0.329086
	Ercc1	-0.15571	1.85306
	As3mt	0.390912	0.679845
	Homer3	-0.222975	0.950321
	Crtc1	0.0736161	0.532846
	Rnf215	0.0391643	0.143374
	Sec14l2	-0.0935301	0.0980207
	Aven	0.0468281	0.39597
	Crot	0.0122537	0.091421
	Rps6ka1	-0.159898	2.59384
	Snrnp200	-0.0429381	0.569509
	Ciao1	0.154177	1.23105
	Taf6l	-0.185387	1.10329
	Insig2	-0.0299674	0.137822
	Kpna6	-0.0828765	0.979269
	Man1a	0.0467704	0.413511
	Itpkc	-0.0354227	0.124542
	Coq8b	-0.151021	0.9543
	Brd8	-0.0458806	0.403986
	Kif20a	0.113596	1.42856
	Farsa	-0.0254434	0.252423
	Gcdh	-0.090826	0.890802
	Mast2	-0.0884743	0.959369
	Dnase2a	-0.261034	1.3544
	Rad23a	0.0182481	0.165818
	Calr	-0.113897	1.06854
	Syce2	0.100823	0.759612
	Nfat5	-0.389826	4.67977
	Nob1	0.0285406	0.246712
	Nqo1	0.406979	1.09688
	Ppfia3	-0.491663	1.26949
	Gys1	-0.195883	1.44543
	Ruvbl2	0.0111878	0.0691477
	Bax	0.0792704	0.876491
	Il7r	0.211201	0.934006
	Tfam	0.0364517	0.37487
	Zfp81	0.0756351	0.609862
	Efnb3	-0.450224	0.923262
	Mmd	-0.204067	1.98888
	Fam162a	0.00415249	0.0174463
	Rpl8	0.0772341	0.781421
	Ssbp2	0.435973	3.30884
	Fancl	0.135929	1.33721
	Gstm5	-0.880305	2.25712
	Stat3	-0.0857547	1.27151
	Stat5a	-0.053798	0.691269
	Map3k11	-0.046257	0.405226
	Akt2	-0.0854497	1.0858
	Dnaja3	-0.0893049	1.03831
	Hmox2	-0.0046019	0.0300108
	Cdip1	0.11773	0.625327
	Map3k20	-0.0695921	0.137721
	Cwc15	0.0821565	1.38823
	Dnmt1	0.0583278	0.56411
	Ppan	-0.103749	0.991941
	Trmt10a	0.00682541	0.0390014
	Kifc2	-0.750388	1.05835
	Psap	0.196227	2.8386
	Ikbkg	-0.0145301	0.108992
	Wars2	-0.0695181	0.357359
	Atn1	0.134036	0.364078
	Phb2	0.0352159	0.325321
	Ptpn6	0.5434	5.26394
	Emg1	0.034272	0.280208
	Lpcat3	-0.22781	2.4684
	Atp6v1f	0.0508043	0.309942
	Clcn5	-0.151761	1.43488
	Clcn3	0.0265713	0.207312
	Hif3a	-0.339229	0.506725
	Utp20	-0.143559	1.91425
	Cul3	0.0115996	0.10991
	Large1	-0.0583978	0.141064
	Ddx56	-0.0112277	0.0717682
	Tmed4	-0.123717	1.08342
	Bid	-0.0178807	0.114425
	Ralb	-0.424561	2.62279
	Ppp1cc	0.0961705	1.27558
	Dnajb11	-0.0939094	0.974473
	Tbccd1	-0.202244	1.84384
	Clec11a	0.38543	0.32353
	Zfp324	-0.0350152	0.15061
	Gab2	-0.124031	0.641834
	Coro1c	-0.0214066	0.192467
	Tax1bp1	-0.0084784	0.0660101
	Psg17	-0.436828	0.682102
	Ctse	-0.155501	0.824868
	Ndrg2	0.226055	1.45834
	Mettl17	-0.0175044	0.0562889
	Arhgef40	0.185053	0.27569
	Pnpla6	-0.380664	3.28748
	Mcoln1	-0.0952441	0.446648
	Arhgef18	0.225978	0.981325
	Pkn2	0.0949044	1.33888
	Etfb	-0.0271808	0.0797138
	Nkg7	-0.0687483	0.926389
	Stxbp2	-0.0712331	0.860491
	Chn2	-0.569345	2.18477
	Wwox	0.114389	0.622691
	Slbp	0.138541	2.46068
	Arid3b	-0.143555	0.994549
	Cnn2	0.0089762	0.0736929
	Polr2e	-0.0119291	0.0883125
	Myo9b	-0.138562	2.4439
	Ly9	0.237435	3.38613
	Cd244a	-0.43667	3.02669
	Mtfp1	0.156734	0.491043
	Rab23	0.123638	0.819276
	Rab11a	0.0213976	0.169321
	Eif2b2	-0.0309281	0.259666
	Dlst	0.0578461	0.832468
	Pgf	0.402025	0.648595
	Ulk2	0.00976132	0.052987
	Dgkq	-0.208844	1.35002
	Grap	0.12997	1.69843
	Chmp2b	0.0200012	0.121061
	Plod3	-0.107564	0.729265
	Ap1s1	0.114732	1.27074
	Srpk1	-0.0331801	0.240606
	Lbr	0.157595	2.94115
	Prcc	0.0984299	1.24147
	Rrnad1	-0.228077	1.54246
	Hdgf	0.0502365	0.74119
	Thop1	-0.0791922	0.630122
	Apba3	-0.024025	0.101682
	Matk	0.673171	0.642164
	Pias4	-0.0790319	0.661661
	Map2k1	-0.144105	1.63653
	Sgta	0.033173	0.316217
	Tmem242	0.100941	0.848971
	Dtx2	-0.0991458	0.721454
	Rasa4	-0.27278	1.42511
	Hnrnpa2b1	0.0243022	0.288298
	Ccdc130	-0.261695	1.41827
	Mri1	0.0971136	0.916986
	Prkacb	0.13849	1.68664
	Sgsh	0.100164	0.424814
	Chd5	-0.878629	2.11978
	Cstb	-0.0853377	0.490039
	Sh2b2	-0.278855	0.345954
	Pex5	-0.109861	0.676733
	Jkamp	0.0004213	0.00217732
	Cd44	0.0605247	0.455043
	Eif2ak4	-0.0732442	0.568284
	Wdr1	-0.074854	1.01447
	Slc2a9	0.212573	1.0942
	Ndrg1	0.0531457	0.365219
	4930550C14Rik	-0.247158	0.214057
	Man2b1	-0.0712131	0.964293
	Wdr83	0.0149537	0.0841818
	Prdx2	0.170935	1.69896
	Polr2a	-0.0472676	0.446569
	Senp3	0.0052085	0.0379384
	Plekha8	-0.306936	0.900711
	Spc25	0.127989	1.30541
	Ufd1	-0.0009824	0.00710938
	Zfp287	0.18414	1.29482
	Letm1	-0.0325236	0.327056
	Ubqln1	-0.0317079	0.40609
	Txn2	0.0417297	0.496631
	Crbn	0.0356522	0.216649
	Msh6	0.0564371	0.587867
	Fbxo11	-0.0482286	0.313825
	Tbl2	-0.0831946	0.933694
	Bud23	-0.0404505	0.309743
	Nid1	-0.832016	1.44405
	Mcm5	0.134225	2.07725
	Hmox1	-0.31802	1.45796
	Mprip	0.0492258	0.47712
	Cic	-0.112892	1.51024
	Pafah1b3	0.239023	1.48682
	Il27ra	0.0320559	0.203342
	Prkaca	-0.0023097	0.0168464
	Asf1b	0.200784	2.85015
	Myl10	0.253893	1.55384
	Ddx39a	0.0523834	0.432516
	Dnajb1	0.123409	1.21444
	Usp40	-0.359978	2.17415
	Kbtbd4	-0.0994506	0.897371
	Celf1	0.0354801	0.240935
	Ndufs3	0.0668723	0.559349
	Por	-0.169221	2.05671
	Igf1r	0.745443	1.47155
	Insr	-0.100607	0.473307
	Trim28	0.0836946	1.37432
	Ube2m	-0.0830637	1.10487
	Ctr9	0.00716325	0.0547143
	Eif4g2	-0.0198477	0.201782
	Irag1	-0.163253	0.706158
	Pcyt1a	0.112159	0.95205
	Zfp592	0.0156852	0.0928749
	Psmd4	-0.0030023	0.0253175
	Tmod4	-0.639644	0.608268
	Insrr	-0.512869	2.17689
	Snx6	0.0609445	0.625979
	Mthfd2	-0.0771515	0.823126
	Kit	-0.459354	2.2214
	Tomm40l	0.0129372	0.0793485
	Apoa2	-0.530181	1.1373
	Pan2	-0.073764	0.535129
	Cs	-0.0184099	0.179843
	Bcas2	0.0166853	0.147737
	Sh2d1a	0.223533	1.66023
	Ctcf	0.0787589	1.00665
	Pard6a	0.17075	0.923975
	Tfap4	0.170011	0.685205
	Ranbp1	0.0365924	0.294252
	Cd247	0.00628724	0.0560415
	Rfx5	0.0070795	0.0246783
	Psmb4	0.0620922	0.48928
	Slc30a4	0.110565	1.63958
	Sqor	-0.426431	0.45167
	Bloc1s6	0.0164121	0.120505
	Metap1	-0.0901848	1.28525
	Gpr108	-0.0939453	0.931048
	Tnfsf14	0.0211899	0.070929
	Rsl1d1	0.0381885	0.301275
	Apc	-0.0108934	0.0767201
	Reep5	-0.0969739	1.07792
	Ergic3	0.00571166	0.0447907
	Uqcc1	-0.0628537	0.625166
	Spo11	0.111159	0.185768
	Ncoa2	0.0684982	0.743726
	Nr2c2	0.0267588	0.230958
	Nr2c1	-0.0796873	0.528529
	Smpd4	-0.0257386	0.214987
	Pex1	-0.0160506	0.0911069
	Kctd20	0.105005	1.47241
	Itgae	0.819796	1.67307
	Ctns	-0.250827	1.62107
	Shpk	-0.230148	0.94376
	Tuft1	-0.248304	1.38767
	Rcn1	0.155817	1.73163
	Trap1	0.0989852	1.49742
	Naa60	-0.0622488	0.492393
	1700037C18Rik	-0.0291331	0.0758762
	Ankrd13d	-0.168101	0.484392
	Tpr	0.0100712	0.10499
	Odr4	-0.0143578	0.0967577
	Dhx34	0.0641075	0.311079
	Kptn	-0.0124403	0.0611152
	Napa	-0.0866702	1.39248
	Sra1	-0.0419423	0.284044
	Atp5g1	-0.0559095	0.60437
	Snf8	-0.0818526	0.974245
	Tbcb	-0.0126178	0.0620903
	Inpp5k	0.262394	3.14351
	Crkl	0.0243936	0.266218
	Eps8l1	0.295989	0.140509
	Clint1	-0.0095541	0.0676846
	Prss16	0.0250746	0.0908564
	Cdkal1	0.0213399	0.128773
	Zbtb17	-0.0359277	0.274595
	Mob1b	-0.0933573	1.25567
	Atp6v1b2	-0.0789204	0.796504
	Eps15l1	-0.0231517	0.218613
	Tep1	-0.303039	3.73883
	Ttc5	0.00493773	0.0326064
	Osgep	0.0483502	0.43311
	Aamp	-0.0150028	0.146579
	Tmbim1	-0.148567	1.02132
	Arpc2	0.0258254	0.249816
	Kmt2b	-0.181906	3.03945
	Zbtb32	-0.299399	3.98079
	Upk1a	-0.300566	1.58976
	Tmem147	-0.0779425	0.628373
	Rps9	0.110549	1.09118
	Tfpt	-0.0462972	0.270987
	Susd2	-0.341722	0.498001
	Ggt5	0.107482	0.0983756
	Ggt1	0.157733	0.600977
	Crip2	0.334397	1.14206
	Crip1	0.424985	4.46793
	Cbfa2t3	0.436749	1.60687
	Fbln1	0.269318	0.66899
	Pgrmc1	0.0856005	0.690997
	Gcat	0.12491	0.364542
	Elovl1	-0.1199	1.51959
	Med8	-0.058719	0.550362
	Hyi	-0.397208	1.3914
	Cdc20	0.166436	1.90838
	Pfdn2	0.0213199	0.171666
	Rnf114	-0.0108174	0.111175
	C330007P06Rik	0.049377	0.548106
	Srm	-0.10941	1.2065
	Epha2	-0.12354	0.248608
	Rbm14	-0.118513	1.10372
	Actn3	0.172299	0.488686
	Zdhhc24	-0.302169	1.87887
	Bbs1	0.22491	0.336325
	Ndor1	-0.196885	1.4485
	Nsmf	-0.0598216	0.239733
	Pdk1	0.069751	0.692026
	Ptbp1	-0.0122145	0.118618
	Mvd	-0.214079	1.82464
	Cyba	0.0404903	0.227965
	Stimate	-0.179553	1.4793
	Sfmbt1	0.00888278	0.0696372
	Rundc3a	0.216926	0.423333
	Cdt1	0.103597	0.651365
	Snai3	-0.344051	3.94148
	Aprt	-0.0661605	0.574734
	Gtf2h1	-0.047095	0.450652
	Hfe	0.358492	0.463059
	Abhd1	-0.617482	1.80849
	Slc5a6	-0.0154869	0.0589328
	Aplp1	-0.342687	1.11343
	Qrich1	0.0345671	0.446101
	P4htm	0.185651	0.607683
	Usp19	-0.0376117	0.310376
	Pola1	0.173345	2.37307
	Cdc42	0.0557559	0.677953
	Pknox1	0.0592867	0.537874
	Gmnn	0.148254	1.8178
	Acot13	-0.0333061	0.145126
	Cyp27b1	0.210581	0.229435
	Cdk4	0.145074	2.02182
	B4galnt1	-0.0049583	0.0429093
	Mettl1	-0.0174171	0.094568
	Tspan31	-0.312978	3.37035
	Kif5b	-0.0552579	0.761406
	Saal1	0.069623	0.587009
	Cnp	0.033692	0.387829
	Sulf2	0.0954352	0.193335
	Sod2	0.0280619	0.241717
	Tmco6	0.0408917	0.168178
	Stambp	0.0364209	0.235987
	Ezh1	0.0148564	0.0743624
	Ctnnb1	0.0719434	1.00023
	Eif1b	-0.0468298	0.357781
	Psmd2	-0.0427276	0.41351
	Syngr3	1.46899	3.97337
	Vars	-0.0167431	0.138432
	Vwa7	-0.187679	0.208939
	Msh5	-0.142685	0.474255
	Abhd16a	0.090176	0.992209
	Neu1	-0.343185	2.56116
	Ddah2	0.137743	0.498559
	Clic1	0.0721938	0.71852
	Lsm2	0.0201904	0.14761
	Pole	0.014462	0.107193
	Stx1a	0.122323	0.141359
	Zfp775	-0.0104202	0.0367164
	Mrpl49	-0.0293185	0.21511
	Dennd2c	0.176025	0.999692
	Mark3	-0.0658041	0.922966
	Gatad1	0.00142224	0.0101594
	M6pr	-0.107868	1.40833
	Lrrc8a	0.0408678	0.119626
	Ppp2r1a	0.0191747	0.210692
	Fance	0.0349647	0.151383
	Tinf2	-0.0417426	0.380912
	Tssk4	-0.215468	0.358212
	Dus3l	-0.11677	1.02478
	Gtpbp3	-0.129534	1.0025
	Tgfbr1	0.387734	4.93601
	Homer1	-0.142948	1.14852
	Rad51c	0.18656	0.730055
	Arpp19	0.0342948	0.303071
	Bcl2l1	-0.122434	0.912134
	Khsrp	-0.0202706	0.156207
	Dio2	0.750753	1.54167
	Ccdc124	-0.0041067	0.0158607
	Cct4	0.0578152	0.564176
	0610009B22Rik	-0.142233	0.564781
	Zfp655	0.117856	1.34146
	Rhoa	0.103114	1.83266
	Zmiz1	-0.249998	2.62636
	Ankrd26	-0.225683	2.73747
	Aldh16a1	0.0946856	1.16106
	Hnrnpa0	0.0540771	0.293224
	Prrg2	0.133589	0.193778
	Hnrnph1	-0.083376	1.12567
	Ift43	-0.48026	0.789495
	Id3	0.64143	2.30324
	Arid1a	-0.0421418	0.34694
	Ctsd	-0.278671	2.71442
	Rplp1	0.0662641	0.47711
	Abhd8	0.19314	1.2863
	Ift22	-0.147143	0.498356
	Mid1ip1	-0.0122816	0.074689
	Ap2s1	0.0271001	0.149028
	Fgfrl1	-0.412286	1.42685
	Brme1	-0.0662995	0.148595
	Fhl2	-0.185899	1.12977
	Emc10	0.0742963	0.70528
	Fbxw9	0.143649	0.716941
	Fnbp4	0.0146305	0.0898503
	Cers4	0.0654091	0.43238
	Scrn3	0.189422	0.744195
	Phax	0.0802834	0.854639
	Tle1	0.740249	3.72169
	1700109H08Rik	-0.453802	1.94424
	Relt	-0.098518	1.02597
	Snrpb2	0.0289893	0.268659
	Ubc	0.056288	0.26458
	Prpf31	-0.0120987	0.102981
	Sertad1	-0.114354	0.544832
	Carhsp1	0.113983	1.13509
	Elk3	-0.185558	2.40521
	Herpud2	-0.0169469	0.104416
	Rdh13	-0.0364518	0.236046
	Nutf2	-0.0327482	0.196568
	Arpc5	0.042965	0.382393
	Pou2f2	-0.0162469	0.0493054
	Ubqln4	-0.0107724	0.0842944
	Rps18	0.114655	0.83111
	Rpl10	-0.0198267	0.207529
	Rps15a	0.0890929	0.903329
	Ncaph2	0.132881	2.05784
	Hipk1	0.0970174	1.16487
	Gprc5b	-0.765831	0.7317
	Man1a2	-0.0102142	0.0832767
	Acyp1	-0.0004962	0.00128657
	Hdac5	0.475379	2.70618
	Rala	-0.0261471	0.177245
	Vdac3	0.0192752	0.152534
	Vps72	0.013456	0.0950457
	Gabpa	0.0216058	0.242239
	Bmp7	-0.0714181	0.0563139
	Dynll1	-0.0127932	0.0717481
	Pdcl	0.0720773	0.681664
	Tmem184b	-0.20533	1.90009
	Nf2	-0.0409521	0.487312
	Zmat5	0.0230112	0.130054
	Ewsr1	0.0128614	0.144601
	Ap1b1	-0.0335792	0.37052
	Derl3	0.795379	1.44009
	Gnat2	-0.399105	0.487644
	Bcl2l13	-0.0047296	0.0406197
	Dqx1	-0.115076	0.205461
	Lnpk	0.0116461	0.0827724
	Pttg1ip	0.0947696	0.909894
	Ube2g2	-0.0185268	0.133752
	Met	-1.21672	3.54559
	Elk1	-0.188556	1.977
	Nav1	1.42516	2.3843
	Tnpo1	-0.0307598	0.349187
	Rnmt	0.116279	1.70313
	Srp14	-0.0276764	0.179384
	Cdk9	-0.0656481	0.921298
	Tor2a	-0.0623569	0.464588
	Fpgs	-0.0779414	0.44981
	Mrtfb	0.028361	0.175641
	Cbx5	0.0365313	0.243054
	Apobec3	0.0221887	0.192863
	Vav2	0.151656	0.683258
	Tex15	0.0931025	0.281507
	Ppp2cb	0.0288198	0.335852
	Dmap1	-0.0269969	0.162685
	Mcu	-0.225926	2.02161
	Oit3	-0.319534	1.39487
	Tex11	-1.49005	0.420577
	Bcr	-0.516638	5.13432
	Fxyd5	-0.0187917	0.166621
	Kcnd1	-0.39188	0.49253
	Tfcp2	-0.188015	0.586374
	Pou6f1	-0.24162	0.201412
	Ubp1	-0.0428753	0.353829
	Nuak2	0.0111735	0.0131996
	Cilk1	-0.0828964	0.318998
	Sdhb	0.0781478	0.789904
	Snap47	-0.0144016	0.0613488
	Kdsr	0.25755	1.29331
	Vps4b	0.00764071	0.0736049
	Rps25	0.108158	1.00782
	Taz	-0.216272	1.36535
	Kif19a	-1.32678	1.18014
	Aldh3a2	-0.0016916	0.0113671
	Zmynd10	-0.799288	1.58468
	Tmem115	-0.0197248	0.138932
	Hyal2	-0.29015	1.40496
	Ifrd2	-0.0290095	0.200903
	Hyal1	-0.109469	0.120978
	Tusc2	0.121193	0.827712
	Nprl2	-0.175254	1.98929
	Cacna2d2	0.0470844	0.0485037
	Rassf1	-0.116358	1.76735
	Slc3a2	-0.12126	1.74649
	Nxf1	-0.0931239	1.28811
	Stx5a	-0.0826745	0.669418
	Tnfrsf13b	0.0349345	0.131677
	Spire2	-0.742307	1.22224
	2610507B11Rik	-0.043431	0.54437
	AI597479	0.0609383	0.422082
	Tmem86a	0.154397	0.171909
	Tex14	-0.189982	0.139557
	Ifi35	0.0488321	0.467782
	Rdm1	0.402807	2.15338
	Nedd8	0.0594388	0.530588
	Gosr1	0.00667024	0.0430861
	Mrpl52	-0.0173509	0.0648733
	Kansl3	-0.0945993	1.28044
	Faf1	0.0694568	0.916885
	Tsacc	-0.826867	2.17958
	Mettl16	0.0302984	0.276901
	Pigyl	-0.220297	1.11769
	Rbm25	-0.0180188	0.19718
	Psen2	-0.0734577	0.550225
	Plcd1	-0.0394436	0.0525858
	Fads1	0.0572351	0.529117
	Lmbr1	0.445704	1.45576
	Tnfrsf22	0.219252	1.24795
	Cars	-0.143835	1.46457
	Kdelr3	-0.150965	0.264269
	Apip	-0.106358	0.689589
	Pdhx	0.040154	0.277572
	Vac14	-0.0740449	0.870345
	Mcoln2	0.121062	0.698438
	Akt1s1	-0.0182773	0.0676022
	Tbrg1	-0.0177153	0.147545
	Adssl1	-0.138864	0.580946
	Brf1	-0.180774	2.50049
	Odc1	0.0860804	0.817509
	Thg1l	0.00531595	0.0301512
	Adam19	-0.120726	1.13385
	Pabpc4	0.0119688	0.112676
	Exoc3l2	-1.00566	1.04223
	Zfp296	0.0179375	0.0509732
	Sugp1	0.0265958	0.253848
	Dhdh	-0.0892292	0.266168
	Zfp790	0.0332021	0.165282
	Fuz	0.193902	0.959955
	Pgam1	0.00774366	0.0497201
	Evi5	0.424082	1.05291
	Evi5l	-0.198509	1.26805
	Snapc2	-0.105055	0.552563
	Git1	-0.100265	1.38299
	Gltp	0.0846174	1.06472
	Bnip2	-0.100871	1.72365
	Ccnt1	-0.0381618	0.409544
	Brms1l	0.139694	0.953625
	Med15	-0.0558207	0.671719
	Dhdds	-0.0233401	0.222618
	Crybg2	-0.0386735	0.102753
	Ubxn11	-0.279539	2.02612
	Tjap1	-0.0064958	0.0449567
	Rpl15	0.079435	0.9256
	Tmem167	0.0504723	0.581149
	Mplkip	0.148775	1.09258
	Kif11	0.165152	2.75064
	Rpa3	0.178999	2.15677
	Mlkl	-0.0827186	0.495496
	Tnpo3	0.00384076	0.0354864
	Ttll5	-0.0527362	0.331275
	Zfp715	-0.124749	1.26987
	Cdh23	-0.385286	1.43511
	Rps5	0.0959409	1.09203
	Podnl1	-0.0734903	0.383012
	Adgrl1	0.322649	1.4246
	Amotl1	-0.514972	2.82161
	Etv5	-0.293103	2.99653
	Gfod2	-0.121938	0.345157
	Enkd1	0.0819368	0.467016
	Atp6v0d1	-0.0206225	0.153376
	Ptprs	0.19307	0.959476
	Slc41a1	-0.0378249	0.14869
	B4galnt2	-1.50807	4.51447
	Nelfb	0.0338235	0.387084
	Tmem175	0.0407691	0.225566
	Tango2	-0.0112898	0.0610501
	Ndufs2	-0.0227229	0.221905
	Atraid	-0.0073986	0.0377022
	Cad	-0.0694455	0.623184
	Sh3bp5l	0.10329	0.924621
	Atad1	0.0527353	0.650259
	Pten	0.162197	2.88643
	Pea15a	0.00422925	0.0200013
	Timm23	0.140088	0.978348
	Tnfaip8l2	0.336582	3.0681
	Trnt1	-0.065543	0.810512
	Ehmt2	-0.0121739	0.0770968
	Elof1	0.0434498	0.2673
	Med16	0.0563582	0.355986
	St3gal1	0.218169	1.38189
	Tmem259	-0.0714692	0.700607
	Rnf170	-0.315272	2.39337
	Dedd	-0.0224435	0.176592
	Nit1	-0.0309329	0.146134
	Prdm15	-0.134793	0.945535
	Rnf168	0.125725	1.8417
	Dynlt2b	0.311884	0.513798
	Chp1	-0.0556166	0.675009
	Trpv4	0.679177	0.921841
	Klhl3	0.650072	0.504694
	Tvp23b	-0.130567	1.37953
	Dnajc7	-0.0051744	0.0454572
	Cacybp	0.0901468	1.14531
	Cluap1	-0.0875269	0.369505
	Zswim7	-0.185196	1.01455
	Pigl	-0.0783546	0.458292
	Ndufa2	0.0624117	0.442047
	Pam16	-0.0273357	0.132899
	Glis2	0.262299	0.397324
	Cox6c	0.0984216	1.16837
	Ube2z	-0.0021134	0.017642
	Tmem87b	-0.0512113	0.229004
	Anapc1	-0.0323523	0.360662
	Tsg101	-0.0423325	0.366244
	Hps5	-0.122767	0.937116
	Map3k4	0.0335607	0.223738
	Piezo1	-0.145164	1.74053
	Rnf166	-0.0074081	0.0424602
	Ankrd28	0.0810412	0.953156
	Ankrd52	-0.130637	1.62908
	Srp19	-0.135644	1.84728
	Wdfy2	-0.145088	0.999717
	Rbsn	-0.0388834	0.414807
	Mrps25	-0.0828271	0.668527
	Dguok	0.0915378	0.535026
	Camta1	-0.0256544	0.115989
	Csf1	-0.223161	0.370565
	Strip1	-0.0660454	0.582145
	Slc25a11	-0.0078765	0.0582868
	Chrne	-0.652762	0.902201
	Cmc2	-0.0903131	0.500894
	Chfr	-0.0241307	0.253527
	Ceacam16	-0.930281	5.84838
	Tex261	0.00650896	0.0501051
	Fam120b	-0.0199256	0.155331
	Tbp	0.0956779	1.10949
	Psmb1	0.0758586	0.665049
	Pdcd2	-0.002283	0.0109123
	Fhod1	-0.101914	0.983058
	Plekhg4	-0.52121	2.25562
	Slc9a5	-0.261252	2.29381
	Elmo3	-0.135879	0.487321
	4931428F04Rik	-0.233428	1.60134
	Tppp3	0.264836	0.248242
	Msh3	-0.0576363	0.337985
	Tmem208	0.0319618	0.196544
	E2f4	-0.0792994	1.04651
	Surf4	-0.0822044	0.790629
	Surf2	-0.126456	1.76635
	Dnajb9	0.140994	0.886019
	Naf1	0.0446412	0.31341
	Yes1	0.256111	0.776903
	Ppp1cb	0.154469	2.68912
	Gorasp2	-0.117038	1.57024
	Tsen15	-0.158444	1.06184
	Efr3a	0.0365597	0.429841
	Trappc2l	-0.0579271	0.332765
	Acsf3	0.14615	1.39973
	Ddx19a	0.045118	0.511107
	Galns	0.0620176	0.493269
	C8g	0.44819	0.647948
	Rabl6	0.0116696	0.112544
	Edf1	-0.0672096	0.514257
	Npdc1	-0.0644532	0.0803804
	Fbxw5	-0.0919276	0.896595
	Slc25a13	-0.303575	2.85827
	Ube2i	-0.178706	3.22414
	Tsr3	0.0380682	0.261495
	Unkl	-0.0797222	0.687979
	Lrrk1	-0.44707	3.93594
	Aldh1a3	0.354391	0.622782
	Actn1	-0.12607	0.522262
	Sirt2	-0.0615414	0.584466
	Hnrnpl	0.0497156	0.678356
	Nolc1	-0.0436246	0.499817
	Casd1	-0.10294	0.639442
	Cnksr3	0.716738	1.72265
	Mtmr1	-0.0272221	0.300851
	Hmgb3	0.0650273	0.481472
	Map2	0.814978	0.362157
	Abca1	-0.0199862	0.0461529
	Nipsnap3b	-0.11259	1.04325
	Lage3	0.10846	0.686149
	Ubl4a	0.0597392	0.569327
	Gdi1	-0.313207	2.66814
	Gadd45b	0.0376454	0.147684
	Slamf6	0.612011	1.54812
	Slamf1	0.600755	2.8411
	Zdhhc12	-0.283276	2.74789
	Endog	0.0212691	0.0696069
	Golga7	-0.0410374	0.436067
	Xk	0.0628039	0.197147
	Cd48	0.14729	2.74954
	Clpx	-0.0552243	0.434818
	Trabd	-0.150773	1.79896
	Dennd6b	-0.303316	1.24633
	Cd83	0.416698	0.255254
	Gzmb	-0.137616	0.588741
	Gzmf	-1.91758	4.46654
	C4a	-0.399504	0.868838
	Ager	-0.536397	1.49919
	Atf6b	-0.125399	1.69326
	Egfl8	-0.863961	1.14766
	Ppt2	0.223487	0.529443
	Prrt1	0.25949	0.256255
	Rnf5	-0.0517846	0.341451
	Cacfd1	-0.188156	1.74589
	Hivep2	0.13572	0.809889
	Arnt	0.0048167	0.0382594
	Itga2	-0.0551796	0.187521
	Mocs2	0.0003113	0.00179658
	Nat9	-0.286524	1.40137
	Atp6v0e	0.0732433	0.720082
	Zfp318	0.35468	1.3484
	Srf	0.0133432	0.0761794
	Gata3	0.140028	0.83515
	Lama5	-0.558583	3.99922
	Hspa8	0.0730366	0.8653
	Serac1	-0.309313	1.41651
	Pdzd11	-0.0582879	0.556802
	Psma2	0.0838738	0.894395
	Mrpl32	-0.0100788	0.0583169
	Setdb1	-0.0780456	0.783988
	Anxa9	-0.331983	1.16388
	Arnt2	-1.00033	4.41766
	Prune1	-0.121955	0.93297
	Cers2	-0.131569	1.94233
	Capza2	0.0296468	0.272084
	Plekho1	0.0985879	0.257176
	Vps45	0.00976053	0.047753
	Prpf3	-0.0175525	0.169085
	Anp32e	0.178498	3.07246
	Aph1a	0.106958	1.13543
	Tab2	-0.0103933	0.093026
	Ppil4	0.0711283	0.858849
	Cnih1	0.0111198	0.0865173
	Eps8	-0.356389	3.68975
	Med22	-0.0537899	0.515808
	Surf1	-0.0421216	0.254502
	Med28	0.0649711	0.468746
	Qdpr	0.0436546	0.363591
	Gnrh1	0.27952	0.457367
	Sqstm1	-0.0916834	0.670913
	Nfe2l2	0.422989	4.98117
	Rxra	0.970144	4.57176
	Adamtsl4	-0.45431	0.281596
	Prpsap1	-0.0386875	0.281098
	Ncapg	0.152359	1.79731
	Lcorl	0.115501	1.0321
	Lta4h	0.0510034	0.642659
	Amdhd1	-0.0546587	0.0292171
	Dstn	0.125574	1.0402
	Macroh2a1	0.225473	4.29585
	Gtf2ird2	0.115542	0.477992
	Bola1	-0.151993	0.417084
	Castor2	-0.518663	3.66144
	Ncf1	0.32917	0.962858
	Adss	0.124726	1.97057
	Actr8	-0.0443153	0.307313
	Lrrc27	-0.0646108	0.172767
	Stk32c	-0.233337	1.3967
	Fnta	0.0157755	0.109506
	Mtrex	0.00836272	0.0836725
	Celsr1	-0.0747447	0.598909
	Fli1	-0.0351902	0.401579
	Utp25	0.0323267	0.247865
	Hsd11b1	0.150662	1.46512
	H2-M3	-0.0256125	0.173548
	Lonrf3	0.493802	1.18171
	Atp5e	0.198364	1.32778
	Nelfcd	0.0434753	0.477253
	Ctsz	0.0888931	1.07772
	Prelid3b	0.00595732	0.0415203
	Ube2a	0.0665922	0.471069
	Slc25a5	0.0352372	0.334364
	Ppdpf	0.102692	0.529917
	Col20a1	0.043366	0.0328717
	Pls3	0.328195	0.444838
	Nkap	0.0363661	0.339899
	Ndufa1	0.0915414	0.934326
	E2f3	-0.0890285	1.31493
	Cr1l	0.0311365	0.238708
	Ppfibp1	0.105664	0.555482
	Cd46	-0.0509927	0.0706642
	Plgrkt	-0.0539444	0.37347
	Cd274	0.0986792	0.593135
	Pdcd1lg2	-0.245327	2.38921
	Gtf3a	0.0409997	0.360319
	Mtif3	0.0425293	0.265207
	Lnx2	0.00943041	0.0679071
	Dyrk3	0.359217	3.71722
	Mapkapk2	0.0340377	0.349885
	Il10	-0.224179	0.554665
	Lamp2	0.0426108	0.390634
	Atxn10	0.0389439	0.42734
	Foxred2	0.110393	0.589467
	Eif3d	0.0177378	0.154362
	H3f3b	0.0772267	0.822066
	Nup50	0.0117306	0.100349
	Phf21b	-0.0699849	0.134306
	Ift27	0.142756	1.08044
	Pacsin2	-0.123188	1.38462
	Cmah	0.38779	1.37783
	Ttll12	-0.0424232	0.339125
	Bik	-0.1167	0.230608
	Tox4	0.00638734	0.0532184
	Mrps18c	0.109565	0.521842
	Sulf1	-1.02319	1.21094
	Srsf6	0.0597133	0.922404
	Plcg1	0.00837345	0.0497363
	Kctd2	-0.0423623	0.20778
	Tmprss6	-0.402477	0.52779
	Kctd5	-0.0508787	0.523103
	Etaa1	0.0978018	1.08966
	Slpi	1.10287	0.947256
	Nbr1	-0.0265046	0.164393
	Cyth1	0.169839	1.51211
	Brca1	0.116234	1.59652
	Nt5c3b	0.186285	2.305
	Coa3	0.102497	0.813232
	Zpbp2	0.279218	0.587518
	Med24	-0.0173586	0.124237
	Psmd3	-0.0746548	0.886521
	Exosc10	0.0235108	0.269993
	Glod4	0.113984	1.51227
	Vps53	-0.0414382	0.387585
	Taok1	-0.117437	1.70269
	Dnttip1	0.0623936	0.602128
	Acot8	-0.114474	0.756664
	Mpp2	0.247543	1.52917
	Nlk	-0.167714	1.54132
	Traf4	0.232414	2.21541
	Aldoc	0.0270831	0.0488658
	Stac2	-0.0117159	0.0150006
	Rpl19	0.152182	1.69786
	Nek8	0.183056	1.29247
	Cacnb4	0.135472	0.250468
	Plxdc1	-0.164941	1.05658
	Arl5b	0.0496116	0.237663
	Zfp207	0.0402	0.422438
	Psmd11	-0.0074619	0.0679948
	C1qtnf1	0.773177	1.24264
	Pipox	-0.260172	0.316268
	Timp2	1.15647	2.90532
	Zc3h18	-0.0898457	1.38271
	Top2b	0.102981	1.11094
	Igfbp4	1.06757	4.07113
	Cdc6	0.0653139	0.799582
	Suz12	0.10446	1.64581
	Atad5	0.00033588	0.00263519
	Crlf3	0.0684415	0.706401
	Tnfaip1	0.075414	0.550589
	Abr	-0.200119	3.09812
	Rab11fip4	-0.509479	3.85939
	Cd40	1.21758	2.28434
	Slc35c2	-0.161219	2.64695
	Elmo2	-0.290955	3.28073
	Wsb1	-0.0104673	0.0715621
	Ttpal	0.0136272	0.12289
	Rhot1	-0.113735	1.22409
	Rhbdl3	-0.812817	1.7739
	Ada	0.163976	1.22228
	Serinc3	0.132161	1.89258
	Tha1	0.178272	0.414912
	Pgs1	-0.169884	2.84724
	Birc5	0.119648	1.4074
	Afmid	-0.153684	0.79534
	Pigt	-0.0127893	0.091518
	Etv4	-0.417638	2.66524
	Mmp9	0.36953	0.911348
	Ghdc	-0.32297	2.09265
	Pltp	0.0437698	0.144634
	Slc12a7	-0.198836	0.988814
	Ctsa	0.0992151	1.45434
	Zswim1	0.0535047	0.340674
	Slc12a4	-0.296066	3.40124
	Myo1c	0.500226	3.44644
	Crk	0.0599987	0.699472
	Cox7c	0.0828619	0.918122
	Pitpna	0.0662309	0.937556
	Mlx	-0.0221612	0.131936
	Retreg3	0.161847	1.73682
	Dhx58	-0.0350299	0.173922
	Rab5a	0.0150113	0.107348
	Nkiras2	-0.0960582	1.01543
	Ppp2r5c	0.0232599	0.259228
	Ift52	0.0553256	0.618029
	Mybl2	0.042259	0.393494
	Eya2	-0.125019	1.17892
	B4galt5	-0.190372	2.38346
	Ddx27	0.0264792	0.281304
	Cyth3	0.0248444	0.125836
	Cyth4	-0.169509	2.07791
	Rac3	-0.67789	0.8106
	Rrp7a	-0.027158	0.228366
	Cyb5r3	-0.0650587	0.740512
	Ints2	-0.120465	1.51787
	Med13l	-0.111965	1.22777
	H2bc4	-0.101347	0.149731
	Mafk	-0.140628	1.16438
	Med1	-0.059731	0.877876
	Erbb3	0.0923036	0.422746
	Stard3	-0.109305	0.966825
	Ikzf3	0.199515	1.19631
	Mfng	-0.119304	1.88598
	Vmp1	-0.0994427	1.05263
	Uchl5	0.0913897	1.11684
	Glrx2	-0.10325	0.874789
	Ro60	-0.0456599	0.182109
	Stk4	0.133593	1.88558
	Zcchc10	0.0857815	0.864522
	Psmb6	-0.0049396	0.027266
	Spag7	0.0176556	0.118047
	Pfn1	-0.0011074	0.00801153
	Tomm34	-0.0788104	0.745936
	Ywhab	0.0900098	1.41124
	Ksr1	-0.35716	4.97774
	Anxa6	0.0702345	1.08093
	Il12rb2	0.0540477	0.295406
	Zkscan6	0.0405649	0.287455
	Kpna2	0.0548191	0.404523
	Smurf2	0.128055	1.03332
	Cep95	-0.052419	0.216037
	Vezf1	-0.0346426	0.354412
	Cuedc1	-0.129259	0.504672
	Srsf1	0.0913551	1.31974
	Abi3	-0.059176	0.355348
	Kif3a	-0.0368688	0.144786
	Septin8	-0.547707	1.63587
	Mtmr4	0.0939073	0.713805
	Mrm1	0.0041622	0.0166699
	Kansl1	0.0440646	0.391463
	Gid4	0.0441374	0.301118
	Myo1b	-0.425429	1.11194
	Dhx40	0.157837	1.54015
	Ypel2	0.392037	0.405009
	Akap1	0.101915	0.964282
	Nol11	-0.0148076	0.117667
	Derl2	-0.0409902	0.40598
	C1qbp	0.0529263	0.556631
	Rpain	0.0160448	0.0632588
	6330403K07Rik	0.967003	1.26539
	Kcnab3	0.0844792	0.117175
	Chd3	-0.0872008	1.03257
	Kdm6b	-0.187605	1.70594
	Appbp2	0.010517	0.104636
	Adora2b	-0.191406	0.706706
	Ncor1	0.0214743	0.227782
	Trpv2	-0.0809527	1.08098
	Cenpv	0.141978	1.17302
	Pcgf2	-0.10484	0.760117
	Cwc25	0.0639774	0.530978
	Pip4k2b	-0.118732	1.89356
	Trim37	0.118632	1.58941
	Ctdnep1	-0.0104507	0.101589
	Elp5	-0.0137924	0.105912
	Gabarap	-0.0256212	0.192355
	2810408A11Rik	-0.277123	0.467774
	Phf23	-0.0408608	0.432024
	Acadvl	0.0759745	0.623735
	Dnah11	-0.188667	0.260629
	G3bp1	0.0594027	0.653983
	Atox1	-0.0151765	0.0892086
	Mief2	-0.0745282	0.491597
	Dusp14	-0.331778	1.69309
	Tada2a	-0.0139094	0.0740474
	Ikzf1	0.0298347	0.227971
	Pnpo	-0.129336	1.20839
	Cog1	-0.154291	1.78925
	Cbx1	0.0471974	0.541208
	Cdk5rap3	0.02864	0.276383
	Copz2	-0.622228	0.782556
	Slc25a39	-0.0257734	0.261119
	Sp2	0.0577126	0.568506
	Aatf	0.0136218	0.122518
	Dync1h1	-0.0766651	0.611085
	Pex12	-0.0879808	0.701422
	Ndel1	-0.121584	1.08041
	Slc25a35	-0.335931	0.864304
	Zbtb4	-0.26387	1.38384
	Mpdu1	0.0266602	0.194444
	Fxr2	-0.0452269	0.355736
	Atp5g3	0.0563055	0.443898
	Cd68	-0.229212	0.802785
	Acsl1	-0.0341515	0.221613
	Abca5	-0.121368	0.195312
	Smyd4	-0.0851663	0.443092
	Lsp1	0.113217	2.03202
	Zfyve27	-0.216733	2.43446
	Avpi1	-0.291389	1.51596
	Rad51d	-0.0319878	0.197953
	Pank3	-0.112761	1.43559
	Rars	-0.0378805	0.336922
	Mrpl58	0.136216	1.37446
	Fdxr	0.0557876	0.394936
	Sult4a1	-0.583928	0.684249
	Mrpl45	0.0362026	0.310713
	Irf1	0.102413	1.17258
	Slc22a5	0.0123253	0.0518686
	P4ha2	0.185247	0.451823
	Arrb1	0.14012	1.02371
	Csf2	0.314624	0.482224
	Pelp1	-0.0261515	0.16846
	Med11	0.0844587	0.699813
	Heatr9	1.1247	2.31566
	Ccl4	-0.20432	0.62843
	Natd1	0.148503	0.792638
	Map2k3	-0.0773484	0.766624
	Ywhah	0.0457544	0.443697
	Sart3	-0.0317701	0.340338
	E2f2	0.342547	2.93526
	Slfn3	0.174901	2.11343
	Nars2	-0.122487	0.840505
	Slc35b4	-0.129543	1.32328
	Dalrd3	-0.0740224	0.50467
	Fis1	0.117307	1.6016
	Plod1	-0.0314192	0.0729754
	Rab3d	-0.0956849	0.595076
	Mfsd3	-0.246677	1.24202
	Slc25a22	-0.110767	0.876748
	Atp6ap1	-0.0571071	0.539474
	Dnase1l1	-0.0704791	0.239005
	BC005537	-0.0619758	0.824491
	Isyna1	-0.0702832	0.570318
	Hars2	-0.045923	0.313979
	Tmem160	0.0132034	0.0478311
	Rab5c	-0.0689786	0.767015
	Mdh2	-0.0825438	1.14901
	H13	-0.0858121	1.26345
	Rnf145	0.0891265	0.945921
	Scn1b	-0.282242	0.841353
	Atp6v1e1	-0.0391925	0.289972
	Chtf18	0.0523246	0.347707
	Rps6kl1	-1.31745	1.57411
	Ppp1r12c	-0.0856853	0.92188
	Ahr	0.37909	4.52125
	Map1s	-0.0744634	0.451391
	Tmem129	-0.0129272	0.0715217
	Nop9	-0.0009873	0.00716188
	Atp6v0a1	-0.646386	4.48754
	Psmc3ip	-0.0083061	0.0383295
	Grb7	-0.35992	0.281791
	Noxo1	0.0093482	0.0109463
	Aoc3	-1.28183	2.6462
	Zfp687	-0.0654748	0.487282
	D8Ertd738e	0.0110282	0.057465
	Calm3	0.105472	1.50604
	Cops3	0.111237	1.04407
	Fkbp8	-0.101989	1.17639
	Ddx39b	-0.0354484	0.395701
	Gipc1	-0.0634256	0.472636
	Tlcd1	0.0130195	0.0238175
	Plscr3	0.00959583	0.0341802
	Ptger1	0.572741	0.691307
	Arhgef25	-0.175149	0.386134
	Xab2	0.00301639	0.0244364
	Cdc37	0.0536106	0.746044
	Trip10	-0.276064	1.91142
	Cops6	0.0452857	0.375484
	Ubb	0.113313	1.68979
	Ap4m1	-0.0174581	0.0926905
	Gyg	0.00693845	0.0452593
	Rcn3	-0.118662	0.282281
	Slc6a8	-0.400383	0.597436
	Arid3a	-0.0225703	0.157628
	Ubxn6	0.0216994	0.11176
	Mydgf	-0.0309209	0.200455
	Cyb561	-0.0931378	0.158028
	Sema6a	-0.313723	0.307999
	Ccdc12	-0.0054565	0.0378541
	Fmc1	0.194826	0.987387
	Akt3	0.375512	2.91876
	Mrpl24	-0.0370559	0.325143
	Gle1	0.100527	1.32484
	Lyst	0.173246	1.05529
	Slc35e1	-0.0950651	1.44912
	Calr3	-1.02478	2.33953
	Tmc4	0.0174006	0.0316776
	Syne4	0.0643964	0.0823728
	Polr2i	-0.0731608	0.476197
	Krt10	0.737944	1.44632
	Rmnd1	0.00827608	0.030086
	Esr1	0.380309	0.798795
	Fbxo5	0.129221	1.68026
	Mtrf1l	0.0240064	0.100991
	Hdac2	0.0680142	0.869109
	Rwdd1	0.101484	1.0565
	Stxbp5	-0.13614	2.36836
	Hint3	-0.101697	0.545254
	Trmt11	0.219928	2.74008
	Katna1	0.125061	1.3445
	Pcmt1	0.11543	1.76191
	Lrp11	-0.387663	2.96994
	Mtres1	-0.169987	0.881775
	Sec63	-0.0814576	1.07174
	Snx3	0.0484648	0.512263
	Aig1	-0.151337	0.627196
	Adat2	0.0701947	0.362611
	Pex3	-0.0793723	0.799725
	Fuca2	-0.155195	1.39705
	Cep57l1	0.147659	1.0294
	Ltv1	-0.0911694	0.903044
	Cd164	-0.0804414	1.2054
	Utrn	0.084726	0.557537
	Smpd2	0.0496056	0.168081
	Mical1	-0.0906622	1.18271
	Zbtb24	-0.0887314	0.546736
	Rab32	0.306744	1.49769
	Gtf3c6	-0.0547877	0.385074
	Slc16a10	-0.318799	2.94955
	Rev3l	-0.0689203	0.499354
	Traf3ip2	0.0898962	0.705926
	Fyn	-0.06261	0.914269
	Tube1	0.177476	1.43046
	Prep	-0.042744	0.382211
	Tnfaip3	0.095522	0.346482
	Perp	0.111487	0.595852
	Arfgef3	-0.279061	2.72198
	Reps1	-0.0867672	1.18698
	Asf1a	0.248481	3.31658
	Gopc	0.015968	0.126233
	Qrsl1	-0.169639	1.49466
	Rtn4ip1	-0.162097	1.34957
	Crybg1	0.0699851	0.874197
	Vta1	0.0466748	0.392832
	Smpdl3a	0.542136	2.16079
	Reep3	0.220288	3.38808
	Serinc1	0.0261335	0.252971
	Hsf2	0.154487	1.12188
	Echdc1	-0.03684	0.229177
	Ptprk	0.00948863	0.0221711
	Dcbld1	0.747445	2.28047
	Ccdc59	-0.0491396	0.475283
	Ppp1r12a	0.025265	0.267291
	P4ha1	-0.0972673	0.945621
	Septin10	0.299692	1.52962
	Lims1	0.0630972	0.751464
	Zwint	-0.150335	2.11533
	Ube2d1	-0.0454889	0.390601
	Slc17a8	-0.830338	3.53785
	Cdk1	0.0911622	0.9456
	Atp2b1	0.115201	1.23722
	Cabcoco1	0.0449954	0.0708729
	Arid5b	0.209106	0.523444
	Actr6	0.0165718	0.082648
	Uhrf1bp1l	-0.053443	0.547237
	Poc1b	0.0414985	0.281118
	Dusp6	-0.0392371	0.24542
	Tmpo	0.157139	2.2706
	Psen1	0.012867	0.110007
	Sgk1	-0.0542149	0.402461
	Cep290	0.0226333	0.0522075
	Ikbip	-0.0427111	0.0829997
	Hbs1l	-0.111207	1.59948
	Epb41l2	0.0444872	0.415641
	Apaf1	-0.005886	0.0400875
	Myb	-0.200618	1.10333
	Med23	-0.0171074	0.123209
	Ahi1	0.00119862	0.00492715
	Nedd1	0.0693069	0.854214
	Mtfr2	0.0647134	0.445095
	Map7	-0.330561	2.05299
	Stx7	-0.139654	1.31495
	Pex7	0.0227988	0.144679
	Ifngr1	0.268647	2.60729
	Cfap54	-0.268715	2.07357
	Cdk17	0.0117322	0.0997214
	Snrpf	0.0338369	0.208777
	Usp44	0.322384	0.843089
	Fgd6	0.0114163	0.0511167
	Ndufa12	0.0658916	0.497924
	Tmcc3	-0.168865	0.504196
	Cep83	-0.0180212	0.171441
	Socs2	0.371756	3.02231
	Nudt4	0.142537	1.94842
	Tcp11l2	0.430812	1.53291
	Cry1	-0.0350284	0.261362
	Btbd11	0.837843	2.51847
	Hsp90b1	-0.044447	0.319045
	Washc3	0.18582	2.4503
	Dram1	0.239888	0.44536
	Sirt1	0.089865	1.18779
	Herc4	0.00515381	0.0420776
	Hnrnph3	-0.103427	1.04485
	Rufy2	-0.0316042	0.145758
	Ccar1	-0.0803676	0.999722
	Ddx21	0.0257425	0.263337
	Ddx50	-0.0130177	0.115743
	Srgn	-0.0412374	0.340328
	Vps26a	0.0437339	0.35238
	Supv3l1	-0.163996	1.96545
	Fam241b	-0.256511	0.358187
	Aifm2	-0.183305	0.984275
	Tysnd1	-0.0762007	0.411036
	Sar1a	0.0441208	0.566582
	Ppa1	-0.021889	0.140652
	Eif4ebp2	0.056927	0.65794
	Pald1	-0.713191	2.22538
	Sgpl1	-0.0869089	0.887871
	Unc5b	-0.0150121	0.0534399
	Slc29a3	-0.116475	1.02979
	Vsir	-0.0418492	0.286383
	Lrig3	-0.132472	0.106084
	Anapc16	0.0388445	0.365552
	Ddit4	-0.0441055	0.246219
	Dnajb12	-0.0711326	0.699939
	Micu1	0.0751155	0.811215
	Cand1	0.0217489	0.201215
	Tbk1	-0.13911	2.36306
	Pno1	-0.0497753	0.323677
	Plek	-0.047607	0.433349
	Usp15	-0.0371714	0.397185
	Vps54	0.0438538	0.290188
	Tbc1d15	0.169943	2.10016
	Pcsk4	0.0718412	0.259151
	Rab21	-0.0311105	0.310343
	2310011J03Rik	0.0158727	0.0985321
	Peli1	0.100139	0.901756
	Thap2	-0.0420623	0.189733
	Slc1a4	-0.248645	1.20453
	Dock2	-0.0017172	0.0166089
	Rab1a	-0.0053929	0.038271
	Actr2	-0.0132565	0.106172
	Ndufs7	-0.0787388	0.567163
	Pwwp3a	-0.161814	1.58118
	Uqcr11	0.0458097	0.236847
	Cnot2	-0.0062189	0.0584158
	Tcf3	0.0983602	0.859058
	Frs2	0.0331034	0.269813
	Yeats4	0.0187946	0.118713
	Grb10	-0.635133	1.47204
	Adora2a	0.143935	0.522312
	Snrpd3	0.0609633	0.605268
	Ddc	0.101895	0.112546
	Cpm	0.182878	0.560048
	Mdm2	-0.0287483	0.194305
	E2f7	0.139582	1.23306
	Csrp2	-0.0109353	0.0271626
	Osbpl8	0.115869	1.49009
	Mknk2	0.0482873	0.465398
	Spata48	-0.0846372	0.18332
	Zpbp	0.0524191	0.101334
	Cabin1	-0.13031	2.25958
	Ap3d1	-0.118799	1.81521
	Phlda1	-0.479616	3.06727
	Sf3a2	0.064814	0.590599
	Mdm1	0.0437133	0.232653
	Timm13	-0.0101064	0.0451956
	Vps13d	-0.0281577	0.174392
	Llph	-0.0200982	0.117897
	Tmbim4	-0.0632648	0.517084
	Helb	0.0129585	0.0811174
	Prmt2	-0.245056	1.67439
	Dip2a	-0.340475	3.11958
	Hmg20b	-0.0182001	0.0930448
	4930404N11Rik	-0.587383	0.998857
	Fzr1	0.0135494	0.10389
	Ncln	-0.072592	0.786071
	Col6a2	0.534033	1.86628
	Hcfc2	-0.115686	1.2215
	Nfyb	-0.0061534	0.047587
	Txnrd1	0.0538018	0.685486
	Glt8d2	-0.226991	0.203947
	Ppm1m	0.163447	0.991977
	D10Wsu102e	0.0554711	0.520635
	Aldh1l2	-0.71177	1.55037
	Wdr82	0.123	1.11372
	Glyctk	-0.154102	0.732491
	Pofut2	-0.189883	2.67685
	Slc36a1	-0.0195242	0.107982
	Adarb1	-0.0732789	0.181633
	Appl2	-0.184101	1.06477
	Sumo3	0.0681896	0.748162
	Hint1	0.129001	1.14965
	Lyrm7	0.0918962	0.286014
	Fbxw11	-0.0126053	0.105257
	Stk10	0.165095	2.11172
	Papolg	-0.0655411	0.716858
	Rel	-0.0444125	0.319733
	Pfkl	-0.0860915	0.918053
	Pus10	0.00123195	0.00851179
	Pex13	0.0306342	0.204896
	Cfap410	0.301005	1.01857
	Mpg	-0.114193	0.748681
	Ahsa2	-0.153528	2.20793
	Nprl3	-0.108866	0.846993
	Xpo1	0.107168	1.82956
	Nsg2	0.722394	2.37416
	Cpeb4	-0.322122	3.26465
	Stc2	0.288872	1.58521
	Asb3	0.108974	0.631988
	Cdc34	0.038107	0.222081
	Tpgs1	0.157662	0.597209
	Chac2	0.0860475	0.252242
	Erlec1	0.0176484	0.122582
	Sptbn1	-0.0170165	0.127986
	Wdpcp	0.349611	0.94067
	Mdh1	0.110218	1.95808
	Ccng1	-0.0392559	0.391614
	Nudcd2	0.0446628	0.366049
	Polrmt	-0.0407893	0.283273
	Hmmr	0.0705602	0.81902
	Hcn2	0.105901	0.181846
	Acsl6	1.54399	1.7797
	Cyfip2	-0.0533028	0.731148
	Mgat1	-0.0196396	0.161866
	Ppp2ca	0.0564144	0.643727
	Hnrnpab	0.00972044	0.0714921
	Phykpl	-0.224229	2.03245
	Hspa4	-0.0445723	0.467452
	Cnot6	0.0205359	0.207123
	Mapk9	-0.0833919	0.96192
	Canx	-0.0021843	0.0168634
	Rack1	0.0778626	0.685847
	Rasgef1c	-0.0150107	0.00839708
	Rufy1	0.0795025	0.452826
	Rnf130	-0.12472	0.647447
	Rad50	0.00789956	0.0601702
	Mrnip	0.11515	0.315801
	Clk4	0.0566981	0.315454
	Sar1b	0.097496	0.905637
	Jade2	-0.0991489	0.599654
	Cdkl3	-0.314083	2.20173
	Ube2b	0.0968838	0.989294
	Cdkn2aipnl	0.0654147	0.732129
	Kremen1	0.0953608	0.804765
	Itk	0.00752626	0.0665652
	Nefh	0.0919803	1.02067
	Med7	-0.0622034	0.485424
	Havcr2	-0.485708	3.49312
	Tnip1	-0.0946818	1.03747
	Fam71b	-0.0770156	0.552569
	Vdac1	0.0239441	0.264939
	Upp1	-0.481115	1.93364
	Slu7	0.172604	2.94857
	Ascc2	-0.0498705	0.538288
	Hus1	-0.0195028	0.140894
	Pttg1	-0.0302445	0.14884
	Hormad2	0.233035	0.308451
	Zfp607a	-0.149065	0.732725
	Tns3	-0.381917	0.689065
	Btg2	-0.0329481	0.20699
	Castor1	0.371007	2.11835
	Pes1	0.118148	1.77837
	Tcn2	-0.171617	0.604531
	Myo1g	-0.0234652	0.24954
	Smtn	0.184937	0.673821
	Arf5	0.0800613	0.700435
	2310033P09Rik	-0.0811704	0.447057
	Guk1	-0.0126829	0.0544727
	Rnf185	0.113139	0.912427
	Limk2	-0.0960655	0.934723
	Patz1	0.0914641	0.601604
	Eif4enif1	0.0189388	0.220649
	Trim11	-0.184726	1.7479
	Ogdh	-0.122683	1.9014
	Drg1	0.0366765	0.278777
	Rtn4	-0.038116	0.373545
	Mtif2	0.0154355	0.102451
	Rps27a	0.0760094	0.753246
	Cfap36	0.0009423	0.00503189
	Ppp4r3b	0.0141687	0.154832
	Pnpt1	0.0045148	0.0348914
	Pold2	0.105482	1.15415
	Zkscan17	0.00584582	0.039124
	Polm	-0.225706	2.67778
	Dbnl	0.0783342	0.855229
	Mrps24	0.0943925	0.669333
	Ccdc117	0.536709	4.13107
	Dynll2	0.0268821	0.276286
	Xbp1	0.025761	0.223168
	Supt4a	0.194973	2.58334
	2810021J22Rik	-0.256813	1.80119
	Ska2	0.198058	2.36971
	Prr11	0.0439874	0.32895
	Smg8	0.00707442	0.0480133
	Rnf187	0.0190738	0.155823
	Tubd1	-0.222979	1.0229
	Mrpl22	0.152849	1.46532
	Cnot8	0.116362	1.9491
	Rps6kb1	0.00492449	0.0422144
	Sap30l	0.0510195	0.28614
	Galnt10	-0.385663	3.1438
	Rnft1	-0.120563	1.02805
	Mfap3	-0.156416	2.44396
	Fam114a2	-0.0272518	0.236495
	Ppm1d	0.0646072	0.522111
	Znhit3	-0.0311042	0.121111
	Myo19	-0.323424	3.97665
	Prpsap2	-0.0137134	0.0877065
	Ggnbp2	0.105272	1.5105
	Acaca	-0.0738028	0.586955
	Shmt1	0.0243451	0.225563
	Llgl1	0.116069	1.17912
	Drg2	-0.0057678	0.0438052
	Srebf1	-0.0810634	0.720264
	Tom1l1	0.248223	0.260284
	Cox11	-0.0270386	0.112545
	Stxbp4	-0.051172	0.0950818
	Bzw2	0.118769	1.67278
	Elac2	-0.0807154	1.26736
	Pctp	-0.0330815	0.17674
	Polr1f	0.102389	0.958907
	Atxn7l1	-0.156896	1.20049
	Sypl	-0.0906556	1.02858
	Pdia6	-0.0832531	0.743432
	Nampt	0.237038	3.8869
	Pik3cg	0.026009	0.279904
	Nbas	-0.232324	3.47792
	Tspan13	0.195722	2.19049
	Rock2	-0.0198693	0.20542
	Laptm4a	0.0437786	0.388981
	Cyria	0.28479	2.31205
	Snx13	-0.135724	1.14884
	Sdc1	0.0750881	0.133501
	Lpin1	0.0418674	0.25596
	Pum2	0.0797913	1.30507
	Nrcam	-0.0805698	0.145361
	Rgs9	0.00972317	0.0131795
	Trib2	0.444243	1.23196
	Arsg	-0.198928	0.371088
	Hs1bp3	0.109656	0.348696
	Lratd1	1.44873	2.00812
	Smc6	0.113348	1.76549
	Amz2	0.321815	3.00904
	Gna13	0.104504	1.86817
	Prkar1a	0.0666161	1.14788
	Fam20a	-0.40295	4.06464
	Rdh14	0.261998	1.75011
	Map2k6	0.234598	0.886421
	Trappc12	0.0230686	0.154144
	Adi1	0.160852	1.58078
	Rnaseh1	-0.121891	1.26262
	Ubxn2a	-0.0955768	1.47006
	Cmpk2	0.258624	1.22901
	Pfn4	-0.324384	0.436089
	Itsn2	-0.0316313	0.413123
	Rsad2	-0.0426836	0.0885636
	Rnf144a	1.11294	1.47701
	Id2	-0.247735	1.49909
	Mboat2	0.241053	0.723192
	Ncoa1	0.089366	0.648043
	Dus4l	-0.112531	0.831041
	Rrm2	0.0470421	0.439271
	Bcap29	-0.0017256	0.0118022
	Cenpo	0.0120638	0.0656419
	Klf11	0.287381	1.63044
	Adcy3	-0.0465415	0.315818
	Grhl1	-0.120607	0.235409
	Dnajc27	0.335244	1.83996
	Efr3b	0.674957	1.32076
	Cbll1	0.0408055	0.293883
	Dnmt3a	-0.182661	2.6623
	Dld	0.0873932	1.21972
	Kif3c	0.130605	0.704171
	Sh3yl1	0.0377316	0.0521291
	Rab10	0.00659345	0.0590591
	Ddx52	0.0404389	0.442212
	Taf15	0.0146486	0.136901
	Cdc27	0.00422539	0.0387817
	Itgb3	-0.418834	2.63779
	Mettl2	0.112332	1.05643
	Nle1	-0.0149802	0.0689976
	Tlk2	0.020852	0.159812
	Rffl	0.194331	0.975011
	Lig3	-0.0873546	1.20323
	Map3k3	0.031458	0.233252
	Ccl1	-0.209793	0.147169
	Ddx42	0.00947307	0.0949324
	Ftsj3	-0.0405588	0.51264
	Rnf135	-0.556346	3.47156
	Psmc5	-0.0305649	0.227062
	Tcam1	0.797573	2.24991
	Ern1	-0.4634	4.92737
	Nf1	0.0166649	0.0737336
	Pecam1	0.0899041	0.389154
	Polg2	-0.0234698	0.0838217
	Ddx5	0.00282216	0.029841
	Psmd12	-0.0079058	0.0537244
	Helz	-0.0586229	0.634159
	Rab37	0.241503	3.03525
	Slc9a3r1	0.0976121	1.06635
	Nt5c	0.0194791	0.104977
	Jpt1	0.0947866	1.11393
	Sumo2	0.0713758	0.446355
	Nup85	0.0266013	0.25402
	Gga3	-0.110679	0.975152
	Cluh	-0.0785624	1.05129
	Mif4gd	-0.116975	1.0048
	Slc25a19	-0.0597004	0.434187
	Pafah1b1	0.0356489	0.420586
	Tmem94	-0.0505693	0.389572
	Recql5	-0.147844	0.841505
	Sap30bp	0.0693628	0.744977
	Itgb4	-0.0308138	0.0210206
	Galk1	0.0333344	0.148167
	Unk	-0.0721793	0.424001
	Mrpl38	-0.112804	0.936363
	Fbf1	-0.133617	0.922549
	Acox1	-0.307798	2.54558
	Ten1	0.0545071	0.368683
	Srp68	-0.103638	1.56877
	Tsen54	0.0991009	0.711922
	Llgl2	-0.187923	1.14088
	Ncbp3	0.115248	1.8918
	Camkk1	0.23706	1.00656
	P2rx1	0.103444	0.0659166
	Atp2a3	0.0977467	1.13163
	Ankfy1	-0.0121092	0.117694
	Exoc7	0.0839545	0.82453
	Ube2g1	-0.0373347	0.358718
	Spns3	-1.64092	3.50073
	Med31	-0.028296	0.0995972
	Ube2o	-0.1433	1.82087
	Txndc17	-0.0270733	0.219629
	Rhbdf2	-0.356887	3.84306
	Pimreg	0.193399	1.99292
	Wscd1	-0.0156803	0.0295175
	Snhg16	-0.0952338	0.542442
	Rabep1	-0.093502	1.0288
	Mfsd11	-0.102976	0.367325
	Kif1c	-0.0880775	1.25727
	Sec14l1	-0.0519402	0.269214
	Mink1	-0.247734	3.35922
	Pld2	-0.441668	1.78205
	0610010K14Rik	-0.335783	0.695291
	Eral1	0.0574158	0.550831
	Dhrs13	-0.0099681	0.0529452
	Blmh	0.122357	1.85065
	Cpd	-0.349604	1.31588
	Timm22	0.0847683	0.714366
	Nxn	-0.0571026	0.355551
	Rflnb	0.417208	0.614303
	Rph3al	-0.0866751	0.218703
	Ywhae	0.0933001	1.27901
	Prpf8	-0.0876676	1.33689
	Nme2	0.747727	1.24786
	Spag9	-0.0923642	1.42575
	Luc7l3	0.00098913	0.0071461
	Ankrd40	-0.0101533	0.0948387
	Abcc3	-0.647707	2.30377
	Xylt2	-0.030923	0.157822
	Lrrc59	-0.0251843	0.166116
	Tac4	0.0387322	0.0850791
	Slc35b1	-0.10359	1.07168
	Snx11	-0.101039	0.898269
	Scrn2	-0.080558	0.328353
	Cacnb1	0.131568	0.201404
	Fbxl20	0.253575	0.990772
	Dlg4	0.068729	0.460472
	Dvl2	0.0354942	0.230274
	Nr1d1	0.256521	0.325684
	Gucy2e	-0.0442415	0.0832516
	Alox8	0.134152	0.151071
	Per1	-0.10278	0.796385
	Vamp2	-0.155014	0.99826
	Tmem107	0.225222	1.30898
	Aurkb	0.107028	1.11952
	Ctc1	-0.0337608	0.226001
	Pfas	-0.116491	1.22745
	Myh10	0.109672	0.10895
	Pik3r5	0.0288427	0.138663
	Stx8	-0.088572	0.713721
	Adprm	0.0555163	0.362955
	Top2a	0.151327	1.9648
	Acly	-0.0175002	0.158474
	Kat2a	-0.0064875	0.0600405
	Stat5b	0.112881	1.39127
	Tmem101	0.0451354	0.243919
	Lsm12	0.0517916	0.557816
	Ubtf	0.0278011	0.254048
	Ccdc43	-0.0288914	0.222344
	Eftud2	-0.0168757	0.158415
	Dcakd	-0.0444241	0.27941
	Nmt1	-0.0126174	0.0960408
	Map3k14	0.023956	0.170643
	Gosr2	0.0363885	0.439079
	Klhl28	-0.10738	0.89101
	Fkbp3	0.0801381	1.04957
	Scfd1	-0.0811689	1.06552
	Coch	-0.79359	2.20554
	Strn3	-0.0661798	0.64745
	Ap4s1	-0.0796486	0.455151
[truncated: 11,958 more rows]

## Sheet: 5C
	mRNA expression (TPM)
	Gene name	WT			Pim dKO
	Gzmb	30158.5	32338.6	30284.9	18999.3	28599.7	28951.6
	Gzma	16004.6	18083.4	16245.1	9989.82	16450.9	16212.5
	Prf1	741.674	853.475	708.309	142.613	432.624	390.397
	Gzmc	686.642	807.52	618.543	137.026	362.999	368.869
	Gzme	412.071	523.672	368.851	14.0339	136.565	130.024
	Gzmd	597.507	748.764	518.159	19.349	199.763	196.82
	Gzmk	43.8784	25.3132	38.614	47.6355	35.4178	39.1662
	Gzmf	21.2271	28.1974	16.3201	0.959967	7.59124	4.50675
	Gzmg	62.858	90.1694	58.9146	1.38647	15.3495	16.8707

## Sheet: 5D
	mRNA expression (TPM)
	Gene name	WT			Pim dKO
	Gzmb	30158.5	32338.6	30284.9	18999.3	28599.7	28951.6
	Gzma	16004.6	18083.4	16245.1	9989.82	16450.9	16212.5

## Sheet: 5E
	mRNA expression (TPM)
	Gene name	WT			Pim dKO
	Slc2a1	123.3	137.5	134	94	120.6	109.6
	Slc2a3	78	89.7	80	50	79.4	69.6

## Sheet: 5F
	Gene name	log2FC mRNA (all)	log2FC proteins (all)	prot up (FC>1.5, q<0.05) mRNA not up (FC<1.2)	prot down (FC<0.67, q<0.05) mRNA not down (FC>0.83)
	Aaas	-0.016128	-0.51157
	Aacs	-0.0595642	-0.314219
	Aagab	-0.0156545	-0.45767
	Aak1	-0.0062697	-0.159698
	Aamdc	0.107517	0.116743
	Aamp	-0.0150028	-0.326008
	Aar2	-0.0142166	-0.106273
	Aars	-0.100942	-0.4036
	Aars2	-0.197166	-0.327117
	Aarsd1	0.0637982	-0.349212
	Aasdhppt	0.0257721	-0.511476
	Aatf	0.0136218	-0.0990291
	Abca7	-0.224913	0.426817
	Abcb10	-0.0714185	0.0441795
	Abcb1a	0.0296054	-0.202584
	Abcb1b	0.00871124	-0.011966
	Abcb7	0.0744616	-0.201732
	Abcb8	-0.062161	-0.325722
	Abcb9	-0.181797	-0.174092
	Abcc1	-0.219821	-0.256122
	Abcc4	-0.0381582	-0.24392
	Abcd1	0.0607691	-0.0337236
	Abcd3	-0.0599469	-0.249938
	Abce1	-0.006732	-0.329567
	Abcf1	-0.0307419	-0.217876
	Abcf2	0.0467118	-0.26369
	Abcf3	-0.0650592	-0.209639
	Abcg3	0.28821	-0.399512
	Abhd10	0.0221383	-0.232687
	Abhd11	-0.0261303	-0.397577
	Abhd12	0.00505878	-0.405008
	Abhd13	0.0114382	-0.535097
	Abhd14b	-0.0766786	-0.213557
	Abhd15	0.0386021	-0.282929
	Abhd16a	0.090176	-0.0708404
	Abhd17a	0.0687174	-1.13566
	Abhd17b	0.125143	-0.615161
	Abhd5	-0.19922	-0.459362
	Abhd6	-0.163395	-0.550003
	Abi1	0.00430549	-0.103761
	Abi3	-0.059176	-0.308173
	Abitram	0.00968673	-0.251292
	Ablim1	0.0241634	-0.176232
	Abr	-0.200119	-0.395612
	Abracl	0.0323107	-0.869929
	Abraxas1	0.0455	-0.969786
	Abraxas2	-0.0779875	-0.142786
	Abt1	0.0437182	-0.0295809
	Acaa1a	0.00510773	-0.148157
	Acaa2	0.240205	-0.12697
	Acaca	-0.0738028	-0.281306
	Acad10	0.154814	-0.28982
	Acad11	-0.149161	-0.309225
	Acad8	-0.104856	0.175138
	Acad9	-0.0095256	-0.112537
	Acadl	-0.0299167	-0.303333
	Acadm	0.0964919	-0.0083119
	Acads	0.0119509	-0.107839
	Acadsb	0.0335899	-0.0775967
	Acadvl	0.0759745	-0.11039
	Acap1	-0.176764	-0.293231
	Acap2	0.00974826	-0.308688
	Acat1	-0.0091262	-0.226846
	Acat2	0.00910349	-0.300429
	Acbd3	-0.0713074	-0.136223
	Acbd5	-0.0789042	-0.061893
	Acbd6	0.0281956	-0.502066
	Acd	-0.102543	-0.363622
	Acin1	-0.0439048	-0.124461
	Acly	-0.0175002	-0.357082
	Aco1	-0.0802419	-0.355868
	Aco2	0.0361224	-0.151232
	Acot11	-0.227526	-0.611533
	Acot13	-0.0333061	-0.215812
	Acot2	-0.0484235	-0.346082
	Acot7	-0.0958433	-0.388438
	Acot8	-0.114474	-0.232065
	Acot9	-0.0579569	-0.298764
	Acox3	-0.146849	0.15622
	Acp1	0.00612888	-0.304044
	Acpp	-0.850396	-1.91199
	Acp5	-0.0987266	-0.487847
	Acp6	-0.218936	-0.0317419
	Acsf2	0.100791	-0.0660178
	Acsf3	0.14615	-0.150968
	Acsl1	-0.0341515	-0.245454
	Acsl3	0.0341935	-0.306839
	Acsl4	-0.091564	-0.514656
	Acsl5	0.0279035	-0.298612
	Acss1	0.601411	0.462362
	Acss2	-0.186168	-0.526779
	Actb	-0.144893	-0.550574
	Actg1	-0.143779	-0.510494
	Actl6a	0.0525884	-0.10529
	Actn1	-0.12607	-0.334869
	Actn4	0.016609	-0.307365
	Actr10	-0.0323832	-0.370042
	Actr1a	-0.0214537	-0.148562
	Actr1b	-0.054572	-0.318326
	Actr2	-0.0132565	-0.221236
	Actr3	0.0615528	-0.274759
	Actr5	-0.0783316	-0.213301
	Actr6	0.0165718	-0.254441
	Actr8	-0.0443153	-0.350665
	Acvrl1	-1.02899	-0.603743
	Acy1	-0.15981	-0.342688
	Acyp1	-0.0004962	-0.0734721
	Ada	0.163976	-0.179093
	Adam10	0.0574143	-0.200602
	Adam17	-0.0121288	-0.442752
	Adam19	-0.120726	-0.374471
	Adam8	-0.395023	-0.972393
	Adap1	-0.0886399	-0.307723
	Adar	-0.0790299	-0.309602
	Adat1	-0.323707	-0.125218
	Adat2	0.0701947	-2.43332
	Adck1	-0.0743492	-0.721255
	Adck5	-0.0556479	-0.17301
	Adcy3	-0.0465415	-1.58481
	Adcy7	-0.175994	-0.56732
	Add1	0.0206422	-0.102251
	Add3	0.173763	-0.00807
	Adgre5	0.489429	0.268333
	Adh5	0.0852542	-0.151477
	Adi1	0.160852	-0.218337
	Adk	0.0511005	-0.122123
	Adnp	-0.359593	-0.0206839
	Adnp2	0.033662	-0.0910163
	Ado	0.0153886	-0.0585762
	Adpgk	-0.12111	-0.30628
	Adprh	0.103353	-0.0173597
	Adprm	0.0555163	-0.482515
	Adprs	0.012913	-0.0765266
	Adrm1	-0.106152	-0.233834
	Adsl	0.0687108	-0.316188
	Adssl1	-0.138864	-0.585836
	Adss	0.124726	-0.0526677
	Aebp2	0.0325517	-0.163833
	Aen	-0.0726442	-0.510131
	Afdn	0.234208	0.461403
	Afg3l1	-0.0628285	-0.336108
	Afg3l2	-0.0971712	-0.249988
	Afmid	-0.153684	-0.153414
	Aftph	-0.0826008	1.11012
	Aga	-0.0433128	-0.272
	Agap2	-0.07589	-0.234651
	Agap3	0.0412708	-0.718119
	Agfg1	0.104799	-0.143832
	Agfg2	-0.058071	-0.274413
	Aggf1	-0.0329233	-0.043591
	Agk	0.0266888	-0.211967
	Agl	-0.14913	-0.829407
	Ago1	-0.157625	-0.292208
	Ago2	-0.075403	-0.34795
	Agpat1	-0.114438	-0.0804927
	Agpat3	-0.0487657	-0.435371
	Agpat4	-0.370004	-0.997832
	Agpat5	-0.0582755	-0.328639
	Agps	-0.0263001	-0.241391
	Ahctf1	0.0391437	-0.134863
	Ahcy	0.0512404	-0.219568
	Ahcyl1	0.0033375	-0.0151455
	Ahcyl2	0.101134	-0.11532
	Ahdc1	-0.219489	-0.199329
	Ahnak	-0.0566224	-0.309391
	Ahsa1	0.0242623	-0.170661
	Ahsa2	-0.153528	-0.184357
	Aida	0.146829	-0.919911
	Aifm1	-0.0096529	-0.159432
	Aim2	-0.170693	-0.735389
	Aimp1	0.0531698	-0.239328
	Aimp2	0.0412954	-0.287368
	Aip	0.074623	-0.247058
	Ak2	0.1668	0.00349669
	Ak3	-0.0481892	-0.0597644
	Ak4	-0.294868	-0.291852
	Ak6	-0.007019	-0.159237
	Akap1	0.101915	-0.538529
	Akap10	-0.144083	-1.24448
	Akap11	0.00253421	-0.216912
	Akap13	-0.032008	-0.100496
	Akap8	-0.0562813	-0.0930481
	Akap8l	-0.0493512	0.249974
	Akna	-0.098741	-0.249108
	Akr1a1	0.107402	-0.254985
	Akr1b3	0.0506482	-0.263933
	Akr1b10	-0.0488863	-0.0056663
	Akr1c13	0.401357	0.0756629
	Akr1e1	0.246652	0.0710377
	Akr7a5	-0.109514	-0.139398
	Akt1	-0.0115606	-0.186538
	Akt1s1	-0.0182773	-0.288941
	Akt2	-0.0854497	-0.394173
	Aktip	0.0238327	-1.09528
	Alad	-0.210584	-0.718631
	Alcam	-0.212212	-0.459847
	Aldh16a1	0.0946856	-0.12832
	Aldh18a1	-0.114354	-0.364103
	Aldh1b1	-0.210496	-0.0943891
	Aldh2	0.906458	-0.44025
	Aldh3a2	-0.0016916	-0.191141
	Aldh4a1	0.042778	-0.0216859
	Aldh7a1	-0.174459	-0.394307
	Aldh9a1	0.0676267	-0.154514
	Aldoa	-0.043001	-0.375381
	Aldoc	0.0270831	-0.301513
	Alg1	-0.191242	0.0662918
	Alg10b	0.0125708	-0.386171
	Alg11	-0.0882576	-0.334736
	Alg2	-0.229104	-0.431939
	Alg3	-0.112915	-0.53109
	Alg5	0.0613668	-0.286798
	Alg8	-0.0104929	-0.24355
	Alg9	-0.179954	-0.161527
	Alkbh3	-0.105997	-0.325524
	Alkbh5	0.0129664	-0.241618
	Alkbh6	-0.285656	-0.254558
	Alkbh8	-0.0295058	-0.436072
	Alyref	0.123429	0.0350818
	Ambra1	0.0124598	-0.22676
	Amdhd2	-0.0963776	-0.192497
	Amfr	-0.0409894	-0.296695
	Ammecr1l	-0.110457	-0.324897
	Ampd2	-0.120185	-0.141505
	Anapc1	-0.0323523	-0.240283
	Anapc11	0.0941453	-0.297346
	Anapc2	0.0613583	-0.274761
	Anapc4	-0.0291394	-0.341232
	Anapc5	0.0480309	-0.0761928
	Anapc7	0.0296607	-0.253826
	Angel2	0.0316184	-0.227942
	Ankfy1	-0.0121092	-0.571146
	Ankhd1	-0.0389378	-0.411155
	Ankle2	0.0207247	-0.262114
	Ankmy2	0.048787	-0.420053
	Ankrd10	0.0454094	-0.177644
	Ankrd11	-0.0702067	-0.247185
	Ankrd13a	-0.0254969	-0.370103
	Ankrd17	-0.0143834	-0.473249
	Ankrd28	0.0810412	-0.311169
	Ankrd44	-0.0114014	-0.326436
	Ankrd46	0.104731	-0.100306
	Ankrd49	-0.0834433	-0.229863
	Ankrd52	-0.130637	-0.522639
	Ankrd54	-0.117337	-0.194845
	Anks1	-0.191461	-0.414412
	Ankzf1	-0.321986	-0.0494363
	Anln	0.110438	-0.300546
	Ano10	-0.0213212	-0.391493
	Ano6	0.00340233	-0.248364
	Anp32a	0.185864	-0.0068148
	Anp32b	0.0857132	-0.0998423
	Anp32e	0.178498	-0.153208
	Antkmt	-0.048138	-0.0918648
	Anxa1	-0.255269	-1.06467
	Anxa11	0.0293966	-0.219241
	Anxa2	-0.087071	-0.502952
	Anxa4	-0.157793	-0.213775
	Anxa5	-0.301502	-0.754232
	Anxa6	0.0702345	-0.279648
	Anxa7	-0.0718171	-0.440217
	Ap1b1	-0.0335792	-0.270686
	Ap1g1	-0.0589664	-0.310347
	Ap1g2	-0.12908	0.0391472
	Ap1m1	0.108305	-0.107256
	Ap1s1	0.114732	-0.188924
	Ap1s2	0.0793737	0.00068484
	Ap1s3	0.016058	-0.428691
	Ap2a1	-0.0713893	-0.332386
	Ap2a2	-0.12405	-0.444578
	Ap2b1	-0.0208451	-0.276572
	Ap2m1	0.0484908	-0.34399
	Ap2s1	0.0271001	-0.22916
	Ap3b1	0.102812	-0.3826
	Ap3d1	-0.118799	-0.39839
	Ap3m1	-0.11722	-0.629417
	Ap3s1	0.0351853	-0.41771
	Ap4b1	-0.289264	-1.01789
	Ap4e1	-0.0673544	-0.262576
	Ap4m1	-0.0174581	-0.325244
	Ap4s1	-0.0796486	-0.400787
	Ap5b1	0.0510238	0.280885
	Ap5m1	-0.0208293	-0.457112
	Ap5z1	-0.307755	-0.357363
	Apaf1	-0.005886	-0.339823
	Apbb1ip	-0.0742408	-0.36143
	Apeh	-0.0530434	-0.291198
	Apex1	0.0532751	-0.248862
	Api5	0.0948486	-0.183811
	Apip	-0.106358	-0.336163
	Apmap	0.011089	-0.393199
	Apobec3	0.0221887	-0.257755
	Apobr	-0.470547	-0.585357
	Apoo	0.178686	-0.270888
	Apool	0.169238	0.0532186
	Appbp2	0.010517	-0.743938
	Appl1	0.0780828	-0.0831862
	Appl2	-0.184101	-0.785161
	Aprt	-0.0661605	-0.426901
	Aptx	0.0852393	-0.144637
	Aqr	0.034217	-0.286532
	Araf	-0.164102	-0.358936
	Arap1	-0.381581	-0.360028
	Arap2	0.120242	-0.349922
	Arcn1	-0.0070468	-0.320271
	Arf1	-0.0359453	-0.355254
	Arf4	0.0887336	-0.248039
	Arf5	0.0800613	-0.158298
	Arf6	-0.0656911	-0.370117
	Arfgap1	-0.165642	-0.212969
	Arfgap2	0.0614186	-0.231899
	Arfgap3	-0.188012	-0.476932
	Arfgef1	0.0092352	-0.48927
	Arfgef2	0.0284681	-0.43406
	Arfgef3	-0.279061	-0.749631
	Arfip1	-0.100425	-0.294737
	Arfip2	-0.0634476	-0.279562
	Arfrp1	-0.109194	-0.23518
	Arglu1	-0.161788	-0.223018
	Arhgap1	-0.0490122	-0.291343
	Arhgap11a	0.0687493	-0.0486809
	Arhgap12	-0.0200678	-0.288725
	Arhgap15	0.240956	0.115572
	Arhgap17	-0.245014	-0.377333
	Arhgap18	-0.117416	-0.381602
	Arhgap19	0.129594	0.139426
	Arhgap21	-0.0769481	-0.303497
	Arhgap25	0.227348	-0.0416042
	Arhgap26	0.0952624	-0.0789771
	Arhgap27	-0.0512242	-0.0734802
	Arhgap30	-0.0549847	-0.180041
	Arhgap4	-0.067098	-0.292301
	Arhgap45	-0.133541	-0.19258
	Arhgap9	-0.066587	-0.183324
	Arhgdia	-0.0153944	-0.208252
	Arhgdib	0.0402917	-0.125913
	Arhgef18	0.225978	-0.202575
	Arhgef2	-0.207176	-0.346806
	Arhgef6	-0.0533209	-0.276281
	Arhgef7	-0.208025	-0.239267
	Arid1a	-0.0421418	0.319824
	Arid1b	0.136852	-0.0761926
	Arid2	-0.0242611	0.150954
	Arid3a	-0.0225703	-0.318238
	Arid4a	0.100337	-0.101402
	Arid4b	0.055218	0.00669408
	Arid5a	0.0787623	0.00788375
	Arih1	0.0315069	-0.287743
	Arih2	0.0156594	-0.306386
	Arl1	0.104093	-0.553647
	Arl14ep	-0.0931887	-0.33966
	Arl2	0.0185369	-0.48962
	Arl2bp	0.0853536	-0.0494752
	Arl3	0.0497152	-0.324702
	Arl4c	0.0535616	-0.625384
	Arl5a	0.130052	-0.384303
	Arl6	-0.0755553	-0.456847
	Arl6ip1	0.138601	-0.228644
	Arl6ip4	-0.0283584	-0.130954
	Arl6ip5	0.034472	-0.310526
	Arl6ip6	0.00809956	0.12715
	Arl8a	-0.0391662	-0.49056
	Arl8b	0.0556606	-0.351934
	Armc1	0.076195	-0.0835154
	Armc10	0.143299	-0.113479
	Armc6	-0.0089848	-0.431906
	Armc8	-0.0085073	-0.266121
	Armh3	0.00357173	-0.310323
	Armt1	0.0176318	-0.43807
	Arnt	0.0048167	-0.316382
	Arpc1a	0.0155985	-0.182033
	Arpc1b	-0.016986	-0.372183
	Arpc2	0.0258254	-0.27869
	Arpc3	-0.0125752	-0.317981
	Arpc4	0.0253959	-0.237802
	Arpc5	0.042965	-0.205295
	Arpc5l	-0.102521	-0.29647
	Arpp19	0.0342948	-0.24388
	Arrb1	0.14012	-0.581538
	Arrb2	-0.0378115	-0.336121
	Arrdc1	0.0282906	-0.373567
	Arsb	0.054525	-0.31652
	Asah1	-0.0325852	-0.545159
	Asap1	0.227714	0.354255
	Asb2	0.176903	-0.417233
	Asb3	0.108974	-0.762779
	Asb6	0.0492242	-0.59306
	Ascc1	0.139369	-0.340777
	Ascc2	-0.0498705	-0.396148
	Ascc3	-0.091377	-0.595819
	Asf1a	0.248481	-0.0859142
	Asf1b	0.200784	0.0777062
	Ash2l	0.0770128	-0.0799636
	Asl	-0.171923	-0.624649
	Asns	-0.268883	-0.793433
	Aspm	0.208808	-0.639556
	Aspscr1	-0.0062514	-0.116506
	Asrgl1	0.246978	-0.067338
	Ass1	-0.0809663	-0.258635
	Asxl2	0.014862	-0.447614
	Atad1	0.0527353	-0.325254
	Atad2	0.0788378	-0.106053
	Atad2b	0.0703664	-0.0315707
	Atad3a	-0.0869311	-0.129978
	Atad5	0.00033588	-0.0814894
	Ate1	0.0233846	-0.241547
	Atf2	0.113749	-0.0831346
	Atf7	-0.0412927	-0.247447
	Atf7ip	-0.127816	-0.225602
	Atg101	0.125969	0.153463
	Atg12	0.0886533	-0.327802
	Atg13	0.109875	-0.588669
	Atg16l1	-0.112986	-0.0895556
	Atg16l2	-0.0941233	-0.729017
	Atg2a	-0.0361793	-0.663708
	Atg2b	-0.148462	-0.462386
	Atg3	-0.0141308	-0.326156
	Atg4a	-0.0068878	-0.343653
	Atg4b	-0.0027871	-0.381358
	Atg5	0.0531425	-0.167197
	Atg7	-0.075651	-0.331286
	Atic	0.118791	-0.0326013
	Atl2	0.0694267	-0.138636
	Atl3	0.0785981	-0.20183
	Atm	0.0148488	-0.333774
	Atn1	0.134036	0.047271
	Atox1	-0.0151765	-0.426486
	Atp10a	-0.0027482	-0.425091
	Atp11b	0.056882	-0.339469
	Atp11c	0.0770108	-0.15175
	Atp13a1	-0.198134	-0.301758
	Atp13a3	0.0279908	-0.74352
	Atp1a1	0.0129098	-0.205947
	Atp1b3	0.133373	-0.0708411
	Atp2a1	0.187101	-0.836837
	Atp2a2	-0.093269	-0.321486
	Atp2a3	0.0977467	-0.149322
	Atp2b1	0.115201	-0.0584148
	Atp2b4	-0.0794634	-0.174291
	Atp2c1	-0.126236	-0.575274
	Atp5a1	0.0613746	-0.1465
	Atp5b	0.0680987	-0.166529
	Atp5c1	0.0735916	-0.114559
	Atp5d	-0.024782	-0.184448
	Atp5e	0.198364	-0.049311
	Atpif1	0.128347	-0.123209
	Atp5md	0.0489692	-0.0628079
	Atp5k	0.0470719	-0.0494471
	Atp5j2	0.134566	-0.0867873
	Atp5l	-0.0645907	-0.114804
	Atp5pb	0.059923	-0.165075
	Atp5h	0.101508	-0.111383
	Atp5j	0.048948	-0.259518
	Atp5o	0.0660953	-0.206907
	Atp6ap1	-0.0571071	-0.441475
	Atp6ap2	0.108301	-0.312609
	Atp6v0a1	-0.646386	-1.49693
	Atp6v0a2	-0.138739	-0.413492
	Atp6v0d1	-0.0206225	-0.300417
	Atp6v1a	-0.063211	-0.493633
	Atp6v1b2	-0.0789204	-0.423147
	Atp6v1c1	0.0312619	-0.489358
	Atp6v1d	0.0310826	-0.350601
	Atp6v1e1	-0.0391925	-0.318341
	Atp6v1f	0.0508043	-0.48913
	Atp6v1g1	0.0396797	-0.329056
	Atp6v1h	0.0978839	-0.180597
	Atp8b2	-0.126173	0.283
	Atp8b4	-0.114838	0.187607
	Atpaf1	0.054338	0.0189853
	Atpaf2	-0.0373721	-0.0308767
	Atr	-0.0770985	-0.548906
	Atrip	-0.0576479	-0.570635
	Atrx	-0.0515245	-0.266139
	Atxn1	-0.225338	-0.16586
	Atxn10	0.0389439	-0.367727
	Atxn2	-0.107233	0.580282
	Atxn2l	-0.12133	-0.210412
	Atxn3	0.0771292	0.22047
	Atxn7l3	0.0321322	-0.270871
	Auh	-0.101363	-0.17044
	Aup1	-0.0530848	-0.158673
	Aurka	0.0383775	-0.252295
	Aurkb	0.107028	0.434151
	Aven	0.0468281	-0.220714
	Avil	-1.58332	-1.58726
	Avl9	-0.0062673	-0.198209
	B2m	0.00962644	-0.308658
	B3galt6	0.135554	-0.501366
	B3gat3	-0.0717877	-0.840611
	B4galnt1	-0.0049583	-0.103262
	B4galt1	0.0153591	-0.514636
	B4galt5	-0.190372	-0.38447
	B4galt7	0.0256495	-0.116748
	Babam1	0.0627204	-0.143195
	Babam2	-0.0857017	-0.229011
	Bach2	0.167259	-0.53051
	Bag1	0.0246185	-0.0818964
	Bag2	0.040044	-0.0008775
	Bag4	0.0077582	-0.310784
	Bag5	0.102628	-0.537188
	Bag6	-0.0246465	-0.2933
	Baiap2	-0.091959	-0.371686
	Bak1	-0.0630264	-0.448019
	Banf1	0.0459166	-0.472091
	Banp	0.0902399	0.016721
	0610010K14Rik	-0.335783	-0.0947533
	Bard1	0.0493992	0.0370669
	Basp1	-0.609025	-0.579944
	Bax	0.0792704	-0.0417913
	Baz1a	-0.066026	-0.297044
	Baz1b	0.0507679	-0.0481408
	Baz2a	-0.130797	-0.0459829
	Bcap29	-0.0017256	-0.37148
	Bcap31	0.0708466	-0.223928
	Bcas2	0.0166853	-0.184675
	Bcas3	-0.039528	-0.0309736
	Bcat1	-0.0847477	-0.495478
	Bcat2	0.00060235	-0.192757
	Bccip	-0.0120302	-0.2424
	Bckdha	0.233967	0.0967969
	Bckdhb	-0.327705	0.254717
	Bckdk	0.0950714	-0.237284
	Bcl10	0.0622948	-0.235796
	Bcl11b	0.00151204	0.309915
	Bcl2	0.118235	-0.402219
	Bcl2l1	-0.122434	-0.294389
	Bcl2l11	0.0950258	0.0478528
	Bcl2l13	-0.0047296	-0.237331
	Bcl7b	0.0466549	-0.033551
	Bcl7c	0.0604147	-0.0545277
	Bclaf1	-0.0280954	-0.0502914
	Bcor	0.0870799	-0.713886
	Bcr	-0.516638	-0.661329
	Bcs1l	-0.237972	-0.162268
	Bdh1	0.0209305	-0.145714
	Becn1	-0.0607049	-0.52657
	Bend3	0.0472598	0.0973633
	Bet1	-0.0141308	0.756457
	Bhlhe40	-0.231934	-0.437244
	Bicd2	-0.0552276	-0.397249
	Bicra	-0.157763	0.974162
	Bid	-0.0178807	-0.108845
	Bin1	-0.130011	-0.298627
	Bin2	0.0661206	-0.233094
	Birc2	-0.0950195	0.094509
	Birc5	0.119648	-0.128377
	Birc6	-0.0674146	-0.385943
	AI837181	-0.0186804	-0.0701706
	Blm	-0.0215549	-0.434736
	Blmh	0.122357	-0.238174
	Bloc1s1	0.395823	0.0674848
	Bloc1s3	0.0265869	-0.389707
	Bloc1s4	-0.049781	-0.392147
	Bloc1s5	0.053671	0.136455
	Bloc1s6	0.0164121	-0.548837
	Blvra	0.035661	-0.343296
	Blvrb	-0.1671	-0.32835
	Bmp2k	0.0470234	-0.123441
	Bms1	-0.0759578	-0.191646
	Bnip1	0.0256393	-0.680736
	Bnip2	-0.100871	-0.583468
	Bnip3	-0.0938222	-0.154351
	Bod1l	-0.0526308	0.0691902
	Bola1	-0.151993	-0.152947
	Bola2	-0.0114589	-0.508352
	Bola3	0.072132	-0.559041
	Bop1	-0.0536869	-0.0737597
	Bora	-0.0644027	-0.216729
	Borcs5	-0.126736	-0.0727989
	Bphl	0.190454	-0.172464
	Bpnt1	0.00606625	-0.130555
	Bpnt2	0.00984067	-0.0193738
	Bptf	-0.0213303	-0.364509
	Brap	0.0319656	-0.155358
	Brat1	-0.130666	-0.453991
	Brca1	0.116234	-0.126831
	Brcc3	0.0223378	-0.162867
	Brd1	0.0487849	-0.154188
	Brd2	0.0645138	-0.0349217
	Brd3	0.16675	0.0866139
	Brd4	-0.0596307	0.0500779
	Brd7	-0.0280696	0.146231
	Brd8	-0.0458806	0.0981351
	Brd9	0.029738	0.0434155
	Brf1	-0.180774	0.557541
	Bri3bp	0.0013967	-0.162886
	Brip1	0.12217	-0.204735
	Brix1	0.0342953	-0.07996
	Brms1l	0.139694	-0.356548
	Brox	0.0747262	-0.190416
	Brpf1	-0.0473306	-0.282561
	Brwd1	-0.199304	-0.491732
	Bscl2	-0.113435	-0.830519
	Bsdc1	-0.105802	1.4561
	Bsg	-0.0446334	-0.430969
	Bspry	-0.163099	-0.424726
	Bst2	0.106442	-0.343981
	Btaf1	0.0948978	-0.347459
	Btbd1	0.0276338	-0.0818619
	Btd	-0.005399	-0.244511
	Btf3	0.0467191	-0.0791004
	Btf3l4	-0.0112207	0.0133358
	Bub1	0.0900039	0.246141
	Bub1b	0.126691	-0.0560925
	Bub3	0.0462371	-0.106937
	Bud13	0.0385063	-0.0062131
	Bud23	-0.0404505	-0.164585
	Bud31	-0.0057968	-0.405209
	Bysl	-0.034172	-0.274839
	Bzw1	0.077018	-0.254881
	Bzw2	0.118769	-0.203444
	C1d	0.103013	-0.440898
	C1galt1	-0.0735962	-0.354593
	C1galt1c1	-0.0505967	-0.447346
	C1qbp	0.0529263	-0.0978363
	C2cd2l	-0.140004	-0.578814
	C2cd5	0.0373107	-0.206891
	Car2	-1.51438	0.128161
	Caap1	0.0524864	-0.0668806
	Cab39	-0.020307	-0.309854
	Cab39l	0.00687586	-0.364312
	Cactin	-0.0463187	-0.595982
	Cacul1	0.076321	-0.163382
	Cacybp	0.0901468	-0.490051
	Cad	-0.0694455	-0.218673
	Calhm2	0.0156316	-0.121586
	Calhm6	0.309867	-0.527744
	Calm1	0.0629427	-0.373998
	Calr	-0.113897	-0.445207
	Calu	-0.0543821	-0.155479
	Camk1d	0.286434	0.208037
	Camk2d	0.252175	-0.0859359
	Camk2g	-0.102546	-0.141396
	Camk4	-0.0086517	-0.258151
	Cand1	0.0217489	-0.293685
	Cand2	-0.0332672	-0.432458
	Canx	-0.0021843	-0.21503
	Cap1	0.00120539	-0.316213
	Capg	-0.16696	-0.492538
	Capn1	-0.0152683	-0.202855
	Capn2	-0.237637	-0.556219
	Capn7	-0.0574997	-0.507977
	Capns1	-0.0101515	-0.41323
	Caprin1	0.0425961	-0.219822
	Capza1	0.0142289	-0.239933
	Capza2	0.0296468	-0.272451
	Capzb	-0.0303021	-0.25989
	Card11	-0.104768	-0.261499
	Card19	-0.218185	-0.47563
	Card6	0.326861	0.811379
	Carhsp1	0.113983	-0.562545
	Carm1	-0.0046203	-0.0618607
	Carmil2	0.106249	-0.243803
	Carnmt1	0.017875	-0.263593
	Cars	-0.143835	-0.477144
	Cars2	-0.0810285	-0.126754
	Casc3	0.0231912	0.00934411
	Casp1	0.0256999	-0.253128
	Casp2	0.210006	-0.0133152
	Casp3	-0.0502774	-0.516834
	Casp6	0.251194	-0.241806
	Casp7	0.261868	-0.368713
	Casp8	-0.0712114	-0.334963
	Casp8ap2	0.0547268	-0.335996
	Casp9	-0.235583	-0.304059
	Cast	-0.0225247	-0.329339
	Cat	0.0881947	-0.130509
	Cbl	-0.0828854	-0.1542
	Cblb	-0.196348	-0.481431
	Cbll1	0.0408055	0.0895038
	Cbr1	-0.179102	-0.393799
	Cbr4	-0.179401	-0.0787354
	Cbwd1	-0.089917	-0.123848
	Cbx1	0.0471974	-0.144646
	Cbx3	0.132915	0.0183121
	Cbx4	0.00155826	-0.118433
	Cbx5	0.0365313	0.0345768
	Cbx8	0.0495019	0.00211748
	Cc2d1a	-0.125999	-0.374382
	Cc2d1b	0.0898655	-0.0913011
	Ccar1	-0.0803676	-0.15356
	Ccar2	-0.196354	-0.152289
	Ccdc102a	0.0247342	-0.266979
	Ccdc115	0.0178002	-0.445822
	Ccdc12	-0.0054565	-0.0526641
	Ccdc124	-0.0041067	-0.252623
	Ccdc127	0.0544957	-0.447481
	Ccdc134	-0.317563	-0.293869
	Ccdc137	-0.0664524	0.0684161
	Ccdc167	0.0249718	-0.254839
	Ccdc174	-0.0370411	-0.126683
	Ccdc22	0.28366	-0.192233
	Ccdc25	-0.0537068	-0.348914
	Ccdc43	-0.0288914	-0.579974
	Ccdc47	-0.0317995	-0.274771
	Ccdc50	0.106909	-0.0485537
	Ccdc51	-0.0614215	-0.317322
	Ccdc58	-0.125465	-0.109342
	Ccdc6	-0.0962385	-0.27339
	Ccdc61	-0.0709285	-0.106261
	Ccdc69	-0.148992	-0.0816712
	Ccdc85c	0.157388	0.100077
	Ccdc86	-0.050033	-0.256332
	Ccdc88b	-0.127495	-0.263484
	Ccdc88c	-0.124577	-0.376165
	Ccdc9	-0.0587556	-0.0324637
	Ccdc92	0.376048	-0.661639
	Ccdc93	-0.0746572	-0.13056
	Ccdc97	-0.046049	-0.416123
	Ccl1	-0.209793	-0.127476
	Ccl4	-0.20432	-0.898206
	Ccm2	0.0127284	0.153059
	Ccna2	0.155569	-0.154936
	Ccnb1	0.100964	-0.158244
	Ccnb2	0.172116	-0.185927
	Ccnc	0.0626962	-0.680025
	Ccnd2	0.0133814	-0.641279
	Ccnd3	0.0608563	-0.958803
	Ccndbp1	0.0433293	-0.0192677
	Ccne1	0.0570985	-0.507581
	Ccnh	0.132749	-0.613775
	Ccnk	-0.0290312	0.0871221
	Ccnl1	-0.136292	-0.0400883
	Ccnl2	-0.348144	-0.319006
	Ccnt1	-0.0381618	-0.188467
	Ccnt2	-0.123015	0.240551
	Ccny	-0.0720116	-0.401601
	Ccr5	-0.0549406	-0.745624
	Ccs	-0.0339579	-0.155421
	Cct2	0.0329161	-0.265279
	Cct3	0.0735687	-0.257245
	Cct4	0.0578152	-0.259609
	Cct5	0.0898612	-0.266993
	Cct6a	0.0806948	-0.207818
	Cct7	0.0196695	-0.29525
	Cct8	0.0361169	-0.231806
	Ccz1	-0.0016188	0.452165
	Cd160	0.0770587	-0.307342
	Cd2	0.213907	-0.0209666
	Cd226	0.198204	-0.294992
	Cd244a	-0.43667	-0.87581
	Cd247	0.00628724	-0.300426
	Cd27	0.627894	1.11147
	Cd28	0.00951163	-0.245182
	Cd2ap	0.0747295	-0.0941292
	Cd2bp2	-0.0467109	-0.0245048
	Cd37	-0.107325	-0.257181
	Cd3d	0.0979236	-0.134576
	Cd3e	0.109713	-0.225739
	Cd3g	0.130946	-0.250303
	Cd44	0.0605247	-0.195661
	Cd48	0.14729	-0.0559241
	Cd5	0.368044	-0.0064807
	Cd6	0.141514	0.256361
	Cd69	-0.0695872	-0.670223
	Cd82	-0.0289757	-0.0357677
	Cd84	0.0863663	-0.214777
	Cd8a	-0.0089907	-0.256432
	Cd8b1	0.155337	-0.145962
	Cd96	0.0512152	-0.301839
	Cdan1	0.00950822	-0.157313
	Cdc123	0.0493729	-0.377412
	Cdc16	0.0023669	-0.257877
	Cdc20	0.166436	-0.0172809
	Cdc23	-0.0477067	-0.263053
	Cdc26	0.0674462	-0.262392
	Cdc27	0.00422539	-0.383156
	Cdc34	0.038107	-0.34605
	Cdc37	0.0536106	-0.0440424
	Cdc37l1	-0.118477	-0.427693
	Cdc40	0.130504	3.09e-05
	Cdc42	0.0557559	-0.328775
	Cdc42se2	0.0361633	-0.266725
	Cdc45	-0.0212935	-0.250243
	Cdc5l	0.170984	-0.107695
	Cdc73	0.00468433	-0.0962953
	Cdca2	0.043851	0.209127
	Cdca3	0.140446	-0.161035
	Cdca5	0.199269	0.409693
	Cdca7	0.183886	1.03832
	Cdca7l	0.29114	0.212294
	Cdca8	0.159254	0.105581
	Cdh1	-0.238563	-0.656929
	Cdipt	-0.100832	-0.302177
	Cdk1	0.0911622	-0.105338
	Cdk11b	-0.110374	-0.126103
	Cdk12	-0.043538	-0.533658
	Cdk13	0.0293425	-0.18675
	Cdk17	0.0117322	-0.215227
	Cdk19	0.246075	-0.581165
	Cdk2	0.105415	-0.116013
	Cdk2ap1	-0.0799404	-0.448342
	Cdk4	0.145074	-0.0887973
	Cdk5	0.0152152	-0.128076
	Cdk5rap1	-0.157204	-0.373142
	Cdk5rap2	-0.106112	-0.548471
	Cdk5rap3	0.02864	-0.426977
	Cdk6	0.00841969	0.0503279
	Cdk7	-0.0159072	-0.208651
	Cdk9	-0.0656481	-0.325798
	Cdkal1	0.0213399	-0.540027
	Cdkn1a	0.0343976	-0.69692
	Cdkn1b	0.195478	0.310949
	Cdkn2a	0.105067	-1.08554
	Cdkn2aip	0.114897	0.0108097
	Cdkn2b	-0.0332296	-0.753957
	Cdkn2d	0.0868469	-0.384572
	Cds2	-0.0630849	-0.391499
	Cdv3	-0.0576082	-0.144579
	Cdyl	-0.149906	-0.500537
	Cdyl2	-0.229544	-0.366475
	Cebpz	0.00774259	-0.279895
	Cebpzos	0.104562	-0.116592
	Celf1	0.0354801	-0.157345
	Celf2	0.0168384	-0.132818
	Cemip2	-0.255178	-1.06427
	Cenpa	0.00960874	-1.70635
	Cenpc1	0.0379312	0.074661
	Cenpe	-0.0281592	-0.210116
	Cenpf	0.124143	-0.178697
	Cenph	0.146103	-0.566418
	Cenpi	0.0967859	-0.142065
	Cenpk	0.247343	-0.377296
	Cenpl	0.195901	0.447683
	Cenpm	0.087373	0.260932
	Cenpp	0.130203	0.453322
	Cenpq	0.18113	-1.08774
	Cenps	0.146473	0.241539
	Cenpt	-0.0705209	-0.296166
	Cenpu	-0.0448814	-0.156248
	Cenpv	0.141978	-0.21922
	Cep120	0.0123066	-0.355768
	Cep128	0.103207	-1.69683
	Cep131	0.109146	0.669406
	Cep135	-0.0022874	-0.431172
	Cep152	0.0187749	-0.2401
	Cep170	-0.031701	-0.267105
	Cep192	-0.0230195	-0.994912
	Cep250	-0.159018	-0.446986
	Cep41	-0.148132	-0.280322
	Cep43	0.0664234	-0.100294
	Cep55	0.0873014	-0.109991
	Cep57	0.0974561	-0.15115
	Cep63	0.0813282	-0.0250803
	Cep76	0.0520082	-0.405841
	Cep85	-0.117823	-0.221288
	Cep97	0.0910875	-0.143799
	Cept1	0.0581344	-0.0954565
	Cers2	-0.131569	-0.42898
	Cers4	0.0654091	-0.1732
	Cers5	0.0530174	-0.681725
	Cert1	-0.0861727	-0.209937
	Cetn2	0.0802999	-0.22303
	Cetn3	0.0594746	-0.103871
	Cfap20	0.125788	-0.170564
	Cfap36	0.0009423	-0.396685
	Cfdp1	0.0527607	-0.0193934
	Cfl1	0.059397	-0.233789
	Cfp	-0.896456	-1.39831
	Cgas	0.0716165	-0.030165
	Cggbp1	0.0526696	-0.0011767
	Chaf1a	0.0615008	-0.211647
	Chaf1b	0.0409163	0.203649
	Champ1	0.0644471	-0.0529579
	Chchd1	0.105376	0.00868311
	Chchd3	0.0492091	-0.134082
	Chchd4	-0.0441973	-0.575867
	Chchd6	0.0266108	0.0426407
	Chd1	0.00601624	-0.210963
	Chd1l	0.0821323	-0.299191
	Chd2	-0.0262951	-0.372192
	Chd3	-0.0872008	-0.208213
	Chd4	-0.0937222	-0.122526
	Chd7	0.0499542	-1.67721
	Chd8	-0.0516964	-0.167155
	Chek1	0.198771	0.0843288
	Cherp	0.0110491	-0.368499
	Chfr	-0.0241307	-0.458966
	Chid1	-0.163987	-0.182069
	Chm	0.0559801	-0.559322
	Chmp1a	-0.0118186	-0.122492
	Chmp1b	0.0336929	-0.0053603
	Chmp2a	0.0915321	-0.214899
	Chmp2b	0.0200012	-0.0090684
	Chmp3	0.0847941	-0.248978
	Chmp4b	0.00251198	-0.199466
	Chmp5	-0.0376333	-0.372631
	Chmp6	0.0661207	0.0223798
	Chmp7	-0.0801135	-0.474532
	Chordc1	0.0631283	-0.197641
	Chp1	-0.0556166	-0.493447
	Chrac1	0.11368	-0.0578499
	Chst12	-0.215311	1.71522
	Chsy1	-0.120318	0.584392
	Chtf18	0.0523246	-0.208181
	Chtf8	0.1653	-0.222393
	Chtop	0.11983	0.0482566
	Chuk	-0.0737899	-0.457233
	Churc1	-0.097626	-0.14181
	Ciao1	0.154177	-0.36671
	Ciao2a	-0.005762	-0.277453
	Ciao2b	-0.0397093	-0.390874
	Ciao3	-0.0896658	-0.351751
	Ciapin1	-0.0453139	-0.29738
	Cib1	0.140035	-0.589942
	Cic	-0.112892	-0.601116
	Cinp	-0.0741938	-0.213144
	Cip2a	0.149303	-0.0858435
	Cirbp	0.127685	-0.180768
	Cisd1	-0.0602736	-0.358062
	Cisd2	-0.0047509	-0.232363
	Cisd3	-0.192299	-1.19933
	Cish	-0.115363	-0.300373
	Cit	-0.0711541	-0.0367287
	Ciz1	0.0278936	0.38946
	Ckap2	0.0588329	-0.160387
	Ckap2l	0.129096	0.330168
	Ckap5	0.0599274	-0.171999
	Ckb	0.223349	-0.196199
	Cks1b	0.142387	-0.0838016
	Cks2	0.147812	-0.0015747
	Clasp1	-0.0636553	-0.218238
	Clasrp	-0.179646	0.104054
	Clcc1	-0.017568	-0.165539
	Clcn3	0.0265713	-0.273247
	Clcn5	-0.151761	-0.655789
	Cldnd1	0.186032	-0.388972
	Clec2d	-0.0617068	-0.245912
	Clic1	0.0721938	-0.2183
	Clic4	-0.0871295	-0.477672
	Clint1	-0.0095541	-0.0407085
	Clip1	0.0214833	-0.534077
	Clk1	-0.0483391	-0.60818
	Clk3	-0.123359	-0.263784
	Cln5	-0.042968	-0.341287
	Clns1a	0.105198	-0.324151
	Clp1	0.0402779	-0.239809
	Clpb	0.0547475	-0.590887
	Clpp	-0.0504558	-0.130623
	Clptm1	-0.0037769	-0.227991
	Clptm1l	-0.137997	-0.594714
	Clpx	-0.0552243	-0.306409
	Clspn	0.12626	0.126909
	Clta	0.07649	-0.177479
	Cltb	-0.0168945	-0.200274
	Cltc	-0.141821	-0.37733
	Cluh	-0.0785624	-0.278856
	Clybl	0.26971	0.257111
	Cmah	0.38779	2.88474
	Cmas	-0.0865409	-0.363643
	Cmc1	-0.0115366	-0.205192
	Cmc2	-0.0903131	-0.450709
	Cmip	-0.160633	-0.694875
	Cmpk1	-0.0567219	-0.469234
	Cmpk2	0.258624	0.9165
	Cmss1	0.16248	-0.0551942
	Cmtm6	0.0403512	-0.428024
	Cmtm7	-0.0009165	-0.301631
	Cmtr1	-0.264321	-0.224514
	Cnbp	0.0542681	-0.583722
	Cndp2	0.0617045	-0.182201
	Cnep1r1	0.0473374	-0.214108
	Cnn2	0.0089762	-0.213197
	Cnnm3	0.0404193	-0.217883
	Cnot1	-0.0312138	-0.265824
	Cnot10	0.0412281	-0.275928
	Cnot11	0.101402	-0.314694
	Cnot2	-0.0062189	-0.0916842
	Cnot3	-0.085781	-0.158865
	Cnot4	-0.0211613	-0.324162
	Cnot6	0.0205359	-0.228724
	Cnot6l	0.108619	-0.221814
	Cnot7	-0.0477557	-0.289858
	Cnot8	0.116362	-0.284688
	Cnot9	0.125693	-0.355882
	Cnp	0.033692	-0.27162
	Cnpy2	0.0581121	-0.221229
	Cnpy3	-0.0159784	-0.606225
	Cnpy4	0.0153389	-0.317134
	Cnrip1	0.251631	-0.288255
	Cnst	-0.132049	-0.12942
	Cntrl	-0.0347236	-0.378776
	Cntrob	-0.130109	-0.845987
	Coa3	0.102497	-0.117553
	Coa6	0.109297	-0.0365068
	Coa7	0.169901	0.162869
	Coasy	-0.0783194	-0.251467
	Cobll1	0.0985159	-0.235998
	Cog1	-0.154291	-0.0415572
	Cog2	0.0175961	0.0743984
	Cog3	-0.0110052	-0.351406
	Cog4	-0.0607219	-0.136164
	Cog5	0.100378	-0.126078
	Cog6	-0.0894227	-0.135297
	Cog7	-0.0539016	0.120207
	Cog8	0.0750981	-0.29542
	Coil	0.0978391	-0.230502
	Colgalt1	-0.0167875	-0.276763
	Commd1	0.0552731	-0.345028
	Commd10	0.0761582	-0.219398
	Commd2	0.0134685	-0.45014
	Commd3	-0.0061952	-0.672022
	Commd4	-0.0559073	-0.14216
	Commd6	0.0450474	-0.351338
	Commd7	0.00532281	-0.491439
	Commd8	0.0510205	0.333846
	Commd9	0.0550146	-0.401857
	Comt	-0.0733798	-0.409005
	Comtd1	-0.110285	-0.139237
	Copa	-0.0190207	-0.356932
	Copb1	0.00669667	-0.43543
	Copb2	0.0128673	-0.271748
	Cope	-0.0445413	-0.351014
	Copg1	-0.0812474	-0.403236
	Copg2	-0.0164009	-0.479527
	Cops2	0.119437	-0.346217
	Cops3	0.111237	-0.321065
	Cops4	0.0221732	-0.278255
	Cops5	-0.0041133	-0.39201
	Cops6	0.0452857	-0.33118
	Cops7a	0.0414898	-0.153225
	Cops7b	-0.0091606	-0.246821
	Cops8	-0.0007584	-0.181783
	Copz1	-0.0022001	-0.354363
	Coq3	-0.149141	-0.0135551
	Coq5	-0.0759805	-0.212794
	Coq6	-0.141055	0.934413
	Coq7	0.00120783	-0.233832
	Coq9	-0.0415021	-0.169578
	Coro1a	0.150358	-0.111571
	Coro1b	0.108102	-0.20789
	Coro1c	-0.0214066	-0.246972
	Coro2a	0.0611972	-0.0209984
	Coro7	0.187841	0.0908259
	Cotl1	-0.0677668	-0.323656
	Cox15	-0.0705227	-0.229118
	Cox16	-0.0708688	-0.113532
	Cox17	-0.196777	-0.717297
	Cox20	0.0414688	-0.0732677
	Cox4i1	0.0766815	-0.0820617
	Cox5a	0.0735354	-0.2972
	Cox5b	0.0717191	-0.341389
	Cox6a1	0.0727166	-0.451477
	Cox6b1	0.0807123	-0.02591
	Cox6c	0.0984216	0.026485
	Cox7a2	0.0731857	-0.419403
	Cox7a2l	0.12235	-0.217159
	Cox7c	0.0828619	-0.176709
	Cpeb4	-0.322122	-0.988838
	Cpne2	-0.0856981	-0.309654
	Cpne3	0.180895	-0.114886
	Cpox	0.128131	-0.163289
	Cpped1	-0.128281	-0.52671
	Cpsf1	-0.0608907	-0.153314
	Cpsf2	-0.0175871	-0.21681
	Cpsf3	-0.0191586	-0.155901
	Cpsf6	0.03374	-0.110659
	Cpsf7	-0.0278407	-0.132762
	Cpt1a	0.128182	0.0588088
	Cpt2	-0.161303	-0.0516052
	Cr1l	0.0311365	-0.395464
	Cradd	0.321445	-0.0821493
	Crbn	0.0356522	0.0938912
	Crcp	-0.0051419	-1.02799
	Creb1	0.252036	0.112046
	Crebbp	-0.0086997	-0.191009
	Creg1	-0.108238	-0.688486
	Creld2	-0.155976	-0.342423
	Crip1	0.424985	0.141563
	Crip2	0.334397	0.00354996
	Cript	0.0715939	-0.127348
	Crk	0.0599987	-0.266168
	Crkl	0.0243936	-0.192661
	Crlf2	-0.0455374	-0.438318
	Crlf3	0.0684415	-0.266065
	Crmp1	0.202711	-0.0127052
	Crnkl1	0.140996	-0.154249
	Crocc	0.258006	-0.772437
	Crot	0.0122537	-0.4091
	Crtam	0.0352953	-1.18795
	Crtc2	-0.14953	0.184181
	Crtc3	-0.0357707	-0.175713
	Cry1	-0.0350284	-0.678527
	Crybg1	0.0699851	-0.3695
	Cryl1	0.574998	-0.0429068
	Cryz	-0.0930454	-0.078482
	Cryzl1	-0.100643	-0.34807
	Cs	-0.0184099	-0.229035
	Csde1	0.0207758	-0.240007
	Cse1l	0.0238602	-0.166821
	Csk	0.123319	-0.0464219
	Csnk1a1	-0.0182616	-0.301341
	Csnk1d	0.0131561	-0.16379
	Csnk1g1	-0.0442202	-0.363422
	Csnk1g2	-0.0018302	-0.0923421
	Csnk1g3	-0.117511	-0.186553
	Csnk2a1	-0.0498865	-0.296839
	Csnk2a2	-0.0155916	-0.266255
	Csnk2b	-0.0182366	-0.128684
	Csrp1	0.234885	-0.17017
	Cst3	0.139452	-0.180587
	Cst7	0.0687339	0.0319202
	Cstb	-0.0853377	-0.395037
	Cstf1	-0.0415331	-0.190888
	Cstf2	0.0266829	-0.199489
	Cstf2t	0.0384872	-0.143429
	Cstf3	-0.000101	0.121028
	Ctbp1	0.0779507	-0.0895948
	Ctbs	-0.117987	-0.628911
	Ctc1	-0.0337608	-0.183138
	Ctcf	0.0787589	0.00062835
	Ctdp1	0.147236	-0.0795566
	Ctdsp1	0.146611	0.404193
	Ctdspl2	0.0904555	-0.175039
	Ctla2a	-0.0419939	-0.534532
	Ctla4	0.701153	-0.525169
	Ctnna1	-0.207097	-0.474297
	Ctnnb1	0.0719434	-2.24423
	Ctnnbl1	0.0675303	-0.159772
	Ctps	-0.0686968	-0.303991
	Ctps2	0.0280031	-0.165578
	Ctr9	0.00716325	-0.234959
	Ctsa	0.0992151	-0.146513
	Ctsb	0.0651212	-0.297207
	Ctsc	0.0924205	-0.234825
	Ctsd	-0.278671	-0.609996
	Ctss	0.497393	0.441847
	Ctsw	0.0203666	-0.304508
	Ctsz	0.0888931	0.0553867
	Ctu1	-0.23055	-0.548476
	Ctu2	-0.070495	-0.242609
	Cul1	-0.0541812	-0.23981
	Cul2	0.0233134	-0.358754
	Cul3	0.0115996	-0.270973
	Cul4a	-0.0265164	-0.288955
	Cul4b	0.0519993	-0.313357
	Cul5	-0.0243611	-0.260166
	2210016L21Rik	-0.0648831	-0.148696
	Cuta	-0.0865077	-0.473686
	Cux1	-0.0203951	-0.281467
	Cwc15	0.0821565	-0.282339
	Cwc22	0.0181065	-0.302253
	Cwc25	0.0639774	-0.18571
	Cwc27	-0.0642125	-0.0253889
	Cwf19l1	0.00526911	-0.245088
	Cwf19l2	0.0460613	-0.142029
	Cxcr3	0.376399	0.955188
	Cxcr4	0.984357	0.00051958
	Cxcr6	0.140614	-0.427602
	Cxxc1	-0.0067538	-0.0266872
	Cyb5a	0.102168	-0.259852
	Cyb5b	-0.0746883	-0.412212
	Cyb5r1	-0.160031	-0.0829193
	Cyb5r3	-0.0650587	-0.240176
	Cyb5r4	0.0610833	-0.235656
	Cyba	0.0404903	-0.387805
	Cybc1	0.00562553	-0.282966
	Cyc1	0.0480398	-0.253888
	Cycs	-0.0470102	-0.326253
	Cyfip1	-0.217186	-0.278832
	Cyfip2	-0.0533028	-0.288695
	Cyhr1	0.0766311	-0.485483
	Cyld	0.0667888	-0.19803
	Cyp20a1	0.017494	-0.457585
	Cyp51	0.00012226	-0.40768
	Cyria	0.28479	-0.134294
	Cyrib	0.0699418	-0.217266
	Cyth1	0.169839	-0.0196343
	Cyth4	-0.169509	-0.108982
	Cytip	0.27624	0.653001
	Czib	-0.0846902	-0.298098
	D10Wsu102e	0.0554711	-0.123224
	D6Wsu163e	-0.0081298	-0.417162
	D8Ertd738e	0.0110282	-0.394653
	Dad1	0.0267231	-0.406388
	Daglb	-0.0730501	-0.957077
	Dalrd3	-0.0740224	-0.422962
	Dap	0.0397863	-0.449443
	Dap3	0.0642741	-0.156388
	Dapk2	0.160348	-0.175727
	Dapk3	0.0364472	-0.268631
	Dars	0.0608085	-0.244533
	Dars2	0.0979334	0.234353
	Daxx	-0.0381115	0.0940569
	Dazap1	0.00927567	-0.138852
	Dbi	0.030548	-0.413118
	Dbnl	0.0783342	-0.159475
	Dbr1	0.0387903	-0.145517
	Dbt	-0.234791	-0.464631
	Dcaf1	0.0586717	-0.165268
	Dcaf11	-0.133033	-0.574203
	Dcaf13	-0.0068767	-0.265716
	Dcaf5	-0.0724836	-0.282116
	Dcaf7	0.042916	-0.0140285
	Dcaf8	-0.108168	-0.160251
	Dcakd	-0.0444241	-0.377848
	Dck	0.1789	-0.146677
	Dcp1a	-0.0495415	-0.343723
	Dcp1b	-0.0094937	-0.421964
	Dcp2	-0.0481489	-0.828284
	Dcps	0.103322	-0.222332
	Dctn1	-0.0176035	-0.924606
	Dctn2	0.0460096	-0.187937
	Dctn3	0.0535672	-0.258338
	Dctn4	0.0763179	-0.355817
	Dctn5	-0.0969666	-0.136593
	Dctn6	-0.0206037	-0.249456
	Dctpp1	0.086143	-0.503288
	Dcun1d1	0.0317968	-0.267581
	Dcun1d3	-0.110866	-0.837705
	Dcun1d5	0.0740772	-0.0425089
	Dcxr	-0.0679818	0.769715
	Dda1	-0.075363	-0.413408
	Ddb1	-0.0170628	-0.269579
	Ddb2	0.0262224	0.0792112
	Ddhd2	-0.101108	-0.555042
	Ddi2	0.0286205	-0.125172
	Ddost	-0.0332756	-0.36766
	Ddrgk1	0.0283374	-0.31505
	Ddt	-0.0697702	-0.263313
	Ddx1	-0.005372	-0.251755
	Ddx10	0.0413945	-0.25517
	Ddx11	-0.207695	-0.340185
	Ddx17	-0.142071	-0.246239
	Ddx18	0.0287337	-0.32793
	Ddx19a	0.045118	-0.304555
	Ddx19b	-0.0632992	-0.493429
	Ddx20	-0.005896	-0.235698
	Ddx21	0.0257425	-0.252434
	Ddx23	-0.0341657	-0.175965
	Ddx24	0.012155	-0.313522
	Ddx27	0.0264792	-0.213503
	Ddx28	0.0310047	-0.137815
	Ddx31	0.048898	-0.398142
	Ddx39a	0.0523834	-0.200487
	Ddx39b	-0.0354484	-0.125289
	Ddx3x	0.0133772	-0.301005
	Ddx3y	-0.0258937	-0.291079
	Ddx41	-0.0182978	-0.20035
	Ddx42	0.00947307	-0.1063
	Ddx46	-0.0020486	-0.209215
	Ddx47	0.0234464	-0.218968
	Ddx49	-0.0219017	-0.402426
	Ddx5	0.00282216	-0.228938
	Ddx50	-0.0130177	-0.260507
	Ddx51	-0.0912694	-0.297242
	Ddx52	0.0404389	-0.344133
	Ddx54	-0.0770832	-0.273743
	Ddx55	0.0680699	-0.144827
	Ddx56	-0.0112277	-0.0770924
	Ddx58	-0.0721129	-0.885832
	Ddx59	-0.0203408	-0.303882
	Ddx6	0.00027701	-0.222899
	Decr1	0.215955	-0.211667
	Decr2	-0.0207231	-0.731164
	Def6	-0.0657936	-0.118104
	Degs1	-0.0878273	-0.206654
	Dek	0.138064	0.0489777
	Dennd10	-0.0862426	-0.254557
	Dennd11	-0.336326	-0.768698
	Dennd1b	-0.0847115	-0.250649
	Dennd1c	-0.268923	-0.173175
	Dennd2d	-0.128821	-0.40017
	Dennd3	-0.738993	-0.263348
	Dennd4a	0.171162	-0.313091
	Dennd4b	-0.216384	-0.310366
	Dennd4c	-0.156275	-0.364976
	Denr	-0.0572403	0.0008993
	Depdc1b	0.240531	-0.220342
	Depdc5	-0.0576803	-0.0769567
	Dera	0.0869722	-0.392323
	Derl1	-0.0362578	-0.480751
	Chtf8	0.1653	-0.127729
	Desi1	-0.0595351	-0.502244
	Dffa	-0.0520952	-0.12812
	Dffb	0.104902	0.547617
	Dgat1	-0.237818	-0.392694
	Dgcr8	0.0912634	-0.0724895
	Dgka	0.128212	-0.420568
	Dgkh	-0.453062	-2.76156
	Dgkz	-0.0591745	0.13062
	Dglucy	0.12119	-0.0256098
	Dguok	0.0915378	-1.05847
	Dhcr24	-0.0416267	-0.552101
	Dhcr7	-0.0160389	-0.196435
	Dhfr	0.11245	-0.105773
	Dhodh	-0.0541993	-0.154927
	Dhps	-0.0436383	-0.312593
	Dhrs1	0.102654	-0.288151
	Dhrs11	-0.145201	-1.0219
	Dhrs13	-0.0099681	-0.348768
	Dhrs4	0.0732621	-0.0802306
	Dhrs7	0.099288	-0.086539
	Dhrs7b	0.0360917	-0.161269
	Dhx15	0.0581954	-0.20206
	Dhx16	0.0336587	-0.132575
	Dhx29	-0.0710588	-0.49747
	Dhx30	-0.079556	-0.251778
	Dhx33	-0.103822	-0.207776
	Dhx34	0.0641075	-0.15909
	Dhx35	0.080638	-0.179367
	Dhx36	0.0249838	-0.315397
	Dhx37	-0.153981	-0.187245
	Dhx38	0.0582876	-0.125231
	Dhx40	0.157837	-0.473199
	Dhx57	-0.0294615	-0.312449
	Dhx58	-0.0350299	-0.410695
	Dhx8	-0.0538803	-0.183062
	Dhx9	0.0495787	-0.157644
	Diablo	-0.165155	-0.0602723
	Diaph1	-0.0544537	-0.311768
	Diaph2	-0.0248871	-0.126668
	Diaph3	0.177707	-0.189578
	Dicer1	-0.0399712	-0.207364
	Dido1	-0.0892519	-0.214243
	Utp25	0.0323267	-0.372337
	Dimt1	-0.112214	-0.223455
	Dip2b	-0.214471	-0.209409
	Dipk2a	0.117693	-0.0570011
	Dis3	0.056228	-0.17989
	Dis3l	0.0446953	-0.409409
	Dis3l2	-0.0175271	-0.286982
	Dkc1	0.0500554	-0.109037
	Dlat	-0.162375	-0.309165
	Dld	0.0873932	-0.191035
	Dlg1	-0.0425629	-0.245099
	Dlgap4	-0.183271	-0.44131
	Dlgap5	0.129187	-0.0294237
	Dlst	0.0578461	-0.0434388
	Dmac2	0.0527825	-0.334982
	Dmap1	-0.0269969	-0.227749
	Dmxl1	-0.0244519	-0.441774
	Dna2	-0.0549727	-0.395284
	Dnaaf5	0.00381612	-0.398494
	Dnaja1	0.0724535	-0.362349
	Dnaja2	0.0457206	-0.242982
	Dnaja3	-0.0893049	-0.188482
	Dnajb1	0.123409	-0.188097
	Dnajb11	-0.0939094	-0.306028
	Dnajb12	-0.0711326	-0.124407
	Dnajb4	-0.296996	-0.136333
	Dnajb6	-0.0587873	-0.244899
	Dnajc1	-0.100204	-0.395326
	Dnajc10	-0.062994	-0.600693
	Dnajc11	-0.179891	-0.473377
	Dnajc13	-0.0817092	-0.343083
	Dnajc15	-0.0704156	-0.339638
	Dnajc17	0.026318	-0.337415
	Dnajc19	0.0626797	-0.0093227
	Dnajc2	0.0110524	-0.174222
	Dnajc21	-0.0428865	-0.293998
	Dnajc24	0.0667088	-0.336404
	Dnajc3	0.0255012	-0.232083
	Dnajc5	-0.0588175	-0.39147
	Dnajc7	-0.0051744	-0.197256
	Dnajc8	0.0543829	-0.138852
	Dnajc9	0.0597437	0.0389539
	Dnm2	-0.0642122	-0.293275
	Dnm3	-0.445627	-0.752257
	Dnmt1	0.0583278	-0.0362083
	Dnmt3a	-0.182661	-0.0532466
	Dnmt3b	0.0535527	0.267599
	Dnpep	0.0508591	-0.277818
	Dnph1	0.394339	0.0290413
	Dnttip1	0.0623936	-0.258022
	Dnttip2	0.0218187	-0.167379
	Dock11	0.138465	-0.129705
	Dock2	-0.0017172	-0.233822
	Dock5	-0.43964	-0.627768
	Dock8	-0.254334	-0.313547
	Dock9	-0.234819	-0.234532
	Dohh	0.043046	-0.386115
	Dok1	0.0068124	0.229041
	Dok2	-0.189315	-0.300114
	Dolpp1	-0.188019	-0.641432
	Donson	0.089472	-0.206749
	Dop1a	-0.0926024	-0.669672
	Dop1b	-0.253443	-0.38389
	Dpagt1	0.0180124	-0.518087
	Gm17018	0.0841016	-0.436954
	Dpf2	-0.0163918	0.0589513
	Dph1	-0.114275	-0.339733
	Dph2	-0.0587627	-0.216246
	Dph5	-0.0027999	-0.341782
	Dph6	-0.103847	-0.552742
	Dph7	-0.0041943	-0.083336
	Dpm1	-0.32417	-0.194075
	Dpm3	0.132064	0.0347292
	Dpp3	-0.083482	-0.288856
	Dpp4	0.103663	-0.0358875
	Dpp7	0.0919253	0.357203
	Dpp8	-0.0111778	-0.497524
	Dpp9	-0.0581763	-0.248502
	Dpy19l1	0.0634027	-0.22646
	Dpy30	0.0209189	-1.13872
	Dpysl2	0.0543382	-0.0632175
	Dr1	0.0369942	-0.155288
	Drap1	0.0982763	-0.357376
	Drg1	0.0366765	-0.281503
	Drg2	-0.0057678	-0.299173
	Drosha	-0.0603277	-0.0891933
	Dscc1	0.117403	-0.111965
	Dsn1	0.0332739	-0.202577
	Dsp	-0.412676	-1.62432
	Dst	0.312624	-0.566668
	Dstn	0.125574	-0.392018
	Dtd1	0.154399	-0.211849
	Dtd2	-0.0497916	-0.537744
	Dtl	0.159284	0.0593401
	Dtnb	-0.0005828	0.0828824
	Dtx3l	0.194109	-0.319035
	Dtymk	0.0459905	-0.149778
	Dus1l	-0.0849659	0.452196
	Dus2	-0.284173	-0.423159
	Dus3l	-0.11677	-0.164359
	Dusp11	0.0306882	-0.229773
	Dusp12	-0.0919066	-0.41214
	Dusp3	-0.184875	-0.649547
	Dusp5	-0.0985402	-0.783224
	Dusp6	-0.0392371	-0.351722
	Dut	0.0692743	-0.148153
	Dvl2	0.0354942	-0.223068
	Dxo	-0.0591147	-0.41967
	Dym	-0.0969601	-0.396923
	Dync1h1	-0.0766651	-0.280739
	Dync1i2	0.0446301	-0.175146
	Dync1li1	-0.0673501	-0.450352
	Dync1li2	-0.181877	-0.311758
	Dynll1	-0.0127932	-0.494706
	Dynll2	0.0268821	-0.161335
	Dynlrb1	-0.0062647	-0.276522
	Dyrk1a	0.0890642	0.299014
	E2f3	-0.0890285	-0.148283
	E2f4	-0.0792994	-0.291418
	E2f8	0.0668365	0.0364172
	Eaf1	-0.217687	-0.204061
	Ears2	-0.128865	-1.13307
	Ebag9	6.04e-05	-0.51207
	Ebna1bp2	0.030878	-0.253057
	Ebp	-0.0446813	-0.0813274
	Ecd	-0.0462373	-0.362263
	Ech1	-0.0633335	-0.413684
	Echdc1	-0.03684	-0.261623
	Echs1	0.028286	-0.134545
	Eci1	-0.109474	-0.281376
	Eci2	-0.0329284	-0.441997
	Ecpas	-0.0528158	-0.301765
	Ecsit	-0.0017512	0.0824257
	Ect2	0.17007	-0.273649
	Edaradd	-0.270842	0.0308436
	Edc3	0.0286924	-0.254667
	Edc4	-0.126768	-0.281429
	Edem1	-0.173242	-0.0751023
	Edem2	-0.155266	-0.429386
	Edem3	-0.0619826	-0.361125
	Edf1	-0.0672096	-0.151838
	Edrf1	-0.0384135	-0.784515
	Eea1	-0.180706	-0.304742
	Eed	0.093103	-0.109744
	Eef1a1	0.0848264	-0.43129
	Eef1akmt1	-0.079163	-0.43237
	Eef1akmt2	0.0617434	-0.215568
	Eef1aknmt	0.0798967	-0.410059
	Eef1b2	0.0564913	-0.316359
	Eef1d	-0.0239776	-0.319994
	Eef1e1	0.0249089	-0.39604
	Eef1g	0.00442334	-0.391003
	Eef2	-0.0068265	-0.364635
	Eef2kmt	0.0793821	-0.913098
	Eefsec	0.0563746	-0.0810943
	Efhd2	-0.0019379	-0.183101
	Efl1	-0.164463	-0.541042
	Efr3a	0.0365597	-0.176233
	Eftud2	-0.0168757	-0.137453
	Egln1	0.0574327	-0.18313
	Egr1	-0.137896	-0.520917
	Egr3	0.0203739	-1.66173
	Ehbp1l1	-0.36693	-1.22695
	Ehd1	-0.0975907	-0.356418
	Ehd3	0.316314	-0.430439
	Ehd4	-0.136585	-0.442344
	Ehhadh	-0.103803	-0.43639
	Ehmt1	0.0630879	-0.426698
	Ehmt2	-0.0121739	0.00380086
	Ei24	0.0341059	-0.27523
	Eif1	-0.0914377	-0.450305
	Eif1a	-0.0238301	-0.247863
	Eif1ad	0.0105995	-0.293139
	Eif1ax	0.0554043	-0.380142
	Eif1b	-0.0468298	-0.645444
	Eif2a	0.0755289	0.0827583
	Eif2ak2	-0.092821	-0.357306
	Eif2ak3	-0.196185	-0.811885
	Eif2ak4	-0.0732442	-0.905019
	Eif2b1	-0.026971	-0.374969
	Eif2b2	-0.0309281	-0.176253
	Eif2b3	-0.0743443	-0.356699
	Eif2b4	0.0235774	-0.255505
	Eif2b5	-0.0027118	-0.344703
	Eif2d	-0.0192941	-0.259167
	Eif2s1	0.0498709	-0.253912
	Eif2s2	-0.0368443	-0.26176
	Eif2s3x	0.0277835	-0.194339
	Eif2s3y	0.0870085	-0.228617
	Eif3a	-0.0023244	-0.300177
	Eif3b	-0.0166514	-0.226152
	Eif3c	-0.0330398	-0.319789
	Eif3d	0.0177378	-0.221055
	Eif3e	0.112768	-0.278973
	Eif3f	0.0315064	-0.324955
	Eif3g	-0.0210343	-0.199103
	Eif3h	0.114743	-0.331745
	Eif3i	0.0411712	-0.265897
	Eif3j1	0.0573145	-0.186257
	Eif3k	0.0686802	-0.281266
	Eif3l	0.0108846	-0.27657
	Eif3m	0.0882016	-0.418767
	Eif4a1	0.013809	-0.365057
	Eif4a2	-0.162223	-0.525628
	Eif4a3	0.0451306	-0.163406
	Eif4b	0.0327121	-0.0714763
	Eif4e	0.0212799	-0.286728
	Eif4e2	0.0341433	-0.752776
	Eif4e3	0.195058	0.00527543
	Eif4ebp2	0.056927	0.167701
	Eif4enif1	0.0189388	-0.125735
	Eif4g1	-0.0542027	-0.24
	Eif4g2	-0.0198477	-0.350708
	Eif4g3	-0.217393	-0.255912
	Eif4h	0.0225107	0.0143329
	Eif5	-0.100543	-0.924996
	Eif5a	0.0789038	-0.36737
	Eif5b	-0.043099	-0.621552
	Eif6	0.0225859	-0.407355
	Eipr1	0.0649827	-0.274198
	Elac2	-0.0807154	-0.305418
	Elavl1	-0.0151726	-0.102448
	Elf1	0.0601336	0.00308305
	Elf2	0.0339072	0.0242963
	Elf4	-0.0821647	-0.101667
	Ell	-0.0583715	-0.232282
	Elmo1	-0.0550601	-0.264838
	Elmo2	-0.290955	-0.42337
	Eloa	0.0449027	-0.110278
	Elob	0.0399471	-0.229521
	Eloc	0.0698324	-0.26559
	Elovl1	-0.1199	-0.170985
	Elovl5	0.116136	-0.277391
	Elp1	-0.0754538	-0.306052
	Elp2	0.0125123	-0.276216
	Elp3	0.0109823	-0.286769
	Elp4	0.0950031	-0.178222
	Elp5	-0.0137924	-0.344043
	Elp6	0.113547	-0.476612
	Emb	0.275517	-0.118973
	Emc1	-0.113323	-0.378758
	Emc10	0.0742963	-0.338211
	Emc2	0.0092578	-0.352093
	Emc3	0.0767417	-0.127904
	Emc4	0.0112318	-0.223922
	Emc6	0.0282726	-0.0832224
	Emc7	0.0987708	0.0215428
	Emc8	0.0946187	-0.255654
	Emd	0.102657	-0.0178312
	Eme1	0.0702535	-0.0476368
	Emg1	0.034272	-0.252721
	Emilin2	-0.236645	-0.313979
	Eml2	-0.037855	-0.241405
	Eml3	-0.0038298	-0.130378
	Eml4	0.0289931	-0.105648
	Emsy	0.0326906	-0.284147
	Enah	0.244981	0.181273
	Endod1	-0.113721	-0.629244
	Endog	0.0212691	-0.255258
	Engase	-0.131541	-0.345405
	Eno1	-0.0518325	-0.376277
	Eno3	0.263493	-0.515256
	Enoph1	0.0645406	-0.216131
	Enpp4	-0.0922893	-0.573595
	Ensa	-0.0108889	0.0222762
	Entpd1	-0.269557	-0.36462
	Entpd5	0.209415	0.954978
	Entpd6	0.0389304	0.0515495
	Eny2	0.0806292	-0.494553
	Eomes	-0.103503	-0.723124
	Ep300	-0.0311736	-0.105705
	Ep400	-0.0584067	-0.13684
	Epb41	-0.119564	-0.198193
	Epb41l2	0.0444872	-0.0677619
	Epc1	-0.0547878	-0.282445
	Epc2	0.0425073	-0.606125
	Epg5	-0.216363	-0.567286
	Ephx1	0.555261	0.277462
	Epm2aip1	-0.137214	-0.0042132
	Epn1	0.0359191	0.00387182
	Eprs	-0.0950706	-0.311726
	Eps15	-0.011954	-0.288487
	Eps15l1	-0.0231517	-0.270619
	Eps8	-0.356389	-0.291833
	Epsti1	0.0262153	-0.0502994
	Eral1	0.0574158	-0.336007
	Erap1	0.0545032	-0.240848
	Erbin	0.0389452	-0.154846
	Erc1	-0.1435	-0.362178
	Ercc1	-0.15571	-0.397502
	Ercc2	-0.186147	-0.59917
	Ercc3	0.014488	-0.419017
	Ercc4	-0.0717959	-0.484923
	Ercc6l	0.175723	1.06052
	Erg28	0.0425986	-0.106911
	Ergic1	-0.0501603	-0.202301
	Ergic2	-0.0868103	-0.336202
	Ergic3	0.00571166	-0.151512
	Erh	0.11174	-0.363373
	Eri1	0.135336	-0.100987
	Eri3	0.118244	0.204611
	Erich1	0.0830432	0.208154
	Erlec1	0.0176484	-0.0977939
	Erlin1	-0.0041236	0.501472
	Erlin2	-0.0958422	-0.279344
	Ermp1	-0.0931566	-0.556149
	Ero1a	-0.312147	-0.776967
	Ero1b	-0.0332018	-0.479509
	Erp29	0.0617384	-0.229082
	Erp44	-0.0075105	-0.169728
	Esco2	0.334143	-0.36626
	Esd	0.0284704	-0.341918
	Esf1	-0.0456464	-0.303444
	Espl1	0.0206092	-0.500629
	Esrra	-0.13568	-0.211094
	Ess2	-0.0380914	-0.143728
	Esyt1	-0.0145248	-0.20007
	Esyt2	-0.0563908	-0.831938
	Etf1	0.00375587	-0.301359
	Etfa	0.0906267	-0.288467
	Etfb	-0.0271808	-0.173239
	Etfdh	0.0643458	-0.165754
	Ethe1	0.135959	-0.150788
	Etnk1	-0.0633528	-0.40173
	Ets1	0.268937	-0.0525856
	Etv3	-0.0659324	-0.165888
	Etv6	0.0570703	-0.342093
	D16Ertd472e	0.085197	-0.205344
	Evi2	-0.462467	-0.296234
	Evl	-0.0891225	-0.273487
	Ewsr1	0.0128614	-0.108615
	Exoc1	-0.0454266	0.193177
	Exoc2	0.0189658	-0.150347
	Exoc3	0.138738	-0.25152
	Exoc4	0.0665012	-0.323135
	Exoc5	0.0155342	-0.472053
	Exoc6	-0.0402107	-0.275525
	Exoc7	0.0839545	-0.286545
	Exoc8	-0.0801303	0.1228
	Exog	0.144055	-0.433636
	Exosc1	-0.0520111	-0.140193
	Exosc10	0.0235108	-0.190591
	Exosc2	0.013331	-0.142579
	Exosc3	0.0314472	-0.264732
	Exosc4	-0.0046748	-0.327175
	Exosc5	0.00940279	-0.103164
	Exosc7	0.0207679	-0.217406
	Exosc8	0.0669745	-0.0284101
	Exosc9	-0.007688	-0.362048
	Ext2	0.0176376	-0.605178
	Eya3	0.0275904	-0.169304
	Ezh1	0.0148564	-0.985962
	Ezh2	0.115103	-0.122298
	Ezr	0.0683931	-0.256986
	F2r	-0.0543946	-0.204382
	F8a	0.143594	-0.0771678
	Faah	0.102855	-0.0014418
	Faap100	-0.0910397	-0.287054
	Fabp5	0.234601	0.0303319
	Fadd	0.00815512	-0.0698345
	Fads1	0.0572351	-0.313177
	Fads2	-0.132687	-0.430727
	Faf1	0.0694568	-0.260166
	Faf2	-0.0482725	-0.38782
	Fah	-0.646441	-1.38686
	Fahd2a	0.199373	-0.0642576
	Faim	-0.0259261	-0.448824
	Fam102a	-0.0655301	-0.210786
	Fam107b	-0.0088172	-0.248647
	Fam111a	0.0577593	-0.278761
	Fam114a1	-0.406553	-0.550002
	Fam114a2	-0.0272518	-0.456471
	Fam118a	0.0906618	-0.431576
	Fam118b	0.166784	0.131287
	Fam120a	-0.0029793	-0.191898
	Fam126a	0.0228402	-0.142683
	Fam133b	0.165484	0.11968
	Fam136a	-0.0523666	-0.330438
	Fam160b1	-0.0610336	-0.763403
	Fam162a	0.00415249	-0.161352
	Fam169b	0.0937426	-0.072275
	Fam172a	0.105669	-0.504244
	Fam185a	0.0292956	-0.119064
	Fam207a	0.0140495	-0.155856
	Fam20a	-0.40295	-0.720555
	Fam20b	-0.176988	-0.372443
	Fam210a	0.0938885	-0.440741
	Fam234b	-0.0225523	-0.54798
	Fam32a	0.1379	0.12452
	Fam3a	0.100964	-0.278807
	Fam3c	-0.0409793	-0.194311
	Fam50a	-0.0415714	-0.0720127
	Fam76a	0.0823386	-0.128478
	Fam76b	0.0624691	-0.0941833
	Fam91a1	-0.0341767	0.306088
	Fam98a	-0.0583074	-0.3366
	Fam98b	0.00891908	-0.192704
	Fam98c	-0.0100153	-0.142003
	Fanca	-0.12164	-0.344395
	Fancd2	-0.0007516	-0.172302
	Fanci	0.0670721	-0.101204
	Far1	0.0125005	-0.269964
	Farp1	-0.433433	-0.686196
	Fars2	0.0855786	-0.216472
	Farsa	-0.0254434	-0.405792
	Farsb	-0.0584453	-0.315998
	Fasn	-0.0728347	-0.302001
	Fastkd2	0.017589	-0.139209
	Fastkd5	-0.008502	-0.316232
	Fau	0.117322	-0.139093
	Fbl	0.107547	-0.287129
	Fbln1	0.269318	-0.150991
	Fbxl18	-0.289758	0.0197806
	Fbxl20	0.253575	-0.313554
	Fbxl6	-0.0142733	-0.342418
	Fbxl8	-0.0357059	-0.104894
	Fbxo22	-0.0357452	-0.194503
	Fbxo28	-0.137413	-0.240986
	Fbxo3	-0.0081499	-0.237689
	Fbxo30	-0.120114	-0.499998
	Fbxo33	0.0831541	-0.398371
	Fbxo38	-0.0445573	-1.24965
	Fbxo4	-0.0659481	-0.454514
	Fbxo42	0.0619678	-0.349773
	Fbxo5	0.129221	-0.187388
	Fbxo6	0.00149921	-0.828876
	Fbxo7	0.109318	0.305152
	Fbxo9	-0.205119	0.360924
	Fbxw11	-0.0126053	-0.362355
	Fcer1g	-0.841708	-1.25342
	Fcf1	0.0183722	-0.249627
	Fcho1	-0.132741	-0.344996
	Fdft1	-0.0689726	-0.675746
	Fdps	-0.167457	-0.603549
	Fdx1	-0.0960102	-0.367755
	Fdx2	0.0112252	-0.440077
	Fdxr	0.0557876	-0.515
	Fem1b	0.0914796	-0.542962
	Fen1	0.0815059	-0.102959
	Fermt3	0.0603994	-0.0957033
	Fgd3	-0.0795232	-0.260546
	Fgfr1op2	0.0470546	-0.265741
	Fgl2	-0.109395	-0.492108
	Fgr	-0.226534	-0.462449
	Fh1	0.114608	-0.197786
	Fhl2	-0.185899	-0.487454
	Fhl3	-0.177546	-0.209588
	Fhod1	-0.101914	-0.194033
	Fibp	-0.0918738	0.152206
	Fig4	0.0422391	-0.427927
	Filip1l	-0.129955	-0.374419
	Fip1l1	0.110039	-0.194616
	Fis1	0.117307	-0.47443
	Fiz1	0.0756265	0.446207
	Fkbp15	-0.0588495	-0.343474
	Fkbp1a	-0.068337	-0.353739
	Fkbp2	-0.0403089	-0.14062
	Fkbp3	0.0801381	-0.171518
	Fkbp4	0.0948085	-0.117279
	Fkbp5	-0.166559	-0.275115
	Fkbp8	-0.101989	-0.247712
	Flad1	-0.143338	-0.395859
	Fli1	-0.0351902	-0.0752198
	Flii	-0.010793	-0.350846
	Flna	-0.0329705	-0.316074
	Flnb	0.219722	0.209297
	Flot1	-0.0777955	-0.119134
	Flot2	0.250415	-0.12778
	Fmnl1	-0.126626	-0.29111
	Fmr1	0.0796218	-0.142461
	Fn3krp	-0.250003	-0.48297
	Fnbp1	-0.0001287	-0.145289
	Fnbp4	0.0146305	-0.0733947
	Fndc3a	-0.316254	-0.878707
	Fnta	0.0157755	-0.395756
	Fntb	0.0512513	-0.308406
	Focad	0.00776478	-0.924538
	Fosl2	-0.259981	-0.781393
	Foxj3	0.0191532	1.86778
	Foxk1	-0.108321	-0.158663
	Foxk2	-0.0226071	-0.0374038
	Foxo1	0.0235122	-0.182407
	Foxp1	0.188861	-0.0565099
	Fpgs	-0.0779414	-0.0566719
	Fra10ac1	-0.106511	-0.193045
	Frg1	0.244149	0.00608098
	Frmd8	0.046089	-0.317302
	Fryl	-0.135926	-0.615583
	Fsd1l	0.739079	1.73304
	Fth1	-0.182938	-0.73115
	Ftl1	-0.252325	-0.568939
	Fto	-0.0236369	-0.225983
	Ftsj1	0.110863	-0.286076
	Ftsj3	-0.0405588	-0.235869
	Fubp1	-0.0124018	-0.111197
	Fubp3	-0.0227293	-0.173946
	Fuca1	0.0591919	0.0354634
	Fuca2	-0.155195	0.158443
	Fundc2	0.176793	0.00938443
	Furin	-0.442812	-1.72824
	Fus	-0.0037374	-0.130654
	Fut8	0.163799	0.104862
	Fxn	0.293715	-0.408264
	Fxr1	-0.044284	-0.304312
	Fxr2	-0.0452269	-0.196562
	Fxyd5	-0.0187917	0.176085
	Fyb	-0.196707	-0.365648
	Fyco1	-0.146251	-0.69098
	Fyn	-0.06261	-0.224567
	Fyttd1	-0.0900393	0.00921698
	G3bp1	0.0594027	-0.247324
	G3bp2	0.0419026	-0.297518
	G6pc3	-0.0970417	-0.190315
	G6pdx	-0.0423657	-0.287859
	Gaa	-0.145535	-0.938348
	Gabarap	-0.0256212	-0.27122
	Gabarapl2	-0.0639597	-0.240358
	Gabpa	0.0216058	-0.230757
	Gabpb1	0.0541523	0.129801
	Gabpb2	0.0292124	-0.052279
	Gadd45gip1	0.0710781	0.122123
	Gak	-0.0458449	-0.222303
	Gale	-0.130515	-0.329458
	Galk1	0.0333344	-0.19175
	Galk2	0.0528535	-0.275674
	Galns	0.0620176	-0.256705
	Galnt1	-0.0479862	-0.379653
	Galnt12	-0.0386039	-0.187002
	Galnt3	-0.196617	-0.797867
	Galnt6	-0.0362997	-0.571303
	Galnt7	0.0356552	-0.227203
	Galt	-0.0907477	-0.328823
	Gan	-0.101742	-0.363509
	Ganab	-0.0512893	-0.333702
	Gapdh	-0.0334928	-0.384397
	Gapvd1	-0.0175376	-0.185035
	Gar1	0.0436034	-0.134276
	Gars	-0.0715621	-0.342917
	Gart	0.00527146	-0.232526
	Gata3	0.140028	-0.097467
	Gatad1	0.00142224	-0.0234898
	Gatad2a	-0.0230496	-0.0822979
	Gatad2b	0.109725	0.0597193
	Gatd1	0.174484	-0.197121
	Gatd3a	0.204558	-0.0430015
	Gatm	-0.102216	-0.376786
	Gba	-0.0944911	-0.286249
	Gba2	-0.0561458	-0.279544
	Gbe1	0.0507768	0.105433
	Gbf1	-0.197859	-0.358391
	Gbp2	0.394116	-0.0534301
	Gbp3	0.0910148	-0.188309
	Gbp5	0.424685	-0.0884203
	Gbp6	0.179128	-0.252434
	Gbp7	-0.0021451	-0.243454
	Gcat	0.12491	-0.226546
	Gcc1	-0.0555886	0.111939
	Gcc2	0.0466627	0.232094
	Gcdh	-0.090826	-0.207106
	Gcfc2	-0.0491027	-0.202835
	Gclc	0.118335	-0.0827521
	Gclm	0.148661	-0.0810359
	Gcn1	-0.15596	-0.370296
	Gcsh	-0.165449	-0.585526
	Gde1	0.0502616	-0.275631
	Gdi1	-0.313207	-0.126795
	Gdi2	0.0866965	-0.266662
	Gdpgp1	-0.153822	-0.89141
	Gem	-0.260559	-0.919073
	Gemin2	0.102145	0.472694
	Gemin5	-0.0230815	-0.36021
	Gemin6	-0.0318197	-0.84383
	Gemin7	0.0661962	0.261802
	Gen1	0.073644	-0.389004
	Get1	-0.0235545	1.78327
	Get3	0.0697816	-0.286006
	Get4	0.0196655	-0.274265
	Gfer	-0.17008	-0.253786
	Gfm1	-0.0183471	0.317025
	Gfm2	-0.121302	-0.363858
	Gfpt1	-0.305317	-0.543854
	Gga1	-0.0677706	-0.418276
	Gga3	-0.110679	-0.492061
	Ggact	0.15401	-0.41843
	Ggct	0.0426513	-0.156065
	Ggh	0.136135	-0.162111
	Ggnbp2	0.105272	-0.064697
	Ggps1	0.0379152	-0.340065
	Ggt1	0.157733	7.51e-05
	Ggta1	-0.0179009	-0.239802
	Ghitm	0.100673	0.0318018
	Gid8	-0.0154635	-0.563693
	Gigyf1	-0.0541792	-0.281586
	Gigyf2	-0.141503	-0.166126
	Gimap1	0.0408179	-0.304214
	Gimap3	0.136644	-0.0065363
	Gimap4	0.282397	0.126411
	Gimap5	0.0590256	-0.0298581
	Gimap6	0.188784	-0.0987293
	Gimap7	0.196019	-0.0534463
	Gimap8	-0.0264549	-0.230059
	Gimap9	0.2156	0.0164375
	Gins1	0.115631	-0.0378259
	Gins2	0.0589574	-0.318852
	Gins3	0.120457	0.898877
	Gins4	0.100581	-0.125896
	Gipc1	-0.0634256	-0.323892
	Gipc2	-0.785682	-0.731516
	Git1	-0.100265	-0.184851
	Git2	0.0172117	-0.211759
	Gk	-0.108767	-0.198344
	Gla	0.0808714	-0.228796
	Glb1	0.0592299	-0.331311
	Gle1	0.100527	-0.436538
	Glg1	-0.0236716	-0.362174
	Glipr1	-0.0427166	-0.383469
	Glipr2	0.107214	-0.154797
	Glmn	-0.123132	-0.270717
	Glmp	-0.0629615	-0.501241
	Glo1	0.821122	0.690097
	Glod4	0.113984	-0.199172
	Glrx	-0.100439	-0.529187
	Glrx2	-0.10325	-0.323618
	Glrx3	0.0861002	-0.202829
	Glrx5	-0.0029711	-0.317883
	Gltp	0.0846174	-0.23152
	Glud1	0.101766	-0.0609593
	Glul	0.32339	-0.0880984
	Glyr1	0.0349465	-0.199197
	Gm2a	0.375641	0.21312
	Gmds	-0.100144	-0.419883
	Gmeb1	0.0312963	-0.0049462
	Gmeb2	0.011664	0.119946
	Gmfb	0.0714675	-0.186985
	Gmfg	0.0895588	-0.231335
	Gmip	-0.18254	-0.256596
	Gmnn	0.148254	0.00188543
	Gmppa	-0.0741964	-0.831032
	Gmppb	-0.170294	-0.370372
	Gmpr2	0.0047198	-0.125583
	Gmps	0.0610605	-0.20861
	Gna11	-0.120839	-0.129781
	Gna13	0.104504	-0.180564
	Gnai2	-0.0041346	-0.186543
	Gnai3	0.0288161	-0.354438
	Gnaq	-0.10924	-0.282258
	Gnas	0.100228	-0.24976
	Gnb1	0.00491429	-0.242424
	Gnb2	0.0145512	-0.351745
	Gne	-0.23595	-0.160135
	Gng12	-0.108741	-0.480132
	Gng2	0.00580895	-0.361747
	Gng5	-0.0174775	-0.143907
	Gnl1	-0.0356609	-0.361289
	Gnl2	-0.0324829	-0.335144
	Gnl3	-0.0025642	-0.277454
	Gnl3l	0.00983365	0.0664123
	Gnpat	-0.0260015	-0.313856
	Gnpda1	-0.0877383	-0.184641
	Gnpda2	0.0120101	-0.277711
	Gnpnat1	-0.138548	-0.347718
	Gnptab	-0.0807722	-1.71621
	Gns	-0.361274	-0.459496
	Golga2	-0.215327	-0.489684
	Golga3	-0.128653	-0.342963
	Golga4	-0.180702	-0.160195
	Golga5	-0.0329126	-0.277806
	Golga7	-0.0410374	-0.306776
	Golgb1	-0.264073	-0.619353
	Golim4	-0.107509	-0.507615
	Golm1	-0.0075562	-0.329627
	Golph3	-0.0352202	-0.324767
	Golph3l	0.194272	0.0760761
	Golt1b	0.00847889	1.00075
	Gon4l	-0.115913	-0.864632
	Gopc	0.015968	-0.423262
	Gorasp2	-0.117038	-0.322158
	Gosr1	0.00667024	-0.183677
	Gosr2	0.0363885	-0.495653
	Got1	-0.041774	-0.146951
	Got2	0.0126403	-0.15683
	Gpaa1	-0.0811177	-0.320596
	Gpalpp1	0.0785022	-0.039478
[truncated: 4,407 more rows]

## Sheet: 5G
	Gene name	log2FC mRNA (all)	log2FC proteins (all)	prot up and mRNA up (both FC>1.5, q<0.05)	prot down and mRNA down (both FC<0.67, q<0.05)
	Aaas	-0.016128	-0.51157
	Aacs	-0.0595642	-0.314219
	Aagab	-0.0156545	-0.45767
	Aak1	-0.0062697	-0.159698
	Aamdc	0.107517	0.116743
	Aamp	-0.0150028	-0.326008
	Aar2	-0.0142166	-0.106273
	Aars	-0.100942	-0.4036
	Aars2	-0.197166	-0.327117
	Aarsd1	0.0637982	-0.349212
	Aasdhppt	0.0257721	-0.511476
	Aatf	0.0136218	-0.0990291
	Abca7	-0.224913	0.426817
	Abcb10	-0.0714185	0.0441795
	Abcb1a	0.0296054	-0.202584
	Abcb1b	0.00871124	-0.011966
	Abcb7	0.0744616	-0.201732
	Abcb8	-0.062161	-0.325722
	Abcb9	-0.181797	-0.174092
	Abcc1	-0.219821	-0.256122
	Abcc4	-0.0381582	-0.24392
	Abcd1	0.0607691	-0.0337236
	Abcd3	-0.0599469	-0.249938
	Abce1	-0.006732	-0.329567
	Abcf1	-0.0307419	-0.217876
	Abcf2	0.0467118	-0.26369
	Abcf3	-0.0650592	-0.209639
	Abcg3	0.28821	-0.399512
	Abhd10	0.0221383	-0.232687
	Abhd11	-0.0261303	-0.397577
	Abhd12	0.00505878	-0.405008
	Abhd13	0.0114382	-0.535097
	Abhd14b	-0.0766786	-0.213557
	Abhd15	0.0386021	-0.282929
	Abhd16a	0.090176	-0.0708404
	Abhd17a	0.0687174	-1.13566
	Abhd17b	0.125143	-0.615161
	Abhd5	-0.19922	-0.459362
	Abhd6	-0.163395	-0.550003
	Abi1	0.00430549	-0.103761
	Abi3	-0.059176	-0.308173
	Abitram	0.00968673	-0.251292
	Ablim1	0.0241634	-0.176232
	Abr	-0.200119	-0.395612
	Abracl	0.0323107	-0.869929
	Abraxas1	0.0455	-0.969786
	Abraxas2	-0.0779875	-0.142786
	Abt1	0.0437182	-0.0295809
	Acaa1a	0.00510773	-0.148157
	Acaa2	0.240205	-0.12697
	Acaca	-0.0738028	-0.281306
	Acad10	0.154814	-0.28982
	Acad11	-0.149161	-0.309225
	Acad8	-0.104856	0.175138
	Acad9	-0.0095256	-0.112537
	Acadl	-0.0299167	-0.303333
	Acadm	0.0964919	-0.0083119
	Acads	0.0119509	-0.107839
	Acadsb	0.0335899	-0.0775967
	Acadvl	0.0759745	-0.11039
	Acap1	-0.176764	-0.293231
	Acap2	0.00974826	-0.308688
	Acat1	-0.0091262	-0.226846
	Acat2	0.00910349	-0.300429
	Acbd3	-0.0713074	-0.136223
	Acbd5	-0.0789042	-0.061893
	Acbd6	0.0281956	-0.502066
	Acd	-0.102543	-0.363622
	Acin1	-0.0439048	-0.124461
	Acly	-0.0175002	-0.357082
	Aco1	-0.0802419	-0.355868
	Aco2	0.0361224	-0.151232
	Acot11	-0.227526	-0.611533
	Acot13	-0.0333061	-0.215812
	Acot2	-0.0484235	-0.346082
	Acot7	-0.0958433	-0.388438
	Acot8	-0.114474	-0.232065
	Acot9	-0.0579569	-0.298764
	Acox3	-0.146849	0.15622
	Acp1	0.00612888	-0.304044
	Acpp	-0.850396	-1.91199
	Acp5	-0.0987266	-0.487847
	Acp6	-0.218936	-0.0317419
	Acsf2	0.100791	-0.0660178
	Acsf3	0.14615	-0.150968
	Acsl1	-0.0341515	-0.245454
	Acsl3	0.0341935	-0.306839
	Acsl4	-0.091564	-0.514656
	Acsl5	0.0279035	-0.298612
	Acss1	0.601411	0.462362
	Acss2	-0.186168	-0.526779
	Actb	-0.144893	-0.550574
	Actg1	-0.143779	-0.510494
	Actl6a	0.0525884	-0.10529
	Actn1	-0.12607	-0.334869
	Actn4	0.016609	-0.307365
	Actr10	-0.0323832	-0.370042
	Actr1a	-0.0214537	-0.148562
	Actr1b	-0.054572	-0.318326
	Actr2	-0.0132565	-0.221236
	Actr3	0.0615528	-0.274759
	Actr5	-0.0783316	-0.213301
	Actr6	0.0165718	-0.254441
	Actr8	-0.0443153	-0.350665
	Acvrl1	-1.02899	-0.603743
	Acy1	-0.15981	-0.342688
	Acyp1	-0.0004962	-0.0734721
	Ada	0.163976	-0.179093
	Adam10	0.0574143	-0.200602
	Adam17	-0.0121288	-0.442752
	Adam19	-0.120726	-0.374471
	Adam8	-0.395023	-0.972393
	Adap1	-0.0886399	-0.307723
	Adar	-0.0790299	-0.309602
	Adat1	-0.323707	-0.125218
	Adat2	0.0701947	-2.43332
	Adck1	-0.0743492	-0.721255
	Adck5	-0.0556479	-0.17301
	Adcy3	-0.0465415	-1.58481
	Adcy7	-0.175994	-0.56732
	Add1	0.0206422	-0.102251
	Add3	0.173763	-0.00807
	Adgre5	0.489429	0.268333
	Adh5	0.0852542	-0.151477
	Adi1	0.160852	-0.218337
	Adk	0.0511005	-0.122123
	Adnp	-0.359593	-0.0206839
	Adnp2	0.033662	-0.0910163
	Ado	0.0153886	-0.0585762
	Adpgk	-0.12111	-0.30628
	Adprh	0.103353	-0.0173597
	Adprm	0.0555163	-0.482515
	Adprs	0.012913	-0.0765266
	Adrm1	-0.106152	-0.233834
	Adsl	0.0687108	-0.316188
	Adssl1	-0.138864	-0.585836
	Adss	0.124726	-0.0526677
	Aebp2	0.0325517	-0.163833
	Aen	-0.0726442	-0.510131
	Afdn	0.234208	0.461403
	Afg3l1	-0.0628285	-0.336108
	Afg3l2	-0.0971712	-0.249988
	Afmid	-0.153684	-0.153414
	Aftph	-0.0826008	1.11012
	Aga	-0.0433128	-0.272
	Agap2	-0.07589	-0.234651
	Agap3	0.0412708	-0.718119
	Agfg1	0.104799	-0.143832
	Agfg2	-0.058071	-0.274413
	Aggf1	-0.0329233	-0.043591
	Agk	0.0266888	-0.211967
	Agl	-0.14913	-0.829407
	Ago1	-0.157625	-0.292208
	Ago2	-0.075403	-0.34795
	Agpat1	-0.114438	-0.0804927
	Agpat3	-0.0487657	-0.435371
	Agpat4	-0.370004	-0.997832
	Agpat5	-0.0582755	-0.328639
	Agps	-0.0263001	-0.241391
	Ahctf1	0.0391437	-0.134863
	Ahcy	0.0512404	-0.219568
	Ahcyl1	0.0033375	-0.0151455
	Ahcyl2	0.101134	-0.11532
	Ahdc1	-0.219489	-0.199329
	Ahnak	-0.0566224	-0.309391
	Ahsa1	0.0242623	-0.170661
	Ahsa2	-0.153528	-0.184357
	Aida	0.146829	-0.919911
	Aifm1	-0.0096529	-0.159432
	Aim2	-0.170693	-0.735389
	Aimp1	0.0531698	-0.239328
	Aimp2	0.0412954	-0.287368
	Aip	0.074623	-0.247058
	Ak2	0.1668	0.00349669
	Ak3	-0.0481892	-0.0597644
	Ak4	-0.294868	-0.291852
	Ak6	-0.007019	-0.159237
	Akap1	0.101915	-0.538529
	Akap10	-0.144083	-1.24448
	Akap11	0.00253421	-0.216912
	Akap13	-0.032008	-0.100496
	Akap8	-0.0562813	-0.0930481
	Akap8l	-0.0493512	0.249974
	Akna	-0.098741	-0.249108
	Akr1a1	0.107402	-0.254985
	Akr1b3	0.0506482	-0.263933
	Akr1b10	-0.0488863	-0.0056663
	Akr1c13	0.401357	0.0756629
	Akr1e1	0.246652	0.0710377
	Akr7a5	-0.109514	-0.139398
	Akt1	-0.0115606	-0.186538
	Akt1s1	-0.0182773	-0.288941
	Akt2	-0.0854497	-0.394173
	Aktip	0.0238327	-1.09528
	Alad	-0.210584	-0.718631
	Alcam	-0.212212	-0.459847
	Aldh16a1	0.0946856	-0.12832
	Aldh18a1	-0.114354	-0.364103
	Aldh1b1	-0.210496	-0.0943891
	Aldh2	0.906458	-0.44025
	Aldh3a2	-0.0016916	-0.191141
	Aldh4a1	0.042778	-0.0216859
	Aldh7a1	-0.174459	-0.394307
	Aldh9a1	0.0676267	-0.154514
	Aldoa	-0.043001	-0.375381
	Aldoc	0.0270831	-0.301513
	Alg1	-0.191242	0.0662918
	Alg10b	0.0125708	-0.386171
	Alg11	-0.0882576	-0.334736
	Alg2	-0.229104	-0.431939
	Alg3	-0.112915	-0.53109
	Alg5	0.0613668	-0.286798
	Alg8	-0.0104929	-0.24355
	Alg9	-0.179954	-0.161527
	Alkbh3	-0.105997	-0.325524
	Alkbh5	0.0129664	-0.241618
	Alkbh6	-0.285656	-0.254558
	Alkbh8	-0.0295058	-0.436072
	Alyref	0.123429	0.0350818
	Ambra1	0.0124598	-0.22676
	Amdhd2	-0.0963776	-0.192497
	Amfr	-0.0409894	-0.296695
	Ammecr1l	-0.110457	-0.324897
	Ampd2	-0.120185	-0.141505
	Anapc1	-0.0323523	-0.240283
	Anapc11	0.0941453	-0.297346
	Anapc2	0.0613583	-0.274761
	Anapc4	-0.0291394	-0.341232
	Anapc5	0.0480309	-0.0761928
	Anapc7	0.0296607	-0.253826
	Angel2	0.0316184	-0.227942
	Ankfy1	-0.0121092	-0.571146
	Ankhd1	-0.0389378	-0.411155
	Ankle2	0.0207247	-0.262114
	Ankmy2	0.048787	-0.420053
	Ankrd10	0.0454094	-0.177644
	Ankrd11	-0.0702067	-0.247185
	Ankrd13a	-0.0254969	-0.370103
	Ankrd17	-0.0143834	-0.473249
	Ankrd28	0.0810412	-0.311169
	Ankrd44	-0.0114014	-0.326436
	Ankrd46	0.104731	-0.100306
	Ankrd49	-0.0834433	-0.229863
	Ankrd52	-0.130637	-0.522639
	Ankrd54	-0.117337	-0.194845
	Anks1	-0.191461	-0.414412
	Ankzf1	-0.321986	-0.0494363
	Anln	0.110438	-0.300546
	Ano10	-0.0213212	-0.391493
	Ano6	0.00340233	-0.248364
	Anp32a	0.185864	-0.0068148
	Anp32b	0.0857132	-0.0998423
	Anp32e	0.178498	-0.153208
	Antkmt	-0.048138	-0.0918648
	Anxa1	-0.255269	-1.06467
	Anxa11	0.0293966	-0.219241
	Anxa2	-0.087071	-0.502952
	Anxa4	-0.157793	-0.213775
	Anxa5	-0.301502	-0.754232
	Anxa6	0.0702345	-0.279648
	Anxa7	-0.0718171	-0.440217
	Ap1b1	-0.0335792	-0.270686
	Ap1g1	-0.0589664	-0.310347
	Ap1g2	-0.12908	0.0391472
	Ap1m1	0.108305	-0.107256
	Ap1s1	0.114732	-0.188924
	Ap1s2	0.0793737	0.00068484
	Ap1s3	0.016058	-0.428691
	Ap2a1	-0.0713893	-0.332386
	Ap2a2	-0.12405	-0.444578
	Ap2b1	-0.0208451	-0.276572
	Ap2m1	0.0484908	-0.34399
	Ap2s1	0.0271001	-0.22916
	Ap3b1	0.102812	-0.3826
	Ap3d1	-0.118799	-0.39839
	Ap3m1	-0.11722	-0.629417
	Ap3s1	0.0351853	-0.41771
	Ap4b1	-0.289264	-1.01789
	Ap4e1	-0.0673544	-0.262576
	Ap4m1	-0.0174581	-0.325244
	Ap4s1	-0.0796486	-0.400787
	Ap5b1	0.0510238	0.280885
	Ap5m1	-0.0208293	-0.457112
	Ap5z1	-0.307755	-0.357363
	Apaf1	-0.005886	-0.339823
	Apbb1ip	-0.0742408	-0.36143
	Apeh	-0.0530434	-0.291198
	Apex1	0.0532751	-0.248862
	Api5	0.0948486	-0.183811
	Apip	-0.106358	-0.336163
	Apmap	0.011089	-0.393199
	Apobec3	0.0221887	-0.257755
	Apobr	-0.470547	-0.585357
	Apoo	0.178686	-0.270888
	Apool	0.169238	0.0532186
	Appbp2	0.010517	-0.743938
	Appl1	0.0780828	-0.0831862
	Appl2	-0.184101	-0.785161
	Aprt	-0.0661605	-0.426901
	Aptx	0.0852393	-0.144637
	Aqr	0.034217	-0.286532
	Araf	-0.164102	-0.358936
	Arap1	-0.381581	-0.360028
	Arap2	0.120242	-0.349922
	Arcn1	-0.0070468	-0.320271
	Arf1	-0.0359453	-0.355254
	Arf4	0.0887336	-0.248039
	Arf5	0.0800613	-0.158298
	Arf6	-0.0656911	-0.370117
	Arfgap1	-0.165642	-0.212969
	Arfgap2	0.0614186	-0.231899
	Arfgap3	-0.188012	-0.476932
	Arfgef1	0.0092352	-0.48927
	Arfgef2	0.0284681	-0.43406
	Arfgef3	-0.279061	-0.749631
	Arfip1	-0.100425	-0.294737
	Arfip2	-0.0634476	-0.279562
	Arfrp1	-0.109194	-0.23518
	Arglu1	-0.161788	-0.223018
	Arhgap1	-0.0490122	-0.291343
	Arhgap11a	0.0687493	-0.0486809
	Arhgap12	-0.0200678	-0.288725
	Arhgap15	0.240956	0.115572
	Arhgap17	-0.245014	-0.377333
	Arhgap18	-0.117416	-0.381602
	Arhgap19	0.129594	0.139426
	Arhgap21	-0.0769481	-0.303497
	Arhgap25	0.227348	-0.0416042
	Arhgap26	0.0952624	-0.0789771
	Arhgap27	-0.0512242	-0.0734802
	Arhgap30	-0.0549847	-0.180041
	Arhgap4	-0.067098	-0.292301
	Arhgap45	-0.133541	-0.19258
	Arhgap9	-0.066587	-0.183324
	Arhgdia	-0.0153944	-0.208252
	Arhgdib	0.0402917	-0.125913
	Arhgef18	0.225978	-0.202575
	Arhgef2	-0.207176	-0.346806
	Arhgef6	-0.0533209	-0.276281
	Arhgef7	-0.208025	-0.239267
	Arid1a	-0.0421418	0.319824
	Arid1b	0.136852	-0.0761926
	Arid2	-0.0242611	0.150954
	Arid3a	-0.0225703	-0.318238
	Arid4a	0.100337	-0.101402
	Arid4b	0.055218	0.00669408
	Arid5a	0.0787623	0.00788375
	Arih1	0.0315069	-0.287743
	Arih2	0.0156594	-0.306386
	Arl1	0.104093	-0.553647
	Arl14ep	-0.0931887	-0.33966
	Arl2	0.0185369	-0.48962
	Arl2bp	0.0853536	-0.0494752
	Arl3	0.0497152	-0.324702
	Arl4c	0.0535616	-0.625384
	Arl5a	0.130052	-0.384303
	Arl6	-0.0755553	-0.456847
	Arl6ip1	0.138601	-0.228644
	Arl6ip4	-0.0283584	-0.130954
	Arl6ip5	0.034472	-0.310526
	Arl6ip6	0.00809956	0.12715
	Arl8a	-0.0391662	-0.49056
	Arl8b	0.0556606	-0.351934
	Armc1	0.076195	-0.0835154
	Armc10	0.143299	-0.113479
	Armc6	-0.0089848	-0.431906
	Armc8	-0.0085073	-0.266121
	Armh3	0.00357173	-0.310323
	Armt1	0.0176318	-0.43807
	Arnt	0.0048167	-0.316382
	Arpc1a	0.0155985	-0.182033
	Arpc1b	-0.016986	-0.372183
	Arpc2	0.0258254	-0.27869
	Arpc3	-0.0125752	-0.317981
	Arpc4	0.0253959	-0.237802
	Arpc5	0.042965	-0.205295
	Arpc5l	-0.102521	-0.29647
	Arpp19	0.0342948	-0.24388
	Arrb1	0.14012	-0.581538
	Arrb2	-0.0378115	-0.336121
	Arrdc1	0.0282906	-0.373567
	Arsb	0.054525	-0.31652
	Asah1	-0.0325852	-0.545159
	Asap1	0.227714	0.354255
	Asb2	0.176903	-0.417233
	Asb3	0.108974	-0.762779
	Asb6	0.0492242	-0.59306
	Ascc1	0.139369	-0.340777
	Ascc2	-0.0498705	-0.396148
	Ascc3	-0.091377	-0.595819
	Asf1a	0.248481	-0.0859142
	Asf1b	0.200784	0.0777062
	Ash2l	0.0770128	-0.0799636
	Asl	-0.171923	-0.624649
	Asns	-0.268883	-0.793433
	Aspm	0.208808	-0.639556
	Aspscr1	-0.0062514	-0.116506
	Asrgl1	0.246978	-0.067338
	Ass1	-0.0809663	-0.258635
	Asxl2	0.014862	-0.447614
	Atad1	0.0527353	-0.325254
	Atad2	0.0788378	-0.106053
	Atad2b	0.0703664	-0.0315707
	Atad3a	-0.0869311	-0.129978
	Atad5	0.00033588	-0.0814894
	Ate1	0.0233846	-0.241547
	Atf2	0.113749	-0.0831346
	Atf7	-0.0412927	-0.247447
	Atf7ip	-0.127816	-0.225602
	Atg101	0.125969	0.153463
	Atg12	0.0886533	-0.327802
	Atg13	0.109875	-0.588669
	Atg16l1	-0.112986	-0.0895556
	Atg16l2	-0.0941233	-0.729017
	Atg2a	-0.0361793	-0.663708
	Atg2b	-0.148462	-0.462386
	Atg3	-0.0141308	-0.326156
	Atg4a	-0.0068878	-0.343653
	Atg4b	-0.0027871	-0.381358
	Atg5	0.0531425	-0.167197
	Atg7	-0.075651	-0.331286
	Atic	0.118791	-0.0326013
	Atl2	0.0694267	-0.138636
	Atl3	0.0785981	-0.20183
	Atm	0.0148488	-0.333774
	Atn1	0.134036	0.047271
	Atox1	-0.0151765	-0.426486
	Atp10a	-0.0027482	-0.425091
	Atp11b	0.056882	-0.339469
	Atp11c	0.0770108	-0.15175
	Atp13a1	-0.198134	-0.301758
	Atp13a3	0.0279908	-0.74352
	Atp1a1	0.0129098	-0.205947
	Atp1b3	0.133373	-0.0708411
	Atp2a1	0.187101	-0.836837
	Atp2a2	-0.093269	-0.321486
	Atp2a3	0.0977467	-0.149322
	Atp2b1	0.115201	-0.0584148
	Atp2b4	-0.0794634	-0.174291
	Atp2c1	-0.126236	-0.575274
	Atp5a1	0.0613746	-0.1465
	Atp5b	0.0680987	-0.166529
	Atp5c1	0.0735916	-0.114559
	Atp5d	-0.024782	-0.184448
	Atp5e	0.198364	-0.049311
	Atpif1	0.128347	-0.123209
	Atp5md	0.0489692	-0.0628079
	Atp5k	0.0470719	-0.0494471
	Atp5j2	0.134566	-0.0867873
	Atp5l	-0.0645907	-0.114804
	Atp5pb	0.059923	-0.165075
	Atp5h	0.101508	-0.111383
	Atp5j	0.048948	-0.259518
	Atp5o	0.0660953	-0.206907
	Atp6ap1	-0.0571071	-0.441475
	Atp6ap2	0.108301	-0.312609
	Atp6v0a1	-0.646386	-1.49693
	Atp6v0a2	-0.138739	-0.413492
	Atp6v0d1	-0.0206225	-0.300417
	Atp6v1a	-0.063211	-0.493633
	Atp6v1b2	-0.0789204	-0.423147
	Atp6v1c1	0.0312619	-0.489358
	Atp6v1d	0.0310826	-0.350601
	Atp6v1e1	-0.0391925	-0.318341
	Atp6v1f	0.0508043	-0.48913
	Atp6v1g1	0.0396797	-0.329056
	Atp6v1h	0.0978839	-0.180597
	Atp8b2	-0.126173	0.283
	Atp8b4	-0.114838	0.187607
	Atpaf1	0.054338	0.0189853
	Atpaf2	-0.0373721	-0.0308767
	Atr	-0.0770985	-0.548906
	Atrip	-0.0576479	-0.570635
	Atrx	-0.0515245	-0.266139
	Atxn1	-0.225338	-0.16586
	Atxn10	0.0389439	-0.367727
	Atxn2	-0.107233	0.580282
	Atxn2l	-0.12133	-0.210412
	Atxn3	0.0771292	0.22047
	Atxn7l3	0.0321322	-0.270871
	Auh	-0.101363	-0.17044
	Aup1	-0.0530848	-0.158673
	Aurka	0.0383775	-0.252295
	Aurkb	0.107028	0.434151
	Aven	0.0468281	-0.220714
	Avil	-1.58332	-1.58726
	Avl9	-0.0062673	-0.198209
	B2m	0.00962644	-0.308658
	B3galt6	0.135554	-0.501366
	B3gat3	-0.0717877	-0.840611
	B4galnt1	-0.0049583	-0.103262
	B4galt1	0.0153591	-0.514636
	B4galt5	-0.190372	-0.38447
	B4galt7	0.0256495	-0.116748
	Babam1	0.0627204	-0.143195
	Babam2	-0.0857017	-0.229011
	Bach2	0.167259	-0.53051
	Bag1	0.0246185	-0.0818964
	Bag2	0.040044	-0.0008775
	Bag4	0.0077582	-0.310784
	Bag5	0.102628	-0.537188
	Bag6	-0.0246465	-0.2933
	Baiap2	-0.091959	-0.371686
	Bak1	-0.0630264	-0.448019
	Banf1	0.0459166	-0.472091
	Banp	0.0902399	0.016721
	0610010K14Rik	-0.335783	-0.0947533
	Bard1	0.0493992	0.0370669
	Basp1	-0.609025	-0.579944
	Bax	0.0792704	-0.0417913
	Baz1a	-0.066026	-0.297044
	Baz1b	0.0507679	-0.0481408
	Baz2a	-0.130797	-0.0459829
	Bcap29	-0.0017256	-0.37148
	Bcap31	0.0708466	-0.223928
	Bcas2	0.0166853	-0.184675
	Bcas3	-0.039528	-0.0309736
	Bcat1	-0.0847477	-0.495478
	Bcat2	0.00060235	-0.192757
	Bccip	-0.0120302	-0.2424
	Bckdha	0.233967	0.0967969
	Bckdhb	-0.327705	0.254717
	Bckdk	0.0950714	-0.237284
	Bcl10	0.0622948	-0.235796
	Bcl11b	0.00151204	0.309915
	Bcl2	0.118235	-0.402219
	Bcl2l1	-0.122434	-0.294389
	Bcl2l11	0.0950258	0.0478528
	Bcl2l13	-0.0047296	-0.237331
	Bcl7b	0.0466549	-0.033551
	Bcl7c	0.0604147	-0.0545277
	Bclaf1	-0.0280954	-0.0502914
	Bcor	0.0870799	-0.713886
	Bcr	-0.516638	-0.661329
	Bcs1l	-0.237972	-0.162268
	Bdh1	0.0209305	-0.145714
	Becn1	-0.0607049	-0.52657
	Bend3	0.0472598	0.0973633
	Bet1	-0.0141308	0.756457
	Bhlhe40	-0.231934	-0.437244
	Bicd2	-0.0552276	-0.397249
	Bicra	-0.157763	0.974162
	Bid	-0.0178807	-0.108845
	Bin1	-0.130011	-0.298627
	Bin2	0.0661206	-0.233094
	Birc2	-0.0950195	0.094509
	Birc5	0.119648	-0.128377
	Birc6	-0.0674146	-0.385943
	AI837181	-0.0186804	-0.0701706
	Blm	-0.0215549	-0.434736
	Blmh	0.122357	-0.238174
	Bloc1s1	0.395823	0.0674848
	Bloc1s3	0.0265869	-0.389707
	Bloc1s4	-0.049781	-0.392147
	Bloc1s5	0.053671	0.136455
	Bloc1s6	0.0164121	-0.548837
	Blvra	0.035661	-0.343296
	Blvrb	-0.1671	-0.32835
	Bmp2k	0.0470234	-0.123441
	Bms1	-0.0759578	-0.191646
	Bnip1	0.0256393	-0.680736
	Bnip2	-0.100871	-0.583468
	Bnip3	-0.0938222	-0.154351
	Bod1l	-0.0526308	0.0691902
	Bola1	-0.151993	-0.152947
	Bola2	-0.0114589	-0.508352
	Bola3	0.072132	-0.559041
	Bop1	-0.0536869	-0.0737597
	Bora	-0.0644027	-0.216729
	Borcs5	-0.126736	-0.0727989
	Bphl	0.190454	-0.172464
	Bpnt1	0.00606625	-0.130555
	Bpnt2	0.00984067	-0.0193738
	Bptf	-0.0213303	-0.364509
	Brap	0.0319656	-0.155358
	Brat1	-0.130666	-0.453991
	Brca1	0.116234	-0.126831
	Brcc3	0.0223378	-0.162867
	Brd1	0.0487849	-0.154188
	Brd2	0.0645138	-0.0349217
	Brd3	0.16675	0.0866139
	Brd4	-0.0596307	0.0500779
	Brd7	-0.0280696	0.146231
	Brd8	-0.0458806	0.0981351
	Brd9	0.029738	0.0434155
	Brf1	-0.180774	0.557541
	Bri3bp	0.0013967	-0.162886
	Brip1	0.12217	-0.204735
	Brix1	0.0342953	-0.07996
	Brms1l	0.139694	-0.356548
	Brox	0.0747262	-0.190416
	Brpf1	-0.0473306	-0.282561
	Brwd1	-0.199304	-0.491732
	Bscl2	-0.113435	-0.830519
	Bsdc1	-0.105802	1.4561
	Bsg	-0.0446334	-0.430969
	Bspry	-0.163099	-0.424726
	Bst2	0.106442	-0.343981
	Btaf1	0.0948978	-0.347459
	Btbd1	0.0276338	-0.0818619
	Btd	-0.005399	-0.244511
	Btf3	0.0467191	-0.0791004
	Btf3l4	-0.0112207	0.0133358
	Bub1	0.0900039	0.246141
	Bub1b	0.126691	-0.0560925
	Bub3	0.0462371	-0.106937
	Bud13	0.0385063	-0.0062131
	Bud23	-0.0404505	-0.164585
	Bud31	-0.0057968	-0.405209
	Bysl	-0.034172	-0.274839
	Bzw1	0.077018	-0.254881
	Bzw2	0.118769	-0.203444
	C1d	0.103013	-0.440898
	C1galt1	-0.0735962	-0.354593
	C1galt1c1	-0.0505967	-0.447346
	C1qbp	0.0529263	-0.0978363
	C2cd2l	-0.140004	-0.578814
	C2cd5	0.0373107	-0.206891
	Car2	-1.51438	0.128161
	Caap1	0.0524864	-0.0668806
	Cab39	-0.020307	-0.309854
	Cab39l	0.00687586	-0.364312
	Cactin	-0.0463187	-0.595982
	Cacul1	0.076321	-0.163382
	Cacybp	0.0901468	-0.490051
	Cad	-0.0694455	-0.218673
	Calhm2	0.0156316	-0.121586
	Calhm6	0.309867	-0.527744
	Calm1	0.0629427	-0.373998
	Calr	-0.113897	-0.445207
	Calu	-0.0543821	-0.155479
	Camk1d	0.286434	0.208037
	Camk2d	0.252175	-0.0859359
	Camk2g	-0.102546	-0.141396
	Camk4	-0.0086517	-0.258151
	Cand1	0.0217489	-0.293685
	Cand2	-0.0332672	-0.432458
	Canx	-0.0021843	-0.21503
	Cap1	0.00120539	-0.316213
	Capg	-0.16696	-0.492538
	Capn1	-0.0152683	-0.202855
	Capn2	-0.237637	-0.556219
	Capn7	-0.0574997	-0.507977
	Capns1	-0.0101515	-0.41323
	Caprin1	0.0425961	-0.219822
	Capza1	0.0142289	-0.239933
	Capza2	0.0296468	-0.272451
	Capzb	-0.0303021	-0.25989
	Card11	-0.104768	-0.261499
	Card19	-0.218185	-0.47563
	Card6	0.326861	0.811379
	Carhsp1	0.113983	-0.562545
	Carm1	-0.0046203	-0.0618607
	Carmil2	0.106249	-0.243803
	Carnmt1	0.017875	-0.263593
	Cars	-0.143835	-0.477144
	Cars2	-0.0810285	-0.126754
	Casc3	0.0231912	0.00934411
	Casp1	0.0256999	-0.253128
	Casp2	0.210006	-0.0133152
	Casp3	-0.0502774	-0.516834
	Casp6	0.251194	-0.241806
	Casp7	0.261868	-0.368713
	Casp8	-0.0712114	-0.334963
	Casp8ap2	0.0547268	-0.335996
	Casp9	-0.235583	-0.304059
	Cast	-0.0225247	-0.329339
	Cat	0.0881947	-0.130509
	Cbl	-0.0828854	-0.1542
	Cblb	-0.196348	-0.481431
	Cbll1	0.0408055	0.0895038
	Cbr1	-0.179102	-0.393799
	Cbr4	-0.179401	-0.0787354
	Cbwd1	-0.089917	-0.123848
	Cbx1	0.0471974	-0.144646
	Cbx3	0.132915	0.0183121
	Cbx4	0.00155826	-0.118433
	Cbx5	0.0365313	0.0345768
	Cbx8	0.0495019	0.00211748
	Cc2d1a	-0.125999	-0.374382
	Cc2d1b	0.0898655	-0.0913011
	Ccar1	-0.0803676	-0.15356
	Ccar2	-0.196354	-0.152289
	Ccdc102a	0.0247342	-0.266979
	Ccdc115	0.0178002	-0.445822
	Ccdc12	-0.0054565	-0.0526641
	Ccdc124	-0.0041067	-0.252623
	Ccdc127	0.0544957	-0.447481
	Ccdc134	-0.317563	-0.293869
	Ccdc137	-0.0664524	0.0684161
	Ccdc167	0.0249718	-0.254839
	Ccdc174	-0.0370411	-0.126683
	Ccdc22	0.28366	-0.192233
	Ccdc25	-0.0537068	-0.348914
	Ccdc43	-0.0288914	-0.579974
	Ccdc47	-0.0317995	-0.274771
	Ccdc50	0.106909	-0.0485537
	Ccdc51	-0.0614215	-0.317322
	Ccdc58	-0.125465	-0.109342
	Ccdc6	-0.0962385	-0.27339
	Ccdc61	-0.0709285	-0.106261
	Ccdc69	-0.148992	-0.0816712
	Ccdc85c	0.157388	0.100077
	Ccdc86	-0.050033	-0.256332
	Ccdc88b	-0.127495	-0.263484
	Ccdc88c	-0.124577	-0.376165
	Ccdc9	-0.0587556	-0.0324637
	Ccdc92	0.376048	-0.661639
	Ccdc93	-0.0746572	-0.13056
	Ccdc97	-0.046049	-0.416123
	Ccl1	-0.209793	-0.127476
	Ccl4	-0.20432	-0.898206
	Ccm2	0.0127284	0.153059
	Ccna2	0.155569	-0.154936
	Ccnb1	0.100964	-0.158244
	Ccnb2	0.172116	-0.185927
	Ccnc	0.0626962	-0.680025
	Ccnd2	0.0133814	-0.641279
	Ccnd3	0.0608563	-0.958803
	Ccndbp1	0.0433293	-0.0192677
	Ccne1	0.0570985	-0.507581
	Ccnh	0.132749	-0.613775
	Ccnk	-0.0290312	0.0871221
	Ccnl1	-0.136292	-0.0400883
	Ccnl2	-0.348144	-0.319006
	Ccnt1	-0.0381618	-0.188467
	Ccnt2	-0.123015	0.240551
	Ccny	-0.0720116	-0.401601
	Ccr5	-0.0549406	-0.745624
	Ccs	-0.0339579	-0.155421
	Cct2	0.0329161	-0.265279
	Cct3	0.0735687	-0.257245
	Cct4	0.0578152	-0.259609
	Cct5	0.0898612	-0.266993
	Cct6a	0.0806948	-0.207818
	Cct7	0.0196695	-0.29525
	Cct8	0.0361169	-0.231806
	Ccz1	-0.0016188	0.452165
	Cd160	0.0770587	-0.307342
	Cd2	0.213907	-0.0209666
	Cd226	0.198204	-0.294992
	Cd244a	-0.43667	-0.87581
	Cd247	0.00628724	-0.300426
	Cd27	0.627894	1.11147
	Cd28	0.00951163	-0.245182
	Cd2ap	0.0747295	-0.0941292
	Cd2bp2	-0.0467109	-0.0245048
	Cd37	-0.107325	-0.257181
	Cd3d	0.0979236	-0.134576
	Cd3e	0.109713	-0.225739
	Cd3g	0.130946	-0.250303
	Cd44	0.0605247	-0.195661
	Cd48	0.14729	-0.0559241
	Cd5	0.368044	-0.0064807
	Cd6	0.141514	0.256361
	Cd69	-0.0695872	-0.670223
	Cd82	-0.0289757	-0.0357677
	Cd84	0.0863663	-0.214777
	Cd8a	-0.0089907	-0.256432
	Cd8b1	0.155337	-0.145962
	Cd96	0.0512152	-0.301839
	Cdan1	0.00950822	-0.157313
	Cdc123	0.0493729	-0.377412
	Cdc16	0.0023669	-0.257877
	Cdc20	0.166436	-0.0172809
	Cdc23	-0.0477067	-0.263053
	Cdc26	0.0674462	-0.262392
	Cdc27	0.00422539	-0.383156
	Cdc34	0.038107	-0.34605
	Cdc37	0.0536106	-0.0440424
	Cdc37l1	-0.118477	-0.427693
	Cdc40	0.130504	3.09e-05
	Cdc42	0.0557559	-0.328775
	Cdc42se2	0.0361633	-0.266725
	Cdc45	-0.0212935	-0.250243
	Cdc5l	0.170984	-0.107695
	Cdc73	0.00468433	-0.0962953
	Cdca2	0.043851	0.209127
	Cdca3	0.140446	-0.161035
	Cdca5	0.199269	0.409693
	Cdca7	0.183886	1.03832
	Cdca7l	0.29114	0.212294
	Cdca8	0.159254	0.105581
	Cdh1	-0.238563	-0.656929
	Cdipt	-0.100832	-0.302177
	Cdk1	0.0911622	-0.105338
	Cdk11b	-0.110374	-0.126103
	Cdk12	-0.043538	-0.533658
	Cdk13	0.0293425	-0.18675
	Cdk17	0.0117322	-0.215227
	Cdk19	0.246075	-0.581165
	Cdk2	0.105415	-0.116013
	Cdk2ap1	-0.0799404	-0.448342
	Cdk4	0.145074	-0.0887973
	Cdk5	0.0152152	-0.128076
	Cdk5rap1	-0.157204	-0.373142
	Cdk5rap2	-0.106112	-0.548471
	Cdk5rap3	0.02864	-0.426977
	Cdk6	0.00841969	0.0503279
	Cdk7	-0.0159072	-0.208651
	Cdk9	-0.0656481	-0.325798
	Cdkal1	0.0213399	-0.540027
	Cdkn1a	0.0343976	-0.69692
	Cdkn1b	0.195478	0.310949
	Cdkn2a	0.105067	-1.08554
	Cdkn2aip	0.114897	0.0108097
	Cdkn2b	-0.0332296	-0.753957
	Cdkn2d	0.0868469	-0.384572
	Cds2	-0.0630849	-0.391499
	Cdv3	-0.0576082	-0.144579
	Cdyl	-0.149906	-0.500537
	Cdyl2	-0.229544	-0.366475
	Cebpz	0.00774259	-0.279895
	Cebpzos	0.104562	-0.116592
	Celf1	0.0354801	-0.157345
	Celf2	0.0168384	-0.132818
	Cemip2	-0.255178	-1.06427
	Cenpa	0.00960874	-1.70635
	Cenpc1	0.0379312	0.074661
	Cenpe	-0.0281592	-0.210116
	Cenpf	0.124143	-0.178697
	Cenph	0.146103	-0.566418
	Cenpi	0.0967859	-0.142065
	Cenpk	0.247343	-0.377296
	Cenpl	0.195901	0.447683
	Cenpm	0.087373	0.260932
	Cenpp	0.130203	0.453322
	Cenpq	0.18113	-1.08774
	Cenps	0.146473	0.241539
	Cenpt	-0.0705209	-0.296166
	Cenpu	-0.0448814	-0.156248
	Cenpv	0.141978	-0.21922
	Cep120	0.0123066	-0.355768
	Cep128	0.103207	-1.69683
	Cep131	0.109146	0.669406
	Cep135	-0.0022874	-0.431172
	Cep152	0.0187749	-0.2401
	Cep170	-0.031701	-0.267105
	Cep192	-0.0230195	-0.994912
	Cep250	-0.159018	-0.446986
	Cep41	-0.148132	-0.280322
	Cep43	0.0664234	-0.100294
	Cep55	0.0873014	-0.109991
	Cep57	0.0974561	-0.15115
	Cep63	0.0813282	-0.0250803
	Cep76	0.0520082	-0.405841
	Cep85	-0.117823	-0.221288
	Cep97	0.0910875	-0.143799
	Cept1	0.0581344	-0.0954565
	Cers2	-0.131569	-0.42898
	Cers4	0.0654091	-0.1732
	Cers5	0.0530174	-0.681725
	Cert1	-0.0861727	-0.209937
	Cetn2	0.0802999	-0.22303
	Cetn3	0.0594746	-0.103871
	Cfap20	0.125788	-0.170564
	Cfap36	0.0009423	-0.396685
	Cfdp1	0.0527607	-0.0193934
	Cfl1	0.059397	-0.233789
	Cfp	-0.896456	-1.39831
	Cgas	0.0716165	-0.030165
	Cggbp1	0.0526696	-0.0011767
	Chaf1a	0.0615008	-0.211647
	Chaf1b	0.0409163	0.203649
	Champ1	0.0644471	-0.0529579
	Chchd1	0.105376	0.00868311
	Chchd3	0.0492091	-0.134082
	Chchd4	-0.0441973	-0.575867
	Chchd6	0.0266108	0.0426407
	Chd1	0.00601624	-0.210963
	Chd1l	0.0821323	-0.299191
	Chd2	-0.0262951	-0.372192
	Chd3	-0.0872008	-0.208213
	Chd4	-0.0937222	-0.122526
	Chd7	0.0499542	-1.67721
	Chd8	-0.0516964	-0.167155
	Chek1	0.198771	0.0843288
	Cherp	0.0110491	-0.368499
	Chfr	-0.0241307	-0.458966
	Chid1	-0.163987	-0.182069
	Chm	0.0559801	-0.559322
	Chmp1a	-0.0118186	-0.122492
	Chmp1b	0.0336929	-0.0053603
	Chmp2a	0.0915321	-0.214899
	Chmp2b	0.0200012	-0.0090684
	Chmp3	0.0847941	-0.248978
	Chmp4b	0.00251198	-0.199466
	Chmp5	-0.0376333	-0.372631
	Chmp6	0.0661207	0.0223798
	Chmp7	-0.0801135	-0.474532
	Chordc1	0.0631283	-0.197641
	Chp1	-0.0556166	-0.493447
	Chrac1	0.11368	-0.0578499
	Chst12	-0.215311	1.71522
	Chsy1	-0.120318	0.584392
	Chtf18	0.0523246	-0.208181
	Chtf8	0.1653	-0.222393
	Chtop	0.11983	0.0482566
	Chuk	-0.0737899	-0.457233
	Churc1	-0.097626	-0.14181
	Ciao1	0.154177	-0.36671
	Ciao2a	-0.005762	-0.277453
	Ciao2b	-0.0397093	-0.390874
	Ciao3	-0.0896658	-0.351751
	Ciapin1	-0.0453139	-0.29738
	Cib1	0.140035	-0.589942
	Cic	-0.112892	-0.601116
	Cinp	-0.0741938	-0.213144
	Cip2a	0.149303	-0.0858435
	Cirbp	0.127685	-0.180768
	Cisd1	-0.0602736	-0.358062
	Cisd2	-0.0047509	-0.232363
	Cisd3	-0.192299	-1.19933
	Cish	-0.115363	-0.300373
	Cit	-0.0711541	-0.0367287
	Ciz1	0.0278936	0.38946
	Ckap2	0.0588329	-0.160387
	Ckap2l	0.129096	0.330168
	Ckap5	0.0599274	-0.171999
	Ckb	0.223349	-0.196199
	Cks1b	0.142387	-0.0838016
	Cks2	0.147812	-0.0015747
	Clasp1	-0.0636553	-0.218238
	Clasrp	-0.179646	0.104054
	Clcc1	-0.017568	-0.165539
	Clcn3	0.0265713	-0.273247
	Clcn5	-0.151761	-0.655789
	Cldnd1	0.186032	-0.388972
	Clec2d	-0.0617068	-0.245912
	Clic1	0.0721938	-0.2183
	Clic4	-0.0871295	-0.477672
	Clint1	-0.0095541	-0.0407085
	Clip1	0.0214833	-0.534077
	Clk1	-0.0483391	-0.60818
	Clk3	-0.123359	-0.263784
	Cln5	-0.042968	-0.341287
	Clns1a	0.105198	-0.324151
	Clp1	0.0402779	-0.239809
	Clpb	0.0547475	-0.590887
	Clpp	-0.0504558	-0.130623
	Clptm1	-0.0037769	-0.227991
	Clptm1l	-0.137997	-0.594714
	Clpx	-0.0552243	-0.306409
	Clspn	0.12626	0.126909
	Clta	0.07649	-0.177479
	Cltb	-0.0168945	-0.200274
	Cltc	-0.141821	-0.37733
	Cluh	-0.0785624	-0.278856
	Clybl	0.26971	0.257111
	Cmah	0.38779	2.88474
	Cmas	-0.0865409	-0.363643
	Cmc1	-0.0115366	-0.205192
	Cmc2	-0.0903131	-0.450709
	Cmip	-0.160633	-0.694875
	Cmpk1	-0.0567219	-0.469234
	Cmpk2	0.258624	0.9165
	Cmss1	0.16248	-0.0551942
	Cmtm6	0.0403512	-0.428024
	Cmtm7	-0.0009165	-0.301631
	Cmtr1	-0.264321	-0.224514
	Cnbp	0.0542681	-0.583722
	Cndp2	0.0617045	-0.182201
	Cnep1r1	0.0473374	-0.214108
	Cnn2	0.0089762	-0.213197
	Cnnm3	0.0404193	-0.217883
	Cnot1	-0.0312138	-0.265824
	Cnot10	0.0412281	-0.275928
	Cnot11	0.101402	-0.314694
	Cnot2	-0.0062189	-0.0916842
	Cnot3	-0.085781	-0.158865
	Cnot4	-0.0211613	-0.324162
	Cnot6	0.0205359	-0.228724
	Cnot6l	0.108619	-0.221814
	Cnot7	-0.0477557	-0.289858
	Cnot8	0.116362	-0.284688
	Cnot9	0.125693	-0.355882
	Cnp	0.033692	-0.27162
	Cnpy2	0.0581121	-0.221229
	Cnpy3	-0.0159784	-0.606225
	Cnpy4	0.0153389	-0.317134
	Cnrip1	0.251631	-0.288255
	Cnst	-0.132049	-0.12942
	Cntrl	-0.0347236	-0.378776
	Cntrob	-0.130109	-0.845987
	Coa3	0.102497	-0.117553
	Coa6	0.109297	-0.0365068
	Coa7	0.169901	0.162869
	Coasy	-0.0783194	-0.251467
	Cobll1	0.0985159	-0.235998
	Cog1	-0.154291	-0.0415572
	Cog2	0.0175961	0.0743984
	Cog3	-0.0110052	-0.351406
	Cog4	-0.0607219	-0.136164
	Cog5	0.100378	-0.126078
	Cog6	-0.0894227	-0.135297
	Cog7	-0.0539016	0.120207
	Cog8	0.0750981	-0.29542
	Coil	0.0978391	-0.230502
	Colgalt1	-0.0167875	-0.276763
	Commd1	0.0552731	-0.345028
	Commd10	0.0761582	-0.219398
	Commd2	0.0134685	-0.45014
	Commd3	-0.0061952	-0.672022
	Commd4	-0.0559073	-0.14216
	Commd6	0.0450474	-0.351338
	Commd7	0.00532281	-0.491439
	Commd8	0.0510205	0.333846
	Commd9	0.0550146	-0.401857
	Comt	-0.0733798	-0.409005
	Comtd1	-0.110285	-0.139237
	Copa	-0.0190207	-0.356932
	Copb1	0.00669667	-0.43543
	Copb2	0.0128673	-0.271748
	Cope	-0.0445413	-0.351014
	Copg1	-0.0812474	-0.403236
	Copg2	-0.0164009	-0.479527
	Cops2	0.119437	-0.346217
	Cops3	0.111237	-0.321065
	Cops4	0.0221732	-0.278255
	Cops5	-0.0041133	-0.39201
	Cops6	0.0452857	-0.33118
	Cops7a	0.0414898	-0.153225
	Cops7b	-0.0091606	-0.246821
	Cops8	-0.0007584	-0.181783
	Copz1	-0.0022001	-0.354363
	Coq3	-0.149141	-0.0135551
	Coq5	-0.0759805	-0.212794
	Coq6	-0.141055	0.934413
	Coq7	0.00120783	-0.233832
	Coq9	-0.0415021	-0.169578
	Coro1a	0.150358	-0.111571
	Coro1b	0.108102	-0.20789
	Coro1c	-0.0214066	-0.246972
	Coro2a	0.0611972	-0.0209984
	Coro7	0.187841	0.0908259
	Cotl1	-0.0677668	-0.323656
	Cox15	-0.0705227	-0.229118
	Cox16	-0.0708688	-0.113532
	Cox17	-0.196777	-0.717297
	Cox20	0.0414688	-0.0732677
	Cox4i1	0.0766815	-0.0820617
	Cox5a	0.0735354	-0.2972
	Cox5b	0.0717191	-0.341389
	Cox6a1	0.0727166	-0.451477
	Cox6b1	0.0807123	-0.02591
	Cox6c	0.0984216	0.026485
	Cox7a2	0.0731857	-0.419403
	Cox7a2l	0.12235	-0.217159
	Cox7c	0.0828619	-0.176709
	Cpeb4	-0.322122	-0.988838
	Cpne2	-0.0856981	-0.309654
	Cpne3	0.180895	-0.114886
	Cpox	0.128131	-0.163289
	Cpped1	-0.128281	-0.52671
	Cpsf1	-0.0608907	-0.153314
	Cpsf2	-0.0175871	-0.21681
	Cpsf3	-0.0191586	-0.155901
	Cpsf6	0.03374	-0.110659
	Cpsf7	-0.0278407	-0.132762
	Cpt1a	0.128182	0.0588088
	Cpt2	-0.161303	-0.0516052
	Cr1l	0.0311365	-0.395464
	Cradd	0.321445	-0.0821493
	Crbn	0.0356522	0.0938912
	Crcp	-0.0051419	-1.02799
	Creb1	0.252036	0.112046
	Crebbp	-0.0086997	-0.191009
	Creg1	-0.108238	-0.688486
	Creld2	-0.155976	-0.342423
	Crip1	0.424985	0.141563
	Crip2	0.334397	0.00354996
	Cript	0.0715939	-0.127348
	Crk	0.0599987	-0.266168
	Crkl	0.0243936	-0.192661
	Crlf2	-0.0455374	-0.438318
	Crlf3	0.0684415	-0.266065
	Crmp1	0.202711	-0.0127052
	Crnkl1	0.140996	-0.154249
	Crocc	0.258006	-0.772437
	Crot	0.0122537	-0.4091
	Crtam	0.0352953	-1.18795
	Crtc2	-0.14953	0.184181
	Crtc3	-0.0357707	-0.175713
	Cry1	-0.0350284	-0.678527
	Crybg1	0.0699851	-0.3695
	Cryl1	0.574998	-0.0429068
	Cryz	-0.0930454	-0.078482
	Cryzl1	-0.100643	-0.34807
	Cs	-0.0184099	-0.229035
	Csde1	0.0207758	-0.240007
	Cse1l	0.0238602	-0.166821
	Csk	0.123319	-0.0464219
	Csnk1a1	-0.0182616	-0.301341
	Csnk1d	0.0131561	-0.16379
	Csnk1g1	-0.0442202	-0.363422
	Csnk1g2	-0.0018302	-0.0923421
	Csnk1g3	-0.117511	-0.186553
	Csnk2a1	-0.0498865	-0.296839
	Csnk2a2	-0.0155916	-0.266255
	Csnk2b	-0.0182366	-0.128684
	Csrp1	0.234885	-0.17017
	Cst3	0.139452	-0.180587
	Cst7	0.0687339	0.0319202
	Cstb	-0.0853377	-0.395037
	Cstf1	-0.0415331	-0.190888
	Cstf2	0.0266829	-0.199489
	Cstf2t	0.0384872	-0.143429
	Cstf3	-0.000101	0.121028
	Ctbp1	0.0779507	-0.0895948
	Ctbs	-0.117987	-0.628911
	Ctc1	-0.0337608	-0.183138
	Ctcf	0.0787589	0.00062835
	Ctdp1	0.147236	-0.0795566
	Ctdsp1	0.146611	0.404193
	Ctdspl2	0.0904555	-0.175039
	Ctla2a	-0.0419939	-0.534532
	Ctla4	0.701153	-0.525169
	Ctnna1	-0.207097	-0.474297
	Ctnnb1	0.0719434	-2.24423
	Ctnnbl1	0.0675303	-0.159772
	Ctps	-0.0686968	-0.303991
	Ctps2	0.0280031	-0.165578
	Ctr9	0.00716325	-0.234959
	Ctsa	0.0992151	-0.146513
	Ctsb	0.0651212	-0.297207
	Ctsc	0.0924205	-0.234825
	Ctsd	-0.278671	-0.609996
	Ctss	0.497393	0.441847
	Ctsw	0.0203666	-0.304508
	Ctsz	0.0888931	0.0553867
	Ctu1	-0.23055	-0.548476
	Ctu2	-0.070495	-0.242609
	Cul1	-0.0541812	-0.23981
	Cul2	0.0233134	-0.358754
	Cul3	0.0115996	-0.270973
	Cul4a	-0.0265164	-0.288955
	Cul4b	0.0519993	-0.313357
	Cul5	-0.0243611	-0.260166
	2210016L21Rik	-0.0648831	-0.148696
	Cuta	-0.0865077	-0.473686
	Cux1	-0.0203951	-0.281467
	Cwc15	0.0821565	-0.282339
	Cwc22	0.0181065	-0.302253
	Cwc25	0.0639774	-0.18571
	Cwc27	-0.0642125	-0.0253889
	Cwf19l1	0.00526911	-0.245088
	Cwf19l2	0.0460613	-0.142029
	Cxcr3	0.376399	0.955188
	Cxcr4	0.984357	0.00051958
	Cxcr6	0.140614	-0.427602
	Cxxc1	-0.0067538	-0.0266872
	Cyb5a	0.102168	-0.259852
	Cyb5b	-0.0746883	-0.412212
	Cyb5r1	-0.160031	-0.0829193
	Cyb5r3	-0.0650587	-0.240176
	Cyb5r4	0.0610833	-0.235656
	Cyba	0.0404903	-0.387805
	Cybc1	0.00562553	-0.282966
	Cyc1	0.0480398	-0.253888
	Cycs	-0.0470102	-0.326253
	Cyfip1	-0.217186	-0.278832
	Cyfip2	-0.0533028	-0.288695
	Cyhr1	0.0766311	-0.485483
	Cyld	0.0667888	-0.19803
	Cyp20a1	0.017494	-0.457585
	Cyp51	0.00012226	-0.40768
	Cyria	0.28479	-0.134294
	Cyrib	0.0699418	-0.217266
	Cyth1	0.169839	-0.0196343
	Cyth4	-0.169509	-0.108982
	Cytip	0.27624	0.653001
	Czib	-0.0846902	-0.298098
	D10Wsu102e	0.0554711	-0.123224
	D6Wsu163e	-0.0081298	-0.417162
	D8Ertd738e	0.0110282	-0.394653
	Dad1	0.0267231	-0.406388
	Daglb	-0.0730501	-0.957077
	Dalrd3	-0.0740224	-0.422962
	Dap	0.0397863	-0.449443
	Dap3	0.0642741	-0.156388
	Dapk2	0.160348	-0.175727
	Dapk3	0.0364472	-0.268631
	Dars	0.0608085	-0.244533
	Dars2	0.0979334	0.234353
	Daxx	-0.0381115	0.0940569
	Dazap1	0.00927567	-0.138852
	Dbi	0.030548	-0.413118
	Dbnl	0.0783342	-0.159475
	Dbr1	0.0387903	-0.145517
	Dbt	-0.234791	-0.464631
	Dcaf1	0.0586717	-0.165268
	Dcaf11	-0.133033	-0.574203
	Dcaf13	-0.0068767	-0.265716
	Dcaf5	-0.0724836	-0.282116
	Dcaf7	0.042916	-0.0140285
	Dcaf8	-0.108168	-0.160251
	Dcakd	-0.0444241	-0.377848
	Dck	0.1789	-0.146677
	Dcp1a	-0.0495415	-0.343723
	Dcp1b	-0.0094937	-0.421964
	Dcp2	-0.0481489	-0.828284
	Dcps	0.103322	-0.222332
	Dctn1	-0.0176035	-0.924606
	Dctn2	0.0460096	-0.187937
	Dctn3	0.0535672	-0.258338
	Dctn4	0.0763179	-0.355817
	Dctn5	-0.0969666	-0.136593
	Dctn6	-0.0206037	-0.249456
	Dctpp1	0.086143	-0.503288
	Dcun1d1	0.0317968	-0.267581
	Dcun1d3	-0.110866	-0.837705
	Dcun1d5	0.0740772	-0.0425089
	Dcxr	-0.0679818	0.769715
	Dda1	-0.075363	-0.413408
	Ddb1	-0.0170628	-0.269579
	Ddb2	0.0262224	0.0792112
	Ddhd2	-0.101108	-0.555042
	Ddi2	0.0286205	-0.125172
	Ddost	-0.0332756	-0.36766
	Ddrgk1	0.0283374	-0.31505
	Ddt	-0.0697702	-0.263313
	Ddx1	-0.005372	-0.251755
	Ddx10	0.0413945	-0.25517
	Ddx11	-0.207695	-0.340185
	Ddx17	-0.142071	-0.246239
	Ddx18	0.0287337	-0.32793
	Ddx19a	0.045118	-0.304555
	Ddx19b	-0.0632992	-0.493429
	Ddx20	-0.005896	-0.235698
	Ddx21	0.0257425	-0.252434
	Ddx23	-0.0341657	-0.175965
	Ddx24	0.012155	-0.313522
	Ddx27	0.0264792	-0.213503
	Ddx28	0.0310047	-0.137815
	Ddx31	0.048898	-0.398142
	Ddx39a	0.0523834	-0.200487
	Ddx39b	-0.0354484	-0.125289
	Ddx3x	0.0133772	-0.301005
	Ddx3y	-0.0258937	-0.291079
	Ddx41	-0.0182978	-0.20035
	Ddx42	0.00947307	-0.1063
	Ddx46	-0.0020486	-0.209215
	Ddx47	0.0234464	-0.218968
	Ddx49	-0.0219017	-0.402426
	Ddx5	0.00282216	-0.228938
	Ddx50	-0.0130177	-0.260507
	Ddx51	-0.0912694	-0.297242
	Ddx52	0.0404389	-0.344133
	Ddx54	-0.0770832	-0.273743
	Ddx55	0.0680699	-0.144827
	Ddx56	-0.0112277	-0.0770924
	Ddx58	-0.0721129	-0.885832
	Ddx59	-0.0203408	-0.303882
	Ddx6	0.00027701	-0.222899
	Decr1	0.215955	-0.211667
	Decr2	-0.0207231	-0.731164
	Def6	-0.0657936	-0.118104
	Degs1	-0.0878273	-0.206654
	Dek	0.138064	0.0489777
	Dennd10	-0.0862426	-0.254557
	Dennd11	-0.336326	-0.768698
	Dennd1b	-0.0847115	-0.250649
	Dennd1c	-0.268923	-0.173175
	Dennd2d	-0.128821	-0.40017
	Dennd3	-0.738993	-0.263348
	Dennd4a	0.171162	-0.313091
	Dennd4b	-0.216384	-0.310366
	Dennd4c	-0.156275	-0.364976
	Denr	-0.0572403	0.0008993
	Depdc1b	0.240531	-0.220342
	Depdc5	-0.0576803	-0.0769567
	Dera	0.0869722	-0.392323
	Derl1	-0.0362578	-0.480751
	Chtf8	0.1653	-0.127729
	Desi1	-0.0595351	-0.502244
	Dffa	-0.0520952	-0.12812
	Dffb	0.104902	0.547617
	Dgat1	-0.237818	-0.392694
	Dgcr8	0.0912634	-0.0724895
	Dgka	0.128212	-0.420568
	Dgkh	-0.453062	-2.76156
	Dgkz	-0.0591745	0.13062
	Dglucy	0.12119	-0.0256098
	Dguok	0.0915378	-1.05847
	Dhcr24	-0.0416267	-0.552101
	Dhcr7	-0.0160389	-0.196435
	Dhfr	0.11245	-0.105773
	Dhodh	-0.0541993	-0.154927
	Dhps	-0.0436383	-0.312593
	Dhrs1	0.102654	-0.288151
	Dhrs11	-0.145201	-1.0219
	Dhrs13	-0.0099681	-0.348768
	Dhrs4	0.0732621	-0.0802306
	Dhrs7	0.099288	-0.086539
	Dhrs7b	0.0360917	-0.161269
	Dhx15	0.0581954	-0.20206
	Dhx16	0.0336587	-0.132575
	Dhx29	-0.0710588	-0.49747
	Dhx30	-0.079556	-0.251778
	Dhx33	-0.103822	-0.207776
	Dhx34	0.0641075	-0.15909
	Dhx35	0.080638	-0.179367
	Dhx36	0.0249838	-0.315397
	Dhx37	-0.153981	-0.187245
	Dhx38	0.0582876	-0.125231
	Dhx40	0.157837	-0.473199
	Dhx57	-0.0294615	-0.312449
	Dhx58	-0.0350299	-0.410695
	Dhx8	-0.0538803	-0.183062
	Dhx9	0.0495787	-0.157644
	Diablo	-0.165155	-0.0602723
	Diaph1	-0.0544537	-0.311768
	Diaph2	-0.0248871	-0.126668
	Diaph3	0.177707	-0.189578
	Dicer1	-0.0399712	-0.207364
	Dido1	-0.0892519	-0.214243
	Utp25	0.0323267	-0.372337
	Dimt1	-0.112214	-0.223455
	Dip2b	-0.214471	-0.209409
	Dipk2a	0.117693	-0.0570011
	Dis3	0.056228	-0.17989
	Dis3l	0.0446953	-0.409409
	Dis3l2	-0.0175271	-0.286982
	Dkc1	0.0500554	-0.109037
	Dlat	-0.162375	-0.309165
	Dld	0.0873932	-0.191035
	Dlg1	-0.0425629	-0.245099
	Dlgap4	-0.183271	-0.44131
	Dlgap5	0.129187	-0.0294237
	Dlst	0.0578461	-0.0434388
	Dmac2	0.0527825	-0.334982
	Dmap1	-0.0269969	-0.227749
	Dmxl1	-0.0244519	-0.441774
	Dna2	-0.0549727	-0.395284
	Dnaaf5	0.00381612	-0.398494
	Dnaja1	0.0724535	-0.362349
	Dnaja2	0.0457206	-0.242982
	Dnaja3	-0.0893049	-0.188482
	Dnajb1	0.123409	-0.188097
	Dnajb11	-0.0939094	-0.306028
	Dnajb12	-0.0711326	-0.124407
	Dnajb4	-0.296996	-0.136333
	Dnajb6	-0.0587873	-0.244899
	Dnajc1	-0.100204	-0.395326
	Dnajc10	-0.062994	-0.600693
	Dnajc11	-0.179891	-0.473377
	Dnajc13	-0.0817092	-0.343083
	Dnajc15	-0.0704156	-0.339638
	Dnajc17	0.026318	-0.337415
	Dnajc19	0.0626797	-0.0093227
	Dnajc2	0.0110524	-0.174222
	Dnajc21	-0.0428865	-0.293998
	Dnajc24	0.0667088	-0.336404
	Dnajc3	0.0255012	-0.232083
	Dnajc5	-0.0588175	-0.39147
	Dnajc7	-0.0051744	-0.197256
	Dnajc8	0.0543829	-0.138852
	Dnajc9	0.0597437	0.0389539
	Dnm2	-0.0642122	-0.293275
	Dnm3	-0.445627	-0.752257
	Dnmt1	0.0583278	-0.0362083
	Dnmt3a	-0.182661	-0.0532466
	Dnmt3b	0.0535527	0.267599
	Dnpep	0.0508591	-0.277818
	Dnph1	0.394339	0.0290413
	Dnttip1	0.0623936	-0.258022
	Dnttip2	0.0218187	-0.167379
	Dock11	0.138465	-0.129705
	Dock2	-0.0017172	-0.233822
	Dock5	-0.43964	-0.627768
	Dock8	-0.254334	-0.313547
	Dock9	-0.234819	-0.234532
	Dohh	0.043046	-0.386115
	Dok1	0.0068124	0.229041
	Dok2	-0.189315	-0.300114
	Dolpp1	-0.188019	-0.641432
	Donson	0.089472	-0.206749
	Dop1a	-0.0926024	-0.669672
	Dop1b	-0.253443	-0.38389
	Dpagt1	0.0180124	-0.518087
	Gm17018	0.0841016	-0.436954
	Dpf2	-0.0163918	0.0589513
	Dph1	-0.114275	-0.339733
	Dph2	-0.0587627	-0.216246
	Dph5	-0.0027999	-0.341782
	Dph6	-0.103847	-0.552742
	Dph7	-0.0041943	-0.083336
	Dpm1	-0.32417	-0.194075
	Dpm3	0.132064	0.0347292
	Dpp3	-0.083482	-0.288856
	Dpp4	0.103663	-0.0358875
	Dpp7	0.0919253	0.357203
	Dpp8	-0.0111778	-0.497524
	Dpp9	-0.0581763	-0.248502
	Dpy19l1	0.0634027	-0.22646
	Dpy30	0.0209189	-1.13872
	Dpysl2	0.0543382	-0.0632175
	Dr1	0.0369942	-0.155288
	Drap1	0.0982763	-0.357376
	Drg1	0.0366765	-0.281503
	Drg2	-0.0057678	-0.299173
	Drosha	-0.0603277	-0.0891933
	Dscc1	0.117403	-0.111965
	Dsn1	0.0332739	-0.202577
	Dsp	-0.412676	-1.62432
	Dst	0.312624	-0.566668
	Dstn	0.125574	-0.392018
	Dtd1	0.154399	-0.211849
	Dtd2	-0.0497916	-0.537744
	Dtl	0.159284	0.0593401
	Dtnb	-0.0005828	0.0828824
	Dtx3l	0.194109	-0.319035
	Dtymk	0.0459905	-0.149778
	Dus1l	-0.0849659	0.452196
	Dus2	-0.284173	-0.423159
	Dus3l	-0.11677	-0.164359
	Dusp11	0.0306882	-0.229773
	Dusp12	-0.0919066	-0.41214
	Dusp3	-0.184875	-0.649547
	Dusp5	-0.0985402	-0.783224
	Dusp6	-0.0392371	-0.351722
	Dut	0.0692743	-0.148153
	Dvl2	0.0354942	-0.223068
	Dxo	-0.0591147	-0.41967
	Dym	-0.0969601	-0.396923
	Dync1h1	-0.0766651	-0.280739
	Dync1i2	0.0446301	-0.175146
	Dync1li1	-0.0673501	-0.450352
	Dync1li2	-0.181877	-0.311758
	Dynll1	-0.0127932	-0.494706
	Dynll2	0.0268821	-0.161335
	Dynlrb1	-0.0062647	-0.276522
	Dyrk1a	0.0890642	0.299014
	E2f3	-0.0890285	-0.148283
	E2f4	-0.0792994	-0.291418
	E2f8	0.0668365	0.0364172
	Eaf1	-0.217687	-0.204061
	Ears2	-0.128865	-1.13307
	Ebag9	6.04e-05	-0.51207
	Ebna1bp2	0.030878	-0.253057
	Ebp	-0.0446813	-0.0813274
	Ecd	-0.0462373	-0.362263
	Ech1	-0.0633335	-0.413684
	Echdc1	-0.03684	-0.261623
	Echs1	0.028286	-0.134545
	Eci1	-0.109474	-0.281376
	Eci2	-0.0329284	-0.441997
	Ecpas	-0.0528158	-0.301765
	Ecsit	-0.0017512	0.0824257
	Ect2	0.17007	-0.273649
	Edaradd	-0.270842	0.0308436
	Edc3	0.0286924	-0.254667
	Edc4	-0.126768	-0.281429
	Edem1	-0.173242	-0.0751023
	Edem2	-0.155266	-0.429386
	Edem3	-0.0619826	-0.361125
	Edf1	-0.0672096	-0.151838
	Edrf1	-0.0384135	-0.784515
	Eea1	-0.180706	-0.304742
	Eed	0.093103	-0.109744
	Eef1a1	0.0848264	-0.43129
	Eef1akmt1	-0.079163	-0.43237
	Eef1akmt2	0.0617434	-0.215568
	Eef1aknmt	0.0798967	-0.410059
	Eef1b2	0.0564913	-0.316359
	Eef1d	-0.0239776	-0.319994
	Eef1e1	0.0249089	-0.39604
	Eef1g	0.00442334	-0.391003
	Eef2	-0.0068265	-0.364635
	Eef2kmt	0.0793821	-0.913098
	Eefsec	0.0563746	-0.0810943
	Efhd2	-0.0019379	-0.183101
	Efl1	-0.164463	-0.541042
	Efr3a	0.0365597	-0.176233
	Eftud2	-0.0168757	-0.137453
	Egln1	0.0574327	-0.18313
	Egr1	-0.137896	-0.520917
	Egr3	0.0203739	-1.66173
	Ehbp1l1	-0.36693	-1.22695
	Ehd1	-0.0975907	-0.356418
	Ehd3	0.316314	-0.430439
	Ehd4	-0.136585	-0.442344
	Ehhadh	-0.103803	-0.43639
	Ehmt1	0.0630879	-0.426698
	Ehmt2	-0.0121739	0.00380086
	Ei24	0.0341059	-0.27523
	Eif1	-0.0914377	-0.450305
	Eif1a	-0.0238301	-0.247863
	Eif1ad	0.0105995	-0.293139
	Eif1ax	0.0554043	-0.380142
	Eif1b	-0.0468298	-0.645444
	Eif2a	0.0755289	0.0827583
	Eif2ak2	-0.092821	-0.357306
	Eif2ak3	-0.196185	-0.811885
	Eif2ak4	-0.0732442	-0.905019
	Eif2b1	-0.026971	-0.374969
	Eif2b2	-0.0309281	-0.176253
	Eif2b3	-0.0743443	-0.356699
	Eif2b4	0.0235774	-0.255505
	Eif2b5	-0.0027118	-0.344703
	Eif2d	-0.0192941	-0.259167
	Eif2s1	0.0498709	-0.253912
	Eif2s2	-0.0368443	-0.26176
	Eif2s3x	0.0277835	-0.194339
	Eif2s3y	0.0870085	-0.228617
	Eif3a	-0.0023244	-0.300177
	Eif3b	-0.0166514	-0.226152
	Eif3c	-0.0330398	-0.319789
	Eif3d	0.0177378	-0.221055
	Eif3e	0.112768	-0.278973
	Eif3f	0.0315064	-0.324955
	Eif3g	-0.0210343	-0.199103
	Eif3h	0.114743	-0.331745
	Eif3i	0.0411712	-0.265897
	Eif3j1	0.0573145	-0.186257
	Eif3k	0.0686802	-0.281266
	Eif3l	0.0108846	-0.27657
	Eif3m	0.0882016	-0.418767
	Eif4a1	0.013809	-0.365057
	Eif4a2	-0.162223	-0.525628
	Eif4a3	0.0451306	-0.163406
	Eif4b	0.0327121	-0.0714763
	Eif4e	0.0212799	-0.286728
	Eif4e2	0.0341433	-0.752776
	Eif4e3	0.195058	0.00527543
	Eif4ebp2	0.056927	0.167701
	Eif4enif1	0.0189388	-0.125735
	Eif4g1	-0.0542027	-0.24
	Eif4g2	-0.0198477	-0.350708
	Eif4g3	-0.217393	-0.255912
	Eif4h	0.0225107	0.0143329
	Eif5	-0.100543	-0.924996
	Eif5a	0.0789038	-0.36737
	Eif5b	-0.043099	-0.621552
	Eif6	0.0225859	-0.407355
	Eipr1	0.0649827	-0.274198
	Elac2	-0.0807154	-0.305418
	Elavl1	-0.0151726	-0.102448
	Elf1	0.0601336	0.00308305
	Elf2	0.0339072	0.0242963
	Elf4	-0.0821647	-0.101667
	Ell	-0.0583715	-0.232282
	Elmo1	-0.0550601	-0.264838
	Elmo2	-0.290955	-0.42337
	Eloa	0.0449027	-0.110278
	Elob	0.0399471	-0.229521
	Eloc	0.0698324	-0.26559
	Elovl1	-0.1199	-0.170985
	Elovl5	0.116136	-0.277391
	Elp1	-0.0754538	-0.306052
	Elp2	0.0125123	-0.276216
	Elp3	0.0109823	-0.286769
	Elp4	0.0950031	-0.178222
	Elp5	-0.0137924	-0.344043
	Elp6	0.113547	-0.476612
	Emb	0.275517	-0.118973
	Emc1	-0.113323	-0.378758
	Emc10	0.0742963	-0.338211
	Emc2	0.0092578	-0.352093
	Emc3	0.0767417	-0.127904
	Emc4	0.0112318	-0.223922
	Emc6	0.0282726	-0.0832224
	Emc7	0.0987708	0.0215428
	Emc8	0.0946187	-0.255654
	Emd	0.102657	-0.0178312
	Eme1	0.0702535	-0.0476368
	Emg1	0.034272	-0.252721
	Emilin2	-0.236645	-0.313979
	Eml2	-0.037855	-0.241405
	Eml3	-0.0038298	-0.130378
	Eml4	0.0289931	-0.105648
	Emsy	0.0326906	-0.284147
	Enah	0.244981	0.181273
	Endod1	-0.113721	-0.629244
	Endog	0.0212691	-0.255258
	Engase	-0.131541	-0.345405
	Eno1	-0.0518325	-0.376277
	Eno3	0.263493	-0.515256
	Enoph1	0.0645406	-0.216131
	Enpp4	-0.0922893	-0.573595
	Ensa	-0.0108889	0.0222762
	Entpd1	-0.269557	-0.36462
	Entpd5	0.209415	0.954978
	Entpd6	0.0389304	0.0515495
	Eny2	0.0806292	-0.494553
	Eomes	-0.103503	-0.723124
	Ep300	-0.0311736	-0.105705
	Ep400	-0.0584067	-0.13684
	Epb41	-0.119564	-0.198193
	Epb41l2	0.0444872	-0.0677619
	Epc1	-0.0547878	-0.282445
	Epc2	0.0425073	-0.606125
	Epg5	-0.216363	-0.567286
	Ephx1	0.555261	0.277462
	Epm2aip1	-0.137214	-0.0042132
	Epn1	0.0359191	0.00387182
	Eprs	-0.0950706	-0.311726
	Eps15	-0.011954	-0.288487
	Eps15l1	-0.0231517	-0.270619
	Eps8	-0.356389	-0.291833
	Epsti1	0.0262153	-0.0502994
	Eral1	0.0574158	-0.336007
	Erap1	0.0545032	-0.240848
	Erbin	0.0389452	-0.154846
	Erc1	-0.1435	-0.362178
	Ercc1	-0.15571	-0.397502
	Ercc2	-0.186147	-0.59917
	Ercc3	0.014488	-0.419017
	Ercc4	-0.0717959	-0.484923
	Ercc6l	0.175723	1.06052
	Erg28	0.0425986	-0.106911
	Ergic1	-0.0501603	-0.202301
	Ergic2	-0.0868103	-0.336202
	Ergic3	0.00571166	-0.151512
	Erh	0.11174	-0.363373
	Eri1	0.135336	-0.100987
	Eri3	0.118244	0.204611
	Erich1	0.0830432	0.208154
	Erlec1	0.0176484	-0.0977939
	Erlin1	-0.0041236	0.501472
	Erlin2	-0.0958422	-0.279344
	Ermp1	-0.0931566	-0.556149
	Ero1a	-0.312147	-0.776967
	Ero1b	-0.0332018	-0.479509
	Erp29	0.0617384	-0.229082
	Erp44	-0.0075105	-0.169728
	Esco2	0.334143	-0.36626
	Esd	0.0284704	-0.341918
	Esf1	-0.0456464	-0.303444
	Espl1	0.0206092	-0.500629
	Esrra	-0.13568	-0.211094
	Ess2	-0.0380914	-0.143728
	Esyt1	-0.0145248	-0.20007
	Esyt2	-0.0563908	-0.831938
	Etf1	0.00375587	-0.301359
	Etfa	0.0906267	-0.288467
	Etfb	-0.0271808	-0.173239
	Etfdh	0.0643458	-0.165754
	Ethe1	0.135959	-0.150788
	Etnk1	-0.0633528	-0.40173
	Ets1	0.268937	-0.0525856
	Etv3	-0.0659324	-0.165888
	Etv6	0.0570703	-0.342093
	D16Ertd472e	0.085197	-0.205344
	Evi2	-0.462467	-0.296234
	Evl	-0.0891225	-0.273487
	Ewsr1	0.0128614	-0.108615
	Exoc1	-0.0454266	0.193177
	Exoc2	0.0189658	-0.150347
	Exoc3	0.138738	-0.25152
	Exoc4	0.0665012	-0.323135
	Exoc5	0.0155342	-0.472053
	Exoc6	-0.0402107	-0.275525
	Exoc7	0.0839545	-0.286545
	Exoc8	-0.0801303	0.1228
	Exog	0.144055	-0.433636
	Exosc1	-0.0520111	-0.140193
	Exosc10	0.0235108	-0.190591
	Exosc2	0.013331	-0.142579
	Exosc3	0.0314472	-0.264732
	Exosc4	-0.0046748	-0.327175
	Exosc5	0.00940279	-0.103164
	Exosc7	0.0207679	-0.217406
	Exosc8	0.0669745	-0.0284101
	Exosc9	-0.007688	-0.362048
	Ext2	0.0176376	-0.605178
	Eya3	0.0275904	-0.169304
	Ezh1	0.0148564	-0.985962
	Ezh2	0.115103	-0.122298
	Ezr	0.0683931	-0.256986
	F2r	-0.0543946	-0.204382
	F8a	0.143594	-0.0771678
	Faah	0.102855	-0.0014418
	Faap100	-0.0910397	-0.287054
	Fabp5	0.234601	0.0303319
	Fadd	0.00815512	-0.0698345
	Fads1	0.0572351	-0.313177
	Fads2	-0.132687	-0.430727
	Faf1	0.0694568	-0.260166
	Faf2	-0.0482725	-0.38782
	Fah	-0.646441	-1.38686
	Fahd2a	0.199373	-0.0642576
	Faim	-0.0259261	-0.448824
	Fam102a	-0.0655301	-0.210786
	Fam107b	-0.0088172	-0.248647
	Fam111a	0.0577593	-0.278761
	Fam114a1	-0.406553	-0.550002
	Fam114a2	-0.0272518	-0.456471
	Fam118a	0.0906618	-0.431576
	Fam118b	0.166784	0.131287
	Fam120a	-0.0029793	-0.191898
	Fam126a	0.0228402	-0.142683
	Fam133b	0.165484	0.11968
	Fam136a	-0.0523666	-0.330438
	Fam160b1	-0.0610336	-0.763403
	Fam162a	0.00415249	-0.161352
	Fam169b	0.0937426	-0.072275
	Fam172a	0.105669	-0.504244
	Fam185a	0.0292956	-0.119064
	Fam207a	0.0140495	-0.155856
	Fam20a	-0.40295	-0.720555
	Fam20b	-0.176988	-0.372443
	Fam210a	0.0938885	-0.440741
	Fam234b	-0.0225523	-0.54798
	Fam32a	0.1379	0.12452
	Fam3a	0.100964	-0.278807
	Fam3c	-0.0409793	-0.194311
	Fam50a	-0.0415714	-0.0720127
	Fam76a	0.0823386	-0.128478
	Fam76b	0.0624691	-0.0941833
	Fam91a1	-0.0341767	0.306088
	Fam98a	-0.0583074	-0.3366
	Fam98b	0.00891908	-0.192704
	Fam98c	-0.0100153	-0.142003
	Fanca	-0.12164	-0.344395
	Fancd2	-0.0007516	-0.172302
	Fanci	0.0670721	-0.101204
	Far1	0.0125005	-0.269964
	Farp1	-0.433433	-0.686196
	Fars2	0.0855786	-0.216472
	Farsa	-0.0254434	-0.405792
	Farsb	-0.0584453	-0.315998
	Fasn	-0.0728347	-0.302001
	Fastkd2	0.017589	-0.139209
	Fastkd5	-0.008502	-0.316232
	Fau	0.117322	-0.139093
	Fbl	0.107547	-0.287129
	Fbln1	0.269318	-0.150991
	Fbxl18	-0.289758	0.0197806
	Fbxl20	0.253575	-0.313554
	Fbxl6	-0.0142733	-0.342418
	Fbxl8	-0.0357059	-0.104894
	Fbxo22	-0.0357452	-0.194503
	Fbxo28	-0.137413	-0.240986
	Fbxo3	-0.0081499	-0.237689
	Fbxo30	-0.120114	-0.499998
	Fbxo33	0.0831541	-0.398371
	Fbxo38	-0.0445573	-1.24965
	Fbxo4	-0.0659481	-0.454514
	Fbxo42	0.0619678	-0.349773
	Fbxo5	0.129221	-0.187388
	Fbxo6	0.00149921	-0.828876
	Fbxo7	0.109318	0.305152
	Fbxo9	-0.205119	0.360924
	Fbxw11	-0.0126053	-0.362355
	Fcer1g	-0.841708	-1.25342
	Fcf1	0.0183722	-0.249627
	Fcho1	-0.132741	-0.344996
	Fdft1	-0.0689726	-0.675746
	Fdps	-0.167457	-0.603549
	Fdx1	-0.0960102	-0.367755
	Fdx2	0.0112252	-0.440077
	Fdxr	0.0557876	-0.515
	Fem1b	0.0914796	-0.542962
	Fen1	0.0815059	-0.102959
	Fermt3	0.0603994	-0.0957033
	Fgd3	-0.0795232	-0.260546
	Fgfr1op2	0.0470546	-0.265741
	Fgl2	-0.109395	-0.492108
	Fgr	-0.226534	-0.462449
	Fh1	0.114608	-0.197786
	Fhl2	-0.185899	-0.487454
	Fhl3	-0.177546	-0.209588
	Fhod1	-0.101914	-0.194033
	Fibp	-0.0918738	0.152206
	Fig4	0.0422391	-0.427927
	Filip1l	-0.129955	-0.374419
	Fip1l1	0.110039	-0.194616
	Fis1	0.117307	-0.47443
	Fiz1	0.0756265	0.446207
	Fkbp15	-0.0588495	-0.343474
	Fkbp1a	-0.068337	-0.353739
	Fkbp2	-0.0403089	-0.14062
	Fkbp3	0.0801381	-0.171518
	Fkbp4	0.0948085	-0.117279
	Fkbp5	-0.166559	-0.275115
	Fkbp8	-0.101989	-0.247712
	Flad1	-0.143338	-0.395859
	Fli1	-0.0351902	-0.0752198
	Flii	-0.010793	-0.350846
	Flna	-0.0329705	-0.316074
	Flnb	0.219722	0.209297
	Flot1	-0.0777955	-0.119134
	Flot2	0.250415	-0.12778
	Fmnl1	-0.126626	-0.29111
	Fmr1	0.0796218	-0.142461
	Fn3krp	-0.250003	-0.48297
	Fnbp1	-0.0001287	-0.145289
	Fnbp4	0.0146305	-0.0733947
	Fndc3a	-0.316254	-0.878707
	Fnta	0.0157755	-0.395756
	Fntb	0.0512513	-0.308406
	Focad	0.00776478	-0.924538
	Fosl2	-0.259981	-0.781393
	Foxj3	0.0191532	1.86778
	Foxk1	-0.108321	-0.158663
	Foxk2	-0.0226071	-0.0374038
	Foxo1	0.0235122	-0.182407
	Foxp1	0.188861	-0.0565099
	Fpgs	-0.0779414	-0.0566719
	Fra10ac1	-0.106511	-0.193045
	Frg1	0.244149	0.00608098
	Frmd8	0.046089	-0.317302
	Fryl	-0.135926	-0.615583
	Fsd1l	0.739079	1.73304
	Fth1	-0.182938	-0.73115
	Ftl1	-0.252325	-0.568939
	Fto	-0.0236369	-0.225983
	Ftsj1	0.110863	-0.286076
	Ftsj3	-0.0405588	-0.235869
	Fubp1	-0.0124018	-0.111197
	Fubp3	-0.0227293	-0.173946
	Fuca1	0.0591919	0.0354634
	Fuca2	-0.155195	0.158443
	Fundc2	0.176793	0.00938443
	Furin	-0.442812	-1.72824
	Fus	-0.0037374	-0.130654
	Fut8	0.163799	0.104862
	Fxn	0.293715	-0.408264
	Fxr1	-0.044284	-0.304312
	Fxr2	-0.0452269	-0.196562
	Fxyd5	-0.0187917	0.176085
	Fyb	-0.196707	-0.365648
	Fyco1	-0.146251	-0.69098
	Fyn	-0.06261	-0.224567
	Fyttd1	-0.0900393	0.00921698
	G3bp1	0.0594027	-0.247324
	G3bp2	0.0419026	-0.297518
	G6pc3	-0.0970417	-0.190315
	G6pdx	-0.0423657	-0.287859
	Gaa	-0.145535	-0.938348
	Gabarap	-0.0256212	-0.27122
	Gabarapl2	-0.0639597	-0.240358
	Gabpa	0.0216058	-0.230757
	Gabpb1	0.0541523	0.129801
	Gabpb2	0.0292124	-0.052279
	Gadd45gip1	0.0710781	0.122123
	Gak	-0.0458449	-0.222303
	Gale	-0.130515	-0.329458
	Galk1	0.0333344	-0.19175
	Galk2	0.0528535	-0.275674
	Galns	0.0620176	-0.256705
	Galnt1	-0.0479862	-0.379653
	Galnt12	-0.0386039	-0.187002
	Galnt3	-0.196617	-0.797867
	Galnt6	-0.0362997	-0.571303
	Galnt7	0.0356552	-0.227203
	Galt	-0.0907477	-0.328823
	Gan	-0.101742	-0.363509
	Ganab	-0.0512893	-0.333702
	Gapdh	-0.0334928	-0.384397
	Gapvd1	-0.0175376	-0.185035
	Gar1	0.0436034	-0.134276
	Gars	-0.0715621	-0.342917
	Gart	0.00527146	-0.232526
	Gata3	0.140028	-0.097467
	Gatad1	0.00142224	-0.0234898
	Gatad2a	-0.0230496	-0.0822979
	Gatad2b	0.109725	0.0597193
	Gatd1	0.174484	-0.197121
	Gatd3a	0.204558	-0.0430015
	Gatm	-0.102216	-0.376786
	Gba	-0.0944911	-0.286249
	Gba2	-0.0561458	-0.279544
	Gbe1	0.0507768	0.105433
	Gbf1	-0.197859	-0.358391
	Gbp2	0.394116	-0.0534301
	Gbp3	0.0910148	-0.188309
	Gbp5	0.424685	-0.0884203
	Gbp6	0.179128	-0.252434
	Gbp7	-0.0021451	-0.243454
	Gcat	0.12491	-0.226546
	Gcc1	-0.0555886	0.111939
	Gcc2	0.0466627	0.232094
	Gcdh	-0.090826	-0.207106
	Gcfc2	-0.0491027	-0.202835
	Gclc	0.118335	-0.0827521
	Gclm	0.148661	-0.0810359
	Gcn1	-0.15596	-0.370296
	Gcsh	-0.165449	-0.585526
	Gde1	0.0502616	-0.275631
	Gdi1	-0.313207	-0.126795
	Gdi2	0.0866965	-0.266662
	Gdpgp1	-0.153822	-0.89141
	Gem	-0.260559	-0.919073
	Gemin2	0.102145	0.472694
	Gemin5	-0.0230815	-0.36021
	Gemin6	-0.0318197	-0.84383
	Gemin7	0.0661962	0.261802
	Gen1	0.073644	-0.389004
	Get1	-0.0235545	1.78327
	Get3	0.0697816	-0.286006
	Get4	0.0196655	-0.274265
	Gfer	-0.17008	-0.253786
	Gfm1	-0.0183471	0.317025
	Gfm2	-0.121302	-0.363858
	Gfpt1	-0.305317	-0.543854
	Gga1	-0.0677706	-0.418276
	Gga3	-0.110679	-0.492061
	Ggact	0.15401	-0.41843
	Ggct	0.0426513	-0.156065
	Ggh	0.136135	-0.162111
	Ggnbp2	0.105272	-0.064697
	Ggps1	0.0379152	-0.340065
	Ggt1	0.157733	7.51e-05
	Ggta1	-0.0179009	-0.239802
	Ghitm	0.100673	0.0318018
	Gid8	-0.0154635	-0.563693
	Gigyf1	-0.0541792	-0.281586
	Gigyf2	-0.141503	-0.166126
	Gimap1	0.0408179	-0.304214
	Gimap3	0.136644	-0.0065363
	Gimap4	0.282397	0.126411
	Gimap5	0.0590256	-0.0298581
	Gimap6	0.188784	-0.0987293
	Gimap7	0.196019	-0.0534463
	Gimap8	-0.0264549	-0.230059
	Gimap9	0.2156	0.0164375
	Gins1	0.115631	-0.0378259
	Gins2	0.0589574	-0.318852
	Gins3	0.120457	0.898877
	Gins4	0.100581	-0.125896
	Gipc1	-0.0634256	-0.323892
	Gipc2	-0.785682	-0.731516
	Git1	-0.100265	-0.184851
	Git2	0.0172117	-0.211759
	Gk	-0.108767	-0.198344
	Gla	0.0808714	-0.228796
	Glb1	0.0592299	-0.331311
	Gle1	0.100527	-0.436538
	Glg1	-0.0236716	-0.362174
	Glipr1	-0.0427166	-0.383469
	Glipr2	0.107214	-0.154797
	Glmn	-0.123132	-0.270717
	Glmp	-0.0629615	-0.501241
	Glo1	0.821122	0.690097
	Glod4	0.113984	-0.199172
	Glrx	-0.100439	-0.529187
	Glrx2	-0.10325	-0.323618
	Glrx3	0.0861002	-0.202829
	Glrx5	-0.0029711	-0.317883
	Gltp	0.0846174	-0.23152
	Glud1	0.101766	-0.0609593
	Glul	0.32339	-0.0880984
	Glyr1	0.0349465	-0.199197
	Gm2a	0.375641	0.21312
	Gmds	-0.100144	-0.419883
	Gmeb1	0.0312963	-0.0049462
	Gmeb2	0.011664	0.119946
	Gmfb	0.0714675	-0.186985
	Gmfg	0.0895588	-0.231335
	Gmip	-0.18254	-0.256596
	Gmnn	0.148254	0.00188543
	Gmppa	-0.0741964	-0.831032
	Gmppb	-0.170294	-0.370372
	Gmpr2	0.0047198	-0.125583
	Gmps	0.0610605	-0.20861
	Gna11	-0.120839	-0.129781
	Gna13	0.104504	-0.180564
	Gnai2	-0.0041346	-0.186543
	Gnai3	0.0288161	-0.354438
	Gnaq	-0.10924	-0.282258
	Gnas	0.100228	-0.24976
	Gnb1	0.00491429	-0.242424
	Gnb2	0.0145512	-0.351745
	Gne	-0.23595	-0.160135
	Gng12	-0.108741	-0.480132
	Gng2	0.00580895	-0.361747
	Gng5	-0.0174775	-0.143907
	Gnl1	-0.0356609	-0.361289
	Gnl2	-0.0324829	-0.335144
	Gnl3	-0.0025642	-0.277454
	Gnl3l	0.00983365	0.0664123
	Gnpat	-0.0260015	-0.313856
	Gnpda1	-0.0877383	-0.184641
	Gnpda2	0.0120101	-0.277711
	Gnpnat1	-0.138548	-0.347718
	Gnptab	-0.0807722	-1.71621
	Gns	-0.361274	-0.459496
	Golga2	-0.215327	-0.489684
	Golga3	-0.128653	-0.342963
	Golga4	-0.180702	-0.160195
	Golga5	-0.0329126	-0.277806
	Golga7	-0.0410374	-0.306776
	Golgb1	-0.264073	-0.619353
	Golim4	-0.107509	-0.507615
	Golm1	-0.0075562	-0.329627
	Golph3	-0.0352202	-0.324767
	Golph3l	0.194272	0.0760761
	Golt1b	0.00847889	1.00075
	Gon4l	-0.115913	-0.864632
	Gopc	0.015968	-0.423262
	Gorasp2	-0.117038	-0.322158
	Gosr1	0.00667024	-0.183677
	Gosr2	0.0363885	-0.495653
	Got1	-0.041774	-0.146951
	Got2	0.0126403	-0.15683
	Gpaa1	-0.0811177	-0.320596
	Gpalpp1	0.0785022	-0.039478
[truncated: 4,106 more rows]

## Sheet: 5H
		WT			Pim dKO
	Protein content (µg / million cells)	6.04731	5.8654	5.81517	4.277	5.05863	5.0151
	% of protein content	7.96328	7.86247	7.88711	7.55521	7.71015	7.80925

## Sheet: 5I
	Estimated protein copies per cell
		WT			Pim dKO
	Pdcd4	32756	25873	26505	58390	43942	34104

## Sheet: 5K
	Estimated protein copies per cell
		WT			Pim dKO
	Eif4a1	4490028	4350958	4155801	2948577	3649361	3531669

[truncated: 1 more sheets: 5L]
