# Supplementary material for: PIM kinase control of CD8 T cell protein synthesis and cell trafficking
Source: eLife. 2025 May 13;13:RP98622. doi: 10.7554/eLife.98622 (PMC12074636; doi:10.7554/eLife.98622)
Supplement: Figure 6—source data 3. [file elife-98622-fig6-data3.xlsx]

## Sheet: 6A
	Ratio signal pS6K T389 : pan S6K
	WT	dKO
	0.33037	0.360185
	0.836288	0.454441
	1.17391	0.577576
	1.09901	0.690821
	0.845266	0.670118
	0.461864	0.260456

## Sheet: 6C
	mRNA expression (TPM)
	Gene Name	WT			Pim dKO
	S1pr1	10	5.4	10.3	43.6	15.2	18.7
	Ccr7	25.9	21.2	30.2	69.9	33.6	38.2
	Sell	6.5	4.5	8.5	58.1	12.3	17.2

## Sheet: 6D
	mRNA expression (TPM)
	Gene Name	WT			Pim dKO
	Klf2	9.2	8	8.6	36.4	12.7	13.6

## Sheet: 6E
	4 hours
	Blood		Lymph nodes		Spleen
	Pim dKO	WT	Pim dKO	WT	Pim dKO	WT
	66.8	33.2215	93.2	6.82927	78.4	21.5708
	76.9*	23.07692*	92.9*	7.142857*	85.5	14.4927
	56	44	64.2	35.7616	71	29.0019
	49.2	50.786	69.8	30.2326	68.6	31.3834
	58.1	41.8837	87.1	12.9032	76.2	23.7854
	100*	0*	100*	0*	100*	0*
	* insufficient cells detected for quantification so data not shown (<20 of the transferred cells were recovered in these samples, a pre-determined minimum threshold of 100 cells was required for quantification to be included)
	23 hours
	Blood		Lymph nodes		Spleen
	Pim dKO	WT	Pim dKO	WT	Pim dKO	WT
	66.2	33.7504	94.6	5.4143	72.6	27.4416
	59.8	40.2253	94.4	5.64272	74.2	25.767
	48.4	51.6241	90.3	9.69856	60.2	39.7552
	49	51.0451	92.6	7.41024	60.9	39.0802
	65.3	34.7128	91.2	8.82807	74.4	25.5622
	65	35.0354	92.9	7.14681	71.1	28.9214
