# Supplementary material for: PIM kinase control of CD8 T cell protein synthesis and cell trafficking
Source: eLife. 2025 May 13;13:RP98622. doi: 10.7554/eLife.98622 (PMC12074636; doi:10.7554/eLife.98622)
Supplement: Supplementary file 1. [file elife-98622-supp1.xlsx]

## Sheet: estimated copies per cell
					ESTIMATED COPY NUMBER PER CELL
					CD4 naïve WT			CD4 TCR WT			CD4 TCR Pim dKO			CD8 naïve WT			CD8 TCR WT			CD8 TCR Pim dKO
	Fasta headers	Protein_IDs (uniprot)	Protein names	Gene names	BR1	BR2	BR3	BR1	BR2	BR3	BR1	BR2	excluded due to poor sample quality	BR1	BR2	BR3	BR1	BR2	BR3	BR1	BR2	BR3		Absolute quantification accuracy (Perseus)	Razor + unique peptides	Unique peptides	Sequence coverage [%]
	sp|P58742|AAAS_MOUSE Aladin OS=Mus musculus OX=10090 GN=Aaas PE=1 SV=1	P58742	Aladin	Aaas	1800	2397	6457	23359	16354	15163	7767	14558		5056	10353	3620	35636	23588	29957	13839	28316	19725		high	19	19	49.8
	sp|Q9D2R0|AACS_MOUSE Acetoacetyl-CoA synthetase OS=Mus musculus OX=10090 GN=Aacs PE=1 SV=1	Q9D2R0	Acetoacetyl-CoA synthetase	Aacs	1140	2033	1282	75583	62686	38595	44252	50141		1314	1598	2276	72049	64011	67187	51514	59818	55873		high	27	27	47
	sp|Q8R2R3|AAGAB_MOUSE Alpha- and gamma-adaptin-binding protein p34 OS=Mus musculus OX=10090 GN=Aagab PE=1 SV=2	Q8R2R3	Alpha- and gamma-adaptin-binding protein p34	Aagab	881	605	651	17941	14390	9228	5753	11940		2123	1536	2470	29108	29652	30278	22749	22729	12805		medium	7	7	33.5
	sp|Q3UHJ0|AAK1_MOUSE AP2-associated protein kinase 1 OS=Mus musculus OX=10090 GN=Aak1 PE=1 SV=2;sp|Q3UHJ0-2|AAK1_MOUSE Isoform 2 of AP2-associated protein kinase 1 OS=Mus musculus OX=10090 GN=Aak1	Q3UHJ0;Q3UHJ0-2	AP2-associated protein kinase 1	Aak1	4543	10159	11188	49468	34329	26420	33000	40157		8739	9564	8952	22307	35875	27266	23131	36545	17944		high	36	34	55.1
	sp|Q8R0P4|AAMDC_MOUSE Mth938 domain-containing protein OS=Mus musculus OX=10090 GN=Aamdc PE=1 SV=1	Q8R0P4;Q8R0P4-2	Mth938 domain-containing protein	Aamdc	0	433	618	0	0	0	200	0		1927	2056	2792	3154	667	755	0	0	0		medium	5	5	44.3
	tr|J3QN89|J3QN89_MOUSE Angio-associated migratory protein OS=Mus musculus OX=10090 GN=Aamp PE=1 SV=1;tr|Q3TJ22|Q3TJ22_MOUSE Angio-associated migratory protein OS=Mus musculus OX=10090 GN=Aamp PE=1 SV=1	J3QN89;Q3TJ22;A0A087WNM5		Aamp	2325	2126	2346	110129	102218	75716	60512	63914		3158	4596	3621	97960	112341	93054	92578	94592	73948		high	15	15	45
	sp|Q9D2V5|AAR2_MOUSE Protein AAR2 homolog OS=Mus musculus OX=10090 GN=Aar2 PE=1 SV=3	Q9D2V5	Protein AAR2 homolog	Aar2	0	122	76	22040	20955	13671	8090	10981		0	238	225	11004	17432	10971	13311	11652	12132		high	14	14	44.5
	sp|Q8BGQ7|SYAC_MOUSE Alanine--tRNA ligase, cytoplasmic OS=Mus musculus OX=10090 GN=Aars1 PE=1 SV=1	Q8BGQ7	Alanine--tRNA ligase, cytoplasmic	Aars	6605	6702	7517	340103	269432	171001	177939	221673		7057	7104	6490	278693	332473	280484	254088	287360	183742		high	48	48	62.7
	sp|Q14CH7|SYAM_MOUSE Alanine--tRNA ligase, mitochondrial OS=Mus musculus OX=10090 GN=Aars2 PE=1 SV=1	Q14CH7	Alanine--tRNA ligase, mitochondrial	Aars2	0	83	48	5474	3203	4230	4524	4010		58	81	128	5026	6317	8220	7013	6075	4002		high	22	22	32.6
	sp|Q3THG9|AASD1_MOUSE Alanyl-tRNA editing protein Aarsd1 OS=Mus musculus OX=10090 GN=Aarsd1 PE=1 SV=2	Q3THG9	Alanyl-tRNA editing protein Aarsd1	Aarsd1	8564	9127	8615	124801	119392	102154	57921	73118		9871	10339	11079	157774	151489	172900	93913	163444	107555		high	25	25	70.1
	sp|Q9CQF6|ADPPT_MOUSE L-aminoadipate-semialdehyde dehydrogenase-phosphopantetheinyl transferase OS=Mus musculus OX=10090 GN=Aasdhppt PE=1 SV=1;sp|Q9CQF6-2|ADPPT_MOUSE Isoform 2 of L-aminoadipate-semialdehyde dehydrogenase-phosphopantetheinyl transferase OS	Q9CQF6;Q9CQF6-2	L-aminoadipate-semialdehyde dehydrogenase-phosphopantetheinyl transferase	Aasdhppt	307	470	643	12074	18204	16876	11529	4340		773	682	761	17068	14788	14736	11722	13160	9974		high	9	9	34.6
	sp|Q9JKX4|AATF_MOUSE Protein AATF OS=Mus musculus OX=10090 GN=Aatf PE=1 SV=1;sp|Q9JKX4-2|AATF_MOUSE Isoform 2 of Protein AATF OS=Mus musculus OX=10090 GN=Aatf;sp|Q9JKX4-3|AATF_MOUSE Isoform 3 of Protein AATF OS=Mus musculus OX=10090 GN=Aatf	Q9JKX4;Q9JKX4-2;Q9JKX4-3	Protein AATF	Aatf	4485	6376	5280	72564	78914	61518	41614	85855		11507	15019	15340	135199	134518	144819	61800	142587	96064		high	28	27	54
	sp|P41234|ABCA2_MOUSE ATP-binding cassette sub-family A member 2 OS=Mus musculus OX=10090 GN=Abca2 PE=1 SV=4	P41234	ATP-binding cassette sub-family A member 2	Abca2	0	0	0	0	0	0	0	0		36	33	35	0	0	0	0	0	4247		low	2	2	1.7
	sp|Q8R420|ABCA3_MOUSE ATP-binding cassette sub-family A member 3 OS=Mus musculus OX=10090 GN=Abca3 PE=1 SV=3	Q8R420	ATP-binding cassette sub-family A member 3	Abca3	26	0	0	992	1745	1190	0	2397		0	0	22	3063	270	5837	0	0	0		low	2	1	1.2
	sp|Q91V24|ABCA7_MOUSE ATP-binding cassette sub-family A member 7 OS=Mus musculus OX=10090 GN=Abca7 PE=1 SV=1	Q91V24	ATP-binding cassette sub-family A member 7	Abca7	61	33	78	61	57	48	0	67		67	41	186	114	162	90	38	105	51		medium	7	7	5.7
	sp|P21447|MDR1A_MOUSE ATP-dependent translocase ABCB1 OS=Mus musculus OX=10090 GN=Abcb1a PE=1 SV=3	P21447	Multidrug resistance protein 1A	Abcb1a	0	0	0	0	0	0	0	0		176	400	579	0	227	230	0	0	0		medium	7	6	21.8
	sp|P06795|MDR1B_MOUSE ATP-dependent translocase ABCB1 OS=Mus musculus OX=10090 GN=Abcb1b PE=1 SV=1	P06795	Multidrug resistance protein 1B	Abcb1b	72	65	182	7517	4854	5305	5367	4374		1180	799	703	20455	20152	20360	18610	20544	16512		medium	39	24	36.2
	sp|Q9DC29|ABCB6_MOUSE ATP-binding cassette sub-family B member 6, mitochondrial OS=Mus musculus OX=10090 GN=Abcb6 PE=1 SV=1	Q9DC29	ATP-binding cassette sub-family B member 6, mitochondrial	Abcb6	0	0	0	384	510	297	0	244		0	30	40	2319	1247	860	1265	419	588		medium	5	5	13.4
	sp|Q61102|ABCB7_MOUSE ATP-binding cassette sub-family B member 7, mitochondrial OS=Mus musculus OX=10090 GN=Abcb7 PE=1 SV=3	Q61102	ATP-binding cassette sub-family B member 7, mitochondrial	Abcb7	7635	5213	4736	38432	30356	19644	34561	28983		5458	6658	7464	47101	46716	60753	38577	43923	32279		high	23	23	42.2
	sp|Q9CXJ4|MITOS_MOUSE Mitochondrial potassium channel ATP-binding subunit OS=Mus musculus OX=10090 GN=Abcb8 PE=1 SV=1	Q9CXJ4	ATP-binding cassette sub-family B member 8, mitochondrial	Abcb8	332	690	480	2294	2515	711	845	626		1134	734	926	3230	3174	3469	3854	1845	566		high	17	17	28.3
	sp|O35379|MRP1_MOUSE Multidrug resistance-associated protein 1 OS=Mus musculus OX=10090 GN=Abcc1 PE=1 SV=1	O35379	Multidrug resistance-associated protein 1	Abcc1	51	34	54	4263	4844	2052	3309	23990		37	77	118	4808	3886	4433	3333	3360	2168		high	31	29	27.7
	tr|E9Q467|E9Q467_MOUSE ATP-binding cassette, sub-family C (CFTR/MRP), member 4 OS=Mus musculus OX=10090 GN=Abcc4 PE=1 SV=1;tr|E9Q236|E9Q236_MOUSE ATP-binding cassette, sub-family C (CFTR/MRP), member 4 OS=Mus musculus OX=10090 GN=Abcc4 PE=1 SV=1	E9Q467;E9Q236		Abcc4	147	139	119	1795	1101	1124	872	849		334	207	371	1923	1992	2082	1448	1668	1153		high	28	28	26.3
	sp|P48410|ABCD1_MOUSE ATP-binding cassette sub-family D member 1 OS=Mus musculus OX=10090 GN=Abcd1 PE=1 SV=1	P48410	ATP-binding cassette sub-family D member 1	Abcd1	1847	1370	1462	2438	3830	2551	1949	2770		1694	1718	1611	1204	2338	1177	2504	2103	0		high	12	12	20
	sp|P55096|ABCD3_MOUSE ATP-binding cassette sub-family D member 3 OS=Mus musculus OX=10090 GN=Abcd3 PE=1 SV=2	P55096	ATP-binding cassette sub-family D member 3	Abcd3	2020	2336	1719	14389	18492	17552	13225	16631		1692	2065	2434	30576	31410	91184	25545	34661	30048		high	24	24	39.9
	sp|O89016|ABCD4_MOUSE Lysosomal cobalamin transporter ABCD4 OS=Mus musculus OX=10090 GN=Abcd4 PE=1 SV=2	O89016	ATP-binding cassette sub-family D member 4	Abcd4	47	25	26	0	1083	0	0	960		96	0	0	0	0	0	0	0	0		medium	5	5	10.6
	sp|P61222|ABCE1_MOUSE ATP-binding cassette sub-family E member 1 OS=Mus musculus OX=10090 GN=Abce1 PE=1 SV=1	P61222	ATP-binding cassette sub-family E member 1	Abce1	23114	27262	19832	571330	544680	504773	362137	508188		30537	34448	40085	633271	634413	644222	658340	670863	512108		high	39	39	59.6
	sp|Q6P542|ABCF1_MOUSE ATP-binding cassette sub-family F member 1 OS=Mus musculus OX=10090 GN=Abcf1 PE=1 SV=1	Q6P542	ATP-binding cassette sub-family F member 1	Abcf1	13738	18852	18613	210651	155909	148319	143886	162045		18355	28155	26021	273753	228758	266718	217529	246653	217136		high	45	45	65.2
	sp|Q99LE6|ABCF2_MOUSE ATP-binding cassette sub-family F member 2 OS=Mus musculus OX=10090 GN=Abcf2 PE=1 SV=1	Q99LE6	ATP-binding cassette sub-family F member 2	Abcf2	10371	11725	9701	379216	281033	297220	232504	251328		10037	16934	16821	500092	487109	512802	379124	407951	434975		high	41	40	65.9
	sp|Q8K268|ABCF3_MOUSE ATP-binding cassette sub-family F member 3 OS=Mus musculus OX=10090 GN=Abcf3 PE=1 SV=1	Q8K268	ATP-binding cassette sub-family F member 3	Abcf3	1988	2406	1912	39124	28975	24761	16537	32177		2398	3233	3132	43506	42669	49127	34175	44775	33143		high	31	31	52.3
	sp|Q64343|ABCG1_MOUSE ATP-binding cassette sub-family G member 1 OS=Mus musculus OX=10090 GN=Abcg1 PE=1 SV=1	Q64343;Q91WA9	ATP-binding cassette sub-family G member 1	Abcg1	346	316	137	0	106	91	140	0		174	142	518	313	0	0	0	129	0		high	8	8	18.8
	sp|Q7TMS5|ABCG2_MOUSE Broad substrate specificity ATP-binding cassette transporter ABCG2 OS=Mus musculus OX=10090 GN=Abcg2 PE=1 SV=1	Q7TMS5	ATP-binding cassette sub-family G member 2	Abcg2	87	0	137	950	0	294	531	670		0	0	0	1430	1994	1147	1200	1584	0		medium	6	6	12.5
	sp|Q99P81|ABCG3_MOUSE ATP-binding cassette sub-family G member 3 OS=Mus musculus OX=10090 GN=Abcg3 PE=1 SV=2	Q99P81	ATP-binding cassette sub-family G member 3	Abcg3	567	422	487	0	0	518	480	0		786	1143	872	1034	0	0	2635	733	0		high	11	11	26.6
	sp|Q6PE15-2|ABHDA_MOUSE Isoform 2 of Mycophenolic acid acyl-glucuronide esterase, mitochondrial OS=Mus musculus OX=10090 GN=Abhd10;sp|Q6PE15|ABHDA_MOUSE Mycophenolic acid acyl-glucuronide esterase, mitochondrial OS=Mus musculus OX=10090 GN=Abhd10 PE=1 SV=1	Q6PE15-2;Q6PE15	Mycophenolic acid acyl-glucuronide esterase, mitochondrial	Abhd10	3045	2538	2082	14386	21720	14601	5367	8432		1663	2946	2561	5175	18796	16353	9663	12398	12766		high	10	10	47.3
	sp|Q8K4F5|ABHDB_MOUSE Protein ABHD11 OS=Mus musculus OX=10090 GN=Abhd11 PE=1 SV=1	Q8K4F5	Alpha/beta hydrolase domain-containing protein 11	Abhd11	2131	2347	3398	25701	30249	13349	16365	25349		6978	5523	5947	50524	49329	73505	39232	40385	11352		high	10	10	44.6
	sp|Q99LR1|ABD12_MOUSE Lysophosphatidylserine lipase ABHD12 OS=Mus musculus OX=10090 GN=Abhd12 PE=1 SV=2;sp|Q99LR1-2|ABD12_MOUSE Isoform 2 of Lysophosphatidylserine lipase ABHD12 OS=Mus musculus OX=10090 GN=Abhd12	Q99LR1;Q99LR1-2	Monoacylglycerol lipase ABHD12	Abhd12	4607	2692	3954	9821	10215	11881	6611	12111		3765	4087	4684	12108	11231	15047	8294	12295	5451		high	16	16	45
	sp|Q8VCR7|ABHEB_MOUSE Protein ABHD14B OS=Mus musculus OX=10090 GN=Abhd14b PE=1 SV=1	Q8VCR7	Alpha/beta hydrolase domain-containing protein 14B	Abhd14b	0	0	490	2877	3798	0	0	2668		251	773	195	944	926	1386	2415	2977	0		medium	5	5	35.2
	sp|Q5F2F2|ABH15_MOUSE Protein ABHD15 OS=Mus musculus OX=10090 GN=Abhd15 PE=1 SV=1	Q5F2F2	Abhydrolase domain-containing protein 15	Abhd15	107	246	438	0	0	0	0	0		1560	2476	2194	0	0	1239	0	0	1814		high	12	12	31.6
	sp|Q9Z1Q2|ABHGA_MOUSE Phosphatidylserine lipase ABHD16A OS=Mus musculus OX=10090 GN=Abhd16a PE=1 SV=3	Q9Z1Q2	Abhydrolase domain-containing protein 16A	Abhd16a	283	1805	1110	1169	1079	0	759	0		1984	1917	2660	1855	1946	2016	963	720	443		high	17	16	37.5
	sp|Q99JW1-2|AB17A_MOUSE Isoform 2 of Alpha/beta hydrolase domain-containing protein 17A OS=Mus musculus OX=10090 GN=Abhd17a;sp|Q99JW1|AB17A_MOUSE Alpha/beta hydrolase domain-containing protein 17A OS=Mus musculus OX=10090 GN=Abhd17a PE=1 SV=1	Q99JW1-2;Q99JW1	Alpha/beta hydrolase domain-containing protein 17A	Abhd17a	326	385	508	0	0	0	0	848		577	862	429	0	0	0	0	0	387		medium	5	5	42.3
	sp|Q7M759|AB17B_MOUSE Alpha/beta hydrolase domain-containing protein 17B OS=Mus musculus OX=10090 GN=Abhd17b PE=1 SV=1	Q7M759	Alpha/beta hydrolase domain-containing protein 17B	Abhd17b	529	0	0	3894	3436	3953	1434	6871		0	482	990	9561	9295	34867	4076	2932	6604		medium	6	6	39.6
	sp|Q8VCV1|AB17C_MOUSE Alpha/beta hydrolase domain-containing protein 17C OS=Mus musculus OX=10090 GN=Abhd17c PE=1 SV=2	Q8VCV1	Alpha/beta hydrolase domain-containing protein 17C	Abhd17c	118	0	0	677	2534	3217	0	813		0	0	0	2051	1681	1904	0	0	0		low	2	2	14.4
	sp|Q9QXM0|ABHD2_MOUSE Monoacylglycerol lipase ABHD2 OS=Mus musculus OX=10090 GN=Abhd2 PE=1 SV=1	Q9QXM0	Abhydrolase domain-containing protein 2	Abhd2	0	0	0	0	618	291	500	389		0	0	0	293	240	377	368	198	333		low	1	1	2.6
	sp|Q8R2Y0-2|ABHD6_MOUSE Isoform 2 of Monoacylglycerol lipase ABHD6 OS=Mus musculus OX=10090 GN=Abhd6;sp|Q8R2Y0|ABHD6_MOUSE Monoacylglycerol lipase ABHD6 OS=Mus musculus OX=10090 GN=Abhd6 PE=1 SV=1	Q8R2Y0-2;Q8R2Y0	Monoacylglycerol lipase ABHD6	Abhd6	1677	1154	3294	13351	10654	17583	12659	10120		3439	2591	2866	12138	11812	11332	12233	18193	13093		high	10	10	47.4
	sp|Q8CBW3-5|ABI1_MOUSE Isoform 5 of Abl interactor 1 OS=Mus musculus OX=10090 GN=Abi1;sp|Q8CBW3-2|ABI1_MOUSE Isoform 2 of Abl interactor 1 OS=Mus musculus OX=10090 GN=Abi1;sp|Q8CBW3-4|ABI1_MOUSE Isoform 4 of Abl interactor 1 OS=Mus musculus OX=10090 GN=Abi	Q8CBW3-5;Q8CBW3-2;Q8CBW3-4;Q8CBW3-3;Q8CBW3	Abl interactor 1	Abi1	8890	10227	8503	125223	44022	54662	44634	63797		9151	18512	14130	60731	45768	53694	55965	56554	29400		medium	18	13	41.2
	sp|Q8BYZ1|ABI3_MOUSE ABI gene family member 3 OS=Mus musculus OX=10090 GN=Abi3 PE=1 SV=3;sp|Q8BYZ1-2|ABI3_MOUSE Isoform 2 of ABI gene family member 3 OS=Mus musculus OX=10090 GN=Abi3	Q8BYZ1;Q8BYZ1-2	ABI gene family member 3	Abi3	2540	4069	4079	12047	10073	5959	2668	16537		8222	6697	3706	5364	11317	3515	2102	3272	6540		high	13	13	43.1
	sp|P00520-4|ABL1_MOUSE Isoform IV of Tyrosine-protein kinase ABL1 OS=Mus musculus OX=10090 GN=Abl1;sp|P00520-2|ABL1_MOUSE Isoform II of Tyrosine-protein kinase ABL1 OS=Mus musculus OX=10090 GN=Abl1;sp|P00520-3|ABL1_MOUSE Isoform III of Tyrosine-protein kin	P00520-4;P00520-2;P00520-3;P00520	Tyrosine-protein kinase ABL1	Abl1	0	0	79	292	233	287	269	0		74	49	138	51	0	0	59	0	38		medium	10	7	12.3
	sp|Q4JIM5|ABL2_MOUSE Tyrosine-protein kinase ABL2 OS=Mus musculus OX=10090 GN=Abl2 PE=1 SV=1	Q4JIM5	Abelson tyrosine-protein kinase 2	Abl2	0	0	17	534	514	464	433	299		0	36	0	0	441	101	241	299	0		medium	5	5	12.9
	sp|Q8K4G5|ABLM1_MOUSE Actin-binding LIM protein 1 OS=Mus musculus OX=10090 GN=Ablim1 PE=1 SV=1;sp|Q8K4G5-3|ABLM1_MOUSE Isoform 3 of Actin-binding LIM protein 1 OS=Mus musculus OX=10090 GN=Ablim1;sp|Q8K4G5-2|ABLM1_MOUSE Isoform 2 of Actin-binding LIM protei	Q8K4G5;Q8K4G5-3;Q8K4G5-2;Q8K4G5-4	Actin-binding LIM protein 1	Ablim1	4810	4215	9022	37385	29596	27282	24664	31350		7626	11701	11525	21885	25911	33023	23230	22454	9123		high	25	25	33.6
	sp|Q69ZX8|ABLM3_MOUSE Actin-binding LIM protein 3 OS=Mus musculus OX=10090 GN=Ablim3 PE=1 SV=2	Q69ZX8	Actin-binding LIM protein 3	Ablim3	0	0	0	5914	0	3901	432	5115		0	844	0	1499	2243	3879	919	4549	0		low	2	1	2.3
	sp|Q5SSL4-4|ABR_MOUSE Isoform 4 of Active breakpoint cluster region-related protein OS=Mus musculus OX=10090 GN=Abr;sp|Q5SSL4|ABR_MOUSE Active breakpoint cluster region-related protein OS=Mus musculus OX=10090 GN=Abr PE=1 SV=1;sp|Q5SSL4-2|ABR_MOUSE Isoform	Q5SSL4-4;Q5SSL4;Q5SSL4-2;Q5SSL4-3	Active breakpoint cluster region-related protein	Abr	2552	4254	4091	4452	3393	4130	4200	788		6020	6530	5598	5979	1315	1312	2311	1269	556		high	25	24	39.8
	sp|Q4KML4|ABRAL_MOUSE Costars family protein ABRACL OS=Mus musculus OX=10090 GN=Abracl PE=1 SV=1	Q4KML4	Costars family protein ABRACL	Abracl	72732	78275	101795	1012767	672109	553528	580695	733671		193128	128170	151215	1066331	970271	1061405	776358	2183741	890544		medium	3	3	46.9
	sp|Q9QYL7|ABT1_MOUSE Activator of basal transcription 1 OS=Mus musculus OX=10090 GN=Abt1 PE=2 SV=1	Q9QYL7	Activator of basal transcription 1	Abt1	1098	1038	595	65706	70689	42486	34085	33214		2546	3920	5616	120812	115445	91775	65010	75286	45037		high	17	17	72.5
	sp|Q7TQI7|ABTB2_MOUSE Ankyrin repeat and BTB/POZ domain-containing protein 2 OS=Mus musculus OX=10090 GN=Abtb2 PE=1 SV=1	Q7TQI7	Ankyrin repeat and BTB/POZ domain-containing protein 2	Abtb2	0	304	0	86	0	0	120	0		234	0	691	392	0	318	218	111	962		medium	6	6	7.6
	sp|Q921H8|THIKA_MOUSE 3-ketoacyl-CoA thiolase A, peroxisomal OS=Mus musculus OX=10090 GN=Acaa1a PE=1 SV=1;sp|Q8VCH0|THIKB_MOUSE 3-ketoacyl-CoA thiolase B, peroxisomal OS=Mus musculus OX=10090 GN=Acaa1b PE=1 SV=1	Q921H8;Q8VCH0	3-ketoacyl-CoA thiolase A, peroxisomal;3-ketoacyl-CoA thiolase B, peroxisomal	Acaa1a;Acaa1b	8310	10809	19430	144392	125215	82799	115012	118681		12885	21357	22047	111055	113159	109983	96546	137621	80290		high	17	17	64.4
	sp|Q8BWT1|THIM_MOUSE 3-ketoacyl-CoA thiolase, mitochondrial OS=Mus musculus OX=10090 GN=Acaa2 PE=1 SV=3	Q8BWT1	3-ketoacyl-CoA thiolase, mitochondrial	Acaa2	124444	160171	184602	495876	543679	675796	558479	469462		159114	239778	217559	501212	466322	498672	425491	386668	373656		high	27	27	83.1
	sp|Q5SWU9|ACACA_MOUSE Acetyl-CoA carboxylase 1 OS=Mus musculus OX=10090 GN=Acaca PE=1 SV=1;sp|Q5SWU9-2|ACACA_MOUSE Isoform 2 of Acetyl-CoA carboxylase 1 OS=Mus musculus OX=10090 GN=Acaca	Q5SWU9;Q5SWU9-2	Acetyl-CoA carboxylase 1;Biotin carboxylase	Acaca	444	414	456	55216	34025	28673	26149	28973		685	719	936	64109	74650	92171	52049	71946	53892		high	109	98	55
	sp|E9Q4Z2|ACACB_MOUSE Acetyl-CoA carboxylase 2 OS=Mus musculus OX=10090 GN=Acacb PE=1 SV=1	E9Q4Z2	Acetyl-CoA carboxylase 2;Biotin carboxylase	Acacb	0	0	0	0	328	264	194	0		0	0	0	292	312	512	323	458	122		low	2	2	6.3
	sp|Q8K370|ACD10_MOUSE Acyl-CoA dehydrogenase family member 10 OS=Mus musculus OX=10090 GN=Acad10 PE=1 SV=1	Q8K370	Acyl-CoA dehydrogenase family member 10	Acad10	263	317	766	1390	1323	1374	1674	1364		990	557	725	539	967	636	962	416	676		high	18	18	21.4
	sp|Q80XL6|ACD11_MOUSE Acyl-CoA dehydrogenase family member 11 OS=Mus musculus OX=10090 GN=Acad11 PE=1 SV=2	Q80XL6	Acyl-CoA dehydrogenase family member 11	Acad11	0	248	269	678	890	481	590	595		0	0	88	1033	843	979	770	314	0		high	12	12	20.9
	sp|Q9D7B6|ACAD8_MOUSE Isobutyryl-CoA dehydrogenase, mitochondrial OS=Mus musculus OX=10090 GN=Acad8 PE=1 SV=2	Q9D7B6	Isobutyryl-CoA dehydrogenase, mitochondrial	Acad8	2887	4630	2663	16181	10776	7443	9614	9586		2799	3798	3808	5293	6698	4133	8728	9955	9553		high	15	15	50.6
	sp|Q8JZN5|ACAD9_MOUSE Complex I assembly factor ACAD9, mitochondrial OS=Mus musculus OX=10090 GN=Acad9 PE=1 SV=2	Q8JZN5	Acyl-CoA dehydrogenase family member 9, mitochondrial	Acad9	14972	13462	16712	122148	87694	68469	72187	94065		15194	16007	14437	116596	121611	119718	77812	129730	88777		high	31	31	53.4
	sp|P51174|ACADL_MOUSE Long-chain specific acyl-CoA dehydrogenase, mitochondrial OS=Mus musculus OX=10090 GN=Acadl PE=1 SV=2	P51174	Long-chain specific acyl-CoA dehydrogenase, mitochondrial	Acadl	50203	44608	47571	156029	95113	96046	216406	148475		62841	67953	60829	118947	146351	99343	186859	156132	105271		high	21	21	50.9
	sp|P45952|ACADM_MOUSE Medium-chain specific acyl-CoA dehydrogenase, mitochondrial OS=Mus musculus OX=10090 GN=Acadm PE=1 SV=1	P45952	Medium-chain specific acyl-CoA dehydrogenase, mitochondrial	Acadm	11865	10507	14181	94014	71343	57671	121440	66949		18070	20505	15622	112725	110029	126846	109100	71485	94473		high	21	21	51.1
	sp|Q07417|ACADS_MOUSE Short-chain specific acyl-CoA dehydrogenase, mitochondrial OS=Mus musculus OX=10090 GN=Acads PE=1 SV=2	Q07417	Short-chain specific acyl-CoA dehydrogenase, mitochondrial	Acads	17669	20475	25098	66938	54130	38292	58335	62949		29185	27363	26094	40308	40749	36152	40479	47700	38193		high	22	22	61.9
	sp|Q9DBL1|ACDSB_MOUSE Short/branched chain specific acyl-CoA dehydrogenase, mitochondrial OS=Mus musculus OX=10090 GN=Acadsb PE=1 SV=1	Q9DBL1	Short/branched chain specific acyl-CoA dehydrogenase, mitochondrial	Acadsb	4514	7824	3690	22261	14156	7868	9170	8771		2497	4541	11900	6861	5240	6204	3528	4087	3998		high	13	13	35
	sp|P50544|ACADV_MOUSE Very long-chain specific acyl-CoA dehydrogenase, mitochondrial OS=Mus musculus OX=10090 GN=Acadvl PE=1 SV=3	P50544	Very long-chain specific acyl-CoA dehydrogenase, mitochondrial	Acadvl	20017	29358	30872	142310	135155	134020	99561	162407		27006	31085	30775	116882	110322	141098	83000	99946	95049		high	36	36	65.2
	sp|Q8K2H4|ACAP1_MOUSE Arf-GAP with coiled-coil, ANK repeat and PH domain-containing protein 1 OS=Mus musculus OX=10090 GN=Acap1 PE=1 SV=1	Q8K2H4	Arf-GAP with coiled-coil, ANK repeat and PH domain-containing protein 1	Acap1	14858	17107	15365	61888	39295	40133	54932	42718		28235	20802	21305	62084	66441	48490	41360	60924	41322		high	36	36	60
	sp|Q6ZQK5|ACAP2_MOUSE Arf-GAP with coiled-coil, ANK repeat and PH domain-containing protein 2 OS=Mus musculus OX=10090 GN=Acap2 PE=1 SV=2;sp|Q6ZQK5-2|ACAP2_MOUSE Isoform 2 of Arf-GAP with coiled-coil, ANK repeat and PH domain-containing protein 2 OS=Mus mu	Q6ZQK5;Q6ZQK5-2	Arf-GAP with coiled-coil, ANK repeat and PH domain-containing protein 2	Acap2	2148	4638	3339	8117	5728	4784	3157	5013		5731	5636	6218	6156	4676	7584	4365	4206	2384		high	29	26	44.5
	sp|Q8QZT1|THIL_MOUSE Acetyl-CoA acetyltransferase, mitochondrial OS=Mus musculus OX=10090 GN=Acat1 PE=1 SV=1	Q8QZT1	Acetyl-CoA acetyltransferase, mitochondrial	Acat1	37262	77467	81543	346470	139439	128735	312525	225651		53186	71077	81115	279932	657799	249545	452888	296460	122670		high	25	25	71.9
	sp|Q8CAY6|THIC_MOUSE Acetyl-CoA acetyltransferase, cytosolic OS=Mus musculus OX=10090 GN=Acat2 PE=1 SV=2	Q8CAY6	Acetyl-CoA acetyltransferase, cytosolic	Acat2	6155	9195	11268	79155	92035	84329	75641	123917		13131	11960	10978	142726	136573	165605	160823	173375	116975		high	17	17	70.3
	sp|Q8BMP6|GCP60_MOUSE Golgi resident protein GCP60 OS=Mus musculus OX=10090 GN=Acbd3 PE=1 SV=3	Q8BMP6	Golgi resident protein GCP60	Acbd3	5612	5133	6144	40922	28581	33850	35955	41533		13793	10638	14270	39734	45063	30189	29854	45175	31733		high	21	21	43.8
	sp|Q5XG73-3|ACBD5_MOUSE Isoform 3 of Acyl-CoA-binding domain-containing protein 5 OS=Mus musculus OX=10090 GN=Acbd5;sp|Q5XG73-2|ACBD5_MOUSE Isoform 2 of Acyl-CoA-binding domain-containing protein 5 OS=Mus musculus OX=10090 GN=Acbd5;sp|Q5XG73|ACBD5_MOUSE Ac	Q5XG73-3;Q5XG73-2;Q5XG73	Acyl-CoA-binding domain-containing protein 5	Acbd5	400	289	0	958	1762	572	1333	694		95	119	133	0	2466	460	164	1282	1067		medium	7	7	20.7
	sp|Q9D061|ACBD6_MOUSE Acyl-CoA-binding domain-containing protein 6 OS=Mus musculus OX=10090 GN=Acbd6 PE=1 SV=2	Q9D061;Q9D061-2;Q9D061-3	Acyl-CoA-binding domain-containing protein 6	Acbd6	0	0	0	7526	14060	15011	11645	7945		0	0	0	20450	28884	37484	15170	18372	26363		high	11	11	44.7
	sp|A2AIG8-2|1A1L1_MOUSE Isoform 2 of 1-aminocyclopropane-1-carboxylate synthase-like protein 1 OS=Mus musculus OX=10090 GN=Accs;sp|A2AIG8|1A1L1_MOUSE 1-aminocyclopropane-1-carboxylate synthase-like protein 1 OS=Mus musculus OX=10090 GN=Accs PE=2 SV=1	A2AIG8-2;A2AIG8	1-aminocyclopropane-1-carboxylate synthase-like protein 1	Accs	408	536	683	0	1447	2025	760	981		0	809	692	1709	1809	0	868	2131	760		high	8	8	24.2
	sp|Q5EE38|ACD_MOUSE Adrenocortical dysplasia protein OS=Mus musculus OX=10090 GN=Acd PE=1 SV=1	Q5EE38;Q5EE38-2;Q5EE38-3;Q5EE38-4	Adrenocortical dysplasia protein	Acd	167	401	631	3719	3743	2005	1283	2632		182	1274	995	5212	8217	3860	2232	4926	1799		high	10	10	45.4
	sp|Q9JIX8-4|ACINU_MOUSE Isoform 4 of Apoptotic chromatin condensation inducer in the nucleus OS=Mus musculus OX=10090 GN=Acin1;sp|Q9JIX8|ACINU_MOUSE Apoptotic chromatin condensation inducer in the nucleus OS=Mus musculus OX=10090 GN=Acin1 PE=1 SV=3;sp|Q9JI	Q9JIX8-4;Q9JIX8;Q9JIX8-3;Q9JIX8-2	Apoptotic chromatin condensation inducer in the nucleus	Acin1	27968	33378	34918	159811	117224	85043	108449	120126		29510	44571	47272	157681	160005	168971	193394	135987	96138		high	68	68	55.9
	sp|Q91V92|ACLY_MOUSE ATP-citrate synthase OS=Mus musculus OX=10090 GN=Acly PE=1 SV=1	Q91V92	ATP-citrate synthase	Acly	13218	16612	16979	318131	279405	189831	246037	246320		12172	13623	17340	298879	302771	327705	248148	276075	196875		high	61	61	59
	sp|P28271|ACOC_MOUSE Cytoplasmic aconitate hydratase OS=Mus musculus OX=10090 GN=Aco1 PE=1 SV=3	P28271	Cytoplasmic aconitate hydratase	Aco1	4811	7096	8194	29409	29623	22177	26603	31931		5646	9063	6040	29535	19105	19439	26279	27763	14791		high	43	42	56.6
	sp|Q99KI0|ACON_MOUSE Aconitate hydratase, mitochondrial OS=Mus musculus OX=10090 GN=Aco2 PE=1 SV=1	Q99KI0	Aconitate hydratase, mitochondrial	Aco2	103148	120800	143037	975685	664452	602313	541925	698577		158307	157455	139922	898559	863383	848174	700217	817737	642560		high	58	58	74.7
	sp|Q8VHQ9|ACO11_MOUSE Acyl-coenzyme A thioesterase 11 OS=Mus musculus OX=10090 GN=Acot11 PE=1 SV=1	Q8VHQ9	Acyl-coenzyme A thioesterase 11	Acot11	0	0	0	0	0	0	0	0		458	445	276	0	0	0	0	0	0		medium	4	4	10.1
	sp|Q9CQR4|ACO13_MOUSE Acyl-coenzyme A thioesterase 13 OS=Mus musculus OX=10090 GN=Acot13 PE=1 SV=1	Q9CQR4	Acyl-coenzyme A thioesterase 13;Acyl-coenzyme A thioesterase 13, N-terminally processed	Acot13	29100	25434	33031	112103	99433	100376	112516	100561		32250	47619	41694	96905	92466	106711	70069	102142	73514		medium	7	7	65
	sp|Q9QYR9|ACOT2_MOUSE Acyl-coenzyme A thioesterase 2, mitochondrial OS=Mus musculus OX=10090 GN=Acot2 PE=1 SV=2	Q9QYR9	Acyl-coenzyme A thioesterase 2, mitochondrial	Acot2	12322	14800	19438	75424	61151	46620	77250	67447		22039	20736	20886	49026	42759	29338	54322	42973	33964		medium	19	10	56.7
	sp|Q91V12-2|BACH_MOUSE Isoform A of Cytosolic acyl coenzyme A thioester hydrolase OS=Mus musculus OX=10090 GN=Acot7;sp|Q91V12-4|BACH_MOUSE Isoform D of Cytosolic acyl coenzyme A thioester hydrolase OS=Mus musculus OX=10090 GN=Acot7;sp|Q91V12|BACH_MOUSE Cyt	Q91V12-2;Q91V12-4;Q91V12;Q91V12-3	Cytosolic acyl coenzyme A thioester hydrolase	Acot7	7475	5661	6704	915056	786288	635010	502397	650853		6938	13269	12724	582028	565539	751685	486956	487459	505858		high	21	21	66
	sp|P58137|ACOT8_MOUSE Acyl-coenzyme A thioesterase 8 OS=Mus musculus OX=10090 GN=Acot8 PE=1 SV=1	P58137	Acyl-coenzyme A thioesterase 8	Acot8	1095	906	1165	8554	14620	8541	12020	2182		1544	1648	2333	14059	9524	19235	5711	11260	11844		high	9	9	40
	sp|Q9R0X4|ACOT9_MOUSE Acyl-coenzyme A thioesterase 9, mitochondrial OS=Mus musculus OX=10090 GN=Acot9 PE=1 SV=1	Q9R0X4	Acyl-coenzyme A thioesterase 9, mitochondrial	Acot9	34223	34848	36326	108829	82180	68051	0	107129		41885	53956	47722	107352	87082	115602	0	101298	62542		medium	31	16	64
	sp|Q9R0H0-2|ACOX1_MOUSE Isoform 2 of Peroxisomal acyl-coenzyme A oxidase 1 OS=Mus musculus OX=10090 GN=Acox1;sp|Q9R0H0|ACOX1_MOUSE Peroxisomal acyl-coenzyme A oxidase 1 OS=Mus musculus OX=10090 GN=Acox1 PE=1 SV=5	Q9R0H0-2;Q9R0H0	Peroxisomal acyl-coenzyme A oxidase 1	Acox1	43	0	0	0	316	230	0	0		0	0	0	72	427	240	0	504	0		medium	3	3	8.3
	sp|Q9EPL9|ACOX3_MOUSE Peroxisomal acyl-coenzyme A oxidase 3 OS=Mus musculus OX=10090 GN=Acox3 PE=1 SV=2	Q9EPL9	Peroxisomal acyl-coenzyme A oxidase 3	Acox3	1361	1604	1709	2959	5689	3122	3569	1736		2158	1735	3114	2655	2647	2144	2137	361	0		high	17	16	31.7
	sp|Q9D358|PPAC_MOUSE Low molecular weight phosphotyrosine protein phosphatase OS=Mus musculus OX=10090 GN=Acp1 PE=1 SV=3	Q9D358	Low molecular weight phosphotyrosine protein phosphatase	Acp1	4683	6559	7309	305667	196646	191075	121783	165281		7893	7243	8459	263773	225476	295588	166894	268119	162250		low	11	3	72.2
	sp|Q9D358-2|PPAC_MOUSE Isoform 2 of Low molecular weight phosphotyrosine protein phosphatase OS=Mus musculus OX=10090 GN=Acp1	Q9D358-2	Low molecular weight phosphotyrosine protein phosphatase	Acp1	0	931	1134	16715	12617	9031	12624	11203		0	2156	2804	12706	13442	15239	11128	13856	9737		low	1	1	65.8
	sp|Q05117|PPA5_MOUSE Tartrate-resistant acid phosphatase type 5 OS=Mus musculus OX=10090 GN=Acp5 PE=1 SV=2	Q05117	Tartrate-resistant acid phosphatase type 5	Acp5	641	409	556	2547	0	0	508	1101		4572	3984	3934	3283	2621	2161	666	2239	0		medium	6	6	34.9
	sp|Q8BP40|PPA6_MOUSE Lysophosphatidic acid phosphatase type 6 OS=Mus musculus OX=10090 GN=Acp6 PE=1 SV=1	Q8BP40;Q8BP40-2	Lysophosphatidic acid phosphatase type 6	Acp6	492	531	5794	22042	6543	20183	17538	35327		4564	1781	4344	10344	8271	9004	17683	12390	23612		high	16	16	44.3
	sp|Q8VCW8|ACSF2_MOUSE Medium-chain acyl-CoA ligase ACSF2, mitochondrial OS=Mus musculus OX=10090 GN=Acsf2 PE=1 SV=1	Q8VCW8	Acyl-CoA synthetase family member 2, mitochondrial	Acsf2	7908	12599	9102	31812	21064	30203	16328	35337		33781	27336	31283	41985	44376	51867	26141	38083	34436		high	25	25	48
	sp|Q3URE1|ACSF3_MOUSE Malonate--CoA ligase ACSF3, mitochondrial OS=Mus musculus OX=10090 GN=Acsf3 PE=1 SV=2;sp|Q3URE1-2|ACSF3_MOUSE Isoform 2 of Malonate--CoA ligase ACSF3, mitochondrial OS=Mus musculus OX=10090 GN=Acsf3	Q3URE1;Q3URE1-2	Acyl-CoA synthetase family member 3, mitochondrial	Acsf3	358	339	882	2737	2492	2996	13867	5183		796	208	363	7577	7496	3400	4199	2668	2478		high	19	19	40.1
	sp|P41216|ACSL1_MOUSE Long-chain-fatty-acid--CoA ligase 1 OS=Mus musculus OX=10090 GN=Acsl1 PE=1 SV=2	P41216	Long-chain-fatty-acid--CoA ligase 1	Acsl1	753	491	536	6624	5540	5368	4959	3243		551	71	167	5445	6746	2807	3142	3566	2952		high	17	17	32.5
	sp|Q9CZW4|ACSL3_MOUSE Long-chain-fatty-acid--CoA ligase 3 OS=Mus musculus OX=10090 GN=Acsl3 PE=1 SV=2	Q9CZW4	Long-chain-fatty-acid--CoA ligase 3	Acsl3	117	115	27	3418	5330	628	8223	3715		0	0	0	2849	3261	2149	3210	3768	864		high	17	17	38.1
	sp|Q9QUJ7-2|ACSL4_MOUSE Isoform Short of Long-chain-fatty-acid--CoA ligase 4 OS=Mus musculus OX=10090 GN=Acsl4;sp|Q9QUJ7|ACSL4_MOUSE Long-chain-fatty-acid--CoA ligase 4 OS=Mus musculus OX=10090 GN=Acsl4 PE=1 SV=2	Q9QUJ7-2;Q9QUJ7	Long-chain-fatty-acid--CoA ligase 4	Acsl4	2421	4478	4507	184884	176835	124274	95236	133773		6477	6610	6401	203507	213837	203581	146980	213819	158056		high	37	35	69.9
	sp|Q8JZR0|ACSL5_MOUSE Long-chain-fatty-acid--CoA ligase 5 OS=Mus musculus OX=10090 GN=Acsl5 PE=1 SV=1	Q8JZR0	Long-chain-fatty-acid--CoA ligase 5	Acsl5	4763	7987	6405	52369	44801	27541	35880	43531		7076	9542	9575	49907	45217	39206	42344	64757	43088		high	28	26	50.1
	sp|Q91WC3|ACSL6_MOUSE Long-chain-fatty-acid--CoA ligase 6 OS=Mus musculus OX=10090 GN=Acsl6 PE=1 SV=1;sp|Q91WC3-2|ACSL6_MOUSE Isoform 2 of Long-chain-fatty-acid--CoA ligase 6 OS=Mus musculus OX=10090 GN=Acsl6	Q91WC3;Q91WC3-2	Long-chain-fatty-acid--CoA ligase 6	Acsl6	0	0	0	0	0	210	0	0		0	0	0	0	475	1526	859	1790	759		medium	3	3	5.6
	sp|Q99NB1|ACS2L_MOUSE Acetyl-coenzyme A synthetase 2-like, mitochondrial OS=Mus musculus OX=10090 GN=Acss1 PE=1 SV=1	Q99NB1	Acetyl-coenzyme A synthetase 2-like, mitochondrial	Acss1	7647	9295	6247	1457	3269	5543	3449	9172		13373	15646	14067	5680	2105	6352	3897	5981	3626		high	22	22	45.6
	sp|Q9QXG4|ACSA_MOUSE Acetyl-coenzyme A synthetase, cytoplasmic OS=Mus musculus OX=10090 GN=Acss2 PE=1 SV=2	Q9QXG4	Acetyl-coenzyme A synthetase, cytoplasmic	Acss2	15511	18049	15610	20933	21236	12254	19195	26184		11296	13955	17888	5447	9339	3942	13016	8435	5926		high	27	27	50.2
	sp|P60710|ACTB_MOUSE Actin, cytoplasmic 1 OS=Mus musculus OX=10090 GN=Actb PE=1 SV=1	P60710	Actin, cytoplasmic 1;Actin, cytoplasmic 1, N-terminally processed	Actb	27660	21728	66300	2278693	1947867	1313276	1613360	2395393		69108	102589	60630	1181794	1398568	1555185	1217309	2116169	1136912		low	2	2	84.8
	sp|Q8BFZ3|ACTBL_MOUSE Beta-actin-like protein 2 OS=Mus musculus OX=10090 GN=Actbl2 PE=1 SV=1	Q8BFZ3	Beta-actin-like protein 2	Actbl2	218689	243999	540845	4466867	4873836	676652	5372419	7422962		610939	822708	592702	4202226	5491029	1117890	3734271	5007536	1091768		medium	7	7	44.9
	sp|P68033|ACTC_MOUSE Actin, alpha cardiac muscle 1 OS=Mus musculus OX=10090 GN=Actc1 PE=1 SV=1;sp|P62737|ACTA_MOUSE Actin, aortic smooth muscle OS=Mus musculus OX=10090 GN=Acta2 PE=1 SV=1;sp|P63268|ACTH_MOUSE Actin, gamma-enteric smooth muscle OS=Mus muscu	P68033;P62737;P63268	Actin, alpha cardiac muscle 1;Actin, aortic smooth muscle;Actin, gamma-enteric smooth muscle	Actc1;Acta2;Actg2	515408	920605	1182643	8603155	7212363	3625702	4807391	6289077		1752173	1110013	958312	4191049	5053611	3606565	4433894	6439303	6567870		low	10	2	66.8
	sp|P63260|ACTG_MOUSE Actin, cytoplasmic 2 OS=Mus musculus OX=10090 GN=Actg1 PE=1 SV=1	P63260	Actin, cytoplasmic 2;Actin, cytoplasmic 2, N-terminally processed	Actg1	9788668	11955098	17878490	67418703	56660156	45081065	55143132	62011071		16506820	16885862	13634584	51271485	58355820	52204395	39124274	54573230	57191009		low	52	3	85.1
	sp|Q9Z2N8|ACL6A_MOUSE Actin-like protein 6A OS=Mus musculus OX=10090 GN=Actl6a PE=1 SV=2	Q9Z2N8	Actin-like protein 6A	Actl6a	28627	39357	27998	307686	271723	179435	262994	258276		37704	39073	45032	283577	305574	315590	224890	278667	352522		high	22	19	52.7
	sp|Q7TPR4|ACTN1_MOUSE Alpha-actinin-1 OS=Mus musculus OX=10090 GN=Actn1 PE=1 SV=1	Q7TPR4	Alpha-actinin-1	Actn1	194147	256893	265988	1169133	1115331	748327	755827	985716		266273	284337	306573	757111	700817	701580	566275	669973	472808		high	45	40	81.7
	sp|Q9JI91|ACTN2_MOUSE Alpha-actinin-2 OS=Mus musculus OX=10090 GN=Actn2 PE=1 SV=2	Q9JI91	Alpha-actinin-2	Actn2	1001	952	846	2046	0	0	0	3936		42460	1410	0	1734	0	0	1435	0	1441		medium	3	2	21.4
	sp|P57780|ACTN4_MOUSE Alpha-actinin-4 OS=Mus musculus OX=10090 GN=Actn4 PE=1 SV=1	P57780	Alpha-actinin-4	Actn4	157508	197491	191245	1186164	910774	652886	702333	925799		194780	187518	206202	1098638	1110267	1165004	793587	1305547	691260		medium	80	49	81.2
	sp|Q9QZB7|ARP10_MOUSE Actin-related protein 10 OS=Mus musculus OX=10090 GN=Actr10 PE=1 SV=2	Q9QZB7	Actin-related protein 10	Actr10	1380	2104	2637	28266	27812	17255	12064	16822		3561	5172	4364	34891	32375	32151	22684	24884	32130		high	16	16	51.1
	sp|P61164|ACTZ_MOUSE Alpha-centractin OS=Mus musculus OX=10090 GN=Actr1a PE=1 SV=1	P61164	Alpha-centractin	Actr1a	17820	17246	20650	150171	112472	109916	127666	125754		30511	30729	38766	115882	173582	177215	112721	214415	129695		low	21	10	64.4
	sp|Q8R5C5|ACTY_MOUSE Beta-centractin OS=Mus musculus OX=10090 GN=Actr1b PE=1 SV=1	Q8R5C5	Beta-centractin	Actr1b	2090	2006	2477	29699	22847	21203	33440	31747		7953	5688	4012	37885	41387	23707	20559	36737	27033		medium	7	7	60.9
	sp|P61161|ARP2_MOUSE Actin-related protein 2 OS=Mus musculus OX=10090 GN=Actr2 PE=1 SV=1	P61161	Actin-related protein 2	Actr2	157703	137841	150003	1200431	1000703	915883	993063	901826		148198	206106	148107	1003035	1023653	1047156	665804	911643	738468		high	30	30	72.8
	sp|Q99JY9|ARP3_MOUSE Actin-related protein 3 OS=Mus musculus OX=10090 GN=Actr3 PE=1 SV=3	Q99JY9;Q641P0;Q641P0-2	Actin-related protein 3	Actr3	166898	131482	253062	1745206	1389125	1263689	1064542	1454197		231973	309646	220054	1303762	1557733	1476788	1266942	1597406	1218144		high	32	32	77.5
	sp|Q80US4|ARP5_MOUSE Actin-related protein 5 OS=Mus musculus OX=10090 GN=Actr5 PE=1 SV=3	Q80US4;Q80US4-3	Actin-related protein 5	Actr5	44	153	459	16638	17479	10022	7627	7685		1573	508	864	16382	15406	20332	8351	18516	11980		high	21	21	47.8
	sp|Q9D864|ARP6_MOUSE Actin-related protein 6 OS=Mus musculus OX=10090 GN=Actr6 PE=1 SV=2	Q9D864	Actin-related protein 6	Actr6	228	635	495	3598	6174	0	3143	4172		132	654	581	6195	4238	8309	1435	2250	6192		high	11	11	36.6
	sp|Q8R2S9|ARP8_MOUSE Actin-related protein 8 OS=Mus musculus OX=10090 GN=Actr8 PE=2 SV=1	Q8R2S9	Actin-related protein 8	Actr8	950	817	1087	6566	7198	8527	5514	7032		1238	938	761	13510	11498	18232	14205	3666	9280		high	20	20	43.1
	sp|Q99JW2|ACY1_MOUSE Aminoacylase-1 OS=Mus musculus OX=10090 GN=Acy1 PE=1 SV=1	Q99JW2	Aminoacylase-1	Acy1	2610	5501	6195	83091	64387	56528	34095	52203		5569	6658	7452	59336	70855	61505	40096	50890	49603		high	21	21	54.7
	sp|P56376|ACYP1_MOUSE Acylphosphatase-1 OS=Mus musculus OX=10090 GN=Acyp1 PE=1 SV=2	P56376	Acylphosphatase-1	Acyp1	8826	11735	16173	41020	35878	25766	27953	60786		39513	34368	39051	93019	59832	212325	35410	90773	21458		medium	7	7	69.7
	sp|P03958|ADA_MOUSE Adenosine deaminase OS=Mus musculus OX=10090 GN=Ada PE=1 SV=3	P03958	Adenosine deaminase	Ada	9465	17238	20411	119080	87536	71871	65788	80060		15178	19074	18396	72522	80964	87236	73482	92380	47358		high	22	22	69.3
	sp|Q80SY6|ADAL_MOUSE Adenosine deaminase-like protein OS=Mus musculus OX=10090 GN=Adal PE=2 SV=1;sp|Q80SY6-2|ADAL_MOUSE Isoform 2 of Adenosine deaminase-like protein OS=Mus musculus OX=10090 GN=Adal;sp|Q80SY6-4|ADAL_MOUSE Isoform 4 of Adenosine deaminase-l	Q80SY6;Q80SY6-2;Q80SY6-4	Adenosine deaminase-like protein	Adal	0	0	308	0	731	1585	619	144		0	75	645	289	0	2044	818	0	1527		medium	4	4	9.2
	sp|O35598|ADA10_MOUSE Disintegrin and metalloproteinase domain-containing protein 10 OS=Mus musculus OX=10090 GN=Adam10 PE=1 SV=2	O35598	Disintegrin and metalloproteinase domain-containing protein 10	Adam10	1531	1985	1905	25383	16785	14402	19380	12509		2630	2781	2524	37665	30394	33574	41679	22779	21035		high	30	30	50.7
	sp|Q9Z0F8|ADA17_MOUSE Disintegrin and metalloproteinase domain-containing protein 17 OS=Mus musculus OX=10090 GN=Adam17 PE=1 SV=3;sp|Q9Z0F8-2|ADA17_MOUSE Isoform Short of Disintegrin and metalloproteinase domain-containing protein 17 OS=Mus musculus OX=100	Q9Z0F8;Q9Z0F8-2	Disintegrin and metalloproteinase domain-containing protein 17	Adam17	91	215	42	2158	3813	2483	2867	3372		334	107	299	6131	4361	2410	1169	2412	3819		high	15	15	29.1
	tr|E9PY16|E9PY16_MOUSE ArfGAP with dual PH domains 1 OS=Mus musculus OX=10090 GN=Adap1 PE=1 SV=1;sp|Q8R2V5|ADAP2_MOUSE Arf-GAP with dual PH domain-containing protein 2 OS=Mus musculus OX=10090 GN=Adap2 PE=1 SV=1	E9PY16;Q8R2V5	Arf-GAP with dual PH domain-containing protein 2	Adap1;Adap2	0	0	0	0	0	175	0	234		0	0	0	292	297	0	0	0	0		low	2	2	5.9
	sp|Q99MU3|DSRAD_MOUSE Double-stranded RNA-specific adenosine deaminase OS=Mus musculus OX=10090 GN=Adar PE=1 SV=2;sp|Q99MU3-5|DSRAD_MOUSE Isoform 5 of Double-stranded RNA-specific adenosine deaminase OS=Mus musculus OX=10090 GN=Adar;sp|Q99MU3-4|DSRAD_MOUSE	Q99MU3;Q99MU3-5;Q99MU3-4	Double-stranded RNA-specific adenosine deaminase	Adar	1128	2096	2196	18617	13306	13575	11971	13169		1836	2624	1790	19633	19972	18507	17669	14533	11376		low	42	2	49.7
	sp|Q99MU3-2|DSRAD_MOUSE Isoform 2 of Double-stranded RNA-specific adenosine deaminase OS=Mus musculus OX=10090 GN=Adar;sp|Q99MU3-3|DSRAD_MOUSE Isoform 3 of Double-stranded RNA-specific adenosine deaminase OS=Mus musculus OX=10090 GN=Adar	Q99MU3-2;Q99MU3-3	Double-stranded RNA-specific adenosine deaminase	Adar	212	274	226	0	0	0	0	0		295	213	178	1764	670	1642	0	0	0		low	1	1	51.4
	sp|Q91ZS8-5|RED1_MOUSE Isoform 5 of Double-stranded RNA-specific editase 1 OS=Mus musculus OX=10090 GN=Adarb1;sp|Q91ZS8-4|RED1_MOUSE Isoform 4 of Double-stranded RNA-specific editase 1 OS=Mus musculus OX=10090 GN=Adarb1;sp|Q91ZS8-3|RED1_MOUSE Isoform 3 of	Q91ZS8-5;Q91ZS8-4;Q91ZS8-3;Q91ZS8-2;Q91ZS8;Q91ZS8-6	Double-stranded RNA-specific editase 1	Adarb1	0	0	0	3398	0	769	1034	242		0	0	0	3306	3547	1790	1956	1111	1527		high	10	10	21.4
	sp|Q9JHI2|ADAT1_MOUSE tRNA-specific adenosine deaminase 1 OS=Mus musculus OX=10090 GN=Adat1 PE=1 SV=1;sp|Q9JHI2-2|ADAT1_MOUSE Isoform 2 of tRNA-specific adenosine deaminase 1 OS=Mus musculus OX=10090 GN=Adat1;sp|Q9JHI2-3|ADAT1_MOUSE Isoform 3 of tRNA-speci	Q9JHI2;Q9JHI2-2;Q9JHI2-3	tRNA-specific adenosine deaminase 1	Adat1	58	120	84	5153	2972	1718	2626	3416		119	205	0	7590	5076	8510	5065	6678	4284		high	16	16	41.1
	sp|Q6P6J0|ADAT2_MOUSE tRNA-specific adenosine deaminase 2 OS=Mus musculus OX=10090 GN=Adat2 PE=1 SV=1	Q6P6J0	tRNA-specific adenosine deaminase 2	Adat2	118	0	0	13421	4115	1553	2966	3396		0	0	106	29444	22518	19312	4516	25289	2613		medium	5	5	48.7
	sp|Q6PAT0|ADAT3_MOUSE Probable inactive tRNA-specific adenosine deaminase-like protein 3 OS=Mus musculus OX=10090 GN=Adat3 PE=1 SV=1	Q6PAT0	Probable inactive tRNA-specific adenosine deaminase-like protein 3	Adat3	0	227	475	3241	6164	2822	2295	1837		0	513	579	6950	8465	4882	6724	5569	4672		high	10	10	43.8
	sp|Q9D0L4|ADCK1_MOUSE AarF domain-containing protein kinase 1 OS=Mus musculus OX=10090 GN=Adck1 PE=1 SV=1;sp|Q9D0L4-2|ADCK1_MOUSE Isoform 2 of AarF domain-containing protein kinase 1 OS=Mus musculus OX=10090 GN=Adck1	Q9D0L4;Q9D0L4-2	Uncharacterized aarF domain-containing protein kinase 1	Adck1	232	201	183	4439	3912	3162	3061	1828		290	6121	384	3435	4590	2588	2530	10057	4767		high	13	13	37
	sp|Q60936|COQ8A_MOUSE Atypical kinase COQ8A, mitochondrial OS=Mus musculus OX=10090 GN=Coq8a PE=1 SV=2;sp|Q60936-2|COQ8A_MOUSE Isoform 2 of Atypical kinase COQ8A, mitochondrial OS=Mus musculus OX=10090 GN=Coq8a	Q60936;Q60936-2	Atypical kinase ADCK3, mitochondrial	Adck3	34	0	0	0	0	0	180	0		42	67	44	0	0	0	0	0	0		low	2	2	3.7
	sp|Q566J8|COQ8B_MOUSE Atypical kinase COQ8B, mitochondrial OS=Mus musculus OX=10090 GN=Coq8b PE=1 SV=1	Q566J8	AarF domain-containing protein kinase 4	Adck4	108	176	275	2682	5262	5334	5396	4827		182	184	191	4360	4516	11695	9526	6200	4583		high	9	9	27.4
	sp|Q80V03|ADCK5_MOUSE Uncharacterized aarF domain-containing protein kinase 5 OS=Mus musculus OX=10090 GN=Adck5 PE=2 SV=2;sp|Q80V03-2|ADCK5_MOUSE Isoform 2 of Uncharacterized aarF domain-containing protein kinase 5 OS=Mus musculus OX=10090 GN=Adck5	Q80V03;Q80V03-2	Uncharacterized aarF domain-containing protein kinase 5	Adck5	61	28	46	502	3044	170	244	0		25	0	45	672	388	1320	0	447	0		medium	6	6	13.2
	sp|Q8VHH7|ADCY3_MOUSE Adenylate cyclase type 3 OS=Mus musculus OX=10090 GN=Adcy3 PE=1 SV=2	Q8VHH7	Adenylate cyclase type 3	Adcy3	0	0	27	0	0	238	0	81		20	99	90	0	0	0	0	0	96		medium	4	4	5.4
	sp|P51829|ADCY7_MOUSE Adenylate cyclase type 7 OS=Mus musculus OX=10090 GN=Adcy7 PE=1 SV=2	P51829	Adenylate cyclase type 7	Adcy7	514	312	123	383	240	607	0	236		316	1133	1288	308	0	537	251	0	218		high	14	13	16.1
	sp|Q9QYC0|ADDA_MOUSE Alpha-adducin OS=Mus musculus OX=10090 GN=Add1 PE=1 SV=2;sp|Q9QYC0-2|ADDA_MOUSE Isoform 2 of Alpha-adducin OS=Mus musculus OX=10090 GN=Add1	Q9QYC0;Q9QYC0-2	Alpha-adducin	Add1	32820	47094	43346	100318	96830	77804	61404	99382		34199	42788	42094	72036	71420	95841	66747	71961	66674		high	37	37	61.9
	sp|Q9QYB5-2|ADDG_MOUSE Isoform 1 of Gamma-adducin OS=Mus musculus OX=10090 GN=Add3	Q9QYB5-2	Gamma-adducin	Add3	56226	61408	56614	62284	55553	54222	64946	59902		50054	70056	65719	59472	68812	38427	29844	64393	42223		low	38	1	57.3
	sp|Q9QYB5|ADDG_MOUSE Gamma-adducin OS=Mus musculus OX=10090 GN=Add3 PE=1 SV=2	Q9QYB5	Gamma-adducin	Add3	259	242	391	0	0	0	0	0		407	140	222	0	0	0	0	0	0		low	1	1	54.2
	sp|P00329|ADH1_MOUSE Alcohol dehydrogenase 1 OS=Mus musculus OX=10090 GN=Adh1 PE=1 SV=2	P00329	Alcohol dehydrogenase 1	Adh1	11350	9842	12053	31359	42471	50844	68221	100749		267	398	637	0	0	0	0	0	0		high	16	16	53.9
	sp|P28474|ADHX_MOUSE Alcohol dehydrogenase class-3 OS=Mus musculus OX=10090 GN=Adh5 PE=1 SV=3	P28474;Q64437	Alcohol dehydrogenase class-3	Adh5	106285	133564	116748	694338	521268	502000	577962	818003		138202	157093	169486	698075	677914	546772	616495	842995	493889		high	22	22	73.3
	sp|Q99JT9|MTND_MOUSE 1,2-dihydroxy-3-keto-5-methylthiopentene dioxygenase OS=Mus musculus OX=10090 GN=Adi1 PE=1 SV=1	Q99JT9	1,2-dihydroxy-3-keto-5-methylthiopentene dioxygenase	Adi1	5866	12917	14815	59087	52577	52364	56808	68659		6722	15916	20038	36640	57169	92689	51138	63995	31535		high	13	13	66.5
	sp|P55264|ADK_MOUSE Adenosine kinase OS=Mus musculus OX=10090 GN=Adk PE=1 SV=2;sp|P55264-2|ADK_MOUSE Isoform Short of Adenosine kinase OS=Mus musculus OX=10090 GN=Adk	P55264;P55264-2	Adenosine kinase	Adk	26234	33210	48503	464897	310809	339798	233057	281299		34356	42048	42104	293465	291359	334593	261508	285091	291368		high	18	18	45.7
	sp|Q9Z103|ADNP_MOUSE Activity-dependent neuroprotector homeobox protein OS=Mus musculus OX=10090 GN=Adnp PE=1 SV=2	Q9Z103	Activity-dependent neuroprotector homeobox protein	Adnp	4880	6267	4899	35665	22905	15877	24792	22687		3828	5675	6899	37277	43100	43730	23535	28934	23424		high	52	52	60.4
	sp|Q8CHC8|ADNP2_MOUSE Activity-dependent neuroprotector homeobox protein 2 OS=Mus musculus OX=10090 GN=Adnp2 PE=2 SV=2	Q8CHC8	ADNP homeobox protein 2	Adnp2	36	90	31	1875	907	1094	709	798		92	206	255	1291	2156	952	1198	1505	1213		high	11	11	16.1
	sp|Q6PDY2|AEDO_MOUSE 2-aminoethanethiol dioxygenase OS=Mus musculus OX=10090 GN=Ado PE=1 SV=2	Q6PDY2	2-aminoethanethiol dioxygenase	Ado	1642	952	4018	26592	23846	25692	15053	30872		4541	8041	8300	34961	20927	57053	25906	29223	30874		high	15	15	70.7
	sp|Q8VDL4|ADPGK_MOUSE ADP-dependent glucokinase OS=Mus musculus OX=10090 GN=Adpgk PE=1 SV=2;sp|Q8VDL4-3|ADPGK_MOUSE Isoform 3 of ADP-dependent glucokinase OS=Mus musculus OX=10090 GN=Adpgk	Q8VDL4;Q8VDL4-3;Q8VDL4-2	ADP-dependent glucokinase	Adpgk	7717	10451	11319	30051	39437	42801	37569	50820		8694	9769	12646	48612	47681	53167	41753	43677	52830		high	16	16	41.1
	sp|P54923|ADPRH_MOUSE [Protein ADP-ribosylarginine] hydrolase OS=Mus musculus OX=10090 GN=Adprh PE=1 SV=1	P54923	[Protein ADP-ribosylarginine] hydrolase	Adprh	11643	19683	18718	137329	112809	83245	75665	169186		26455	29876	34071	144346	116599	139530	107577	162408	108241		high	24	24	78.7
	sp|Q8CG72|ADPRS_MOUSE ADP-ribose glycohydrolase ARH3 OS=Mus musculus OX=10090 GN=Adprs PE=1 SV=1;sp|Q8CG72-2|ADPRS_MOUSE Isoform 2 of ADP-ribose glycohydrolase ARH3 OS=Mus musculus OX=10090 GN=Adprs	Q8CG72;Q8CG72-2	Poly(ADP-ribose) glycohydrolase ARH3	Adprhl2	11259	12498	16927	45061	36251	46013	48082	49235		25182	23618	22707	61777	51802	51725	45073	59494	51757		high	10	10	34.1
	sp|Q99KS6-2|ADPRM_MOUSE Isoform 2 of Manganese-dependent ADP-ribose/CDP-alcohol diphosphatase OS=Mus musculus OX=10090 GN=Adprm;sp|Q99KS6|ADPRM_MOUSE Manganese-dependent ADP-ribose/CDP-alcohol diphosphatase OS=Mus musculus OX=10090 GN=Adprm PE=1 SV=1	Q99KS6-2;Q99KS6	Manganese-dependent ADP-ribose/CDP-alcohol diphosphatase	Adprm	1328	1204	2086	24877	19195	1850	879	16643		4143	2929	2188	19069	4967	29893	10796	14738	10699		medium	3	3	32.2
	sp|Q99MK8|ARBK1_MOUSE Beta-adrenergic receptor kinase 1 OS=Mus musculus OX=10090 GN=Grk2 PE=1 SV=2	Q99MK8	Beta-adrenergic receptor kinase 1	Adrbk1	15673	22454	24272	83700	92606	64348	58223	60892		26122	26054	28308	63170	47590	63808	64082	64311	37892		high	39	30	55.3
	sp|Q9JKV1|ADRM1_MOUSE Proteasomal ubiquitin receptor ADRM1 OS=Mus musculus OX=10090 GN=Adrm1 PE=1 SV=2	Q9JKV1	Proteasomal ubiquitin receptor ADRM1	Adrm1	3457	4328	5229	140657	90018	103828	82985	68835		9451	6722	5409	113896	139724	128680	148822	128216	96387		high	11	11	27.3
	sp|P54822|PUR8_MOUSE Adenylosuccinate lyase OS=Mus musculus OX=10090 GN=Adsl PE=1 SV=2	P54822	Adenylosuccinate lyase	Adsl	43871	36842	52799	693120	466265	330938	369879	544397		81269	78619	67275	776331	738065	732502	569558	822185	423378		high	32	32	66.1
	sp|P46664|PURA2_MOUSE Adenylosuccinate synthetase isozyme 2 OS=Mus musculus OX=10090 GN=Adss2 PE=1 SV=2	P46664;P28650;P28650-2	Adenylosuccinate synthetase isozyme 2	Adss	15199	19750	23221	754789	554498	554504	509976	572452		32099	29088	30901	713602	831293	683339	667586	821984	646780		high	28	28	61.6
	sp|Q9Z248-2|AEBP2_MOUSE Isoform 2 of Zinc finger protein AEBP2 OS=Mus musculus OX=10090 GN=Aebp2;sp|Q9Z248|AEBP2_MOUSE Zinc finger protein AEBP2 OS=Mus musculus OX=10090 GN=Aebp2 PE=1 SV=2;sp|Q9Z248-5|AEBP2_MOUSE Isoform 5 of Zinc finger protein AEBP2 OS=M	Q9Z248-2;Q9Z248;Q9Z248-5;Q9Z248-4;Q9Z248-3	Zinc finger protein AEBP2	Aebp2	215	154	219	12176	20864	19231	7255	13207		171	416	324	20061	22271	15376	15843	12965	20416		high	15	15	49
	sp|Q9CZI9|AEN_MOUSE Apoptosis-enhancing nuclease OS=Mus musculus OX=10090 GN=Aen PE=2 SV=1;sp|Q9CZI9-2|AEN_MOUSE Isoform 2 of Apoptosis-enhancing nuclease OS=Mus musculus OX=10090 GN=Aen	Q9CZI9;Q9CZI9-2	Apoptosis-enhancing nuclease	Aen	0	0	0	20426	13133	20536	15045	7744		0	0	0	28442	33030	55182	17626	25123	25431		medium	6	6	32.7
	sp|P51827|AFF3_MOUSE AF4/FMR2 family member 3 OS=Mus musculus OX=10090 GN=Aff3 PE=1 SV=2;sp|P51827-2|AFF3_MOUSE Isoform 2 of AF4/FMR2 family member 3 OS=Mus musculus OX=10090 GN=Aff3	P51827;P51827-2	AF4/FMR2 family member 3	Aff3	149	209	125	417	815	0	1393	142		175	220	217	18	306	400	73	168	0		high	12	12	15.5
	sp|Q9ESC8|AFF4_MOUSE AF4/FMR2 family member 4 OS=Mus musculus OX=10090 GN=Aff4 PE=1 SV=1	Q9ESC8	AF4/FMR2 family member 4	Aff4	0	39	0	1545	1565	1417	983	468		0	0	0	903	1102	1077	429	2019	1373		high	10	10	13.6
	sp|Q920A7|AFG31_MOUSE AFG3-like protein 1 OS=Mus musculus OX=10090 GN=Afg3l1 PE=1 SV=2;sp|Q920A7-2|AFG31_MOUSE Isoform 2 of AFG3-like protein 1 OS=Mus musculus OX=10090 GN=Afg3l1	Q920A7;Q920A7-2	AFG3-like protein 1	Afg3l1	439	563	561	17258	12102	12126	10734	11791		455	685	512	20496	22585	21702	15355	22787	15424		high	20	20	39
	sp|Q8JZQ2|AFG32_MOUSE AFG3-like protein 2 OS=Mus musculus OX=10090 GN=Afg3l2 PE=1 SV=1	Q8JZQ2	AFG3-like protein 2	Afg3l2	8283	10862	9570	24507	33821	36778	36942	25638		7488	10927	8864	32487	49597	37939	33910	36634	30019		high	36	31	48
	sp|Q80WT5-2|AFTIN_MOUSE Isoform 2 of Aftiphilin OS=Mus musculus OX=10090 GN=Aftph;sp|Q80WT5|AFTIN_MOUSE Aftiphilin OS=Mus musculus OX=10090 GN=Aftph PE=1 SV=2	Q80WT5-2;Q80WT5	Aftiphilin	Aftph	92	670	586	10561	1562	1881	683	4596		743	381	156	1892	3714	5899	1783	5229	3136		high	20	20	34.8
	sp|Q64191|ASPG_MOUSE N(4)-(beta-N-acetylglucosaminyl)-L-asparaginase OS=Mus musculus OX=10090 GN=Aga PE=1 SV=1	Q64191	N(4)-(beta-N-acetylglucosaminyl)-L-asparaginase;Glycosylasparaginase alpha chain;Glycosylasparaginase beta chain	Aga	0	65	101	919	0	3053	1730	1145		0	149	168	4121	2369	1418	534	973	842		medium	5	5	24.3
	sp|Q3UHD9-2|AGAP2_MOUSE Isoform 2 of Arf-GAP with GTPase, ANK repeat and PH domain-containing protein 2 OS=Mus musculus OX=10090 GN=Agap2;sp|Q3UHD9|AGAP2_MOUSE Arf-GAP with GTPase, ANK repeat and PH domain-containing protein 2 OS=Mus musculus OX=10090 GN=A	Q3UHD9-2;Q3UHD9	Arf-GAP with GTPase, ANK repeat and PH domain-containing protein 2	Agap2	2529	3107	3690	4785	3940	3759	1889	7026		2606	4546	3723	6476	6893	7151	2884	4435	4261		high	27	26	34.6
	sp|Q8VHH5|AGAP3_MOUSE Arf-GAP with GTPase, ANK repeat and PH domain-containing protein 3 OS=Mus musculus OX=10090 GN=Agap3 PE=1 SV=1;sp|Q8VHH5-2|AGAP3_MOUSE Isoform 2 of Arf-GAP with GTPase, ANK repeat and PH domain-containing protein 3 OS=Mus musculus OX=	Q8VHH5;Q8VHH5-2	Arf-GAP with GTPase, ANK repeat and PH domain-containing protein 3	Agap3	66	336	378	1398	2230	2346	1325	6617		269	130	432	4031	2748	3578	3153	5305	2938		high	13	11	18.6
	sp|Q8K2K6-3|AGFG1_MOUSE Isoform 3 of Arf-GAP domain and FG repeat-containing protein 1 OS=Mus musculus OX=10090 GN=Agfg1;sp|Q8K2K6-1|AGFG1_MOUSE Isoform 1 of Arf-GAP domain and FG repeat-containing protein 1 OS=Mus musculus OX=10090 GN=Agfg1;sp|Q8K2K6|AGFG	Q8K2K6-3;Q8K2K6-1;Q8K2K6	Arf-GAP domain and FG repeat-containing protein 1	Agfg1	10837	12842	16872	154557	143994	157102	109034	154888		13755	19079	18768	172078	208983	206241	143447	261963	188066		low	17	3	40.8
	sp|Q8K2K6-2|AGFG1_MOUSE Isoform 2 of Arf-GAP domain and FG repeat-containing protein 1 OS=Mus musculus OX=10090 GN=Agfg1	Q8K2K6-2	Arf-GAP domain and FG repeat-containing protein 1	Agfg1	0	0	0	0	0	0	601	0		0	0	0	0	970	882	1005	1585	0		low	1	1	36.1
	sp|Q80WC7|AGFG2_MOUSE Arf-GAP domain and FG repeat-containing protein 2 OS=Mus musculus OX=10090 GN=Agfg2 PE=1 SV=1;sp|Q80WC7-2|AGFG2_MOUSE Isoform 2 of Arf-GAP domain and FG repeat-containing protein 2 OS=Mus musculus OX=10090 GN=Agfg2	Q80WC7;Q80WC7-2	Arf-GAP domain and FG repeat-containing protein 2	Agfg2	0	824	1245	11172	9752	9419	6035	7949		575	1206	1099	10954	10283	8773	6236	8833	5212		medium	7	7	27.8
	sp|Q7TN31|AGGF1_MOUSE Angiogenic factor with G patch and FHA domains 1 OS=Mus musculus OX=10090 GN=Aggf1 PE=2 SV=1	Q7TN31	Angiogenic factor with G patch and FHA domains 1	Aggf1	208	99	142	3435	2391	521	0	2150		291	124	128	1098	203	1328	1314	3002	1996		medium	6	6	11.7
	sp|Q9ESW4|AGK_MOUSE Acylglycerol kinase, mitochondrial OS=Mus musculus OX=10090 GN=Agk PE=1 SV=1	Q9ESW4;Q9ESW4-2	Acylglycerol kinase, mitochondrial	Agk	37072	46877	33991	78638	97618	101850	81594	100153		37162	48334	41798	121320	119973	105140	97351	83656	76572		high	24	24	68.9
	sp|Q8CJG1|AGO1_MOUSE Protein argonaute-1 OS=Mus musculus OX=10090 GN=Ago1 PE=1 SV=2	Q8CJG1	Protein argonaute-1	Ago1	5037	6741	5375	8916	8785	8362	5588	9266		5531	6753	8278	9738	6678	11322	5138	5940	6473		medium	30	21	62.3
	sp|Q8CJG0|AGO2_MOUSE Protein argonaute-2 OS=Mus musculus OX=10090 GN=Ago2 PE=1 SV=3	Q8CJG0	Protein argonaute-2	Ago2	26229	32012	33404	86653	70190	61660	73591	75442		32337	39209	38863	73189	65120	79770	73036	83635	61384		high	55	44	73.7
	sp|Q8CJF9|AGO3_MOUSE Protein argonaute-3 OS=Mus musculus OX=10090 GN=Ago3 PE=2 SV=2	Q8CJF9	Protein argonaute-3	Ago3	28	64	50	0	0	0	0	0		30	46	116	0	0	0	0	0	0		low	2	2	25
	sp|O35083|PLCA_MOUSE 1-acyl-sn-glycerol-3-phosphate acyltransferase alpha OS=Mus musculus OX=10090 GN=Agpat1 PE=1 SV=1	O35083	1-acyl-sn-glycerol-3-phosphate acyltransferase alpha	Agpat1	109	693	772	9234	8996	6885	7689	11668		513	507	572	6276	2976	18684	6053	0	5145		medium	5	5	26.7
	sp|Q8K3K7|PLCB_MOUSE 1-acyl-sn-glycerol-3-phosphate acyltransferase beta OS=Mus musculus OX=10090 GN=Agpat2 PE=1 SV=1	Q8K3K7	1-acyl-sn-glycerol-3-phosphate acyltransferase beta	Agpat2	325	161	404	948	1720	1486	2716	2482		695	854	667	2908	1704	2391	1921	1902	673		medium	3	3	16.5
	sp|Q9D517|PLCC_MOUSE 1-acyl-sn-glycerol-3-phosphate acyltransferase gamma OS=Mus musculus OX=10090 GN=Agpat3 PE=1 SV=2	Q9D517	1-acyl-sn-glycerol-3-phosphate acyltransferase gamma	Agpat3	4345	5557	4708	17371	8388	6299	5036	10063		6571	5746	7555	17597	13902	56499	11039	9108	12752		high	14	14	33
	sp|Q8K4X7|PLCD_MOUSE 1-acyl-sn-glycerol-3-phosphate acyltransferase delta OS=Mus musculus OX=10090 GN=Agpat4 PE=1 SV=1	Q8K4X7	1-acyl-sn-glycerol-3-phosphate acyltransferase delta	Agpat4	0	113	0	4556	3297	994	688	4387		280	1880	1379	15104	18263	33516	8085	15561	20538		high	10	10	28.8
	sp|Q9D1E8|PLCE_MOUSE 1-acyl-sn-glycerol-3-phosphate acyltransferase epsilon OS=Mus musculus OX=10090 GN=Agpat5 PE=1 SV=2	Q9D1E8	1-acyl-sn-glycerol-3-phosphate acyltransferase epsilon	Agpat5	350	579	95	9184	5471	11642	4333	9007		778	1695	1373	20453	18126	16538	19861	53177	25733		high	10	10	35.6
	sp|Q8K2C8|GPAT4_MOUSE Glycerol-3-phosphate acyltransferase 4 OS=Mus musculus OX=10090 GN=Gpat4 PE=1 SV=1	Q8K2C8	Glycerol-3-phosphate acyltransferase 4	Agpat6	147	337	296	5802	6040	3857	8398	6554		216	0	377	3228	7424	7066	4204	3749	9713		high	13	12	28.9
	sp|Q8C0I1|ADAS_MOUSE Alkyldihydroxyacetonephosphate synthase, peroxisomal OS=Mus musculus OX=10090 GN=Agps PE=1 SV=1	Q8C0I1	Alkyldihydroxyacetonephosphate synthase, peroxisomal	Agps	2253	2836	4040	63916	63868	49202	46322	50996		8081	4887	5634	89064	72375	79761	72451	66968	56627		high	30	30	61.4
	sp|Q9WVK0|ATRAP_MOUSE Type-1 angiotensin II receptor-associated protein OS=Mus musculus OX=10090 GN=Agtrap PE=1 SV=2	Q9WVK0	Type-1 angiotensin II receptor-associated protein	Agtrap	689	1256	1098	5147	6018	0	3211	5379		0	1126	2221	0	9183	0	0	0	3649		low	1	1	24.8
	sp|Q8CJF7|ELYS_MOUSE Protein ELYS OS=Mus musculus OX=10090 GN=Ahctf1 PE=1 SV=1	Q8CJF7	Protein ELYS	Ahctf1	2993	5579	4691	40973	31495	25058	24855	27222		4750	5796	4289	47589	44684	70873	29516	37102	26017		high	101	101	57.9
	sp|P50247|SAHH_MOUSE Adenosylhomocysteinase OS=Mus musculus OX=10090 GN=Ahcy PE=1 SV=3	P50247	Adenosylhomocysteinase	Ahcy	233559	259221	247804	1444743	1239767	947891	991296	968515		425176	434673	467787	1893371	1834453	2203049	1586767	1648260	1414246		high	36	36	77.1
	sp|Q80SW1|SAHH2_MOUSE S-adenosylhomocysteine hydrolase-like protein 1 OS=Mus musculus OX=10090 GN=Ahcyl1 PE=1 SV=1	Q80SW1	Putative adenosylhomocysteinase 2	Ahcyl1	1981	2716	2630	17446	5859	8841	14240	11179		2958	4686	4448	20350	24515	8558	11459	12017	7542		high	15	15	54.9
	sp|Q68FL4|SAHH3_MOUSE Putative adenosylhomocysteinase 3 OS=Mus musculus OX=10090 GN=Ahcyl2 PE=1 SV=1;sp|Q68FL4-2|SAHH3_MOUSE Isoform 2 of Putative adenosylhomocysteinase 3 OS=Mus musculus OX=10090 GN=Ahcyl2	Q68FL4;Q68FL4-2	Putative adenosylhomocysteinase 3	Ahcyl2	15060	14512	13336	138114	73639	89409	102668	123442		7687	19211	15996	76747	63530	106805	70698	64799	59803		medium	26	16	48.5
	sp|Q6PAL7|AHDC1_MOUSE AT-hook DNA-binding motif-containing protein 1 OS=Mus musculus OX=10090 GN=Ahdc1 PE=1 SV=1	Q6PAL7	AT-hook DNA-binding motif-containing protein 1	Ahdc1	104	253	318	0	0	0	143	96		32	338	496	109	330	0	170	199	124		high	15	15	13.6
	sp|Q8K3E5|AHI1_MOUSE Jouberin OS=Mus musculus OX=10090 GN=Ahi1 PE=1 SV=2;sp|Q8K3E5-2|AHI1_MOUSE Isoform 2 of Jouberin OS=Mus musculus OX=10090 GN=Ahi1	Q8K3E5;Q8K3E5-2	Jouberin	Ahi1	0	117	0	0	0	0	0	0		0	132	0	0	351	44	0	0	0		medium	4	4	6
	tr|E9Q616|E9Q616_MOUSE AHNAK nucleoprotein (desmoyokin) OS=Mus musculus OX=10090 GN=Ahnak PE=1 SV=1	E9Q616;A0A494BBD5;G5E8K8		Ahnak	68	89	105	4590	5897	534	2009	6658		783	1450	1151	7120	10742	6811	6492	15481	3843		high	123	123	51.4
	sp|Q8BK64|AHSA1_MOUSE Activator of 90 kDa heat shock protein ATPase homolog 1 OS=Mus musculus OX=10090 GN=Ahsa1 PE=1 SV=2	Q8BK64	Activator of 90 kDa heat shock protein ATPase homolog 1	Ahsa1	61961	52382	46244	857011	722801	671134	622589	673294		59971	83385	74742	1019423	1028079	792331	711466	1188931	721082		high	26	26	79.6
	sp|Q8N9S3|AHSA2_MOUSE Activator of 90 kDa heat shock protein ATPase homolog 2 OS=Mus musculus OX=10090 GN=Ahsa2 PE=1 SV=2;sp|Q8N9S3-2|AHSA2_MOUSE Isoform 2 of Activator of 90 kDa heat shock protein ATPase homolog 2 OS=Mus musculus OX=10090 GN=Ahsa2;sp|Q8N9	Q8N9S3;Q8N9S3-2;Q8N9S3-3	Activator of 90 kDa heat shock protein ATPase homolog 2	Ahsa2	521	971	494	29267	16400	10621	12607	23044		181	585	802	36589	29214	32162	15295	25838	8494		high	13	13	54.1
	sp|Q8C4Q6|AIDA_MOUSE Axin interactor, dorsalization-associated protein OS=Mus musculus OX=10090 GN=Aida PE=1 SV=1;sp|Q8C4Q6-2|AIDA_MOUSE Isoform 2 of Axin interactor, dorsalization-associated protein OS=Mus musculus OX=10090 GN=Aida	Q8C4Q6;Q8C4Q6-2	Axin interactor, dorsalization-associated protein	Aida	355	911	1348	1762	626	10556	5691	6801		2153	2587	2115	7662	11636	9477	6297	12327	6119		high	12	12	47.9
	sp|Q9Z0X1|AIFM1_MOUSE Apoptosis-inducing factor 1, mitochondrial OS=Mus musculus OX=10090 GN=Aifm1 PE=1 SV=1	Q9Z0X1;Q9Z0X1-2	Apoptosis-inducing factor 1, mitochondrial	Aifm1	13528	20901	16058	114683	108966	84517	149456	117543		14199	16984	15219	137913	138550	112537	121782	149766	97931		high	27	27	58.5
	tr|E9PVP1|E9PVP1_MOUSE Crystallin beta-gamma domain-containing 1 OS=Mus musculus OX=10090 GN=Crybg1 PE=1 SV=1;tr|A0A0G2JG52|A0A0G2JG52_MOUSE Crystallin beta-gamma domain-containing 1 OS=Mus musculus OX=10090 GN=Crybg1 PE=1 SV=1	E9PVP1;A0A0G2JG52		Aim1	268	191	205	11982	9819	5485	8641	9904		171	59	22	2423	7708	1788	2961	1877	469		high	35	34	32.7
	sp|Q91VJ1|AIM2_MOUSE Interferon-inducible protein AIM2 OS=Mus musculus OX=10090 GN=Aim2 PE=1 SV=2	Q91VJ1	Interferon-inducible protein AIM2	Aim2	419	104	412	4134	3279	1015	1626	0		1635	1378	2589	12284	12109	24766	6809	8851	1268		high	12	12	44.1
	sp|P31230|AIMP1_MOUSE Aminoacyl tRNA synthase complex-interacting multifunctional protein 1 OS=Mus musculus OX=10090 GN=Aimp1 PE=1 SV=2	P31230	Aminoacyl tRNA synthase complex-interacting multifunctional protein 1;Endothelial monocyte-activating polypeptide 2	Aimp1	7437	11625	20711	550230	612936	486462	483018	501890		17190	24644	17762	886593	912988	816036	695821	816159	655298		high	25	25	81.3
	sp|Q8R010|AIMP2_MOUSE Aminoacyl tRNA synthase complex-interacting multifunctional protein 2 OS=Mus musculus OX=10090 GN=Aimp2 PE=1 SV=2	Q8R010	Aminoacyl tRNA synthase complex-interacting multifunctional protein 2	Aimp2	1998	2186	4236	219394	157287	97441	73210	104489		5848	5323	4797	267836	251316	212626	129402	314494	87427		high	13	13	57.8
	sp|O08915|AIP_MOUSE AH receptor-interacting protein OS=Mus musculus OX=10090 GN=Aip PE=1 SV=1	O08915	AH receptor-interacting protein	Aip	7509	8943	14350	220554	117100	107149	71887	120551		14452	18688	17012	189710	171661	466972	90139	184886	133529		high	17	17	54.5
	sp|Q9WTP6-2|KAD2_MOUSE Isoform 2 of Adenylate kinase 2, mitochondrial OS=Mus musculus OX=10090 GN=Ak2;sp|Q9WTP6|KAD2_MOUSE Adenylate kinase 2, mitochondrial OS=Mus musculus OX=10090 GN=Ak2 PE=1 SV=5	Q9WTP6-2;Q9WTP6	Adenylate kinase 2, mitochondrial;Adenylate kinase 2, mitochondrial, N-terminally processed	Ak2	3715	5194	10765	548555	278117	255853	308487	279087		12192	10672	14514	550530	324060	533316	461567	425517	184366		high	19	19	72
	sp|Q9WTP7|KAD3_MOUSE GTP:AMP phosphotransferase AK3, mitochondrial OS=Mus musculus OX=10090 GN=Ak3 PE=1 SV=3	Q9WTP7	GTP:AMP phosphotransferase AK3, mitochondrial	Ak3	2471	2512	5348	36861	40332	41553	34955	48331		10891	9866	11983	69996	63179	81040	56962	57087	66966		high	16	16	76.2
	sp|Q9WUR9|KAD4_MOUSE Adenylate kinase 4, mitochondrial OS=Mus musculus OX=10090 GN=Ak4 PE=1 SV=1	Q9WUR9	Adenylate kinase 4, mitochondrial	Ak4	0	0	0	39740	21135	8579	8045	24746		0	0	0	10736	25309	3009	18243	5855	669		medium	7	7	46.2
	sp|Q8VCP8|KAD6_MOUSE Adenylate kinase isoenzyme 6 OS=Mus musculus OX=10090 GN=Ak6 PE=1 SV=1	Q8VCP8	Adenylate kinase isoenzyme 6	Ak6	0	0	0	24267	10182	9832	0	7385		0	0	0	37789	25790	18614	32958	15949	7204		medium	3	3	27.3
	sp|O08715|AKAP1_MOUSE A-kinase anchor protein 1, mitochondrial OS=Mus musculus OX=10090 GN=Akap1 PE=1 SV=4;sp|O08715-4|AKAP1_MOUSE Isoform 4 of A-kinase anchor protein 1, mitochondrial OS=Mus musculus OX=10090 GN=Akap1;sp|O08715-6|AKAP1_MOUSE Isoform 6 of	O08715;O08715-4;O08715-6;O08715-2;O08715-5;O08715-3	A-kinase anchor protein 1, mitochondrial	Akap1	0	0	0	10607	5137	4421	2907	3465		0	0	0	6947	14258	29359	5166	9020	4023		high	17	17	27.7
	sp|O88845|AKA10_MOUSE A-kinase anchor protein 10, mitochondrial OS=Mus musculus OX=10090 GN=Akap10 PE=1 SV=3;sp|O88845-2|AKA10_MOUSE Isoform 2 of A-kinase anchor protein 10, mitochondrial OS=Mus musculus OX=10090 GN=Akap10;sp|O88845-3|AKA10_MOUSE Isoform 3	O88845;O88845-2;O88845-3	A-kinase anchor protein 10, mitochondrial	Akap10	59	79	218	1583	1445	2481	1747	2595		77	291	151	2956	1736	4134	1587	3528	2681		high	12	12	28.5
	tr|E9Q777|E9Q777_MOUSE A kinase (PRKA) anchor protein 11 OS=Mus musculus OX=10090 GN=Akap11 PE=1 SV=2;tr|E9Q774|E9Q774_MOUSE A kinase (PRKA) anchor protein 11 OS=Mus musculus OX=10090 GN=Akap11 PE=1 SV=2	E9Q777;E9Q774		Akap11	662	692	964	3385	1775	1649	1297	1344		555	703	447	2661	1984	2813	1224	1654	402		high	32	32	23.2
	sp|Q9WTQ5-2|AKA12_MOUSE Isoform 2 of A-kinase anchor protein 12 OS=Mus musculus OX=10090 GN=Akap12;sp|Q9WTQ5|AKA12_MOUSE A-kinase anchor protein 12 OS=Mus musculus OX=10090 GN=Akap12 PE=1 SV=1	Q9WTQ5-2;Q9WTQ5	A-kinase anchor protein 12	Akap12	27	536	66	0	0	0	0	0		0	0	77	0	0	0	0	0	0		medium	5	5	4.8
	sp|E9Q394-2|AKP13_MOUSE Isoform 2 of A-kinase anchor protein 13 OS=Mus musculus OX=10090 GN=Akap13;sp|E9Q394|AKP13_MOUSE A-kinase anchor protein 13 OS=Mus musculus OX=10090 GN=Akap13 PE=1 SV=1	E9Q394-2;E9Q394		Akap13	4745	6123	5364	9853	6930	5369	7618	7996		5227	8021	7412	6323	6398	5814	6114	6164	3410		high	106	106	54.8
	sp|O54931-3|AKAP2_MOUSE Isoform 3 of A-kinase anchor protein 2 OS=Mus musculus OX=10090 GN=Akap2;sp|O54931-2|AKAP2_MOUSE Isoform 2 of A-kinase anchor protein 2 OS=Mus musculus OX=10090 GN=Akap2;sp|O54931|AKAP2_MOUSE A-kinase anchor protein 2 OS=Mus musculu	O54931-3;O54931-2;O54931;O54931-5;O54931-4	A-kinase anchor protein 2	Akap2	65	94	0	0	205	0	0	0		1720	1845	2918	1230	2584	1245	0	318	0		high	17	17	29.6
	sp|Q60662-2|AKAP4_MOUSE Isoform 2 of A-kinase anchor protein 4 OS=Mus musculus OX=10090 GN=Akap4;sp|Q60662|AKAP4_MOUSE A-kinase anchor protein 4 OS=Mus musculus OX=10090 GN=Akap4 PE=1 SV=1	Q60662-2;Q60662	A-kinase anchor protein 4	Akap4	0	0	0	0	0	0	176	626		0	793	0	0	0	0	0	199	0		medium	4	4	6.3
	sp|Q9DBR0|AKAP8_MOUSE A-kinase anchor protein 8 OS=Mus musculus OX=10090 GN=Akap8 PE=1 SV=1	Q9DBR0	A-kinase anchor protein 8	Akap8	19100	20484	20670	161541	75191	69955	74487	73027		21510	29281	26559	135733	162653	107895	95631	151684	102544		high	33	33	56.9
	sp|Q9R0L7|AKP8L_MOUSE A-kinase anchor protein 8-like OS=Mus musculus OX=10090 GN=Akap8l PE=1 SV=1	Q9R0L7	A-kinase anchor protein 8-like	Akap8l	4302	4625	5267	3868	4439	4792	6288	9640		6517	7746	9184	6743	8135	6723	6985	9187	5202		high	17	17	33
	sp|Q70FJ1-3|AKAP9_MOUSE Isoform 3 of A-kinase anchor protein 9 OS=Mus musculus OX=10090 GN=Akap9;sp|Q70FJ1-2|AKAP9_MOUSE Isoform 2 of A-kinase anchor protein 9 OS=Mus musculus OX=10090 GN=Akap9;sp|Q70FJ1|AKAP9_MOUSE A-kinase anchor protein 9 OS=Mus musculu	Q70FJ1-3;Q70FJ1-2;Q70FJ1	A-kinase anchor protein 9	Akap9	24	151	115	2519	2606	3738	1233	1436		42	154	154	1528	2038	1332	1515	1554	1055		high	71	71	24.6
	sp|Q80VW7|AKNA_MOUSE Microtubule organization protein AKNA OS=Mus musculus OX=10090 GN=Akna PE=1 SV=1;sp|Q80VW7-3|AKNA_MOUSE Isoform 3 of Microtubule organization protein AKNA OS=Mus musculus OX=10090 GN=Akna;sp|Q80VW7-4|AKNA_MOUSE Isoform 4 of Microtubule	Q80VW7;Q80VW7-3;Q80VW7-4;Q80VW7-2	AT-hook-containing transcription factor	Akna	374	951	645	1467	3032	2043	948	2619		928	899	630	1201	1520	1422	1235	1900	1154		high	30	30	38
	sp|Q9JII6|AK1A1_MOUSE Aldo-keto reductase family 1 member A1 OS=Mus musculus OX=10090 GN=Akr1a1 PE=1 SV=3	Q9JII6	Alcohol dehydrogenase [NADP(+)]	Akr1a1	16026	21181	32826	144555	116503	95239	119133	137987		26087	48852	41770	128807	129030	116872	102701	147547	106806		high	22	22	75.4
	sp|P45376|ALDR_MOUSE Aldo-keto reductase family 1 member B1 OS=Mus musculus OX=10090 GN=Akr1b1 PE=1 SV=3	P45376	Aldose reductase	Akr1b1	91647	174517	324101	2354487	1963538	1701652	1657662	1679032		254994	396535	355579	2276868	2280881	2564250	2194473	2358585	1287264		high	30	30	78.5
	tr|G5E895|G5E895_MOUSE Aldo-keto reductase family 1, member B10 (aldose reductase) OS=Mus musculus OX=10090 GN=Akr1b10 PE=1 SV=1;tr|D3Z494|D3Z494_MOUSE Aldo-keto reductase family 1, member B10 (aldose reductase) OS=Mus musculus OX=10090 GN=Akr1b10 PE=1 SV=	G5E895;D3Z494;S4R2G9;P45377;P21300		Akr1b10	41124	47753	8661	0	0	1835	4555	5576		35280	2470	55459	11452	2385	6629	9093	3383	1311		high	13	13	48.7
	sp|Q8VC28|AK1CD_MOUSE Aldo-keto reductase family 1 member C13 OS=Mus musculus OX=10090 GN=Akr1c13 PE=1 SV=2	Q8VC28	Aldo-keto reductase family 1 member C13	Akr1c13	1489	4115	7364	30354	10506	11589	56258	97332		4845	2827	4125	27441	14522	17424	17958	35967	12998		high	20	20	74.9
	sp|Q8K023|AKC1H_MOUSE Aldo-keto reductase family 1 member C18 OS=Mus musculus OX=10090 GN=Akr1c18 PE=1 SV=2;sp|Q8K023-2|AKC1H_MOUSE Isoform 2 of Aldo-keto reductase family 1 member C18 OS=Mus musculus OX=10090 GN=Akr1c18	Q8K023;Q8K023-2	Aldo-keto reductase family 1 member C18	Akr1c18	0	0	159	3015	1204	0	16033	21234		0	0	0	6724	0	0	0	0	0		high	12	10	41.8
	sp|Q9DCT1|AKCL2_MOUSE 1,5-anhydro-D-fructose reductase OS=Mus musculus OX=10090 GN=Akr1e2 PE=1 SV=1	Q9DCT1	1,5-anhydro-D-fructose reductase	Akr1e2	0	0	0	11601	5567	7432	12805	7055		0	0	1578	13409	6493	7693	18338	10978	9758		medium	7	7	30.6
	sp|Q8CG76|ARK72_MOUSE Aflatoxin B1 aldehyde reductase member 2 OS=Mus musculus OX=10090 GN=Akr7a2 PE=1 SV=3	Q8CG76	Aflatoxin B1 aldehyde reductase member 2	Akr7a2	3176	4146	3755	40560	36177	32363	34463	46952		4636	5950	6501	25589	26993	25404	31847	32423	25312		high	14	14	52.9
	sp|P31750|AKT1_MOUSE RAC-alpha serine/threonine-protein kinase OS=Mus musculus OX=10090 GN=Akt1 PE=1 SV=2	P31750	RAC-alpha serine/threonine-protein kinase	Akt1	2833	2061	2719	22541	25301	24573	18067	19083		1056	3687	5068	23167	24096	43305	21013	24913	17944		high	22	17	53.1
	sp|Q9D1F4|AKTS1_MOUSE Proline-rich AKT1 substrate 1 OS=Mus musculus OX=10090 GN=Akt1s1 PE=1 SV=1	Q9D1F4	Proline-rich AKT1 substrate 1	Akt1s1	115	552	0	1147	1222	457	1868	1443		167	145	132	1361	1759	2484	1530	783	365		medium	4	4	20.6
	sp|Q60823|AKT2_MOUSE RAC-beta serine/threonine-protein kinase OS=Mus musculus OX=10090 GN=Akt2 PE=1 SV=1	Q60823	RAC-beta serine/threonine-protein kinase	Akt2	3061	5471	5188	14916	8466	19200	15116	19194		5276	6664	7744	20379	14731	27655	21074	20754	19268		high	17	17	54.5
	sp|Q64362|AKTIP_MOUSE AKT-interacting protein OS=Mus musculus OX=10090 GN=Aktip PE=1 SV=1	Q64362	AKT-interacting protein	Aktip	87	0	0	0	3201	2266	1456	1836		0	0	0	0	0	1632	0	1906	2020		medium	4	4	20.5
	sp|P10518|HEM2_MOUSE Delta-aminolevulinic acid dehydratase OS=Mus musculus OX=10090 GN=Alad PE=1 SV=1	P10518	Delta-aminolevulinic acid dehydratase	Alad	117	1300	1536	42928	68270	49107	22607	42811		3076	3438	3999	104312	97258	106664	57279	96323	78740		high	15	15	50.6
	sp|Q8VC19|HEM1_MOUSE 5-aminolevulinate synthase, nonspecific, mitochondrial OS=Mus musculus OX=10090 GN=Alas1 PE=1 SV=2	Q8VC19	5-aminolevulinate synthase, nonspecific, mitochondrial	Alas1	0	0	0	3446	4759	1874	2040	1280		0	0	0	4667	3855	925	3085	3026	0		high	8	8	18.8
	sp|P07724|ALBU_MOUSE Albumin OS=Mus musculus OX=10090 GN=Alb PE=1 SV=3	P07724	Serum albumin	Alb	8947	15235	24211	2439	2471	375	432	2274		13204	20956	17485	1824	187	0	216	658	256		high	31	29	66.3
	sp|Q61490|CD166_MOUSE CD166 antigen OS=Mus musculus OX=10090 GN=Alcam PE=1 SV=3	Q61490	CD166 antigen	Alcam	0	457	0	1422	1286	627	1868	2510		0	0	0	8545	8784	8648	9253	14797	6613		high	12	12	24.5
	sp|Q571I9|A16A1_MOUSE Aldehyde dehydrogenase family 16 member A1 OS=Mus musculus OX=10090 GN=Aldh16a1 PE=1 SV=2	Q571I9	Aldehyde dehydrogenase family 16 member A1	Aldh16a1	708	1341	1100	13766	9722	13054	6807	10480		909	1748	1869	17542	18235	21574	13494	23447	13086		high	13	13	21.8
	sp|Q9Z110|P5CS_MOUSE Delta-1-pyrroline-5-carboxylate synthase OS=Mus musculus OX=10090 GN=Aldh18a1 PE=1 SV=2	Q9Z110	Delta-1-pyrroline-5-carboxylate synthase;Glutamate 5-kinase;Gamma-glutamyl phosphate reductase	Aldh18a1	15667	18867	19152	211760	212984	167515	131421	147510		26445	23115	27102	315876	254458	315947	200270	235821	185119		low	51	1	67.9
	sp|Q9CZS1|AL1B1_MOUSE Aldehyde dehydrogenase X, mitochondrial OS=Mus musculus OX=10090 GN=Aldh1b1 PE=1 SV=1	Q9CZS1	Aldehyde dehydrogenase X, mitochondrial	Aldh1b1	1370	2586	2253	8106	6039	3573	6712	5288		2751	4225	5401	6326	8378	5229	7308	8928	6643		high	19	18	55.5
	sp|Q8R0Y6|AL1L1_MOUSE Cytosolic 10-formyltetrahydrofolate dehydrogenase OS=Mus musculus OX=10090 GN=Aldh1l1 PE=1 SV=1	Q8R0Y6	Cytosolic 10-formyltetrahydrofolate dehydrogenase	Aldh1l1	68	86	93	0	0	0	0	1282		37	0	0	0	0	0	0	0	0		medium	5	5	8.8
	sp|P47738|ALDH2_MOUSE Aldehyde dehydrogenase, mitochondrial OS=Mus musculus OX=10090 GN=Aldh2 PE=1 SV=1	P47738	Aldehyde dehydrogenase, mitochondrial	Aldh2	7317	11939	11548	34393	40233	44712	51176	62864		907	686	937	4421	12110	4356	4382	12782	4575		high	25	24	52.4
	sp|P47740|AL3A2_MOUSE Aldehyde dehydrogenase family 3 member A2 OS=Mus musculus OX=10090 GN=Aldh3a2 PE=1 SV=2	P47740;P47739	Fatty aldehyde dehydrogenase	Aldh3a2	6286	4563	7245	10105	11616	13543	13283	16241		8701	7913	6226	14300	6931	19222	8689	6449	12384		high	17	17	36.8
	sp|Q8CHT0|AL4A1_MOUSE Delta-1-pyrroline-5-carboxylate dehydrogenase, mitochondrial OS=Mus musculus OX=10090 GN=Aldh4a1 PE=1 SV=3	Q8CHT0	Delta-1-pyrroline-5-carboxylate dehydrogenase, mitochondrial	Aldh4a1	7752	13524	10126	25856	12689	13803	25530	15996		12825	12545	14496	17405	18050	11397	12180	18371	8058		high	22	22	57.7
	sp|Q8BWF0|SSDH_MOUSE Succinate-semialdehyde dehydrogenase, mitochondrial OS=Mus musculus OX=10090 GN=Aldh5a1 PE=1 SV=1	Q8BWF0	Succinate-semialdehyde dehydrogenase, mitochondrial	Aldh5a1	0	0	0	854	693	0	0	0		0	0	0	0	0	0	0	0	0		low	2	2	5.2
	sp|Q9EQ20|MMSA_MOUSE Methylmalonate-semialdehyde dehydrogenase [acylating], mitochondrial OS=Mus musculus OX=10090 GN=Aldh6a1 PE=1 SV=1	Q9EQ20	Methylmalonate-semialdehyde dehydrogenase [acylating], mitochondrial	Aldh6a1	1191	2335	3726	5224	4287	5173	6408	8187		3421	3913	2614	4045	2169	3897	3500	2639	4055		high	20	20	51.4
	sp|Q9DBF1-2|AL7A1_MOUSE Isoform 2 of Alpha-aminoadipic semialdehyde dehydrogenase OS=Mus musculus OX=10090 GN=Aldh7a1;sp|Q9DBF1|AL7A1_MOUSE Alpha-aminoadipic semialdehyde dehydrogenase OS=Mus musculus OX=10090 GN=Aldh7a1 PE=1 SV=4	Q9DBF1-2;Q9DBF1	Alpha-aminoadipic semialdehyde dehydrogenase	Aldh7a1	808	1020	953	5450	5455	5802	5379	7773		477	719	751	7697	3514	9464	5674	7370	4782		high	14	14	45.2
	sp|Q9JLJ2|AL9A1_MOUSE 4-trimethylaminobutyraldehyde dehydrogenase OS=Mus musculus OX=10090 GN=Aldh9a1 PE=1 SV=1	Q9JLJ2	4-trimethylaminobutyraldehyde dehydrogenase	Aldh9a1	24726	43181	43416	276442	210749	212496	208803	252543		39089	58378	51703	267309	283146	269023	206037	271354	177522		high	30	30	65.8
	sp|P05064|ALDOA_MOUSE Fructose-bisphosphate aldolase A OS=Mus musculus OX=10090 GN=Aldoa PE=1 SV=2	P05064	Fructose-bisphosphate aldolase A	Aldoa	220115	284224	455737	9312865	7394715	4115975	5444055	6573072		424581	510425	395852	9132996	10775420	7158586	6534377	9465228	4733775		high	40	33	94.5
	sp|Q91Y97|ALDOB_MOUSE Fructose-bisphosphate aldolase B OS=Mus musculus OX=10090 GN=Aldob PE=1 SV=3	Q91Y97	Fructose-bisphosphate aldolase B	Aldob	3539	4682	10254	167046	199301	114669	99310	110114		7817	11337	9917	115525	171982	120000	143159	128883	76658		low	2	2	8
	sp|P05063|ALDOC_MOUSE Fructose-bisphosphate aldolase C OS=Mus musculus OX=10090 GN=Aldoc PE=1 SV=4	P05063	Fructose-bisphosphate aldolase C	Aldoc	0	0	87	11522	13552	2425	5604	7974		0	0	0	2043	5945	0	0	1333	0		medium	7	7	45.7
	sp|Q921Q3-2|ALG1_MOUSE Isoform 2 of Chitobiosyldiphosphodolichol beta-mannosyltransferase OS=Mus musculus OX=10090 GN=Alg1;sp|Q921Q3|ALG1_MOUSE Chitobiosyldiphosphodolichol beta-mannosyltransferase OS=Mus musculus OX=10090 GN=Alg1 PE=1 SV=3	Q921Q3-2;Q921Q3	Chitobiosyldiphosphodolichol beta-mannosyltransferase	Alg1	203	287	282	1671	7716	3493	5543	5765		144	235	259	8895	3900	6819	3558	4251	1087		medium	4	4	15.4
	sp|Q3UGP8|AG10B_MOUSE Putative Dol-P-Glc:Glc(2)Man(9)GlcNAc(2)-PP-Dol alpha-1,2-glucosyltransferase OS=Mus musculus OX=10090 GN=Alg10b PE=1 SV=1	Q3UGP8	Putative Dol-P-Glc:Glc(2)Man(9)GlcNAc(2)-PP-Dol alpha-1,2-glucosyltransferase	Alg10b	703	934	642	0	4261	5124	2139	1184		1237	1665	1119	0	0	2734	425	5229	2586		medium	6	6	12
	sp|Q3TZM9|ALG11_MOUSE GDP-Man:Man(3)GlcNAc(2)-PP-Dol alpha-1,2-mannosyltransferase OS=Mus musculus OX=10090 GN=Alg11 PE=2 SV=1;sp|Q3TZM9-2|ALG11_MOUSE Isoform 2 of GDP-Man:Man(3)GlcNAc(2)-PP-Dol alpha-1,2-mannosyltransferase OS=Mus musculus OX=10090 GN=Alg	Q3TZM9;Q3TZM9-2;Q3TZM9-3	GDP-Man:Man(3)GlcNAc(2)-PP-Dol alpha-1,2-mannosyltransferase	Alg11	112	122	185	3845	1390	4399	3016	4148		0	363	681	2807	2867	2677	3111	3849	2902		high	10	10	27
	sp|Q8VDB2|ALG12_MOUSE Dol-P-Man:Man(7)GlcNAc(2)-PP-Dol alpha-1,6-mannosyltransferase OS=Mus musculus OX=10090 GN=Alg12 PE=2 SV=2	Q8VDB2	Dol-P-Man:Man(7)GlcNAc(2)-PP-Dol alpha-1,6-mannosyltransferase	Alg12	0	456	83	1162	1029	917	1190	422		384	703	660	353	1621	1854	2149	673	520		medium	5	5	14.6
	sp|Q9D081|ALG14_MOUSE UDP-N-acetylglucosamine transferase subunit ALG14 homolog OS=Mus musculus OX=10090 GN=Alg14 PE=1 SV=1	Q9D081	UDP-N-acetylglucosamine transferase subunit ALG14 homolog	Alg14	441	121	362	0	0	455	0	0		376	0	98	698	0	855	0	0	0		medium	5	5	28.6
	sp|Q9DBE8|ALG2_MOUSE Alpha-1,3/1,6-mannosyltransferase ALG2 OS=Mus musculus OX=10090 GN=Alg2 PE=1 SV=2	Q9DBE8	Alpha-1,3/1,6-mannosyltransferase ALG2	Alg2	2084	1717	3294	31980	28829	28982	34492	38874		1982	337	1487	26434	18881	21762	30653	10875	24604		high	20	20	60.2
	sp|Q8K2A8|ALG3_MOUSE Dol-P-Man:Man(5)GlcNAc(2)-PP-Dol alpha-1,3-mannosyltransferase OS=Mus musculus OX=10090 GN=Alg3 PE=1 SV=2	Q8K2A8	Dol-P-Man:Man(5)GlcNAc(2)-PP-Dol alpha-1,3-mannosyltransferase	Alg3	242	186	195	615	945	379	0	1028		875	327	465	2999	5308	5392	1924	3338	1721		medium	4	4	8
	sp|Q9DB25|ALG5_MOUSE Dolichyl-phosphate beta-glucosyltransferase OS=Mus musculus OX=10090 GN=Alg5 PE=1 SV=1	Q9DB25	Dolichyl-phosphate beta-glucosyltransferase	Alg5	6747	3845	5109	59301	78165	48332	63356	46621		17387	12442	17464	55454	49788	50497	63275	41150	73777		high	12	12	42.9
	sp|Q6P8H8|ALG8_MOUSE Probable dolichyl pyrophosphate Glc1Man9GlcNAc2 alpha-1,3-glucosyltransferase OS=Mus musculus OX=10090 GN=Alg8 PE=2 SV=2	Q6P8H8	Probable dolichyl pyrophosphate Glc1Man9GlcNAc2 alpha-1,3-glucosyltransferase	Alg8	0	0	0	421	0	3237	545	527		0	0	0	911	0	980	2300	1696	2623		medium	4	4	9.1
	sp|Q8VDI9|ALG9_MOUSE Alpha-1,2-mannosyltransferase ALG9 OS=Mus musculus OX=10090 GN=Alg9 PE=2 SV=1	Q8VDI9	Alpha-1,2-mannosyltransferase ALG9	Alg9	0	0	0	1005	1051	652	5031	1494		76	0	159	2261	2194	923	244	2140	0		medium	5	5	13.4
	sp|P0CB42|ALKB1_MOUSE Nucleic acid dioxygenase ALKBH1 OS=Mus musculus OX=10090 GN=Alkbh1 PE=1 SV=1	P0CB42	Alkylated DNA repair protein alkB homolog 1	Alkbh1	0	0	93	1491	1423	2267	1007	1317		0	0	117	3223	2716	0	1649	2352	2440		medium	4	4	15.9
	sp|Q6P6J4|ALKB2_MOUSE DNA oxidative demethylase ALKBH2 OS=Mus musculus OX=10090 GN=Alkbh2 PE=1 SV=1	Q6P6J4	Alpha-ketoglutarate-dependent dioxygenase alkB homolog 2	Alkbh2	73	0	0	0	2387	1970	982	2046		0	0	0	1496	3136	3723	0	2872	0		low	2	2	14.2
	sp|Q8K1E6|ALKB3_MOUSE Alpha-ketoglutarate-dependent dioxygenase alkB homolog 3 OS=Mus musculus OX=10090 GN=Alkbh3 PE=1 SV=1	Q8K1E6	Alpha-ketoglutarate-dependent dioxygenase alkB homolog 3	Alkbh3	1003	581	1167	10958	10874	8685	7177	7047		2537	1765	2932	13076	14327	12022	11952	14166	9136		high	13	13	66.8
	sp|Q9D8F1|ALKB4_MOUSE Alpha-ketoglutarate-dependent dioxygenase alkB homolog 4 OS=Mus musculus OX=10090 GN=Alkbh4 PE=1 SV=1;sp|Q9D8F1-2|ALKB4_MOUSE Isoform 2 of Alpha-ketoglutarate-dependent dioxygenase alkB homolog 4 OS=Mus musculus OX=10090 GN=Alkbh4	Q9D8F1;Q9D8F1-2	Alpha-ketoglutarate-dependent dioxygenase alkB homolog 4	Alkbh4	0	0	0	1002	0	2110	2614	2335		0	0	0	3013	3809	3597	4807	1518	3437		medium	4	4	22.3
	sp|Q3TSG4|ALKB5_MOUSE RNA demethylase ALKBH5 OS=Mus musculus OX=10090 GN=Alkbh5 PE=1 SV=2	Q3TSG4	RNA demethylase ALKBH5	Alkbh5	3540	3016	4125	49378	40386	41946	34221	50318		5577	6038	6288	32903	34963	29133	47928	65494	38435		high	19	19	48.6
	sp|Q8K2U2|ALKB6_MOUSE Alpha-ketoglutarate-dependent dioxygenase alkB homolog 6 OS=Mus musculus OX=10090 GN=Alkbh6 PE=2 SV=3	Q8K2U2	Alpha-ketoglutarate-dependent dioxygenase alkB homolog 6	Alkbh6	73	74	0	1818	2176	2361	585	1443		0	0	0	3252	1563	2013	1420	2691	2891		medium	4	4	23.9
	sp|Q9D6Z0|ALKB7_MOUSE Alpha-ketoglutarate-dependent dioxygenase alkB homolog 7, mitochondrial OS=Mus musculus OX=10090 GN=Alkbh7 PE=1 SV=1	Q9D6Z0;Q9D6Z0-2	Alpha-ketoglutarate-dependent dioxygenase alkB homolog 7, mitochondrial	Alkbh7	265	360	283	9538	9972	8341	5480	7530		366	346	0	11247	6311	2729	2544	4252	6421		medium	3	3	25.8
	sp|Q80Y20|ALKB8_MOUSE Alkylated DNA repair protein alkB homolog 8 OS=Mus musculus OX=10090 GN=Alkbh8 PE=1 SV=1;sp|Q80Y20-2|ALKB8_MOUSE Isoform 2 of Alkylated DNA repair protein alkB homolog 8 OS=Mus musculus OX=10090 GN=Alkbh8	Q80Y20;Q80Y20-2;Q80Y20-3	Alkylated DNA repair protein alkB homolog 8	Alkbh8	386	312	112	7273	4744	631	2684	3021		452	500	484	7830	6307	3761	6339	10845	5016		high	18	18	40.5
	sp|Q8K4E0|ALMS1_MOUSE Alstrom syndrome protein 1 homolog OS=Mus musculus OX=10090 GN=Alms1 PE=1 SV=2	Q8K4E0	Alstrom syndrome protein 1 homolog	Alms1	0	0	0	0	0	156	44	16		0	0	0	80	98	484	93	193	64		high	11	11	5.7
	sp|P39654|LOX15_MOUSE Polyunsaturated fatty acid lipoxygenase ALOX15 OS=Mus musculus OX=10090 GN=Alox15 PE=1 SV=4	P39654	Arachidonate 15-lipoxygenase	Alox15	212	181	0	0	0	0	0	0		627	0	229	0	0	0	0	0	0		low	1	1	1.5
	sp|P09242|PPBT_MOUSE Alkaline phosphatase, tissue-nonspecific isozyme OS=Mus musculus OX=10090 GN=Alpl PE=1 SV=2	P09242	Alkaline phosphatase, tissue-nonspecific isozyme	Alpl	0	0	0	1121	712	2326	1539	634		0	0	0	4216	3731	3750	557	2513	1066		medium	6	6	15.3
	sp|Q920R0|ALS2_MOUSE Alsin OS=Mus musculus OX=10090 GN=Als2 PE=1 SV=3;sp|Q920R0-2|ALS2_MOUSE Isoform 2 of Alsin OS=Mus musculus OX=10090 GN=Als2	Q920R0;Q920R0-2	Alsin	Als2	450	25	41	0	0	128	80	0		75	0	39	109	0	0	0	111	108		high	10	10	8.5
	sp|Q60I26|AL2CL_MOUSE ALS2 C-terminal-like protein OS=Mus musculus OX=10090 GN=Als2cl PE=1 SV=1;sp|Q60I26-2|AL2CL_MOUSE Isoform 2 of ALS2 C-terminal-like protein OS=Mus musculus OX=10090 GN=Als2cl	Q60I26;Q60I26-2;Q60I26-3	ALS2 C-terminal-like protein	Als2cl	1150	1801	1063	1433	1193	1288	1080	1143		1231	769	1026	416	598	1050	1008	477	501		high	23	23	29.5
	sp|O08583|THOC4_MOUSE THO complex subunit 4 OS=Mus musculus OX=10090 GN=Alyref PE=1 SV=3;sp|O08583-2|THOC4_MOUSE Isoform 2 of THO complex subunit 4 OS=Mus musculus OX=10090 GN=Alyref	O08583;O08583-2;Q9JJW6-2	THO complex subunit 4	Alyref	36477	56254	108855	735934	685972	851594	832276	1020115		70084	121225	124926	1008381	824787	1200752	912903	673380	808329		high	13	10	44.3
	sp|Q9JJW6|ALRF2_MOUSE Aly/REF export factor 2 OS=Mus musculus OX=10090 GN=Alyref2 PE=1 SV=1	Q9JJW6	Aly/REF export factor 2	Alyref2	0	89	153	0	0	0	0	0		284	339	201	0	0	0	0	0	0		low	1	1	19.7
	sp|O09174|AMACR_MOUSE Alpha-methylacyl-CoA racemase OS=Mus musculus OX=10090 GN=Amacr PE=1 SV=4	O09174	Alpha-methylacyl-CoA racemase	Amacr	437	519	335	2967	2414	3235	4033	3698		1186	1011	809	1068	774	2753	1767	0	1445		high	9	9	31.8
	sp|A2AH22-2|AMRA1_MOUSE Isoform 2 of Activating molecule in BECN1-regulated autophagy protein 1 OS=Mus musculus OX=10090 GN=Ambra1;sp|A2AH22|AMRA1_MOUSE Activating molecule in BECN1-regulated autophagy protein 1 OS=Mus musculus OX=10090 GN=Ambra1 PE=1 SV=1	A2AH22-2;A2AH22;A2AH22-7;A2AH22-6;A2AH22-5;A2AH22-3;A2AH22-4	Activating molecule in BECN1-regulated autophagy protein 1	Ambra1	0	48	110	935	960	209	256	1255		16	81	67	3092	7508	2306	1372	1355	456		high	21	21	26.5
	sp|P0DMN7|DCAM1_MOUSE S-adenosylmethionine decarboxylase proenzyme 1 OS=Mus musculus OX=10090 GN=Amd1 PE=1 SV=1;sp|D3Z6H8|DCAM2_MOUSE S-adenosylmethionine decarboxylase proenzyme 2 OS=Mus musculus OX=10090 GN=Amd2 PE=1 SV=1	P0DMN7;D3Z6H8	S-adenosylmethionine decarboxylase proenzyme 1;S-adenosylmethionine decarboxylase 1 alpha chain;S-adenosylmethionine decarboxylase 1 beta chain;S-adenosylmethionine decarboxylase proenzyme 2;S-adenosylmethionine decarboxylase 2 alpha chain;S-adenosylmethionine decarboxylase 2 beta chain	Amd1;Amd2	0	0	0	3678	11557	7336	1850	4067		0	0	0	13194	9559	12228	12320	10737	5925		high	9	9	34.1
	sp|Q8JZV7|NAGA_MOUSE N-acetylglucosamine-6-phosphate deacetylase OS=Mus musculus OX=10090 GN=Amdhd2 PE=1 SV=1	Q8JZV7	Putative N-acetylglucosamine-6-phosphate deacetylase	Amdhd2	4058	4179	3570	11666	13505	9610	11059	11149		5652	1519	3866	10107	8704	8929	9193	5101	1270		high	11	11	42.8
	sp|Q9R049-2|AMFR_MOUSE Isoform 2 of E3 ubiquitin-protein ligase AMFR OS=Mus musculus OX=10090 GN=Amfr;sp|Q9R049|AMFR_MOUSE E3 ubiquitin-protein ligase AMFR OS=Mus musculus OX=10090 GN=Amfr PE=1 SV=2	Q9R049-2;Q9R049	E3 ubiquitin-protein ligase AMFR	Amfr	518	1123	326	19810	9097	11338	5360	9159		319	786	856	22274	22795	21875	7677	10224	10561		high	16	16	35.5
	sp|Q80UL9|JAML_MOUSE Junctional adhesion molecule-like OS=Mus musculus OX=10090 GN=Jaml PE=1 SV=2	Q80UL9	Junctional adhesion molecule-like	Amica1	0	0	0	0	0	0	326	0		0	0	0	3810	3132	3080	2392	879	635		medium	6	6	21.6
	sp|Q9JHT5|AMMR1_MOUSE AMME syndrome candidate gene 1 protein homolog OS=Mus musculus OX=10090 GN=Ammecr1 PE=2 SV=1	Q9JHT5	AMME syndrome candidate gene 1 protein homolog	Ammecr1	0	0	0	97572	0	1290	679	559		0	0	0	4640	1057	5046	0	6124	1294		medium	6	6	24.4
	sp|Q8JZZ6|AMERL_MOUSE AMMECR1-like protein OS=Mus musculus OX=10090 GN=Ammecr1l PE=1 SV=1	Q8JZZ6	AMMECR1-like protein	Ammecr1l	310	93	257	0	3776	5339	2210	2768		417	1239	0	2289	3410	3548	3601	5547	2389		high	8	6	31
	sp|Q9DBT5|AMPD2_MOUSE AMP deaminase 2 OS=Mus musculus OX=10090 GN=Ampd2 PE=1 SV=1	Q9DBT5	AMP deaminase 2	Ampd2	1571	2041	1638	31641	10424	24346	18607	15737		2243	3958	2333	37548	36788	45066	25794	38330	32209		high	32	32	40
	sp|O08739|AMPD3_MOUSE AMP deaminase 3 OS=Mus musculus OX=10090 GN=Ampd3 PE=1 SV=2	O08739;Q3V1D3	AMP deaminase 3	Ampd3	526	1009	911	524	33165	679	1172	1930		0	0	0	0	417	0	0	0	132		high	14	14	23.4
	sp|P53995|APC1_MOUSE Anaphase-promoting complex subunit 1 OS=Mus musculus OX=10090 GN=Anapc1 PE=1 SV=2	P53995	Anaphase-promoting complex subunit 1	Anapc1	589	898	769	13764	9667	7179	6120	8414		883	1168	1852	11259	12071	11744	12578	13522	9966		high	54	54	36.3
	sp|Q8K2H6|APC10_MOUSE Anaphase-promoting complex subunit 10 OS=Mus musculus OX=10090 GN=Anapc10 PE=1 SV=1	Q8K2H6	Anaphase-promoting complex subunit 10	Anapc10	0	0	0	10930	2461	10191	8745	6832		0	0	0	10826	9739	12454	8831	7616	1252		medium	5	5	47
	sp|Q9CPX9|APC11_MOUSE Anaphase-promoting complex subunit 11 OS=Mus musculus OX=10090 GN=Anapc11 PE=3 SV=1	Q9CPX9	Anaphase-promoting complex subunit 11	Anapc11	0	0	0	1510	0	0	0	878		0	0	0	0	7041	7185	4070	10148	0		low	2	2	31
	sp|Q8BZQ7|ANC2_MOUSE Anaphase-promoting complex subunit 2 OS=Mus musculus OX=10090 GN=Anapc2 PE=1 SV=2	Q8BZQ7	Anaphase-promoting complex subunit 2	Anapc2	1119	1423	828	13474	11021	4904	3387	10833		1184	2873	2112	16972	13537	25593	7302	16497	10579		high	23	23	33.3
	sp|Q91W96|APC4_MOUSE Anaphase-promoting complex subunit 4 OS=Mus musculus OX=10090 GN=Anapc4 PE=1 SV=1	Q91W96	Anaphase-promoting complex subunit 4	Anapc4	740	1193	1250	14160	13366	10325	5736	13829		869	1727	2096	17884	15874	18355	17099	15722	12005		high	26	26	40.5
	sp|Q8BTZ4|APC5_MOUSE Anaphase-promoting complex subunit 5 OS=Mus musculus OX=10090 GN=Anapc5 PE=1 SV=1;sp|Q8BTZ4-2|APC5_MOUSE Isoform 2 of Anaphase-promoting complex subunit 5 OS=Mus musculus OX=10090 GN=Anapc5	Q8BTZ4;Q8BTZ4-2	Anaphase-promoting complex subunit 5	Anapc5	1243	2874	1015	18506	8897	6986	11760	10758		2659	3881	3860	20827	19084	14538	17018	22731	8271		high	30	30	55.1
	sp|Q9WVM3|APC7_MOUSE Anaphase-promoting complex subunit 7 OS=Mus musculus OX=10090 GN=Anapc7 PE=1 SV=3	Q9WVM3	Anaphase-promoting complex subunit 7	Anapc7	0	575	446	17332	9986	11483	12750	12859		425	378	567	23916	12847	29979	17979	22242	14421		high	22	22	51.7
	sp|Q8K1C0-2|ANGE2_MOUSE Isoform 2 of Protein angel homolog 2 OS=Mus musculus OX=10090 GN=Angel2;sp|Q8K1C0|ANGE2_MOUSE Protein angel homolog 2 OS=Mus musculus OX=10090 GN=Angel2 PE=1 SV=1;sp|Q8K1C0-3|ANGE2_MOUSE Isoform 3 of Protein angel homolog 2 OS=Mus m	Q8K1C0-2;Q8K1C0;Q8K1C0-3;Q8K1C0-5;Q8K1C0-4	Protein angel homolog 2	Angel2	1640	2657	2363	8294	9928	6460	8154	7455		2167	2077	3022	9331	12638	9545	7001	8481	7288		high	18	18	51
	sp|Q810B6|ANFY1_MOUSE Rabankyrin-5 OS=Mus musculus OX=10090 GN=Ankfy1 PE=1 SV=2;sp|Q810B6-2|ANFY1_MOUSE Isoform 2 of Rabankyrin-5 OS=Mus musculus OX=10090 GN=Ankfy1	Q810B6;Q810B6-2	Rabankyrin-5	Ankfy1	2030	3554	4529	28840	17126	12389	13815	15183		2586	3615	5042	25041	27526	18840	12571	23328	10461		high	39	39	44.7
	tr|E9Q1M6|E9Q1M6_MOUSE Ankyrin repeat and KH domain-containing 1 OS=Mus musculus OX=10090 GN=Ankhd1 PE=1 SV=1;tr|E9PUR0|E9PUR0_MOUSE Ankyrin repeat and KH domain-containing 1 OS=Mus musculus OX=10090 GN=Ankhd1 PE=1 SV=1	E9Q1M6;E9PUR0;F7DE17;F7C545;F6RRY0;F6YYD3;F6SI14;F7DD37		Ankhd1	616	897	884	26253	17035	15566	15053	21677		744	1213	1192	18263	21537	28651	22589	22665	21198		medium	69	48	39.7
	sp|Q6ZPS6|AKIB1_MOUSE Ankyrin repeat and IBR domain-containing protein 1 OS=Mus musculus OX=10090 GN=Ankib1 PE=1 SV=2	Q6ZPS6	Ankyrin repeat and IBR domain-containing protein 1	Ankib1	32	31	0	1439	0	0	542	0		0	0	27	1305	1585	702	0	15754	11139		high	8	8	11.7
	sp|Q6P1H6|ANKL2_MOUSE Ankyrin repeat and LEM domain-containing protein 2 OS=Mus musculus OX=10090 GN=Ankle2 PE=1 SV=2;sp|Q6P1H6-3|ANKL2_MOUSE Isoform 3 of Ankyrin repeat and LEM domain-containing protein 2 OS=Mus musculus OX=10090 GN=Ankle2	Q6P1H6;Q6P1H6-3;Q6P1H6-4	Ankyrin repeat and LEM domain-containing protein 2	Ankle2	297	682	811	29514	17387	12630	14428	16564		547	819	961	18306	23019	20532	15227	27284	15551		low	33	1	55.8
	sp|Q3TPE9|ANKY2_MOUSE Ankyrin repeat and MYND domain-containing protein 2 OS=Mus musculus OX=10090 GN=Ankmy2 PE=1 SV=1;sp|Q3TPE9-2|ANKY2_MOUSE Isoform 2 of Ankyrin repeat and MYND domain-containing protein 2 OS=Mus musculus OX=10090 GN=Ankmy2	Q3TPE9;Q3TPE9-2	Ankyrin repeat and MYND domain-containing protein 2	Ankmy2	2112	2341	867	9915	8809	9074	8746	6467		2023	1778	1775	7310	6349	7533	7908	5512	7215		high	12	12	45
	sp|Q99LW0|ANR10_MOUSE Ankyrin repeat domain-containing protein 10 OS=Mus musculus OX=10090 GN=Ankrd10 PE=2 SV=2	Q99LW0	Ankyrin repeat domain-containing protein 10	Ankrd10	0	256	372	12869	4206	2039	7477	1510		500	531	466	21422	17265	5530	27814	8090	2781		high	11	11	46.7
	sp|E9Q4F7|ANR11_MOUSE Ankyrin repeat domain-containing protein 11 OS=Mus musculus OX=10090 GN=Ankrd11 PE=1 SV=1	E9Q4F7		Ankrd11	46	81	41	255	295	0	293	259		121	43	113	538	409	758	258	494	263		high	20	20	9.2
	tr|G5E893|G5E893_MOUSE Ankyrin repeat domain 12 OS=Mus musculus OX=10090 GN=Ankrd12 PE=1 SV=1	G5E893;Q3U569		Ankrd12	32	52	66	0	584	120	213	792		0	0	42	2561	1736	2540	100	726	744		high	11	11	7
	sp|Q80UP5|AN13A_MOUSE Ankyrin repeat domain-containing protein 13A OS=Mus musculus OX=10090 GN=Ankrd13a PE=1 SV=2	Q80UP5	Ankyrin repeat domain-containing protein 13A	Ankrd13a	6721	4860	6583	10690	11449	13897	10122	12147		6985	5324	7720	8471	11298	12727	12337	8935	7463		high	19	18	42.2
	sp|Q3UX43|AN13C_MOUSE Ankyrin repeat domain-containing protein 13C OS=Mus musculus OX=10090 GN=Ankrd13c PE=1 SV=2	Q3UX43	Ankyrin repeat domain-containing protein 13C	Ankrd13c	0	0	0	0	0	0	0	0		0	0	0	193	395	0	0	0	0		low	2	2	4.6
	sp|A2AS55|ANR16_MOUSE Ankyrin repeat domain-containing protein 16 OS=Mus musculus OX=10090 GN=Ankrd16 PE=1 SV=1;sp|A2AS55-2|ANR16_MOUSE Isoform 2 of Ankyrin repeat domain-containing protein 16 OS=Mus musculus OX=10090 GN=Ankrd16	A2AS55;A2AS55-2	Ankyrin repeat domain-containing protein 16	Ankrd16	0	0	0	360	0	0	0	0		0	0	0	421	520	0	855	0	0		low	2	2	9.1
	sp|Q99NH0|ANR17_MOUSE Ankyrin repeat domain-containing protein 17 OS=Mus musculus OX=10090 GN=Ankrd17 PE=1 SV=2;sp|Q99NH0-3|ANR17_MOUSE Isoform 3 of Ankyrin repeat domain-containing protein 17 OS=Mus musculus OX=10090 GN=Ankrd17;sp|Q99NH0-2|ANR17_MOUSE Iso	Q99NH0;Q99NH0-3;Q99NH0-2	Ankyrin repeat domain-containing protein 17	Ankrd17	212	221	375	13236	9956	8821	8569	8939		321	308	255	13704	12094	9878	10499	13379	6767		high	46	46	33.6
	sp|Q3UMR0|ANR27_MOUSE Ankyrin repeat domain-containing protein 27 OS=Mus musculus OX=10090 GN=Ankrd27 PE=1 SV=2;sp|Q3UMR0-2|ANR27_MOUSE Isoform 2 of Ankyrin repeat domain-containing protein 27 OS=Mus musculus OX=10090 GN=Ankrd27;sp|Q3UMR0-3|ANR27_MOUSE Iso	Q3UMR0;Q3UMR0-2;Q3UMR0-3	Ankyrin repeat domain-containing protein 27	Ankrd27	25	102	76	4465	1907	2599	1860	1879		25	89	87	2933	1828	2859	2406	2241	2852		high	26	26	33.6
	sp|Q505D1|ANR28_MOUSE Serine/threonine-protein phosphatase 6 regulatory ankyrin repeat subunit A OS=Mus musculus OX=10090 GN=Ankrd28 PE=1 SV=1	Q505D1	Serine/threonine-protein phosphatase 6 regulatory ankyrin repeat subunit A	Ankrd28	315	765	631	13274	8808	13153	9282	6423		388	797	470	10880	14487	17079	17148	10952	8676		high	29	29	44.8
	sp|Q8R3P9|SLF1_MOUSE SMC5-SMC6 complex localization factor protein 1 OS=Mus musculus OX=10090 GN=Slf1 PE=1 SV=3	Q8R3P9;Q8R3P9-2	Ankyrin repeat domain-containing protein 32	Ankrd32	0	0	0	164	922	733	124	452		0	0	0	1294	1345	1332	430	1342	810		high	15	15	20.9
	sp|Q9D2X0|ANR39_MOUSE Ankyrin repeat domain-containing protein 39 OS=Mus musculus OX=10090 GN=Ankrd39 PE=1 SV=1	Q9D2X0	Ankyrin repeat domain-containing protein 39	Ankrd39	0	0	0	4745	4148	743	4195	332		0	0	0	5630	5021	1309	322	1033	5645		medium	3	3	26.2
	sp|Q5SUE8|ANR40_MOUSE Ankyrin repeat domain-containing protein 40 OS=Mus musculus OX=10090 GN=Ankrd40 PE=1 SV=1;sp|Q5SUE8-2|ANR40_MOUSE Isoform 2 of Ankyrin repeat domain-containing protein 40 OS=Mus musculus OX=10090 GN=Ankrd40;sp|Q5SUE8-3|ANR40_MOUSE Iso	Q5SUE8;Q5SUE8-2;Q5SUE8-3	Ankyrin repeat domain-containing protein 40	Ankrd40	0	0	0	2914	2581	2421	1082	2555		0	0	0	8659	1915	2750	9133	8065	1166		medium	7	7	27
	sp|B2RXR6|ANR44_MOUSE Serine/threonine-protein phosphatase 6 regulatory ankyrin repeat subunit B OS=Mus musculus OX=10090 GN=Ankrd44 PE=1 SV=1	B2RXR6	Serine/threonine-protein phosphatase 6 regulatory ankyrin repeat subunit B	Ankrd44	21345	32575	35601	115418	125645	108504	116626	108009		29659	37313	41808	88214	83503	91665	92922	98627	69659		high	50	49	70.5
	sp|Q8BTZ5|ANR46_MOUSE Ankyrin repeat domain-containing protein 46 OS=Mus musculus OX=10090 GN=Ankrd46 PE=1 SV=1	Q8BTZ5	Ankyrin repeat domain-containing protein 46	Ankrd46	0	0	0	6528	5514	6148	4273	10088		189	0	207	0	0	18379	2508	9858	8203		medium	3	3	17.1
	tr|F7BE84|F7BE84_MOUSE Ankyrin repeat domain 50 (Fragment) OS=Mus musculus OX=10090 GN=Ankrd50 PE=1 SV=1	F7BE84;A6H6J9		Ankrd50	0	72	143	680	1065	477	76	298		0	50	0	926	403	495	0	218	76		high	13	13	12.9
	sp|Q8BTI7|ANR52_MOUSE Serine/threonine-protein phosphatase 6 regulatory ankyrin repeat subunit C OS=Mus musculus OX=10090 GN=Ankrd52 PE=1 SV=1	Q8BTI7	Serine/threonine-protein phosphatase 6 regulatory ankyrin repeat subunit C	Ankrd52	0	10	0	17458	9203	8566	4581	6798		0	0	12	14103	8695	19038	13704	14730	8948		high	32	32	43.4
	sp|Q91WK7|ANR54_MOUSE Ankyrin repeat domain-containing protein 54 OS=Mus musculus OX=10090 GN=Ankrd54 PE=1 SV=1	Q91WK7	Ankyrin repeat domain-containing protein 54	Ankrd54	1498	600	117	1539	0	0	637	0		2540	1015	1179	2723	1924	1897	1497	1504	1992		medium	3	3	18.7
	sp|P59672|ANS1A_MOUSE Ankyrin repeat and SAM domain-containing protein 1A OS=Mus musculus OX=10090 GN=Anks1a PE=1 SV=3	P59672	Ankyrin repeat and SAM domain-containing protein 1A	Anks1a	0	84	142	3185	2591	929	1910	2883		24	0	15	1848	1467	992	1576	840	1557		low	23	1	29.1
	sp|Q80UU1|ANKZ1_MOUSE Ankyrin repeat and zinc finger domain-containing protein 1 OS=Mus musculus OX=10090 GN=Ankzf1 PE=1 SV=2	Q80UU1;Q80UU1-2	Ankyrin repeat and zinc finger domain-containing protein 1	Ankzf1	143	206	394	4308	3122	1393	1528	2072		303	220	598	3693	3413	2459	3363	3452	799		high	21	21	36.8
	sp|Q8K298|ANLN_MOUSE Anillin OS=Mus musculus OX=10090 GN=Anln PE=1 SV=2	Q8K298	Actin-binding protein anillin	Anln	0	0	0	2301	1431	1665	419	827		0	0	0	4477	5091	10023	4525	5786	5650		high	29	29	34.5
	sp|Q8BH79-2|ANO10_MOUSE Isoform 2 of Anoctamin-10 OS=Mus musculus OX=10090 GN=Ano10;sp|Q8BH79|ANO10_MOUSE Anoctamin-10 OS=Mus musculus OX=10090 GN=Ano10 PE=1 SV=1;sp|Q8BH79-4|ANO10_MOUSE Isoform 4 of Anoctamin-10 OS=Mus musculus OX=10090 GN=Ano10;sp|Q8BH79	Q8BH79-2;Q8BH79;Q8BH79-4;Q8BH79-3	Anoctamin-10	Ano10	206	493	204	1499	872	994	893	1556		103	815	112	1096	577	1319	1334	1098	1437		medium	7	7	11.5
	sp|Q6P9J9|ANO6_MOUSE Anoctamin-6 OS=Mus musculus OX=10090 GN=Ano6 PE=1 SV=1	Q6P9J9;Q6P9J9-2	Anoctamin-6	Ano6	1497	1882	1742	1672	1475	2622	2426	2089		2096	1886	1932	6047	4764	4814	5125	6716	4240		high	21	21	25.2
	sp|O35381|AN32A_MOUSE Acidic leucine-rich nuclear phosphoprotein 32 family member A OS=Mus musculus OX=10090 GN=Anp32a PE=1 SV=1	O35381	Acidic leucine-rich nuclear phosphoprotein 32 family member A	Anp32a	1251545	1314160	1201216	2242754	1633545	1451016	1798333	1978647		1268222	1519332	1534791	1613066	1466732	1538208	1386687	2011703	1250525		medium	21	14	58.3
	sp|Q9EST5|AN32B_MOUSE Acidic leucine-rich nuclear phosphoprotein 32 family member B OS=Mus musculus OX=10090 GN=Anp32b PE=1 SV=1;sp|Q9EST5-2|AN32B_MOUSE Isoform 2 of Acidic leucine-rich nuclear phosphoprotein 32 family member B OS=Mus musculus OX=10090 GN=	Q9EST5;Q9EST5-2	Acidic leucine-rich nuclear phosphoprotein 32 family member B	Anp32b	100584	116872	103998	1141502	713530	747422	580745	615195		70694	89449	94241	1027969	1332077	1191848	874472	1352854	954409		high	12	12	29.8
	sp|P97822|AN32E_MOUSE Acidic leucine-rich nuclear phosphoprotein 32 family member E OS=Mus musculus OX=10090 GN=Anp32e PE=1 SV=2;sp|P97822-2|AN32E_MOUSE Isoform 2 of Acidic leucine-rich nuclear phosphoprotein 32 family member E OS=Mus musculus OX=10090 GN=	P97822;P97822-2;P97822-3	Acidic leucine-rich nuclear phosphoprotein 32 family member E	Anp32e	78556	73606	72994	542388	537764	485268	433606	573743		94486	107451	89742	496850	491438	459254	590707	633908	278847		high	12	12	59.2
	sp|Q6DFX2|ANTR2_MOUSE Anthrax toxin receptor 2 OS=Mus musculus OX=10090 GN=Antxr2 PE=1 SV=1	Q6DFX2	Anthrax toxin receptor 2	Antxr2	993	0	794	0	0	0	0	606		217	380	467	0	0	0	0	540	0		medium	5	5	13.8
	sp|P10107|ANXA1_MOUSE Annexin A1 OS=Mus musculus OX=10090 GN=Anxa1 PE=1 SV=2	P10107	Annexin A1	Anxa1	0	0	0	639	7961	0	3129	10202		0	50	0	43	1362	0	231	2023	698		high	10	10	43.1
	sp|P97384|ANX11_MOUSE Annexin A11 OS=Mus musculus OX=10090 GN=Anxa11 PE=1 SV=2	P97384	Annexin A11	Anxa11	14949	20317	30022	127882	108903	88138	109302	127097		24831	30124	46601	143346	141942	149405	97931	100255	64271		high	27	27	45.7
	sp|P07356|ANXA2_MOUSE Annexin A2 OS=Mus musculus OX=10090 GN=Anxa2 PE=1 SV=2	P07356	Annexin A2	Anxa2	8563	7760	8024	123496	323347	51360	110028	243286		9308	11893	9483	193771	307325	102176	221334	258845	42947		high	27	27	70.5
	sp|O35639|ANXA3_MOUSE Annexin A3 OS=Mus musculus OX=10090 GN=Anxa3 PE=1 SV=4	O35639	Annexin A3	Anxa3	0	0	0	2808	3022	5240	3709	4616		0	0	0	1470	6167	2403	1716	3715	2419		high	8	8	30.7
	sp|P97429|ANXA4_MOUSE Annexin A4 OS=Mus musculus OX=10090 GN=Anxa4 PE=1 SV=4	P97429	Annexin A4	Anxa4	160	131	0	10553	19189	5836	6190	15193		210	0	83	5875	11248	4272	8824	12732	2833		high	14	14	49.8
	sp|P48036|ANXA5_MOUSE Annexin A5 OS=Mus musculus OX=10090 GN=Anxa5 PE=1 SV=1	P48036	Annexin A5	Anxa5	184069	171851	191293	533210	542969	368029	819060	562230		166900	149266	177754	341211	356787	217053	342673	410482	292883		high	31	31	83.1
	sp|P14824|ANXA6_MOUSE Annexin A6 OS=Mus musculus OX=10090 GN=Anxa6 PE=1 SV=3	P14824	Annexin A6	Anxa6	475858	554143	537060	1852318	1674979	1486720	1291744	1894914		850086	1067701	1033991	1873311	1641984	2309042	1879963	1973704	1673536		high	78	77	86.9
	sp|Q07076|ANXA7_MOUSE Annexin A7 OS=Mus musculus OX=10090 GN=Anxa7 PE=1 SV=2	Q07076	Annexin A7	Anxa7	4793	5290	8668	165048	97962	119166	128858	116525		12510	11194	13404	189204	215411	232905	182300	179694	166983		high	23	23	47.5
	tr|E9PYF7|E9PYF7_MOUSE AP1AR OS=Mus musculus OX=10090 GN=Ap1ar PE=1 SV=1;tr|A0A0G2JG85|A0A0G2JG85_MOUSE Adaptor-related protein complex 1-associated regulatory protein OS=Mus musculus OX=10090 GN=Ap1ar PE=1 SV=1	E9PYF7;A0A0G2JG85		Ap1ar	543	0	555	2873	1737	1627	1233	0		917	1336	1284	936	0	1072	0	1420	1676		medium	4	4	18.5
	sp|O35643|AP1B1_MOUSE AP-1 complex subunit beta-1 OS=Mus musculus OX=10090 GN=Ap1b1 PE=1 SV=2	O35643	AP-1 complex subunit beta-1	Ap1b1	25119	34260	31840	292453	174872	209777	162531	193873		32411	35084	38930	227039	193382	236261	206283	197086	190724		medium	50	28	60.1
	sp|P22892|AP1G1_MOUSE AP-1 complex subunit gamma-1 OS=Mus musculus OX=10090 GN=Ap1g1 PE=1 SV=3	P22892	AP-1 complex subunit gamma-1	Ap1g1	6453	8191	7842	48745	32281	39082	25348	38207		5632	8912	11863	60394	59322	58748	36606	52532	41266		high	39	39	54.7
	sp|O88512|AP1G2_MOUSE AP-1 complex subunit gamma-like 2 OS=Mus musculus OX=10090 GN=Ap1g2 PE=1 SV=2	O88512	AP-1 complex subunit gamma-like 2	Ap1g2	2628	4126	3628	33149	20608	11812	13597	20487		4926	3667	5481	33828	34684	28412	20420	32340	28465		high	34	34	57.1
	sp|P35585|AP1M1_MOUSE AP-1 complex subunit mu-1 OS=Mus musculus OX=10090 GN=Ap1m1 PE=1 SV=3	P35585	AP-1 complex subunit mu-1	Ap1m1	25422	26537	33901	203914	150692	140750	154559	217931		29128	37130	41686	217507	187823	260197	206559	154959	175881		high	25	20	62.9
	sp|P61967|AP1S1_MOUSE AP-1 complex subunit sigma-1A OS=Mus musculus OX=10090 GN=Ap1s1 PE=1 SV=1	P61967	AP-1 complex subunit sigma-1A	Ap1s1	3130	3743	3945	18249	60470	39081	22924	30314		5193	4877	10568	57762	42941	70582	41696	48438	49392		medium	7	5	46.8
	sp|Q9DB50|AP1S2_MOUSE AP-1 complex subunit sigma-2 OS=Mus musculus OX=10090 GN=Ap1s2 PE=1 SV=1	Q9DB50	AP-1 complex subunit sigma-2	Ap1s2	0	1452	0	0	0	0	0	6411		3113	0	3234	8061	5829	3877	3231	5062	924		low	2	2	20
	sp|Q7TN05|AP1S3_MOUSE AP-1 complex subunit sigma-3 OS=Mus musculus OX=10090 GN=Ap1s3 PE=1 SV=1	Q7TN05	AP-1 complex subunit sigma-3	Ap1s3	583	0	0	4120	1542	1154	0	0		1551	0	1264	7111	6160	0	7090	8065	0		medium	3	3	20.8
	sp|P17426-2|AP2A1_MOUSE Isoform B of AP-2 complex subunit alpha-1 OS=Mus musculus OX=10090 GN=Ap2a1;sp|P17426|AP2A1_MOUSE AP-2 complex subunit alpha-1 OS=Mus musculus OX=10090 GN=Ap2a1 PE=1 SV=1	P17426-2;P17426	AP-2 complex subunit alpha-1	Ap2a1	4553	7438	5079	83764	52861	54326	45386	64100		3964	8005	12880	72553	83028	76795	69264	80591	56925		high	48	37	55.6
	sp|P17427|AP2A2_MOUSE AP-2 complex subunit alpha-2 OS=Mus musculus OX=10090 GN=Ap2a2 PE=1 SV=2	P17427	AP-2 complex subunit alpha-2	Ap2a2	6381	7462	6505	51273	41736	27413	27847	37665		4609	4830	5345	42376	28701	40365	28496	35916	26685		high	35	35	59.6
	sp|Q9DBG3|AP2B1_MOUSE AP-2 complex subunit beta OS=Mus musculus OX=10090 GN=Ap2b1 PE=1 SV=1;sp|Q9DBG3-2|AP2B1_MOUSE Isoform 2 of AP-2 complex subunit beta OS=Mus musculus OX=10090 GN=Ap2b1	Q9DBG3;Q9DBG3-2	AP-2 complex subunit beta	Ap2b1	6579	7580	8762	69590	37090	43829	48239	48984		11056	8273	10007	72866	61865	64923	46697	139323	67565		high	28	28	59
	sp|P84091|AP2M1_MOUSE AP-2 complex subunit mu OS=Mus musculus OX=10090 GN=Ap2m1 PE=1 SV=1	P84091	AP-2 complex subunit mu	Ap2m1	26011	27865	24828	129846	104256	93211	107377	101302		26429	29436	26263	135913	130001	90450	93851	129088	108863		high	25	25	57.7
	sp|P62743|AP2S1_MOUSE AP-2 complex subunit sigma OS=Mus musculus OX=10090 GN=Ap2s1 PE=1 SV=1	P62743	AP-2 complex subunit sigma	Ap2s1	684	0	781	94328	51270	50078	115219	73533		2963	1480	487	93681	93181	89494	58250	79193	42590		medium	7	7	47.2
	sp|Q9Z1T1|AP3B1_MOUSE AP-3 complex subunit beta-1 OS=Mus musculus OX=10090 GN=Ap3b1 PE=1 SV=2	Q9Z1T1	AP-3 complex subunit beta-1	Ap3b1	3599	5779	4937	17015	17437	18081	11512	17816		4514	6491	7083	11992	14418	16713	16138	20684	13645		high	41	35	42.4
	sp|O54774|AP3D1_MOUSE AP-3 complex subunit delta-1 OS=Mus musculus OX=10090 GN=Ap3d1 PE=1 SV=1	O54774	AP-3 complex subunit delta-1	Ap3d1	3859	4481	5103	17025	16666	15456	15212	13034		3644	4973	5846	18051	15236	35691	22684	14237	17724		high	46	46	46.5
	sp|Q9JKC8|AP3M1_MOUSE AP-3 complex subunit mu-1 OS=Mus musculus OX=10090 GN=Ap3m1 PE=1 SV=1	Q9JKC8	AP-3 complex subunit mu-1	Ap3m1	4509	4895	4963	35232	35588	34452	15872	22520		4652	5330	5445	39433	33497	51323	40081	31607	17816		high	15	12	51.9
	sp|Q8R2R9|AP3M2_MOUSE AP-3 complex subunit mu-2 OS=Mus musculus OX=10090 GN=Ap3m2 PE=1 SV=1	Q8R2R9	AP-3 complex subunit mu-2	Ap3m2	577	249	889	0	0	0	0	0		1095	1267	1154	487	0	379	0	3397	0		high	8	8	40.7
	sp|Q9DCR2|AP3S1_MOUSE AP-3 complex subunit sigma-1 OS=Mus musculus OX=10090 GN=Ap3s1 PE=1 SV=2	Q9DCR2	AP-3 complex subunit sigma-1	Ap3s1	3262	3509	5945	24937	22551	19218	15984	16893		2998	7620	6968	44539	42395	22261	34385	19717	24057		high	8	8	47.7
	sp|Q8BSZ2|AP3S2_MOUSE AP-3 complex subunit sigma-2 OS=Mus musculus OX=10090 GN=Ap3s2 PE=1 SV=1	Q8BSZ2	AP-3 complex subunit sigma-2	Ap3s2	0	231	0	1048	988	4326	3559	0		759	603	353	3489	2000	0	2032	2563	4719		medium	5	5	32.6
	sp|Q9WV76|AP4B1_MOUSE AP-4 complex subunit beta-1 OS=Mus musculus OX=10090 GN=Ap4b1 PE=1 SV=2	Q9WV76	AP-4 complex subunit beta-1	Ap4b1	0	116	45	668	3079	891	1171	868		61	0	131	2376	1010	6597	774	1635	993		high	12	12	22.4
	sp|Q80V94|AP4E1_MOUSE AP-4 complex subunit epsilon-1 OS=Mus musculus OX=10090 GN=Ap4e1 PE=1 SV=3	Q80V94	AP-4 complex subunit epsilon-1	Ap4e1	50	30	0	1255	642	413	1459	669		41	0	107	1977	2011	1586	898	2189	905		high	16	16	21.1
	sp|Q9JKC7|AP4M1_MOUSE AP-4 complex subunit mu-1 OS=Mus musculus OX=10090 GN=Ap4m1 PE=1 SV=1	Q9JKC7	AP-4 complex subunit mu-1	Ap4m1	108	93	0	1984	2303	2543	789	2595		91	0	323	1995	1581	6370	1557	624	3323		medium	7	7	20.5
	sp|Q9WVL1|AP4S1_MOUSE AP-4 complex subunit sigma-1 OS=Mus musculus OX=10090 GN=Ap4s1 PE=2 SV=1	Q9WVL1	AP-4 complex subunit sigma-1	Ap4s1	0	0	398	7644	0	7384	3691	7988		409	370	778	2924	2754	4279	10227	1954	5754		medium	4	4	27.8
	sp|Q3TAP4|AP5B1_MOUSE AP-5 complex subunit beta-1 OS=Mus musculus OX=10090 GN=Ap5b1 PE=1 SV=1	Q3TAP4	AP-5 complex subunit beta-1	Ap5b1	0	24	68	0	0	0	138	308		0	0	33	0	0	0	2917	222	529		high	8	8	11.9
	sp|Q8BJ63|AP5M1_MOUSE AP-5 complex subunit mu-1 OS=Mus musculus OX=10090 GN=Ap5m1 PE=1 SV=2;sp|Q8BJ63-2|AP5M1_MOUSE Isoform 2 of AP-5 complex subunit mu-1 OS=Mus musculus OX=10090 GN=Ap5m1	Q8BJ63;Q8BJ63-2;Q8BJ63-3	AP-5 complex subunit mu-1	Ap5m1	329	617	163	926	833	897	401	869		60	218	481	439	338	1984	1241	0	837		medium	7	7	16.3
	sp|Q3U829|AP5Z1_MOUSE AP-5 complex subunit zeta-1 OS=Mus musculus OX=10090 GN=Ap5z1 PE=2 SV=1	Q3U829	AP-5 complex subunit zeta-1	Ap5z1	0	59	79	0	0	0	0	0		0	0	0	0	46	520	458	622	0		medium	5	5	9.7
	sp|O88879|APAF_MOUSE Apoptotic protease-activating factor 1 OS=Mus musculus OX=10090 GN=Apaf1 PE=1 SV=3;sp|O88879-2|APAF_MOUSE Isoform 2 of Apoptotic protease-activating factor 1 OS=Mus musculus OX=10090 GN=Apaf1	O88879;O88879-2	Apoptotic protease-activating factor 1	Apaf1	1163	1853	1446	3187	1361	1156	1153	3684		942	1240	1305	1331	1632	1732	952	1005	425		high	34	34	35.5
	sp|Q8R5A3|AB1IP_MOUSE Amyloid beta A4 precursor protein-binding family B member 1-interacting protein OS=Mus musculus OX=10090 GN=Apbb1ip PE=1 SV=2	Q8R5A3;S4R2K5	Amyloid beta A4 precursor protein-binding family B member 1-interacting protein	Apbb1ip	9407	12241	14733	88326	40840	50255	67753	75650		15424	16723	12333	103291	123244	76843	111417	125341	54123		high	24	22	41.8
	sp|Q61315-2|APC_MOUSE Isoform 2 of Adenomatous polyposis coli protein OS=Mus musculus OX=10090 GN=Apc;sp|Q61315|APC_MOUSE Adenomatous polyposis coli protein OS=Mus musculus OX=10090 GN=Apc PE=1 SV=1;sp|Q61315-4|APC_MOUSE Isoform 4 of Adenomatous polyposis	Q61315-2;Q61315;Q61315-4;Q61315-3	Adenomatous polyposis coli protein	Apc	0	6	0	146	764	454	4	240		0	0	0	257	48	45	226	746	92		high	14	14	7
	sp|Q8R146-2|APEH_MOUSE Isoform 2 of Acylamino-acid-releasing enzyme OS=Mus musculus OX=10090 GN=Apeh;sp|Q8R146|APEH_MOUSE Acylamino-acid-releasing enzyme OS=Mus musculus OX=10090 GN=Apeh PE=1 SV=3	Q8R146-2;Q8R146	Acylamino-acid-releasing enzyme	Apeh	12444	17839	17868	78606	57985	49074	58998	56016		25372	28711	30638	62597	54905	68945	45119	61964	31983		high	32	32	65.8
	sp|P28352|APEX1_MOUSE DNA-(apurinic or apyrimidinic site) endonuclease OS=Mus musculus OX=10090 GN=Apex1 PE=1 SV=2	P28352	DNA-(apurinic or apyrimidinic site) lyase;DNA-(apurinic or apyrimidinic site) lyase, mitochondrial	Apex1	153477	115198	153122	867726	659233	555940	634246	724025		334004	324001	317804	1035418	942739	897697	889779	877089	700555		high	25	25	76
	sp|Q68G58|APEX2_MOUSE DNA-(apurinic or apyrimidinic site) endonuclease 2 OS=Mus musculus OX=10090 GN=Apex2 PE=1 SV=1;sp|Q68G58-2|APEX2_MOUSE Isoform 2 of DNA-(apurinic or apyrimidinic site) endonuclease 2 OS=Mus musculus OX=10090 GN=Apex2;sp|Q68G58-3|APEX2	Q68G58;Q68G58-2;Q68G58-3;Q68G58-5;Q68G58-4	DNA-(apurinic or apyrimidinic site) lyase 2	Apex2	0	0	0	6701	1535	703	0	1165		0	0	0	7123	5140	4021	2415	3855	3187		high	8	8	21.5
	sp|Q8BVF7-2|APH1A_MOUSE Isoform 2 of Gamma-secretase subunit APH-1A OS=Mus musculus OX=10090 GN=Aph1a;sp|Q8BVF7|APH1A_MOUSE Gamma-secretase subunit APH-1A OS=Mus musculus OX=10090 GN=Aph1a PE=1 SV=2	Q8BVF7-2;Q8BVF7	Gamma-secretase subunit APH-1A	Aph1a	439	558	0	0	1911	0	0	0		0	0	347	4363	4105	3239	2382	2839	3559		medium	3	3	8.1
	sp|O35841|API5_MOUSE Apoptosis inhibitor 5 OS=Mus musculus OX=10090 GN=Api5 PE=1 SV=2	O35841	Apoptosis inhibitor 5	Api5	33732	39800	52155	465937	245998	222901	315084	235540		40889	56737	50160	367031	398188	288649	278771	382483	194269		high	34	34	67.3
	sp|Q9WVQ5|MTNB_MOUSE Methylthioribulose-1-phosphate dehydratase OS=Mus musculus OX=10090 GN=Apip PE=1 SV=1	Q9WVQ5	Methylthioribulose-1-phosphate dehydratase	Apip	1955	1863	3790	36331	20839	17688	8642	22927		2400	3121	1518	25803	30957	24340	14644	17069	16196		high	11	11	57.3
	sp|Q9D084|CENPS_MOUSE Centromere protein S OS=Mus musculus OX=10090 GN=Cenps PE=2 SV=1;sp|Q9D084-2|CENPS_MOUSE Isoform 2 of Centromere protein S OS=Mus musculus OX=10090 GN=Cenps	Q9D084;Q9D084-2	Centromere protein S	Apitd1	0	0	0	2989	11110	5516	4628	12786		0	0	0	4281	5613	28082	6892	0	11418		medium	5	5	43.7
	sp|Q9D842|APLF_MOUSE Aprataxin and PNK-like factor OS=Mus musculus OX=10090 GN=Aplf PE=1 SV=2;sp|Q9D842-2|APLF_MOUSE Isoform 2 of Aprataxin and PNK-like factor OS=Mus musculus OX=10090 GN=Aplf;sp|Q9D842-3|APLF_MOUSE Isoform 3 of Aprataxin and PNK-like fact	Q9D842;Q9D842-2;Q9D842-3	Aprataxin and PNK-like factor	Aplf	207	649	533	1203	319	1123	2392	635		413	362	305	984	2948	790	1804	0	1259		high	11	11	36.7
	sp|Q9D7N9|APMAP_MOUSE Adipocyte plasma membrane-associated protein OS=Mus musculus OX=10090 GN=Apmap PE=1 SV=1	Q9D7N9	Adipocyte plasma membrane-associated protein	Apmap	22019	18821	21766	48546	59319	44526	25181	57210		31509	33419	38970	38134	57065	43538	45071	29347	53224		high	18	18	57.1
	sp|Q8K4Z3|NNRE_MOUSE NAD(P)H-hydrate epimerase OS=Mus musculus OX=10090 GN=Naxe PE=1 SV=1	Q8K4Z3	NAD(P)H-hydrate epimerase	Apoa1bp	862	1544	2548	5556	1517	1737	0	0		2161	2317	2225	4513	1733	2810	2122	1087	0		medium	6	6	31.6
	sp|E9Q414|APOB_MOUSE Apolipoprotein B-100 OS=Mus musculus OX=10090 GN=Apob PE=1 SV=1	E9Q414	Apolipoprotein B-100;Apolipoprotein B-48	Apob	0	0	128	1986	207	0	258	181		0	17	250	584	271	276	470	505	430		medium	7	7	2.8
	sp|Q99J72-3|ABEC3_MOUSE Isoform 3 of DNA dC->dU-editing enzyme APOBEC-3 OS=Mus musculus OX=10090 GN=Apobec3;sp|Q99J72-4|ABEC3_MOUSE Isoform 4 of DNA dC->dU-editing enzyme APOBEC-3 OS=Mus musculus OX=10090 GN=Apobec3;sp|Q99J72-2|ABEC3_MOUSE Isoform 2 of DNA	Q99J72-3;Q99J72-4;Q99J72-2;Q99J72	DNA dC->dU-editing enzyme APOBEC-3	Apobec3	4033	5536	6069	151748	122531	120103	112513	101263		13434	19567	17979	232931	198022	257673	186585	210134	182281		high	20	20	45.9
	sp|Q8VBT6|APOBR_MOUSE Apolipoprotein B receptor OS=Mus musculus OX=10090 GN=Apobr PE=1 SV=1	Q8VBT6	Apolipoprotein B receptor	Apobr	0	83	51	312	186	0	0	0		54	46	0	0	0	0	0	0	0		medium	5	5	7.2
	sp|P08226|APOE_MOUSE Apolipoprotein E OS=Mus musculus OX=10090 GN=Apoe PE=1 SV=2	P08226	Apolipoprotein E	Apoe	648	0	363	0	0	1049	0	0		84	0	179	0	0	0	0	0	0		medium	5	5	17.4
	sp|Q9DCZ4-2|MIC26_MOUSE Isoform 2 of MICOS complex subunit Mic26 OS=Mus musculus OX=10090 GN=Apoo;sp|Q9DCZ4|MIC26_MOUSE MICOS complex subunit Mic26 OS=Mus musculus OX=10090 GN=Apoo PE=1 SV=2;sp|Q9DCZ4-3|MIC26_MOUSE Isoform 3 of MICOS complex subunit Mic26	Q9DCZ4-2;Q9DCZ4;Q9DCZ4-3	Apolipoprotein O	Apoo	870	0	0	38788	13851	32778	31369	35537		2810	2374	0	87732	81639	77429	47737	72444	28186		medium	5	5	48.2
	sp|Q78IK4|MIC27_MOUSE MICOS complex subunit Mic27 OS=Mus musculus OX=10090 GN=Apool PE=1 SV=1	Q78IK4	MICOS complex subunit Mic27	Apool	6209	8149	11735	107134	94737	129457	142419	110111		9906	15951	12196	99903	86647	119043	84357	135600	79948		high	14	14	61.5
	sp|Q9CQW7|COA8_MOUSE Cytochrome c oxidase assembly factor 8 OS=Mus musculus OX=10090 GN=Coa8 PE=1 SV=1;sp|Q9CQW7-2|COA8_MOUSE Isoform 2 of Cytochrome c oxidase assembly factor 8 OS=Mus musculus OX=10090 GN=Coa8	Q9CQW7;Q9CQW7-2	Apoptogenic protein 1, mitochondrial	Apopt1	0	0	0	6585	3324	2087	0	0		254	0	0	6662	7463	6811	7363	9100	6730		medium	6	6	33.3
	sp|Q9DAX9|APBP2_MOUSE Amyloid protein-binding protein 2 OS=Mus musculus OX=10090 GN=Appbp2 PE=2 SV=1	Q9DAX9	Amyloid protein-binding protein 2	Appbp2	44	105	0	6509	4808	8427	2706	4966		106	90	196	9013	9213	10201	6877	6566	5583		high	14	14	31.3
	sp|Q8K3H0|DP13A_MOUSE DCC-interacting protein 13-alpha OS=Mus musculus OX=10090 GN=Appl1 PE=1 SV=1	Q8K3H0	DCC-interacting protein 13-alpha	Appl1	3767	5556	5407	26243	26282	20382	24605	21203		5046	5855	6206	34858	36093	35221	19963	30302	26026		high	32	31	57.4
	sp|Q8K3G9|DP13B_MOUSE DCC-interacting protein 13-beta OS=Mus musculus OX=10090 GN=Appl2 PE=1 SV=1	Q8K3G9	DCC-interacting protein 13-beta	Appl2	66	92	74	0	0	0	0	0		421	89	307	499	447	639	343	1156	0		medium	5	5	14.2
	sp|P08030|APT_MOUSE Adenine phosphoribosyltransferase OS=Mus musculus OX=10090 GN=Aprt PE=1 SV=2	P08030	Adenine phosphoribosyltransferase	Aprt	13403	12278	24967	499736	306289	325657	273241	295824		32875	44000	29730	555303	692693	516806	528399	324173	383839		high	11	11	82.8
	sp|Q7TQC5-3|APTX_MOUSE Isoform 3 of Aprataxin OS=Mus musculus OX=10090 GN=Aptx;sp|Q7TQC5|APTX_MOUSE Aprataxin OS=Mus musculus OX=10090 GN=Aptx PE=1 SV=2;sp|Q7TQC5-4|APTX_MOUSE Isoform 4 of Aprataxin OS=Mus musculus OX=10090 GN=Aptx;sp|Q7TQC5-2|APTX_MOUSE I	Q7TQC5-3;Q7TQC5;Q7TQC5-4;Q7TQC5-2	Aprataxin	Aptx	1274	1490	1672	22820	21742	5224	7500	4310		251	1955	2145	6618	5643	4762	12058	1970	5030		high	8	8	27.5
	sp|Q8CFQ3|AQR_MOUSE RNA helicase aquarius OS=Mus musculus OX=10090 GN=Aqr PE=1 SV=2	Q8CFQ3	Intron-binding protein aquarius	Aqr	3334	5540	6756	82123	68498	57738	52671	65637		4689	7632	7073	91381	93978	119838	80617	96636	67271		high	67	67	54.2
	sp|P04627|ARAF_MOUSE Serine/threonine-protein kinase A-Raf OS=Mus musculus OX=10090 GN=Araf PE=1 SV=2	P04627	Serine/threonine-protein kinase A-Raf	Araf	4250	7411	5994	28237	27454	24335	17346	20422		6545	8719	5852	34122	19162	30136	24177	32012	26733		high	26	20	48
	sp|Q4LDD4|ARAP1_MOUSE Arf-GAP with Rho-GAP domain, ANK repeat and PH domain-containing protein 1 OS=Mus musculus OX=10090 GN=Arap1 PE=1 SV=2;sp|Q4LDD4-2|ARAP1_MOUSE Isoform 2 of Arf-GAP with Rho-GAP domain, ANK repeat and PH domain-containing protein 1 OS=	Q4LDD4;Q4LDD4-2;Q4LDD4-3	Arf-GAP with Rho-GAP domain, ANK repeat and PH domain-containing protein 1	Arap1	977	1122	1224	388	984	728	1273	1700		956	1250	1795	1462	1777	1972	2008	2217	1361		high	37	37	37.3
	sp|Q8BZ05|ARAP2_MOUSE Arf-GAP with Rho-GAP domain, ANK repeat and PH domain-containing protein 2 OS=Mus musculus OX=10090 GN=Arap2 PE=1 SV=2	Q8BZ05;Q8BZ05-2	Arf-GAP with Rho-GAP domain, ANK repeat and PH domain-containing protein 2	Arap2	49	18	17	485	344	789	299	841		32	92	0	269	240	158	251	326	92		high	12	12	9
	sp|Q5XJY5|COPD_MOUSE Coatomer subunit delta OS=Mus musculus OX=10090 GN=Arcn1 PE=1 SV=2	Q5XJY5	Coatomer subunit delta	Arcn1	36718	37789	38710	257570	272761	222800	188846	229957		42391	48814	47825	314102	259146	364326	247943	309834	311007		high	35	35	62.4
	sp|Q8CHG5|AREL1_MOUSE Apoptosis-resistant E3 ubiquitin protein ligase 1 OS=Mus musculus OX=10090 GN=Arel1 PE=1 SV=2	Q8CHG5	Apoptosis-resistant E3 ubiquitin protein ligase 1	Arel1	0	0	0	289	278	214	0	1507		0	0	0	0	0	176	0	0	227		medium	3	3	6
	sp|P84078|ARF1_MOUSE ADP-ribosylation factor 1 OS=Mus musculus OX=10090 GN=Arf1 PE=1 SV=2;sp|P61205|ARF3_MOUSE ADP-ribosylation factor 3 OS=Mus musculus OX=10090 GN=Arf3 PE=2 SV=2	P84078;P61205	ADP-ribosylation factor 1;ADP-ribosylation factor 3	Arf1;Arf3	271994	243759	249469	2259416	2399550	1632255	1279403	1956599		548520	409015	385213	2455142	2192520	2552427	1722051	1863611	1508203		low	14	4	70.7
	sp|Q8BSL7|ARF2_MOUSE ADP-ribosylation factor 2 OS=Mus musculus OX=10090 GN=Arf2 PE=1 SV=2	Q8BSL7	ADP-ribosylation factor 2	Arf2	259	0	0	0	0	4253	0	3441		448	384	1314	5021	3996	3386	3609	0	0		low	2	2	65.7
	sp|P61750|ARF4_MOUSE ADP-ribosylation factor 4 OS=Mus musculus OX=10090 GN=Arf4 PE=1 SV=2	P61750	ADP-ribosylation factor 4	Arf4	16121	13961	12298	232965	200862	178020	29992	204497		15054	18418	20062	197214	161445	245384	140599	171451	197437		medium	3	3	54.4
	sp|P84084|ARF5_MOUSE ADP-ribosylation factor 5 OS=Mus musculus OX=10090 GN=Arf5 PE=1 SV=2	P84084	ADP-ribosylation factor 5	Arf5	41225	18998	39921	358388	372586	244695	217954	314283		37161	62941	67852	289291	325654	320562	156049	279993	237206		high	8	7	81.7
	sp|P62331|ARF6_MOUSE ADP-ribosylation factor 6 OS=Mus musculus OX=10090 GN=Arf6 PE=1 SV=2	P62331	ADP-ribosylation factor 6	Arf6	9485	6861	8365	165306	172031	177496	155661	138897		15427	10996	7225	174013	156507	196862	205545	200455	243358		high	12	12	78.3
	sp|Q9EPJ9|ARFG1_MOUSE ADP-ribosylation factor GTPase-activating protein 1 OS=Mus musculus OX=10090 GN=Arfgap1 PE=1 SV=2;sp|Q9EPJ9-2|ARFG1_MOUSE Isoform 2 of ADP-ribosylation factor GTPase-activating protein 1 OS=Mus musculus OX=10090 GN=Arfgap1	Q9EPJ9;Q9EPJ9-2	ADP-ribosylation factor GTPase-activating protein 1	Arfgap1	2894	3570	2640	31358	26430	23511	9709	18281		1817	3702	4942	55455	57676	81661	44014	56464	27475		high	18	18	58.2
	sp|Q99K28|ARFG2_MOUSE ADP-ribosylation factor GTPase-activating protein 2 OS=Mus musculus OX=10090 GN=Arfgap2 PE=1 SV=1;sp|Q99K28-2|ARFG2_MOUSE Isoform 2 of ADP-ribosylation factor GTPase-activating protein 2 OS=Mus musculus OX=10090 GN=Arfgap2	Q99K28;Q99K28-2	ADP-ribosylation factor GTPase-activating protein 2	Arfgap2	4875	7667	7832	77634	51560	68347	52433	61147		9906	12042	10224	90773	68027	118031	73559	87829	81188		high	30	29	61.9
	sp|Q9D8S3|ARFG3_MOUSE ADP-ribosylation factor GTPase-activating protein 3 OS=Mus musculus OX=10090 GN=Arfgap3 PE=1 SV=2	Q9D8S3	ADP-ribosylation factor GTPase-activating protein 3	Arfgap3	723	7889	8658	0	939	0	397	0		458	5075	8685	2230	0	1691	1527	1285	1397		medium	7	7	25.2
	sp|G3X9K3|BIG1_MOUSE Brefeldin A-inhibited guanine nucleotide-exchange protein 1 OS=Mus musculus OX=10090 GN=Arfgef1 PE=1 SV=1	G3X9K3	Brefeldin A-inhibited guanine nucleotide-exchange protein 1	Arfgef1	462	1384	1245	8676	7662	3764	4878	8332		378	780	1460	6556	5042	6462	6080	6673	3909		medium	55	38	36.6
	sp|A2A5R2|BIG2_MOUSE Brefeldin A-inhibited guanine nucleotide-exchange protein 2 OS=Mus musculus OX=10090 GN=Arfgef2 PE=1 SV=1	A2A5R2	Brefeldin A-inhibited guanine nucleotide-exchange protein 2	Arfgef2	337	354	504	3339	2438	2764	3161	3461		221	363	684	2806	3941	5077	3371	5344	2802		high	31	31	33.3
	tr|G5E8V9|G5E8V9_MOUSE ADP-ribosylation factor-interacting protein 1 OS=Mus musculus OX=10090 GN=Arfip1 PE=1 SV=1;tr|E9Q3G5|E9Q3G5_MOUSE ADP-ribosylation factor interacting protein 1 OS=Mus musculus OX=10090 GN=Arfip1 PE=1 SV=1	G5E8V9;E9Q3G5		Arfip1	2578	2410	4029	42891	33976	40830	25733	47344		2504	6050	3451	55836	63517	70700	50143	44322	54446		low	17	2	57.4
	tr|A2RSX9|A2RSX9_MOUSE ADP-ribosylation factor interacting protein 1 OS=Mus musculus OX=10090 GN=Arfip1 PE=1 SV=1	A2RSX9		Arfip1	0	0	0	0	0	3145	3078	0		0	0	0	6715	7269	7409	4874	5724	5161		low	1	1	54.8
	sp|Q8K221|ARFP2_MOUSE Arfaptin-2 OS=Mus musculus OX=10090 GN=Arfip2 PE=1 SV=2	Q8K221	Arfaptin-2	Arfip2	0	0	0	0	0	715	2079	2799		0	0	0	4648	6275	7388	1743	5485	3351		medium	7	7	25.5
	sp|Q8BXL7|ARFRP_MOUSE ADP-ribosylation factor-related protein 1 OS=Mus musculus OX=10090 GN=Arfrp1 PE=1 SV=2	Q8BXL7	ADP-ribosylation factor-related protein 1	Arfrp1	1267	1254	1961	39111	35466	39116	38849	33601		2762	3154	2951	40477	37782	25286	31102	24950	37872		high	10	10	66.7
	sp|Q3UL36|ARGL1_MOUSE Arginine and glutamate-rich protein 1 OS=Mus musculus OX=10090 GN=Arglu1 PE=1 SV=2;sp|Q3UL36-2|ARGL1_MOUSE Isoform 2 of Arginine and glutamate-rich protein 1 OS=Mus musculus OX=10090 GN=Arglu1	Q3UL36;Q3UL36-2	Arginine and glutamate-rich protein 1	Arglu1	21629	26728	9623	96951	80983	59883	10061	67237		31538	24941	25345	118529	103571	80587	89007	111985	66114		high	12	12	27.3
	sp|Q5FWK3|RHG01_MOUSE Rho GTPase-activating protein 1 OS=Mus musculus OX=10090 GN=Arhgap1 PE=1 SV=1	Q5FWK3	Rho GTPase-activating protein 1	Arhgap1	28381	41704	55340	251067	201982	187732	201416	215570		35279	39705	42249	166617	196022	204097	149101	146068	96957		high	24	24	67
	sp|Q6Y5D8-3|RHG10_MOUSE Isoform 3 of Rho GTPase-activating protein 10 OS=Mus musculus OX=10090 GN=Arhgap10;sp|Q6Y5D8|RHG10_MOUSE Rho GTPase-activating protein 10 OS=Mus musculus OX=10090 GN=Arhgap10 PE=1 SV=2;sp|Q6Y5D8-4|RHG10_MOUSE Isoform 4 of Rho GTPase	Q6Y5D8-3;Q6Y5D8;Q6Y5D8-4;Q6Y5D8-2	Rho GTPase-activating protein 10	Arhgap10	306	353	136	0	0	244	0	0		235	207	278	428	0	885	0	298	0		high	9	8	12.7
	sp|Q80Y19|RHGBA_MOUSE Rho GTPase-activating protein 11A OS=Mus musculus OX=10090 GN=Arhgap11a PE=1 SV=2	Q80Y19	Rho GTPase-activating protein 11A	Arhgap11a	0	0	0	4650	3371	3415	1492	207		0	0	0	5186	4278	5740	3207	7260	4680		high	25	25	36.7
	sp|Q8C0D4|RHG12_MOUSE Rho GTPase-activating protein 12 OS=Mus musculus OX=10090 GN=Arhgap12 PE=1 SV=2	Q8C0D4	Rho GTPase-activating protein 12	Arhgap12	546	566	619	649	1117	705	1108	1113		501	542	723	1039	1460	780	1142	615	795		high	14	14	21.4
	sp|Q811M1|RHG15_MOUSE Rho GTPase-activating protein 15 OS=Mus musculus OX=10090 GN=Arhgap15 PE=1 SV=1;sp|Q811M1-2|RHG15_MOUSE Isoform 2 of Rho GTPase-activating protein 15 OS=Mus musculus OX=10090 GN=Arhgap15	Q811M1;Q811M1-2;Q811M1-3;Q811M1-4	Rho GTPase-activating protein 15	Arhgap15	25187	29387	24131	31200	40200	14106	24733	28137		26324	29852	30548	27848	23049	39379	32207	25298	26338		high	27	26	62.8
	sp|Q3UIA2|RHG17_MOUSE Rho GTPase-activating protein 17 OS=Mus musculus OX=10090 GN=Arhgap17 PE=1 SV=1;sp|Q3UIA2-2|RHG17_MOUSE Isoform 2 of Rho GTPase-activating protein 17 OS=Mus musculus OX=10090 GN=Arhgap17;sp|Q3UIA2-4|RHG17_MOUSE Isoform 4 of Rho GTPase	Q3UIA2;Q3UIA2-2;Q3UIA2-4;Q3UIA2-3;Q5SSM3-2;Q5SSM3-3;Q5SSM3	Rho GTPase-activating protein 17	Arhgap17	597	842	1106	14966	8655	6293	7080	13250		1052	2048	1275	14394	12588	12405	7758	16567	10168		high	28	28	48.2
	sp|Q8K0Q5|RHG18_MOUSE Rho GTPase-activating protein 18 OS=Mus musculus OX=10090 GN=Arhgap18 PE=1 SV=1	Q8K0Q5	Rho GTPase-activating protein 18	Arhgap18	268	352	280	1457	651	395	409	0		509	361	380	457	145	571	114	0	0		high	13	13	28.5
	sp|Q8BYW1|RHG25_MOUSE Rho GTPase-activating protein 25 OS=Mus musculus OX=10090 GN=Arhgap25 PE=1 SV=2;sp|Q8BYW1-3|RHG25_MOUSE Isoform 3 of Rho GTPase-activating protein 25 OS=Mus musculus OX=10090 GN=Arhgap25;sp|Q8BYW1-2|RHG25_MOUSE Isoform 2 of Rho GTPase	Q8BYW1;Q8BYW1-3;Q8BYW1-2	Rho GTPase-activating protein 25	Arhgap25	7174	10807	14721	25597	21497	26302	10345	23473		12276	14243	12595	13857	8634	17332	8813	16830	8004		high	36	36	63.1
	sp|Q6ZQ82|RHG26_MOUSE Rho GTPase-activating protein 26 OS=Mus musculus OX=10090 GN=Arhgap26 PE=1 SV=3	Q6ZQ82	Rho GTPase-activating protein 26	Arhgap26	29	51	74	0	0	0	0	0		347	680	774	0	0	0	148	0	0		medium	7	7	11.9
	sp|A2AB59-2|RHG27_MOUSE Isoform 2 of Rho GTPase-activating protein 27 OS=Mus musculus OX=10090 GN=Arhgap27;sp|A2AB59|RHG27_MOUSE Rho GTPase-activating protein 27 OS=Mus musculus OX=10090 GN=Arhgap27 PE=1 SV=1	A2AB59-2;A2AB59	Rho GTPase-activating protein 27	Arhgap27	4244	4412	3982	5028	1611	2167	4850	2709		6055	6719	5742	5831	9027	4047	6670	3722	2725		high	26	26	49
	sp|Q640N3-2|RHG30_MOUSE Isoform 2 of Rho GTPase-activating protein 30 OS=Mus musculus OX=10090 GN=Arhgap30;sp|Q640N3|RHG30_MOUSE Rho GTPase-activating protein 30 OS=Mus musculus OX=10090 GN=Arhgap30 PE=1 SV=3	Q640N3-2;Q640N3	Rho GTPase-activating protein 30	Arhgap30	6734	9566	18191	11543	16530	11535	8536	15143		10737	15437	15219	21666	16486	20645	17029	15933	15341		high	39	38	46.4
	sp|A6X8Z5|RHG31_MOUSE Rho GTPase-activating protein 31 OS=Mus musculus OX=10090 GN=Arhgap31 PE=1 SV=1	A6X8Z5	Rho GTPase-activating protein 31	Arhgap31	85	74	56	1257	3150	404	1019	3204		112	42	43	847	0	513	620	767	852		high	9	9	8.4
	tr|B1AUX5|B1AUX5_MOUSE Rho GTPase-activating protein 4 OS=Mus musculus OX=10090 GN=Arhgap4 PE=1 SV=1;tr|Q80Z68|Q80Z68_MOUSE Rho GTPase-activating protein 4 OS=Mus musculus OX=10090 GN=Arhgap4 PE=1 SV=1;tr|B1AUY3|B1AUY3_MOUSE Rho GTPase-activating protein 4	B1AUX5;Q80Z68;B1AUY3;B1AUY2;Q3TE27;E9PYS6;E9Q4R3;F6SL55;F6YWG4;B1AUY1;D6RFT8		Arhgap4	11133	16722	15320	21418	25832	18005	12764	20813		14354	18399	16121	12155	11253	14908	15104	17248	9706		high	48	48	62.4
	sp|P97393|RHG05_MOUSE Rho GTPase-activating protein 5 OS=Mus musculus OX=10090 GN=Arhgap5 PE=1 SV=2	P97393	Rho GTPase-activating protein 5	Arhgap5	69	177	93	430	258	446	503	429		0	0	0	0	580	490	416	516	833		high	12	12	10.9
	tr|Q1HDU4|Q1HDU4_MOUSE ArhGAP9 OS=Mus musculus OX=10090 GN=Arhgap9 PE=1 SV=1	Q1HDU4		Arhgap9	7355	7026	9122	18522	16085	11681	8373	18499		6728	5831	4855	18998	8723	6955	11092	14992	5390		low	23	3	41.4
	sp|Q99PT1|GDIR1_MOUSE Rho GDP-dissociation inhibitor 1 OS=Mus musculus OX=10090 GN=Arhgdia PE=1 SV=3	Q99PT1	Rho GDP-dissociation inhibitor 1	Arhgdia	902275	1017543	1115965	5023608	3616897	3492184	3702477	4359427		1330684	1499263	1395554	5413284	5354200	3895120	3897426	5426451	3268308		high	18	18	77.5
	sp|Q61599|GDIR2_MOUSE Rho GDP-dissociation inhibitor 2 OS=Mus musculus OX=10090 GN=Arhgdib PE=1 SV=3	Q61599	Rho GDP-dissociation inhibitor 2	Arhgdib	1164054	1399739	1773362	4164016	4337228	3978463	4230123	4792882		1755033	2740178	2273507	3709948	3980019	3454796	2677773	3608453	2501298		high	25	25	85.5
	sp|Q61210-5|ARHG1_MOUSE Isoform 5 of Rho guanine nucleotide exchange factor 1 OS=Mus musculus OX=10090 GN=Arhgef1;sp|Q61210-2|ARHG1_MOUSE Isoform 2 of Rho guanine nucleotide exchange factor 1 OS=Mus musculus OX=10090 GN=Arhgef1;sp|Q61210|ARHG1_MOUSE Rho gu	Q61210-5;Q61210-2;Q61210;Q61210-4;Q61210-3	Rho guanine nucleotide exchange factor 1	Arhgef1	61504	97098	102728	347572	244845	191011	157341	226040		82902	100016	98220	265998	260683	309350	218910	233569	152074		high	66	66	67.3
	tr|E9Q0A3|E9Q0A3_MOUSE Rho guanine nucleotide exchange factor (GEF) 11 (Fragment) OS=Mus musculus OX=10090 GN=Arhgef11 PE=1 SV=8	E9Q0A3;A0A1D5RLI4		Arhgef11	304	293	330	0	0	0	0	0		78	30	69	0	0	0	0	0	0		low	15	1	15.3
	sp|Q6P9R4|ARHGI_MOUSE Rho guanine nucleotide exchange factor 18 OS=Mus musculus OX=10090 GN=Arhgef18 PE=1 SV=3;sp|Q6P9R4-1|ARHGI_MOUSE Isoform 2 of Rho guanine nucleotide exchange factor 18 OS=Mus musculus OX=10090 GN=Arhgef18;sp|Q6P9R4-2|ARHGI_MOUSE Isofo	Q6P9R4;Q6P9R4-1;Q6P9R4-2;Q6P9R4-3;P97433-2	Rho guanine nucleotide exchange factor 18	Arhgef18	2874	5216	3468	4017	2831	2616	1305	4790		4223	4005	4453	1308	0	711	1268	921	943		high	49	48	47.4
	sp|Q60875-5|ARHG2_MOUSE Isoform 5 of Rho guanine nucleotide exchange factor 2 OS=Mus musculus OX=10090 GN=Arhgef2;sp|Q60875-4|ARHG2_MOUSE Isoform 4 of Rho guanine nucleotide exchange factor 2 OS=Mus musculus OX=10090 GN=Arhgef2;sp|Q60875|ARHG2_MOUSE Rho gu	Q60875-5;Q60875-4;Q60875;Q60875-3;Q60875-2	Rho guanine nucleotide exchange factor 2	Arhgef2	6505	8244	7399	98115	62767	62881	59917	60861		7120	8540	8923	104307	102694	108130	78753	95991	55532		high	59	59	64.9
	sp|Q91X46|ARHG3_MOUSE Rho guanine nucleotide exchange factor 3 OS=Mus musculus OX=10090 GN=Arhgef3 PE=1 SV=1;sp|Q91X46-3|ARHG3_MOUSE Isoform 3 of Rho guanine nucleotide exchange factor 3 OS=Mus musculus OX=10090 GN=Arhgef3;sp|Q91X46-2|ARHG3_MOUSE Isoform 2	Q91X46;Q91X46-3;Q91X46-2	Rho guanine nucleotide exchange factor 3	Arhgef3	1444	259	279	5330	4604	474	363	352		89	158	138	9210	465	10038	13464	30717	33512		medium	7	6	20
	sp|Q8K4I3|ARHG6_MOUSE Rho guanine nucleotide exchange factor 6 OS=Mus musculus OX=10090 GN=Arhgef6 PE=1 SV=1	Q8K4I3	Rho guanine nucleotide exchange factor 6	Arhgef6	18844	28700	23771	55511	47815	34384	33980	44057		26915	38482	38109	34794	28760	53390	26945	41234	32454		high	46	43	72.1
	sp|Q9ES28-8|ARHG7_MOUSE Isoform H of Rho guanine nucleotide exchange factor 7 OS=Mus musculus OX=10090 GN=Arhgef7	Q9ES28-8	Rho guanine nucleotide exchange factor 7	Arhgef7	5679	4367	4907	27399	17289	20628	17072	23988		8603	7056	7358	30631	30074	24245	19464	46891	19670		low	33	2	52.9
	sp|A2BH40|ARI1A_MOUSE AT-rich interactive domain-containing protein 1A OS=Mus musculus OX=10090 GN=Arid1a PE=1 SV=1;sp|A2BH40-3|ARI1A_MOUSE Isoform 3 of AT-rich interactive domain-containing protein 1A OS=Mus musculus OX=10090 GN=Arid1a	A2BH40;A2BH40-3	AT-rich interactive domain-containing protein 1A	Arid1a	1651	2815	2492	19756	10383	9356	12311	12881		1815	2791	3228	12445	13373	13587	10715	16023	10223		low	54	5	32
	sp|A2BH40-4|ARI1A_MOUSE Isoform 4 of AT-rich interactive domain-containing protein 1A OS=Mus musculus OX=10090 GN=Arid1a;sp|A2BH40-2|ARI1A_MOUSE Isoform 2 of AT-rich interactive domain-containing protein 1A OS=Mus musculus OX=10090 GN=Arid1a	A2BH40-4;A2BH40-2	AT-rich interactive domain-containing protein 1A	Arid1a	0	0	0	64	29	0	0	68		0	0	0	0	49	56	0	119	33		low	1	1	33.5
	sp|E9Q4N7|ARI1B_MOUSE AT-rich interactive domain-containing protein 1B OS=Mus musculus OX=10090 GN=Arid1b PE=1 SV=1	E9Q4N7		Arid1b	458	756	696	1509	769	1782	1706	871		254	503	741	688	1610	338	425	1228	562		high	30	30	20.1
	sp|E9Q7E2|ARID2_MOUSE AT-rich interactive domain-containing protein 2 OS=Mus musculus OX=10090 GN=Arid2 PE=1 SV=1	E9Q7E2		Arid2	242	632	546	7683	4649	4052	4618	2948		162	226	243	4015	5127	6175	4121	3856	1849		high	30	30	25.2
	sp|Q62431|ARI3A_MOUSE AT-rich interactive domain-containing protein 3A OS=Mus musculus OX=10090 GN=Arid3a PE=1 SV=1	Q62431	AT-rich interactive domain-containing protein 3A	Arid3a	0	0	0	675	535	0	485	316		0	0	0	396	399	266	0	654	725		medium	5	5	12
	sp|F8VPQ2|ARI4A_MOUSE AT-rich interactive domain-containing protein 4A OS=Mus musculus OX=10090 GN=Arid4a PE=1 SV=1	F8VPQ2		Arid4a	2835	2937	3467	8332	4012	4692	5636	6638		3201	5231	4834	5187	7264	6474	7027	2334	3631		high	36	34	44.1
	sp|A2CG63|ARI4B_MOUSE AT-rich interactive domain-containing protein 4B OS=Mus musculus OX=10090 GN=Arid4b PE=1 SV=1;sp|A2CG63-2|ARI4B_MOUSE Isoform 2 of AT-rich interactive domain-containing protein 4B OS=Mus musculus OX=10090 GN=Arid4b	A2CG63;A2CG63-2	AT-rich interactive domain-containing protein 4B	Arid4b	794	1109	1076	4169	3749	2868	3665	3574		948	1797	1592	5814	4448	4326	4747	4074	2959		high	29	29	30.7
	sp|Q3U108|ARI5A_MOUSE AT-rich interactive domain-containing protein 5A OS=Mus musculus OX=10090 GN=Arid5a PE=1 SV=1;sp|Q3U108-2|ARI5A_MOUSE Isoform 2 of AT-rich interactive domain-containing protein 5A OS=Mus musculus OX=10090 GN=Arid5a;sp|Q3U108-3|ARI5A_M	Q3U108;Q3U108-2;Q3U108-3;Q3U108-4;Q3U108-5	AT-rich interactive domain-containing protein 5A	Arid5a	154	0	0	2658	1378	1068	1086	1445		64	0	0	4145	5132	2752	1449	6166	1408		high	12	12	35.1
	sp|Q8BM75|ARI5B_MOUSE AT-rich interactive domain-containing protein 5B OS=Mus musculus OX=10090 GN=Arid5b PE=1 SV=3;sp|Q8BM75-2|ARI5B_MOUSE Isoform 2 of AT-rich interactive domain-containing protein 5B OS=Mus musculus OX=10090 GN=Arid5b	Q8BM75;Q8BM75-2	AT-rich interactive domain-containing protein 5B	Arid5b	0	0	0	0	196	191	767	376		0	0	0	387	809	1289	261	0	0		high	9	9	11.7
	sp|Q9Z1K5|ARI1_MOUSE E3 ubiquitin-protein ligase ARIH1 OS=Mus musculus OX=10090 GN=Arih1 PE=1 SV=3	Q9Z1K5	E3 ubiquitin-protein ligase ARIH1	Arih1	7641	9065	8062	66314	70594	60485	31173	59072		10931	12696	17140	85070	86613	89069	58785	69339	72622		high	22	22	53.3
	sp|Q9Z1K6|ARI2_MOUSE E3 ubiquitin-protein ligase ARIH2 OS=Mus musculus OX=10090 GN=Arih2 PE=1 SV=1	Q9Z1K6	E3 ubiquitin-protein ligase ARIH2	Arih2	1977	2004	2236	7426	10508	7276	6782	13126		1644	2795	2178	12380	11036	12679	8570	14673	8690		high	15	15	38.6
	sp|P61211|ARL1_MOUSE ADP-ribosylation factor-like protein 1 OS=Mus musculus OX=10090 GN=Arl1 PE=1 SV=1	P61211	ADP-ribosylation factor-like protein 1	Arl1	13992	18880	18642	122778	127069	102996	99967	128562		17741	20268	33820	117224	141260	206039	93766	56682	97902		high	9	9	72.9
	sp|Q8BIX3|AL14E_MOUSE ARL14 effector protein OS=Mus musculus OX=10090 GN=Arl14ep PE=1 SV=1	Q8BIX3;Q8BIX3-2	ARL14 effector protein	Arl14ep	2420	3073	1566	22461	7667	4505	13125	13168		1044	5943	3784	23207	20276	1803	22838	11980	25851		high	11	11	50
	sp|Q9D0J4|ARL2_MOUSE ADP-ribosylation factor-like protein 2 OS=Mus musculus OX=10090 GN=Arl2 PE=1 SV=1	Q9D0J4	ADP-ribosylation factor-like protein 2	Arl2	1264	975	2136	42389	36084	38411	32352	45213		920	1726	1987	43353	22174	36768	45453	45236	36180		high	9	9	56.5
	sp|Q9D385-2|AR2BP_MOUSE Isoform 2 of ADP-ribosylation factor-like protein 2-binding protein OS=Mus musculus OX=10090 GN=Arl2bp;sp|Q9D385|AR2BP_MOUSE ADP-ribosylation factor-like protein 2-binding protein OS=Mus musculus OX=10090 GN=Arl2bp PE=1 SV=1	Q9D385-2;Q9D385	ADP-ribosylation factor-like protein 2-binding protein	Arl2bp	0	0	577	1589	0	983	0	1831		0	975	307	2484	0	1717	0	5453	692		medium	4	4	34.2
	sp|Q9WUL7|ARL3_MOUSE ADP-ribosylation factor-like protein 3 OS=Mus musculus OX=10090 GN=Arl3 PE=1 SV=1	Q9WUL7	ADP-ribosylation factor-like protein 3	Arl3	1353	1712	4188	96897	75954	55139	51659	62914		12001	8738	11073	138181	122258	116738	129867	140569	67619		high	9	9	56
	sp|P61208|ARL4C_MOUSE ADP-ribosylation factor-like protein 4C OS=Mus musculus OX=10090 GN=Arl4c PE=2 SV=1	P61208	ADP-ribosylation factor-like protein 4C	Arl4c	522	0	153	0	0	0	0	0		677	803	251	0	0	0	0	0	0		medium	3	3	24
	sp|Q80ZU0|ARL5A_MOUSE ADP-ribosylation factor-like protein 5A OS=Mus musculus OX=10090 GN=Arl5a PE=1 SV=1	Q80ZU0;Q6P068	ADP-ribosylation factor-like protein 5A	Arl5a	837	553	716	4918	685	1508	5903	1491		714	1158	1117	7170	6972	10468	5977	7345	8798		medium	4	3	24
	sp|O88848|ARL6_MOUSE ADP-ribosylation factor-like protein 6 OS=Mus musculus OX=10090 GN=Arl6 PE=1 SV=1;sp|O88848-2|ARL6_MOUSE Isoform 2 of ADP-ribosylation factor-like protein 6 OS=Mus musculus OX=10090 GN=Arl6	O88848;O88848-2	ADP-ribosylation factor-like protein 6	Arl6	0	0	0	3968	0	0	3986	0		0	0	0	811	2307	3514	3772	0	3189		medium	4	4	31.2
	sp|Q9JKW0|AR6P1_MOUSE ADP-ribosylation factor-like protein 6-interacting protein 1 OS=Mus musculus OX=10090 GN=Arl6ip1 PE=1 SV=1	Q9JKW0	ADP-ribosylation factor-like protein 6-interacting protein 1	Arl6ip1	2207	6941	3104	15785	0	28409	0	6069		6393	7506	12498	25787	0	30121	23492	11413	4429		low	2	2	8.9
	sp|Q9JM93|AR6P4_MOUSE ADP-ribosylation factor-like protein 6-interacting protein 4 OS=Mus musculus OX=10090 GN=Arl6ip4 PE=1 SV=1	Q9JM93	ADP-ribosylation factor-like protein 6-interacting protein 4	Arl6ip4	8999	8068	8765	9565	7608	16968	2472	13664		11717	6826	14247	13147	12847	6681	5046	8549	4473		medium	4	4	24.9
	sp|Q8R5J9|PRAF3_MOUSE PRA1 family protein 3 OS=Mus musculus OX=10090 GN=Arl6ip5 PE=1 SV=2	Q8R5J9	PRA1 family protein 3	Arl6ip5	50199	54228	41027	116791	135678	112701	141192	191937		97535	102939	79581	190737	174560	199148	128401	185655	230985		medium	6	6	28.7
	sp|Q8BH07|AR6P6_MOUSE ADP-ribosylation factor-like protein 6-interacting protein 6 OS=Mus musculus OX=10090 GN=Arl6ip6 PE=1 SV=1	Q8BH07	ADP-ribosylation factor-like protein 6-interacting protein 6	Arl6ip6	657	238	3057	3037	8497	972	9097	10676		481	6110	6430	4174	8044	12508	4817	14503	2689		medium	6	6	32.7
	sp|Q8VEH3|ARL8A_MOUSE ADP-ribosylation factor-like protein 8A OS=Mus musculus OX=10090 GN=Arl8a PE=1 SV=1	Q8VEH3	ADP-ribosylation factor-like protein 8A	Arl8a	2917	3858	5517	33877	47141	39725	19166	6329		2172	6215	7476	39178	16968	30776	58081	14904	35048		medium	4	4	61.3
	sp|Q9CQW2|ARL8B_MOUSE ADP-ribosylation factor-like protein 8B OS=Mus musculus OX=10090 GN=Arl8b PE=1 SV=1	Q9CQW2	ADP-ribosylation factor-like protein 8B	Arl8b	21671	26887	23312	385916	345221	249790	249684	334665		24959	30821	42912	461288	582229	775291	373261	424348	292023		low	14	6	68.8
	sp|Q9D7A8|ARMC1_MOUSE Armadillo repeat-containing protein 1 OS=Mus musculus OX=10090 GN=Armc1 PE=1 SV=1	Q9D7A8	Armadillo repeat-containing protein 1	Armc1	225	264	1108	73079	48787	54514	19993	42042		2096	1999	2159	48052	58717	76677	59019	47970	40683		high	13	13	63.1
	sp|Q9D0L7|ARM10_MOUSE Armadillo repeat-containing protein 10 OS=Mus musculus OX=10090 GN=Armc10 PE=1 SV=1;sp|Q9D0L7-2|ARM10_MOUSE Isoform 2 of Armadillo repeat-containing protein 10 OS=Mus musculus OX=10090 GN=Armc10	Q9D0L7;Q9D0L7-2	Armadillo repeat-containing protein 10	Armc10	8010	7007	10705	90093	101431	142431	71271	106159		11261	9525	11815	106350	106956	87136	113316	80162	58257		high	13	13	47.7
	sp|Q5EBP3|ARMC5_MOUSE Armadillo repeat-containing protein 5 OS=Mus musculus OX=10090 GN=Armc5 PE=2 SV=1	Q5EBP3	Armadillo repeat-containing protein 5	Armc5	0	0	0	364	0	628	0	321		0	0	0	991	983	608	856	0	435		medium	6	6	11.6
	sp|Q8BNU0|ARMC6_MOUSE Armadillo repeat-containing protein 6 OS=Mus musculus OX=10090 GN=Armc6 PE=1 SV=1;sp|Q8BNU0-2|ARMC6_MOUSE Isoform 2 of Armadillo repeat-containing protein 6 OS=Mus musculus OX=10090 GN=Armc6	Q8BNU0;Q8BNU0-2	Armadillo repeat-containing protein 6	Armc6	698	971	1321	22583	13922	7275	16477	10186		1793	1551	1821	41215	41336	52534	38555	29893	19545		high	14	14	42.9
	sp|Q9DBR3|ARMC8_MOUSE Armadillo repeat-containing protein 8 OS=Mus musculus OX=10090 GN=Armc8 PE=1 SV=2;sp|Q9DBR3-2|ARMC8_MOUSE Isoform 2 of Armadillo repeat-containing protein 8 OS=Mus musculus OX=10090 GN=Armc8	Q9DBR3;Q9DBR3-2	Armadillo repeat-containing protein 8	Armc8	1269	1627	3223	32510	26197	12504	23953	20681		1630	2931	2609	27406	25094	27953	22741	33273	18686		medium	28	14	47.4
	sp|Q9D2I5-2|ARMC9_MOUSE Isoform 2 of LisH domain-containing protein ARMC9 OS=Mus musculus OX=10090 GN=Armc9;sp|Q9D2I5-4|ARMC9_MOUSE Isoform 4 of LisH domain-containing protein ARMC9 OS=Mus musculus OX=10090 GN=Armc9;sp|Q9D2I5-5|ARMC9_MOUSE Isoform 5 of Lis	Q9D2I5-2;Q9D2I5-4;Q9D2I5-5;Q9D2I5;Q9D2I5-3;Q9D2I5-9;Q9D2I5-8;Q9D2I5-7	LisH domain-containing protein ARMC9	Armc9	0	0	0	423	460	256	0	0		0	0	0	216	347	353	535	593	367		medium	3	3	5.6
	sp|Q8BHS6|ARMX3_MOUSE Armadillo repeat-containing X-linked protein 3 OS=Mus musculus OX=10090 GN=Armcx3 PE=1 SV=1	Q8BHS6	Armadillo repeat-containing X-linked protein 3	Armcx3	0	0	0	0	0	0	620	205		0	261	0	871	0	0	487	0	0		low	2	2	8.4
	sp|A6H630|ARMT1_MOUSE Damage-control phosphatase ARMT1 OS=Mus musculus OX=10090 GN=Armt1 PE=1 SV=1;sp|A6H630-2|ARMT1_MOUSE Isoform 2 of Damage-control phosphatase ARMT1 OS=Mus musculus OX=10090 GN=Armt1	A6H630;A6H630-2;A6H630-4;A6H630-3	Protein-glutamate O-methyltransferase	Armt1	3021	2273	4021	12725	10798	13505	6336	13557		3422	5933	5091	13889	17834	13137	6106	20758	12452		high	18	18	52.6
	sp|P53762-2|ARNT_MOUSE Isoform Short of Aryl hydrocarbon receptor nuclear translocator OS=Mus musculus OX=10090 GN=Arnt;sp|P53762|ARNT_MOUSE Aryl hydrocarbon receptor nuclear translocator OS=Mus musculus OX=10090 GN=Arnt PE=1 SV=3	P53762-2;P53762	Aryl hydrocarbon receptor nuclear translocator	Arnt	480	664	831	4257	2408	1361	1104	2591		492	324	367	5081	5599	5048	3358	4924	3144		high	16	16	37.7
	sp|Q9R0Q6|ARC1A_MOUSE Actin-related protein 2/3 complex subunit 1A OS=Mus musculus OX=10090 GN=Arpc1a PE=1 SV=1	Q9R0Q6	Actin-related protein 2/3 complex subunit 1A	Arpc1a	8752	10419	9327	36508	35038	24210	11213	25568		5629	6237	7027	31959	53294	28804	13276	19947	18696		high	20	20	63
	sp|Q9WV32|ARC1B_MOUSE Actin-related protein 2/3 complex subunit 1B OS=Mus musculus OX=10090 GN=Arpc1b PE=1 SV=4	Q9WV32	Actin-related protein 2/3 complex subunit 1B	Arpc1b	497915	571940	516610	1685803	1780266	1359513	1199147	999175		907145	767501	808391	1778070	1832360	2263547	1752159	1643317	1272937		high	30	27	67.2
	sp|Q9CVB6|ARPC2_MOUSE Actin-related protein 2/3 complex subunit 2 OS=Mus musculus OX=10090 GN=Arpc2 PE=1 SV=3	Q9CVB6	Actin-related protein 2/3 complex subunit 2	Arpc2	587497	555707	567885	2264880	1460671	1113717	1128392	1713430		594755	819837	798687	1476518	1310708	1582486	1790116	1099596	908585		high	30	30	80
	sp|Q9JM76|ARPC3_MOUSE Actin-related protein 2/3 complex subunit 3 OS=Mus musculus OX=10090 GN=Arpc3 PE=1 SV=3	Q9JM76	Actin-related protein 2/3 complex subunit 3	Arpc3	4987	8787	5536	45694	12342	29136	46319	18399		31411	25437	35462	150518	68572	38137	38841	53847	24232		high	8	8	37.1
	sp|P59999|ARPC4_MOUSE Actin-related protein 2/3 complex subunit 4 OS=Mus musculus OX=10090 GN=Arpc4 PE=1 SV=3	P59999	Actin-related protein 2/3 complex subunit 4	Arpc4	212090	238267	341560	1238492	1140489	1018872	1083487	1256834		364404	396429	396642	1017671	1062748	2074516	872552	896846	1217781		high	15	15	75.6
	sp|Q9CPW4|ARPC5_MOUSE Actin-related protein 2/3 complex subunit 5 OS=Mus musculus OX=10090 GN=Arpc5 PE=1 SV=3	Q9CPW4	Actin-related protein 2/3 complex subunit 5	Arpc5	43757	67432	99515	735155	341173	298291	374184	282784		118100	171167	164062	747091	556688	536503	265924	505778	266792		high	8	8	66.2
	sp|Q9D898|ARP5L_MOUSE Actin-related protein 2/3 complex subunit 5-like protein OS=Mus musculus OX=10090 GN=Arpc5l PE=1 SV=1	Q9D898	Actin-related protein 2/3 complex subunit 5-like protein	Arpc5l	1279	4727	13470	106570	58085	73436	72952	83981		17129	11534	15253	202787	165123	323180	96373	113161	56699		high	10	10	65.4
	sp|Q9EQP6|ARRC_MOUSE Arrestin-C OS=Mus musculus OX=10090 GN=Arr3 PE=1 SV=1	Q9EQP6	Arrestin-C	Arr3	3058	4261	3500	0	0	0	0	0		2734	4321	3225	0	0	0	0	0	0		low	2	2	5.2
	sp|Q8BWG8-2|ARRB1_MOUSE Isoform 1B of Beta-arrestin-1 OS=Mus musculus OX=10090 GN=Arrb1;sp|Q8BWG8|ARRB1_MOUSE Beta-arrestin-1 OS=Mus musculus OX=10090 GN=Arrb1 PE=1 SV=1	Q8BWG8-2;Q8BWG8;P20443	Beta-arrestin-1	Arrb1	15666	16054	12541	34585	22444	12598	28767	23619		17174	14558	14695	13355	37396	10987	11259	32251	6561		high	21	21	77.8
	sp|Q91YI4|ARRB2_MOUSE Beta-arrestin-2 OS=Mus musculus OX=10090 GN=Arrb2 PE=1 SV=1;sp|Q91YI4-2|ARRB2_MOUSE Isoform 2 of Beta-arrestin-2 OS=Mus musculus OX=10090 GN=Arrb2	Q91YI4;Q91YI4-2	Beta-arrestin-2	Arrb2	29255	33131	32831	129516	127628	67644	81647	78024		26706	47278	46239	101465	116161	78789	74686	100823	63526		high	26	25	72.4
	sp|Q99KN1|ARRD1_MOUSE Arrestin domain-containing protein 1 OS=Mus musculus OX=10090 GN=Arrdc1 PE=1 SV=2;sp|Q99KN1-2|ARRD1_MOUSE Isoform 2 of Arrestin domain-containing protein 1 OS=Mus musculus OX=10090 GN=Arrdc1	Q99KN1;Q99KN1-2	Arrestin domain-containing protein 1	Arrdc1	1374	1167	2044	3340	13916	591	5306	7349		2315	2658	2830	26455	14451	3640	8191	8687	15771		high	12	12	48.4
	sp|P50429-2|ARSB_MOUSE Isoform 2 of Arylsulfatase B OS=Mus musculus OX=10090 GN=Arsb;sp|P50429|ARSB_MOUSE Arylsulfatase B OS=Mus musculus OX=10090 GN=Arsb PE=1 SV=3	P50429-2;P50429	Arylsulfatase B	Arsb	74	0	234	50	788	1036	603	0		0	230	114	448	135	425	0	0	121		medium	3	3	7.2
	sp|O35975|NAR2B_MOUSE T-cell ecto-ADP-ribosyltransferase 2 OS=Mus musculus OX=10090 GN=Art2b PE=1 SV=2	O35975;P17981	T-cell ecto-ADP-ribosyltransferase 2	Art2b	10705	11465	9663	0	0	0	0	0		21162	29770	30008	0	0	0	0	0	0		high	12	12	43.3
	sp|Q9CRA0|NAR4_MOUSE Ecto-ADP-ribosyltransferase 4 OS=Mus musculus OX=10090 GN=Art4 PE=1 SV=1	Q9CRA0	Ecto-ADP-ribosyltransferase 4	Art4	62	0	0	0	0	0	0	1015		1689	696	224	0	0	0	0	0	0		medium	6	6	32
	sp|Q9D0U9|ARV1_MOUSE Protein ARV1 OS=Mus musculus OX=10090 GN=Arv1 PE=2 SV=1	Q9D0U9	Protein ARV1	Arv1	0	0	0	789	0	686	0	0		0	0	0	954	1061	734	856	1725	0		low	2	2	9
	sp|Q91WU5|AS3MT_MOUSE Arsenite methyltransferase OS=Mus musculus OX=10090 GN=As3mt PE=1 SV=2	Q91WU5	Arsenite methyltransferase	As3mt	2107	3275	3411	6397	874	1192	3922	1080		7863	8963	9705	16337	12658	12141	11634	10688	5459		high	21	21	65.4
	sp|Q9WV54|ASAH1_MOUSE Acid ceramidase OS=Mus musculus OX=10090 GN=Asah1 PE=1 SV=1	Q9WV54	Acid ceramidase;Acid ceramidase subunit alpha;Acid ceramidase subunit beta	Asah1	1027	1993	1903	5019	2713	675	6193	3285		1631	3877	2724	6011	1329	5306	5283	2114	1550		high	12	12	28.9
	sp|Q9QWY8|ASAP1_MOUSE Arf-GAP with SH3 domain, ANK repeat and PH domain-containing protein 1 OS=Mus musculus OX=10090 GN=Asap1 PE=1 SV=2;sp|Q9QWY8-4|ASAP1_MOUSE Isoform 4 of Arf-GAP with SH3 domain, ANK repeat and PH domain-containing protein 1 OS=Mus musc	Q9QWY8;Q9QWY8-4;Q9QWY8-3;Q9QWY8-2	Arf-GAP with SH3 domain, ANK repeat and PH domain-containing protein 1	Asap1	1458	1676	1703	2641	2695	1998	2000	4208		760	1553	1691	3337	2019	2948	1696	2147	406		high	29	28	31.4
	sp|Q5U464|ASAP3_MOUSE Arf-GAP with SH3 domain, ANK repeat and PH domain-containing protein 3 OS=Mus musculus OX=10090 GN=Asap3 PE=2 SV=1	Q5U464	Arf-GAP with SH3 domain, ANK repeat and PH domain-containing protein 3	Asap3	251	0	356	0	0	0	2214	0		462	573	0	0	768	2496	1211	0	2787		low	2	2	3.5
	sp|Q9WV72|ASB3_MOUSE Ankyrin repeat and SOCS box protein 3 OS=Mus musculus OX=10090 GN=Asb3 PE=1 SV=2	Q9WV72	Ankyrin repeat and SOCS box protein 3	Asb3	0	179	155	822	2438	839	3383	1876		0	179	266	1570	2978	2922	578	1890	1345		medium	5	5	15.2
	sp|Q91ZU1|ASB6_MOUSE Ankyrin repeat and SOCS box protein 6 OS=Mus musculus OX=10090 GN=Asb6 PE=1 SV=1	Q91ZU1	Ankyrin repeat and SOCS box protein 6	Asb6	0	0	0	11266	11202	10103	3132	7787		0	0	272	18495	16703	13962	12238	8985	8093		high	14	14	49.3
	sp|Q9D8Z1|ASCC1_MOUSE Activating signal cointegrator 1 complex subunit 1 OS=Mus musculus OX=10090 GN=Ascc1 PE=1 SV=1	Q9D8Z1	Activating signal cointegrator 1 complex subunit 1	Ascc1	2021	2054	1039	6384	0	760	2088	373		1018	3336	3200	6993	8633	1911	7109	6478	4972		high	13	13	51.1
	sp|Q91WR3-3|ASCC2_MOUSE Isoform 3 of Activating signal cointegrator 1 complex subunit 2 OS=Mus musculus OX=10090 GN=Ascc2;sp|Q91WR3|ASCC2_MOUSE Activating signal cointegrator 1 complex subunit 2 OS=Mus musculus OX=10090 GN=Ascc2 PE=1 SV=1;sp|Q91WR3-2|ASCC2	Q91WR3-3;Q91WR3;Q91WR3-2	Activating signal cointegrator 1 complex subunit 2	Ascc2	106	149	411	13241	8319	7768	6614	5768		114	586	474	13358	15780	13811	10972	19345	13948		high	17	17	30.6
	sp|E9PZJ8|ASCC3_MOUSE Activating signal cointegrator 1 complex subunit 3 OS=Mus musculus OX=10090 GN=Ascc3 PE=1 SV=1	E9PZJ8;E9PZJ8-2	Activating signal cointegrator 1 complex subunit 3	Ascc3	504	708	812	8523	6861	6002	4779	6734		550	442	958	9307	15890	9812	9407	11972	10128		high	68	68	40.1
	sp|Q9CQE6|ASF1A_MOUSE Histone chaperone ASF1A OS=Mus musculus OX=10090 GN=Asf1a PE=1 SV=1	Q9CQE6	Histone chaperone ASF1A	Asf1a	5045	9135	7211	102649	32359	33797	53858	43897		13998	14725	14992	121778	118491	108127	85484	88624	66411		high	9	8	57.8
	sp|Q9DAP7|ASF1B_MOUSE Histone chaperone ASF1B OS=Mus musculus OX=10090 GN=Asf1b PE=1 SV=1	Q9DAP7	Histone chaperone ASF1B	Asf1b	0	0	0	16092	15668	10693	819	19187		342	0	0	19090	21108	34241	43050	14806	26658		medium	7	7	42.1
	sp|Q91X20|ASH2L_MOUSE Set1/Ash2 histone methyltransferase complex subunit ASH2 OS=Mus musculus OX=10090 GN=Ash2l PE=1 SV=1	Q91X20	Set1/Ash2 histone methyltransferase complex subunit ASH2	Ash2l	8861	8666	11420	39611	39669	29244	33343	31630		13681	10439	17031	31348	33769	52857	32594	40417	28959		high	22	22	45.3
	sp|Q91YI0|ARLY_MOUSE Argininosuccinate lyase OS=Mus musculus OX=10090 GN=Asl PE=1 SV=1	Q91YI0	Argininosuccinate lyase	Asl	12893	12953	12071	30712	24082	37289	25229	33214		13438	16365	18846	34562	26259	26139	14440	30490	28371		high	24	24	49.1
	sp|O54984|GET3_MOUSE ATPase GET3 OS=Mus musculus OX=10090 GN=Get3 PE=1 SV=2	O54984	ATPase Asna1	Asna1	5435	11850	10865	161823	93390	92399	74184	107540		16732	16217	16841	134253	133624	157032	112314	145153	111355		high	16	16	59.5
	sp|Q61024|ASNS_MOUSE Asparagine synthetase [glutamine-hydrolyzing] OS=Mus musculus OX=10090 GN=Asns PE=1 SV=3	Q61024	Asparagine synthetase [glutamine-hydrolyzing]	Asns	0	0	0	5915	6826	2582	2141	7547		0	0	0	19637	24130	23645	21564	15954	8514		high	20	20	47.1
	sp|Q8BFS9-2|ASND1_MOUSE Isoform 2 of Asparagine synthetase domain-containing protein 1 OS=Mus musculus OX=10090 GN=Asnsd1;sp|Q8BFS9|ASND1_MOUSE Asparagine synthetase domain-containing protein 1 OS=Mus musculus OX=10090 GN=Asnsd1 PE=2 SV=1	Q8BFS9-2;Q8BFS9	Asparagine synthetase domain-containing protein 1	Asnsd1	0	0	0	1210	841	1073	763	1053		0	0	0	740	2418	1365	1308	1417	1605		medium	6	6	17.8
	sp|Q8BSY0|ASPH_MOUSE Aspartyl/asparaginyl beta-hydroxylase OS=Mus musculus OX=10090 GN=Asph PE=1 SV=1	Q8BSY0;Q8BSY0-2	Aspartyl/asparaginyl beta-hydroxylase	Asph	0	0	0	0	0	0	0	266		0	0	0	0	0	0	0	131	277		medium	3	3	8.2
	sp|Q8VBT9|ASPC1_MOUSE Tether containing UBX domain for GLUT4 OS=Mus musculus OX=10090 GN=Aspscr1 PE=1 SV=1;sp|Q8VBT9-2|ASPC1_MOUSE Isoform 2 of Tether containing UBX domain for GLUT4 OS=Mus musculus OX=10090 GN=Aspscr1	Q8VBT9;Q8VBT9-2	Tether containing UBX domain for GLUT4	Aspscr1	2314	2236	3531	21401	19213	24194	14428	21570		3129	2414	2585	23764	26231	18773	17623	20354	15935		low	20	7	52.5
	sp|Q8C0M9|ASGL1_MOUSE Isoaspartyl peptidase/L-asparaginase OS=Mus musculus OX=10090 GN=Asrgl1 PE=1 SV=1	Q8C0M9	Isoaspartyl peptidase/L-asparaginase;Isoaspartyl peptidase/L-asparaginase alpha chain;Isoaspartyl peptidase/L-asparaginase beta chain	Asrgl1	4766	6365	6551	53328	23642	19864	29472	28414		10281	8285	9303	50100	39491	34576	34635	32821	19351		high	13	13	53.4
	sp|P16460|ASSY_MOUSE Argininosuccinate synthase OS=Mus musculus OX=10090 GN=Ass1 PE=1 SV=1	P16460	Argininosuccinate synthase	Ass1	256360	259612	212878	584826	510572	356105	302706	373128		121490	104003	98296	204274	229269	153276	134848	157970	73732		high	27	27	70.4
	sp|Q8QZV7|INT13_MOUSE Integrator complex subunit 13 OS=Mus musculus OX=10090 GN=IntS13 PE=1 SV=2	Q8QZV7	Protein asunder homolog	Asun	4772	5328	5683	20914	29395	19813	17971	14405		6026	8376	8017	27257	33895	33999	23430	25071	13721		high	29	29	50.4
	sp|P59598|ASXL1_MOUSE Polycomb group protein ASXL1 OS=Mus musculus OX=10090 GN=Asxl1 PE=1 SV=1	P59598	Putative Polycomb group protein ASXL1	Asxl1	0	0	0	580	247	0	0	0		0	0	0	0	0	0	83	224	0		medium	4	4	4.9
	sp|Q8BZ32|ASXL2_MOUSE Putative Polycomb group protein ASXL2 OS=Mus musculus OX=10090 GN=Asxl2 PE=1 SV=1	Q8BZ32	Putative Polycomb group protein ASXL2	Asxl2	54	0	0	209	51	354	0	492		63	131	103	356	0	930	0	0	90		high	8	8	8.8
	sp|Q9D5T0|ATAD1_MOUSE ATPase family AAA domain-containing protein 1 OS=Mus musculus OX=10090 GN=Atad1 PE=1 SV=1	Q9D5T0	ATPase family AAA domain-containing protein 1	Atad1	3616	5375	5858	153007	133872	130922	98648	124101		4010	9134	10219	141740	117282	131781	120944	112679	124276		high	19	19	64
	sp|Q8CDM1|ATAD2_MOUSE ATPase family AAA domain-containing protein 2 OS=Mus musculus OX=10090 GN=Atad2 PE=1 SV=1	Q8CDM1;Q8CDM1-2	ATPase family AAA domain-containing protein 2	Atad2	1932	2052	1651	66666	37008	27447	27581	27382		2478	3695	3831	54303	57436	50793	45818	78822	28249		high	53	49	59.7
	tr|E9Q166|E9Q166_MOUSE ATPase family, AAA domain-containing 2B OS=Mus musculus OX=10090 GN=Atad2b PE=1 SV=1	E9Q166		Atad2b	1273	2905	1830	3867	4266	4505	4296	5646		1918	2073	1944	3470	3729	2153	3195	3083	3953		high	46	39	43.8
	sp|Q925I1|ATAD3_MOUSE ATPase family AAA domain-containing protein 3 OS=Mus musculus OX=10090 GN=Atad3 PE=1 SV=1;sp|Q925I1-2|ATAD3_MOUSE Isoform 2 of ATPase family AAA domain-containing protein 3 OS=Mus musculus OX=10090 GN=Atad3	Q925I1;Q925I1-2;H3BK90;H3BKI6;V9GWS5;V9GWS6	ATPase family AAA domain-containing protein 3	Atad3	10620	10108	12971	166694	121668	123857	124567	109468		17267	16852	15599	204147	180702	163202	124934	180499	141061		high	40	40	61.8
	sp|Q4QY64|ATAD5_MOUSE ATPase family AAA domain-containing protein 5 OS=Mus musculus OX=10090 GN=Atad5 PE=1 SV=1	Q4QY64;Q4QY64-2	ATPase family AAA domain-containing protein 5	Atad5	0	0	0	5254	2139	2273	2379	2806		0	0	0	5367	3912	6144	4669	5861	3388		high	39	39	30.6
	sp|Q9Z2A5|ATE1_MOUSE Arginyl-tRNA--protein transferase 1 OS=Mus musculus OX=10090 GN=Ate1 PE=1 SV=2	Q9Z2A5	Arginyl-tRNA--protein transferase 1	Ate1	3963	5847	5958	24574	27777	16032	17740	11968		4392	4508	5785	21591	17271	20346	18625	22177	17013		low	15	2	46.7
	sp|Q9Z2A5-2|ATE1_MOUSE Isoform ATE1-2 of Arginyl-tRNA--protein transferase 1 OS=Mus musculus OX=10090 GN=Ate1	Q9Z2A5-2	Arginyl-tRNA--protein transferase 1	Ate1	0	1465	1400	3113	2784	0	1776	0		627	0	0	0	2693	2714	1868	0	1793		low	2	2	49.6
	sp|P81269|ATF1_MOUSE Cyclic AMP-dependent transcription factor ATF-1 OS=Mus musculus OX=10090 GN=Atf1 PE=1 SV=1	P81269	Cyclic AMP-dependent transcription factor ATF-1	Atf1	0	488	287	6855	12786	28985	11922	9865		643	391	0	23913	15956	13473	19492	7625	16476		low	2	2	20.1
	sp|P16951-2|ATF2_MOUSE Isoform 2 of Cyclic AMP-dependent transcription factor ATF-2 OS=Mus musculus OX=10090 GN=Atf2;sp|P16951|ATF2_MOUSE Cyclic AMP-dependent transcription factor ATF-2 OS=Mus musculus OX=10090 GN=Atf2 PE=1 SV=2;sp|P16951-3|ATF2_MOUSE Isof	P16951-2;P16951;P16951-3	Cyclic AMP-dependent transcription factor ATF-2	Atf2	100	194	417	5468	3742	4543	3729	5259		0	897	349	4969	7375	6836	1758	3115	1020		high	8	7	34.4
	sp|Q8R0S1|ATF7_MOUSE Cyclic AMP-dependent transcription factor ATF-7 OS=Mus musculus OX=10090 GN=Atf7 PE=2 SV=1	Q8R0S1	Cyclic AMP-dependent transcription factor ATF-7	Atf7	119	0	147	2257	3234	6354	650	1710		389	0	0	5980	3325	7628	1165	2128	5754		medium	5	5	24
	sp|Q7TT18|MCAF1_MOUSE Activating transcription factor 7-interacting protein 1 OS=Mus musculus OX=10090 GN=Atf7ip PE=1 SV=1	Q7TT18;Q7TT18-2	Activating transcription factor 7-interacting protein 1	Atf7ip	475	1658	1286	9516	3899	4169	3267	7724		1032	2323	1837	7179	7129	6325	5852	7549	4651		high	24	24	32.2
	sp|Q9D8Z6|ATGA1_MOUSE Autophagy-related protein 101 OS=Mus musculus OX=10090 GN=Atg101 PE=1 SV=1	Q9D8Z6	Autophagy-related protein 101	Atg101	0	0	0	0	701	0	0	0		0	0	0	1683	0	0	2184	521	0		medium	3	3	23.9
	sp|Q91YI1-2|ATG13_MOUSE Isoform 2 of Autophagy-related protein 13 OS=Mus musculus OX=10090 GN=Atg13;sp|Q91YI1|ATG13_MOUSE Autophagy-related protein 13 OS=Mus musculus OX=10090 GN=Atg13 PE=1 SV=2	Q91YI1-2;Q91YI1	Autophagy-related protein 13	Atg13	0	190	100	0	505	454	24844	6814		0	0	0	0	0	0	334	441	298		medium	7	7	19.4
	sp|Q8CDJ3|BAKOR_MOUSE Beclin 1-associated autophagy-related key regulator OS=Mus musculus OX=10090 GN=Atg14 PE=1 SV=1	Q8CDJ3	Beclin 1-associated autophagy-related key regulator	Atg14	64	78	48	553	340	0	0	0		113	393	0	0	0	0	0	0	0		medium	3	3	11.2
	sp|Q8C0J2-2|A16L1_MOUSE Isoform 2 of Autophagy-related protein 16-1 OS=Mus musculus OX=10090 GN=Atg16l1;sp|Q8C0J2-5|A16L1_MOUSE Isoform 5 of Autophagy-related protein 16-1 OS=Mus musculus OX=10090 GN=Atg16l1;sp|Q8C0J2|A16L1_MOUSE Autophagy-related protein	Q8C0J2-2;Q8C0J2-5;Q8C0J2;Q8C0J2-3;Q8C0J2-4	Autophagy-related protein 16-1	Atg16l1	1291	1664	1536	8585	10713	8418	7885	7745		1576	2093	2414	16516	16404	20117	10174	10091	12570		high	16	16	43
	sp|Q6KAU8|A16L2_MOUSE Autophagy-related protein 16-2 OS=Mus musculus OX=10090 GN=Atg16l2 PE=2 SV=2;sp|Q6KAU8-2|A16L2_MOUSE Isoform 2 of Autophagy-related protein 16-2 OS=Mus musculus OX=10090 GN=Atg16l2	Q6KAU8;Q6KAU8-2	Autophagy-related protein 16-2	Atg16l2	0	0	0	590	559	1249	669	1079		119	235	161	2439	558	1633	101	1406	446		medium	7	7	15.1
	sp|Q6P4T0|ATG2A_MOUSE Autophagy-related protein 2 homolog A OS=Mus musculus OX=10090 GN=Atg2a PE=1 SV=2	Q6P4T0	Autophagy-related protein 2 homolog A	Atg2a	19	94	126	802	315	262	1064	445		97	141	216	316	800	420	497	267	1038		high	20	20	16.2
	sp|Q80XK6|ATG2B_MOUSE Autophagy-related protein 2 homolog B OS=Mus musculus OX=10090 GN=Atg2b PE=1 SV=3	Q80XK6;Q80XK6-5;Q80XK6-4	Autophagy-related protein 2 homolog B	Atg2b	109	168	695	4101	3033	2986	3055	3171		41	1670	317	4187	4224	4805	3027	3256	3960		high	41	41	29.1
	sp|Q9CPX6|ATG3_MOUSE Ubiquitin-like-conjugating enzyme ATG3 OS=Mus musculus OX=10090 GN=Atg3 PE=1 SV=1	Q9CPX6	Ubiquitin-like-conjugating enzyme ATG3	Atg3	2629	6017	3975	45753	53650	53400	47635	63379		5114	6249	6134	68625	72587	83270	65731	72681	67496		high	13	13	51.3
	sp|Q8C9S8|ATG4A_MOUSE Cysteine protease ATG4A OS=Mus musculus OX=10090 GN=Atg4a PE=2 SV=2	Q8C9S8	Cysteine protease ATG4A	Atg4a	0	45	129	925	0	932	2179	986		0	65	75	473	768	1439	594	866	617		medium	6	6	23.5
	sp|Q8BGE6|ATG4B_MOUSE Cysteine protease ATG4B OS=Mus musculus OX=10090 GN=Atg4b PE=1 SV=2	Q8BGE6	Cysteine protease ATG4B	Atg4b	150	517	334	22023	12709	9949	13722	16763		408	615	366	32449	21507	26713	17004	34268	18769		high	16	16	57.3
	sp|Q99J83|ATG5_MOUSE Autophagy protein 5 OS=Mus musculus OX=10090 GN=Atg5 PE=1 SV=1	Q99J83	Autophagy protein 5	Atg5	4336	5686	5341	57042	42445	18616	22785	37881		4088	8157	6929	39070	25800	33179	21424	39976	27112		high	13	13	53.8
	sp|Q9D906|ATG7_MOUSE Ubiquitin-like modifier-activating enzyme ATG7 OS=Mus musculus OX=10090 GN=Atg7 PE=1 SV=1	Q9D906	Ubiquitin-like modifier-activating enzyme ATG7	Atg7	924	1484	1668	20402	24547	16739	13868	16869		1418	2426	2341	11246	14634	32560	12643	20437	16352		high	26	26	48.6
	sp|Q8BP56-3|PGGHG_MOUSE Isoform 3 of Protein-glucosylgalactosylhydroxylysine glucosidase OS=Mus musculus OX=10090 GN=Pgghg;sp|Q8BP56|PGGHG_MOUSE Protein-glucosylgalactosylhydroxylysine glucosidase OS=Mus musculus OX=10090 GN=Pgghg PE=1 SV=1;sp|Q8BP56-2|PGG	Q8BP56-3;Q8BP56;Q8BP56-2	Acid trehalase-like protein 1	Athl1	452	871	846	0	0	388	0	746		656	504	835	0	0	0	0	0	0		high	10	10	18.6
	sp|Q9CWJ9|PUR9_MOUSE Bifunctional purine biosynthesis protein ATIC OS=Mus musculus OX=10090 GN=Atic PE=1 SV=2	Q9CWJ9	Bifunctional purine biosynthesis protein PURH;Phosphoribosylaminoimidazolecarboxamide formyltransferase;IMP cyclohydrolase	Atic	90605	134911	160270	1979831	1454012	1256223	1198487	1407044		237629	271302	229925	2021292	1849298	2120818	1618819	1863574	1511596		high	50	50	83.3
	sp|Q6PA06|ATLA2_MOUSE Atlastin-2 OS=Mus musculus OX=10090 GN=Atl2 PE=1 SV=1;sp|Q6PA06-2|ATLA2_MOUSE Isoform 2 of Atlastin-2 OS=Mus musculus OX=10090 GN=Atl2	Q6PA06;Q6PA06-2	Atlastin-2	Atl2	296	50	0	26276	15376	21186	19469	17184		344	368	111	35002	27829	37592	27673	28754	25564		high	20	19	45.6
	sp|Q91YH5|ATLA3_MOUSE Atlastin-3 OS=Mus musculus OX=10090 GN=Atl3 PE=1 SV=1;sp|Q91YH5-2|ATLA3_MOUSE Isoform 2 of Atlastin-3 OS=Mus musculus OX=10090 GN=Atl3	Q91YH5;Q91YH5-2	Atlastin-3	Atl3	24367	26898	25012	170440	163822	109165	133951	173168		26025	37977	37406	164271	132950	135361	140662	196297	128438		high	27	25	64.7
	sp|Q62388|ATM_MOUSE Serine-protein kinase ATM OS=Mus musculus OX=10090 GN=Atm PE=1 SV=2	Q62388	Serine-protein kinase ATM	Atm	708	943	851	4624	3402	2001	4064	3994		1264	1380	1728	4123	3853	3408	3968	3314	2474		high	81	81	32.4
	sp|O35126|ATN1_MOUSE Atrophin-1 OS=Mus musculus OX=10090 GN=Atn1 PE=1 SV=1	O35126	Atrophin-1	Atn1	0	416	344	2690	2833	1475	1966	3058		183	86	247	1481	1639	1027	1584	614	878		high	11	11	17.2
	sp|O08997|ATOX1_MOUSE Copper transport protein ATOX1 OS=Mus musculus OX=10090 GN=Atox1 PE=1 SV=1	O08997	Copper transport protein ATOX1	Atox1	8875	0	3014	254798	140656	94930	84911	170888		39452	10091	7782	333008	183248	115556	146853	192130	64575		medium	4	4	83.8
	tr|Q6DFW5|Q6DFW5_MOUSE Phospholipid-transporting ATPase OS=Mus musculus OX=10090 GN=Atp11b PE=1 SV=1;tr|A0A0G2JE89|A0A0G2JE89_MOUSE Phospholipid-transporting ATPase (Fragment) OS=Mus musculus OX=10090 GN=Atp11b PE=1 SV=1	Q6DFW5;A0A0G2JE89;A0A0G2JF19;A0A0G2JED0	Phospholipid-transporting ATPase	Atp11b	2978	2384	1869	5715	5672	3870	3369	5893		4265	2902	3587	3931	3862	3431	4490	3974	3786		high	34	32	33.7
	sp|Q9QZW0-2|AT11C_MOUSE Isoform 2 of Phospholipid-transporting ATPase 11C OS=Mus musculus OX=10090 GN=Atp11c;sp|Q9QZW0|AT11C_MOUSE Phospholipid-transporting ATPase 11C OS=Mus musculus OX=10090 GN=Atp11c PE=1 SV=2	Q9QZW0-2;Q9QZW0	Phospholipid-transporting ATPase 11C	Atp11c	1829	1814	1594	6943	5097	5923	6075	6825		1467	1669	1426	8904	5056	10305	7437	6239	13492		high	25	24	30.8
	sp|Q9EPE9|AT131_MOUSE Manganese-transporting ATPase 13A1 OS=Mus musculus OX=10090 GN=Atp13a1 PE=1 SV=2	Q9EPE9	Manganese-transporting ATPase 13A1	Atp13a1	4733	6013	6104	24047	19534	18314	28442	25728		4437	6365	7100	25192	23424	26162	22488	21331	19594		high	49	49	48.8
	sp|Q5XF89|AT133_MOUSE Probable cation-transporting ATPase 13A3 OS=Mus musculus OX=10090 GN=Atp13a3 PE=1 SV=1;sp|Q5XF89-2|AT133_MOUSE Isoform 2 of Probable cation-transporting ATPase 13A3 OS=Mus musculus OX=10090 GN=Atp13a3	Q5XF89;Q5XF89-2	Probable cation-transporting ATPase 13A3	Atp13a3	30	84	45	4097	4298	2098	1683	1976		105	100	67	4037	4026	3392	3533	3571	3715		high	22	22	25.8
	sp|Q8VDN2|AT1A1_MOUSE Sodium/potassium-transporting ATPase subunit alpha-1 OS=Mus musculus OX=10090 GN=Atp1a1 PE=1 SV=1	Q8VDN2;Q6PIC6	Sodium/potassium-transporting ATPase subunit alpha-1	Atp1a1	68845	68261	64010	732708	653595	553121	624804	571362		72525	93878	89096	654154	582369	733748	548824	647163	584687		medium	55	40	52.9
	sp|P14094|AT1B1_MOUSE Sodium/potassium-transporting ATPase subunit beta-1 OS=Mus musculus OX=10090 GN=Atp1b1 PE=1 SV=1	P14094	Sodium/potassium-transporting ATPase subunit beta-1	Atp1b1	9243	12300	15139	34881	31509	48719	49438	47709		7074	12868	7712	39091	21046	24139	23510	32046	32599		high	9	9	39.5
	sp|P97370|AT1B3_MOUSE Sodium/potassium-transporting ATPase subunit beta-3 OS=Mus musculus OX=10090 GN=Atp1b3 PE=1 SV=1	P97370	Sodium/potassium-transporting ATPase subunit beta-3	Atp1b3	32010	46666	39348	570795	494569	367310	372831	399805		57813	60488	72743	535891	470545	492672	315258	448896	442854		high	19	19	60.8
	sp|O55143|AT2A2_MOUSE Sarcoplasmic/endoplasmic reticulum calcium ATPase 2 OS=Mus musculus OX=10090 GN=Atp2a2 PE=1 SV=2;sp|O55143-2|AT2A2_MOUSE Isoform 2 of Sarcoplasmic/endoplasmic reticulum calcium ATPase 2 OS=Mus musculus OX=10090 GN=Atp2a2	O55143;O55143-2	Sarcoplasmic/endoplasmic reticulum calcium ATPase 2	Atp2a2	6927	6753	5906	214840	182815	154339	143848	122723		8042	9994	9719	209533	188524	185833	194405	202234	165372		high	42	33	53.6
	sp|Q64518|AT2A3_MOUSE Sarcoplasmic/endoplasmic reticulum calcium ATPase 3 OS=Mus musculus OX=10090 GN=Atp2a3 PE=1 SV=3;sp|Q64518-3|AT2A3_MOUSE Isoform SERCA3C of Sarcoplasmic/endoplasmic reticulum calcium ATPase 3 OS=Mus musculus OX=10090 GN=Atp2a3;sp|Q645	Q64518;Q64518-3;Q64518-2	Sarcoplasmic/endoplasmic reticulum calcium ATPase 3	Atp2a3	34501	32548	33608	102622	111744	84604	81144	109211		25901	41198	38070	120894	113525	152362	104078	90411	100486		high	52	40	47.2
	sp|G5E829|AT2B1_MOUSE Plasma membrane calcium-transporting ATPase 1 OS=Mus musculus OX=10090 GN=Atp2b1 PE=1 SV=1	G5E829	Plasma membrane calcium-transporting ATPase 1	Atp2b1	1099	1337	1559	10557	11044	7785	7638	12379		1294	1652	1530	7313	8534	8986	12740	11423	12017		medium	31	18	30.5
	sp|Q6Q477-2|AT2B4_MOUSE Isoform 2 of Plasma membrane calcium-transporting ATPase 4 OS=Mus musculus OX=10090 GN=Atp2b4;sp|Q6Q477|AT2B4_MOUSE Plasma membrane calcium-transporting ATPase 4 OS=Mus musculus OX=10090 GN=Atp2b4 PE=1 SV=1	Q6Q477-2;Q6Q477	Calcium-transporting ATPase	Atp2b4	0	0	0	0	617	295	0	262		0	0	0	227	240	188	152	0	0		medium	3	3	15.1
	sp|Q80XR2|AT2C1_MOUSE Calcium-transporting ATPase type 2C member 1 OS=Mus musculus OX=10090 GN=Atp2c1 PE=1 SV=2	Q80XR2;A7L9Z8	Calcium-transporting ATPase type 2C member 1	Atp2c1	398	637	569	1405	619	1429	1931	515		255	62	516	423	735	2316	1466	745	1036		high	17	17	29.4
	sp|Q03265|ATPA_MOUSE ATP synthase subunit alpha, mitochondrial OS=Mus musculus OX=10090 GN=Atp5f1a PE=1 SV=1	Q03265	ATP synthase subunit alpha, mitochondrial	Atp5a1	411264	485908	533232	4037663	3613099	2859273	2980458	3086805		671523	636275	616891	3050277	3190261	3327842	2807138	2847981	3213524		high	52	52	78.1
	sp|P56480|ATPB_MOUSE ATP synthase subunit beta, mitochondrial OS=Mus musculus OX=10090 GN=Atp5f1b PE=1 SV=2	P56480	ATP synthase subunit beta, mitochondrial	Atp5b	447929	524439	529687	4171039	3627360	3199565	3545879	3184346		582540	622266	512634	3761883	3272764	4136869	2716499	3443345	2594488		high	36	36	80.5
	sp|Q91VR2|ATPG_MOUSE ATP synthase subunit gamma, mitochondrial OS=Mus musculus OX=10090 GN=Atp5f1c PE=1 SV=1	Q91VR2	ATP synthase subunit gamma, mitochondrial	Atp5c1	98009	100164	104926	1111432	857637	578455	612564	606484		96498	130961	148247	829002	671371	815854	789335	620537	530185		high	12	12	37.9
	sp|Q9D3D9|ATPD_MOUSE ATP synthase subunit delta, mitochondrial OS=Mus musculus OX=10090 GN=Atp5f1d PE=1 SV=1	Q9D3D9	ATP synthase subunit delta, mitochondrial	Atp5d	795	814	695	232032	108389	158746	101525	207207		0	19452	2107	430888	319057	215053	121591	367482	218155		medium	4	4	26.2
	sp|Q9CQQ7|AT5F1_MOUSE ATP synthase F(0) complex subunit B1, mitochondrial OS=Mus musculus OX=10090 GN=Atp5pb PE=1 SV=1	Q9CQQ7	ATP synthase F(0) complex subunit B1, mitochondrial	Atp5f1	23612	40732	43246	871032	709718	786948	507225	576287		75182	53035	65143	742576	657198	487381	979295	670598	624506		high	16	16	47.3
	sp|Q9DCX2|ATP5H_MOUSE ATP synthase subunit d, mitochondrial OS=Mus musculus OX=10090 GN=Atp5pd PE=1 SV=3	Q9DCX2	ATP synthase subunit d, mitochondrial	Atp5h	10364	11369	24771	160073	80288	70437	83172	92809		22640	37211	28300	470673	238898	105583	135471	207948	44778		high	15	15	80.1
	sp|Q06185|ATP5I_MOUSE ATP synthase subunit e, mitochondrial OS=Mus musculus OX=10090 GN=Atp5me PE=1 SV=2	Q06185	ATP synthase subunit e, mitochondrial	Atp5i	6469	5018	7408	80062	51496	45690	30994	58155		14222	20913	18052	211985	135000	75320	3036	138293	56143		medium	4	4	56.3
	sp|P97450|ATP5J_MOUSE ATP synthase-coupling factor 6, mitochondrial OS=Mus musculus OX=10090 GN=Atp5pf PE=1 SV=1	P97450	ATP synthase-coupling factor 6, mitochondrial	Atp5j	0	0	0	0	7254	4907	5530	4808		0	0	0	0	0	21787	0	4143	0		medium	3	3	39.8
	sp|P56135|ATPK_MOUSE ATP synthase subunit f, mitochondrial OS=Mus musculus OX=10090 GN=Atp5mf PE=1 SV=3	P56135	ATP synthase subunit f, mitochondrial	Atp5j2	11765	10870	8798	38907	35147	13564	0	71092		12730	17733	18474	114960	61565	140746	30418	240910	42507		medium	4	4	35.2
	sp|Q9CPQ8|ATP5L_MOUSE ATP synthase subunit g, mitochondrial OS=Mus musculus OX=10090 GN=Atp5mg PE=1 SV=1	Q9CPQ8	ATP synthase subunit g, mitochondrial	Atp5l	1404	2560	6168	226092	134606	126360	157181	131534		5643	1977	17757	203652	82292	104793	104225	129030	67263		medium	4	4	47.6
	sp|Q9DB20|ATPO_MOUSE ATP synthase subunit O, mitochondrial OS=Mus musculus OX=10090 GN=Atp5po PE=1 SV=1	Q9DB20	ATP synthase subunit O, mitochondrial	Atp5o	13231	11849	42616	598534	241092	206406	233216	200374		40596	35371	42242	515653	469565	494709	397079	621522	284434		high	12	12	69
	sp|Q9R1Q9|VAS1_MOUSE V-type proton ATPase subunit S1 OS=Mus musculus OX=10090 GN=Atp6ap1 PE=1 SV=1	Q9R1Q9	V-type proton ATPase subunit S1	Atp6ap1	178	1057	1290	11266	10703	14556	6384	8799		136	475	1217	11550	14562	25032	8848	9065	14779		high	12	12	35.9
	sp|Q9CYN9|RENR_MOUSE Renin receptor OS=Mus musculus OX=10090 GN=Atp6ap2 PE=1 SV=2	Q9CYN9	Renin receptor	Atp6ap2	388	378	402	14625	6599	8579	11205	9222		419	427	435	19252	21032	11409	9551	23494	6197		high	10	10	36.6
	sp|Q9Z1G4-3|VPP1_MOUSE Isoform A1-III of V-type proton ATPase 116 kDa subunit a1 OS=Mus musculus OX=10090 GN=Atp6v0a1;sp|Q9Z1G4-2|VPP1_MOUSE Isoform A1-I of V-type proton ATPase 116 kDa subunit a1 OS=Mus musculus OX=10090 GN=Atp6v0a1;sp|Q9Z1G4|VPP1_MOUSE V	Q9Z1G4-3;Q9Z1G4-2;Q9Z1G4	V-type proton ATPase 116 kDa subunit a isoform 1	Atp6v0a1	0	0	0	8421	6188	5871	0	6335		0	0	0	5925	0	0	0	0	2903		medium	3	3	7.5
	sp|P15920|VPP2_MOUSE V-type proton ATPase 116 kDa subunit a2 OS=Mus musculus OX=10090 GN=Atp6v0a2 PE=1 SV=2	P15920;P15920-2	V-type proton ATPase 116 kDa subunit a isoform 2	Atp6v0a2	740	884	427	3251	1507	1755	1008	1515		282	839	886	1873	556	2364	1113	2368	2143		high	14	13	22
	sp|P63082|VATL_MOUSE V-type proton ATPase 16 kDa proteolipid subunit OS=Mus musculus OX=10090 GN=Atp6v0c PE=1 SV=1	P63082	V-type proton ATPase 16 kDa proteolipid subunit	Atp6v0c	84558	72059	58206	211595	276195	287913	37583	312797		52607	135606	112299	87969	157642	235280	94598	28574	158987		low	1	1	11.6
	sp|P51863|VA0D1_MOUSE V-type proton ATPase subunit d 1 OS=Mus musculus OX=10090 GN=Atp6v0d1 PE=1 SV=2	P51863	V-type proton ATPase subunit d 1	Atp6v0d1	74	165	67	27847	23445	23839	27008	21169		294	475	549	31743	53162	45823	89333	106605	28261		high	12	12	46.2
	sp|P50516|VATA_MOUSE V-type proton ATPase catalytic subunit A OS=Mus musculus OX=10090 GN=Atp6v1a PE=1 SV=2;sp|P50516-2|VATA_MOUSE Isoform 2 of V-type proton ATPase catalytic subunit A OS=Mus musculus OX=10090 GN=Atp6v1a	P50516;P50516-2	V-type proton ATPase catalytic subunit A	Atp6v1a	14301	20217	16098	108845	84976	52764	51648	73732		26319	25074	25730	105294	96885	94591	83576	130003	85852		high	35	35	68.9
	sp|P62814|VATB2_MOUSE V-type proton ATPase subunit B, brain isoform OS=Mus musculus OX=10090 GN=Atp6v1b2 PE=1 SV=1	P62814;Q91YH6;A0A0U1RNU9	V-type proton ATPase subunit B, brain isoform	Atp6v1b2	4116	7281	6619	123710	129873	100651	105958	96719		13008	12136	10423	103703	111819	93949	105385	135889	82252		high	30	30	82.2
	sp|Q9Z1G3|VATC1_MOUSE V-type proton ATPase subunit C 1 OS=Mus musculus OX=10090 GN=Atp6v1c1 PE=1 SV=4	Q9Z1G3;Q99L60-3;Q99L60	V-type proton ATPase subunit C 1	Atp6v1c1	3455	2614	4405	57766	26339	19973	37909	31825		3403	4938	7685	37861	35163	28758	48310	59787	34780		high	23	22	67.8
	sp|P57746|VATD_MOUSE V-type proton ATPase subunit D OS=Mus musculus OX=10090 GN=Atp6v1d PE=1 SV=1	P57746	V-type proton ATPase subunit D	Atp6v1d	7769	4583	8232	25318	29615	29508	19680	31983		12121	10903	9969	25369	29163	58775	33507	41416	33006		high	14	14	56.3
	sp|P50518|VATE1_MOUSE V-type proton ATPase subunit E 1 OS=Mus musculus OX=10090 GN=Atp6v1e1 PE=1 SV=2	P50518;Q9D593	V-type proton ATPase subunit E 1	Atp6v1e1	5824	2763	3396	117650	99959	93625	99319	96570		7739	5954	6657	123012	122599	143117	86735	147874	67555		high	15	15	59.3
	sp|Q9D1K2|VATF_MOUSE V-type proton ATPase subunit F OS=Mus musculus OX=10090 GN=Atp6v1f PE=1 SV=2	Q9D1K2	V-type proton ATPase subunit F	Atp6v1f	0	728	2602	67264	53613	31363	53243	32939		1245	1889	5024	145919	91801	46160	99332	101234	30663		medium	5	5	36.1
	sp|Q9CR51|VATG1_MOUSE V-type proton ATPase subunit G 1 OS=Mus musculus OX=10090 GN=Atp6v1g1 PE=1 SV=3	Q9CR51	V-type proton ATPase subunit G 1	Atp6v1g1	804	0	0	41627	3822	14089	13398	2223		1046	3017	5474	49199	5808	44205	23732	66654	0		medium	6	6	40.7
	sp|Q8BVE3|VATH_MOUSE V-type proton ATPase subunit H OS=Mus musculus OX=10090 GN=Atp6v1h PE=1 SV=1	Q8BVE3	V-type proton ATPase subunit H	Atp6v1h	3989	3276	4994	34554	29305	39098	38421	23307		8430	8453	8944	50108	46552	48037	63852	62012	24367		high	25	25	62.9
	sp|Q64430|ATP7A_MOUSE Copper-transporting ATPase 1 OS=Mus musculus OX=10090 GN=Atp7a PE=1 SV=3	Q64430	Copper-transporting ATPase 1	Atp7a	280	0	0	413	419	364	467	5863		0	0	469	0	12818	0	259	67	0		high	12	12	11.7
	sp|P70704-2|AT8A1_MOUSE Isoform 2 of Phospholipid-transporting ATPase IA OS=Mus musculus OX=10090 GN=Atp8a1	P70704-2	Phospholipid-transporting ATPase IA	Atp8a1	173	140	102	818	1668	636	736	1155		117	220	42	0	0	0	250	0	0		low	11	1	11.4
	sp|P98199|AT8B2_MOUSE Phospholipid-transporting ATPase ID OS=Mus musculus OX=10090 GN=Atp8b2 PE=2 SV=2	P98199	Phospholipid-transporting ATPase ID	Atp8b2	0	66	0	0	0	406	441	227		0	0	0	0	0	244	0	335	441		medium	3	3	4.9
	tr|A2ANX3|A2ANX3_MOUSE Phospholipid-transporting ATPase OS=Mus musculus OX=10090 GN=Atp8b4 PE=1 SV=1	A2ANX3;A2ANX2	Phospholipid-transporting ATPase	Atp8b4	5776	14152	12333	29393	33425	9952	7945	36387		13314	14171	26247	302	456	3348	226	202	223		medium	6	5	6.5
	sp|P98195-2|ATP9B_MOUSE Isoform 2 of Probable phospholipid-transporting ATPase IIB OS=Mus musculus OX=10090 GN=Atp9b;sp|P98195|ATP9B_MOUSE Probable phospholipid-transporting ATPase IIB OS=Mus musculus OX=10090 GN=Atp9b PE=1 SV=4	P98195-2;P98195	Probable phospholipid-transporting ATPase IIB	Atp9b	29	59	63	780	736	201	530	455		53	0	150	987	1266	951	1167	1534	189		high	12	9	13.9
	sp|Q811I0|ATPF1_MOUSE ATP synthase mitochondrial F1 complex assembly factor 1 OS=Mus musculus OX=10090 GN=Atpaf1 PE=1 SV=1	Q811I0	ATP synthase mitochondrial F1 complex assembly factor 1	Atpaf1	296	394	1225	3933	3713	3681	6569	6158		931	712	885	8291	6592	6631	4785	4289	5946		high	9	9	37.7
	sp|Q91YY4|ATPF2_MOUSE ATP synthase mitochondrial F1 complex assembly factor 2 OS=Mus musculus OX=10090 GN=Atpaf2 PE=1 SV=1	Q91YY4	ATP synthase mitochondrial F1 complex assembly factor 2	Atpaf2	296	315	448	11923	16575	7926	1267	12645		1338	213	717	29250	33105	28894	17074	14555	11368		high	10	10	41.5
	sp|O35143|ATIF1_MOUSE ATPase inhibitor, mitochondrial OS=Mus musculus OX=10090 GN=ATP5IF1 PE=1 SV=2	O35143	ATPase inhibitor, mitochondrial	Atpif1	21277	16382	16486	0	1516	6919	0	21259		31060	24009	30765	0	0	11185	11510	0	12135		medium	5	5	24.5
	sp|Q9JKK8|ATR_MOUSE Serine/threonine-protein kinase ATR OS=Mus musculus OX=10090 GN=Atr PE=1 SV=2	Q9JKK8	Serine/threonine-protein kinase ATR	Atr	3	29	5	1371	1434	1138	1377	1924		62	106	122	3251	2836	2691	5554	2502	2717		high	43	43	21.7
	sp|Q8BMG1|ATRIP_MOUSE ATR-interacting protein OS=Mus musculus OX=10090 GN=Atrip PE=1 SV=2	Q8BMG1	ATR-interacting protein	Atrip	0	0	0	385	6413	1187	589	1011		0	0	0	1765	2754	2053	1126	1815	920		high	11	11	19.4
	sp|Q9WU60|ATRN_MOUSE Attractin OS=Mus musculus OX=10090 GN=Atrn PE=1 SV=3	Q9WU60	Attractin	Atrn	0	0	0	0	142	0	98	0		0	0	0	27	185	25	311	0	0		medium	5	5	4
	sp|Q61687|ATRX_MOUSE Transcriptional regulator ATRX OS=Mus musculus OX=10090 GN=Atrx PE=1 SV=3	Q61687	Transcriptional regulator ATRX	Atrx	2661	4137	4190	19504	12856	11501	11428	13116		3610	5291	5165	18639	17492	19351	16362	18606	12872		high	70	70	37.3
	sp|P54254|ATX1_MOUSE Ataxin-1 OS=Mus musculus OX=10090 GN=Atxn1 PE=1 SV=2	P54254	Ataxin-1	Atxn1	0	0	85	0	837	116	0	0		0	110	0	453	75	637	233	878	0		medium	6	6	12.4
	sp|P28658|ATX10_MOUSE Ataxin-10 OS=Mus musculus OX=10090 GN=Atxn10 PE=1 SV=2	P28658	Ataxin-10	Atxn10	1788	3069	3113	212056	153652	137103	127320	202619		3190	2075	2885	160070	170274	189101	122144	180225	124652		high	25	25	61.9
	sp|P0C7T6|ATX1L_MOUSE Ataxin-1-like OS=Mus musculus OX=10090 GN=Atxn1l PE=1 SV=1	P0C7T6	Ataxin-1-like	Atxn1l	62	66	822	0	0	356	419	284		88	0	155	0	0	0	161	0	0		medium	6	6	14.8
	sp|O70305|ATX2_MOUSE Ataxin-2 OS=Mus musculus OX=10090 GN=Atxn2 PE=1 SV=1;sp|O70305-2|ATX2_MOUSE Isoform 2 of Ataxin-2 OS=Mus musculus OX=10090 GN=Atxn2;sp|O70305-3|ATX2_MOUSE Isoform 3 of Ataxin-2 OS=Mus musculus OX=10090 GN=Atxn2	O70305;O70305-2;O70305-3	Ataxin-2	Atxn2	223	387	321	10148	5574	3548	7157	6050		232	424	361	10169	11023	10326	8825	12755	4630		high	24	24	28.1
	sp|Q7TQH0-2|ATX2L_MOUSE Isoform 2 of Ataxin-2-like protein OS=Mus musculus OX=10090 GN=Atxn2l;sp|Q7TQH0-3|ATX2L_MOUSE Isoform 3 of Ataxin-2-like protein OS=Mus musculus OX=10090 GN=Atxn2l	Q7TQH0-2;Q7TQH0-3	Ataxin-2-like protein	Atxn2l	1529	3268	4495	169723	111833	105778	76822	99713		2265	4919	3349	124403	163843	188901	98001	138384	102196		low	42	3	51.6
	sp|Q9CVD2|ATX3_MOUSE Ataxin-3 OS=Mus musculus OX=10090 GN=Atxn3 PE=1 SV=2	Q9CVD2	Ataxin-3	Atxn3	177	1616	475	26463	9530	10115	21341	14879		487	1210	968	28182	33185	26427	12064	10712	11760		high	14	14	59.4
	tr|B7ZCC4|B7ZCC4_MOUSE Ataxin 7-like 2 OS=Mus musculus OX=10090 GN=Atxn7l2 PE=1 SV=1;tr|Q8C8K6|Q8C8K6_MOUSE Ataxin 7-like 2 OS=Mus musculus OX=10090 GN=Atxn7l2 PE=1 SV=1;tr|B7ZCC3|B7ZCC3_MOUSE Ataxin 7-like 2 OS=Mus musculus OX=10090 GN=Atxn7l2 PE=1 SV=1	B7ZCC4;Q8C8K6;B7ZCC3		Atxn7l2	0	0	0	399	366	197	0	163		0	0	0	403	0	233	1448	0	136		medium	4	4	12
	sp|A2AWT3|AT7L3_MOUSE Ataxin-7-like protein 3 OS=Mus musculus OX=10090 GN=Atxn7l3 PE=1 SV=1;sp|A2AWT3-2|AT7L3_MOUSE Isoform 2 of Ataxin-7-like protein 3 OS=Mus musculus OX=10090 GN=Atxn7l3	A2AWT3;A2AWT3-2	Ataxin-7-like protein 3	Atxn7l3	0	0	0	3518	3320	0	2674	0		1204	0	0	860	2972	422	615	0	0		medium	5	5	20.7
	tr|E9PUQ3|E9PUQ3_MOUSE NKAP domain-containing 1 OS=Mus musculus OX=10090 GN=Nkapd1 PE=1 SV=1;tr|D3YWF5|D3YWF5_MOUSE NKAP domain-containing 1 OS=Mus musculus OX=10090 GN=Nkapd1 PE=1 SV=1;tr|D3Z5E5|D3Z5E5_MOUSE NKAP domain-containing 1 (Fragment) OS=Mus musc	E9PUQ3;D3YWF5;D3Z5E5;D3YU88		AU019823	376	823	1156	0	4335	7071	6221	3817		317	706	1059	13241	11879	24630	5899	10862	12879		medium	4	4	16.1
	sp|Q9JLZ3|AUHM_MOUSE Methylglutaconyl-CoA hydratase, mitochondrial OS=Mus musculus OX=10090 GN=Auh PE=1 SV=1	Q9JLZ3;Q9JLZ3-3;Q9JLZ3-2	Methylglutaconyl-CoA hydratase, mitochondrial	Auh	9624	8503	10580	8260	8979	5138	4546	6512		10962	9940	13154	6152	12327	12010	6167	7543	6599		high	13	13	38.9
	sp|E9Q6Z5|AUNIP_MOUSE Aurora kinase A and ninein-interacting protein OS=Mus musculus OX=10090 GN=Aunip PE=2 SV=1	E9Q6Z5	Aurora kinase A and ninein-interacting protein	Aunip	0	0	0	0	0	761	0	0		0	0	0	1086	678	1871	1007	0	0		low	2	2	11.2
	sp|P70295|AUP1_MOUSE Ancient ubiquitous protein 1 OS=Mus musculus OX=10090 GN=Aup1 PE=1 SV=1	P70295	Ancient ubiquitous protein 1	Aup1	5622	3616	4844	16383	17509	4250	18206	21514		6474	7096	8432	35226	31981	6654	20237	29878	19669		high	12	12	32.4
	sp|P97477|AURKA_MOUSE Aurora kinase A OS=Mus musculus OX=10090 GN=Aurka PE=1 SV=1;sp|P97477-2|AURKA_MOUSE Isoform 2 of Aurora kinase A OS=Mus musculus OX=10090 GN=Aurka	P97477;P97477-2	Aurora kinase A	Aurka	0	0	0	12853	11307	10809	4233	1307		0	0	0	33897	42640	42139	30507	31524	25189		high	11	11	37.7
	sp|Q9DCJ7|AKIP_MOUSE Aurora kinase A-interacting protein OS=Mus musculus OX=10090 GN=Aurkaip1 PE=2 SV=2	Q9DCJ7	Aurora kinase A-interacting protein	Aurkaip1	953	1266	1100	0	18935	12773	0	0		0	2127	0	0	0	13820	0	19842	0		low	1	1	5
	sp|O70126|AURKB_MOUSE Aurora kinase B OS=Mus musculus OX=10090 GN=Aurkb PE=1 SV=2	O70126	Aurora kinase B	Aurkb	0	0	0	66357	36668	35011	19037	23923		0	0	0	130294	124052	131858	88480	152785	75065		high	17	16	57.7
	sp|Q9D9K3|AVEN_MOUSE Cell death regulator Aven OS=Mus musculus OX=10090 GN=Aven PE=1 SV=2	Q9D9K3	Cell death regulator Aven	Aven	902	541	739	46541	33530	32975	31383	27202		937	1724	1158	43973	38759	45572	28570	34063	46779		high	11	11	43.3
	sp|Q80U56|AVL9_MOUSE Late secretory pathway protein AVL9 homolog OS=Mus musculus OX=10090 GN=Avl9 PE=1 SV=2	Q80U56	Late secretory pathway protein AVL9 homolog	Avl9	412	560	802	8023	3806	2639	3556	4476		977	598	733	5447	6621	3808	3187	5434	1401		high	14	14	29.7
	sp|O35625-2|AXIN1_MOUSE Isoform 2 of Axin-1 OS=Mus musculus OX=10090 GN=Axin1;sp|O35625|AXIN1_MOUSE Axin-1 OS=Mus musculus OX=10090 GN=Axin1 PE=1 SV=3	O35625-2;O35625	Axin-1	Axin1	115	98	37	187	0	0	112	0		109	44	197	345	482	416	254	148	0		medium	6	6	11.4
	sp|Q9QYP6|AZI2_MOUSE 5-azacytidine-induced protein 2 OS=Mus musculus OX=10090 GN=Azi2 PE=1 SV=1;sp|Q9QYP6-2|AZI2_MOUSE Isoform 2 of 5-azacytidine-induced protein 2 OS=Mus musculus OX=10090 GN=Azi2	Q9QYP6;Q9QYP6-2;Q9QYP6-3	5-azacytidine-induced protein 2	Azi2	0	0	0	634	846	0	2559	2131		0	0	91	693	1573	0	927	0	63		medium	6	6	20.2
	sp|P01887|B2MG_MOUSE Beta-2-microglobulin OS=Mus musculus OX=10090 GN=B2m PE=1 SV=2	P01887	Beta-2-microglobulin	B2m	15866	9987	33367	55379	52848	2487	36582	4007		33224	73636	66397	140574	83981	7104	40995	83277	29756		medium	6	6	53.8
	sp|Q8BG28|B3GL2_MOUSE UDP-GalNAc:beta-1,3-N-acetylgalactosaminyltransferase 2 OS=Mus musculus OX=10090 GN=B3galnt2 PE=1 SV=1	Q8BG28	UDP-GalNAc:beta-1,3-N-acetylgalactosaminyltransferase 2	B3galnt2	0	0	132	233	0	0	0	0		0	0	262	242	247	0	0	0	0		low	2	2	4.8
	sp|Q9Z0F0|B3GT4_MOUSE Beta-1,3-galactosyltransferase 4 OS=Mus musculus OX=10090 GN=B3galt4 PE=1 SV=1	Q9Z0F0	Beta-1,3-galactosyltransferase 4	B3galt4	383	131	137	0	0	0	0	0		0	0	0	0	0	0	0	0	0		medium	3	3	8.6
	sp|Q91Z92|B3GT6_MOUSE Beta-1,3-galactosyltransferase 6 OS=Mus musculus OX=10090 GN=B3galt6 PE=2 SV=1	Q91Z92	Beta-1,3-galactosyltransferase 6	B3galt6	346	81	126	1018	1470	1914	1251	1093		959	0	841	1556	3424	70	6448	775	285		high	9	9	33.5
	sp|Q8BHT6|B3GLT_MOUSE Beta-1,3-glucosyltransferase OS=Mus musculus OX=10090 GN=B3glct PE=1 SV=3	Q8BHT6	Beta-1,3-glucosyltransferase	B3galtl	77	0	0	0	0	379	0	0		0	238	158	1374	914	630	0	675	537		medium	3	3	9.8
	sp|P58158|B3GA3_MOUSE Galactosylgalactosylxylosylprotein 3-beta-glucuronosyltransferase 3 OS=Mus musculus OX=10090 GN=B3gat3 PE=1 SV=1	P58158	Galactosylgalactosylxylosylprotein 3-beta-glucuronosyltransferase 3	B3gat3	0	0	66315	437	0	0	0	0		0	153	183	1381	866	444	279	0	443		medium	5	5	20
	sp|Q9Z222|B3GN2_MOUSE N-acetyllactosaminide beta-1,3-N-acetylglucosaminyltransferase 2 OS=Mus musculus OX=10090 GN=B3GNT2 PE=1 SV=3	Q9Z222	N-acetyllactosaminide beta-1,3-N-acetylglucosaminyltransferase 2	B3GNT2	57	83	0	5077	5799	5103	1592	7714		0	0	0	5872	3893	6883	2974	5826	4877		high	9	9	32
	sp|Q09200|B4GN1_MOUSE Beta-1,4 N-acetylgalactosaminyltransferase 1 OS=Mus musculus OX=10090 GN=B4galnt1 PE=1 SV=1	Q09200	Beta-1,4 N-acetylgalactosaminyltransferase 1	B4galnt1	9678	12594	10352	120320	124461	87736	92788	73476		26518	29199	33885	104323	88778	125002	80538	105312	110495		high	30	30	59.3
	sp|P15535-2|B4GT1_MOUSE Isoform Short of Beta-1,4-galactosyltransferase 1 OS=Mus musculus OX=10090 GN=B4galt1;sp|P15535|B4GT1_MOUSE Beta-1,4-galactosyltransferase 1 OS=Mus musculus OX=10090 GN=B4galt1 PE=1 SV=1	P15535-2;P15535	Beta-1,4-galactosyltransferase 1;Lactose synthase A protein;N-acetyllactosamine synthase;Beta-N-acetylglucosaminylglycopeptide beta-1,4-galactosyltransferase;Beta-N-acetylglucosaminyl-glycolipid beta-1,4-galactosyltransferase;Processed beta-1,4-galactosyltransferase 1	B4galt1	0	0	0	3192	0	3529	1210	3172		443	0	568	5051	3116	0	0	3115	2714		medium	6	6	24.6
	sp|Q3UI43|BABA1_MOUSE BRISC and BRCA1-A complex member 1 OS=Mus musculus OX=10090 GN=Babam1 PE=1 SV=1	Q3UI43	BRISC and BRCA1-A complex member 1	Babam1	7271	7951	9410	60800	46868	39378	58310	41958		13379	14460	11874	31753	65540	38503	36475	74720	40622		high	14	14	69.7
	sp|P97302|BACH1_MOUSE Transcription regulator protein BACH1 OS=Mus musculus OX=10090 GN=Bach1 PE=1 SV=1	P97302	Transcription regulator protein BACH1	Bach1	450	77	55	0	0	0	0	0		191	340	76	0	0	0	0	0	0		medium	6	6	9.5
	sp|P97303|BACH2_MOUSE Transcription regulator protein BACH2 OS=Mus musculus OX=10090 GN=Bach2 PE=1 SV=3;sp|P97303-2|BACH2_MOUSE Isoform 2 of Transcription regulator protein BACH2 OS=Mus musculus OX=10090 GN=Bach2	P97303;P97303-2	Transcription regulator protein BACH2	Bach2	819	1415	1395	25986	12736	14268	9256	14216		1123	1234	1261	12536	15918	11849	7983	18665	9784		high	24	24	40.9
	sp|Q60739|BAG1_MOUSE BAG family molecular chaperone regulator 1 OS=Mus musculus OX=10090 GN=Bag1 PE=1 SV=3;sp|Q60739-2|BAG1_MOUSE Isoform 2 of BAG family molecular chaperone regulator 1 OS=Mus musculus OX=10090 GN=Bag1	Q60739;Q60739-2	BAG family molecular chaperone regulator 1	Bag1	3285	3828	4356	45074	36908	51552	28125	43808		2378	6328	5013	30616	37627	33085	46726	51259	19897		high	14	14	49.9
	sp|Q91YN9|BAG2_MOUSE BAG family molecular chaperone regulator 2 OS=Mus musculus OX=10090 GN=Bag2 PE=1 SV=1	Q91YN9	BAG family molecular chaperone regulator 2	Bag2	0	0	0	14580	7655	3846	7986	1826		0	0	0	58380	32800	56764	31976	43108	27333		high	12	12	67.1
	sp|Q8CI32|BAG5_MOUSE BAG family molecular chaperone regulator 5 OS=Mus musculus OX=10090 GN=Bag5 PE=1 SV=1	Q8CI32	BAG family molecular chaperone regulator 5	Bag5	7917	5640	6398	48737	45228	134448	170618	74788		8560	7659	6344	57466	109666	153088	85339	51339	81976		high	21	21	51.9
	sp|Q9Z1R2|BAG6_MOUSE Large proline-rich protein BAG6 OS=Mus musculus OX=10090 GN=Bag6 PE=1 SV=1	Q9Z1R2	Large proline-rich protein BAG6	Bag6	178	1137	1239	85715	42935	40502	29241	48451		338	1022	1104	59186	60690	65811	28076	65553	30965		high	34	34	36.8
	sp|Q497V6|BAHD1_MOUSE Bromo adjacent homology domain-containing 1 protein OS=Mus musculus OX=10090 GN=Bahd1 PE=1 SV=1	Q497V6	Bromo adjacent homology domain-containing 1 protein	Bahd1	225	156	138	542	302	0	350	0		0	0	41	1047	1455	0	139	0	0		low	9	1	14.4
	sp|Q8BKX1-4|BAIP2_MOUSE Isoform 4 of Brain-specific angiogenesis inhibitor 1-associated protein 2 OS=Mus musculus OX=10090 GN=Baiap2;sp|Q8BKX1-3|BAIP2_MOUSE Isoform 3 of Brain-specific angiogenesis inhibitor 1-associated protein 2 OS=Mus musculus OX=10090	Q8BKX1-4;Q8BKX1-3;Q8BKX1-2;Q8BKX1	Brain-specific angiogenesis inhibitor 1-associated protein 2	Baiap2	0	0	378	4961	3144	2524	522	1983		124	0	105	10554	7625	9493	3490	7606	34393		high	16	16	39.4
	sp|O08734|BAK_MOUSE Bcl-2 homologous antagonist/killer OS=Mus musculus OX=10090 GN=Bak1 PE=1 SV=3	O08734	Bcl-2 homologous antagonist/killer	Bak1	4027	3154	5026	26745	7916	6223	3645	13255		9671	7365	16990	28114	30938	6654	17874	34785	9663		high	9	9	65.6
	sp|O54962|BAF_MOUSE Barrier-to-autointegration factor OS=Mus musculus OX=10090 GN=Banf1 PE=1 SV=1	O54962	Barrier-to-autointegration factor;Barrier-to-autointegration factor, N-terminally processed	Banf1	3614	5429	10985	87196	73663	53360	20921	35886		12902	15826	22994	192614	81563	64940	23027	56209	23252		medium	7	7	62.9
	sp|Q8VBU8-4|BANP_MOUSE Isoform 4 of Protein BANP OS=Mus musculus OX=10090 GN=Banp;sp|Q8VBU8-3|BANP_MOUSE Isoform 3 of Protein BANP OS=Mus musculus OX=10090 GN=Banp;sp|Q8VBU8-2|BANP_MOUSE Isoform 2 of Protein BANP OS=Mus musculus OX=10090 GN=Banp;sp|Q8VBU8|	Q8VBU8-4;Q8VBU8-3;Q8VBU8-2;Q8VBU8	Protein BANP	Banp	240	576	586	4028	1857	545	1465	2108		283	499	372	932	2064	2006	1359	2390	2939		medium	5	5	9.9
	sp|Q99PU7|BAP1_MOUSE Ubiquitin carboxyl-terminal hydrolase BAP1 OS=Mus musculus OX=10090 GN=Bap1 PE=1 SV=1	Q99PU7	Ubiquitin carboxyl-terminal hydrolase BAP1	Bap1	91	129	24	666	494	0	492	0		32	35	25	1068	338	0	0	394	0		high	9	9	15.4
	sp|Q9DCT6-2|BAP18_MOUSE Isoform 2 of Chromatin complexes subunit BAP18 OS=Mus musculus OX=10090 GN=Bap18;sp|Q9DCT6|BAP18_MOUSE Chromatin complexes subunit BAP18 OS=Mus musculus OX=10090 GN=Bap18 PE=1 SV=1	Q9DCT6-2;Q9DCT6;Q9DCT6-4;Q9DCT6-3	Chromatin complexes subunit BAP18	Bap18	0	338	469	10767	3599	2522	8350	5182		0	1975	517	5394	3029	0	2994	1685	1736		medium	5	5	46.8
	sp|O70445|BARD1_MOUSE BRCA1-associated RING domain protein 1 OS=Mus musculus OX=10090 GN=Bard1 PE=2 SV=1	O70445	BRCA1-associated RING domain protein 1	Bard1	0	0	0	4209	1551	1504	1716	159		0	0	0	10154	5542	5807	3969	3570	2661		high	15	15	32
	sp|Q91XV3|BASP1_MOUSE Brain acid soluble protein 1 OS=Mus musculus OX=10090 GN=Basp1 PE=1 SV=3	Q91XV3	Brain acid soluble protein 1	Basp1	0	0	0	0	0	0	0	0		0	0	0	2160	4807	0	0	0	0		low	2	2	16.4
	sp|O35284|BATF_MOUSE Basic leucine zipper transcriptional factor ATF-like OS=Mus musculus OX=10090 GN=Batf PE=1 SV=1	O35284	Basic leucine zipper transcriptional factor ATF-like	Batf	0	1396	1693	32920	24603	0	15286	23317		896	1822	2634	0	21330	28627	10210	17843	9918		low	2	1	16
	sp|Q07813|BAX_MOUSE Apoptosis regulator BAX OS=Mus musculus OX=10090 GN=Bax PE=1 SV=1	Q07813	Apoptosis regulator BAX	Bax	17960	9031	18638	341307	342628	308505	196640	358672		21280	27233	20324	430659	270885	420798	334263	486220	346411		high	10	10	58.3
	sp|O88379|BAZ1A_MOUSE Bromodomain adjacent to zinc finger domain protein 1A OS=Mus musculus OX=10090 GN=Baz1a PE=1 SV=3	O88379	Bromodomain adjacent to zinc finger domain protein 1A	Baz1a	1001	1108	772	33762	27140	21316	23336	19716		851	2208	1662	51615	42597	57373	35429	35716	33077		high	56	56	39.5
	sp|Q9Z277|BAZ1B_MOUSE Tyrosine-protein kinase BAZ1B OS=Mus musculus OX=10090 GN=Baz1b PE=1 SV=2;sp|Q9Z277-2|BAZ1B_MOUSE Isoform 2 of Tyrosine-protein kinase BAZ1B OS=Mus musculus OX=10090 GN=Baz1b	Q9Z277;Q9Z277-2	Tyrosine-protein kinase BAZ1B	Baz1b	14251	14332	14074	134368	101019	70881	81231	68727		14832	19322	19112	131789	127056	133640	103583	138126	103850		high	79	79	53.6
	sp|Q91YE5-2|BAZ2A_MOUSE Isoform 2 of Bromodomain adjacent to zinc finger domain protein 2A OS=Mus musculus OX=10090 GN=Baz2a;sp|Q91YE5|BAZ2A_MOUSE Bromodomain adjacent to zinc finger domain protein 2A OS=Mus musculus OX=10090 GN=Baz2a PE=1 SV=2;sp|Q91YE5-3	Q91YE5-2;Q91YE5;Q91YE5-3	Bromodomain adjacent to zinc finger domain protein 2A	Baz2a	360	576	338	1828	1164	1049	944	1305		254	355	384	1674	1777	1989	1289	1770	759		high	29	29	20.3
	tr|A2AUY4|A2AUY4_MOUSE Bromodomain adjacent to zinc finger domain, 2B OS=Mus musculus OX=10090 GN=Baz2b PE=1 SV=1	A2AUY4;A2AUY3		Baz2b	0	0	0	2137	59	0	0	0		0	0	0	54	0	0	0	0	251		medium	4	4	2.8
	sp|Q8VBW5|BBX_MOUSE HMG box transcription factor BBX OS=Mus musculus OX=10090 GN=Bbx PE=1 SV=2;sp|Q8VBW5-2|BBX_MOUSE Isoform 2 of HMG box transcription factor BBX OS=Mus musculus OX=10090 GN=Bbx;sp|Q8VBW5-3|BBX_MOUSE Isoform 3 of HMG box transcription fact	Q8VBW5;Q8VBW5-2;Q8VBW5-3;Q8VBW5-4	HMG box transcription factor BBX	Bbx	433	83	186	1552	1102	645	1866	2301		64	283	404	1144	907	472	1374	1183	732		high	10	10	16
	sp|Q8R2U2|NEPRO_MOUSE Nucleolus and neural progenitor protein OS=Mus musculus OX=10090 GN=Nepro PE=2 SV=1	Q8R2U2		BC027231	1975	2230	1901	2133	3456	3471	3580	2000		2817	2338	2677	12936	6692	6447	10673	10863	4063		high	15	15	32.4
	sp|Q61334|BAP29_MOUSE B-cell receptor-associated protein 29 OS=Mus musculus OX=10090 GN=Bcap29 PE=1 SV=1	Q61334	B-cell receptor-associated protein 29	Bcap29	12943	8915	9921	112586	31296	21887	76822	45734		11676	18208	26723	141580	129138	67742	192901	91611	23863		high	11	11	38.3
	sp|Q61335|BAP31_MOUSE B-cell receptor-associated protein 31 OS=Mus musculus OX=10090 GN=Bcap31 PE=1 SV=4	Q61335	B-cell receptor-associated protein 31	Bcap31	71785	54348	61040	465662	247824	273112	140480	270630		80163	83591	84253	331047	283651	274953	399730	265664	251035		high	15	15	51.4
	sp|Q9D287|SPF27_MOUSE Pre-mRNA-splicing factor SPF27 OS=Mus musculus OX=10090 GN=Bcas2 PE=1 SV=1	Q9D287	Pre-mRNA-splicing factor SPF27	Bcas2	493	3174	5452	32917	21875	14558	24865	15786		5794	10745	11167	76534	36936	37064	34025	41319	9504		high	15	15	72.4
	sp|Q8CCN5|BCAS3_MOUSE Breast carcinoma-amplified sequence 3 homolog OS=Mus musculus OX=10090 GN=Bcas3 PE=1 SV=2;sp|Q8CCN5-2|BCAS3_MOUSE Isoform 2 of Breast carcinoma-amplified sequence 3 homolog OS=Mus musculus OX=10090 GN=Bcas3	Q8CCN5;Q8CCN5-2	Breast carcinoma-amplified sequence 3 homolog	Bcas3	98	497	218	1384	1763	0	1311	1965		795	597	270	504	1867	1143	1053	1622	640		high	15	15	21.2
	sp|P24288|BCAT1_MOUSE Branched-chain-amino-acid aminotransferase, cytosolic OS=Mus musculus OX=10090 GN=Bcat1 PE=1 SV=2	P24288	Branched-chain-amino-acid aminotransferase, cytosolic	Bcat1	0	0	0	96553	137663	122092	45661	108535		0	0	0	144502	175531	235807	116279	143863	211502		high	15	15	44.6
	sp|O35855|BCAT2_MOUSE Branched-chain-amino-acid aminotransferase, mitochondrial OS=Mus musculus OX=10090 GN=Bcat2 PE=1 SV=2	O35855	Branched-chain-amino-acid aminotransferase, mitochondrial	Bcat2	19129	17140	23595	132755	91826	82909	51776	86777		10978	11416	11644	56547	50990	89162	39659	59924	51300		high	19	19	46.6
	sp|Q9CWI3|BCCIP_MOUSE BRCA2 and CDKN1A-interacting protein OS=Mus musculus OX=10090 GN=Bccip PE=1 SV=1	Q9CWI3	BRCA2 and CDKN1A-interacting protein	Bccip	5768	9039	4704	150639	119271	95443	81353	97319		16398	17626	11488	156906	144519	151931	130313	105028	87915		high	14	14	50.6
	sp|Q91YP1|BN3D2_MOUSE RNA 5-monophosphate methyltransferase OS=Mus musculus OX=10090 GN=Bcdin3d PE=2 SV=1	Q91YP1	Pre-miRNA 5-monophosphate methyltransferase	Bcdin3d	0	0	0	2581	1401	0	722	0		0	420	229	0	0	0	0	0	0		medium	4	4	24.2
	sp|P50136|ODBA_MOUSE 2-oxoisovalerate dehydrogenase subunit alpha, mitochondrial OS=Mus musculus OX=10090 GN=Bckdha PE=1 SV=1	P50136	2-oxoisovalerate dehydrogenase subunit alpha, mitochondrial	Bckdha	462	172	560	3109	636	454	4544	4021		502	1159	658	2878	1274	2595	3279	3176	2782		high	15	15	48.2
	sp|Q6P3A8|ODBB_MOUSE 2-oxoisovalerate dehydrogenase subunit beta, mitochondrial OS=Mus musculus OX=10090 GN=Bckdhb PE=1 SV=2;sp|Q6P3A8-2|ODBB_MOUSE Isoform 2 of 2-oxoisovalerate dehydrogenase subunit beta, mitochondrial OS=Mus musculus OX=10090 GN=Bckdhb	Q6P3A8;Q6P3A8-2	2-oxoisovalerate dehydrogenase subunit beta, mitochondrial	Bckdhb	1256	86	1333	8676	5177	5546	7415	6900		1057	490	4166	3492	2369	5150	5985	2043	6610		high	9	9	35.9
	sp|O55028|BCKD_MOUSE [3-methyl-2-oxobutanoate dehydrogenase [lipoamide]] kinase, mitochondrial OS=Mus musculus OX=10090 GN=Bckdk PE=1 SV=1	O55028	[3-methyl-2-oxobutanoate dehydrogenase [lipoamide]] kinase, mitochondrial	Bckdk	543	147	417	5070	1792	1437	7189	3893		94	306	92	7553	8623	3132	2013	3423	617		high	11	11	33.5
	sp|Q9Z0H7|BCL10_MOUSE B-cell lymphoma/leukemia 10 OS=Mus musculus OX=10090 GN=Bcl10 PE=1 SV=1	Q9Z0H7	B-cell lymphoma/leukemia 10	Bcl10	0	0	0	4574	1292	0	0	0		415	0	0	7113	6009	1807	3641	3783	1274		medium	5	5	25.3
	sp|Q99PV8-2|BC11B_MOUSE Isoform 2 of B-cell lymphoma/leukemia 11B OS=Mus musculus OX=10090 GN=Bcl11b;sp|Q99PV8|BC11B_MOUSE B-cell lymphoma/leukemia 11B OS=Mus musculus OX=10090 GN=Bcl11b PE=1 SV=1;sp|Q99PV8-3|BC11B_MOUSE Isoform 3 of B-cell lymphoma/leukem	Q99PV8-2;Q99PV8;Q99PV8-3;Q9QYE3-12;Q9QYE3-10;Q9QYE3-16;Q9QYE3	B-cell lymphoma/leukemia 11B	Bcl11b	10470	10716	8787	26623	20420	9868	15172	13643		3184	13565	7807	13173	13865	7422	9634	11453	5687		high	33	33	51.8
	sp|P10417-2|BCL2_MOUSE Isoform Beta of Apoptosis regulator Bcl-2 OS=Mus musculus OX=10090 GN=Bcl2;sp|P10417|BCL2_MOUSE Apoptosis regulator Bcl-2 OS=Mus musculus OX=10090 GN=Bcl2 PE=1 SV=3	P10417-2;P10417	Apoptosis regulator Bcl-2	Bcl2	792	0	531	24013	24723	16641	30209	20728		1460	3143	2870	26991	10025	77951	25013	48204	15124		medium	4	4	44.7
	sp|Q07440|B2LA1_MOUSE Bcl-2-related protein A1 OS=Mus musculus OX=10090 GN=Bcl2a1 PE=1 SV=1	Q07440	Bcl-2-related protein A1	Bcl2a1	0	0	0	4714	4825	5078	4046	4510		0	0	0	2300	3452	0	3774	1527	11615		low	2	2	15.1
	sp|Q64373-3|B2CL1_MOUSE Isoform Bcl-X(beta) of Bcl-2-like protein 1 OS=Mus musculus OX=10090 GN=Bcl2l1;sp|Q64373-4|B2CL1_MOUSE Isoform Bcl-X(delta-TM) of Bcl-2-like protein 1 OS=Mus musculus OX=10090 GN=Bcl2l1;sp|Q64373|B2CL1_MOUSE Bcl-2-like protein 1 OS=	Q64373-3;Q64373-4;Q64373;Q64373-2	Bcl-2-like protein 1	Bcl2l1	0	0	0	44819	24834	43362	56694	44774		0	0	0	60141	55534	73345	42254	76096	50382		medium	7	7	33.5
	sp|O54918|B2L11_MOUSE Bcl-2-like protein 11 OS=Mus musculus OX=10090 GN=Bcl2l11 PE=1 SV=1;sp|O54918-3|B2L11_MOUSE Isoform BimS of Bcl-2-like protein 11 OS=Mus musculus OX=10090 GN=Bcl2l11;sp|O54918-2|B2L11_MOUSE Isoform BimL of Bcl-2-like protein 11 OS=Mus	O54918;O54918-3;O54918-2	Bcl-2-like protein 11	Bcl2l11	0	0	0	1349	0	0	0	876		0	991	513	7687	0	407	594	3765	0		medium	3	3	16.8
	sp|P59017|B2L13_MOUSE Bcl-2-like protein 13 OS=Mus musculus OX=10090 GN=Bcl2l13 PE=1 SV=2	P59017	Bcl-2-like protein 13	Bcl2l13	3623	4958	5926	22566	14761	5106	15276	15381		8632	7275	9656	30032	34189	32918	25022	25885	17284		high	12	12	46.5
	sp|Q9CXE2|BCL7A_MOUSE B-cell CLL/lymphoma 7 protein family member A OS=Mus musculus OX=10090 GN=Bcl7a PE=2 SV=1;sp|Q9CXE2-2|BCL7A_MOUSE Isoform 2 of B-cell CLL/lymphoma 7 protein family member A OS=Mus musculus OX=10090 GN=Bcl7a	Q9CXE2;Q9CXE2-2	B-cell CLL/lymphoma 7 protein family member A	Bcl7a	440	1246	1344	0	0	1194	984	0		0	743	0	3689	7306	0	0	0	0		low	2	2	21.9
	sp|Q921K9|BCL7B_MOUSE B-cell CLL/lymphoma 7 protein family member B OS=Mus musculus OX=10090 GN=Bcl7b PE=1 SV=1;sp|Q921K9-2|BCL7B_MOUSE Isoform 2 of B-cell CLL/lymphoma 7 protein family member B OS=Mus musculus OX=10090 GN=Bcl7b	Q921K9;Q921K9-2	B-cell CLL/lymphoma 7 protein family member B	Bcl7b	10784	13004	19111	19178	14391	25074	12484	12102		14359	28568	22058	37764	55218	11557	20005	34332	33211		medium	7	4	48.5
	sp|O08664|BCL7C_MOUSE B-cell CLL/lymphoma 7 protein family member C OS=Mus musculus OX=10090 GN=Bcl7c PE=1 SV=1	O08664	B-cell CLL/lymphoma 7 protein family member C	Bcl7c	1435	1212	776	22554	30144	9257	1772	25537		1707	427	697	19043	18271	14778	3318	20213	15431		medium	5	5	47
	sp|Q8K019|BCLF1_MOUSE Bcl-2-associated transcription factor 1 OS=Mus musculus OX=10090 GN=Bclaf1 PE=1 SV=2;sp|Q8K019-2|BCLF1_MOUSE Isoform 2 of Bcl-2-associated transcription factor 1 OS=Mus musculus OX=10090 GN=Bclaf1;sp|Q8K019-3|BCLF1_MOUSE Isoform 3 of	Q8K019;Q8K019-2;Q8K019-3	Bcl-2-associated transcription factor 1	Bclaf1	31564	32567	32466	205146	103070	113441	110435	91695		41960	50238	46244	210363	192747	162959	133733	183737	154017		high	44	44	41
	sp|Q8CGN4-3|BCOR_MOUSE Isoform 3 of BCL-6 corepressor OS=Mus musculus OX=10090 GN=Bcor;sp|Q8CGN4|BCOR_MOUSE BCL-6 corepressor OS=Mus musculus OX=10090 GN=Bcor PE=1 SV=2;sp|Q8CGN4-4|BCOR_MOUSE Isoform 4 of BCL-6 corepressor OS=Mus musculus OX=10090 GN=Bcor;	Q8CGN4-3;Q8CGN4;Q8CGN4-4;Q8CGN4-2	BCL-6 corepressor	Bcor	100	157	207	3114	2341	1741	2022	2666		85	78	98	2039	2492	3336	1326	3013	555		high	35	34	27.1
	sp|Q6PAJ1|BCR_MOUSE Breakpoint cluster region protein OS=Mus musculus OX=10090 GN=Bcr PE=1 SV=3	Q6PAJ1	Breakpoint cluster region protein	Bcr	46	30	23	199	369	99	115	0		112	68	80	86	0	378	74	0	326		high	11	11	12.2
	sp|Q9CZP5|BCS1_MOUSE Mitochondrial chaperone BCS1 OS=Mus musculus OX=10090 GN=Bcs1l PE=1 SV=1	Q9CZP5	Mitochondrial chaperone BCS1	Bcs1l	379	1033	835	18338	18315	13610	15240	13507		765	684	2173	14370	16632	13200	8328	17107	11393		high	18	18	54.1
	sp|Q80XN0|BDH_MOUSE D-beta-hydroxybutyrate dehydrogenase, mitochondrial OS=Mus musculus OX=10090 GN=Bdh1 PE=1 SV=2	Q80XN0	D-beta-hydroxybutyrate dehydrogenase, mitochondrial	Bdh1	18264	26373	31307	196579	165570	118108	178009	135680		18589	27111	26095	136208	152747	150574	179050	145150	101241		high	20	20	55.1
	sp|Q571C7|BDP1_MOUSE Transcription factor TFIIIB component B homolog OS=Mus musculus OX=10090 GN=Bdp1 PE=2 SV=2;sp|Q571C7-2|BDP1_MOUSE Isoform 2 of Transcription factor TFIIIB component B homolog OS=Mus musculus OX=10090 GN=Bdp1	Q571C7;Q571C7-2	Transcription factor TFIIIB component B homolog	Bdp1	24	35	46	592	177	45	104	207		0	38	48	431	796	535	110	599	135		high	17	17	11.9
	sp|O88597|BECN1_MOUSE Beclin-1 OS=Mus musculus OX=10090 GN=Becn1 PE=1 SV=3	O88597	Beclin-1	Becn1	1826	2245	3358	14624	8716	9610	8595	8986		4264	4613	6707	14149	14409	16393	11219	13912	16070		high	17	17	45.5
	sp|Q6PAL0|BEND3_MOUSE BEN domain-containing protein 3 OS=Mus musculus OX=10090 GN=Bend3 PE=1 SV=1	Q6PAL0	BEN domain-containing protein 3	Bend3	0	0	0	2062	2590	2043	2111	3699		0	0	46	3353	4157	6452	4034	3480	2903		high	22	22	37.3
	sp|O35623|BET1_MOUSE BET1 homolog OS=Mus musculus OX=10090 GN=Bet1 PE=1 SV=1	O35623	BET1 homolog	Bet1	1663	981	774	13599	6918	0	0	1657		863	0	1869	7681	3943	55064	5993	0	0		medium	3	3	56.8
	sp|O35153|BET1L_MOUSE BET1-like protein OS=Mus musculus OX=10090 GN=Bet1l PE=3 SV=1	O35153	BET1-like protein	Bet1l	4251	4217	3082	0	0	7740	0	1879		3263	7583	8286	0	0	21123	8443	8770	0		medium	4	4	46.8
	sp|Q8R079|BFAR_MOUSE Bifunctional apoptosis regulator OS=Mus musculus OX=10090 GN=Bfar PE=1 SV=1;sp|Q8R079-2|BFAR_MOUSE Isoform 2 of Bifunctional apoptosis regulator OS=Mus musculus OX=10090 GN=Bfar	Q8R079;Q8R079-2	Bifunctional apoptosis regulator	Bfar	0	0	0	666	542	403	0	1476		0	132	117	784	0	942	728	0	564		medium	6	6	16.9
	sp|Q6PB60|BHLH9_MOUSE Protein BHLHb9 OS=Mus musculus OX=10090 GN=Bhlhb9 PE=2 SV=1	Q6PB60	Protein BHLHb9	Bhlhb9	0	0	0	36578	30549	1743	657	1758		0	0	0	962	50241	733	2868	1784	1756		medium	7	7	19.7
	sp|O35185|BHE40_MOUSE Class E basic helix-loop-helix protein 40 OS=Mus musculus OX=10090 GN=Bhlhe40 PE=1 SV=1	O35185;Q99PV5	Class E basic helix-loop-helix protein 40	Bhlhe40	0	0	0	3877	8095	3396	3088	4993		0	0	0	3224	7167	18791	210	8801	3231		high	8	8	20.2
	sp|Q921C5-2|BICD2_MOUSE Isoform 2 of Protein bicaudal D homolog 2 OS=Mus musculus OX=10090 GN=Bicd2;sp|Q921C5|BICD2_MOUSE Protein bicaudal D homolog 2 OS=Mus musculus OX=10090 GN=Bicd2 PE=1 SV=1	Q921C5-2;Q921C5;Q921C5-3	Protein bicaudal D homolog 2	Bicd2	656	1346	1224	31147	22672	18518	19173	20127		835	892	1296	32607	28208	31857	25797	36981	21447		high	39	36	51.2
	sp|P70444|BID_MOUSE BH3-interacting domain death agonist OS=Mus musculus OX=10090 GN=Bid PE=1 SV=2	P70444	BH3-interacting domain death agonist;BH3-interacting domain death agonist p15;BH3-interacting domain death agonist p13;BH3-interacting domain death agonist p11	Bid	0	0	141	48815	5019	8791	26618	15789		5510	3433	3731	24844	46540	31039	61427	63063	10183		high	8	8	61.5
	sp|O08539-2|BIN1_MOUSE Isoform 2 of Myc box-dependent-interacting protein 1 OS=Mus musculus OX=10090 GN=Bin1	O08539-2	Myc box-dependent-interacting protein 1	Bin1	46212	31704	37185	91774	85721	80251	61961	104292		56822	53187	46131	68441	78462	83150	72125	110704	75112		low	26	1	68.4
	sp|D3Z6Q9|BIN2_MOUSE Bridging integrator 2 OS=Mus musculus OX=10090 GN=Bin2 PE=1 SV=1	D3Z6Q9;Q7TQF7	Bridging integrator 2	Bin2	97359	111301	99855	275599	251208	189850	129415	243179		158997	212933	190842	246501	231420	238470	217760	227743	206429		high	28	27	54.4
	sp|Q62210|BIRC2_MOUSE Baculoviral IAP repeat-containing protein 2 OS=Mus musculus OX=10090 GN=Birc2 PE=1 SV=1	Q62210	Baculoviral IAP repeat-containing protein 2	Birc2	568	731	768	1380	1069	0	992	650		891	1000	1024	960	1791	1142	2026	1109	576		high	12	12	20.3
	sp|O70201-2|BIRC5_MOUSE Isoform 2 of Baculoviral IAP repeat-containing protein 5 OS=Mus musculus OX=10090 GN=Birc5;sp|O70201|BIRC5_MOUSE Baculoviral IAP repeat-containing protein 5 OS=Mus musculus OX=10090 GN=Birc5 PE=1 SV=1	O70201-2;O70201	Baculoviral IAP repeat-containing protein 5	Birc5	0	0	0	0	0	0	0	0		0	0	0	2393	3037	0	0	0	0		low	2	2	34.7
	sp|O88738|BIRC6_MOUSE Baculoviral IAP repeat-containing protein 6 OS=Mus musculus OX=10090 GN=Birc6 PE=1 SV=2;sp|O88738-3|BIRC6_MOUSE Isoform 3 of Baculoviral IAP repeat-containing protein 6 OS=Mus musculus OX=10090 GN=Birc6;sp|O88738-2|BIRC6_MOUSE Isoform	O88738;O88738-3;O88738-2	Baculoviral IAP repeat-containing protein 6	Birc6	784	1044	974	16345	11246	7741	8721	9321		1132	1201	1416	17640	16562	19290	13676	20155	13148		high	116	116	36.7
	sp|Q8VD62|CK068_MOUSE UPF0696 protein C11orf68 homolog OS=Mus musculus OX=10090 GN=Bles03 PE=1 SV=2	Q8VD62;Q8VD62-1	UPF0696 protein C11orf68 homolog	Bles03	319	1518	2868	2123	2219	0	0	12956		961	2688	2380	5950	7244	1410	3424	4679	6024		high	9	9	36.6
	sp|O88700|BLM_MOUSE Bloom syndrome protein homolog OS=Mus musculus OX=10090 GN=Blm PE=1 SV=1	O88700	Bloom syndrome protein homolog	Blm	0	0	0	11180	5399	6376	4405	6382		46	87	130	19563	20522	19047	12865	17866	13111		high	47	47	50.2
	sp|Q8R016|BLMH_MOUSE Bleomycin hydrolase OS=Mus musculus OX=10090 GN=Blmh PE=1 SV=1	Q8R016	Bleomycin hydrolase	Blmh	17611	22953	18728	194676	150603	132700	117564	150104		26489	40526	39837	183431	193521	237167	192538	199115	156471		high	34	34	74.7
	sp|O55102|BL1S1_MOUSE Biogenesis of lysosome-related organelles complex 1 subunit 1 OS=Mus musculus OX=10090 GN=Bloc1s1 PE=1 SV=2	O55102	Biogenesis of lysosome-related organelles complex 1 subunit 1	Bloc1s1	0	5418	0	0	0	0	0	0		0	0	0	10511	6305	6244	9299	4034	1854		medium	4	4	39.2
	sp|Q5U5M8|BL1S3_MOUSE Biogenesis of lysosome-related organelles complex 1 subunit 3 OS=Mus musculus OX=10090 GN=Bloc1s3 PE=1 SV=1	Q5U5M8	Biogenesis of lysosome-related organelles complex 1 subunit 3	Bloc1s3	487	0	0	6997	8231	1505	0	6876		0	0	0	3642	3108	5342	2375	6614	0		medium	7	7	41
	sp|Q8VED2|BL1S4_MOUSE Biogenesis of lysosome-related organelles complex 1 subunit 4 OS=Mus musculus OX=10090 GN=Bloc1s4 PE=1 SV=1	Q8VED2	Biogenesis of lysosome-related organelles complex 1 subunit 4	Bloc1s4	0	0	0	0	2486	0	545	2477		0	0	75	0	1516	1376	0	0	3079		medium	4	4	22.8
	sp|Q9R0C0|BL1S6_MOUSE Biogenesis of lysosome-related organelles complex 1 subunit 6 OS=Mus musculus OX=10090 GN=Bloc1s6 PE=1 SV=1	Q9R0C0	Biogenesis of lysosome-related organelles complex 1 subunit 6	Bloc1s6	0	0	0	0	0	0	0	0		0	0	0	2410	0	4324	0	0	0		low	2	2	22.7
	sp|Q9CY64|BIEA_MOUSE Biliverdin reductase A OS=Mus musculus OX=10090 GN=Blvra PE=1 SV=1	Q9CY64	Biliverdin reductase A	Blvra	22979	26101	31354	550811	344927	280330	234899	443347		29920	29995	24953	357020	366986	315403	281581	368306	312434		high	17	17	55.3
	sp|Q923D2|BLVRB_MOUSE Flavin reductase (NADPH) OS=Mus musculus OX=10090 GN=Blvrb PE=1 SV=3	Q923D2	Flavin reductase (NADPH)	Blvrb	2045	3527	5254	9631	7965	3121	0	5821		1631	1940	3526	1284	1930	289	1842	9494	0		high	8	8	58.3
	sp|Q8R2X8|GO45_MOUSE Golgin-45 OS=Mus musculus OX=10090 GN=Blzf1 PE=1 SV=2;sp|Q8R2X8-2|GO45_MOUSE Isoform 2 of Golgin-45 OS=Mus musculus OX=10090 GN=Blzf1	Q8R2X8;Q8R2X8-2	Golgin-45	Blzf1	0	0	0	0	763	2503	1493	860		0	0	0	3323	2246	3842	2550	2856	1435		high	9	9	34
	sp|P25916|BMI1_MOUSE Polycomb complex protein BMI-1 OS=Mus musculus OX=10090 GN=Bmi1 PE=1 SV=1	P25916	Polycomb complex protein BMI-1	Bmi1	771	869	2115	9490	3162	10646	8418	13387		283	2579	1295	26829	30284	12652	18199	29140	34412		medium	5	4	25.3
	sp|Q91Z96|BMP2K_MOUSE BMP-2-inducible protein kinase OS=Mus musculus OX=10090 GN=Bmp2k PE=1 SV=1;sp|Q91Z96-2|BMP2K_MOUSE Isoform 2 of BMP-2-inducible protein kinase OS=Mus musculus OX=10090 GN=Bmp2k	Q91Z96;Q91Z96-2	BMP-2-inducible protein kinase	Bmp2k	41	122	62	1283	2159	2667	1494	2266		119	42	38	1867	1940	1342	1956	3133	969		high	16	16	22.6
	tr|Q6PGF5|Q6PGF5_MOUSE BMS1 homolog, ribosome assembly protein (Yeast) OS=Mus musculus OX=10090 GN=Bms1 PE=1 SV=1	Q6PGF5		Bms1	3409	3734	3467	73908	57445	47644	44799	54667		7482	7237	8106	94402	101371	137118	88849	76284	81567		high	56	56	43.2
	sp|Q6QD59|SEC20_MOUSE Vesicle transport protein SEC20 OS=Mus musculus OX=10090 GN=Bnip1 PE=1 SV=1	Q6QD59	Vesicle transport protein SEC20	Bnip1	127	0	0	59212	33146	27489	32385	40583		1266	352	172	49577	66523	57052	49770	64174	54375		high	16	16	64
	sp|O54940|BNIP2_MOUSE BCL2/adenovirus E1B 19 kDa protein-interacting protein 2 OS=Mus musculus OX=10090 GN=Bnip2 PE=1 SV=2	O54940	BCL2/adenovirus E1B 19 kDa protein-interacting protein 2	Bnip2	770	2090	897	1687	988	379	2485	2705		2165	503	5154	1289	1557	605	0	0	0		medium	5	4	13.5
	sp|Q9Z2F7|BNI3L_MOUSE BCL2/adenovirus E1B 19 kDa protein-interacting protein 3-like OS=Mus musculus OX=10090 GN=Bnip3l PE=1 SV=1	Q9Z2F7	BCL2/adenovirus E1B 19 kDa protein-interacting protein 3-like	Bnip3l	1027	0	0	1403	1165	0	5210	3530		484	0	0	1540	3948	0	2341	4088	0		medium	3	3	16.1
	sp|E9Q6J5|BD1L1_MOUSE Biorientation of chromosomes in cell division protein 1-like 1 OS=Mus musculus OX=10090 GN=Bod1l PE=1 SV=1;sp|E9Q6J5-3|BD1L1_MOUSE Isoform New of Biorientation of chromosomes in cell division protein 1-like 1 OS=Mus musculus OX=10090	E9Q6J5;E9Q6J5-3;E9Q6J5-2;Q5SQY2		Bod1l	1761	1437	1560	7732	5082	4630	5959	5957		1684	2900	2593	8507	6792	6178	9689	7672	5283		high	74	74	31.2
	sp|Q9D8S9|BOLA1_MOUSE BolA-like protein 1 OS=Mus musculus OX=10090 GN=Bola1 PE=1 SV=1	Q9D8S9	BolA-like protein 1	Bola1	0	0	232	3272	2567	0	0	0		0	0	527	7828	3332	1921	1512	5426	0		medium	5	5	61.3
	sp|Q8BGS2|BOLA2_MOUSE BolA-like protein 2 OS=Mus musculus OX=10090 GN=Bola2 PE=1 SV=1;sp|Q8BGS2-2|BOLA2_MOUSE Isoform 2 of BolA-like protein 2 OS=Mus musculus OX=10090 GN=Bola2	Q8BGS2;Q8BGS2-2	BolA-like protein 2	Bola2	11265	12620	15010	403103	172293	157810	110198	70694		47694	29366	36546	705916	393622	316297	829917	374862	78072		high	9	9	77.9
	sp|Q8CEI1|BOLA3_MOUSE BolA-like protein 3 OS=Mus musculus OX=10090 GN=Bola3 PE=1 SV=1	Q8CEI1	BolA-like protein 3	Bola3	0	633	0	988	0	2270	1212	1469		1015	0	0	6343	5031	4177	1493	657	2462		low	2	2	19.1
	sp|P97452|BOP1_MOUSE Ribosome biogenesis protein BOP1 OS=Mus musculus OX=10090 GN=Bop1 PE=1 SV=1	P97452	Ribosome biogenesis protein BOP1	Bop1	9075	9473	10249	214293	174093	155179	140648	112496		16037	18058	20208	298430	240904	286918	184296	215657	185623		high	33	33	63.5
	sp|Q8BS90|BORA_MOUSE Protein aurora borealis OS=Mus musculus OX=10090 GN=Bora PE=1 SV=1;sp|Q8BS90-2|BORA_MOUSE Isoform 2 of Protein aurora borealis OS=Mus musculus OX=10090 GN=Bora	Q8BS90;Q8BS90-2	Protein aurora borealis	Bora	0	0	0	3218	1875	622	770	756		0	0	0	2341	3513	3885	962	2544	1248		high	10	10	33
	sp|P15327|PMGE_MOUSE Bisphosphoglycerate mutase OS=Mus musculus OX=10090 GN=Bpgm PE=1 SV=2	P15327	Bisphosphoglycerate mutase	Bpgm	0	0	350	0	0	0	0	180		0	65	0	1492	0	1950	0	0	0		medium	3	3	16.2
	sp|Q8R164|BPHL_MOUSE Valacyclovir hydrolase OS=Mus musculus OX=10090 GN=Bphl PE=1 SV=1	Q8R164	Valacyclovir hydrolase	Bphl	5361	7764	11849	29927	31779	30434	35672	22094		5208	3362	4480	111457	14452	9091	7591	9595	11104		high	13	13	56
	sp|Q9Z0S1|BPNT1_MOUSE 3(2),5-bisphosphate nucleotidase 1 OS=Mus musculus OX=10090 GN=Bpnt1 PE=1 SV=2	Q9Z0S1	3(2),5-bisphosphate nucleotidase 1	Bpnt1	12336	14676	14705	130819	131339	57245	82330	76434		14890	21485	23893	139415	147745	290678	94084	121271	112356		high	18	18	76.6
	tr|E9Q6A7|E9Q6A7_MOUSE Bromodomain PHD finger transcription factor OS=Mus musculus OX=10090 GN=Bptf PE=1 SV=1	E9Q6A7		Bptf	1512	1850	1692	6283	4199	2951	4925	4392		1521	1790	1865	4482	4671	4764	4553	7669	2835		low	80	2	35.5
	sp|P28028|BRAF_MOUSE Serine/threonine-protein kinase B-raf OS=Mus musculus OX=10090 GN=Braf PE=1 SV=3;sp|P28028-2|BRAF_MOUSE Isoform 2 of Serine/threonine-protein kinase B-raf OS=Mus musculus OX=10090 GN=Braf	P28028;P28028-2	Serine/threonine-protein kinase B-raf	Braf	0	87	121	1229	895	1248	1071	432		252	201	255	2495	2393	4873	1216	3736	1024		medium	6	6	23.5
	sp|Q99MP8|BRAP_MOUSE BRCA1-associated protein OS=Mus musculus OX=10090 GN=Brap PE=1 SV=1;sp|Q99MP8-2|BRAP_MOUSE Isoform 2 of BRCA1-associated protein OS=Mus musculus OX=10090 GN=Brap;sp|Q99MP8-3|BRAP_MOUSE Isoform 3 of BRCA1-associated protein OS=Mus muscu	Q99MP8;Q99MP8-2;Q99MP8-3	BRCA1-associated protein	Brap	751	1202	1219	7867	4661	6727	5932	4227		819	2052	1761	6040	4965	3948	3068	4657	5415		high	22	22	50.6
	sp|Q8C3R1|BRAT1_MOUSE BRCA1-associated ATM activator 1 OS=Mus musculus OX=10090 GN=Brat1 PE=1 SV=1;sp|Q8C3R1-2|BRAT1_MOUSE Isoform 2 of BRCA1-associated ATM activator 1 OS=Mus musculus OX=10090 GN=Brat1	Q8C3R1;Q8C3R1-2	BRCA1-associated ATM activator 1	Brat1	37	63	15	6566	4886	4003	3532	3250		81	129	333	7396	5016	4896	3606	5666	5821		high	15	15	24.7
	sp|P48754|BRCA1_MOUSE Breast cancer type 1 susceptibility protein homolog OS=Mus musculus OX=10090 GN=Brca1 PE=1 SV=3	P48754	Breast cancer type 1 susceptibility protein homolog	Brca1	0	0	0	4386	1407	857	799	1312		0	0	0	6992	5696	5361	3328	5084	1209		high	35	35	32.8
	sp|P97929|BRCA2_MOUSE Breast cancer type 2 susceptibility protein homolog OS=Mus musculus OX=10090 GN=Brca2 PE=1 SV=2	P97929	Breast cancer type 2 susceptibility protein homolog	Brca2	0	0	0	96	80	0	155	33		0	0	28	189	164	215	89	117	58		high	16	16	6.8
	sp|P46737|BRCC3_MOUSE Lys-63-specific deubiquitinase BRCC36 OS=Mus musculus OX=10090 GN=Brcc3 PE=1 SV=1;sp|P46737-2|BRCC3_MOUSE Isoform 2 of Lys-63-specific deubiquitinase BRCC36 OS=Mus musculus OX=10090 GN=Brcc3	P46737;P46737-2	Lys-63-specific deubiquitinase BRCC36	Brcc3	15017	13980	14662	68081	59342	50073	42089	48183		18068	18879	21427	76197	50423	45430	50310	50269	62883		high	17	16	66
	sp|G5E8P1-2|BRD1_MOUSE Isoform 2 of Bromodomain-containing protein 1 OS=Mus musculus OX=10090 GN=Brd1	G5E8P1-2		Brd1	1023	1199	741	1718	2011	1573	894	824		921	1378	1006	2849	1669	1541	1443	3041	1071		low	29	3	30.7
	sp|G5E8P1|BRD1_MOUSE Bromodomain-containing protein 1 OS=Mus musculus OX=10090 GN=Brd1 PE=1 SV=1	G5E8P1		Brd1	25	103	124	0	0	0	0	0		0	0	55	0	0	0	0	0	0		low	1	1	32.6
	sp|Q7JJ13|BRD2_MOUSE Bromodomain-containing protein 2 OS=Mus musculus OX=10090 GN=Brd2 PE=1 SV=1;sp|Q7JJ13-2|BRD2_MOUSE Isoform 2 of Bromodomain-containing protein 2 OS=Mus musculus OX=10090 GN=Brd2	Q7JJ13;Q7JJ13-2	Bromodomain-containing protein 2	Brd2	8442	8593	8496	57760	49121	42068	31331	39468		6210	7615	8602	46668	52312	60434	47365	39407	41952		high	30	28	52.5
	sp|Q8K2F0|BRD3_MOUSE Bromodomain-containing protein 3 OS=Mus musculus OX=10090 GN=Brd3 PE=1 SV=2;sp|Q8K2F0-2|BRD3_MOUSE Isoform 2 of Bromodomain-containing protein 3 OS=Mus musculus OX=10090 GN=Brd3	Q8K2F0;Q8K2F0-2	Bromodomain-containing protein 3	Brd3	2891	4001	3725	25006	15584	12046	16313	17186		2385	4909	4061	15462	13942	17312	9198	17814	6562		high	16	16	40.5
	sp|Q9ESU6|BRD4_MOUSE Bromodomain-containing protein 4 OS=Mus musculus OX=10090 GN=Brd4 PE=1 SV=2;sp|Q9ESU6-2|BRD4_MOUSE Isoform 2 of Bromodomain-containing protein 4 OS=Mus musculus OX=10090 GN=Brd4	Q9ESU6;Q9ESU6-2;Q91Y44	Bromodomain-containing protein 4	Brd4	9947	11180	9788	35647	29098	24557	21834	28161		8989	14523	12884	23600	27474	39978	23688	29558	16903		high	51	41	35.9
	sp|O88665|BRD7_MOUSE Bromodomain-containing protein 7 OS=Mus musculus OX=10090 GN=Brd7 PE=1 SV=1	O88665	Bromodomain-containing protein 7	Brd7	1448	2223	1884	12532	9018	9178	5368	8986		2369	2256	2063	9493	8893	10965	8101	9731	4256		high	24	24	54.5
	sp|Q8R3B7|BRD8_MOUSE Bromodomain-containing protein 8 OS=Mus musculus OX=10090 GN=Brd8 PE=1 SV=2;sp|Q8R3B7-2|BRD8_MOUSE Isoform 2 of Bromodomain-containing protein 8 OS=Mus musculus OX=10090 GN=Brd8	Q8R3B7;Q8R3B7-2	Bromodomain-containing protein 8	Brd8	789	2234	1290	5942	2925	2074	5552	5824		777	2099	2140	3446	4419	5362	2096	3641	2084		high	27	27	36.2
	sp|Q3UQU0|BRD9_MOUSE Bromodomain-containing protein 9 OS=Mus musculus OX=10090 GN=Brd9 PE=1 SV=1	Q3UQU0	Bromodomain-containing protein 9	Brd9	2263	2702	2698	6588	6062	3889	6097	5040		3189	4346	3857	3395	4820	6111	4530	5214	7057		high	15	15	44.3
	sp|Q8K3W0|BABA2_MOUSE BRISC and BRCA1-A complex member 2 OS=Mus musculus OX=10090 GN=Babam2 PE=1 SV=2;sp|Q8K3W0-6|BABA2_MOUSE Isoform 5 of BRISC and BRCA1-A complex member 2 OS=Mus musculus OX=10090 GN=Babam2;sp|Q8K3W0-4|BABA2_MOUSE Isoform 3 of BRISC and	Q8K3W0;Q8K3W0-6;Q8K3W0-4	BRCA1-A complex subunit BRE	Bre	2108	2477	2999	20278	15144	13690	13819	5807		3231	3531	5570	23900	15485	15356	16237	13338	14680		low	16	3	60.1
	sp|Q8CFK2|TF3B_MOUSE Transcription factor IIIB 90 kDa subunit OS=Mus musculus OX=10090 GN=Brf1 PE=1 SV=1	Q8CFK2	Transcription factor IIIB 90 kDa subunit	Brf1	653	210	413	2164	2285	3030	2873	1950		0	246	0	1847	3741	6355	4356	3189	1849		high	15	15	30.9
	sp|Q8BXV2|BRI3B_MOUSE BRI3-binding protein OS=Mus musculus OX=10090 GN=Bri3bp PE=1 SV=1	Q8BXV2	BRI3-binding protein	Bri3bp	11022	6144	6311	185501	21531	42334	40749	48656		12028	5071	4529	106701	112012	49956	67908	115146	56476		medium	6	6	20.9
	sp|Q5SXJ3|FANCJ_MOUSE Fanconi anemia group J protein homolog OS=Mus musculus OX=10090 GN=Brip1 PE=2 SV=1	Q5SXJ3	Fanconi anemia group J protein homolog	Brip1	0	0	0	1826	1703	1176	1281	0		317	303	0	3062	3394	3060	3529	2072	1629		high	22	22	25.1
	sp|Q9DCA5|BRX1_MOUSE Ribosome biogenesis protein BRX1 homolog OS=Mus musculus OX=10090 GN=Brix1 PE=1 SV=3	Q9DCA5	Ribosome biogenesis protein BRX1 homolog	Brix1	29971	24550	26659	624918	530069	431008	358692	413765		31087	47453	44503	648404	665958	2176177	515542	545388	460785		high	23	23	64
	sp|Q99N20|BRMS1_MOUSE Breast cancer metastasis-suppressor 1 homolog OS=Mus musculus OX=10090 GN=Brms1 PE=2 SV=1	Q99N20	Breast cancer metastasis-suppressor 1 homolog	Brms1	2889	2756	2372	7106	4130	3806	3042	7235		3599	3628	3801	2884	6506	8474	10515	8043	1207		high	8	8	35.4
	sp|Q3U1T3|BRM1L_MOUSE Breast cancer metastasis-suppressor 1-like protein OS=Mus musculus OX=10090 GN=Brms1l PE=2 SV=1	Q3U1T3;Q3U1T3-2	Breast cancer metastasis-suppressor 1-like protein	Brms1l	2027	1845	1559	2481	2430	0	2556	2231		2471	1662	2146	3308	0	1482	2093	0	0		medium	7	7	31
	sp|Q8K2Q7|BROX_MOUSE BRO1 domain-containing protein BROX OS=Mus musculus OX=10090 GN=Brox PE=1 SV=1	Q8K2Q7;Q8K2Q7-2	BRO1 domain-containing protein BROX	Brox	253	296	424	8352	3710	13881	12665	12146		526	389	801	5863	4516	7248	5347	3378	2415		high	12	12	37
	sp|B2RRD7|BRPF1_MOUSE Peregrin OS=Mus musculus OX=10090 GN=Brpf1 PE=1 SV=1	B2RRD7		Brpf1	1199	1404	1130	5343	3890	3211	2371	4244		1143	1566	1720	3756	1924	3408	3198	3349	2336		high	29	28	25.8
	sp|B2KF05|BRPF3_MOUSE Bromodomain and PHD finger-containing protein 3 OS=Mus musculus OX=10090 GN=Brpf3 PE=1 SV=1;sp|B2KF05-2|BRPF3_MOUSE Isoform 2 of Bromodomain and PHD finger-containing protein 3 OS=Mus musculus OX=10090 GN=Brpf3	B2KF05;B2KF05-2		Brpf3	0	0	0	76	0	140	0	113		27	0	0	0	0	0	0	0	53		medium	5	5	8
	sp|Q5RJI5-4|BRSK1_MOUSE Isoform 4 of Serine/threonine-protein kinase BRSK1 OS=Mus musculus OX=10090 GN=Brsk1;sp|Q5RJI5-2|BRSK1_MOUSE Isoform 2 of Serine/threonine-protein kinase BRSK1 OS=Mus musculus OX=10090 GN=Brsk1;sp|Q5RJI5|BRSK1_MOUSE Serine/threonine	Q5RJI5-4;Q5RJI5-2;Q5RJI5	Serine/threonine-protein kinase BRSK1	Brsk1	0	0	0	0	0	0	1332	0		0	0	0	0	3809	7446	0	0	0		low	1	1	5.2
	sp|Q69Z98-4|BRSK2_MOUSE Isoform 4 of Serine/threonine-protein kinase BRSK2 OS=Mus musculus OX=10090 GN=Brsk2;sp|Q69Z98-2|BRSK2_MOUSE Isoform 2 of Serine/threonine-protein kinase BRSK2 OS=Mus musculus OX=10090 GN=Brsk2;sp|Q69Z98-3|BRSK2_MOUSE Isoform 3 of S	Q69Z98-4;Q69Z98-2;Q69Z98-3;Q69Z98	Serine/threonine-protein kinase BRSK2	Brsk2	0	832	989	0	173	0	0	0		518	1140	0	0	0	0	0	0	0		medium	3	3	5.8
	sp|Q921C3-2|BRWD1_MOUSE Isoform B of Bromodomain and WD repeat-containing protein 1 OS=Mus musculus OX=10090 GN=Brwd1;sp|Q921C3|BRWD1_MOUSE Bromodomain and WD repeat-containing protein 1 OS=Mus musculus OX=10090 GN=Brwd1 PE=1 SV=2	Q921C3-2;Q921C3	Bromodomain and WD repeat-containing protein 1	Brwd1	53	27	22	32	0	389	116	129		72	18	39	112	0	150	278	0	20		high	8	7	5.3
	sp|A2AHJ4|BRWD3_MOUSE Bromodomain and WD repeat-containing protein 3 OS=Mus musculus OX=10090 GN=Brwd3 PE=1 SV=1	A2AHJ4;A2AHJ4-2;A2AHJ4-3	Bromodomain and WD repeat-containing protein 3	Brwd3	0	0	0	0	0	0	0	27		0	83	48	0	0	0	0	0	0		medium	3	3	3.7
	sp|Q80Y55|BSDC1_MOUSE BSD domain-containing protein 1 OS=Mus musculus OX=10090 GN=Bsdc1 PE=1 SV=1	Q80Y55	BSD domain-containing protein 1	Bsdc1	0	0	101	535	0	0	462	0		64	46	85	187	97	163	133	0	0		medium	5	5	21.1
	sp|P18572-2|BASI_MOUSE Isoform 2 of Basigin OS=Mus musculus OX=10090 GN=Bsg;sp|P18572|BASI_MOUSE Basigin OS=Mus musculus OX=10090 GN=Bsg PE=1 SV=2	P18572-2;P18572	Basigin	Bsg	1576	881	1154	500864	478298	272014	298800	384768		1224	1171	2215	764764	870544	640025	373773	766195	490150		high	11	11	30.8
	sp|O88737-2|BSN_MOUSE Isoform 2 of Protein bassoon OS=Mus musculus OX=10090 GN=Bsn;sp|O88737|BSN_MOUSE Protein bassoon OS=Mus musculus OX=10090 GN=Bsn PE=1 SV=4	O88737-2;O88737	Protein bassoon	Bsn	297	95	100	0	0	35	0	0		674	891	756	0	1314	0	5435	0	0		medium	7	7	1.9
	sp|Q8R2Q8|BST2_MOUSE Bone marrow stromal antigen 2 OS=Mus musculus OX=10090 GN=Bst2 PE=1 SV=1	Q8R2Q8	Bone marrow stromal antigen 2	Bst2	600	963	558	88709	88938	53699	41662	74913		526	1319	640	102246	95324	92673	121162	79195	51569		medium	7	7	29.7
	tr|E9QAE3|E9QAE3_MOUSE B-TFIID TATA-box-binding protein-associated factor 1 OS=Mus musculus OX=10090 GN=Btaf1 PE=1 SV=1	E9QAE3		Btaf1	661	975	1069	35047	22628	26048	16519	20331		1336	1464	1202	29621	28945	39419	24095	23952	23563		high	59	59	42.7
	sp|P58544|BTBD1_MOUSE BTB/POZ domain-containing protein 1 OS=Mus musculus OX=10090 GN=Btbd1 PE=1 SV=3	P58544	BTB/POZ domain-containing protein 1	Btbd1	0	0	46	1660	1095	2098	1703	1081		0	0	0	764	1731	1731	1054	1477	1266		medium	5	4	20.5
	sp|Q80X66|BTBDA_MOUSE BTB/POZ domain-containing protein 10 OS=Mus musculus OX=10090 GN=Btbd10 PE=1 SV=1	Q80X66	BTB/POZ domain-containing protein 10	Btbd10	0	0	0	489	669	0	493	0		0	0	0	563	0	0	0	0	0		low	2	2	5.1
	sp|Q6GQW0|BTBDB_MOUSE Ankyrin repeat and BTB/POZ domain-containing protein BTBD11 OS=Mus musculus OX=10090 GN=Btbd11 PE=2 SV=2	Q6GQW0;Q6GQW0-2	Ankyrin repeat and BTB/POZ domain-containing protein BTBD11	Btbd11	0	86	52	0	0	0	0	0		201	149	348	206	253	440	682	672	45		medium	10	6	11.7
	sp|Q8C726|BTBD9_MOUSE BTB/POZ domain-containing protein 9 OS=Mus musculus OX=10090 GN=Btbd9 PE=1 SV=1	Q8C726	BTB/POZ domain-containing protein 9	Btbd9	0	0	222	686	0	0	590	0		0	0	0	1582	1768	0	619	0	0		medium	7	7	18.6
	sp|Q64152|BTF3_MOUSE Transcription factor BTF3 OS=Mus musculus OX=10090 GN=Btf3 PE=1 SV=3	Q64152	Transcription factor BTF3	Btf3	75898	47176	60742	2532766	2109729	2806387	1689041	2034089		155487	128357	128868	2844368	3982905	2792366	2940731	3863403	2995407		low	16	2	79.4
	sp|Q9CQH7|BT3L4_MOUSE Transcription factor BTF3 homolog 4 OS=Mus musculus OX=10090 GN=Btf3l4 PE=1 SV=1	Q9CQH7	Transcription factor BTF3 homolog 4	Btf3l4	13424	13732	29381	318397	257336	258868	287091	343013		16819	32328	44025	346867	446127	305710	316196	373738	327103		high	9	9	79.7
	sp|Q7TSA3|BTLA_MOUSE B- and T-lymphocyte attenuator OS=Mus musculus OX=10090 GN=Btla PE=1 SV=2;sp|Q7TSA3-3|BTLA_MOUSE Isoform 3 of B- and T-lymphocyte attenuator OS=Mus musculus OX=10090 GN=Btla;sp|Q7TSA3-2|BTLA_MOUSE Isoform 2 of B- and T-lymphocyte atten	Q7TSA3;Q7TSA3-3;Q7TSA3-2	B- and T-lymphocyte attenuator	Btla	2131	3153	2627	21310	11531	9635	4282	16244		1024	1280	997	8098	10944	5695	6111	0	1756		medium	6	6	23.5
	sp|O08901|BUB1_MOUSE Mitotic checkpoint serine/threonine-protein kinase BUB1 OS=Mus musculus OX=10090 GN=Bub1 PE=1 SV=1	O08901	Mitotic checkpoint serine/threonine-protein kinase BUB1	Bub1	0	0	0	2422	1579	1630	1070	650		0	0	0	3590	4280	3214	3295	3978	3763		high	23	23	31.3
	sp|Q9Z1S0|BUB1B_MOUSE Mitotic checkpoint serine/threonine-protein kinase BUB1 beta OS=Mus musculus OX=10090 GN=Bub1b PE=1 SV=2	Q9Z1S0	Mitotic checkpoint serine/threonine-protein kinase BUB1 beta	Bub1b	0	0	0	13084	10979	11468	7243	11250		0	0	0	22435	26134	35272	22686	34934	21446		high	43	43	53.6
	sp|Q9WVA3|BUB3_MOUSE Mitotic checkpoint protein BUB3 OS=Mus musculus OX=10090 GN=Bub3 PE=1 SV=2	Q9WVA3	Mitotic checkpoint protein BUB3	Bub3	25426	43509	41938	631973	515870	439885	384443	449731		29686	43846	40988	563458	521776	595945	549574	443608	424400		high	21	21	82.5
	sp|Q8R149|BUD13_MOUSE BUD13 homolog OS=Mus musculus OX=10090 GN=Bud13 PE=1 SV=1;sp|Q8R149-2|BUD13_MOUSE Isoform 2 of BUD13 homolog OS=Mus musculus OX=10090 GN=Bud13	Q8R149;Q8R149-2	BUD13 homolog	Bud13	1727	2429	2499	18704	12877	6323	5256	7999		2386	3912	3489	24684	25720	13105	14769	22257	22456		high	24	24	33.4
	sp|Q6PGH1|BUD31_MOUSE Protein BUD31 homolog OS=Mus musculus OX=10090 GN=Bud31 PE=1 SV=2	Q6PGH1;Q6PGH1-2	Protein BUD31 homolog	Bud31	43937	51285	27820	384510	287812	298631	312102	283295		41524	48031	57669	349479	278128	365328	329650	504046	289832		high	11	11	69.4
	sp|O54825|BYST_MOUSE Bystin OS=Mus musculus OX=10090 GN=Bysl PE=1 SV=3	O54825	Bystin	Bysl	5711	3947	5755	211007	170261	183801	124835	135494		7651	10310	13850	263334	314437	451365	196939	216162	202988		high	27	27	57.6
	sp|Q9CQC6|BZW1_MOUSE Basic leucine zipper and W2 domain-containing protein 1 OS=Mus musculus OX=10090 GN=Bzw1 PE=1 SV=1	Q9CQC6	Basic leucine zipper and W2 domain-containing protein 1	Bzw1	19379	19066	17902	470301	357919	341041	247063	368909		26534	23093	30407	382754	394363	378531	377006	415549	355184		high	24	24	50.8
	sp|Q91VK1|BZW2_MOUSE Basic leucine zipper and W2 domain-containing protein 2 OS=Mus musculus OX=10090 GN=Bzw2 PE=1 SV=1	Q91VK1	Basic leucine zipper and W2 domain-containing protein 2	Bzw2	48378	55378	52188	623067	363706	296947	230640	344499		33746	41369	50332	455029	397586	384295	399225	393112	275203		high	31	30	61.6
	sp|Q9JJ06|C1GLT_MOUSE Glycoprotein-N-acetylgalactosamine 3-beta-galactosyltransferase 1 OS=Mus musculus OX=10090 GN=C1galt1 PE=1 SV=1	Q9JJ06	Glycoprotein-N-acetylgalactosamine 3-beta-galactosyltransferase 1	C1galt1	162	679	678	1578	1831	726	1103	1573		931	551	1249	24561	1730	1247	2838	2265	1592		medium	5	5	19
	sp|Q9JMG2|C1GLC_MOUSE C1GALT1-specific chaperone 1 OS=Mus musculus OX=10090 GN=C1galt1c1 PE=2 SV=1	Q9JMG2	C1GALT1-specific chaperone 1	C1galt1c1	1567	1335	1133	3876	14237	10024	13942	1723		1109	1768	1717	3146	0	4858	5507	2104	8991		medium	6	6	21.5
	sp|O35658|C1QBP_MOUSE Complement component 1 Q subcomponent-binding protein, mitochondrial OS=Mus musculus OX=10090 GN=C1qbp PE=1 SV=1	O35658	Complement component 1 Q subcomponent-binding protein, mitochondrial	C1qbp	48123	48047	40463	1119115	922690	787564	690251	935267		99140	104763	101888	1068533	1050268	1259369	873260	1127951	695994		medium	7	7	34.5
	sp|Q80X80|C2C2L_MOUSE Phospholipid transfer protein C2CD2L OS=Mus musculus OX=10090 GN=C2cd2l PE=1 SV=3	Q80X80	C2 domain-containing protein 2-like	C2cd2l	0	134	119	342	0	192	356	0		101	383	0	555	124	66	1773	1739	0		medium	7	7	16
	sp|Q52KB6|C2CD3_MOUSE C2 domain-containing protein 3 OS=Mus musculus OX=10090 GN=C2cd3 PE=1 SV=3;sp|Q52KB6-3|C2CD3_MOUSE Isoform 3 of C2 domain-containing protein 3 OS=Mus musculus OX=10090 GN=C2cd3;sp|Q52KB6-2|C2CD3_MOUSE Isoform 2 of C2 domain-containing	Q52KB6;Q52KB6-3;Q52KB6-2	C2 domain-containing protein 3	C2cd3	12	49	43	98	872	95	91	0		76	60	72	46	113	511	0	0	256		high	8	8	5.3
	sp|Q7TPS5|C2CD5_MOUSE C2 domain-containing protein 5 OS=Mus musculus OX=10090 GN=C2cd5 PE=1 SV=2;sp|Q7TPS5-2|C2CD5_MOUSE Isoform 2 of C2 domain-containing protein 5 OS=Mus musculus OX=10090 GN=C2cd5;sp|Q7TPS5-3|C2CD5_MOUSE Isoform 3 of C2 domain-containing	Q7TPS5;Q7TPS5-2;Q7TPS5-3	C2 domain-containing protein 5	C2cd5	911	656	660	880	1235	1432	1370	1272		449	682	722	0	1111	1540	600	423	812		high	20	20	32.3
	sp|P00920|CAH2_MOUSE Carbonic anhydrase 2 OS=Mus musculus OX=10090 GN=Ca2 PE=1 SV=4	P00920	Carbonic anhydrase 2	Ca2	4908	4282	7479	2481	3743	1660	5138	4993		6918	9387	9933	7823	5520	8330	5009	13817	5472		high	11	11	58.8
	sp|Q8VDY9|CAAP1_MOUSE Caspase activity and apoptosis inhibitor 1 OS=Mus musculus OX=10090 GN=Caap1 PE=1 SV=2	Q8VDY9	Caspase activity and apoptosis inhibitor 1	Caap1	523	1279	1582	9750	11031	4895	11776	2928		620	1632	1700	9056	3582	3518	4127	7916	6892		high	11	11	50.3
	sp|Q06138|CAB39_MOUSE Calcium-binding protein 39 OS=Mus musculus OX=10090 GN=Cab39 PE=1 SV=2	Q06138	Calcium-binding protein 39	Cab39	15682	11644	13924	235888	202722	231639	146087	231589		10232	16742	18677	282409	253964	283028	240658	292086	219755		high	21	17	52.2
	sp|Q9DB16|CB39L_MOUSE Calcium-binding protein 39-like OS=Mus musculus OX=10090 GN=Cab39l PE=1 SV=3;sp|Q9DB16-2|CB39L_MOUSE Isoform 2 of Calcium-binding protein 39-like OS=Mus musculus OX=10090 GN=Cab39l	Q9DB16;Q9DB16-2	Calcium-binding protein 39-like	Cab39l	1036	510	604	11313	6300	5403	16122	4941		1821	999	654	10782	10446	6389	8420	11160	6160		high	11	11	40.7
	tr|G3X8Q1|G3X8Q1_MOUSE Calcineurin-binding protein 1 OS=Mus musculus OX=10090 GN=Cabin1 PE=1 SV=1	G3X8Q1;A0A1W2P819;A0A1W2P8C4		Cabin1	21	144	75	400	291	0	117	3535		13	104	186	902	0	183	608	582	637		high	25	25	16.2
	sp|Q8K3M5|CABL2_MOUSE CDK5 and ABL1 enzyme substrate 2 OS=Mus musculus OX=10090 GN=Cables2 PE=1 SV=2	Q8K3M5	CDK5 and ABL1 enzyme substrate 2	Cables2	0	0	0	0	988	820	627	641		182	0	197	0	0	0	550	0	0		medium	3	3	6.9
	sp|Q9CS00|CATIN_MOUSE Cactin OS=Mus musculus OX=10090 GN=Cactin PE=1 SV=2	Q9CS00	Cactin	Cactin	2666	2856	2689	10004	11390	13201	13394	7064		3101	2618	2907	12743	15461	26217	11890	11351	13818		high	26	26	35.8
	sp|Q8R0X2|CACL1_MOUSE CDK2-associated and cullin domain-containing protein 1 OS=Mus musculus OX=10090 GN=Cacul1 PE=2 SV=1;sp|Q8R0X2-2|CACL1_MOUSE Isoform 2 of CDK2-associated and cullin domain-containing protein 1 OS=Mus musculus OX=10090 GN=Cacul1	Q8R0X2;Q8R0X2-2	CDK2-associated and cullin domain-containing protein 1	Cacul1	0	0	0	757	1012	1829	2610	2961		0	0	92	2061	2710	5405	592	4492	2480		medium	6	6	26.8
	sp|Q9CXW3|CYBP_MOUSE Calcyclin-binding protein OS=Mus musculus OX=10090 GN=Cacybp PE=1 SV=1	Q9CXW3	Calcyclin-binding protein	Cacybp	57714	53371	74052	1928088	1355649	984413	1128195	923040		106934	102729	97224	1959260	1807471	1827553	1295233	1713026	1125259		high	20	20	68.1
	sp|B2RQC6|PYR1_MOUSE CAD protein OS=Mus musculus OX=10090 GN=Cad PE=1 SV=1;sp|B2RQC6-2|PYR1_MOUSE Isoform 2 of CAD protein OS=Mus musculus OX=10090 GN=Cad	B2RQC6;B2RQC6-2	CAD protein;Glutamine-dependent carbamoyl-phosphate synthase;Aspartate carbamoyltransferase;Dihydroorotase	Cad	5434	7180	6229	299394	208044	178208	158032	178655		12704	13486	13581	358935	327264	366462	334895	374208	261619		high	123	120	69.9
	sp|Q8CGU1|CACO1_MOUSE Calcium-binding and coiled-coil domain-containing protein 1 OS=Mus musculus OX=10090 GN=Calcoco1 PE=1 SV=2	Q8CGU1	Calcium-binding and coiled-coil domain-containing protein 1	Calcoco1	429	54	0	205	0	0	14230	500		0	0	0	0	0	0	0	0	0		medium	7	7	13.5
	sp|Q9R1W5|CALRL_MOUSE Calcitonin gene-related peptide type 1 receptor OS=Mus musculus OX=10090 GN=Calcrl PE=1 SV=2	Q9R1W5	Calcitonin gene-related peptide type 1 receptor	Calcrl	979	928	674	1251	969	914	915	1546		311	525	727	919	1087	1917	0	1117	845		medium	4	4	10.4
	sp|P14211|CALR_MOUSE Calreticulin OS=Mus musculus OX=10090 GN=Calr PE=1 SV=1	P14211	Calreticulin	Calr	344289	318195	444660	3058358	2171988	1592721	1691647	1607789		706016	731182	670820	2900466	3631237	2838074	1883891	2732997	1957205		high	36	36	83.7
	sp|O35887|CALU_MOUSE Calumenin OS=Mus musculus OX=10090 GN=Calu PE=1 SV=1	O35887	Calumenin	Calu	70771	77618	72340	274042	233668	214896	217582	200921		108847	125153	128132	344671	316024	303899	324162	290196	212219		high	23	23	70.2
	sp|Q8BW96|KCC1D_MOUSE Calcium/calmodulin-dependent protein kinase type 1D OS=Mus musculus OX=10090 GN=Camk1d PE=1 SV=2;sp|Q8BW96-2|KCC1D_MOUSE Isoform 2 of Calcium/calmodulin-dependent protein kinase type 1D OS=Mus musculus OX=10090 GN=Camk1d;sp|Q8BW96-3|K	Q8BW96;Q8BW96-2;Q8BW96-3;Q91YS8	Calcium/calmodulin-dependent protein kinase type 1D	Camk1d	1570	2040	2214	9602	7128	4500	3353	6841		3095	4323	4368	14710	7281	7981	4535	9848	6322		high	13	13	44.2
	sp|Q6PHZ2-2|KCC2D_MOUSE Isoform 2 of Calcium/calmodulin-dependent protein kinase type II subunit delta OS=Mus musculus OX=10090 GN=Camk2d;sp|Q6PHZ2-4|KCC2D_MOUSE Isoform 3 of Calcium/calmodulin-dependent protein kinase type II subunit delta OS=Mus musculus	Q6PHZ2-2;Q6PHZ2-4;Q6PHZ2;Q6PHZ2-5;P11798	Calcium/calmodulin-dependent protein kinase type II subunit delta	Camk2d	4750	6105	4913	17537	18813	17560	30072	28934		7010	9682	6772	33307	25551	28761	31750	41430	38045		high	14	13	51.5
	sp|Q923T9-3|KCC2G_MOUSE Isoform 3 of Calcium/calmodulin-dependent protein kinase type II subunit gamma OS=Mus musculus OX=10090 GN=Camk2g	Q923T9-3	Calcium/calmodulin-dependent protein kinase type II subunit gamma	Camk2g	7247	8873	10800	37298	36685	33013	25824	33233		12529	16042	14580	31988	24670	37824	20728	32969	29841		low	19	1	55.2
	sp|P08414|KCC4_MOUSE Calcium/calmodulin-dependent protein kinase type IV OS=Mus musculus OX=10090 GN=Camk4 PE=1 SV=2	P08414	Calcium/calmodulin-dependent protein kinase type IV	Camk4	3959	7286	5949	34282	43310	43385	24176	35945		1799	5576	4622	44703	51765	49328	35602	50913	43595		high	19	19	46.7
	sp|Q8C078-4|KKCC2_MOUSE Isoform 4 of Calcium/calmodulin-dependent protein kinase kinase 2 OS=Mus musculus OX=10090 GN=Camkk2;sp|Q8C078-2|KKCC2_MOUSE Isoform 2 of Calcium/calmodulin-dependent protein kinase kinase 2 OS=Mus musculus OX=10090 GN=Camkk2;sp|Q8C	Q8C078-4;Q8C078-2;Q8C078-3;Q8C078;Q8C078-5	Calcium/calmodulin-dependent protein kinase kinase 2	Camkk2	0	112	137	790	0	639	913	414		367	0	443	1074	1433	544	627	1483	1413		medium	7	7	19.1
	sp|A2AHC3|CAMP1_MOUSE Calmodulin-regulated spectrin-associated protein 1 OS=Mus musculus OX=10090 GN=Camsap1 PE=1 SV=1;sp|A2AHC3-2|CAMP1_MOUSE Isoform 2 of Calmodulin-regulated spectrin-associated protein 1 OS=Mus musculus OX=10090 GN=Camsap1	A2AHC3;A2AHC3-2	Calmodulin-regulated spectrin-associated protein 1	Camsap1	20	52	38	3425	2604	1314	689	1869		0	32	0	1706	2323	2810	3211	1720	1938		high	25	25	26.9
	sp|Q8C1B1|CAMP2_MOUSE Calmodulin-regulated spectrin-associated protein 2 OS=Mus musculus OX=10090 GN=Camsap2 PE=1 SV=3;sp|Q8C1B1-2|CAMP2_MOUSE Isoform 2 of Calmodulin-regulated spectrin-associated protein 2 OS=Mus musculus OX=10090 GN=Camsap2	Q8C1B1;Q8C1B1-2	Calmodulin-regulated spectrin-associated protein 2	Camsap2	0	492	0	1210	675	240	445	471		0	0	0	859	854	1395	808	1340	656		high	12	12	11.4
	sp|Q6ZQ38|CAND1_MOUSE Cullin-associated NEDD8-dissociated protein 1 OS=Mus musculus OX=10090 GN=Cand1 PE=1 SV=2	Q6ZQ38	Cullin-associated NEDD8-dissociated protein 1	Cand1	31140	43222	45255	334724	274854	264032	221415	253123		39375	46501	48693	279391	236259	295900	234420	259761	238781		high	69	68	58.8
	sp|Q6ZQ73|CAND2_MOUSE Cullin-associated NEDD8-dissociated protein 2 OS=Mus musculus OX=10090 GN=Cand2 PE=1 SV=2	Q6ZQ73	Cullin-associated NEDD8-dissociated protein 2	Cand2	68	172	144	1294	1053	765	1183	1414		0	31	62	183	301	400	550	230	201		high	16	16	17.1
	sp|Q8VCF1-3|CANT1_MOUSE Isoform 3 of Soluble calcium-activated nucleotidase 1 OS=Mus musculus OX=10090 GN=Cant1;sp|Q8VCF1|CANT1_MOUSE Soluble calcium-activated nucleotidase 1 OS=Mus musculus OX=10090 GN=Cant1 PE=2 SV=1	Q8VCF1-3;Q8VCF1;Q8VCF1-2	Soluble calcium-activated nucleotidase 1	Cant1	629	445	617	699	1641	1591	0	3401		706	915	376	1012	1690	2085	1177	0	2130		high	11	11	30.9
	sp|P35564|CALX_MOUSE Calnexin OS=Mus musculus OX=10090 GN=Canx PE=1 SV=1	P35564	Calnexin	Canx	58484	67545	72048	1003083	756935	687347	599361	659011		76872	112788	114573	1078788	1210338	1516951	769279	1027819	997038		high	38	38	51.6
	sp|P40124|CAP1_MOUSE Adenylyl cyclase-associated protein 1 OS=Mus musculus OX=10090 GN=Cap1 PE=1 SV=4	P40124	Adenylyl cyclase-associated protein 1	Cap1	431138	504092	599135	2151853	2198489	1233229	1684336	1521302		713729	879466	790854	1746273	1952458	1949915	1747939	2067295	1596844		high	41	40	85.9
	sp|Q9CYT6|CAP2_MOUSE Adenylyl cyclase-associated protein 2 OS=Mus musculus OX=10090 GN=Cap2 PE=1 SV=1	Q9CYT6	Adenylyl cyclase-associated protein 2	Cap2	92	188	0	0	0	0	0	0		0	0	0	0	740	801	0	0	883		medium	3	3	13.2
	sp|P24452|CAPG_MOUSE Macrophage-capping protein OS=Mus musculus OX=10090 GN=Capg PE=1 SV=2	P24452	Macrophage-capping protein	Capg	17430	28401	34172	239836	219412	120946	192727	258149		18825	16042	14347	47145	24334	39194	59118	73682	44255		high	15	15	45.7
	sp|O35350|CAN1_MOUSE Calpain-1 catalytic subunit OS=Mus musculus OX=10090 GN=Capn1 PE=1 SV=1	O35350	Calpain-1 catalytic subunit	Capn1	46606	48735	43588	126392	107536	86706	99592	127469		59655	74788	74791	141421	116876	68698	133237	142979	84767		high	55	55	68.9
	sp|Q9JLG8-2|CAN15_MOUSE Isoform 2 of Calpain-15 OS=Mus musculus OX=10090 GN=Capn15;sp|Q9JLG8|CAN15_MOUSE Calpain-15 OS=Mus musculus OX=10090 GN=Capn15 PE=1 SV=1	Q9JLG8-2;Q9JLG8	Calpain-15	Capn15	0	135	56	301	642	112	404	190		0	0	0	0	0	430	501	253	143		medium	6	6	9
	sp|O08529|CAN2_MOUSE Calpain-2 catalytic subunit OS=Mus musculus OX=10090 GN=Capn2 PE=1 SV=4	O08529	Calpain-2 catalytic subunit	Capn2	14264	16559	11255	50470	39196	27871	28886	36732		12931	10863	17099	24740	26243	25904	10339	23129	23740		high	36	36	64.7
	sp|Q9R1S8|CAN7_MOUSE Calpain-7 OS=Mus musculus OX=10090 GN=Capn7 PE=2 SV=1	Q9R1S8	Calpain-7	Capn7	661	985	1057	5256	3760	4526	4982	5030		370	580	769	4790	5042	6524	4877	3839	3948		high	22	22	33
	sp|O88456|CPNS1_MOUSE Calpain small subunit 1 OS=Mus musculus OX=10090 GN=Capns1 PE=1 SV=1	O88456;Q9D7J7	Calpain small subunit 1	Capns1	14286	15584	19372	65328	128446	94475	93316	133795		31541	31590	36241	106352	104111	124713	95918	116798	85729		high	12	12	60.2
	sp|Q60865|CAPR1_MOUSE Caprin-1 OS=Mus musculus OX=10090 GN=Caprin1 PE=1 SV=2	Q60865	Caprin-1	Caprin1	7964	8572	7553	702284	684346	310424	396142	440097		14419	13936	10981	703912	714643	652598	552816	911929	536184		high	26	26	43.8
	sp|P47753|CAZA1_MOUSE F-actin-capping protein subunit alpha-1 OS=Mus musculus OX=10090 GN=Capza1 PE=1 SV=4	P47753	F-actin-capping protein subunit alpha-1	Capza1	236417	284305	270746	1398772	1164143	1055200	1071544	946823		307175	407996	390148	1246927	1115740	1477657	989854	873828	1046338		high	13	13	72.4
	sp|P47754|CAZA2_MOUSE F-actin-capping protein subunit alpha-2 OS=Mus musculus OX=10090 GN=Capza2 PE=1 SV=3	P47754	F-actin-capping protein subunit alpha-2	Capza2	120023	132669	154233	1055580	749039	635858	778177	688139		210086	212092	217904	999015	963102	908234	1335341	940316	754459		high	15	13	74.1
	sp|P47757-2|CAPZB_MOUSE Isoform 2 of F-actin-capping protein subunit beta OS=Mus musculus OX=10090 GN=Capzb;sp|P47757-4|CAPZB_MOUSE Isoform 3 of F-actin-capping protein subunit beta OS=Mus musculus OX=10090 GN=Capzb;sp|P47757|CAPZB_MOUSE F-actin-capping pr	P47757-2;P47757-4;P47757	F-actin-capping protein subunit beta	Capzb	249690	246524	268765	1833278	1705554	1547508	1376797	1726769		404899	326238	349919	1720497	1543136	1774131	1550327	1904447	1548271		high	22	22	66.5
	sp|Q8CIS0-2|CAR11_MOUSE Isoform 2 of Caspase recruitment domain-containing protein 11 OS=Mus musculus OX=10090 GN=Card11;sp|Q8CIS0|CAR11_MOUSE Caspase recruitment domain-containing protein 11 OS=Mus musculus OX=10090 GN=Card11 PE=1 SV=2	Q8CIS0-2;Q8CIS0	Caspase recruitment domain-containing protein 11	Card11	3824	5177	4750	3705	3555	6019	2966	5820		4722	6814	4471	2547	2387	4074	1165	14977	3024		high	43	43	46.4
	tr|E9PWH2|E9PWH2_MOUSE Caspase recruitment domain family, member 6 OS=Mus musculus OX=10090 GN=Card6 PE=1 SV=1;tr|D3YYK3|D3YYK3_MOUSE Caspase recruitment domain family, member 6 (Fragment) OS=Mus musculus OX=10090 GN=Card6 PE=1 SV=1	E9PWH2;D3YYK3		Card6	58	147	146	0	0	0	0	0		170	204	321	0	0	7402	24863	0	112		high	11	11	11.7
	sp|Q9CR86|CHSP1_MOUSE Calcium-regulated heat stable protein 1 OS=Mus musculus OX=10090 GN=Carhsp1 PE=1 SV=1	Q9CR86	Calcium-regulated heat stable protein 1	Carhsp1	780	0	0	2790	7797	1848	2952	4242		529	0	0	11667	10094	5017	5899	6990	0		medium	3	3	42.6
	sp|Q9CZ42|NNRD_MOUSE ATP-dependent (S)-NAD(P)H-hydrate dehydratase OS=Mus musculus OX=10090 GN=Naxd PE=1 SV=1;sp|Q9CZ42-3|NNRD_MOUSE Isoform 3 of ATP-dependent (S)-NAD(P)H-hydrate dehydratase OS=Mus musculus OX=10090 GN=Naxd;sp|Q9CZ42-2|NNRD_MOUSE Isoform	Q9CZ42;Q9CZ42-3;Q9CZ42-2	ATP-dependent (S)-NAD(P)H-hydrate dehydratase	Carkd	3937	4366	4864	22926	3520	6365	15724	13732		4634	6082	6861	29579	27369	18657	20385	21368	7890		high	14	14	57.7
	sp|Q9WVG6-2|CARM1_MOUSE Isoform 2 of Histone-arginine methyltransferase CARM1 OS=Mus musculus OX=10090 GN=Carm1;sp|Q9WVG6|CARM1_MOUSE Histone-arginine methyltransferase CARM1 OS=Mus musculus OX=10090 GN=Carm1 PE=1 SV=2	Q9WVG6-2;Q9WVG6	Histone-arginine methyltransferase CARM1	Carm1	2423	3084	3030	96975	80136	86700	81195	82243		3412	2657	2984	119730	80035	126890	104307	134274	106978		high	24	24	58.3
	sp|Q9ER72|SYCC_MOUSE Cysteine--tRNA ligase, cytoplasmic OS=Mus musculus OX=10090 GN=Cars1 PE=1 SV=2;sp|Q9ER72-2|SYCC_MOUSE Isoform 2 of Cysteine--tRNA ligase, cytoplasmic OS=Mus musculus OX=10090 GN=Cars1	Q9ER72;Q9ER72-2	Cysteine--tRNA ligase, cytoplasmic	Cars	1624	1953	1452	126074	101298	101711	73437	72560		2771	2585	2107	148874	146997	148630	116624	128968	142226		high	42	42	53.2
	sp|Q8BYM8|SYCM_MOUSE Probable cysteine--tRNA ligase, mitochondrial OS=Mus musculus OX=10090 GN=Cars2 PE=1 SV=2	Q8BYM8	Probable cysteine--tRNA ligase, mitochondrial	Cars2	1533	807	1344	10379	11075	7198	6480	5275		161	630	846	4793	3087	6631	5044	6221	5069		high	14	14	32.8
	sp|Q8K3W3|CASC3_MOUSE Protein CASC3 OS=Mus musculus OX=10090 GN=Casc3 PE=1 SV=3	Q8K3W3	Protein CASC3	Casc3	1810	2280	1895	15644	7762	6885	14775	10532		3276	2648	3785	17639	16778	8907	12735	15867	8606		high	17	17	27.2
	sp|Q6P2L7|GOLM2_MOUSE Protein GOLM2 OS=Mus musculus OX=10090 GN=Golm2 PE=1 SV=1;sp|Q6P2L7-2|GOLM2_MOUSE Isoform 2 of Protein GOLM2 OS=Mus musculus OX=10090 GN=Golm2;sp|Q6P2L7-3|GOLM2_MOUSE Isoform 3 of Protein GOLM2 OS=Mus musculus OX=10090 GN=Golm2	Q6P2L7;Q6P2L7-2;Q6P2L7-3	Protein CASC4	Casc4	0	0	0	1100	0	591	668	0		0	0	0	6904	4837	2280	454	947	1504		high	9	9	28.7
	sp|Q66JQ7|KNL1_MOUSE Kinetochore scaffold 1 OS=Mus musculus OX=10090 GN=Knl1 PE=1 SV=3	Q66JQ7	Protein CASC5	Casc5	270	79	0	637	361	476	119	281		340	132	0	2342	2026	3145	1760	1694	576		high	23	23	19.5
	sp|Q7TN73|CASD1_MOUSE N-acetylneuraminate 9-O-acetyltransferase OS=Mus musculus OX=10090 GN=Casd1 PE=2 SV=1	Q7TN73	CAS1 domain-containing protein 1	Casd1	107	0	0	0	0	0	0	523		0	95	0	0	1947	291	0	0	0		medium	3	3	5
	sp|P29452|CASP1_MOUSE Caspase-1 OS=Mus musculus OX=10090 GN=Casp1 PE=1 SV=1	P29452	Caspase-1;Caspase-1 subunit p20;Caspase-1 subunit p10	Casp1	161	0	361	572	1045	712	953	1904		427	223	426	0	0	0	0	0	625		high	8	8	27.1
	sp|P29594|CASP2_MOUSE Caspase-2 OS=Mus musculus OX=10090 GN=Casp2 PE=1 SV=5	P29594	Caspase-2;Caspase-2 subunit p18;Caspase-2 subunit p13;Caspase-2 subunit p12	Casp2	215	1061	1089	12670	8489	6303	7064	10500		897	3002	2267	6579	6773	11904	8336	8273	5248		high	12	12	38.9
	sp|P70677|CASP3_MOUSE Caspase-3 OS=Mus musculus OX=10090 GN=Casp3 PE=1 SV=1	P70677	Caspase-3;Caspase-3 subunit p17;Caspase-3 subunit p12	Casp3	5833	3342	7281	360969	234616	227568	198838	265982		7256	10914	4563	465303	405666	400829	428078	521526	287065		high	19	19	80.1
	sp|O08738|CASP6_MOUSE Caspase-6 OS=Mus musculus OX=10090 GN=Casp6 PE=1 SV=1	O08738	Caspase-6;Caspase-6 subunit p18;Caspase-6 subunit p11	Casp6	17669	20490	15064	25853	25847	19903	20352	17396		9677	12224	14114	9122	18745	5636	7342	4631	4945		high	14	14	48.6
	sp|P97864|CASP7_MOUSE Caspase-7 OS=Mus musculus OX=10090 GN=Casp7 PE=1 SV=2	P97864	Caspase-7;Caspase-7 subunit p20;Caspase-7 subunit p11	Casp7	71	133	416	6583	767	2352	6352	952		214	641	352	1723	2239	0	3149	1323	1480		medium	7	7	36.6
	sp|O89110|CASP8_MOUSE Caspase-8 OS=Mus musculus OX=10090 GN=Casp8 PE=1 SV=1	O89110	Caspase-8;Caspase-8 subunit p18;Caspase-8 subunit p10	Casp8	20028	26175	27757	155005	119941	86620	98650	114560		21415	31310	28600	111650	124322	106760	100559	121935	70437		high	29	29	67.5
	sp|Q9WUF3|C8AP2_MOUSE CASP8-associated protein 2 OS=Mus musculus OX=10090 GN=Casp8ap2 PE=1 SV=2	Q9WUF3	CASP8-associated protein 2	Casp8ap2	0	0	0	7023	1992	1645	5060	815		19	56	177	3082	2840	4992	3374	2020	1719		high	26	26	21.9
	sp|Q8C3Q9|CASP9_MOUSE Caspase-9 OS=Mus musculus OX=10090 GN=Casp9 PE=1 SV=1	Q8C3Q9	Caspase-9;Caspase-9 subunit p35;Caspase-9 subunit p10	Casp9	0	0	134	0	0	0	0	0		0	226	91	799	0	1037	0	0	0		low	2	2	5.7
	sp|P51125-2|ICAL_MOUSE Isoform 2 of Calpastatin OS=Mus musculus OX=10090 GN=Cast;sp|P51125-6|ICAL_MOUSE Isoform 6 of Calpastatin OS=Mus musculus OX=10090 GN=Cast;sp|P51125|ICAL_MOUSE Calpastatin OS=Mus musculus OX=10090 GN=Cast PE=1 SV=2;sp|P51125-3|ICAL_M	P51125-2;P51125-6;P51125;P51125-3;P51125-7;P51125-5;P51125-4	Calpastatin	Cast	25190	30313	18933	133486	102670	103158	94640	154729		20387	29352	20243	86304	91062	80077	82299	103584	72980		high	40	40	55.8
	sp|P24270|CATA_MOUSE Catalase OS=Mus musculus OX=10090 GN=Cat PE=1 SV=4	P24270	Catalase	Cat	12610	17712	20930	121744	69377	55823	81940	95361		14899	21517	23267	96361	72032	112035	87284	71982	70081		high	32	32	68.9
	sp|Q08024|PEBB_MOUSE Core-binding factor subunit beta OS=Mus musculus OX=10090 GN=Cbfb PE=1 SV=1;sp|Q08024-4|PEBB_MOUSE Isoform 4 of Core-binding factor subunit beta OS=Mus musculus OX=10090 GN=Cbfb;sp|Q08024-3|PEBB_MOUSE Isoform 3 of Core-binding factor s	Q08024;Q08024-4;Q08024-3	Core-binding factor subunit beta	Cbfb	57428	41759	50433	303537	210267	222698	249825	213149		81626	98753	106906	364336	416310	426310	261772	277689	318758		low	16	2	67.4
	sp|Q08024-2|PEBB_MOUSE Isoform 2 of Core-binding factor subunit beta OS=Mus musculus OX=10090 GN=Cbfb	Q08024-2	Core-binding factor subunit beta	Cbfb	4759	4065	6901	22478	679	7533	3168	8370		3275	3240	4464	30028	0	321	32646	26270	0		low	2	2	65.4
	sp|P22682|CBL_MOUSE E3 ubiquitin-protein ligase CBL OS=Mus musculus OX=10090 GN=Cbl PE=1 SV=3	P22682;Q80XL1	E3 ubiquitin-protein ligase CBL	Cbl	3877	8547	8508	67748	54741	41344	39639	51655		6584	7411	8487	50238	29579	47577	29037	52636	43548		high	38	38	66.8
	sp|Q3TTA7|CBLB_MOUSE E3 ubiquitin-protein ligase CBL-B OS=Mus musculus OX=10090 GN=Cblb PE=1 SV=3;sp|Q3TTA7-2|CBLB_MOUSE Isoform 2 of E3 ubiquitin-protein ligase CBL-B OS=Mus musculus OX=10090 GN=Cblb	Q3TTA7;Q3TTA7-2	E3 ubiquitin-protein ligase CBL-B	Cblb	1071	1426	1533	163670	122466	97913	89316	132799		1175	900	668	95083	110619	104822	90852	118523	84151		high	51	47	59.7
	sp|Q9JIY2|HAKAI_MOUSE E3 ubiquitin-protein ligase Hakai OS=Mus musculus OX=10090 GN=Cbll1 PE=1 SV=1;sp|Q9JIY2-3|HAKAI_MOUSE Isoform 3 of E3 ubiquitin-protein ligase Hakai OS=Mus musculus OX=10090 GN=Cbll1;sp|Q9JIY2-2|HAKAI_MOUSE Isoform 2 of E3 ubiquitin-p	Q9JIY2;Q9JIY2-3;Q9JIY2-2;Q9JIY2-4	E3 ubiquitin-protein ligase Hakai	Cbll1	1107	1562	2239	12289	7467	5200	11430	5970		1066	2930	2415	12851	13338	8437	6406	9086	6763		high	14	14	35.4
	sp|P48758|CBR1_MOUSE Carbonyl reductase [NADPH] 1 OS=Mus musculus OX=10090 GN=Cbr1 PE=1 SV=3	P48758	Carbonyl reductase [NADPH] 1	Cbr1	72403	107863	158401	581880	374280	336220	482579	484006		115965	140673	124215	437208	420983	350697	311483	382158	270411		high	21	20	79.4
	sp|Q91VT4|CBR4_MOUSE Carbonyl reductase family member 4 OS=Mus musculus OX=10090 GN=Cbr4 PE=1 SV=2	Q91VT4	Carbonyl reductase family member 4	Cbr4	6407	6246	10179	12675	15353	11246	11963	18349		4402	7125	8736	9138	7706	11724	14382	20936	6721		high	10	10	55.1
	sp|Q8VEH6|CBWD1_MOUSE COBW domain-containing protein 1 OS=Mus musculus OX=10090 GN=Cbwd1 PE=1 SV=1	Q8VEH6;Q8VEH6-2	COBW domain-containing protein 1	Cbwd1	0	232	0	25313	23517	26881	60843	14216		375	234	112	133770	62352	52792	35279	138228	48355		high	15	15	53.7
	sp|P83917|CBX1_MOUSE Chromobox protein homolog 1 OS=Mus musculus OX=10090 GN=Cbx1 PE=1 SV=1	P83917	Chromobox protein homolog 1	Cbx1	123272	134733	141365	433820	363210	353742	205678	413729		107402	167905	172042	410817	474497	373219	393163	362433	317051		high	12	12	63.8
	sp|P30658|CBX2_MOUSE Chromobox protein homolog 2 OS=Mus musculus OX=10090 GN=Cbx2 PE=1 SV=2	P30658	Chromobox protein homolog 2	Cbx2	144	0	0	1149	1279	1488	1347	1922		0	0	0	2963	2133	2475	5453	3249	1223		medium	7	7	22
	sp|P23198|CBX3_MOUSE Chromobox protein homolog 3 OS=Mus musculus OX=10090 GN=Cbx3 PE=1 SV=2	P23198	Chromobox protein homolog 3	Cbx3	558779	754559	865744	3698400	3535969	3090080	3187145	3660072		663829	769927	1229920	2871575	3062592	3219985	2408600	2847941	3006640		high	14	12	63.9
	sp|O55187|CBX4_MOUSE E3 SUMO-protein ligase CBX4 OS=Mus musculus OX=10090 GN=Cbx4 PE=1 SV=2;sp|O55187-2|CBX4_MOUSE Isoform 2 of E3 SUMO-protein ligase CBX4 OS=Mus musculus OX=10090 GN=Cbx4	O55187;O55187-2	E3 SUMO-protein ligase CBX4	Cbx4	2317	3040	2270	11002	7087	7753	10671	5422		1977	2256	3110	8574	8736	5330	4368	5932	5550		high	19	19	38.1
	sp|Q61686|CBX5_MOUSE Chromobox protein homolog 5 OS=Mus musculus OX=10090 GN=Cbx5 PE=1 SV=1	Q61686	Chromobox protein homolog 5	Cbx5	33894	32097	42590	391373	260605	217328	297200	339046		26493	35860	33783	499540	507991	386463	314202	426195	260187		high	9	9	56.5
	sp|Q9DBY5|CBX6_MOUSE Chromobox protein homolog 6 OS=Mus musculus OX=10090 GN=Cbx6 PE=1 SV=2	Q9DBY5	Chromobox protein homolog 6	Cbx6	195	399	268	1356	1848	646	2453	1574		134	249	220	826	1072	1451	2202	1777	645		medium	6	6	21.5
	sp|Q8VDS3|CBX7_MOUSE Chromobox protein homolog 7 OS=Mus musculus OX=10090 GN=Cbx7 PE=1 SV=1	Q8VDS3	Chromobox protein homolog 7	Cbx7	265	0	956	0	0	1916	6663	0		365	0	642	0	0	0	1977	0	0		medium	4	4	31.6
	sp|Q9QXV1|CBX8_MOUSE Chromobox protein homolog 8 OS=Mus musculus OX=10090 GN=Cbx8 PE=1 SV=1	Q9QXV1	Chromobox protein homolog 8	Cbx8	1198	1510	1576	5266	4808	4575	3986	2164		2321	2632	2416	11747	5935	7097	2961	5605	3547		high	14	13	50.6
	sp|Q8K1A6|C2D1A_MOUSE Coiled-coil and C2 domain-containing protein 1A OS=Mus musculus OX=10090 GN=Cc2d1a PE=1 SV=2	Q8K1A6	Coiled-coil and C2 domain-containing protein 1A	Cc2d1a	812	981	641	5817	6379	6225	3992	7316		1000	683	1222	6517	7250	9911	6316	7934	7326		high	31	31	44.3
	sp|Q8BRN9|C2D1B_MOUSE Coiled-coil and C2 domain-containing protein 1B OS=Mus musculus OX=10090 GN=Cc2d1b PE=1 SV=1	Q8BRN9	Coiled-coil and C2 domain-containing protein 1B	Cc2d1b	10020	13293	12662	37951	34192	24970	35175	32172		11683	16164	15364	42679	36748	48568	32455	46630	23387		high	30	30	50
	sp|Q8CH18|CCAR1_MOUSE Cell division cycle and apoptosis regulator protein 1 OS=Mus musculus OX=10090 GN=Ccar1 PE=1 SV=1;sp|Q8CH18-3|CCAR1_MOUSE Isoform 3 of Cell division cycle and apoptosis regulator protein 1 OS=Mus musculus OX=10090 GN=Ccar1	Q8CH18;Q8CH18-3;Q8CH18-2	Cell division cycle and apoptosis regulator protein 1	Ccar1	13019	17105	16534	74225	57613	32154	32093	45223		12535	21815	19328	46181	50351	61742	37864	50420	44234		high	46	46	40.9
	sp|Q8VDP4|CCAR2_MOUSE Cell cycle and apoptosis regulator protein 2 OS=Mus musculus OX=10090 GN=Ccar2 PE=1 SV=2	Q8VDP4	Cell cycle and apoptosis regulator protein 2	Ccar2	13009	29617	26676	103310	76658	64902	71238	76988		20185	35842	36461	76513	81905	93548	57799	81009	63464		high	46	46	58.1
	sp|Q8BTY1|KAT1_MOUSE Kynurenine--oxoglutarate transaminase 1 OS=Mus musculus OX=10090 GN=Kyat1 PE=1 SV=1	Q8BTY1	Kynurenine--oxoglutarate transaminase 1	Ccbl1	996	1389	2134	3456	2385	2185	4925	4131		1733	1993	1981	5593	4227	3851	3754	2676	2445		high	10	10	37.3
	sp|Q71RI9-2|KAT3_MOUSE Isoform 2 of Kynurenine--oxoglutarate transaminase 3 OS=Mus musculus OX=10090 GN=Kyat3;sp|Q71RI9|KAT3_MOUSE Kynurenine--oxoglutarate transaminase 3 OS=Mus musculus OX=10090 GN=Kyat3 PE=1 SV=1	Q71RI9-2;Q71RI9	Kynurenine--oxoglutarate transaminase 3	Ccbl2	253	462	545	14794	12496	12236	13814	9520		293	560	762	20606	17290	24036	13032	10038	11007		high	11	11	34.8
	sp|Q9DA08|SGF29_MOUSE SAGA-associated factor 29 OS=Mus musculus OX=10090 GN=Sgf29 PE=2 SV=1	Q9DA08	SAGA-associated factor 29 homolog	Ccdc101	782	375	501	15769	18394	14866	14507	12824		1912	1536	1637	29816	30736	46790	20131	27124	16265		high	12	12	60.8
	sp|Q3TMW1|C102A_MOUSE Coiled-coil domain-containing protein 102A OS=Mus musculus OX=10090 GN=Ccdc102a PE=1 SV=2	Q3TMW1	Coiled-coil domain-containing protein 102A	Ccdc102a	0	0	0	0	0	71261	0	0		131	945	367	0	0	1037	107	582	0		medium	7	7	16.2
	sp|Q810S1|MCUB_MOUSE Calcium uniporter regulatory subunit MCUb, mitochondrial OS=Mus musculus OX=10090 GN=Mcub PE=1 SV=1	Q810S1	Calcium uniporter regulatory subunit MCUb, mitochondrial	Ccdc109b	764	368	314	3876	1698	0	4212	564		0	0	0	0	0	0	600	0	0		high	9	9	38.6
	sp|Q8VE99|CC115_MOUSE Coiled-coil domain-containing protein 115 OS=Mus musculus OX=10090 GN=Ccdc115 PE=1 SV=1	Q8VE99	Coiled-coil domain-containing protein 115	Ccdc115	202	0	602	17275	6057	0	7253	1582		1144	1802	1381	37935	14759	18305	10115	16116	1657		high	9	9	55.6
	sp|Q6PB51|CC117_MOUSE Coiled-coil domain-containing protein 117 OS=Mus musculus OX=10090 GN=Ccdc117 PE=1 SV=1	Q6PB51	Coiled-coil domain-containing protein 117	Ccdc117	0	0	0	5597	1532	918	0	1554		0	0	0	10901	8169	4629	6055	4267	948		medium	5	5	25.3
	sp|Q8R344|CCD12_MOUSE Coiled-coil domain-containing protein 12 OS=Mus musculus OX=10090 GN=Ccdc12 PE=1 SV=2	Q8R344	Coiled-coil domain-containing protein 12	Ccdc12	37325	49139	32426	136707	191727	215447	202975	181876		37894	51561	56487	255056	279596	220543	211972	249046	267871		high	10	10	62
	sp|Q9D8X2|CC124_MOUSE Coiled-coil domain-containing protein 124 OS=Mus musculus OX=10090 GN=Ccdc124 PE=1 SV=1	Q9D8X2	Coiled-coil domain-containing protein 124	Ccdc124	16458	18251	16498	191484	106721	107701	117644	134115		23291	28743	23770	113235	122847	266193	120450	113068	137806		high	15	15	47.5
	sp|Q3TC33|CC127_MOUSE Coiled-coil domain-containing protein 127 OS=Mus musculus OX=10090 GN=Ccdc127 PE=1 SV=2;sp|Q3TC33-2|CC127_MOUSE Isoform 2 of Coiled-coil domain-containing protein 127 OS=Mus musculus OX=10090 GN=Ccdc127	Q3TC33;Q3TC33-2	Coiled-coil domain-containing protein 127	Ccdc127	232	0	0	789	913	2165	5577	1494		115	122	137	2923	3399	3399	1904	7706	2963		high	8	8	32.3
	sp|Q9D516|CC130_MOUSE Coiled-coil domain-containing protein 130 OS=Mus musculus OX=10090 GN=Ccdc130 PE=2 SV=1	Q9D516;Q9D516-2	Coiled-coil domain-containing protein 130	Ccdc130	110	222	148	1179	649	0	0	0		206	912	944	1020	0	897	1380	0	522		medium	5	5	16.4
	sp|Q8CI71|VPS50_MOUSE Syndetin OS=Mus musculus OX=10090 GN=Vps50 PE=1 SV=2;sp|Q8CI71-2|VPS50_MOUSE Isoform 2 of Syndetin OS=Mus musculus OX=10090 GN=Vps50;sp|Q8CI71-3|VPS50_MOUSE Isoform 3 of Syndetin OS=Mus musculus OX=10090 GN=Vps50	Q8CI71;Q8CI71-2;Q8CI71-3	Coiled-coil domain-containing protein 132	Ccdc132	747	579	764	7183	4552	5459	3062	4714		533	723	1344	6364	5935	4585	2799	8379	3280		high	24	24	32.4
	sp|Q8C7V8|CC134_MOUSE Coiled-coil domain-containing protein 134 OS=Mus musculus OX=10090 GN=Ccdc134 PE=1 SV=1;sp|Q8C7V8-2|CC134_MOUSE Isoform 2 of Coiled-coil domain-containing protein 134 OS=Mus musculus OX=10090 GN=Ccdc134	Q8C7V8;Q8C7V8-2	Coiled-coil domain-containing protein 134	Ccdc134	2902	1966	1626	31016	16085	17120	28229	17619		3399	3208	2681	39008	28564	16697	49419	32932	18130		high	9	9	42.8
	sp|Q8R0K4|CC137_MOUSE Coiled-coil domain-containing protein 137 OS=Mus musculus OX=10090 GN=Ccdc137 PE=2 SV=1	Q8R0K4	Coiled-coil domain-containing protein 137	Ccdc137	4143	5220	4529	50845	49473	42747	29889	29408		2755	4334	6214	75471	58384	167250	41038	57076	50052		high	15	15	49.7
	sp|Q8K2J4|CCD14_MOUSE Coiled-coil domain-containing protein 14 OS=Mus musculus OX=10090 GN=Ccdc14 PE=2 SV=3	Q8K2J4	Coiled-coil domain-containing protein 14	Ccdc14	0	0	0	0	277	0	0	0		0	0	0	0	203	196	365	246	99		medium	4	4	7.4
	tr|E9Q9F7|E9Q9F7_MOUSE Coiled-coil domain-containing 146 OS=Mus musculus OX=10090 GN=Ccdc146 PE=1 SV=1	E9Q9F7		Ccdc146	0	0	0	8827	3968	2784	1076	1533		0	0	0	3330	1433	1054	880	3390	1150		low	2	2	1.9
	sp|Q8C9M2-2|CCD15_MOUSE Isoform 2 of Coiled-coil domain-containing protein 15 OS=Mus musculus OX=10090 GN=Ccdc15;sp|Q8C9M2|CCD15_MOUSE Coiled-coil domain-containing protein 15 OS=Mus musculus OX=10090 GN=Ccdc15 PE=2 SV=2	Q8C9M2-2;Q8C9M2;Q8C9M2-3;Q8C9M2-4	Coiled-coil domain-containing protein 15	Ccdc15	106	141	278	302	423	0	821	165		184	596	347	959	996	686	308	2126	443		high	14	14	24.7
	sp|Q9D162-2|CC167_MOUSE Isoform 2 of Coiled-coil domain-containing protein 167 OS=Mus musculus OX=10090 GN=Ccdc167;sp|Q9D162|CC167_MOUSE Coiled-coil domain-containing protein 167 OS=Mus musculus OX=10090 GN=Ccdc167 PE=1 SV=2;sp|Q9D162-3|CC167_MOUSE Isoform	Q9D162-2;Q9D162;Q9D162-3	Coiled-coil domain-containing protein 167	Ccdc167	0	0	0	13245	5592	14987	0	10508		2821	418	2733	1861	7159	111379	11625	11672	18178		medium	4	4	35.6
	sp|Q3U155|CC174_MOUSE Coiled-coil domain-containing protein 174 OS=Mus musculus OX=10090 GN=Ccdc174 PE=2 SV=1	Q3U155	Coiled-coil domain-containing protein 174	Ccdc174	1509	1311	1353	4562	3544	3961	3736	2569		1421	2273	1931	7077	3385	9000	3328	5902	5161		high	17	17	44.5
	sp|Q9JIG7|CCD22_MOUSE Coiled-coil domain-containing protein 22 OS=Mus musculus OX=10090 GN=Ccdc22 PE=1 SV=1	Q9JIG7	Coiled-coil domain-containing protein 22	Ccdc22	945	2344	3214	24823	18297	12913	14787	13128		2268	3711	3142	21111	25923	30412	13889	20814	19272		high	32	32	61.1
	sp|Q78PG9|CCD25_MOUSE Coiled-coil domain-containing protein 25 OS=Mus musculus OX=10090 GN=Ccdc25 PE=1 SV=1	Q78PG9	Coiled-coil domain-containing protein 25	Ccdc25	7124	3494	6288	100916	90098	97215	76518	67236		4278	5697	6375	114555	66697	109846	176592	79112	57267		high	11	11	55.8
	sp|Q9CR29|CCD43_MOUSE Coiled-coil domain-containing protein 43 OS=Mus musculus OX=10090 GN=Ccdc43 PE=1 SV=1;sp|Q9CR29-2|CCD43_MOUSE Isoform 2 of Coiled-coil domain-containing protein 43 OS=Mus musculus OX=10090 GN=Ccdc43	Q9CR29;Q9CR29-2	Coiled-coil domain-containing protein 43	Ccdc43	6117	8621	5655	20937	20013	17300	13540	20122		4987	7041	11416	38778	39867	54168	30940	34218	20742		high	12	12	47.7
	sp|Q9D024|CCD47_MOUSE Coiled-coil domain-containing protein 47 OS=Mus musculus OX=10090 GN=Ccdc47 PE=1 SV=2;sp|Q9D024-2|CCD47_MOUSE Isoform 2 of Coiled-coil domain-containing protein 47 OS=Mus musculus OX=10090 GN=Ccdc47;sp|Q9D024-3|CCD47_MOUSE Isoform 3 o	Q9D024;Q9D024-2;Q9D024-3	Coiled-coil domain-containing protein 47	Ccdc47	9847	12506	12284	117343	139199	107116	91304	79335		11630	15791	14265	125978	92283	120855	111512	118819	92003		high	27	27	49.3
	sp|Q810U5-3|CCD50_MOUSE Isoform 3 of Coiled-coil domain-containing protein 50 OS=Mus musculus OX=10090 GN=Ccdc50;sp|Q810U5|CCD50_MOUSE Coiled-coil domain-containing protein 50 OS=Mus musculus OX=10090 GN=Ccdc50 PE=1 SV=1;sp|Q810U5-2|CCD50_MOUSE Isoform 2 o	Q810U5-3;Q810U5;Q810U5-2	Coiled-coil domain-containing protein 50	Ccdc50	0	0	0	100310	103212	41367	62606	64277		0	0	0	106219	144991	123230	96920	100346	97847		high	15	15	58
	sp|Q3URS9-2|MITOK_MOUSE Isoform 2 of Mitochondrial potassium channel OS=Mus musculus OX=10090 GN=Ccdc51;sp|Q3URS9|MITOK_MOUSE Mitochondrial potassium channel OS=Mus musculus OX=10090 GN=Ccdc51 PE=1 SV=1	Q3URS9-2;Q3URS9	Coiled-coil domain-containing protein 51	Ccdc51	2308	1174	1568	10080	10947	13056	7588	10628		3359	2218	2028	21696	27379	22664	12099	20558	12830		high	16	16	41.9
	sp|Q9CR27|WASC3_MOUSE WASH complex subunit 3 OS=Mus musculus OX=10090 GN=Washc3 PE=1 SV=1	Q9CR27	WASH complex subunit CCDC53	Ccdc53	1696	2181	4230	8182	7968	10839	14824	10077		2996	1607	5151	8637	9870	10041	6727	18140	23461		high	8	8	47.4
	sp|Q8R3Q6|CCD58_MOUSE Coiled-coil domain-containing protein 58 OS=Mus musculus OX=10090 GN=Ccdc58 PE=1 SV=1	Q8R3Q6	Coiled-coil domain-containing protein 58	Ccdc58	0	354	0	48427	31446	18732	26847	18222		241	487	0	56713	34591	12271	21591	27653	12678		medium	6	6	48.6
	sp|Q8R2N0|TAP26_MOUSE Thyroid transcription factor 1-associated protein 26 OS=Mus musculus OX=10090 GN=Ccdc59 PE=2 SV=2;sp|Q8R2N0-2|TAP26_MOUSE Isoform 2 of Thyroid transcription factor 1-associated protein 26 OS=Mus musculus OX=10090 GN=Ccdc59	Q8R2N0;Q8R2N0-2	Thyroid transcription factor 1-associated protein 26	Ccdc59	3056	3135	2954	6800	21415	10458	5442	13727		5686	6256	4033	18257	11502	20652	6521	13392	12942		medium	5	5	25.4
	sp|D3YZP9|CCDC6_MOUSE Coiled-coil domain-containing protein 6 OS=Mus musculus OX=10090 GN=Ccdc6 PE=1 SV=1	D3YZP9	Coiled-coil domain-containing protein 6	Ccdc6	1017	1586	1639	18591	8871	5594	5453	7935		1473	3006	1612	11970	13048	9734	10199	21566	7099		high	16	16	40.1
	sp|Q3UJV1|CCD61_MOUSE Coiled-coil domain-containing protein 61 OS=Mus musculus OX=10090 GN=Ccdc61 PE=1 SV=1	Q3UJV1	Coiled-coil domain-containing protein 61	Ccdc61	70	72	0	1402	763	586	0	903		0	113	0	0	470	0	315	0	0		low	2	2	4.7
	sp|A0JNT9|BICL1_MOUSE BICD family-like cargo adapter 1 OS=Mus musculus OX=10090 GN=Bicdl1 PE=1 SV=1	A0JNT9;A0JNT9-3	Bicaudal D-related protein 1	Ccdc64	0	0	0	177	452	551	114	232		0	0	0	1079	273	0	119	247	0		medium	4	4	14.4
	sp|Q3TCJ8|CCD69_MOUSE Coiled-coil domain-containing protein 69 OS=Mus musculus OX=10090 GN=Ccdc69 PE=1 SV=1;sp|Q3TCJ8-2|CCD69_MOUSE Isoform 2 of Coiled-coil domain-containing protein 69 OS=Mus musculus OX=10090 GN=Ccdc69	Q3TCJ8;Q3TCJ8-2	Coiled-coil domain-containing protein 69	Ccdc69	949	409	643	16567	7835	3073	7497	8160		2018	302	705	13237	12000	3107	19394	9456	4453		high	8	8	47.5
	sp|Q8VEG0|CCD71_MOUSE Coiled-coil domain-containing protein 71 OS=Mus musculus OX=10090 GN=Ccdc71 PE=2 SV=1	Q8VEG0	Coiled-coil domain-containing protein 71	Ccdc71	598	528	729	1092	1356	0	0	0		491	1126	861	1037	0	0	0	0	1029		medium	3	3	7.4
	tr|E9Q4T4|E9Q4T4_MOUSE Coiled-coil domain-containing 71-like OS=Mus musculus OX=10090 GN=Ccdc71l PE=1 SV=1	E9Q4T4		Ccdc71l	304	512	528	0	0	774	0	2821		349	754	990	0	0	1613	0	1574	1072		medium	5	5	31.7
	sp|Q9CZH8-2|CCD77_MOUSE Isoform 2 of Coiled-coil domain-containing protein 77 OS=Mus musculus OX=10090 GN=Ccdc77;sp|Q9CZH8|CCD77_MOUSE Coiled-coil domain-containing protein 77 OS=Mus musculus OX=10090 GN=Ccdc77 PE=1 SV=1	Q9CZH8-2;Q9CZH8	Coiled-coil domain-containing protein 77	Ccdc77	0	0	0	0	0	0	0	0		151	0	0	650	748	0	0	0	0		medium	4	4	13
	sp|Q6PG04|CCD82_MOUSE Coiled-coil domain-containing protein 82 OS=Mus musculus OX=10090 GN=Ccdc82 PE=2 SV=1	Q6PG04	Coiled-coil domain-containing protein 82	Ccdc82	319	535	0	268	805	251	363	735		106	300	454	1298	1374	1290	1602	610	268		high	10	10	25.9
	sp|E9Q6B2|CC85C_MOUSE Coiled-coil domain-containing protein 85C OS=Mus musculus OX=10090 GN=Ccdc85c PE=1 SV=1	E9Q6B2	Coiled-coil domain-containing protein 85C	Ccdc85c	0	67	0	0	0	0	0	319		0	0	0	1279	1894	1068	967	2212	0		medium	4	4	16.7
	sp|Q9JJ89|CCD86_MOUSE Coiled-coil domain-containing protein 86 OS=Mus musculus OX=10090 GN=Ccdc86 PE=1 SV=2	Q9JJ89	Coiled-coil domain-containing protein 86	Ccdc86	5036	7439	7346	114017	123080	75797	48997	69119		10657	15438	15176	102642	105865	132608	83840	87552	86002		high	17	17	47.9
	sp|Q4QRL3|CC88B_MOUSE Coiled-coil domain-containing protein 88B OS=Mus musculus OX=10090 GN=Ccdc88b PE=1 SV=2;sp|Q4QRL3-2|CC88B_MOUSE Isoform 2 of Coiled-coil domain-containing protein 88B OS=Mus musculus OX=10090 GN=Ccdc88b	Q4QRL3;Q4QRL3-2	Coiled-coil domain-containing protein 88B	Ccdc88b	2915	6043	5757	21311	15811	11323	9015	17495		4621	6393	6252	20682	25133	33986	15151	26267	12816		high	71	71	54
	sp|Q6VGS5|DAPLE_MOUSE Protein Daple OS=Mus musculus OX=10090 GN=Ccdc88c PE=1 SV=1;sp|Q6VGS5-2|DAPLE_MOUSE Isoform 2 of Protein Daple OS=Mus musculus OX=10090 GN=Ccdc88c	Q6VGS5;Q6VGS5-2	Protein Daple	Ccdc88c	893	1150	860	2179	1993	1790	751	1070		608	1412	1106	2927	3246	2723	1968	2141	1973		high	41	41	26.2
	sp|Q8VC31|CCDC9_MOUSE Coiled-coil domain-containing protein 9 OS=Mus musculus OX=10090 GN=Ccdc9 PE=1 SV=1	Q8VC31	Coiled-coil domain-containing protein 9	Ccdc9	5532	5333	4870	21046	26546	22655	11341	31804		5244	5873	5875	27068	25262	31629	15459	27517	23503		high	19	19	28.5
	sp|Q8C3X2|CC90B_MOUSE Coiled-coil domain-containing protein 90B, mitochondrial OS=Mus musculus OX=10090 GN=Ccdc90b PE=1 SV=1;sp|Q8C3X2-2|CC90B_MOUSE Isoform 2 of Coiled-coil domain-containing protein 90B, mitochondrial OS=Mus musculus OX=10090 GN=Ccdc90b	Q8C3X2;Q8C3X2-2	Coiled-coil domain-containing protein 90B, mitochondrial	Ccdc90b	0	0	0	5874	2057	2200	536	3212		0	0	0	4803	4156	3919	7799	1956	419		medium	4	4	25
	sp|Q9D8L5|CCD91_MOUSE Coiled-coil domain-containing protein 91 OS=Mus musculus OX=10090 GN=Ccdc91 PE=1 SV=2	Q9D8L5	Coiled-coil domain-containing protein 91	Ccdc91	46	0	40	1400	648	472	1078	1361		0	125	99	2973	1756	1237	1227	1781	706		medium	5	5	13.1
	sp|Q8VDN4|CCD92_MOUSE Coiled-coil domain-containing protein 92 OS=Mus musculus OX=10090 GN=Ccdc92 PE=1 SV=1	Q8VDN4	Coiled-coil domain-containing protein 92	Ccdc92	0	206	0	94	138	0	0	0		0	0	575	159	108	0	0	0	0		medium	4	4	18.2
	sp|Q7TQK5|CCD93_MOUSE Coiled-coil domain-containing protein 93 OS=Mus musculus OX=10090 GN=Ccdc93 PE=1 SV=1	Q7TQK5	Coiled-coil domain-containing protein 93	Ccdc93	7423	5689	6764	16334	13541	18431	12425	9484		5289	7985	9568	16122	18671	16532	17431	19479	21119		high	29	29	51
	sp|Q9D6J3|YJU2_MOUSE Splicing factor YJU2 OS=Mus musculus OX=10090 GN=Yju2 PE=1 SV=1	Q9D6J3	Coiled-coil domain-containing protein 94	Ccdc94	3558	3673	2877	26173	14658	16551	26351	10775		4198	2759	2704	37826	40236	19209	20181	16181	24840		high	11	11	47.5
	sp|Q9DBT3|CCD97_MOUSE Coiled-coil domain-containing protein 97 OS=Mus musculus OX=10090 GN=Ccdc97 PE=1 SV=1	Q9DBT3	Coiled-coil domain-containing protein 97	Ccdc97	484	877	775	16214	16342	19952	7086	16406		1102	780	1080	16562	19666	36259	25006	21323	14583		high	12	12	44.4
	sp|Q8K2I2|CCHCR_MOUSE Coiled-coil alpha-helical rod protein 1 OS=Mus musculus OX=10090 GN=Cchcr1 PE=2 SV=3	Q8K2I2	Coiled-coil alpha-helical rod protein 1	Cchcr1	0	0	0	26264	0	0	21897	0		0	0	121	0	0	0	0	230	531		medium	6	6	13.5
	sp|Q8K2Y9-2|CCM2_MOUSE Isoform 2 of Cerebral cavernous malformations protein 2 homolog OS=Mus musculus OX=10090 GN=Ccm2	Q8K2Y9-2	Cerebral cavernous malformations protein 2 homolog	Ccm2	17627	21846	21884	27441	23102	16271	24424	24782		15907	20746	21711	13120	13698	8778	14142	17592	12124		low	25	1	65.8
	sp|P51943|CCNA2_MOUSE Cyclin-A2 OS=Mus musculus OX=10090 GN=Ccna2 PE=1 SV=2	P51943	Cyclin-A2	Ccna2	0	0	0	29154	19704	6151	19252	12622		0	0	0	63545	67523	87221	48076	40259	24857		high	10	10	34.1
	sp|P24860|CCNB1_MOUSE G2/mitotic-specific cyclin-B1 OS=Mus musculus OX=10090 GN=Ccnb1 PE=1 SV=3	P24860	G2/mitotic-specific cyclin-B1	Ccnb1	0	0	0	36079	29641	26837	15235	11233		0	0	0	102778	151718	144175	71409	114640	79612		high	11	11	29.3
	sp|P30276|CCNB2_MOUSE G2/mitotic-specific cyclin-B2 OS=Mus musculus OX=10090 GN=Ccnb2 PE=1 SV=2	P30276	G2/mitotic-specific cyclin-B2	Ccnb2	0	0	0	0	579	0	0	0		0	621	0	0	2236	73	1714	1914	942		medium	6	6	19.3
	sp|Q62447|CCNC_MOUSE Cyclin-C OS=Mus musculus OX=10090 GN=Ccnc PE=2 SV=4	Q62447	Cyclin-C	Ccnc	47	0	0	403	580	4335	3114	3868		96	0	0	5954	4899	5461	4450	6326	2734		medium	5	5	22.6
	sp|P30280|CCND2_MOUSE G1/S-specific cyclin-D2 OS=Mus musculus OX=10090 GN=Ccnd2 PE=1 SV=1	P30280;P25322	G1/S-specific cyclin-D2	Ccnd2	0	0	0	5257	6486	4122	0	7392		0	0	0	2823	5643	2418	5333	6761	4142		medium	6	6	31.1
	sp|P30282|CCND3_MOUSE G1/S-specific cyclin-D3 OS=Mus musculus OX=10090 GN=Ccnd3 PE=1 SV=1	P30282	G1/S-specific cyclin-D3	Ccnd3	0	0	0	5440	4728	8605	3782	12759		0	0	0	10077	8320	15195	8461	23852	11605		high	8	8	31.5
	sp|Q61457|CCNE1_MOUSE G1/S-specific cyclin-E1 OS=Mus musculus OX=10090 GN=Ccne1 PE=1 SV=2	Q61457	G1/S-specific cyclin-E1	Ccne1	447	0	0	4415	5636	1021	1930	0		0	0	0	2963	3915	4754	4973	4099	0		medium	7	7	19.4
	sp|Q9Z238|CCNE2_MOUSE G1/S-specific cyclin-E2 OS=Mus musculus OX=10090 GN=Ccne2 PE=1 SV=1	Q9Z238	G1/S-specific cyclin-E2	Ccne2	0	0	0	1219	0	0	549	476		0	0	0	3063	3481	0	3380	3094	485		medium	5	5	21
	sp|Q61458|CCNH_MOUSE Cyclin-H OS=Mus musculus OX=10090 GN=Ccnh PE=1 SV=2	Q61458	Cyclin-H	Ccnh	613	325	94	67302	47025	40381	35123	39443		1091	702	1159	40194	56791	60363	50260	49280	47414		high	16	16	49.8
	sp|O88874|CCNK_MOUSE Cyclin-K OS=Mus musculus OX=10090 GN=Ccnk PE=1 SV=3	O88874	Cyclin-K	Ccnk	4122	3129	5198	48793	37860	31818	33362	38594		3078	3555	5571	43460	53650	91138	40486	43887	44083		high	14	14	31.4
	sp|Q52KE7|CCNL1_MOUSE Cyclin-L1 OS=Mus musculus OX=10090 GN=Ccnl1 PE=1 SV=1;sp|Q52KE7-2|CCNL1_MOUSE Isoform 2 of Cyclin-L1 OS=Mus musculus OX=10090 GN=Ccnl1	Q52KE7;Q52KE7-2	Cyclin-L1	Ccnl1	563	1021	656	3687	4065	4651	4929	4220		856	1038	722	4999	7636	11567	6852	4403	5094		medium	6	6	18.6
	sp|Q9JJA7|CCNL2_MOUSE Cyclin-L2 OS=Mus musculus OX=10090 GN=Ccnl2 PE=1 SV=1;sp|Q9JJA7-3|CCNL2_MOUSE Isoform 3 of Cyclin-L2 OS=Mus musculus OX=10090 GN=Ccnl2;sp|Q9JJA7-2|CCNL2_MOUSE Isoform 2 of Cyclin-L2 OS=Mus musculus OX=10090 GN=Ccnl2	Q9JJA7;Q9JJA7-3;Q9JJA7-2	Cyclin-L2	Ccnl2	1743	1470	2334	8837	11628	12351	9826	10640		1615	3151	2196	12372	6362	17262	42492	13865	7152		high	14	13	35.3
	sp|Q9QWV9|CCNT1_MOUSE Cyclin-T1 OS=Mus musculus OX=10090 GN=Ccnt1 PE=1 SV=3	Q9QWV9	Cyclin-T1	Ccnt1	3629	3446	3469	22575	27026	25040	21200	19963		4325	3270	3920	36144	30722	31642	30858	25213	19010		high	21	20	40.6
	sp|Q7TQK0-2|CCNT2_MOUSE Isoform 2 of Cyclin-T2 OS=Mus musculus OX=10090 GN=Ccnt2;sp|Q7TQK0|CCNT2_MOUSE Cyclin-T2 OS=Mus musculus OX=10090 GN=Ccnt2 PE=1 SV=1	Q7TQK0-2;Q7TQK0		Ccnt2	41	44	57	0	557	0	0	638		36	37	38	0	0	701	0	782	380		medium	6	6	19.2
	sp|Q8BGU5|CCNY_MOUSE Cyclin-Y OS=Mus musculus OX=10090 GN=Ccny PE=1 SV=1;sp|Q8BGU5-2|CCNY_MOUSE Isoform 2 of Cyclin-Y OS=Mus musculus OX=10090 GN=Ccny	Q8BGU5;Q8BGU5-2;A0A087WPI4	Cyclin-Y	Ccny	2659	2202	1637	3719	15765	17557	50133	29450		1219	1452	2803	6570	7427	6509	5227	4542	6241		high	9	7	44
	sp|Q7TSH4|CP110_MOUSE Centriolar coiled-coil protein of 110 kDa OS=Mus musculus OX=10090 GN=Ccp110 PE=1 SV=1	Q7TSH4	Centriolar coiled-coil protein of 110 kDa	Ccp110	0	0	0	1338	499	1433	370	495		0	0	0	2162	2521	2801	1333	2815	1911		high	13	13	20.8
	sp|P47774|CCR7_MOUSE C-C chemokine receptor type 7 OS=Mus musculus OX=10090 GN=Ccr7 PE=1 SV=2	P47774	C-C chemokine receptor type 7	Ccr7	151	0	6804	62510	65760	55971	24507	57226		3180	7991	4829	30740	34768	48553	27793	51875	26747		medium	7	7	21.7
	sp|O35710-2|NOCT_MOUSE Isoform 2 of Nocturnin OS=Mus musculus OX=10090 GN=Noct;sp|O35710|NOCT_MOUSE Nocturnin OS=Mus musculus OX=10090 GN=Noct PE=1 SV=3	O35710-2;O35710	Nocturnin	Ccrn4l	0	0	0	8540	6776	3978	5113	3277		0	0	0	7469	6772	7818	10647	4869	6460		high	11	11	47.9
	sp|Q9WU84|CCS_MOUSE Copper chaperone for superoxide dismutase OS=Mus musculus OX=10090 GN=Ccs PE=1 SV=1	Q9WU84	Copper chaperone for superoxide dismutase	Ccs	2376	4113	3832	17571	19295	1962	10836	11427		4524	6583	4774	14600	8979	14895	2693	11981	3558		high	10	10	34.3
	sp|Q8QZT2|CCSAP_MOUSE Centriole, cilia and spindle-associated protein OS=Mus musculus OX=10090 GN=Ccsap PE=1 SV=1	Q8QZT2	Centriole, cilia and spindle-associated protein	Ccsap	6444	3525	3245	0	0	1418	0	2497		3165	9068	6412	997	884	0	2848	0	0		medium	7	7	32.9
	sp|Q6RUT7|CSMT1_MOUSE Protein CCSMST1 OS=Mus musculus OX=10090 GN=Ccsmst1 PE=1 SV=1	Q6RUT7	Protein CCSMST1	Ccsmst1	0	0	0	0	0	0	0	0		0	0	0	3625	1864	0	0	0	0		low	1	1	18.4
	sp|P80314|TCPB_MOUSE T-complex protein 1 subunit beta OS=Mus musculus OX=10090 GN=Cct2 PE=1 SV=4	P80314	T-complex protein 1 subunit beta	Cct2	95029	125634	152537	2802328	3062931	1902964	1851930	2155602		147220	160808	176156	2960971	3219067	3474924	3042022	3261391	2594838		high	44	44	84.9
	sp|P80318|TCPG_MOUSE T-complex protein 1 subunit gamma OS=Mus musculus OX=10090 GN=Cct3 PE=1 SV=1	P80318	T-complex protein 1 subunit gamma	Cct3	79873	87920	112761	2834699	2003634	1809560	1670705	1727526		141301	173590	154911	2646738	2660577	2868365	2228991	2310541	2237082		high	52	52	82.2
	sp|P80315|TCPD_MOUSE T-complex protein 1 subunit delta OS=Mus musculus OX=10090 GN=Cct4 PE=1 SV=3	P80315	T-complex protein 1 subunit delta	Cct4	101750	147526	154978	2488575	1902629	1772603	1512312	1622694		130761	196369	216648	2554078	2206225	2509975	2285530	2684780	2005340		high	48	48	80
	sp|P80316|TCPE_MOUSE T-complex protein 1 subunit epsilon OS=Mus musculus OX=10090 GN=Cct5 PE=1 SV=1	P80316	T-complex protein 1 subunit epsilon	Cct5	108644	125544	118395	2514797	2022117	1847795	1721963	1667993		145475	167263	190662	2019796	2084665	2307684	1984658	2106567	1910572		high	46	46	79.1
	sp|P80317|TCPZ_MOUSE T-complex protein 1 subunit zeta OS=Mus musculus OX=10090 GN=Cct6a PE=1 SV=3	P80317	T-complex protein 1 subunit zeta	Cct6a	79478	89406	88688	1755961	1381479	1186084	1074979	1373720		105657	141036	117457	1992248	1841853	1873366	1860374	1935277	1685229		high	37	32	75
	sp|Q61390|TCPW_MOUSE T-complex protein 1 subunit zeta-2 OS=Mus musculus OX=10090 GN=Cct6b PE=1 SV=4	Q61390	T-complex protein 1 subunit zeta-2	Cct6b	0	989	789	25439	18334	5619	0	0		1312	0	695	25624	41871	0	23025	24620	15053		low	2	2	14.3
	sp|P80313|TCPH_MOUSE T-complex protein 1 subunit eta OS=Mus musculus OX=10090 GN=Cct7 PE=1 SV=1	P80313	T-complex protein 1 subunit eta	Cct7	53992	55567	65370	1576981	1398911	1147749	846408	1046103		106668	93966	86976	1444506	1354374	1695451	1401944	1658397	1446391		high	41	41	83.1
	sp|P42932|TCPQ_MOUSE T-complex protein 1 subunit theta OS=Mus musculus OX=10090 GN=Cct8 PE=1 SV=3	P42932	T-complex protein 1 subunit theta	Cct8	113671	158905	144907	3212184	2488344	2481461	2155104	2195704		178950	177337	185708	3160857	3439294	3806077	2617516	3066163	2787128		high	52	52	84.3
	sp|Q8C1Y8|CCZ1_MOUSE Vacuolar fusion protein CCZ1 homolog OS=Mus musculus OX=10090 GN=Ccz1 PE=1 SV=1	Q8C1Y8	Vacuolar fusion protein CCZ1 homolog	Ccz1	623	704	976	12155	15037	14242	17863	10697		800	1987	1938	21154	16967	25062	16354	15690	12396		high	23	23	60
	sp|P11609|CD1D1_MOUSE Antigen-presenting glycoprotein CD1d1 OS=Mus musculus OX=10090 GN=Cd1d1 PE=1 SV=3;sp|P11610|CD1D2_MOUSE Antigen-presenting glycoprotein CD1d2 OS=Mus musculus OX=10090 GN=Cd1d2 PE=1 SV=2	P11609;P11610	Antigen-presenting glycoprotein CD1d1;Antigen-presenting glycoprotein CD1d2	Cd1d1;Cd1d2	3769	4603	4123	1071	467	0	657	0		1644	2291	4126	0	0	0	0	165	0		medium	6	6	21.1
	sp|P08920|CD2_MOUSE T-cell surface antigen CD2 OS=Mus musculus OX=10090 GN=Cd2 PE=1 SV=1	P08920	T-cell surface antigen CD2	Cd2	10329	10208	10091	140768	100530	84696	114906	120286		6558	7980	14043	45720	55029	34586	52932	64229	25225		high	12	12	35.5
	sp|O54901|OX2G_MOUSE OX-2 membrane glycoprotein OS=Mus musculus OX=10090 GN=Cd200 PE=1 SV=1	O54901	OX-2 membrane glycoprotein	Cd200	0	0	0	46239	43127	39900	36481	49852		0	0	0	49240	39016	50264	35988	65399	28650		medium	4	4	18.3
	sp|Q8CJ91-3|C209B_MOUSE Isoform 3 of CD209 antigen-like protein B OS=Mus musculus OX=10090 GN=Cd209b;sp|Q8CJ91-2|C209B_MOUSE Isoform 2 of CD209 antigen-like protein B OS=Mus musculus OX=10090 GN=Cd209b;sp|Q8CJ91|C209B_MOUSE CD209 antigen-like protein B OS=	Q8CJ91-3;Q8CJ91-2;Q8CJ91;Q8CJ91-4	CD209 antigen-like protein B	Cd209b	3055	0	353	1943	11353	4088	20371	3772		0	0	210	12042	3621	11512	14783	7089	298		high	12	12	50.3
	sp|Q8K4F0|CD226_MOUSE CD226 antigen OS=Mus musculus OX=10090 GN=Cd226 PE=1 SV=1	Q8K4F0	CD226 antigen	Cd226	30	288	221	26576	5787	5858	16795	7870		1678	3632	3407	69224	85133	49260	52050	55569	55112		high	8	8	36.3
	sp|P24161|CD3Z_MOUSE T-cell surface glycoprotein CD3 zeta chain OS=Mus musculus OX=10090 GN=Cd247 PE=1 SV=1;sp|P24161-2|CD3Z_MOUSE Isoform CD-3-eta of T-cell surface glycoprotein CD3 zeta chain OS=Mus musculus OX=10090 GN=Cd247	P24161;P24161-2	T-cell surface glycoprotein CD3 zeta chain	Cd247	39769	28795	40580	232005	133049	84328	117307	137699		38194	49840	57951	141335	83313	98656	89516	159040	60953		high	11	11	51.2
	sp|P41272|CD27_MOUSE CD27 antigen OS=Mus musculus OX=10090 GN=Cd27 PE=2 SV=1	P41272	CD27 antigen	Cd27	263	0	1047	2292	0	0	0	934		0	948	610	10458	5086	2053	5778	4343	0		high	9	9	54
	sp|Q9EP73|PD1L1_MOUSE Programmed cell death 1 ligand 1 OS=Mus musculus OX=10090 GN=Cd274 PE=1 SV=1	Q9EP73	Programmed cell death 1 ligand 1	Cd274	361	482	295	13979	11011	10110	9577	12774		833	444	808	7363	8674	10930	9829	8367	8386		medium	4	4	28.6
	sp|P31041|CD28_MOUSE T-cell-specific surface glycoprotein CD28 OS=Mus musculus OX=10090 GN=Cd28 PE=1 SV=2	P31041	T-cell-specific surface glycoprotein CD28	Cd28	2381	4239	4175	50421	19200	12897	6555	27868		1030	1230	2356	31456	24721	24907	16044	37373	2157		medium	6	6	28
	sp|Q9JLQ0|CD2AP_MOUSE CD2-associated protein OS=Mus musculus OX=10090 GN=Cd2ap PE=1 SV=3	Q9JLQ0	CD2-associated protein	Cd2ap	10448	12914	16883	66714	47537	44548	34835	40304		13349	13903	15471	51113	57523	49609	36078	58642	37351		high	25	25	45.5
	sp|Q9CWK3|CD2B2_MOUSE CD2 antigen cytoplasmic tail-binding protein 2 OS=Mus musculus OX=10090 GN=Cd2bp2 PE=1 SV=1	Q9CWK3	CD2 antigen cytoplasmic tail-binding protein 2	Cd2bp2	1846	3103	3577	59942	48878	41663	28511	26898		5851	7877	5483	53116	43079	70802	44580	52164	52261		high	13	13	51.5
	sp|Q61470|CD37_MOUSE Leukocyte antigen CD37 OS=Mus musculus OX=10090 GN=Cd37 PE=1 SV=1	Q61470	Leukocyte antigen CD37	Cd37	3670	3053	1507	4420	1610	4172	4661	9688		2690	1063	3697	3395	3524	3820	1717	10339	7669		medium	5	5	19.6
	sp|P56528|CD38_MOUSE ADP-ribosyl cyclase/cyclic ADP-ribose hydrolase 1 OS=Mus musculus OX=10090 GN=Cd38 PE=1 SV=2	P56528	ADP-ribosyl cyclase/cyclic ADP-ribose hydrolase 1	Cd38	0	0	0	0	657	0	0	0		145	305	0	0	0	0	0	750	0		medium	3	3	13.2
	sp|P04235|CD3D_MOUSE T-cell surface glycoprotein CD3 delta chain OS=Mus musculus OX=10090 GN=Cd3d PE=1 SV=1	P04235	T-cell surface glycoprotein CD3 delta chain	Cd3d	32916	32283	39278	53437	47367	70656	19715	60596		24311	38727	41416	73970	76235	65079	77144	61202	34871		high	8	8	32.4
	sp|P22646|CD3E_MOUSE T-cell surface glycoprotein CD3 epsilon chain OS=Mus musculus OX=10090 GN=Cd3e PE=1 SV=2	P22646	T-cell surface glycoprotein CD3 epsilon chain	Cd3e	141109	128758	160962	90629	75067	58993	62935	74304		112508	161178	158720	113254	104871	119051	87583	109776	99984		high	9	9	49.7
	sp|Q76KJ5|RPA34_MOUSE DNA-directed RNA polymerase I subunit RPA34 OS=Mus musculus OX=10090 GN=Polr1g PE=1 SV=2	Q76KJ5	DNA-directed RNA polymerase I subunit RPA34	Cd3eap	5936	5410	6971	114294	94743	86353	62457	70667		8185	11761	9880	207626	176896	178563	96300	172098	121973		high	19	19	66.4
	sp|P11942|CD3G_MOUSE T-cell surface glycoprotein CD3 gamma chain OS=Mus musculus OX=10090 GN=Cd3g PE=1 SV=1	P11942	T-cell surface glycoprotein CD3 gamma chain	Cd3g	2648	2169	4411	15035	2871	4103	5331	3673		6386	4430	10028	21275	8984	1864	16253	25092	1680		high	9	9	41.2
	sp|P06332|CD4_MOUSE T-cell surface glycoprotein CD4 OS=Mus musculus OX=10090 GN=Cd4 PE=1 SV=1	P06332;P06332-2	T-cell surface glycoprotein CD4	Cd4	39017	42436	45614	232086	152393	113253	126561	140388		0	0	0	0	238	0	0	0	0		high	18	18	39.6
	sp|P27512|TNR5_MOUSE Tumor necrosis factor receptor superfamily member 5 OS=Mus musculus OX=10090 GN=Cd40 PE=1 SV=3;sp|P27512-5|TNR5_MOUSE Isoform V of Tumor necrosis factor receptor superfamily member 5 OS=Mus musculus OX=10090 GN=Cd40;sp|P27512-4|TNR5_MO	P27512;P27512-5;P27512-4;P27512-3;P27512-2	Tumor necrosis factor receptor superfamily member 5	Cd40	0	0	0	0	1038	1011	0	1603		0	0	0	0	5591	0	555	2547	1766		medium	6	6	36
	sp|P15379-2|CD44_MOUSE Isoform 13 of CD44 antigen OS=Mus musculus OX=10090 GN=Cd44;sp|P15379-3|CD44_MOUSE Isoform 12 of CD44 antigen OS=Mus musculus OX=10090 GN=Cd44;sp|P15379-6|CD44_MOUSE Isoform 7 of CD44 antigen OS=Mus musculus OX=10090 GN=Cd44;sp|P1537	P15379-2;P15379-3;P15379-6;P15379-11;P15379-5;P15379-10;P15379-9;P15379-4;P15379-8;P15379-7;P15379;P15379-12;P15379-13	CD44 antigen	Cd44	8370	3018	3698	92939	73267	72864	77932	47377		846	394	0	73694	42121	69461	51862	56717	39198		high	8	8	25.3
	sp|Q61735-2|CD47_MOUSE Isoform 2 of Leukocyte surface antigen CD47 OS=Mus musculus OX=10090 GN=Cd47	Q61735-2	Leukocyte surface antigen CD47	Cd47	21443	19469	18259	102846	255032	76575	109483	107474		10535	24801	23937	69668	72229	111539	40723	71322	54099		low	7	2	24.1
	sp|Q61735|CD47_MOUSE Leukocyte surface antigen CD47 OS=Mus musculus OX=10090 GN=Cd47 PE=1 SV=2	Q61735	Leukocyte surface antigen CD47	Cd47	2170	2575	2557	13378	18971	11345	18188	11934		1657	3366	2476	12793	1990	14381	19066	13639	15944		low	1	1	20.1
	sp|P18181|CD48_MOUSE CD48 antigen OS=Mus musculus OX=10090 GN=Cd48 PE=1 SV=1	P18181	CD48 antigen	Cd48	29520	16510	21763	126183	65712	57496	74193	51308		23055	43837	37582	79859	82675	66958	65027	95108	55001		high	12	12	44.2
	sp|P13379|CD5_MOUSE T-cell surface glycoprotein CD5 OS=Mus musculus OX=10090 GN=Cd5 PE=1 SV=1	P13379	T-cell surface glycoprotein CD5	Cd5	64083	73934	67114	280584	133821	141689	122292	179800		30333	48718	41655	165101	125412	168197	75626	101156	71985		high	20	20	47.8
	sp|Q61475|DAF1_MOUSE Complement decay-accelerating factor, GPI-anchored OS=Mus musculus OX=10090 GN=Cd55 PE=1 SV=2	Q61475;Q61476	Complement decay-accelerating factor, GPI-anchored	Cd55	157	1065	687	0	0	431	0	633		488	585	1381	0	0	0	0	0	580		medium	6	6	34.1
	sp|Q61003-2|CD6_MOUSE Isoform 2 of T-cell differentiation antigen CD6 OS=Mus musculus OX=10090 GN=Cd6;sp|Q61003|CD6_MOUSE T-cell differentiation antigen CD6 OS=Mus musculus OX=10090 GN=Cd6 PE=1 SV=2;sp|Q61003-3|CD6_MOUSE Isoform 3 of T-cell differentiation	Q61003-2;Q61003;Q61003-3	T-cell differentiation antigen CD6	Cd6	10686	9795	9969	45033	26444	16686	14397	20476		4791	6399	9250	45475	17406	40882	25987	26735	19324		high	20	20	50.7
	sp|P37217|CD69_MOUSE Early activation antigen CD69 OS=Mus musculus OX=10090 GN=Cd69 PE=2 SV=1	P37217	Early activation antigen CD69	Cd69	156	0	0	450291	335329	222843	150737	266103		0	0	685	369783	316620	454414	291014	393162	346762		high	12	12	53.8
	sp|P21855|CD72_MOUSE B-cell differentiation antigen CD72 OS=Mus musculus OX=10090 GN=Cd72 PE=1 SV=2	P21855	B-cell differentiation antigen CD72	Cd72	168	0	0	0	0	829	0	1239		1957	891	1217	2447	1493	1570	0	0	1740		medium	5	5	25.7
	sp|P04441-2|HG2A_MOUSE Isoform Short of H-2 class II histocompatibility antigen gamma chain OS=Mus musculus OX=10090 GN=Cd74;sp|P04441|HG2A_MOUSE H-2 class II histocompatibility antigen gamma chain OS=Mus musculus OX=10090 GN=Cd74 PE=1 SV=3	P04441-2;P04441	H-2 class II histocompatibility antigen gamma chain	Cd74	0	0	0	3590	9742	0	7236	8126		0	0	0	0	1057	0	0	1108	0		medium	5	5	28.8
	sp|P11911|CD79A_MOUSE B-cell antigen receptor complex-associated protein alpha chain OS=Mus musculus OX=10090 GN=Cd79a PE=1 SV=2	P11911	B-cell antigen receptor complex-associated protein alpha chain	Cd79a	0	0	0	0	0	0	1592	0		0	0	0	1661	3698	0	0	1000	0		low	1	1	10
	sp|P35762|CD81_MOUSE CD81 antigen OS=Mus musculus OX=10090 GN=Cd81 PE=1 SV=2	P35762	CD81 antigen	Cd81	0	0	0	0	0	2002	0	5184		0	0	0	0	0	0	0	0	0		low	2	2	17.8
	sp|P40237|CD82_MOUSE CD82 antigen OS=Mus musculus OX=10090 GN=Cd82 PE=1 SV=1	P40237	CD82 antigen	Cd82	7793	7962	7010	55733	18740	52839	53807	63988		5397	10799	10391	0	3319	34971	2324	41578	44595		medium	5	5	13.2
	sp|O88324|CD83_MOUSE CD83 antigen OS=Mus musculus OX=10090 GN=Cd83 PE=2 SV=1	O88324	CD83 antigen	Cd83	0	0	0	0	0	0	0	0		0	0	0	0	0	0	1786	3673	0		low	1	1	7.7
	sp|Q18PI6|SLAF5_MOUSE SLAM family member 5 OS=Mus musculus OX=10090 GN=Cd84 PE=1 SV=1	Q18PI6;Q18PI6-2	SLAM family member 5	Cd84	7966	7953	5558	15282	16659	0	6491	4254		6314	7903	7850	5331	185	12903	23971	9490	17153		low	10	2	29.2
	sp|P42082-2|CD86_MOUSE Isoform 2 of T-lymphocyte activation antigen CD86 OS=Mus musculus OX=10090 GN=Cd86;sp|P42082|CD86_MOUSE T-lymphocyte activation antigen CD86 OS=Mus musculus OX=10090 GN=Cd86 PE=2 SV=1	P42082-2;P42082	T-lymphocyte activation antigen CD86	Cd86	234	208	222	0	0	0	0	0		1162	2686	3218	0	0	2716	3652	1634	0		medium	4	4	14.9
	sp|P01731|CD8A_MOUSE T-cell surface glycoprotein CD8 alpha chain OS=Mus musculus OX=10090 GN=Cd8a PE=1 SV=1	P01731	T-cell surface glycoprotein CD8 alpha chain	Cd8a	0	0	0	0	1628	0	0	0		22653	48850	45275	153242	75227	235768	131567	67084	125170		medium	5	5	15.8
	sp|P10300|CD8B_MOUSE T-cell surface glycoprotein CD8 beta chain OS=Mus musculus OX=10090 GN=Cd8b PE=1 SV=1	P10300	T-cell surface glycoprotein CD8 beta chain	Cd8b	219	0	0	0	10650	1787	1217	2257		98484	112555	141502	501435	413599	647762	264373	579879	465169		high	11	11	47.9
	sp|P40240|CD9_MOUSE CD9 antigen OS=Mus musculus OX=10090 GN=Cd9 PE=1 SV=2	P40240	CD9 antigen	Cd9	1340	3997	3960	2677	1624	3487	1803	1880		92	678	1161	1864	2119	4908	0	0	0		medium	5	5	27.9
	sp|Q3U0X8|TACT_MOUSE T-cell surface protein tactile OS=Mus musculus OX=10090 GN=Cd96 PE=2 SV=1	Q3U0X8	T-cell surface protein tactile	Cd96	518	646	0	1228	1858	1773	605	1831		0	0	0	0	2598	3245	2769	3764	2652		medium	5	5	10.5
	sp|Q9Z0M6|AGRE5_MOUSE Adhesion G protein-coupled receptor E5 OS=Mus musculus OX=10090 GN=Adgre5 PE=1 SV=2;sp|Q9Z0M6-2|AGRE5_MOUSE Isoform 2 of Adhesion G protein-coupled receptor E5 OS=Mus musculus OX=10090 GN=Adgre5;sp|Q9Z0M6-3|AGRE5_MOUSE Isoform 3 of Ad	Q9Z0M6;Q9Z0M6-2;Q9Z0M6-3	CD97 antigen	Cd97	2342	3235	3171	10360	7907	6605	5478	4844		3197	4783	3301	19012	14899	14546	9749	16825	10980		high	18	18	29
	sp|Q8BMD5-3|CDAC1_MOUSE Isoform 3 of Cytidine and dCMP deaminase domain-containing protein 1 OS=Mus musculus OX=10090 GN=Cdadc1;sp|Q8BMD5-2|CDAC1_MOUSE Isoform 2 of Cytidine and dCMP deaminase domain-containing protein 1 OS=Mus musculus OX=10090 GN=Cdadc1;	Q8BMD5-3;Q8BMD5-2;Q8BMD5-4;Q8BMD5;Q8BMD5-6	Cytidine and dCMP deaminase domain-containing protein 1	Cdadc1	225	233	0	0	0	0	858	0		87	240	270	0	0	0	0	0	0		medium	4	4	12.7
	sp|Q8CC12|CDAN1_MOUSE Codanin-1 OS=Mus musculus OX=10090 GN=Cdan1 PE=1 SV=2;sp|Q8CC12-2|CDAN1_MOUSE Isoform 2 of Codanin-1 OS=Mus musculus OX=10090 GN=Cdan1;sp|Q8CC12-3|CDAN1_MOUSE Isoform 3 of Codanin-1 OS=Mus musculus OX=10090 GN=Cdan1	Q8CC12;Q8CC12-2;Q8CC12-3	Codanin-1	Cdan1	89	12667	25018	324	158	0	84	1006		28414	74	2683	165	0	144	752	685	623		high	13	13	14.9
	sp|Q8CII2|CD123_MOUSE Cell division cycle protein 123 homolog OS=Mus musculus OX=10090 GN=Cdc123 PE=1 SV=2	Q8CII2;Q8CII2-2	Cell division cycle protein 123 homolog	Cdc123	872	643	1122	53591	12610	21408	19902	26732		903	2100	1026	40167	49552	36693	37999	27756	22182		high	15	15	53
	sp|Q8R349|CDC16_MOUSE Cell division cycle protein 16 homolog OS=Mus musculus OX=10090 GN=Cdc16 PE=1 SV=1	Q8R349	Cell division cycle protein 16 homolog	Cdc16	1688	2148	2229	28865	25214	20274	15572	27413		3672	5071	3870	31972	31470	38269	36230	48093	36313		high	21	21	46.5
	sp|Q9JJ66|CDC20_MOUSE Cell division cycle protein 20 homolog OS=Mus musculus OX=10090 GN=Cdc20 PE=1 SV=2	Q9JJ66	Cell division cycle protein 20 homolog	Cdc20	0	0	0	6946	8690	2480	2719	700		0	0	0	13691	24575	23838	15785	10694	17294		high	16	16	49.9
	sp|Q8BGZ4|CDC23_MOUSE Cell division cycle protein 23 homolog OS=Mus musculus OX=10090 GN=Cdc23 PE=1 SV=2;sp|Q8BGZ4-2|CDC23_MOUSE Isoform 2 of Cell division cycle protein 23 homolog OS=Mus musculus OX=10090 GN=Cdc23	Q8BGZ4;Q8BGZ4-2	Cell division cycle protein 23 homolog	Cdc23	877	996	834	30966	22873	17731	13057	16778		1489	2824	1761	34715	34958	56196	25103	40917	30071		high	24	24	44.6
	sp|A2A6Q5|CDC27_MOUSE Cell division cycle protein 27 homolog OS=Mus musculus OX=10090 GN=Cdc27 PE=1 SV=1;sp|A2A6Q5-3|CDC27_MOUSE Isoform 3 of Cell division cycle protein 27 homolog OS=Mus musculus OX=10090 GN=Cdc27;sp|A2A6Q5-2|CDC27_MOUSE Isoform 2 of Cell	A2A6Q5;A2A6Q5-3;A2A6Q5-2	Cell division cycle protein 27 homolog	Cdc27	85	167	226	8648	11456	9520	6154	7016		0	269	84	15175	16248	16277	9393	12298	9205		high	23	23	43.6
	sp|Q8CFI2|UB2R1_MOUSE Ubiquitin-conjugating enzyme E2 R1 OS=Mus musculus OX=10090 GN=Cdc34 PE=1 SV=1	Q8CFI2	Ubiquitin-conjugating enzyme E2 R1	Cdc34	1230	0	757	1993	23357	18557	16624	31105		1680	103	1937	62056	72418	55339	23679	83930	1461		high	9	8	29.8
	sp|Q61081|CDC37_MOUSE Hsp90 co-chaperone Cdc37 OS=Mus musculus OX=10090 GN=Cdc37 PE=1 SV=1	Q61081	Hsp90 co-chaperone Cdc37;Hsp90 co-chaperone Cdc37, N-terminally processed	Cdc37	59224	69968	76634	659614	484293	487723	508184	488389		99410	69633	95673	637332	629835	731241	529812	698637	510884		high	21	21	52.8
	sp|Q9CZP7-2|CD37L_MOUSE Isoform 2 of Hsp90 co-chaperone Cdc37-like 1 OS=Mus musculus OX=10090 GN=Cdc37l1;sp|Q9CZP7-3|CD37L_MOUSE Isoform 3 of Hsp90 co-chaperone Cdc37-like 1 OS=Mus musculus OX=10090 GN=Cdc37l1;sp|Q9CZP7-4|CD37L_MOUSE Isoform 4 of Hsp90 co-	Q9CZP7-2;Q9CZP7-3;Q9CZP7-4;Q9CZP7	Hsp90 co-chaperone Cdc37-like 1	Cdc37l1	0	0	135	4881	0	2392	2135	0		0	158	0	2371	1603	0	2457	1109	0		medium	7	7	36.5
	sp|Q9DC48|PRP17_MOUSE Pre-mRNA-processing factor 17 OS=Mus musculus OX=10090 GN=Cdc40 PE=2 SV=1	Q9DC48	Pre-mRNA-processing factor 17	Cdc40	8857	8864	7650	89753	74368	62171	79442	91356		8762	13902	13580	81250	78065	70952	87314	80339	70713		high	40	40	74.8
	sp|P60766|CDC42_MOUSE Cell division control protein 42 homolog OS=Mus musculus OX=10090 GN=Cdc42 PE=1 SV=2	P60766;Q9ER71-2;Q9ER71	Cell division control protein 42 homolog	Cdc42	150157	134498	194248	995130	1121857	1138119	1037479	1155336		238425	238974	213380	1010554	859976	551371	719843	924710	768976		low	11	3	63.4
	sp|P60766-1|CDC42_MOUSE Isoform 1 of Cell division control protein 42 homolog OS=Mus musculus OX=10090 GN=Cdc42	P60766-1	Cell division control protein 42 homolog	Cdc42	156	146	0	0	0	0	1494	0		0	0	0	2177	0	0	0	0	1991		low	2	2	63.9
	sp|Q8BGH7|C42S2_MOUSE CDC42 small effector protein 2 OS=Mus musculus OX=10090 GN=Cdc42se2 PE=1 SV=1	Q8BGH7	CDC42 small effector protein 2	Cdc42se2	3940	1142	3235	35005	13954	15386	20643	19059		709	7888	6866	26340	15519	21341	12833	10336	10969		low	2	2	66.7
	sp|Q9Z1X9|CDC45_MOUSE Cell division control protein 45 homolog OS=Mus musculus OX=10090 GN=Cdc45 PE=1 SV=2	Q9Z1X9	Cell division control protein 45 homolog	Cdc45	0	0	0	16291	10016	15296	17194	8958		0	0	0	33933	26716	27794	26052	24328	18303		high	15	15	34.6
	sp|Q6A068|CDC5L_MOUSE Cell division cycle 5-like protein OS=Mus musculus OX=10090 GN=Cdc5l PE=1 SV=2	Q6A068	Cell division cycle 5-like protein	Cdc5l	35575	68144	38087	298733	184913	159011	190979	199342		68969	56094	79496	237817	238885	216634	201833	257736	188207		high	59	59	75.6
	sp|O89033|CDC6_MOUSE Cell division control protein 6 homolog OS=Mus musculus OX=10090 GN=Cdc6 PE=1 SV=2	O89033	Cell division control protein 6 homolog	Cdc6	0	0	0	8085	5292	4366	278	2850		0	0	0	7451	16423	10631	8008	9549	4347		high	15	15	32
	sp|Q9Z0H0|CDC7_MOUSE Cell division cycle 7-related protein kinase OS=Mus musculus OX=10090 GN=Cdc7 PE=1 SV=2;sp|Q9Z0H0-2|CDC7_MOUSE Isoform 2 of Cell division cycle 7-related protein kinase OS=Mus musculus OX=10090 GN=Cdc7	Q9Z0H0;Q9Z0H0-2	Cell division cycle 7-related protein kinase	Cdc7	0	0	0	4308	1333	2123	698	490		0	0	0	5458	5245	4223	2436	5881	1913		high	13	13	31.9
	sp|Q8JZM7|CDC73_MOUSE Parafibromin OS=Mus musculus OX=10090 GN=Cdc73 PE=1 SV=1	Q8JZM7	Parafibromin	Cdc73	7744	10854	14992	116108	127618	98680	95447	94622		15672	17877	17098	119510	126614	158768	197341	142661	127142		high	37	37	64.4
	sp|Q14B71|CDCA2_MOUSE Cell division cycle-associated protein 2 OS=Mus musculus OX=10090 GN=Cdca2 PE=1 SV=2;sp|Q14B71-2|CDCA2_MOUSE Isoform 2 of Cell division cycle-associated protein 2 OS=Mus musculus OX=10090 GN=Cdca2	Q14B71;Q14B71-2	Cell division cycle-associated protein 2	Cdca2	0	0	0	6976	4145	4092	2027	2703		0	0	0	8061	8652	11322	7223	11459	6866		high	26	26	44.1
	sp|Q9CWM2|CDCA4_MOUSE Cell division cycle-associated protein 4 OS=Mus musculus OX=10090 GN=Cdca4 PE=2 SV=2	Q9CWM2	Cell division cycle-associated protein 4	Cdca4	0	0	0	4237	2217	1634	0	1777		0	0	0	3425	3989	2013	2078	3102	826		low	2	2	19
	sp|Q9CPY3|CDCA5_MOUSE Sororin OS=Mus musculus OX=10090 GN=Cdca5 PE=1 SV=1	Q9CPY3;Q9CPY3-2	Sororin	Cdca5	0	0	0	18788	1513	11999	8028	4999		0	1355	1099	16935	23477	25336	24924	20570	16001		high	10	10	51.5
	sp|Q9D0M2|CDCA7_MOUSE Cell division cycle-associated protein 7 OS=Mus musculus OX=10090 GN=Cdca7 PE=1 SV=1	Q9D0M2	Cell division cycle-associated protein 7	Cdca7	0	0	0	37768	12267	13902	13729	10826		0	0	0	36247	44053	10188	15474	38012	18908		high	12	12	44.2
	sp|Q922M5|CDA7L_MOUSE Cell division cycle-associated 7-like protein OS=Mus musculus OX=10090 GN=Cdca7l PE=1 SV=1	Q922M5	Cell division cycle-associated 7-like protein	Cdca7l	301	667	762	19681	7323	6246	8255	18196		0	938	641	16826	21611	21439	18588	19936	5952		high	14	13	32
	sp|Q8BHX3|BOREA_MOUSE Borealin OS=Mus musculus OX=10090 GN=Cdca8 PE=1 SV=2;sp|Q8BHX3-2|BOREA_MOUSE Isoform 2 of Borealin OS=Mus musculus OX=10090 GN=Cdca8	Q8BHX3;Q8BHX3-2;Q8BHX3-3	Borealin	Cdca8	0	0	0	46709	28847	26494	23559	8790		590	0	0	121757	71320	77286	91497	103726	83354		high	15	15	60.2
	sp|Q5RJH3|CAD12_MOUSE Cadherin-12 OS=Mus musculus OX=10090 GN=Cdh12 PE=2 SV=1	Q5RJH3	Cadherin-12	Cdh12	0	0	0	41854	519	0	34578	7010		0	0	0	0	23733	0	877	35482	0		low	2	2	2.4
	sp|Q8VDP6|CDIPT_MOUSE CDP-diacylglycerol--inositol 3-phosphatidyltransferase OS=Mus musculus OX=10090 GN=Cdipt PE=1 SV=1	Q8VDP6	CDP-diacylglycerol--inositol 3-phosphatidyltransferase	Cdipt	5721	3631	7447	60861	65270	73819	65083	93326		1663	8438	13324	47089	30312	60515	53447	46340	60509		medium	6	6	25.4
	sp|P11440|CDK1_MOUSE Cyclin-dependent kinase 1 OS=Mus musculus OX=10090 GN=Cdk1 PE=1 SV=3	P11440	Cyclin-dependent kinase 1	Cdk1	0	388	581	160815	115632	116404	94175	165478		343	852	350	303055	380600	545080	309867	281691	315329		high	20	19	76.4
	sp|Q3UMM4|CDK10_MOUSE Cyclin-dependent kinase 10 OS=Mus musculus OX=10090 GN=Cdk10 PE=1 SV=1	Q3UMM4	Cyclin-dependent kinase 10	Cdk10	322	258	466	13232	2799	1468	1399	1408		0	1181	650	4294	2828	5435	6021	1812	2176		high	9	9	24.4
	sp|P24788|CD11B_MOUSE Cyclin-dependent kinase 11B OS=Mus musculus OX=10090 GN=Cdk11b PE=1 SV=2;sp|P24788-2|CD11B_MOUSE Isoform 2 of Cyclin-dependent kinase 11B OS=Mus musculus OX=10090 GN=Cdk11b	P24788;P24788-2	Cyclin-dependent kinase 11B	Cdk11b	4916	10108	10068	49922	57709	40073	36321	41002		8763	12352	12350	62077	41157	64345	64993	49746	46977		high	36	35	42.6
	sp|Q14AX6|CDK12_MOUSE Cyclin-dependent kinase 12 OS=Mus musculus OX=10090 GN=Cdk12 PE=1 SV=2;sp|Q14AX6-3|CDK12_MOUSE Isoform 3 of Cyclin-dependent kinase 12 OS=Mus musculus OX=10090 GN=Cdk12;sp|Q14AX6-2|CDK12_MOUSE Isoform 2 of Cyclin-dependent kinase 12 O	Q14AX6;Q14AX6-3;Q14AX6-2	Cyclin-dependent kinase 12	Cdk12	543	962	1111	4884	2444	2889	3209	2956		1334	1535	968	4070	5735	3777	2552	2623	2079		high	24	24	25.1
	sp|Q69ZA1|CDK13_MOUSE Cyclin-dependent kinase 13 OS=Mus musculus OX=10090 GN=Cdk13 PE=1 SV=3;sp|Q69ZA1-2|CDK13_MOUSE Isoform 2 of Cyclin-dependent kinase 13 OS=Mus musculus OX=10090 GN=Cdk13	Q69ZA1;Q69ZA1-2	Cyclin-dependent kinase 13	Cdk13	600	1196	1231	9564	7009	5002	5814	6057		1372	1655	2010	7498	6356	7693	5964	10780	3465		high	31	27	30.4
	sp|Q8K0D0|CDK17_MOUSE Cyclin-dependent kinase 17 OS=Mus musculus OX=10090 GN=Cdk17 PE=1 SV=2;sp|Q8K0D0-2|CDK17_MOUSE Isoform 2 of Cyclin-dependent kinase 17 OS=Mus musculus OX=10090 GN=Cdk17	Q8K0D0;Q8K0D0-2;Q04899	Cyclin-dependent kinase 17	Cdk17	2181	2991	1746	13250	15374	14437	18017	19531		3698	4015	5372	17032	15463	27041	14809	15558	9628		high	28	21	63.5
	sp|Q8BWD8|CDK19_MOUSE Cyclin-dependent kinase 19 OS=Mus musculus OX=10090 GN=Cdk19 PE=2 SV=1	Q8BWD8	Cyclin-dependent kinase 19	Cdk19	1630	2362	881	1426	373	288	1186	887		1637	2288	2076	974	686	832	354	0	0		medium	10	6	29.3
	sp|P97377|CDK2_MOUSE Cyclin-dependent kinase 2 OS=Mus musculus OX=10090 GN=Cdk2 PE=1 SV=2;sp|P97377-2|CDK2_MOUSE Isoform CDK2-alpha of Cyclin-dependent kinase 2 OS=Mus musculus OX=10090 GN=Cdk2	P97377;P97377-2;Q80YP0;Q80YP0-2	Cyclin-dependent kinase 2	Cdk2	2374	2087	3454	89031	43485	59920	51132	43247		596	97	139	101177	50699	87823	69450	37921	52095		high	16	16	58.7
	sp|P30285|CDK4_MOUSE Cyclin-dependent kinase 4 OS=Mus musculus OX=10090 GN=Cdk4 PE=1 SV=1	P30285	Cyclin-dependent kinase 4	Cdk4	78	0	224	205989	50324	65566	82174	67954		571	0	157	171164	165790	91017	92305	131299	77197		high	16	16	64.7
	sp|P49615|CDK5_MOUSE Cyclin-dependent-like kinase 5 OS=Mus musculus OX=10090 GN=Cdk5 PE=1 SV=1	P49615	Cyclin-dependent-like kinase 5	Cdk5	3787	4341	3381	9119	5072	7295	9741	6644		4346	6086	6286	6865	5307	8497	5480	5432	5306		high	13	13	47.9
	sp|Q8BTW8|CK5P1_MOUSE Mitochondrial tRNA methylthiotransferase CDK5RAP1 OS=Mus musculus OX=10090 GN=Cdk5rap1 PE=1 SV=2	Q8BTW8	CDK5 regulatory subunit-associated protein 1	Cdk5rap1	0	66	0	3786	3396	4432	1798	4448		0	0	0	1226	2572	546	4217	1473	2174		high	11	11	24
	sp|Q8K389|CK5P2_MOUSE CDK5 regulatory subunit-associated protein 2 OS=Mus musculus OX=10090 GN=Cdk5rap2 PE=1 SV=3	Q8K389	CDK5 regulatory subunit-associated protein 2	Cdk5rap2	0	56	122	1352	497	442	496	508		141	220	321	1542	1017	3592	2553	1203	1904		high	29	29	21.8
	sp|Q99LM2|CK5P3_MOUSE CDK5 regulatory subunit-associated protein 3 OS=Mus musculus OX=10090 GN=Cdk5rap3 PE=1 SV=1	Q99LM2	CDK5 regulatory subunit-associated protein 3	Cdk5rap3	1105	2870	2780	16644	14246	15374	20517	11516		919	3491	1576	21091	19523	15157	18581	22763	12169		high	23	22	53.7
	sp|Q64261|CDK6_MOUSE Cyclin-dependent kinase 6 OS=Mus musculus OX=10090 GN=Cdk6 PE=1 SV=2	Q64261	Cyclin-dependent kinase 6	Cdk6	0	217	194	160307	86330	101645	59109	119458		573	382	281	316368	284693	214767	280608	211206	100214		high	19	19	64.7
	sp|Q03147|CDK7_MOUSE Cyclin-dependent kinase 7 OS=Mus musculus OX=10090 GN=Cdk7 PE=1 SV=2	Q03147	Cyclin-dependent kinase 7	Cdk7	1610	1675	869	31145	21823	35150	29064	26079		1047	2372	4127	37101	56474	51292	26532	42395	31754		high	14	13	53.5
	sp|Q8R3L8|CDK8_MOUSE Cyclin-dependent kinase 8 OS=Mus musculus OX=10090 GN=Cdk8 PE=1 SV=3;sp|Q8R3L8-3|CDK8_MOUSE Isoform 3 of Cyclin-dependent kinase 8 OS=Mus musculus OX=10090 GN=Cdk8	Q8R3L8;Q8R3L8-3;Q8R3L8-2	Cyclin-dependent kinase 8	Cdk8	0	0	0	1524	0	590	180	623		0	0	0	1887	3745	3993	1801	3797	1208		medium	6	6	39.9
	sp|Q99J95|CDK9_MOUSE Cyclin-dependent kinase 9 OS=Mus musculus OX=10090 GN=Cdk9 PE=1 SV=1;sp|Q99J95-2|CDK9_MOUSE Isoform 2 of Cyclin-dependent kinase 9 OS=Mus musculus OX=10090 GN=Cdk9	Q99J95;Q99J95-2;O35495-3;O35495-2;O35495	Cyclin-dependent kinase 9	Cdk9	3056	1295	1839	56725	46849	21477	60109	34449		2802	4105	24610	79190	92879	71160	40760	86019	37004		low	19	5	57.8
	sp|Q91WE6|CDKAL_MOUSE Threonylcarbamoyladenosine tRNA methylthiotransferase OS=Mus musculus OX=10090 GN=Cdkal1 PE=1 SV=1;sp|Q91WE6-2|CDKAL_MOUSE Isoform 2 of Threonylcarbamoyladenosine tRNA methylthiotransferase OS=Mus musculus OX=10090 GN=Cdkal1;sp|Q91WE6	Q91WE6;Q91WE6-2;Q91WE6-3;Q91WE6-4;Q91WE6-5	Threonylcarbamoyladenosine tRNA methylthiotransferase	Cdkal1	887	631	705	16724	17569	11322	8109	7450		926	1266	808	18850	12323	18249	5855	17200	17784		high	21	21	54.2
	sp|P46414|CDN1B_MOUSE Cyclin-dependent kinase inhibitor 1B OS=Mus musculus OX=10090 GN=Cdkn1b PE=1 SV=2	P46414	Cyclin-dependent kinase inhibitor 1B	Cdkn1b	124	202	653	899	697	1012	0	958		768	1077	1091	0	0	0	0	0	0		medium	4	4	23.4
	sp|Q8BI72|CARF_MOUSE CDKN2A-interacting protein OS=Mus musculus OX=10090 GN=Cdkn2aip PE=1 SV=1	Q8BI72	CDKN2A-interacting protein	Cdkn2aip	11326	13004	14190	31521	20440	20680	22819	42021		15545	19244	14664	38381	32652	31562	38265	43744	27440		high	28	28	66.1
	sp|Q9D211|C2AIL_MOUSE CDKN2AIP N-terminal-like protein OS=Mus musculus OX=10090 GN=Cdkn2aipnl PE=3 SV=1	Q9D211	CDKN2AIP N-terminal-like protein	Cdkn2aipnl	0	0	0	2900	0	1208	3034	0		274	0	346	10949	1258	2985	0	2982	0		medium	4	4	35.3
	sp|Q8R3A2|CDPF1_MOUSE Cysteine-rich DPF motif domain-containing protein 1 OS=Mus musculus OX=10090 GN=Cdpf1 PE=3 SV=2	Q8R3A2	Cysteine-rich DPF motif domain-containing protein 1	Cdpf1	0	0	0	4082	0	0	1717	0		0	0	0	5804	3381	0	3725	5093	0		low	1	1	20.2
	sp|Q99L43|CDS2_MOUSE Phosphatidate cytidylyltransferase 2 OS=Mus musculus OX=10090 GN=Cds2 PE=1 SV=1	Q99L43	Phosphatidate cytidylyltransferase 2	Cds2	11970	10688	9945	22803	24148	24812	19859	26638		13052	13618	14926	24553	25908	22288	24755	37847	24605		high	9	9	27.9
	sp|Q8R4E9|CDT1_MOUSE DNA replication factor Cdt1 OS=Mus musculus OX=10090 GN=Cdt1 PE=1 SV=1	Q8R4E9	DNA replication factor Cdt1	Cdt1	0	67	76	1984	4470	2202	2975	8583		385	439	187	848	1037	1238	618	802	0		high	18	18	45.2
	sp|Q4VAA2|CDV3_MOUSE Protein CDV3 OS=Mus musculus OX=10090 GN=Cdv3 PE=1 SV=2;sp|Q4VAA2-2|CDV3_MOUSE Isoform 2 of Protein CDV3 OS=Mus musculus OX=10090 GN=Cdv3	Q4VAA2;Q4VAA2-2	Protein CDV3	Cdv3	5776	4113	7772	977823	728490	770095	713650	693551		12401	21417	18619	1347872	1826717	1285085	1009602	1498624	1192171		high	19	19	70.5
	sp|Q9WTK2-2|CDYL_MOUSE Isoform 2 of Chromodomain Y-like protein OS=Mus musculus OX=10090 GN=Cdyl;sp|Q9WTK2|CDYL_MOUSE Chromodomain Y-like protein OS=Mus musculus OX=10090 GN=Cdyl PE=1 SV=1	Q9WTK2-2;Q9WTK2	Chromodomain Y-like protein	Cdyl	689	763	591	7457	7108	5796	3716	7961		659	982	1142	10598	9613	12319	7783	10236	8606		high	18	18	51.5
	sp|Q9D5D8|CDYL2_MOUSE Chromodomain Y-like protein 2 OS=Mus musculus OX=10090 GN=Cdyl2 PE=1 SV=1	Q9D5D8	Chromodomain Y-like protein 2	Cdyl2	650	1658	499	11055	7990	8206	7449	13530		1313	1204	870	11516	10469	8059	11551	9343	6825		high	10	10	23.3
	sp|P53568|CEBPG_MOUSE CCAAT/enhancer-binding protein gamma OS=Mus musculus OX=10090 GN=Cebpg PE=1 SV=1	P53568	CCAAT/enhancer-binding protein gamma	Cebpg	0	0	0	8049	4801	0	0	5194		0	0	0	13110	22245	7118	4686	10874	2033		low	2	2	48
	sp|P53569|CEBPZ_MOUSE CCAAT/enhancer-binding protein zeta OS=Mus musculus OX=10090 GN=Cebpz PE=1 SV=2;sp|P53569-2|CEBPZ_MOUSE Isoform CBF2 of CCAAT/enhancer-binding protein zeta OS=Mus musculus OX=10090 GN=Cebpz	P53569;P53569-2	CCAAT/enhancer-binding protein zeta	Cebpz	1824	2474	3081	73418	66328	53290	44163	44233		3129	5670	4071	80661	93951	148723	53253	61186	50349		high	47	47	49.4
	sp|Q91WM2|HDHD5_MOUSE Haloacid dehalogenase-like hydrolase domain-containing 5 OS=Mus musculus OX=10090 GN=Hdhd5 PE=1 SV=1	Q91WM2	Cat eye syndrome critical region protein 5 homolog	Cecr5	3083	6905	8181	19145	30628	28433	29914	36863		10627	9103	8357	16070	17975	23867	21260	22316	19095		high	16	16	45.3
	sp|P28659-4|CELF1_MOUSE Isoform 4 of CUGBP Elav-like family member 1 OS=Mus musculus OX=10090 GN=Celf1;sp|P28659-2|CELF1_MOUSE Isoform 2 of CUGBP Elav-like family member 1 OS=Mus musculus OX=10090 GN=Celf1;sp|P28659-3|CELF1_MOUSE Isoform 3 of CUGBP Elav-li	P28659-4;P28659-2;P28659-3;P28659	CUGBP Elav-like family member 1	Celf1	1776	4422	8120	138213	91162	95997	103712	86244		2274	9042	4150	69005	93435	92263	79943	91490	62977		high	18	14	34.1
	sp|Q9Z0H4-11|CELF2_MOUSE Isoform 11 of CUGBP Elav-like family member 2 OS=Mus musculus OX=10090 GN=Celf2;sp|Q9Z0H4-7|CELF2_MOUSE Isoform 7 of CUGBP Elav-like family member 2 OS=Mus musculus OX=10090 GN=Celf2;sp|Q9Z0H4-5|CELF2_MOUSE Isoform 5 of CUGBP Elav-	Q9Z0H4-11;Q9Z0H4-7;Q9Z0H4-5;Q9Z0H4-4;Q9Z0H4;Q9Z0H4-8;Q9Z0H4-2;Q9Z0H4-6;Q9Z0H4-9	CUGBP Elav-like family member 2	Celf2	4618	7789	13503	132581	105587	50700	102667	62801		13614	19310	15170	101196	94093	69796	62041	112664	47841		high	11	11	31.5
	sp|O35216|CENPA_MOUSE Histone H3-like centromeric protein A OS=Mus musculus OX=10090 GN=Cenpa PE=2 SV=1	O35216	Histone H3-like centromeric protein A	Cenpa	0	0	0	3453	2076	5583	4131	6750		0	0	0	5892	3520	5100	4632	6742	4917		low	2	2	13.4
	sp|P49452|CENPC_MOUSE Centromere protein C OS=Mus musculus OX=10090 GN=Cenpc PE=1 SV=2	P49452	Centromere protein C	Cenpc	1217	1069	1281	3618	5513	3372	3768	2868		382	573	1230	6280	4034	8182	8574	7384	4909		high	24	24	34.8
	sp|Q6RT24|CENPE_MOUSE Centromere-associated protein E OS=Mus musculus OX=10090 GN=Cenpe PE=1 SV=1	Q6RT24	Centromere-associated protein E	Cenpe	0	25	0	2229	657	1773	588	899		0	34	57	2901	4386	14914	4458	5637	4791		high	67	67	33.4
	tr|E9Q3P4|E9Q3P4_MOUSE Centromere protein F OS=Mus musculus OX=10090 GN=Cenpf PE=1 SV=1;tr|Q155P7|Q155P7_MOUSE LEK1 OS=Mus musculus OX=10090 GN=Cenpf PE=1 SV=1	E9Q3P4;Q155P7;E9PY14;E9Q776;F6V6F0		Cenpf	54	0	0	1023	129	527	84	252		0	0	0	1640	2137	2708	2362	3051	1393		high	37	37	15.6
	sp|Q9QYM8|CENPH_MOUSE Centromere protein H OS=Mus musculus OX=10090 GN=Cenph PE=1 SV=1	Q9QYM8	Centromere protein H	Cenph	0	0	0	0	0	176	308	1116		0	0	0	2624	3003	7982	154	2299	0		medium	5	5	26.6
	sp|Q8K1K4|CENPI_MOUSE Centromere protein I OS=Mus musculus OX=10090 GN=Cenpi PE=2 SV=1	Q8K1K4	Centromere protein I	Cenpi	0	0	0	0	321	0	0	0		0	0	0	1398	1268	0	594	1316	206		medium	5	5	10.1
	sp|Q569L8|CENPJ_MOUSE Centromere protein J OS=Mus musculus OX=10090 GN=Cenpj PE=2 SV=2	Q569L8	Centromere protein J	Cenpj	21	18	0	192	0	0	141	211		0	70	0	0	0	136	0	0	0		high	8	8	7
	sp|Q9ESN5|CENPK_MOUSE Centromere protein K OS=Mus musculus OX=10090 GN=Cenpk PE=1 SV=2;sp|Q9ESN5-2|CENPK_MOUSE Isoform 2 of Centromere protein K OS=Mus musculus OX=10090 GN=Cenpk	Q9ESN5;Q9ESN5-2;Q9ESN5-3	Centromere protein K	Cenpk	0	544	0	837	0	0	0	0		0	842	0	1844	2833	0	0	0	1726		medium	3	3	31
	sp|Q3U3S3|CENPL_MOUSE Centromere protein L OS=Mus musculus OX=10090 GN=Cenpl PE=2 SV=2	Q3U3S3	Centromere protein L	Cenpl	0	0	0	0	0	195	157	0		0	0	0	0	0	0	0	72	0		low	1	1	4
	sp|Q9CQA0|CENPM_MOUSE Centromere protein M OS=Mus musculus OX=10090 GN=Cenpm PE=2 SV=1	Q9CQA0;Q9CQA0-2	Centromere protein M	Cenpm	0	0	0	7198	1848	1162	0	1106		0	0	0	7995	7104	11441	6497	6706	4839		medium	3	3	29.4
	sp|Q8K015|CENPO_MOUSE Centromere protein O OS=Mus musculus OX=10090 GN=Cenpo PE=2 SV=1;sp|Q8K015-2|CENPO_MOUSE Isoform 2 of Centromere protein O OS=Mus musculus OX=10090 GN=Cenpo	Q8K015;Q8K015-2	Centromere protein O	Cenpo	0	0	0	1286	772	0	0	0		0	0	0	1877	1333	2160	2430	2966	0		medium	5	5	28.5
	sp|Q9CZ92|CENPP_MOUSE Centromere protein P OS=Mus musculus OX=10090 GN=Cenpp PE=2 SV=1;sp|Q9CZ92-2|CENPP_MOUSE Isoform 2 of Centromere protein P OS=Mus musculus OX=10090 GN=Cenpp	Q9CZ92;Q9CZ92-2	Centromere protein P	Cenpp	0	0	0	626	0	651	758	0		0	0	0	3177	170	2381	858	4012	1201		medium	4	4	19.2
	sp|Q9CPQ5|CENPQ_MOUSE Centromere protein Q OS=Mus musculus OX=10090 GN=Cenpq PE=2 SV=2	Q9CPQ5;Q9CPQ5-2	Centromere protein Q	Cenpq	684	387	380	7628	6265	2142	2662	2873		183	249	0	40880	8327	12967	2922	8433	2306		high	10	10	46.4
	sp|Q3TJM4|CENPT_MOUSE Centromere protein T OS=Mus musculus OX=10090 GN=Cenpt PE=2 SV=2	Q3TJM4	Centromere protein T	Cenpt	0	0	0	0	669	921	0	0		0	0	0	503	360	352	242	437	490		medium	3	3	14.2
	sp|Q8C4M7|CENPU_MOUSE Centromere protein U OS=Mus musculus OX=10090 GN=Cenpu PE=1 SV=2;sp|Q8C4M7-2|CENPU_MOUSE Isoform 2 of Centromere protein U OS=Mus musculus OX=10090 GN=Cenpu	Q8C4M7;Q8C4M7-2	Centromere protein U	Cenpu	0	0	0	355	898	1198	730	0		0	0	0	3312	671	2077	1528	3760	1237		medium	6	6	20
	sp|Q9CXS4|CENPV_MOUSE Centromere protein V OS=Mus musculus OX=10090 GN=Cenpv PE=1 SV=2	Q9CXS4;Q9CXS4-2	Centromere protein V	Cenpv	1641	1921	927	25692	6434	16573	23878	14314		16863	22862	18642	101370	100107	49474	54827	80024	26220		high	12	12	56.3
	sp|Q7TSG1|CE120_MOUSE Centrosomal protein of 120 kDa OS=Mus musculus OX=10090 GN=Cep120 PE=1 SV=1;sp|Q7TSG1-2|CE120_MOUSE Isoform 2 of Centrosomal protein of 120 kDa OS=Mus musculus OX=10090 GN=Cep120	Q7TSG1;Q7TSG1-2;Q7TSG1-3;Q7TSG1-4	Centrosomal protein of 120 kDa	Cep120	281	829	730	0	1282	1115	1031	962		244	403	771	840	474	703	931	463	302		high	28	28	36.5
	sp|Q8BI22-2|CE128_MOUSE Isoform 2 of Centrosomal protein of 128 kDa OS=Mus musculus OX=10090 GN=Cep128;sp|Q8BI22|CE128_MOUSE Centrosomal protein of 128 kDa OS=Mus musculus OX=10090 GN=Cep128 PE=1 SV=2	Q8BI22-2;Q8BI22	Centrosomal protein of 128 kDa	Cep128	234	227	305	0	223	39	250	151		246	174	270	0	154	0	140	59	0		high	20	20	23.6
	sp|Q6P5D4|CP135_MOUSE Centrosomal protein of 135 kDa OS=Mus musculus OX=10090 GN=Cep135 PE=1 SV=1	Q6P5D4	Centrosomal protein of 135 kDa	Cep135	2077	2483	1638	1970	1257	2053	1538	2816		2550	3722	3431	2352	1581	3446	2900	3111	2391		high	48	48	47.2
	sp|A2AUM9|CE152_MOUSE Centrosomal protein of 152 kDa OS=Mus musculus OX=10090 GN=Cep152 PE=1 SV=1	A2AUM9	Centrosomal protein of 152 kDa	Cep152	25	230	201	1657	888	156	534	70968		105	238	92	1026	1644	1245	378	1677	28201		high	38	38	28.9
	sp|Q5DU05-2|CE164_MOUSE Isoform 2 of Centrosomal protein of 164 kDa OS=Mus musculus OX=10090 GN=Cep164;sp|Q5DU05-3|CE164_MOUSE Isoform 3 of Centrosomal protein of 164 kDa OS=Mus musculus OX=10090 GN=Cep164;sp|Q5DU05|CE164_MOUSE Centrosomal protein of 164 k	Q5DU05-2;Q5DU05-3;Q5DU05	Centrosomal protein of 164 kDa	Cep164	35	22	27	0	0	0	0	0		0	33	49	0	338	0	832	0	0		medium	3	3	2.7
	sp|Q6A065|CE170_MOUSE Centrosomal protein of 170 kDa OS=Mus musculus OX=10090 GN=Cep170 PE=1 SV=2	Q6A065;Q6A065-2	Centrosomal protein of 170 kDa	Cep170	181	198	196	3813	4312	2885	2388	3375		374	317	82	6451	5609	5013	3738	6688	2966		medium	34	25	29.4
	sp|Q6A065-3|CE170_MOUSE Isoform 3 of Centrosomal protein of 170 kDa OS=Mus musculus OX=10090 GN=Cep170	Q6A065-3	Centrosomal protein of 170 kDa	Cep170	0	0	0	0	0	0	0	0		0	0	0	1486	1597	0	0	1579	0		low	1	1	49.2
	tr|E9Q4Y4|E9Q4Y4_MOUSE Centrosomal protein 192 OS=Mus musculus OX=10090 GN=Cep192 PE=1 SV=1	E9Q4Y4;A0A286YDK4		Cep192	701	879	777	2049	2490	2536	765	1675		668	1399	1079	1924	1793	1939	386	775	1463		high	55	55	33.1
	sp|Q60952|CP250_MOUSE Centrosome-associated protein CEP250 OS=Mus musculus OX=10090 GN=Cep250 PE=1 SV=4	Q60952	Centrosome-associated protein CEP250	Cep250	0	303	14	559	737	841	0	216		148	702	146	695	1220	2212	1576	1582	1448		high	29	29	14.5
	sp|Q6A078|CE290_MOUSE Centrosomal protein of 290 kDa OS=Mus musculus OX=10090 GN=Cep290 PE=1 SV=2	Q6A078	Centrosomal protein of 290 kDa	Cep290	0	0	0	1038	245	175	0	232		0	0	0	0	77	375	0	176	0		medium	6	6	3
	sp|Q8BQ48-6|CE295_MOUSE Isoform 6 of Centrosomal protein of 295 kDa OS=Mus musculus OX=10090 GN=Cep295;sp|Q8BQ48-5|CE295_MOUSE Isoform 5 of Centrosomal protein of 295 kDa OS=Mus musculus OX=10090 GN=Cep295;sp|Q8BQ48-3|CE295_MOUSE Isoform 3 of Centrosomal p	Q8BQ48-6;Q8BQ48-5;Q8BQ48-3;Q8BQ48-2;Q8BQ48;Q8BQ48-4	Centrosomal protein of 295 kDa	Cep295	0	37	5	0	0	63	51	127		0	0	42	0	0	58	153	68	0		medium	7	7	3.8
	sp|E9Q309|CE350_MOUSE Centrosome-associated protein 350 OS=Mus musculus OX=10090 GN=Cep350 PE=1 SV=1	E9Q309		Cep350	444	661	351	809	622	586	718	9957		631	506	477	640	1356	918	544	1857	515		high	64	64	27.6
	sp|Q99NF3|CEP41_MOUSE Centrosomal protein of 41 kDa OS=Mus musculus OX=10090 GN=Cep41 PE=1 SV=1	Q99NF3;Q99NF3-2	Centrosomal protein of 41 kDa	Cep41	0	282	591	4705	8382	4682	4143	5417		979	1114	397	4640	5486	6244	5056	3888	6598		high	13	13	50.1
	sp|Q5HZK1|CEP44_MOUSE Centrosomal protein of 44 kDa OS=Mus musculus OX=10090 GN=Cep44 PE=2 SV=1	Q5HZK1	Centrosomal protein of 44 kDa	Cep44	0	0	0	2490	764	1093	962	2611		0	0	0	610	1201	858	1892	0	1436		medium	7	7	31.6
	sp|Q8BT07|CEP55_MOUSE Centrosomal protein of 55 kDa OS=Mus musculus OX=10090 GN=Cep55 PE=1 SV=2;sp|Q8BT07-2|CEP55_MOUSE Isoform 2 of Centrosomal protein of 55 kDa OS=Mus musculus OX=10090 GN=Cep55	Q8BT07;Q8BT07-2	Centrosomal protein of 55 kDa	Cep55	0	0	0	10693	90835	11078	2874	9739		0	0	0	37017	30105	42307	28900	120932	29434		high	21	21	43.1
	sp|Q8CEE0|CEP57_MOUSE Centrosomal protein of 57 kDa OS=Mus musculus OX=10090 GN=Cep57 PE=1 SV=2;sp|Q8CEE0-2|CEP57_MOUSE Isoform 2 of Centrosomal protein of 57 kDa OS=Mus musculus OX=10090 GN=Cep57;sp|Q8CEE0-3|CEP57_MOUSE Isoform 3 of Centrosomal protein of	Q8CEE0;Q8CEE0-2;Q8CEE0-3	Centrosomal protein of 57 kDa	Cep57	1869	4104	2811	11922	4939	6605	6484	8454		1627	3144	2153	8056	8650	11806	8641	11759	6362		high	21	21	41.4
	sp|Q8VDS7-2|CE57L_MOUSE Isoform 3 of Centrosomal protein CEP57L1 OS=Mus musculus OX=10090 GN=Cep57l1;sp|Q8VDS7-1|CE57L_MOUSE Isoform 2 of Centrosomal protein CEP57L1 OS=Mus musculus OX=10090 GN=Cep57l1;sp|Q8VDS7|CE57L_MOUSE Centrosomal protein CEP57L1 OS=M	Q8VDS7-2;Q8VDS7-1;Q8VDS7	Centrosomal protein CEP57L1	Cep57l1	0	0	0	0	0	553	0	0		0	0	0	0	0	0	346	0	597		low	2	2	7.8
	sp|Q3UPP8|CEP63_MOUSE Centrosomal protein of 63 kDa OS=Mus musculus OX=10090 GN=Cep63 PE=1 SV=2;sp|Q3UPP8-2|CEP63_MOUSE Isoform 2 of Centrosomal protein of 63 kDa OS=Mus musculus OX=10090 GN=Cep63	Q3UPP8;Q3UPP8-2	Centrosomal protein of 63 kDa	Cep63	23	97	0	4364	471	1398	462	331		238	126	22	1685	1666	2452	969	2270	511		low	16	2	31.4
	sp|Q8C0D9|CEP68_MOUSE Centrosomal protein of 68 kDa OS=Mus musculus OX=10090 GN=Cep68 PE=1 SV=2;sp|Q8C0D9-2|CEP68_MOUSE Isoform 2 of Centrosomal protein of 68 kDa OS=Mus musculus OX=10090 GN=Cep68	Q8C0D9;Q8C0D9-2	Centrosomal protein of 68 kDa	Cep68	0	102	97	629	0	0	0	0		23	142	31	383	783	570	402	586	323		medium	4	4	8.9
	sp|Q9D3R3-2|CEP72_MOUSE Isoform 2 of Centrosomal protein of 72 kDa OS=Mus musculus OX=10090 GN=Cep72;sp|Q9D3R3|CEP72_MOUSE Centrosomal protein of 72 kDa OS=Mus musculus OX=10090 GN=Cep72 PE=1 SV=3	Q9D3R3-2;Q9D3R3	Centrosomal protein of 72 kDa	Cep72	0	0	0	0	0	0	383	0		162	0	0	0	0	3012	438	803	0		medium	3	3	15
	sp|Q0VEJ0|CEP76_MOUSE Centrosomal protein of 76 kDa OS=Mus musculus OX=10090 GN=Cep76 PE=1 SV=1	Q0VEJ0	Centrosomal protein of 76 kDa	Cep76	0	207	0	850	952	945	324	405		178	64	224	2076	2413	3146	989	2027	1559		high	12	12	26.9
	sp|Q6IRU7|CEP78_MOUSE Centrosomal protein of 78 kDa OS=Mus musculus OX=10090 GN=Cep78 PE=2 SV=1	Q6IRU7	Centrosomal protein of 78 kDa	Cep78	64	0	0	1014	643	1096	623	356		131	88	68	1915	2622	1728	1592	901	570		medium	7	7	14.9
	sp|Q9D5R3|CEP83_MOUSE Centrosomal protein of 83 kDa OS=Mus musculus OX=10090 GN=Cep83 PE=1 SV=2	Q9D5R3;Q9D5R3-2	Centrosomal protein of 83 kDa	Cep83	0	0	0	499	1107	402	0	319		0	0	0	1252	1833	3304	1181	1216	2027		high	11	11	21.5
	sp|Q8BMK0|CEP85_MOUSE Centrosomal protein of 85 kDa OS=Mus musculus OX=10090 GN=Cep85 PE=1 SV=2	Q8BMK0	Centrosomal protein of 85 kDa	Cep85	131	0	0	2282	182	2541	1004	290		0	0	84	1988	4482	5057	5716	3592	2676		high	11	11	21.2
	sp|Q8BVV7|CEP95_MOUSE Centrosomal protein of 95 kDa OS=Mus musculus OX=10090 GN=Cep95 PE=1 SV=2	Q8BVV7	Centrosomal protein of 95 kDa	Cep95	155	464	242	2528	1919	347	384	1838		195	397	222	425	0	81	689	0	336		high	8	8	12
	sp|Q9CZ62|CEP97_MOUSE Centrosomal protein of 97 kDa OS=Mus musculus OX=10090 GN=Cep97 PE=1 SV=1;sp|Q9CZ62-2|CEP97_MOUSE Isoform 2 of Centrosomal protein of 97 kDa OS=Mus musculus OX=10090 GN=Cep97	Q9CZ62;Q9CZ62-2	Centrosomal protein of 97 kDa	Cep97	826	1472	1452	5175	2488	2256	1717	1808		771	1201	717	10852	2960	1855	3131	3570	1290		high	20	20	40.2
	sp|Q8BGS7-2|CEPT1_MOUSE Isoform 2 of Choline/ethanolaminephosphotransferase 1 OS=Mus musculus OX=10090 GN=Cept1;sp|Q8BGS7|CEPT1_MOUSE Choline/ethanolaminephosphotransferase 1 OS=Mus musculus OX=10090 GN=Cept1 PE=1 SV=1	Q8BGS7-2;Q8BGS7	Choline/ethanolaminephosphotransferase 1	Cept1	1892	1547	2001	26695	15818	10985	25041	9597		3082	1927	1450	17554	26540	13433	9109	16626	4223		medium	5	5	14.7
	sp|Q924Z4|CERS2_MOUSE Ceramide synthase 2 OS=Mus musculus OX=10090 GN=Cers2 PE=1 SV=1	Q924Z4	Ceramide synthase 2	Cers2	5005	4736	3879	15933	50827	35296	24050	37065		7214	6351	7536	55177	57960	73599	48602	56171	22968		high	10	10	25
	sp|Q9D6K9-2|CERS5_MOUSE Isoform 2 of Ceramide synthase 5 OS=Mus musculus OX=10090 GN=Cers5;sp|Q9D6K9|CERS5_MOUSE Ceramide synthase 5 OS=Mus musculus OX=10090 GN=Cers5 PE=1 SV=1	Q9D6K9-2;Q9D6K9	Ceramide synthase 5	Cers5	0	720	405	7959	7051	5702	1404	8223		556	422	481	7587	8317	6036	5856	3598	5749		medium	5	5	16.3
	sp|Q8C172|CERS6_MOUSE Ceramide synthase 6 OS=Mus musculus OX=10090 GN=Cers6 PE=1 SV=1	Q8C172	Ceramide synthase 6	Cers6	0	1086	695	1614	948	941	873	479		0	0	0	1107	2008	1083	1122	0	1242		medium	3	3	14.1
	sp|Q9R1K9|CETN2_MOUSE Centrin-2 OS=Mus musculus OX=10090 GN=Cetn2 PE=1 SV=1	Q9R1K9;P41209	Centrin-2	Cetn2	4738	2080	1650	71302	45162	24827	28398	54670		9195	4988	8209	95845	135783	58478	47771	71236	53161		high	9	9	61
	sp|O35648|CETN3_MOUSE Centrin-3 OS=Mus musculus OX=10090 GN=Cetn3 PE=1 SV=1	O35648	Centrin-3	Cetn3	6728	5483	5131	68530	16507	45070	36778	53912		7315	6393	6807	89359	99127	117614	81427	44464	87747		high	11	11	43.1
	sp|Q8BTU1|CFA20_MOUSE Cilia- and flagella-associated protein 20 OS=Mus musculus OX=10090 GN=Cfap20 PE=1 SV=1;sp|Q8BTU1-2|CFA20_MOUSE Isoform 2 of Cilia- and flagella-associated protein 20 OS=Mus musculus OX=10090 GN=Cfap20	Q8BTU1;Q8BTU1-2	Cilia- and flagella-associated protein 20	Cfap20	6737	7566	7810	70021	71391	45045	16821	48751		7496	10029	10091	46270	52730	45138	30700	37544	42739		high	11	11	59.1
	sp|Q8C6E0|CFA36_MOUSE Cilia- and flagella-associated protein 36 OS=Mus musculus OX=10090 GN=Cfap36 PE=1 SV=1	Q8C6E0	Cilia- and flagella-associated protein 36	Cfap36	0	0	0	3410	1058	3058	1853	1667		0	0	0	859	977	3395	1632	3346	1903		high	8	8	40.5
	sp|Q6ZPR1|CFA97_MOUSE Cilia- and flagella-associated protein 97 OS=Mus musculus OX=10090 GN=Cfap97 PE=1 SV=2	Q6ZPR1	Cilia- and flagella-associated protein 97	Cfap97	0	0	0	733	381	0	468	0		0	0	0	634	1220	2224	1394	636	0		medium	6	6	12.4
	sp|O88271|CFDP1_MOUSE Craniofacial development protein 1 OS=Mus musculus OX=10090 GN=Cfdp1 PE=1 SV=1	O88271	Craniofacial development protein 1	Cfdp1	15470	13357	11196	178598	171151	144915	110620	170432		13522	14768	19386	222478	211180	216725	133399	225904	159084		high	16	16	48.8
	sp|P18760|COF1_MOUSE Cofilin-1 OS=Mus musculus OX=10090 GN=Cfl1 PE=1 SV=3	P18760	Cofilin-1	Cfl1	2592874	2902895	3733333	18723311	20249223	15113967	13427356	17071942		3327076	4862595	4677685	14192242	12237005	23058169	8872322	14306228	8798782		high	32	27	97
	sp|P45591|COF2_MOUSE Cofilin-2 OS=Mus musculus OX=10090 GN=Cfl2 PE=1 SV=1	P45591	Cofilin-2	Cfl2	1151	2104	2141	8122	3914	2747	8766	6288		1469	2251	1864	7431	7824	6160	3606	3884	4630		medium	6	6	67.5
	sp|Q8BHG9|CGBP1_MOUSE CGG triplet repeat-binding protein 1 OS=Mus musculus OX=10090 GN=Cggbp1 PE=1 SV=1	Q8BHG9	CGG triplet repeat-binding protein 1	Cggbp1	9269	5600	11271	123173	89124	70918	53828	132657		12609	15954	14964	94499	93925	59169	113738	137352	96805		high	14	14	77.8
	sp|Q9CQG1|CHAC2_MOUSE Putative glutathione-specific gamma-glutamylcyclotransferase 2 OS=Mus musculus OX=10090 GN=Chac2 PE=1 SV=1;sp|Q9CQG1-2|CHAC2_MOUSE Isoform 2 of Putative glutathione-specific gamma-glutamylcyclotransferase 2 OS=Mus musculus OX=10090 GN	Q9CQG1;Q9CQG1-2	Putative glutathione-specific gamma-glutamylcyclotransferase 2	Chac2	0	0	0	1735	0	0	1117	0		0	0	0	2118	2524	3602	0	1048	0		low	2	2	15.7
	sp|Q9QWF0|CAF1A_MOUSE Chromatin assembly factor 1 subunit A OS=Mus musculus OX=10090 GN=Chaf1a PE=1 SV=1	Q9QWF0	Chromatin assembly factor 1 subunit A	Chaf1a	0	0	0	26340	10201	13257	10567	12343		0	0	0	26130	31739	22228	22818	21681	16178		high	29	29	46.9
	sp|Q9D0N7|CAF1B_MOUSE Chromatin assembly factor 1 subunit B OS=Mus musculus OX=10090 GN=Chaf1b PE=1 SV=1	Q9D0N7	Chromatin assembly factor 1 subunit B	Chaf1b	0	0	0	49133	38630	39211	22992	22922		0	0	0	54393	79836	73960	52849	38879	45753		high	22	22	52.6
	sp|Q8K327|CHAP1_MOUSE Chromosome alignment-maintaining phosphoprotein 1 OS=Mus musculus OX=10090 GN=Champ1 PE=1 SV=1	Q8K327	Chromosome alignment-maintaining phosphoprotein 1	Champ1	2585	2918	2525	42257	27051	24444	25999	24529		1007	1919	3858	21305	19045	25959	20228	26045	29952		high	46	46	70.8
	sp|Q9CQA6|CHCH1_MOUSE Coiled-coil-helix-coiled-coil-helix domain-containing protein 1 OS=Mus musculus OX=10090 GN=Chchd1 PE=1 SV=1	Q9CQA6	Coiled-coil-helix-coiled-coil-helix domain-containing protein 1	Chchd1	0	0	0	172042	0	0	0	0		0	0	855	88446	7119	5782	12595	11893	0		medium	4	4	38.1
	sp|Q9CRB9|MIC19_MOUSE MICOS complex subunit Mic19 OS=Mus musculus OX=10090 GN=Chchd3 PE=1 SV=1	Q9CRB9	MICOS complex subunit Mic19	Chchd3	42112	33013	30971	406255	347934	267779	223285	262993		49951	53442	57528	401456	378450	451525	244976	375183	298758		high	13	13	54.6
	sp|Q8VEA4|MIA40_MOUSE Mitochondrial intermembrane space import and assembly protein 40 OS=Mus musculus OX=10090 GN=Chchd4 PE=1 SV=1	Q8VEA4	Mitochondrial intermembrane space import and assembly protein 40	Chchd4	0	0	671	27404	23287	17889	13153	11500		0	1757	2107	58616	81301	31094	31997	40804	35760		medium	3	3	36.7
	sp|Q91VN4|MIC25_MOUSE MICOS complex subunit Mic25 OS=Mus musculus OX=10090 GN=Chchd6 PE=1 SV=2	Q91VN4	MICOS complex subunit Mic25	Chchd6	0	0	0	12538	8890	4292	4503	2935		0	0	0	12515	10709	4386	7945	10887	6566		medium	5	5	23.8
	sp|P40201|CHD1_MOUSE Chromodomain-helicase-DNA-binding protein 1 OS=Mus musculus OX=10090 GN=Chd1 PE=1 SV=3	P40201	Chromodomain-helicase-DNA-binding protein 1	Chd1	1501	1537	1142	29602	19868	19881	16900	18618		2477	1630	2266	33519	24943	22167	26809	32409	23576		high	62	54	41.9
	sp|Q9CXF7|CHD1L_MOUSE Chromodomain-helicase-DNA-binding protein 1-like OS=Mus musculus OX=10090 GN=Chd1l PE=1 SV=1;sp|Q9CXF7-2|CHD1L_MOUSE Isoform 2 of Chromodomain-helicase-DNA-binding protein 1-like OS=Mus musculus OX=10090 GN=Chd1l	Q9CXF7;Q9CXF7-2	Chromodomain-helicase-DNA-binding protein 1-like	Chd1l	2585	4200	3731	19705	12655	11794	9708	13919		3809	4012	4498	26111	26655	45246	28381	31740	16871		high	41	41	47.7
	sp|E9PZM4|CHD2_MOUSE Chromodomain-helicase-DNA-binding protein 2 OS=Mus musculus OX=10090 GN=Chd2 PE=1 SV=1	E9PZM4	Chromodomain-helicase-DNA-binding protein 2	Chd2	10481	132736	216405	3000	2423	1608	2258	2416		85881	174121	3609	3821	4782	4498	3762	3977	2045		high	42	42	33.3
	tr|B1AR17|B1AR17_MOUSE Chromodomain helicase DNA-binding protein 3 OS=Mus musculus OX=10090 GN=Chd3 PE=1 SV=1;tr|E9Q614|E9Q614_MOUSE Chromodomain helicase DNA-binding protein 3 OS=Mus musculus OX=10090 GN=Chd3 PE=1 SV=1;tr|F7C528|F7C528_MOUSE Chromodomain	B1AR17;E9Q614;F7C528;F6V4V3;B0QZH8;B0QZH7		Chd3	1936	3089	2808	3261	4543	6358	4581	4494		1509	3029	3176	4380	2476	2646	4898	2973	1655		high	51	43	40.7
	sp|Q6PDQ2|CHD4_MOUSE Chromodomain-helicase-DNA-binding protein 4 OS=Mus musculus OX=10090 GN=Chd4 PE=1 SV=1	Q6PDQ2	Chromodomain-helicase-DNA-binding protein 4	Chd4	19067	23542	21653	254360	185561	159948	174102	154251		25974	36200	36472	252706	250827	240754	190462	221603	178003		high	116	88	64.9
	sp|A2AJK6|CHD7_MOUSE Chromodomain-helicase-DNA-binding protein 7 OS=Mus musculus OX=10090 GN=Chd7 PE=1 SV=1;sp|A2AJK6-3|CHD7_MOUSE Isoform 3 of Chromodomain-helicase-DNA-binding protein 7 OS=Mus musculus OX=10090 GN=Chd7	A2AJK6;A2AJK6-3;A2AJK6-2	Chromodomain-helicase-DNA-binding protein 7	Chd7	27	52	45	1909	10025	390	630	505		0	0	57	2120	48536	2256	1068	1648	896		high	37	34	23
	sp|Q09XV5|CHD8_MOUSE Chromodomain-helicase-DNA-binding protein 8 OS=Mus musculus OX=10090 GN=Chd8 PE=1 SV=1	Q09XV5;Q09XV5-2	Chromodomain-helicase-DNA-binding protein 8	Chd8	1236	2127	1685	14014	9006	8573	9145	11393		1697	2791	2669	11179	10781	18608	8920	12235	10248		high	77	64	38.8
	sp|Q8BYH8-2|CHD9_MOUSE Isoform 2 of Chromodomain-helicase-DNA-binding protein 9 OS=Mus musculus OX=10090 GN=Chd9;sp|Q8BYH8|CHD9_MOUSE Chromodomain-helicase-DNA-binding protein 9 OS=Mus musculus OX=10090 GN=Chd9 PE=1 SV=2	Q8BYH8-2;Q8BYH8	Chromodomain-helicase-DNA-binding protein 9	Chd9	15	11	0	0	0	0	0	74		0	0	0	131	183	78	0	0	0		medium	5	5	6.6
	sp|Q8BJ64|CHDH_MOUSE Choline dehydrogenase, mitochondrial OS=Mus musculus OX=10090 GN=Chdh PE=1 SV=1	Q8BJ64	Choline dehydrogenase, mitochondrial	Chdh	3969	4117	4508	1099	2749	788	1853	4269		86	0	0	0	0	0	0	0	0		high	14	14	34.6
	sp|O35280|CHK1_MOUSE Serine/threonine-protein kinase Chk1 OS=Mus musculus OX=10090 GN=Chek1 PE=1 SV=2	O35280	Serine/threonine-protein kinase Chk1	Chek1	0	0	0	78227	58614	48849	35983	38187		0	0	0	74693	54720	66128	65939	75997	55408		low	24	4	49.4
	sp|Q8CGZ0|CHERP_MOUSE Calcium homeostasis endoplasmic reticulum protein OS=Mus musculus OX=10090 GN=Cherp PE=1 SV=1	Q8CGZ0	Calcium homeostasis endoplasmic reticulum protein	Cherp	8110	10261	8868	90803	46676	47586	36951	54084		8331	12510	10961	63386	71053	69313	62046	69360	60485		high	30	30	33.9
	sp|Q810L3-4|CHFR_MOUSE Isoform 4 of E3 ubiquitin-protein ligase CHFR OS=Mus musculus OX=10090 GN=Chfr;sp|Q810L3-3|CHFR_MOUSE Isoform 3 of E3 ubiquitin-protein ligase CHFR OS=Mus musculus OX=10090 GN=Chfr;sp|Q810L3-2|CHFR_MOUSE Isoform 2 of E3 ubiquitin-pro	Q810L3-4;Q810L3-3;Q810L3-2;Q810L3	E3 ubiquitin-protein ligase CHFR	Chfr	149	202	54	177	0	174	0	0		323	89	208	753	448	1058	228	419	644		medium	6	6	14.1
	sp|Q922Q9|CHID1_MOUSE Chitinase domain-containing protein 1 OS=Mus musculus OX=10090 GN=Chid1 PE=1 SV=1;sp|Q922Q9-2|CHID1_MOUSE Isoform 2 of Chitinase domain-containing protein 1 OS=Mus musculus OX=10090 GN=Chid1	Q922Q9;Q922Q9-2	Chitinase domain-containing protein 1	Chid1	1391	1239	1002	3832	1379	4828	2041	3183		959	1060	642	4215	2890	3379	3184	2474	3898		high	9	9	27.5
	sp|O54804-2|CHKA_MOUSE Isoform 2 of Choline kinase alpha OS=Mus musculus OX=10090 GN=Chka;sp|O54804|CHKA_MOUSE Choline kinase alpha OS=Mus musculus OX=10090 GN=Chka PE=1 SV=3	O54804-2;O54804	Choline kinase alpha	Chka	0	0	0	635	0	1008	0	0		0	0	0	2065	997	1695	1214	744	710		medium	4	4	18.4
	sp|O55229|CHKB_MOUSE Choline/ethanolamine kinase OS=Mus musculus OX=10090 GN=Chkb PE=1 SV=3	O55229	Choline/ethanolamine kinase	Chkb	1297	615	890	2957	0	0	2967	1124		1210	596	2001	1764	5187	2465	1825	2184	0		high	9	9	26.1
	sp|Q9QXG2|RAE1_MOUSE Rab proteins geranylgeranyltransferase component A 1 OS=Mus musculus OX=10090 GN=Chm PE=1 SV=1	Q9QXG2	Rab proteins geranylgeranyltransferase component A 1	Chm	885	2260	1659	11489	12892	5516	9620	10162		1684	2980	2576	17868	14381	11419	9990	22603	12639		high	18	18	43
	sp|Q921W0|CHM1A_MOUSE Charged multivesicular body protein 1a OS=Mus musculus OX=10090 GN=Chmp1a PE=1 SV=1	Q921W0	Charged multivesicular body protein 1a	Chmp1a	4826	2984	1978	49383	21530	21837	34247	34515		6392	3374	7441	27393	29784	7986	47504	36678	16797		high	8	8	22.4
	sp|Q99LU0|CH1B1_MOUSE Charged multivesicular body protein 1b-1 OS=Mus musculus OX=10090 GN=Chmp1b1 PE=1 SV=1	Q99LU0	Charged multivesicular body protein 1b-1	Chmp1b1	17959	10615	12191	62080	51435	49268	8678	43134		16169	19176	28596	13194	17960	14224	36491	39608	36318		low	8	3	30.2
	sp|Q9DB34|CHM2A_MOUSE Charged multivesicular body protein 2a OS=Mus musculus OX=10090 GN=Chmp2a PE=1 SV=1	Q9DB34	Charged multivesicular body protein 2a	Chmp2a	4617	6303	2759	51419	61609	59693	106295	53033		2920	6334	5585	36320	42695	28359	75601	66193	41543		high	10	10	38.3
	sp|Q8BJF9|CHM2B_MOUSE Charged multivesicular body protein 2b OS=Mus musculus OX=10090 GN=Chmp2b PE=1 SV=1	Q8BJF9	Charged multivesicular body protein 2b	Chmp2b	8391	3981	7471	15510	55884	19323	79310	78924		4451	5150	10872	23417	23135	19565	34075	28902	24503		medium	7	7	31.9
	sp|Q9CQ10|CHMP3_MOUSE Charged multivesicular body protein 3 OS=Mus musculus OX=10090 GN=Chmp3 PE=1 SV=3	Q9CQ10	Charged multivesicular body protein 3	Chmp3	5075	7060	11519	14251	9976	12737	4048	3209		7214	10573	14582	22090	24783	16227	6271	21124	15589		high	11	11	48.7
	sp|Q9D8B3|CHM4B_MOUSE Charged multivesicular body protein 4b OS=Mus musculus OX=10090 GN=Chmp4b PE=1 SV=2	Q9D8B3	Charged multivesicular body protein 4b	Chmp4b	7271	6585	8447	169435	124080	116051	108767	153254		16343	18427	22420	463741	155041	155124	107298	187963	63658		high	16	14	63.4
	sp|Q9D7S9|CHMP5_MOUSE Charged multivesicular body protein 5 OS=Mus musculus OX=10090 GN=Chmp5 PE=1 SV=1	Q9D7S9	Charged multivesicular body protein 5	Chmp5	498	1123	1865	8856	12838	12296	29831	19493		814	2730	3106	11058	12965	15218	10224	17050	9646		medium	5	5	33.8
	sp|P0C0A3|CHMP6_MOUSE Charged multivesicular body protein 6 OS=Mus musculus OX=10090 GN=Chmp6 PE=1 SV=2	P0C0A3	Charged multivesicular body protein 6	Chmp6	1957	195	212	10514	13200	5865	11234	14142		0	632	486	23193	22013	13421	25271	24921	8872		medium	6	6	35
	sp|Q8R1T1|CHMP7_MOUSE Charged multivesicular body protein 7 OS=Mus musculus OX=10090 GN=Chmp7 PE=1 SV=1;sp|Q8R1T1-2|CHMP7_MOUSE Isoform 2 of Charged multivesicular body protein 7 OS=Mus musculus OX=10090 GN=Chmp7	Q8R1T1;Q8R1T1-2	Charged multivesicular body protein 7	Chmp7	249	205	290	5122	2167	2755	3116	7706		348	277	384	3894	6376	5669	1803	9632	5922		high	12	12	36.6
	sp|Q80XD1-3|CHIO_MOUSE Isoform 3 of Beta-chimaerin OS=Mus musculus OX=10090 GN=Chn2;sp|Q80XD1-2|CHIO_MOUSE Isoform 2 of Beta-chimaerin OS=Mus musculus OX=10090 GN=Chn2;sp|Q80XD1|CHIO_MOUSE Beta-chimaerin OS=Mus musculus OX=10090 GN=Chn2 PE=1 SV=2	Q80XD1-3;Q80XD1-2;Q80XD1	Beta-chimaerin	Chn2	231	157	0	724	1573	1024	0	1219		0	0	0	0	0	0	0	0	0		medium	3	3	15.2
	sp|Q9D1P4|CHRD1_MOUSE Cysteine and histidine-rich domain-containing protein 1 OS=Mus musculus OX=10090 GN=Chordc1 PE=1 SV=1	Q9D1P4	Cysteine and histidine-rich domain-containing protein 1	Chordc1	43895	40896	41331	729690	613378	462150	447155	414186		62123	71490	74864	657993	466650	615620	462157	636132	469151		high	23	23	73.4
	sp|P61022|CHP1_MOUSE Calcineurin B homologous protein 1 OS=Mus musculus OX=10090 GN=Chp1 PE=1 SV=2	P61022	Calcineurin B homologous protein 1	Chp1	342	0	431	28757	35617	22408	9971	36324		1843	2485	2925	45109	42301	58751	16833	23498	41817		high	12	12	67.7
	sp|Q6IQX7|CHSS2_MOUSE Chondroitin sulfate synthase 2 OS=Mus musculus OX=10090 GN=Chpf PE=1 SV=1;sp|Q6IQX7-3|CHSS2_MOUSE Isoform 3 of Chondroitin sulfate synthase 2 OS=Mus musculus OX=10090 GN=Chpf;sp|Q6IQX7-2|CHSS2_MOUSE Isoform 2 of Chondroitin sulfate sy	Q6IQX7;Q6IQX7-3;Q6IQX7-2	Chondroitin sulfate synthase 2	Chpf	0	0	0	262	207	0	0	0		0	0	0	226	270	436	820	726	375		medium	4	4	6.5
	tr|Q3UU43|Q3UU43_MOUSE Hexosyltransferase OS=Mus musculus OX=10090 GN=Chpf2 PE=1 SV=1	Q3UU43		Chpf2	0	0	0	87628	0	219	205	70806		0	0	0	0	0	573	0	1223	596		medium	5	5	9.2
	sp|Q6ZQ11|CHSS1_MOUSE Chondroitin sulfate synthase 1 OS=Mus musculus OX=10090 GN=Chsy1 PE=2 SV=2	Q6ZQ11	Chondroitin sulfate synthase 1	Chsy1	0	0	0	0	0	0	98	5782		0	0	237	998	753	1303	6544	2905	0		medium	7	7	13.8
	sp|Q8BIW9|CTF18_MOUSE Chromosome transmission fidelity protein 18 homolog OS=Mus musculus OX=10090 GN=Chtf18 PE=1 SV=2	Q8BIW9	Chromosome transmission fidelity protein 18 homolog	Chtf18	0	0	0	6770	4698	4021	1247	795		0	0	0	11701	3634	12643	6147	12549	9359		high	23	23	32.2
	sp|P0CG15|CTF8_MOUSE Chromosome transmission fidelity protein 8 homolog OS=Mus musculus OX=10090 GN=Chtf8 PE=3 SV=1	P0CG15	Chromosome transmission fidelity protein 8 homolog	Chtf8	0	0	0	0	0	0	0	0		0	0	0	3460	0	4954	0	0	0		low	2	2	16.5
	sp|Q9CY57-3|CHTOP_MOUSE Isoform 3 of Chromatin target of PRMT1 protein OS=Mus musculus OX=10090 GN=Chtop;sp|Q9CY57|CHTOP_MOUSE Chromatin target of PRMT1 protein OS=Mus musculus OX=10090 GN=Chtop PE=1 SV=2;sp|Q9CY57-5|CHTOP_MOUSE Isoform 5 of Chromatin targ	Q9CY57-3;Q9CY57;Q9CY57-5;Q9CY57-4;Q9CY57-2	Chromatin target of PRMT1 protein	Chtop	3491	2703	8284	311259	153095	89708	211685	277317		12293	13745	17018	340730	387075	136180	255675	402403	125891		high	12	12	53
	sp|Q60680|IKKA_MOUSE Inhibitor of nuclear factor kappa-B kinase subunit alpha OS=Mus musculus OX=10090 GN=Chuk PE=1 SV=1;sp|Q60680-3|IKKA_MOUSE Isoform 3 of Inhibitor of nuclear factor kappa-B kinase subunit alpha OS=Mus musculus OX=10090 GN=Chuk;sp|Q60680	Q60680;Q60680-3;Q60680-2	Inhibitor of nuclear factor kappa-B kinase subunit alpha	Chuk	507	856	882	10019	9915	6888	7857	5665		1164	658	1131	11398	12577	8009	5999	9879	8339		high	27	27	42.4
	sp|Q6DG52|CHUR_MOUSE Protein Churchill OS=Mus musculus OX=10090 GN=Churc1 PE=3 SV=1;sp|Q6DG52-2|CHUR_MOUSE Isoform 2 of Protein Churchill OS=Mus musculus OX=10090 GN=Churc1	Q6DG52;Q6DG52-2	Protein Churchill	Churc1	1135	1378	1708	86983	63905	55072	34831	41765		0	5106	2356	74961	54852	45540	48124	51187	63623		medium	6	6	62.5
	sp|Q99KN2|CIAO1_MOUSE Probable cytosolic iron-sulfur protein assembly protein CIAO1 OS=Mus musculus OX=10090 GN=Ciao1 PE=1 SV=1	Q99KN2	Probable cytosolic iron-sulfur protein assembly protein CIAO1	Ciao1	5067	7053	3861	34918	29968	23032	25350	37550		3422	5438	12286	34781	38069	73453	25547	38537	36703		high	15	15	71.4
	sp|Q8WTY4|CPIN1_MOUSE Anamorsin OS=Mus musculus OX=10090 GN=Ciapin1 PE=1 SV=1	Q8WTY4	Anamorsin	Ciapin1	568	799	1724	121649	26462	32591	36544	25205		2353	4423	3277	115872	93214	116802	176882	93346	34122		high	17	17	72.8
	sp|Q9Z0F4|CIB1_MOUSE Calcium and integrin-binding protein 1 OS=Mus musculus OX=10090 GN=Cib1 PE=1 SV=3	Q9Z0F4	Calcium and integrin-binding protein 1	Cib1	221	157	410	2149	4989	4382	2133	2100		0	400	403	1673	345	0	4121	4376	322		medium	5	5	38.7
	sp|Q924A2|CIC_MOUSE Protein capicua homolog OS=Mus musculus OX=10090 GN=Cic PE=1 SV=2;sp|Q924A2-2|CIC_MOUSE Isoform 2 of Protein capicua homolog OS=Mus musculus OX=10090 GN=Cic	Q924A2;Q924A2-2	Protein capicua homolog	Cic	170	243	251	820	524	634	559	554		296	351	294	876	1457	632	463	692	222		high	25	25	22.8
	sp|Q9DA19|CIR1_MOUSE Corepressor interacting with RBPJ 1 OS=Mus musculus OX=10090 GN=Cir1 PE=1 SV=2;sp|Q9DA19-3|CIR1_MOUSE Isoform 2 of Corepressor interacting with RBPJ 1 OS=Mus musculus OX=10090 GN=Cir1	Q9DA19;Q9DA19-3	Corepressor interacting with RBPJ 1	Cir1	388	391	638	1744	1965	1945	4160	1770		774	673	1220	3383	0	1316	6798	0	2158		high	8	8	19.1
	sp|P60824|CIRBP_MOUSE Cold-inducible RNA-binding protein OS=Mus musculus OX=10090 GN=Cirbp PE=1 SV=1	P60824	Cold-inducible RNA-binding protein	Cirbp	42062	38843	32956	104242	91211	53641	80138	96450		41569	50340	47379	72674	55684	50298	48702	59476	49759		medium	7	7	43.6
	sp|Q8R2N2|UTP4_MOUSE U3 small nucleolar RNA-associated protein 4 homolog OS=Mus musculus OX=10090 GN=Utp4 PE=2 SV=3	Q8R2N2	Cirhin	Cirh1a	5295	3137	5897	134258	106113	78116	65287	66240		8997	9410	11949	149563	156772	156559	87430	129146	116580		high	31	31	59.9
	sp|Q91WS0|CISD1_MOUSE CDGSH iron-sulfur domain-containing protein 1 OS=Mus musculus OX=10090 GN=Cisd1 PE=1 SV=1	Q91WS0	CDGSH iron-sulfur domain-containing protein 1	Cisd1	578	654	0	103518	43777	17344	31207	41537		0	2149	3502	203030	89141	128187	51779	77962	37239		medium	5	5	44.4
	sp|Q9CQB5|CISD2_MOUSE CDGSH iron-sulfur domain-containing protein 2 OS=Mus musculus OX=10090 GN=Cisd2 PE=1 SV=1	Q9CQB5	CDGSH iron-sulfur domain-containing protein 2	Cisd2	4987	11140	17098	213337	138914	102830	115768	144547		10430	20449	15512	198459	183312	238621	132876	201456	99898		high	9	9	63.7
	sp|B1AR13|CISD3_MOUSE CDGSH iron-sulfur domain-containing protein 3, mitochondrial OS=Mus musculus OX=10090 GN=Cisd3 PE=1 SV=1	B1AR13	CDGSH iron-sulfur domain-containing protein 3, mitochondrial	Cisd3	0	1542	926	4101	2806	1980	1156	0		349	1234	1887	2727	8069	2011	0	965	0		medium	3	3	17.5
	sp|Q62225|CISH_MOUSE Cytokine-inducible SH2-containing protein OS=Mus musculus OX=10090 GN=Cish PE=1 SV=1	Q62225	Cytokine-inducible SH2-containing protein	Cish	0	0	0	0	7148	6334	9504	5728		0	0	0	0	3670	3321	5374	4643	4213		medium	6	6	42
	sp|P49025-5|CTRO_MOUSE Isoform 5 of Citron Rho-interacting kinase OS=Mus musculus OX=10090 GN=Cit	P49025-5	Citron Rho-interacting kinase	Cit	154	0	0	610	278	434	381	411		0	73	0	2060	2860	2419	2181	2515	1267		low	35	1	20.4
	tr|Q8VEH2|Q8VEH2_MOUSE CDKN1A-interacting zinc finger protein 1 OS=Mus musculus OX=10090 GN=Ciz1 PE=1 SV=1;tr|Q3UUV0|Q3UUV0_MOUSE CDKN1A-interacting zinc finger protein 1 OS=Mus musculus OX=10090 GN=Ciz1 PE=1 SV=1;tr|F6XWQ4|F6XWQ4_MOUSE CDKN1A-interacting	Q8VEH2;Q3UUV0;F6XWQ4;F6S5B6;F7D5G9;F7AT58;A0A0A0MQJ7;F7BM53		Ciz1	695	1218	1245	5087	3835	1753	2512	4700		858	1935	1760	2073	2093	4913	6015	3025	1429		high	14	14	24.4
	sp|Q3V1H1|CKAP2_MOUSE Cytoskeleton-associated protein 2 OS=Mus musculus OX=10090 GN=Ckap2 PE=1 SV=1	Q3V1H1	Cytoskeleton-associated protein 2	Ckap2	0	0	0	8158	77294	2994	3275	1925		0	0	0	19044	17927	17590	5721	15319	8637		high	22	22	41.4
	sp|Q7TS74|CKP2L_MOUSE Cytoskeleton-associated protein 2-like OS=Mus musculus OX=10090 GN=Ckap2l PE=1 SV=1;sp|Q7TS74-2|CKP2L_MOUSE Isoform 2 of Cytoskeleton-associated protein 2-like OS=Mus musculus OX=10090 GN=Ckap2l	Q7TS74;Q7TS74-2	Cytoskeleton-associated protein 2-like	Ckap2l	0	0	0	89	0	0	244	0		0	0	0	2632	2695	3602	2722	1614	277		high	12	12	20
	sp|Q8BMK4|CKAP4_MOUSE Cytoskeleton-associated protein 4 OS=Mus musculus OX=10090 GN=Ckap4 PE=1 SV=2	Q8BMK4	Cytoskeleton-associated protein 4	Ckap4	0	0	31	1408	2590	2901	1109	3505		0	0	0	0	1092	0	847	91	48		high	13	13	27.7
	sp|A2AGT5|CKAP5_MOUSE Cytoskeleton-associated protein 5 OS=Mus musculus OX=10090 GN=Ckap5 PE=1 SV=1;sp|A2AGT5-3|CKAP5_MOUSE Isoform 3 of Cytoskeleton-associated protein 5 OS=Mus musculus OX=10090 GN=Ckap5;sp|A2AGT5-2|CKAP5_MOUSE Isoform 2 of Cytoskeleton-a	A2AGT5;A2AGT5-3;A2AGT5-2	Cytoskeleton-associated protein 5	Ckap5	1516	3057	2538	61700	48390	31094	32573	46930		1914	2806	2428	63407	61236	77787	50760	76998	58165		high	91	91	48.7
	sp|Q04447|KCRB_MOUSE Creatine kinase B-type OS=Mus musculus OX=10090 GN=Ckb PE=1 SV=1	Q04447;P07310	Creatine kinase B-type	Ckb	13972	20598	25987	148589	111898	116692	99325	113206		112	746	704	17283	26371	15812	9653	22889	8580		high	20	20	68.2
	sp|P61025|CKS1_MOUSE Cyclin-dependent kinases regulatory subunit 1 OS=Mus musculus OX=10090 GN=Cks1b PE=3 SV=1	P61025	Cyclin-dependent kinases regulatory subunit 1	Cks1b	0	0	0	9759	0	0	0	0		0	0	0	11154	3052	3206	3124	7795	0		medium	3	3	57
	sp|Q80TV8|CLAP1_MOUSE CLIP-associating protein 1 OS=Mus musculus OX=10090 GN=Clasp1 PE=1 SV=2;sp|Q80TV8-2|CLAP1_MOUSE Isoform 2 of CLIP-associating protein 1 OS=Mus musculus OX=10090 GN=Clasp1	Q80TV8;Q80TV8-2	CLIP-associating protein 1	Clasp1	225	341	305	21964	15595	9843	12209	14335		649	653	153	27412	23067	29887	17764	27034	16874		high	61	55	50.2
	sp|Q8BRT1|CLAP2_MOUSE CLIP-associating protein 2 OS=Mus musculus OX=10090 GN=Clasp2 PE=1 SV=1	Q8BRT1;Q8BRT1-6	CLIP-associating protein 2	Clasp2	884	2409	1939	20207	15703	12607	14771	16412		1434	1929	2259	21810	19381	17446	18000	23151	16955		medium	42	30	49.4
	sp|Q8BRT1-5|CLAP2_MOUSE Isoform 2 of CLIP-associating protein 2 OS=Mus musculus OX=10090 GN=Clasp2	Q8BRT1-5	CLIP-associating protein 2	Clasp2	90	966	226	1966	5671	4797	865	6384		0	267	519	9451	7860	4080	7271	6392	7034		high	8	8	51.3
	sp|Q8CFC7-2|CLASR_MOUSE Isoform 2 of CLK4-associating serine/arginine rich protein OS=Mus musculus OX=10090 GN=Clasrp;sp|Q8CFC7-3|CLASR_MOUSE Isoform 3 of CLK4-associating serine/arginine rich protein OS=Mus musculus OX=10090 GN=Clasrp;sp|Q8CFC7|CLASR_MOUS	Q8CFC7-2;Q8CFC7-3;Q8CFC7	CLK4-associating serine/arginine rich protein	Clasrp	359	933	815	5485	6861	3124	6839	6952		835	1317	1712	4308	4419	2070	4204	8180	5816		medium	7	7	27.2
	sp|Q99LI2|CLCC1_MOUSE Chloride channel CLIC-like protein 1 OS=Mus musculus OX=10090 GN=Clcc1 PE=1 SV=1	Q99LI2	Chloride channel CLIC-like protein 1	Clcc1	4247	5936	5095	18720	21444	13709	10359	11737		5272	6102	6726	19060	19373	26193	8638	20795	9312		high	18	18	41.7
	sp|P51791-2|CLCN3_MOUSE Isoform 2 of H(+)/Cl(-) exchange transporter 3 OS=Mus musculus OX=10090 GN=Clcn3;sp|P51791|CLCN3_MOUSE H(+)/Cl(-) exchange transporter 3 OS=Mus musculus OX=10090 GN=Clcn3 PE=1 SV=2	P51791-2;P51791	H(+)/Cl(-) exchange transporter 3	Clcn3	41	0	72	1016	0	0	344	410		0	0	183	276	2436	0	819	790	0		medium	8	5	10.3
	sp|O70496|CLCN7_MOUSE H(+)/Cl(-) exchange transporter 7 OS=Mus musculus OX=10090 GN=Clcn7 PE=1 SV=1	O70496	H(+)/Cl(-) exchange transporter 7	Clcn7	649	482	491	0	3256	458	0	377		412	865	460	468	626	1193	291	965	511		high	10	10	21
	sp|Q9CQX5|CLDN1_MOUSE Claudin domain-containing protein 1 OS=Mus musculus OX=10090 GN=Cldnd1 PE=1 SV=1	Q9CQX5	Claudin domain-containing protein 1	Cldnd1	0	0	0	2988	3758	1717	3194	4307		0	0	0	6570	10382	5218	0	6946	3133		medium	4	4	19
	sp|Q80U30-2|CL16A_MOUSE Isoform 2 of Protein CLEC16A OS=Mus musculus OX=10090 GN=Clec16a;sp|Q80U30|CL16A_MOUSE Protein CLEC16A OS=Mus musculus OX=10090 GN=Clec16a PE=1 SV=2;sp|Q80U30-4|CL16A_MOUSE Isoform 4 of Protein CLEC16A OS=Mus musculus OX=10090 GN=Cl	Q80U30-2;Q80U30;Q80U30-4;Q80U30-3;Q80U30-5	Protein CLEC16A	Clec16a	2987	3228	3620	146	127	83	74385	83		5531	5739	5496	463	0	27962	337	0	0		medium	6	6	11
	sp|Q91V08|CLC2D_MOUSE C-type lectin domain family 2 member D OS=Mus musculus OX=10090 GN=Clec2d PE=1 SV=1	Q91V08;Q9D676-2;Q9D676	C-type lectin domain family 2 member D	Clec2d	7835	8916	8215	34403	35404	19240	26709	49540		2940	8893	7235	32046	30706	27936	40640	52132	27289		high	9	8	55.6
	sp|Q9Z1Q5|CLIC1_MOUSE Chloride intracellular channel protein 1 OS=Mus musculus OX=10090 GN=Clic1 PE=1 SV=3	Q9Z1Q5	Chloride intracellular channel protein 1	Clic1	84766	109854	200906	1922426	1591600	1400649	1297322	1640060		316352	275560	215788	1511844	1735710	1454066	1184094	1795515	1098599		high	21	21	85.5
	sp|Q9QYB1|CLIC4_MOUSE Chloride intracellular channel protein 4 OS=Mus musculus OX=10090 GN=Clic4 PE=1 SV=3	Q9QYB1	Chloride intracellular channel protein 4	Clic4	3304	949	4948	436650	455885	383873	311089	399003		4896	6204	3254	294351	437048	411419	262070	319243	217679		high	21	21	80.6
	sp|Q8BXK9|CLIC5_MOUSE Chloride intracellular channel protein 5 OS=Mus musculus OX=10090 GN=Clic5 PE=1 SV=1	Q8BXK9	Chloride intracellular channel protein 5	Clic5	0	0	0	1756	2105	2642	2712	1078		0	0	0	1128	1240	1254	754	0	954		low	2	1	11.6
	sp|Q99KN9|EPN4_MOUSE Clathrin interactor 1 OS=Mus musculus OX=10090 GN=Clint1 PE=1 SV=2;sp|Q99KN9-2|EPN4_MOUSE Isoform 2 of Clathrin interactor 1 OS=Mus musculus OX=10090 GN=Clint1	Q99KN9;Q99KN9-2	Clathrin interactor 1	Clint1	18844	19318	21590	183873	164687	82466	103697	105072		22138	22624	29269	128178	136300	162255	116800	102519	104330		high	30	30	42.6
	sp|Q922J3|CLIP1_MOUSE CAP-Gly domain-containing linker protein 1 OS=Mus musculus OX=10090 GN=Clip1 PE=1 SV=1;sp|Q922J3-2|CLIP1_MOUSE Isoform 2 of CAP-Gly domain-containing linker protein 1 OS=Mus musculus OX=10090 GN=Clip1	Q922J3;Q922J3-2	CAP-Gly domain-containing linker protein 1	Clip1	5003	8213	8726	70436	43680	30000	31422	36877		5056	7723	5645	44434	49168	51140	32906	46094	27332		high	72	67	62.3
	sp|Q9Z0H8-2|CLIP2_MOUSE Isoform 2 of CAP-Gly domain-containing linker protein 2 OS=Mus musculus OX=10090 GN=Clip2;sp|Q9Z0H8|CLIP2_MOUSE CAP-Gly domain-containing linker protein 2 OS=Mus musculus OX=10090 GN=Clip2 PE=1 SV=2	Q9Z0H8-2;Q9Z0H8	CAP-Gly domain-containing linker protein 2	Clip2	0	26	38	0	0	0	0	0		0	0	0	0	0	0	0	0	0		low	2	2	8.2
	sp|P22518|CLK1_MOUSE Dual specificity protein kinase CLK1 OS=Mus musculus OX=10090 GN=Clk1 PE=1 SV=2	P22518;P22518-2	Dual specificity protein kinase CLK1	Clk1	435	613	719	3563	2643	2653	1373	4391		476	199	969	3721	5264	4335	4124	6406	2193		medium	11	8	25.3
	sp|O35491|CLK2_MOUSE Dual specificity protein kinase CLK2 OS=Mus musculus OX=10090 GN=Clk2 PE=1 SV=2	O35491	Dual specificity protein kinase CLK2	Clk2	291	278	298	797	0	1111	738	1938		0	0	0	1153	2203	689	987	267	1427		medium	6	6	18
	sp|O35492|CLK3_MOUSE Dual specificity protein kinase CLK3 OS=Mus musculus OX=10090 GN=Clk3 PE=1 SV=2	O35492	Dual specificity protein kinase CLK3	Clk3	877	1710	1145	12518	8623	24466	12143	20133		833	1314	1471	13810	12276	14929	40677	9379	9781		high	15	15	24.6
	tr|Q3U466|Q3U466_MOUSE Ceroid-lipofuscinosis, neuronal 6 OS=Mus musculus OX=10090 GN=Cln6 PE=1 SV=1;tr|D6RE34|D6RE34_MOUSE Ceroid-lipofuscinosis, neuronal 6 OS=Mus musculus OX=10090 GN=Cln6 PE=1 SV=1	Q3U466;D6RE34;F6SXC2		Cln6	225	67	374	2800	0	0	0	383		385	316	144	1342	2196	995	0	0	0		medium	4	4	13.3
	sp|Q9QUK3|CLN8_MOUSE Protein CLN8 OS=Mus musculus OX=10090 GN=Cln8 PE=1 SV=1	Q9QUK3	Protein CLN8	Cln8	290	295	0	0	1713	1628	1571	2163		223	249	0	0	0	0	1063	1172	1257		low	2	2	9.4
	sp|Q61189|ICLN_MOUSE Methylosome subunit pICln OS=Mus musculus OX=10090 GN=Clns1a PE=1 SV=1	Q61189	Methylosome subunit pICln	Clns1a	10651	16370	14591	60523	56089	49062	29707	45853		13496	25113	21509	63064	63732	81156	53550	54661	42387		medium	6	6	39.4
	sp|Q99LI9|CLP1_MOUSE Polyribonucleotide 5-hydroxyl-kinase Clp1 OS=Mus musculus OX=10090 GN=Clp1 PE=1 SV=1	Q99LI9	Polyribonucleotide 5-hydroxyl-kinase Clp1	Clp1	1406	1402	1616	15952	11694	19884	16534	19289		1406	1983	3451	29074	33342	28706	32563	19751	13361		high	16	16	37.4
	sp|Q60649|CLPB_MOUSE Caseinolytic peptidase B protein homolog OS=Mus musculus OX=10090 GN=Clpb PE=1 SV=1	Q60649	Caseinolytic peptidase B protein homolog	Clpb	696	871	842	30940	25525	16539	16601	13674		507	1275	1393	37169	23745	37337	24465	35358	23940		high	24	24	45.1
	sp|O88696|CLPP_MOUSE ATP-dependent Clp protease proteolytic subunit, mitochondrial OS=Mus musculus OX=10090 GN=Clpp PE=1 SV=1	O88696	ATP-dependent Clp protease proteolytic subunit, mitochondrial	Clpp	1340	1239	2253	115670	65467	56802	73744	49748		5044	5066	5033	71896	45699	53845	63857	103849	43805		high	11	11	37.9
	sp|Q8VBZ3|CLPT1_MOUSE Cleft lip and palate transmembrane protein 1 homolog OS=Mus musculus OX=10090 GN=Clptm1 PE=1 SV=1	Q8VBZ3	Cleft lip and palate transmembrane protein 1 homolog	Clptm1	595	1225	839	61269	48027	55500	40595	49952		1138	2236	970	63769	60457	67665	41711	67845	69982		high	18	18	37
	sp|Q8BXA5|CLP1L_MOUSE Cleft lip and palate transmembrane protein 1-like protein OS=Mus musculus OX=10090 GN=Clptm1l PE=1 SV=1	Q8BXA5	Cleft lip and palate transmembrane protein 1-like protein	Clptm1l	4451	1592	3111	6890	5108	9178	8756	11541		3904	3353	3425	18091	15999	21868	13227	9125	7451		high	14	14	34.5
	sp|Q9JHS4|CLPX_MOUSE ATP-dependent Clp protease ATP-binding subunit clpX-like, mitochondrial OS=Mus musculus OX=10090 GN=Clpx PE=1 SV=2	Q9JHS4	ATP-dependent Clp protease ATP-binding subunit clpX-like, mitochondrial	Clpx	2537	1872	2069	43953	34113	27032	28889	28763		1762	1977	1968	42564	40526	40181	42853	54906	36299		high	25	25	51.4
	sp|Q80YR7|CLSPN_MOUSE Claspin OS=Mus musculus OX=10090 GN=Clspn PE=1 SV=2	Q80YR7	Claspin	Clspn	0	0	0	8542	3954	4493	1406	2318		0	0	0	8347	9559	7555	4220	7848	7192		high	25	25	29.3
	sp|O08585|CLCA_MOUSE Clathrin light chain A OS=Mus musculus OX=10090 GN=Clta PE=1 SV=2	O08585	Clathrin light chain A	Clta	376	1334	5833	0	1746	0	0	0		2419	5933	3586	6229	3290	0	0	2128	0		medium	5	5	14.9
	sp|Q6IRU5-2|CLCB_MOUSE Isoform 2 of Clathrin light chain B OS=Mus musculus OX=10090 GN=Cltb;sp|Q6IRU5|CLCB_MOUSE Clathrin light chain B OS=Mus musculus OX=10090 GN=Cltb PE=1 SV=1;sp|Q6IRU5-3|CLCB_MOUSE Isoform 3 of Clathrin light chain B OS=Mus musculus OX	Q6IRU5-2;Q6IRU5;Q6IRU5-3	Clathrin light chain B	Cltb	0	514	1707	9565	3610	7285	3037	4096		856	1722	1268	11979	9352	8837	6713	12002	3058		high	8	8	33.2
	sp|Q68FD5|CLH1_MOUSE Clathrin heavy chain 1 OS=Mus musculus OX=10090 GN=Cltc PE=1 SV=3	Q68FD5	Clathrin heavy chain 1	Cltc	46647	68430	59504	749870	598997	437544	438852	452896		86203	71233	70018	718059	705147	643518	521871	592046	483626		high	105	105	67.2
	sp|Q06890|CLUS_MOUSE Clusterin OS=Mus musculus OX=10090 GN=Clu PE=1 SV=1	Q06890	Clusterin;Clusterin beta chain;Clusterin alpha chain	Clu	0	0	157	311	0	0	778	0		391	54	121	0	0	0	0	0	0		medium	4	4	11.8
	sp|Q8R3P7|CLUA1_MOUSE Clusterin-associated protein 1 OS=Mus musculus OX=10090 GN=Cluap1 PE=1 SV=1	Q8R3P7	Clusterin-associated protein 1	Cluap1	0	0	0	0	1021	16193	1297	0		387	122	0	2273	813	2688	1283	1386	0		medium	7	7	22.8
	sp|Q5SW19|CLU_MOUSE Clustered mitochondria protein homolog OS=Mus musculus OX=10090 GN=Cluh PE=1 SV=2;sp|Q5SW19-3|CLU_MOUSE Isoform 3 of Clustered mitochondria protein homolog OS=Mus musculus OX=10090 GN=Cluh;sp|Q5SW19-2|CLU_MOUSE Isoform 2 of Clustered mi	Q5SW19;Q5SW19-3;Q5SW19-2	Clustered mitochondria protein homolog	Cluh	460	585	648	150758	90058	88313	63968	83607		1042	918	1271	182487	184995	178896	121455	193869	136844		high	65	65	60.4
	sp|Q8R4N0|CLYBL_MOUSE Citramalyl-CoA lyase, mitochondrial OS=Mus musculus OX=10090 GN=Clybl PE=1 SV=2	Q8R4N0	Citrate lyase subunit beta-like protein, mitochondrial	Clybl	5252	7027	9664	11845	19525	7579	18579	14630		13216	14298	11891	25081	22833	12916	16926	19887	8851		high	15	15	47.6
	sp|P21844|CMA1_MOUSE Chymase OS=Mus musculus OX=10090 GN=Cma1 PE=1 SV=2	P21844	Chymase	Cma1	0	0	0	0	4793	3744	2268	0		0	0	0	0	0	0	0	0	0		medium	3	3	20.6
	sp|Q61419|CMAH_MOUSE Cytidine monophosphate-N-acetylneuraminic acid hydroxylase OS=Mus musculus OX=10090 GN=Cmah PE=1 SV=1;sp|Q61419-2|CMAH_MOUSE Isoform 2 of Cytidine monophosphate-N-acetylneuraminic acid hydroxylase OS=Mus musculus OX=10090 GN=Cmah	Q61419;Q61419-2	Cytidine monophosphate-N-acetylneuraminic acid hydroxylase	Cmah	2495	2831	3525	3735	4682	1256	4836	3490		9715	7055	6950	5485	6816	4890	11964	5759	4808		high	20	20	35
	sp|Q99KK2|NEUA_MOUSE N-acylneuraminate cytidylyltransferase OS=Mus musculus OX=10090 GN=Cmas PE=1 SV=2;sp|Q99KK2-2|NEUA_MOUSE Isoform 2 of N-acylneuraminate cytidylyltransferase OS=Mus musculus OX=10090 GN=Cmas	Q99KK2;Q99KK2-2	N-acylneuraminate cytidylyltransferase	Cmas	57355	64586	64970	118678	75372	130353	134471	136947		66599	92530	71449	98928	82033	72142	81514	84949	71989		high	29	29	63.4
	sp|Q9CPZ8|COXM1_MOUSE COX assembly mitochondrial protein homolog OS=Mus musculus OX=10090 GN=Cmc1 PE=1 SV=1	Q9CPZ8	COX assembly mitochondrial protein homolog	Cmc1	0	0	279	7845	1182	0	5068	0		309	336	895	5444	6345	1579	0	3514	0		medium	3	3	34
	sp|Q8K199|COXM2_MOUSE COX assembly mitochondrial protein 2 homolog OS=Mus musculus OX=10090 GN=Cmc2 PE=3 SV=1	Q8K199	COX assembly mitochondrial protein 2 homolog	Cmc2	0	0	0	3372	17764	2807	17402	3714		634	0	898	12088	18618	21976	35329	23728	13852		medium	4	4	54.4
	sp|Q9D486|CMIP_MOUSE C-Maf-inducing protein OS=Mus musculus OX=10090 GN=Cmip PE=1 SV=3;sp|Q9D486-2|CMIP_MOUSE Isoform 2 of C-Maf-inducing protein OS=Mus musculus OX=10090 GN=Cmip;sp|Q9D486-3|CMIP_MOUSE Isoform 3 of C-Maf-inducing protein OS=Mus musculus OX	Q9D486;Q9D486-2;Q9D486-3	C-Maf-inducing protein	Cmip	0	0	0	4782	4357	4206	3431	2758		0	0	0	3322	5146	11656	2486	5280	3186		high	10	10	18.4
	sp|Q9DBP5|KCY_MOUSE UMP-CMP kinase OS=Mus musculus OX=10090 GN=Cmpk1 PE=1 SV=1	Q9DBP5	UMP-CMP kinase	Cmpk1	59327	65105	89759	405674	291561	340043	392184	452399		84207	77293	78725	404801	404538	405999	442436	404009	329458		high	17	17	68.4
	sp|Q3U5Q7|CMPK2_MOUSE UMP-CMP kinase 2, mitochondrial OS=Mus musculus OX=10090 GN=Cmpk2 PE=1 SV=2	Q3U5Q7	UMP-CMP kinase 2, mitochondrial	Cmpk2	3020	5055	5859	4196	3622	6078	5185	5799		6184	8211	7385	5758	4057	6126	4120	6457	4274		high	19	19	59.5
	sp|Q9CZT6|CMS1_MOUSE Protein CMSS1 OS=Mus musculus OX=10090 GN=Cmss1 PE=2 SV=1	Q9CZT6	Protein CMSS1	Cmss1	4098	4411	4080	56519	47546	54988	33611	50817		4468	7328	5734	114950	94478	140458	92968	96883	75399		high	8	8	34.4
	sp|Q9CZ69|CKLF6_MOUSE CKLF-like MARVEL transmembrane domain-containing protein 6 OS=Mus musculus OX=10090 GN=Cmtm6 PE=1 SV=1	Q9CZ69	CKLF-like MARVEL transmembrane domain-containing protein 6	Cmtm6	470	600	392	7901	23193	17070	28345	27736		190	364	372	13978	20182	14111	15975	13722	17034		medium	3	3	21.9
	sp|Q9ESD6-2|CKLF7_MOUSE Isoform 2 of CKLF-like MARVEL transmembrane domain-containing protein 7 OS=Mus musculus OX=10090 GN=Cmtm7;sp|Q9ESD6|CKLF7_MOUSE CKLF-like MARVEL transmembrane domain-containing protein 7 OS=Mus musculus OX=10090 GN=Cmtm7 PE=1 SV=1	Q9ESD6-2;Q9ESD6	CKLF-like MARVEL transmembrane domain-containing protein 7	Cmtm7	5495	8069	8157	0	2306	0	2037	3197		10200	15335	11407	3307	1843	0	0	6281	2123		medium	4	4	38.8
	sp|Q9DBC3|CMTR1_MOUSE Cap-specific mRNA (nucleoside-2-O-)-methyltransferase 1 OS=Mus musculus OX=10090 GN=Cmtr1 PE=1 SV=1	Q9DBC3	Cap-specific mRNA (nucleoside-2-O-)-methyltransferase 1	Cmtr1	7353	9887	10303	42532	36226	24822	37761	29228		12668	12261	10991	43686	45842	40084	39824	38662	32283		high	47	47	55.9
	sp|Q8BWQ4|CMTR2_MOUSE Cap-specific mRNA (nucleoside-2-O-)-methyltransferase 2 OS=Mus musculus OX=10090 GN=Cmtr2 PE=2 SV=1	Q8BWQ4	Cap-specific mRNA (nucleoside-2-O-)-methyltransferase 2	Cmtr2	0	0	0	723	725	334	967	846		220	0	260	639	1401	463	670	1734	428		high	12	12	25
	sp|P53996-2|CNBP_MOUSE Isoform 2 of Cellular nucleic acid-binding protein OS=Mus musculus OX=10090 GN=Cnbp;sp|P53996-3|CNBP_MOUSE Isoform 3 of Cellular nucleic acid-binding protein OS=Mus musculus OX=10090 GN=Cnbp	P53996-2;P53996-3	Cellular nucleic acid-binding protein	Cnbp	135593	105207	55201	1064910	960079	732482	449949	1095271		83580	111316	139564	1392166	1280006	1202229	841446	1598995	799450		low	17	3	72.9
	sp|P53996|CNBP_MOUSE Cellular nucleic acid-binding protein OS=Mus musculus OX=10090 GN=Cnbp PE=1 SV=2	P53996;Q9D548	Cellular nucleic acid-binding protein	Cnbp	8198	10225	2838	156555	105416	63150	50543	124359		3473	8044	11673	192504	168226	145981	106622	234960	156800		low	2	2	69.1
	sp|Q9D1A2|CNDP2_MOUSE Cytosolic non-specific dipeptidase OS=Mus musculus OX=10090 GN=Cndp2 PE=1 SV=1	Q9D1A2	Cytosolic non-specific dipeptidase	Cndp2	35013	49730	54078	551321	444296	302657	426103	351368		80536	85778	75853	391174	410338	462426	308618	461516	275132		high	33	33	81.9
	sp|Q3UJ81|NEPR1_MOUSE Nuclear envelope phosphatase-regulatory subunit 1 OS=Mus musculus OX=10090 GN=Cnep1r1 PE=1 SV=1	Q3UJ81;Q3UJ81-3;Q3UJ81-2	Nuclear envelope phosphatase-regulatory subunit 1	Cnep1r1	0	0	0	5014	2538	0	3036	0		0	0	0	3324	2995	1871	6037	746	649		medium	3	3	29.6
	sp|O35372|CNIH1_MOUSE Protein cornichon homolog 1 OS=Mus musculus OX=10090 GN=Cnih1 PE=2 SV=2	O35372	Protein cornichon homolog 1	Cnih1	0	0	0	5094	0	0	0	6385		0	0	0	5749	5220	12337	0	7515	3514		low	1	1	20.1
	sp|Q9CX13|CNIH4_MOUSE Protein cornichon homolog 4 OS=Mus musculus OX=10090 GN=Cnih4 PE=2 SV=1	Q9CX13	Protein cornichon homolog 4	Cnih4	295	0	0	6104	10391	5746	3326	14522		0	0	0	14160	20125	26512	9784	7833	13257		low	1	1	14.4
	sp|Q08093|CNN2_MOUSE Calponin-2 OS=Mus musculus OX=10090 GN=Cnn2 PE=1 SV=1	Q08093	Calponin-2	Cnn2	41723	57909	78977	680408	521161	416513	411266	464098		89435	126010	125158	460712	437855	642099	353310	463246	343060		high	18	17	66.6
	sp|Q9DAW9|CNN3_MOUSE Calponin-3 OS=Mus musculus OX=10090 GN=Cnn3 PE=1 SV=1	Q9DAW9	Calponin-3	Cnn3	1043	995	2433	73184	50842	26717	45019	40899		308	1459	2077	39138	29009	37181	27631	48999	22009		high	13	13	50.3
	sp|Q32NY4-2|CNNM3_MOUSE Isoform 2 of Metal transporter CNNM3 OS=Mus musculus OX=10090 GN=Cnnm3;sp|Q32NY4|CNNM3_MOUSE Metal transporter CNNM3 OS=Mus musculus OX=10090 GN=Cnnm3 PE=1 SV=2	Q32NY4-2;Q32NY4	Metal transporter CNNM3	Cnnm3	130	108	271	16207	3554	2031	3097	3004		0	398	348	5328	4329	4147	4567	2110	3816		high	19	18	30.4
	sp|Q69ZF7|CNNM4_MOUSE Metal transporter CNNM4 OS=Mus musculus OX=10090 GN=Cnnm4 PE=1 SV=2	Q69ZF7	Metal transporter CNNM4	Cnnm4	0	0	0	213	649	10383	250	0		0	0	0	489	199	1637	124	1730	0		high	8	7	16.7
	sp|Q6ZQ08-4|CNOT1_MOUSE Isoform 4 of CCR4-NOT transcription complex subunit 1 OS=Mus musculus OX=10090 GN=Cnot1;sp|Q6ZQ08|CNOT1_MOUSE CCR4-NOT transcription complex subunit 1 OS=Mus musculus OX=10090 GN=Cnot1 PE=1 SV=2	Q6ZQ08-4;Q6ZQ08;Q6ZQ08-3	CCR4-NOT transcription complex subunit 1	Cnot1	1401	2547	3204	59140	45619	36996	36089	39897		2695	2911	3672	53686	52024	65917	35139	52699	39825		low	104	2	52.6
	sp|Q6ZQ08-2|CNOT1_MOUSE Isoform 2 of CCR4-NOT transcription complex subunit 1 OS=Mus musculus OX=10090 GN=Cnot1	Q6ZQ08-2	CCR4-NOT transcription complex subunit 1	Cnot1	0	0	0	515	399	216	118	299		0	37	0	588	661	610	410	525	404		low	1	1	52.6
	sp|Q8BH15|CNO10_MOUSE CCR4-NOT transcription complex subunit 10 OS=Mus musculus OX=10090 GN=Cnot10 PE=1 SV=1;sp|Q8BH15-2|CNO10_MOUSE Isoform 2 of CCR4-NOT transcription complex subunit 10 OS=Mus musculus OX=10090 GN=Cnot10;sp|Q8BH15-3|CNO10_MOUSE Isoform 3	Q8BH15;Q8BH15-2;Q8BH15-3;Q8BH15-4;Q8BH15-6	CCR4-NOT transcription complex subunit 10	Cnot10	218	385	432	20229	18631	13374	16267	13616		790	629	679	26117	24035	24717	23847	23301	22253		medium	26	16	48.4
	sp|Q9CWN7|CNO11_MOUSE CCR4-NOT transcription complex subunit 11 OS=Mus musculus OX=10090 GN=Cnot11 PE=1 SV=1	Q9CWN7	CCR4-NOT transcription complex subunit 11	Cnot11	61	203	295	17540	10666	14358	14014	13832		1258	190	490	20973	21448	16672	14165	27233	16230		high	11	11	39.2
	sp|Q8C5L3|CNOT2_MOUSE CCR4-NOT transcription complex subunit 2 OS=Mus musculus OX=10090 GN=Cnot2 PE=1 SV=2;sp|Q8C5L3-2|CNOT2_MOUSE Isoform 2 of CCR4-NOT transcription complex subunit 2 OS=Mus musculus OX=10090 GN=Cnot2;sp|Q8C5L3-3|CNOT2_MOUSE Isoform 3 of	Q8C5L3;Q8C5L3-2;Q8C5L3-3	CCR4-NOT transcription complex subunit 2	Cnot2	64	155	416	39184	16538	13598	27463	22865		691	823	964	21846	31017	33701	29773	24344	13770		high	16	16	47.4
	sp|Q8K0V4|CNOT3_MOUSE CCR4-NOT transcription complex subunit 3 OS=Mus musculus OX=10090 GN=Cnot3 PE=1 SV=1	Q8K0V4	CCR4-NOT transcription complex subunit 3	Cnot3	3745	2889	2801	23501	19025	15535	22468	23491		6310	9877	6457	23750	16981	23282	16707	33435	21415		high	21	21	32.8
	sp|Q8BT14-2|CNOT4_MOUSE Isoform 2 of CCR4-NOT transcription complex subunit 4 OS=Mus musculus OX=10090 GN=Cnot4;sp|Q8BT14|CNOT4_MOUSE CCR4-NOT transcription complex subunit 4 OS=Mus musculus OX=10090 GN=Cnot4 PE=1 SV=2	Q8BT14-2;Q8BT14	CCR4-NOT transcription complex subunit 4	Cnot4	75	0	154	2916	3780	3478	5520	4391		651	189	84	2469	9690	9408	1820	7217	10241		low	14	2	35
	sp|Q8BT14-3|CNOT4_MOUSE Isoform 3 of CCR4-NOT transcription complex subunit 4 OS=Mus musculus OX=10090 GN=Cnot4	Q8BT14-3	CCR4-NOT transcription complex subunit 4	Cnot4	0	0	0	1964	1490	0	671	1088		136	0	0	0	1083	0	750	0	0		low	1	1	24.8
	sp|Q8K3P5-2|CNOT6_MOUSE Isoform 2 of CCR4-NOT transcription complex subunit 6 OS=Mus musculus OX=10090 GN=Cnot6;sp|Q8K3P5|CNOT6_MOUSE CCR4-NOT transcription complex subunit 6 OS=Mus musculus OX=10090 GN=Cnot6 PE=1 SV=2;sp|Q8K3P5-3|CNOT6_MOUSE Isoform 3 of	Q8K3P5-2;Q8K3P5;Q8K3P5-3	CCR4-NOT transcription complex subunit 6	Cnot6	115	127	203	910	267	1381	1680	1055		91	148	126	913	1764	1031	663	1938	1183		high	8	8	21.2
	sp|Q8VEG6|CNO6L_MOUSE CCR4-NOT transcription complex subunit 6-like OS=Mus musculus OX=10090 GN=Cnot6l PE=1 SV=2;sp|Q8VEG6-2|CNO6L_MOUSE Isoform 2 of CCR4-NOT transcription complex subunit 6-like OS=Mus musculus OX=10090 GN=Cnot6l;sp|Q8VEG6-3|CNO6L_MOUSE I	Q8VEG6;Q8VEG6-2;Q8VEG6-3	CCR4-NOT transcription complex subunit 6-like	Cnot6l	1172	1620	1917	3589	6800	3806	2392	5615		1829	2001	2118	4421	5299	9072	7116	6944	3514		high	15	14	36.6
	sp|Q60809|CNOT7_MOUSE CCR4-NOT transcription complex subunit 7 OS=Mus musculus OX=10090 GN=Cnot7 PE=1 SV=1	Q60809	CCR4-NOT transcription complex subunit 7	Cnot7	1384	2689	1064	15282	10173	11711	16993	3683		1346	2100	2592	17598	23157	15501	16857	30683	10118		high	9	9	46.3
	sp|Q9D8X5|CNOT8_MOUSE CCR4-NOT transcription complex subunit 8 OS=Mus musculus OX=10090 GN=Cnot8 PE=2 SV=1	Q9D8X5	CCR4-NOT transcription complex subunit 8	Cnot8	464	171	614	19943	8392	12061	15730	12569		1311	1587	1593	34921	24000	28532	15070	34994	25339		high	10	10	52.4
	sp|P16330|CN37_MOUSE 2,3-cyclic-nucleotide 3-phosphodiesterase OS=Mus musculus OX=10090 GN=Cnp PE=1 SV=3;sp|P16330-2|CN37_MOUSE Isoform CNPI of 2,3-cyclic-nucleotide 3-phosphodiesterase OS=Mus musculus OX=10090 GN=Cnp	P16330;P16330-2	2,3-cyclic-nucleotide 3-phosphodiesterase	Cnp	42385	48457	51726	99889	133946	87239	97132	142484		70472	74647	68013	102176	84005	62044	99565	79120	77921		high	27	27	67.4
	sp|Q9QXT0|CNPY2_MOUSE Protein canopy homolog 2 OS=Mus musculus OX=10090 GN=Cnpy2 PE=1 SV=1	Q9QXT0	Protein canopy homolog 2	Cnpy2	7639	4998	5878	85721	90245	67794	78028	56351		7621	8440	15956	160400	168167	126021	72139	95704	62337		high	13	13	59.3
	sp|Q9DAU1|CNPY3_MOUSE Protein canopy homolog 3 OS=Mus musculus OX=10090 GN=Cnpy3 PE=1 SV=1	Q9DAU1;Q9DAU1-2	Protein canopy homolog 3	Cnpy3	1857	1070	726	24842	21594	11867	19210	12093		658	677	1208	26014	25844	33318	15915	31523	29496		high	9	9	40.2
	sp|Q8BQ47|CNPY4_MOUSE Protein canopy homolog 4 OS=Mus musculus OX=10090 GN=Cnpy4 PE=1 SV=1	Q8BQ47	Protein canopy homolog 4	Cnpy4	980	1177	3904	19759	14244	6459	9665	4025		2263	6630	4469	9574	11953	6133	3961	16433	7845		high	9	9	38.4
	sp|P47936|CNR2_MOUSE Cannabinoid receptor 2 OS=Mus musculus OX=10090 GN=Cnr2 PE=1 SV=1	P47936	Cannabinoid receptor 2	Cnr2	90	0	0	0	0	0	0	0		0	182	503	0	0	0	0	0	0		low	1	1	3.2
	sp|Q8CBC4|CNST_MOUSE Consortin OS=Mus musculus OX=10090 GN=Cnst PE=1 SV=1;sp|Q8CBC4-3|CNST_MOUSE Isoform 3 of Consortin OS=Mus musculus OX=10090 GN=Cnst	Q8CBC4;Q8CBC4-3	Consortin	Cnst	326	437	465	806	175	785	274	434		310	300	260	120	0	0	0	0	0		medium	7	7	11.8
	sp|A2AL36|CNTRL_MOUSE Centriolin OS=Mus musculus OX=10090 GN=Cntrl PE=1 SV=2	A2AL36;A2AL36-2	Centriolin	Cntrl	539	1730	1298	2999	1263	769	810	1965		1477	1484	1788	2515	3214	6568	2056	4020	671		high	69	69	35.6
	sp|Q8CB62|CNTRB_MOUSE Centrobin OS=Mus musculus OX=10090 GN=Cntrob PE=2 SV=2;sp|Q8CB62-2|CNTRB_MOUSE Isoform 2 of Centrobin OS=Mus musculus OX=10090 GN=Cntrob	Q8CB62;Q8CB62-2	Centrobin	Cntrob	45	51	38	0	96	0	0	0		0	0	0	0	0	0	0	0	0		medium	4	4	6.2
	sp|Q99M07|COA5_MOUSE Cytochrome c oxidase assembly factor 5 OS=Mus musculus OX=10090 GN=Coa5 PE=1 SV=1	Q99M07	Cytochrome c oxidase assembly factor 5	Coa5	0	0	0	0	0	0	0	0		0	0	0	5267	4224	3616	0	0	0		low	2	2	33.8
	sp|Q921H9|COA7_MOUSE Cytochrome c oxidase assembly factor 7 OS=Mus musculus OX=10090 GN=Coa7 PE=1 SV=1	Q921H9	Cytochrome c oxidase assembly factor 7	Coa7	0	714	832	59426	8058	25223	40669	13012		2218	0	864	59505	59373	60264	49794	68519	32291		high	9	9	50.6
	sp|Q9DBL7|COASY_MOUSE Bifunctional coenzyme A synthase OS=Mus musculus OX=10090 GN=Coasy PE=1 SV=2	Q9DBL7	Bifunctional coenzyme A synthase;Phosphopantetheine adenylyltransferase;Dephospho-CoA kinase	Coasy	745	1135	2054	18965	11895	8553	8685	9803		1652	1953	2491	15255	17743	16349	14507	12796	12808		high	19	19	43.3
	sp|Q3UMF0-3|COBL1_MOUSE Isoform 3 of Cordon-bleu protein-like 1 OS=Mus musculus OX=10090 GN=Cobll1;sp|Q3UMF0-4|COBL1_MOUSE Isoform 4 of Cordon-bleu protein-like 1 OS=Mus musculus OX=10090 GN=Cobll1;sp|Q3UMF0-2|COBL1_MOUSE Isoform 2 of Cordon-bleu protein-l	Q3UMF0-3;Q3UMF0-4;Q3UMF0-2;Q3UMF0	Cordon-bleu protein-like 1	Cobll1	0	0	0	0	122	0	0	93		0	0	0	109	16	0	223	0	724		medium	5	5	5.5
	sp|Q9Z160|COG1_MOUSE Conserved oligomeric Golgi complex subunit 1 OS=Mus musculus OX=10090 GN=Cog1 PE=1 SV=3	Q9Z160	Conserved oligomeric Golgi complex subunit 1	Cog1	113	402	448	4216	4901	3702	2469	3703		155	198	264	4223	3898	6132	6072	3593	3895		high	27	27	36.2
	sp|Q921L5|COG2_MOUSE Conserved oligomeric Golgi complex subunit 2 OS=Mus musculus OX=10090 GN=Cog2 PE=1 SV=2	Q921L5	Conserved oligomeric Golgi complex subunit 2	Cog2	237	440	1074	7593	7397	6162	7310	7018		882	928	637	8019	12663	9627	11088	8348	10038		high	24	24	52.7
	sp|Q8CI04|COG3_MOUSE Conserved oligomeric Golgi complex subunit 3 OS=Mus musculus OX=10090 GN=Cog3 PE=1 SV=3	Q8CI04;REV__D3Z752	Conserved oligomeric Golgi complex subunit 3	Cog3	218	669	441	11660	8527	6723	6788	7038		299	703	683	9380	6281	14943	6419	7677	6972		high	28	28	44.1
	sp|Q8R1U1|COG4_MOUSE Conserved oligomeric Golgi complex subunit 4 OS=Mus musculus OX=10090 GN=Cog4 PE=1 SV=1	Q8R1U1	Conserved oligomeric Golgi complex subunit 4	Cog4	66	118	200	5519	2639	3018	2130	4085		275	203	218	7543	7722	7690	7073	8148	2115		high	23	23	39.1
	sp|Q8C0L8|COG5_MOUSE Conserved oligomeric Golgi complex subunit 5 OS=Mus musculus OX=10090 GN=Cog5 PE=1 SV=3	Q8C0L8	Conserved oligomeric Golgi complex subunit 5	Cog5	300	536	863	13028	8571	10319	8833	11625		251	400	765	16957	12987	9750	12646	21437	6901		high	29	29	49.7
	sp|Q8R3I3|COG6_MOUSE Conserved oligomeric Golgi complex subunit 6 OS=Mus musculus OX=10090 GN=Cog6 PE=1 SV=2	Q8R3I3	Conserved oligomeric Golgi complex subunit 6	Cog6	190	127	223	12695	1662	502	0	911		74	350	240	2459	6218	3399	10769	1075	556		high	14	14	31.8
	sp|Q3UM29|COG7_MOUSE Conserved oligomeric Golgi complex subunit 7 OS=Mus musculus OX=10090 GN=Cog7 PE=1 SV=1	Q3UM29	Conserved oligomeric Golgi complex subunit 7	Cog7	86	249	26	6797	2042	3399	5737	1837		191	124	248	10245	10047	8559	8991	9438	8604		high	27	27	46.2
	sp|Q9JJA2|COG8_MOUSE Conserved oligomeric Golgi complex subunit 8 OS=Mus musculus OX=10090 GN=Cog8 PE=1 SV=3	Q9JJA2	Conserved oligomeric Golgi complex subunit 8	Cog8	0	0	280	5010	3091	1176	1752	0		217	308	217	5370	1735	4588	1091	2701	1700		high	12	12	31.2
	sp|Q5SU73|COIL_MOUSE Coilin OS=Mus musculus OX=10090 GN=Coil PE=1 SV=1	Q5SU73	Coilin	Coil	574	556	525	22797	10955	9633	7009	9670		429	1030	1126	17121	17622	16636	10602	15731	12417		high	12	12	33.3
	sp|Q9EQG9|CERT_MOUSE Ceramide transfer protein OS=Mus musculus OX=10090 GN=Cert1 PE=1 SV=1;sp|Q9EQG9-2|CERT_MOUSE Isoform 2 of Ceramide transfer protein OS=Mus musculus OX=10090 GN=Cert1;sp|Q9EQG9-3|CERT_MOUSE Isoform 3 of Ceramide transfer protein OS=Mus	Q9EQG9;Q9EQG9-2;Q9EQG9-3	Collagen type IV alpha-3-binding protein	Col4a3bp	1691	2294	1791	12059	19362	11358	10103	16760		2247	3151	4228	18642	22004	42091	11983	16262	15618		high	22	22	43.1
	sp|Q04857|CO6A1_MOUSE Collagen alpha-1(VI) chain OS=Mus musculus OX=10090 GN=Col6a1 PE=1 SV=1	Q04857	Collagen alpha-1(VI) chain	Col6a1	0	0	0	0	3768	0	168	2677		0	0	0	805	10132	0	79	0	625		high	8	8	10.8
	sp|Q8K297|GT251_MOUSE Procollagen galactosyltransferase 1 OS=Mus musculus OX=10090 GN=Colgalt1 PE=1 SV=2	Q8K297	Procollagen galactosyltransferase 1	Colgalt1	97	0	0	14156	6971	10024	7496	6963		0	0	215	14957	18547	25270	16606	17521	9247		high	16	16	37
	sp|Q8K4M5|COMD1_MOUSE COMM domain-containing protein 1 OS=Mus musculus OX=10090 GN=Commd1 PE=1 SV=2	Q8K4M5	COMM domain-containing protein 1	Commd1	428	742	1177	41548	17469	13674	20452	13082		2024	2195	1842	44651	35687	22648	31173	16226	10597		medium	6	6	49.5
	sp|Q8JZY2|COMDA_MOUSE COMM domain-containing protein 10 OS=Mus musculus OX=10090 GN=Commd10 PE=1 SV=1	Q8JZY2	COMM domain-containing protein 10	Commd10	0	0	182	24336	17695	23742	20336	19476		281	0	0	17478	15487	24028	22629	17087	15387		high	11	11	60.9
	sp|Q8BXC6|COMD2_MOUSE COMM domain-containing protein 2 OS=Mus musculus OX=10090 GN=Commd2 PE=1 SV=1	Q8BXC6	COMM domain-containing protein 2	Commd2	968	958	2529	15598	23347	38724	32748	19449		2500	2383	2417	31565	24500	23113	72068	39411	29964		high	10	10	53.3
	sp|Q63829|COMD3_MOUSE COMM domain-containing protein 3 OS=Mus musculus OX=10090 GN=Commd3 PE=1 SV=1	Q63829	COMM domain-containing protein 3	Commd3	76	0	819	35913	12033	0	8338	13621		246	605	354	35450	17991	33595	11031	18245	6273		high	9	9	57.9
	sp|Q9CQ02|COMD4_MOUSE COMM domain-containing protein 4 OS=Mus musculus OX=10090 GN=Commd4 PE=1 SV=1	Q9CQ02	COMM domain-containing protein 4	Commd4	305	357	1216	47957	31432	26940	25857	19594		1483	1746	1186	34045	39134	34201	34008	29382	33728		medium	6	6	38.2
	sp|Q8R395|COMD5_MOUSE COMM domain-containing protein 5 OS=Mus musculus OX=10090 GN=Commd5 PE=1 SV=1	Q8R395	COMM domain-containing protein 5	Commd5	253	375	367	2680	2892	1808	0	2498		845	0	1039	3863	3414	5523	2817	5283	0		medium	4	4	24.6
	sp|Q3V4B5|COMD6_MOUSE COMM domain-containing protein 6 OS=Mus musculus OX=10090 GN=Commd6 PE=1 SV=1	Q3V4B5	COMM domain-containing protein 6	Commd6	0	0	0	2261	0	0	2780	0		0	0	486	19999	7531	2838	2559	4582	0		medium	4	4	59.8
	sp|Q8BG94|COMD7_MOUSE COMM domain-containing protein 7 OS=Mus musculus OX=10090 GN=Commd7 PE=1 SV=1	Q8BG94	COMM domain-containing protein 7	Commd7	0	0	590	13630	9325	22928	9674	11031		0	0	234	27611	22040	33528	24662	29931	16080		high	9	9	43.5
	sp|Q9CZG3|COMD8_MOUSE COMM domain-containing protein 8 OS=Mus musculus OX=10090 GN=Commd8 PE=1 SV=1	Q9CZG3	COMM domain-containing protein 8	Commd8	0	0	0	4621	0	0	1132	0		0	0	0	2874	899	4596	1228	2189	0		medium	3	3	20.8
	sp|Q8K2Q0|COMD9_MOUSE COMM domain-containing protein 9 OS=Mus musculus OX=10090 GN=Commd9 PE=1 SV=3	Q8K2Q0	COMM domain-containing protein 9	Commd9	874	1301	993	39747	21493	23776	10612	29806		2584	3098	2407	29308	16410	24729	31408	11681	26684		high	10	10	68.7
	sp|O88587-2|COMT_MOUSE Isoform Soluble of Catechol O-methyltransferase OS=Mus musculus OX=10090 GN=Comt;sp|O88587|COMT_MOUSE Catechol O-methyltransferase OS=Mus musculus OX=10090 GN=Comt PE=1 SV=2	O88587-2;O88587	Catechol O-methyltransferase	Comt	1001	1373	1337	65961	54423	37678	36060	40117		2583	2272	1332	65674	69030	48750	55241	62429	31561		high	15	15	83.3
	sp|Q8BIG7|CMTD1_MOUSE Catechol O-methyltransferase domain-containing protein 1 OS=Mus musculus OX=10090 GN=Comtd1 PE=1 SV=1	Q8BIG7	Catechol O-methyltransferase domain-containing protein 1	Comtd1	0	204	186	6420	3781	2149	9318	17340		707	393	842	43494	46654	14795	27612	38688	4071		medium	5	5	25.2
	sp|Q8CIE6|COPA_MOUSE Coatomer subunit alpha OS=Mus musculus OX=10090 GN=Copa PE=1 SV=2	Q8CIE6	Coatomer subunit alpha;Xenin;Proxenin	Copa	16100	22819	22970	252725	206219	134353	138703	172776		23142	30314	26726	248551	223778	255072	232759	254169	177599		high	76	76	64.8
	sp|Q9JIF7|COPB_MOUSE Coatomer subunit beta OS=Mus musculus OX=10090 GN=Copb1 PE=1 SV=1	Q9JIF7	Coatomer subunit beta	Copb1	19123	23459	21447	278791	219813	178788	187129	197008		31767	33433	31840	223097	221496	290704	186448	226451	183690		high	54	54	63.8
	sp|O55029|COPB2_MOUSE Coatomer subunit beta OS=Mus musculus OX=10090 GN=Copb2 PE=1 SV=2	O55029	Coatomer subunit beta	Copb2	20436	30113	29420	221454	204583	157686	177693	190914		32064	40501	37371	260097	272509	231637	220862	234686	180207		high	56	56	72
	sp|O89079|COPE_MOUSE Coatomer subunit epsilon OS=Mus musculus OX=10090 GN=Cope PE=1 SV=3	O89079	Coatomer subunit epsilon	Cope	2254	4549	6401	284857	251321	217386	216018	274241		8245	7498	7538	243711	294911	327217	232871	293276	270673		high	19	19	65.3
	sp|Q9QZE5|COPG1_MOUSE Coatomer subunit gamma-1 OS=Mus musculus OX=10090 GN=Copg1 PE=1 SV=1	Q9QZE5	Coatomer subunit gamma-1	Copg1	12556	17233	15837	202953	168027	169417	116902	132567		26047	24313	23479	230771	239159	248942	231200	307847	166520		high	50	47	70.8
	sp|Q9QXK3-4|COPG2_MOUSE Isoform 4 of Coatomer subunit gamma-2 OS=Mus musculus OX=10090 GN=Copg2;sp|Q9QXK3|COPG2_MOUSE Coatomer subunit gamma-2 OS=Mus musculus OX=10090 GN=Copg2 PE=1 SV=1;sp|Q9QXK3-3|COPG2_MOUSE Isoform 3 of Coatomer subunit gamma-2 OS=Mus	Q9QXK3-4;Q9QXK3;Q9QXK3-3;Q9QXK3-2	Coatomer subunit gamma-2	Copg2	5142	5910	4721	20794	23003	18556	20471	21506		3206	3103	4315	17306	17865	14551	14324	11763	12353		high	35	35	58.9
	sp|P61202|CSN2_MOUSE COP9 signalosome complex subunit 2 OS=Mus musculus OX=10090 GN=Cops2 PE=1 SV=1;sp|P61202-2|CSN2_MOUSE Isoform 2 of COP9 signalosome complex subunit 2 OS=Mus musculus OX=10090 GN=Cops2	P61202;P61202-2	COP9 signalosome complex subunit 2	Cops2	22239	25009	23871	209894	141467	129580	121352	112970		19128	37075	27621	161732	188126	210968	247260	174412	120637		high	25	25	57.3
	sp|O88543|CSN3_MOUSE COP9 signalosome complex subunit 3 OS=Mus musculus OX=10090 GN=Cops3 PE=1 SV=3	O88543	COP9 signalosome complex subunit 3	Cops3	4623	5344	7444	157237	133216	128760	105764	130447		12989	9259	8562	182397	186954	213241	143465	199013	144498		high	20	20	64.3
	sp|O88544|CSN4_MOUSE COP9 signalosome complex subunit 4 OS=Mus musculus OX=10090 GN=Cops4 PE=1 SV=1	O88544	COP9 signalosome complex subunit 4	Cops4	3475	3961	7623	301926	236396	184145	132126	190640		9526	10422	12567	288129	316212	437173	256074	315661	196639		high	28	28	78.1
	sp|O35864|CSN5_MOUSE COP9 signalosome complex subunit 5 OS=Mus musculus OX=10090 GN=Cops5 PE=1 SV=3	O35864	COP9 signalosome complex subunit 5	Cops5	4137	6436	12644	138160	123775	119544	72786	83714		8993	14217	11989	188168	144259	169439	96483	206503	157304		high	18	18	66.5
	sp|O88545|CSN6_MOUSE COP9 signalosome complex subunit 6 OS=Mus musculus OX=10090 GN=Cops6 PE=1 SV=1	O88545	COP9 signalosome complex subunit 6	Cops6	2288	4273	6840	201413	178731	117214	130060	109399		6377	7365	8077	197826	211037	512533	172326	173630	179016		high	12	12	55.2
	sp|Q9CZ04|CSN7A_MOUSE COP9 signalosome complex subunit 7a OS=Mus musculus OX=10090 GN=Cops7a PE=1 SV=2;sp|Q9CZ04-2|CSN7A_MOUSE Isoform 2 of COP9 signalosome complex subunit 7a OS=Mus musculus OX=10090 GN=Cops7a	Q9CZ04;Q9CZ04-2	COP9 signalosome complex subunit 7a	Cops7a	863	1808	2281	38829	40991	29721	20768	49034		280	3374	4423	34073	30555	43968	34508	66217	37284		high	9	9	40
	sp|Q8BV13|CSN7B_MOUSE COP9 signalosome complex subunit 7b OS=Mus musculus OX=10090 GN=Cops7b PE=1 SV=1	Q8BV13	COP9 signalosome complex subunit 7b	Cops7b	399	464	753	21042	7286	20145	15916	14539		1079	2026	2129	32716	20536	20691	293768	20488	26217		high	9	9	41.3
	sp|Q8VBV7|CSN8_MOUSE COP9 signalosome complex subunit 8 OS=Mus musculus OX=10090 GN=Cops8 PE=1 SV=1	Q8VBV7	COP9 signalosome complex subunit 8	Cops8	500	941	1506	47340	37550	35186	72243	29508		1755	2521	3389	90715	87500	70505	28323	81399	35230		high	9	9	54.1
	sp|P61924|COPZ1_MOUSE Coatomer subunit zeta-1 OS=Mus musculus OX=10090 GN=Copz1 PE=1 SV=1	P61924	Coatomer subunit zeta-1	Copz1	10596	12311	19733	272263	204912	160913	225290	202392		32237	33292	31038	291480	218599	300339	186021	309471	124361		medium	7	7	44.1
	sp|Q8BMS4|COQ3_MOUSE Ubiquinone biosynthesis O-methyltransferase, mitochondrial OS=Mus musculus OX=10090 GN=Coq3 PE=1 SV=1	Q8BMS4	Ubiquinone biosynthesis O-methyltransferase, mitochondrial	Coq3	0	0	486	2692	2360	6193	4484	6574		0	51	37	10080	8823	12524	8483	9759	9208		high	8	8	26.2
	sp|Q8BGB8|COQ4_MOUSE Ubiquinone biosynthesis protein COQ4 homolog, mitochondrial OS=Mus musculus OX=10090 GN=Coq4 PE=1 SV=1	Q8BGB8	Ubiquinone biosynthesis protein COQ4 homolog, mitochondrial	Coq4	0	0	0	6277	1823	3749	0	0		0	0	0	5483	4039	5033	3429	13262	836		medium	5	5	25.6
	sp|Q9CXI0|COQ5_MOUSE 2-methoxy-6-polyprenyl-1,4-benzoquinol methylase, mitochondrial OS=Mus musculus OX=10090 GN=Coq5 PE=1 SV=2	Q9CXI0	2-methoxy-6-polyprenyl-1,4-benzoquinol methylase, mitochondrial	Coq5	801	978	903	13902	11847	7151	8331	8904		1322	1345	1599	19838	20003	20563	18529	8593	11540		high	13	13	50.8
	sp|Q8R1S0|COQ6_MOUSE Ubiquinone biosynthesis monooxygenase COQ6, mitochondrial OS=Mus musculus OX=10090 GN=Coq6 PE=1 SV=3	Q8R1S0	Ubiquinone biosynthesis monooxygenase COQ6, mitochondrial	Coq6	1083	397	384	2135	1609	2285	1383	1807		715	596	582	4366	5119	4874	5846	5912	1177339		high	12	12	32.8
	sp|P97478|COQ7_MOUSE 5-demethoxyubiquinone hydroxylase, mitochondrial OS=Mus musculus OX=10090 GN=Coq7 PE=1 SV=3	P97478	5-demethoxyubiquinone hydroxylase, mitochondrial	Coq7	0	0	241	2050	2894	4543	4274	2148		0	325	285	0	5836	7992	4177	5393	3619		medium	7	7	34.6
	sp|Q8K1Z0|COQ9_MOUSE Ubiquinone biosynthesis protein COQ9, mitochondrial OS=Mus musculus OX=10090 GN=Coq9 PE=1 SV=1	Q8K1Z0	Ubiquinone biosynthesis protein COQ9, mitochondrial	Coq9	776	243	462	26201	25868	4052	13572	21243		2532	886	832	33162	31197	17725	28758	35502	27904		high	9	9	40.3
	sp|O89053|COR1A_MOUSE Coronin-1A OS=Mus musculus OX=10090 GN=Coro1a PE=1 SV=5	O89053	Coronin-1A	Coro1a	2172414	2382137	2465875	4996403	4019475	2887566	2913390	3781939		2992194	2891740	2425511	3371542	3565754	2865203	2448797	3762599	2473726		high	51	49	72.2
	sp|Q9WUM3|COR1B_MOUSE Coronin-1B OS=Mus musculus OX=10090 GN=Coro1b PE=1 SV=1	Q9WUM3	Coronin-1B	Coro1b	66143	60118	52905	97406	71440	36190	61057	70934		65082	81597	80339	81975	75984	81622	65472	75767	49504		high	26	26	47.9
	sp|Q9WUM4|COR1C_MOUSE Coronin-1C OS=Mus musculus OX=10090 GN=Coro1c PE=1 SV=2	Q9WUM4	Coronin-1C	Coro1c	40640	48489	31802	143501	111454	81188	99127	90443		43529	46298	40145	123649	130409	113743	83509	110444	82372		high	27	25	52.3
	sp|Q8C0P5|COR2A_MOUSE Coronin-2A OS=Mus musculus OX=10090 GN=Coro2a PE=2 SV=1	Q8C0P5	Coronin-2A	Coro2a	0	0	0	6868	4309	3057	4437	4099		957	871	1156	17352	18946	20959	26112	26773	26140		high	19	18	44.7
	sp|Q9D2V7|CORO7_MOUSE Coronin-7 OS=Mus musculus OX=10090 GN=Coro7 PE=1 SV=2	Q9D2V7	Coronin-7	Coro7	16083	31181	30214	97883	82791	60666	53056	81085		17878	24120	21609	43348	42889	46583	33123	43273	32865		high	43	43	66.6
	sp|Q9CQI6|COTL1_MOUSE Coactosin-like protein OS=Mus musculus OX=10090 GN=Cotl1 PE=1 SV=3	Q9CQI6	Coactosin-like protein	Cotl1	1548738	1678991	1401077	3080519	3255837	2035924	2338401	3454243		2558700	3063499	2657393	2806112	3142935	2343248	1741906	3356476	2118706		high	20	20	93.7
	sp|Q8CFY5|COX10_MOUSE Protoheme IX farnesyltransferase, mitochondrial OS=Mus musculus OX=10090 GN=Cox10 PE=2 SV=1	Q8CFY5	Protoheme IX farnesyltransferase, mitochondrial	Cox10	0	327	0	681	7025	9052	4775	7159		0	0	0	15018	7959	11932	8305	10914	10308		medium	4	4	16.5
	sp|Q6P8I6|COX11_MOUSE Cytochrome c oxidase assembly protein COX11, mitochondrial OS=Mus musculus OX=10090 GN=Cox11 PE=1 SV=1	Q6P8I6	Cytochrome c oxidase assembly protein COX11, mitochondrial	Cox11	0	57	0	11903	6461	5813	6479	9014		45	218	0	9968	3325	4321	9258	10032	7554		medium	4	4	30.2
	sp|Q8BJ03-2|COX15_MOUSE Isoform 2 of Cytochrome c oxidase assembly protein COX15 homolog OS=Mus musculus OX=10090 GN=Cox15;sp|Q8BJ03|COX15_MOUSE Cytochrome c oxidase assembly protein COX15 homolog OS=Mus musculus OX=10090 GN=Cox15 PE=1 SV=1	Q8BJ03-2;Q8BJ03	Cytochrome c oxidase assembly protein COX15 homolog	Cox15	0	0	0	5741	7807	6120	10434	4065		0	0	0	7253	5999	8308	8263	7960	5467		medium	7	7	22.2
	sp|Q9CR63|COX16_MOUSE Cytochrome c oxidase assembly protein COX16 homolog, mitochondrial OS=Mus musculus OX=10090 GN=Cox16 PE=3 SV=1	Q9CR63	Cytochrome c oxidase assembly protein COX16 homolog, mitochondrial	Cox16	0	0	0	9330	9207	0	0	6547		0	0	0	16419	23358	12891	7085	15377	0		medium	4	4	34.9
	sp|P56394|COX17_MOUSE Cytochrome c oxidase copper chaperone OS=Mus musculus OX=10090 GN=Cox17 PE=1 SV=2	P56394	Cytochrome c oxidase copper chaperone	Cox17	0	0	945	17184	15269	38082	12560	0		0	1745	0	27716	26442	24804	13389	19229	0		medium	4	4	77.8
	sp|Q8VC74|COX18_MOUSE Cytochrome c oxidase assembly protein COX18, mitochondrial OS=Mus musculus OX=10090 GN=Cox18 PE=1 SV=5	Q8VC74	Mitochondrial inner membrane protein COX18	Cox18	0	0	0	0	464	0	0	966		0	0	0	1966	0	663	1047	0	0		medium	3	3	11.2
	sp|Q9D7J4|COX20_MOUSE Cytochrome c oxidase assembly protein COX20, mitochondrial OS=Mus musculus OX=10090 GN=Cox20 PE=1 SV=1	Q9D7J4	Cytochrome c oxidase protein 20 homolog	Cox20	0	0	0	48813	0	23168	46705	12775		0	642	0	14627	21443	12312	60876	33732	38041		medium	3	3	32.5
	sp|P19783|COX41_MOUSE Cytochrome c oxidase subunit 4 isoform 1, mitochondrial OS=Mus musculus OX=10090 GN=Cox4i1 PE=1 SV=2	P19783	Cytochrome c oxidase subunit 4 isoform 1, mitochondrial	Cox4i1	38311	45491	76388	926669	332313	416208	318133	240604		97926	108752	97404	981616	793551	499816	657996	928743	406784		high	12	12	54.4
	sp|P12787|COX5A_MOUSE Cytochrome c oxidase subunit 5A, mitochondrial OS=Mus musculus OX=10090 GN=Cox5a PE=1 SV=2	P12787	Cytochrome c oxidase subunit 5A, mitochondrial	Cox5a	5412	8491	12255	201877	89912	77378	62382	84116		44537	27775	26146	268517	192911	108377	68002	122808	49712		high	10	10	54.1
	sp|P19536|COX5B_MOUSE Cytochrome c oxidase subunit 5B, mitochondrial OS=Mus musculus OX=10090 GN=Cox5b PE=1 SV=1	P19536	Cytochrome c oxidase subunit 5B, mitochondrial	Cox5b	1470	4288	496	25403	13919	0	0	11528		0	1090	8587	0	13012	17862	0	19235	0		medium	4	4	26.6
	sp|P43024|CX6A1_MOUSE Cytochrome c oxidase subunit 6A1, mitochondrial OS=Mus musculus OX=10090 GN=Cox6a1 PE=1 SV=2	P43024	Cytochrome c oxidase subunit 6A1, mitochondrial	Cox6a1	1580	0	2786	107967	5363	0	2863	4861		5763	3934	2160	13170	11340	6028	8757	8482	19476		low	2	2	38.7
	sp|P56391|CX6B1_MOUSE Cytochrome c oxidase subunit 6B1 OS=Mus musculus OX=10090 GN=Cox6b1 PE=1 SV=2	P56391	Cytochrome c oxidase subunit 6B1	Cox6b1	777	5186	4878	35410	5234	0	4219	4033		7733	8042	11616	53113	38370	8065	24012	38715	9585		high	8	8	72.1
	sp|Q9CPQ1|COX6C_MOUSE Cytochrome c oxidase subunit 6C OS=Mus musculus OX=10090 GN=Cox6c PE=1 SV=3	Q9CPQ1	Cytochrome c oxidase subunit 6C	Cox6c	5111	0	0	0	10416	0	11774	0		13958	16989	17340	47998	8358	5541	0	14490	9513		medium	4	4	39.5
	sp|P48771|CX7A2_MOUSE Cytochrome c oxidase subunit 7A2, mitochondrial OS=Mus musculus OX=10090 GN=Cox7a2 PE=1 SV=2	P48771	Cytochrome c oxidase subunit 7A2, mitochondrial	Cox7a2	0	0	0	2356	5233	0	0	1472		0	0	1353	13139	0	3909	0	0	0		low	2	2	27.7
	sp|Q61387|COX7R_MOUSE Cytochrome c oxidase subunit 7A-related protein, mitochondrial OS=Mus musculus OX=10090 GN=Cox7a2l PE=1 SV=1	Q61387	Cytochrome c oxidase subunit 7A-related protein, mitochondrial	Cox7a2l	0	0	0	6640	0	0	0	1200		0	0	0	9850	1702	0	0	6893	0		medium	3	3	35.1
	sp|P15089|CBPA3_MOUSE Mast cell carboxypeptidase A OS=Mus musculus OX=10090 GN=Cpa3 PE=2 SV=1	P15089	Mast cell carboxypeptidase A	Cpa3	0	0	86	0	1062	1000	0	0		0	47	0	1281	0	0	0	0	0		medium	4	4	14.1
	sp|O89001|CBPD_MOUSE Carboxypeptidase D OS=Mus musculus OX=10090 GN=Cpd PE=1 SV=2	O89001	Carboxypeptidase D	Cpd	0	0	0	228	0	0	0	166		57	66	39	454	492	495	452	267	0		medium	7	7	5.7
	sp|Q80V42|CBPM_MOUSE Carboxypeptidase M OS=Mus musculus OX=10090 GN=Cpm PE=1 SV=2	Q80V42;Q80V42-2	Carboxypeptidase M	Cpm	2744	3206	2869	13724	10498	4836	4243	5327		1610	2225	2835	1840	3060	4437	2465	2012	1238		high	8	8	21.9
	sp|Q8C166|CPNE1_MOUSE Copine-1 OS=Mus musculus OX=10090 GN=Cpne1 PE=1 SV=1	Q8C166	Copine-1	Cpne1	38324	38510	36358	116228	43765	51000	99276	72971		31888	52650	55866	95048	75319	122579	64337	66066	59895		high	22	22	47.8
	sp|Q8BT60|CPNE3_MOUSE Copine-3 OS=Mus musculus OX=10090 GN=Cpne3 PE=1 SV=2	Q8BT60;Q0VE82;Q9DC53	Copine-3	Cpne3	10173	11151	9901	87917	79801	71984	70714	76469		17197	14357	17428	30390	36694	33766	60426	46774	46087		high	25	23	48.2
	sp|P36552|HEM6_MOUSE Oxygen-dependent coproporphyrinogen-III oxidase, mitochondrial OS=Mus musculus OX=10090 GN=Cpox PE=1 SV=2	P36552	Oxygen-dependent coproporphyrinogen-III oxidase, mitochondrial	Cpox	2392	2846	1756	44782	49423	34762	24299	33381		5010	5544	4243	56895	73618	67490	44262	49968	44922		high	21	21	49.7
	sp|Q8BFS6|CPPED_MOUSE Serine/threonine-protein phosphatase CPPED1 OS=Mus musculus OX=10090 GN=Cpped1 PE=1 SV=1;sp|Q8BFS6-4|CPPED_MOUSE Isoform 4 of Serine/threonine-protein phosphatase CPPED1 OS=Mus musculus OX=10090 GN=Cpped1;sp|Q8BFS6-2|CPPED_MOUSE Isofo	Q8BFS6;Q8BFS6-4;Q8BFS6-2;Q8BFS6-3;Q8BFS6-5	Serine/threonine-protein phosphatase CPPED1	Cpped1	0	0	0	5436	3458	3925	2529	3529		0	0	0	12674	3897	12264	5812	3971	4672		high	8	8	34.9
	sp|Q9EPU4|CPSF1_MOUSE Cleavage and polyadenylation specificity factor subunit 1 OS=Mus musculus OX=10090 GN=Cpsf1 PE=1 SV=1	Q9EPU4	Cleavage and polyadenylation specificity factor subunit 1	Cpsf1	8412	7481	9089	36064	26346	35279	27314	28095		10566	12516	8958	45130	36437	59360	35493	38457	31223		high	67	67	54.4
	sp|O35218|CPSF2_MOUSE Cleavage and polyadenylation specificity factor subunit 2 OS=Mus musculus OX=10090 GN=Cpsf2 PE=1 SV=1	O35218	Cleavage and polyadenylation specificity factor subunit 2	Cpsf2	10662	13049	10655	75896	58283	39140	53396	50685		13745	18383	16960	70791	68959	63007	55529	71960	38764		high	41	41	63.9
	sp|Q9QXK7|CPSF3_MOUSE Cleavage and polyadenylation specificity factor subunit 3 OS=Mus musculus OX=10090 GN=Cpsf3 PE=1 SV=2	Q9QXK7	Cleavage and polyadenylation specificity factor subunit 3	Cpsf3	10877	16454	15372	90016	29553	55000	80629	64543		14377	13963	21731	91604	92318	74048	73788	83645	42040		high	36	36	60.1
	sp|Q9CWS4|INT11_MOUSE Integrator complex subunit 11 OS=Mus musculus OX=10090 GN=Ints11 PE=1 SV=1	Q9CWS4	Integrator complex subunit 11	Cpsf3l	2596	2771	3075	24181	19769	14899	20203	18371		1918	4593	4666	22930	20785	21783	30300	20188	16434		high	22	22	45
	sp|Q8BQZ5|CPSF4_MOUSE Cleavage and polyadenylation specificity factor subunit 4 OS=Mus musculus OX=10090 GN=Cpsf4 PE=2 SV=1	Q8BQZ5	Cleavage and polyadenylation specificity factor subunit 4	Cpsf4	4119	2173	4782	120504	95982	87808	75284	98693		5231	5881	10510	126081	90465	117721	92309	104908	124883		low	13	5	63
	sp|Q8BQZ5-3|CPSF4_MOUSE Isoform 3 of Cleavage and polyadenylation specificity factor subunit 4 OS=Mus musculus OX=10090 GN=Cpsf4;sp|Q8BQZ5-2|CPSF4_MOUSE Isoform 2 of Cleavage and polyadenylation specificity factor subunit 4 OS=Mus musculus OX=10090 GN=Cpsf	Q8BQZ5-3;Q8BQZ5-2	Cleavage and polyadenylation specificity factor subunit 4	Cpsf4	2182	3274	2940	3787	12363	0	12776	3317		2523	4258	6862	8821	848	18352	11092	1601	10124		low	2	2	52.8
	sp|Q6NVF9|CPSF6_MOUSE Cleavage and polyadenylation specificity factor subunit 6 OS=Mus musculus OX=10090 GN=Cpsf6 PE=1 SV=1	Q6NVF9	Cleavage and polyadenylation specificity factor subunit 6	Cpsf6	23629	32503	34479	193808	70684	82856	125499	105117		27386	34444	28837	168046	149092	126574	102065	233587	79115		high	13	13	24.3
	sp|Q8BTV2|CPSF7_MOUSE Cleavage and polyadenylation specificity factor subunit 7 OS=Mus musculus OX=10090 GN=Cpsf7 PE=1 SV=2;sp|Q8BTV2-2|CPSF7_MOUSE Isoform 2 of Cleavage and polyadenylation specificity factor subunit 7 OS=Mus musculus OX=10090 GN=Cpsf7	Q8BTV2;Q8BTV2-2;Q8BTV2-3	Cleavage and polyadenylation specificity factor subunit 7	Cpsf7	7423	9895	7021	12019	20496	21719	28854	29618		10466	12960	6619	8854	16098	12418	21131	25273	19168		high	16	16	36.1
	sp|P97742|CPT1A_MOUSE Carnitine O-palmitoyltransferase 1, liver isoform OS=Mus musculus OX=10090 GN=Cpt1a PE=1 SV=4	P97742	Carnitine O-palmitoyltransferase 1, liver isoform	Cpt1a	7858	7553	9561	10562	11652	5315	5283	11748		8760	9717	10684	10521	5329	8893	4369	4081	5074		high	22	22	37.5
	sp|P52825|CPT2_MOUSE Carnitine O-palmitoyltransferase 2, mitochondrial OS=Mus musculus OX=10090 GN=Cpt2 PE=1 SV=2	P52825	Carnitine O-palmitoyltransferase 2, mitochondrial	Cpt2	3222	4037	3923	10651	16037	13301	12744	14984		6421	6753	6730	11182	14708	15187	13432	12917	10953		high	26	26	49.8
	sp|Q8BS40|CPTP_MOUSE Ceramide-1-phosphate transfer protein OS=Mus musculus OX=10090 GN=Cptp PE=1 SV=1	Q8BS40	Ceramide-1-phosphate transfer protein	Cptp	0	0	0	974	976	0	1252	0		0	0	0	3023	0	0	798	0	948		low	2	2	11.1
	sp|Q64735-2|CR1L_MOUSE Isoform 2 of Complement component receptor 1-like protein OS=Mus musculus OX=10090 GN=Cr1l;sp|Q64735|CR1L_MOUSE Complement component receptor 1-like protein OS=Mus musculus OX=10090 GN=Cr1l PE=1 SV=1	Q64735-2;Q64735	Complement component receptor 1-like protein	Cr1l	7449	3762	8262	20203	24544	16007	13826	13879		5346	14666	15231	24428	36174	23124	29914	47561	14232		high	12	12	31.4
	sp|P22935|RABP2_MOUSE Cellular retinoic acid-binding protein 2 OS=Mus musculus OX=10090 GN=Crabp2 PE=2 SV=2	P22935	Cellular retinoic acid-binding protein 2	Crabp2	0	0	0	21575	28131	16767	5425	12051		0	0	0	24150	33896	50436	21321	45651	41795		medium	6	5	50.7
	sp|Q3UP38|EFC4B_MOUSE EF-hand calcium-binding domain-containing protein 4B OS=Mus musculus OX=10090 GN=Cracr2a PE=2 SV=1	Q3UP38	EF-hand calcium-binding domain-containing protein 4B	Cracr2a	1231	0	0	0	0	335	0	0		4775	1208	0	0	565	0	467	390	0		medium	3	3	12.6
	sp|O88843|CRADD_MOUSE Death domain-containing protein CRADD OS=Mus musculus OX=10090 GN=Cradd PE=1 SV=2	O88843	Death domain-containing protein CRADD	Cradd	0	0	0	7539	1960	4354	2981	0		0	0	0	2880	4090	2900	1115	1684	699		medium	4	4	43.2
	sp|Q6PG95|CRML_MOUSE Protein cramped-like OS=Mus musculus OX=10090 GN=Cramp1 PE=1 SV=3	Q6PG95	Protein cramped-like	Cramp1l	0	0	0	676	363	100	54	211		1094	4234	0	208	201	739	489	14879	189		high	14	14	18.8
	sp|P47934|CACP_MOUSE Carnitine O-acetyltransferase OS=Mus musculus OX=10090 GN=Crat PE=1 SV=3	P47934	Carnitine O-acetyltransferase	Crat	148	24	168	0	0	0	0	0		0	0	0	0	0	0	0	0	0		medium	3	3	5.3
	sp|Q8C7D2-2|CRBN_MOUSE Isoform 2 of Protein cereblon OS=Mus musculus OX=10090 GN=Crbn;sp|Q8C7D2-3|CRBN_MOUSE Isoform 3 of Protein cereblon OS=Mus musculus OX=10090 GN=Crbn;sp|Q8C7D2|CRBN_MOUSE Protein cereblon OS=Mus musculus OX=10090 GN=Crbn PE=1 SV=1	Q8C7D2-2;Q8C7D2-3;Q8C7D2	Protein cereblon	Crbn	240	133	411	5596	5355	4674	6223	5802		129	324	105	4315	2490	3994	4738	4739	6192		high	14	14	41.8
	sp|Q01147|CREB1_MOUSE Cyclic AMP-responsive element-binding protein 1 OS=Mus musculus OX=10090 GN=Creb1 PE=1 SV=1;sp|Q01147-2|CREB1_MOUSE Isoform 2 of Cyclic AMP-responsive element-binding protein 1 OS=Mus musculus OX=10090 GN=Creb1	Q01147;Q01147-2	Cyclic AMP-responsive element-binding protein 1	Creb1	13695	19136	17194	126273	121798	101788	101854	86546		17219	20762	23034	123741	70155	37488	81357	97852	49245		medium	9	6	29
	sp|P45481|CBP_MOUSE Histone lysine acetyltransferase CREBBP OS=Mus musculus OX=10090 GN=Crebbp PE=1 SV=3	P45481	CREB-binding protein	Crebbp	299	698	636	3249	2096	1314	1742	1363		297	452	598	2174	2370	2422	1805	2984	1202		high	40	30	22.7
	sp|Q8CDG5|CRERF_MOUSE CREB3 regulatory factor OS=Mus musculus OX=10090 GN=Crebrf PE=2 SV=1	Q8CDG5	CREB3 regulatory factor	Crebrf	429	420	570	0	0	0	0	0		744	224	426	0	0	0	0	0	0		medium	7	7	14.5
	sp|O88668|CREG1_MOUSE Protein CREG1 OS=Mus musculus OX=10090 GN=Creg1 PE=1 SV=1	O88668	Protein CREG1	Creg1	0	0	0	3387	2843	1225	6187	0		0	0	0	3578	4251	4334	2689	0	1302		medium	3	3	19.1
	sp|Q9CYA0|CREL2_MOUSE Protein disulfide isomerase Creld2 OS=Mus musculus OX=10090 GN=Creld2 PE=1 SV=1	Q9CYA0	Cysteine-rich with EGF-like domain protein 2	Creld2	833	1183	645	35720	47683	25636	19930	28754		928	2330	1692	64246	62989	66071	31672	52474	61425		high	11	11	43.1
	sp|P27699-10|CREM_MOUSE Isoform 10 of cAMP-responsive element modulator OS=Mus musculus OX=10090 GN=Crem;sp|P27699-2|CREM_MOUSE Isoform 2 of cAMP-responsive element modulator OS=Mus musculus OX=10090 GN=Crem;sp|P27699-8|CREM_MOUSE Isoform 8 of cAMP-respons	P27699-10;P27699-2;P27699-8;P27699-7;P27699-6;P27699-5;P27699-11;P27699-4;P27699-3;P27699-9;P27699	cAMP-responsive element modulator	Crem	0	0	0	0	707	976	3058	0		0	0	0	0	0	0	0	0	0		low	2	2	28.8
	sp|P63254|CRIP1_MOUSE Cysteine-rich protein 1 OS=Mus musculus OX=10090 GN=Crip1 PE=1 SV=2	P63254	Cysteine-rich protein 1	Crip1	108187	69936	167861	1400272	295102	116747	40338	271693		130556	164264	484588	640235	489892	383268	325119	969744	128657		high	8	8	80.5
	sp|Q9DCT8|CRIP2_MOUSE Cysteine-rich protein 2 OS=Mus musculus OX=10090 GN=Crip2 PE=1 SV=1	Q9DCT8	Cysteine-rich protein 2	Crip2	0	0	603	20468	14918	15211	11498	9872		765	520	261	29062	24923	25901	22528	34186	16730		medium	5	5	38.5
	sp|O70333|CRIPT_MOUSE Cysteine-rich PDZ-binding protein OS=Mus musculus OX=10090 GN=Cript PE=1 SV=1	O70333	Cysteine-rich PDZ-binding protein	Cript	0	0	0	41533	20695	8324	32303	2255		0	0	836	51594	15259	36079	16039	21077	10962		medium	4	4	33.7
	sp|Q64010|CRK_MOUSE Adapter molecule crk OS=Mus musculus OX=10090 GN=Crk PE=1 SV=1;sp|Q64010-2|CRK_MOUSE Isoform Crk-I of Adapter molecule crk OS=Mus musculus OX=10090 GN=Crk	Q64010;Q64010-2	Adapter molecule crk	Crk	54	0	122	10379	9110	2650	8761	6139		247	698	0	13531	15779	10683	9861	10942	2028		high	14	14	59.5
	sp|P47941|CRKL_MOUSE Crk-like protein OS=Mus musculus OX=10090 GN=Crkl PE=1 SV=2	P47941	Crk-like protein	Crkl	4988	8738	14206	172171	137114	68623	127201	127095		16234	20143	19073	149397	140832	144510	110975	141514	86296		high	17	17	65.3
	sp|Q8CII9-2|CRLF2_MOUSE Isoform 2 of Cytokine receptor-like factor 2 OS=Mus musculus OX=10090 GN=Crlf2;sp|Q8CII9|CRLF2_MOUSE Cytokine receptor-like factor 2 OS=Mus musculus OX=10090 GN=Crlf2 PE=1 SV=2;sp|Q8CII9-3|CRLF2_MOUSE Isoform 3 of Cytokine receptor-	Q8CII9-2;Q8CII9;Q8CII9-3	Cytokine receptor-like factor 2	Crlf2	0	0	0	0	0	0	0	1213		0	0	0	1628	0	1279	0	0	0		low	2	2	9.2
	sp|Q9Z2L7|CRLF3_MOUSE Cytokine receptor-like factor 3 OS=Mus musculus OX=10090 GN=Crlf3 PE=1 SV=1;sp|Q9Z2L7-2|CRLF3_MOUSE Isoform 2 of Cytokine receptor-like factor 3 OS=Mus musculus OX=10090 GN=Crlf3	Q9Z2L7;Q9Z2L7-2	Cytokine receptor-like factor 3	Crlf3	54856	74357	70383	187614	119308	113405	98527	106745		49005	88290	63436	135934	137588	172884	63268	95337	73263		high	28	28	71.9
	sp|Q80ZM8|CRLS1_MOUSE Cardiolipin synthase (CMP-forming) OS=Mus musculus OX=10090 GN=Crls1 PE=1 SV=1	Q80ZM8	Cardiolipin synthase (CMP-forming)	Crls1	0	0	0	2007	2483	1509	1330	1014		0	0	0	3578	4289	1902	1504	4463	1259		low	1	1	6.6
	sp|P97427|DPYL1_MOUSE Dihydropyrimidinase-related protein 1 OS=Mus musculus OX=10090 GN=Crmp1 PE=1 SV=1	P97427	Dihydropyrimidinase-related protein 1	Crmp1	263	310	85	4308	3255	948	1626	1853		0	0	0	0	0	0	161	0	0		high	13	12	45.8
	sp|P63154|CRNL1_MOUSE Crooked neck-like protein 1 OS=Mus musculus OX=10090 GN=Crnkl1 PE=1 SV=1	P63154	Crooked neck-like protein 1	Crnkl1	9016	9432	9079	63291	59250	37012	61678	56353		8445	12171	10705	86479	82983	88737	85753	76517	68805		high	42	42	55.8
	sp|Q8CJ40|CROCC_MOUSE Rootletin OS=Mus musculus OX=10090 GN=Crocc PE=1 SV=2;sp|Q8CJ40-2|CROCC_MOUSE Isoform 2 of Rootletin OS=Mus musculus OX=10090 GN=Crocc;sp|Q8CJ40-3|CROCC_MOUSE Isoform 3 of Rootletin OS=Mus musculus OX=10090 GN=Crocc	Q8CJ40;Q8CJ40-2;Q8CJ40-3	Rootletin	Crocc	1632	3066	3751	1794	2039	12392	8839	1999		1589	2828	4335	17311	12928	10032	13313	14014	11670		high	27	27	17.1
	sp|Q9DC50|OCTC_MOUSE Peroxisomal carnitine O-octanoyltransferase OS=Mus musculus OX=10090 GN=Crot PE=1 SV=1	Q9DC50	Peroxisomal carnitine O-octanoyltransferase	Crot	1534	2003	2778	5841	5025	3833	6214	6949		2601	5396	2530	5486	5343	878	2628	3616	1928		high	17	17	35.6
	sp|Q149L7|CRTAM_MOUSE Cytotoxic and regulatory T-cell molecule OS=Mus musculus OX=10090 GN=Crtam PE=1 SV=2;sp|Q149L7-3|CRTAM_MOUSE Isoform 3 of Cytotoxic and regulatory T-cell molecule OS=Mus musculus OX=10090 GN=Crtam;sp|Q149L7-2|CRTAM_MOUSE Isoform 2 of	Q149L7;Q149L7-3;Q149L7-2	Cytotoxic and regulatory T-cell molecule	Crtam	0	0	0	0	0	0	0	0		0	0	0	2731	0	1621	0	914	0		low	2	2	7.9
	sp|Q9CYD3|CRTAP_MOUSE Cartilage-associated protein OS=Mus musculus OX=10090 GN=Crtap PE=1 SV=3	Q9CYD3	Cartilage-associated protein	Crtap	0	0	0	237	0	0	1199	0		0	0	0	2222	1441	977	985	1318	0		medium	3	3	11.5
	sp|Q68ED7|CRTC1_MOUSE CREB-regulated transcription coactivator 1 OS=Mus musculus OX=10090 GN=Crtc1 PE=1 SV=1	Q68ED7	CREB-regulated transcription coactivator 1	Crtc1	0	0	0	306	0	383	0	0		0	0	0	569	0	355	0	0	0		medium	3	3	9.2
	sp|Q3U182|CRTC2_MOUSE CREB-regulated transcription coactivator 2 OS=Mus musculus OX=10090 GN=Crtc2 PE=1 SV=2	Q3U182	CREB-regulated transcription coactivator 2	Crtc2	0	0	0	1476	3333	2343	0	1769		0	0	0	1678	2900	3314	0	2076	0		medium	7	7	16.2
	sp|Q91X84|CRTC3_MOUSE CREB-regulated transcription coactivator 3 OS=Mus musculus OX=10090 GN=Crtc3 PE=1 SV=2	Q91X84	CREB-regulated transcription coactivator 3	Crtc3	303	159	135	1892	2269	1488	0	194		0	670	241	0	0	0	377	1257	1009		medium	6	6	14.4
	sp|P97784|CRY1_MOUSE Cryptochrome-1 OS=Mus musculus OX=10090 GN=Cry1 PE=1 SV=1	P97784	Cryptochrome-1	Cry1	0	0	0	1074	4114	54659	236478	1346		0	0	0	1919	3568	4007	2162	1859	2285		medium	10	7	22.3
	sp|Q9R194|CRY2_MOUSE Cryptochrome-2 OS=Mus musculus OX=10090 GN=Cry2 PE=1 SV=1	Q9R194	Cryptochrome-2	Cry2	0	0	0	152	227	215	122	282		0	0	0	0	125	41	151	203	229		low	2	2	11
	sp|Q99KP3|CRYL1_MOUSE Lambda-crystallin homolog OS=Mus musculus OX=10090 GN=Cryl1 PE=1 SV=3	Q99KP3	Lambda-crystallin homolog	Cryl1	9070	13665	14920	36242	52645	36809	41408	56715		12645	14256	13620	13313	18233	20791	22622	14082	26665		high	18	18	65.8
	sp|P47199|QOR_MOUSE Quinone oxidoreductase OS=Mus musculus OX=10090 GN=Cryz PE=1 SV=1	P47199	Quinone oxidoreductase	Cryz	383	0	74	1734	5538	1351	0	59		0	73	137	6526	5440	2163	4536	2530	3995		medium	6	6	27.2
	sp|Q921W4|QORL1_MOUSE Quinone oxidoreductase-like protein 1 OS=Mus musculus OX=10090 GN=Cryzl1 PE=1 SV=1;sp|Q921W4-2|QORL1_MOUSE Isoform 2 of Quinone oxidoreductase-like protein 1 OS=Mus musculus OX=10090 GN=Cryzl1	Q921W4;Q921W4-2	Quinone oxidoreductase-like protein 1	Cryzl1	3958	1721	4473	22214	22076	22160	20548	26682		6223	4369	3814	23524	23184	20909	26978	25390	21193		high	10	10	40.2
	sp|Q9CZU6|CISY_MOUSE Citrate synthase, mitochondrial OS=Mus musculus OX=10090 GN=Cs PE=1 SV=1	Q9CZU6	Citrate synthase, mitochondrial	Cs	40863	53878	82311	584511	457123	407596	369090	413542		60861	85398	80807	571289	601255	611239	431638	518240	375863		high	23	23	50.2
	sp|Q9DBE0|CSAD_MOUSE Cysteine sulfinic acid decarboxylase OS=Mus musculus OX=10090 GN=Csad PE=1 SV=1	Q9DBE0	Cysteine sulfinic acid decarboxylase	Csad	48	255	296	0	0	0	0	0		135	180	218	0	0	0	0	0	0		medium	4	4	9.5
	sp|Q91W50|CSDE1_MOUSE Cold shock domain-containing protein E1 OS=Mus musculus OX=10090 GN=Csde1 PE=1 SV=1	Q91W50	Cold shock domain-containing protein E1	Csde1	8505	10281	10361	447154	473904	365171	352357	338611		12652	16750	25004	522166	510188	508952	456194	553117	467413		high	49	49	71.2
	sp|Q9ERK4|XPO2_MOUSE Exportin-2 OS=Mus musculus OX=10090 GN=Cse1l PE=1 SV=1	Q9ERK4	Exportin-2	Cse1l	21893	25084	71880	1014291	1190738	178442	693840	266249		19761	23602	30285	295784	720438	834478	284354	350587	264482		high	50	50	55.6
	sp|Q8C1F4|CGAT2_MOUSE Chondroitin sulfate N-acetylgalactosaminyltransferase 2 OS=Mus musculus OX=10090 GN=Csgalnact2 PE=2 SV=1	Q8C1F4	Chondroitin sulfate N-acetylgalactosaminyltransferase 2	Csgalnact2	36	37	37	0	0	0	0	0		0	122	0	0	0	0	0	0	0		low	2	2	5.4
	sp|P41241|CSK_MOUSE Tyrosine-protein kinase CSK OS=Mus musculus OX=10090 GN=Csk PE=1 SV=2	P41241	Tyrosine-protein kinase CSK	Csk	22226	30744	34952	325088	254511	200777	254148	253388		27059	30583	35809	203813	202547	225844	182583	226132	164220		high	31	30	70.7
	sp|Q8BK63|KC1A_MOUSE Casein kinase I isoform alpha OS=Mus musculus OX=10090 GN=Csnk1a1 PE=1 SV=2	Q8BK63	Casein kinase I isoform alpha	Csnk1a1	11320	11332	11372	112206	67524	42864	60715	53066		6145	11510	9085	69769	89664	63178	90024	89019	65508		low	21	2	62.9
	sp|Q8BK63-2|KC1A_MOUSE Isoform 2 of Casein kinase I isoform alpha OS=Mus musculus OX=10090 GN=Csnk1a1	Q8BK63-2	Casein kinase I isoform alpha	Csnk1a1	414	0	251	1844	2041	1224	1305	0		262	288	189	912	1031	98	1674	921	0		low	1	1	64
	sp|Q9DC28|KC1D_MOUSE Casein kinase I isoform delta OS=Mus musculus OX=10090 GN=Csnk1d PE=1 SV=2	Q9DC28	Casein kinase I isoform delta	Csnk1d	3276	4366	4298	10829	14283	22522	20149	23771		1694	3691	5157	18038	24881	29922	20490	21391	23664		low	19	2	54.5
	sp|Q9JMK2|KC1E_MOUSE Casein kinase I isoform epsilon OS=Mus musculus OX=10090 GN=Csnk1e PE=1 SV=2	Q9JMK2	Casein kinase I isoform epsilon	Csnk1e	0	0	0	619	1604	2670	0	1835		0	0	0	1677	2488	1732	795	2030	1770		medium	6	6	42.5
	sp|Q8BTH8|KC1G1_MOUSE Casein kinase I isoform gamma-1 OS=Mus musculus OX=10090 GN=Csnk1g1 PE=1 SV=2	Q8BTH8	Casein kinase I isoform gamma-1	Csnk1g1	361	492	524	1905	1831	1088	571	1823		81	815	438	1781	1287	3726	1298	1562	1641		high	8	7	28.3
	sp|Q8BVP5|KC1G2_MOUSE Casein kinase I isoform gamma-2 OS=Mus musculus OX=10090 GN=Csnk1g2 PE=1 SV=1	Q8BVP5	Casein kinase I isoform gamma-2	Csnk1g2	381	1533	1857	2368	0	358	1746	1875		863	2419	1929	1001	528	1029	0	1591	0		low	15	6	36.6
	sp|Q8C4X2|KC1G3_MOUSE Casein kinase I isoform gamma-3 OS=Mus musculus OX=10090 GN=Csnk1g3 PE=1 SV=2	Q8C4X2	Casein kinase I isoform gamma-3	Csnk1g3	257	263	329	0	0	1212	1240	0		0	199	466	1613	1450	1105	1538	1625	0		medium	3	3	26.9
	sp|Q60737|CSK21_MOUSE Casein kinase II subunit alpha OS=Mus musculus OX=10090 GN=Csnk2a1 PE=1 SV=2	Q60737	Casein kinase II subunit alpha	Csnk2a1	30086	35021	32874	646132	483590	625437	482041	460815		43479	51146	48145	617437	665091	851786	409012	562619	408574		high	19	19	58.1
	sp|O54833|CSK22_MOUSE Casein kinase II subunit alpha OS=Mus musculus OX=10090 GN=Csnk2a2 PE=1 SV=1	O54833	Casein kinase II subunit alpha	Csnk2a2	7212	13604	15176	106915	87801	106416	84587	91315		10256	14713	13067	172149	178985	311717	111637	157231	163241		high	18	18	67.1
	sp|P67871|CSK2B_MOUSE Casein kinase II subunit beta OS=Mus musculus OX=10090 GN=Csnk2b PE=1 SV=1	P67871	Casein kinase II subunit beta	Csnk2b	15678	17676	21341	612332	712570	437765	484835	516992		39431	30016	32502	654735	651645	825444	750427	643032	661578		high	9	9	49.3
	sp|Q99388|CSPRS_MOUSE Component of Sp100-rs OS=Mus musculus OX=10090 GN=Csprs PE=2 SV=1	Q99388	Component of Sp100-rs	Csprs	5077	8638	5572	8037	5710	4843	0	10534		5569	6801	6234	4922	3952	7978	22883	5215	2540		low	2	2	35.1
	sp|P97315|CSRP1_MOUSE Cysteine and glycine-rich protein 1 OS=Mus musculus OX=10090 GN=Csrp1 PE=1 SV=3	P97315	Cysteine and glycine-rich protein 1	Csrp1	97520	100989	110529	437739	344409	495510	593192	582910		101114	105691	123417	318470	302454	411182	410220	424902	357394		high	13	13	72.5
	sp|Q8CID0|CSR2B_MOUSE Cysteine-rich protein 2-binding protein OS=Mus musculus OX=10090 GN=Kat14 PE=1 SV=2	Q8CID0	Cysteine-rich protein 2-binding protein	Csrp2bp	292	80	118	785	940	1212	0	762		0	62	120	517	575	708	202	495	1822		high	10	10	14.5
	sp|P21460|CYTC_MOUSE Cystatin-C OS=Mus musculus OX=10090 GN=Cst3 PE=1 SV=2	P21460	Cystatin-C	Cst3	194	263	803	4370	0	0	1446	0		955	1310	2028	0	0	0	0	0	0		low	2	2	20
	sp|O89098|CYTF_MOUSE Cystatin-F OS=Mus musculus OX=10090 GN=Cst7 PE=2 SV=1	O89098	Cystatin-F	Cst7	0	0	0	0	0	0	0	0		5862	5182	4441	6080	4052	4518	4053	10178	2831		medium	4	4	38.9
	sp|Q62426|CYTB_MOUSE Cystatin-B OS=Mus musculus OX=10090 GN=Cstb PE=1 SV=1	Q62426	Cystatin-B	Cstb	29105	33486	55499	119470	14004	20060	46035	53658		31110	83317	62424	143648	68622	38332	52698	90782	0		medium	6	6	67.3
	sp|Q99LC2|CSTF1_MOUSE Cleavage stimulation factor subunit 1 OS=Mus musculus OX=10090 GN=Cstf1 PE=1 SV=1	Q99LC2	Cleavage stimulation factor subunit 1	Cstf1	11591	11139	20146	112237	90494	83656	93287	66697		16787	29024	19660	111605	110322	128609	107817	79782	85294		high	19	19	63.8
	sp|Q8BIQ5|CSTF2_MOUSE Cleavage stimulation factor subunit 2 OS=Mus musculus OX=10090 GN=Cstf2 PE=1 SV=2;sp|Q8BIQ5-2|CSTF2_MOUSE Isoform 2 of Cleavage stimulation factor subunit 2 OS=Mus musculus OX=10090 GN=Cstf2	Q8BIQ5;Q8BIQ5-2	Cleavage stimulation factor subunit 2	Cstf2	1182	2086	3856	73772	43473	33875	79103	41215		1610	4291	3044	51339	57562	54674	36959	56542	30127		medium	21	13	54.7
	sp|Q8C7E9|CSTFT_MOUSE Cleavage stimulation factor subunit 2 tau variant OS=Mus musculus OX=10090 GN=Cstf2t PE=1 SV=2	Q8C7E9	Cleavage stimulation factor subunit 2 tau variant	Cstf2t	45	457	615	13683	5898	8230	11830	3958		778	544	540	5608	3492	5482	9386	4452	2797		high	12	12	44.6
	sp|Q99LI7|CSTF3_MOUSE Cleavage stimulation factor subunit 3 OS=Mus musculus OX=10090 GN=Cstf3 PE=1 SV=1	Q99LI7	Cleavage stimulation factor subunit 3	Cstf3	3375	7746	9810	46131	48534	44519	50222	53147		6879	11157	11005	72399	84209	68210	46372	60563	46864		high	35	35	55.8
	sp|O88712|CTBP1_MOUSE C-terminal-binding protein 1 OS=Mus musculus OX=10090 GN=Ctbp1 PE=1 SV=2;sp|O88712-2|CTBP1_MOUSE Isoform 2 of C-terminal-binding protein 1 OS=Mus musculus OX=10090 GN=Ctbp1;sp|O88712-3|CTBP1_MOUSE Isoform 3 of C-terminal-binding prote	O88712;O88712-2;O88712-3;P56546;P56546-2	C-terminal-binding protein 1	Ctbp1	9303	14848	23019	149855	148900	125520	90715	118070		30260	24257	23337	132462	116391	108939	179465	125135	59592		high	23	23	52.4
	sp|Q8R242|DIAC_MOUSE Di-N-acetylchitobiase OS=Mus musculus OX=10090 GN=Ctbs PE=1 SV=2;sp|Q8R242-2|DIAC_MOUSE Isoform 2 of Di-N-acetylchitobiase OS=Mus musculus OX=10090 GN=Ctbs	Q8R242;Q8R242-2	Di-N-acetylchitobiase	Ctbs	0	0	0	0	87	0	0	0		227	50	314	917	1589	0	0	540	590		medium	4	4	13.1
	sp|Q5SUQ9|CTC1_MOUSE CST complex subunit CTC1 OS=Mus musculus OX=10090 GN=Ctc1 PE=1 SV=2;sp|Q5SUQ9-3|CTC1_MOUSE Isoform 3 of CST complex subunit CTC1 OS=Mus musculus OX=10090 GN=Ctc1	Q5SUQ9;Q5SUQ9-3	CST complex subunit CTC1	Ctc1	558	9783	632	1884	1763	1358	756	1179		1300	904	957	5136	4433	4214	5362	4891	4086		low	23	1	23.9
	sp|Q5SUQ9-2|CTC1_MOUSE Isoform 2 of CST complex subunit CTC1 OS=Mus musculus OX=10090 GN=Ctc1	Q5SUQ9-2	CST complex subunit CTC1	Ctc1	83	104	105	588	464	360	513	419		238	126	96	735	527	445	917	485	350		low	1	1	23.9
	sp|Q61164|CTCF_MOUSE Transcriptional repressor CTCF OS=Mus musculus OX=10090 GN=Ctcf PE=1 SV=2	Q61164;A2APF3;A2APF3-2	Transcriptional repressor CTCF	Ctcf	17821	16636	18629	76490	58589	48129	54245	43197		15993	21992	22378	69022	62079	48459	49396	56115	64468		high	25	25	44.2
	sp|Q3TP92|CNEP1_MOUSE CTD nuclear envelope phosphatase 1 OS=Mus musculus OX=10090 GN=Ctdnep1 PE=1 SV=2	Q3TP92	CTD nuclear envelope phosphatase 1	Ctdnep1	680	0	174	0	0	1009	4792	0		483	567	1369	0	2443	3960	0	2462	0		medium	4	4	22.1
	sp|Q7TSG2|CTDP1_MOUSE RNA polymerase II subunit A C-terminal domain phosphatase OS=Mus musculus OX=10090 GN=Ctdp1 PE=1 SV=1	Q7TSG2;Q7TSG2-2	RNA polymerase II subunit A C-terminal domain phosphatase	Ctdp1	5877	8729	6154	40428	32535	28395	25559	34901		6543	9402	10330	39231	39133	41753	35472	34828	31051		high	40	40	58.6
	sp|P58466|CTDS1_MOUSE Carboxy-terminal domain RNA polymerase II polypeptide A small phosphatase 1 OS=Mus musculus OX=10090 GN=Ctdsp1 PE=1 SV=1	P58466;P58465	Carboxy-terminal domain RNA polymerase II polypeptide A small phosphatase 1	Ctdsp1	1273	1786	1662	2400	4475	4151	2088	5346		2981	6066	4917	5250	3295	6076	2695	2386	0		high	8	8	39.1
	sp|Q8BG15|CTSL2_MOUSE CTD small phosphatase-like protein 2 OS=Mus musculus OX=10090 GN=Ctdspl2 PE=1 SV=1;sp|Q8BG15-6|CTSL2_MOUSE Isoform 6 of CTD small phosphatase-like protein 2 OS=Mus musculus OX=10090 GN=Ctdspl2;sp|Q8BG15-2|CTSL2_MOUSE Isoform 2 of CTD	Q8BG15;Q8BG15-6;Q8BG15-2;Q8BG15-3;Q8BG15-5;Q8BG15-4	CTD small phosphatase-like protein 2	Ctdspl2	5769	7801	5701	28533	20867	23469	20910	22181		3813	6652	5918	35597	23833	22851	20065	24599	24630		high	13	13	32
	sp|Q8VCN5|CGL_MOUSE Cystathionine gamma-lyase OS=Mus musculus OX=10090 GN=Cth PE=1 SV=1	Q8VCN5	Cystathionine gamma-lyase	Cth	0	0	0	0	0	0	0	0		0	0	0	361	2739	987	0	562	0		medium	6	6	21.4
[truncated: 6,074 more rows]

## Sheet: fold change + q val
					CD4 TCR Pim dKO / CD4 TCR WT			CD8 TCR Pim dKO / CD4 TCR WT
	Fasta headers	Protein_IDs (uniprot)	Protein names	Gene names	log2(fold-change)	q value	-log10(p-value)	log2(fold-change)	q value	-log10(p-value)
[truncated: 7,427 more rows]

## Sheet: protein content per cell
	CD4 naïve WT			CD4 TCR WT			CD4 TCR Pim dKO			CD8 naïve WT			CD8 TCR WT			CD8 TCR Pim dKO
[truncated: 2 more rows]
