# Supplementary material for: PIM kinase control of CD8 T cell protein synthesis and cell trafficking
Source: eLife. 2025 May 13;13:RP98622. doi: 10.7554/eLife.98622 (PMC12074636; doi:10.7554/eLife.98622)
Supplement: Supplementary file 2. [file elife-98622-supp2.xlsx]

## Sheet: A. TPM, DE analysis
Day 6, IL15 expanded CD8 T cells, RNAseq				mRNA expression - Transcript Per Million (TPM)							DE analysis
				WT			Pim dKO				Pim dKO / WT
	ensembl_gene_id	description	mgi_symbol	BR1	BR2	BR3	BR1	BR2	BR3		Fold-change (log2)	q-value	p-value (unadjusted)
	ENSMUSG00000031155	proviral integration site 2 [Source:MGI Symbol;Acc:MGI:97587]	Pim2	151.742	148.773	141.508	5.29267	5.31451	4.50432		-4.94814	5.5824e-15	7.31837e-19
	ENSMUSG00000117786	predicted gene 10503 [Source:MGI Symbol;Acc:MGI:3642784]	Gm10503	0	0	0	5.90211	2.33582	2.26367		7.36658	9.8604e-06	2.58534e-09
	ENSMUSG00000033826	dynein, axonemal, heavy chain 8 [Source:MGI Symbol;Acc:MGI:107714]	Dnah8	6.64327	6.35109	6.38343	33.2557	18.6971	17.2906		1.57387	2.56463e-05	1.00865e-08
	ENSMUSG00000020120	pleckstrin [Source:MGI Symbol;Acc:MGI:1860485]	Plek	85.2497	82.5066	72.0498	55.7616	61.3395	54.0784		-0.540945	3.77427e-05	1.97918e-08
	ENSMUSG00000024026	glyoxalase 1 [Source:MGI Symbol;Acc:MGI:95742]	Glo1	7.52548	8.15467	7.41799	20.837	14.26	13.4796		0.915558	0.000125548	8.22951e-08
	ENSMUSG00000097125	predicted gene, 26885 [Source:MGI Symbol;Acc:MGI:5477379]	Gm26885	0.0351927	0.0688191	0.0767182	2.06721	1.16204	1.00906		4.23412	0.00013726	1.07966e-07
	ENSMUSG00000078249	high mobility group AT-hook 1B [Source:MGI Symbol;Acc:MGI:96161]	Hmga1b	0.859428	0.746937	1.12411	42.7528	21.0566	22.4201		4.7761	0.000151352	1.38892e-07
	ENSMUSG00000075391	glyoxalase 1, pseudogene [Source:MGI Symbol;Acc:MGI:3649615]	Glo1-ps	2.72772	3.00894	2.01259	36.6744	16.1344	19.9224		2.91543	0.000152206	1.5963e-07
	ENSMUSG00000078763	schlafen 1 [Source:MGI Symbol;Acc:MGI:1313259]	Slfn1	435.01	436.875	357.638	250.497	311.862	272.982		-0.592452	0.000168293	1.98564e-07
	ENSMUSG00000040276	protein kinase C and casein kinase substrate in neurons 1 [Source:MGI Symbol;Acc:MGI:1345181]	Pacsin1	7.42441	5.0954	5.46238	19.1768	11.5116	15.771		1.33663	0.000168496	2.20893e-07
	ENSMUSG00000043931	GTPase, IMAP family member 7 [Source:MGI Symbol;Acc:MGI:1349657]	Gimap7	244.275	254.918	217.37	164.949	199.096	158.538		-0.537314	0.000181865	2.86103e-07
	ENSMUSG00000023991	forkhead box P4 [Source:MGI Symbol;Acc:MGI:1921373]	Foxp4	26.5245	26.8126	26.7363	41.6363	33.3623	39.3362		0.551885	0.000181865	2.66619e-07
	ENSMUSG00000024675	membrane-spanning 4-domains, subfamily A, member 4C [Source:MGI Symbol;Acc:MGI:1927656]	Ms4a4c	48.6161	46.2121	46.8576	18.9293	37.0613	22.5701		-0.956047	0.000423778	7.59281e-07
	ENSMUSG00000043263	interferon activated gene 209 [Source:MGI Symbol;Acc:MGI:2138243]	Ifi209	256.018	277.307	198.88	118.313	175.887	153.517		-0.721995	0.000423778	8.3334e-07
	ENSMUSG00000027346	glycerophosphocholine phosphodiesterase 1 [Source:MGI Symbol;Acc:MGI:104898]	Gpcpd1	46.7472	44.2594	41.8492	31.0986	36.3638	31.6604		-0.452472	0.000423778	8.30822e-07
	ENSMUSG00000100150	predicted gene, 19585 [Source:MGI Symbol;Acc:MGI:5011770]	Gm19585	99.0488	97.632	94.1928	58.0615	77.2492	64.4704		-0.551613	0.000492095	1.03219e-06
	ENSMUSG00000079339	interferon induced protein with tetratricpeptide repeats 1B like 1 [Source:MGI Symbol;Acc:MGI:3650685]	Ifit1bl1	45.5505	53.6726	41.5612	12.8451	24.2393	24.8498		-1.04485	0.000555913	1.29239e-06
	ENSMUSG00000073491	interferon activated gene 213 [Source:MGI Symbol;Acc:MGI:3695276]	Ifi213	18.9491	18.5995	14.6972	9.15498	11.9672	11.8597		-0.62844	0.000555913	1.31181e-06
	ENSMUSG00000037692	AT hook, DNA binding motif, containing 1 [Source:MGI Symbol;Acc:MGI:2444218]	Ahdc1	13.1154	10.5357	13.2883	18.3093	16.5058	17.9432		0.571624	0.000606757	1.51134e-06
	ENSMUSG00000064373	selenoprotein P [Source:MGI Symbol;Acc:MGI:894288]	Selenop	75.8048	84.668	69.3873	44.3416	62.1634	51.9638		-0.548483	0.000646244	1.73518e-06
	ENSMUSG00000011257	poly(A) binding protein, cytoplasmic 4 [Source:MGI Symbol;Acc:MGI:2385206]	Pabpc4	88.4021	83.8054	89.3902	110.701	102.837	108.17		0.33352	0.000646244	1.77913e-06
	ENSMUSG00000075010	expressed sequence AW112010 [Source:MGI Symbol;Acc:MGI:2147706]	AW112010	1993.45	1986.06	1749.36	1108.94	1581.27	1282.92		-0.557859	0.000669066	1.98316e-06
	ENSMUSG00000013858	transmembrane protein 259 [Source:MGI Symbol;Acc:MGI:2177957]	Tmem259	60.3615	58.4079	60.8873	80.0262	67.9803	81.0201		0.418044	0.000669066	2.01739e-06
	ENSMUSG00000070501	interferon activated gene 214 [Source:MGI Symbol;Acc:MGI:3584522]	Ifi214	25.2814	28.1832	20.7673	10.4819	17.166	15.0566		-0.773867	0.000746718	3.01817e-06
	ENSMUSG00000073008	G protein-coupled receptor 174 [Source:MGI Symbol;Acc:MGI:2685222]	Gpr174	42.3385	43.3636	35.6213	30.6787	32.7433	28.2907		-0.482093	0.000746718	2.9453e-06
	ENSMUSG00000079363	guanylate binding protein 4 [Source:MGI Symbol;Acc:MGI:97072]	Gbp4	209.705	201.63	168.224	123.975	160.088	144.856		-0.443684	0.000746718	2.83045e-06
	ENSMUSG00000028381	UDP-glucose ceramide glucosyltransferase [Source:MGI Symbol;Acc:MGI:1332243]	Ugcg	353.044	334.447	269.603	225.61	265.876	237.769		-0.439137	0.000746718	2.91242e-06
	ENSMUSG00000063897	NA	NA	34.2444	32.2074	39.0195	52.5673	44.1657	52.3946		0.593888	0.000746718	2.54764e-06
	ENSMUSG00000095742			126.996	117.453	305.05	373.499	394.079	396.902		1.47711	0.000746718	2.77696e-06
	ENSMUSG00000046229	SCAN domain-containing 1 [Source:MGI Symbol;Acc:MGI:1343132]	Scand1	12.4719	8.12956	24.7854	36.8444	30.8303	36.8096		1.58649	0.000746718	3.03467e-06
	ENSMUSG00000076258	NA	NA	2302.49	1803.13	3311.77	8864.89	4250.88	9088.31		1.85781	0.000746718	2.83636e-06
	ENSMUSG00000019261	microtubule-associated protein 1S [Source:MGI Symbol;Acc:MGI:2443304]	Map1s	15.3115	13.6315	18.1589	25.8405	20.3869	23.4127		0.640599	0.00078061	3.27474e-06
	ENSMUSG00000002968	mediator complex subunit 25 [Source:MGI Symbol;Acc:MGI:1922863]	Med25	25.6443	24.198	26.9001	34.5093	29.5648	33.435		0.401244	0.000802801	3.47308e-06
	ENSMUSG00000029298	guanylate-binding protein 9 [Source:MGI Symbol;Acc:MGI:3605620]	Gbp9	59.9934	63.9777	48.1908	44.0775	44.5789	42.0291		-0.455195	0.000807365	3.61073e-06
	ENSMUSG00000017493	insulin-like growth factor binding protein 4 [Source:MGI Symbol;Acc:MGI:96439]	Igfbp4	14.4775	14.1983	14.1417	76.5936	34.615	34.9297		1.44771	0.000807365	3.76215e-06
	ENSMUSG00000095762	predicted gene 16378 [Source:MGI Symbol;Acc:MGI:3646886]	Gm16378	18.3872	16.4244	44.5369	55.9381	59.4507	62.7398		1.58949	0.000807365	3.81035e-06
	ENSMUSG00000031822	genetic suppressor element 1, coiled-coil protein [Source:MGI Symbol;Acc:MGI:1098275]	Gse1	35.3036	33.0734	33.9527	42.9494	39.896	41.6386		0.301914	0.000881874	4.27761e-06
	ENSMUSG00000037992	retinoic acid receptor, alpha [Source:MGI Symbol;Acc:MGI:97856]	Rara	44.9269	41.4578	45.061	56.1097	53.6273	55.8784		0.371274	0.000971938	4.84189e-06
	ENSMUSG00000074406	zinc finger protein 628 [Source:MGI Symbol;Acc:MGI:2665174]	Zfp628	16.5936	13.8758	16.4292	20.8686	20.3041	23.3368		0.55445	0.00105507	5.39435e-06
	ENSMUSG00000049103	chemokine (C-C motif) receptor 2 [Source:MGI Symbol;Acc:MGI:106185]	Ccr2	172.543	149.142	132.759	34.5359	117.285	66.2839		-1.19143	0.00108438	5.83931e-06
	ENSMUSG00000026104	signal transducer and activator of transcription 1 [Source:MGI Symbol;Acc:MGI:103063]	Stat1	87.0485	84.4864	66.0859	56.6069	67.3604	58.7665		-0.439499	0.00108438	5.68836e-06
	ENSMUSG00000070031	Sp140 nuclear body protein [Source:MGI Symbol;Acc:MGI:3702467]	Sp140	52.6626	54.1023	45.3715	40.8073	39.7271	40.1319		-0.349684	0.00108438	5.97069e-06
	ENSMUSG00000034168	interferon regulatory factor 2 binding protein-like [Source:MGI Symbol;Acc:MGI:2442463]	Irf2bpl	51.7188	43.2328	61.1297	81.2887	64.9877	81.4514		0.682541	0.00112841	6.36102e-06
	ENSMUSG00000070003	single stranded DNA binding protein 4 [Source:MGI Symbol;Acc:MGI:1924150]	Ssbp4	77.954	74.2281	94.8687	102.543	105.248	111.239		0.489493	0.00118644	6.84371e-06
	ENSMUSG00000022014	epithelial stromal interaction 1 (breast) [Source:MGI Symbol;Acc:MGI:1915168]	Epsti1	713.015	694.973	653.584	372.062	556.878	501.857		-0.478569	0.00119283	7.03695e-06
	ENSMUSG00000027889	adenosine monophosphate deaminase 2 [Source:MGI Symbol;Acc:MGI:88016]	Ampd2	43.8703	41.3248	47.351	58.2104	50.375	56.0575		0.372196	0.00131725	8.11631e-06
	ENSMUSG00000006585	chromatin licensing and DNA replication factor 1 [Source:MGI Symbol;Acc:MGI:1914427]	Cdt1	90.7514	80.984	103.096	133.152	121.452	132.415		0.582726	0.00131725	8.08108e-06
	ENSMUSG00000035011	zinc finger and BTB domain containing 7a [Source:MGI Symbol;Acc:MGI:1335091]	Zbtb7a	58.5342	55.2135	62.6448	75.1525	68.7825	74.4195		0.369999	0.00132145	8.31545e-06
	ENSMUSG00000047735	sterile alpha motif domain containing 9-like [Source:MGI Symbol;Acc:MGI:1343184]	Samd9l	179.303	169.942	146.226	141.763	139.202	135.961		-0.287031	0.00133308	8.62199e-06
	ENSMUSG00000011877	GIT ArfGAP 1 [Source:MGI Symbol;Acc:MGI:1927140]	Git1	62.7515	60.0293	60.2171	83.1089	67.6335	76.3697		0.325587	0.00133308	8.73813e-06
	ENSMUSG00000068758	interleukin 3 receptor, alpha chain [Source:MGI Symbol;Acc:MGI:96553]	Il3ra	13.7765	12.8431	18.8577	22.9424	20.5938	22.0646		0.649976	0.00139879	9.53565e-06
	ENSMUSG00000045045	leucine rich repeat and fibronectin type III domain containing 4 [Source:MGI Symbol;Acc:MGI:2385612]	Lrfn4	2.21419	2.07471	3.1676	4.85745	4.66335	4.6834		1.0469	0.00139879	9.40648e-06
	ENSMUSG00000062115	retinoic acid induced 1 [Source:MGI Symbol;Acc:MGI:103291]	Rai1	37.7005	35.3301	37.6172	47.1297	42.9586	46.3649		0.342915	0.00141561	1.01103e-05
	ENSMUSG00000032300	RIKEN cDNA 1700017B05 gene [Source:MGI Symbol;Acc:MGI:1921461]	1700017B05Rik	143.725	132.182	147.031	169.675	162.882	178.171		0.346463	0.00141561	1.02357e-05
	ENSMUSG00000021144	metastasis associated 1 [Source:MGI Symbol;Acc:MGI:2150037]	Mta1	142.452	135.773	137.562	184.218	150.691	178.707		0.348854	0.00141561	1.03926e-05
	ENSMUSG00000049295	zinc finger protein 219 [Source:MGI Symbol;Acc:MGI:1917140]	Zfp219	6.39085	5.40876	6.60633	12.0849	8.55559	9.71438		0.711186	0.00141561	1.01423e-05
	ENSMUSG00000048521	chemokine (C-X-C motif) receptor 6 [Source:MGI Symbol;Acc:MGI:1934582]	Cxcr6	743.825	720.472	722.221	412.762	657.402	465.451		-0.565152	0.00149616	1.13762e-05
	ENSMUSG00000051354	sterile alpha motif domain containing 3 [Source:MGI Symbol;Acc:MGI:2685469]	Samd3	55.0274	58.705	54.6611	39.3961	48.7784	38.8626		-0.455208	0.00149616	1.11936e-05
	ENSMUSG00000024679	membrane-spanning 4-domains, subfamily A, member 6D [Source:MGI Symbol;Acc:MGI:1916024]	Ms4a6d	19.1291	18.2878	14.5147	7.2441	11.6581	10.4111		-0.800816	0.00151406	1.21171e-05
	ENSMUSG00000007892	ribosomal protein, large, P1 [Source:MGI Symbol;Acc:MGI:1927099]	Rplp1	6483.54	6186.99	8057.2	9306.85	8521.57	8804.47		0.447882	0.00151406	1.23063e-05
	ENSMUSG00000018476	KDM1 lysine (K)-specific demethylase 6B [Source:MGI Symbol;Acc:MGI:2448492]	Kdm6b	16.6791	16.4608	18.1944	28.2623	21.2847	24.7632		0.564697	0.00151406	1.22559e-05
	ENSMUSG00000034686	proline rich 7 (synaptic) [Source:MGI Symbol;Acc:MGI:3487246]	Prr7	2.5707	2.01079	4.93151	9.9031	7.20924	8.4583		1.68009	0.00151406	1.20426e-05
	ENSMUSG00000054072	interferon inducible GTPase 1 [Source:MGI Symbol;Acc:MGI:1926259]	Iigp1	85.9545	84.4459	61.5927	37.3045	64.913	46.3241		-0.741238	0.00154319	1.32434e-05
	ENSMUSG00000031428	zinc finger, CCHC domain containing 18 [Source:MGI Symbol;Acc:MGI:1914245]	Zcchc18	9.81583	9.90097	7.95527	6.0905	7.32423	6.24158		-0.548516	0.00154319	1.30888e-05
	ENSMUSG00000060601	nuclear receptor subfamily 1, group H, member 2 [Source:MGI Symbol;Acc:MGI:1352463]	Nr1h2	76.6976	72.5126	79.11	99.619	83.267	100.303		0.386693	0.00154319	1.27537e-05
	ENSMUSG00000035890	ring finger protein 126 [Source:MGI Symbol;Acc:MGI:1917544]	Rnf126	95.9503	84.2822	114.356	124.998	131.376	137.935		0.546002	0.00154319	1.34882e-05
	ENSMUSG00000090958	leucine rich repeat containing 32 [Source:MGI Symbol;Acc:MGI:93882]	Lrrc32	9.51393	10.5571	10.7652	20.9972	15.528	15.2956		0.682206	0.00154319	1.35546e-05
	ENSMUSG00000042570	MIER family member 2 [Source:MGI Symbol;Acc:MGI:1917677]	Mier2	14.6051	14.9891	13.9321	19.6135	17.1715	19.6942		0.415228	0.00162282	1.44668e-05
	ENSMUSG00000038179	SLAM family member 7 [Source:MGI Symbol;Acc:MGI:1922595]	Slamf7	53.7356	50.4502	41.798	30.7165	43.5478	33.5814		-0.514442	0.00166833	1.53099e-05
	ENSMUSG00000046574	proline rich 12 [Source:MGI Symbol;Acc:MGI:2679002]	Prr12	43.1936	36.1947	43.741	53.5153	54.646	53.8459		0.44061	0.00166833	1.51142e-05
	ENSMUSG00000022901	CD86 antigen [Source:MGI Symbol;Acc:MGI:101773]	Cd86	14.2822	14.9285	11.9545	1.9444	6.21556	6.87767		-1.26513	0.00172691	1.87906e-05
	ENSMUSG00000035235	tripartite motif-containing 13 [Source:MGI Symbol;Acc:MGI:1913847]	Trim13	32.7479	31.099	29.7248	19.8858	25.2197	21.6295		-0.502259	0.00172691	1.75772e-05
	ENSMUSG00000044827	toll-like receptor 1 [Source:MGI Symbol;Acc:MGI:1341295]	Tlr1	42.5995	45.5082	31.835	29.2192	28.0844	29.1518		-0.501745	0.00172691	1.86755e-05
	ENSMUSG00000045932	interferon-induced protein with tetratricopeptide repeats 2 [Source:MGI Symbol;Acc:MGI:99449]	Ifit2	48.4552	51.4168	36.6407	30.306	38.0401	32.3099		-0.501699	0.00172691	1.77864e-05
	ENSMUSG00000037849	interferon activated gene 206 [Source:MGI Symbol;Acc:MGI:3646410]	Ifi206	178.416	169.611	127.113	107.511	131.357	113.919		-0.49578	0.00172691	1.65887e-05
	ENSMUSG00000026012	CD28 antigen [Source:MGI Symbol;Acc:MGI:88327]	Cd28	225.429	221.721	185.556	163.786	181.614	165.464		-0.350537	0.00172691	1.7747e-05
	ENSMUSG00000000282	max binding protein [Source:MGI Symbol;Acc:MGI:109150]	Mnt	45.227	42.0961	41.0829	66.346	49.9532	55.5772		0.387291	0.00172691	1.62494e-05
	ENSMUSG00000044700	transmembrane protein 201 [Source:MGI Symbol;Acc:MGI:1196277]	Tmem201	11.7312	10.5917	11.8642	15.7064	12.8269	15.251		0.414787	0.00172691	1.73866e-05
	ENSMUSG00000049577	zinc finger protein, multitype 1 [Source:MGI Symbol;Acc:MGI:1095400]	Zfpm1	54.7191	49.796	58.0915	72.6476	72.718	71.3475		0.451295	0.00172691	1.87873e-05
	ENSMUSG00000032997	chondroitin polymerizing factor [Source:MGI Symbol;Acc:MGI:106576]	Chpf	17.939	17.5989	19.2502	26.9122	23.4137	26.9144		0.564753	0.00172691	1.67049e-05
	ENSMUSG00000038034	immunoglobulin superfamily, member 8 [Source:MGI Symbol;Acc:MGI:2154090]	Igsf8	7.25457	7.24591	8.71992	12.664	9.18791	12.4436		0.681844	0.00172691	1.6766e-05
	ENSMUSG00000020308	tubulin polyglutamylase complex subunit 1 [Source:MGI Symbol;Acc:MGI:106618]	Tpgs1	16.2801	15.0515	21.8009	26.1801	27.8774	29.594		0.813965	0.00172691	1.87437e-05
	ENSMUSG00000033467	cytokine receptor-like factor 2 [Source:MGI Symbol;Acc:MGI:1889506]	Crlf2	44.6336	35.8466	58.753	81.9871	69.6917	75.0578		0.817511	0.00172691	1.86269e-05
	ENSMUSG00000025362	ribosomal protein S26 [Source:MGI Symbol;Acc:MGI:1351628]	Rps26	1418.02	1347.55	1573.67	1818.37	1629.41	1779.88		0.341075	0.00180788	2.03827e-05
	ENSMUSG00000003072	ATP synthase, H+ transporting, mitochondrial F1 complex, delta subunit [Source:MGI Symbol;Acc:MGI:1913293]	Atp5d	282.373	262.054	303.316	340.138	335.824	360.619		0.375499	0.00180788	2.0344e-05
	ENSMUSG00000007603	dihydrouridine synthase 3-like (S. cerevisiae) [Source:MGI Symbol;Acc:MGI:2147092]	Dus3l	45.5684	45.07	49.9443	67.5515	51.7078	61.8397		0.418281	0.00180788	2.00582e-05
	ENSMUSG00000007950	abhydrolase domain containing 8 [Source:MGI Symbol;Acc:MGI:1918946]	Abhd8	37.9706	36.1393	38.9846	58.2442	42.5886	52.4426		0.476154	0.0018397	2.09826e-05
	ENSMUSG00000028270	guanylate binding protein 2 [Source:MGI Symbol;Acc:MGI:102772]	Gbp2	371.111	416.767	288.771	194.822	303.901	243.098		-0.588005	0.00187347	2.19234e-05
	ENSMUSG00000034028	CD226 antigen [Source:MGI Symbol;Acc:MGI:3039602]	Cd226	161.262	160.444	140.846	102.766	130.161	116.234		-0.411814	0.00187347	2.21045e-05
	ENSMUSG00000024066	xanthine dehydrogenase [Source:MGI Symbol;Acc:MGI:98973]	Xdh	25.6386	24.34	21.0172	14.5351	19.6573	18.375		-0.409324	0.00187347	2.17906e-05
	ENSMUSG00000055148	Kruppel-like factor 2 (lung) [Source:MGI Symbol;Acc:MGI:1342772]	Klf2	141.735	120.745	149.65	294.173	169.23	214.444		0.696543	0.00189334	2.25872e-05
	ENSMUSG00000021136	SPARC related modular calcium binding 1 [Source:MGI Symbol;Acc:MGI:1929878]	Smoc1	1.76544	1.56331	1.97512	0.254521	0.753346	0.375771		-2.02933	0.00189786	2.28899e-05
	ENSMUSG00000104713	guanylate binding protein 6 [Source:MGI Symbol;Acc:MGI:2140937]	Gbp6	34.5994	34.7537	25.9062	20.8291	27.3544	23.1857		-0.469251	0.00189789	2.38855e-05
	ENSMUSG00000046879	immunity-related GTPase family M member 1 [Source:MGI Symbol;Acc:MGI:107567]	Irgm1	119.158	117.637	88.4885	80.2893	97.1703	80.9848		-0.418788	0.00189789	2.36065e-05
	ENSMUSG00000033128	golgi associated, gamma adaptin ear containing, ARF binding protein 1 [Source:MGI Symbol;Acc:MGI:2146207]	Gga1	58.9531	56.2501	57.4473	74.8004	65.5592	71.471		0.31901	0.00189789	2.32815e-05
	ENSMUSG00000020211	splicing factor 3a, subunit 2 [Source:MGI Symbol;Acc:MGI:104912]	Sf3a2	153.036	133.081	146.891	173.576	168.961	185.917		0.357248	0.00189789	2.37737e-05
	ENSMUSG00000020589	CYFIP related Rac1 interactor A [Source:MGI Symbol;Acc:MGI:1261783]	Cyria	22.8726	21.8635	17.1148	15.8768	16.5265	16.0614		-0.391259	0.00203559	2.60968e-05
	ENSMUSG00000038406	SR-related CTD-associated factor 1 [Source:MGI Symbol;Acc:MGI:2141980]	Scaf1	60.5239	55.9129	60.1046	72.7563	66.4243	72.4969		0.309066	0.00203559	2.66345e-05
	ENSMUSG00000022791	tyrosine kinase, non-receptor, 2 [Source:MGI Symbol;Acc:MGI:1858308]	Tnk2	41.6176	39.9475	48.9807	51.9588	51.5589	55.3639		0.391029	0.00203559	2.6686e-05
	ENSMUSG00000048264	disco interacting protein 2 homolog C [Source:MGI Symbol;Acc:MGI:1920179]	Dip2c	4.03023	4.12951	4.27879	10.535	6.71617	6.46079		0.772301	0.00203559	2.66215e-05
	ENSMUSG00000078922	T cell specific GTPase 1 [Source:MGI Symbol;Acc:MGI:98734]	Tgtp1	79.3549	81.189	67.0097	53.4092	67.5805	56.9063		-0.400626	0.00206958	2.76742e-05
	ENSMUSG00000023908	protein kinase, membrane associated tyrosine/threonine 1 [Source:MGI Symbol;Acc:MGI:2137630]	Pkmyt1	54.2145	52.7997	52.4027	66.9858	58.9058	71.9112		0.389833	0.00206958	2.75233e-05
	ENSMUSG00000060131	ATPase, class I, type 8B, member 4 [Source:MGI Symbol;Acc:MGI:1859664]	Atp8b4	199.84	190.498	162.105	140.752	164.207	146.952		-0.327543	0.0020768	2.8043e-05
	ENSMUSG00000058446	zinc and ring finger 2 [Source:MGI Symbol;Acc:MGI:1196246]	Znrf2	151.505	136.771	123.017	112.991	120.376	112.133		-0.286531	0.00209733	2.85953e-05
	ENSMUSG00000022436	SH3-domain binding protein 1 [Source:MGI Symbol;Acc:MGI:104603]	Sh3bp1	42.6205	39.0958	41.5343	55.8464	44.6383	56.1929		0.415082	0.00214529	2.95304e-05
	ENSMUSG00000005442	capicua transcriptional repressor [Source:MGI Symbol;Acc:MGI:1918972]	Cic	49.1875	45.4825	46.8461	59.7836	55.345	57.0025		0.293243	0.00214994	2.98762e-05
	ENSMUSG00000078771	ecotropic viral integration site 2a [Source:MGI Symbol;Acc:MGI:95458]	Evi2a	28.0865	30.1383	28.1601	17.1414	22.2896	19.2546		-0.544987	0.00216162	3.06255e-05
	ENSMUSG00000038332	sestrin 1 [Source:MGI Symbol;Acc:MGI:2155278]	Sesn1	120.079	117.578	106.568	107.483	95.7973	90.3674		-0.303054	0.00216162	3.08886e-05
	ENSMUSG00000074405	zinc finger protein 865 [Source:MGI Symbol;Acc:MGI:2442656]	Zfp865	12.7566	12.2685	13.4533	18.0445	14.8557	16.6935		0.403557	0.00216162	3.03804e-05
	ENSMUSG00000079227	chemokine (C-C motif) receptor 5 [Source:MGI Symbol;Acc:MGI:107182]	Ccr5	188.127	158.439	146.633	69.1303	147.63	96.5723		-0.739032	0.00218934	3.15718e-05
	ENSMUSG00000041959	S100 calcium binding protein A10 (calpactin) [Source:MGI Symbol;Acc:MGI:1339468]	S100a10	1491.4	1475.31	1564.47	1034.99	1356.83	1140.54		-0.343009	0.0022337	3.27972e-05
	ENSMUSG00000025915	serum/glucocorticoid regulated kinase 3 [Source:MGI Symbol;Acc:MGI:2182368]	Sgk3	13.7764	13.2709	13.4318	9.32645	11.145	10.8396		-0.317439	0.0022337	3.27731e-05
	ENSMUSG00000023990	transcription factor EB [Source:MGI Symbol;Acc:MGI:103270]	Tfeb	11.1132	9.50684	12.1982	15.8137	14.2533	15.1785		0.52226	0.00225689	3.34335e-05
	ENSMUSG00000040584	ATP-binding cassette, sub-family B (MDR/TAP), member 1A [Source:MGI Symbol;Acc:MGI:97570]	Abcb1a	15.8741	19.0877	13.6195	9.1538	11.15	11.7066		-0.536592	0.0022627	3.51673e-05
	ENSMUSG00000007029	valyl-tRNA synthetase [Source:MGI Symbol;Acc:MGI:90675]	Vars	198.704	189.173	198.779	219.159	231.51	238.412		0.292364	0.0022627	3.49285e-05
	ENSMUSG00000020167	transcription factor 3 [Source:MGI Symbol;Acc:MGI:98510]	Tcf3	121.556	109.755	122.487	148.567	142.281	151.215		0.377365	0.0022627	3.52993e-05
	ENSMUSG00000069682	predicted pseudogene 10275 [Source:MGI Symbol;Acc:MGI:3704354]	Gm10275	65.2868	69.8109	72.9199	104.92	80.1308	99.6477		0.523407	0.0022627	3.46814e-05
	ENSMUSG00000055633	zinc finger protein 580 [Source:MGI Symbol;Acc:MGI:1916242]	Zfp580	13.0523	11.3439	14.6908	24.4909	18.9258	21.2335		0.762346	0.0022627	3.41026e-05
	ENSMUSG00000106106	NA	NA	2073.16	1148.34	1526.46	13126	2963.25	15474		2.90935	0.0022627	3.4524e-05
	ENSMUSG00000078853	interferon gamma induced GTPase [Source:MGI Symbol;Acc:MGI:107729]	Igtp	802.497	815.385	602.636	501.836	685.856	550.296		-0.432106	0.00226509	3.59305e-05
	ENSMUSG00000095098	coiled-coil domain containing 85B [Source:MGI Symbol;Acc:MGI:2147607]	Ccdc85b	5.73001	5.44151	7.58082	9.6718	9.29475	8.93907		0.644206	0.00226509	3.57618e-05
	ENSMUSG00000028268	guanylate binding protein 3 [Source:MGI Symbol;Acc:MGI:1926263]	Gbp3	128.116	136.052	97.0968	71.7091	103.831	86.6743		-0.504496	0.00226905	3.62911e-05
	ENSMUSG00000038644	polymerase (DNA directed), delta 1, catalytic subunit [Source:MGI Symbol;Acc:MGI:97741]	Pold1	97.7108	89.5455	98.0542	124.159	117.012	125.809		0.417122	0.00226905	3.65883e-05
	ENSMUSG00000062082	CD200 receptor 4 [Source:MGI Symbol;Acc:MGI:3036289]	Cd200r4	10.7057	15.8867	10.8744	5.05819	7.72723	6.26334		-0.946011	0.00229584	3.77452e-05
	ENSMUSG00000032185	coactivator-associated arginine methyltransferase 1 [Source:MGI Symbol;Acc:MGI:1913208]	Carm1	48.4339	46.4644	48.1142	63.0172	54.6498	57.3094		0.295192	0.00229584	3.80377e-05
	ENSMUSG00000032280	transducin-like enhancer of split 3 [Source:MGI Symbol;Acc:MGI:104634]	Tle3	39.1739	38.8103	41.5222	58.4238	43.0052	51.0123		0.378639	0.00229584	3.82242e-05
	ENSMUSG00000081051	predicted pseudogene 15427 [Source:MGI Symbol;Acc:MGI:3642341]	Gm15427	111.408	123.51	117.034	195.849	133.917	180.808		0.592779	0.00229584	3.73764e-05
	ENSMUSG00000024084	glutaminyl-peptide cyclotransferase (glutaminyl cyclase) [Source:MGI Symbol;Acc:MGI:1917786]	Qpct	10.228	9.32773	7.7188	3.41694	7.05362	4.91536		-0.891263	0.00231061	3.90759e-05
	ENSMUSG00000037936	scavenger receptor class B, member 1 [Source:MGI Symbol;Acc:MGI:893578]	Scarb1	18.2625	18.3964	19.0545	21.4862	22.1974	22.2684		0.286746	0.00231061	3.89435e-05
	ENSMUSG00000086564	CD101 antigen [Source:MGI Symbol;Acc:MGI:2685862]	Cd101	18.1848	16.458	13.2648	6.54662	12.0533	10.0598		-0.734999	0.00235729	4.10861e-05
	ENSMUSG00000052374	actinin alpha 2 [Source:MGI Symbol;Acc:MGI:109192]	Actn2	9.05231	10.7611	8.9102	3.86872	5.44089	6.20212		-0.728275	0.00235729	4.07997e-05
	ENSMUSG00000016496	CD274 antigen [Source:MGI Symbol;Acc:MGI:1926446]	Cd274	43.1794	45.2678	31.708	30.3399	34.3791	27.8673		-0.495523	0.00235729	4.19373e-05
	ENSMUSG00000024392	BCL2-associated athanogene 6 [Source:MGI Symbol;Acc:MGI:1919439]	Bag6	112.536	101.373	106.184	128.549	122.044	127.019		0.264168	0.00235729	4.1062e-05
	ENSMUSG00000025384	Fanconi anemia core complex associated protein 100 [Source:MGI Symbol;Acc:MGI:1919135]	Faap100	12.177	11.5929	11.8066	16.0052	14.9775	14.9341		0.362428	0.00235729	4.11211e-05
	ENSMUSG00000052837	jun B proto-oncogene [Source:MGI Symbol;Acc:MGI:96647]	Junb	54.0098	53.794	73.5901	113.808	89.3332	92.8325		0.758747	0.00235729	4.20285e-05
	ENSMUSG00000005533	insulin-like growth factor I receptor [Source:MGI Symbol;Acc:MGI:96433]	Igf1r	0.672735	0.714274	0.707562	2.15947	1.19207	1.27137		0.971937	0.00235729	4.16745e-05
	ENSMUSG00000041560	NOP53 ribosome biogenesis factor [Source:MGI Symbol;Acc:MGI:2154441]	Nop53	262.117	259.431	275.465	375.687	299.695	317.781		0.311903	0.00237053	4.25754e-05
	ENSMUSG00000043323	fibrosin-like 1 [Source:MGI Symbol;Acc:MGI:1920907]	Fbrsl1	15.9633	14.8179	16.4861	22.3148	17.9151	21.2388		0.433344	0.00238392	4.31284e-05
	ENSMUSG00000020644	inhibitor of DNA binding 2 [Source:MGI Symbol;Acc:MGI:96397]	Id2	463.47	425.119	395.389	198.819	391.187	263.314		-0.660667	0.00244749	4.52125e-05
	ENSMUSG00000056290	membrane-spanning 4-domains, subfamily A, member 4B [Source:MGI Symbol;Acc:MGI:1913083]	Ms4a4b	561.559	579.68	539.017	395.307	473.598	415.392		-0.399451	0.00244749	4.54166e-05
	ENSMUSG00000041164	zinc finger, MIZ-type containing 2 [Source:MGI Symbol;Acc:MGI:106374]	Zmiz2	123.807	115.516	112.931	145.251	131.736	140.424		0.255636	0.00244749	4.55619e-05
	ENSMUSG00000030678	MYC-associated zinc finger protein (purine-binding transcription factor) [Source:MGI Symbol;Acc:MGI:1338823]	Maz	382.658	354.133	370.554	451.294	408.896	443.858		0.27291	0.00244749	4.50767e-05
	ENSMUSG00000078921	T cell specific GTPase 2 [Source:MGI Symbol;Acc:MGI:3710083]	Tgtp2	104.244	110.735	88.8944	71.8538	88.4234	77.0197		-0.39132	0.00246182	4.61514e-05
	ENSMUSG00000040363	BCL6 interacting corepressor [Source:MGI Symbol;Acc:MGI:1918708]	Bcor	65.7112	62.1905	58.3885	81.3465	72.1486	73.3578		0.254338	0.00251826	4.75397e-05
	ENSMUSG00000112023	leukocyte immunoglobulin-like receptor, subfamily B, member 4B [Source:MGI Symbol;Acc:MGI:102702]	Lilr4b	28.8401	32.4341	25.8575	12.1267	19.582	19.5843		-0.662591	0.00254201	4.89028e-05
	ENSMUSG00000042312	S100 calcium binding protein A13 [Source:MGI Symbol;Acc:MGI:109581]	S100a13	462.227	496.424	483.578	346.433	426.401	375.735		-0.311133	0.00254201	4.89877e-05
	ENSMUSG00000070691	runt related transcription factor 3 [Source:MGI Symbol;Acc:MGI:102672]	Runx3	157.093	146.626	150.297	189.393	170.688	184.945		0.293323	0.00254201	4.85782e-05
	ENSMUSG00000056665	thioesterase superfamily member 6 [Source:MGI Symbol;Acc:MGI:1925301]	Them6	61.229	57.6965	64.3189	82.6711	81.1368	84.2537		0.489697	0.00261135	5.06663e-05
	ENSMUSG00000049422	coiled-coil-helix-coiled-coil-helix domain containing 10 [Source:MGI Symbol;Acc:MGI:2143558]	Chchd10	22.9208	19.4709	26.7561	33.2618	31.8385	36.9781		0.70125	0.00263838	5.15366e-05
	ENSMUSG00000004054	mitogen-activated protein kinase kinase kinase 11 [Source:MGI Symbol;Acc:MGI:1346880]	Map3k11	47.477	43.2671	46.2993	58.9929	52.3742	56.2699		0.31558	0.00269711	5.30374e-05
	ENSMUSG00000031807	6-phosphogluconolactonase [Source:MGI Symbol;Acc:MGI:1913421]	Pgls	39.2294	37.692	45.6545	53.3706	49.5163	48.9296		0.345771	0.0027219	5.38817e-05
	ENSMUSG00000040945	regulator of chromosome condensation 2 [Source:MGI Symbol;Acc:MGI:1919784]	Rcc2	295.321	281.744	295.37	344.893	337.849	337.039		0.246243	0.0027452	5.4703e-05
	ENSMUSG00000024424	tetratricopeptide repeat domain 39C [Source:MGI Symbol;Acc:MGI:1919997]	Ttc39c	12.9588	11.6894	10.219	5.5659	9.18918	7.8542		-0.61128	0.00277247	5.57499e-05
	ENSMUSG00000029050	ski sarcoma viral oncogene homolog (avian) [Source:MGI Symbol;Acc:MGI:98310]	Ski	217.621	195.159	204.786	259.767	222.174	285.004		0.412252	0.00277247	5.59732e-05
	ENSMUSG00000029725	protein phosphatase 1, regulatory subunit 35 [Source:MGI Symbol;Acc:MGI:1922853]	Ppp1r35	18.0314	18.0499	25.0819	31.3687	30.9733	31.5811		0.740412	0.00283614	5.76305e-05
	ENSMUSG00000024949	splicing factor 1 [Source:MGI Symbol;Acc:MGI:1095403]	Sf1	207.931	197.45	197.137	229.203	222.213	235.729		0.226613	0.00284374	5.86288e-05
	ENSMUSG00000030034	INO80 complex subunit B [Source:MGI Symbol;Acc:MGI:1917270]	Ino80b	22.5015	21.6198	28.6031	32.8653	30.4676	36.8807		0.626723	0.00284374	5.89033e-05
	ENSMUSG00000046999	RIKEN cDNA 1110032F04 gene [Source:MGI Symbol;Acc:MGI:1915975]	1110032F04Rik	17.7525	18.0199	18.9066	43.101	22.3119	28.8761		0.707603	0.00284374	5.82933e-05
	ENSMUSG00000030921	tripartite motif-containing 30A [Source:MGI Symbol;Acc:MGI:98178]	Trim30a	79.2025	77.8831	63.7029	60.1447	61.4508	61.8075		-0.283148	0.00288524	6.11308e-05
	ENSMUSG00000026222	nuclear antigen Sp100 [Source:MGI Symbol;Acc:MGI:109561]	Sp100	213.224	214.381	183.575	177.79	170.723	175.687		-0.232529	0.00288524	6.17e-05
	ENSMUSG00000031157	polyglutamine binding protein 1 [Source:MGI Symbol;Acc:MGI:1859638]	Pqbp1	124.781	119.986	123.206	164.799	150.874	147.817		0.31604	0.00288524	6.05854e-05
	ENSMUSG00000069565	DAZ associated protein 1 [Source:MGI Symbol;Acc:MGI:1917498]	Dazap1	170.723	152.588	181.531	192.152	196.311	212.367		0.352183	0.00288524	6.14196e-05
	ENSMUSG00000049600	zinc finger and BTB domain containing 45 [Source:MGI Symbol;Acc:MGI:2685003]	Zbtb45	22.1287	18.6433	21.6837	27.9517	26.5747	27.7977		0.436983	0.00288524	6.13858e-05
	ENSMUSG00000071076	jun D proto-oncogene [Source:MGI Symbol;Acc:MGI:96648]	Jund	168.465	132.155	213.681	236.521	276.128	254.981		0.709452	0.00288524	6.22331e-05
	ENSMUSG00000060032	H2J.A histone [Source:MGI Symbol;Acc:MGI:3606192]	H2aj	50.626	40.4619	71.3194	81.9462	69.8484	81.6724		0.711159	0.00288524	6.24106e-05
	ENSMUSG00000008604	ubiquilin 4 [Source:MGI Symbol;Acc:MGI:2150152]	Ubqln4	51.0235	52.0937	53.3064	66.0327	59.6472	62.1421		0.285656	0.00294998	6.4505e-05
	ENSMUSG00000039477	trinucleotide repeat containing 18 [Source:MGI Symbol;Acc:MGI:3648294]	Tnrc18	21.5797	20.0134	22.3106	26.3057	24.4088	26.4984		0.331824	0.00294998	6.45845e-05
	ENSMUSG00000056917	signal-induced proliferation associated gene 1 [Source:MGI Symbol;Acc:MGI:107576]	Sipa1	126.835	119.109	117.216	139.215	128.091	155.677		0.304196	0.00299346	6.5929e-05
	ENSMUSG00000034459	interferon-induced protein with tetratricopeptide repeats 1 [Source:MGI Symbol;Acc:MGI:99450]	Ifit1	3.77068	4.22978	3.28795	0.795666	2.02287	1.36019		-1.46051	0.00303722	6.80871e-05
	ENSMUSG00000115681	predicted gene 2682 [Source:MGI Symbol;Acc:MGI:3780851]	Gm2682	210.493	191.751	160.811	155.759	165.918	130.014		-0.465536	0.00303722	6.79365e-05
	ENSMUSG00000011096	AKT1 substrate 1 (proline-rich) [Source:MGI Symbol;Acc:MGI:1914855]	Akt1s1	13.6847	13.1948	16.2299	20.0945	17.1465	20.1701		0.516474	0.00303722	6.79168e-05
	ENSMUSG00000002603	transforming growth factor, beta 1 [Source:MGI Symbol;Acc:MGI:98725]	Tgfb1	90.6768	75.8171	89.2389	100.394	100.166	113.144		0.397935	0.0030823	6.95017e-05
	ENSMUSG00000031706	regulatory factor X, 1 (influences HLA class II expression) [Source:MGI Symbol;Acc:MGI:105982]	Rfx1	22.5626	21.8126	18.4109	32.2556	24.9159	27.2708		0.369558	0.00308463	6.99587e-05
	ENSMUSG00000041481	serine (or cysteine) peptidase inhibitor, clade A, member 3G [Source:MGI Symbol;Acc:MGI:105046]	Serpina3g	73.8547	65.0532	68.5484	35.8776	62.408	45.6621		-0.550241	0.00314264	7.16865e-05
	ENSMUSG00000024065	EH-domain containing 3 [Source:MGI Symbol;Acc:MGI:1928900]	Ehd3	38.5156	38.1273	33.8945	23.4731	31.5658	27.5439		-0.421732	0.00315422	7.23641e-05
	ENSMUSG00000050075	G protein-coupled receptor 171 [Source:MGI Symbol;Acc:MGI:2442043]	Gpr171	170.204	193.914	173.515	111.976	144.41	138.799		-0.381009	0.00316973	7.31355e-05
	ENSMUSG00000022906	poly (ADP-ribose) polymerase family, member 9 [Source:MGI Symbol;Acc:MGI:1933117]	Parp9	90.0165	95.7256	81.7856	62.2334	82.2328	69.59		-0.342581	0.00324474	7.52916e-05
	ENSMUSG00000022747	ST3 beta-galactoside alpha-2,3-sialyltransferase 6 [Source:MGI Symbol;Acc:MGI:1888707]	St3gal6	72.7923	66.9048	66.7803	45.8635	61.0035	53.5666		-0.347791	0.00329619	7.83511e-05
	ENSMUSG00000031833	microtubule associated serine/threonine kinase 3 [Source:MGI Symbol;Acc:MGI:2683541]	Mast3	68.9524	63.8107	64.3199	93.3698	68.7283	82.7631		0.322374	0.00329619	7.82282e-05
	ENSMUSG00000024925	ribonuclease H2, subunit C [Source:MGI Symbol;Acc:MGI:1915459]	Rnaseh2c	33.1363	30.4515	40.0848	39.4316	42.692	48.5773		0.500879	0.00329619	7.80084e-05
	ENSMUSG00000053560	immediate early response 2 [Source:MGI Symbol;Acc:MGI:104815]	Ier2	74.8078	68.6355	85.0866	120.276	94.1495	108.613		0.558607	0.00329619	7.78015e-05
	ENSMUSG00000074876	NA	NA	15.1861	14.2264	18.632	22.8137	20.7796	23.8893		0.61415	0.00329619	7.8646e-05
	ENSMUSG00000027510	RNA binding motif protein 38 [Source:MGI Symbol;Acc:MGI:1889294]	Rbm38	93.2351	83.1304	101.721	119.328	99.4728	125.921		0.432862	0.00329846	7.91324e-05
	ENSMUSG00000020077	serglycin [Source:MGI Symbol;Acc:MGI:97756]	Srgn	675.966	708.746	619.392	478.483	563.343	548.42		-0.306689	0.00331886	8.00571e-05
	ENSMUSG00000082292	predicted gene 12250 [Source:MGI Symbol;Acc:MGI:3649299]	Gm12250	306.671	320.313	257.128	168.41	276.6	202.451		-0.518914	0.0033772	8.19071e-05
	ENSMUSG00000027514	Z-DNA binding protein 1 [Source:MGI Symbol;Acc:MGI:1927449]	Zbp1	77.052	84.7049	63.9939	42.9901	57.913	58.1031		-0.452035	0.00338925	8.3088e-05
	ENSMUSG00000026655	family with sequence similarity 107, member B [Source:MGI Symbol;Acc:MGI:1913790]	Fam107b	627.805	605.401	539.786	528.765	537.593	507.139		-0.209023	0.00338925	8.26805e-05
	ENSMUSG00000053012	lysine-rich coiled-coil 1 [Source:MGI Symbol;Acc:MGI:1889377]	Krcc1	135.445	132.054	122.193	110.819	116.031	107.014		-0.253442	0.00343426	8.46415e-05
	ENSMUSG00000039899	fibrinogen-like protein 2 [Source:MGI Symbol;Acc:MGI:103266]	Fgl2	258.483	261.588	218.341	72.4964	217.704	141.901		-0.829669	0.00346097	9.3196e-05
	ENSMUSG00000038578	sushi domain containing 1 [Source:MGI Symbol;Acc:MGI:3651543]	Susd1	4.25152	3.82245	4.04813	2.07702	3.09457	2.45778		-0.67216	0.00346097	8.71817e-05
	ENSMUSG00000076471	T cell receptor beta, variable 14 [Source:MGI Symbol;Acc:MGI:98587]	Trbv14	222.779	214.521	193.431	157.469	182.641	158.857		-0.378453	0.00346097	9.07992e-05
	ENSMUSG00000022724	ribosomal oxygenase 2 [Source:MGI Symbol;Acc:MGI:1914264]	Riox2	88.4511	79.6956	77.4922	61.9416	77.9057	62.6633		-0.333059	0.00346097	8.64456e-05
	ENSMUSG00000078606	GTPase, very large interferon inducible, family member 2 [Source:MGI Symbol;Acc:MGI:3782245]	Gvin2	14.2003	14.3876	11.6707	11.2845	11.983	10.4576		-0.332423	0.00346097	9.41038e-05
	ENSMUSG00000022657	CD96 antigen [Source:MGI Symbol;Acc:MGI:1934368]	Cd96	413.023	410.192	376.188	307.297	380.487	319.702		-0.286914	0.00346097	8.97511e-05
	ENSMUSG00000003623	carnitine O-octanoyltransferase [Source:MGI Symbol;Acc:MGI:1921364]	Crot	62.6445	68.2276	67.2619	51.9026	57.0377	52.6706		-0.275907	0.00346097	8.84202e-05
	ENSMUSG00000018677	solute carrier family 25, member 39 [Source:MGI Symbol;Acc:MGI:1196386]	Slc25a39	83.7478	81.9117	84.2272	96.4145	92.3515	97.8359		0.240635	0.00346097	9.24921e-05
	ENSMUSG00000052488	calcium homeostasis endoplasmic reticulum protein [Source:MGI Symbol;Acc:MGI:106417]	Cherp	111.16	101.582	105.412	127.617	119.3	126.579		0.261323	0.00346097	8.78987e-05
	ENSMUSG00000019254	protein phosphatase 1, regulatory subunit 12C [Source:MGI Symbol;Acc:MGI:1924258]	Ppp1r12c	65.0819	66.2354	65.1029	83.0829	69.4107	80.8699		0.292729	0.00346097	8.97143e-05
	ENSMUSG00000029547	integrator complex subunit 1 [Source:MGI Symbol;Acc:MGI:1915760]	Ints1	38.9683	34.0969	37.2329	42.1506	43.0938	47.002		0.33864	0.00346097	9.48278e-05
	ENSMUSG00000003575	CREB regulated transcription coactivator 1 [Source:MGI Symbol;Acc:MGI:2142523]	Crtc1	8.42516	7.31785	8.28191	11.0311	9.04436	10.2014		0.361384	0.00346097	8.85855e-05
	ENSMUSG00000023353	ArfGAP with GTPase domain, ankyrin repeat and PH domain 3 [Source:MGI Symbol;Acc:MGI:2183446]	Agap3	31.2087	29.3301	33.5491	44.0848	37.3994	38.885		0.369695	0.00346097	9.37212e-05
	ENSMUSG00000029406	phosphatidylinositol transfer protein, membrane-associated 2 [Source:MGI Symbol;Acc:MGI:1336192]	Pitpnm2	22.5959	21.6794	26.2736	31.7577	27.1675	29.0415		0.373549	0.00346097	9.05951e-05
	ENSMUSG00000039041	adhesion regulating molecule 1 [Source:MGI Symbol;Acc:MGI:1929289]	Adrm1	40.3939	39.0011	47.3205	49.2368	48.7385	53.6688		0.375126	0.00346097	9.09819e-05
	ENSMUSG00000071477	zinc finger protein 777 [Source:MGI Symbol;Acc:MGI:1919556]	Zfp777	37.0973	38.8	38.6309	56.2948	43.895	49.0317		0.38767	0.00346097	9.10883e-05
	ENSMUSG00000002274	meteorin, glial cell differentiation regulator [Source:MGI Symbol;Acc:MGI:1917333]	Metrn	23.0064	17.2306	24.7734	26.4865	29.836	32.1079		0.585199	0.00346097	9.38853e-05
	ENSMUSG00000066278	vacuolar protein sorting 37B [Source:MGI Symbol;Acc:MGI:1916724]	Vps37b	175.284	228.512	208.149	387.954	224.332	312.998		0.622213	0.00346097	9.36991e-05
	ENSMUSG00000046792	zinc finger protein 787 [Source:MGI Symbol;Acc:MGI:1914359]	Zfp787	5.84081	4.35111	5.59678	8.70515	7.58706	8.64855		0.719306	0.00346097	9.46359e-05
	ENSMUSG00000088609	NA	NA	2165.61	1920.32	2866.4	4650.02	3472.79	4934.04		1.11096	0.00346097	9.48281e-05
	ENSMUSG00000064288	H4 clustered histone 12 [Source:MGI Symbol;Acc:MGI:2448439]	H4c12	0.746491	0	1.95277	4.9909	3.37654	8.07024		3.51321	0.00346097	8.7724e-05
	ENSMUSG00000044867	GTPase, IMAP family member 1, opposite strand [Source:MGI Symbol;Acc:MGI:3781523]	Gimap1os	42.1243	41.4931	37.5835	32.1223	37.6655	29.0378		-0.396213	0.00347031	9.5539e-05
	ENSMUSG00000049086	brain expressed myelocytomatosis oncogene [Source:MGI Symbol;Acc:MGI:88184]	Bmyc	12.3205	10.3475	19.6271	29.9846	25.0777	21.7167		0.907196	0.00347071	9.60049e-05
	ENSMUSG00000045868	GTPase, very large interferon inducible 1 [Source:MGI Symbol;Acc:MGI:1921808]	Gvin1	9.81538	9.13755	7.56648	6.7316	7.65103	6.24874		-0.464439	0.00348325	9.68991e-05
	ENSMUSG00000095562	erythroid differentiation regulator 1 [Source:NCBI gene (formerly Entrezgene);Acc:170942]		0.738443	0.385073	0.772689	1.4106	1.67007	2.42968		1.8085	0.00348325	9.72652e-05
	ENSMUSG00000029703	leucine-rich repeats and WD repeat domain containing 1 [Source:MGI Symbol;Acc:MGI:1918985]	Lrwd1	29.9056	29.5627	29.5579	35.7082	34.3826	35.5402		0.272865	0.00348792	9.78529e-05
	ENSMUSG00000000386	MX dynamin-like GTPase 1 [Source:MGI Symbol;Acc:MGI:97243]	Mx1	11.0453	11.5917	9.73859	3.79078	7.04175	5.49542		-0.983694	0.00351903	9.9187e-05
	ENSMUSG00000039934	gamma-secretase activating protein [Source:MGI Symbol;Acc:MGI:2442259]	Gsap	12.2876	12.3636	11.0944	8.30059	9.78195	9.59806		-0.335274	0.00352407	9.97908e-05
	ENSMUSG00000047417	REX1, RNA exonuclease 1 [Source:MGI Symbol;Acc:MGI:1914182]	Rexo1	38.2641	35.6887	38.3328	50.8327	38.1932	49.2827		0.369085	0.00370137	0.000105297
	ENSMUSG00000025508	ribosomal protein, large P2 [Source:MGI Symbol;Acc:MGI:1914436]	Rplp2	948.369	885.684	1159.33	1441.8	1259.14	1246.86		0.444098	0.00370507	0.000105888
	ENSMUSG00000033355	receptor transporter protein 4 [Source:MGI Symbol;Acc:MGI:1915025]	Rtp4	20.4379	24.9344	19.7751	10.5432	15.424	14.5898		-0.60557	0.00370908	0.000107899
	ENSMUSG00000002797	gamma-glutamyl cyclotransferase [Source:MGI Symbol;Acc:MGI:95700]	Ggct	9.63797	9.07557	8.71877	6.77838	7.49473	6.91195		-0.384853	0.00370908	0.00010699
	ENSMUSG00000029322	placenta-specific 8 [Source:MGI Symbol;Acc:MGI:2445289]	Plac8	535.667	588.855	605.502	368.68	493.653	432.466		-0.365534	0.00370908	0.000108597
	ENSMUSG00000078920	interferon gamma inducible protein 47 [Source:MGI Symbol;Acc:MGI:99448]	Ifi47	521.093	551.027	496.963	371.547	482.948	402.395		-0.343154	0.00370908	0.00010657
	ENSMUSG00000060166	zinc finger, DHHC domain containing 8 [Source:MGI Symbol;Acc:MGI:1338012]	Zdhhc8	54.4944	53.9835	50.0629	75.6052	60.9408	66.0266		0.328537	0.00370908	0.000109406
	ENSMUSG00000046364	ribosomal protein L27A [Source:MGI Symbol;Acc:MGI:1347076]	Rpl27a	336.26	334.606	450.616	496.065	460.166	461.616		0.431751	0.00370908	0.000108042
	ENSMUSG00000035342	leucine zipper, putative tumor suppressor 2 [Source:MGI Symbol;Acc:MGI:2385095]	Lzts2	2.96941	3.49241	4.13719	8.90916	4.67175	6.31117		0.926036	0.00370908	0.000108978
	ENSMUSG00000028911	serine and arginine-rich splicing factor 4 [Source:MGI Symbol;Acc:MGI:1890577]	Srsf4	108.342	103.086	109.357	127.155	119.075	125.123		0.247583	0.00383004	0.000113476
	ENSMUSG00000002083	BCL2 binding component 3 [Source:MGI Symbol;Acc:MGI:2181667]	Bbc3	25.0559	19.5129	35.8082	59.9069	34.1736	42.6765		0.839468	0.00385579	0.000114745
	ENSMUSG00000040253	guanylate binding protein 7 [Source:MGI Symbol;Acc:MGI:2444421]	Gbp7	174.181	165.309	130.141	88.6992	140.852	115.715		-0.472984	0.00386393	0.000115494
	ENSMUSG00000061589	DOT1-like, histone H3 methyltransferase (S. cerevisiae) [Source:MGI Symbol;Acc:MGI:2143886]	Dot1l	46.086	43.0767	49.0048	55.7342	52.6679	53.0332		0.25783	0.00387963	0.000116471
	ENSMUSG00000039263	aminopeptidase-like 1 [Source:MGI Symbol;Acc:MGI:2448523]	Npepl1	108.373	108.367	107.505	149.698	120.844	126.418		0.2659	0.00395026	0.00011911
	ENSMUSG00000038025	PHD finger protein 2 [Source:MGI Symbol;Acc:MGI:1338034]	Phf2	73.4028	71.5967	69.9942	92.5396	79.3465	83.4111		0.238387	0.00401762	0.000121667
	ENSMUSG00000032475	non-catalytic region of tyrosine kinase adaptor protein 1 [Source:MGI Symbol;Acc:MGI:109601]	Nck1	51.033	48.9787	47.5512	43.729	45.5071	37.4891		-0.307344	0.00403953	0.00012286
	ENSMUSG00000024560	CXXC finger 1 (PHD domain) [Source:MGI Symbol;Acc:MGI:1921572]	Cxxc1	89.2753	90.3153	91.351	107.032	96.8933	108.303		0.2597	0.00405952	0.000124001
	ENSMUSG00000098934	GTPase, very large interferon inducible, pseudogene 4 [Source:MGI Symbol;Acc:MGI:5011038]	Gvin-ps4	3.40031	3.16633	2.17433	0.896982	2.02141	1.27862		-1.18346	0.00416576	0.000127792
	ENSMUSG00000110631	predicted gene, 42047 [Source:MGI Symbol;Acc:MGI:5624932]	Gm42047	108.657	98.7993	100.357	27.0235	56.8808	52.1298		-1.06108	0.00419106	0.000129117
	ENSMUSG00000000303	cadherin 1 [Source:MGI Symbol;Acc:MGI:88354]	Cdh1	84.7043	69.6676	55.2122	34.8219	54.0559	47.5331		-0.627305	0.00427599	0.000133976
	ENSMUSG00000076463	T cell receptor beta, variable 3 [Source:MGI Symbol;Acc:MGI:98590]	Trbv3	256.452	261.922	246.831	207.295	228.292	198.738		-0.305964	0.00427599	0.000133737
	ENSMUSG00000022390	zinc finger CCCH type containing 7B [Source:MGI Symbol;Acc:MGI:1328310]	Zc3h7b	45.7463	42.9676	45.1162	53.4481	52.9099	50.4488		0.225481	0.00427599	0.000133099
	ENSMUSG00000040857	Ets2 repressor factor [Source:MGI Symbol;Acc:MGI:109637]	Erf	20.4365	18.8559	23.6477	34.4131	25.2344	27.7101		0.484091	0.00427599	0.000133357
	ENSMUSG00000030789	integrin alpha X [Source:MGI Symbol;Acc:MGI:96609]	Itgax	6.83731	7.87048	7.48421	1.55156	4.38676	4.17111		-0.952352	0.00428058	0.000134681
	ENSMUSG00000037907	ankyrin repeat domain 13b [Source:MGI Symbol;Acc:MGI:2144501]	Ankrd13b	8.52388	8.97681	10.0777	18.3976	10.9766	13.4598		0.617023	0.00435066	0.000137456
	ENSMUSG00000034573	protein tyrosine phosphatase, non-receptor type 13 [Source:MGI Symbol;Acc:MGI:103293]	Ptpn13	8.70844	8.89413	6.54474	4.29205	6.83343	5.4095		-0.591654	0.00436135	0.000141225
	ENSMUSG00000030447	cytoplasmic FMR1 interacting protein 1 [Source:MGI Symbol;Acc:MGI:1338801]	Cyfip1	6.12446	6.59843	5.16182	3.39052	5.13462	3.99723		-0.558982	0.00436135	0.000138538
	ENSMUSG00000033114	solute carrier family 35, member D2 [Source:MGI Symbol;Acc:MGI:1917734]	Slc35d2	19.138	17.6764	15.5796	11.163	15.2687	12.5474		-0.46711	0.00436135	0.000141003
	ENSMUSG00000034422	poly (ADP-ribose) polymerase family, member 14 [Source:MGI Symbol;Acc:MGI:1919489]	Parp14	74.8194	71.5027	58.7267	53.9635	65.4774	55.102		-0.300382	0.00436135	0.00014121
	ENSMUSG00000002033	CD3 antigen, gamma polypeptide [Source:MGI Symbol;Acc:MGI:88333]	Cd3g	537.164	584.643	477.808	424.08	484.233	446.438		-0.259197	0.00436135	0.000140689
	ENSMUSG00000001436	solute carrier family 19 (folate transporter), member 1 [Source:MGI Symbol;Acc:MGI:103182]	Slc19a1	25.5273	25.9563	28.972	33.0516	34.0271	31.824		0.324281	0.00436135	0.000139628
	ENSMUSG00000081344	predicted gene 14303 [Source:MGI Symbol;Acc:MGI:3651379]	Gm14303	429.036	498.059	514.253	731.748	508.258	717.667		0.557858	0.00437241	0.000142156
	ENSMUSG00000007670	KH-type splicing regulatory protein [Source:MGI Symbol;Acc:MGI:1336214]	Khsrp	187.419	169.109	178.355	207.747	201.061	216.516		0.277071	0.00442629	0.000144488
	ENSMUSG00000021114	ATPase, H+ transporting, lysosomal V1 subunit D [Source:MGI Symbol;Acc:MGI:1921084]	Atp6v1d	82.2405	84.3196	70.8956	65.933	63.25	67.6544		-0.261883	0.00443821	0.00014558
	ENSMUSG00000044876	zinc finger protein 444 [Source:MGI Symbol;Acc:MGI:1923365]	Zfp444	9.08717	8.76394	8.63952	12.7856	10.7841	11.4269		0.38892	0.00443821	0.000146041
	ENSMUSG00000040451	sphingomyelin synthase 1 [Source:MGI Symbol;Acc:MGI:2444110]	Sgms1	5.21199	4.93765	3.91888	2.79488	3.8559	3.40486		-0.498806	0.00444229	0.000149877
	ENSMUSG00000024197	perilipin 3 [Source:MGI Symbol;Acc:MGI:1914155]	Plin3	23.3459	20.8114	18.5333	11.3987	16.5841	15.4409		-0.494759	0.00444229	0.000149459
	ENSMUSG00000078994	zinc finger protein 429 [Source:MGI Symbol;Acc:MGI:1920057]	Zfp429	29.0129	30.0494	27.1775	22.3504	23.9798	22.3283		-0.340668	0.00444229	0.000150743
	ENSMUSG00000024613	treacle ribosome biogenesis factor 1 [Source:MGI Symbol;Acc:MGI:892003]	Tcof1	133.348	126.186	130.199	147.534	147.459	149.722		0.221223	0.00444229	0.00014811
	ENSMUSG00000042625	scaffold attachment factor B2 [Source:MGI Symbol;Acc:MGI:2146808]	Safb2	44.2705	43.0251	41.5753	56.0283	46.2292	50.3194		0.236234	0.00444229	0.000149486
	ENSMUSG00000025579	glucosidase, alpha, acid [Source:MGI Symbol;Acc:MGI:95609]	Gaa	21.8881	19.7109	19.914	26.4867	23.1708	25.2229		0.292936	0.00444229	0.000148776
	ENSMUSG00000031805	Janus kinase 3 [Source:MGI Symbol;Acc:MGI:99928]	Jak3	65.8853	64.9014	68.5879	78.8057	73.3617	82.965		0.314959	0.00444229	0.000150834
	ENSMUSG00000052949	ring finger protein 157 [Source:MGI Symbol;Acc:MGI:2442484]	Rnf157	9.65859	9.31233	10.5409	12.8871	13.3549	13.2926		0.476435	0.00444229	0.000150094
	ENSMUSG00000035208	schlafen 8 [Source:MGI Symbol;Acc:MGI:2672859]	Slfn8	38.5423	41.6739	33.2854	30.3417	33.4765	29.2218		-0.34544	0.00450284	0.00015441
	ENSMUSG00000007833	aldehyde dehydrogenase 16 family, member A1 [Source:MGI Symbol;Acc:MGI:1916998]	Aldh16a1	21.0659	20.2798	21.4937	24.1958	25.4282	24.4964		0.262291	0.00450284	0.000154674
	ENSMUSG00000001909	tRNA methyltransferase 1 [Source:MGI Symbol;Acc:MGI:1289155]	Trmt1	35.4011	33.5842	34.4278	47.1995	36.0014	42.4982		0.29963	0.00450284	0.0001538
	ENSMUSG00000037740	mitochondrial ribosomal protein S26 [Source:MGI Symbol;Acc:MGI:1333830]	Mrps26	26.6681	26.0224	31.5258	33.332	32.9484	34.2391		0.341453	0.00450284	0.000155842
	ENSMUSG00000076281	NA	NA	259.464	295.639	354.514	692.722	404.758	772.084		1.26464	0.00450284	0.000155292
	ENSMUSG00000035203	epsin 1 [Source:MGI Symbol;Acc:MGI:1333763]	Epn1	167.675	152.031	158.496	188.925	181.678	194.249		0.282832	0.0045338	0.000158102
	ENSMUSG00000063160	numb-like [Source:MGI Symbol;Acc:MGI:894702]	Numbl	1.87978	1.82045	1.82646	3.01373	2.12566	3.05463		0.649889	0.0045338	0.000158042
	ENSMUSG00000028358	zinc finger protein 618 [Source:MGI Symbol;Acc:MGI:1919950]	Zfp618	0.0996172	0.0324668	0.0760061	0	0.0337942	0		-3.09826	0.00456788	0.000160058
	ENSMUSG00000025880	SMAD family member 7 [Source:MGI Symbol;Acc:MGI:1100518]	Smad7	48.8889	51.4445	51.1427	75.3806	50.1224	68.3822		0.408172	0.00456788	0.000161087
	ENSMUSG00000032860	purinergic receptor P2Y, G-protein coupled 2 [Source:MGI Symbol;Acc:MGI:105107]	P2ry2	0	0	0	0.0566467	0.107306	0.0836322		2.6037	0.00456788	0.000160595
	ENSMUSG00000118495	predicted gene, 21011 [Source:MGI Symbol;Acc:MGI:5434366]	Gm21011	12.0037	11.0505	9.92127	5.5966	7.4109	7.48727		-0.623408	0.00459078	0.000162496
	ENSMUSG00000020153	NADH:ubiquinone oxidoreductase core subunit S7 [Source:MGI Symbol;Acc:MGI:1922656]	Ndufs7	74.291	73.2564	85.3491	97.3063	91.183	97.686		0.373789	0.00462165	0.000164195
	ENSMUSG00000111118	predicted gene 6545 [Source:MGI Symbol;Acc:MGI:3643874]	Gm6545	8.08517	8.50027	6.08356	3.23837	5.54463	4.29072		-0.832034	0.00463419	0.000165855
	ENSMUSG00000061479	small nuclear ribonucleoprotein polypeptide A [Source:MGI Symbol;Acc:MGI:1855690]	Snrpa	119.91	105.768	126.245	130.927	144.622	148.921		0.36502	0.00463419	0.000165318
	ENSMUSG00000032750	growth factor receptor bound protein 2-associated protein 3 [Source:MGI Symbol;Acc:MGI:2387324]	Gab3	35.4356	33.7887	25.7057	26.2128	26.073	23.8869		-0.406493	0.0046608	0.000167419
	ENSMUSG00000117446	predicted gene, 35551 [Source:MGI Symbol;Acc:MGI:5594710]	Gm35551	1.96452	2.84564	1.42752	0.312725	0.394931	0.307801		-2.53491	0.00471754	0.000170075
	ENSMUSG00000057657	ribosomal protein S18, pseudogene 3 [Source:MGI Symbol;Acc:MGI:3642474]	Rps18-ps3	48.2665	65.5867	78.8304	100.737	70.0009	116.197		0.853356	0.00474427	0.000171661
	ENSMUSG00000049932	H2A.X variant histone [Source:MGI Symbol;Acc:MGI:102688]	H2ax	269.928	234.194	275.285	341.392	344.132	358.086		0.489137	0.00474532	0.000172321
	ENSMUSG00000030165	killer cell lectin-like receptor, subfamily D, member 1 [Source:MGI Symbol;Acc:MGI:1196275]	Klrd1	337.358	361.582	381.92	221.496	303.544	266.209		-0.388086	0.00478881	0.000174528
	ENSMUSG00000010048	interferon-related developmental regulator 2 [Source:MGI Symbol;Acc:MGI:1316708]	Ifrd2	43.1895	44.7327	52.4472	56.5619	59.2457	56.4601		0.355485	0.0048287	0.000176615
	ENSMUSG00000071716	apolipoprotein L 7e [Source:MGI Symbol;Acc:MGI:3704456]	Apol7e	110.181	113.83	88.5041	69.7119	84.8369	83.9879		-0.369232	0.00488836	0.000179784
	ENSMUSG00000024070	protein kinase D3 [Source:MGI Symbol;Acc:MGI:1922542]	Prkd3	57.5656	58.6755	49.8642	44.3409	51.4548	46.1468		-0.256764	0.00488836	0.000181361
	ENSMUSG00000029439	splicing factor SWAP [Source:MGI Symbol;Acc:MGI:101760]	Sfswap	36.6971	37.4603	37.9395	47.118	40.0849	43.4614		0.241766	0.00488836	0.000180964
	ENSMUSG00000047810	coiled-coil domain containing 88B [Source:MGI Symbol;Acc:MGI:1925567]	Ccdc88b	130.454	122.58	123.278	147.454	141.797	149.092		0.250088	0.00488836	0.000180596
	ENSMUSG00000025572	transmembrane channel-like gene family 6 [Source:MGI Symbol;Acc:MGI:1098686]	Tmc6	68.118	67.6135	61.1847	84.0922	68.3693	79.7444		0.249768	0.00493612	0.000183779
	ENSMUSG00000043004	guanine nucleotide binding protein (G protein), gamma 2 [Source:MGI Symbol;Acc:MGI:102705]	Gng2	137.064	141.717	120.234	114.975	113.411	114.637		-0.228378	0.00495781	0.000185237
	ENSMUSG00000024002	bromodomain containing 4 [Source:MGI Symbol;Acc:MGI:1888520]	Brd4	88.2056	83.816	82.2966	99.6976	91.5455	97.216		0.198202	0.00498455	0.00018689
	ENSMUSG00000026107	nucleic acid binding protein 1 [Source:MGI Symbol;Acc:MGI:1923258]	Nabp1	73.8757	71.9236	60.8214	45.7311	55.9219	50.4217		-0.462338	0.00501916	0.000188845
	ENSMUSG00000055447	CD47 antigen (Rh-related antigen, integrin-associated signal transducer) [Source:MGI Symbol;Acc:MGI:96617]	Cd47	366.28	343.277	317.884	252.969	324.856	282.6		-0.267917	0.00506955	0.000191406
	ENSMUSG00000020064	hect domain and RLD 4 [Source:MGI Symbol;Acc:MGI:1914595]	Herc4	48.1472	48.0541	42.2858	42.1636	42.8923	38.8911		-0.216797	0.00508359	0.000193269
	ENSMUSG00000028005	guanylate cyclase 1, soluble, beta 1 [Source:MGI Symbol;Acc:MGI:1860604]	Gucy1b1	0.237235	0.270615	0.387869	2.80401	0.697491	1.1151		2.04904	0.00508359	0.000193147
	ENSMUSG00000082978	ribosomal protein SA, pseudogene 11 [Source:MGI Symbol;Acc:MGI:3649246]	Rpsa-ps11	12.9683	16.7355	16.3339	24.8975	20.1453	22.9047		0.631943	0.00511962	0.000195309
	ENSMUSG00000020707	ring finger protein 135 [Source:MGI Symbol;Acc:MGI:1919206]	Rnf135	5.93146	6.73944	6.64308	3.53428	4.13515	3.68326		-0.735907	0.00513878	0.000197388
	ENSMUSG00000012114	mediator complex subunit 15 [Source:MGI Symbol;Acc:MGI:2137379]	Med15	35.1898	35.0914	32.7171	41.0624	36.3497	40.6133		0.221697	0.00513878	0.000197216
	ENSMUSG00000038058	nucleotide-binding oligomerization domain containing 1 [Source:MGI Symbol;Acc:MGI:1341839]	Nod1	48.0347	49.4093	36.847	39.2652	38.2687	34.8318		-0.35151	0.0051447	0.00019829
	ENSMUSG00000035478	methyl-CpG binding domain protein 3 [Source:MGI Symbol;Acc:MGI:1333812]	Mbd3	143.705	142.723	148.049	167.202	166.69	165.011		0.223739	0.00522262	0.000201978
	ENSMUSG00000050628	UBA-like domain containing 2 [Source:MGI Symbol;Acc:MGI:1914635]	Ubald2	28.581	32.8007	33.8039	46.3199	40.1587	44.5187		0.528216	0.00527111	0.000204544
	ENSMUSG00000066677	interferon activated gene 208 [Source:MGI Symbol;Acc:MGI:2442822]	Ifi208	113.883	107.841	85.8819	69.1089	86.9351	83.8444		-0.351397	0.00529877	0.000206312
	ENSMUSG00000012296	tight junction associated protein 1 [Source:MGI Symbol;Acc:MGI:1921344]	Tjap1	21.3781	22.7997	22.119	27.9661	24.6731	26.3382		0.274381	0.00534003	0.000208618
	ENSMUSG00000027639	SAM domain and HD domain, 1 [Source:MGI Symbol;Acc:MGI:1927468]	Samhd1	299.238	304.028	229.368	226.597	234.103	229.478		-0.31007	0.0053692	0.00021187
	ENSMUSG00000029192	TBC1 domain family, member 14 [Source:MGI Symbol;Acc:MGI:1098708]	Tbc1d14	45.9894	44.6214	37.2425	32.4758	35.4348	35.8847		-0.292353	0.0053692	0.000211111
	ENSMUSG00000054435	GTPase, IMAP family member 4 [Source:MGI Symbol;Acc:MGI:1349656]	Gimap4	2154.66	2343.5	1986.99	1922.32	1901.42	1803.74		-0.242571	0.0053692	0.000211415
	ENSMUSG00000020472	zinc finger with KRAB and SCAN domains 17 [Source:MGI Symbol;Acc:MGI:2679270]	Zkscan17	41.4574	39.9705	38.0819	51.5389	43.5168	48.2856		0.267981	0.00537428	0.000213479
	ENSMUSG00000004934	protein inhibitor of activated STAT 4 [Source:MGI Symbol;Acc:MGI:2136940]	Pias4	20.8953	19.6394	20.9134	26.2487	22.8088	25.5984		0.322795	0.00537428	0.000212974
	ENSMUSG00000067288	ribosomal protein S28 [Source:MGI Symbol;Acc:MGI:1859516]	Rps28	242.931	247.019	265.763	324.489	270.938	292.251		0.259831	0.00550485	0.000219388
	ENSMUSG00000078453	ABRA C-terminal like [Source:MGI Symbol;Acc:MGI:1920362]	Abracl	442.542	425.829	410.985	327.568	387.373	355.378		-0.248647	0.00553767	0.000222422
	ENSMUSG00000025403	serine hydroxymethyltransferase 2 (mitochondrial) [Source:MGI Symbol;Acc:MGI:1277989]	Shmt2	226.837	212.951	243.882	243.774	266.606	267.401		0.264146	0.00553767	0.000222873
	ENSMUSG00000001419	myocyte enhancer factor 2D [Source:MGI Symbol;Acc:MGI:99533]	Mef2d	97.8902	102.529	95.6568	136.537	101.176	121.071		0.284583	0.00553767	0.000221491
	ENSMUSG00000074896	interferon-induced protein with tetratricopeptide repeats 3 [Source:MGI Symbol;Acc:MGI:1101055]	Ifit3	8.87575	11.484	7.79766	4.39804	6.88233	5.33257		-0.784813	0.00554528	0.000223907
	ENSMUSG00000032238	RAR-related orphan receptor alpha [Source:MGI Symbol;Acc:MGI:104661]	Rora	7.11847	7.11977	5.90418	5.14816	5.70625	5.13411		-0.377913	0.00554886	0.000224779
	ENSMUSG00000048852	predicted gene 12185 [Source:MGI Symbol;Acc:MGI:3652173]	Gm12185	9.69222	9.37464	7.52449	3.54362	7.52351	5.64322		-0.690996	0.00559377	0.000227331
	ENSMUSG00000071068	triggering receptor expressed on myeloid cells-like 2 [Source:MGI Symbol;Acc:MGI:2147038]	Treml2	70.1747	71.1063	63.731	80.2128	79.3805	80.5307		0.230634	0.00562176	0.000229206
	ENSMUSG00000039844	Rap guanine nucleotide exchange factor (GEF) 1 [Source:MGI Symbol;Acc:MGI:104580]	Rapgef1	105.422	102.163	102.087	125.461	109.613	117.416		0.198883	0.00567394	0.000232077
	ENSMUSG00000041685	FCH domain only 2 [Source:MGI Symbol;Acc:MGI:3505790]	Fcho2	18.5873	17.697	13.3074	13.6685	12.6849	13.5409		-0.344969	0.00569034	0.000235731
	ENSMUSG00000064262	GTPase, IMAP family member 8 [Source:MGI Symbol;Acc:MGI:2685303]	Gimap8	166.212	179.142	139.692	147.119	141.337	129.417		-0.299785	0.00569034	0.000236867
	ENSMUSG00000003345	casein kinase 1, gamma 2 [Source:MGI Symbol;Acc:MGI:1920014]	Csnk1g2	141.766	142.646	150.059	168.966	159.253	169.091		0.245987	0.00569034	0.000236593
	ENSMUSG00000027134	lysophosphatidylcholine acyltransferase 4 [Source:MGI Symbol;Acc:MGI:2138993]	Lpcat4	60.1857	59.0481	59.1352	72.8503	63.5148	70.9277		0.250966	0.00569034	0.000237224
	ENSMUSG00000035392	DENN/MADD domain containing 1A [Source:MGI Symbol;Acc:MGI:2442794]	Dennd1a	6.42068	6.12444	6.14798	9.02477	7.07171	7.79107		0.339004	0.00569034	0.000234576
	ENSMUSG00000039911	splA/ryanodine receptor domain and SOCS box containing 1 [Source:MGI Symbol;Acc:MGI:1921896]	Spsb1	11.5499	11.5691	14.1136	17.9894	13.7556	20.9685		0.69817	0.00569034	0.000236974
	ENSMUSG00000087387	predicted gene 15420 [Source:MGI Symbol;Acc:MGI:3705302]	Gm15420	1.50068	0.391275	0.523424	8.0266	2.44364	7.05377		2.69912	0.00569414	0.000238129
	ENSMUSG00000024007	peptidylprolyl isomerase (cyclophilin)-like 1 [Source:MGI Symbol;Acc:MGI:1916066]	Ppil1	111.787	112.645	117.695	56.9943	96.2313	82.9831		-0.454996	0.00575686	0.000242027
	ENSMUSG00000039461	T cell leukemia translocation altered gene [Source:MGI Symbol;Acc:MGI:1918829]	Tcta	19.5777	19.3279	18.6735	14.584	14.7877	14.1757		-0.409704	0.00575686	0.000243771
	ENSMUSG00000074794	arrestin domain containing 3 [Source:MGI Symbol;Acc:MGI:2145242]	Arrdc3	34.8837	38.5231	34.5179	29.8389	28.2788	29.8583		-0.26916	0.00575686	0.000242296
	ENSMUSG00000031862	ATPase type 13A1 [Source:MGI Symbol;Acc:MGI:2180801]	Atp13a1	62.5795	62.875	61.0269	73.6008	64.0014	73.9429		0.22958	0.00575686	0.000243724
	ENSMUSG00000040433	zinc finger and BTB domain containing 38 [Source:MGI Symbol;Acc:MGI:2442866]	Zbtb38	8.94262	8.75979	8.07472	6.62633	7.71277	6.75527		-0.317659	0.00580379	0.000246518
	ENSMUSG00000003068	serine/threonine kinase 11 [Source:MGI Symbol;Acc:MGI:1341870]	Stk11	62.4979	59.3338	61.3034	73.7295	62.7487	74.7678		0.268946	0.0058199	0.000247966
	ENSMUSG00000024807	synovial apoptosis inhibitor 1, synoviolin [Source:MGI Symbol;Acc:MGI:1921376]	Syvn1	28.8555	27.0574	25.9555	33.5577	29.5729	33.142		0.255626	0.00583656	0.000250206
	ENSMUSG00000019139	myo-inositol 1-phosphate synthase A1 [Source:MGI Symbol;Acc:MGI:1919030]	Isyna1	74.4321	70.984	84.0783	84.7434	89.2171	94.869		0.334282	0.00583656	0.00024976
	ENSMUSG00000030616	synaptotagmin-like 2 [Source:MGI Symbol;Acc:MGI:1933366]	Sytl2	34.6152	35.7224	32.9793	19.5131	31.2388	24.7236		-0.45599	0.00593221	0.00025664
	ENSMUSG00000049804	armadillo repeat containing, X-linked 4 [Source:MGI Symbol;Acc:MGI:2147887]	Armcx4	14.2289	12.3032	12.3057	18.3753	16.5084	15.4573		0.30199	0.00593221	0.000255332
	ENSMUSG00000020131	proprotein convertase subtilisin/kexin type 4 [Source:MGI Symbol;Acc:MGI:97514]	Pcsk4	7.87373	7.33926	10.127	16.4319	10.6844	12.5833		0.678766	0.00593221	0.000256316
	ENSMUSG00000068101	centromere protein M [Source:MGI Symbol;Acc:MGI:1913820]	Cenpm	50.9165	41.4041	51.4315	54.4091	60.9155	66.1451		0.450476	0.00595904	0.000259363
	ENSMUSG00000070056	malignant fibrous histiocytoma amplified sequence 1 [Source:MGI Symbol;Acc:MGI:1098644]	Mfhas1	6.16678	6.83235	7.14435	11.2294	7.83867	9.34459		0.52001	0.00595904	0.000258803
	ENSMUSG00000111966	predicted gene 5781 [Source:MGI Symbol;Acc:MGI:3646721]	Gm5781	30.4932	42.4945	39.1965	61.5131	42.5672	80.5614		0.975476	0.00598773	0.000261396
	ENSMUSG00000022983	SR-related CTD-associated factor 4 [Source:MGI Symbol;Acc:MGI:2146350]	Scaf4	52.6829	51.7911	53.3354	68.5484	54.9914	62.2185		0.256313	0.00605791	0.000266048
	ENSMUSG00000029036	ATPase family, AAA domain containing 3A [Source:MGI Symbol;Acc:MGI:1919214]	Atad3a	60.9945	59.7582	69.638	79.409	72.6663	72.7213		0.272729	0.00605791	0.000265808
	ENSMUSG00000054342	potassium intermediate/small conductance calcium-activated channel, subfamily N, member 4 [Source:MGI Symbol;Acc:MGI:1277957]	Kcnn4	111.33	103.377	110.12	123.207	121.969	128.63		0.256081	0.00609725	0.000268575
	ENSMUSG00000002257	differentially expressed in FDCP 6 [Source:MGI Symbol;Acc:MGI:1346328]	Def6	180.345	168.349	193.018	202.138	200.248	229.765		0.340138	0.00616546	0.000272388
	ENSMUSG00000044258	cytotoxic T lymphocyte-associated protein 2 alpha [Source:MGI Symbol;Acc:MGI:88554]	Ctla2a	133.191	143.749	142.297	84.5801	126.238	102.152		-0.40066	0.00624825	0.000279322
	ENSMUSG00000044468	terminal nucleotidyltransferase 5C [Source:MGI Symbol;Acc:MGI:1921895]	Tent5c	48.3802	51.9163	37.8064	39.1671	30.4795	37.3294		-0.377732	0.00624825	0.000277456
	ENSMUSG00000061374	Flt3 interacting zinc finger protein 1 [Source:MGI Symbol;Acc:MGI:1344336]	Fiz1	33.7512	33.7723	33.7497	41.4929	36.0437	40.2323		0.253102	0.00624825	0.000277883
	ENSMUSG00000039568	UBA-like domain containing 1 [Source:MGI Symbol;Acc:MGI:1916255]	Ubald1	23.6354	22.4515	22.6815	34.0626	26.6889	29.6518		0.385645	0.00624825	0.000278897
	ENSMUSG00000039497	dermatan sulfate epimerase [Source:MGI Symbol;Acc:MGI:2443455]	Dse	41.9977	39.9352	34.5617	30.0622	33.5506	32.6885		-0.27501	0.00631845	0.000283289
	ENSMUSG00000044857	LEM domain containing 2 [Source:MGI Symbol;Acc:MGI:2385045]	Lemd2	22.6263	22.8003	21.5214	32.9524	23.1489	28.5029		0.337038	0.00632454	0.000284391
	ENSMUSG00000041231	ubiquitin-like domain containing CTD phosphatase 1 [Source:MGI Symbol;Acc:MGI:1933105]	Ublcp1	35.9619	36.0725	31.0784	23.1027	25.8604	27.0026		-0.397281	0.00633	0.000285467
	ENSMUSG00000033066	growth arrest specific 7 [Source:MGI Symbol;Acc:MGI:1202388]	Gas7	3.70639	4.57211	3.27534	1.04679	2.68598	2.05124		-0.965087	0.00635433	0.000287704
	ENSMUSG00000003380	Rab acceptor 1 (prenylated) [Source:MGI Symbol;Acc:MGI:1201692]	Rabac1	72.1042	68.6805	89.5429	105.164	88.6085	95.0984		0.396538	0.00635433	0.00028823
	ENSMUSG00000032422	sorting nexin 14 [Source:MGI Symbol;Acc:MGI:2155664]	Snx14	17.9348	18.4613	13.6943	14.2718	14.1039	12.6854		-0.38119	0.0063878	0.000290585
	ENSMUSG00000028430	nucleolar protein family 6 (RNA-associated) [Source:MGI Symbol;Acc:MGI:2140151]	Nol6	96.3255	87.4919	92.8659	104.245	104.263	106.154		0.219356	0.00640339	0.000292393
	ENSMUSG00000055053	nuclear factor I/C [Source:MGI Symbol;Acc:MGI:109591]	Nfic	23.2554	20.4481	22.6215	24.5099	25.7729	28.0869		0.325134	0.00640339	0.000292974
	ENSMUSG00000044348	solute carrier family 25, member 53 [Source:MGI Symbol;Acc:MGI:1914312]	Slc25a53	10.6903	10.9815	9.97207	9.19082	9.35338	8.23499		-0.300471	0.0064359	0.000296992
	ENSMUSG00000021262	Ena-vasodilator stimulated phosphoprotein [Source:MGI Symbol;Acc:MGI:1194884]	Evl	360.33	362.032	287.294	304.168	293.147	290.778		-0.230453	0.0064359	0.00029548
	ENSMUSG00000059895	protein tyrosine phosphatase 4a3 [Source:MGI Symbol;Acc:MGI:1277098]	Ptp4a3	59.0793	54.6475	62.3969	67.7988	64.5539	68.8387		0.258439	0.0064359	0.00029685
	ENSMUSG00000027531	inositol (myo)-1(or 4)-monophosphatase 1 [Source:MGI Symbol;Acc:MGI:1933158]	Impa1	43.651	42.7215	37.7826	31.2381	36.1365	35.5385		-0.248497	0.006469	0.000299368
	ENSMUSG00000024677	membrane-spanning 4-domains, subfamily A, member 6B [Source:MGI Symbol;Acc:MGI:1917024]	Ms4a6b	626.481	645.983	602.677	504.893	498.248	486.936		-0.338734	0.00648255	0.000300844
	ENSMUSG00000076476	T cell receptor beta, variable 20 [Source:MGI Symbol;Acc:MGI:98589]	Trbv20	82.3858	94.7143	81.2354	58.435	66.3535	60.1293		-0.482115	0.00651301	0.000307381
	ENSMUSG00000058900	regulator of sex limited protein 1 [Source:MGI Symbol;Acc:MGI:3044162]	Rsl1	17.8684	17.6142	16.1181	12.9889	15.9256	12.1225		-0.424017	0.00651301	0.000305706
	ENSMUSG00000090272	myeloid nuclear differentiation antigen like [Source:MGI Symbol;Acc:MGI:3780953]	Mndal	154.621	161.665	129.284	138.513	117.992	124.961		-0.267133	0.00651301	0.000307284
	ENSMUSG00000043019	ER degradation enhancer, mannosidase alpha-like 3 [Source:MGI Symbol;Acc:MGI:1914217]	Edem3	43.6355	42.7061	37.2695	36.5697	36.9816	34.9646		-0.227232	0.00651301	0.000304316
	ENSMUSG00000020329	polymerase (RNA) mitochondrial (DNA directed) [Source:MGI Symbol;Acc:MGI:1915843]	Polrmt	24.4339	22.8775	23.7551	27.9904	25.5893	28.9985		0.273528	0.00651301	0.000303862
	ENSMUSG00000046556	zinc finger protein 319 [Source:MGI Symbol;Acc:MGI:1890618]	Zfp319	18.9686	19.3547	18.0567	26.3761	18.8642	24.6136		0.344641	0.00651301	0.000306296
	ENSMUSG00000032712	retroelement silencing factor 1 [Source:MGI Symbol;Acc:MGI:1914496]	Resf1	127.76	127.408	103.232	111.572	103.521	97.7642		-0.277713	0.00653977	0.000311358
	ENSMUSG00000058301	UPF1 regulator of nonsense transcripts homolog (yeast) [Source:MGI Symbol;Acc:MGI:107995]	Upf1	128.38	119.631	128.261	141.453	133.978	145.342		0.218486	0.00653977	0.000312073
	ENSMUSG00000063576	kelch domain containing 3 [Source:MGI Symbol;Acc:MGI:2651568]	Klhdc3	99.9255	99.8828	99.312	115.258	107.339	116.821		0.225836	0.00653977	0.000311098
	ENSMUSG00000033434	GTP binding protein 6 (putative) [Source:MGI Symbol;Acc:MGI:1306825]	Gtpbp6	19.2095	18.7014	19.4821	25.9855	20.2865	25.2276		0.375803	0.00653977	0.000311484
	ENSMUSG00000028530	Janus kinase 1 [Source:MGI Symbol;Acc:MGI:96628]	Jak1	558.286	537.391	444.17	462.078	456.595	441.064		-0.228353	0.00659783	0.000316574
	ENSMUSG00000005566	tripartite motif-containing 28 [Source:MGI Symbol;Acc:MGI:109274]	Trim28	274.411	263.175	266.755	307.275	303.806	299.831		0.189309	0.00659783	0.00031591
	ENSMUSG00000051498	toll-like receptor 6 [Source:MGI Symbol;Acc:MGI:1341296]	Tlr6	21.1221	20.8557	17.0557	7.69955	16.14	13.9817		-0.587174	0.00663377	0.000319168
	ENSMUSG00000040009	guanine nucleotide binding protein, alpha z subunit [Source:MGI Symbol;Acc:MGI:95780]	Gnaz	0	0	0	0.153967	0.116664	0.0606171		2.40641	0.0066346	0.000320078
	ENSMUSG00000040940	Rho guanine nucleotide exchange factor (GEF) 1 [Source:MGI Symbol;Acc:MGI:1353510]	Arhgef1	369.208	335.889	344.215	422.016	359.398	412.752		0.22562	0.0066876	0.000324388
	ENSMUSG00000042507	mitotic deacetylase associated SANT domain protein [Source:MGI Symbol;Acc:MGI:2685106]	Mideas	51.9301	49.0491	48.6574	73.4198	49.8434	64.0795		0.336085	0.0066876	0.000324322
	ENSMUSG00000093661	eukaryotic translation initiation factor 4E member 3 [Source:MGI Symbol;Acc:MGI:1914142]	Eif4e3	81.6788	87.4671	74.3715	60.1459	73.8483	67.4259		-0.269326	0.00673573	0.000327606
	ENSMUSG00000029093	sortilin-related VPS10 domain containing receptor 2 [Source:MGI Symbol;Acc:MGI:1932289]	Sorcs2	4.82904	4.79488	4.1416	6.86157	5.40982	7.06448		0.538698	0.00677576	0.000330441
	ENSMUSG00000066363	serine (or cysteine) peptidase inhibitor, clade A, member 3F [Source:MGI Symbol;Acc:MGI:2182838]	Serpina3f	25.884	24.1976	22.925	8.93691	24.2438	13.6246		-0.770292	0.00679166	0.000332107
	ENSMUSG00000034022	cleavage and polyadenylation specific factor 1 [Source:MGI Symbol;Acc:MGI:2679722]	Cpsf1	94.3685	90.9758	86.8449	102.682	99.3676	104.872		0.197443	0.00680347	0.000334326
	ENSMUSG00000027466	RanBP-type and C3HC4-type zinc finger containing 1 [Source:MGI Symbol;Acc:MGI:1344372]	Rbck1	158.569	153.762	151.886	178.744	167.696	178.666		0.206928	0.00680347	0.000334468
	ENSMUSG00000053835	histocompatibility 2, T region locus 24 [Source:MGI Symbol;Acc:MGI:95958]	H2-T24	23.8029	21.6381	16.3346	13.916	16.8016	14.7003		-0.507515	0.0068501	0.000338966
	ENSMUSG00000040747	CD53 antigen [Source:MGI Symbol;Acc:MGI:88341]	Cd53	1013.58	1151.68	1005.07	916.303	911.242	862.851		-0.260134	0.0068501	0.000341186
	ENSMUSG00000002984	translocase of outer mitochondrial membrane 40 [Source:MGI Symbol;Acc:MGI:1858259]	Tomm40	54.7557	49.1472	57.3535	56.8328	62.0463	65.1317		0.285973	0.0068501	0.00033796
	ENSMUSG00000092203	RIKEN cDNA 1110038B12 gene [Source:MGI Symbol;Acc:MGI:1916013]	1110038B12Rik	38.003	37.0525	45.978	56.8105	49.2128	49.992		0.403518	0.0068501	0.00034125
	ENSMUSG00000093803	protein phosphatase 2 (formerly 2A), regulatory subunit B'', delta [Source:MGI Symbol;Acc:MGI:1335093]	Ppp2r3d	8.57099	8.66462	10.226	14.5589	10.5394	12.8822		0.53159	0.0068501	0.000341014
	ENSMUSG00000051550	zinc finger protein 579 [Source:MGI Symbol;Acc:MGI:1915740]	Zfp579	5.12402	4.85486	4.61454	7.8893	5.52196	8.08095		0.63094	0.00694012	0.000346645
	ENSMUSG00000068606	predicted gene 4841 [Source:MGI Symbol;Acc:MGI:3643814]	Gm4841	9.22924	8.76986	7.08198	5.56325	6.71644	5.09005		-0.658072	0.00696579	0.00034884
	ENSMUSG00000036278	mono-ADP ribosylhydrolase 1 [Source:MGI Symbol;Acc:MGI:2147583]	Macrod1	15.0781	14.7117	15.7939	27.1724	19.6455	21.8414		0.568785	0.00698382	0.000350659
	ENSMUSG00000001025	S100 calcium binding protein A6 (calcyclin) [Source:MGI Symbol;Acc:MGI:1339467]	S100a6	1250.82	1311.03	1314.06	695.751	1156.05	962.127		-0.408427	0.00704049	0.000355309
	ENSMUSG00000045817	zinc finger protein 36, C3H type-like 2 [Source:MGI Symbol;Acc:MGI:107945]	Zfp36l2	194.472	185.145	193.97	245.201	202.31	222.919		0.242708	0.00704049	0.000356273
	ENSMUSG00000051403	protein phosphatase 1, regulatory subunit 37 [Source:MGI Symbol;Acc:MGI:2687042]	Ppp1r37	20.7971	21.6087	19.4688	28.1988	21.6591	27.3553		0.359476	0.00704049	0.000356
	ENSMUSG00000032386	thyroid hormone receptor interactor 4 [Source:MGI Symbol;Acc:MGI:1928469]	Trip4	15.441	15.4275	12.5327	11.1305	11.835	10.7857		-0.416912	0.00706127	0.00035825
	ENSMUSG00000034636	zyg-ll family member B, cell cycle regulator [Source:MGI Symbol;Acc:MGI:2685277]	Zyg11b	60.6078	58.1179	52.2314	47.5593	49.9954	49.8118		-0.210625	0.00711629	0.000361975
	ENSMUSG00000102051	lymphocyte antigen 6 complex, locus A2 [Source:MGI Symbol;Acc:MGI:3612406]	Ly6a2	27.4349	35.1952	32.5756	8.36284	26.0069	15.9136		-0.927683	0.00726821	0.000370655
	ENSMUSG00000048120	ectonucleoside triphosphate diphosphohydrolase 1 [Source:MGI Symbol;Acc:MGI:102805]	Entpd1	48.1671	44.0481	34.9581	21.3083	40.0435	28.8205		-0.568141	0.00730709	0.000373596
	ENSMUSG00000000682	CD52 antigen [Source:MGI Symbol;Acc:MGI:1346088]	Cd52	2533.01	2580.47	2361.87	1929.72	2330.26	2145.59		-0.211894	0.00731133	0.000374771
	ENSMUSG00000079685	UL16 binding protein 1 [Source:MGI Symbol;Acc:MGI:1925027]	Ulbp1	94.2736	89.8114	79.3663	65.7333	77.9067	73.8294		-0.271636	0.00732016	0.000376183
	ENSMUSG00000007872	inhibitor of DNA binding 3 [Source:MGI Symbol;Acc:MGI:96398]	Id3	24.773	24.7515	26.4775	55.8302	27.8222	39.2421		0.646638	0.00745087	0.000383877
	ENSMUSG00000062619	RIKEN cDNA 2310039H08 gene [Source:MGI Symbol;Acc:MGI:1914351]	2310039H08Rik	28.1198	22.9117	39.445	38.5349	43.9641	41.3762		0.603475	0.00745104	0.000384863
	ENSMUSG00000013155	enkurin domain containing 1 [Source:MGI Symbol;Acc:MGI:2142593]	Enkd1	10.4072	10.4972	11.2118	14.2566	13.0713	13.7629		0.394738	0.00748701	0.000387703
	ENSMUSG00000038147	CD84 antigen [Source:MGI Symbol;Acc:MGI:1336885]	Cd84	44.0967	43.2304	40.1676	40.3796	36.2469	36.1308		-0.211717	0.00750471	0.000389986
	ENSMUSG00000033323	CTD (carboxy-terminal domain, RNA polymerase II, polypeptide A) phosphatase, subunit 1 [Source:MGI Symbol;Acc:MGI:1926953]	Ctdp1	65.4934	67.7149	63.4976	87.8996	70.5373	76.2402		0.236175	0.00750471	0.00039157
	ENSMUSG00000008140	ER membrane protein complex subunit 10 [Source:MGI Symbol;Acc:MGI:1916933]	Emc10	119.527	109.034	115.225	139.251	134.168	134.394		0.258531	0.00750471	0.000391202
	ENSMUSG00000030671	phosphodiesterase 3B, cGMP-inhibited [Source:MGI Symbol;Acc:MGI:1333863]	Pde3b	161.058	169.538	122.568	138.184	125.946	125.582		-0.290107	0.00753938	0.000394368
	ENSMUSG00000026399	CD55 molecule, decay accelerating factor for complement [Source:MGI Symbol;Acc:MGI:104850]	Cd55	21.8603	21.8353	15.0862	12.9263	13.3937	15.0914		-0.481479	0.00759593	0.00040108
	ENSMUSG00000022584	lymphocyte antigen 6 complex, locus C2 [Source:MGI Symbol;Acc:MGI:3712069]	Ly6c2	921.633	916.928	827.029	425.053	791.801	657.127		-0.472227	0.00759593	0.000402161
	ENSMUSG00000058587	tropomodulin 3 [Source:MGI Symbol;Acc:MGI:1355315]	Tmod3	105.205	104.219	92.192	84.0153	92.4806	87.8369		-0.198906	0.00759593	0.00040156
	ENSMUSG00000006307	lysine (K)-specific methyltransferase 2B [Source:MGI Symbol;Acc:MGI:109565]	Kmt2b	57.4375	54.3914	57.1636	72.1878	61.7311	63.7385		0.220537	0.00759593	0.000400748
	ENSMUSG00000067847	reactive oxygen species modulator 1 [Source:MGI Symbol;Acc:MGI:1914317]	Romo1	84.4943	84.9513	131.45	116.288	134.541	132.63		0.541312	0.00759593	0.000402305
	ENSMUSG00000050271	PEAK1 related kinase activating pseudokinase 1 [Source:MGI Symbol;Acc:MGI:1196223]	Prag1	10.8864	9.87761	11.7126	15.5503	12.5571	13.6758		0.38779	0.00767176	0.000407327
	ENSMUSG00000034681	RNA binding protein with serine rich domain 1 [Source:MGI Symbol;Acc:MGI:97960]	Rnps1	77.9603	72.638	80.705	85.6466	85.576	88.2667		0.221772	0.00768332	0.000408948
	ENSMUSG00000060802	beta-2 microglobulin [Source:MGI Symbol;Acc:MGI:88127]	B2m	11488.3	11762.7	9653.9	8479.54	9584.21	9580.17		-0.23848	0.00773537	0.000412732
	ENSMUSG00000036769	WD repeat domain 44 [Source:MGI Symbol;Acc:MGI:1919654]	Wdr44	33.069	32.8239	25.5167	25.0334	28.5409	24.6917		-0.297574	0.00774198	0.000415115
	ENSMUSG00000063511	small nuclear ribonucleoprotein 70 (U1) [Source:MGI Symbol;Acc:MGI:98341]	Snrnp70	151.795	147.052	144.052	184.958	149.462	172.791		0.216633	0.00774198	0.000414378
	ENSMUSG00000053898	enoyl coenzyme A hydratase 1, peroxisomal [Source:MGI Symbol;Acc:MGI:1858208]	Ech1	126.497	131.874	124.396	107.086	115.449	105.352		-0.235881	0.0077427	0.000416168
	ENSMUSG00000020440	ADP-ribosylation factor 5 [Source:MGI Symbol;Acc:MGI:99434]	Arf5	240.538	230.787	273.962	288.475	284.776	289.961		0.282176	0.00779625	0.000420069
	ENSMUSG00000021520	ubiquinol-cytochrome c reductase binding protein [Source:MGI Symbol;Acc:MGI:1914780]	Uqcrb	219.346	220.963	212.362	154.903	200.474	176.084		-0.282412	0.00786728	0.000424927
	ENSMUSG00000048707	taperin [Source:MGI Symbol;Acc:MGI:2139535]	Tprn	22.7583	21.5917	20.7798	27.7306	24.8998	26.8086		0.295159	0.00797426	0.000431751
	ENSMUSG00000033701	acyl-Coenzyme A binding domain containing 6 [Source:MGI Symbol;Acc:MGI:1919732]	Acbd6	17.2522	16.7507	18.836	20.8387	19.2477	21.0026		0.277416	0.00799152	0.000434722
	ENSMUSG00000027765	purinergic receptor P2Y, G-protein coupled 1 [Source:MGI Symbol;Acc:MGI:105049]	P2ry1	3.71801	2.97191	4.23594	5.7544	5.13114	6.35264		0.805056	0.00799152	0.000434781
	ENSMUSG00000037613	tumor necrosis factor receptor superfamily, member 23 [Source:MGI Symbol;Acc:MGI:1930269]	Tnfrsf23	9.84644	8.19999	5.45909	3.31263	6.24855	4.91834		-0.749858	0.00808608	0.000447492
	ENSMUSG00000029569	transmembrane protein 168 [Source:MGI Symbol;Acc:MGI:1921794]	Tmem168	44.7218	44.3065	38.0377	35.3058	37.8348	35.6709		-0.249057	0.00808608	0.000442084
	ENSMUSG00000028670	lysophospholipase 2 [Source:MGI Symbol;Acc:MGI:1347000]	Lypla2	220.886	204.218	234.629	244.166	244.803	256.738		0.25108	0.00808608	0.000442334
	ENSMUSG00000027806	TSC22 domain family, member 2 [Source:MGI Symbol;Acc:MGI:1919283]	Tsc22d2	8.08871	8.10111	7.7576	11.0593	8.72278	9.58048		0.277582	0.00808608	0.000447055
	ENSMUSG00000025409	methyl-CpG binding domain protein 6 [Source:MGI Symbol;Acc:MGI:106378]	Mbd6	35.3148	33.0551	30.771	40.9201	35.0214	42.7086		0.307664	0.00808608	0.000446091
	ENSMUSG00000030595	nuclear factor of kappa light polypeptide gene enhancer in B cells inhibitor, beta [Source:MGI Symbol;Acc:MGI:104752]	Nfkbib	43.1127	37.8662	49.5315	47.6901	53.7668	56.2767		0.400906	0.00808608	0.000443377
	ENSMUSG00000036304	zinc finger, DHHC domain containing 23 [Source:MGI Symbol;Acc:MGI:2685625]	Zdhhc23	4.15047	4.65642	4.5761	6.76579	4.63921	6.69678		0.535923	0.00808608	0.000448406
	ENSMUSG00000049539	H1.1 linker histone, cluster member [Source:MGI Symbol;Acc:MGI:1931523]	H1f1	0.471468	1.02439	1.09629	3.75255	1.4217	6.20504		2.51514	0.00808608	0.000444581
	ENSMUSG00000020471	polymerase (DNA directed), delta 2, regulatory subunit [Source:MGI Symbol;Acc:MGI:1097163]	Pold2	143.969	140.124	159.118	165.783	168.19	173.277		0.26681	0.00811368	0.000451
	ENSMUSG00000084806	predicted gene 15232 [Source:MGI Symbol;Acc:MGI:3705117]	Gm15232	11.2032	11.265	9.6375	7.10156	7.58978	7.50926		-0.528077	0.00821296	0.000463037
	ENSMUSG00000021591	glutaredoxin [Source:MGI Symbol;Acc:MGI:2135625]	Glrx	44.1307	39.2663	38.019	20.1032	37.7749	28.2554		-0.510767	0.00821296	0.00046223
	ENSMUSG00000026483	niban apoptosis regulator 1 [Source:MGI Symbol;Acc:MGI:2137237]	Niban1	32.3006	31.3092	25.7025	24.0838	25.1665	21.1384		-0.452459	0.00821296	0.000459655
	ENSMUSG00000031826	ubiquitin specific peptidase 10 [Source:MGI Symbol;Acc:MGI:894652]	Usp10	31.1507	29.175	30.8382	36.1521	33.2167	34.976		0.222222	0.00821296	0.000463993
	ENSMUSG00000013787	euchromatic histone lysine N-methyltransferase 2 [Source:MGI Symbol;Acc:MGI:2148922]	Ehmt2	84.2048	84.9654	82.8041	106.808	90.0899	101.517		0.270507	0.00821296	0.000458534
	ENSMUSG00000050212	eva-1 homolog B (C. elegans) [Source:MGI Symbol;Acc:MGI:1922063]	Eva1b	8.27521	6.80118	13.9087	14.6621	11.7174	14.3185		0.739158	0.00821296	0.000464056
	ENSMUSG00000076137	NA	NA	17.9972	22.0822	27.6939	56.624	34.4775	84.594		1.71413	0.00821296	0.000460615
	ENSMUSG00000028042	zinc finger and BTB domain containing 7B [Source:MGI Symbol;Acc:MGI:102755]	Zbtb7b	6.97757	6.84267	5.48495	3.58087	6.01073	4.03358		-0.620523	0.00822865	0.000468178
	ENSMUSG00000034889	cactin, spliceosome C complex subunit [Source:MGI Symbol;Acc:MGI:1917562]	Cactin	67.9443	63.666	66.9691	74.2941	79.7899	78.4054		0.262657	0.00822865	0.000467315
	ENSMUSG00000002578	IKAROS family zinc finger 4 [Source:MGI Symbol;Acc:MGI:1343139]	Ikzf4	7.94855	8.83491	8.84838	13.4449	8.85373	11.3524		0.422049	0.00822865	0.000467374
	ENSMUSG00000002210	smg-9 homolog, nonsense mediated mRNA decay factor (C. elegans) [Source:MGI Symbol;Acc:MGI:1919247]	Smg9	44.6685	48.1444	44.957	52.2178	49.4868	55.9201		0.2603	0.00823011	0.00046934
	ENSMUSG00000043592	unc-5 family C-terminal like [Source:MGI Symbol;Acc:MGI:1923839]	Unc5cl	13.2923	12.9024	11.7166	8.96982	9.47609	9.57563		-0.419184	0.00823453	0.000479092
	ENSMUSG00000000817	Fas ligand (TNF superfamily, member 6) [Source:MGI Symbol;Acc:MGI:99255]	Fasl	138.396	168.117	135.567	111.053	132.977	114.731		-0.32374	0.00823453	0.000479506
	ENSMUSG00000071180	small integral membrane protein 15 [Source:MGI Symbol;Acc:MGI:1922866]	Smim15	153.16	145.627	142.98	128.504	131.446	124.944		-0.209326	0.00823453	0.000474039
	ENSMUSG00000006782	2',3'-cyclic nucleotide 3' phosphodiesterase [Source:MGI Symbol;Acc:MGI:88437]	Cnp	203.624	201.961	176.914	173.273	174.248	171.357		-0.184702	0.00823453	0.000480387
	ENSMUSG00000020238	nicalin [Source:MGI Symbol;Acc:MGI:1926081]	Ncln	72.9635	66.8599	66.729	87.9855	74.154	81.8611		0.24643	0.00823453	0.000476976
	ENSMUSG00000070000	FCH domain only 1 [Source:MGI Symbol;Acc:MGI:1921265]	Fcho1	127.428	117.217	121.753	145.761	123.79	148.319		0.253127	0.00823453	0.000475838
	ENSMUSG00000041130	zinc finger protein 598 [Source:MGI Symbol;Acc:MGI:2670965]	Zfp598	63.1445	57.7637	61.8651	73.8744	65.0209	73.0486		0.260398	0.00823453	0.000479956
	ENSMUSG00000041375	coiled-coil domain containing 9 [Source:MGI Symbol;Acc:MGI:1921443]	Ccdc9	28.2726	27.7606	32.1763	35.8096	31.9085	34.4705		0.275436	0.00823453	0.000476069
	ENSMUSG00000037805	ribosomal protein L10A [Source:MGI Symbol;Acc:MGI:1343877]	Rpl10a	609.951	615.503	775.303	799.947	744.673	767.628		0.297334	0.00823453	0.000476403
	ENSMUSG00000020601	tribbles pseudokinase 2 [Source:MGI Symbol;Acc:MGI:2145021]	Trib2	17.2463	17.8956	17.3808	37.2805	20.8995	26.6679		0.628614	0.00823453	0.000473239
	ENSMUSG00000024773	autophagy related 2A [Source:MGI Symbol;Acc:MGI:1916291]	Atg2a	25.0222	25.6741	21.2909	38.5451	26.5527	29.9123		0.319111	0.00824178	0.000481891
	ENSMUSG00000024833	polymerase (DNA directed), alpha 2 [Source:MGI Symbol;Acc:MGI:99690]	Pola2	41.5882	40.6536	38.125	46.0513	44.3925	46.7385		0.20795	0.00832086	0.000487605
	ENSMUSG00000030124	lymphocyte-activation gene 3 [Source:MGI Symbol;Acc:MGI:106588]	Lag3	36.1671	32.3929	32.8851	67.8218	47.2542	43.1877		0.463199	0.00834082	0.000489869
	ENSMUSG00000025473	a disintegrin and metallopeptidase domain 8 [Source:MGI Symbol;Acc:MGI:107825]	Adam8	49.3379	50.4413	41.3139	10.9835	42.2936	25.9878		-0.909143	0.00838596	0.000496917
	ENSMUSG00000069874	immunity-related GTPase family M member 2 [Source:MGI Symbol;Acc:MGI:1926262]	Irgm2	164.391	166.009	119.734	119.153	142.462	112.56		-0.391924	0.00838596	0.000495526
	ENSMUSG00000068735	transformation related protein 53 inducible protein 11 [Source:MGI Symbol;Acc:MGI:2670995]	Trp53i11	71.7651	67.2264	67.8062	80.5708	77.9403	77.6706		0.193652	0.00838596	0.000496323
	ENSMUSG00000079019	insulin-like 3 [Source:MGI Symbol;Acc:MGI:108427]	Insl3	2.24307	2.43684	3.42284	5.53451	5.41113	5.62309		1.15283	0.00838596	0.000495397
	ENSMUSG00000040258	neurexophilin 4 [Source:MGI Symbol;Acc:MGI:1336197]	Nxph4	0.625715	0.271907	0.424364	0.863244	0.88052	2.0261		1.79566	0.00841335	0.000499643
	ENSMUSG00000035632	CCR4-NOT transcription complex, subunit 3 [Source:MGI Symbol;Acc:MGI:2385261]	Cnot3	58.5611	54.2607	53.6707	66.3391	61.9911	63.5748		0.206105	0.00842819	0.00050163
	ENSMUSG00000075602	lymphocyte antigen 6 complex, locus A [Source:MGI Symbol;Acc:MGI:107527]	Ly6a	570.762	601.716	460.53	101.626	466.503	295.99		-0.991007	0.00850583	0.000507455
	ENSMUSG00000047407	TGFB-induced factor homeobox 1 [Source:MGI Symbol;Acc:MGI:1194497]	Tgif1	29.9568	31.8474	36.5559	57.5408	29.9282	48.7721		0.554021	0.00850583	0.000508481
	ENSMUSG00000024789	Janus kinase 2 [Source:MGI Symbol;Acc:MGI:96629]	Jak2	112.308	117.709	87.3724	91.9215	88.8022	89.9302		-0.269794	0.00855772	0.000512704
	ENSMUSG00000032336	neuroplastin [Source:MGI Symbol;Acc:MGI:108077]	Nptn	111.487	113.024	99.2723	94.4012	106.885	89.8444		-0.219915	0.0085731	0.000514789
	ENSMUSG00000003346	abhydrolase domain containing 17A [Source:MGI Symbol;Acc:MGI:106388]	Abhd17a	94.4718	94.8966	112.769	118.128	121.351	126.317		0.374884	0.0085731	0.000515874
	ENSMUSG00000045252	zinc finger protein 574 [Source:MGI Symbol;Acc:MGI:2442951]	Zfp574	17.2885	17.5195	16.7642	22.839	20.5072	20.2539		0.275082	0.00860956	0.000519196
	ENSMUSG00000029804	hect domain and RLD 3 [Source:MGI Symbol;Acc:MGI:1921248]	Herc3	53.869	54.4917	43.991	42.8841	45.9851	43.2884		-0.241841	0.00861782	0.000520824
	ENSMUSG00000054452	TLE family member 5, transcriptional modulator [Source:MGI Symbol;Acc:MGI:95806]	Tle5	462.073	442.467	461.853	513.76	486.673	517.361		0.195581	0.00869667	0.00052673
	ENSMUSG00000040010	solute carrier family 7 (cationic amino acid transporter, y+ system), member 5 [Source:MGI Symbol;Acc:MGI:1298205]	Slc7a5	182.656	171.713	197.31	200.104	230.754	213.044		0.272664	0.00875952	0.000531685
	ENSMUSG00000042082	arylsulfatase B [Source:MGI Symbol;Acc:MGI:88075]	Arsb	124.207	122.719	111.048	69.2743	116.516	93.3898		-0.357052	0.00888596	0.000540728
	ENSMUSG00000035199	ADP-ribosylation factor-like 6 interacting protein 5 [Source:MGI Symbol;Acc:MGI:1929501]	Arl6ip5	530.982	535.037	490.116	443.746	478.157	440.176		-0.213264	0.00888596	0.000544019
	ENSMUSG00000024962	vascular endothelial growth factor B [Source:MGI Symbol;Acc:MGI:106199]	Vegfb	22.8552	20.5257	21.9538	29.383	26.1237	28.7158		0.39669	0.00888596	0.000543437
	ENSMUSG00000042419	nuclear factor of kappa light polypeptide gene enhancer in B cells inhibitor like 1 [Source:MGI Symbol;Acc:MGI:1340031]	Nfkbil1	19.6755	16.6075	22.5072	28.8575	23.833	29.0302		0.586919	0.00888596	0.000542501
	ENSMUSG00000060279	adaptor-related protein complex 2, alpha 1 subunit [Source:MGI Symbol;Acc:MGI:101921]	Ap2a1	72.661	68.4579	68.7903	78.246	77.786	80.171		0.198698	0.0089078	0.000546524
	ENSMUSG00000109713	poliovirus receptor related immunoglobulin domain containing [Source:MGI Symbol;Acc:MGI:5596028]	Pvrig	29.5444	28.9573	29.429	10.0927	20.777	15.7116		-0.886429	0.00891173	0.000549102
	ENSMUSG00000030814	B cell CLL/lymphoma 7C [Source:MGI Symbol;Acc:MGI:1332237]	Bcl7c	11.255	9.31238	11.3046	13.6915	14.6746	12.9453		0.364519	0.00891173	0.000548587
	ENSMUSG00000038024	DENN/MADD domain containing 4C [Source:MGI Symbol;Acc:MGI:1914769]	Dennd4c	48.0253	49.0418	36.8849	38.1199	40.1793	33.4929		-0.382525	0.00898105	0.000555815
	ENSMUSG00000035093	SECIS binding protein 2-like [Source:MGI Symbol;Acc:MGI:1917604]	Secisbp2l	44.9834	43.2438	38.3847	36.5251	38.9257	35.1112		-0.244187	0.00898105	0.000554707
	ENSMUSG00000046432	brain expressed X-linked 3 [Source:MGI Symbol;Acc:MGI:1338016]	Bex3	165.403	149.63	164.683	185.186	192.506	182.72		0.237117	0.00898105	0.000556905
	ENSMUSG00000029699	scavenger receptor cysteine rich family, 4 domains [Source:MGI Symbol;Acc:MGI:1924709]	Ssc4d	8.17829	8.26412	7.50663	4.74653	6.54885	5.29716		-0.555075	0.00900353	0.000567742
	ENSMUSG00000062761	zinc finger protein 512 [Source:MGI Symbol;Acc:MGI:1917345]	Zfp512	30.2716	30.2704	26.9418	23.2757	27.3238	23.418		-0.284062	0.00900353	0.00056492
	ENSMUSG00000000804	ubiquitin specific peptidase 32 [Source:MGI Symbol;Acc:MGI:2144475]	Usp32	25.292	26.1327	21.6707	22.81	22.1532	20.2414		-0.237576	0.00900353	0.000563607
	ENSMUSG00000022024	SGT1, suppressor of G2 allele of SKP1 (S. cerevisiae) [Source:MGI Symbol;Acc:MGI:1915205]	Sugt1	58.8839	61.2949	57.7963	49.3036	53.7961	49.3282		-0.231021	0.00900353	0.000566712
	ENSMUSG00000027551	zinc finger protein 64 [Source:MGI Symbol;Acc:MGI:107342]	Zfp64	13.9908	13.8527	15.2196	18.4562	16.8578	17.5921		0.335069	0.00900353	0.000564851
	ENSMUSG00000045216	heparan sulfate 6-O-sulfotransferase 1 [Source:MGI Symbol;Acc:MGI:1354958]	Hs6st1	7.48053	7.64279	7.32907	9.35243	8.34496	9.71878		0.34708	0.00900353	0.000563884
	ENSMUSG00000036622	ATPase type 13A2 [Source:MGI Symbol;Acc:MGI:1922022]	Atp13a2	7.64705	6.70516	6.53268	11.1411	8.44539	9.67025		0.458814	0.00900353	0.000566653
	ENSMUSG00000028051	hyperpolarization-activated, cyclic nucleotide-gated K+ 3 [Source:MGI Symbol;Acc:MGI:1298211]	Hcn3	1.31759	1.24259	1.32003	4.41797	2.00349	2.55634		1.03671	0.00900353	0.000563134
	ENSMUSG00000109501	predicted gene 14377 [Source:MGI Symbol;Acc:MGI:3651179]	Gm14377	0.834187	0.579999	0.775887	0.265582	0.452785	0.15684		-1.69093	0.0090396	0.000574756
	ENSMUSG00000047867	GTPase, IMAP family member 6 [Source:MGI Symbol;Acc:MGI:1918876]	Gimap6	459.281	517.76	431.882	441.403	404.125	378.245		-0.271757	0.0090396	0.000574138
	ENSMUSG00000051510	v-maf musculoaponeurotic fibrosarcoma oncogene family, protein G (avian) [Source:MGI Symbol;Acc:MGI:96911]	Mafg	12.6764	15.4709	14.2194	19.3203	14.6207	19.3282		0.426288	0.0090396	0.000574322
	ENSMUSG00000078440	deoxyhypusine hydroxylase/monooxygenase [Source:MGI Symbol;Acc:MGI:1915964]	Dohh	7.16456	7.04219	8.52813	9.99294	10.2364	10.6374		0.534639	0.0090396	0.000573537
	ENSMUSG00000091649	PHD finger protein 11B [Source:MGI Symbol;Acc:MGI:3645789]	Phf11b	91.4703	99.5003	86.1067	76.7495	74.2062	74.3391		-0.303115	0.00905905	0.000577181
	ENSMUSG00000030924	RNA exonuclease 5 [Source:MGI Symbol;Acc:MGI:1919402]	Rexo5	47.0973	44.827	37.819	38.5173	36.4158	35.3469		-0.290717	0.0090922	0.000580485
	ENSMUSG00000035919	Bardet-Biedl syndrome 9 (human) [Source:MGI Symbol;Acc:MGI:2442833]	Bbs9	13.8221	17.2655	15.1918	6.91264	11.8459	10.6792		-0.545548	0.00914201	0.000586062
	ENSMUSG00000033313	F-box and leucine-rich repeat protein 8 [Source:MGI Symbol;Acc:MGI:1354697]	Fbxl8	30.013	27.6486	32.7858	35.5415	34.1642	39.2505		0.377456	0.00914201	0.000585391
	ENSMUSG00000070808	BRD4 interacting chromatin remodeling complex associated protein [Source:MGI Symbol;Acc:MGI:2154263]	Bicra	18.2576	17.0722	16.5468	21.2619	20.3771	20.4722		0.252575	0.00918868	0.000590258
	ENSMUSG00000058709	egl-9 family hypoxia-inducible factor 2 [Source:MGI Symbol;Acc:MGI:1932287]	Egln2	46.4562	40.0141	50.9172	58.3538	50.9056	54.4245		0.305712	0.00923718	0.000594585
	ENSMUSG00000031158	translocase of inner mitochondrial membrane 17b [Source:MGI Symbol;Acc:MGI:1343176]	Timm17b	27.0523	26.955	30.2607	35.5383	33.7015	33.78		0.325182	0.00932666	0.000601567
	ENSMUSG00000024027	glucagon-like peptide 1 receptor [Source:MGI Symbol;Acc:MGI:99571]	Glp1r	0.0601201	0	0.0873724	0.172265	0.19942	0.22607		2.62321	0.00935531	0.000604641
	ENSMUSG00000036155	mannoside acetylglucosaminyltransferase 5 [Source:MGI Symbol;Acc:MGI:894701]	Mgat5	21.0929	18.9418	15.2647	11.3809	15.4168	13.9782		-0.449636	0.0094367	0.000612376
	ENSMUSG00000052298	CDC42 small effector 2 [Source:MGI Symbol;Acc:MGI:1919979]	Cdc42se2	257.08	256.729	224.806	212.851	217.919	217.843		-0.190547	0.0094367	0.000611562
	ENSMUSG00000013833	mediator complex subunit 16 [Source:MGI Symbol;Acc:MGI:2158394]	Med16	33.8394	29.9853	35.9967	39.9773	39.7399	40.3105		0.321285	0.00945093	0.000615372
	ENSMUSG00000040596	pogo transposable element with KRAB domain [Source:MGI Symbol;Acc:MGI:1918842]	Pogk	10.2774	11.767	10.5506	19.0056	12.1986	13.5216		0.374225	0.00945093	0.000615778
	ENSMUSG00000051723	ribosomal protein L31, pseudogene 13 [Source:MGI Symbol;Acc:MGI:3809036]	Rpl31-ps13	6.77766	10.0407	11.2827	15.0066	13.9349	17.6665		0.966276	0.0095213	0.000621611
	ENSMUSG00000056493	forkhead box K1 [Source:MGI Symbol;Acc:MGI:1347488]	Foxk1	89.1359	78.1294	80.1348	99.1264	96.9162	95.617		0.234891	0.00952342	0.000624246
	ENSMUSG00000025511	tetraspanin 4 [Source:MGI Symbol;Acc:MGI:1928097]	Tspan4	19.9236	20.1369	22.5263	26.2135	27.3799	25.2957		0.356221	0.00952342	0.000623141
	ENSMUSG00000026384	protein tyrosine phosphatase, non-receptor type 4 [Source:MGI Symbol;Acc:MGI:1099792]	Ptpn4	53.6334	44.3872	38.3269	40.6744	35.1656	37.0749		-0.321255	0.00957242	0.000628713
	ENSMUSG00000021785	N-glycanase 1 [Source:MGI Symbol;Acc:MGI:1913276]	Ngly1	70.673	70.7532	59.7437	61.7888	60.5594	56.9326		-0.223056	0.00960284	0.00063255
	ENSMUSG00000028851	nudC nuclear distribution protein [Source:MGI Symbol;Acc:MGI:106014]	Nudc	262.978	257.925	285.82	287.626	306.211	311.753		0.241481	0.00960284	0.000633229
	ENSMUSG00000050241	killer cell lectin-like receptor family E member 1 [Source:MGI Symbol;Acc:MGI:2662547]	Klre1	4.93273	7.51688	4.7953	1.94183	3.76889	3.19588		-0.864771	0.00961604	0.00063536
	ENSMUSG00000038393	thioredoxin interacting protein [Source:MGI Symbol;Acc:MGI:1889549]	Txnip	491.427	515.14	457.29	471.365	442.036	413.43		-0.199173	0.00961824	0.000636766
	ENSMUSG00000006736	tetraspanin 31 [Source:MGI Symbol;Acc:MGI:1914375]	Tspan31	84.9631	83.2109	68.2055	53.4573	61.8733	63.2486		-0.37709	0.00965034	0.000640156
	ENSMUSG00000002428	helicase-like transcription factor [Source:MGI Symbol;Acc:MGI:1196437]	Hltf	49.754	54.0861	44.8911	48.4397	42.0788	41.8628		-0.223501	0.00966437	0.000642354
	ENSMUSG00000046157	transmembrane protein 229B [Source:MGI Symbol;Acc:MGI:2444389]	Tmem229b	109.217	104.493	95.2996	81.0688	95.864	88.0285		-0.226621	0.00974422	0.000648939
	ENSMUSG00000026919	lipocalin 4 [Source:MGI Symbol;Acc:MGI:102668]	Lcn4	72.9709	55.7047	61.3988	27.4472	43.1464	41.5834		-0.671097	0.00976342	0.000651498
	ENSMUSG00000022013	DnaJ heat shock protein family (Hsp40) member C15 [Source:MGI Symbol;Acc:MGI:1913398]	Dnajc15	92.4039	92.329	111.678	57.0901	86.1644	71.8232		-0.378599	0.00984579	0.00066158
	ENSMUSG00000024696	leupaxin [Source:MGI Symbol;Acc:MGI:2147677]	Lpxn	363.345	370.547	330.558	307.766	313.219	316.375		-0.175562	0.00984579	0.000662157
	ENSMUSG00000002625	A kinase (PRKA) anchor protein 8-like [Source:MGI Symbol;Acc:MGI:1860606]	Akap8l	23.8277	24.5693	23.5395	36.8341	23.5076	30.5786		0.336194	0.00984579	0.000658916
	ENSMUSG00000031176	dynein light chain Tctex-type 3 [Source:MGI Symbol;Acc:MGI:1914367]	Dynlt3	16.3196	18.5054	18.3694	26.727	25.3555	21.9289		0.424529	0.00984579	0.000661725
	ENSMUSG00000004996	methylthioribose-1-phosphate isomerase 1 [Source:MGI Symbol;Acc:MGI:1915123]	Mri1	35.2951	36.2259	37.1057	48.7653	39.3325	42.3114		0.264919	0.00987495	0.000665412
	ENSMUSG00000032741	two pore channel 1 [Source:MGI Symbol;Acc:MGI:2182472]	Tpcn1	31.0604	27.1982	24.768	37.5397	31.1487	34.2318		0.282372	0.0099034	0.000668628
	ENSMUSG00000104835	predicted gene 5547 [Source:MGI Symbol;Acc:MGI:3648206]	Gm5547	39.889	46.2873	38.3498	29.1671	29.6085	31.7298		-0.409154	0.00992086	0.000671107
	ENSMUSG00000037860	absent in melanoma 2 [Source:MGI Symbol;Acc:MGI:2686159]	Aim2	62.3675	63.0069	55.5723	37.5518	45.7079	50.813		-0.333794	0.00992877	0.000672944
	ENSMUSG00000026478	laminin, gamma 1 [Source:MGI Symbol;Acc:MGI:99914]	Lamc1	12.7968	11.7458	13.1841	18.3808	17.333	14.5975		0.3353	0.00996595	0.00067677
	ENSMUSG00000024393	proline-rich coiled-coil 2A [Source:MGI Symbol;Acc:MGI:1915467]	Prrc2a	247.28	223.415	239.123	267.431	284.112	264.354		0.206953	0.00997692	0.00068043
	ENSMUSG00000053293	nuclear pore membrane protein 121 [Source:MGI Symbol;Acc:MGI:2137624]	Pom121	88.1324	77.5126	76.6495	97.9105	96.1536	94.4856		0.239522	0.00997692	0.000681337
	ENSMUSG00000001082	major facilitator superfamily domain containing 10 [Source:MGI Symbol;Acc:MGI:1915544]	Mfsd10	49.4139	46.6356	46.6317	50.5012	52.856	58.2553		0.254475	0.00997692	0.000681439
	ENSMUSG00000028874	FGR proto-oncogene, Src family tyrosine kinase [Source:MGI Symbol;Acc:MGI:95527]	Fgr	12.7817	13.9907	11.5923	8.75294	10.8539	9.8904		-0.370699	0.0100312	0.000686459
	ENSMUSG00000026765	LY6/PLAUR domain containing 6B [Source:MGI Symbol;Acc:MGI:1919147]	Lypd6b	7.60251	9.0949	5.45937	4.31405	6.06843	4.37226		-0.707398	0.0100585	0.000692288
	ENSMUSG00000024300	myosin IF [Source:MGI Symbol;Acc:MGI:107711]	Myo1f	190.495	175.885	144.45	110.711	153.147	141.942		-0.320687	0.0100585	0.000692253
	ENSMUSG00000037944	chemokine (C-C motif) receptor 7 [Source:MGI Symbol;Acc:MGI:103011]	Ccr7	222.19	232.865	220.235	407.059	260.92	299.533		0.449636	0.0100585	0.000690147
	ENSMUSG00000049775	thymosin, beta 4, X chromosome [Source:MGI Symbol;Acc:MGI:99510]	Tmsb4x	10980.8	11149.6	11627.9	7696.15	10071.6	9059		-0.279816	0.0100885	0.000699638
	ENSMUSG00000026875	TNF receptor-associated factor 1 [Source:MGI Symbol;Acc:MGI:101836]	Traf1	58.6422	58.822	47.7036	49.8933	45.4887	46.4637		-0.261978	0.0100885	0.00069672
	ENSMUSG00000084349	ribosomal protein L3, pseudogene 1 [Source:MGI Symbol;Acc:MGI:3644217]	Rpl3-ps1	23.7717	24.466	25.0084	33.3677	25.9452	34.109		0.441238	0.0100885	0.00069747
	ENSMUSG00000041734	kirre like nephrin family adhesion molecule 1 [Source:MGI Symbol;Acc:MGI:1891396]	Kirrel	0.0936239	0.0813693	0.0952445	2.65284	0.352901	0.396062		2.38259	0.0100885	0.000698713
	ENSMUSG00000029276	glomulin, FKBP associated protein [Source:MGI Symbol;Acc:MGI:2141180]	Glmn	46.3557	42.0202	45.9367	29.9995	43.699	33.1926		-0.354088	0.0101272	0.000704981
	ENSMUSG00000011008	mucolipin 2 [Source:MGI Symbol;Acc:MGI:1915529]	Mcoln2	44.6614	44.7872	37.7702	35.2824	37.9035	33.1287		-0.326104	0.0101272	0.000703743
	ENSMUSG00000056144	tripartite motif-containing 34A [Source:MGI Symbol;Acc:MGI:2137359]	Trim34a	54.7668	51.1907	46.4627	42.4391	43.2447	41.4753		-0.288834	0.0101531	0.000708112
	ENSMUSG00000059363	frataxin [Source:MGI Symbol;Acc:MGI:1096879]	Fxn	28.3616	28.6178	30.5177	32.3979	35.0476	35.9405		0.315138	0.01017	0.000710625
	ENSMUSG00000057691	zinc finger protein 746 [Source:MGI Symbol;Acc:MGI:1916478]	Zfp746	21.767	23.147	22.6299	27.7338	24.5781	25.4456		0.211128	0.010178	0.000712521
	ENSMUSG00000063382	B cell CLL/lymphoma 9-like [Source:MGI Symbol;Acc:MGI:1933114]	Bcl9l	63.7591	51.2503	54.8095	63.7483	62.4606	74.1465		0.331633	0.0101891	0.000715969
	ENSMUSG00000051246	Myb/SANT-like DNA-binding domain containing 1 [Source:MGI Symbol;Acc:MGI:2684990]	Msantd1	0.440956	0.10452	0.734054	0.804041	0.725287	1.39434		1.95023	0.0101891	0.000715336
	ENSMUSG00000009566	folylpolyglutamyl synthetase [Source:MGI Symbol;Acc:MGI:95576]	Fpgs	18.4082	20.0849	25.6131	25.51	26.5448	25.9721		0.394059	0.0102919	0.000724542
	ENSMUSG00000044030	interferon regulatory factor 2 binding protein 1 [Source:MGI Symbol;Acc:MGI:2442159]	Irf2bp1	31.0086	26.0984	32.2758	44.0591	36.2206	37.239		0.391522	0.0102954	0.000726137
	ENSMUSG00000086841	RIKEN cDNA 2410006H16 gene [Source:MGI Symbol;Acc:MGI:1916471]	2410006H16Rik	265.925	299.358	440.464	578.277	394.713	408.515		0.512188	0.0103322	0.00073009
	ENSMUSG00000025809	integrin beta 1 (fibronectin receptor beta) [Source:MGI Symbol;Acc:MGI:96610]	Itgb1	487.839	444.21	431.83	370.907	457.687	358.736		-0.272433	0.0103403	0.000732016
	ENSMUSG00000038214	BEN domain containing 3 [Source:MGI Symbol;Acc:MGI:2677212]	Bend3	9.64888	8.94993	12.0322	14.207	12.0813	12.2976		0.379234	0.0103564	0.000734511
	ENSMUSG00000037563	ribosomal protein S16 [Source:MGI Symbol;Acc:MGI:98118]	Rps16	1580.48	1501.48	1861	1978.43	1785.09	1869.11		0.259381	0.010371	0.000736907
	ENSMUSG00000071724	sphingomyelin phosphodiesterase 5 [Source:MGI Symbol;Acc:MGI:3709877]	Smpd5	51.3171	48.6034	47.9134	39.0765	40.8842	39.3782		-0.306416	0.0104182	0.000741624
	ENSMUSG00000028822	transmembrane protein 50A [Source:MGI Symbol;Acc:MGI:1919067]	Tmem50a	438.76	453.054	410.414	366.607	388.294	386.178		-0.173943	0.01042	0.000743238
	ENSMUSG00000020087	trypsin domain containing 1 [Source:MGI Symbol;Acc:MGI:1919017]	Tysnd1	33.8762	32.0764	37.8014	42.8652	41.0608	43.2918		0.362857	0.01042	0.000744485
	ENSMUSG00000047242	TATA-box binding protein associated factor 9B [Source:MGI Symbol;Acc:MGI:3039562]	Taf9b	42.7755	40.3333	37.8138	27.2253	34.4599	32.9325		-0.317386	0.010457	0.000749852
	ENSMUSG00000030397	MAP/microtubule affinity regulating kinase 4 [Source:MGI Symbol;Acc:MGI:1920955]	Mark4	19.1587	18.9167	15.7624	24.2888	19.4232	22.6116		0.289235	0.010457	0.000750245
	ENSMUSG00000024121	ATPase, H+ transporting, lysosomal V0 subunit C [Source:MGI Symbol;Acc:MGI:88116]	Atp6v0c	21.095	20.1433	20.7649	23.5664	27.0219	25.557		0.325627	0.010457	0.000751242
	ENSMUSG00000064215	interferon, alpha-inducible protein 27 [Source:MGI Symbol;Acc:MGI:1277180]	Ifi27	241.955	244.332	251.68	194.626	222.904	201.711		-0.236284	0.0104683	0.000753523
	ENSMUSG00000046269	ubiquitin specific peptidase 27, X chromosome [Source:MGI Symbol;Acc:MGI:1859645]	Usp27x	0.544298	0.851497	0.759386	2.31341	1.37871	1.40713		1.13948	0.0104683	0.000754803
	ENSMUSG00000051359	neurocalcin delta [Source:MGI Symbol;Acc:MGI:1196326]	Ncald	5.86266	6.75834	5.49079	4.2126	4.57928	4.68211		-0.386154	0.0105777	0.000764076
	ENSMUSG00000038517	TBK1 binding protein 1 [Source:MGI Symbol;Acc:MGI:1920424]	Tbkbp1	2.87103	3.0172	2.29911	6.18387	3.94889	4.07603		0.619972	0.0106314	0.000769346
	ENSMUSG00000004100	peter pan homolog [Source:MGI Symbol;Acc:MGI:2178445]	Ppan	40.3105	35.7546	45.7253	51.1961	46.0963	47.984		0.3117	0.0106476	0.000771918
	ENSMUSG00000041638	GCN1 activator of EIF2AK4 [Source:MGI Symbol;Acc:MGI:2444248]	Gcn1	24.3887	22.3696	22.2411	28.2638	27.1723	26.387		0.226468	0.0106622	0.000774368
	ENSMUSG00000081137	cDNA sequence BC022960 [Source:MGI Symbol;Acc:MGI:2670977]	BC022960	0.384967	0.418223	0.279736	0.245126	0	0.0603166		-2.24067	0.0106847	0.00078441
	ENSMUSG00000002699	lymphocyte cytosolic protein 2 [Source:MGI Symbol;Acc:MGI:1321402]	Lcp2	307.989	294.471	267.217	241.833	263.098	254.328		-0.196791	0.0106847	0.000783694
	ENSMUSG00000043131	MOB kinase activator 1A [Source:MGI Symbol;Acc:MGI:2442631]	Mob1a	344.499	334.221	322.722	297.623	306.155	292.32		-0.167394	0.0106847	0.0007826
	ENSMUSG00000037221	motile sperm domain containing 3 [Source:MGI Symbol;Acc:MGI:1916179]	Mospd3	49.5192	49.119	49.0328	53.7077	53.6765	60.72		0.269382	0.0106847	0.000783377
	ENSMUSG00000051790	neuroligin 2 [Source:MGI Symbol;Acc:MGI:2681835]	Nlgn2	2.85847	2.49307	3.31752	7.94057	5.86379	4.46603		0.870465	0.0106847	0.000779923
	ENSMUSG00000062279	predicted gene 10237 [Source:MGI Symbol;Acc:MGI:3641816]	Gm10237	1.38634	1.80732	3.02215	6.28955	3.44889	6.51634		1.64725	0.0106847	0.000777758
	ENSMUSG00000030167	killer cell lectin-like receptor subfamily C, member 1 [Source:MGI Symbol;Acc:MGI:1336161]	Klrc1	14.2631	21.4255	12.5395	6.89555	12.372	9.10449		-0.779883	0.010727	0.000794232
	ENSMUSG00000028292	arginyl-tRNA synthetase 2, mitochondrial [Source:MGI Symbol;Acc:MGI:1923596]	Rars2	37.949	37.6387	33.0541	32.3522	32.6575	29.5119		-0.261531	0.010727	0.000792314
	ENSMUSG00000021171	extended synaptotagmin-like protein 2 [Source:MGI Symbol;Acc:MGI:1261845]	Esyt2	89.4633	92.7195	72.3459	74.0978	80.6558	72.2247		-0.22961	0.010727	0.000795955
	ENSMUSG00000018678	Sp2 transcription factor [Source:MGI Symbol;Acc:MGI:1926162]	Sp2	66.174	62.5225	67.012	71.4138	71.5897	76.5745		0.232303	0.010727	0.000793106
	ENSMUSG00000017861	myeloblastosis oncogene-like 2 [Source:MGI Symbol;Acc:MGI:101785]	Mybl2	37.7365	37.2654	37.7722	40.509	44.0087	44.3618		0.243555	0.010727	0.000794782
	ENSMUSG00000057863	ribosomal protein L36 [Source:MGI Symbol;Acc:MGI:1860603]	Rpl36	1934.39	1872.12	3242.26	3009.48	3067.19	2946.67		0.550935	0.010727	0.000795888
	ENSMUSG00000027550	leucine rich repeat and coiled-coil domain containing 1 [Source:MGI Symbol;Acc:MGI:1918960]	Lrrcc1	18.7882	19.0099	16.5459	16.7843	16.3483	15.1141		-0.229878	0.0107714	0.000803947
	ENSMUSG00000003746	mannosidase 1, alpha [Source:MGI Symbol;Acc:MGI:104677]	Man1a	37.1798	40.0821	32.1674	33.0668	31.2648	31.5022		-0.220823	0.0107714	0.00080631
	ENSMUSG00000054874	pecanex homolog 3 [Source:MGI Symbol;Acc:MGI:1861733]	Pcnx3	39.2165	35.5743	37.1529	44.6198	39.8438	43.3298		0.218971	0.0107714	0.000804036
	ENSMUSG00000030602	p21 (RAC1) activated kinase 4 [Source:MGI Symbol;Acc:MGI:1917834]	Pak4	10.2452	10.1783	10.8869	12.3969	11.2947	14.0908		0.39036	0.0107714	0.000801252
	ENSMUSG00000067870	ribosomal protein L31, pseudogene 8 [Source:MGI Symbol;Acc:MGI:3647726]	Rpl31-ps8	100.433	136.151	131.363	166.839	127.922	205.048		0.669526	0.0107714	0.000805068
	ENSMUSG00000033436	armadillo repeat containing, X-linked 2 [Source:MGI Symbol;Acc:MGI:1914666]	Armcx2	1.43895	2.27789	1.52361	3.92677	2.55699	2.89871		0.795695	0.0107828	0.000808572
	ENSMUSG00000029658	WD40 repeat domain 95 [Source:MGI Symbol;Acc:MGI:1923042]	Wdr95	10.7175	10.4354	11.4482	4.60641	7.21105	7.58797		-0.581478	0.0108183	0.000813303
	ENSMUSG00000022194	poly(A) binding protein, nuclear 1 [Source:MGI Symbol;Acc:MGI:1859158]	Pabpn1	13.0074	12.1552	11.9779	19.2767	13.0513	17.0614		0.422916	0.0108183	0.000814075
	ENSMUSG00000072620	schlafen 2 [Source:MGI Symbol;Acc:MGI:1313258]	Slfn2	822.026	841.916	791.972	693.623	732.181	672.44		-0.24686	0.0108276	0.000817324
	ENSMUSG00000001383	zinc finger, matrin type 2 [Source:MGI Symbol;Acc:MGI:1913742]	Zmat2	153.383	159.898	148.477	123.927	142.618	131.944		-0.203884	0.0108276	0.000819032
	ENSMUSG00000069273	H3 clustered histone 6 [Source:MGI Symbol;Acc:MGI:2448326]	H3c6	0.696486	0.54479	1.09318	1.99568	1.38616	5.89277		2.43953	0.0108276	0.000818363
	ENSMUSG00000090963	predicted gene, 17655 [Source:MGI Symbol;Acc:MGI:4937289]	Gm17655	12.9829	14.7883	11.9497	9.0183	11.0924	9.06124		-0.494311	0.0109188	0.000827365
	ENSMUSG00000051457	sialophorin [Source:MGI Symbol;Acc:MGI:98384]	Spn	535.343	494.363	426.655	394.743	469.598	412.383		-0.233163	0.0109239	0.000829179
	ENSMUSG00000067220	cyclic nucleotide gated channel alpha 1 [Source:MGI Symbol;Acc:MGI:88436]	Cnga1	1.49086	0.983785	1.2037	0.685602	0.715973	0.640202		-0.88087	0.0109244	0.00083065
	ENSMUSG00000020918	K(lysine) acetyltransferase 2A [Source:MGI Symbol;Acc:MGI:1343101]	Kat2a	99.3193	95.7568	95.008	106.048	107.316	108.782		0.17663	0.0109426	0.000833468
	ENSMUSG00000026068	interleukin 18 receptor accessory protein [Source:MGI Symbol;Acc:MGI:1338888]	Il18rap	126.559	123.44	118.824	93.4843	120.67	100.022		-0.254442	0.0109809	0.000837828
	ENSMUSG00000020015	cyclin-dependent kinase 17 [Source:MGI Symbol;Acc:MGI:97517]	Cdk17	101.91	99.4186	84.7866	91.2481	82.0927	84.3754		-0.187518	0.0110254	0.000842667
	ENSMUSG00000090812	sterile alpha motif domain containing 15 [Source:MGI Symbol;Acc:MGI:2685109]	Samd15	0.466183	0.425422	0.243901	0.0890518	0.168692	0.0876498		-1.81277	0.0110434	0.000846418
	ENSMUSG00000028252	cyclin C [Source:MGI Symbol;Acc:MGI:1858199]	Ccnc	33.1258	31.4018	27.7534	26.0723	27.3925	26.1754		-0.236295	0.0110434	0.000846936
	ENSMUSG00000078348	splicing factor 3b, subunit 5 [Source:MGI Symbol;Acc:MGI:1913375]	Sf3b5	39.0196	34.5842	53.1382	48.4748	58.1183	55.2361		0.506073	0.0110681	0.000850281
	ENSMUSG00000037447	AT rich interactive domain 5A (MRF1-like) [Source:MGI Symbol;Acc:MGI:2443039]	Arid5a	51.7257	58.4257	51.7762	76.8557	54.5894	65.6324		0.277061	0.0110828	0.000852866
	ENSMUSG00000030539	sema domain, immunoglobulin domain (Ig), transmembrane domain (TM) and short cytoplasmic domain, (semaphorin) 4B [Source:MGI Symbol;Acc:MGI:107559]	Sema4b	5.52866	5.37874	4.65898	7.82225	5.72929	7.31123		0.431163	0.0110974	0.000855444
	ENSMUSG00000039997	interferon activated gene 203 [Source:MGI Symbol;Acc:MGI:96428]	Ifi203	140.973	130.24	107.435	100.743	101.766	101.475		-0.346155	0.0111631	0.000862294
	ENSMUSG00000003970	ribosomal protein L8 [Source:MGI Symbol;Acc:MGI:1350927]	Rpl8	3500.35	3523.47	3911.21	4440.84	4138.57	4083.18		0.235777	0.0111631	0.000863436
	ENSMUSG00000042284	integrin alpha 1 [Source:MGI Symbol;Acc:MGI:96599]	Itga1	4.27016	3.82006	2.94276	0.364792	2.40727	1.58335		-1.41984	0.0111927	0.000869599
	ENSMUSG00000008855	histone deacetylase 5 [Source:MGI Symbol;Acc:MGI:1333784]	Hdac5	15.2662	15.2852	16.7583	25.4248	18.2259	20.7852		0.448317	0.0111927	0.00086743
	ENSMUSG00000031788	kinesin family member C3 [Source:MGI Symbol;Acc:MGI:109202]	Kifc3	4.52798	4.7281	5.19413	8.35558	5.96534	6.65361		0.533081	0.0111927	0.000870127
	ENSMUSG00000014907	nuclear assembly factor 1 ribonucleoprotein [Source:MGI Symbol;Acc:MGI:2682306]	Naf1	24.239	26.8399	27.9296	38.3574	28.1927	31.5615		0.321028	0.0112964	0.000879669
	ENSMUSG00000007836	heterogeneous nuclear ribonucleoprotein A0 [Source:MGI Symbol;Acc:MGI:1924384]	Hnrnpa0	258.126	209.525	267.018	276.403	296.965	305.123		0.355358	0.0113937	0.000888738
	ENSMUSG00000050382	kinesin family member 7 [Source:MGI Symbol;Acc:MGI:1098239]	Kif7	3.38096	3.51285	3.45796	6.45842	4.13941	4.70781		0.496617	0.0114002	0.000890741
	ENSMUSG00000027630	transducin (beta)-like 1X-linked receptor 1 [Source:MGI Symbol;Acc:MGI:2441730]	Tbl1xr1	124	106.917	101.476	91.3742	103.975	92.2965		-0.243907	0.0114512	0.000897732
	ENSMUSG00000041697	cytochrome c oxidase subunit 6A1 [Source:MGI Symbol;Acc:MGI:103099]	Cox6a1	611.791	589.959	714.136	677.97	749.141	739.499		0.270337	0.0114512	0.000896985
	ENSMUSG00000020949	FK506 binding protein 3 [Source:MGI Symbol;Acc:MGI:1353460]	Fkbp3	72.1504	72.2421	74.6089	60.0837	69.4311	60.9509		-0.199403	0.0115128	0.00090434
	ENSMUSG00000058443	ribosomal protein L10, pseudogene 3 [Source:MGI Symbol;Acc:MGI:3704336]	Rpl10-ps3	18.6506	20.3606	17.9818	30.5581	21.6731	33.9257		0.713405	0.0115128	0.000905579
	ENSMUSG00000041187	protein kinase D2 [Source:MGI Symbol;Acc:MGI:2141917]	Prkd2	98.4002	96.6914	95.7945	126.882	92.7713	117.017		0.246247	0.0115423	0.000910109
	ENSMUSG00000031156	solute carrier family 35 (UDP-galactose transporter), member A2 [Source:MGI Symbol;Acc:MGI:1345297]	Slc35a2	10.4165	12.3917	9.1903	15.4291	12.542	13.7509		0.358776	0.0115423	0.000910926
	ENSMUSG00000044037	ALS2 C-terminal like [Source:MGI Symbol;Acc:MGI:2447532]	Als2cl	46.8146	54.2952	35.6777	31.0063	31.7494	37.1242		-0.406478	0.0115432	0.000916449
	ENSMUSG00000016481	complement component (3b/4b) receptor 1-like [Source:MGI Symbol;Acc:MGI:88513]	Cr1l	36.5257	38.3461	38.0018	29.2332	33.5415	31.1848		-0.23637	0.0115432	0.000920321
	ENSMUSG00000025821	zinc finger protein 282 [Source:MGI Symbol;Acc:MGI:2141413]	Zfp282	16.3213	14.5416	15.2787	17.8675	17.8444	18.1148		0.244205	0.0115432	0.000917534
	ENSMUSG00000033751	growth arrest and DNA-damage-inducible, gamma interacting protein 1 [Source:MGI Symbol;Acc:MGI:1914947]	Gadd45gip1	36.0937	32.5057	43.9319	46.6042	48.1965	45.3876		0.380878	0.0115432	0.000920708
	ENSMUSG00000040860	ciliary rootlet coiled-coil, rootletin [Source:MGI Symbol;Acc:MGI:3529431]	Crocc	4.05738	3.32428	3.94334	5.54379	4.74104	4.95324		0.429217	0.0115432	0.000921589
	ENSMUSG00000020988	L-2-hydroxyglutarate dehydrogenase [Source:MGI Symbol;Acc:MGI:2384968]	L2hgdh	6.75331	7.09579	8.73057	10.0443	9.02722	9.82302		0.45476	0.0115432	0.000914169
	ENSMUSG00000002985	apolipoprotein E [Source:MGI Symbol;Acc:MGI:88057]	Apoe	5.88254	4.82854	5.79438	10.9249	6.60272	9.01194		0.697385	0.0115432	0.000914738
	ENSMUSG00000039953	calsyntenin 1 [Source:MGI Symbol;Acc:MGI:1929895]	Clstn1	24.6044	24.7163	22.7396	38.125	27.0036	29.3764		0.320027	0.0115704	0.000926796
	ENSMUSG00000060019	predicted pseudogene 10073 [Source:MGI Symbol;Acc:MGI:3641908]	Gm10073	32.3479	48.3854	50.4752	63.4182	48.3615	75.8639		0.782333	0.0115704	0.00092625
	ENSMUSG00000105096	guanylate-binding protein 10 [Source:MGI Symbol;Acc:MGI:4359647]	Gbp10	6.73518	7.68286	4.98151	2.92926	4.89611	4.01378		-0.725914	0.0116498	0.000935559
	ENSMUSG00000057137	transmembrane protein 140 [Source:MGI Symbol;Acc:MGI:1915737]	Tmem140	7.12284	7.91108	6.34977	4.56077	5.34569	5.40546		-0.43673	0.0116498	0.000936205
	ENSMUSG00000032485	SREBF chaperone [Source:MGI Symbol;Acc:MGI:2135958]	Scap	54.5886	49.1976	49.3191	59.2965	58.9088	57.9364		0.199437	0.0116654	0.000940522
	ENSMUSG00000023973	canopy FGF signaling regulator 3 [Source:MGI Symbol;Acc:MGI:1919279]	Cnpy3	35.5182	33.5717	36.2412	40.5332	39.5401	41.0066		0.243145	0.0116654	0.00093962
	ENSMUSG00000017561	cytokine receptor-like factor 3 [Source:MGI Symbol;Acc:MGI:1860086]	Crlf3	191.282	196.03	161.741	176.536	150.172	161.167		-0.20355	0.0116707	0.000942479
	ENSMUSG00000027006	DnaJ heat shock protein family (Hsp40) member C10 [Source:MGI Symbol;Acc:MGI:1914111]	Dnajc10	47.6608	51.2421	42.3507	43.5434	41.8108	38.8105		-0.248575	0.0117118	0.000947329
	ENSMUSG00000062743	zinc finger protein 677 [Source:MGI Symbol;Acc:MGI:3053207]	Zfp677	13.5735	14.2082	12.0795	9.26563	10.7623	10.6585		-0.345409	0.0117262	0.000951567
	ENSMUSG00000032094	CD3 antigen, delta polypeptide [Source:MGI Symbol;Acc:MGI:88331]	Cd3d	800.282	858.611	897.729	712.58	765.47	683.568		-0.236347	0.0117262	0.000950937
	ENSMUSG00000038151	PR domain containing 1, with ZNF domain [Source:MGI Symbol;Acc:MGI:99655]	Prdm1	7.51441	6.99344	5.29653	4.40597	6.36355	4.55245		-0.499424	0.0117413	0.00095708
	ENSMUSG00000029992	glutamine fructose-6-phosphate transaminase 1 [Source:MGI Symbol;Acc:MGI:95698]	Gfpt1	26.3614	24.8101	23.8133	18.4971	22.1427	20.5863		-0.278365	0.0117413	0.000955342
	ENSMUSG00000035725	protein kinase, X-linked [Source:MGI Symbol;Acc:MGI:1309999]	Prkx	49.1519	48.496	44.0835	37.8861	41.3264	39.7404		-0.251012	0.0117413	0.000957412
	ENSMUSG00000043008	kelch-like 6 [Source:MGI Symbol;Acc:MGI:2686922]	Klhl6	351.679	347.562	297.821	309.42	299.489	292.254		-0.185004	0.0118581	0.000968492
	ENSMUSG00000056498	transmembrane protein 154 [Source:MGI Symbol;Acc:MGI:2444725]	Tmem154	51.8605	51.6837	48.3289	30.6587	46.3371	38.3554		-0.388644	0.0118663	0.000972069
	ENSMUSG00000030374	striatin, calmodulin binding protein 4 [Source:MGI Symbol;Acc:MGI:2142346]	Strn4	30.4814	32.5454	30.943	36.8842	32.6581	36.3998		0.213302	0.0118663	0.000972275
	ENSMUSG00000013236	protein tyrosine phosphatase, receptor type, S [Source:MGI Symbol;Acc:MGI:97815]	Ptprs	12.1191	10.3404	11.3331	20.2863	13.8028	15.0884		0.473117	0.0118775	0.000974747
	ENSMUSG00000032637	ataxin 2-like [Source:MGI Symbol;Acc:MGI:2446242]	Atxn2l	179.184	171.657	163.104	207.775	172.275	201.047		0.202733	0.0118837	0.000976816
	ENSMUSG00000108435	predicted gene 45051 [Source:MGI Symbol;Acc:MGI:5753627]	Gm45051	1.45112	1.26118	2.31981	3.69597	2.62549	3.29674		1.09324	0.0119251	0.000981781
	ENSMUSG00000004929	thimet oligopeptidase 1 [Source:MGI Symbol;Acc:MGI:1354165]	Thop1	14.64	15.6046	17.3021	16.5992	20.449	19.6487		0.350959	0.0119486	0.000985283
	ENSMUSG00000020182	dopa decarboxylase [Source:MGI Symbol;Acc:MGI:94876]	Ddc	6.2912	5.64924	4.12004	2.21903	3.61314	3.65651		-0.693322	0.011957	0.000988443
	ENSMUSG00000058603	ribosomal protein L28, pseudogene 1 [Source:MGI Symbol;Acc:MGI:3705349]	Rpl28-ps1	70.3216	80.3079	77.2619	117.942	83.4641	126.927		0.661185	0.011957	0.000989109
	ENSMUSG00000043190	Rieske (Fe-S) domain containing [Source:MGI Symbol;Acc:MGI:2145198]	Rfesd	9.40242	11.1581	10.5684	6.68309	9.52314	6.95962		-0.45902	0.0120565	0.000998918
	ENSMUSG00000024082	NADH:ubiquinone oxidoreductase complex assembly factor 7 [Source:MGI Symbol;Acc:MGI:1920944]	Ndufaf7	26.063	27.1733	25.4223	20.1622	24.6002	20.7511		-0.286076	0.0120869	0.00100778
	ENSMUSG00000020152	ARP2 actin-related protein 2 [Source:MGI Symbol;Acc:MGI:1913963]	Actr2	639.571	604.05	582.103	471.491	562.227	526.42		-0.207382	0.0120869	0.00100458
	ENSMUSG00000030220	Rho, GDP dissociation inhibitor (GDI) beta [Source:MGI Symbol;Acc:MGI:101940]	Arhgdib	2939.62	2948.69	2894.87	2375.81	2680.97	2546.58		-0.182867	0.0120869	0.00100568
	ENSMUSG00000004383	LARGE xylosyl- and glucuronyltransferase 1 [Source:MGI Symbol;Acc:MGI:1342270]	Large1	0.671617	0.628121	0.929379	1.72919	1.1359	1.15294		0.818163	0.0120869	0.00100655
	ENSMUSG00000078238	predicted gene 12854 [Source:MGI Symbol;Acc:MGI:3650410]	Gm12854	4.70515	4.08929	4.7866	2.62148	1.41883	1.4744		-1.39269	0.0121046	0.00101085
	ENSMUSG00000037649	histocompatibility 2, class II, locus DMa [Source:MGI Symbol;Acc:MGI:95921]	H2-DMa	36.5772	38.9664	31.9534	52.4516	37.5501	47.149		0.348193	0.0121087	0.00101277
	ENSMUSG00000024293	establishment of sister chromatid cohesion N-acetyltransferase 1 [Source:MGI Symbol;Acc:MGI:1925055]	Esco1	51.3305	52.0933	47.5267	48.2414	44.3907	43.4034		-0.185805	0.0121116	0.0010146
	ENSMUSG00000113769	RIKEN cDNA 5033406O09 gene [Source:MGI Symbol;Acc:MGI:1923205]	5033406O09Rik	0.321514	0.670634	0.168212	0.122833	0.116342	0		-3.09004	0.0122178	0.0010251
	ENSMUSG00000036606	plexin B2 [Source:MGI Symbol;Acc:MGI:2154239]	Plxnb2	0.0905072	0.0786605	0.170994	0.316964	0.191045	0.311974		1.5229	0.0122286	0.00102761
	ENSMUSG00000083992	predicted gene 11478 [Source:MGI Symbol;Acc:MGI:3650888]	Gm11478	85.5411	90.7341	114.089	139.079	90.3987	147.489		0.572648	0.0122884	0.00103425
	ENSMUSG00000026811	ST6 (alpha-N-acetyl-neuraminyl-2,3-beta-galactosyl-1,3)-N-acetylgalactosaminide alpha-2,6-sialyltransferase 6 [Source:MGI Symbol;Acc:MGI:1355316]	St6galnac6	2.49109	2.83766	3.07901	4.11177	3.43502	3.97883		0.543216	0.0122984	0.0010367
	ENSMUSG00000049502	deltex 3-like, E3 ubiquitin ligase [Source:MGI Symbol;Acc:MGI:2656973]	Dtx3l	142.489	137.469	110.218	118.822	116.941	112.056		-0.225776	0.012299	0.00103997
	ENSMUSG00000026944	ATP-binding cassette, sub-family A (ABC1), member 2 [Source:MGI Symbol;Acc:MGI:99606]	Abca2	96.0671	91.2781	87.3455	105.695	98.8978	103.703		0.175856	0.012299	0.00103871
	ENSMUSG00000066682	paired immunoglobin-like type 2 receptor beta 2 [Source:MGI Symbol;Acc:MGI:2450535]	Pilrb2	0.357034	0.543027	0.518877	0.11367	0.161494	0.11188		-1.67213	0.0123355	0.00104468
	ENSMUSG00000057672	protein kinase N1 [Source:MGI Symbol;Acc:MGI:108022]	Pkn1	118.636	110.843	109.151	130.375	116.556	133.212		0.211853	0.0123785	0.00105031
	ENSMUSG00000019578	UBX domain protein 6 [Source:MGI Symbol;Acc:MGI:1913780]	Ubxn6	19.1117	21.5505	22.7202	27.6646	22.9227	24.9375		0.29728	0.0123785	0.00105156
	ENSMUSG00000028173	wntless WNT ligand secretion mediator [Source:MGI Symbol;Acc:MGI:1915401]	Wls	5.66898	5.40469	5.42832	9.80436	5.76346	7.23439		0.406806	0.0123848	0.00105697
	ENSMUSG00000053310	neurogranin [Source:MGI Symbol;Acc:MGI:1927184]	Nrgn	4.00731	2.40313	3.35452	7.27216	5.7278	6.0275		0.933182	0.0123848	0.00105668
	ENSMUSG00000041075	frizzled class receptor 7 [Source:MGI Symbol;Acc:MGI:108570]	Fzd7	0.231261	0.133994	0.179248	0.441761	0.371926	0.458962		1.23357	0.0123848	0.00105456
	ENSMUSG00000061286	exosome component 5 [Source:MGI Symbol;Acc:MGI:107889]	Exosc5	21.8488	21.2657	26.7145	25.9432	26.3874	28.2769		0.328568	0.012437	0.00106306
	ENSMUSG00000019796	low density lipoprotein receptor-related protein 11 [Source:MGI Symbol;Acc:MGI:2442989]	Lrp11	3.81588	4.26396	3.4462	2.08263	2.95887	2.56231		-0.585567	0.0126814	0.00109047
	ENSMUSG00000025058	TLR adaptor interacting with endolysosomal SLC15A4 [Source:MGI Symbol;Acc:MGI:1918648]	Tasl	20.5979	20.3822	17.2847	15.2884	15.0136	14.931		-0.388687	0.0126814	0.00108886
	ENSMUSG00000030104	ER degradation enhancer, mannosidase alpha-like 1 [Source:MGI Symbol;Acc:MGI:2180139]	Edem1	182.52	183.669	152.781	143.733	151.875	151.819		-0.218233	0.0126814	0.0010906
	ENSMUSG00000025509	patatin-like phospholipase domain containing 2 [Source:MGI Symbol;Acc:MGI:1914103]	Pnpla2	68.0592	67.261	69.2316	81.6883	72.3831	78.6259		0.219362	0.0126814	0.00108977
	ENSMUSG00000062202	BTB (POZ) domain containing 9 [Source:MGI Symbol;Acc:MGI:1916625]	Btbd9	3.4422	3.70341	3.15216	4.81544	3.98216	4.12011		0.283162	0.0126956	0.00109348
	ENSMUSG00000074358	coiled-coil domain containing 61 [Source:MGI Symbol;Acc:MGI:2685005]	Ccdc61	13.9556	14.2552	14.4321	18.4496	16.6278	18.3191		0.370978	0.0127513	0.00109995
	ENSMUSG00000097006	RIKEN cDNA 9530082P21 gene [Source:MGI Symbol;Acc:MGI:3603340]	9530082P21Rik	1.22658	1.16009	1.13246	0.505363	0.870285	0.633062		-0.835804	0.0128012	0.00110593
	ENSMUSG00000024691	family with sequence similarity 111, member A [Source:MGI Symbol;Acc:MGI:1915508]	Fam111a	192.337	189.98	168.896	153.262	174.048	158.44		-0.204447	0.0128056	0.00110799
	ENSMUSG00000027447	cystatin C [Source:MGI Symbol;Acc:MGI:102519]	Cst3	103.023	97.3726	119.912	125.458	134.639	126.769		0.32904	0.0128632	0.00111466
	ENSMUSG00000028906	erythrocyte membrane protein band 4.1 [Source:MGI Symbol;Acc:MGI:95401]	Epb41	45.6543	47.1862	38.8429	39.8243	40.6515	38.1551		-0.197405	0.0128914	0.0011188
	ENSMUSG00000038894	insulin receptor substrate 2 [Source:MGI Symbol;Acc:MGI:109334]	Irs2	4.7885	6.36263	6.03837	12.7532	5.88136	8.37983		0.609545	0.0129705	0.00112736
	ENSMUSG00000067599	killer cell lectin-like receptor, subfamily A, member 7 [Source:MGI Symbol;Acc:MGI:101901]	Klra7	27.249	40.924	33.5537	10.639	25.8998	19.9045		-0.742654	0.0130647	0.00114158
	ENSMUSG00000060675	phospholipase A and acyltransferase 3 [Source:MGI Symbol;Acc:MGI:2179715]	Plaat3	40.9842	42.4635	40.1827	31.267	37.5372	34.3349		-0.243606	0.0130647	0.00113882
	ENSMUSG00000030830	integrin alpha L [Source:MGI Symbol;Acc:MGI:96606]	Itgal	517.876	499.702	434.125	363.443	473.416	417.3		-0.223555	0.0130647	0.00114176
	ENSMUSG00000022092	protein phosphatase 3, catalytic subunit, gamma isoform [Source:MGI Symbol;Acc:MGI:107162]	Ppp3cc	257.132	260.654	230.439	237.952	231.342	215.098		-0.182948	0.0130647	0.0011424
	ENSMUSG00000021728	embigin [Source:MGI Symbol;Acc:MGI:95321]	Emb	182.689	182.679	168.99	148.865	161.805	159.789		-0.163452	0.0130716	0.00114471
	ENSMUSG00000025246	transducin (beta)-like 1 X-linked [Source:MGI Symbol;Acc:MGI:1336172]	Tbl1x	70.1655	71.9463	68.5121	88.4664	78.9064	76.5173		0.171964	0.0130768	0.00114689
	ENSMUSG00000021504	xylosylprotein beta1,4-galactosyltransferase, polypeptide 7 (galactosyltransferase I) [Source:MGI Symbol;Acc:MGI:2384987]	B4galt7	79.0558	76.1695	74.8608	96.7848	79.7385	92.3503		0.251926	0.0131757	0.00115844
	ENSMUSG00000061207	serine/threonine kinase 19 [Source:MGI Symbol;Acc:MGI:1860085]	Stk19	25.3206	26.3691	27.808	28.0268	29.1835	32.1657		0.273173	0.0131757	0.00115902
	ENSMUSG00000034994	eukaryotic translation elongation factor 2 [Source:MGI Symbol;Acc:MGI:95288]	Eef2	5135.68	4974.22	4794.97	6207.73	5308.25	5514.24		0.171559	0.0131811	0.00116121
	ENSMUSG00000026737	phosphatidylinositol-5-phosphate 4-kinase, type II, alpha [Source:MGI Symbol;Acc:MGI:1298206]	Pip4k2a	146.73	153.561	122.104	129.363	120.83	124.745		-0.199206	0.0132199	0.00116637
	ENSMUSG00000010025	aldehyde dehydrogenase family 3, subfamily A2 [Source:MGI Symbol;Acc:MGI:1353452]	Aldh3a2	36.8072	38.771	31.4445	32.5027	30.8788	30.8025		-0.217165	0.0132821	0.00117625
	ENSMUSG00000020537	developmentally regulated GTP binding protein 2 [Source:MGI Symbol;Acc:MGI:1342307]	Drg2	69.074	67.7465	69.5032	72.6489	76.5285	79.889		0.213293	0.0132821	0.00117438
	ENSMUSG00000040415	deltex 3, E3 ubiquitin ligase [Source:MGI Symbol;Acc:MGI:2135752]	Dtx3	46.1826	49.4638	44.0999	80.3057	48.578	61.1219		0.392056	0.0132821	0.00117708
	ENSMUSG00000093594	predicted gene 20707 [Source:MGI Symbol;Acc:MGI:5313154]	Gm20707	8.70154	7.78383	9.00014	6.45427	5.56887	5.83052		-0.498005	0.0132829	0.00118064
	ENSMUSG00000027835	programmed cell death 10 [Source:MGI Symbol;Acc:MGI:1928396]	Pdcd10	86.4182	92.9795	101.441	76.6735	82.7299	73.6784		-0.249763	0.0132829	0.00117954
	ENSMUSG00000021773	catechol-O-methyltransferase domain containing 1 [Source:MGI Symbol;Acc:MGI:1916406]	Comtd1	9.05218	7.7444	9.66109	11.8431	10.9613	12.3214		0.493999	0.013322	0.00118586
	ENSMUSG00000040322	solute carrier family 25 (mitochondrial carrier, phosphate carrier), member 24 [Source:MGI Symbol;Acc:MGI:1917160]	Slc25a24	80.2711	81.2393	74.8781	46.1631	72.1561	62.2515		-0.353162	0.0133457	0.00118972
	ENSMUSG00000034987	histamine receptor H2 [Source:MGI Symbol;Acc:MGI:108482]	Hrh2	13.6172	13.8386	12.3701	9.52025	11.4844	10.9751		-0.289342	0.013371	0.0011965
	ENSMUSG00000029478	nuclear receptor co-repressor 2 [Source:MGI Symbol;Acc:MGI:1337080]	Ncor2	37.156	31.7813	38.7301	44.2252	49.7114	42.1409		0.334542	0.013371	0.0011998
	ENSMUSG00000044197	G protein-coupled receptor 146 [Source:MGI Symbol;Acc:MGI:1933113]	Gpr146	12.1155	12.6401	10.5944	22.3566	14.36	15.5194		0.435142	0.013371	0.0012004
	ENSMUSG00000020978	kelch domain containing 2 [Source:MGI Symbol;Acc:MGI:1916804]	Klhdc2	18.1596	20.4914	21.2686	45.7748	23.5958	25.7481		0.505171	0.013371	0.00120073
	ENSMUSG00000021483	cyclin-dependent kinase 20 [Source:MGI Symbol;Acc:MGI:2145349]	Cdk20	0.687543	0.582611	0.554559	1.01786	0.777476	1.16342		0.784119	0.013371	0.00119735
	ENSMUSG00000019428	FK506 binding protein 8 [Source:MGI Symbol;Acc:MGI:1341070]	Fkbp8	177.057	173.067	193.134	195.363	201.601	206.718		0.224412	0.0133731	0.00120267
	ENSMUSG00000003420	Fc fragment of IgG receptor and transporter [Source:MGI Symbol;Acc:MGI:103017]	Fcgrt	12.6868	7.58352	7.43949	3.80982	6.11439	5.62476		-0.79896	0.0133907	0.00120601
	ENSMUSG00000100367	predicted gene 29336 [Source:MGI Symbol;Acc:MGI:5580042]	Gm29336	3.25173	2.64947	4.43038	1.94111	2.57395	0.38211		-2.06878	0.0133918	0.00120787
	ENSMUSG00000032661	2'-5' oligoadenylate synthetase 3 [Source:MGI Symbol;Acc:MGI:2180850]	Oas3	43.2764	39.0866	35.3372	24.1993	35.2898	32.6767		-0.31459	0.0134037	0.00121285
	ENSMUSG00000024413	NPC intracellular cholesterol transporter 1 [Source:MGI Symbol;Acc:MGI:1097712]	Npc1	45.6467	44.2419	32.8042	35.5486	33.6607	35.8498		-0.251983	0.0134037	0.00121295
	ENSMUSG00000074994	glutamine and serine rich 1 [Source:MGI Symbol;Acc:MGI:2138986]	Qser1	15.6225	15.1138	14.9151	22.3637	17.6172	17.4021		0.255082	0.0134037	0.00121422
	ENSMUSG00000015355	CD48 antigen [Source:MGI Symbol;Acc:MGI:88339]	Cd48	647.786	644.16	626.431	561.274	598.596	555.199		-0.168776	0.0134843	0.00122506
	ENSMUSG00000022559	F-box and leucine-rich repeat protein 6 [Source:MGI Symbol;Acc:MGI:1354705]	Fbxl6	51.1425	53.1702	48.2452	64.4289	53.0138	60.5894		0.236912	0.0134843	0.00122329
	ENSMUSG00000021585	calpastatin [Source:MGI Symbol;Acc:MGI:1098236]	Cast	83.3544	80.8576	69.7087	70.4979	68.1042	70.6669		-0.168228	0.0135122	0.00123113
	ENSMUSG00000060419	ribosomal protein S16, pseudogene 2 [Source:MGI Symbol;Acc:MGI:3704259]	Rps16-ps2	172.962	196.223	218.285	268.606	204.724	266.115		0.455924	0.0135122	0.00123085
	ENSMUSG00000031309	ribosomal protein S6 kinase polypeptide 3 [Source:MGI Symbol;Acc:MGI:104557]	Rps6ka3	149.967	139.373	119.091	124.832	128.134	118.472		-0.195055	0.013614	0.00124219
	ENSMUSG00000020277	phosphofructokinase, liver, B-type [Source:MGI Symbol;Acc:MGI:97547]	Pfkl	18.1788	17.7402	19.0614	22.9283	21.6535	21.5177		0.280138	0.013672	0.00124928
	ENSMUSG00000066456	high mobility group nucleosomal binding domain 3 [Source:MGI Symbol;Acc:MGI:2138069]	Hmgn3	0.373844	0.0812279	0.488977	0.952173	0.958221	0.937182		1.88767	0.0136868	0.00125242
	ENSMUSG00000055491	peroxisome proliferative activated receptor, gamma, coactivator-related 1 [Source:MGI Symbol;Acc:MGI:2385096]	Pprc1	61.5064	55.5897	66.495	75.2774	69.9581	67.7857		0.230594	0.0136944	0.00125602
	ENSMUSG00000038319	potassium voltage-gated channel, subfamily H (eag-related), member 2 [Source:MGI Symbol;Acc:MGI:1341722]	Kcnh2	0.624926	0.626687	0.712591	1.1708	0.782771	1.49129		1.02082	0.0136944	0.0012567
	ENSMUSG00000089715	chromobox 6 [Source:MGI Symbol;Acc:MGI:3512628]	Cbx6	21.5584	21.9086	20.751	31.5571	23.1767	26.1381		0.304154	0.013731	0.00126187
	ENSMUSG00000017639	RAB11 family interacting protein 4 (class II) [Source:MGI Symbol;Acc:MGI:2442920]	Rab11fip4	23.3655	20.3751	19.2295	10.7031	16.7403	15.7799		-0.4789	0.0137369	0.00126421
	ENSMUSG00000038400	prostate transmembrane protein, androgen induced 1 [Source:MGI Symbol;Acc:MGI:1929600]	Pmepa1	65.2542	62.7901	62.2121	79.848	58.1097	97.8207		0.474012	0.0137836	0.00127031
	ENSMUSG00000021779	thyroid hormone receptor beta [Source:MGI Symbol;Acc:MGI:98743]	Thrb	1.41574	1.66108	1.19335	1.18693	1.23805	0.69503		-0.799568	0.0138324	0.00127844
	ENSMUSG00000028433	ubiquitin-associated protein 2 [Source:MGI Symbol;Acc:MGI:1916176]	Ubap2	127.972	112.612	117.319	133.554	131.082	140.251		0.223676	0.0138324	0.00127719
	ENSMUSG00000061482	H4 clustered histone 4 [Source:MGI Symbol;Acc:MGI:2448423]	H4c4	3.37692	3.33512	4.81844	7.33034	5.4618	10.1971		1.30466	0.0138514	0.00128201
	ENSMUSG00000063021	H2A clustered histone 15 [Source:MGI Symbol;Acc:MGI:2448297]	H2ac15	2.37054	0.386297	2.8422	3.96224	2.94867	7.79971		2.0883	0.0138948	0.00128784
	ENSMUSG00000000581	C1D nuclear receptor co-repressor [Source:MGI Symbol;Acc:MGI:1927354]	C1d	58.2991	55.9378	62.5533	47.4136	53.1354	47.9003		-0.230235	0.0140116	0.00130051
	ENSMUSG00000029475	lysine (K)-specific demethylase 2B [Source:MGI Symbol;Acc:MGI:1354737]	Kdm2b	14.0463	13.9258	12.9581	18.6962	14.6648	16.5687		0.275363	0.0140269	0.00130377
	ENSMUSG00000033083	TBC1 domain family, member 4 [Source:MGI Symbol;Acc:MGI:2429660]	Tbc1d4	11.0293	12.0249	10.6492	8.37526	9.2502	9.38435		-0.273365	0.0141207	0.00131555
	ENSMUSG00000076475	T cell receptor beta, variable 19 [Source:MGI Symbol;Acc:MGI:98604]	Trbv19	181.263	186.952	175.998	140.899	166.956	149.705		-0.247498	0.0141207	0.00131619
	ENSMUSG00000023132	granzyme A [Source:MGI Symbol;Acc:MGI:109266]	Gzma	1276.81	1370.26	1483.9	301.835	1491.31	655.977		-0.951868	0.0141629	0.00132198
	ENSMUSG00000108090	predicted gene 6637 [Source:MGI Symbol;Acc:MGI:3642957]	Gm6637	11.2794	6.75616	7.70885	0.582334	4.1367	1.7195		-2.20394	0.0141812	0.00132555
	ENSMUSG00000040560	WD repeat domain 7 [Source:MGI Symbol;Acc:MGI:1860197]	Wdr7	15.5796	15.2292	13.3459	12.9043	13.1426	12.9268		-0.194752	0.0141957	0.00132877
	ENSMUSG00000059479	UDP-GlcNAc:betaGal beta-1,3-N-acetylglucosaminyltransferase 8 [Source:MGI Symbol;Acc:MGI:2385269]	B3gnt8	0.0539632	0.0703498	0	0	0	0		-2.53975	0.0142628	0.00133878
	ENSMUSG00000061143	mastermind like transcriptional coactivator 3 [Source:MGI Symbol;Acc:MGI:2389461]	Maml3	1.55477	2.24407	1.60751	7.12795	3.3455	2.88146		0.910791	0.0142628	0.00133772
	ENSMUSG00000026082	REV1, DNA directed polymerase [Source:MGI Symbol;Acc:MGI:1929074]	Rev1	12.2721	12.7989	13.3022	18.3032	13.8175	15.051		0.288275	0.0142871	0.00134294
	ENSMUSG00000025199	conserved helix-loop-helix ubiquitous kinase [Source:MGI Symbol;Acc:MGI:99484]	Chuk	79.5961	77.6831	71.3824	68.1304	67.0773	67.8325		-0.171904	0.0143107	0.00134703
	ENSMUSG00000026728	vimentin [Source:MGI Symbol;Acc:MGI:98932]	Vim	1621.45	1604.12	1531.68	1640.39	1823.88	1791.78		0.173882	0.0143198	0.00134977
	ENSMUSG00000018974	squamous cell carcinoma antigen recognized by T cells 3 [Source:MGI Symbol;Acc:MGI:1858230]	Sart3	49.8582	47.2862	47.4423	55.8586	52.255	54.1277		0.179115	0.0145224	0.00137268
	ENSMUSG00000060639	H4 clustered histone 9 [Source:MGI Symbol;Acc:MGI:2448432]	H4c9	16.8191	13.3647	23.8845	21.419	20.2871	30.418		0.74158	0.0145224	0.00137241
	ENSMUSG00000032398	small nuclear RNA activating complex, polypeptide 5 [Source:MGI Symbol;Acc:MGI:1914282]	Snapc5	108.961	115.345	97.7404	77.4414	83.8151	94.141		-0.258913	0.0145319	0.00137547
	ENSMUSG00000040524	zinc finger protein 609 [Source:MGI Symbol;Acc:MGI:2674092]	Zfp609	14.0566	12.6696	13.0676	24.1473	15.7232	15.9419		0.348778	0.0145955	0.0013834
	ENSMUSG00000053914	lysine (K)-specific demethylase 4D [Source:MGI Symbol;Acc:MGI:3606484]	Kdm4d	1.42462	1.64497	1.27773	0.738654	1.03102	0.68876		-0.947134	0.0146981	0.00140469
	ENSMUSG00000037415	RAN binding protein 10 [Source:MGI Symbol;Acc:MGI:1921584]	Ranbp10	49.8424	51.4386	39.6333	35.8185	38.8651	41.7574		-0.244998	0.0146981	0.00140248
	ENSMUSG00000010406	mitochondrial ribosomal protein L52 [Source:MGI Symbol;Acc:MGI:1916086]	Mrpl52	59.0138	61.3283	87.2603	79.4326	93.2837	85.783		0.452842	0.0146981	0.00140389
	ENSMUSG00000094344	predicted gene 11942 [Source:MGI Symbol;Acc:MGI:3650608]	Gm11942	23.9656	29.0428	20.8975	33.2065	29.3142	45.6937		0.711494	0.0146981	0.00140466
	ENSMUSG00000104699	Rps4x retrotransposed pseudogene [Source:MGI Symbol;Acc:MGI:3644569]	Rps4x-ps	8.07678	11.6781	11.6526	14.0259	11.292	20.4316		0.854553	0.0146981	0.00140166
	ENSMUSG00000064264	zinc finger protein 428 [Source:MGI Symbol;Acc:MGI:1916463]	Zfp428	1.24643	0.812465	2.56189	2.97622	2.49678	3.01306		1.26098	0.0146981	0.0014018
	ENSMUSG00000030555	tetratricopeptide repeat domain 23 [Source:MGI Symbol;Acc:MGI:1914259]	Ttc23	0.549693	0.573292	0.251644	0.249385	0.323229	0.180864		-1.18761	0.0147029	0.00140901
	ENSMUSG00000068856	splicing factor 3b, subunit 4 [Source:MGI Symbol;Acc:MGI:109580]	Sf3b4	90.1134	84.8955	98.5383	102.634	105.348	105.626		0.257831	0.0147029	0.00140738
	ENSMUSG00000075289	carnosine synthase 1 [Source:MGI Symbol;Acc:MGI:2147595]	Carns1	11.9927	13.0175	10.5471	20.4016	12.2227	16.2095		0.415088	0.0147538	0.00141582
	ENSMUSG00000045854	LYR motif containing 2 [Source:MGI Symbol;Acc:MGI:1917573]	Lyrm2	34.8336	37.1547	34.6497	26.5381	30.0334	27.5607		-0.333923	0.0147734	0.00141964
	ENSMUSG00000003868	RuvB-like protein 2 [Source:MGI Symbol;Acc:MGI:1342299]	Ruvbl2	97.2712	93.2756	111.342	112.567	125.096	113.813		0.26339	0.0148084	0.00142507
	ENSMUSG00000060981	H4 clustered histone 8 [Source:MGI Symbol;Acc:MGI:2448427]	H4c8	1.48663	0.969031	2.80867	3.54976	3.13802	8.85113		2.13531	0.0148084	0.00142689
	ENSMUSG00000038507	poly (ADP-ribose) polymerase family, member 12 [Source:MGI Symbol;Acc:MGI:2143990]	Parp12	22.6784	23.8648	20.6647	12.7234	19.8302	17.9215		-0.359772	0.0148444	0.00143286
	ENSMUSG00000038628	polymerase (RNA) III (DNA directed) polypeptide K [Source:MGI Symbol;Acc:MGI:1914255]	Polr3k	84.73	91.9442	87.1447	80.927	80.8657	73.0998		-0.200023	0.0148444	0.00143454
	ENSMUSG00000017466	tissue inhibitor of metalloproteinase 2 [Source:MGI Symbol;Acc:MGI:98753]	Timp2	9.08665	8.84548	9.74783	14.7597	8.92321	12.9256		0.457205	0.0148444	0.00143619
	ENSMUSG00000021675	coagulation factor II (thrombin) receptor-like 2 [Source:MGI Symbol;Acc:MGI:1298208]	F2rl2	31.7429	32.4017	27.5979	8.26858	24.9686	19.0771		-0.773878	0.0149985	0.00145307
	ENSMUSG00000024944	ADP-ribosylation factor-like 2 [Source:MGI Symbol;Acc:MGI:1928393]	Arl2	6.87393	5.6667	6.72848	8.17458	7.80355	8.77444		0.436385	0.0150233	0.00145744
	ENSMUSG00000034194	R3H domain and coiled-coil containing 1 [Source:MGI Symbol;Acc:MGI:1919093]	R3hcc1	28.8395	26.1258	28.0844	30.7218	31.8786	32.8899		0.249877	0.0150789	0.00146481
	ENSMUSG00000020893	period circadian clock 1 [Source:MGI Symbol;Acc:MGI:1098283]	Per1	17.7233	19.169	17.0232	28.0484	18.5589	22.2021		0.311741	0.0151407	0.0014728
	ENSMUSG00000032776	multiple C2 domains, transmembrane 2 [Source:MGI Symbol;Acc:MGI:2685335]	Mctp2	13.1812	14.2707	11.987	10.2391	11.4722	10.8934		-0.273067	0.0151485	0.0014786
	ENSMUSG00000042350	apoptosis resistant E3 ubiquitin protein ligase 1 [Source:MGI Symbol;Acc:MGI:1915747]	Arel1	79.0159	74.6515	55.9468	65.4583	64.6485	57.8889		-0.267316	0.0151485	0.00147794
	ENSMUSG00000040761	spen family transcription repressor [Source:MGI Symbol;Acc:MGI:1891706]	Spen	32.409	28.3501	32.433	38.9989	37.3941	34.4143		0.230042	0.0151485	0.00147952
	ENSMUSG00000063320	RIKEN cDNA 1190007I07 gene [Source:MGI Symbol;Acc:MGI:3698433]	1190007I07Rik	15.9551	19.7854	20.0204	24.531	21.7385	25.9739		0.499552	0.0151715	0.00148375
	ENSMUSG00000044199	sphingosine-1-phosphate receptor 4 [Source:MGI Symbol;Acc:MGI:1333809]	S1pr4	219.239	192.536	206.876	240.678	230.3	235.971		0.215128	0.0152042	0.00149293
	ENSMUSG00000045128	ribosomal protein L18A [Source:MGI Symbol;Acc:MGI:1924058]	Rpl18a	1708.62	1811.74	1793.81	2324.29	1853.49	2012.03		0.218875	0.0152042	0.00149152
	ENSMUSG00000069729	AT rich interactive domain 1B (SWI-like) [Source:MGI Symbol;Acc:MGI:1926129]	Arid1b	27.6713	25.1338	25.0395	33.3501	29.4138	29.7145		0.221227	0.0152042	0.00149233
	ENSMUSG00000050428	F-box protein 46 [Source:MGI Symbol;Acc:MGI:2444918]	Fbxo46	14.3914	13.0101	13.7011	16.5622	15.7937	16.6563		0.283227	0.0152362	0.00149807
	ENSMUSG00000058756	thyroid hormone receptor alpha [Source:MGI Symbol;Acc:MGI:98742]	Thra	7.16786	9.27867	7.08653	13.2102	8.9274	10.8431		0.472358	0.0152643	0.00150283
	ENSMUSG00000026930	G-protein signalling modulator 1 (AGS3-like, C. elegans) [Source:MGI Symbol;Acc:MGI:1915089]	Gpsm1	5.38671	6.402	6.3194	10.8064	6.94752	8.54158		0.546848	0.0152812	0.0015065
	ENSMUSG00000001700	GRAM domain containing 3 [Source:MGI Symbol;Acc:MGI:1914815]	Gramd3	256.466	251.742	215.462	199.674	206.355	211.065		-0.225289	0.015381	0.00151835
	ENSMUSG00000024325	ring finger protein 1 [Source:MGI Symbol;Acc:MGI:1101770]	Ring1	20.6476	19.5211	23.1081	24.9683	23.5839	25.0141		0.285431	0.0154067	0.00152493
	ENSMUSG00000115431	predicted pseudogene 3219 [Source:MGI Symbol;Acc:MGI:3781398]	Gm3219	3.07465	3.50727	2.68103	6.97455	5.21524	8.67125		1.25358	0.0154067	0.00152336
	ENSMUSG00000035621	midnolin [Source:MGI Symbol;Acc:MGI:1890222]	Midn	48.8035	49.4888	48.1197	59.1637	49.5554	57.6985		0.225938	0.0154516	0.0015314
	ENSMUSG00000059920	RIKEN cDNA 4930453N24 gene [Source:MGI Symbol;Acc:MGI:1914859]	4930453N24Rik	55.2895	55.4374	52.3427	48.6379	49.5922	46.8414		-0.185138	0.0154864	0.00153688
	ENSMUSG00000085037	RIKEN cDNA 4933421O10 gene [Source:MGI Symbol;Acc:MGI:1918323]	4933421O10Rik	1.90707	1.46014	1.8477	3.29601	2.1086	2.81726		0.681356	0.0156049	0.00155069
	ENSMUSG00000034832	tet methylcytosine dioxygenase 3 [Source:MGI Symbol;Acc:MGI:2446229]	Tet3	44.1118	41.9662	41.3536	50.6995	45.7864	47.7177		0.180468	0.0156609	0.0015583
	ENSMUSG00000022565	plectin [Source:MGI Symbol;Acc:MGI:1277961]	Plec	96.0333	86.816	92.8266	114.628	123.454	102.772		0.253188	0.0156621	0.00156048
	ENSMUSG00000064341	mitochondrially encoded NADH dehydrogenase 1 [Source:MGI Symbol;Acc:MGI:101787]	mt-Nd1	8268.86	9052.73	9455.49	6656.69	7293.78	7358.47		-0.249277	0.0157835	0.00157464
	ENSMUSG00000027248	protein disulfide isomerase associated 3 [Source:MGI Symbol;Acc:MGI:95834]	Pdia3	776.771	781.418	729.313	576.999	738.577	641.049		-0.22872	0.0158153	0.00158195
	ENSMUSG00000036825	synovial sarcoma, X 2 interacting protein [Source:MGI Symbol;Acc:MGI:2139150]	Ssx2ip	17.1906	17.1334	15.8361	20.3649	17.8088	20.4092		0.256133	0.0158153	0.00158062
	ENSMUSG00000020376	ring finger protein 130 [Source:MGI Symbol;Acc:MGI:1891717]	Rnf130	17.3696	20.8923	18.1184	11.4563	16.2635	13.3768		-0.445754	0.0158535	0.00158836
	ENSMUSG00000013629	carbamoyl-phosphate synthetase 2, aspartate transcarbamylase, and dihydroorotase [Source:MGI Symbol;Acc:MGI:1916969]	Cad	141.015	123.17	133.523	148.061	162.599	151.964		0.235214	0.0158535	0.00158993
	ENSMUSG00000104698	predicted gene 42602 [Source:MGI Symbol;Acc:MGI:5662739]	Gm42602	0.072241	0.094178	0.094489	0.0344993	0	0		-2.38937	0.0158628	0.00159502
	ENSMUSG00000020124	ubiquitin specific peptidase 15 [Source:MGI Symbol;Acc:MGI:101857]	Usp15	30.4759	29.9075	27.3329	25.9788	27.8808	25.3192		-0.181503	0.0158628	0.00159367
	ENSMUSG00000029723	TSC22 domain family, member 4 [Source:MGI Symbol;Acc:MGI:1926079]	Tsc22d4	63.724	58.6718	60.867	74.1357	68.3801	72.2541		0.25324	0.0159382	0.00160679
	ENSMUSG00000081926	predicted gene 15536 [Source:MGI Symbol;Acc:MGI:3782984]	Gm15536	152.206	149.151	176.366	231.232	176.504	271.766		0.692339	0.0159382	0.00160554
	ENSMUSG00000057572	zinc finger and BTB domain containing 8 opposite strand [Source:MGI Symbol;Acc:MGI:1914356]	Zbtb8os	34.7029	34.6813	31.9977	25.6314	31.1596	28.877		-0.226499	0.0159646	0.00161221
	ENSMUSG00000037326	calpain 15 [Source:MGI Symbol;Acc:MGI:1355075]	Capn15	22.1359	21.014	20.6492	25.5883	21.6617	25.2428		0.220368	0.0159646	0.00161364
	ENSMUSG00000046410	potassium inwardly-rectifying channel, subfamily K, member 6 [Source:MGI Symbol;Acc:MGI:1891291]	Kcnk6	12.1194	10.3136	9.56487	5.65373	8.83187	8.04378		-0.467347	0.0159884	0.00161813
	ENSMUSG00000105504	guanylate binding protein 5 [Source:MGI Symbol;Acc:MGI:2429943]	Gbp5	31.302	35.3404	23.5157	23.5288	25.6981	24.1811		-0.34202	0.0161673	0.00164482
	ENSMUSG00000034853	acyl-CoA thioesterase 11 [Source:MGI Symbol;Acc:MGI:1913736]	Acot11	15.518	15.6177	11.5528	10.8544	12.3857	11.6778		-0.319654	0.0161673	0.00165092
	ENSMUSG00000022270	reticulophagy regulator 1 [Source:MGI Symbol;Acc:MGI:1913520]	Retreg1	88.5062	79.3894	72.2234	54.3239	65.1621	67.4503		-0.309247	0.0161673	0.00165367
	ENSMUSG00000032640	chondroitin sulfate synthase 1 [Source:MGI Symbol;Acc:MGI:2681120]	Chsy1	180.005	164.357	150.493	135.037	157.82	138.075		-0.238179	0.0161673	0.00164298
	ENSMUSG00000024269	tubulin polyglutamylase complex subunit 2 [Source:MGI Symbol;Acc:MGI:1913898]	Tpgs2	24.8228	25.2581	23.3967	19.5295	21.393	21.2227		-0.212944	0.0161673	0.00165744
	ENSMUSG00000059070	ribosomal protein L18 [Source:MGI Symbol;Acc:MGI:98003]	Rpl18	572.844	590.287	606.101	713.875	642.198	648.589		0.186695	0.0161673	0.0016559
	ENSMUSG00000030083	ankyrin repeat and BTB (POZ) domain containing 1 [Source:MGI Symbol;Acc:MGI:1933148]	Abtb1	22.6821	22.8565	21.5327	32.9422	23.141	28.0329		0.316982	0.0161673	0.0016537
	ENSMUSG00000002250	peroxisome proliferator activator receptor delta [Source:MGI Symbol;Acc:MGI:101884]	Ppard	7.88852	6.52598	8.00029	8.82227	8.56636	9.5721		0.354044	0.0161673	0.001657
	ENSMUSG00000084416	ribosomal protein L10A, pseudogene 1 [Source:MGI Symbol;Acc:MGI:3705885]	Rpl10a-ps1	96.3315	118.852	127.939	145.58	121.617	154.67		0.453233	0.0161673	0.00164693
	ENSMUSG00000015745	pleckstrin homology domain containing, family O member 1 [Source:MGI Symbol;Acc:MGI:1914470]	Plekho1	9.75799	12.6512	9.02303	16.0284	11.3496	15.2216		0.48046	0.0161673	0.00165204
	ENSMUSG00000057143	tripartite motif-containing 12C [Source:MGI Symbol;Acc:MGI:4821183]	Trim12c	50.7534	51.268	39.5316	40.0888	41.1251	40.7163		-0.243782	0.0162921	0.00167447
	ENSMUSG00000034255	Rho GTPase activating protein 27 [Source:MGI Symbol;Acc:MGI:1916903]	Arhgap27	51.2464	51.094	47.2184	60.8577	48.0676	61.6914		0.246041	0.0162921	0.0016745
	ENSMUSG00000041203	telomerase RNA component interacting RNase [Source:MGI Symbol;Acc:MGI:1922833]	Trir	255.757	254.652	261.516	305.193	285.794	283.517		0.183461	0.0163138	0.00167887
	ENSMUSG00000019256	aryl-hydrocarbon receptor [Source:MGI Symbol;Acc:MGI:105043]	Ahr	9.54219	9.43454	10.4461	10.0704	11.7262	12.7184		0.356915	0.016343	0.00168402
	ENSMUSG00000001288	retinoic acid receptor, gamma [Source:MGI Symbol;Acc:MGI:97858]	Rarg	1.53047	1.67456	1.83499	4.9074	2.57127	2.56922		0.788742	0.0163482	0.0016867
	ENSMUSG00000020782	LLGL2 scribble cell polarity complex component [Source:MGI Symbol;Acc:MGI:1918843]	Llgl2	7.78915	7.99191	7.79819	9.87346	8.06856	10.9384		0.401973	0.0163777	0.00169189
	ENSMUSG00000025287	acyl-CoA thioesterase 9 [Source:MGI Symbol;Acc:MGI:1928939]	Acot9	78.8475	88.8982	81.6642	69.2408	74.2487	67.7654		-0.244633	0.0165065	0.00171311
	ENSMUSG00000084883	coiled-coil domain containing 85C [Source:MGI Symbol;Acc:MGI:3644008]	Ccdc85c	17.7485	18.5174	20.2292	21.6194	21.5457	22.4149		0.287651	0.0165065	0.00171142
	ENSMUSG00000030811	F-box and leucine-rich repeat protein 19 [Source:MGI Symbol;Acc:MGI:3039600]	Fbxl19	6.71743	6.85206	5.65625	9.15861	7.25978	8.24313		0.334958	0.0165065	0.00170744
	ENSMUSG00000024205	ribosomal protein L36, pseudogene 2 [Source:MGI Symbol;Acc:MGI:3650081]	Rpl36-ps2	4.1189	6.34596	11.4278	10.7292	13.5496	12.6723		1.11929	0.0165065	0.00171385
	ENSMUSG00000032777	general transcription factor III C 1 [Source:MGI Symbol;Acc:MGI:107887]	Gtf3c1	35.0094	34.0061	30.8317	40.9993	37.0094	37.0381		0.167046	0.0165114	0.00171869
	ENSMUSG00000041774	YdjC homolog (bacterial) [Source:MGI Symbol;Acc:MGI:1916351]	Ydjc	5.80805	6.10625	7.96888	9.44444	8.17322	8.25854		0.446532	0.0165114	0.00171656
	ENSMUSG00000028545	BEN domain containing 5 [Source:MGI Symbol;Acc:MGI:1914871]	Bend5	3.81721	4.18302	4.10036	8.92976	6.50605	5.92879		0.684257	0.0165358	0.0017234
	ENSMUSG00000016194	hydroxysteroid 11-beta dehydrogenase 1 [Source:MGI Symbol;Acc:MGI:103562]	Hsd11b1	67.3622	68.3185	64.8536	47.5149	53.8511	58.9993		-0.230267	0.016631	0.00173907
	ENSMUSG00000075227	zinc finger, HIT domain containing 2 [Source:MGI Symbol;Acc:MGI:1352481]	Znhit2	28.6359	24.1766	31.1529	31.5183	33.4712	35.8078		0.371167	0.016631	0.00173986
	ENSMUSG00000035863	paralemmin [Source:MGI Symbol;Acc:MGI:1261814]	Palm	3.08893	2.73831	3.03465	4.09106	3.42777	4.51062		0.546393	0.016631	0.00173712
	ENSMUSG00000003848	NIN1/RPN12 binding protein 1 homolog [Source:MGI Symbol;Acc:MGI:1914869]	Nob1	56.389	56.31	61.6373	71.6618	63.1	64.5667		0.210867	0.01668	0.00174756
	ENSMUSG00000038459	abhydrolase domain containing 17C [Source:MGI Symbol;Acc:MGI:1917428]	Abhd17c	14.0319	13.5137	13.2056	17.6039	16.2619	15.5917		0.240573	0.01668	0.00174936
	ENSMUSG00000027852	neuroblastoma ras oncogene [Source:MGI Symbol;Acc:MGI:97376]	Nras	160.687	150.904	146.097	125.371	147.044	132.166		-0.184549	0.0168087	0.00176506
	ENSMUSG00000001120	poly(rC) binding protein 3 [Source:MGI Symbol;Acc:MGI:1890470]	Pcbp3	3.93072	3.10566	2.94281	6.82599	4.31018	5.18819		0.615728	0.0168792	0.00177467
	ENSMUSG00000029599	DEAD box helicase 54 [Source:MGI Symbol;Acc:MGI:1919240]	Ddx54	71.1676	60.2998	75.7273	75.6146	77.67	82.1238		0.282948	0.0168804	0.00177702
	ENSMUSG00000021891	methyltransferase like 6 [Source:MGI Symbol;Acc:MGI:1914261]	Mettl6	17.1554	16.8422	16.7537	15.7972	15.0711	14.2916		-0.194471	0.0169525	0.00178683
	ENSMUSG00000036943	RAB8B, member RAS oncogene family [Source:MGI Symbol;Acc:MGI:2442982]	Rab8b	307.998	294.135	256.017	220.477	247.578	257.507		-0.205972	0.0170165	0.0017958
	ENSMUSG00000021102	glutaredoxin 5 [Source:MGI Symbol;Acc:MGI:1920296]	Glrx5	31.5326	26.6356	37.3138	35.4339	38.826	38.5629		0.349729	0.0170226	0.00179868
	ENSMUSG00000032403	RIKEN cDNA 2300009A05 gene [Source:MGI Symbol;Acc:MGI:1916728]	2300009A05Rik	7.56941	6.37622	6.49883	10.3996	7.32168	10.619		0.537488	0.0171485	0.00181423
	ENSMUSG00000107458	predicted gene, 44040 [Source:MGI Symbol;Acc:MGI:5690432]	Gm44040	1.92307	1.67136	0.931598	0	0.966495	0.200871		-2.39352	0.0171521	0.00182136
	ENSMUSG00000052658	RIKEN cDNA 5830454E08 gene [Source:MGI Symbol;Acc:MGI:1923350]	5830454E08Rik	3.75653	3.87699	3.27562	3.88692	2.40714	1.03		-1.32761	0.0171521	0.00181857
	ENSMUSG00000094796	cDNA sequence BC147527 [Source:MGI Symbol;Acc:MGI:4840510]	BC147527	34.9723	41.88	38.8987	25.0345	34.9398	28.2094		-0.37723	0.0171521	0.00182034
	ENSMUSG00000031168	phenylalkylamine Ca2+ antagonist (emopamil) binding protein [Source:MGI Symbol;Acc:MGI:107822]	Ebp	101.984	100.816	84.84	73.0912	92.0768	80.9922		-0.248393	0.0171553	0.00182619
	ENSMUSG00000024851	phosphatidylinositol transfer protein, membrane-associated 1 [Source:MGI Symbol;Acc:MGI:1197524]	Pitpnm1	72.2569	76.037	65.6643	95.2459	69.6076	88.4673		0.260037	0.0171553	0.00182469
	ENSMUSG00000015133	leucine-rich repeat kinase 1 [Source:MGI Symbol;Acc:MGI:2142227]	Lrrk1	17.1171	17.4689	16.2951	8.64382	15.7301	12.5014		-0.440865	0.0171561	0.00182853
	ENSMUSG00000098102	predicted gene 2467 [Source:MGI Symbol;Acc:MGI:3780634]	Gm2467	1.153	1.05218	0.703772	0.110124	0.521524	0.108391		-2.40682	0.0171669	0.00183194
	ENSMUSG00000073902	GTPase, very large interferon inducible, family member 3 [Source:MGI Symbol;Acc:MGI:3584360]	Gvin3	149.681	136.39	112.182	110.112	122.74	100.603		-0.367372	0.0171801	0.00183785
	ENSMUSG00000030086	coiled-coil-helix-coiled-coil-helix domain containing 6 [Source:MGI Symbol;Acc:MGI:1913348]	Chchd6	6.86098	6.72332	9.15464	8.4002	10.1641	10.4756		0.522294	0.0171801	0.00183672
	ENSMUSG00000071547	5'-nucleotidase domain containing 2 [Source:MGI Symbol;Acc:MGI:1917271]	Nt5dc2	15.9155	12.7683	16.4401	15.5286	20.6886	20.4402		0.442261	0.0173285	0.00185599
	ENSMUSG00000022774	nuclear cap binding protein subunit 2 [Source:MGI Symbol;Acc:MGI:1915342]	Ncbp2	117.918	118.949	110.928	104.808	110.924	98.8358		-0.184237	0.0174055	0.00187109
	ENSMUSG00000035596	membrane bound O-acyltransferase domain containing 7 [Source:MGI Symbol;Acc:MGI:1924832]	Mboat7	15.1937	15.8569	13.1268	17.7796	14.9829	18.7599		0.271523	0.0174055	0.00187012
	ENSMUSG00000038884	shiftless antiviral inhibitor of ribosomal frameshifting [Source:MGI Symbol;Acc:MGI:2441788]	Shfl	18.0285	18.7936	18.2167	28.8399	18.4675	26.3034		0.469986	0.0174055	0.00186722
	ENSMUSG00000060791	glia maturation factor, gamma [Source:MGI Symbol;Acc:MGI:1927135]	Gmfg	207.812	228.288	221.076	174.479	194.652	185.683		-0.208589	0.0174558	0.00187878
	ENSMUSG00000037533	Rap guanine nucleotide exchange factor (GEF) 6 [Source:MGI Symbol;Acc:MGI:2384761]	Rapgef6	152.382	144.084	116.774	129.949	126.576	120.739		-0.197278	0.0174865	0.00189084
	ENSMUSG00000005763	CD247 antigen [Source:MGI Symbol;Acc:MGI:88334]	Cd247	182.316	185.887	164.997	162.675	155.284	159.579		-0.162728	0.0174865	0.00189063
	ENSMUSG00000033307	macrophage migration inhibitory factor (glycosylation-inhibiting factor) [Source:MGI Symbol;Acc:MGI:96982]	Mif	594.924	522.08	701.677	592.706	746.486	760.297		0.366207	0.0174865	0.00188534
	ENSMUSG00000034227	forkhead box J1 [Source:MGI Symbol;Acc:MGI:1347474]	Foxj1	0.26638	0.231513	0.270991	0.763272	0.522121	0.834728		1.51456	0.0174865	0.00189125
	ENSMUSG00000024856	CDK2-associated protein 2 [Source:MGI Symbol;Acc:MGI:1098779]	Cdk2ap2	174.252	170.931	183.537	180.912	187.45	208.577		0.228644	0.0174921	0.00189415
	ENSMUSG00000004096	CWC15 spliceosome-associated protein [Source:MGI Symbol;Acc:MGI:1913320]	Cwc15	327.194	335.23	312.195	292.047	301.492	288.494		-0.149924	0.0175074	0.0018981
	ENSMUSG00000036292	GRAM domain containing 1C [Source:MGI Symbol;Acc:MGI:2443024]	Gramd1c	2.69201	3.17668	2.24619	1.7289	1.91045	1.87621		-0.550119	0.0175127	0.00190556
	ENSMUSG00000024965	fermitin family member 3 [Source:MGI Symbol;Acc:MGI:2147790]	Fermt3	155.934	156.198	167.502	175.704	173.467	182.477		0.213647	0.0175127	0.00190381
	ENSMUSG00000044033	coiled-coil domain containing 141 [Source:MGI Symbol;Acc:MGI:1919735]	Ccdc141	1.38149	1.38638	1.04863	2.41114	1.42058	1.99011		0.561823	0.0175127	0.00190353
	ENSMUSG00000036712	CYLD lysine 63 deubiquitinase [Source:MGI Symbol;Acc:MGI:1921506]	Cyld	64.7082	65.7913	53.364	57.9566	54.1818	54.5893		-0.181738	0.0176039	0.00191938
	ENSMUSG00000063802	HSPA (heat shock 70kDa) binding protein, cytoplasmic cochaperone 1 [Source:MGI Symbol;Acc:MGI:1913495]	Hspbp1	127.101	126.138	137.557	146.557	152.677	147.721		0.231986	0.0176039	0.0019201
	ENSMUSG00000036966	SPRY domain containing 3 [Source:MGI Symbol;Acc:MGI:2446175]	Spryd3	53.5912	51.7114	47.8753	44.5359	48.4809	43.7225		-0.196507	0.0176193	0.00192527
	ENSMUSG00000014444	piezo-type mechanosensitive ion channel component 1 [Source:MGI Symbol;Acc:MGI:3603204]	Piezo1	48.9136	44.0087	43.1831	54.3086	50.3146	52.9797		0.218739	0.0176193	0.00192871
	ENSMUSG00000004846	procollagen-lysine, 2-oxoglutarate 5-dioxygenase 3 [Source:MGI Symbol;Acc:MGI:1347008]	Plod3	5.30852	5.94628	4.47163	7.23619	5.82806	7.29184		0.403305	0.0176193	0.00192806
	ENSMUSG00000059775	ribosomal protein S26, pseudogene 1 [Source:MGI Symbol;Acc:MGI:3704322]	Rps26-ps1	46.4254	60.8612	48.3975	77.7837	57.7185	78.022		0.540758	0.0176692	0.00193649
	ENSMUSG00000018171	vacuole membrane protein 1 [Source:MGI Symbol;Acc:MGI:1923159]	Vmp1	90.1889	88.7618	89.8963	71.2513	82.8981	74.5799		-0.223989	0.0177277	0.00194523
	ENSMUSG00000056268	DENN/MADD domain containing 1B [Source:MGI Symbol;Acc:MGI:2447812]	Dennd1b	20.2628	19.5244	16.6694	16.3446	16.4579	16.1493		-0.233068	0.0178808	0.00196871
	ENSMUSG00000051124	GTPase, IMAP family member 9 [Source:MGI Symbol;Acc:MGI:3511744]	Gimap9	272.834	283.566	268.517	246.905	259.713	231.35		-0.194142	0.0178808	0.00196855
	ENSMUSG00000024220	zinc finger protein 523 [Source:MGI Symbol;Acc:MGI:2687278]	Zfp523	5.2127	4.15384	4.73137	6.29027	5.46338	6.1411		0.375293	0.0178808	0.00196906
	ENSMUSG00000059552	transformation related protein 53 [Source:MGI Symbol;Acc:MGI:98834]	Trp53	181.862	177.674	177.859	200.591	192.153	198.84		0.163249	0.0180242	0.00198721
	ENSMUSG00000034951	component of oligomeric golgi complex 7 [Source:MGI Symbol;Acc:MGI:2685013]	Cog7	6.55641	6.67395	6.0773	8.18366	7.14995	7.91972		0.283088	0.0180382	0.00199113
	ENSMUSG00000091144	PHD finger protein 11C [Source:MGI Symbol;Acc:MGI:3648476]	Phf11c	34.4745	33.9268	31.7344	26.3996	29.177	28.5476		-0.230695	0.0180621	0.00199613
	ENSMUSG00000035049	ribosomal RNA processing 12 homolog [Source:MGI Symbol;Acc:MGI:2147437]	Rrp12	68.6909	63.5943	66.1207	71.9636	75.467	74.5133		0.188979	0.018071	0.00199966
	ENSMUSG00000030189	Y box protein 3 [Source:MGI Symbol;Acc:MGI:2137670]	Ybx3	206.85	210.862	231.058	264.916	260.509	231.944		0.204925	0.018071	0.00200185
	ENSMUSG00000025584	phosphodiesterase 8A [Source:MGI Symbol;Acc:MGI:1277116]	Pde8a	4.89417	4.95416	4.61907	3.49213	3.2555	3.32889		-0.522355	0.0182224	0.00202165
	ENSMUSG00000048376	coagulation factor II (thrombin) receptor [Source:MGI Symbol;Acc:MGI:101802]	F2r	426.818	388.32	345.025	283.666	357.412	336.103		-0.235176	0.0182224	0.0020234
	ENSMUSG00000021910	nischarin [Source:MGI Symbol;Acc:MGI:1928323]	Nisch	33.7234	34.7387	32.7684	48.2304	32.4074	42.3781		0.298546	0.0182484	0.00202868
	ENSMUSG00000040714	kinesin light chain 3 [Source:MGI Symbol;Acc:MGI:1277971]	Klc3	3.91548	3.90004	4.56508	5.12638	4.61668	6.12098		0.524169	0.018275	0.00203404
	ENSMUSG00000072825	centrosomal protein 170B [Source:MGI Symbol;Acc:MGI:2145043]	Cep170b	19.2826	18.9342	19.2886	22.4898	22.4072	21.178		0.192047	0.018292	0.00203833
	ENSMUSG00000041506	ribosomal RNA processing 9, U3 small nucleolar RNA binding protein [Source:MGI Symbol;Acc:MGI:2384313]	Rrp9	49.5112	43.1169	65.1919	61.1685	62.4617	62.0717		0.358078	0.0183103	0.00204277
	ENSMUSG00000076749	T cell receptor gamma, constant 1 [Source:MGI Symbol;Acc:MGI:98625]	Trgc1	41.4642	52.248	42.3101	65.8447	66.1275	60.4243		0.475935	0.0183993	0.00205511
	ENSMUSG00000020303	stanniocalcin 2 [Source:MGI Symbol;Acc:MGI:1316731]	Stc2	9.18119	6.83534	10.2035	15.4104	13.4357	11.7407		0.587764	0.0185471	0.00207404
	ENSMUSG00000052776	2'-5' oligoadenylate synthetase 1A [Source:MGI Symbol;Acc:MGI:2180860]	Oas1a	0.741342	1.36915	1.18513	0.118011	0.22355	0.34846		-1.71425	0.018602	0.00208262
	ENSMUSG00000025810	neuropilin 1 [Source:MGI Symbol;Acc:MGI:106206]	Nrp1	1.77327	1.21017	1.03775	0.886623	1.19506	0.760784		-0.723592	0.0186823	0.00209406
	ENSMUSG00000020453	POZ (BTB) and AT hook containing zinc finger 1 [Source:MGI Symbol;Acc:MGI:1891832]	Patz1	21.1051	21.1368	21.1894	29.7469	22.34	25.4588		0.286312	0.0186863	0.00209696
	ENSMUSG00000019970	serum/glucocorticoid regulated kinase 1 [Source:MGI Symbol;Acc:MGI:1340062]	Sgk1	22.0649	20.0645	18.7431	17.0593	19.1444	15.8083		-0.307294	0.0187611	0.00210781
	ENSMUSG00000010751	tumor necrosis factor receptor superfamily, member 22 [Source:MGI Symbol;Acc:MGI:1930270]	Tnfrsf22	15.4644	16.1283	13.8699	12.8449	13.665	12.1235		-0.284688	0.0188285	0.00211785
	ENSMUSG00000034586	HID1 domain containing [Source:MGI Symbol;Acc:MGI:2445087]	Hid1	39.5609	41.7945	31.3583	30.2331	31.1344	32.5684		-0.259745	0.0188728	0.00213106
	ENSMUSG00000054099	solute carrier family 25, member 40 [Source:MGI Symbol;Acc:MGI:2442486]	Slc25a40	13.8727	12.4913	11.358	9.27102	10.5649	10.9135		-0.257649	0.0188728	0.00213273
	ENSMUSG00000032239	retinitis pigmentosa 9 (human) [Source:MGI Symbol;Acc:MGI:2157166]	Rp9	49.0275	50.5199	47.1597	59.3515	52.5559	54.8599		0.180162	0.0188728	0.0021266
	ENSMUSG00000050621	ribosomal protein S27, retrogene [Source:MGI Symbol;Acc:MGI:3704345]	Rps27rt	50.442	77.1252	71.6783	99.3299	75.49	93.3754		0.557663	0.0188728	0.00213048
	ENSMUSG00000025314	protein tyrosine phosphatase, receptor type, J [Source:MGI Symbol;Acc:MGI:104574]	Ptprj	47.6016	40.1713	37.7022	34.758	39.2028	35.1545		-0.239958	0.0189012	0.00213842
	ENSMUSG00000030741	spinster homolog 1 [Source:MGI Symbol;Acc:MGI:1920908]	Spns1	23.7492	22.6064	20.3527	27.0338	23.3601	27.0216		0.234931	0.0189241	0.00214846
	ENSMUSG00000045826	protein tyrosine phosphatase, receptor type, C polypeptide-associated protein [Source:MGI Symbol;Acc:MGI:97811]	Ptprcap	443.691	382.788	524.929	490.608	550.739	523.929		0.313736	0.0189241	0.00214843
	ENSMUSG00000058833	required for excision 1-B domain containing [Source:MGI Symbol;Acc:MGI:1913712]	Rex1bd	38.988	38.162	53.6144	45.9066	51.9801	56.2394		0.427823	0.0189241	0.00214688
	ENSMUSG00000049313	sortilin-related receptor, LDLR class A repeats-containing [Source:MGI Symbol;Acc:MGI:1202296]	Sorl1	93.2875	86.1057	70.1867	65.079	79.6274	71.1232		-0.247679	0.0189367	0.00216124
	ENSMUSG00000025223	LIM domain binding 1 [Source:MGI Symbol;Acc:MGI:894762]	Ldb1	187.219	188.005	179.411	238.341	183.867	210.678		0.188645	0.0189367	0.0021623
	ENSMUSG00000037570	microspherule protein 1 [Source:MGI Symbol;Acc:MGI:1858420]	Mcrs1	44.4087	40.8333	46.0222	47.999	50.2701	49.3666		0.211774	0.0189367	0.00216163
	ENSMUSG00000059851	lysine methyltransferase 5C [Source:MGI Symbol;Acc:MGI:2385262]	Kmt5c	29.7171	28.3823	24.9736	34.3046	28.5948	35.2694		0.277705	0.0189367	0.00216012
	ENSMUSG00000042737	dolichyl-phosphate mannosyltransferase polypeptide 3 [Source:MGI Symbol;Acc:MGI:1915813]	Dpm3	53.6011	42.4553	68.8379	80.3633	66.8312	71.2359		0.498443	0.0189367	0.00215771
	ENSMUSG00000021458	aminopeptidase O [Source:MGI Symbol;Acc:MGI:1919311]	Aopep	20.6633	20.5126	19.6903	20.2479	17.956	17.089		-0.193541	0.0189956	0.00217152
	ENSMUSG00000074829	RIKEN cDNA 2010315B03 gene [Source:MGI Symbol;Acc:MGI:1919321]	2010315B03Rik	22.1956	20.0532	17.4343	17.9314	16.3378	16.6981		-0.269008	0.0190333	0.00217873
	ENSMUSG00000035885	cytochrome c oxidase subunit 8A [Source:MGI Symbol;Acc:MGI:105959]	Cox8a	582.451	558.453	719.504	691.253	680.592	719.101		0.282883	0.0190333	0.00218081
	ENSMUSG00000038812	tRNA methyltransferase 11-2 [Source:MGI Symbol;Acc:MGI:1914924]	Trmt112	79.6184	77.3234	90.4262	103.287	96.1204	95.3574		0.283719	0.0190721	0.00218776
	ENSMUSG00000031012	calcium/calmodulin-dependent serine protein kinase (MAGUK family) [Source:MGI Symbol;Acc:MGI:1309489]	Cask	0.420222	0.249013	0.499671	0.88786	0.829421	0.598549		0.904733	0.0192203	0.00220728
	ENSMUSG00000064345	mitochondrially encoded NADH dehydrogenase 2 [Source:MGI Symbol;Acc:MGI:102500]	mt-Nd2	4407.36	4706.26	4942.01	3947.76	3736.6	3826.86		-0.245309	0.0192358	0.00221158
	ENSMUSG00000037894	H2A.Z variant histone 1 [Source:MGI Symbol;Acc:MGI:1888388]	H2az1	385.028	379.537	471.014	446.406	488.243	474.02		0.283626	0.0194095	0.00223548
	ENSMUSG00000017386	TNF receptor associated factor 4 [Source:MGI Symbol;Acc:MGI:1202880]	Traf4	27.2383	26.7475	24.6766	38.1452	27.585	33.1217		0.317078	0.0194095	0.00223665
	ENSMUSG00000046668	CXXC finger 5 [Source:MGI Symbol;Acc:MGI:1914643]	Cxxc5	2.168	1.41317	2.16051	4.99185	3.04697	3.38469		0.924577	0.0196086	0.00226216
	ENSMUSG00000079442	ST6 (alpha-N-acetyl-neuraminyl-2,3-beta-galactosyl-1,3)-N-acetylgalactosaminide alpha-2,6-sialyltransferase 4 [Source:MGI Symbol;Acc:MGI:1341894]	St6galnac4	54.1481	51.0812	58.3699	61.3269	62.4091	62.8102		0.247313	0.0196126	0.00226518
	ENSMUSG00000029714	GRB10 interacting GYF protein 1 [Source:MGI Symbol;Acc:MGI:1888677]	Gigyf1	42.1387	37.4504	35.5266	64.5533	38.8859	52.1023		0.400118	0.0196377	0.00227067
	ENSMUSG00000021760	glutathione peroxidase 8 (putative) [Source:MGI Symbol;Acc:MGI:1916840]	Gpx8	0.222238	0.434585	0.678253	0	0.100523	0		-2.68337	0.0196476	0.00227629
	ENSMUSG00000083022	ribosomal protein S15A, pseudogene 6 [Source:MGI Symbol;Acc:MGI:3650298]	Rps15a-ps6	46.2254	52.1501	60.9782	67.3581	53.8802	81.897		0.573093	0.0196476	0.00227695
	ENSMUSG00000037661	G protein-coupled receptor 160 [Source:MGI Symbol;Acc:MGI:1919112]	Gpr160	8.84345	7.79367	5.62133	4.71006	6.40511	5.56826		-0.463277	0.0197137	0.00228721
	ENSMUSG00000021981	calcium binding protein 39-like [Source:MGI Symbol;Acc:MGI:1914081]	Cab39l	30.0451	30.0257	27.9206	27.4772	26.7335	24.9802		-0.192762	0.0197716	0.00229651
	ENSMUSG00000024659	annexin A1 [Source:MGI Symbol;Acc:MGI:96819]	Anxa1	48.8053	55.0205	55.6034	12.1122	51.8235	26.5131		-0.929195	0.0198165	0.00230951
	ENSMUSG00000064368	mitochondrially encoded NADH dehydrogenase 6 [Source:MGI Symbol;Acc:MGI:102495]	mt-Nd6	165.591	131.046	171.393	110.154	118.136	106.311		-0.467976	0.0198165	0.00230852
	ENSMUSG00000027404	small nuclear ribonucleoprotein B [Source:MGI Symbol;Acc:MGI:98342]	Snrpb	442.414	427.325	505.563	496.069	544.653	512.469		0.235598	0.0198165	0.00230918
	ENSMUSG00000038604	RHO family interacting cell polarization regulator 1 [Source:MGI Symbol;Acc:MGI:1922937]	Ripor1	24.8893	25.167	21.3569	35.4688	25.5164	28.861		0.272459	0.0199613	0.00232901
	ENSMUSG00000087260	late endosomal/lysosomal adaptor, MAPK and MTOR activator 5 [Source:MGI Symbol;Acc:MGI:1915826]	Lamtor5	167.038	171.221	181.953	145.449	153.732	139.196		-0.241913	0.0200348	0.00234021
	ENSMUSG00000042831	alkB homolog 6 [Source:MGI Symbol;Acc:MGI:2142037]	Alkbh6	7.234	6.22232	7.96616	9.75852	7.85977	9.56982		0.433191	0.0200553	0.00234524
	ENSMUSG00000056429	trans-golgi network protein [Source:MGI Symbol;Acc:MGI:105080]	Tgoln1	142.842	138.46	120.646	126.934	121.719	119.476		-0.164265	0.020105	0.00235369
	ENSMUSG00000027984	hydroxyacyl-Coenzyme A dehydrogenase [Source:MGI Symbol;Acc:MGI:96009]	Hadh	35.7056	35.8109	36.9085	45.4781	41.0639	39.395		0.190872	0.0201105	0.00235696
	ENSMUSG00000019907	protein phosphatase 1, regulatory subunit 12A [Source:MGI Symbol;Acc:MGI:1309528]	Ppp1r12a	121.709	124.5	105.051	111.461	100.238	106.731		-0.156066	0.0201416	0.00236589
	ENSMUSG00000003099	protein phosphatase 5, catalytic subunit [Source:MGI Symbol;Acc:MGI:102666]	Ppp5c	114.633	118.557	133.924	130.91	132.021	136.32		0.202953	0.0201416	0.00236331
	ENSMUSG00000030019	F-box and leucine-rich repeat protein 14 [Source:MGI Symbol;Acc:MGI:2141676]	Fbxl14	111.107	103.755	111.448	125.866	119.108	125.916		0.227603	0.0201825	0.00237334
	ENSMUSG00000022760	THAP domain containing 7 [Source:MGI Symbol;Acc:MGI:1916259]	Thap7	36.5693	33.7994	41.8694	42.2563	41.4227	44.325		0.282136	0.020201	0.00238082
	ENSMUSG00000015605	serum response factor [Source:MGI Symbol;Acc:MGI:106658]	Srf	45.8484	44.815	47.2446	57.4391	46.0283	56.951		0.288614	0.020201	0.00237869
	ENSMUSG00000100561	predicted gene 7516 [Source:MGI Symbol;Acc:MGI:3643007]	Gm7516	0.989682	1.72028	1.00681	2.83578	1.93983	3.41139		1.26227	0.0202991	0.00239506
	ENSMUSG00000093843	NA	NA	0	0	0	2.91167	1.10312	2.29266		2.85477	0.0202991	0.00239769
	ENSMUSG00000102759	predicted gene 10463 [Source:MGI Symbol;Acc:MGI:3642170]	Gm10463	0.120927	0.210197	0.210891	0.0769995	0.145861	0		-2.44788	0.020458	0.00243519
	ENSMUSG00000020521	ring finger protein, transmembrane 1 [Source:MGI Symbol;Acc:MGI:1924142]	Rnft1	23.9371	24.3534	22.9168	19.5629	21.4312	19.2549		-0.261481	0.020458	0.00242718
	ENSMUSG00000031232	magnesium transporter 1 [Source:MGI Symbol;Acc:MGI:1914325]	Magt1	76.9953	70.9682	64.1389	55.232	69.5405	59.6346		-0.234305	0.020458	0.0024224
	ENSMUSG00000052681	RAS related protein 1b [Source:MGI Symbol;Acc:MGI:894315]	Rap1b	650.059	619.683	668.417	496.158	600.673	536.592		-0.217817	0.020458	0.00242685
	ENSMUSG00000040007	bromo adjacent homology domain containing 1 [Source:MGI Symbol;Acc:MGI:2139371]	Bahd1	28.9134	29.9789	30.5024	34.4122	32.5937	33.8939		0.211742	0.020458	0.00243792
	ENSMUSG00000075327	zinc finger and BTB domain containing 2 [Source:MGI Symbol;Acc:MGI:2685949]	Zbtb2	17.3084	16.9438	16.1667	22.5951	17.4723	19.6413		0.228234	0.020458	0.00243751
	ENSMUSG00000037966	ninjurin 1 [Source:MGI Symbol;Acc:MGI:1196617]	Ninj1	17.6533	22.4338	20.2442	26.7083	20.1302	27.8219		0.429108	0.020458	0.00243477
	ENSMUSG00000023009	NCK-associated protein 5-like [Source:MGI Symbol;Acc:MGI:3609653]	Nckap5l	4.67952	4.30982	5.23759	13.1416	4.73876	7.15677		0.655298	0.020458	0.00243227
	ENSMUSG00000030315	vestigial like family member 4 [Source:MGI Symbol;Acc:MGI:2652840]	Vgll4	61.5929	61.4743	61.047	79.9358	59.9757	70.2171		0.199147	0.0205926	0.00245666
	ENSMUSG00000026097	ORM1-like 1 (S. cerevisiae) [Source:MGI Symbol;Acc:MGI:2181669]	Ormdl1	17.6001	19.1742	19.4423	14.2367	15.0273	15.2674		-0.269742	0.0206091	0.0024629
	ENSMUSG00000042535	GTP binding protein 1 [Source:MGI Symbol;Acc:MGI:109443]	Gtpbp1	164.856	156.823	145.527	186.451	162.617	179.548		0.185022	0.0206091	0.00246866
	ENSMUSG00000036599	carbohydrate sulfotransferase 12 [Source:MGI Symbol;Acc:MGI:1929064]	Chst12	74.9398	61.253	58.2955	89.2349	70.5144	80.4606		0.280316	0.0206091	0.00246943
	ENSMUSG00000025025	MAX interactor 1, dimerization protein [Source:MGI Symbol;Acc:MGI:97245]	Mxi1	12.118	12.1487	11.534	19.187	13.1087	14.6169		0.324709	0.0206091	0.00246611
	ENSMUSG00000021537	centrin 3 [Source:MGI Symbol;Acc:MGI:1097706]	Cetn3	102.05	107.533	109.862	84.25	99.5272	87.0381		-0.226552	0.0207042	0.00248355
	ENSMUSG00000032946	RAS, guanyl releasing protein 2 [Source:MGI Symbol;Acc:MGI:1333849]	Rasgrp2	41.4599	36.7769	37.0623	54.6519	41.0962	50.0609		0.356767	0.0207696	0.00249411
	ENSMUSG00000072501	PHD finger protein 20-like 1 [Source:MGI Symbol;Acc:MGI:2444412]	Phf20l1	39.8743	37.4947	31.8421	32.8252	31.4891	32.666		-0.187721	0.0207973	0.00250016
	ENSMUSG00000034343	ubiquitin-conjugating enzyme E2F (putative) [Source:MGI Symbol;Acc:MGI:1915171]	Ube2f	14.2635	13.6156	14.6769	11.2836	11.6166	11.8612		-0.239848	0.0208055	0.00250389
	ENSMUSG00000030357	FK506 binding protein 4 [Source:MGI Symbol;Acc:MGI:95543]	Fkbp4	183.366	187.772	192.444	207.528	219.365	205.906		0.182208	0.0208892	0.00251669
	ENSMUSG00000071064	zinc finger protein 827 [Source:MGI Symbol;Acc:MGI:2444807]	Zfp827	7.42556	6.41489	6.88069	13.0687	7.7654	8.87003		0.411543	0.0209275	0.00252404
	ENSMUSG00000042506	ubiquitin specific peptidase 22 [Source:MGI Symbol;Acc:MGI:2144157]	Usp22	58.7506	57.5753	56.2795	74.1201	56.2531	66.3883		0.198883	0.0209836	0.00253357
	ENSMUSG00000051412	NA	NA	47.6564	46.4311	45.9634	37.2216	41.6153	40.0053		-0.211105	0.0209965	0.0025387
	ENSMUSG00000006392	mediator complex subunit 8 [Source:MGI Symbol;Acc:MGI:1915269]	Med8	58.2845	58.4798	57.1165	50.1461	52.165	49.1742		-0.202043	0.0209965	0.00254338
	ENSMUSG00000072940	predicted pseudogene 10443 [Source:MGI Symbol;Acc:MGI:3704272]	Gm10443	122.552	127.958	120.886	219.803	142.972	162.648		0.431849	0.0209965	0.00254092
	ENSMUSG00000030768	dispatched RND transporter family member 1 [Source:MGI Symbol;Acc:MGI:1916147]	Disp1	7.9136	9.93887	8.96093	14.2439	9.39742	11.6306		0.409766	0.0210728	0.00255539
	ENSMUSG00000001999	biliverdin reductase A [Source:MGI Symbol;Acc:MGI:88170]	Blvra	45.8478	48.5981	46.2055	33.4223	43.0264	38.0431		-0.27351	0.0211684	0.00256976
	ENSMUSG00000023495	poly(rC) binding protein 4 [Source:MGI Symbol;Acc:MGI:1890471]	Pcbp4	10.341	8.92819	10.9919	11.4926	12.7365	12.1838		0.320236	0.0212001	0.00257639
	ENSMUSG00000031974	ATP-binding cassette, sub-family B (MDR/TAP), member 10 [Source:MGI Symbol;Acc:MGI:1860508]	Abcb10	16.5781	16.4296	15.9414	11.2362	12.7465	13.4237		-0.313718	0.0212581	0.00258622
	ENSMUSG00000020483	dynein light chain LC8-type 2 [Source:MGI Symbol;Acc:MGI:1915347]	Dynll2	108.153	106.537	103.882	119.885	119.055	117.317		0.164848	0.0212753	0.0025911
	ENSMUSG00000019873	receptor accessory protein 3 [Source:MGI Symbol;Acc:MGI:88930]	Reep3	29.6537	29.4148	24.4984	25.4931	25.5685	24.709		-0.178566	0.0212836	0.0025977
	ENSMUSG00000032092	myelin protein zero-like 2 [Source:MGI Symbol;Acc:MGI:1289160]	Mpzl2	0	0	0	0.0478871	0.0302376	0.0314221		2.17792	0.0212836	0.0025958
	ENSMUSG00000042978	SH3-binding kinase 1 [Source:MGI Symbol;Acc:MGI:2135937]	Sbk1	28.1639	22.1383	19.7737	38.2012	27.925	32.1236		0.422382	0.0213297	0.00260612
	ENSMUSG00000087150	cDNA sequence BC064078 [Source:MGI Symbol;Acc:MGI:3040692]	BC064078	4.66359	3.81474	3.70774	2.31447	2.60578	2.87978		-0.574708	0.0213408	0.00261027
	ENSMUSG00000060743	H3.3 histone A [Source:MGI Symbol;Acc:MGI:1097686]	H3f3a	91.2278	88.5587	103.949	104.02	102.702	109.631		0.249487	0.0213419	0.0026132
	ENSMUSG00000015944	cytosolic arginine sensor for mTORC1 subunit 2 [Source:MGI Symbol;Acc:MGI:1933384]	Castor2	5.39132	5.02033	4.04296	2.92777	3.70669	3.48986		-0.514208	0.0213513	0.00261715
	ENSMUSG00000042331	sperm antigen with calponin homology and coiled-coil domains 1 [Source:MGI Symbol;Acc:MGI:2442356]	Specc1	10.735	8.61375	8.3206	4.4895	8.78136	6.97863		-0.441557	0.0213605	0.00262231
	ENSMUSG00000060441	tripartite motif-containing 5 [Source:MGI Symbol;Acc:MGI:3646853]	Trim5	18.2726	19.7071	15.3279	15.0712	11.0772	14.2109		-0.390028	0.0213605	0.00262387
	ENSMUSG00000058297	sparc/osteonectin, cwcv and kazal-like domains proteoglycan 2 [Source:MGI Symbol;Acc:MGI:1891351]	Spock2	2.08364	1.17984	2.31241	3.05554	2.81791	2.77001		0.721338	0.0213816	0.00262928
	ENSMUSG00000040483	XIAP associated factor 1 [Source:MGI Symbol;Acc:MGI:3772572]	Xaf1	17.1612	19.1994	16.4801	14.0426	15.4349	14.1016		-0.289916	0.0214111	0.00263571
	ENSMUSG00000106847	paternally expressed 13 [Source:MGI Symbol;Acc:MGI:2663476]	Peg13	8.52753	8.80366	8.08055	7.81523	7.62518	6.23252		-0.342266	0.0214341	0.00264136
	ENSMUSG00000052593	a disintegrin and metallopeptidase domain 17 [Source:MGI Symbol;Acc:MGI:1096335]	Adam17	52.4639	51.4821	41.4608	41.387	44.2803	43.3981		-0.191448	0.0214758	0.00264992
	ENSMUSG00000028833	neurochondrin [Source:MGI Symbol;Acc:MGI:1347351]	Ncdn	64.3471	56.8385	65.3058	70.8427	76.3276	70.7306		0.243984	0.0214758	0.00265212
	ENSMUSG00000039994	timeless circadian clock 1 [Source:MGI Symbol;Acc:MGI:1321393]	Timeless	70.4619	64.1272	66.6721	77.5215	73.5799	77.7332		0.217178	0.0215418	0.00266531
	ENSMUSG00000081434	predicted gene 14165 [Source:MGI Symbol;Acc:MGI:3650537]	Gm14165	9.6636	9.72763	10.4531	14.3706	13.3898	15.0643		0.597058	0.0215418	0.00266592
	ENSMUSG00000020608	structural maintenance of chromosomes 6 [Source:MGI Symbol;Acc:MGI:1914491]	Smc6	82.9382	82.1733	75.7317	73.7798	74.8104	70.6304		-0.161857	0.0215472	0.00267056
	ENSMUSG00000012848	ribosomal protein S5 [Source:MGI Symbol;Acc:MGI:1097682]	Rps5	2301.45	2406.01	2675.99	2900.08	2714.14	2673.6		0.198347	0.0215472	0.00267224
	ENSMUSG00000112302	predicted gene, 48226 [Source:MGI Symbol;Acc:MGI:6097627]	Gm48226	2.82892	1.68285	2.94574	4.90547	3.42878	3.718		0.70316	0.021598	0.00268137
	ENSMUSG00000010095	solute carrier family 3 (activators of dibasic and neutral amino acid transport), member 2 [Source:MGI Symbol;Acc:MGI:96955]	Slc3a2	121.039	124.067	115.097	147.345	137.857	133.516		0.186485	0.0216645	0.00269814
	ENSMUSG00000041958	phosphatidylinositol glycan anchor biosynthesis, class S [Source:MGI Symbol;Acc:MGI:2687325]	Pigs	92.566	90.5669	90.663	92.6362	97.9344	106.192		0.192422	0.0216645	0.00269665
	ENSMUSG00000025034	tripartite motif-containing 8 [Source:MGI Symbol;Acc:MGI:1933302]	Trim8	46.625	43.8785	44.4341	59.1664	45.3601	51.948		0.212649	0.0216645	0.00269651
	ENSMUSG00000021678	coagulation factor II (thrombin) receptor-like 1 [Source:MGI Symbol;Acc:MGI:101910]	F2rl1	63.1758	55.8851	47.0489	47.274	48.7729	44.8123		-0.306129	0.0216952	0.00270482
	ENSMUSG00000026509	calpain 2 [Source:MGI Symbol;Acc:MGI:88264]	Capn2	116.232	118.317	105.737	70.6796	106.842	92.3934		-0.311378	0.0217057	0.00270896
	ENSMUSG00000019791	histidine triad nucleotide binding protein 3 [Source:MGI Symbol;Acc:MGI:1914097]	Hint3	7.4484	7.45458	7.562	6.06612	6.24185	5.59374		-0.353149	0.0217774	0.00272077
	ENSMUSG00000044496	RIKEN cDNA 2510039O18 gene [Source:MGI Symbol;Acc:MGI:1924284]	2510039O18Rik	103.532	98.7825	94.3681	115.095	105.348	110.878		0.162945	0.0218171	0.00272859
	ENSMUSG00000015134	aldehyde dehydrogenase family 1, subfamily A3 [Source:MGI Symbol;Acc:MGI:1861722]	Aldh1a3	0.0756677	0.0328817	0.0219935	0	0	0		-2.32909	0.0218939	0.00274667
	ENSMUSG00000027834	serine (or cysteine) peptidase inhibitor, clade I, member 1 [Source:MGI Symbol;Acc:MGI:1194506]	Serpini1	4.45927	4.50069	4.15319	2.94628	3.74487	3.45583		-0.342132	0.0218939	0.00274669
	ENSMUSG00000051335	glucose-fructose oxidoreductase domain containing 1 [Source:MGI Symbol;Acc:MGI:2145304]	Gfod1	20.5504	19.1664	21.1034	24.5505	22.8585	22.8123		0.21834	0.0218939	0.0027468
	ENSMUSG00000040594	RAN binding protein 17 [Source:MGI Symbol;Acc:MGI:1929706]	Ranbp17	0.0130949	0.0682851	0.137021	0.137578	0.130308	0.160033		1.81076	0.0219482	0.00275649
	ENSMUSG00000044703	PHD finger protein 11A [Source:MGI Symbol;Acc:MGI:1918441]	Phf11a	10.1487	13.9033	11.5493	7.311	6.69123	7.60015		-0.629229	0.0219612	0.00276677
	ENSMUSG00000026970	RNA binding motif, single stranded interacting protein 1 [Source:MGI Symbol;Acc:MGI:1861774]	Rbms1	166.54	163.576	145.98	126.021	143.056	141.959		-0.188208	0.0219612	0.00276574
	ENSMUSG00000014470	ring finger protein 166 [Source:MGI Symbol;Acc:MGI:1915968]	Rnf166	139.215	137.283	137.251	180.034	133.317	161.316		0.218806	0.0219612	0.00276445
	ENSMUSG00000061028	CLK4-associating serine/arginine rich protein [Source:MGI Symbol;Acc:MGI:1855695]	Clasrp	15.9675	16.0309	15.7237	20.349	15.1782	19.396		0.251554	0.0219675	0.00277044
	ENSMUSG00000037373	C-terminal binding protein 1 [Source:MGI Symbol;Acc:MGI:1201685]	Ctbp1	175.772	171.657	180.107	188.631	187.607	196.154		0.171694	0.0219945	0.00279403
	ENSMUSG00000039989	chromobox 4 [Source:MGI Symbol;Acc:MGI:1195985]	Cbx4	49.1738	42.3683	46.0749	53.5848	49.9442	52.7201		0.210965	0.0219945	0.00279381
	ENSMUSG00000052253	zinc finger protein 622 [Source:MGI Symbol;Acc:MGI:1289282]	Zfp622	19.1583	21.6544	21.847	27.2526	22.4289	24.152		0.261534	0.0219945	0.00278041
	ENSMUSG00000060227	golgi membrane protein 2 [Source:MGI Symbol;Acc:MGI:2443129]	Golm2	11.2318	12.6728	12.1513	18.4174	12.031	14.8009		0.324311	0.0219945	0.00279316
	ENSMUSG00000061848	predicted gene 5805 [Source:MGI Symbol;Acc:MGI:3644633]	Gm5805	27.3255	38.6196	40.3059	47.8075	34.4229	57.138		0.646957	0.0219945	0.00277828
	ENSMUSG00000059326	colony stimulating factor 2 receptor, alpha, low-affinity (granulocyte-macrophage) [Source:MGI Symbol;Acc:MGI:1339754]	Csf2ra	1.9064	2.00939	2.26361	2.94432	2.56857	3.35554		0.669548	0.0219945	0.00278676
	ENSMUSG00000091460	predicted pseudogene 7808 [Source:MGI Symbol;Acc:MGI:3643360]	Gm7808	21.9665	26.2832	23.0902	34.2012	25.5884	46.3923		0.784493	0.0219945	0.00279138
	ENSMUSG00000063383	zinc finger protein 947 [Source:MGI Symbol;Acc:MGI:3646759]	Zfp947	0.121643	0.0528603	0.176783	0.271093	0.403491	0.381179		1.72018	0.0220035	0.00279805
	ENSMUSG00000054752	fibronectin type III and SPRY domain containing 1-like [Source:MGI Symbol;Acc:MGI:2442443]	Fsd1l	1.88926	1.80825	1.57441	6.48693	2.54202	2.82145		0.790541	0.0220082	0.00280154
	ENSMUSG00000047454	gephyrin [Source:MGI Symbol;Acc:MGI:109602]	Gphn	21.3398	19.8829	17.2536	28.8671	22.0025	23.4484		0.268151	0.0220439	0.00280898
	ENSMUSG00000117284	predicted gene 7072 [Source:MGI Symbol;Acc:MGI:3648314]	Gm7072	20.1127	19.4029	17.7717	16.5206	16.7392	15.5672		-0.269815	0.0220547	0.00281547
	ENSMUSG00000030629	zinc finger, AN1-type domain 6 [Source:MGI Symbol;Acc:MGI:1929510]	Zfand6	61.7911	66.0738	58.1379	59.2645	50.9213	53.5716		-0.202187	0.0220547	0.00281613
	ENSMUSG00000074785	plexin C1 [Source:MGI Symbol;Acc:MGI:1890127]	Plxnc1	12.637	12.7649	11.2746	10.0848	10.208	10.4767		-0.240279	0.0221092	0.00283046
	ENSMUSG00000047180	neuralized E3 ubiquitin protein ligase 3 [Source:MGI Symbol;Acc:MGI:2429944]	Neurl3	207.638	227.18	194.818	178.231	193.635	182.877		-0.190664	0.0221092	0.00283179
	ENSMUSG00000056116	histocompatibility 2, T region locus 22 [Source:MGI Symbol;Acc:MGI:95956]	H2-T22	137.43	148.168	129.176	117.514	128.892	120.794		-0.183048	0.0221092	0.00282842
	ENSMUSG00000027281	SLX4 interacting protein [Source:MGI Symbol;Acc:MGI:1921493]	Slx4ip	12.0693	11.3379	8.89049	8.77751	10.7756	8.23145		-0.34384	0.0222321	0.00285044
	ENSMUSG00000035246	phosphate cytidylyltransferase 1, choline, beta isoform [Source:MGI Symbol;Acc:MGI:2147987]	Pcyt1b	5.10852	5.12945	3.16556	3.05212	3.28413	3.20842		-0.536504	0.0222382	0.00286446
	ENSMUSG00000027001	dual specificity phosphatase 19 [Source:MGI Symbol;Acc:MGI:1915332]	Dusp19	7.1226	6.59623	5.46411	5.53898	5.56316	4.3541		-0.476934	0.0222382	0.00287746
	ENSMUSG00000113585	predicted gene, 19605 [Source:MGI Symbol;Acc:MGI:5011790]	Gm19605	12.4699	11.5369	9.032	7.97214	8.91546	8.55565		-0.404064	0.0222382	0.00287431
	ENSMUSG00000053541	GTPase, very large interferon inducible, pseudogene 6 [Source:MGI Symbol;Acc:MGI:3647753]	Gvin-ps6	83.5849	69.3048	70.7221	65.422	74.1349	55.1671		-0.326425	0.0222382	0.00286743
	ENSMUSG00000070372	capping protein (actin filament) muscle Z-line, alpha 1 [Source:MGI Symbol;Acc:MGI:106227]	Capza1	250.091	250.87	248.288	204.625	235.605	216.314		-0.176038	0.0222382	0.0028593
	ENSMUSG00000012422	transmembrane protein 167 [Source:MGI Symbol;Acc:MGI:1913324]	Tmem167	36.1954	34.3469	35.104	30.0218	32.8999	30.5824		-0.168809	0.0222382	0.00286422
	ENSMUSG00000025404	R3H domain containing 2 [Source:MGI Symbol;Acc:MGI:1919000]	R3hdm2	35.5562	34.9425	33.4297	43.9367	36.2304	38.509		0.169944	0.0222382	0.00285612
	ENSMUSG00000028959	Fas-activated serine/threonine kinase [Source:MGI Symbol;Acc:MGI:1913837]	Fastk	40.9661	38.8913	37.5333	48.6676	39.6139	47.2003		0.237529	0.0222382	0.00287687
	ENSMUSG00000020232	high mobility group 20B [Source:MGI Symbol;Acc:MGI:1341190]	Hmg20b	19.0081	17.8379	18.7352	23.0646	21.0763	22.2843		0.27997	0.0222382	0.00287637
	ENSMUSG00000051212	G protein-coupled receptor 183 [Source:MGI Symbol;Acc:MGI:2442034]	Gpr183	36.3839	30.8678	33.0977	14.9868	27.6233	24.9512		-0.478177	0.0222634	0.0028974
	ENSMUSG00000023048	proline rich 13 [Source:MGI Symbol;Acc:MGI:1913401]	Prr13	312.752	302.269	258.281	234.201	249.544	263.804		-0.196168	0.0222634	0.00288812
	ENSMUSG00000031133	Rac/Cdc42 guanine nucleotide exchange factor (GEF) 6 [Source:MGI Symbol;Acc:MGI:1920591]	Arhgef6	94.6517	93.4819	84.8853	77.1635	84.6652	82.2467		-0.153448	0.0222634	0.00289484
	ENSMUSG00000109336	sterile alpha motif domain containing 4B [Source:MGI Symbol;Acc:MGI:2448542]	Samd4b	26.9197	26.3531	25.7773	31.4013	27.4644	30.3679		0.198535	0.0222634	0.00290255
	ENSMUSG00000058239	upstream transcription factor 2 [Source:MGI Symbol;Acc:MGI:99961]	Usf2	75.0726	72.5	75.0761	97.0026	78.087	84.3256		0.21551	0.0222634	0.00290407
	ENSMUSG00000006019	DEAH (Asp-Glu-Ala-His) box polypeptide 34 [Source:MGI Symbol;Acc:MGI:1918973]	Dhx34	15.228	14.3359	13.6099	21.0787	15.7701	17.9599		0.315159	0.0222634	0.00290126
	ENSMUSG00000020027	suppressor of cytokine signaling 2 [Source:MGI Symbol;Acc:MGI:1201787]	Socs2	22.6894	21.0575	22.4482	37.3553	24.9249	27.3945		0.371046	0.0222634	0.0028905
	ENSMUSG00000035545	leukocyte receptor cluster (LRC) member 8 [Source:MGI Symbol;Acc:MGI:2142195]	Leng8	96.7858	94.1513	82.9661	140.393	85.2009	127.535		0.388896	0.0222634	0.00289981
	ENSMUSG00000052369	transmembrane protein 106C [Source:MGI Symbol;Acc:MGI:1196384]	Tmem106c	12.8701	13.4725	11.5562	16.268	15.3218	15.6071		0.304247	0.0224551	0.00293202
	ENSMUSG00000006676	ubiquitin specific peptidase 19 [Source:MGI Symbol;Acc:MGI:1918722]	Usp19	78.6319	81.4002	71.4757	97.7328	78.3832	89.5772		0.194083	0.0224732	0.00294028
	ENSMUSG00000029913	PR domain containing 5 [Source:MGI Symbol;Acc:MGI:1918029]	Prdm5	0.0501141	0.146997	0.14202	0.622242	0.158674	0.318		1.7155	0.0224732	0.00293937
	ENSMUSG00000039244	RIKEN cDNA E130309D02 gene [Source:MGI Symbol;Acc:MGI:2442621]	E130309D02Rik	31.1025	29.6495	33.2498	35.4369	33.8367	35.4689		0.210048	0.0225191	0.00294923
	ENSMUSG00000114995	predicted gene, 49284 [Source:MGI Symbol;Acc:MGI:6118771]	Gm49284	2.76462	2.20661	2.45989	3.39497	3.98117	3.87192		0.629811	0.022597	0.0029624
	ENSMUSG00000095426	T cell receptor alpha variable 6D-5 [Source:MGI Symbol;Acc:MGI:3649416]	Trav6d-5	2.0672	1.79663	3.30469	4.60698	5.61025	5.18223		1.22853	0.0226093	0.00296698
	ENSMUSG00000028480	GLI pathogenesis-related 2 [Source:MGI Symbol;Acc:MGI:1917770]	Glipr2	642.346	673.613	614.824	544.479	597.078	573.279		-0.159849	0.0226676	0.00297819
	ENSMUSG00000024548	SET binding protein 1 [Source:MGI Symbol;Acc:MGI:1933199]	Setbp1	23.3888	21.751	21.8841	41.0908	26.673	26.8929		0.354428	0.0226676	0.00298057
	ENSMUSG00000022587	lymphocyte antigen 6 complex, locus E [Source:MGI Symbol;Acc:MGI:106651]	Ly6e	1241.59	1215.08	1007.9	740.809	1064.39	1008.94		-0.261861	0.0226741	0.00298649
	ENSMUSG00000058546	ribosomal protein L23A [Source:MGI Symbol;Acc:MGI:3040672]	Rpl23a	2604.44	2746.11	2717.12	3203.75	2857.95	2928.28		0.161206	0.0226741	0.00298737
	ENSMUSG00000087107	expressed sequence AI662270 [Source:MGI Symbol;Acc:MGI:2144254]	AI662270	93.385	92.1214	89.1403	70.5397	78.8458	80.7416		-0.199695	0.0226923	0.00299274
	ENSMUSG00000022637	Casitas B-lineage lymphoma b [Source:MGI Symbol;Acc:MGI:2146430]	Cblb	97.0197	97.089	72.5011	93.5464	81.3216	74.3382		-0.235221	0.0229285	0.003032
	ENSMUSG00000073639	RAB18, member RAS oncogene family [Source:MGI Symbol;Acc:MGI:102790]	Rab18	43.674	43.7271	42.0853	36.5989	39.171	38.0684		-0.168267	0.0229285	0.00302906
	ENSMUSG00000002871	transmembrane protein, adipocyte asscociated 1 [Source:MGI Symbol;Acc:MGI:1345190]	Tpra1	18.9295	18.5992	16.0679	23.6798	18.6398	22.4933		0.281582	0.0229285	0.00303291
	ENSMUSG00000103983	predicted gene, 20045 [Source:MGI Symbol;Acc:MGI:5012230]	Gm20045	0.48026	0.462767	0.655476	0.737915	0.887817	0.922594		0.840615	0.023045	0.00305135
	ENSMUSG00000028295	small integral membrane protein 8 [Source:MGI Symbol;Acc:MGI:1913541]	Smim8	36.3239	39.1099	34.4309	29.6111	32.0928	29.5799		-0.279807	0.0230535	0.00305779
	ENSMUSG00000079502	cilia and flagella associated protein 77 [Source:MGI Symbol;Acc:MGI:2685669]	Cfap77	1.15387	1.04141	0.967456	1.69551	1.96724	1.91914		0.820247	0.0230535	0.00305852
	ENSMUSG00000000959	oxidase assembly 1-like [Source:MGI Symbol;Acc:MGI:1916339]	Oxa1l	42.8238	43.0205	38.7768	50.4346	41.3875	48.9037		0.1982	0.0230745	0.00306522
	ENSMUSG00000058486	WD repeat domain 91 [Source:MGI Symbol;Acc:MGI:2141558]	Wdr91	16.4215	16.7414	17.2224	21.9487	17.3013	19.6499		0.246946	0.0230745	0.00306734
	ENSMUSG00000079017	interferon, alpha-inducible protein 27 like 2A [Source:MGI Symbol;Acc:MGI:1924183]	Ifi27l2a	453.989	457.084	623.302	281.548	416.158	363.181		-0.388751	0.0231968	0.00308665
	ENSMUSG00000026500	cytochrome c oxidase assembly protein 20 [Source:MGI Symbol;Acc:MGI:1913609]	Cox20	114.211	108.144	99.4742	83.7657	98.1895	89.2658		-0.259001	0.0232237	0.00309327
	ENSMUSG00000047423	expressed sequence AI837181 [Source:MGI Symbol;Acc:MGI:2147598]	AI837181	80.6558	79.4517	78.6935	94.5635	84.9206	93.9976		0.232419	0.0232831	0.00310729
	ENSMUSG00000042099	KN motif and ankyrin repeat domains 3 [Source:MGI Symbol;Acc:MGI:1098615]	Kank3	4.35804	4.00493	5.01491	6.72131	4.26562	6.98488		0.578533	0.0232831	0.00310462
	ENSMUSG00000027603	gamma-glutamyltransferase 7 [Source:MGI Symbol;Acc:MGI:1913385]	Ggt7	3.31804	3.16281	4.07546	5.35001	3.77626	5.66826		0.65268	0.0232908	0.00311136
	ENSMUSG00000029071	dishevelled segment polarity protein 1 [Source:MGI Symbol;Acc:MGI:94941]	Dvl1	27.6913	26.285	26.7072	41.0306	28.1082	32.4742		0.295252	0.0233647	0.00312431
	ENSMUSG00000050106	transmembrane channel-like gene family 8 [Source:MGI Symbol;Acc:MGI:2669037]	Tmc8	76.0981	67.81	62.8338	80.7624	73.254	82.6791		0.216148	0.0233882	0.00313358
	ENSMUSG00000022768	coiled-coil domain containing 116 [Source:MGI Symbol;Acc:MGI:1924122]	Ccdc116	4.24311	4.24987	4.98584	6.52379	5.00877	5.7887		0.413113	0.0233882	0.00313294
	ENSMUSG00000039096	radical S-adenosyl methionine domain containing 1 [Source:MGI Symbol;Acc:MGI:3039628]	Rsad1	7.18712	8.22863	8.14019	10.2335	8.37313	9.72332		0.327149	0.0234441	0.00314611
	ENSMUSG00000086567	predicted gene 2830 [Source:MGI Symbol;Acc:MGI:3781002]	Gm2830	10.8891	18.1389	20.0451	23.9785	16.4179	32.1315		0.93461	0.0234441	0.00314721
	ENSMUSG00000023074	motile sperm domain containing 1 [Source:MGI Symbol;Acc:MGI:1917630]	Mospd1	32.0035	30.8727	24.9356	20.4314	22.9896	24.9402		-0.315014	0.0234573	0.00315514
	ENSMUSG00000036180	GATA zinc finger domain containing 2A [Source:MGI Symbol;Acc:MGI:2384585]	Gatad2a	146.165	140.624	141.061	156.022	147.438	157.425		0.142708	0.0234573	0.00315477
	ENSMUSG00000033706	SET and MYND domain containing 5 [Source:MGI Symbol;Acc:MGI:108048]	Smyd5	24.3298	22.5555	26.3192	28.8666	27.143	27.2142		0.216499	0.0235002	0.00316399
	ENSMUSG00000058287	predicted gene 12253 [Source:MGI Symbol;Acc:MGI:3651568]	Gm12253	4.98101	3.47069	3.07029	1.14835	2.01995	2.01834		-1.06168	0.0235929	0.00319812
	ENSMUSG00000106478	predicted gene, 36551 [Source:MGI Symbol;Acc:MGI:5595710]	Gm36551	156.435	152.827	171.948	83.0485	142.571	115.678		-0.432103	0.0235929	0.00319179
	ENSMUSG00000057230	AP2 associated kinase 1 [Source:MGI Symbol;Acc:MGI:1098687]	Aak1	50.9877	45.8848	41.6628	41.2748	44.019	40.5331		-0.178119	0.0235929	0.00318519
	ENSMUSG00000032000	baculoviral IAP repeat-containing 3 [Source:MGI Symbol;Acc:MGI:1197007]	Birc3	41.4291	41.7347	38.335	33.9073	38.2778	35.5153		-0.176085	0.0235929	0.00319094
	ENSMUSG00000024614	thioredoxin-related transmembrane protein 3 [Source:MGI Symbol;Acc:MGI:2442418]	Tmx3	38.9113	36.8495	32.9893	33.3688	32.4115	32.1822		-0.174853	0.0235929	0.00319632
	ENSMUSG00000089832	Sh3kbp1 binding protein 1 [Source:MGI Symbol;Acc:MGI:2385803]	Shkbp1	22.1342	21.211	21.7492	24.822	22.1903	26.7087		0.260121	0.0235929	0.00318156
	ENSMUSG00000007570	Fanconi anemia, complementation group E [Source:MGI Symbol;Acc:MGI:1920025]	Fance	15.2862	14.2208	13.9655	18.4679	14.1916	19.1718		0.32566	0.0235929	0.00319245
	ENSMUSG00000086836	predicted gene 13748 [Source:MGI Symbol;Acc:MGI:3702115]	Gm13748	0.924226	1.20488	0.537271	0	0.557397	0		-2.52169	0.0236373	0.00321092
	ENSMUSG00000036309	S-phase kinase-associated protein 1 [Source:MGI Symbol;Acc:MGI:103575]	Skp1	280.466	283.099	284.333	254.144	270.112	242.617		-0.160237	0.0236373	0.00321653
	ENSMUSG00000032480	DEAH (Asp-Glu-Ala-His) box polypeptide 30 [Source:MGI Symbol;Acc:MGI:1920081]	Dhx30	27.7639	27.5858	27.2034	31.2639	29.0461	29.9879		0.141394	0.0236373	0.00321517
	ENSMUSG00000062461	ribosomal protein L27A, pseudogene 4 [Source:MGI Symbol;Acc:MGI:3648523]	Rpl27a-ps4	9.63925	10.8682	11.5856	20.155	11.5482	19.5928		0.799633	0.0236373	0.00321035
	ENSMUSG00000102336	predicted gene, 37233 [Source:MGI Symbol;Acc:MGI:5610461]	Gm37233	2.54734	2.39976	2.36715	1.59833	2.25397	1.29349		-0.726203	0.0236649	0.00322649
	ENSMUSG00000068479	microfibrillar-associated protein 1A [Source:MGI Symbol;Acc:MGI:1914782]	Mfap1a	30.9856	30.5583	26.535	25.5146	27.9556	24.3306		-0.239401	0.0236649	0.00322571
	ENSMUSG00000032656	membrane associated ring-CH-type finger 3 [Source:MGI Symbol;Acc:MGI:2443667]	Marchf3	3.83909	3.23548	2.46844	1.90747	2.4732	2.22376		-0.568138	0.0237453	0.00324058
	ENSMUSG00000095432	zinc finger protein 748 [Source:MGI Symbol;Acc:MGI:1916455]	Zfp748	18.161	18.6618	17.1811	17.3066	16.6153	14.3659		-0.247588	0.0237538	0.00324484
	ENSMUSG00000004947	deltex 2, E3 ubiquitin ligase [Source:MGI Symbol;Acc:MGI:1921448]	Dtx2	7.15408	6.93012	6.64254	8.00344	8.01495	8.1888		0.241322	0.0237951	0.0032536
	ENSMUSG00000017412	calcium channel, voltage-dependent, beta 4 subunit [Source:MGI Symbol;Acc:MGI:103301]	Cacnb4	0.428755	0.457325	0.339878	0.21096	0.329102	0.207639		-0.868786	0.0238003	0.00326368
	ENSMUSG00000022562	5-oxoprolinase (ATP-hydrolysing) [Source:MGI Symbol;Acc:MGI:1922725]	Oplah	7.00271	6.6063	5.23639	4.8591	5.3423	4.9889		-0.353216	0.0238003	0.003258
	ENSMUSG00000033762	RecQ protein-like 4 [Source:MGI Symbol;Acc:MGI:1931028]	Recql4	19.0154	16.7828	16.698	19.1609	20.0166	21.3301		0.249677	0.0238003	0.00326137
	ENSMUSG00000025352	growth differentiation factor 11 [Source:MGI Symbol;Acc:MGI:1338027]	Gdf11	14.2484	14.277	13.3992	10.898	11.6189	11.6697		-0.265924	0.0239154	0.00328572
	ENSMUSG00000033306	LIM domain containing preferred translocation partner in lipoma [Source:MGI Symbol;Acc:MGI:2441849]	Lpp	12.2865	10.9492	11.6855	8.60201	11.502	9.44482		-0.248723	0.0239154	0.00328396
	ENSMUSG00000057842	zinc finger protein 595 [Source:MGI Symbol;Acc:MGI:3040707]	Zfp595	10.7462	12.0838	9.94909	9.36422	9.37287	8.69357		-0.29485	0.0239522	0.00329707
	ENSMUSG00000034317	tripartite motif-containing 59 [Source:MGI Symbol;Acc:MGI:1914199]	Trim59	261.532	246.427	228.474	216.611	227.259	217.055		-0.170611	0.0239522	0.0032947
	ENSMUSG00000019979	apoptotic peptidase activating factor 1 [Source:MGI Symbol;Acc:MGI:1306796]	Apaf1	40.2579	41.0479	32.2471	31.1698	34.9371	33.9289		-0.194144	0.0239677	0.00330412
	ENSMUSG00000040390	mitogen-activated protein kinase kinase kinase 10 [Source:MGI Symbol;Acc:MGI:1346879]	Map3k10	5.65113	4.2517	5.58959	6.68643	6.35852	7.29478		0.489664	0.0239677	0.00330549
	ENSMUSG00000038437	myeloid/lymphoid or mixed-lineage leukemia; translocated to, 6 [Source:MGI Symbol;Acc:MGI:1935145]	Mllt6	102.418	98.7174	98.6823	119.809	107.285	111.385		0.177672	0.024117	0.00332924
	ENSMUSG00000039031	Rho GTPase activating protein 18 [Source:MGI Symbol;Acc:MGI:1921160]	Arhgap18	41.0812	42.6103	38.1137	32.7511	38.6318	34.2751		-0.221364	0.0241177	0.00333566
	ENSMUSG00000028975	peroxisomal biogenesis factor 14 [Source:MGI Symbol;Acc:MGI:1927868]	Pex14	14.2038	13.7485	13.7454	15.446	14.8985	16.8087		0.244333	0.0241177	0.00333521
	ENSMUSG00000043065	spindle and centriole associated protein 1 [Source:MGI Symbol;Acc:MGI:1196252]	Spice1	13.1805	13.623	9.84319	10.4942	10.2119	9.72254		-0.337804	0.0241457	0.00334902
	ENSMUSG00000052102	glucosamine-6-phosphate deaminase 1 [Source:MGI Symbol;Acc:MGI:1347054]	Gnpda1	40.1682	40.8854	35.9209	34.6758	36.8266	33.2157		-0.202444	0.0241457	0.00334823
	ENSMUSG00000002799	jagged 2 [Source:MGI Symbol;Acc:MGI:1098270]	Jag2	0.718946	0.653905	1.1955	1.30948	1.21003	1.28886		0.767144	0.0241457	0.00334702
	ENSMUSG00000022022	mitochondrial translational release factor 1 [Source:MGI Symbol;Acc:MGI:2384815]	Mtrf1	8.3008	7.92734	7.57478	5.90008	7.64024	5.21739		-0.482568	0.0243443	0.00337976
	ENSMUSG00000046687	predicted gene 5424 [Source:MGI Symbol;Acc:MGI:3643173]	Gm5424	7.70089	8.69262	6.30557	4.57461	6.20194	4.85573		-0.604329	0.0243906	0.00338938
	ENSMUSG00000032120	C2 calcium-dependent domain containing 2-like [Source:MGI Symbol;Acc:MGI:1919014]	C2cd2l	14.7661	15.1919	14.2155	16.7334	16.5351	17.2766		0.225183	0.024404	0.00339487
	ENSMUSG00000024862	kinesin light chain 2 [Source:MGI Symbol;Acc:MGI:107953]	Klc2	9.29592	9.14415	9.8744	12.1342	10.3717	11.5459		0.309607	0.024404	0.00339765
	ENSMUSG00000024074	cysteine rich transmembrane BMP regulator 1 (chordin like) [Source:MGI Symbol;Acc:MGI:1354756]	Crim1	32.9059	35.453	31.7929	53.841	37.0783	39.2611		0.286249	0.024408	0.00340141
	ENSMUSG00000019998	syntaxin 7 [Source:MGI Symbol;Acc:MGI:1858210]	Stx7	18.5366	19.8551	20.0682	15.0937	16.6277	15.2476		-0.295973	0.0244214	0.00340896
	ENSMUSG00000031523	deleted in liver cancer 1 [Source:MGI Symbol;Acc:MGI:1354949]	Dlc1	0.0158504	0	0.0207318	0.0681252	0.0358473	0.0372514		1.93863	0.0244214	0.00340968
	ENSMUSG00000058385	H2B clustered histone 8 [Source:MGI Symbol;Acc:MGI:2448386]	H2bc8	1.50748	0.98262	1.4788	4.49942	1.70466	5.13716		1.64426	0.0244463	0.00341635
	ENSMUSG00000054619	methyltransferase like 7A1 [Source:MGI Symbol;Acc:MGI:1916523]	Mettl7a1	16.7386	16.9658	14.5566	10.5868	14.6147	13.1201		-0.314453	0.024486	0.00342958
	ENSMUSG00000020074	cell division cycle and apoptosis regulator 1 [Source:MGI Symbol;Acc:MGI:1914750]	Ccar1	66.9916	64.696	55.5792	52.7696	60.1347	55.7738		-0.171959	0.024486	0.00343153
	ENSMUSG00000034928	ring finger protein 44 [Source:MGI Symbol;Acc:MGI:2145310]	Rnf44	91.6487	82.182	81.9654	104.32	87.6279	96.8056		0.178837	0.024486	0.0034271
	ENSMUSG00000072294	Kruppel-like factor 12 [Source:MGI Symbol;Acc:MGI:1333796]	Klf12	0.350108	0.565095	0.537886	1.25796	0.678691	0.814986		0.899481	0.0245003	0.00343675
	ENSMUSG00000016206	histocompatibility 2, M region locus 3 [Source:MGI Symbol;Acc:MGI:95915]	H2-M3	109.893	120.882	107.335	89.1043	100.22	98.0551		-0.201485	0.0245478	0.00345093
	ENSMUSG00000015733	capping protein (actin filament) muscle Z-line, alpha 2 [Source:MGI Symbol;Acc:MGI:106222]	Capza2	161.333	156.119	161.54	141.194	151.798	135.05		-0.177741	0.0245478	0.00344919
	ENSMUSG00000005125	N-myc downstream regulated gene 1 [Source:MGI Symbol;Acc:MGI:1341799]	Ndrg1	21.1331	21.5892	23.4309	30.9091	27.0238	24.6965		0.273804	0.0245478	0.00345307
	ENSMUSG00000028613	low density lipoprotein receptor-related protein 8, apolipoprotein e receptor [Source:MGI Symbol;Acc:MGI:1340044]	Lrp8	9.5996	9.22447	11.9078	10.2644	10.9673	12.3891		0.295998	0.0245655	0.00345878
	ENSMUSG00000026775	YME1-like 1 (S. cerevisiae) [Source:MGI Symbol;Acc:MGI:1351651]	Yme1l1	95.7182	95.3274	95.0527	85.492	90.3001	82.8475		-0.154869	0.0245788	0.00346419
	ENSMUSG00000024772	EH-domain containing 1 [Source:MGI Symbol;Acc:MGI:1341878]	Ehd1	47.0525	51.3835	47.1406	74.4507	54.6786	59.3024		0.327618	0.0245788	0.0034671
	ENSMUSG00000058638	zinc finger protein 110 [Source:MGI Symbol;Acc:MGI:1890378]	Zfp110	39.5248	43.597	36.1178	38.1562	35.7303	33.1935		-0.219372	0.0245927	0.00347228
	ENSMUSG00000020890	guanylate cyclase 2e [Source:MGI Symbol;Acc:MGI:105123]	Gucy2e	0.734397	0.99042	0.397476	0.205593	0.641458	0.309486		-1.10942	0.0247128	0.00349368
	ENSMUSG00000000078	Kruppel-like factor 6 [Source:MGI Symbol;Acc:MGI:1346318]	Klf6	222.111	217.817	206.65	170.98	203.33	187.61		-0.190677	0.0247128	0.00349572
	ENSMUSG00000020018	small nuclear ribonucleoprotein polypeptide F [Source:MGI Symbol;Acc:MGI:1917128]	Snrpf	214.646	204.007	237.172	233.69	257.68	252.516		0.252439	0.0247364	0.0035023
	ENSMUSG00000054855	Rho family GTPase 1 [Source:MGI Symbol;Acc:MGI:2444878]	Rnd1	0.196246	0.358175	0.171123	0.14995	0.284052	0		-2.72232	0.0247689	0.00351101
	ENSMUSG00000095079	immunoglobulin heavy constant alpha [Source:MGI Symbol;Acc:MGI:96444]	Igha	2.05145	1.99157	2.05524	4.00213	2.80349	3.56982		0.787705	0.0247689	0.0035134
	ENSMUSG00000097133	predicted gene, 26628 [Source:MGI Symbol;Acc:MGI:5477122]	Gm26628	0.948421	1.14811	0.945147	0.51763	0.306422	0.318425		-1.49592	0.0248084	0.00352224
	ENSMUSG00000052906	UBX domain protein 8 [Source:MGI Symbol;Acc:MGI:1337129]	Ubxn8	46.9708	43.8645	46.4024	33.2765	44.3987	36.7159		-0.263603	0.0248594	0.00353275
	ENSMUSG00000029869	Eph receptor B6 [Source:MGI Symbol;Acc:MGI:1096338]	Ephb6	5.00008	4.78822	4.03701	7.84152	5.69599	6.20926		0.42818	0.0249603	0.00355069
	ENSMUSG00000021967	mitochondrial ribosomal protein L57 [Source:MGI Symbol;Acc:MGI:1915090]	Mrpl57	25.7251	25.6277	40.8444	33.3	37.9552	37.9606		0.449761	0.0249603	0.00355363
	ENSMUSG00000026014	Ras association (RalGDS/AF-6) and pleckstrin homology domains 1 [Source:MGI Symbol;Acc:MGI:1924550]	Raph1	8.2661	7.18414	6.97999	5.19285	7.76567	5.73062		-0.331763	0.0249854	0.00356555
	ENSMUSG00000026623	lysophosphatidylglycerol acyltransferase 1 [Source:MGI Symbol;Acc:MGI:2446186]	Lpgat1	37.3077	35.1907	32.9852	31.4238	34.0823	30.2673		-0.182121	0.0249854	0.00356938
	ENSMUSG00000037905	Bri3 binding protein [Source:MGI Symbol;Acc:MGI:1924059]	Bri3bp	30.5885	30.2197	32.9157	32.9225	35.7199	34.9032		0.19737	0.0249854	0.00356424
	ENSMUSG00000098286	microRNA 8091 [Source:MGI Symbol;Acc:MGI:5530957]	Mir8091	11.729	5.46097	9.49694	22.4052	23.4949	17.3269		1.11841	0.0249854	0.00357359
	ENSMUSG00000065037	NA	NA	22.8683	24.7674	26.3831	149.197	36.6012	171.323		2.42871	0.0249854	0.00357277
	ENSMUSG00000040710	ST8 alpha-N-acetyl-neuraminide alpha-2,8-sialyltransferase 4 [Source:MGI Symbol;Acc:MGI:106018]	St8sia4	17.6032	15.1127	12.6861	11.9469	13.8429	12.2601		-0.313055	0.0250007	0.00357905
	ENSMUSG00000031848	LSM4 homolog, U6 small nuclear RNA and mRNA degradation associated [Source:MGI Symbol;Acc:MGI:1354692]	Lsm4	325.349	309.626	389.938	358.965	396.019	381.79		0.238896	0.0250614	0.00359103
	ENSMUSG00000096727	proteasome (prosome, macropain) subunit, beta type 9 (large multifunctional peptidase 2) [Source:MGI Symbol;Acc:MGI:1346526]	Psmb9	163.415	165.628	160.14	130.067	149.703	143.783		-0.173842	0.0250671	0.00359513
	ENSMUSG00000032968	inhibin alpha [Source:MGI Symbol;Acc:MGI:96569]	Inha	0.86846	0.411701	0.550748	2.33763	1.49987	1.78128		1.50059	0.0250808	0.00360037
	ENSMUSG00000052302	TBC1 domain family, member 30 [Source:MGI Symbol;Acc:MGI:1921944]	Tbc1d30	2.64626	2.48027	2.27732	1.25548	1.7837	1.78853		-0.536372	0.0250862	0.00360445
	ENSMUSG00000030614	transmembrane protein 126B [Source:MGI Symbol;Acc:MGI:1915722]	Tmem126b	20.9565	21.4591	18.5522	17.0593	18.8915	17.3219		-0.217744	0.025093	0.00360871
	ENSMUSG00000107254	predicted gene 43769 [Source:MGI Symbol;Acc:MGI:5663906]	Gm43769	3.07092	2.42314	1.59727	0.823323	1.75458	1.44345		-0.831393	0.0251167	0.00361541
	ENSMUSG00000069094	phosphodiesterase 7A [Source:MGI Symbol;Acc:MGI:1202402]	Pde7a	71.4527	70.4211	53.9044	63.0346	56.821	57.0545		-0.214589	0.0251214	0.00361938
	ENSMUSG00000040374	peroxisomal biogenesis factor 2 [Source:MGI Symbol;Acc:MGI:107486]	Pex2	46.5297	46.9489	43.8832	39.9335	40.7469	38.726		-0.215603	0.0251293	0.00362382
	ENSMUSG00000090841	myosin, light polypeptide 6, alkali, smooth muscle and non-muscle [Source:MGI Symbol;Acc:MGI:109318]	Myl6	626.805	637.079	642.593	467.204	595.032	539.953		-0.209995	0.0252728	0.00364782
	ENSMUSG00000051650	UDP-GlcNAc:betaGal beta-1,3-N-acetylglucosaminyltransferase 2 [Source:MGI Symbol;Acc:MGI:1889505]	B3gnt2	0.52933	0.399513	0.51015	0.957925	0.831694	0.838083		0.842209	0.025288	0.00365334
	ENSMUSG00000038256	B cell CLL/lymphoma 9 [Source:MGI Symbol;Acc:MGI:1924828]	Bcl9	2.53697	2.51647	2.32039	3.18691	2.91871	3.14969		0.341488	0.0253717	0.00366875
	ENSMUSG00000029465	actin related protein 2/3 complex, subunit 3 [Source:MGI Symbol;Acc:MGI:1928375]	Arpc3	416.564	438.625	436.508	331.583	397.095	365.88		-0.20323	0.0253934	0.00367854
	ENSMUSG00000037960	caspase recruitment domain family, member 19 [Source:MGI Symbol;Acc:MGI:1915730]	Card19	43.1276	42.8617	44.9627	46.3127	47.7168	55.6638		0.310638	0.0253934	0.00367668
	ENSMUSG00000017485	topoisomerase (DNA) II beta [Source:MGI Symbol;Acc:MGI:98791]	Top2b	167.574	160.635	130.584	156.148	135.403	133.178		-0.196767	0.0253987	0.00368264
	ENSMUSG00000032872	cytochrome b5 reductase 4 [Source:MGI Symbol;Acc:MGI:2386848]	Cyb5r4	51.311	51.3863	53.5911	43.2123	49.0456	44.2221		-0.181291	0.0254083	0.00369002
	ENSMUSG00000094568	SWI/SNF related, matrix associated, actin dependent regulator of chromatin, subfamily e, member 1, pseodogene 1 [Source:MGI Symbol;Acc:MGI:3037673]	Smarce1-ps1	2.70317	2.25537	1.88569	4.23422	3.81483	4.37085		0.840182	0.0254083	0.00369069
	ENSMUSG00000029816	glycoprotein (transmembrane) nmb [Source:MGI Symbol;Acc:MGI:1934765]	Gpnmb	0.464809	0.675872	0.701487	0.170749	0.598384	0.235285		-1.06057	0.0254564	0.00370661
	ENSMUSG00000025877	hexokinase 3 [Source:MGI Symbol;Acc:MGI:2670962]	Hk3	1.17022	0.907096	0.744621	0.604159	0.658067	0.445985		-0.955083	0.0254564	0.00370769
	ENSMUSG00000009687	FXYD domain-containing ion transport regulator 5 [Source:MGI Symbol;Acc:MGI:1201785]	Fxyd5	564.789	562.57	501.181	446.442	513.345	487.099		-0.165664	0.0254564	0.00370295
	ENSMUSG00000030588	Yip1 interacting factor homolog B (S. cerevisiae) [Source:MGI Symbol;Acc:MGI:1924504]	Yif1b	71.2556	65.3817	79.1195	70.9135	91.4355	84.897		0.281377	0.0254598	0.0037182
	ENSMUSG00000036305	ribosomal protein L39, pseudogene [Source:MGI Symbol;Acc:MGI:3705781]	Rpl39-ps	128.792	126.68	127.098	178.256	134.65	187.049		0.478867	0.0254598	0.003715
	ENSMUSG00000098973	microRNA 6236 [Source:MGI Symbol;Acc:MGI:5530929]	Mir6236	1255.42	1092.33	1411.71	2422.55	1422.63	2553.52		0.940765	0.0254598	0.003717
	ENSMUSG00000027540	protein tyrosine phosphatase, non-receptor type 1 [Source:MGI Symbol;Acc:MGI:97805]	Ptpn1	99.7413	92.6584	97.9655	116.513	101.159	112.561		0.224254	0.0255117	0.00372912
	ENSMUSG00000085129	RIKEN cDNA 5031425F14 gene [Source:MGI Symbol;Acc:MGI:2442533]	5031425F14Rik	0.166519	0.651255	0.096801	0.0530151	0.200854	0		-2.72352	0.0255269	0.00374263
	ENSMUSG00000037259	double zinc ribbon and ankyrin repeat domains 1 [Source:MGI Symbol;Acc:MGI:2139080]	Dzank1	0.267804	0.202126	0.147486	0.148086	0.165762	0.0662518		-1.26112	0.0255269	0.00373566
	ENSMUSG00000062232	Rap guanine nucleotide exchange factor (GEF) 2 [Source:MGI Symbol;Acc:MGI:2659071]	Rapgef2	10.1112	11.0531	8.54211	8.88159	8.41974	8.49244		-0.23297	0.0255269	0.00374741
	ENSMUSG00000002372	RAN binding protein 3 [Source:MGI Symbol;Acc:MGI:1919060]	Ranbp3	52.6044	53.3969	54.5362	60.8545	55.4893	60.0223		0.179143	0.0255269	0.00374809
	ENSMUSG00000028385	sorting nexin family member 30 [Source:MGI Symbol;Acc:MGI:2443882]	Snx30	3.66015	4.57684	4.25978	9.31756	4.45989	5.8143		0.553032	0.0255269	0.00373927
	ENSMUSG00000023960	ectonucleotide pyrophosphatase/phosphodiesterase 5 [Source:MGI Symbol;Acc:MGI:1933830]	Enpp5	3.49981	3.71881	2.86364	2.19796	1.99506	2.52391		-0.515429	0.0255319	0.00375216
	ENSMUSG00000024797	VPS51 GARP complex subunit [Source:MGI Symbol;Acc:MGI:1915755]	Vps51	21.6416	16.6929	19.3204	24.4106	22.3981	23.227		0.289802	0.025544	0.00375728
	ENSMUSG00000021188	thyroid hormone receptor interactor 11 [Source:MGI Symbol;Acc:MGI:1924393]	Trip11	32.1363	31.6792	29.4328	28.5132	28.5218	27.3525		-0.164305	0.0255788	0.00376577
	ENSMUSG00000020520	polypeptide N-acetylgalactosaminyltransferase 10 [Source:MGI Symbol;Acc:MGI:1890480]	Galnt10	48.6504	47.975	39.426	28.7527	39.8256	39.1282		-0.287896	0.0256438	0.00377869
	ENSMUSG00000024146	cysteine-rich PDZ-binding protein [Source:MGI Symbol;Acc:MGI:1929655]	Cript	95.1619	101.89	105.874	77.1823	86.8874	82.1699		-0.249786	0.0256688	0.00378592
	ENSMUSG00000039159	ubiquitin-conjugating enzyme E2H [Source:MGI Symbol;Acc:MGI:104632]	Ube2h	92.0657	92.7405	69.4027	90.2138	69.2916	72.6242		-0.233598	0.0256688	0.0037891
	ENSMUSG00000026782	abl interactor 2 [Source:MGI Symbol;Acc:MGI:106913]	Abi2	14.9945	15.1051	13.3483	11.0796	12.5041	12.302		-0.255063	0.0256739	0.00379323
	ENSMUSG00000086859	small nucleolar RNA host gene 20 [Source:MGI Symbol;Acc:MGI:1924222]	Snhg20	9.16621	7.38706	9.08267	13.9281	8.0283	12.5729		0.497358	0.0256805	0.00379757
	ENSMUSG00000039087	ras responsive element binding protein 1 [Source:MGI Symbol;Acc:MGI:2443664]	Rreb1	9.46166	8.7114	9.00503	11.2784	9.61336	10.8505		0.252961	0.0257293	0.00380815
	ENSMUSG00000082420	predicted gene 6517 [Source:MGI Symbol;Acc:MGI:3643656]	Gm6517	3.87415	2.67384	3.37818	1.95897	2.47392	1.07118		-1.22072	0.025756	0.00381548
	ENSMUSG00000040738	integrator complex subunit 8 [Source:MGI Symbol;Acc:MGI:1919906]	Ints8	32.464	31.3911	27.411	27.7618	27.8738	27.1928		-0.165854	0.0257884	0.00382367
	ENSMUSG00000018800	ATP-binding cassette, sub-family A (ABC1), member 5 [Source:MGI Symbol;Acc:MGI:2386607]	Abca5	0.152731	0.13274	0.221964	0.0875257	0.0644781	0.0574318		-1.2427	0.0258349	0.00383394
	ENSMUSG00000023008	formin-like 3 [Source:MGI Symbol;Acc:MGI:109569]	Fmnl3	59.1888	54.5759	56.2427	63.5544	56.608	66.3694		0.198038	0.0259387	0.00385276
	ENSMUSG00000040724	potassium voltage-gated channel, shaker-related subfamily, member 2 [Source:MGI Symbol;Acc:MGI:96659]	Kcna2	0.273868	0.280525	0.196163	0.23355	0.150421	0.0827542		-1.26249	0.0259544	0.0038708
	ENSMUSG00000049439	cytochrome P450, family 20, subfamily a, polypeptide 1 [Source:MGI Symbol;Acc:MGI:1925201]	Cyp20a1	37.2893	40.4441	37.0907	28.9985	37.5584	29.8828		-0.288152	0.0259544	0.00387395
	ENSMUSG00000022639	Dppa2 upstream binding RNA [Source:MGI Symbol;Acc:MGI:1915440]	Dubr	21.8271	20.733	19.4451	19.4924	18.7776	16.6587		-0.254206	0.0259544	0.00388231
	ENSMUSG00000033294	NOC4 like [Source:MGI Symbol;Acc:MGI:2140843]	Noc4l	103.264	106.434	110.775	107.755	118.78	119.216		0.177107	0.0259544	0.00388112
	ENSMUSG00000033088	TRIO and F-actin binding protein [Source:MGI Symbol;Acc:MGI:1349410]	Triobp	17.3798	15.8084	17.6064	18.0464	18.814	19.4797		0.214097	0.0259544	0.0038617
	ENSMUSG00000024792	zinc finger like protein 1 [Source:MGI Symbol;Acc:MGI:1891017]	Zfpl1	23.5479	24.3239	25.9751	29.3734	27.0645	29.5158		0.283271	0.0259544	0.00386764
	ENSMUSG00000044328	transformation related protein 53 inducible protein 13 [Source:MGI Symbol;Acc:MGI:1915125]	Trp53i13	33.5807	28.5049	29.7053	38.1581	34.5299	38.0141		0.29337	0.0259544	0.00387446
	ENSMUSG00000072573	predicted gene 10369 [Source:MGI Symbol;Acc:MGI:3642774]	Gm10369	0.608637	1.19019	1.06144	2.1315	1.46826	2.38403		1.29323	0.0259544	0.00388086
	ENSMUSG00000034390	c-Maf inducing protein [Source:MGI Symbol;Acc:MGI:1921690]	Cmip	39.5526	41.0683	38.6009	45.826	40.3388	45.1214		0.171585	0.0259556	0.00388907
	ENSMUSG00000033589	receptor accessory protein 4 [Source:MGI Symbol;Acc:MGI:1919799]	Reep4	116.11	112.536	110.985	113.893	120.683	131.627		0.183467	0.0259556	0.00388929
	ENSMUSG00000027430	D-tyrosyl-tRNA deacylase 1 [Source:MGI Symbol;Acc:MGI:1913294]	Dtd1	26.9726	28.0016	29.7339	34.4596	30.5791	32.4748		0.241442	0.0260792	0.00392212
	ENSMUSG00000041354	ral guanine nucleotide dissociation stimulator-like 2 [Source:MGI Symbol;Acc:MGI:107483]	Rgl2	29.4845	30.2973	26.3027	39.1034	27.5841	36.8071		0.293145	0.0260792	0.00392262
	ENSMUSG00000042659	arrestin domain containing 4 [Source:MGI Symbol;Acc:MGI:1913662]	Arrdc4	3.05619	3.19492	2.33811	4.90175	4.04282	3.95724		0.47819	0.0260792	0.00392029
	ENSMUSG00000073079	signal recognition particle 54A [Source:MGI Symbol;Acc:MGI:1346087]	Srp54a	1.39962	1.14039	1.25858	2.06786	1.50356	1.97363		0.585119	0.0260792	0.00392001
	ENSMUSG00000039556	protein phosphatase 1, regulatory subunit 3F [Source:MGI Symbol;Acc:MGI:1859617]	Ppp1r3f	0.587573	0.61869	0.512352	1.1224	0.797316	1.08349		0.824579	0.0260792	0.00392491
	ENSMUSG00000074203	RIKEN cDNA G430095P16 gene [Source:MGI Symbol;Acc:MGI:3588227]	G430095P16Rik	11.3061	11.1598	13.6613	26.3795	17.972	18.2205		0.729014	0.0261044	0.00393211
	ENSMUSG00000051695	poly(rC) binding protein 1 [Source:MGI Symbol;Acc:MGI:1345635]	Pcbp1	502.082	434.954	515.656	498.328	568.879	553.893		0.231563	0.0262288	0.0039543
	ENSMUSG00000031154	OTU domain containing 5 [Source:MGI Symbol;Acc:MGI:1859615]	Otud5	85.6374	89.5416	80.6105	111.012	89.9712	97.285		0.198487	0.0262376	0.00395906
	ENSMUSG00000025489	interferon induced transmembrane protein 5 [Source:MGI Symbol;Acc:MGI:1934923]	Ifitm5	0.152226	0.198451	0.265475	0	0	0		-1.90009	0.0263725	0.00399109
	ENSMUSG00000021998	lymphocyte cytosolic protein 1 [Source:MGI Symbol;Acc:MGI:104808]	Lcp1	1051.11	998.01	952.404	827.206	971.232	889.124		-0.157697	0.0263725	0.00398861
	ENSMUSG00000047030	spermatogenesis associated 2 [Source:MGI Symbol;Acc:MGI:2146885]	Spata2	30.2622	30.4976	29.3375	34.0583	32.6322	34.1774		0.188266	0.0263725	0.00399324
	ENSMUSG00000099764	ribosomal protein S10, pseudogene 2 [Source:MGI Symbol;Acc:MGI:3645627]	Rps10-ps2	19.0175	17.1404	26.4097	32.9641	22.7263	29.1344		0.56685	0.0263725	0.00398534
	ENSMUSG00000034902	phosphatidylinositol-4-phosphate 5-kinase, type 1 gamma [Source:MGI Symbol;Acc:MGI:1298224]	Pip5k1c	75.3182	67.0582	69.8227	83.7396	74.6077	80.5297		0.191592	0.0264091	0.00400226
	ENSMUSG00000006498	polypyrimidine tract binding protein 1 [Source:MGI Symbol;Acc:MGI:97791]	Ptbp1	505.144	471.587	479.057	504.036	533.029	534.208		0.145057	0.0264605	0.00401351
	ENSMUSG00000055093	ribosomal protein S27A, pseudogene 3 [Source:MGI Symbol;Acc:MGI:3645406]	Rps27a-ps3	42.5262	44.8031	39.0223	64.7046	36.0107	74.8425		0.618962	0.0265876	0.00403976
	ENSMUSG00000053291	RAB4B, member RAS oncogene family [Source:MGI Symbol;Acc:MGI:105071]	Rab4b	1.77339	1.38714	3.8659	3.44405	3.26204	3.50096		0.907495	0.0265876	0.00403897
	ENSMUSG00000003541	immediate early response 3 [Source:MGI Symbol;Acc:MGI:104814]	Ier3	26.4618	21.8796	21.7274	13.768	21.051	15.8743		-0.521887	0.0266585	0.00405403
	ENSMUSG00000021468	serine palmitoyltransferase, long chain base subunit 1 [Source:MGI Symbol;Acc:MGI:1099431]	Sptlc1	74.0436	74.0716	68.7051	58.3654	70.6862	60.8637		-0.21423	0.0267359	0.00407631
	ENSMUSG00000029840	myotrophin [Source:MGI Symbol;Acc:MGI:99445]	Mtpn	420.17	387.818	384.868	331.851	373.799	354.493		-0.154497	0.0267359	0.00407258
	ENSMUSG00000022018	regulator of cell cycle [Source:MGI Symbol;Acc:MGI:1913464]	Rgcc	15.4763	18.0259	26.4369	26.5342	23.4107	26.2357		0.543024	0.0267359	0.00407375
	ENSMUSG00000028719	cytidine monophosphate (UMP-CMP) kinase 1 [Source:MGI Symbol;Acc:MGI:1913838]	Cmpk1	137.938	131.262	138.154	107.518	126.202	114.436		-0.205481	0.026749	0.00408855
	ENSMUSG00000022035	coiled-coil domain containing 25 [Source:MGI Symbol;Acc:MGI:1914429]	Ccdc25	52.7687	55.1519	51.2801	43.1548	50.8992	46.2087		-0.176225	0.026749	0.00408547
	ENSMUSG00000040669	polyhomeotic 1 [Source:MGI Symbol;Acc:MGI:103248]	Phc1	15.4552	15.534	13.6108	18.2472	15.5327	17.9599		0.232639	0.026749	0.00409188
	ENSMUSG00000097035	predicted gene, 26692 [Source:MGI Symbol;Acc:MGI:5477186]	Gm26692	1.3541	1.32397	1.91871	3.39497	2.44995	3.1824		1.07476	0.026749	0.00409234
	ENSMUSG00000062939	signal transducer and activator of transcription 4 [Source:MGI Symbol;Acc:MGI:103062]	Stat4	87.9108	97.3544	73.1685	76.6688	78.358	74.359		-0.218332	0.0267851	0.00410942
	ENSMUSG00000021326	tripartite motif-containing 27 [Source:MGI Symbol;Acc:MGI:97904]	Trim27	58.2051	58.4349	61.2219	67.3421	61.8297	64.6895		0.157231	0.0267851	0.00411847
	ENSMUSG00000027351	sprouty protein with EVH-1 domain 1, related sequence [Source:MGI Symbol;Acc:MGI:2150016]	Spred1	4.42877	5.34843	4.90957	7.62382	5.32641	6.43873		0.419488	0.0267851	0.00410244
	ENSMUSG00000087412	predicted pseudogene 15501 [Source:MGI Symbol;Acc:MGI:3704296]	Gm15501	22.495	29.5047	24.8777	42.9706	28.9117	35.0731		0.482385	0.0267851	0.00411809
	ENSMUSG00000068740	cadherin, EGF LAG seven-pass G-type receptor 2 [Source:MGI Symbol;Acc:MGI:1858235]	Celsr2	0.697926	0.672506	0.705597	1.21727	0.78693	0.998422		0.52663	0.0267851	0.00411893
	ENSMUSG00000036158	prickle planar cell polarity protein 1 [Source:MGI Symbol;Acc:MGI:1916034]	Prickle1	0.670038	0.803623	0.724481	2.09908	1.52748	1.15899		0.859393	0.0267851	0.00411152
	ENSMUSG00000066878	predicted pseudogene 10184 [Source:MGI Symbol;Acc:MGI:3704480]	Gm10184	2.87031	1.98551	2.24746	1.73441	2.11968	0.991218		-0.952303	0.0267965	0.0041242
	ENSMUSG00000034563	cell cycle progression 1 [Source:MGI Symbol;Acc:MGI:1196419]	Ccpg1	1.58439	1.64026	1.09712	1.4836	0.927433	0.949159		-0.56783	0.0268867	0.00415907
	ENSMUSG00000042759	apolipoprotein B receptor [Source:MGI Symbol;Acc:MGI:2176230]	Apobr	36.0544	42.664	32.621	23.6638	31.1946	29.9252		-0.347898	0.0268867	0.00415221
	ENSMUSG00000037470	UDP-glucose glycoprotein glucosyltransferase 1 [Source:MGI Symbol;Acc:MGI:2443162]	Uggt1	76.9676	73.5746	62.8558	61.5882	68.7675	63.9404		-0.163051	0.0268867	0.00415486
	ENSMUSG00000037020	WD repeat domain 62 [Source:MGI Symbol;Acc:MGI:1923696]	Wdr62	22.7511	20.8835	19.98	23.5892	23.2598	25.2956		0.218462	0.0268867	0.00415134
	ENSMUSG00000028861	mitochondrial ribosomal protein S15 [Source:MGI Symbol;Acc:MGI:1913657]	Mrps15	91.2085	79.0011	94.2868	88.2973	94.4585	105.724		0.245287	0.0268867	0.00414738
	ENSMUSG00000083337	predicted gene 11539 [Source:MGI Symbol;Acc:MGI:3651911]	Gm11539	18.6073	24.2577	18.5952	30.9515	22.6961	34.9847		0.65926	0.0268867	0.00415922
	ENSMUSG00000098715	predicted gene, 28053 [Source:MGI Symbol;Acc:MGI:5547789]	Gm28053	15.7782	17.6529	14.0663	15.9697	13.8476	9.51953		-0.548179	0.0269445	0.00417396
	ENSMUSG00000049717	ligase IV, DNA, ATP-dependent [Source:MGI Symbol;Acc:MGI:1335098]	Lig4	5.41744	5.72005	4.9191	4.16936	5.18437	3.85118		-0.385998	0.0269445	0.00417657
	ENSMUSG00000023845	leucyl/cystinyl aminopeptidase [Source:MGI Symbol;Acc:MGI:2387123]	Lnpep	166.264	139.343	128.301	129.808	139.58	121.828		-0.219163	0.0269445	0.00419245
	ENSMUSG00000026393	NIMA (never in mitosis gene a)-related expressed kinase 7 [Source:MGI Symbol;Acc:MGI:1890645]	Nek7	135.461	128.063	110.685	122.083	113.632	110.573		-0.168312	0.0269445	0.00419015
	ENSMUSG00000007036	abhydrolase domain containing 16A [Source:MGI Symbol;Acc:MGI:99476]	Abhd16a	52.3675	49.7406	53.8626	56.7182	60.8204	57.3211		0.186992	0.0269445	0.00418953
	ENSMUSG00000027327	RIKEN cDNA 1700037H04 gene [Source:MGI Symbol;Acc:MGI:1914576]	1700037H04Rik	23.9426	25.8338	22.521	25.8846	30.4615	31.8942		0.360269	0.0269445	0.00418695
	ENSMUSG00000096900	T cell receptor alpha variable 9-1 [Source:MGI Symbol;Acc:MGI:3650356]	Trav9-1	4.38891	1.90722	4.84759	5.86869	6.35264	8.25185		1.17927	0.0269445	0.0041929
	ENSMUSG00000041124	Myb/SANT-like DNA-binding domain containing 4 with coiled-coils [Source:MGI Symbol;Acc:MGI:1925350]	Msantd4	24.6588	26.3642	21.5893	22.1638	22.7154	20.1186		-0.228512	0.0271165	0.00422322
	ENSMUSG00000045886	predicted gene 9803 [Source:MGI Symbol;Acc:MGI:3704359]	Gm9803	1.86159	2.15723	2.8858	0.395118	1.12271	0.583346		-1.60374	0.0271563	0.0042401
	ENSMUSG00000020888	dishevelled segment polarity protein 2 [Source:MGI Symbol;Acc:MGI:106613]	Dvl2	16.2531	15.4997	15.3493	20.0446	17.045	18.0777		0.218463	0.0271563	0.00423694
	ENSMUSG00000030605	milk fat globule EGF and factor V/VIII domain containing [Source:MGI Symbol;Acc:MGI:102768]	Mfge8	16.473	15.4596	14.5805	19.6671	17.9545	18.308		0.24514	0.0271563	0.00423995
	ENSMUSG00000027247	Rho GTPase activating protein 1 [Source:MGI Symbol;Acc:MGI:2445003]	Arhgap1	165.676	160.835	140.76	140.105	141.893	142.97		-0.142491	0.0271581	0.00424393
	ENSMUSG00000003037	RAB8A, member RAS oncogene family [Source:MGI Symbol;Acc:MGI:96960]	Rab8a	160.838	166.873	153.749	138.545	150.635	141.535		-0.162485	0.027215	0.0042564
	ENSMUSG00000042492	TBC1 domain family, member 10b [Source:MGI Symbol;Acc:MGI:1915699]	Tbc1d10b	69.8566	63.4286	61.8866	72.2162	71.8995	72.781		0.159541	0.0273033	0.00427379
	ENSMUSG00000048546	transducer of ERBB2, 2 [Source:MGI Symbol;Acc:MGI:1888525]	Tob2	28.9733	26.153	25.8889	36.619	28.2498	30.6378		0.197826	0.0273117	0.00427868
	ENSMUSG00000060429	syntrophin, basic 1 [Source:MGI Symbol;Acc:MGI:101781]	Sntb1	13.1676	13.4021	10.719	11.0724	9.47815	10.0962		-0.319937	0.0274053	0.00430247
	ENSMUSG00000041439	major facilitator superfamily domain containing 6 [Source:MGI Symbol;Acc:MGI:1922925]	Mfsd6	28.5649	30.4699	21.355	22.6073	22.7949	23.0228		-0.264374	0.0274053	0.00430442
	ENSMUSG00000035000	dipeptidylpeptidase 4 [Source:MGI Symbol;Acc:MGI:94919]	Dpp4	94.0061	90.5988	76.2023	80.0353	79.3235	77.6318		-0.174953	0.0274053	0.00430771
	ENSMUSG00000063696	predicted pseudogene 8730 [Source:MGI Symbol;Acc:MGI:3644565]	Gm8730	22.4604	28.0078	31.5064	37.6582	33.3491	32.7047		0.394343	0.0274053	0.00430451
	ENSMUSG00000028656	CAP, adenylate cyclase-associated protein 1 (yeast) [Source:MGI Symbol;Acc:MGI:88262]	Cap1	975.048	965.332	916.397	768.966	871.487	859.316		-0.156908	0.0275142	0.00433785
	ENSMUSG00000028277	ubiquitin-conjugating enzyme E2J 1 [Source:MGI Symbol;Acc:MGI:1926245]	Ube2j1	156.799	149.966	140.609	131.99	135.699	135.587		-0.141682	0.0275142	0.00432895
	ENSMUSG00000022556	heat shock factor 1 [Source:MGI Symbol;Acc:MGI:96238]	Hsf1	21.8502	21.1929	20.798	26.2436	22.4823	24.0724		0.18867	0.0275142	0.00433615
	ENSMUSG00000024050	widely-interspaced zinc finger motifs [Source:MGI Symbol;Acc:MGI:1332638]	Wiz	30.5937	28.0074	31.1379	34.1187	33.5011	33.2617		0.19537	0.0275142	0.00434198
	ENSMUSG00000031796	cilia and flagella associated protein 20 [Source:MGI Symbol;Acc:MGI:107428]	Cfap20	24.3056	25.1717	25.2777	27.8127	28.047	28.0143		0.197249	0.0275142	0.00434286
	ENSMUSG00000016503	general transcription factor III A [Source:MGI Symbol;Acc:MGI:1913846]	Gtf3a	106.443	111.001	116.728	122.794	123.664	123.352		0.189985	0.0275482	0.00435184
	ENSMUSG00000070733	FRY like transcription coactivator [Source:MGI Symbol;Acc:MGI:1919563]	Fryl	70.7898	65.1249	56.9816	55.5543	65.0935	54.7445		-0.206201	0.0276008	0.00436772
	ENSMUSG00000042410	alkylglycerone phosphate synthase [Source:MGI Symbol;Acc:MGI:2443065]	Agps	67.1571	62.8788	61.6207	52.3012	60.0487	55.8935		-0.178971	0.0276008	0.00437881
	ENSMUSG00000071660	tetratricopeptide repeat domain 9C [Source:MGI Symbol;Acc:MGI:1917637]	Ttc9c	67.8137	66.6476	59.438	59.326	60.4481	57.2378		-0.162507	0.0276008	0.00437335
	ENSMUSG00000000532	activin A receptor, type 1B [Source:MGI Symbol;Acc:MGI:1338944]	Acvr1b	16.2369	17.8343	16.5256	21.4999	16.6678	20.319		0.251572	0.0276008	0.00438186
	ENSMUSG00000023938	alanyl-tRNA synthetase 2, mitochondrial [Source:MGI Symbol;Acc:MGI:2681839]	Aars2	12.7817	10.3865	9.95197	15.7093	11.2975	15.0255		0.361483	0.0276008	0.00436761
	ENSMUSG00000029470	purinergic receptor P2X, ligand-gated ion channel 4 [Source:MGI Symbol;Acc:MGI:1338859]	P2rx4	1.42561	1.8153	1.83575	2.81825	1.84453	2.35312		0.524516	0.0276008	0.00437808
	ENSMUSG00000075700	selenoprotein T [Source:MGI Symbol;Acc:MGI:1916477]	Selenot	275.439	258.165	241.3	227.08	242.828	232.777		-0.146932	0.0276645	0.00439561
	ENSMUSG00000021895	Rho guanine nucleotide exchange factor (GEF) 3 [Source:MGI Symbol;Acc:MGI:1918954]	Arhgef3	227.786	218.181	191.738	219.012	183.166	186.738		-0.17682	0.0277141	0.00440712
	ENSMUSG00000096433	zinc finger protein 994 [Source:MGI Symbol;Acc:MGI:3643318]	Zfp994	8.75422	9.60893	7.98709	6.99433	8.11365	6.74966		-0.327189	0.0277322	0.00441684
	ENSMUSG00000039531	zinc finger containing ubiquitin peptidase 1 [Source:MGI Symbol;Acc:MGI:1919830]	Zup1	11.0265	11.1619	9.9507	10.8749	9.03447	8.95394		-0.223054	0.0277322	0.00441857
	ENSMUSG00000098234	small nucleolar RNA host gene 6 [Source:MGI Symbol;Acc:MGI:1921074]	Snhg6	60.0554	64.6472	73.2784	81.9149	66.0953	77.4728		0.272062	0.0277322	0.0044209
	ENSMUSG00000035027	mitogen-activated protein kinase kinase 2 [Source:MGI Symbol;Acc:MGI:1346867]	Map2k2	63.8505	58.3078	60.7149	64.1861	66.8586	70.7148		0.201844	0.0278191	0.00444569
	ENSMUSG00000028458	testis specific protein kinase 1 [Source:MGI Symbol;Acc:MGI:1201675]	Tesk1	20.5644	18.352	21.7791	23.2536	22.6187	23.3319		0.242607	0.0278191	0.00444422
	ENSMUSG00000104649	predicted gene 43712 [Source:MGI Symbol;Acc:MGI:5663849]	Gm43712	40.4182	57.3871	47.806	67.2705	47.7867	80.8833		0.62911	0.0278191	0.00444219
	ENSMUSG00000031995	suppression of tumorigenicity 14 (colon carcinoma) [Source:MGI Symbol;Acc:MGI:1338881]	St14	11.0246	9.60149	10.6238	14.9427	12.1529	12.0555		0.274087	0.0280368	0.00448416
	ENSMUSG00000034218	ataxia telangiectasia mutated [Source:MGI Symbol;Acc:MGI:107202]	Atm	46.759	43.233	39.8397	40.1738	43.1867	36.2056		-0.203004	0.0280682	0.00449603
	ENSMUSG00000031508	ankyrin repeat domain 10 [Source:MGI Symbol;Acc:MGI:1921840]	Ankrd10	47.9053	48.4097	50.8128	62.6498	48.554	56.4907		0.222468	0.0280682	0.00449655
	ENSMUSG00000026433	RAB29, member RAS oncogene family [Source:MGI Symbol;Acc:MGI:2385107]	Rab29	46.5651	46.227	39.6354	35.3831	39.2543	38.0327		-0.232558	0.0282197	0.00452565
	ENSMUSG00000031659	adenylate cyclase 7 [Source:MGI Symbol;Acc:MGI:102891]	Adcy7	197.777	188.252	146.306	158.752	161.816	154.383		-0.223478	0.0282197	0.00453192
	ENSMUSG00000026946	N-myc (and STAT) interactor [Source:MGI Symbol;Acc:MGI:1928368]	Nmi	117.209	131.254	114.231	103.777	115.035	103.621		-0.18732	0.0282197	0.00453097
	ENSMUSG00000004270	lysophosphatidylcholine acyltransferase 3 [Source:MGI Symbol;Acc:MGI:1315211]	Lpcat3	53.3444	50.5895	48.4106	34.5113	52.4806	40.8687		-0.278779	0.0284326	0.00457502
	ENSMUSG00000029407	USO1 vesicle docking factor [Source:MGI Symbol;Acc:MGI:1929095]	Uso1	90.7999	90.7721	75.5981	74.0554	77.529	76.1098		-0.192041	0.0284326	0.00457862
	ENSMUSG00000055612	cell division cycle associated 7 [Source:MGI Symbol;Acc:MGI:1914203]	Cdca7	132.091	127.872	138.077	161.767	146.901	145.1		0.189807	0.0284326	0.004581
	ENSMUSG00000036882	Rho GTPase activating protein 33 [Source:MGI Symbol;Acc:MGI:2673998]	Arhgap33	21.2565	19.5743	18.9349	24.4088	21.1446	25.7068		0.309936	0.0284326	0.00457581
	ENSMUSG00000054716	zinc finger protein 771 [Source:MGI Symbol;Acc:MGI:2442050]	Zfp771	2.60844	3.2494	5.05446	4.92737	6.03037	5.12225		0.744414	0.0286004	0.0046118
	ENSMUSG00000023079	general transcription factor II I repeat domain-containing 1 [Source:MGI Symbol;Acc:MGI:1861942]	Gtf2ird1	1.57949	1.45937	1.40402	2.02122	1.92828	1.97498		0.40972	0.0286224	0.0046191
	ENSMUSG00000044034	neuropeptide B [Source:MGI Symbol;Acc:MGI:2387153]	Npb	2.57828	1.1204	2.06086	3.69384	3.1099	5.65551		1.36309	0.0288198	0.00465473
	ENSMUSG00000034259	exosome component 4 [Source:MGI Symbol;Acc:MGI:1923576]	Exosc4	51.8498	50.4228	60.5089	62.904	65.3211	59.9437		0.239324	0.0288375	0.00466515
	ENSMUSG00000027660	SKI-like [Source:MGI Symbol;Acc:MGI:106203]	Skil	59.2233	63.6451	62.2422	81.5433	56.0428	76.3521		0.271622	0.0288375	0.0046622
	ENSMUSG00000033722	cDNA sequence BC034090 [Source:MGI Symbol;Acc:MGI:2672904]	BC034090	0.0424906	0.0553934	0.0247006	0.0811669	0.0896905	0.186408		1.63151	0.02898	0.004692
	ENSMUSG00000054702	adaptor-related protein complex AP-1, sigma 3 [Source:MGI Symbol;Acc:MGI:1891304]	Ap1s3	50.9834	47.3696	43.2216	36.3281	40.448	42.0324		-0.213528	0.0290829	0.00471629
	ENSMUSG00000039841	zinc finger protein 800 [Source:MGI Symbol;Acc:MGI:1889334]	Zfp800	35.0973	34.8505	31.9283	33.3608	30.0278	29.7537		-0.167232	0.0290829	0.00471391
	ENSMUSG00000020741	clustered mitochondria (cluA/CLU1) homolog [Source:MGI Symbol;Acc:MGI:1921398]	Cluh	75.8141	71.728	78.571	84.3516	85.9375	80.4475		0.157516	0.0291361	0.00472874
	ENSMUSG00000020766	galactokinase 1 [Source:MGI Symbol;Acc:MGI:95730]	Galk1	123.824	102.578	159.466	139.388	168.811	148.406		0.348851	0.0291998	0.0047429
	ENSMUSG00000078202	Notch-regulated ankyrin repeat protein [Source:MGI Symbol;Acc:MGI:1914372]	Nrarp	26.2492	29.9867	35.1197	32.7819	30.1111	40.6184		0.396437	0.0292955	0.00476228
	ENSMUSG00000028931	potassium voltage-gated channel, shaker-related subfamily, beta member 2 [Source:MGI Symbol;Acc:MGI:109239]	Kcnab2	201.009	182.931	186.948	199.129	210.213	211.151		0.154102	0.02938	0.00478372
	ENSMUSG00000048271	RNA binding motif protein 33 [Source:MGI Symbol;Acc:MGI:1919670]	Rbm33	29.8723	32.6289	29.5406	46.8497	29.7371	36.6812		0.262651	0.02938	0.004783
	ENSMUSG00000030199	ets variant 6 [Source:MGI Symbol;Acc:MGI:109336]	Etv6	22.0526	21.1622	19.2124	19.873	19.9145	17.5474		-0.198556	0.0293905	0.00478929
	ENSMUSG00000020802	ubiquitin-conjugating enzyme E2O [Source:MGI Symbol;Acc:MGI:2444266]	Ube2o	36.7107	35.9728	38.6936	38.0498	39.7047	42.5021		0.195533	0.0294078	0.00479596
	ENSMUSG00000041362	shootin 1 [Source:MGI Symbol;Acc:MGI:1918903]	Shtn1	0.415093	0.344363	0.279691	0.144168	0.341374	0.124161		-1.19854	0.0294508	0.00482698
	ENSMUSG00000031683	LSM6 homolog, U6 small nuclear RNA and mRNA degradation associated [Source:MGI Symbol;Acc:MGI:1925901]	Lsm6	84.4538	84.5485	84.9025	70.9487	81.3112	72.1952		-0.179488	0.0294508	0.00482636
	ENSMUSG00000048758	ribosomal protein L29 [Source:MGI Symbol;Acc:MGI:99687]	Rpl29	1165.77	1113.94	1160.27	1254.7	1174.08	1257.79		0.143225	0.0294508	0.00481266
	ENSMUSG00000000740	ribosomal protein L13 [Source:MGI Symbol;Acc:MGI:105922]	Rpl13	537.701	529.1	638.222	686.556	625.633	609.598		0.204423	0.0294508	0.00482301
	ENSMUSG00000064023	kallikrein related-peptidase 8 [Source:MGI Symbol;Acc:MGI:1343327]	Klk8	114.638	125.099	125.941	155.138	132.985	135.635		0.213794	0.0294508	0.00481264
	ENSMUSG00000028093	acid phosphatase 6, lysophosphatidic [Source:MGI Symbol;Acc:MGI:1931010]	Acp6	5.7384	6.19543	5.36203	7.94002	5.69917	7.3129		0.299665	0.0294508	0.0048291
	ENSMUSG00000107176	predicted pseudogene 9794 [Source:MGI Symbol;Acc:MGI:3642653]	Gm9794	130.218	157.198	151.476	172.755	143.702	199.798		0.393822	0.0294508	0.00483
	ENSMUSG00000004937	small glutamine-rich tetratricopeptide repeat (TPR)-containing, alpha [Source:MGI Symbol;Acc:MGI:1098703]	Sgta	77.581	77.755	78.3825	87.016	85.5311	86.3692		0.172232	0.0294859	0.00483962
	ENSMUSG00000021038	VPS33B interacting protein, apical-basolateral polarity regulator, spe-39 homolog [Source:MGI Symbol;Acc:MGI:2144805]	Vipas39	41.3343	42.2673	33.9255	35.3219	35.1963	34.1256		-0.206682	0.0294976	0.00485576
	ENSMUSG00000008333	U2 small nuclear ribonucleoprotein B [Source:MGI Symbol;Acc:MGI:104805]	Snrpb2	117.349	117.541	116.436	99.1571	114.198	100.968		-0.16658	0.0294976	0.00486124
	ENSMUSG00000039361	phosphatidylinositol binding clathrin assembly protein [Source:MGI Symbol;Acc:MGI:2385902]	Picalm	76.9022	73.6397	65.6048	66.1755	67.607	65.9617		-0.131828	0.0294976	0.00486475
	ENSMUSG00000000441	v-raf-leukemia viral oncogene 1 [Source:MGI Symbol;Acc:MGI:97847]	Raf1	69.191	71.2388	67.3797	82.0259	69.288	77.072		0.151983	0.0294976	0.00486292
	ENSMUSG00000035754	WD repeat domain 18 [Source:MGI Symbol;Acc:MGI:2158400]	Wdr18	37.1756	35.2676	37.0835	39.3041	40.5252	40.563		0.172047	0.0294976	0.00486028
	ENSMUSG00000037362	cellular communication network factor 3 [Source:MGI Symbol;Acc:MGI:109185]	Ccn3	6.00731	4.0745	5.45061	40.1638	12.4846	10.3407		1.32229	0.0294976	0.00485713
	ENSMUSG00000026102	inositol polyphosphate-1-phosphatase [Source:MGI Symbol;Acc:MGI:104848]	Inpp1	33.2052	34.2876	27.2409	29.5626	26.337	28.199		-0.194348	0.0295171	0.00488084
	ENSMUSG00000026083	eukaryotic translation initiation factor 5B [Source:MGI Symbol;Acc:MGI:2441772]	Eif5b	74.3037	72.6619	69.2475	66.2131	68.2877	63.8686		-0.14412	0.0295171	0.00488484
	ENSMUSG00000040681	high mobility group nucleosomal binding domain 1 [Source:MGI Symbol;Acc:MGI:96120]	Hmgn1	64.2098	63.8179	67.4334	84.8092	61.979	77.3561		0.244734	0.0295171	0.00487589
	ENSMUSG00000100199	predicted gene, 20324 [Source:MGI Symbol;Acc:MGI:5012509]	Gm20324	29.7902	31.0962	31.3352	41.2868	32.0378	41.0285		0.386717	0.0295171	0.00487699
	ENSMUSG00000105703	predicted gene 43305 [Source:MGI Symbol;Acc:MGI:5663442]	Gm43305	29.5428	20.1653	31.6338	37.5337	64.7972	39.9776		0.758245	0.0295171	0.00488731
	ENSMUSG00000038208	post-GPI attachment to proteins 3 [Source:MGI Symbol;Acc:MGI:2444461]	Pgap3	16.6719	15.0506	14.3813	17.4989	18.6175	18.6053		0.25834	0.0295868	0.00490272
	ENSMUSG00000050668	G patch domain containing 11 [Source:MGI Symbol;Acc:MGI:1858435]	Gpatch11	12.876	12.1383	10.6488	9.76236	10.0356	10.1613		-0.252988	0.0296845	0.0049228
	ENSMUSG00000028849	MAP7 domain containing 1 [Source:MGI Symbol;Acc:MGI:2384297]	Map7d1	97.3839	89.8751	104.213	100.597	111.579	107.976		0.197624	0.0296988	0.00492908
	ENSMUSG00000026667	U2AF homology motif (UHM) kinase 1 [Source:MGI Symbol;Acc:MGI:1341908]	Uhmk1	119.859	108.262	103.725	99.2395	104.126	97.9879		-0.158735	0.0297967	0.00496485
	ENSMUSG00000028796	polyhomeotic 2 [Source:MGI Symbol;Acc:MGI:1860454]	Phc2	61.4574	60.6486	61.0358	70.3348	64.2766	67.0423		0.155514	0.0297967	0.00496197
	ENSMUSG00000002221	PAX interacting (with transcription-activation domain) protein 1 [Source:MGI Symbol;Acc:MGI:1890430]	Paxip1	44.5583	45.0375	42.3834	47.4748	45.6839	49.8183		0.158191	0.0297967	0.00495469
	ENSMUSG00000026117	zeta-chain (TCR) associated protein kinase [Source:MGI Symbol;Acc:MGI:99613]	Zap70	217.609	209.963	236.077	243.79	241.047	242.549		0.181949	0.0297967	0.00496072
	ENSMUSG00000097573	RIKEN cDNA G730003C15 gene [Source:MGI Symbol;Acc:MGI:3641700]	G730003C15Rik	0.201737	0.197248	0.439776	0.529876	0.364999	0.995654		1.66159	0.0297967	0.00495662
	ENSMUSG00000067928	zinc finger protein 760 [Source:MGI Symbol;Acc:MGI:2679257]	Zfp760	11.565	13.1652	10.0121	10.7288	9.88654	9.10337		-0.305907	0.029822	0.00497298
	ENSMUSG00000071302	RIKEN cDNA 2610044O15 gene [Source:MGI Symbol;Acc:MGI:1919389]	2610044O15Rik8	23.206	23.1322	22.235	21.2998	19.0822	18.2694		-0.272484	0.0299187	0.00499303
	ENSMUSG00000030325	killer cell lectin-like receptor subfamily B member 1C [Source:MGI Symbol;Acc:MGI:107538]	Klrb1c	8.29837	11.5874	11.1798	3.15534	10.6024	5.76766		-0.706452	0.0299389	0.00500789
	ENSMUSG00000021565	solute carrier family 6 (neurotransmitter transporter), member 19 [Source:MGI Symbol;Acc:MGI:1921588]	Slc6a19	6.14132	6.70217	4.46259	2.95506	4.33513	4.46121		-0.48841	0.0299389	0.0050121
	ENSMUSG00000027936	CREB regulated transcription coactivator 2 [Source:MGI Symbol;Acc:MGI:1921593]	Crtc2	53.8742	52.0264	49.0855	60.2043	49.3802	63.107		0.221957	0.0299389	0.00500958
	ENSMUSG00000103164	predicted gene, 38150 [Source:MGI Symbol;Acc:MGI:5611378]	Gm38150	0.257638	0	1.34793	1.23037	1.86457	0.968801		1.93124	0.0299389	0.00500503
	ENSMUSG00000030590	family with sequence similarity 98, member C [Source:MGI Symbol;Acc:MGI:1921083]	Fam98c	22.8355	24.3419	23.2807	31.8139	22.3665	29.0533		0.281357	0.0299481	0.00501756
	ENSMUSG00000032021	cytotoxic and regulatory T cell molecule [Source:MGI Symbol;Acc:MGI:1859822]	Crtam	14.3892	16.0957	13.5564	13.4399	11.5388	12.0761		-0.268313	0.0300073	0.00503458
	ENSMUSG00000022307	oxidation resistance 1 [Source:MGI Symbol;Acc:MGI:2179326]	Oxr1	34.5963	35.0391	29.3135	33.4176	29.26	29.1329		-0.169054	0.0300073	0.00503536
	ENSMUSG00000056531	coiled-coil domain containing 18 [Source:MGI Symbol;Acc:MGI:1922974]	Ccdc18	6.42634	5.73465	4.11986	4.96219	4.71634	4.01617		-0.408784	0.0300129	0.00504415
	ENSMUSG00000040033	signal transducer and activator of transcription 2 [Source:MGI Symbol;Acc:MGI:103039]	Stat2	41.9355	42.834	34.425	35.8865	32.0346	36.3191		-0.185374	0.0300129	0.00504356
	ENSMUSG00000002319	importin 4 [Source:MGI Symbol;Acc:MGI:1923001]	Ipo4	11.548	11.7056	14.1583	15.5321	13.4026	14.3965		0.278361	0.0300999	0.00506667
	ENSMUSG00000007721	coiled-coil domain containing 124 [Source:MGI Symbol;Acc:MGI:1916403]	Ccdc124	88.644	81.9048	104.777	93.2565	111.249	113.154		0.338973	0.0300999	0.00506297
	ENSMUSG00000039929	URB1 ribosome biogenesis 1 homolog (S. cerevisiae) [Source:MGI Symbol;Acc:MGI:2146468]	Urb1	27.3287	26.1366	26.6569	30.1898	30.8326	28.9392		0.158798	0.0303876	0.00512307
	ENSMUSG00000068328	ancient ubiquitous protein 1 [Source:MGI Symbol;Acc:MGI:107789]	Aup1	124.948	126.327	128.511	138.489	128.019	141.655		0.161838	0.0303876	0.0051213
	ENSMUSG00000090544	predicted gene 6576 [Source:MGI Symbol;Acc:MGI:3646644]	Gm6576	1.71448	1.71931	1.60999	1.3856	1.19307	0.495921		-1.26905	0.0304075	0.00513189
	ENSMUSG00000030641	DNA damage-induced apoptosis suppressor [Source:MGI Symbol;Acc:MGI:1921291]	Ddias	31.6139	29.5264	30.0354	24.3663	29.453	25.136		-0.225787	0.0304075	0.0051344
	ENSMUSG00000097177	RIKEN cDNA 9330159M07 gene [Source:MGI Symbol;Acc:MGI:2442519]	9330159M07Rik	0.371285	0.284724	0.228532	0.22946	0.197577	0.102658		-1.20288	0.0304092	0.00514082
	ENSMUSG00000038037	suppressor of cytokine signaling 1 [Source:MGI Symbol;Acc:MGI:1354910]	Socs1	50.4174	49.5434	56.7083	54.6949	60.3541	63.697		0.300132	0.0304092	0.00514638
	ENSMUSG00000047676	ribosomal protein SA, pseudogene 10 [Source:MGI Symbol;Acc:MGI:3704228]	Rpsa-ps10	29.0802	38.9401	30.7501	43.8619	35.235	44.532		0.40719	0.0304092	0.00514664
	ENSMUSG00000090460	predicted gene, 17511 [Source:MGI Symbol;Acc:MGI:4937145]	Gm17511	6.12908	7.54635	5.04752	9.1062	7.70087	13.7643		0.882512	0.0304179	0.00515211
	ENSMUSG00000096967	predicted gene, 26621 [Source:MGI Symbol;Acc:MGI:5477115]	Gm26621	1.54355	1.95638	1.15901	1.18761	0.892122	0.846453		-0.813976	0.030465	0.00516685
	ENSMUSG00000015214	myotubularin related protein 1 [Source:MGI Symbol;Acc:MGI:1858271]	Mtmr1	88.1891	85.689	80.5906	81.706	80.1033	75.2626		-0.139178	0.030465	0.00516807
	ENSMUSG00000056418	cDNA sequence BC043934 [Source:MGI Symbol;Acc:MGI:2679715]	BC043934	22.6381	18.7513	17.1108	17.8924	17.6176	15.0551		-0.328465	0.030467	0.00517376
	ENSMUSG00000024212	myeloid/lymphoid or mixed-lineage leukemia; translocated to, 1 [Source:MGI Symbol;Acc:MGI:1927238]	Mllt1	65.4785	57.2696	60.4911	73.3556	66.1181	72.1169		0.236649	0.030467	0.00517639
	ENSMUSG00000092981	microRNA 5125 [Source:MGI Symbol;Acc:MGI:4950450]	Mir5125	166.571	176.797	151.674	261.873	152.021	284.08		0.608899	0.0305117	0.005188
	ENSMUSG00000040703	cytochrome P450, family 2, subfamily s, polypeptide 1 [Source:MGI Symbol;Acc:MGI:1921384]	Cyp2s1	2.12246	1.66019	1.4806	0.540587	1.08804	1.175		-0.769618	0.0305157	0.00519519
	ENSMUSG00000024887	N-acylsphingosine amidohydrolase 2 [Source:MGI Symbol;Acc:MGI:1859310]	Asah2	1.26079	1.27839	1.12555	1.0704	1.19487	0.743125		-0.533143	0.0305157	0.00519666
	ENSMUSG00000038722	BUD31 homolog [Source:MGI Symbol;Acc:MGI:2141291]	Bud31	171.386	190.311	203.467	145.375	171.608	150.094		-0.240216	0.0307098	0.00523608
	ENSMUSG00000045679	PQ loop repeat containing [Source:MGI Symbol;Acc:MGI:2444067]	Pqlc3	42.7653	43.0067	34.9434	32.2077	34.2848	35.891		-0.218447	0.0307098	0.00524337
	ENSMUSG00000027706	SEC62 homolog (S. cerevisiae) [Source:MGI Symbol;Acc:MGI:1916526]	Sec62	104.654	107.071	85.3878	98.984	87.8587	88.4518		-0.169772	0.0307098	0.00524583
	ENSMUSG00000037337	mitogen-activated protein kinase kinase kinase kinase 1 [Source:MGI Symbol;Acc:MGI:1346882]	Map4k1	125.536	128.724	117.451	152.904	136.333	136.87		0.166514	0.0307098	0.00524079
	ENSMUSG00000100210	H3 clustered histone 7 [Source:MGI Symbol;Acc:MGI:2448329]	H3c7	0.369397	0.120392	0.161053	1.32307	0.501259	2.34402		2.70205	0.0307731	0.00526068
	ENSMUSG00000026603	SET and MYND domain containing 2 [Source:MGI Symbol;Acc:MGI:1915889]	Smyd2	66.9484	75.0972	72.8039	89.7748	79.641	78.2882		0.193504	0.0308064	0.00527041
	ENSMUSG00000078616	tripartite motif-containing 30C [Source:MGI Symbol;Acc:MGI:4821257]	Trim30c	4.20749	6.10444	2.72205	2.07414	2.33288	2.74324		-0.768795	0.0308526	0.00528235
	ENSMUSG00000097835	predicted gene, 26910 [Source:MGI Symbol;Acc:MGI:5477404]	Gm26910	6.50666	5.43749	4.36436	5.89592	2.86764	2.82313		-0.839483	0.0310159	0.00531438
	ENSMUSG00000051223	basic leucine zipper and W2 domains 1 [Source:MGI Symbol;Acc:MGI:1914132]	Bzw1	518.998	506.526	531.515	430.148	505.869	443.816		-0.167122	0.0310736	0.00533215
	ENSMUSG00000044864	ankyrin repeat domain 50 [Source:MGI Symbol;Acc:MGI:2139777]	Ankrd50	24.6759	27.1264	23.9089	39.7085	24.0848	30.5858		0.274294	0.0310736	0.00533241
	ENSMUSG00000020770	unkempt family zinc finger [Source:MGI Symbol;Acc:MGI:2442456]	Unk	29.6773	25.177	25.2602	35.1622	30.6216	31.4264		0.245803	0.0310877	0.00533891
	ENSMUSG00000079853	killer cell lectin-like receptor, subfamily A, member 1 [Source:MGI Symbol;Acc:MGI:101907]	Klra1	8.5821	11.4464	8.86497	3.90929	8.48039	5.9578		-0.649605	0.0311955	0.00536811
	ENSMUSG00000031021	TMEM9 domain family, member B [Source:MGI Symbol;Acc:MGI:1915254]	Tmem9b	139.429	134.904	110.928	113.392	115.714	112.701		-0.206416	0.0311955	0.00536409
	ENSMUSG00000044894	ubiquinol-cytochrome c reductase, complex III subunit VII [Source:MGI Symbol;Acc:MGI:107807]	Uqcrq	102.079	93.7753	143.027	112.319	134.403	136.141		0.368424	0.0311955	0.00536969
	ENSMUSG00000024589	neural precursor cell expressed, developmentally down-regulated gene 4-like [Source:MGI Symbol;Acc:MGI:1933754]	Nedd4l	3.92577	4.54662	3.75818	6.27795	4.6049	4.73449		0.268127	0.0312039	0.00537522
	ENSMUSG00000029480	DEAH (Asp-Glu-Ala-His) box polypeptide 37 [Source:MGI Symbol;Acc:MGI:3028576]	Dhx37	30.3648	29.0999	29.8731	31.3265	34.3052	34.1018		0.202585	0.0312367	0.00538498
	ENSMUSG00000106333	RIKEN cDNA 4930428O21 gene [Source:MGI Symbol;Acc:MGI:1923034]	4930428O21Rik	3.48019	5.14775	2.74286	1.66199	3.32996	2.07624		-0.784626	0.0313055	0.00541066
	ENSMUSG00000052428	transmembrane and coiled-coil domains 1 [Source:MGI Symbol;Acc:MGI:1921173]	Tmco1	48.4241	47.7369	45.5073	35.3009	46.6591	40.3751		-0.206273	0.0313055	0.00541326
	ENSMUSG00000025860	X-linked inhibitor of apoptosis [Source:MGI Symbol;Acc:MGI:107572]	Xiap	61.8604	56.2592	51.9249	52.9406	51.211	51.2168		-0.14958	0.0313055	0.00541078
	ENSMUSG00000081094	ribosomal protein L19, pseudogene 11 [Source:MGI Symbol;Acc:MGI:3642193]	Rpl19-ps11	69.5563	78.6046	82.3006	90.5238	84.4923	93.7295		0.313635	0.0313055	0.0054123
	ENSMUSG00000036241	ubiquitin-conjugating enzyme E2R 2 [Source:MGI Symbol;Acc:MGI:1914865]	Ube2r2	58.824	61.9002	58.6382	71.8759	61.9413	66.4322		0.166552	0.031519	0.00545844
	ENSMUSG00000024201	lysine (K)-specific demethylase 4B [Source:MGI Symbol;Acc:MGI:2442355]	Kdm4b	25.4792	26.6413	23.5657	32.9246	24.6206	29.8567		0.214455	0.031519	0.00545642
	ENSMUSG00000100954	predicted gene 10138 [Source:MGI Symbol;Acc:MGI:3708522]	Gm10138	0.778262	0.266998	0.78578	0.860699	0.704049	1.57877		1.25389	0.0315292	0.00546433
	ENSMUSG00000026238	prothymosin alpha [Source:MGI Symbol;Acc:MGI:97803]	Ptma	2045.33	1915.23	2123.19	1973.38	2319.1	2258.16		0.179181	0.0316092	0.00548234
	ENSMUSG00000031231	cytochrome c oxidase subunit 7B [Source:MGI Symbol;Acc:MGI:1913392]	Cox7b	449.023	459.321	491.41	361.804	447.599	389.563		-0.194713	0.0316227	0.00549182
	ENSMUSG00000024048	myosin, light chain 12A, regulatory, non-sarcomeric [Source:MGI Symbol;Acc:MGI:1914518]	Myl12a	167.539	162.885	169.875	131.617	150.654	146.129		-0.172588	0.0316227	0.00549298
	ENSMUSG00000032446	eomesodermin [Source:MGI Symbol;Acc:MGI:1201683]	Eomes	345.406	290.586	313.895	212.681	307.043	246.008		-0.314665	0.0316878	0.00550845
	ENSMUSG00000032434	CKLF-like MARVEL transmembrane domain containing 6 [Source:MGI Symbol;Acc:MGI:2447165]	Cmtm6	188.897	196.124	171.12	166.774	171.129	170.004		-0.131965	0.0318451	0.00553996
	ENSMUSG00000090083	ring finger protein 8 [Source:MGI Symbol;Acc:MGI:1929069]	Rnf8	1.33339	1.32317	1.47505	1.94833	1.29626	2.0112		0.475638	0.0318872	0.00555147
	ENSMUSG00000027637	RAB5 interacting factor [Source:MGI Symbol;Acc:MGI:1914638]	Rab5if	76.5804	79.9527	74.6992	67.0996	70.0485	67.6447		-0.168105	0.0319972	0.00557481
	ENSMUSG00000042042	chondroitin sulfate N-acetylgalactosaminyltransferase 2 [Source:MGI Symbol;Acc:MGI:1926002]	Csgalnact2	16.8747	18.6488	15.0878	13.4993	14.975	13.9913		-0.265022	0.032201	0.00562105
	ENSMUSG00000037465	Kruppel-like factor 10 [Source:MGI Symbol;Acc:MGI:1101353]	Klf10	38.6503	39.9608	36.448	35.4517	36.2504	32.7716		-0.181331	0.032201	0.00562173
	ENSMUSG00000055866	period circadian clock 2 [Source:MGI Symbol;Acc:MGI:1195265]	Per2	1.9886	3.03319	2.75709	4.33051	2.9863	3.6828		0.58344	0.032201	0.00562299
	ENSMUSG00000023286	ubiquitin-conjugating enzyme E2J 2 [Source:MGI Symbol;Acc:MGI:2153608]	Ube2j2	36.1058	35.8103	40.0511	42.7093	39.9744	41.0685		0.188456	0.0322254	0.00563147
	ENSMUSG00000030059	TATA element modulatory factor 1 [Source:MGI Symbol;Acc:MGI:2684999]	Tmf1	44.2893	45.1843	40.3378	39.6431	38.853	38.1977		-0.17027	0.0322288	0.00564473
	ENSMUSG00000000384	transforming growth factor beta regulated gene 4 [Source:MGI Symbol;Acc:MGI:1100868]	Tbrg4	76.6268	71.3891	80.5265	79.4169	85.6237	83.7942		0.175792	0.0322288	0.00564075
	ENSMUSG00000024013	FYVE, RhoGEF and PH domain containing 2 [Source:MGI Symbol;Acc:MGI:1347084]	Fgd2	0.490925	0.404211	0.450607	1.01182	0.98172	0.898726		1.03637	0.0322288	0.00564402
	ENSMUSG00000021930	SPRY domain containing 7 [Source:MGI Symbol;Acc:MGI:1913924]	Spryd7	13.0071	11.7598	14.133	10.5334	9.68717	10.5043		-0.273658	0.0322655	0.0056554
	ENSMUSG00000040430	phosphatidylinositol transfer protein, cytoplasmic 1 [Source:MGI Symbol;Acc:MGI:1919045]	Pitpnc1	67.3847	65.5063	52.5689	59.9192	55.5578	54.8035		-0.184626	0.0322849	0.00566302
	ENSMUSG00000017210	mediator complex subunit 24 [Source:MGI Symbol;Acc:MGI:1344385]	Med24	40.5657	41.4654	36.5702	45.1173	39.2473	46.3523		0.179716	0.0323671	0.00568169
	ENSMUSG00000024101	WASH complex subunit 1 [Source:MGI Symbol;Acc:MGI:1916017]	Washc1	43.1438	40.9585	43.9166	47.2488	45.2918	47.5147		0.172828	0.0326247	0.00573154
	ENSMUSG00000024170	telomere maintenance 2 [Source:MGI Symbol;Acc:MGI:1918968]	Telo2	10.8365	11.3397	10.3497	14.5319	11.7507	12.5665		0.231544	0.0326247	0.00573546
	ENSMUSG00000024402	lymphotoxin A [Source:MGI Symbol;Acc:MGI:104797]	Lta	36.8808	36.7737	33.9215	48.3345	34.1257	48.9984		0.359829	0.0327074	0.00575428
	ENSMUSG00000042473	TBC1 domain family, member 8B [Source:MGI Symbol;Acc:MGI:1918101]	Tbc1d8b	19.9563	18.7329	14.7708	15.3893	16.719	14.8319		-0.263696	0.0327088	0.00577345
	ENSMUSG00000031590	FSHD region gene 1 [Source:MGI Symbol;Acc:MGI:893597]	Frg1	187.869	186.388	174.44	177.11	162.524	161.169		-0.158381	0.0327088	0.00576857
	ENSMUSG00000051319	mitoregulin [Source:MGI Symbol;Acc:MGI:1915135]	Mtln	16.7401	16.6996	23.1013	26.6942	25.4152	23.8107		0.486822	0.0327088	0.00576116
	ENSMUSG00000031398	plexin A3 [Source:MGI Symbol;Acc:MGI:107683]	Plxna3	0.133004	0.0577975	0.0773179	0.282299	0.213904	0.208391		1.22128	0.0327088	0.00577598
	ENSMUSG00000074403	H3 clustered histone 13 [Source:MGI Symbol;Acc:MGI:2448351]	H3c13	0.715897	0	0.83233	3.64675	0.647631	2.46766		2.39628	0.0327088	0.0057674
	ENSMUSG00000028251	thiosulfate sulfurtransferase (rhodanese)-like domain containing 3 [Source:MGI Symbol;Acc:MGI:1924282]	Tstd3	31.6798	31.166	27.1765	17.7205	25.0765	23.577		-0.394662	0.0328959	0.00581333
	ENSMUSG00000035441	myosin ID [Source:MGI Symbol;Acc:MGI:107728]	Myo1d	0.0540383	0.0704477	0.0942406	0.0172043	0	0.0169334		-1.82413	0.0330005	0.00583613
	ENSMUSG00000014668	checkpoint with forkhead and ring finger domains [Source:MGI Symbol;Acc:MGI:2444898]	Chfr	88.7895	89.9187	79.7112	79.8409	78.8982	78.3864		-0.135741	0.0330673	0.00585229
	ENSMUSG00000068134	zinc finger protein 120 [Source:MGI Symbol;Acc:MGI:1345179]	Zfp120	33.2379	36.7048	30.9552	29.8906	29.6111	29.42		-0.187401	0.0332896	0.00589599
	ENSMUSG00000098161	pluripotency associated transcript 11 [Source:MGI Symbol;Acc:MGI:5504090]	Platr11	8.70393	7.43423	6.5428	4.0133	3.25818	3.66796		-1.06054	0.033402	0.00593341
	ENSMUSG00000073412	leukocyte specific transcript 1 [Source:MGI Symbol;Acc:MGI:1096324]	Lst1	18.5202	17.9251	13.4577	10.4525	11.1694	10.5518		-0.676948	0.033402	0.00592404
	ENSMUSG00000028245	neutral sphingomyelinase (N-SMase) activation associated factor [Source:MGI Symbol;Acc:MGI:1341864]	Nsmaf	68.3018	69.7753	60.6863	62.3784	60.6053	60.6113		-0.131269	0.033402	0.00593089
	ENSMUSG00000051495	interferon regulatory factor 2 binding protein 2 [Source:MGI Symbol;Acc:MGI:2443921]	Irf2bp2	42.982	41.51	39.9181	48.8036	44.9388	49.0049		0.225591	0.033402	0.00592508
	ENSMUSG00000051285	protein-L-isoaspartate (D-aspartate) O-methyltransferase domain containing 1 [Source:MGI Symbol;Acc:MGI:2441773]	Pcmtd1	26.3217	26.9224	19.1979	25.6418	19.9328	20.4175		-0.247974	0.0334815	0.00595669
	ENSMUSG00000019082	solute carrier family 25 (mitochondrial carrier, glutamate), member 22 [Source:MGI Symbol;Acc:MGI:1915517]	Slc25a22	21.4947	20.345	21.912	24.6694	21.7482	25.2128		0.236614	0.0334815	0.00595915
	ENSMUSG00000023912	solute carrier family 25, member 27 [Source:MGI Symbol;Acc:MGI:1921261]	Slc25a27	1.92361	1.96761	1.52252	3.25056	1.95436	2.86553		0.56404	0.0334815	0.00596071
	ENSMUSG00000058392	ribosomal RNA processing 1B [Source:MGI Symbol;Acc:MGI:1919712]	Rrp1b	47.2914	44.5297	49.5926	54.7684	49.5498	51.7038		0.175157	0.0335461	0.0059766
	ENSMUSG00000041696	RAS-like, family 12 [Source:MGI Symbol;Acc:MGI:1918034]	Rasl12	1.27658	0.739658	1.05131	0.186279	0.866137	0.500036		-1.02636	0.0336012	0.00599082
	ENSMUSG00000059422	predicted gene 8116 [Source:MGI Symbol;Acc:MGI:3648797]	Gm8116	1.8423	1.13766	1.94464	1.48177	1.5789	0.364611		-1.36853	0.0337187	0.00601619
	ENSMUSG00000060477	interleukin-1 receptor-associated kinase 2 [Source:MGI Symbol;Acc:MGI:2429603]	Irak2	11.6664	13.0412	9.8276	8.69739	10.0763	9.15596		-0.329861	0.0337475	0.00602575
	ENSMUSG00000049504	proline and serine rich 1 [Source:MGI Symbol;Acc:MGI:1919933]	Proser1	27.9608	25.7743	26.5237	29.7257	27.5517	31.0303		0.192168	0.033858	0.00604993
	ENSMUSG00000026879	gelsolin [Source:MGI Symbol;Acc:MGI:95851]	Gsn	38.8421	36.6914	38.1474	13.5289	27.3965	23.0601		-0.748533	0.0339107	0.00606729
	ENSMUSG00000036686	coiled-coil and C2 domain containing 1A [Source:MGI Symbol;Acc:MGI:2384831]	Cc2d1a	37.5096	33.8412	32.5434	40.9527	38.0786	39.5702		0.185263	0.0339107	0.00607085
	ENSMUSG00000053950	ADNP homeobox 2 [Source:MGI Symbol;Acc:MGI:2448562]	Adnp2	25.9997	26.3525	25.1429	30.647	27.6402	29.3126		0.188841	0.0339107	0.00608057
	ENSMUSG00000037643	protein kinase C, iota [Source:MGI Symbol;Acc:MGI:99260]	Prkci	14.2235	14.3036	13.9026	16.0296	15.5811	16.4084		0.212968	0.0339107	0.0060766
	ENSMUSG00000083011	predicted gene 12816 [Source:MGI Symbol;Acc:MGI:3649628]	Gm12816	0.864747	2.12942	1.00539	2.93665	1.47765	3.25172		1.15701	0.0339107	0.00608158
	ENSMUSG00000027544	nuclear factor of activated T cells, cytoplasmic, calcineurin dependent 2 [Source:MGI Symbol;Acc:MGI:102463]	Nfatc2	60.4831	56.5897	63.8179	61.1542	69.7539	67.0943		0.192611	0.0339218	0.00609245
	ENSMUSG00000030084	plexin A1 [Source:MGI Symbol;Acc:MGI:107685]	Plxna1	2.48237	1.87798	2.5459	2.8132	2.75762	2.95028		0.383566	0.0339218	0.00609112
	ENSMUSG00000030345	dual-specificity tyrosine-(Y)-phosphorylation regulated kinase 4 [Source:MGI Symbol;Acc:MGI:1330292]	Dyrk4	17.7719	17.5593	17.6989	27.6948	17.8541	22.0268		0.326983	0.0339664	0.00610492
	ENSMUSG00000099241	GTPase, very large interferon inducible, pseudogene 2 [Source:MGI Symbol;Acc:MGI:5011037]	Gvin-ps2	2.30118	2.78869	1.89353	1.14538	2.34563	1.31016		-0.716839	0.0339786	0.00611156
	ENSMUSG00000030122	parathymosin [Source:MGI Symbol;Acc:MGI:1916452]	Ptms	160.689	149.564	168.404	204.658	197.812	176.417		0.241986	0.034002	0.00612023
	ENSMUSG00000026466	torsin A interacting protein 1 [Source:MGI Symbol;Acc:MGI:3582693]	Tor1aip1	79.8322	77.1431	66.062	63.5546	68.634	67.5964		-0.163057	0.0340036	0.0061349
	ENSMUSG00000025793	HGF-regulated tyrosine kinase substrate [Source:MGI Symbol;Acc:MGI:104681]	Hgs	57.3281	54.8305	54.4838	61.6926	59.4216	61.529		0.152275	0.0340036	0.00613834
	ENSMUSG00000037474	denticleless E3 ubiquitin protein ligase [Source:MGI Symbol;Acc:MGI:1924093]	Dtl	29.0515	27.652	27.4434	32.7617	30.3772	30.9043		0.159251	0.0340036	0.00613599
	ENSMUSG00000025422	ArfGAP with GTPase domain, ankyrin repeat and PH domain 2 [Source:MGI Symbol;Acc:MGI:3580016]	Agap2	97.6743	90.7158	87.1526	100.517	89.247	108.185		0.177857	0.0340036	0.00612994
	ENSMUSG00000032301	proteasome subunit alpha 4 [Source:MGI Symbol;Acc:MGI:1347060]	Psma4	294.08	297.672	312.988	220.997	283.462	253.962		-0.207924	0.0340215	0.00615496
	ENSMUSG00000036270	enhancer of mRNA decapping 4 [Source:MGI Symbol;Acc:MGI:2446249]	Edc4	65.5032	61.7533	57.5793	71.7696	62.4575	69.2655		0.146678	0.0340215	0.00615
	ENSMUSG00000045010	predicted gene 4779 [Source:MGI Symbol;Acc:MGI:3646776]	Gm4779	0	0.0642195	0	1.41149	0.356507	0.185236		2.8032	0.0340215	0.00615205
	ENSMUSG00000033352	mitogen-activated protein kinase kinase 4 [Source:MGI Symbol;Acc:MGI:1346869]	Map2k4	77.7016	73.694	68.4727	64.2457	72.9575	63.4455		-0.17445	0.034278	0.00621035
	ENSMUSG00000029422	arginine/serine-rich coiled-coil 2 [Source:MGI Symbol;Acc:MGI:1913489]	Rsrc2	58.2405	58.6304	50.9212	52.6866	49.2964	50.7854		-0.15004	0.034278	0.0062092
	ENSMUSG00000020534	serine hydroxymethyltransferase 1 (soluble) [Source:MGI Symbol;Acc:MGI:98299]	Shmt1	43.2161	40.7394	45.9734	50.9582	50.5171	46.3498		0.179698	0.0343416	0.00622638
	ENSMUSG00000035849	keratin 222 [Source:MGI Symbol;Acc:MGI:2442728]	Krt222	1.16736	1.42961	0.863681	0.337867	0.832031	0.665095		-0.875125	0.0343494	0.00624789
	ENSMUSG00000027863	CD2 antigen [Source:MGI Symbol;Acc:MGI:88320]	Cd2	589.018	620.339	588.676	514.794	600.017	505.369		-0.183662	0.0343494	0.00624859
	ENSMUSG00000024055	cytochrome P450, family 4, subfamily f, polypeptide 13 [Source:MGI Symbol;Acc:MGI:2158641]	Cyp4f13	5.06087	5.43539	5.78489	6.83734	5.71692	6.82829		0.337999	0.0343494	0.0062523
	ENSMUSG00000084106	predicted pseudogene 6136 [Source:MGI Symbol;Acc:MGI:3646897]	Gm6136	16.7294	20.4464	21.1978	21.7208	21.0459	26.785		0.436895	0.0343494	0.00625482
	ENSMUSG00000087590	erythrocyte membrane protein band 4.1 like 4a, opposite strand [Source:MGI Symbol;Acc:MGI:1916999]	Epb41l4aos	75.8296	53.3117	87.1391	129.85	90.6482	86.8159		0.450032	0.0343494	0.00624368
	ENSMUSG00000036151	transmembrane 6 superfamily member 2 [Source:MGI Symbol;Acc:MGI:1933210]	Tm6sf2	0.306293	0.0798605	0.267081	0.585091	0.554171	0.633467		1.5524	0.0343494	0.00624468
	ENSMUSG00000106019	predicted gene 43672 [Source:MGI Symbol;Acc:MGI:5663809]	Gm43672	23.5462	20.0841	20.3558	14.0076	20.814	16.5066		-0.343163	0.034445	0.00628043
	ENSMUSG00000038351	small G protein signaling modulator 2 [Source:MGI Symbol;Acc:MGI:2144695]	Sgsm2	4.78734	4.65324	4.52848	6.4467	4.91236	5.88402		0.318151	0.034445	0.00628126
	ENSMUSG00000090862	ribosomal protein S13 [Source:MGI Symbol;Acc:MGI:1915302]	Rps13	555	543.115	701.791	733.28	674.877	643.829		0.234479	0.034486	0.00629325
	ENSMUSG00000008892	voltage-dependent anion channel 3 [Source:MGI Symbol;Acc:MGI:106922]	Vdac3	44.3465	40.0265	41.2172	34.8247	39.8845	36.3367		-0.175421	0.034512	0.00630251
	ENSMUSG00000039515	protein phosphatase 2 protein activator [Source:MGI Symbol;Acc:MGI:1346006]	Ptpa	158.001	151.522	159.382	163.001	173.982	169.318		0.145267	0.0345968	0.00632254
	ENSMUSG00000086290	small nucleolar RNA host gene 12 [Source:MGI Symbol;Acc:MGI:1916721]	Snhg12	26.4709	26.1663	27.986	35.8867	29.5167	31.7212		0.27935	0.0346408	0.00633512
	ENSMUSG00000000290	integrin beta 2 [Source:MGI Symbol;Acc:MGI:96611]	Itgb2	631.446	633.374	587.04	512.688	561.05	558.421		-0.15508	0.0346444	0.00634033
	ENSMUSG00000045248	mediator complex subunit 26 [Source:MGI Symbol;Acc:MGI:1917875]	Med26	18.1459	18.7932	21.4473	25.4591	23.0591	21.5515		0.257398	0.0346574	0.00634724
	ENSMUSG00000070420	zinc finger and SCAN domain containing 25 [Source:MGI Symbol;Acc:MGI:3647079]	Zscan25	39.1396	37.9537	40.6071	52.0938	41.6911	44.4031		0.224253	0.0346837	0.00635661
	ENSMUSG00000032231	annexin A2 [Source:MGI Symbol;Acc:MGI:88246]	Anxa2	551.019	556.478	546.776	334.989	554.411	450.28		-0.275421	0.0347573	0.00637922
	ENSMUSG00000002870	minichromosome maintenance complex component 2 [Source:MGI Symbol;Acc:MGI:105380]	Mcm2	182.33	166.656	182.286	192.566	209.681	192.21		0.17442	0.0347573	0.00637522
	ENSMUSG00000043311	DNA segment, Chr 17, human D6S53E [Source:MGI Symbol;Acc:MGI:90673]	D17H6S53E	28.347	25.0361	21.2887	22.9769	23.2874	19.9263		-0.286571	0.0347687	0.00638585
	ENSMUSG00000002129	splicing factor 3a, subunit 1 [Source:MGI Symbol;Acc:MGI:1914715]	Sf3a1	129.619	124.722	121.632	132.541	136.694	137.222		0.134338	0.0347819	0.00639284
	ENSMUSG00000047293	G protein-coupled receptor 15 [Source:MGI Symbol;Acc:MGI:1918473]	Gpr15	10.3798	10.1025	7.00519	5.29646	6.49581	7.2181		-0.473379	0.0348215	0.00640813
	ENSMUSG00000032589	bassoon [Source:MGI Symbol;Acc:MGI:1277955]	Bsn	0.482235	0.533419	0.758173	1.00493	0.892331	0.755565		0.594549	0.0348215	0.00640925
	ENSMUSG00000037552	pleckstrin homology domain containing, family G (with RhoGef domain) member 2 [Source:MGI Symbol;Acc:MGI:2141874]	Plekhg2	17.3899	16.3273	14.088	27.5242	15.5457	21.0832		0.356251	0.0348524	0.00642408
	ENSMUSG00000063018	RIKEN cDNA 2010204K13 gene [Source:MGI Symbol;Acc:MGI:1922859]	2010204K13Rik	1.0299	1.15084	1.53952	3.58339	1.66374	2.07469		0.893272	0.0348524	0.00642354
	ENSMUSG00000052446	zinc finger protein 961 [Source:MGI Symbol;Acc:MGI:3583954]	Zfp961	28.616	29.3541	25.6555	24.8936	26.4464	24.2238		-0.179661	0.0348695	0.00644094
	ENSMUSG00000027490	E2F transcription factor 1 [Source:MGI Symbol;Acc:MGI:101941]	E2f1	54.3125	53.14	49.4843	60.5852	57.751	58.7289		0.169959	0.0348695	0.00643624
	ENSMUSG00000029545	acyl-Coenzyme A dehydrogenase, short chain [Source:MGI Symbol;Acc:MGI:87868]	Acads	46.6015	50.5826	45.7822	55.1472	52.5115	54.0859		0.192559	0.0348695	0.00644002
	ENSMUSG00000035790	centrosomal protein 19 [Source:MGI Symbol;Acc:MGI:1914244]	Cep19	33.3197	37.6286	35.6072	28.0129	31.7067	28.072		-0.27571	0.0348856	0.0064485
	ENSMUSG00000047193	dynein cytoplasmic 2 heavy chain 1 [Source:MGI Symbol;Acc:MGI:107736]	Dync2h1	3.98195	4.41106	4.21755	3.49707	3.98245	3.2545		-0.273789	0.0349306	0.00647519
	ENSMUSG00000024642	transducin-like enhancer of split 4 [Source:MGI Symbol;Acc:MGI:104633]	Tle4	64.006	58.0954	48.3145	60.8796	53.2098	45.4256		-0.261255	0.0349306	0.00647783
	ENSMUSG00000040651	transcription activation suppressor [Source:MGI Symbol;Acc:MGI:1921694]	Tasor	14.4594	14.483	12.0494	14.6429	11.5035	11.2632		-0.244068	0.0349306	0.00647971
	ENSMUSG00000099474	RIKEN cDNA 1700097N02 gene [Source:MGI Symbol;Acc:MGI:1914772]	1700097N02Rik	28.5274	29.1053	29.3216	41.7261	29.5473	38.2189		0.376446	0.0349306	0.00647847
	ENSMUSG00000078485	pleckstrin homology domain containing, family N member 1 [Source:MGI Symbol;Acc:MGI:2387630]	Plekhn1	10.6692	11.0288	8.93755	17.2688	9.71508	14.1181		0.393682	0.0349306	0.00647464
	ENSMUSG00000001151	pericentrin (kendrin) [Source:MGI Symbol;Acc:MGI:102722]	Pcnt	44.4194	40.9703	39.1422	49.1245	49.2935	46.937		0.197621	0.0350149	0.00649994
	ENSMUSG00000052155	activin receptor IIA [Source:MGI Symbol;Acc:MGI:102806]	Acvr2a	6.86099	7.95653	6.23266	5.34024	5.98442	5.46795		-0.341506	0.0350781	0.00651626
	ENSMUSG00000049728	zinc finger protein 668 [Source:MGI Symbol;Acc:MGI:2442943]	Zfp668	10.9615	9.16086	10.3821	11.5853	11.113	12.2913		0.258863	0.0351745	0.00653879
	ENSMUSG00000038608	dedicator of cytokinesis 10 [Source:MGI Symbol;Acc:MGI:2146320]	Dock10	141.169	138.285	125.625	141.439	122.551	119.974		-0.139422	0.0352097	0.00655457
	ENSMUSG00000040502	membrane associated ring-CH-type finger 9 [Source:MGI Symbol;Acc:MGI:2446144]	Marchf9	3.60439	3.8991	3.07608	7.54445	4.71759	4.61401		0.467502	0.0352097	0.00655009
	ENSMUSG00000026989	death associated protein-like 1 [Source:MGI Symbol;Acc:MGI:1923997]	Dapl1	164.989	167.242	142.222	110.407	108.141	133.498		-0.342797	0.0353834	0.00659904
	ENSMUSG00000020935	dephospho-CoA kinase domain containing [Source:MGI Symbol;Acc:MGI:1915337]	Dcakd	25.3316	23.1642	24.6709	29.1554	27.9856	28.3109		0.237828	0.0353834	0.00660082
	ENSMUSG00000022856	transmembrane protein 41a [Source:MGI Symbol;Acc:MGI:1913914]	Tmem41a	20.0367	20.5397	24.3407	28.7061	22.9287	26.0807		0.325332	0.0353834	0.00660017
	ENSMUSG00000032870	small ArfGAP 2 [Source:MGI Symbol;Acc:MGI:1917030]	Smap2	470.085	463.9	386.189	368.242	392.088	400.587		-0.178338	0.0354643	0.00662859
	ENSMUSG00000029471	calcium/calmodulin-dependent protein kinase kinase 2, beta [Source:MGI Symbol;Acc:MGI:2444812]	Camkk2	17.0398	15.6527	15.4813	18.9535	17.6143	19.1262		0.235909	0.0354643	0.00662249
	ENSMUSG00000004931	amyloid beta (A4) precursor protein-binding, family A, member 3 [Source:MGI Symbol;Acc:MGI:1888527]	Apba3	11.3632	10.4012	11.2788	13.0084	12.6855	13.9021		0.324774	0.0354643	0.00662984
	ENSMUSG00000043252	transmembrane protein 64 [Source:MGI Symbol;Acc:MGI:2140359]	Tmem64	19.0513	25.2916	22.1136	32.2483	24.7015	25.7394		0.29792	0.0355948	0.00665892
	ENSMUSG00000108393	predicted gene, 32633 [Source:MGI Symbol;Acc:MGI:5591792]	Gm32633	4.04349	3.37366	1.83344	1.08136	1.02422	1.52048		-1.2221	0.0356483	0.00667965
	ENSMUSG00000038679	transcriptional repressor GATA binding 1 [Source:MGI Symbol;Acc:MGI:1927616]	Trps1	3.9949	3.44931	2.84597	6.53389	4.21234	4.38553		0.378011	0.0356483	0.00667397
	ENSMUSG00000035202	leucyl-tRNA synthetase, mitochondrial [Source:MGI Symbol;Acc:MGI:2142973]	Lars2	207.533	191.901	218.427	362.404	236.299	348.376		0.718066	0.0356483	0.00668294
	ENSMUSG00000023942	solute carrier family 29 (nucleoside transporters), member 1 [Source:MGI Symbol;Acc:MGI:1927073]	Slc29a1	106.806	96.5888	96.1984	114.084	112.497	111.113		0.168964	0.0356844	0.00670374
	ENSMUSG00000019433	GIPC PDZ domain containing family, member 1 [Source:MGI Symbol;Acc:MGI:1926252]	Gipc1	59.3376	56.0196	62.8998	69.2829	71.2272	66.0393		0.220709	0.0356844	0.00669611
	ENSMUSG00000113101	predicted gene, 33424 [Source:MGI Symbol;Acc:MGI:5592583]	Gm33424	0	1.18144	1.18534	1.73114	1.63966	2.9818		2.08971	0.0356844	0.00670037
	ENSMUSG00000024592	RIKEN cDNA C330018D20 gene [Source:MGI Symbol;Acc:MGI:1924672]	C330018D20Rik	7.92439	6.76194	7.44385	5.64213	6.35411	5.62103		-0.34361	0.0357563	0.00672193
	ENSMUSG00000021866	annexin A11 [Source:MGI Symbol;Acc:MGI:108481]	Anxa11	61.4227	60.0284	61.8106	64.7987	65.3998	66.3731		0.137531	0.0358907	0.0067519
	ENSMUSG00000011958	BCL2/adenovirus E1B interacting protein 2 [Source:MGI Symbol;Acc:MGI:109327]	Bnip2	128.991	127.252	124.851	115.218	118.307	113.625		-0.132878	0.0359145	0.0067611
	ENSMUSG00000028066	polyamine-modulated factor 1 [Source:MGI Symbol;Acc:MGI:1914287]	Pmf1	67.1257	61.4658	66.8797	67.3979	72.4964	73.9351		0.190648	0.0360037	0.00679303
	ENSMUSG00000026000	LanC (bacterial lantibiotic synthetase component C)-like 1 [Source:MGI Symbol;Acc:MGI:1336997]	Lancl1	13.2861	13.7149	13.6566	18.362	14.5519	15.2815		0.220957	0.0360037	0.00679678
	ENSMUSG00000035262	anti-Mullerian hormone [Source:MGI Symbol;Acc:MGI:88006]	Amh	0.767053	0.363628	0.608049	0.999033	0.693909	1.57329		1.16487	0.0360037	0.00679536
	ENSMUSG00000090230	predicted gene 16315 [Source:MGI Symbol;Acc:MGI:3826564]	Gm16315	0	0.193889	0.518744	0.710254	0.269088	0.699071		1.92311	0.0360037	0.00679191
	ENSMUSG00000017221	proteasome (prosome, macropain) 26S subunit, non-ATPase, 3 [Source:MGI Symbol;Acc:MGI:98858]	Psmd3	112.397	108.994	111.112	110.33	126.345	123.294		0.162518	0.0360917	0.00681811
	ENSMUSG00000018363	SMAD specific E3 ubiquitin protein ligase 2 [Source:MGI Symbol;Acc:MGI:1913563]	Smurf2	58.8877	55.5078	57.2813	69.1145	56.6403	67.2979		0.21757	0.0361075	0.00682583
	ENSMUSG00000090564	RIKEN cDNA A430057M04 gene [Source:MGI Symbol;Acc:MGI:2442125]	A430057M04Rik	0.485771	0.374212	0.46209	0.864667	0.619224	0.726509		0.726194	0.0361077	0.00683061
	ENSMUSG00000039232	syntaxin 11 [Source:MGI Symbol;Acc:MGI:1921982]	Stx11	12.1737	12.8767	10.0845	7.822	10.9127	8.99933		-0.374709	0.036189	0.00686765
	ENSMUSG00000025935	translocating chain-associating membrane protein 1 [Source:MGI Symbol;Acc:MGI:1919515]	Tram1	268.261	246.159	233.211	223.049	229.986	226.739		-0.137866	0.036189	0.00687259
	ENSMUSG00000030120	myeloid leukemia factor 2 [Source:MGI Symbol;Acc:MGI:1353554]	Mlf2	78.6182	76.3511	77.6049	79.8842	82.6671	85.7186		0.145011	0.036189	0.00687677
	ENSMUSG00000032431	cartilage associated protein [Source:MGI Symbol;Acc:MGI:1891221]	Crtap	33.9106	31.0141	36.6178	41.3017	39.2974	37.6242		0.227416	0.036189	0.006854
	ENSMUSG00000072692	ribosomal protein L37, retrotransposed [Source:MGI Symbol;Acc:MGI:3651519]	Rpl37rt	125.279	144.345	128.281	164.324	139.81	159.117		0.258089	0.036189	0.0068792
	ENSMUSG00000040269	mitochondrial ribosomal protein S28 [Source:MGI Symbol;Acc:MGI:1913480]	Mrps28	70.7936	60.4933	80.4054	80.8269	87.7227	81.6515		0.294788	0.036189	0.00687317
	ENSMUSG00000025507	p53 induced death domain protein 1 [Source:MGI Symbol;Acc:MGI:1889507]	Pidd1	33.1252	29.5382	27.1353	40.1621	28.617	39.2155		0.300991	0.036189	0.00687886
	ENSMUSG00000026814	endoglin [Source:MGI Symbol;Acc:MGI:95392]	Eng	0.632894	0.825081	0.677296	1.81346	1.19714	1.27107		0.90292	0.03621	0.00688793
	ENSMUSG00000021978	exostosin-like glycosyltransferase 3 [Source:MGI Symbol;Acc:MGI:1860765]	Extl3	28.3304	27.7438	28.1537	29.7739	29.7643	31.5802		0.166265	0.036231	0.00689667
	ENSMUSG00000040296	DEAD/H box helicase 58 [Source:MGI Symbol;Acc:MGI:2442858]	Ddx58	68.4014	66.7339	56.3318	52	53.4211	57.9361		-0.199389	0.036258	0.00691182
	ENSMUSG00000038733	WD repeat domain 26 [Source:MGI Symbol;Acc:MGI:1923825]	Wdr26	123.232	122.191	109.866	117.848	107.583	107.97		-0.123187	0.036258	0.00692536
	ENSMUSG00000091811	InaF motif containing 1 [Source:MGI Symbol;Acc:MGI:1913550]	Inafm1	15.9623	15.5125	17.0822	23.9083	16.6062	19.9169		0.325735	0.036258	0.00691696
	ENSMUSG00000070713	predicted pseudogene 10282 [Source:MGI Symbol;Acc:MGI:3704312]	Gm10282	1.31528	1.45088	2.7349	2.12595	2.28818	3.42405		0.956355	0.036258	0.00691023
	ENSMUSG00000036186	divergent protein kinase domain 1B [Source:MGI Symbol;Acc:MGI:1927576]	Dipk1b	0.846585	1.77812	1.72248	2.65037	1.65936	2.69707		0.984204	0.036258	0.00692558
	ENSMUSG00000040528	mast cell immunoglobulin like receptor 1 [Source:MGI Symbol;Acc:MGI:2685731]	Milr1	11.4852	11.6592	9.44024	8.3172	8.98481	8.45175		-0.367809	0.0362817	0.00696738
	ENSMUSG00000028035	DnaJ heat shock protein family (Hsp40) member B4 [Source:MGI Symbol;Acc:MGI:1914285]	Dnajb4	5.42072	5.3001	4.22859	4.86018	3.9543	3.88438		-0.341222	0.0362817	0.00697767
	ENSMUSG00000026027	STE20-related kinase adaptor beta [Source:MGI Symbol;Acc:MGI:2144047]	Stradb	6.11472	5.69096	5.17797	5.71764	4.73311	4.58659		-0.266801	0.0362817	0.00696741
	ENSMUSG00000044501	zinc finger protein 758 [Source:MGI Symbol;Acc:MGI:2385044]	Zfp758	24.9429	24.9622	19.5986	22.8884	18.4554	19.5464		-0.257794	0.0362817	0.00695456
	ENSMUSG00000020903	syntaxin 8 [Source:MGI Symbol;Acc:MGI:1890156]	Stx8	15.6804	15.0602	14.8681	12.1714	13.6095	12.9308		-0.219999	0.0362817	0.00695149
	ENSMUSG00000002342	transmembrane protein 161A [Source:MGI Symbol;Acc:MGI:2384577]	Tmem161a	21.5594	21.493	20.154	23.4685	21.7981	24.7979		0.199058	0.0362817	0.00697371
	ENSMUSG00000061650	mediator complex subunit 9 [Source:MGI Symbol;Acc:MGI:2183151]	Med9	32.8736	29.0978	32.7374	36.2642	34.9514	37.4038		0.250322	0.0362817	0.00695986
	ENSMUSG00000026857	N-terminal Xaa-Pro-Lys N-methyltransferase 1 [Source:MGI Symbol;Acc:MGI:1913867]	Ntmt1	14.3173	13.0763	18.5451	17.8486	19.1644	17.8415		0.340653	0.0362817	0.00697252
	ENSMUSG00000000881	discs large MAGUK scaffold protein 3 [Source:MGI Symbol;Acc:MGI:1888986]	Dlg3	1.25539	1.19498	1.32056	2.05551	1.31595	1.81708		0.505013	0.0362817	0.00693531
	ENSMUSG00000024883	Ras and Rab interactor 1 [Source:MGI Symbol;Acc:MGI:2385695]	Rin1	0.386564	0.377962	0.526682	0.6692	0.437128	0.840365		0.850369	0.0362817	0.0069565
	ENSMUSG00000053799	exocyst complex component 6 [Source:MGI Symbol;Acc:MGI:1351611]	Exoc6	61.8016	60.9453	56.2475	55.6416	53.9242	52.5625		-0.165312	0.0363763	0.00701018
	ENSMUSG00000020982	nuclear export mediator factor [Source:MGI Symbol;Acc:MGI:1918305]	Nemf	34.2878	33.3593	30.0811	30.1445	30.3291	29.4623		-0.140008	0.0363763	0.00700418
	ENSMUSG00000040410	F-box and leucine-rich repeat protein 4 [Source:MGI Symbol;Acc:MGI:2140367]	Fbxl4	7.78803	9.43347	8.52886	10.8941	9.87464	10.5785		0.327868	0.0363763	0.00700761
	ENSMUSG00000085667	predicted gene 12992 [Source:MGI Symbol;Acc:MGI:3702644]	Gm12992	1.42765	1.29248	1.729	1.78022	1.56058	2.4046		0.610825	0.0364045	0.0070208
	ENSMUSG00000001911	nuclear factor I/X [Source:MGI Symbol;Acc:MGI:97311]	Nfix	0.998029	0.950005	0.759751	2.19395	1.37579	1.34032		0.630227	0.0364045	0.00702515
	ENSMUSG00000021583	endoplasmic reticulum aminopeptidase 1 [Source:MGI Symbol;Acc:MGI:1933403]	Erap1	199.969	184.931	166.32	156.587	182.304	163.776		-0.160603	0.0364859	0.00704564
	ENSMUSG00000031148	G patch domain and KOW motifs [Source:MGI Symbol;Acc:MGI:1859610]	Gpkow	74.9759	78.2027	69.5892	67.8605	69.2923	66.1769		-0.148936	0.0365083	0.00705475
	ENSMUSG00000022765	synaptosomal-associated protein 29 [Source:MGI Symbol;Acc:MGI:1914724]	Snap29	66.6215	65.7556	64.5441	56.1775	61.0022	58.8184		-0.142227	0.0365403	0.00707051
	ENSMUSG00000095567	NOC2 like nucleolar associated transcriptional repressor [Source:MGI Symbol;Acc:MGI:1931051]	Noc2l	224.927	221.409	229.768	248.172	250.024	237.318		0.125757	0.0365403	0.00706643
	ENSMUSG00000032373	carbonic anhydrase 12 [Source:MGI Symbol;Acc:MGI:1923709]	Car12	7.18919	7.91348	9.39655	8.74052	9.06905	9.59722		0.291033	0.0366733	0.00710107
	ENSMUSG00000028980	hexose-6-phosphate dehydrogenase (glucose 1-dehydrogenase) [Source:MGI Symbol;Acc:MGI:2140356]	H6pd	36.1857	35.1413	32.678	36.4946	36.2963	40.1435		0.169358	0.0367933	0.00712912
	ENSMUSG00000027433	5'-3' exoribonuclease 2 [Source:MGI Symbol;Acc:MGI:894687]	Xrn2	324.318	324.146	288.793	310.823	292.466	283.6		-0.121339	0.0368185	0.00713884
	ENSMUSG00000028175	DEP domain containing 1a [Source:MGI Symbol;Acc:MGI:1923381]	Depdc1a	31.1895	31.9346	30.6497	23.2627	27.1692	27.6075		-0.197839	0.0370685	0.00719217
	ENSMUSG00000117327	predicted gene 6467 [Source:MGI Symbol;Acc:MGI:3645284]	Gm6467	8.22243	10.47	9.50414	11.3235	14.3578	13.6618		0.563538	0.037183	0.00721925
	ENSMUSG00000037972	stannin [Source:MGI Symbol;Acc:MGI:1276549]	Snn	2.98294	2.8654	2.39572	1.46202	2.13039	1.95556		-0.541065	0.0372181	0.00724051
	ENSMUSG00000079179	RAB10, member RAS oncogene family, opposite strand [Source:MGI Symbol;Acc:MGI:1921423]	Rab10os	12.8697	13.5408	11.6022	15.0437	13.1342	15.4305		0.236251	0.0372181	0.0072407
	ENSMUSG00000069862	ribosomal protein S12, pseudogene 9 [Source:MGI Symbol;Acc:MGI:3704324]	Rps12-ps9	5.2535	5.70733	5.34443	11.1504	9.24105	9.05429		0.781019	0.0372181	0.00723674
	ENSMUSG00000026843	far upstream element (FUSE) binding protein 3 [Source:MGI Symbol;Acc:MGI:2443699]	Fubp3	16.8555	16.5574	15.6077	22.4558	16.7267	18.8813		0.214627	0.0372604	0.00725866
	ENSMUSG00000047281	stratifin [Source:MGI Symbol;Acc:MGI:1891831]	Sfn	98.0425	85.5547	89.1423	109.088	98.4249	106.624		0.224295	0.0372604	0.00725871
	ENSMUSG00000003161	sorcin [Source:MGI Symbol;Acc:MGI:98419]	Sri	157.086	156.946	151.102	129.954	135.854	142.958		-0.134191	0.0373426	0.00727962
	ENSMUSG00000051590	mitogen-activated protein kinase kinase kinase 19 [Source:MGI Symbol;Acc:MGI:1203481]	Map3k19	0.239659	0.142016	0.0569939	0.0624279	0.0591289	0.0204817		-2.07612	0.0373475	0.00729116
	ENSMUSG00000107868	predicted gene 5112 [Source:MGI Symbol;Acc:MGI:3779460]	Gm5112	1.52451	1.85922	0.771873	1.08032	1.06772	0.647231		-0.917902	0.0373475	0.0073036
	ENSMUSG00000024588	ferrochelatase [Source:MGI Symbol;Acc:MGI:95513]	Fech	6.28632	6.04495	5.7824	5.05571	5.40519	5.30047		-0.186993	0.0373475	0.00730768
	ENSMUSG00000024277	microtubule-associated protein, RP/EB family, member 2 [Source:MGI Symbol;Acc:MGI:106271]	Mapre2	43.4328	45.0593	39.1565	35.4435	38.9814	38.1369		-0.171539	0.0373475	0.00730047
	ENSMUSG00000021288	kinesin light chain 1 [Source:MGI Symbol;Acc:MGI:107978]	Klc1	41.3952	40.3486	38.6843	45.4004	42.7691	43.5487		0.128365	0.0373475	0.00729844
	ENSMUSG00000002763	peroxisomal biogenesis factor 6 [Source:MGI Symbol;Acc:MGI:2385054]	Pex6	13.7436	12.8379	12.2784	20.9501	14.681	15.3714		0.290746	0.0373475	0.00730995
	ENSMUSG00000035105	egl-9 family hypoxia-inducible factor 3 [Source:MGI Symbol;Acc:MGI:1932288]	Egln3	22.0044	18.0786	24.4133	23.4819	27.6232	27.1425		0.380074	0.0374857	0.00734833
	ENSMUSG00000047604	frequently rearranged in advanced T cell lymphomas 2 [Source:MGI Symbol;Acc:MGI:2673967]	Frat2	16.2743	20.1624	14.9896	43.4403	20.4261	22.898		0.508794	0.0374857	0.00735175
	ENSMUSG00000003934	ephrin B3 [Source:MGI Symbol;Acc:MGI:109196]	Efnb3	0.585372	0.572346	0.446629	0.943479	0.728135	1.13499		0.882449	0.0374857	0.00734613
	ENSMUSG00000113902	NADH:ubiquinone oxidoreductase subunit B1 [Source:MGI Symbol;Acc:MGI:3780865]	Ndufb1	194.222	196.319	241.399	155.214	192.788	163.88		-0.248272	0.0374952	0.00735852
	ENSMUSG00000061728	butyrophilin-like 7, pseudogene [Source:MGI Symbol;Acc:MGI:2388054]	Btnl7-ps	1.91556	2.15279	0.518377	0.504711	0.478039	0.745147		-1.23579	0.0375008	0.00736453
	ENSMUSG00000095193	predicted gene, 20939 [Source:MGI Symbol;Acc:MGI:5434295]	Gm20939	4.25933	4.2249	4.79058	3.65544	4.32784	2.75645		-0.465011	0.0375196	0.00737313
	ENSMUSG00000004264	prohibitin 2 [Source:MGI Symbol;Acc:MGI:102520]	Phb2	191.498	191.545	215.078	213.387	225.6	212.412		0.162393	0.0375703	0.00738804
	ENSMUSG00000095159	tubulin, beta 4B class IVB, pseudogene 1 [Source:MGI Symbol;Acc:MGI:3642800]	Tubb4b-ps1	2.09196	1.70451	1.97616	1.99807	3.23298	3.52351		0.754954	0.0375948	0.00739779
	ENSMUSG00000064370	mitochondrially encoded cytochrome b [Source:MGI Symbol;Acc:MGI:102501]	mt-Cytb	8098.44	9460.29	9239.19	7588.24	7392.5	7414.8		-0.223235	0.0375962	0.00740458
	ENSMUSG00000006699	cell division cycle 42 [Source:MGI Symbol;Acc:MGI:106211]	Cdc42	937.706	929.213	935.261	774.643	886.684	830.877		-0.142493	0.0375962	0.00740791
	ENSMUSG00000022900	immunoglobulin-like domain containing receptor 1 [Source:MGI Symbol;Acc:MGI:2146574]	Ildr1	2.16858	3.28649	1.93823	0.828497	1.4223	1.68187		-0.702244	0.0376027	0.00741413
	ENSMUSG00000034560	WASH complex subunit 4 [Source:MGI Symbol;Acc:MGI:2441787]	Washc4	57.4051	56.414	49.4233	52.9316	48.5105	49.2438		-0.145881	0.0376216	0.00742771
	ENSMUSG00000007050	LSM2 homolog, U6 small nuclear RNA and mRNA degradation associated [Source:MGI Symbol;Acc:MGI:90676]	Lsm2	45.4431	43.7816	47.615	43.8975	51.4039	51.9587		0.191296	0.0376216	0.00742735
	ENSMUSG00000051238	SWIM type zinc finger 7 associated protein 1 [Source:MGI Symbol;Acc:MGI:1914212]	Swsap1	16.7899	16.1892	15.4139	14.7655	14.845	12.091		-0.323901	0.037673	0.00744281
	ENSMUSG00000083621	predicted gene 14586 [Source:MGI Symbol;Acc:MGI:3705507]	Gm14586	43.9551	64.3725	49.2788	63.246	53.4486	75.6662		0.455816	0.0379785	0.00750813
	ENSMUSG00000031691	transportin 2 (importin 3, karyopherin beta 2b) [Source:MGI Symbol;Acc:MGI:2384849]	Tnpo2	74.5037	71.8131	71.0567	83.7954	74.2883	80.2813		0.150873	0.0379932	0.00751602
	ENSMUSG00000034881	thromboxane A2 receptor [Source:MGI Symbol;Acc:MGI:98496]	Tbxa2r	53.766	49.4447	47.3591	61.7856	58.3558	58.3598		0.225671	0.0380406	0.00753039
	ENSMUSG00000022568	scribbled planar cell polarity [Source:MGI Symbol;Acc:MGI:2145950]	Scrib	29.799	29.0359	25.9369	32.9954	29.9291	33.8502		0.217311	0.0380773	0.00754265
	ENSMUSG00000032187	SWI/SNF related, matrix associated, actin dependent regulator of chromatin, subfamily a, member 4 [Source:MGI Symbol;Acc:MGI:88192]	Smarca4	157.494	148.11	146.067	166.83	167.011	161.955		0.128892	0.0380876	0.00754968
	ENSMUSG00000040229	G protein-coupled receptor 34 [Source:MGI Symbol;Acc:MGI:1346334]	Gpr34	137.124	126.101	132.542	70.4607	123.393	105.965		-0.330609	0.0381717	0.00757635
	ENSMUSG00000061111	MAPK regulated corepressor interacting protein 1 [Source:MGI Symbol;Acc:MGI:2384752]	Mcrip1	125.082	122.565	130.534	149.66	134.602	138.679		0.178468	0.0381717	0.00757275
	ENSMUSG00000021880	ribonuclease, RNase A family, 6 [Source:MGI Symbol;Acc:MGI:1925666]	Rnase6	1.13527	1.08155	0.418817	0.250227	0.434506	0.328383		-1.43124	0.0381907	0.00758513
	ENSMUSG00000024959	BCL2-associated agonist of cell death [Source:MGI Symbol;Acc:MGI:1096330]	Bad	14.659	15.4901	17.9826	17.7405	18.3679	18.8307		0.286217	0.0382484	0.00760161
	ENSMUSG00000083027	predicted gene 13140 [Source:MGI Symbol;Acc:MGI:3649297]	Gm13140	0.55436	0.963598	0.64452	0.564777	0.434631	0.208457		-1.30235	0.0382771	0.00761511
	ENSMUSG00000022656	nectin cell adhesion molecule 3 [Source:MGI Symbol;Acc:MGI:1930171]	Nectin3	0.100493	0.0595492	0.135424	0.235592	0.264465	0.206118		1.29794	0.0382771	0.00761734
	ENSMUSG00000068742	cryptochrome 2 (photolyase-like) [Source:MGI Symbol;Acc:MGI:1270859]	Cry2	6.41226	6.70195	6.15371	8.76431	6.51757	8.07202		0.301245	0.0383524	0.00763737
	ENSMUSG00000001053	NEDD4 binding protein 3 [Source:MGI Symbol;Acc:MGI:2442218]	N4bp3	17.1178	15.1926	18.872	19.8151	19.1928	20.7873		0.311329	0.038369	0.00764569
	ENSMUSG00000066724	predicted gene 10175 [Source:MGI Symbol;Acc:MGI:3704287]	Gm10175	7.40241	9.41487	9.13111	14.4852	9.63648	12.7296		0.572711	0.0384079	0.00765849
	ENSMUSG00000027605	acyl-CoA synthetase short-chain family member 2 [Source:MGI Symbol;Acc:MGI:1890410]	Acss2	8.7199	9.23168	7.77343	6.69784	7.8262	6.87246		-0.296877	0.038477	0.0076827
	ENSMUSG00000017707	serine incorporator 3 [Source:MGI Symbol;Acc:MGI:1349457]	Serinc3	648.859	624.26	546.223	499.27	593.268	549.625		-0.155184	0.038477	0.00769218
	ENSMUSG00000032328	transmembrane protein 30A [Source:MGI Symbol;Acc:MGI:106402]	Tmem30a	129.839	130.223	119.385	113.866	112.681	114.942		-0.143276	0.038477	0.00769244
	ENSMUSG00000058997	von Willebrand factor A domain containing 8 [Source:MGI Symbol;Acc:MGI:1919008]	Vwa8	8.81756	8.54026	8.83762	10.7362	10.1272	9.54513		0.188944	0.038477	0.00768608
	ENSMUSG00000035868	zinc finger protein 983 [Source:MGI Symbol;Acc:MGI:1920479]	Zfp983	11.902	11.1229	9.95851	10.0139	9.79925	8.90078		-0.272792	0.0385931	0.00772794
	ENSMUSG00000029141	solute carrier family 4 (anion exchanger), member 1, adaptor protein [Source:MGI Symbol;Acc:MGI:1196608]	Slc4a1ap	30.9746	28.8956	27.7076	26.6694	29.9595	24.2146		-0.198281	0.0385931	0.00773083
	ENSMUSG00000020284	cilia and flagella associated protein 410 [Source:MGI Symbol;Acc:MGI:1915134]	Cfap410	1.88025	2.4054	2.17584	3.12177	2.464	2.77527		0.407711	0.0385931	0.00772184
	ENSMUSG00000044551	RIKEN cDNA 9930012K11 gene [Source:MGI Symbol;Acc:MGI:2145726]	9930012K11Rik	9.22441	10.207	9.61296	6.27471	9.0368	7.27574		-0.355964	0.0386371	0.00774976
	ENSMUSG00000052565	H1.3 linker histone, cluster member [Source:MGI Symbol;Acc:MGI:107502]	H1f3	0.235258	0.163572	0.396604	0.479357	0.283765	0.855155		1.53174	0.0386371	0.00774735
	ENSMUSG00000021665	hexosaminidase B [Source:MGI Symbol;Acc:MGI:96074]	Hexb	128.428	126.725	117.793	105.799	113.197	113.438		-0.142747	0.0388342	0.00779439
	ENSMUSG00000028158	microsomal triglyceride transfer protein [Source:MGI Symbol;Acc:MGI:106926]	Mttp	0.863167	0.709415	0.687215	0.663125	0.628082	0.352802		-0.839414	0.0388517	0.00781513
	ENSMUSG00000069793	schlafen 9 [Source:MGI Symbol;Acc:MGI:2445121]	Slfn9	24.6376	23.5421	17.9596	16.3902	20.9989	18.9218		-0.259713	0.0388517	0.00783356
	ENSMUSG00000013736	tRNA nucleotidyl transferase, CCA-adding, 1 [Source:MGI Symbol;Acc:MGI:1917297]	Trnt1	58.0547	58.5518	61.1152	53.1303	54.0705	51.3759		-0.15184	0.0388517	0.00781365
	ENSMUSG00000027479	microtubule-associated protein, RP/EB family, member 1 [Source:MGI Symbol;Acc:MGI:891995]	Mapre1	140.918	135.625	133.109	113.817	134.642	120.701		-0.149322	0.0388517	0.00783263
	ENSMUSG00000025647	shisa family member 5 [Source:MGI Symbol;Acc:MGI:1915044]	Shisa5	1186.53	1189.65	995.484	1024.61	1032.42	1046.57		-0.129499	0.0388517	0.0078285
	ENSMUSG00000057177	glycogen synthase kinase 3 alpha [Source:MGI Symbol;Acc:MGI:2152453]	Gsk3a	150.706	147.993	136.945	164.576	153.663	159.116		0.130115	0.0388517	0.00781978
	ENSMUSG00000104960	small nucleolar RNA host gene 8 [Source:MGI Symbol;Acc:MGI:1917145]	Snhg8	54.4719	56.0629	68.5691	80.9744	70.1496	71.3574		0.357912	0.0388517	0.00781235
	ENSMUSG00000030400	excision repair cross-complementing rodent repair deficiency, complementation group 2 [Source:MGI Symbol;Acc:MGI:95413]	Ercc2	35.7456	35.0594	33.8968	46.0106	35.596	39.3006		0.185772	0.0388598	0.00784028
	ENSMUSG00000064326	SIVA1, apoptosis-inducing factor [Source:MGI Symbol;Acc:MGI:1353606]	Siva1	38.4967	36.699	42.9675	45.7312	45.97	43.2922		0.215329	0.0389068	0.00785488
	ENSMUSG00000035692	ISG15 ubiquitin-like modifier [Source:MGI Symbol;Acc:MGI:1855694]	Isg15	16.3994	19.6517	21.5222	6.48685	19.4811	10.2778		-0.733423	0.0389681	0.00787235
	ENSMUSG00000074529	zinc finger protein 972 [Source:MGI Symbol;Acc:MGI:1925953]	Zfp972	2.42609	3.51423	1.17528	2.05974	1.34124	0.633533		-1.46844	0.0390164	0.00789234
	ENSMUSG00000030733	SH2B adaptor protein 1 [Source:MGI Symbol;Acc:MGI:1201407]	Sh2b1	95.6913	97.0271	89.8454	118.892	86.1377	115.071		0.229081	0.0390164	0.00789101
	ENSMUSG00000062866	phosphatase and actin regulator 2 [Source:MGI Symbol;Acc:MGI:2446138]	Phactr2	3.26689	3.12927	1.91937	1.99773	2.57693	2.08799		-0.426147	0.0392164	0.00794757
	ENSMUSG00000022378	CYFIP related Rac1 interactor B [Source:MGI Symbol;Acc:MGI:1923520]	Cyrib	95.1049	92.7225	92.1212	78.2537	86.2575	84.5425		-0.134182	0.0392164	0.00794317
	ENSMUSG00000024429	guanine nucleotide binding protein-like 1 [Source:MGI Symbol;Acc:MGI:95764]	Gnl1	64.0735	65.9657	63.329	75.6928	72.9253	69.698		0.156084	0.0392164	0.00794823
	ENSMUSG00000029364	WD repeat and SOCS box-containing 2 [Source:MGI Symbol;Acc:MGI:2144041]	Wsb2	23.4814	22.1359	20.3539	16.5975	19.6774	17.8875		-0.294476	0.0392358	0.00795731
	ENSMUSG00000020973	dynein, axonemal assembly factor 2 [Source:MGI Symbol;Acc:MGI:1923566]	Dnaaf2	3.95045	4.20962	3.68435	3.54347	2.95223	2.9387		-0.385319	0.0392565	0.00797232
	ENSMUSG00000028771	protein tyrosine phosphatase, non-receptor type 12 [Source:MGI Symbol;Acc:MGI:104673]	Ptpn12	66.6391	65.5023	61.349	58.4498	59.1738	58.3407		-0.137192	0.0392565	0.0079853
	ENSMUSG00000026842	c-abl oncogene 1, non-receptor tyrosine kinase [Source:MGI Symbol;Acc:MGI:87859]	Abl1	34.3854	34.2094	30.1848	41.5802	32.8236	38.216		0.184591	0.0392565	0.00798614
	ENSMUSG00000024955	estrogen related receptor, alpha [Source:MGI Symbol;Acc:MGI:1346831]	Esrra	15.3546	16.5091	16.9317	17.7901	17.0886	19.1965		0.238553	0.0392565	0.00799238
	ENSMUSG00000032583	MON1 homolog A, secretory traffciking associated [Source:MGI Symbol;Acc:MGI:1920075]	Mon1a	20.3977	21.1123	20.8766	24.4807	22.1432	24.7925		0.248361	0.0392565	0.00798876
	ENSMUSG00000014592	calmodulin binding transcription activator 1 [Source:MGI Symbol;Acc:MGI:2140230]	Camta1	2.17399	2.14646	2.37657	2.76347	2.40052	2.62228		0.263501	0.0392565	0.00798037
	ENSMUSG00000030347	DNA segment, Chr 6, Wayne State University 163, expressed [Source:MGI Symbol;Acc:MGI:107893]	D6Wsu163e	19.5003	19.4244	17.7074	17.4938	18.4483	15.6046		-0.212184	0.03938	0.00802268
	ENSMUSG00000047264	zinc finger protein 358 [Source:MGI Symbol;Acc:MGI:2153740]	Zfp358	12.1433	12.1205	10.9196	19.8892	14.5041	14.002		0.3258	0.0395433	0.00806114
	ENSMUSG00000025597	kelch-like 4 [Source:MGI Symbol;Acc:MGI:2442829]	Klhl4	0.357416	0.381232	0.339992	0.558611	0.676061	0.641452		0.796288	0.0395737	0.00807252
	ENSMUSG00000002325	interferon regulatory factor 9 [Source:MGI Symbol;Acc:MGI:107587]	Irf9	54.8101	55.19	45.8137	50.161	47.7058	45.9362		-0.170529	0.0395972	0.0080825
	ENSMUSG00000046079	leucine rich repeat containing 8D [Source:MGI Symbol;Acc:MGI:1922368]	Lrrc8d	11.8555	11.3502	10.572	14.2604	11.9399	12.5644		0.166745	0.039608	0.0080899
	ENSMUSG00000029780	5'-nucleotidase, cytosolic III [Source:MGI Symbol;Acc:MGI:1927186]	Nt5c3	38.717	39.8648	40.4982	37.5812	36.909	32.7908		-0.190055	0.0396938	0.00811264
	ENSMUSG00000030107	ubiquitin specific peptidase 18 [Source:MGI Symbol;Acc:MGI:1344364]	Usp18	2.79653	2.93835	1.96537	0.757451	2.15227	1.56953		-0.796881	0.0397947	0.00813847
	ENSMUSG00000029138	RIKEN cDNA 4930548H24 gene [Source:MGI Symbol;Acc:MGI:1914906]	4930548H24Rik	0.553118	0.22187	0.259704	0.284465	0.153961	0.079996		-1.53573	0.0398498	0.00816541
	ENSMUSG00000043439	elongin BC and polycomb repressive complex 2 associated protein [Source:MGI Symbol;Acc:MGI:2143991]	Epop	28.2324	26.6365	34.6233	36.4824	36.239	33.9683		0.298568	0.0398498	0.00815958
	ENSMUSG00000071052	ribosomal protein L7A, pseudogene 5 [Source:MGI Symbol;Acc:MGI:3643553]	Rpl7a-ps5	11.7629	13.8014	13.0777	21.9081	12.7694	23.0837		0.72231	0.0398498	0.00816307
	ENSMUSG00000013033	adhesion G protein-coupled receptor L1 [Source:MGI Symbol;Acc:MGI:1929461]	Adgrl1	23.1088	23.8321	22.2671	31.1256	25.7512	27.7543		0.279911	0.0398749	0.00817577
	ENSMUSG00000029512	unc-51 like kinase 1 [Source:MGI Symbol;Acc:MGI:1270126]	Ulk1	24.6439	24.2885	21.395	31.0465	23.7715	27.4868		0.206481	0.0398894	0.00818399
	ENSMUSG00000064367	mitochondrially encoded NADH dehydrogenase 5 [Source:MGI Symbol;Acc:MGI:102496]	mt-Nd5	4231.56	4410.62	4347.53	3971.08	3466.32	3704.55		-0.203646	0.0399192	0.00819533
	ENSMUSG00000086742	predicted gene 16201 [Source:MGI Symbol;Acc:MGI:3802153]	Gm16201	2.04774	1.3129	1.1416	0.737444	1.60952	0.694275		-0.928989	0.0399401	0.0082137
	ENSMUSG00000074923	p21 (RAC1) activated kinase 6 [Source:MGI Symbol;Acc:MGI:2679420]	Pak6	12.8721	11.2455	11.3801	5.99778	11.2403	8.50839		-0.467715	0.0399401	0.00822917
	ENSMUSG00000055541	leukocyte-associated Ig-like receptor 1 [Source:MGI Symbol;Acc:MGI:105492]	Lair1	9.08252	8.50976	9.84877	5.99652	8.24462	7.16161		-0.30314	0.0399401	0.00823103
	ENSMUSG00000032867	F-box and WD-40 domain protein 8 [Source:MGI Symbol;Acc:MGI:1923041]	Fbxw8	52.7988	47.2618	49.072	53.1669	57.0309	54.3707		0.151804	0.0399401	0.00822297
	ENSMUSG00000019158	transmembrane protein 160 [Source:MGI Symbol;Acc:MGI:1916344]	Tmem160	65.9414	65.5056	86.5943	88.6783	82.441	84.0586		0.313501	0.0399401	0.00822283
	ENSMUSG00000033883	zinc finger protein 267 [Source:MGI Symbol;Acc:MGI:1098769]	Zfp267	3.52783	3.77305	3.07619	5.51222	3.98153	4.26629		0.32229	0.0399401	0.0082176
	ENSMUSG00000062691	CCAAT/enhancer binding protein (C/EBP), zeta, opposite strand [Source:MGI Symbol;Acc:MGI:1915804]	Cebpzos	31.5071	35.7054	36.9007	27.3393	32.6942	25.1666		-0.325937	0.0399706	0.00824256
	ENSMUSG00000057367	baculoviral IAP repeat-containing 2 [Source:MGI Symbol;Acc:MGI:1197009]	Birc2	52.3019	53.4004	45.9166	47.5745	45.5204	44.5547		-0.173757	0.0400773	0.00827508
	ENSMUSG00000028799	zinc finger protein 362 [Source:MGI Symbol;Acc:MGI:2652839]	Zfp362	50.824	49.892	48.8091	73.0693	53.1917	56.7101		0.229739	0.0400773	0.00827323
	ENSMUSG00000020733	solute carrier family 9 (sodium/hydrogen exchanger), member 3 regulator 1 [Source:MGI Symbol;Acc:MGI:1349482]	Slc9a3r1	494.787	459.624	465.257	485.175	487.61	545.269		0.171528	0.0402119	0.00830814
	ENSMUSG00000026385	diazepam binding inhibitor [Source:MGI Symbol;Acc:MGI:94865]	Dbi	234.789	229.324	251.575	155.341	230.106	197.239		-0.236207	0.0402146	0.00831538
	ENSMUSG00000085208	BRCA1 interacting protein C-terminal helicase 1, opposite strand [Source:MGI Symbol;Acc:MGI:1921288]	Brip1os	76.7927	74.3888	60.4452	60.029	69.47	61.8637		-0.194843	0.0402146	0.00831924
	ENSMUSG00000022426	Josephin domain containing 1 [Source:MGI Symbol;Acc:MGI:1921408]	Josd1	43.9067	42.7641	41.5918	52.9616	44.9872	46.7495		0.152677	0.0402419	0.00833017
	ENSMUSG00000027509	ribonucleic acid export 1 [Source:MGI Symbol;Acc:MGI:1913929]	Rae1	99.8555	102.537	101.067	115.668	105.719	108.574		0.130107	0.0402779	0.0083429
	ENSMUSG00000117725	predicted gene, 50240 [Source:MGI Symbol;Acc:MGI:6303048]	Gm50240	1.09145	1.25407	1.27434	2.63267	1.43923	1.66951		0.564665	0.0403359	0.00836019
	ENSMUSG00000039483	ankyrin repeat and SOCS box-containing 6 [Source:MGI Symbol;Acc:MGI:1919573]	Asb6	27.2129	27.1866	29.0873	33.701	28.4918	31.2986		0.198703	0.0404025	0.00837929
	ENSMUSG00000020740	golgi associated, gamma adaptin ear containing, ARF binding protein 3 [Source:MGI Symbol;Acc:MGI:2384159]	Gga3	28.5491	30.1685	26.4064	34.8905	27.7498	33.7276		0.207712	0.0404326	0.00839379
	ENSMUSG00000041272	thymocyte selection-associated high mobility group box [Source:MGI Symbol;Acc:MGI:2181659]	Tox	7.66759	5.9058	6.80609	13.7114	7.72561	8.47424		0.396114	0.0404326	0.00839615
	ENSMUSG00000040455	ubiquitin specific petidase 45 [Source:MGI Symbol;Acc:MGI:101850]	Usp45	20.4811	19.9949	16.9295	17.0608	16.6499	17.0208		-0.192033	0.040446	0.00840423
	ENSMUSG00000074361	complement component 5a receptor 2 [Source:MGI Symbol;Acc:MGI:2442013]	C5ar2	0.0654044	0.0852653	0.0285156	0	0.0295838	0		-2.12168	0.0405223	0.00843339
	ENSMUSG00000009585	apolipoprotein B mRNA editing enzyme, catalytic polypeptide 3 [Source:MGI Symbol;Acc:MGI:1933111]	Apobec3	98.2099	93.7321	80.5243	77.7545	83.953	83.5823		-0.151208	0.0405223	0.00842795
	ENSMUSG00000031696	VPS35 retromer complex component [Source:MGI Symbol;Acc:MGI:1890467]	Vps35	76.514	77.4002	73.8389	70.1801	72.1655	68.3247		-0.121472	0.0405223	0.00843624
	ENSMUSG00000053398	3-phosphoglycerate dehydrogenase [Source:MGI Symbol;Acc:MGI:1355330]	Phgdh	215.245	210.806	245.569	234.039	270.404	240.307		0.188998	0.0405223	0.00844134
	ENSMUSG00000062083	ribosomal protein 13A, pseudogene 1 [Source:MGI Symbol;Acc:MGI:3648883]	Rpl13a-ps1	1.71254	2.48063	2.65475	3.45309	2.75419	5.18752		1.04329	0.0405823	0.00845915
	ENSMUSG00000026126	protein tyrosine phosphatase, non-receptor type 18 [Source:MGI Symbol;Acc:MGI:108410]	Ptpn18	35.1582	36.9014	52.6178	46.7724	45.8585	46.4575		0.302871	0.0406528	0.0084845
	ENSMUSG00000075514	predicted gene 13375 [Source:MGI Symbol;Acc:MGI:3649913]	Gm13375	4.63628	4.79977	4.16165	7.81445	7.03142	6.79409		0.605205	0.0406528	0.00848326
	ENSMUSG00000024480	adaptor-related protein complex 3, sigma 1 subunit [Source:MGI Symbol;Acc:MGI:1337062]	Ap3s1	62.231	56.3215	56.5498	51.6488	50.1929	52.3415		-0.163408	0.0406698	0.00849339
	ENSMUSG00000042292	myocardin related transcription factor A [Source:MGI Symbol;Acc:MGI:2384495]	Mrtfa	88.6497	81.7355	75.3398	90.6297	83.1824	93.5845		0.149362	0.0406932	0.00850361
	ENSMUSG00000026070	interleukin 18 receptor 1 [Source:MGI Symbol;Acc:MGI:105383]	Il18r1	160.427	147.718	128.907	134.57	134.041	117.27		-0.275028	0.0407156	0.00851362
	ENSMUSG00000022899	solute carrier family 15 (H+/peptide transporter), member 2 [Source:MGI Symbol;Acc:MGI:1890457]	Slc15a2	8.14741	7.34222	1.58641	2.46295	0	1.6062		-3.14462	0.040886	0.00857564
	ENSMUSG00000042229	RAB interacting factor [Source:MGI Symbol;Acc:MGI:2138605]	Rabif	65.0034	66.2233	59.0951	56.4876	58.1789	57.2053		-0.148625	0.040886	0.00858141
	ENSMUSG00000039615	STIP1 homology and U-Box containing protein 1 [Source:MGI Symbol;Acc:MGI:1891731]	Stub1	53.1107	54.0629	54.4794	62.9309	58.2067	58.9478		0.165285	0.040886	0.00857061
	ENSMUSG00000020536	LLGL1 scribble cell polarity complex component [Source:MGI Symbol;Acc:MGI:102682]	Llgl1	47.5918	43.4961	44.2141	48.2237	50.5505	51.0221		0.177346	0.040886	0.00856006
	ENSMUSG00000063236	RIKEN cDNA 1110038F14 gene [Source:MGI Symbol;Acc:MGI:2152337]	1110038F14Rik	47.4076	45.4811	48.8642	50.5044	50.9695	53.2517		0.183756	0.040886	0.00857478
	ENSMUSG00000059713	regulator of calcineurin 3 [Source:MGI Symbol;Acc:MGI:1858220]	Rcan3	38.6428	38.8819	36.815	42.4142	38.462	44.4024		0.186297	0.040886	0.00857674
	ENSMUSG00000078794	dishevelled-binding antagonist of beta-catenin 3 [Source:MGI Symbol;Acc:MGI:3654828]	Dact3	0.116881	0.203165	0.135891	0.22327	0.352452	0.476136		1.36766	0.0409098	0.00859177
	ENSMUSG00000027068	dehydrogenase/reductase (SDR family) member 9 [Source:MGI Symbol;Acc:MGI:2442798]	Dhrs9	0.217617	0.070925	0.118599	0.0519625	0.0246083	0.0255722		-1.82371	0.0410552	0.00862769
	ENSMUSG00000062585	cannabinoid receptor 2 (macrophage) [Source:MGI Symbol;Acc:MGI:104650]	Cnr2	8.59795	11.552	7.03822	5.19538	6.82566	7.23049		-0.408395	0.041218	0.00867146
	ENSMUSG00000020638	cytidine monophosphate (UMP-CMP) kinase 2, mitochondrial [Source:MGI Symbol;Acc:MGI:99830]	Cmpk2	11.3012	11.6697	8.53723	6.4924	10.1729	8.12578		-0.386695	0.041218	0.00867271
	ENSMUSG00000071451	proteasome (prosome, macropain) assembly chaperone 4 [Source:MGI Symbol;Acc:MGI:1916916]	Psmg4	93.162	83.7033	115.815	104.211	108.575	115.787		0.302704	0.0412793	0.00869403
	ENSMUSG00000040721	zinc finger homeobox 2 [Source:MGI Symbol;Acc:MGI:2686934]	Zfhx2	1.66672	1.35385	1.30242	1.92254	1.67016	1.88022		0.338078	0.0412793	0.00869643
	ENSMUSG00000039148	squamous cell carcinoma antigen recognized by T cells 1 [Source:MGI Symbol;Acc:MGI:1309453]	Sart1	83.4031	78.9941	74.842	86.8397	83.1967	88.8669		0.149298	0.0412874	0.00870354
	ENSMUSG00000017830	DEXH (Asp-Glu-X-His) box polypeptide 58 [Source:MGI Symbol;Acc:MGI:1931560]	Dhx58	17.3682	15.7754	15.2378	14.7191	13.3295	13.5839		-0.240453	0.0412954	0.00872148
	ENSMUSG00000037553	zinc finger, DHHC domain containing 18 [Source:MGI Symbol;Acc:MGI:3527792]	Zdhhc18	150.423	148.768	133.562	180.747	141.521	165.88		0.172691	0.0412954	0.00872137
	ENSMUSG00000068205	mono-ADP ribosylhydrolase 2 [Source:MGI Symbol;Acc:MGI:1920149]	Macrod2	0.135568	0.103095	0.167467	0.205014	0.2555	0.254888		0.950696	0.0412954	0.00871726
	ENSMUSG00000019461	phospholipid scramblase 3 [Source:MGI Symbol;Acc:MGI:1917560]	Plscr3	10.8388	9.74161	10.2254	16.5355	11.1439	12.4846		0.317477	0.0414351	0.00875641
	ENSMUSG00000020190	MAP kinase-interacting serine/threonine kinase 2 [Source:MGI Symbol;Acc:MGI:894279]	Mknk2	412.401	395.764	368.293	425.27	402.607	448.531		0.156754	0.0414567	0.00876642
	ENSMUSG00000045928	RIKEN cDNA 4933440M02 gene [Source:MGI Symbol;Acc:MGI:1918458]	4933440M02Rik	3.56086	3.36157	2.76238	2.7912	2.19938	2.14701		-0.560455	0.041786	0.00884409
	ENSMUSG00000021549	RAS p21 protein activator 1 [Source:MGI Symbol;Acc:MGI:97860]	Rasa1	104.728	100.899	85.938	97.6112	87.3438	85.0372		-0.181143	0.041786	0.00885248
	ENSMUSG00000030161	gamma-aminobutyric acid (GABA) A receptor-associated protein-like 1 [Source:MGI Symbol;Acc:MGI:1914980]	Gabarapl1	73.8748	84.3919	89.5889	106.142	89.6478	89.9508		0.216711	0.041786	0.00885081
	ENSMUSG00000037885	serine/threonine kinase 35 [Source:MGI Symbol;Acc:MGI:1914583]	Stk35	21.0348	20.2665	18.9484	21.6706	19.284	24.6693		0.211866	0.0418022	0.0088614
	ENSMUSG00000067577	RIKEN cDNA A430093F15 gene [Source:MGI Symbol;Acc:MGI:2685520]	A430093F15Rik	16.9881	13.8721	14.3249	13.2658	11.5515	11.7582		-0.343393	0.0418463	0.00887622
	ENSMUSG00000070476	family with sequence similarity 217, member B [Source:MGI Symbol;Acc:MGI:1918782]	Fam217b	0.89402	0.899101	0.645927	0.390351	0.831877	0.384206		-0.907779	0.0418477	0.00888201
	ENSMUSG00000001741	interleukin 16 [Source:MGI Symbol;Acc:MGI:1270855]	Il16	151.47	149.614	132.143	133.259	135.378	126.971		-0.170499	0.0419866	0.008917
	ENSMUSG00000006215	zinc finger and BTB domain containing 17 [Source:MGI Symbol;Acc:MGI:107410]	Zbtb17	30.7576	32.1486	32.0845	36.3772	34.4548	35.2397		0.184114	0.0420212	0.00892985
	ENSMUSG00000031832	TATA-box binding protein associated factor, RNA polymerase I, C [Source:MGI Symbol;Acc:MGI:109576]	Taf1c	33.3008	29.841	33.8093	39.2318	31.544	38.4886		0.240317	0.0420414	0.00893966
	ENSMUSG00000107950	predicted gene 6375 [Source:MGI Symbol;Acc:MGI:3644303]	Gm6375	1.11876	0.662947	1.06422	0.679983	0.460035	0.191222		-1.61038	0.0421078	0.00895929
	ENSMUSG00000028249	syndecan binding protein [Source:MGI Symbol;Acc:MGI:1337026]	Sdcbp	121.833	128.968	117.797	111.145	114.992	110.87		-0.130612	0.0421081	0.0089704
	ENSMUSG00000039781	centrosomal protein 131 [Source:MGI Symbol;Acc:MGI:107440]	Cep131	2.88625	2.37644	2.03989	3.62724	2.96832	3.57013		0.46826	0.0421081	0.00896738
	ENSMUSG00000022434	family with sequence similarity 118, member A [Source:MGI Symbol;Acc:MGI:1920475]	Fam118a	15.992	16.0111	16.8319	14.4219	13.1499	13.7533		-0.211337	0.042195	0.00899444
	ENSMUSG00000029012	origin recognition complex, subunit 5 [Source:MGI Symbol;Acc:MGI:1347044]	Orc5	21.0582	20.3618	20.4702	18.255	18.2813	18.2517		-0.158978	0.0422429	0.00901019
	ENSMUSG00000026463	ATPase, Ca++ transporting, plasma membrane 4 [Source:MGI Symbol;Acc:MGI:88111]	Atp2b4	49.2794	48.6135	35.7245	41.192	43.1524	38.443		-0.21628	0.0423171	0.00903523
	ENSMUSG00000073542	centrosomal protein 76 [Source:MGI Symbol;Acc:MGI:1923401]	Cep76	26.155	23.3993	22.6726	20.3429	21.4088	20.9472		-0.204363	0.0423171	0.00903712
	ENSMUSG00000005225	pleckstrin homology domain containing, family A (phosphoinositide binding specific) member 8 [Source:MGI Symbol;Acc:MGI:2681164]	Plekha8	2.19439	1.58208	1.39161	0.984439	1.48886	1.1721		-0.569623	0.0423804	0.00905619
	ENSMUSG00000050079	ring finger and SPRY domain containing 1 [Source:MGI Symbol;Acc:MGI:1914860]	Rspry1	12.5787	12.2845	10.5533	11.2143	11.3075	10.3251		-0.171126	0.0424074	0.0090745
	ENSMUSG00000030168	adiponectin receptor 2 [Source:MGI Symbol;Acc:MGI:93830]	Adipor2	104.903	105.526	99.9817	95.153	98.9872	92.6478		-0.128524	0.0424074	0.00907863
	ENSMUSG00000027593	hnRNP-associated with lethal yellow [Source:MGI Symbol;Acc:MGI:97850]	Raly	335.915	330.054	370.272	345.807	384.974	376.543		0.166909	0.0424074	0.00907288
	ENSMUSG00000044393	desmoglein 2 [Source:MGI Symbol;Acc:MGI:1196466]	Dsg2	1.02819	0.95481	0.945683	1.25109	0.993848	0.436945		-0.74975	0.0425146	0.00911273
	ENSMUSG00000030103	basic helix-loop-helix family, member e40 [Source:MGI Symbol;Acc:MGI:1097714]	Bhlhe40	104.919	110.675	98.7385	71.3216	108.639	85.8578		-0.260341	0.0425146	0.00910939
	ENSMUSG00000093826	predicted gene 6900 [Source:MGI Symbol;Acc:MGI:3645052]	Gm6900	1.36202	0.887806	1.18765	2.60177	2.77231	3.52111		1.38666	0.0426399	0.00914519
	ENSMUSG00000031197	von Hippel-Lindau binding protein 1 [Source:MGI Symbol;Acc:MGI:1333804]	Vbp1	153.704	143.27	148.173	132.198	135.539	131.811		-0.143376	0.0427543	0.00917533
	ENSMUSG00000056999	insulin degrading enzyme [Source:MGI Symbol;Acc:MGI:96412]	Ide	103.839	102.161	94.5906	136.446	99.5514	126.116		0.289175	0.0428227	0.00919562
	ENSMUSG00000072653	zinc finger protein 783 [Source:MGI Symbol;Acc:MGI:3040704]	Zfp783	5.01657	5.49797	5.01197	8.23473	6.1535	6.36257		0.354361	0.0428655	0.00921042
	ENSMUSG00000109509	ribosomal protein S12, pseudogene 4 [Source:MGI Symbol;Acc:MGI:3780139]	Rps12-ps4	29.9198	37.4757	40.6688	47.9083	37.1504	54.3236		0.567785	0.0428812	0.00921941
	ENSMUSG00000105139	predicted gene, 19391 [Source:MGI Symbol;Acc:MGI:5011576]	Gm19391	2.26696	3.21233	1.97674	1.5533	2.05079	1.34353		-0.742403	0.0428974	0.00924541
	ENSMUSG00000025324	ATPase, class V, type 10A [Source:MGI Symbol;Acc:MGI:1330809]	Atp10a	172.438	168.39	146.727	140.331	161.765	145.156		-0.156225	0.0428974	0.00924466
	ENSMUSG00000016477	E2F transcription factor 3 [Source:MGI Symbol;Acc:MGI:1096340]	E2f3	27.735	27.0409	27.046	31.0998	29.4757	29.864		0.152511	0.0428974	0.00923744
	ENSMUSG00000025577	chromobox 2 [Source:MGI Symbol;Acc:MGI:88289]	Cbx2	21.0638	19.115	20.1323	26.4151	22.6435	24.4048		0.292439	0.0428974	0.00923811
	ENSMUSG00000036529	SET binding factor 1 [Source:MGI Symbol;Acc:MGI:1925230]	Sbf1	130.015	124.659	112.255	146.356	122.68	137.958		0.146995	0.0429176	0.00925538
	ENSMUSG00000098343	microRNA 6240 [Source:MGI Symbol;Acc:MGI:5531232]	Mir6240	11.9439	14.2732	26.9049	47.5324	11.7053	46.784		1.32282	0.0429662	0.00927149
	ENSMUSG00000057706	mex3 RNA binding family member B [Source:MGI Symbol;Acc:MGI:1918252]	Mex3b	17.4245	15.2494	17.7967	21.3832	19.9706	19.2845		0.260132	0.0430395	0.00929861
	ENSMUSG00000026121	sema domain, immunoglobulin domain (Ig), transmembrane domain (TM) and short cytoplasmic domain, (semaphorin) 4C [Source:MGI Symbol;Acc:MGI:109252]	Sema4c	0.684568	0.694124	0.906447	1.93731	0.940402	1.26326		0.819687	0.0430395	0.00929475
	ENSMUSG00000034292	TRAF3 interacting protein 1 [Source:MGI Symbol;Acc:MGI:1921269]	Traf3ip1	12.9252	11.7378	11.8176	9.01911	9.76285	10.5287		-0.248732	0.0431523	0.00932862
	ENSMUSG00000005447	platelet-activating factor acetylhydrolase, isoform 1b, subunit 3 [Source:MGI Symbol;Acc:MGI:108414]	Pafah1b3	14.4253	13.9062	19.3739	16.0478	18.2996	19.64		0.358316	0.0431691	0.00933812
	ENSMUSG00000021265	solute carrier family 25 (mitochondrial carrier, palmitoylcarnitine transporter), member 29 [Source:MGI Symbol;Acc:MGI:2444911]	Slc25a29	2.23432	2.15547	2.18207	3.84126	2.58721	3.19266		0.535667	0.0431691	0.00934357
	ENSMUSG00000108591	promoter of Mat2a antisense radiation induced circulating long non-coding RNA [Source:MGI Symbol;Acc:MGI:1925358]	Particl	3.8071	2.53025	3.4499	4.56311	3.98431	5.33338		0.636867	0.0433742	0.00939933
	ENSMUSG00000021636	MARVEL (membrane-associating) domain containing 2 [Source:MGI Symbol;Acc:MGI:2446166]	Marveld2	5.16496	6.37425	7.80647	5.85399	10.6532	10.3907		0.718352	0.0433742	0.00939444
	ENSMUSG00000015165	heterogeneous nuclear ribonucleoprotein L [Source:MGI Symbol;Acc:MGI:104816]	Hnrnpl	284.96	281.086	273.673	306.361	283.624	305.565		0.122527	0.0433948	0.00940949
	ENSMUSG00000025544	transmembrane 9 superfamily member 2 [Source:MGI Symbol;Acc:MGI:1915309]	Tm9sf2	194.375	176.783	169.916	166.749	174.687	159.438		-0.147285	0.0434032	0.00942839
	ENSMUSG00000056851	poly(rC) binding protein 2 [Source:MGI Symbol;Acc:MGI:108202]	Pcbp2	311.443	311.391	289.39	357.085	313.594	328.655		0.119762	0.0434032	0.00941784
	ENSMUSG00000031530	dual specificity phosphatase 4 [Source:MGI Symbol;Acc:MGI:2442191]	Dusp4	2.33755	3.10279	2.44596	6.98205	2.99896	4.2751		0.727685	0.0434032	0.00942473
	ENSMUSG00000083465	predicted gene 11652 [Source:MGI Symbol;Acc:MGI:3651204]	Gm11652	1.65442	1.91716	1.12204	1.05344	0.748328	0.691236		-1.08764	0.0434472	0.00944364
	ENSMUSG00000001774	cysteine and histidine-rich domain (CHORD)-containing, zinc-binding protein 1 [Source:MGI Symbol;Acc:MGI:1914167]	Chordc1	45.7237	45.3136	40.9535	40.9568	41.3777	40.2536		-0.121621	0.0435631	0.00947454
	ENSMUSG00000022339	estrogen receptor-binding fragment-associated gene 9 [Source:MGI Symbol;Acc:MGI:1859920]	Ebag9	27.7042	31.3014	27.9154	23.3398	28.3613	23.7291		-0.226683	0.0436269	0.00949986
	ENSMUSG00000039623	adaptor-related protein complex 5, zeta 1 subunit [Source:MGI Symbol;Acc:MGI:1924908]	Ap5z1	11.3128	10.1569	9.72724	12.7405	11.4265	12.4659		0.237144	0.0436269	0.00949498
	ENSMUSG00000029860	zyxin [Source:MGI Symbol;Acc:MGI:103072]	Zyx	203.284	197.106	192.689	213.124	207.53	214.135		0.11918	0.0437552	0.00953354
	ENSMUSG00000071647	echinoderm microtubule associated protein like 3 [Source:MGI Symbol;Acc:MGI:2387612]	Eml3	90.7695	89.692	83.5985	96.0364	89.8843	98.2553		0.135883	0.0438235	0.00955447
	ENSMUSG00000020642	ring finger protein 144A [Source:MGI Symbol;Acc:MGI:1344401]	Rnf144a	6.01301	6.97025	5.94877	12.5015	6.12855	8.65058		0.451265	0.0438235	0.00956565
	ENSMUSG00000081631	predicted gene 12005 [Source:MGI Symbol;Acc:MGI:3651316]	Gm12005	3.99441	3.6051	5.89439	5.86943	6.11518	8.37668		0.876804	0.0438235	0.00956027
	ENSMUSG00000025498	interferon regulatory factor 7 [Source:MGI Symbol;Acc:MGI:1859212]	Irf7	21.1564	22.3541	16.7806	14.1683	17.6324	17.5983		-0.256372	0.0440053	0.00961687
	ENSMUSG00000048534	junction adhesion molecule like [Source:MGI Symbol;Acc:MGI:2685484]	Jaml	170.52	184.689	156.237	153.096	162.733	148.467		-0.176862	0.0440053	0.0096113
	ENSMUSG00000048251	B cell leukemia/lymphoma 11B [Source:MGI Symbol;Acc:MGI:1929913]	Bcl11b	84.4931	74.2697	74.3522	96.3746	79.2805	89.7554		0.196383	0.0440058	0.00962275
	ENSMUSG00000045934	myotubularin related protein 11 [Source:MGI Symbol;Acc:MGI:2652817]	Mtmr11	0.369691	0.60244	0.322363	0.382522	0.445917	0.115846		-1.25024	0.0441103	0.00965137
	ENSMUSG00000032122	solute carrier family 37 (glycerol-3-phosphate transporter), member 2 [Source:MGI Symbol;Acc:MGI:1929693]	Slc37a2	1.03428	1.25693	0.794867	0.719962	1.12595	0.461431		-0.866722	0.0443579	0.00972849
	ENSMUSG00000019920	LIM and senescent cell antigen-like domains 1 [Source:MGI Symbol;Acc:MGI:1195263]	Lims1	125.294	125.956	110.914	115.534	109.511	109.538		-0.138184	0.0443579	0.00972881
	ENSMUSG00000037351	ARP1 actin-related protein 1B, centractin beta [Source:MGI Symbol;Acc:MGI:1917446]	Actr1b	70.7325	70.1176	70.1116	75.417	71.9245	80.3514		0.174355	0.0443579	0.00971976
	ENSMUSG00000075031	H2B clustered histone 3 [Source:MGI Symbol;Acc:MGI:2448377]	H2bc3	5.04322	5.08042	4.39758	6.3495	4.76969	12.9301		1.01054	0.0443579	0.00972325
	ENSMUSG00000022240	catenin (cadherin associated protein), delta 2 [Source:MGI Symbol;Acc:MGI:1195966]	Ctnnd2	2.18998	1.98672	2.13601	3.91382	3.47211	2.88649		0.577101	0.0444552	0.00975598
	ENSMUSG00000073555	predicted gene 4951 [Source:MGI Symbol;Acc:MGI:3644953]	Gm4951	11.0949	11.5942	10.0968	7.90565	9.95727	7.65701		-0.441056	0.0444623	0.00976336
	ENSMUSG00000076795	T cell receptor alpha variable 8D-2 [Source:MGI Symbol;Acc:MGI:3647760]	Trav8d-2	13.4767	18.0196	14.4633	13.862	10.316	8.77096		-0.637462	0.0444805	0.00977904
	ENSMUSG00000070106	microRNA 363 [Source:MGI Symbol;Acc:MGI:3619370]	Mir363	6.2108	4.0484	5.41569	7.41505	14.0464	16.0563		1.33256	0.0444805	0.00977829
	ENSMUSG00000018326	tyrosine 3-monooxygenase/tryptophan 5-monooxygenase activation protein, beta polypeptide [Source:MGI Symbol;Acc:MGI:1891917]	Ywhab	419.222	411.767	402.574	346.602	386.162	374.648		-0.126674	0.0445821	0.0098072
	ENSMUSG00000032690	2'-5' oligoadenylate synthetase 2 [Source:MGI Symbol;Acc:MGI:2180852]	Oas2	0.523265	0.306972	0.410648	0.199911	0.14201	0.221359		-0.970049	0.0446499	0.00983821
	ENSMUSG00000022969	interleukin 10 receptor, beta [Source:MGI Symbol;Acc:MGI:109380]	Il10rb	79.1437	73.9938	68.8517	66.4784	68.6643	62.6431		-0.211637	0.0446499	0.0098368
	ENSMUSG00000039988	ankyrin repeat domain 13c [Source:MGI Symbol;Acc:MGI:2139746]	Ankrd13c	18.301	17.963	16.6462	17.7115	16.7663	15.4735		-0.143273	0.0446499	0.00983968
	ENSMUSG00000114888	predicted gene, 49616 [Source:MGI Symbol;Acc:MGI:6215034]	Gm49616	0.813684	0.748779	0.375626	0.411439	0.389696	0.224979		-1.29077	0.0446638	0.00985445
	ENSMUSG00000027324	RNA pseudouridylate synthase domain containing 2 [Source:MGI Symbol;Acc:MGI:1918066]	Rpusd2	19.9252	18.1774	18.7628	25.9773	21.5679	21.6036		0.233926	0.0446638	0.00985293
	ENSMUSG00000003033	adaptor-related protein complex AP-1, mu subunit 1 [Source:MGI Symbol;Acc:MGI:102776]	Ap1m1	176.654	176.943	182.008	184.41	192.531	194.159		0.139946	0.0446954	0.00986729
	ENSMUSG00000085795	zinc finger protein 703 [Source:MGI Symbol;Acc:MGI:2662729]	Zfp703	12.3593	12.0843	12.8726	16.9527	12.392	15.298		0.29642	0.044704	0.00987504
	ENSMUSG00000021222	DDB1 and CUL4 associated factor 4 [Source:MGI Symbol;Acc:MGI:1921078]	Dcaf4	16.6681	17.8852	18.615	22.0125	17.9205	20.0688		0.213612	0.0448449	0.00991206
	ENSMUSG00000005947	integrin alpha E, epithelial-associated [Source:MGI Symbol;Acc:MGI:1298377]	Itgae	8.54138	10.0083	5.60809	10.5131	6.2781	5.20966		-0.49685	0.0449249	0.00993562
	ENSMUSG00000019792	tRNA methyltransferase 11 [Source:MGI Symbol;Acc:MGI:1920931]	Trmt11	18.9115	17.5611	18.3269	17.1407	17.1478	15.3033		-0.187136	0.0449966	0.00996328
	ENSMUSG00000001632	bromodomain and PHD finger containing, 1 [Source:MGI Symbol;Acc:MGI:1926033]	Brpf1	45.0418	45.596	44.2486	51.3059	44.4764	49.3193		0.131851	0.0449966	0.00995771
	ENSMUSG00000038797	zinc finger and SCAN domain containing 2 [Source:MGI Symbol;Acc:MGI:99176]	Zscan2	9.02371	8.16372	8.27548	11.9622	9.92255	10.8597		0.356244	0.0451136	0.0099951
	ENSMUSG00000023944	heat shock protein 90 alpha (cytosolic), class B member 1 [Source:MGI Symbol;Acc:MGI:96247]	Hsp90ab1	3416.19	3439.65	3476.71	3748.33	3848.77	3635.77		0.124249	0.0452097	0.0100223
	ENSMUSG00000004612	natural killer cell group 7 sequence [Source:MGI Symbol;Acc:MGI:1931250]	Nkg7	1969.5	2007.64	1815.69	1672.89	1802.33	1765.61		-0.133699	0.0452981	0.0100709
	ENSMUSG00000022108	integral membrane protein 2B [Source:MGI Symbol;Acc:MGI:1309517]	Itm2b	644.879	631.599	596.777	542.734	598.039	568.009		-0.126841	0.0452981	0.0100575
	ENSMUSG00000015023	DEAD box helicase 19a [Source:MGI Symbol;Acc:MGI:99526]	Ddx19a	75.7316	79.2189	75.995	80.9461	87.4277	83.5961		0.143797	0.0452981	0.0100673
	ENSMUSG00000026955	suppressor APC domain containing 2 [Source:MGI Symbol;Acc:MGI:1919330]	Sapcd2	18.3049	18.3965	19.3279	20.9164	20.4433	22.3079		0.25727	0.0452981	0.0100625
	ENSMUSG00000023266	fibroblast growth factor receptor substrate 3 [Source:MGI Symbol;Acc:MGI:2135965]	Frs3	0.186145	0.339739	0.129852	0.640046	0.471506	0.559972		1.26535	0.0452981	0.0100716
	ENSMUSG00000052459	ATPase, H+ transporting, lysosomal V1 subunit A [Source:MGI Symbol;Acc:MGI:1201780]	Atp6v1a	54.2572	53.5019	51.0073	43.0438	51.4887	46.3148		-0.171162	0.0453062	0.0100836
	ENSMUSG00000028800	histone deacetylase 1 [Source:MGI Symbol;Acc:MGI:108086]	Hdac1	138.898	138.242	140.069	116.424	132.075	122.249		-0.150573	0.0453062	0.0100853
	ENSMUSG00000043415	OTU domain containing 1 [Source:MGI Symbol;Acc:MGI:1918448]	Otud1	6.04468	5.4143	5.48597	10.4863	6.02626	7.61529		0.433717	0.0453451	0.0100999
	ENSMUSG00000000244	tetraspanin 32 [Source:MGI Symbol;Acc:MGI:1350360]	Tspan32	9.95656	12.4929	9.78955	9.04579	8.56776	7.9902		-0.371646	0.0453646	0.0101102
	ENSMUSG00000021690	junction-mediating and regulatory protein [Source:MGI Symbol;Acc:MGI:1913096]	Jmy	13.8828	14.1223	13.8709	21.4591	14.8305	15.7452		0.235598	0.0453856	0.0101208
	ENSMUSG00000022677	centrosomal protein 20 [Source:MGI Symbol;Acc:MGI:1913336]	Cep20	27.6991	29.3118	28.4555	23.8697	25.4933	24.9457		-0.169159	0.0455863	0.0101715
	ENSMUSG00000007021	synaptogyrin 3 [Source:MGI Symbol;Acc:MGI:1341881]	Syngr3	0.843452	0.659746	0.539346	0.161119	0.55955	0.317164		-1.07275	0.0457328	0.0102102
	ENSMUSG00000086324	predicted gene 15564 [Source:MGI Symbol;Acc:MGI:3783013]	Gm15564	50.6377	39.017	52.0708	85.3498	56.7159	96.5403		0.925745	0.0457416	0.0102191
	ENSMUSG00000052271	basic helix-loop-helix family, member a15 [Source:MGI Symbol;Acc:MGI:891976]	Bhlha15	0.0666586	0	0	0.0636667	0.0603022	0.156661		1.91296	0.0457416	0.0102242
	ENSMUSG00000002346	solute carrier family 25, member 42 [Source:MGI Symbol;Acc:MGI:1920345]	Slc25a42	4.60294	4.68408	4.94511	5.80615	5.06007	6.42679		0.396821	0.0457639	0.0102352
	ENSMUSG00000069267	H3 clustered histone 2 [Source:MGI Symbol;Acc:MGI:2448319]	H3c2	1.31479	0.244863	1.31025	1.61457	1.35933	3.35487		1.70718	0.0458903	0.0102694
	ENSMUSG00000097287	RIKEN cDNA D130017N08 gene [Source:MGI Symbol;Acc:MGI:2443273]	D130017N08Rik	1.38499	1.62796	1.64324	2.08182	1.93073	2.00636		0.422759	0.0459238	0.010283
	ENSMUSG00000029254	signal transducing adaptor family member 1 [Source:MGI Symbol;Acc:MGI:1926193]	Stap1	19.0746	20.8119	18.626	20.3839	16.4421	16.4872		-0.19232	0.0459295	0.0102989
	ENSMUSG00000018068	integrator complex subunit 2 [Source:MGI Symbol;Acc:MGI:1917672]	Ints2	18.2324	17.2436	15.927	14.1011	16.186	15.3444		-0.166455	0.0459295	0.0102954
	ENSMUSG00000048537	pleckstrin homology like domain, family B, member 1 [Source:MGI Symbol;Acc:MGI:2143230]	Phldb1	0.275762	0.14803	0.141446	0.309864	0.322838	0.381232		0.867326	0.0459295	0.0103076
	ENSMUSG00000078552	doublecortin domain containing 2b [Source:MGI Symbol;Acc:MGI:2686212]	Dcdc2b	1.35904	0.885863	1.40725	2.59608	1.1526	3.03431		1.09695	0.0459295	0.0103083
	ENSMUSG00000034220	glypican 1 [Source:MGI Symbol;Acc:MGI:1194891]	Gpc1	27.787	27.7498	25.5288	12.138	23.7487	22.0265		-0.381925	0.0459992	0.0103322
	ENSMUSG00000025225	nuclear factor of kappa light polypeptide gene enhancer in B cells 2, p49/p100 [Source:MGI Symbol;Acc:MGI:1099800]	Nfkb2	45.9307	46.6639	43.3734	54.157	50.169	49.0056		0.143857	0.0459992	0.010336
	ENSMUSG00000024533	spire type actin nucleation factor 1 [Source:MGI Symbol;Acc:MGI:1915416]	Spire1	4.21364	3.22553	4.01417	4.81224	4.49011	4.68009		0.318591	0.0461274	0.0103709
	ENSMUSG00000026269	arginyl aminopeptidase (aminopeptidase B)-like 1 [Source:MGI Symbol;Acc:MGI:1914170]	Rnpepl1	24.7125	23.1723	21.9135	28.5848	23.7803	27.0362		0.193816	0.0462272	0.0103994
	ENSMUSG00000028435	aquaporin 3 [Source:MGI Symbol;Acc:MGI:1333777]	Aqp3	34.5728	34.4468	28.2036	48.8323	28.6265	46.5671		0.389354	0.0463774	0.0104393
	ENSMUSG00000069892	RIKEN cDNA 9930111J21 gene 2 [Source:MGI Symbol;Acc:MGI:3711310]	9930111J21Rik2	36.9754	36.4555	30.8959	33.4295	30.3117	30.9374		-0.176997	0.0464322	0.0104638
	ENSMUSG00000043061	transmembrane protein 18 [Source:MGI Symbol;Acc:MGI:2387176]	Tmem18	51.7011	50.9468	47.9817	48.4585	43.4718	44.9394		-0.149218	0.0464322	0.0104624
	ENSMUSG00000028573	FGGY carbohydrate kinase domain containing [Source:MGI Symbol;Acc:MGI:1922828]	Fggy	1.15576	1.37683	1.19893	2.24583	1.71253	1.61102		0.471343	0.0464486	0.0104736
	ENSMUSG00000027333	spermine oxidase [Source:MGI Symbol;Acc:MGI:2445356]	Smox	3.52886	3.5478	3.44218	4.54157	3.73344	4.83555		0.400782	0.0464582	0.0104818
	ENSMUSG00000031902	nuclear factor of activated T cells, cytoplasmic, calcineurin dependent 3 [Source:MGI Symbol;Acc:MGI:103296]	Nfatc3	136.434	132.11	111.338	123.727	121.735	114.628		-0.136809	0.0465031	0.010498
	ENSMUSG00000109390	predicted gene 45718 [Source:MGI Symbol;Acc:MGI:5804833]	Gm45718	1.78024	1.64059	2.08762	2.19872	1.94369	2.85661		0.55763	0.0465127	0.0105063
	ENSMUSG00000071711	mercaptopyruvate sulfurtransferase [Source:MGI Symbol;Acc:MGI:2179733]	Mpst	32.1155	31.6665	35.0643	32.802	37.6559	38.6711		0.239001	0.046518	0.0105136
	ENSMUSG00000031381	phosphatidylinositol glycan anchor biosynthesis, class A [Source:MGI Symbol;Acc:MGI:99461]	Piga	27.6495	27.2482	23.7122	24.5446	22.8185	23.6095		-0.163422	0.0465213	0.0105326
	ENSMUSG00000031820	BRISC and BRCA1 A complex member 1 [Source:MGI Symbol;Acc:MGI:1915501]	Babam1	109.241	106.826	114.796	115.155	124.001	119.894		0.158819	0.0465213	0.0105207
	ENSMUSG00000037098	RAB11 family interacting protein 3 (class II) [Source:MGI Symbol;Acc:MGI:2444431]	Rab11fip3	3.81178	3.39312	4.21698	5.1483	4.34456	4.53053		0.318576	0.0465213	0.0105306
	ENSMUSG00000026155	small ArfGAP 1 [Source:MGI Symbol;Acc:MGI:2138261]	Smap1	73.2592	69.1766	62.5171	63.0331	62.2953	62.4082		-0.139124	0.0465636	0.0105605
	ENSMUSG00000017999	DEAD box helicase 27 [Source:MGI Symbol;Acc:MGI:2385884]	Ddx27	106.033	103.721	109.681	119.261	114.008	112.815		0.13015	0.0465636	0.0105497
	ENSMUSG00000056501	CCAAT/enhancer binding protein (C/EBP), beta [Source:MGI Symbol;Acc:MGI:88373]	Cebpb	1.39371	2.2207	3.24077	3.91952	3.71239	3.56666		0.933769	0.0465636	0.0105554
	ENSMUSG00000003299	mitochondrial ribosomal protein L4 [Source:MGI Symbol;Acc:MGI:2137210]	Mrpl4	65.1903	64.2182	68.5239	73.9096	68.7559	72.244		0.158753	0.0467613	0.0106176
	ENSMUSG00000069265	H3 clustered histone 1 [Source:MGI Symbol;Acc:MGI:2668828]	H3c1	2.83499	3.69587	3.613	4.16576	5.52386	6.76528		0.909284	0.0467613	0.0106166
	ENSMUSG00000029474	ring finger protein 34 [Source:MGI Symbol;Acc:MGI:2153340]	Rnf34	34.2538	32.2094	30.1659	27.9317	30.7265	28.3302		-0.17072	0.0468558	0.0106452
	ENSMUSG00000113263	predicted gene 4811 [Source:MGI Symbol;Acc:MGI:3648985]	Gm4811	1.71815	2.36433	1.66466	1.27636	1.29526	0.897332		-0.897111	0.0468806	0.0106575
	ENSMUSG00000022667	CD200 receptor 1 [Source:MGI Symbol;Acc:MGI:1889024]	Cd200r1	7.82611	7.1645	6.76355	3.88692	7.26863	4.70858		-0.554149	0.0468806	0.0106632
	ENSMUSG00000052419	RIKEN cDNA 2610001J05 gene [Source:MGI Symbol;Acc:MGI:1913770]	2610001J05Rik	26.2818	26.1584	25.6812	20.0465	24.3603	22.0164		-0.217329	0.0468992	0.0106735
	ENSMUSG00000039199	zinc finger, DHHC domain containing 1 [Source:MGI Symbol;Acc:MGI:1918046]	Zdhhc1	1.93214	1.90713	2.02174	3.58538	2.59687	2.5948		0.497414	0.0469201	0.0106847
	ENSMUSG00000054999	N-acetylated alpha-linked acidic dipeptidase-like 1 [Source:MGI Symbol;Acc:MGI:2685810]	Naaladl1	0.888237	0.365672	0.815289	1.02697	1.05729	1.31844		0.949564	0.0469201	0.0106906
	ENSMUSG00000006310	zinc finger and BTB domain containing 32 [Source:MGI Symbol;Acc:MGI:1891838]	Zbtb32	21.6403	21.3842	26.0646	25.2936	32.9408	26.8461		0.333342	0.0469266	0.0106982
	ENSMUSG00000057605	predicted gene 6807 [Source:MGI Symbol;Acc:MGI:3649145]	Gm6807	9.57324	9.23198	10.749	11.7739	9.96535	14.424		0.469837	0.0469389	0.0107133
	ENSMUSG00000000555	integrin alpha 5 (fibronectin receptor alpha) [Source:MGI Symbol;Acc:MGI:96604]	Itga5	1.79412	1.10791	1.44093	2.0518	1.55897	2.35238		0.584427	0.0469389	0.0107093
	ENSMUSG00000032528	vasoactive intestinal peptide receptor 1 [Source:MGI Symbol;Acc:MGI:109272]	Vipr1	8.1316	7.90484	6.05764	4.67915	4.35923	6.37972		-0.393187	0.0469576	0.0107269
	ENSMUSG00000030061	ubiquitin-like modifier activating enzyme 3 [Source:MGI Symbol;Acc:MGI:1341217]	Uba3	42.3347	43.0317	42.1453	36.4872	38.3805	37.6491		-0.156125	0.0469576	0.0107299
	ENSMUSG00000058905	predicted pseudogene 10051 [Source:MGI Symbol;Acc:MGI:3641791]	Gm10051	26.7222	24.2024	30.6595	42.4485	27.991	42.8379		0.608567	0.0470394	0.0107548
	ENSMUSG00000028382	polypyrimidine tract binding protein 3 [Source:MGI Symbol;Acc:MGI:1923334]	Ptbp3	279.159	258.491	225.461	236.593	239.005	232.721		-0.138085	0.0471632	0.0107893
	ENSMUSG00000071141	ribosomal protein L36A, pseudogene 3 [Source:MGI Symbol;Acc:MGI:3642503]	Rpl36a-ps3	4.71615	5.20238	2.5307	3.11848	3.93824	1.36417		-1.18187	0.0472306	0.0108171
	ENSMUSG00000001576	endoplasmic reticulum-golgi intermediate compartment (ERGIC) 1 [Source:MGI Symbol;Acc:MGI:1914708]	Ergic1	31.3143	32.5391	30.0588	33.7507	35.7481	33.9337		0.137463	0.0472306	0.0108146
	ENSMUSG00000043099	hypermethylated in cancer 1 [Source:MGI Symbol;Acc:MGI:1338010]	Hic1	5.65183	4.73662	6.30928	10.4107	7.0232	7.2983		0.509153	0.0472306	0.0108233
	ENSMUSG00000029359	tescalcin [Source:MGI Symbol;Acc:MGI:1930803]	Tesc	29.9366	35.6875	31.9121	17.757	27.0157	26.6289		-0.325219	0.0473657	0.0108792
	ENSMUSG00000033111	RIKEN cDNA 3830406C13 gene [Source:MGI Symbol;Acc:MGI:1917937]	3830406C13Rik	13.054	14.324	12.4156	11.8423	12.2651	10.9925		-0.222124	0.0473657	0.0108826
	ENSMUSG00000006010	odr4 GPCR localization factor homolog [Source:MGI Symbol;Acc:MGI:2385108]	Odr4	37.6341	36.6577	35.0204	34.1816	34.662	30.8932		-0.184409	0.0473657	0.0108915
	ENSMUSG00000021969	zinc finger, DHHC domain containing 20 [Source:MGI Symbol;Acc:MGI:1923215]	Zdhhc20	107.686	103.006	90.9857	99.0746	87.6171	92.4607		-0.134951	0.0473657	0.0108716
	ENSMUSG00000021957	transketolase [Source:MGI Symbol;Acc:MGI:105992]	Tkt	274.198	258.777	284.558	272.613	310.959	295.857		0.156547	0.0473657	0.0108867
	ENSMUSG00000039205	CDKN1A interacting zinc finger protein 1 [Source:MGI Symbol;Acc:MGI:1920234]	Ciz1	30.426	31.284	27.9471	37.6957	30.8306	34.1758		0.185791	0.0473657	0.0108662
	ENSMUSG00000024425	Nedd4 family interacting protein 1 [Source:MGI Symbol;Acc:MGI:1929601]	Ndfip1	129.586	130.209	123.277	126.387	122.637	113.815		-0.119255	0.0475277	0.0109349
	ENSMUSG00000018999	solute carrier family 35, member B4 [Source:MGI Symbol;Acc:MGI:1931249]	Slc35b4	28.8562	29.6781	24.5091	24.1553	27.3099	24.5861		-0.164702	0.0475533	0.0109471
	ENSMUSG00000068240	predicted gene 11808 [Source:MGI Symbol;Acc:MGI:3649356]	Gm11808	36.5069	51.5086	34.0495	65.323	46.1942	55.1717		0.43858	0.047556	0.0109539
	ENSMUSG00000048920	fukutin related protein [Source:MGI Symbol;Acc:MGI:2447586]	Fkrp	17.6086	17.3803	17.6946	19.986	19.6207	19.5073		0.181039	0.0475593	0.0109609
	ENSMUSG00000027171	proline rich Gla (G-carboxyglutamic acid) 4 (transmembrane) [Source:MGI Symbol;Acc:MGI:2442211]	Prrg4	28.8832	30.9865	22.4584	23.2643	25.3634	22.6559		-0.272972	0.0476276	0.0109892
	ENSMUSG00000026496	poly (ADP-ribose) polymerase family, member 1 [Source:MGI Symbol;Acc:MGI:1340806]	Parp1	114.692	113.84	110.561	120.409	125.45	120.954		0.11983	0.0476276	0.0109877
	ENSMUSG00000032554	transferrin [Source:MGI Symbol;Acc:MGI:98821]	Trf	0.210456	0.457274	0.367027	0.134007	0.0951939	0.0989228		-1.44857	0.0476775	0.0110069
	ENSMUSG00000116508	predicted gene, 49463 [Source:MGI Symbol;Acc:MGI:6155122]	Gm49463	2.7941	3.08692	1.07367	1.2665	1.67083	1.3356		-0.807	0.0477482	0.0110453
	ENSMUSG00000030847	BCL2-associated athanogene 3 [Source:MGI Symbol;Acc:MGI:1352493]	Bag3	7.77259	8.59218	5.94521	4.94915	6.29127	4.35847		-0.682635	0.0477482	0.0110407
	ENSMUSG00000051147	N-acetyltransferase 2 (arylamine N-acetyltransferase) [Source:MGI Symbol;Acc:MGI:109201]	Nat2	26.856	27.8294	28.355	27.1122	23.5337	21.5065		-0.266029	0.0477482	0.0110569
	ENSMUSG00000076472	T cell receptor beta, variable 15 [Source:MGI Symbol;Acc:MGI:98586]	Trbv15	259.028	246.597	250.842	208.323	251.127	203.563		-0.234984	0.0477482	0.0110593
	ENSMUSG00000022967	interferon (alpha and beta) receptor 1 [Source:MGI Symbol;Acc:MGI:107658]	Ifnar1	129.313	128.634	107.356	116.731	111.183	107.834		-0.173964	0.0477482	0.0110608
	ENSMUSG00000029463	family with sequence similarity 216, member A [Source:MGI Symbol;Acc:MGI:1916198]	Fam216a	40.2718	46.8132	45.0657	50.4843	48.1959	51.1092		0.241357	0.0477482	0.0110573
	ENSMUSG00000036572	UPF3 regulator of nonsense transcripts homolog B (yeast) [Source:MGI Symbol;Acc:MGI:1915384]	Upf3b	30.722	32.7622	27.0937	28.0081	24.842	26.9649		-0.185121	0.047778	0.011074
	ENSMUSG00000078622	coiled-coil domain containing 47 [Source:MGI Symbol;Acc:MGI:1914413]	Ccdc47	63.1647	62.9603	51.6428	51.1909	54.6121	53.918		-0.165516	0.0477992	0.0110851
	ENSMUSG00000029674	LIM-domain containing, protein kinase [Source:MGI Symbol;Acc:MGI:104572]	Limk1	21.0076	18.6536	19.1547	22.1923	19.328	23.1575		0.196553	0.0478209	0.0110965
	ENSMUSG00000019822	sphingomyelin phosphodiesterase 2, neutral [Source:MGI Symbol;Acc:MGI:1278330]	Smpd2	6.6723	8.5965	7.36355	9.08626	7.75727	9.33523		0.296935	0.0478242	0.0111053
	ENSMUSG00000026817	adenylate kinase 1 [Source:MGI Symbol;Acc:MGI:87977]	Ak1	0.0898207	0	0.117483	0.214473	0.121883	0.211096		1.72666	0.0478242	0.0111098
	ENSMUSG00000020702	chemokine (C-C motif) ligand 1 [Source:MGI Symbol;Acc:MGI:98258]	Ccl1	3.09688	2.05069	1.75741	1.36156	2.89051	0.970437		-0.949967	0.0479228	0.0111389
	ENSMUSG00000042605	ataxin 2 [Source:MGI Symbol;Acc:MGI:1277223]	Atxn2	7.17762	7.02515	6.9448	9.52108	7.09079	8.40824		0.249587	0.0479496	0.0111514
	ENSMUSG00000101939	predicted gene 28438 [Source:MGI Symbol;Acc:MGI:5579144]	Gm28438	6.07578	4.40043	4.12063	3.86872	5.49641	1.58659		-1.11888	0.0480546	0.0111869
	ENSMUSG00000111229	predicted gene, 39323 [Source:MGI Symbol;Acc:MGI:5622208]	Gm39323	53.3972	45.5651	33.6525	33.4585	35.5218	35.983		-0.368457	0.0480546	0.0111989
	ENSMUSG00000027843	protein tyrosine phosphatase, non-receptor type 22 (lymphoid) [Source:MGI Symbol;Acc:MGI:107170]	Ptpn22	238.509	254.937	195.07	235.651	192.845	206.717		-0.173624	0.0480546	0.0112047
	ENSMUSG00000039117	TATA-box binding protein associated factor 4 [Source:MGI Symbol;Acc:MGI:2152346]	Taf4	53.0223	52.4009	45.0917	57.1413	51.7051	57.1893		0.149894	0.0480546	0.0112074
	ENSMUSG00000044847	U7 snRNP-specific Sm-like protein LSM11 [Source:MGI Symbol;Acc:MGI:1919540]	Lsm11	11.8383	12.7042	11.8649	16.2883	12.6359	13.6568		0.202057	0.0480546	0.0112035
	ENSMUSG00000030105	ADP-ribosylation factor-like 8B [Source:MGI Symbol;Acc:MGI:1914416]	Arl8b	86.5789	82.6694	83.838	75.3176	79.3108	75.4761		-0.129788	0.0480774	0.011219
	ENSMUSG00000027287	synaptosomal-associated protein 23 [Source:MGI Symbol;Acc:MGI:109356]	Snap23	26.3395	30.0235	28.4551	21.7373	25.9382	22.6191		-0.260252	0.0480786	0.0112409
	ENSMUSG00000000346	DAZ associated protein 2 [Source:MGI Symbol;Acc:MGI:1344344]	Dazap2	542.107	543.864	504.815	462.047	481.549	492.862		-0.118689	0.0480786	0.0112571
	ENSMUSG00000038002	cramped chromatin regulator homolog 1 [Source:MGI Symbol;Acc:MGI:1930190]	Cramp1l	38.7042	38.5078	34.0973	43.9565	39.6676	41.9303		0.164162	0.0480786	0.0112473
	ENSMUSG00000047959	potassium voltage-gated channel, shaker-related subfamily, member 3 [Source:MGI Symbol;Acc:MGI:96660]	Kcna3	56.5119	56.4317	51.5195	80.7001	58.9882	63.3709		0.23574	0.0480786	0.0112537
	ENSMUSG00000033871	peroxisome proliferative activated receptor, gamma, coactivator 1 beta [Source:MGI Symbol;Acc:MGI:2444934]	Ppargc1b	8.20129	8.29465	9.77267	11.7358	9.82191	10.92		0.371397	0.0480786	0.0112464
	ENSMUSG00000045639	zinc finger protein 629 [Source:MGI Symbol;Acc:MGI:2444524]	Zfp629	2.71948	2.1904	2.58278	3.44116	2.99293	3.35442		0.424352	0.0480786	0.0112365
	ENSMUSG00000008226	secernin 3 [Source:MGI Symbol;Acc:MGI:1921866]	Scrn3	5.53845	5.07626	4.76615	3.51118	4.31019	4.11524		-0.341302	0.0481901	0.0112895
	ENSMUSG00000030654	ADP-ribosylation factor-like 6 interacting protein 1 [Source:MGI Symbol;Acc:MGI:1858943]	Arl6ip1	914.87	877.003	800.735	698.992	831.663	784.009		-0.152271	0.0482829	0.0113221
	ENSMUSG00000075284	WAS/WASL interacting protein family, member 1 [Source:MGI Symbol;Acc:MGI:2178801]	Wipf1	289.453	272.396	243.871	253.314	254.883	244.108		-0.132442	0.0482829	0.0113239
	ENSMUSG00000029299	ATP binding cassette subfamily G member 3 [Source:MGI Symbol;Acc:MGI:1351624]	Abcg3	20.535	22.2377	17.3912	16.2609	17.5976	16.5908		-0.277029	0.0483706	0.0113635
	ENSMUSG00000015461	activating transcription factor 6 beta [Source:MGI Symbol;Acc:MGI:105121]	Atf6b	51.2357	50.1094	49.2436	59.2639	54.9857	55.313		0.164852	0.0483706	0.0113554
	ENSMUSG00000059824	D site albumin promoter binding protein [Source:MGI Symbol;Acc:MGI:94866]	Dbp	7.15913	5.8839	6.03905	11.6317	6.33566	8.70529		0.419481	0.0483706	0.0113604
	ENSMUSG00000000355	malignant T cell amplified sequence 1 [Source:MGI Symbol;Acc:MGI:1916245]	Mcts1	122.531	134.324	118.479	102.801	109.438	111.914		-0.173131	0.04852	0.0114113
	ENSMUSG00000032202	RAB27A, member RAS oncogene family [Source:MGI Symbol;Acc:MGI:1861441]	Rab27a	98.6499	99.6835	90.7851	83.9569	92.855	84.1309		-0.170805	0.04852	0.0114084
	ENSMUSG00000026639	laminin, beta 3 [Source:MGI Symbol;Acc:MGI:99915]	Lamb3	6.37565	6.81927	6.11231	6.69508	7.4725	7.98045		0.271494	0.0485295	0.0114263
	ENSMUSG00000093686	predicted gene 4705 [Source:MGI Symbol;Acc:MGI:3782885]	Gm4705	3.61858	5.57512	5.45011	12.8821	3.57112	13.607		1.22405	0.0485295	0.0114246
	ENSMUSG00000059343	aldolase 1 A, retrogene 1 [Source:MGI Symbol;Acc:MGI:2447811]	Aldoart1	0.340504	0.369919	0.197942	0.162611	0.102678	0.1067		-1.3256	0.0485563	0.011439
	ENSMUSG00000032501	tribbles pseudokinase 1 [Source:MGI Symbol;Acc:MGI:2443397]	Trib1	2.42299	2.25973	2.79539	5.09132	2.88324	3.13635		0.460129	0.0485623	0.0114467
	ENSMUSG00000048280	zinc finger protein 738 [Source:MGI Symbol;Acc:MGI:3040706]	Zfp738	6.8506	7.33536	6.16152	6.49166	5.5428	5.92634		-0.199084	0.0487318	0.0114931
	ENSMUSG00000070327	ring finger protein 213 [Source:MGI Symbol;Acc:MGI:1289196]	Rnf213	56.5024	52.1482	54.6203	39.5494	63.3909	41.4808		-0.272431	0.0488595	0.0115296
	ENSMUSG00000060147	serine (or cysteine) peptidase inhibitor, clade B, member 6a [Source:MGI Symbol;Acc:MGI:103123]	Serpinb6a	33.5213	35.14	36.7955	22.5988	34.2395	26.2504		-0.339522	0.0488956	0.0115488
	ENSMUSG00000039236	interferon-stimulated protein [Source:MGI Symbol;Acc:MGI:1928895]	Isg20	63.7985	54.1963	48.0424	38.2114	45.934	47.7921		-0.289723	0.0488956	0.0115509
	ENSMUSG00000044285	ubiquitin B, pseudogene [Source:MGI Symbol;Acc:MGI:3037679]	Ubb-ps	1.91494	4.5248	4.80065	5.02973	4.65566	6.30069		0.924493	0.0491288	0.0116125
*note: due to the design of the Pim1 KO read alignment to the Pim1 gene is detected. Pim1 protein deletion has been verifed in these mice.	ENSMUSG00000024014	proviral integration site 1 [Source:MGI Symbol;Acc:MGI:97584]	Pim1	216.071	221.491	188.561	186.589	165.887	189.252		-0.188622	0.0491591	0.0116261
	ENSMUSG00000021669	ceramide transporter 1 [Source:MGI Symbol;Acc:MGI:1915268]	Cert1	56.3881	51.8338	46.5555	48.6984	48.8238	46.0841		-0.152871	0.0491671	0.0116591
	ENSMUSG00000030432	ribosomal protein L28 [Source:MGI Symbol;Acc:MGI:101839]	Rpl28	1245.66	1271.61	1314.72	1400.05	1334.43	1375.45		0.137513	0.0491671	0.0116602
	ENSMUSG00000003184	interferon regulatory factor 3 [Source:MGI Symbol;Acc:MGI:1859179]	Irf3	66.5491	60.823	64.4903	70.3805	65.5287	71.3716		0.157015	0.0491671	0.0116543
	ENSMUSG00000061981	flotillin 2 [Source:MGI Symbol;Acc:MGI:103309]	Flot2	98.8997	95.3552	92.3533	111.835	99.0424	107.876		0.169223	0.0491671	0.0116567
	ENSMUSG00000085154	RIKEN cDNA C130046K22 gene [Source:MGI Symbol;Acc:MGI:3026935]	C130046K22Rik	4.47894	5.44976	5.46776	7.55765	7.15826	7.2983		0.565593	0.0491671	0.0116374
	ENSMUSG00000023034	nuclear receptor subfamily 4, group A, member 1 [Source:MGI Symbol;Acc:MGI:1352454]	Nr4a1	8.72813	10.5998	9.17341	24.9774	7.71571	14.9439		0.609895	0.0493204	0.011703
	ENSMUSG00000039137	whirlin [Source:MGI Symbol;Acc:MGI:2682003]	Whrn	0.745982	0.765592	0.442881	1.06117	0.775356	1.11907		0.611103	0.0493266	0.011711
	ENSMUSG00000003421	nitric oxide synthase interacting protein [Source:MGI Symbol;Acc:MGI:1913644]	Nosip	100.149	95.1554	95.8505	104.711	103.166	106.19		0.13603	0.0495437	0.011769
	ENSMUSG00000109511	nucleoporin 62 [Source:MGI Symbol;Acc:MGI:1351500]	Nup62	159.459	149.74	156.088	165.864	173.23	167.357		0.140497	0.0496903	0.0118103
	ENSMUSG00000023330	DTW domain containing 1 [Source:MGI Symbol;Acc:MGI:1916435]	Dtwd1	19.0637	19.2299	17.9771	14.9949	18.1042	14.2722		-0.317178	0.0497727	0.0118512
	ENSMUSG00000020248	nuclear transcription factor-Y beta [Source:MGI Symbol;Acc:MGI:97317]	Nfyb	41.4753	39.5414	37.6683	35.5756	36.6473	35.4259		-0.147253	0.0497727	0.0118575
	ENSMUSG00000032582	RNA binding motif protein 6 [Source:MGI Symbol;Acc:MGI:1338037]	Rbm6	32.7711	32.2705	27.8111	31.2683	28.6186	28.0595		-0.13166	0.0497727	0.0118625
	ENSMUSG00000023118	symplekin [Source:MGI Symbol;Acc:MGI:1915438]	Sympk	55.5178	52.9637	50.1552	59.15	54.8341	57.8342		0.122515	0.0497727	0.0118606
	ENSMUSG00000024330	collagen, type XI, alpha 2 [Source:MGI Symbol;Acc:MGI:88447]	Col11a2	4.06584	3.75451	4.2544	6.79587	4.36779	5.11221		0.393708	0.0497727	0.011859
	ENSMUSG00000038546	RAN binding protein 9 [Source:MGI Symbol;Acc:MGI:1928741]	Ranbp9	85.4666	87.3305	73.2583	79.2239	73.1275	76.056		-0.126554	0.0497805	0.0118709
	ENSMUSG00000091845	ribosomal protein L36, pseudogene 12 [Source:MGI Symbol;Acc:MGI:3782787]	Rpl36-ps12	5.07614	5.0605	8.5922	9.41141	8.37381	10.9475		0.887422	0.0498318	0.0118897
	ENSMUSG00000076474	T cell receptor beta, variable 17 [Source:MGI Symbol;Acc:MGI:98610]	Trbv17	148.212	146.132	151.23	131.151	131.544	122.939		-0.216797	0.0498603	0.0119161
	ENSMUSG00000029213	COMM domain containing 8 [Source:MGI Symbol;Acc:MGI:1343485]	Commd8	92.0108	89.6769	86.7341	69.3028	76.9268	81.6994		-0.165745	0.0498603	0.0119159
	ENSMUSG00000020105	leucine-rich repeats and immunoglobulin-like domains 3 [Source:MGI Symbol;Acc:MGI:2443955]	Lrig3	0.209271	0.200067	0.34063	1.17262	0.340768	0.393463		0.97483	0.0498603	0.0119051
	ENSMUSG00000031278	acyl-CoA synthetase long-chain family member 4 [Source:MGI Symbol;Acc:MGI:1354713]	Acsl4	103.762	99.2063	99.2897	82.3338	90.5154	89.6861		-0.164919	0.0499102	0.0119346
	ENSMUSG00000001156	MAX dimerization protein 1 [Source:MGI Symbol;Acc:MGI:96908]	Mxd1	11.9054	14.2541	11.5156	17.1116	12.1555	16.4243		0.329412	0.0499841	0.0119588
	ENSMUSG00000049038	mitochondrial transcription termination factor 2 [Source:MGI Symbol;Acc:MGI:1921488]	Mterf2	25.258	20.19	22.3722	22.3467	17.9188	17.371		-0.31748	0.0500347	0.0119775
	ENSMUSG00000066798	zinc finger and BTB domain containing 6 [Source:MGI Symbol;Acc:MGI:2442998]	Zbtb6	22.3048	21.4573	19.949	21.3912	19.0373	18.5115		-0.1663	0.0501108	0.0120154
	ENSMUSG00000027215	CD82 antigen [Source:MGI Symbol;Acc:MGI:104651]	Cd82	214.032	219.007	188.963	176.999	197.9	189.841		-0.139343	0.0501108	0.0120285
	ENSMUSG00000032977	family with sequence similarity 207, member A [Source:MGI Symbol;Acc:MGI:1916334]	Fam207a	57.9872	54.8551	65.2703	65.7224	62.3672	65.7093		0.192236	0.0501108	0.0120108
	ENSMUSG00000020219	translocase of inner mitochondrial membrane 13 [Source:MGI Symbol;Acc:MGI:1353432]	Timm13	95.1326	99.106	129.171	102.626	126.556	122.969		0.272059	0.0501108	0.0120082
	ENSMUSG00000026791	solute carrier family 2, (facilitated glucose transporter), member 8 [Source:MGI Symbol;Acc:MGI:1860103]	Slc2a8	3.91925	4.63629	4.11366	5.51103	4.79302	5.93598		0.450965	0.0501108	0.0120231
	ENSMUSG00000035683	maternal embryonic leucine zipper kinase [Source:MGI Symbol;Acc:MGI:106924]	Melk	69.1192	70.5949	60.578	60.2909	64.7613	59.3049		-0.155318	0.0501324	0.0120403
	ENSMUSG00000062867	inosine monophosphate dehydrogenase 2 [Source:MGI Symbol;Acc:MGI:109367]	Impdh2	197.33	194.937	197.016	215.692	216.071	207.849		0.121306	0.050142	0.0120492
	ENSMUSG00000020828	phospholipase D2 [Source:MGI Symbol;Acc:MGI:892877]	Pld2	3.74392	2.98676	3.02099	1.63672	2.59494	2.50398		-0.455194	0.0501458	0.0120611
	ENSMUSG00000028648	NADH:ubiquinone oxidoreductase core subunit S5 [Source:MGI Symbol;Acc:MGI:1890889]	Ndufs5	40.4876	41.4843	40.9719	31.8157	42.0167	31.4421		-0.283737	0.0501458	0.0120698
	ENSMUSG00000040663	cardiotrophin-like cytokine factor 1 [Source:MGI Symbol;Acc:MGI:1930088]	Clcf1	31.6068	31.432	24.5456	43.8065	27.458	38.6871		0.313508	0.0501458	0.0120671
	ENSMUSG00000085498	predicted gene 14023 [Source:MGI Symbol;Acc:MGI:3650639]	Gm14023	1.17695	0.852414	0.684183	0.624513	0.887265	0.30734		-1.15916	0.0501543	0.012136
	ENSMUSG00000086825	predicted gene 15675 [Source:MGI Symbol;Acc:MGI:3783117]	Gm15675	2.49925	2.3096	1.43447	1.26908	1.11616	1.51676		-0.626865	0.0501543	0.012082
	ENSMUSG00000097352	RIKEN cDNA C920009B18 gene [Source:MGI Symbol;Acc:MGI:3583961]	C920009B18Rik	9.3673	11.3098	8.63219	9.08242	8.47406	8.03881		-0.243424	0.0501543	0.0121258
	ENSMUSG00000014177	trans-golgi network vesicle protein 23B [Source:MGI Symbol;Acc:MGI:1914760]	Tvp23b	30.1682	29.5479	28.6686	26.0273	28.0456	24.7359		-0.200648	0.0501543	0.0121009
	ENSMUSG00000028572	hook microtubule tethering protein 1 [Source:MGI Symbol;Acc:MGI:1925213]	Hook1	14.4481	15.3129	12.7937	13.3851	13.8302	11.9503		-0.197698	0.0501543	0.0121212
	ENSMUSG00000024160	splA/ryanodine receptor domain and SOCS box containing 3 [Source:MGI Symbol;Acc:MGI:1891471]	Spsb3	43.0005	44.947	41.753	46.102	45.4093	48.5569		0.153893	0.0501543	0.0121229
	ENSMUSG00000035397	Kruppel-like factor 16 [Source:MGI Symbol;Acc:MGI:2153049]	Klf16	39.4562	37.6415	44.886	53.0756	41.6822	46.672		0.253906	0.0501543	0.0121376
	ENSMUSG00000001750	T cell, immune regulator 1, ATPase, H+ transporting, lysosomal V0 protein A3 [Source:MGI Symbol;Acc:MGI:1350931]	Tcirg1	41.5161	37.2034	34.8555	45.742	34.971	49.065		0.26777	0.0501543	0.0121218
	ENSMUSG00000035547	calpain 5 [Source:MGI Symbol;Acc:MGI:1100859]	Capn5	0.339697	0.30446	0.592418	1.05446	0.49937	0.678603		0.92186	0.0501543	0.0120878
	ENSMUSG00000025265	FYVE, RhoGEF and PH domain containing 1 [Source:MGI Symbol;Acc:MGI:104566]	Fgd1	0.188931	0.123151	0.20593	0.338346	0.53411	0.310818		1.03431	0.0501543	0.0121303
	ENSMUSG00000040856	delta like non-canonical Notch ligand 1 [Source:MGI Symbol;Acc:MGI:94900]	Dlk1	0.144099	0.107347	0.197452	0.353909	0.260716	0.328985		1.17668	0.0502419	0.0121654
	ENSMUSG00000056608	chromodomain helicase DNA binding protein 9 [Source:MGI Symbol;Acc:MGI:1924001]	Chd9	5.5238	5.99442	5.79927	9.38413	6.6673	6.31839		0.244789	0.0502777	0.0121806
	ENSMUSG00000042133	peptidyl-prolyl isomerase G (cyclophilin G) [Source:MGI Symbol;Acc:MGI:2445173]	Ppig	69.1374	69.7765	68.2879	63.6788	65.8392	61.9889		-0.117891	0.0503283	0.0122061
	ENSMUSG00000032998	forkhead box J3 [Source:MGI Symbol;Acc:MGI:2443432]	Foxj3	25.1944	22.9389	24.6157	30.3785	24.9713	26.9471		0.180613	0.0503283	0.0122044
	ENSMUSG00000000131	exportin 6 [Source:MGI Symbol;Acc:MGI:2429950]	Xpo6	35.686	36.554	34.5622	39.3037	36.8905	38.0767		0.106886	0.0503621	0.0122274
	ENSMUSG00000106028	predicted gene 8493 [Source:MGI Symbol;Acc:MGI:3779800]	Gm8493	3.81031	4.34644	5.39908	6.59621	4.52414	9.85047		0.946131	0.0503621	0.0122275
	ENSMUSG00000086652	predicted gene 14029 [Source:MGI Symbol;Acc:MGI:3650450]	Gm14029	61.5091	56.4238	51.6761	44.3088	51.7362	44.9918		-0.309136	0.0504469	0.0122787
	ENSMUSG00000046865	fibrillarin [Source:MGI Symbol;Acc:MGI:95486]	Fbl	94.1525	92.2287	103.933	102.188	112.882	102.712		0.16032	0.0504469	0.0122644
	ENSMUSG00000037295	low density lipoprotein receptor adaptor protein 1 [Source:MGI Symbol;Acc:MGI:2140175]	Ldlrap1	25.9651	27.7208	24.1041	31.7493	24.481	31.7492		0.228557	0.0504469	0.0122811
	ENSMUSG00000026153	family with sequence similarity 135, member A [Source:MGI Symbol;Acc:MGI:1915437]	Fam135a	0.0599267	0.0585932	0.0653185	0.18602	0.230402	0.126756		1.19794	0.0504469	0.0122726
	ENSMUSG00000030499	potassium channel tetramerisation domain containing 15 [Source:MGI Symbol;Acc:MGI:2385276]	Kctd15	0.164869	0.179111	0.311485	1.33849	0.472301	0.516633		1.54387	0.0504469	0.0122665
	ENSMUSG00000022322	Shc SH2-domain binding protein 1 [Source:MGI Symbol;Acc:MGI:1338802]	Shcbp1	53.5922	50.9587	50.5866	40.7445	51.126	45.2159		-0.169451	0.0504538	0.0122961
	ENSMUSG00000040356	superkiller viralicidic activity 2-like (S. cerevisiae) [Source:MGI Symbol;Acc:MGI:1099835]	Skiv2l	81.3787	80.4982	73.0416	81.3912	79.9053	88.1823		0.129766	0.0504538	0.0122897
	ENSMUSG00000038217	TLC domain containing 2 [Source:MGI Symbol;Acc:MGI:1917141]	Tlcd2	0.842115	1.01942	0.891659	0.344708	0.979475	0.282734		-1.25612	0.0506857	0.0123664
	ENSMUSG00000025651	ubiquinol-cytochrome c reductase core protein 1 [Source:MGI Symbol;Acc:MGI:107876]	Uqcrc1	135.603	138.671	140.271	142.751	151.767	148.817		0.133373	0.0506857	0.0123707
	ENSMUSG00000068206	protein interacting with C kinase 1 [Source:MGI Symbol;Acc:MGI:894645]	Pick1	1.84255	2.30967	2.20916	3.35048	2.40411	2.69814		0.417008	0.0506857	0.0123792
	ENSMUSG00000107111	predicted gene, 40304 [Source:MGI Symbol;Acc:MGI:5623189]	Gm40304	0	0	0.378896	0	0.393089	1.22546		1.80448	0.0506857	0.0123766
	ENSMUSG00000116220	RIKEN cDNA A430088P11 gene [Source:MGI Symbol;Acc:MGI:3605804]	A430088P11Rik	8.38086	7.68854	5.59373	5.70705	5.59266	6.17649		-0.313566	0.0507417	0.0124057
	ENSMUSG00000003360	DEAD box helicase 23 [Source:MGI Symbol;Acc:MGI:1921601]	Ddx23	76.8934	73.2387	71.7444	80.4596	75.2268	80.3352		0.113553	0.0507417	0.0124128
	ENSMUSG00000041995	zinc finger, BED type containing 3 [Source:MGI Symbol;Acc:MGI:1919364]	Zbed3	29.9613	29.3286	28.9021	31.6078	31.7319	34.5942		0.210798	0.0507417	0.0124064
	ENSMUSG00000048100	TATA-box binding protein associated factor 13 [Source:MGI Symbol;Acc:MGI:1913500]	Taf13	20.3377	19.0069	20.4698	14.8418	18.1312	16.586		-0.236152	0.0508616	0.0124488
	ENSMUSG00000079018	lymphocyte antigen 6 complex, locus C1 [Source:MGI Symbol;Acc:MGI:96882]	Ly6c1	2.49988	3.07794	3.14866	1.19384	2.70123	1.56672		-0.722	0.0510002	0.0125161
	ENSMUSG00000021203	OTU domain, ubiquitin aldehyde binding 2 [Source:MGI Symbol;Acc:MGI:1915399]	Otub2	1.85946	1.93107	1.86874	1.20407	1.79619	1.21474		-0.513667	0.0510002	0.012514
	ENSMUSG00000032002	DCN1, defective in cullin neddylation 1, domain containing 5 (S. cerevisiae) [Source:MGI Symbol;Acc:MGI:1924113]	Dcun1d5	92.0796	91.5724	97.8151	80.5365	88.9141	80.0868		-0.162648	0.0510002	0.0124956
	ENSMUSG00000079139	predicted gene 4204 [Source:MGI Symbol;Acc:MGI:3782381]	Gm4204	91.3836	90.5216	95.3575	115.021	98.1593	100.404		0.17161	0.0510002	0.0124983
	ENSMUSG00000051557	pseudouridylate synthase-like 1 [Source:MGI Symbol;Acc:MGI:3047787]	Pusl1	28.7506	24.5746	29.3863	36.8205	30.5776	30.7412		0.226966	0.0510002	0.0125146
	ENSMUSG00000039164	nuclear apoptosis inducing factor 1 [Source:MGI Symbol;Acc:MGI:1918504]	Naif1	8.81533	8.913	6.94431	6.76922	7.6802	6.56847		-0.305369	0.0511092	0.0125898
	ENSMUSG00000034109	golgi integral membrane protein 4 [Source:MGI Symbol;Acc:MGI:1920374]	Golim4	28.5767	26.436	23.0474	21.5781	25.6424	23.0181		-0.181745	0.0511092	0.0125856
	ENSMUSG00000026088	MIT, microtubule interacting and transport, domain containing 1 [Source:MGI Symbol;Acc:MGI:1916278]	Mitd1	56.8389	57.4923	54.0347	44.0888	48.6426	51.1803		-0.163504	0.0511092	0.0125547
	ENSMUSG00000061244	exocyst complex component 5 [Source:MGI Symbol;Acc:MGI:2145645]	Exoc5	25.9862	25.3278	24.2853	22.9216	23.5434	22.7859		-0.128012	0.0511092	0.0125683
	ENSMUSG00000024312	WD repeat domain 46 [Source:MGI Symbol;Acc:MGI:1931871]	Wdr46	75.4583	68.9446	70.6486	78.8474	80.114	79.6902		0.165821	0.0511092	0.0125821
	ENSMUSG00000070462	talin rod domain containing 1 [Source:MGI Symbol;Acc:MGI:1891420]	Tlnrd1	18.2047	15.8904	18.5313	19.4701	22.0059	20.1267		0.250638	0.0511092	0.0125842
	ENSMUSG00000069310	H3 clustered histone 3 [Source:MGI Symbol;Acc:MGI:2448320]	H3c3	2.77268	4.81952	7.41434	4.76682	6.1871	9.38353		0.998566	0.0511092	0.0125825
	ENSMUSG00000027669	guanine nucleotide binding protein (G protein), beta 4 [Source:MGI Symbol;Acc:MGI:104581]	Gnb4	3.4866	3.77982	3.32827	2.92699	3.76836	2.66527		-0.292869	0.0511164	0.0125983
	ENSMUSG00000040016	prostaglandin E receptor 3 (subtype EP3) [Source:MGI Symbol;Acc:MGI:97795]	Ptger3	1.74024	2.85587	2.30295	0.606188	2.33366	1.19329		-0.801194	0.0511573	0.0126352
	ENSMUSG00000015542	N-acetyltransferase 9 (GCN5-related, putative) [Source:MGI Symbol;Acc:MGI:1913426]	Nat9	7.04577	8.52397	5.70142	6.02966	6.4249	4.92794		-0.437651	0.0511573	0.0126309
	ENSMUSG00000042599	lysine (K)-specific demethylase 7A [Source:MGI Symbol;Acc:MGI:2443388]	Kdm7a	15.7825	16.288	12.2576	17.0317	12.1616	12.0393		-0.261256	0.0511573	0.0126232
	ENSMUSG00000022708	zinc finger and BTB domain containing 20 [Source:MGI Symbol;Acc:MGI:1929213]	Zbtb20	1.41729	1.31906	1.29532	2.80145	1.97463	1.59598		0.407519	0.0511573	0.0126181
	ENSMUSG00000078762	HAUS augmin-like complex, subunit 5 [Source:MGI Symbol;Acc:MGI:1919159]	Haus5	5.05583	4.35012	3.61503	5.7303	4.66519	6.4956		0.43617	0.0512637	0.0126682
	ENSMUSG00000019189	ring finger protein 145 [Source:MGI Symbol;Acc:MGI:1921565]	Rnf145	123.004	116.757	100.788	90.9977	98.1633	106.845		-0.156234	0.0512745	0.0126776
	ENSMUSG00000021287	X-ray repair complementing defective repair in Chinese hamster cells 3 [Source:MGI Symbol;Acc:MGI:1921585]	Xrcc3	16.0493	14.2982	15.287	16.0569	17.4686	18.551		0.26124	0.0512772	0.012685
	ENSMUSG00000021786	3-oxoacyl-ACP synthase, mitochondrial [Source:MGI Symbol;Acc:MGI:1918397]	Oxsm	31.3081	28.8908	24.4198	22.8383	26.6881	24.8939		-0.204644	0.0512782	0.0126924
	ENSMUSG00000015668	PDZ domain containing 11 [Source:MGI Symbol;Acc:MGI:1919871]	Pdzd11	48.0155	44.3953	44.0168	40.5265	40.7127	40.2488		-0.165625	0.0512782	0.0126986
	ENSMUSG00000029404	ADP-ribosylation factor-like 6 interacting protein 4 [Source:MGI Symbol;Acc:MGI:1929500]	Arl6ip4	127.759	131.285	143.936	141.153	136.762	147.738		0.16147	0.0515223	0.0127726
	ENSMUSG00000007207	syntaxin 1A (brain) [Source:MGI Symbol;Acc:MGI:109355]	Stx1a	13.9778	13.8376	11.5028	25.2824	12.0127	19.3818		0.473639	0.0515223	0.0127667
	ENSMUSG00000056211	R3H domain containing 1 [Source:MGI Symbol;Acc:MGI:2448514]	R3hdm1	12.3384	11.9722	11.4393	13.6886	11.9347	13.115		0.129293	0.0516546	0.0128122
	ENSMUSG00000105100	NA	NA	8.52092	19.7483	12.3834	18.0855	13.7038	30.2613		0.981993	0.0517263	0.0128367
	ENSMUSG00000062373	transmembrane protein 65 [Source:MGI Symbol;Acc:MGI:1922118]	Tmem65	12.6314	12.4707	13.6391	16.1036	13.4316	14.2008		0.187784	0.0517753	0.0128557
	ENSMUSG00000018334	kinase suppressor of ras 1 [Source:MGI Symbol;Acc:MGI:105051]	Ksr1	9.18111	9.2974	9.14941	11.0396	9.68495	10.7887		0.225483	0.0517772	0.0128629
	ENSMUSG00000059208	heterogeneous nuclear ribonucleoprotein M [Source:MGI Symbol;Acc:MGI:1926465]	Hnrnpm	200.338	190.78	196.043	205.969	212.232	210.707		0.127137	0.0517941	0.0128834
	ENSMUSG00000010663	fatty acid desaturase 1 [Source:MGI Symbol;Acc:MGI:1923517]	Fads1	35.6715	34.3887	34.46	32.568	37.5023	40.4046		0.172339	0.0517941	0.0128943
	ENSMUSG00000073423	zinc finger protein 414 [Source:MGI Symbol;Acc:MGI:1915641]	Zfp414	27.0668	29.2631	26.1414	33.2382	26.9843	32.4317		0.207891	0.0517941	0.0128804
	ENSMUSG00000068396	ribosomal protein L34, pseudogene 1 [Source:MGI Symbol;Acc:MGI:3704270]	Rpl34-ps1	15.7902	12.4368	12.6213	28.9061	17.558	19.792		0.558961	0.0517941	0.0128935
	ENSMUSG00000002205	vaccinia related kinase 3 [Source:MGI Symbol;Acc:MGI:2182465]	Vrk3	36.2792	38.6966	29.7827	32.5563	31.5388	31.6866		-0.160598	0.0518827	0.0129232
	ENSMUSG00000106499	predicted gene 9403 [Source:MGI Symbol;Acc:MGI:3648825]	Gm9403	0.533941	0.904903	0.791495	0.917956	0.966052	1.40545		0.837381	0.0519992	0.012959
	ENSMUSG00000029705	cut-like homeobox 1 [Source:MGI Symbol;Acc:MGI:88568]	Cux1	11.0323	11.0995	10.4465	12.5368	11.606	11.7763		0.133133	0.0520115	0.0129689
	ENSMUSG00000022476	polymerase (RNA) III (DNA directed) polypeptide H [Source:MGI Symbol;Acc:MGI:1926179]	Polr3h	17.406	15.7868	19.5113	19.0762	20.7699	19.5216		0.223162	0.0520117	0.0129758
	ENSMUSG00000020048	heat shock protein 90, beta (Grp94), member 1 [Source:MGI Symbol;Acc:MGI:98817]	Hsp90b1	606.755	607.561	523.965	455.027	581.217	508.085		-0.189616	0.0520495	0.0129984
	ENSMUSG00000044340	PH domain and leucine rich repeat protein phosphatase 1 [Source:MGI Symbol;Acc:MGI:2138327]	Phlpp1	10.7967	10.2754	9.94086	14.5621	10.7345	12.2737		0.250178	0.0520495	0.0130057
	ENSMUSG00000020541	target of myb1-like 1 (chicken) [Source:MGI Symbol;Acc:MGI:1919193]	Tom1l1	0	0	0.0131042	0.0143536	0	0.0847654		2.35664	0.0520495	0.0130015
	ENSMUSG00000043067	dpy-19-like 1 (C. elegans) [Source:MGI Symbol;Acc:MGI:1915685]	Dpy19l1	90.2095	84.3947	75.9902	66.5252	85.2904	73.7876		-0.173633	0.0520931	0.0130234
	ENSMUSG00000003955	family with sequence similarity 162, member A [Source:MGI Symbol;Acc:MGI:1917436]	Fam162a	184.817	173.248	222.083	116.329	184.545	148.757		-0.289371	0.0520939	0.0130372
	ENSMUSG00000026011	cytotoxic T-lymphocyte-associated protein 4 [Source:MGI Symbol;Acc:MGI:88556]	Ctla4	84.9154	108.942	93.0894	151.229	102.364	110.32		0.277473	0.0520939	0.0130357
	ENSMUSG00000026036	Ngg1 interacting factor 3-like 1 (S. pombe) [Source:MGI Symbol;Acc:MGI:1929485]	Nif3l1	10.6357	9.83677	9.745	7.83724	9.36366	8.47536		-0.232333	0.0521112	0.013055
	ENSMUSG00000061186	Scm-like with four mbt domains 2 [Source:MGI Symbol;Acc:MGI:2447794]	Sfmbt2	1.67126	1.31391	1.71317	2.54669	1.68501	2.17078		0.481772	0.0521112	0.0130552
	ENSMUSG00000039810	zinc finger CCCH type containing 10 [Source:MGI Symbol;Acc:MGI:2143670]	Zc3h10	18.4082	18.2496	17.6498	19.0535	20.0892	20.8012		0.187915	0.052115	0.0130699
	ENSMUSG00000069274	H4 clustered histone 6 [Source:MGI Symbol;Acc:MGI:2448425]	H4c6	3.27616	1.94137	5.45378	9.6718	2.69432	10.6395		1.46351	0.052115	0.0130697
	ENSMUSG00000003039	family with sequence similarity 32, member A [Source:MGI Symbol;Acc:MGI:1915172]	Fam32a	80.9542	83.9131	68.7479	77.3207	71.7054	67.4625		-0.184972	0.0521402	0.013083
	ENSMUSG00000051989	small integral membrane protein 11 [Source:MGI Symbol;Acc:MGI:1916186]	Smim11	72.2437	68.7228	68.5319	58.0159	62.6452	60.1434		-0.199836	0.0523276	0.0131369
	ENSMUSG00000067071	hairy and enhancer of split 6 [Source:MGI Symbol;Acc:MGI:1859852]	Hes6	31.4319	31.908	34.3161	41.9557	32.2803	37.42		0.227338	0.0523655	0.0131533
	ENSMUSG00000024790	SAC3 domain containing 1 [Source:MGI Symbol;Acc:MGI:1913656]	Sac3d1	32.2223	28.11	34.4349	34.4013	37.0398	37.4278		0.27461	0.0523686	0.0131609
	ENSMUSG00000032009	sestrin 3 [Source:MGI Symbol;Acc:MGI:1922997]	Sesn3	74.3072	75.7831	62.5399	68.6119	64.5583	63.4377		-0.16152	0.052526	0.0132074
	ENSMUSG00000116868	predicted gene, 29721 [Source:MGI Symbol;Acc:MGI:5588880]	Gm29721	0.472904	0.770634	0.515453	0.338759	0.320857	0.111142		-1.56408	0.0525681	0.0132317
	ENSMUSG00000022750	kelch-like 22 [Source:MGI Symbol;Acc:MGI:1337995]	Klhl22	5.76255	4.84392	4.79202	7.20396	5.65586	6.48397		0.311766	0.0525681	0.0132295
	ENSMUSG00000036977	anaphase promoting complex subunit 10 [Source:MGI Symbol;Acc:MGI:1916249]	Anapc10	10.4487	9.44723	10.4966	7.79523	9.80082	7.85356		-0.284102	0.0526451	0.0132648
	ENSMUSG00000051390	zinc finger and BTB domain containing 22 [Source:MGI Symbol;Acc:MGI:1931870]	Zbtb22	42.085	40.4385	37.7989	44.6484	44.2595	44.7646		0.154581	0.0526451	0.0132718
	ENSMUSG00000051817	SRY (sex determining region Y)-box 12 [Source:MGI Symbol;Acc:MGI:98360]	Sox12	2.87666	2.11375	2.5768	4.47101	2.88624	3.41724		0.461822	0.0526451	0.0132707
	ENSMUSG00000052928	CBP80/20-dependent translation initiation factor [Source:MGI Symbol;Acc:MGI:2685518]	Ctif	0.457898	0.4298	0.239566	0.104963	0.298248	0.189402		-1.02498	0.0526863	0.0132891
	ENSMUSG00000067787	bladder cancer associated protein [Source:MGI Symbol;Acc:MGI:1858907]	Blcap	19.058	17.3118	18.7204	23.0273	20.9103	20.9739		0.230616	0.0527123	0.0133026
	ENSMUSG00000112148	leukocyte immunoglobulin-like receptor, subfamily B, member 4A [Source:MGI Symbol;Acc:MGI:102701]	Lilrb4a	10.6494	11.4725	8.27584	6.34116	6.32854	8.52423		-0.405493	0.0528946	0.0133711
	ENSMUSG00000030157	C-type lectin domain family 2, member d [Source:MGI Symbol;Acc:MGI:2135589]	Clec2d	244.906	259.95	263.027	237.948	219.033	213.985		-0.197497	0.0528946	0.0133758
	ENSMUSG00000024952	NA	NA	25.1045	24.0708	27.568	23.6374	28.9817	30.6955		0.249979	0.0528946	0.0133691
	ENSMUSG00000027947	interleukin 6 receptor, alpha [Source:MGI Symbol;Acc:MGI:105304]	Il6ra	7.74823	6.13092	5.81629	12.2655	6.26578	9.03209		0.399783	0.0528946	0.0133763
	ENSMUSG00000114279	H2B clustered histone 14 [Source:MGI Symbol;Acc:MGI:2448404]	H2bc14	4.00028	4.63557	6.20117	3.39621	8.04183	10.0282		0.891647	0.0529224	0.0133903
	ENSMUSG00000026923	notch 1 [Source:MGI Symbol;Acc:MGI:97363]	Notch1	40.4458	38.7217	36.8661	44.5231	46.0786	41.1145		0.134651	0.0530348	0.0134257
	ENSMUSG00000024759	atlastin GTPase 3 [Source:MGI Symbol;Acc:MGI:1924270]	Atl3	101.958	99.5463	86.9445	95.179	96.4916	85.1059		-0.138112	0.0530448	0.0134352
	ENSMUSG00000015932	destrin [Source:MGI Symbol;Acc:MGI:1929270]	Dstn	79.5241	82.1437	88.8977	71.997	71.0589	69.6031		-0.202815	0.0531391	0.013466
	ENSMUSG00000071074	Yip1 domain family, member 3 [Source:MGI Symbol;Acc:MGI:106280]	Yipf3	66.7235	65.5064	59.1241	77.73	63.8816	71.3434		0.145018	0.0531942	0.0134869
	ENSMUSG00000044927	H1.10 linker histone [Source:MGI Symbol;Acc:MGI:2685307]	H1f10	0.382753	0.748471	0.917819	1.82787	1.12533	1.34932		1.19159	0.0531992	0.0134952
	ENSMUSG00000032561	acid phosphatase, prostate [Source:MGI Symbol;Acc:MGI:1928480]	Acpp	25.5783	22.2234	16.042	6.44897	12.2451	14.741		-0.782847	0.0532438	0.0135135
	ENSMUSG00000017390	aldolase C, fructose-bisphosphate [Source:MGI Symbol;Acc:MGI:101863]	Aldoc	23.1977	22.286	28.4436	3.71548	18.9517	15.9699		-0.765869	0.0533055	0.0135361
	ENSMUSG00000057396	zinc finger protein 759 [Source:MGI Symbol;Acc:MGI:2446280]	Zfp759	5.05779	5.22668	4.67921	4.2122	4.96608	3.50806		-0.383186	0.0533452	0.0135602
	ENSMUSG00000030779	retinoblastoma binding protein 6, ubiquitin ligase [Source:MGI Symbol;Acc:MGI:894835]	Rbbp6	47.6991	48.5361	47.0492	57.5721	47.7594	52.7156		0.151276	0.0533452	0.013559
	ENSMUSG00000022607	PTK2 protein tyrosine kinase 2 [Source:MGI Symbol;Acc:MGI:95481]	Ptk2	0.138129	0.257248	0.0774293	0.0565411	0.116032	0.0556509		-1.24342	0.0534386	0.0135969
	ENSMUSG00000019810	fucosidase, alpha-L- 2, plasma [Source:MGI Symbol;Acc:MGI:1914098]	Fuca2	30.0913	31.0973	24.871	24.4079	28.1794	24.148		-0.229069	0.0534386	0.013598
	ENSMUSG00000103940	predicted gene, 38227 [Source:MGI Symbol;Acc:MGI:5611455]	Gm38227	1.01769	0.852892	0.190158	0.833151	0.328801	0.136672		-1.66468	0.0534746	0.0136206
	ENSMUSG00000014498	ankyrin repeat domain 52 [Source:MGI Symbol;Acc:MGI:2444029]	Ankrd52	71.8454	62.6704	66.1893	69.3092	74.3994	74.486		0.15975	0.0534746	0.0136211
	ENSMUSG00000024414	mitochondrial ribosomal protein L27 [Source:MGI Symbol;Acc:MGI:2137224]	Mrpl27	102.384	98.9494	99.1731	74.301	109.84	78.5772		-0.260391	0.0535275	0.0136416
	ENSMUSG00000037656	solute carrier family 20, member 2 [Source:MGI Symbol;Acc:MGI:97851]	Slc20a2	7.99955	7.20486	7.62888	8.57097	7.79602	9.08766		0.222653	0.0535524	0.013655
	ENSMUSG00000041477	decapping mRNA 1B [Source:MGI Symbol;Acc:MGI:2442404]	Dcp1b	8.89147	8.43017	8.76237	11.2647	9.47284	9.86117		0.216317	0.0535645	0.0136651
	ENSMUSG00000079553	kinesin family member C1 [Source:MGI Symbol;Acc:MGI:109596]	Kifc1	94.3832	92.3607	90.0037	94.1216	97.541	104.44		0.155741	0.0537366	0.0137161
	ENSMUSG00000021376	thiopurine methyltransferase [Source:MGI Symbol;Acc:MGI:98812]	Tpmt	1.13859	1.19572	1.21346	0.483327	1.00141	0.654112		-0.756926	0.0537435	0.0137248
	ENSMUSG00000015950	neutrophil cytosolic factor 1 [Source:MGI Symbol;Acc:MGI:97283]	Ncf1	59.8	61.9196	36.5648	55.5673	36.9566	43.3355		-0.342877	0.0538887	0.013769
	ENSMUSG00000054626	X-linked lymphocyte-regulated [Source:MGI Symbol;Acc:MGI:98976]	Xlr	3.29441	4.29481	3.13381	2.62212	2.75449	0.985412		-1.39391	0.0539284	0.0138217
	ENSMUSG00000106317	predicted gene 43848 [Source:MGI Symbol;Acc:MGI:5663985]	Gm43848	4.38915	2.55663	3.01294	1.6947	1.94307	2.01918		-0.753702	0.0539284	0.0139099
	ENSMUSG00000033126	ybeY metallopeptidase [Source:MGI Symbol;Acc:MGI:2656825]	Ybey	4.18747	4.04769	3.93637	2.94599	3.73273	3.18765		-0.313428	0.0539284	0.0139036
	ENSMUSG00000073987	gamma-glutamyl hydrolase [Source:MGI Symbol;Acc:MGI:1329035]	Ggh	44.9216	39.3251	44.2867	30.0564	43.8548	34.263		-0.256412	0.0539284	0.0139021
	ENSMUSG00000030208	epithelial membrane protein 1 [Source:MGI Symbol;Acc:MGI:107941]	Emp1	58.6481	66.0465	57.1282	47.9386	60.564	50.4856		-0.221065	0.0539284	0.0139418
	ENSMUSG00000025724	SEC11 homolog A, signal peptidase complex subunit [Source:MGI Symbol;Acc:MGI:1929464]	Sec11a	105.877	109.172	101.236	91.0971	93.4523	95.9504		-0.143517	0.0539284	0.0139209
	ENSMUSG00000050565	torsin A interacting protein 2 [Source:MGI Symbol;Acc:MGI:3582695]	Tor1aip2	45.1257	46.7566	37.7734	39.9269	40.2398	39.6545		-0.140358	0.0539284	0.0138107
	ENSMUSG00000039968	round spermatid basic protein 1-like [Source:MGI Symbol;Acc:MGI:3036237]	Rsbn1l	34.7079	34.217	31.4021	31.7988	30.3262	30.3914		-0.130971	0.0539284	0.0137891
	ENSMUSG00000035248	terminal uridylyl transferase 7 [Source:MGI Symbol;Acc:MGI:2387179]	Tut7	35.4132	36.2225	30.5556	33.9219	30.8707	31.3814		-0.122606	0.0539284	0.0138434
	ENSMUSG00000025078	NHL repeat containing 2 [Source:MGI Symbol;Acc:MGI:1914116]	Nhlrc2	20.09	19.3643	18.1703	23.5899	19.6606	21.2093		0.144406	0.0539284	0.013839
	ENSMUSG00000026770	interleukin 2 receptor, alpha chain [Source:MGI Symbol;Acc:MGI:96549]	Il2ra	214.757	219.814	192.456	297.18	245.91	224.892		0.171399	0.0539284	0.0139083
	ENSMUSG00000061518	cytochrome c oxidase subunit 5B [Source:MGI Symbol;Acc:MGI:88475]	Cox5b	227.475	210.264	255.428	226.166	248.865	254.406		0.176522	0.0539284	0.0138572
	ENSMUSG00000029056	pantothenate kinase 4 [Source:MGI Symbol;Acc:MGI:2387466]	Pank4	34.7654	36.9632	32.9356	45.4217	34.8038	39.5892		0.181522	0.0539284	0.013844
	ENSMUSG00000002825	queuine tRNA-ribosyltransferase catalytic subunit 1 [Source:MGI Symbol;Acc:MGI:1931441]	Qtrt1	35.827	36.6264	39.5266	42.1113	41.114	41.3928		0.195757	0.0539284	0.0139417
	ENSMUSG00000044345	MARVEL (membrane-associating) domain containing 1 [Source:MGI Symbol;Acc:MGI:2147570]	Marveld1	13.6096	12.8041	11.7493	15.3245	13.3398	14.9052		0.197667	0.0539284	0.0138643
	ENSMUSG00000051518	ribosomal protein S19 binding protein 1 [Source:MGI Symbol;Acc:MGI:1913788]	Rps19bp1	37.9573	33.6432	40.3176	43.7508	39.4933	43.2642		0.237496	0.0539284	0.0138745
	ENSMUSG00000035585	tRNA splicing endonuclease subunit 34 [Source:MGI Symbol;Acc:MGI:1913328]	Tsen34	15.7653	16.8484	17.7033	19.6976	17.8275	19.5598		0.246933	0.0539284	0.0139393
	ENSMUSG00000037138	AF4/FMR2 family, member 3 [Source:MGI Symbol;Acc:MGI:106927]	Aff3	25.0441	25.5763	23.7303	36.2395	23.9384	30.3548		0.27354	0.0539284	0.0139018
	ENSMUSG00000033863	Kruppel-like factor 9 [Source:MGI Symbol;Acc:MGI:1333856]	Klf9	5.97379	6.55815	5.92605	15.8927	6.47622	8.02586		0.469958	0.0539284	0.0138633
	ENSMUSG00000104623	predicted gene 6394 [Source:MGI Symbol;Acc:MGI:3648319]	Gm6394	12.4509	19.4145	15.7532	26.5822	18.331	21.5736		0.516698	0.0539284	0.0138908
	ENSMUSG00000034265	zinc finger, DHHC domain containing 14 [Source:MGI Symbol;Acc:MGI:2653229]	Zdhhc14	1.89169	1.92358	1.88045	4.80605	2.2247	2.95204		0.66705	0.0539284	0.0139361
	ENSMUSG00000021375	kinesin family member 13A [Source:MGI Symbol;Acc:MGI:1098264]	Kif13a	0.666334	0.665368	0.642841	2.1124	1.03886	0.986257		0.740581	0.0539284	0.0139168
	ENSMUSG00000091742	predicted gene 5093 [Source:MGI Symbol;Acc:MGI:3644404]	Gm5093	3.58316	4.67123	3.71027	6.84466	5.67258	7.36848		0.810602	0.0539284	0.0137997
	ENSMUSG00000029390	transmembrane p24 trafficking protein 2 [Source:MGI Symbol;Acc:MGI:1929269]	Tmed2	108.065	113.245	108.416	96.3047	107.349	96.348		-0.143946	0.0539641	0.0139581
	ENSMUSG00000018040	ribosomal RNA processing 7 homolog A [Source:MGI Symbol;Acc:MGI:1922028]	Rrp7a	58.1725	58.3299	64.0868	59.8987	69.3688	64.6205		0.154377	0.054279	0.0140466
	ENSMUSG00000032412	ATPase, Na+/K+ transporting, beta 3 polypeptide [Source:MGI Symbol;Acc:MGI:107788]	Atp1b3	824.722	775.597	676.763	733.652	741.889	686.908		-0.130817	0.0543208	0.0140717
	ENSMUSG00000021485	Max dimerization protein 3 [Source:MGI Symbol;Acc:MGI:104987]	Mxd3	79.29	77.2852	81.1411	82.0695	91.9182	90.8514		0.211686	0.0543208	0.0140651
	ENSMUSG00000028657	palmitoyl-protein thioesterase 1 [Source:MGI Symbol;Acc:MGI:1298204]	Ppt1	58.4481	59.1309	55.8576	56.5211	55.2833	50.8041		-0.1358	0.0543861	0.0140957
	ENSMUSG00000033721	vav 3 oncogene [Source:MGI Symbol;Acc:MGI:1888518]	Vav3	21.1961	25.332	20.4948	18.2814	20.7889	17.1914		-0.311096	0.0544298	0.0141397
	ENSMUSG00000022664	solute carrier family 35, member A5 [Source:MGI Symbol;Acc:MGI:1921352]	Slc35a5	9.22425	8.14799	7.20394	6.28518	7.69475	6.99665		-0.247043	0.0544298	0.0141427
	ENSMUSG00000036398	protein phosphatase 1, regulatory inhibitor subunit 11 [Source:MGI Symbol;Acc:MGI:1923747]	Ppp1r11	76.2985	84.0939	84.9886	65.5528	77.3974	66.5716		-0.218843	0.0544298	0.0141297
	ENSMUSG00000026767	MINDY lysine 48 deubiquitinase 3 [Source:MGI Symbol;Acc:MGI:1914210]	Mindy3	20.7224	21.7809	20.8929	17.0709	17.9095	18.4023		-0.198881	0.0544298	0.0141395
	ENSMUSG00000043460	leucine rich repeat and fibronectin type III, extracellular 2 [Source:MGI Symbol;Acc:MGI:3608416]	Elfn2	0.186623	0.0935742	0.237838	0.233091	0.246747	0.310394		0.913285	0.0544298	0.0141148
	ENSMUSG00000033773	RNA polymerase II associated protein 2 [Source:MGI Symbol;Acc:MGI:2141142]	Rpap2	30.0423	31.4201	27.9639	27.403	27.4832	25.5952		-0.186519	0.0544905	0.0141937
	ENSMUSG00000020538	sterol regulatory element binding transcription factor 1 [Source:MGI Symbol;Acc:MGI:107606]	Srebf1	107.627	96.7907	108.429	97.3077	117.876	117.908		0.180263	0.0544905	0.0141693
	ENSMUSG00000038069	CDKN2A interacting protein [Source:MGI Symbol;Acc:MGI:1918175]	Cdkn2aip	25.9674	29.9451	25.0755	35.6863	28.7532	30.2701		0.191153	0.0544905	0.0142014
	ENSMUSG00000038520	TBC1 domain family, member 17 [Source:MGI Symbol;Acc:MGI:2449973]	Tbc1d17	9.6505	9.89622	7.99741	12.3508	9.93256	10.6818		0.207712	0.0544905	0.014199
	ENSMUSG00000022661	CD200 antigen [Source:MGI Symbol;Acc:MGI:1196990]	Cd200	0.771441	1.14284	0.947868	4.32042	1.61781	1.51636		0.928963	0.0544905	0.0141848
	ENSMUSG00000071102	predicted pseudogene 10313 [Source:MGI Symbol;Acc:MGI:3642852]	Gm10313	0.46488	0.454535	0.405366	0.666022	0.630826	1.31107		1.14253	0.0544905	0.0141914
	ENSMUSG00000042594	SH2B adaptor protein 3 [Source:MGI Symbol;Acc:MGI:893598]	Sh2b3	38.3249	37.5195	36.5661	42.3662	39.5794	41.107		0.141868	0.0545091	0.0142134
	ENSMUSG00000085823	predicted gene 13012 [Source:MGI Symbol;Acc:MGI:3652270]	Gm13012	19.5662	20.4062	17.6496	12.115	15.6252	13.9539		-0.459037	0.0546735	0.0142634
	ENSMUSG00000032109	NLR family member X1 [Source:MGI Symbol;Acc:MGI:2429611]	Nlrx1	3.13916	2.50825	2.3311	1.52814	2.03367	2.07526		-0.444611	0.0546755	0.0142711
	ENSMUSG00000117905	predicted gene, 50230 [Source:MGI Symbol;Acc:MGI:6303033]	Gm50230	0.439562	0.491178	0.684445	0.839666	0.59647	0.94451		0.797544	0.0547198	0.0142898
	ENSMUSG00000004221	inhibitor of kappaB kinase gamma [Source:MGI Symbol;Acc:MGI:1338074]	Ikbkg	31.8198	32.9088	27.9215	28.8967	29.0194	27.9423		-0.139021	0.0547384	0.0143018
	ENSMUSG00000035234	BRCA1 A complex subunit [Source:MGI Symbol;Acc:MGI:1917931]	Abraxas1	19.1058	18	18.481	14.6651	17.6688	15.3795		-0.225654	0.0547959	0.0143338
	ENSMUSG00000040274	cyclin-dependent kinase 6 [Source:MGI Symbol;Acc:MGI:1277162]	Cdk6	97.1312	98.6704	97.1816	140.111	117.811	102.064		0.177309	0.0547959	0.0143341
	ENSMUSG00000050357	capping protein regulator and myosin 1 linker 2 [Source:MGI Symbol;Acc:MGI:2685431]	Carmil2	95.2292	93.4628	84.6294	119.395	87.4924	108.397		0.211136	0.0547959	0.0143384
	ENSMUSG00000020647	nuclear receptor coactivator 1 [Source:MGI Symbol;Acc:MGI:1276523]	Ncoa1	17.7883	15.8081	17.0148	22.2555	17.2099	18.9564		0.1939	0.0549176	0.0143775
[truncated: 11,950 more rows]

## Sheet: B. DE RNA annotated
Day 6, IL15 expanded CD8 T cells, RNAseq					mRNA expression - Transcript Per Million (TPM)								DE analysis
					WT			Pim dKO					Pim dKO / WT
gene_biotype (ensembl)	ave TPM above 10 (1 = TRUE, 0 = FALSE)	ensembl_gene_id	description	mgi_symbol	BR1	BR2	BR3	BR1	BR2	BR3	average TPM		Fold-change (log2)	q-value	p-value (unadjusted)
protein_coding	1	ENSMUSG00000031155	proviral integration site 2 [Source:MGI Symbol;Acc:MGI:97587]	Pim2	151.742	148.773	141.508	5.29267	5.31451	4.50432	76.1892		-4.94814	5.5824e-15	7.31837e-19
lncRNA	0	ENSMUSG00000117786	predicted gene 10503 [Source:MGI Symbol;Acc:MGI:3642784]	Gm10503	0	0	0	5.90211	2.33582	2.26367	1.75027		7.36658	9.8604e-06	2.58534e-09
protein_coding	1	ENSMUSG00000033826	dynein, axonemal, heavy chain 8 [Source:MGI Symbol;Acc:MGI:107714]	Dnah8	6.64327	6.35109	6.38343	33.2557	18.6971	17.2906	14.7702		1.57387	2.56463e-05	1.00865e-08
protein_coding	1	ENSMUSG00000024026	glyoxalase 1 [Source:MGI Symbol;Acc:MGI:95742]	Glo1	7.52548	8.15467	7.41799	20.837	14.26	13.4796	11.9458		0.915558	0.000125548	8.22951e-08
lncRNA	0	ENSMUSG00000097125	predicted gene, 26885 [Source:MGI Symbol;Acc:MGI:5477379]	Gm26885	0.0351927	0.0688191	0.0767182	2.06721	1.16204	1.00906	0.736506		4.23412	0.00013726	1.07966e-07
protein_coding	1	ENSMUSG00000078249	high mobility group AT-hook 1B [Source:MGI Symbol;Acc:MGI:96161]	Hmga1b	0.859428	0.746937	1.12411	42.7528	21.0566	22.4201	14.8267		4.7761	0.000151352	1.38892e-07
processed_pseudogene	1	ENSMUSG00000075391	glyoxalase 1, pseudogene [Source:MGI Symbol;Acc:MGI:3649615]	Glo1-ps	2.72772	3.00894	2.01259	36.6744	16.1344	19.9224	13.4134		2.91543	0.000152206	1.5963e-07
protein_coding	1	ENSMUSG00000078763	schlafen 1 [Source:MGI Symbol;Acc:MGI:1313259]	Slfn1	435.01	436.875	357.638	250.497	311.862	272.982	344.144		-0.592452	0.000168293	1.98564e-07
protein_coding	1	ENSMUSG00000040276	protein kinase C and casein kinase substrate in neurons 1 [Source:MGI Symbol;Acc:MGI:1345181]	Pacsin1	7.42441	5.0954	5.46238	19.1768	11.5116	15.771	10.7403		1.33663	0.000168496	2.20893e-07
protein_coding	1	ENSMUSG00000043263	interferon activated gene 209 [Source:MGI Symbol;Acc:MGI:2138243]	Ifi209	256.018	277.307	198.88	118.313	175.887	153.517	196.654		-0.721995	0.000423778	8.3334e-07
protein_coding	1	ENSMUSG00000024675	membrane-spanning 4-domains, subfamily A, member 4C [Source:MGI Symbol;Acc:MGI:1927656]	Ms4a4c	48.6161	46.2121	46.8576	18.9293	37.0613	22.5701	36.7078		-0.956047	0.000423778	7.59281e-07
protein_coding	1	ENSMUSG00000073491	interferon activated gene 213 [Source:MGI Symbol;Acc:MGI:3695276]	Ifi213	18.9491	18.5995	14.6972	9.15498	11.9672	11.8597	14.2046		-0.62844	0.000555913	1.31181e-06
protein_coding	1	ENSMUSG00000079339	interferon induced protein with tetratricpeptide repeats 1B like 1 [Source:MGI Symbol;Acc:MGI:3650685]	Ifit1bl1	45.5505	53.6726	41.5612	12.8451	24.2393	24.8498	33.7864		-1.04485	0.000555913	1.29239e-06
NA	1	ENSMUSG00000076258	NA	NA	2302.49	1803.13	3311.77	8864.89	4250.88	9088.31	4936.91		1.85781	0.000746718	2.83636e-06
protein_coding	1	ENSMUSG00000046229	SCAN domain-containing 1 [Source:MGI Symbol;Acc:MGI:1343132]	Scand1	12.4719	8.12956	24.7854	36.8444	30.8303	36.8096	24.9785		1.58649	0.000746718	3.03467e-06
NA	1	ENSMUSG00000095742			126.996	117.453	305.05	373.499	394.079	396.902	285.663		1.47711	0.000746718	2.77696e-06
NA	1	ENSMUSG00000063897	NA	NA	34.2444	32.2074	39.0195	52.5673	44.1657	52.3946	42.4332		0.593888	0.000746718	2.54764e-06
protein_coding	1	ENSMUSG00000070501	interferon activated gene 214 [Source:MGI Symbol;Acc:MGI:3584522]	Ifi214	25.2814	28.1832	20.7673	10.4819	17.166	15.0566	19.4894		-0.773867	0.000746718	3.01817e-06
protein_coding	1	ENSMUSG00000019261	microtubule-associated protein 1S [Source:MGI Symbol;Acc:MGI:2443304]	Map1s	15.3115	13.6315	18.1589	25.8405	20.3869	23.4127	19.457		0.640599	0.00078061	3.27474e-06
processed_pseudogene	1	ENSMUSG00000095762	predicted gene 16378 [Source:MGI Symbol;Acc:MGI:3646886]	Gm16378	18.3872	16.4244	44.5369	55.9381	59.4507	62.7398	42.9129		1.58949	0.000807365	3.81035e-06
protein_coding	1	ENSMUSG00000017493	insulin-like growth factor binding protein 4 [Source:MGI Symbol;Acc:MGI:96439]	Igfbp4	14.4775	14.1983	14.1417	76.5936	34.615	34.9297	31.4926		1.44771	0.000807365	3.76215e-06
protein_coding	1	ENSMUSG00000049103	chemokine (C-C motif) receptor 2 [Source:MGI Symbol;Acc:MGI:106185]	Ccr2	172.543	149.142	132.759	34.5359	117.285	66.2839	112.091		-1.19143	0.00108438	5.83931e-06
protein_coding	1	ENSMUSG00000034168	interferon regulatory factor 2 binding protein-like [Source:MGI Symbol;Acc:MGI:2442463]	Irf2bpl	51.7188	43.2328	61.1297	81.2887	64.9877	81.4514	63.9682		0.682541	0.00112841	6.36102e-06
protein_coding	0	ENSMUSG00000045045	leucine rich repeat and fibronectin type III domain containing 4 [Source:MGI Symbol;Acc:MGI:2385612]	Lrfn4	2.21419	2.07471	3.1676	4.85745	4.66335	4.6834	3.61012		1.0469	0.00139879	9.40648e-06
protein_coding	1	ENSMUSG00000068758	interleukin 3 receptor, alpha chain [Source:MGI Symbol;Acc:MGI:96553]	Il3ra	13.7765	12.8431	18.8577	22.9424	20.5938	22.0646	18.513		0.649976	0.00139879	9.53565e-06
protein_coding	0	ENSMUSG00000049295	zinc finger protein 219 [Source:MGI Symbol;Acc:MGI:1917140]	Zfp219	6.39085	5.40876	6.60633	12.0849	8.55559	9.71438	8.12681		0.711186	0.00141561	1.01423e-05
protein_coding	0	ENSMUSG00000034686	proline rich 7 (synaptic) [Source:MGI Symbol;Acc:MGI:3487246]	Prr7	2.5707	2.01079	4.93151	9.9031	7.20924	8.4583	5.84727		1.68009	0.00151406	1.20426e-05
protein_coding	1	ENSMUSG00000024679	membrane-spanning 4-domains, subfamily A, member 6D [Source:MGI Symbol;Acc:MGI:1916024]	Ms4a6d	19.1291	18.2878	14.5147	7.2441	11.6581	10.4111	13.5408		-0.800816	0.00151406	1.21171e-05
protein_coding	1	ENSMUSG00000090958	leucine rich repeat containing 32 [Source:MGI Symbol;Acc:MGI:93882]	Lrrc32	9.51393	10.5571	10.7652	20.9972	15.528	15.2956	13.7762		0.682206	0.00154319	1.35546e-05
protein_coding	1	ENSMUSG00000054072	interferon inducible GTPase 1 [Source:MGI Symbol;Acc:MGI:1926259]	Iigp1	85.9545	84.4459	61.5927	37.3045	64.913	46.3241	63.4224		-0.741238	0.00154319	1.32434e-05
protein_coding	1	ENSMUSG00000033467	cytokine receptor-like factor 2 [Source:MGI Symbol;Acc:MGI:1889506]	Crlf2	44.6336	35.8466	58.753	81.9871	69.6917	75.0578	60.995		0.817511	0.00172691	1.86269e-05
protein_coding	1	ENSMUSG00000020308	tubulin polyglutamylase complex subunit 1 [Source:MGI Symbol;Acc:MGI:106618]	Tpgs1	16.2801	15.0515	21.8009	26.1801	27.8774	29.594	22.7973		0.813965	0.00172691	1.87437e-05
protein_coding	0	ENSMUSG00000038034	immunoglobulin superfamily, member 8 [Source:MGI Symbol;Acc:MGI:2154090]	Igsf8	7.25457	7.24591	8.71992	12.664	9.18791	12.4436	9.58599		0.681844	0.00172691	1.6766e-05
protein_coding	0	ENSMUSG00000022901	CD86 antigen [Source:MGI Symbol;Acc:MGI:101773]	Cd86	14.2822	14.9285	11.9545	1.9444	6.21556	6.87767	9.36715		-1.26513	0.00172691	1.87906e-05
protein_coding	1	ENSMUSG00000028270	guanylate binding protein 2 [Source:MGI Symbol;Acc:MGI:102772]	Gbp2	371.111	416.767	288.771	194.822	303.901	243.098	303.078		-0.588005	0.00187347	2.19234e-05
protein_coding	1	ENSMUSG00000055148	Kruppel-like factor 2 (lung) [Source:MGI Symbol;Acc:MGI:1342772]	Klf2	141.735	120.745	149.65	294.173	169.23	214.444	181.663		0.696543	0.00189334	2.25872e-05
protein_coding	0	ENSMUSG00000021136	SPARC related modular calcium binding 1 [Source:MGI Symbol;Acc:MGI:1929878]	Smoc1	1.76544	1.56331	1.97512	0.254521	0.753346	0.375771	1.11458		-2.02933	0.00189786	2.28899e-05
protein_coding	0	ENSMUSG00000048264	disco interacting protein 2 homolog C [Source:MGI Symbol;Acc:MGI:1920179]	Dip2c	4.03023	4.12951	4.27879	10.535	6.71617	6.46079	6.02509		0.772301	0.00203559	2.66215e-05
protein_coding	1	ENSMUSG00000079227	chemokine (C-C motif) receptor 5 [Source:MGI Symbol;Acc:MGI:107182]	Ccr5	188.127	158.439	146.633	69.1303	147.63	96.5723	134.422		-0.739032	0.00218934	3.15718e-05
NA	1	ENSMUSG00000106106	NA	NA	2073.16	1148.34	1526.46	13126	2963.25	15474	6051.87		2.90935	0.0022627	3.4524e-05
protein_coding	1	ENSMUSG00000055633	zinc finger protein 580 [Source:MGI Symbol;Acc:MGI:1916242]	Zfp580	13.0523	11.3439	14.6908	24.4909	18.9258	21.2335	17.2895		0.762346	0.0022627	3.41026e-05
protein_coding	0	ENSMUSG00000095098	coiled-coil domain containing 85B [Source:MGI Symbol;Acc:MGI:2147607]	Ccdc85b	5.73001	5.44151	7.58082	9.6718	9.29475	8.93907	7.77633		0.644206	0.00226509	3.57618e-05
processed_pseudogene	1	ENSMUSG00000081051	predicted pseudogene 15427 [Source:MGI Symbol;Acc:MGI:3642341]	Gm15427	111.408	123.51	117.034	195.849	133.917	180.808	143.755		0.592779	0.00229584	3.73764e-05
protein_coding	0	ENSMUSG00000062082	CD200 receptor 4 [Source:MGI Symbol;Acc:MGI:3036289]	Cd200r4	10.7057	15.8867	10.8744	5.05819	7.72723	6.26334	9.41926		-0.946011	0.00229584	3.77452e-05
protein_coding	0	ENSMUSG00000024084	glutaminyl-peptide cyclotransferase (glutaminyl cyclase) [Source:MGI Symbol;Acc:MGI:1917786]	Qpct	10.228	9.32773	7.7188	3.41694	7.05362	4.91536	7.11008		-0.891263	0.00231061	3.90759e-05
protein_coding	0	ENSMUSG00000005533	insulin-like growth factor I receptor [Source:MGI Symbol;Acc:MGI:96433]	Igf1r	0.672735	0.714274	0.707562	2.15947	1.19207	1.27137	1.11958		0.971937	0.00235729	4.16745e-05
protein_coding	1	ENSMUSG00000052837	jun B proto-oncogene [Source:MGI Symbol;Acc:MGI:96647]	Junb	54.0098	53.794	73.5901	113.808	89.3332	92.8325	79.5613		0.758747	0.00235729	4.20285e-05
protein_coding	0	ENSMUSG00000052374	actinin alpha 2 [Source:MGI Symbol;Acc:MGI:109192]	Actn2	9.05231	10.7611	8.9102	3.86872	5.44089	6.20212	7.37255		-0.728275	0.00235729	4.07997e-05
protein_coding	1	ENSMUSG00000086564	CD101 antigen [Source:MGI Symbol;Acc:MGI:2685862]	Cd101	18.1848	16.458	13.2648	6.54662	12.0533	10.0598	12.7612		-0.734999	0.00235729	4.10861e-05
protein_coding	1	ENSMUSG00000020644	inhibitor of DNA binding 2 [Source:MGI Symbol;Acc:MGI:96397]	Id2	463.47	425.119	395.389	198.819	391.187	263.314	356.216		-0.660667	0.00244749	4.52125e-05
protein_coding	1	ENSMUSG00000112023	leukocyte immunoglobulin-like receptor, subfamily B, member 4B [Source:MGI Symbol;Acc:MGI:102702]	Lilr4b	28.8401	32.4341	25.8575	12.1267	19.582	19.5843	23.0708		-0.662591	0.00254201	4.89028e-05
protein_coding	1	ENSMUSG00000049422	coiled-coil-helix-coiled-coil-helix domain containing 10 [Source:MGI Symbol;Acc:MGI:2143558]	Chchd10	22.9208	19.4709	26.7561	33.2618	31.8385	36.9781	28.5377		0.70125	0.00263838	5.15366e-05
protein_coding	0	ENSMUSG00000024424	tetratricopeptide repeat domain 39C [Source:MGI Symbol;Acc:MGI:1919997]	Ttc39c	12.9588	11.6894	10.219	5.5659	9.18918	7.8542	9.57941		-0.61128	0.00277247	5.57499e-05
protein_coding	1	ENSMUSG00000029725	protein phosphatase 1, regulatory subunit 35 [Source:MGI Symbol;Acc:MGI:1922853]	Ppp1r35	18.0314	18.0499	25.0819	31.3687	30.9733	31.5811	25.8477		0.740412	0.00283614	5.76305e-05
protein_coding	1	ENSMUSG00000046999	RIKEN cDNA 1110032F04 gene [Source:MGI Symbol;Acc:MGI:1915975]	1110032F04Rik	17.7525	18.0199	18.9066	43.101	22.3119	28.8761	24.828		0.707603	0.00284374	5.82933e-05
protein_coding	1	ENSMUSG00000030034	INO80 complex subunit B [Source:MGI Symbol;Acc:MGI:1917270]	Ino80b	22.5015	21.6198	28.6031	32.8653	30.4676	36.8807	28.823		0.626723	0.00284374	5.89033e-05
protein_coding	1	ENSMUSG00000060032	H2J.A histone [Source:MGI Symbol;Acc:MGI:3606192]	H2aj	50.626	40.4619	71.3194	81.9462	69.8484	81.6724	65.9791		0.711159	0.00288524	6.24106e-05
protein_coding	1	ENSMUSG00000071076	jun D proto-oncogene [Source:MGI Symbol;Acc:MGI:96648]	Jund	168.465	132.155	213.681	236.521	276.128	254.981	213.655		0.709452	0.00288524	6.22331e-05
protein_coding	0	ENSMUSG00000034459	interferon-induced protein with tetratricopeptide repeats 1 [Source:MGI Symbol;Acc:MGI:99450]	Ifit1	3.77068	4.22978	3.28795	0.795666	2.02287	1.36019	2.57786		-1.46051	0.00303722	6.80871e-05
NA	1	ENSMUSG00000074876	NA	NA	15.1861	14.2264	18.632	22.8137	20.7796	23.8893	19.2545		0.61415	0.00329619	7.8646e-05
protein_coding	0	ENSMUSG00000064288	H4 clustered histone 12 [Source:MGI Symbol;Acc:MGI:2448439]	H4c12	0.746491	0	1.95277	4.9909	3.37654	8.07024	3.18949		3.51321	0.00346097	8.7724e-05
NA	1	ENSMUSG00000088609	NA	NA	2165.61	1920.32	2866.4	4650.02	3472.79	4934.04	3334.86		1.11096	0.00346097	9.48281e-05
protein_coding	0	ENSMUSG00000046792	zinc finger protein 787 [Source:MGI Symbol;Acc:MGI:1914359]	Zfp787	5.84081	4.35111	5.59678	8.70515	7.58706	8.64855	6.78825		0.719306	0.00346097	9.46359e-05
protein_coding	1	ENSMUSG00000066278	vacuolar protein sorting 37B [Source:MGI Symbol;Acc:MGI:1916724]	Vps37b	175.284	228.512	208.149	387.954	224.332	312.998	256.205		0.622213	0.00346097	9.36991e-05
protein_coding	1	ENSMUSG00000002274	meteorin, glial cell differentiation regulator [Source:MGI Symbol;Acc:MGI:1917333]	Metrn	23.0064	17.2306	24.7734	26.4865	29.836	32.1079	25.5735		0.585199	0.00346097	9.38853e-05
protein_coding	0	ENSMUSG00000038578	sushi domain containing 1 [Source:MGI Symbol;Acc:MGI:3651543]	Susd1	4.25152	3.82245	4.04813	2.07702	3.09457	2.45778	3.29191		-0.67216	0.00346097	8.71817e-05
protein_coding	1	ENSMUSG00000039899	fibrinogen-like protein 2 [Source:MGI Symbol;Acc:MGI:103266]	Fgl2	258.483	261.588	218.341	72.4964	217.704	141.901	195.086		-0.829669	0.00346097	9.3196e-05
protein_coding	1	ENSMUSG00000049086	brain expressed myelocytomatosis oncogene [Source:MGI Symbol;Acc:MGI:88184]	Bmyc	12.3205	10.3475	19.6271	29.9846	25.0777	21.7167	19.8457		0.907196	0.00347071	9.60049e-05
lncRNA	0	ENSMUSG00000095562	erythroid differentiation regulator 1 [Source:NCBI gene (formerly Entrezgene);Acc:170942]		0.738443	0.385073	0.772689	1.4106	1.67007	2.42968	1.23443		1.8085	0.00348325	9.72652e-05
protein_coding	0	ENSMUSG00000000386	MX dynamin-like GTPase 1 [Source:MGI Symbol;Acc:MGI:97243]	Mx1	11.0453	11.5917	9.73859	3.79078	7.04175	5.49542	8.11725		-0.983694	0.00351903	9.9187e-05
protein_coding	0	ENSMUSG00000035342	leucine zipper, putative tumor suppressor 2 [Source:MGI Symbol;Acc:MGI:2385095]	Lzts2	2.96941	3.49241	4.13719	8.90916	4.67175	6.31117	5.08185		0.926036	0.00370908	0.000108978
protein_coding	1	ENSMUSG00000033355	receptor transporter protein 4 [Source:MGI Symbol;Acc:MGI:1915025]	Rtp4	20.4379	24.9344	19.7751	10.5432	15.424	14.5898	17.6174		-0.60557	0.00370908	0.000107899
protein_coding	1	ENSMUSG00000002083	BCL2 binding component 3 [Source:MGI Symbol;Acc:MGI:2181667]	Bbc3	25.0559	19.5129	35.8082	59.9069	34.1736	42.6765	36.189		0.839468	0.00385579	0.000114745
unprocessed_pseudogene	0	ENSMUSG00000098934	GTPase, very large interferon inducible, pseudogene 4 [Source:MGI Symbol;Acc:MGI:5011038]	Gvin-ps4	3.40031	3.16633	2.17433	0.896982	2.02141	1.27862	2.15633		-1.18346	0.00416576	0.000127792
lncRNA	1	ENSMUSG00000110631	predicted gene, 42047 [Source:MGI Symbol;Acc:MGI:5624932]	Gm42047	108.657	98.7993	100.357	27.0235	56.8808	52.1298	73.9747		-1.06108	0.00419106	0.000129117
protein_coding	1	ENSMUSG00000000303	cadherin 1 [Source:MGI Symbol;Acc:MGI:88354]	Cdh1	84.7043	69.6676	55.2122	34.8219	54.0559	47.5331	57.6658		-0.627305	0.00427599	0.000133976
protein_coding	0	ENSMUSG00000030789	integrin alpha X [Source:MGI Symbol;Acc:MGI:96609]	Itgax	6.83731	7.87048	7.48421	1.55156	4.38676	4.17111	5.38357		-0.952352	0.00428058	0.000134681
protein_coding	1	ENSMUSG00000037907	ankyrin repeat domain 13b [Source:MGI Symbol;Acc:MGI:2144501]	Ankrd13b	8.52388	8.97681	10.0777	18.3976	10.9766	13.4598	11.7354		0.617023	0.00435066	0.000137456
protein_coding	0	ENSMUSG00000034573	protein tyrosine phosphatase, non-receptor type 13 [Source:MGI Symbol;Acc:MGI:103293]	Ptpn13	8.70844	8.89413	6.54474	4.29205	6.83343	5.4095	6.78038		-0.591654	0.00436135	0.000141225
NA	1	ENSMUSG00000076281	NA	NA	259.464	295.639	354.514	692.722	404.758	772.084	463.197		1.26464	0.00450284	0.000155292
protein_coding	0	ENSMUSG00000063160	numb-like [Source:MGI Symbol;Acc:MGI:894702]	Numbl	1.87978	1.82045	1.82646	3.01373	2.12566	3.05463	2.28679		0.649889	0.0045338	0.000158042
protein_coding	0	ENSMUSG00000032860	purinergic receptor P2Y, G-protein coupled 2 [Source:MGI Symbol;Acc:MGI:105107]	P2ry2	0	0	0	0.0566467	0.107306	0.0836322	0.0412642		2.6037	0.00456788	0.000160595
protein_coding	0	ENSMUSG00000028358	zinc finger protein 618 [Source:MGI Symbol;Acc:MGI:1919950]	Zfp618	0.0996172	0.0324668	0.0760061	0	0.0337942	0	0.0403141		-3.09826	0.00456788	0.000160058
processed_pseudogene	0	ENSMUSG00000118495	predicted gene, 21011 [Source:MGI Symbol;Acc:MGI:5434366]	Gm21011	12.0037	11.0505	9.92127	5.5966	7.4109	7.48727	8.9117		-0.623408	0.00459078	0.000162496
processed_pseudogene	0	ENSMUSG00000111118	predicted gene 6545 [Source:MGI Symbol;Acc:MGI:3643874]	Gm6545	8.08517	8.50027	6.08356	3.23837	5.54463	4.29072	5.95712		-0.832034	0.00463419	0.000165855
lncRNA	0	ENSMUSG00000117446	predicted gene, 35551 [Source:MGI Symbol;Acc:MGI:5594710]	Gm35551	1.96452	2.84564	1.42752	0.312725	0.394931	0.307801	1.20886		-2.53491	0.00471754	0.000170075
processed_pseudogene	1	ENSMUSG00000057657	ribosomal protein S18, pseudogene 3 [Source:MGI Symbol;Acc:MGI:3642474]	Rps18-ps3	48.2665	65.5867	78.8304	100.737	70.0009	116.197	79.9364		0.853356	0.00474427	0.000171661
protein_coding	0	ENSMUSG00000028005	guanylate cyclase 1, soluble, beta 1 [Source:MGI Symbol;Acc:MGI:1860604]	Gucy1b1	0.237235	0.270615	0.387869	2.80401	0.697491	1.1151	0.918719		2.04904	0.00508359	0.000193147
processed_pseudogene	1	ENSMUSG00000082978	ribosomal protein SA, pseudogene 11 [Source:MGI Symbol;Acc:MGI:3649246]	Rpsa-ps11	12.9683	16.7355	16.3339	24.8975	20.1453	22.9047	18.9975		0.631943	0.00511962	0.000195309
protein_coding	0	ENSMUSG00000020707	ring finger protein 135 [Source:MGI Symbol;Acc:MGI:1919206]	Rnf135	5.93146	6.73944	6.64308	3.53428	4.13515	3.68326	5.11111		-0.735907	0.00513878	0.000197388
protein_coding	0	ENSMUSG00000074896	interferon-induced protein with tetratricopeptide repeats 3 [Source:MGI Symbol;Acc:MGI:1101055]	Ifit3	8.87575	11.484	7.79766	4.39804	6.88233	5.33257	7.46172		-0.784813	0.00554528	0.000223907
protein_coding	0	ENSMUSG00000048852	predicted gene 12185 [Source:MGI Symbol;Acc:MGI:3652173]	Gm12185	9.69222	9.37464	7.52449	3.54362	7.52351	5.64322	7.21695		-0.690996	0.00559377	0.000227331
protein_coding	1	ENSMUSG00000039911	splA/ryanodine receptor domain and SOCS box containing 1 [Source:MGI Symbol;Acc:MGI:1921896]	Spsb1	11.5499	11.5691	14.1136	17.9894	13.7556	20.9685	14.991		0.69817	0.00569034	0.000236974
lncRNA	0	ENSMUSG00000087387	predicted gene 15420 [Source:MGI Symbol;Acc:MGI:3705302]	Gm15420	1.50068	0.391275	0.523424	8.0266	2.44364	7.05377	3.32323		2.69912	0.00569414	0.000238129
protein_coding	1	ENSMUSG00000020131	proprotein convertase subtilisin/kexin type 4 [Source:MGI Symbol;Acc:MGI:97514]	Pcsk4	7.87373	7.33926	10.127	16.4319	10.6844	12.5833	10.8399		0.678766	0.00593221	0.000256316
processed_pseudogene	1	ENSMUSG00000111966	predicted gene 5781 [Source:MGI Symbol;Acc:MGI:3646721]	Gm5781	30.4932	42.4945	39.1965	61.5131	42.5672	80.5614	49.471		0.975476	0.00598773	0.000261396
protein_coding	0	ENSMUSG00000033066	growth arrest specific 7 [Source:MGI Symbol;Acc:MGI:1202388]	Gas7	3.70639	4.57211	3.27534	1.04679	2.68598	2.05124	2.88964		-0.965087	0.00635433	0.000287704
protein_coding	1	ENSMUSG00000051498	toll-like receptor 6 [Source:MGI Symbol;Acc:MGI:1341296]	Tlr6	21.1221	20.8557	17.0557	7.69955	16.14	13.9817	16.1425		-0.587174	0.00663377	0.000319168
protein_coding	0	ENSMUSG00000040009	guanine nucleotide binding protein, alpha z subunit [Source:MGI Symbol;Acc:MGI:95780]	Gnaz	0	0	0	0.153967	0.116664	0.0606171	0.0552081		2.40641	0.0066346	0.000320078
protein_coding	1	ENSMUSG00000066363	serine (or cysteine) peptidase inhibitor, clade A, member 3F [Source:MGI Symbol;Acc:MGI:2182838]	Serpina3f	25.884	24.1976	22.925	8.93691	24.2438	13.6246	19.9687		-0.770292	0.00679166	0.000332107
protein_coding	0	ENSMUSG00000051550	zinc finger protein 579 [Source:MGI Symbol;Acc:MGI:1915740]	Zfp579	5.12402	4.85486	4.61454	7.8893	5.52196	8.08095	6.01427		0.63094	0.00694012	0.000346645
protein_coding	0	ENSMUSG00000068606	predicted gene 4841 [Source:MGI Symbol;Acc:MGI:3643814]	Gm4841	9.22924	8.76986	7.08198	5.56325	6.71644	5.09005	7.07514		-0.658072	0.00696579	0.00034884
transcribed_unprocessed_pseudogene	1	ENSMUSG00000102051	lymphocyte antigen 6 complex, locus A2 [Source:MGI Symbol;Acc:MGI:3612406]	Ly6a2	27.4349	35.1952	32.5756	8.36284	26.0069	15.9136	24.2482		-0.927683	0.00726821	0.000370655
protein_coding	1	ENSMUSG00000007872	inhibitor of DNA binding 3 [Source:MGI Symbol;Acc:MGI:96398]	Id3	24.773	24.7515	26.4775	55.8302	27.8222	39.2421	33.1494		0.646638	0.00745087	0.000383877
protein_coding	1	ENSMUSG00000062619	RIKEN cDNA 2310039H08 gene [Source:MGI Symbol;Acc:MGI:1914351]	2310039H08Rik	28.1198	22.9117	39.445	38.5349	43.9641	41.3762	35.7253		0.603475	0.00745104	0.000384863
protein_coding	0	ENSMUSG00000027765	purinergic receptor P2Y, G-protein coupled 1 [Source:MGI Symbol;Acc:MGI:105049]	P2ry1	3.71801	2.97191	4.23594	5.7544	5.13114	6.35264	4.694		0.805056	0.00799152	0.000434781
protein_coding	0	ENSMUSG00000049539	H1.1 linker histone, cluster member [Source:MGI Symbol;Acc:MGI:1931523]	H1f1	0.471468	1.02439	1.09629	3.75255	1.4217	6.20504	2.32857		2.51514	0.00808608	0.000444581
protein_coding	0	ENSMUSG00000037613	tumor necrosis factor receptor superfamily, member 23 [Source:MGI Symbol;Acc:MGI:1930269]	Tnfrsf23	9.84644	8.19999	5.45909	3.31263	6.24855	4.91834	6.33084		-0.749858	0.00808608	0.000447492
NA	1	ENSMUSG00000076137	NA	NA	17.9972	22.0822	27.6939	56.624	34.4775	84.594	40.5781		1.71413	0.00821296	0.000460615
protein_coding	1	ENSMUSG00000050212	eva-1 homolog B (C. elegans) [Source:MGI Symbol;Acc:MGI:1922063]	Eva1b	8.27521	6.80118	13.9087	14.6621	11.7174	14.3185	11.6138		0.739158	0.00821296	0.000464056
protein_coding	0	ENSMUSG00000028042	zinc finger and BTB domain containing 7B [Source:MGI Symbol;Acc:MGI:102755]	Zbtb7b	6.97757	6.84267	5.48495	3.58087	6.01073	4.03358	5.48839		-0.620523	0.00822865	0.000468178
protein_coding	1	ENSMUSG00000020601	tribbles pseudokinase 2 [Source:MGI Symbol;Acc:MGI:2145021]	Trib2	17.2463	17.8956	17.3808	37.2805	20.8995	26.6679	22.8951		0.628614	0.00823453	0.000473239
protein_coding	0	ENSMUSG00000079019	insulin-like 3 [Source:MGI Symbol;Acc:MGI:108427]	Insl3	2.24307	2.43684	3.42284	5.53451	5.41113	5.62309	4.11191		1.15283	0.00838596	0.000495397
protein_coding	1	ENSMUSG00000025473	a disintegrin and metallopeptidase domain 8 [Source:MGI Symbol;Acc:MGI:107825]	Adam8	49.3379	50.4413	41.3139	10.9835	42.2936	25.9878	36.7263		-0.909143	0.00838596	0.000496917
protein_coding	0	ENSMUSG00000040258	neurexophilin 4 [Source:MGI Symbol;Acc:MGI:1336197]	Nxph4	0.625715	0.271907	0.424364	0.863244	0.88052	2.0261	0.848641		1.79566	0.00841335	0.000499643
protein_coding	1	ENSMUSG00000075602	lymphocyte antigen 6 complex, locus A [Source:MGI Symbol;Acc:MGI:107527]	Ly6a	570.762	601.716	460.53	101.626	466.503	295.99	416.188		-0.991007	0.00850583	0.000507455
protein_coding	1	ENSMUSG00000042419	nuclear factor of kappa light polypeptide gene enhancer in B cells inhibitor like 1 [Source:MGI Symbol;Acc:MGI:1340031]	Nfkbil1	19.6755	16.6075	22.5072	28.8575	23.833	29.0302	23.4185		0.586919	0.00888596	0.000542501
protein_coding	1	ENSMUSG00000109713	poliovirus receptor related immunoglobulin domain containing [Source:MGI Symbol;Acc:MGI:5596028]	Pvrig	29.5444	28.9573	29.429	10.0927	20.777	15.7116	22.4187		-0.886429	0.00891173	0.000549102
protein_coding	0	ENSMUSG00000028051	hyperpolarization-activated, cyclic nucleotide-gated K+ 3 [Source:MGI Symbol;Acc:MGI:1298211]	Hcn3	1.31759	1.24259	1.32003	4.41797	2.00349	2.55634	2.143		1.03671	0.00900353	0.000563134
lncRNA	0	ENSMUSG00000109501	predicted gene 14377 [Source:MGI Symbol;Acc:MGI:3651179]	Gm14377	0.834187	0.579999	0.775887	0.265582	0.452785	0.15684	0.51088		-1.69093	0.0090396	0.000574756
protein_coding	0	ENSMUSG00000024027	glucagon-like peptide 1 receptor [Source:MGI Symbol;Acc:MGI:99571]	Glp1r	0.0601201	0	0.0873724	0.172265	0.19942	0.22607	0.124208		2.62321	0.00935531	0.000604641
processed_pseudogene	1	ENSMUSG00000051723	ribosomal protein L31, pseudogene 13 [Source:MGI Symbol;Acc:MGI:3809036]	Rpl31-ps13	6.77766	10.0407	11.2827	15.0066	13.9349	17.6665	12.4515		0.966276	0.0095213	0.000621611
protein_coding	0	ENSMUSG00000050241	killer cell lectin-like receptor family E member 1 [Source:MGI Symbol;Acc:MGI:2662547]	Klre1	4.93273	7.51688	4.7953	1.94183	3.76889	3.19588	4.35859		-0.864771	0.00961604	0.00063536
protein_coding	1	ENSMUSG00000026919	lipocalin 4 [Source:MGI Symbol;Acc:MGI:102668]	Lcn4	72.9709	55.7047	61.3988	27.4472	43.1464	41.5834	50.3752		-0.671097	0.00976342	0.000651498
protein_coding	0	ENSMUSG00000026765	LY6/PLAUR domain containing 6B [Source:MGI Symbol;Acc:MGI:1919147]	Lypd6b	7.60251	9.0949	5.45937	4.31405	6.06843	4.37226	6.15192		-0.707398	0.0100585	0.000692288
protein_coding	0	ENSMUSG00000041734	kirre like nephrin family adhesion molecule 1 [Source:MGI Symbol;Acc:MGI:1891396]	Kirrel	0.0936239	0.0813693	0.0952445	2.65284	0.352901	0.396062	0.612008		2.38259	0.0100885	0.000698713
protein_coding	0	ENSMUSG00000051246	Myb/SANT-like DNA-binding domain containing 1 [Source:MGI Symbol;Acc:MGI:2684990]	Msantd1	0.440956	0.10452	0.734054	0.804041	0.725287	1.39434	0.700533		1.95023	0.0101891	0.000715336
protein_coding	0	ENSMUSG00000046269	ubiquitin specific peptidase 27, X chromosome [Source:MGI Symbol;Acc:MGI:1859645]	Usp27x	0.544298	0.851497	0.759386	2.31341	1.37871	1.40713	1.20907		1.13948	0.0104683	0.000754803
protein_coding	0	ENSMUSG00000038517	TBK1 binding protein 1 [Source:MGI Symbol;Acc:MGI:1920424]	Tbkbp1	2.87103	3.0172	2.29911	6.18387	3.94889	4.07603	3.73269		0.619972	0.0106314	0.000769346
processed_pseudogene	0	ENSMUSG00000062279	predicted gene 10237 [Source:MGI Symbol;Acc:MGI:3641816]	Gm10237	1.38634	1.80732	3.02215	6.28955	3.44889	6.51634	3.7451		1.64725	0.0106847	0.000777758
protein_coding	0	ENSMUSG00000051790	neuroligin 2 [Source:MGI Symbol;Acc:MGI:2681835]	Nlgn2	2.85847	2.49307	3.31752	7.94057	5.86379	4.46603	4.48991		0.870465	0.0106847	0.000779923
transcribed_processed_pseudogene	0	ENSMUSG00000081137	cDNA sequence BC022960 [Source:MGI Symbol;Acc:MGI:2670977]	BC022960	0.384967	0.418223	0.279736	0.245126	0	0.0603166	0.231395		-2.24067	0.0106847	0.00078441
protein_coding	1	ENSMUSG00000030167	killer cell lectin-like receptor subfamily C, member 1 [Source:MGI Symbol;Acc:MGI:1336161]	Klrc1	14.2631	21.4255	12.5395	6.89555	12.372	9.10449	12.7667		-0.779883	0.010727	0.000794232
processed_pseudogene	1	ENSMUSG00000067870	ribosomal protein L31, pseudogene 8 [Source:MGI Symbol;Acc:MGI:3647726]	Rpl31-ps8	100.433	136.151	131.363	166.839	127.922	205.048	144.626		0.669526	0.0107714	0.000805068
protein_coding	0	ENSMUSG00000033436	armadillo repeat containing, X-linked 2 [Source:MGI Symbol;Acc:MGI:1914666]	Armcx2	1.43895	2.27789	1.52361	3.92677	2.55699	2.89871	2.43715		0.795695	0.0107828	0.000808572
protein_coding	0	ENSMUSG00000069273	H3 clustered histone 6 [Source:MGI Symbol;Acc:MGI:2448326]	H3c6	0.696486	0.54479	1.09318	1.99568	1.38616	5.89277	1.93484		2.43953	0.0108276	0.000818363
protein_coding	0	ENSMUSG00000067220	cyclic nucleotide gated channel alpha 1 [Source:MGI Symbol;Acc:MGI:88436]	Cnga1	1.49086	0.983785	1.2037	0.685602	0.715973	0.640202	0.953353		-0.88087	0.0109244	0.00083065
protein_coding	0	ENSMUSG00000090812	sterile alpha motif domain containing 15 [Source:MGI Symbol;Acc:MGI:2685109]	Samd15	0.466183	0.425422	0.243901	0.0890518	0.168692	0.0876498	0.246817		-1.81277	0.0110434	0.000846418
protein_coding	0	ENSMUSG00000042284	integrin alpha 1 [Source:MGI Symbol;Acc:MGI:96599]	Itga1	4.27016	3.82006	2.94276	0.364792	2.40727	1.58335	2.56473		-1.41984	0.0111927	0.000869599
protein_coding	1	ENSMUSG00000058443	ribosomal protein L10, pseudogene 3 [Source:MGI Symbol;Acc:MGI:3704336]	Rpl10-ps3	18.6506	20.3606	17.9818	30.5581	21.6731	33.9257	23.8583		0.713405	0.0115128	0.000905579
protein_coding	0	ENSMUSG00000002985	apolipoprotein E [Source:MGI Symbol;Acc:MGI:88057]	Apoe	5.88254	4.82854	5.79438	10.9249	6.60272	9.01194	7.17417		0.697385	0.0115432	0.000914738
processed_pseudogene	1	ENSMUSG00000060019	predicted pseudogene 10073 [Source:MGI Symbol;Acc:MGI:3641908]	Gm10073	32.3479	48.3854	50.4752	63.4182	48.3615	75.8639	53.142		0.782333	0.0115704	0.00092625
protein_coding	0	ENSMUSG00000105096	guanylate-binding protein 10 [Source:MGI Symbol;Acc:MGI:4359647]	Gbp10	6.73518	7.68286	4.98151	2.92926	4.89611	4.01378	5.20645		-0.725914	0.0116498	0.000935559
lncRNA	0	ENSMUSG00000108435	predicted gene 45051 [Source:MGI Symbol;Acc:MGI:5753627]	Gm45051	1.45112	1.26118	2.31981	3.69597	2.62549	3.29674	2.44172		1.09324	0.0119251	0.000981781
processed_pseudogene	1	ENSMUSG00000058603	ribosomal protein L28, pseudogene 1 [Source:MGI Symbol;Acc:MGI:3705349]	Rpl28-ps1	70.3216	80.3079	77.2619	117.942	83.4641	126.927	92.7041		0.661185	0.011957	0.000989109
protein_coding	0	ENSMUSG00000020182	dopa decarboxylase [Source:MGI Symbol;Acc:MGI:94876]	Ddc	6.2912	5.64924	4.12004	2.21903	3.61314	3.65651	4.2582		-0.693322	0.011957	0.000988443
protein_coding	0	ENSMUSG00000004383	LARGE xylosyl- and glucuronyltransferase 1 [Source:MGI Symbol;Acc:MGI:1342270]	Large1	0.671617	0.628121	0.929379	1.72919	1.1359	1.15294	1.04119		0.818163	0.0120869	0.00100655
processed_pseudogene	0	ENSMUSG00000078238	predicted gene 12854 [Source:MGI Symbol;Acc:MGI:3650410]	Gm12854	4.70515	4.08929	4.7866	2.62148	1.41883	1.4744	3.18263		-1.39269	0.0121046	0.00101085
lncRNA	0	ENSMUSG00000113769	RIKEN cDNA 5033406O09 gene [Source:MGI Symbol;Acc:MGI:1923205]	5033406O09Rik	0.321514	0.670634	0.168212	0.122833	0.116342	0	0.233256		-3.09004	0.0122178	0.0010251
protein_coding	0	ENSMUSG00000036606	plexin B2 [Source:MGI Symbol;Acc:MGI:2154239]	Plxnb2	0.0905072	0.0786605	0.170994	0.316964	0.191045	0.311974	0.193358		1.5229	0.0122286	0.00102761
protein_coding	0	ENSMUSG00000066682	paired immunoglobin-like type 2 receptor beta 2 [Source:MGI Symbol;Acc:MGI:2450535]	Pilrb2	0.357034	0.543027	0.518877	0.11367	0.161494	0.11188	0.300997		-1.67213	0.0123355	0.00104468
protein_coding	0	ENSMUSG00000041075	frizzled class receptor 7 [Source:MGI Symbol;Acc:MGI:108570]	Fzd7	0.231261	0.133994	0.179248	0.441761	0.371926	0.458962	0.302859		1.23357	0.0123848	0.00105456
protein_coding	0	ENSMUSG00000053310	neurogranin [Source:MGI Symbol;Acc:MGI:1927184]	Nrgn	4.00731	2.40313	3.35452	7.27216	5.7278	6.0275	4.79874		0.933182	0.0123848	0.00105668
protein_coding	0	ENSMUSG00000019796	low density lipoprotein receptor-related protein 11 [Source:MGI Symbol;Acc:MGI:2442989]	Lrp11	3.81588	4.26396	3.4462	2.08263	2.95887	2.56231	3.18831		-0.585567	0.0126814	0.00109047
lncRNA	0	ENSMUSG00000097006	RIKEN cDNA 9530082P21 gene [Source:MGI Symbol;Acc:MGI:3603340]	9530082P21Rik	1.22658	1.16009	1.13246	0.505363	0.870285	0.633062	0.921306		-0.835804	0.0128012	0.00110593
protein_coding	0	ENSMUSG00000038894	insulin receptor substrate 2 [Source:MGI Symbol;Acc:MGI:109334]	Irs2	4.7885	6.36263	6.03837	12.7532	5.88136	8.37983	7.36732		0.609545	0.0129705	0.00112736
protein_coding	1	ENSMUSG00000067599	killer cell lectin-like receptor, subfamily A, member 7 [Source:MGI Symbol;Acc:MGI:101901]	Klra7	27.249	40.924	33.5537	10.639	25.8998	19.9045	26.3617		-0.742654	0.0130647	0.00114158
protein_coding	0	ENSMUSG00000021483	cyclin-dependent kinase 20 [Source:MGI Symbol;Acc:MGI:2145349]	Cdk20	0.687543	0.582611	0.554559	1.01786	0.777476	1.16342	0.797244		0.784119	0.013371	0.00119735
protein_coding	0	ENSMUSG00000003420	Fc fragment of IgG receptor and transporter [Source:MGI Symbol;Acc:MGI:103017]	Fcgrt	12.6868	7.58352	7.43949	3.80982	6.11439	5.62476	7.2098		-0.79896	0.0133907	0.00120601
lncRNA	0	ENSMUSG00000100367	predicted gene 29336 [Source:MGI Symbol;Acc:MGI:5580042]	Gm29336	3.25173	2.64947	4.43038	1.94111	2.57395	0.38211	2.53812		-2.06878	0.0133918	0.00120787
protein_coding	0	ENSMUSG00000066456	high mobility group nucleosomal binding domain 3 [Source:MGI Symbol;Acc:MGI:2138069]	Hmgn3	0.373844	0.0812279	0.488977	0.952173	0.958221	0.937182	0.631938		1.88767	0.0136868	0.00125242
protein_coding	0	ENSMUSG00000038319	potassium voltage-gated channel, subfamily H (eag-related), member 2 [Source:MGI Symbol;Acc:MGI:1341722]	Kcnh2	0.624926	0.626687	0.712591	1.1708	0.782771	1.49129	0.901511		1.02082	0.0136944	0.0012567
protein_coding	0	ENSMUSG00000021779	thyroid hormone receptor beta [Source:MGI Symbol;Acc:MGI:98743]	Thrb	1.41574	1.66108	1.19335	1.18693	1.23805	0.69503	1.2317		-0.799568	0.0138324	0.00127844
protein_coding	0	ENSMUSG00000061482	H4 clustered histone 4 [Source:MGI Symbol;Acc:MGI:2448423]	H4c4	3.37692	3.33512	4.81844	7.33034	5.4618	10.1971	5.75329		1.30466	0.0138514	0.00128201
protein_coding	0	ENSMUSG00000063021	H2A clustered histone 15 [Source:MGI Symbol;Acc:MGI:2448297]	H2ac15	2.37054	0.386297	2.8422	3.96224	2.94867	7.79971	3.38494		2.0883	0.0138948	0.00128784
protein_coding	1	ENSMUSG00000023132	granzyme A [Source:MGI Symbol;Acc:MGI:109266]	Gzma	1276.81	1370.26	1483.9	301.835	1491.31	655.977	1096.68		-0.951868	0.0141629	0.00132198
processed_pseudogene	0	ENSMUSG00000108090	predicted gene 6637 [Source:MGI Symbol;Acc:MGI:3642957]	Gm6637	11.2794	6.75616	7.70885	0.582334	4.1367	1.7195	5.36383		-2.20394	0.0141812	0.00132555
protein_coding	0	ENSMUSG00000061143	mastermind like transcriptional coactivator 3 [Source:MGI Symbol;Acc:MGI:2389461]	Maml3	1.55477	2.24407	1.60751	7.12795	3.3455	2.88146	3.12688		0.910791	0.0142628	0.00133772
protein_coding	0	ENSMUSG00000059479	UDP-GlcNAc:betaGal beta-1,3-N-acetylglucosaminyltransferase 8 [Source:MGI Symbol;Acc:MGI:2385269]	B3gnt8	0.0539632	0.0703498	0	0	0	0	0.0207188		-2.53975	0.0142628	0.00133878
protein_coding	1	ENSMUSG00000060639	H4 clustered histone 9 [Source:MGI Symbol;Acc:MGI:2448432]	H4c9	16.8191	13.3647	23.8845	21.419	20.2871	30.418	21.0321		0.74158	0.0145224	0.00137241
protein_coding	0	ENSMUSG00000064264	zinc finger protein 428 [Source:MGI Symbol;Acc:MGI:1916463]	Zfp428	1.24643	0.812465	2.56189	2.97622	2.49678	3.01306	2.18448		1.26098	0.0146981	0.0014018
processed_pseudogene	1	ENSMUSG00000104699	Rps4x retrotransposed pseudogene [Source:MGI Symbol;Acc:MGI:3644569]	Rps4x-ps	8.07678	11.6781	11.6526	14.0259	11.292	20.4316	12.8595		0.854553	0.0146981	0.00140166
processed_pseudogene	1	ENSMUSG00000094344	predicted gene 11942 [Source:MGI Symbol;Acc:MGI:3650608]	Gm11942	23.9656	29.0428	20.8975	33.2065	29.3142	45.6937	30.3534		0.711494	0.0146981	0.00140466
protein_coding	0	ENSMUSG00000053914	lysine (K)-specific demethylase 4D [Source:MGI Symbol;Acc:MGI:3606484]	Kdm4d	1.42462	1.64497	1.27773	0.738654	1.03102	0.68876	1.13429		-0.947134	0.0146981	0.00140469
protein_coding	0	ENSMUSG00000030555	tetratricopeptide repeat domain 23 [Source:MGI Symbol;Acc:MGI:1914259]	Ttc23	0.549693	0.573292	0.251644	0.249385	0.323229	0.180864	0.354685		-1.18761	0.0147029	0.00140901
protein_coding	0	ENSMUSG00000060981	H4 clustered histone 8 [Source:MGI Symbol;Acc:MGI:2448427]	H4c8	1.48663	0.969031	2.80867	3.54976	3.13802	8.85113	3.46721		2.13531	0.0148084	0.00142689
protein_coding	1	ENSMUSG00000021675	coagulation factor II (thrombin) receptor-like 2 [Source:MGI Symbol;Acc:MGI:1298208]	F2rl2	31.7429	32.4017	27.5979	8.26858	24.9686	19.0771	24.0095		-0.773878	0.0149985	0.00145307
processed_pseudogene	0	ENSMUSG00000115431	predicted pseudogene 3219 [Source:MGI Symbol;Acc:MGI:3781398]	Gm3219	3.07465	3.50727	2.68103	6.97455	5.21524	8.67125	5.02067		1.25358	0.0154067	0.00152336
lncRNA	0	ENSMUSG00000085037	RIKEN cDNA 4933421O10 gene [Source:MGI Symbol;Acc:MGI:1918323]	4933421O10Rik	1.90707	1.46014	1.8477	3.29601	2.1086	2.81726	2.23946		0.681356	0.0156049	0.00155069
TEC	0	ENSMUSG00000104698	predicted gene 42602 [Source:MGI Symbol;Acc:MGI:5662739]	Gm42602	0.072241	0.094178	0.094489	0.0344993	0	0	0.0492345		-2.38937	0.0158628	0.00159502
processed_pseudogene	1	ENSMUSG00000081926	predicted gene 15536 [Source:MGI Symbol;Acc:MGI:3782984]	Gm15536	152.206	149.151	176.366	231.232	176.504	271.766	192.871		0.692339	0.0159382	0.00160554
protein_coding	0	ENSMUSG00000001288	retinoic acid receptor, gamma [Source:MGI Symbol;Acc:MGI:97858]	Rarg	1.53047	1.67456	1.83499	4.9074	2.57127	2.56922	2.51465		0.788742	0.0163482	0.0016867
processed_pseudogene	0	ENSMUSG00000024205	ribosomal protein L36, pseudogene 2 [Source:MGI Symbol;Acc:MGI:3650081]	Rpl36-ps2	4.1189	6.34596	11.4278	10.7292	13.5496	12.6723	9.80728		1.11929	0.0165065	0.00171385
protein_coding	0	ENSMUSG00000028545	BEN domain containing 5 [Source:MGI Symbol;Acc:MGI:1914871]	Bend5	3.81721	4.18302	4.10036	8.92976	6.50605	5.92879	5.57753		0.684257	0.0165358	0.0017234
protein_coding	0	ENSMUSG00000001120	poly(rC) binding protein 3 [Source:MGI Symbol;Acc:MGI:1890470]	Pcbp3	3.93072	3.10566	2.94281	6.82599	4.31018	5.18819	4.38392		0.615728	0.0168792	0.00177467
lncRNA	0	ENSMUSG00000052658	RIKEN cDNA 5830454E08 gene [Source:MGI Symbol;Acc:MGI:1923350]	5830454E08Rik	3.75653	3.87699	3.27562	3.88692	2.40714	1.03	3.03887		-1.32761	0.0171521	0.00181857
lncRNA	0	ENSMUSG00000107458	predicted gene, 44040 [Source:MGI Symbol;Acc:MGI:5690432]	Gm44040	1.92307	1.67136	0.931598	0	0.966495	0.200871	0.948898		-2.39352	0.0171521	0.00182136
processed_pseudogene	0	ENSMUSG00000098102	predicted gene 2467 [Source:MGI Symbol;Acc:MGI:3780634]	Gm2467	1.153	1.05218	0.703772	0.110124	0.521524	0.108391	0.608165		-2.40682	0.0171669	0.00183194
protein_coding	0	ENSMUSG00000034227	forkhead box J1 [Source:MGI Symbol;Acc:MGI:1347474]	Foxj1	0.26638	0.231513	0.270991	0.763272	0.522121	0.834728	0.481501		1.51456	0.0174865	0.00189125
protein_coding	1	ENSMUSG00000020303	stanniocalcin 2 [Source:MGI Symbol;Acc:MGI:1316731]	Stc2	9.18119	6.83534	10.2035	15.4104	13.4357	11.7407	11.1345		0.587764	0.0185471	0.00207404
protein_coding	0	ENSMUSG00000052776	2'-5' oligoadenylate synthetase 1A [Source:MGI Symbol;Acc:MGI:2180860]	Oas1a	0.741342	1.36915	1.18513	0.118011	0.22355	0.34846	0.664275		-1.71425	0.018602	0.00208262
protein_coding	0	ENSMUSG00000025810	neuropilin 1 [Source:MGI Symbol;Acc:MGI:106206]	Nrp1	1.77327	1.21017	1.03775	0.886623	1.19506	0.760784	1.14394		-0.723592	0.0186823	0.00209406
protein_coding	0	ENSMUSG00000031012	calcium/calmodulin-dependent serine protein kinase (MAGUK family) [Source:MGI Symbol;Acc:MGI:1309489]	Cask	0.420222	0.249013	0.499671	0.88786	0.829421	0.598549	0.580789		0.904733	0.0192203	0.00220728
protein_coding	0	ENSMUSG00000046668	CXXC finger 5 [Source:MGI Symbol;Acc:MGI:1914643]	Cxxc5	2.168	1.41317	2.16051	4.99185	3.04697	3.38469	2.86086		0.924577	0.0196086	0.00226216
protein_coding	0	ENSMUSG00000021760	glutathione peroxidase 8 (putative) [Source:MGI Symbol;Acc:MGI:1916840]	Gpx8	0.222238	0.434585	0.678253	0	0.100523	0	0.239266		-2.68337	0.0196476	0.00227629
protein_coding	1	ENSMUSG00000024659	annexin A1 [Source:MGI Symbol;Acc:MGI:96819]	Anxa1	48.8053	55.0205	55.6034	12.1122	51.8235	26.5131	41.6463		-0.929195	0.0198165	0.00230951
NA	0	ENSMUSG00000093843	NA	NA	0	0	0	2.91167	1.10312	2.29266	1.05124		2.85477	0.0202991	0.00239769
processed_pseudogene	0	ENSMUSG00000100561	predicted gene 7516 [Source:MGI Symbol;Acc:MGI:3643007]	Gm7516	0.989682	1.72028	1.00681	2.83578	1.93983	3.41139	1.98396		1.26227	0.0202991	0.00239506
protein_coding	0	ENSMUSG00000023009	NCK-associated protein 5-like [Source:MGI Symbol;Acc:MGI:3609653]	Nckap5l	4.67952	4.30982	5.23759	13.1416	4.73876	7.15677	6.54401		0.655298	0.020458	0.00243227
TEC	0	ENSMUSG00000102759	predicted gene 10463 [Source:MGI Symbol;Acc:MGI:3642170]	Gm10463	0.120927	0.210197	0.210891	0.0769995	0.145861	0	0.127479		-2.44788	0.020458	0.00243519
protein_coding	0	ENSMUSG00000032092	myelin protein zero-like 2 [Source:MGI Symbol;Acc:MGI:1289160]	Mpzl2	0	0	0	0.0478871	0.0302376	0.0314221	0.0182578		2.17792	0.0212836	0.0025958
protein_coding	0	ENSMUSG00000058297	sparc/osteonectin, cwcv and kazal-like domains proteoglycan 2 [Source:MGI Symbol;Acc:MGI:1891351]	Spock2	2.08364	1.17984	2.31241	3.05554	2.81791	2.77001	2.36989		0.721338	0.0213816	0.00262928
processed_pseudogene	1	ENSMUSG00000081434	predicted gene 14165 [Source:MGI Symbol;Acc:MGI:3650537]	Gm14165	9.6636	9.72763	10.4531	14.3706	13.3898	15.0643	12.1115		0.597058	0.0215418	0.00266592
lncRNA	0	ENSMUSG00000112302	predicted gene, 48226 [Source:MGI Symbol;Acc:MGI:6097627]	Gm48226	2.82892	1.68285	2.94574	4.90547	3.42878	3.718	3.25163		0.70316	0.021598	0.00268137
protein_coding	0	ENSMUSG00000015134	aldehyde dehydrogenase family 1, subfamily A3 [Source:MGI Symbol;Acc:MGI:1861722]	Aldh1a3	0.0756677	0.0328817	0.0219935	0	0	0	0.0217572		-2.32909	0.0218939	0.00274667
protein_coding	0	ENSMUSG00000040594	RAN binding protein 17 [Source:MGI Symbol;Acc:MGI:1929706]	Ranbp17	0.0130949	0.0682851	0.137021	0.137578	0.130308	0.160033	0.10772		1.81076	0.0219482	0.00275649
protein_coding	0	ENSMUSG00000044703	PHD finger protein 11A [Source:MGI Symbol;Acc:MGI:1918441]	Phf11a	10.1487	13.9033	11.5493	7.311	6.69123	7.60015	9.53396		-0.629229	0.0219612	0.00276677
processed_pseudogene	1	ENSMUSG00000091460	predicted pseudogene 7808 [Source:MGI Symbol;Acc:MGI:3643360]	Gm7808	21.9665	26.2832	23.0902	34.2012	25.5884	46.3923	29.587		0.784493	0.0219945	0.00279138
protein_coding	0	ENSMUSG00000059326	colony stimulating factor 2 receptor, alpha, low-affinity (granulocyte-macrophage) [Source:MGI Symbol;Acc:MGI:1339754]	Csf2ra	1.9064	2.00939	2.26361	2.94432	2.56857	3.35554	2.50797		0.669548	0.0219945	0.00278676
processed_pseudogene	1	ENSMUSG00000061848	predicted gene 5805 [Source:MGI Symbol;Acc:MGI:3644633]	Gm5805	27.3255	38.6196	40.3059	47.8075	34.4229	57.138	40.9366		0.646957	0.0219945	0.00277828
protein_coding	0	ENSMUSG00000063383	zinc finger protein 947 [Source:MGI Symbol;Acc:MGI:3646759]	Zfp947	0.121643	0.0528603	0.176783	0.271093	0.403491	0.381179	0.234508		1.72018	0.0220035	0.00279805
protein_coding	0	ENSMUSG00000054752	fibronectin type III and SPRY domain containing 1-like [Source:MGI Symbol;Acc:MGI:2442443]	Fsd1l	1.88926	1.80825	1.57441	6.48693	2.54202	2.82145	2.85372		0.790541	0.0220082	0.00280154
protein_coding	0	ENSMUSG00000029913	PR domain containing 5 [Source:MGI Symbol;Acc:MGI:1918029]	Prdm5	0.0501141	0.146997	0.14202	0.622242	0.158674	0.318	0.239674		1.7155	0.0224732	0.00293937
TEC	0	ENSMUSG00000114995	predicted gene, 49284 [Source:MGI Symbol;Acc:MGI:6118771]	Gm49284	2.76462	2.20661	2.45989	3.39497	3.98117	3.87192	3.1132		0.629811	0.022597	0.0029624
TR_V_gene	0	ENSMUSG00000095426	T cell receptor alpha variable 6D-5 [Source:MGI Symbol;Acc:MGI:3649416]	Trav6d-5	2.0672	1.79663	3.30469	4.60698	5.61025	5.18223	3.76133		1.22853	0.0226093	0.00296698
lncRNA	0	ENSMUSG00000103983	predicted gene, 20045 [Source:MGI Symbol;Acc:MGI:5012230]	Gm20045	0.48026	0.462767	0.655476	0.737915	0.887817	0.922594	0.691138		0.840615	0.023045	0.00305135
protein_coding	0	ENSMUSG00000079502	cilia and flagella associated protein 77 [Source:MGI Symbol;Acc:MGI:2685669]	Cfap77	1.15387	1.04141	0.967456	1.69551	1.96724	1.91914	1.45744		0.820247	0.0230535	0.00305852
protein_coding	0	ENSMUSG00000027603	gamma-glutamyltransferase 7 [Source:MGI Symbol;Acc:MGI:1913385]	Ggt7	3.31804	3.16281	4.07546	5.35001	3.77626	5.66826	4.22514		0.65268	0.0232908	0.00311136
processed_pseudogene	1	ENSMUSG00000086567	predicted gene 2830 [Source:MGI Symbol;Acc:MGI:3781002]	Gm2830	10.8891	18.1389	20.0451	23.9785	16.4179	32.1315	20.2668		0.93461	0.0234441	0.00314721
protein_coding	0	ENSMUSG00000058287	predicted gene 12253 [Source:MGI Symbol;Acc:MGI:3651568]	Gm12253	4.98101	3.47069	3.07029	1.14835	2.01995	2.01834	2.78477		-1.06168	0.0235929	0.00319812
processed_pseudogene	1	ENSMUSG00000062461	ribosomal protein L27A, pseudogene 4 [Source:MGI Symbol;Acc:MGI:3648523]	Rpl27a-ps4	9.63925	10.8682	11.5856	20.155	11.5482	19.5928	13.8982		0.799633	0.0236373	0.00321035
lncRNA	0	ENSMUSG00000086836	predicted gene 13748 [Source:MGI Symbol;Acc:MGI:3702115]	Gm13748	0.924226	1.20488	0.537271	0	0.557397	0	0.537296		-2.52169	0.0236373	0.00321092
lncRNA	0	ENSMUSG00000102336	predicted gene, 37233 [Source:MGI Symbol;Acc:MGI:5610461]	Gm37233	2.54734	2.39976	2.36715	1.59833	2.25397	1.29349	2.07667		-0.726203	0.0236649	0.00322649
protein_coding	0	ENSMUSG00000017412	calcium channel, voltage-dependent, beta 4 subunit [Source:MGI Symbol;Acc:MGI:103301]	Cacnb4	0.428755	0.457325	0.339878	0.21096	0.329102	0.207639	0.328943		-0.868786	0.0238003	0.00326368
protein_coding	0	ENSMUSG00000002799	jagged 2 [Source:MGI Symbol;Acc:MGI:1098270]	Jag2	0.718946	0.653905	1.1955	1.30948	1.21003	1.28886	1.06279		0.767144	0.0241457	0.00334702
processed_pseudogene	0	ENSMUSG00000046687	predicted gene 5424 [Source:MGI Symbol;Acc:MGI:3643173]	Gm5424	7.70089	8.69262	6.30557	4.57461	6.20194	4.85573	6.38856		-0.604329	0.0243906	0.00338938
protein_coding	0	ENSMUSG00000031523	deleted in liver cancer 1 [Source:MGI Symbol;Acc:MGI:1354949]	Dlc1	0.0158504	0	0.0207318	0.0681252	0.0358473	0.0372514	0.0296343		1.93863	0.0244214	0.00340968
protein_coding	0	ENSMUSG00000058385	H2B clustered histone 8 [Source:MGI Symbol;Acc:MGI:2448386]	H2bc8	1.50748	0.98262	1.4788	4.49942	1.70466	5.13716	2.55169		1.64426	0.0244463	0.00341635
protein_coding	0	ENSMUSG00000072294	Kruppel-like factor 12 [Source:MGI Symbol;Acc:MGI:1333796]	Klf12	0.350108	0.565095	0.537886	1.25796	0.678691	0.814986	0.700787		0.899481	0.0245003	0.00343675
protein_coding	0	ENSMUSG00000020890	guanylate cyclase 2e [Source:MGI Symbol;Acc:MGI:105123]	Gucy2e	0.734397	0.99042	0.397476	0.205593	0.641458	0.309486	0.546471		-1.10942	0.0247128	0.00349368
IG_C_gene	0	ENSMUSG00000095079	immunoglobulin heavy constant alpha [Source:MGI Symbol;Acc:MGI:96444]	Igha	2.05145	1.99157	2.05524	4.00213	2.80349	3.56982	2.74562		0.787705	0.0247689	0.0035134
[truncated: 150 more rows]
