# Supplementary material for: PIM kinase control of CD8 T cell protein synthesis and cell trafficking
Source: eLife. 2025 May 13;13:RP98622. doi: 10.7554/eLife.98622 (PMC12074636; doi:10.7554/eLife.98622)
Supplement: Supplementary file 3. [file elife-98622-supp3.xlsx]

## Sheet: estimated copies per cell
Day 6, IL15 expanded CD8 T cells, Proteomics					ESTIMATED COPY NUMBER PER CELL							AVERAGE COPIES			MitoCarta3.0_Annotation					NUMBER OF PEPTIDES (stripped sequence) USED FOR QUANTIFICATION
black text - proteins quantified by >=2 peptides in at least two bio reps of one condition, grey text - proteins quantified by fewer peptides than this					WT			Pim dKO				WT	Pim dKO							WT			Pim dKO
	Protein_Group_IDs (uniprot)	Protein description	Protein names	Gene names	BR1	BR2	BR3	BR1	BR2	BR3					MitoCarta 3.0 List	Evidence	SubMitoLocalization	MitoPathways		BR1	BR2	BR3	BR1	BR2	BR3
	Q6GQT1	Alpha-2-macroglobulin-P	A2MG_MOUSE	A2m	1196	961	902	1071	912	757		1019.67	913.333			MS/MS				3	3	3	3	3	3
	P58742	Aladin	AAAS_MOUSE	Aaas	16257	17513	15741	14855	15108	15255		16503.7	15072.7			mito protein domain				19	20	19	19	18	19
	Q9D2R0	Acetoacetyl-CoA synthetase	AACS_MOUSE	Aacs	35591	37088	35418	26881	30588	30875		36032.3	29448			mito protein domain, coexpression				24	24	23	24	23	23
	Q8R2R3	Alpha- and gamma-adaptin-binding protein p34	AAGAB_MOUSE	Aagab	4603	4053	4117	2837	3962	4017		4257.67	3605.33							6	6	6	6	6	6
	Q3UHJ0	AP2-associated protein kinase 1	AAK1_MOUSE	Aak1	23493	22495	22131	16290	20942	19743		22706.3	18991.7			mito protein domain, MS/MS				30	30	30	30	30	30
	Q8R0P4	Mth938 domain-containing protein	AAMDC_MOUSE	Aamdc	7271	7385	7219	6931	6783	6758		7291.67	6824			mito protein domain				3	3	3	3	3	3
	J3QN89;Q3TJ22	Angio-associated migratory protein	J3QN89_MOUSE;Q3TJ22_MOUSE	Aamp	5042	4209	4658	3647	4084	4482		4636.33	4071			mito protein domain				7	6	7	7	7	7
	Q9D2V5	Protein AAR2 homolog	AAR2_MOUSE	Aar2	5644	1856	1746	3280	941	2101		3082	2107.33							6	6	6	6	5	5
	Q8BGQ7	Alanine--tRNA ligase, cytoplasmic	SYAC_MOUSE	Aars1	56728	56165	54306	36765	48982	46624		55733	44123.7			yeast mito homolog, Rickettsial homolog, mito protein domain				49	49	51	51	48	48
	Q14CH7	Alanine--tRNA ligase, mitochondrial	SYAM_MOUSE	Aars2	580	567	540	2780	3926	457		562.333	2387.67		MitoCarta3.0	literature, APEX_matrix, targetP signal, yeast mito homolog, Rickettsial homolog, mito protein domain, MS/MS	Matrix	Mitochondrial central dogma > Translation > mt-tRNA synthetases		7	7	6	7	5	6
	Q3THG9	Alanyl-tRNA editing protein Aarsd1	AASD1_MOUSE	Aarsd1	19615	19248	18960	16009	18836	19180		19274.3	18008.3			Rickettsial homolog, mito protein domain				12	12	12	13	12	12
	Q9CQF6	L-aminoadipate-semialdehyde dehydrogenase-phosphopantetheinyl transferase	ADPPT_MOUSE	Aasdhppt	1498	1425	1288	1272	1314	1291		1403.67	1292.33			Rickettsial homolog, coexpression				5	5	5	5	5	5
	Q9JKX4	Protein AATF	AATF_MOUSE	Aatf	10956	11288	10707	11296	10647	11533		10983.7	11158.7							18	18	17	18	18	18
	Q91V24	ATP-binding cassette sub-family A member 7	ABCA7_MOUSE	Abca7	26	10	12	13	5	13		16	10.3333			Rickettsial homolog, mito protein domain, induction				2	1	1	2	1	2
	Q9JI39	ATP-binding cassette sub-family B member 10, mitochondrial	ABCBA_MOUSE	Abcb10	698	503	477	270	156	405		559.333	277		MitoCarta3.0	literature, APEX_matrix, targetP signal+, yeast mito homolog+, Rickettsial homolog, mito protein domain, induction, coexpression, MS/MS+	MIM	Metabolism > Metals and cofactors > Heme synthesis and processing | Small molecule transport > ABC transporters		4	4	4	3	2	4
	P21447	ATP-dependent translocase ABCB1	MDR1A_MOUSE	Abcb1a	6980	6062	6010	3789	6154	5524		6350.67	5155.67			Rickettsial homolog, mito protein domain, MS/MS				21	20	21	21	20	20
	P06795	ATP-dependent translocase ABCB1	MDR1B_MOUSE	Abcb1b	2218	2032	2184	1821	2258	1886		2144.67	1988.33			Rickettsial homolog, mito protein domain, coexpression				11	11	11	11	11	11
	Q61102	ATP-binding cassette sub-family B member 7, mitochondrial	ABCB7_MOUSE	Abcb7	10298	10990	8741	8721	9422	8881		10009.7	9008		MitoCarta3.0	literature, APEX_matrix, targetP signal, yeast mito homolog+, Rickettsial homolog, mito protein domain, coexpression+, MS/MS+	MIM	Metabolism > Metals and cofactors > Heme synthesis and processing | Metabolism > Metals and cofactors > Fe-S cluster biosynthesis | Metabolism > Metals and cofactors > Molybdenum cofactor synthesis and proteins | Small molecule transport > ABC transporters		22	23	21	23	24	23
	Q9CXJ4	Mitochondrial potassium channel ATP-binding subunit	MITOS_MOUSE	Abcb8	7741	8304	8038	7094	6323	7546		8027.67	6987.67		MitoCarta3.0	literature, targetP signal, yeast mito homolog, Rickettsial homolog, mito protein domain, coexpression++, MS/MS++	MIM	Small molecule transport > ABC transporters		3	3	3	3	3	3
	Q9JJ59;Q9JJ59-2	ATP-binding cassette sub-family B member 9;Isoform 2 of ATP-binding cassette sub-family B member 9	ABCB9_MOUSE	Abcb9	41	73	89	24	84	62		67.6667	56.6667			yeast mito homolog+, Rickettsial homolog, mito protein domain				1	2	2	1	2	2
	O35379	Multidrug resistance-associated protein 1	MRP1_MOUSE	Abcc1	1536	1446	846	947	1237	1273		1276	1152.33			Rickettsial homolog, mito protein domain				20	21	17	19	20	21
	E9Q236;E9Q467	ATP-binding cassette, sub-family C (CFTR/MRP), member 4;ATP-binding cassette, sub-family C (CFTR/MRP), member 4	E9Q236_MOUSE;E9Q467_MOUSE	Abcc4	233	210	236	223	179	195		226.333	199			Rickettsial homolog, mito protein domain				3	3	4	4	3	3
	P48410	ATP-binding cassette sub-family D member 1	ABCD1_MOUSE	Abcd1	5160	6067	6059	5102	6063	5753		5762	5639.33		MitoCarta3.0	targetP signal, Rickettsial homolog, mito protein domain, induction	Membrane	Small molecule transport > ABC transporters		11	11	10	11	11	10
	P55096	ATP-binding cassette sub-family D member 3	ABCD3_MOUSE	Abcd3	1750	1641	1568	1532	1442	1488		1653	1487.33		MitoCarta3.0	GFP, targetP signal, Rickettsial homolog, mito protein domain, induction, coexpression	Membrane	Small molecule transport > ABC transporters		9	7	8	8	7	8
	P61222	ATP-binding cassette sub-family E member 1	ABCE1_MOUSE	Abce1	115852	105580	108071	81131	107176	102034		109834	96780.3			Rickettsial homolog, mito protein domain				32	31	31	31	32	32
	Q6P542	ATP-binding cassette sub-family F member 1	ABCF1_MOUSE	Abcf1	51820	51184	51710	38189	47502	45157		51571.3	43616			Rickettsial homolog, mito protein domain, coexpression				37	38	35	38	35	38
	Q99LE6	ATP-binding cassette sub-family F member 2	ABCF2_MOUSE	Abcf2	46142	49667	46741	33198	41232	40699		47516.7	38376.3			literature, Rickettsial homolog, mito protein domain				30	32	30	32	31	33
	Q8K268	ATP-binding cassette sub-family F member 3	ABCF3_MOUSE	Abcf3	11582	12288	12370	9923	11471	11515		12080	10969.7			Rickettsial homolog, mito protein domain				19	19	19	19	19	19
	Q64343	ATP-binding cassette sub-family G member 1	ABCG1_MOUSE	Abcg1	202	139	98	153	177	138		146.333	156			Rickettsial homolog, mito protein domain				2	2	1	2	1	1
	Q99P81	ATP-binding cassette sub-family G member 3	ABCG3_MOUSE	Abcg3	582	574	444	425	401	489		533.333	438.333			Rickettsial homolog, mito protein domain				4	5	4	4	3	5
	Q6PE15	Mycophenolic acid acyl-glucuronide esterase, mitochondrial	ABHDA_MOUSE	Abhd10	2643	2506	2260	2173	2244	2140		2469.67	2185.67		MitoCarta3.0	literature, APEX_IMS, APEX_matrix, targetP signal+, Rickettsial homolog, mito protein domain, MS/MS++	Matrix	Metabolism > Detoxification > Xenobiotic metabolism		5	5	5	5	5	5
	Q8K4F5	Protein ABHD11	ABHDB_MOUSE	Abhd11	4367	4148	3652	3611	3073	2733		4055.67	3139		MitoCarta3.0	literature, APEX_matrix, targetP signal+, yeast mito homolog++, Rickettsial homolog, mito protein domain, coexpression+, MS/MS++	Matrix	Metabolism > Carbohydrate metabolism > TCA-associated		5	5	5	5	5	5
	Q99LR1	Lysophosphatidylserine lipase ABHD12	ABD12_MOUSE	Abhd12	7584	7660	6895	6268	7008	7002		7379.67	6759.33			yeast mito homolog, Rickettsial homolog, mito protein domain				11	11	11	12	11	12
	Q80UX8	Protein ABHD13	ABHDD_MOUSE	Abhd13	742	575	491	397	485	457		602.667	446.333			yeast mito homolog, Rickettsial homolog, mito protein domain				3	3	3	3	3	3
	Q8VCR7	Protein ABHD14B	ABHEB_MOUSE	Abhd14b	2966	2646	2607	1774	2394	2261		2739.67	2143							4	4	4	3	4	4
	Q5F2F2	Protein ABHD15	ABH15_MOUSE	Abhd15	256	250	231	154	251	218		245.667	207.667			yeast mito homolog				2	2	2	2	2	2
	Q9Z1Q2	Phosphatidylserine lipase ABHD16A	ABHGA_MOUSE	Abhd16a	3743	4370	3464	3070	2986	3353		3859	3136.33			yeast mito homolog, mito protein domain				8	9	8	9	8	9
	Q99JW1	Alpha/beta hydrolase domain-containing protein 17A	AB17A_MOUSE	Abhd17a	1246	786	2164	541	713	640		1398.67	631.333			yeast mito homolog				2	2	2	2	2	2
	Q7M759	Alpha/beta hydrolase domain-containing protein 17B	AB17B_MOUSE	Abhd17b	1098	952	1376	1148	1336	1250		1142	1244.67			yeast mito homolog				2	2	3	3	3	3
	Q9DBL9;Q9DBL9-2	1-acylglycerol-3-phosphate O-acyltransferase ABHD5;Isoform 2 of 1-acylglycerol-3-phosphate O-acyltransferase ABHD5	ABHD5_MOUSE	Abhd5	386	353	344	238	326	268		361	277.333			mito protein domain, induction, coexpression				2	2	2	2	2	2
	Q8R2Y0;Q8R2Y0-2	Monoacylglycerol lipase ABHD6;Isoform 2 of Monoacylglycerol lipase ABHD6	ABHD6_MOUSE	Abhd6	1923	1668	1254	1135	1073	1415		1615	1207.67			Rickettsial homolog, mito protein domain, MS/MS				5	6	5	6	4	6
	Q8CBW3;Q8CBW3-2;Q8CBW3-3;Q8CBW3-4	Abl interactor 1;Isoform 2 of Abl interactor 1;Isoform 3 of Abl interactor 1;Isoform 4 of Abl interactor 1	ABI1_MOUSE	Abi1	35442	35395	35249	27904	33694	30814		35362	30804			mito protein domain				19	18	19	18	19	19
	Q8BYZ1	ABI gene family member 3	ABI3_MOUSE	Abi3	17490	17714	15429	12695	16589	14215		16877.7	14499.7			mito protein domain				13	13	13	13	12	13
	Q80ZQ9	Protein Abitram	ABITM_MOUSE	Abitram	16490	15319	14986	14013	14373	14563		15598.3	14316.3			mito protein domain+				9	9	9	9	9	9
	Q8K4G5;Q8K4G5-2;Q8K4G5-3	Actin-binding LIM protein 1;Isoform 2 of Actin-binding LIM protein 1;Isoform 3 of Actin-binding LIM protein 1	ABLM1_MOUSE	Ablim1	12343	14106	12767	10063	11901	10410		13072	10791.3							22	22	22	22	21	22
	Q5SSL4;Q5SSL4-2	Active breakpoint cluster region-related protein;Isoform 2 of Active breakpoint cluster region-related protein	ABR_MOUSE	Abr	15824	17070	16156	12663	12326	13148		16350	12712.3			mito protein domain				26	27	27	24	26	25
	Q4KML4	Costars family protein ABRACL	ABRAL_MOUSE	Abracl	490194	323318	322411	219941	386381	319230		378641	308517							3	3	3	3	3	3
	Q8BPZ8	BRCA1-A complex subunit Abraxas 1	ABRX1_MOUSE	Abraxas1	4042	3765	1889	2799	2631	1987		3232	2472.33							5	5	5	4	5	4
	Q3TCJ1	BRISC complex subunit Abraxas 2	ABRX2_MOUSE	Abraxas2	8070	8285	8037	6829	7756	7864		8130.67	7483							11	11	11	11	11	11
	Q9QYL7	Activator of basal transcription 1	ABT1_MOUSE	Abt1	7413	7936	8068	6918	7015	6977		7805.67	6970							8	8	8	8	8	8
	Q921H8	3-ketoacyl-CoA thiolase A, peroxisomal	THIKA_MOUSE	Acaa1a	67149	77117	72992	55688	61433	61246		72419.3	59455.7		MitoCarta3.0	targetP signal, yeast mito homolog+, Rickettsial homolog, mito protein domain, coexpression	Matrix	Metabolism > Lipid metabolism > Fatty acid oxidation		21	20	19	21	19	20
	Q8BWT1	3-ketoacyl-CoA thiolase, mitochondrial	THIM_MOUSE	Acaa2	131990	129204	131754	137666	113808	130643		130983	127372		MitoCarta3.0	literature, APEX_matrix, targetP signal, Rickettsial homolog, mito protein domain, induction, coexpression+, MS/MS++	Matrix	Metabolism > Carbohydrate metabolism > Ketone metabolism | Metabolism > Lipid metabolism > Fatty acid oxidation | Metabolism > Amino acid metabolism > Lysine metabolism		23	22	23	24	23	22
	Q5SWU9;Q5SWU9-2	Acetyl-CoA carboxylase 1;Isoform 2 of Acetyl-CoA carboxylase 1	ACACA_MOUSE	Acaca	15494	15375	15829	9435	14130	13454		15566	12339.7		MitoCarta3.0	yeast mito homolog, Rickettsial homolog, mito protein domain, coexpression	Matrix	Metabolism > Lipid metabolism > Type II fatty acid synthesis | Metabolism > Vitamin metabolism > Biotin utilizing proteins		91	91	91	90	90	91
	Q8K370	Acyl-CoA dehydrogenase family member 10	ACD10_MOUSE	Acad10	183	179	158	190	121	150		173.333	153.667		MitoCarta3.0	APEX_matrix, targetP signal+, mito protein domain+, coexpression, MS/MS++	Matrix	Metabolism > Lipid metabolism > Fatty acid oxidation		3	3	3	3	3	3
	Q80XL6	Acyl-CoA dehydrogenase family member 11	ACD11_MOUSE	Acad11	310	299	277	209	267	260		295.333	245.333		MitoCarta3.0	mito protein domain+, induction, coexpression	MIM	Metabolism > Lipid metabolism > Fatty acid oxidation		3	3	3	3	3	3
	Q9D7B6	Isobutyryl-CoA dehydrogenase, mitochondrial	ACAD8_MOUSE	Acad8	4423	5089	4473	5128	3340	4373		4661.67	4280.33		MitoCarta3.0	literature, APEX_matrix, targetP signal+, mito protein domain+, coexpression, MS/MS++	Matrix	Metabolism > Amino acid metabolism > Branched-chain amino acid metabolism		8	8	7	8	7	8
	Q8JZN5	Complex I assembly factor ACAD9, mitochondrial	ACAD9_MOUSE	Acad9	26466	26298	23848	24212	22048	23005		25537.3	23088.3		MitoCarta3.0	literature, APEX_matrix, targetP signal+, mito protein domain+, MS/MS++	MIM	OXPHOS > Complex I > CI assembly factors | OXPHOS > OXPHOS assembly factors		29	30	30	29	28	29
	P51174	Long-chain specific acyl-CoA dehydrogenase, mitochondrial	ACADL_MOUSE	Acadl	128514	134576	123339	106389	117094	113834		128810	112439		MitoCarta3.0	literature, targetP signal+, mito protein domain+, induction, coexpression+, MS/MS++	MIM	Metabolism > Lipid metabolism > Fatty acid oxidation		23	23	23	23	23	23
	P45952	Medium-chain specific acyl-CoA dehydrogenase, mitochondrial	ACADM_MOUSE	Acadm	27580	28197	25887	25227	24612	24762		27221.3	24867		MitoCarta3.0	literature, APEX_matrix, targetP signal, mito protein domain+, induction, coexpression++, MS/MS++	Matrix	Metabolism > Lipid metabolism > Fatty acid oxidation		13	13	12	12	12	13
	Q07417	Short-chain specific acyl-CoA dehydrogenase, mitochondrial	ACADS_MOUSE	Acads	55799	72688	69510	65080	51025	67036		65999	61047		MitoCarta3.0	literature, APEX_matrix, targetP signal+, mito protein domain+, induction, coexpression++, MS/MS++	Matrix	Metabolism > Lipid metabolism > Fatty acid oxidation		18	18	18	18	18	18
	Q9DBL1	Short/branched chain specific acyl-CoA dehydrogenase, mitochondrial	ACDSB_MOUSE	Acadsb	5195	4759	3998	3907	4322	3710		4650.67	3979.67		MitoCarta3.0	literature, APEX_matrix, targetP signal, mito protein domain+, induction, coexpression, MS/MS++	Matrix	Metabolism > Lipid metabolism > Fatty acid oxidation | Metabolism > Amino acid metabolism > Branched-chain amino acid metabolism		8	8	8	8	8	8
	P50544	Very long-chain specific acyl-CoA dehydrogenase, mitochondrial	ACADV_MOUSE	Acadvl	48573	47147	42278	33136	44871	43759		45999.3	40588.7		MitoCarta3.0	literature, APEX_matrix, targetP signal+, mito protein domain+, coexpression+, MS/MS++	MIM	Metabolism > Lipid metabolism > Fatty acid oxidation		38	37	36	38	33	36
	Q8K2H4	Arf-GAP with coiled-coil, ANK repeat and PH domain-containing protein 1	ACAP1_MOUSE	Acap1	32956	32737	31073	25759	29516	29531		32255.3	28268.7			Rickettsial homolog, mito protein domain				37	36	34	37	35	35
	Q6ZQK5	Arf-GAP with coiled-coil, ANK repeat and PH domain-containing protein 2	ACAP2_MOUSE	Acap2	4994	4732	4613	3403	4554	4390		4779.67	4115.67			Rickettsial homolog, mito protein domain				15	16	15	16	16	16
	Q8QZT1	Acetyl-CoA acetyltransferase, mitochondrial	THIL_MOUSE	Acat1	131851	143118	137268	116044	126855	125554		137412	122818		MitoCarta3.0	literature, APEX_matrix, targetP signal, Rickettsial homolog, mito protein domain, induction, coexpression+, MS/MS++	Matrix	Metabolism > Carbohydrate metabolism > Ketone metabolism | Metabolism > Lipid metabolism > Fatty acid oxidation | Metabolism > Amino acid metabolism > Branched-chain amino acid metabolism | Metabolism > Amino acid metabolism > Lysine metabolism		22	22	21	22	21	23
	Q8CAY6	Acetyl-CoA acetyltransferase, cytosolic	THIC_MOUSE	Acat2	38965	36828	40839	29563	35329	36301		38877.3	33731			Rickettsial homolog, mito protein domain, coexpression				15	14	15	14	14	14
	Q8BMP6	Golgi resident protein GCP60	GCP60_MOUSE	Acbd3	19267	22625	11408	14890	19402	17368		17766.7	17220			mito protein domain				14	14	14	14	14	14
	Q5XG73;Q5XG73-2;Q5XG73-3	Acyl-CoA-binding domain-containing protein 5;Isoform 2 of Acyl-CoA-binding domain-containing protein 5;Isoform 3 of Acyl-CoA-binding domain-containing protein 5	ACBD5_MOUSE	Acbd5	328	336	381	254	376	333		348.333	321			mito protein domain				2	2	2	2	2	2
	Q9D061	Acyl-CoA-binding domain-containing protein 6	ACBD6_MOUSE	Acbd6	1453	1193	1195	552	1092	1166		1280.33	936.667			Rickettsial homolog, mito protein domain				4	4	4	2	4	4
	Q5EE38	Adrenocortical dysplasia protein	ACD_MOUSE	Acd	3653	3234	3280	2821	3402	3296		3389	3173							7	7	7	7	7	7
	Q9JIX8;Q9JIX8-4	Apoptotic chromatin condensation inducer in the nucleus;Isoform 4 of Apoptotic chromatin condensation inducer in the nucleus	ACINU_MOUSE	Acin1	33781	32815	33793	29322	34419	32895		33463	32212			mito protein domain				48	48	46	48	47	49
	Q91V92	ATP-citrate synthase	ACLY_MOUSE	Acly	80046	72266	77507	51215	70974	64437		76606.3	62208.7		MitoCarta3.0	APEX_matrix, yeast mito homolog+, Rickettsial homolog, mito protein domain, coexpression	Matrix	Metabolism > Carbohydrate metabolism > TCA-associated		59	59	58	58	58	58
	P28271	Cytoplasmic aconitate hydratase	ACOC_MOUSE	Aco1	21981	22262	21746	15952	16804	17321		21996.3	16692.3			yeast mito homolog, Rickettsial homolog, mito protein domain, coexpression				29	30	30	30	29	30
	Q99KI0	Aconitate hydratase, mitochondrial	ACON_MOUSE	Aco2	177490	188130	181336	162777	175656	171556		182319	169996		MitoCarta3.0	literature, APEX_matrix, targetP signal, yeast mito homolog, Rickettsial homolog, mito protein domain, induction, coexpression++, MS/MS++	Matrix	Metabolism > Carbohydrate metabolism > TCA cycle | Metabolism > Metals and cofactors > Fe-S-containing proteins		44	44	43	43	44	43
	Q8VHQ9	Acyl-coenzyme A thioesterase 11	ACO11_MOUSE	Acot11	1053	1075	941	638	794	811		1023	747.667		MitoCarta3.0	literature,targetP signal, mito protein domain, coexpression	Matrix	Metabolism > Lipid metabolism > Fatty acid oxidation		4	4	4	4	4	4
	Q9CQR4	Acyl-coenzyme A thioesterase 13	ACO13_MOUSE	Acot13	38930	34676	33074	32982	33883	34750		35560	33871.7		MitoCarta3.0	mito protein domain, induction, coexpression, MS/MS++	Matrix	Metabolism > Lipid metabolism		6	6	6	6	6	6
	Q9QYR9	Acyl-coenzyme A thioesterase 2, mitochondrial	ACOT2_MOUSE	Acot2	7839	7620	7186	7743	7209	7396		7548.33	7449.33		MitoCarta3.0	literature, targetP signal, mito protein domain, induction, coexpression, MS/MS++	Matrix	Metabolism > Lipid metabolism		11	11	10	11	11	11
	Q91V12-2	Isoform A of Cytosolic acyl coenzyme A thioester hydrolase	BACH_MOUSE	Acot7	201084	208404	201547	147691	159716	168760		203678	158722		MitoCarta3.0	targetP signal, mito protein domain, induction	Matrix	Metabolism > Lipid metabolism		20	21	20	22	20	21
	P58137	Acyl-coenzyme A thioesterase 8	ACOT8_MOUSE	Acot8	12107	11802	11519	7061	11653	10663		11809.3	9792.33			yeast mito homolog				13	13	13	13	12	12
	Q9R0X4	Acyl-coenzyme A thioesterase 9, mitochondrial	ACOT9_MOUSE	Acot9	31285	32776	28173	27319	25057	26187		30744.7	26187.7		MitoCarta3.0	literature, targetP signal, MS/MS++	MIM	Metabolism > Lipid metabolism		24	25	25	24	22	23
	Q9EPL9	Peroxisomal acyl-coenzyme A oxidase 3	ACOX3_MOUSE	Acox3	2610	2744	2644	1996	2227	2302		2666	2175			mito protein domain+, induction				11	11	10	11	9	11
	Q9D358	Low molecular weight phosphotyrosine protein phosphatase	PPAC_MOUSE	Acp1	133011	111209	114746	90843	105987	106554		119655	101128			MS/MS				7	7	7	7	7	7
	Q8CE08;Q8CE08-2	Prostatic acid phosphatase;Isoform 2 of Prostatic acid phosphatase	PPAP_MOUSE	Acp3	2109	1683	1396	657	1135	1079		1729.33	957			mito protein domain				5	6	5	6	5	5
	Q05117	Tartrate-resistant acid phosphatase type 5	PPA5_MOUSE	Acp5	31768	35359	33243	20880	25498	27642		33456.7	24673.3							8	8	8	7	8	8
	Q8BP40	Lysophosphatidic acid phosphatase type 6	PPA6_MOUSE	Acp6	3213	3035	3107	3609	3247	3167		3118.33	3341		MitoCarta3.0	literature, APEX_IMS, targetP signal, mito protein domain, MS/MS++	IMS	Metabolism > Lipid metabolism > Phospholipid metabolism		6	6	6	6	6	6
	Q8VCW8	Medium-chain acyl-CoA ligase ACSF2, mitochondrial	ACSF2_MOUSE	Acsf2	20646	21048	20495	14605	19064	18185		20729.7	17284.7		MitoCarta3.0	APEX_matrix, targetP signal, Rickettsial homolog, mito protein domain, MS/MS++	Matrix	Metabolism > Lipid metabolism > Fatty acid oxidation		20	21	20	21	20	20
	Q3URE1	Malonate--CoA ligase ACSF3, mitochondrial	ACSF3_MOUSE	Acsf3	3380	3171	2880	3182	2904	3009		3143.67	3031.67		MitoCarta3.0	APEX_matrix, targetP signal+, Rickettsial homolog, mito protein domain, coexpression+, MS/MS++	Matrix	Metabolism > Lipid metabolism > Type II fatty acid synthesis		13	12	12	13	13	12
	P41216	Long-chain-fatty-acid--CoA ligase 1	ACSL1_MOUSE	Acsl1	986	1056	854	777	872	811		965.333	820		MitoCarta3.0	yeast mito homolog, Rickettsial homolog, mito protein domain, coexpression	MOM	Metabolism > Lipid metabolism > Fatty acid oxidation		8	8	7	8	8	7
	Q9CZW4	Long-chain-fatty-acid--CoA ligase 3	ACSL3_MOUSE	Acsl3	1890	1924	1894	982	1443	1595		1902.67	1340			Rickettsial homolog, mito protein domain				14	14	13	12	12	14
	Q9QUJ7;Q9QUJ7-2	Long-chain-fatty-acid--CoA ligase 4;Isoform Short of Long-chain-fatty-acid--CoA ligase 4	ACSL4_MOUSE	Acsl4	33851	29741	32603	17122	29280	26948		32065	24450		mito-interacting	GFP, Rickettsial homolog, mito protein domain				33	33	32	30	33	33
	Q8JZR0	Long-chain-fatty-acid--CoA ligase 5	ACSL5_MOUSE	Acsl5	46867	46840	45976	35927	42402	41142		46561	39823.7			yeast mito homolog, Rickettsial homolog, mito protein domain, induction				30	29	28	29	28	28
	Q99NB1	Acetyl-coenzyme A synthetase 2-like, mitochondrial	ACS2L_MOUSE	Acss1	6986	6653	7051	6713	6918	6809		6896.67	6813.33		MitoCarta3.0	literature, APEX_matrix, targetP signal, mito protein domain, MS/MS++	MIM	Metabolism > Lipid metabolism > Fatty acid oxidation		21	21	21	20	20	21
	Q9QXG4	Acetyl-coenzyme A synthetase, cytoplasmic	ACSA_MOUSE	Acss2	2095	2119	2222	1487	2059	1954		2145.33	1833.33			mito protein domain, induction, coexpression				6	6	6	6	6	6
	P68134	Actin, alpha skeletal muscle	ACTS_MOUSE	Acta1	186739	148599	162395	110084	212267	195803		165911	172718			MS/MS				2	2	2	2	2	2
	P60710	Actin, cytoplasmic 1	ACTB_MOUSE	Actb	13893981	13280519	12947838	9953188	12652719	12301256		1.33741e+07	11635721							19	18	18	18	19	18
	Q8BFZ3	Beta-actin-like protein 2	ACTBL_MOUSE	Actbl2	183453	145592	157502	109542	169750	130330		162182	136541							8	8	8	8	8	8
	P68033	Actin, alpha cardiac muscle 1	ACTC_MOUSE	Actc1	43480341	43446932	41915400	32185630	41999494	38182015		4.29476e+07	37455713			coexpression				34	35	34	34	34	35
	P63260	Actin, cytoplasmic 2	ACTG_MOUSE	Actg1	1082231	940265	805398	615196	942950	775839		942631	777995							2	2	2	2	2	2
	Q9Z2N8	Actin-like protein 6A	ACL6A_MOUSE	Actl6a	81318	80337	74465	71262	73724	72095		78706.7	72360.3							20	19	19	19	18	19
	Q7TPR4	Alpha-actinin-1	ACTN1_MOUSE	Actn1	173252	169986	161807	133186	137613	146078		168348	138959			mito protein domain				57	57	55	58	54	56
	O88990	Alpha-actinin-3	ACTN3_MOUSE	Actn3	3383	2380	2790	2080	1211	1064		2851	1451.67							2	2	2	2	1	1
	P57780	Alpha-actinin-4	ACTN4_MOUSE	Actn4	187370	190263	184765	139824	186485	169136		187466	165148			mito protein domain				48	49	48	46	47	49
	Q9QZB7	Actin-related protein 10	ARP10_MOUSE	Actr10	12970	11531	10471	8107	10391	9262		11657.3	9253.33							15	17	16	17	15	16
	P61164	Alpha-centractin	ACTZ_MOUSE	Actr1a	42788	41929	37221	31462	35943	39042		40646	35482.3							9	9	9	8	9	8
	Q8R5C5	Beta-centractin	ACTY_MOUSE	Actr1b	50846	46058	44925	33951	42552	40543		47276.3	39015.3							15	15	15	15	15	15
	P61161	Actin-related protein 2	ARP2_MOUSE	Actr2	557684	556747	550642	384716	457895	475521		555024	439377			yeast mito homolog				18	19	19	19	18	18
	Q99JY9	Actin-related protein 3	ARP3_MOUSE	Actr3	1032555	997125	995243	641855	884213	787075		1.00831e+06	771048							26	24	25	24	24	25
	Q80US4	Actin-related protein 5	ARP5_MOUSE	Actr5	8724	9587	3584	4732	9471	6106		7298.33	6769.67							12	13	12	13	13	13
	Q9D864	Actin-related protein 6	ARP6_MOUSE	Actr6	1223	950	1004	938	1075	950		1059	987.667			induction				3	3	3	3	3	3
	Q8R2S9	Actin-related protein 8	ARP8_MOUSE	Actr8	1493	1420	1398	1242	1256	1247		1437	1248.33							11	10	10	10	11	10
	Q99JW2	Aminoacylase-1	ACY1_MOUSE	Acy1	4049	4299	4325	3249	3661	3570		4224.33	3493.33			Rickettsial homolog				7	8	8	8	8	8
	P56376	Acylphosphatase-1	ACYP1_MOUSE	Acyp1	60976	56652	58486	52506	48715	55204		58704.7	52141.7			MS/MS++				7	7	7	7	6	7
	P03958	Adenosine deaminase	ADA_MOUSE	Ada	30309	30927	28892	18647	24749	24945		30042.7	22780.3			MS/MS				19	19	19	19	19	19
	O35598	Disintegrin and metalloproteinase domain-containing protein 10	ADA10_MOUSE	Adam10	7826	7959	7855	6398	7273	7559		7880	7076.67							21	22	21	20	21	21
	Q9Z0F8;Q9Z0F8-2	Disintegrin and metalloproteinase domain-containing protein 17;Isoform Short of Disintegrin and metalloproteinase domain-containing protein 17	ADA17_MOUSE	Adam17	576	531	624	402	550	549		577	500.333							6	6	7	7	7	7
	O35674	Disintegrin and metalloproteinase domain-containing protein 19	ADA19_MOUSE	Adam19	879	821	850	462	752	673		850	629							11	10	11	10	10	10
	Q05910	Disintegrin and metalloproteinase domain-containing protein 8	ADAM8_MOUSE	Adam8	698	434	277	108	624	259		469.667	330.333							6	6	6	2	5	4
	E9PY16	ArfGAP with dual PH domains 1	E9PY16_MOUSE	Adap1	7067	6608	6354	6197	5937	5843		6676.33	5992.33			mito protein domain				9	9	9	9	8	9
	Q99MU3-2	Isoform 2 of Double-stranded RNA-specific adenosine deaminase	DSRAD_MOUSE	Adar	4490	4504	4452	3107	4100	3924		4482	3710.33			mito protein domain				24	22	23	22	24	24
	Q9JHI2;Q9JHI2-2;Q9JHI2-3	tRNA-specific adenosine deaminase 1;Isoform 2 of tRNA-specific adenosine deaminase 1;Isoform 3 of tRNA-specific adenosine deaminase 1	ADAT1_MOUSE	Adat1	605	567	565	516	596	534		579	548.667							4	4	4	4	4	4
	Q6P6J0	tRNA-specific adenosine deaminase 2	ADAT2_MOUSE	Adat2	99635	78901	77566	1821	82774	72381		85367.3	52325.3			Rickettsial homolog				3	3	3	3	3	3
	Q9D0L4	AarF domain-containing protein kinase 1	ADCK1_MOUSE	Adck1	1133	1065	1192	808	873	865		1130	848.667		MitoCarta3.0	yeast mito homolog+, Rickettsial homolog, mito protein domain, MS/MS	unknown			7	7	7	7	7	7
	Q80V03;Q80V03-2	Uncharacterized aarF domain-containing protein kinase 5;Isoform 2 of Uncharacterized aarF domain-containing protein kinase 5	ADCK5_MOUSE	Adck5	68	68	51	52	73	46		62.3333	57		MitoCarta3.0	targetP signal, yeast mito homolog+, Rickettsial homolog, mito protein domain, induction, coexpression, MS/MS	unknown			2	2	2	2	1	2
	Q8VHH7	Adenylate cyclase type 3	ADCY3_MOUSE	Adcy3	106	70	58	57	95	60		78	70.6667			mito protein domain, coexpression				2	3	3	3	2	3
	P51829	Adenylate cyclase type 7	ADCY7_MOUSE	Adcy7	2197	1856	1884	1175	1756	1763		1979	1564.67			mito protein domain				13	13	13	13	13	13
	Q9QYC0	Alpha-adducin	ADDA_MOUSE	Add1	37739	37959	39437	33145	35916	37205		38378.3	35422			Rickettsial homolog				31	31	30	32	29	31
	Q9QYB5-2	Isoform 1 of Gamma-adducin	ADDG_MOUSE	Add3	36484	36275	35723	33242	35274	36152		36160.7	34889.3			Rickettsial homolog				31	31	28	32	28	31
	Q9Z0M6;Q9Z0M6-3	Adhesion G protein-coupled receptor E5;Isoform 3 of Adhesion G protein-coupled receptor E5	AGRE5_MOUSE	Adgre5	16800	17543	17367	13749	13873	14065		17236.7	13895.7							19	18	19	19	19	19
	P28474	Alcohol dehydrogenase class-3	ADHX_MOUSE	Adh5	154190	141973	146524	122477	141428	143135		147562	135680			yeast mito homolog, mito protein domain, coexpression				23	23	22	23	23	22
	Q99JT9	1,2-dihydroxy-3-keto-5-methylthiopentene dioxygenase	MTND_MOUSE	Adi1	9111	8676	7864	7624	8586	7232		8550.33	7814							5	5	5	5	5	5
	P55264	Adenosine kinase	ADK_MOUSE	Adk	34873	30373	31275	34297	32796	33182		32173.7	33425			coexpression				18	18	18	18	18	18
	Q9Z103	Activity-dependent neuroprotector homeobox protein	ADNP_MOUSE	Adnp	11017	11052	10798	9932	11057	10240		10955.7	10409.7							35	36	35	36	35	35
	Q8CHC8	Activity-dependent neuroprotector homeobox protein 2	ADNP2_MOUSE	Adnp2	219	225	205	201	203	181		216.333	195							2	2	2	2	2	2
	Q6PDY2	2-aminoethanethiol dioxygenase	AEDO_MOUSE	Ado	6440	8093	7800	6682	7785	7058		7444.33	7175			targetP signal, MS/MS				7	7	7	7	7	7
	Q8VDL4;Q8VDL4-3	ADP-dependent glucokinase;Isoform 3 of ADP-dependent glucokinase	ADPGK_MOUSE	Adpgk	10789	11835	11424	10547	10007	10694		11349.3	10416							16	16	16	16	15	16
	P54923	[Protein ADP-ribosylarginine] hydrolase	ADPRH_MOUSE	Adprh	52525	55934	53946	52988	50259	53017		54135	52088			mito protein domain				16	16	16	15	15	15
	Q99KS6;Q99KS6-2	Manganese-dependent ADP-ribose/CDP-alcohol diphosphatase;Isoform 2 of Manganese-dependent ADP-ribose/CDP-alcohol diphosphatase	ADPRM_MOUSE	Adprm	711	547	557	324	468	460		605	417.333							3	3	3	3	3	3
	Q8CG72	ADP-ribose glycohydrolase ARH3	ADPRS_MOUSE	Adprs	10205	10808	10921	13026	10534	10381		10644.7	11313.7			targetP signal, mito protein domain				8	8	8	8	8	8
	Q9JKV1	Proteasomal ubiquitin receptor ADRM1	ADRM1_MOUSE	Adrm1	43937	46430	46318	37905	44502	42886		45561.7	41764.3							11	11	10	10	10	11
	P54822	Adenylosuccinate lyase	PUR8_MOUSE	Adsl	93433	89719	85469	81002	82292	83596		89540.3	82296.7			Rickettsial homolog, mito protein domain, induction, coexpression				28	29	27	28	28	28
	P28650;P28650-2	Adenylosuccinate synthetase isozyme 1;Isoform 2 of Adenylosuccinate synthetase isozyme 1	PURA1_MOUSE	Adss1	382	254	510	133	456	223		382	270.667			induction				2	2	2	2	2	2
	P46664	Adenylosuccinate synthetase isozyme 2	PURA2_MOUSE	Adss2	115035	121129	126467	98211	117328	115340		120877	110293			induction				26	25	25	25	25	25
	Q9Z248;Q9Z248-2	Zinc finger protein AEBP2;Isoform 2 of Zinc finger protein AEBP2	AEBP2_MOUSE	Aebp2	15278	16404	16666	12375	13488	13237		16116	13033.3							12	12	12	11	11	11
	Q9CZI9	Apoptosis-enhancing nuclease	AEN_MOUSE	Aen	2004	1528	1883	1197	1612	1600		1805	1469.67			Rickettsial homolog, mito protein domain				6	4	6	4	6	5
	Q9QZQ1;Q9QZQ1-2	Afadin;Isoform 1 of Afadin	AFAD_MOUSE	Afdn	104	69	66	234	65	171		79.6667	156.667			mito protein domain				3	3	3	3	3	3
	Q920A7	AFG3-like protein 1	AFG31_MOUSE	Afg3l1	4396	4133	3978	3141	3909	3666		4169	3572		MitoCarta3.0	literature, targetP signal, yeast mito homolog, Rickettsial homolog, mito protein domain+, coexpression, MS/MS+	MIM	Protein import, sorting and homeostasis > Protein homeostasis > Proteases		15	15	15	15	15	15
	Q8JZQ2	AFG3-like protein 2	AFG32_MOUSE	Afg3l2	22793	28029	22468	19791	21527	20116		24430	20478		MitoCarta3.0	literature, APEX_matrix, targetP signal, yeast mito homolog, Rickettsial homolog, mito protein domain+, induction, coexpression++, MS/MS++	MIM	Protein import, sorting and homeostasis > Protein homeostasis > Proteases		30	31	30	30	29	31
	Q8K4H1	Kynurenine formamidase	KFA_MOUSE	Afmid	915	732	748	521	744	690		798.333	651.667			mito protein domain, coexpression				2	2	2	2	2	2
	Q80WT5;Q80WT5-2	Aftiphilin;Isoform 2 of Aftiphilin	AFTIN_MOUSE	Aftph	1439	6904	6300	5397	5806	5452		4881	5551.67							14	15	15	14	14	14
	Q64191	N(4)-(beta-N-acetylglucosaminyl)-L-asparaginase	ASPG_MOUSE	Aga	603	1585	1219	1848	1334	1364		1135.67	1515.33							2	4	3	4	3	3
	Q3UHD9;Q3UHD9-2	Arf-GAP with GTPase, ANK repeat and PH domain-containing protein 2;Isoform 2 of Arf-GAP with GTPase, ANK repeat and PH domain-containing protein 2	AGAP2_MOUSE	Agap2	7957	8054	7177	6120	7251	6742		7729.33	6704.33			targetP signal, mito protein domain				17	17	16	17	16	17
	Q8VHH5	Arf-GAP with GTPase, ANK repeat and PH domain-containing protein 3	AGAP3_MOUSE	Agap3	521	530	527	404	508	486		526	466							6	6	6	6	6	6
	Q8K2K6;Q8K2K6-1;Q8K2K6-3	Arf-GAP domain and FG repeat-containing protein 1;Isoform 1 of Arf-GAP domain and FG repeat-containing protein 1;Isoform 3 of Arf-GAP domain and FG repeat-containing protein 1	AGFG1_MOUSE	Agfg1	22035	20439	22140	16481	20972	21001		21538	19484.7							14	14	14	14	14	14
	Q80WC7;Q80WC7-2	Arf-GAP domain and FG repeat-containing protein 2;Isoform 2 of Arf-GAP domain and FG repeat-containing protein 2	AGFG2_MOUSE	Agfg2	6243	5928	6268	4145	5958	5444		6146.33	5182.33							9	9	9	9	9	9
	Q7TN31	Angiogenic factor with G patch and FHA domains 1	AGGF1_MOUSE	Aggf1	244	186	228	159	237	214		219.333	203.333			mito protein domain, induction				2	2	2	2	2	2
	Q9ESW4	Acylglycerol kinase, mitochondrial	AGK_MOUSE	Agk	20637	18296	17422	17615	18359	18679		18785	18217.7		MitoCarta3.0	literature, APEX_IMS, mito protein domain	MIM	Protein import, sorting and homeostasis > Protein import and sorting > TIM22 carrier pathway | Metabolism > Lipid metabolism > Phospholipid metabolism		15	15	15	15	15	14
	F8VPN4	Amylo-1,6-glucosidase, 4-alpha-glucanotransferase	F8VPN4_MOUSE	Agl	263	184	168	142	204	188		205	178			yeast mito homolog, mito protein domain, induction				7	7	6	7	6	7
	Q8CJG1	Protein argonaute-1	AGO1_MOUSE	Ago1	146	198	175	199	159	180		173	179.333							1	2	2	2	2	2
	Q8CJG0	Protein argonaute-2	AGO2_MOUSE	Ago2	23616	19963	18942	19945	18247	19243		20840.3	19145							38	36	36	37	37	37
	O35083	1-acyl-sn-glycerol-3-phosphate acyltransferase alpha	PLCA_MOUSE	Agpat1	3400	3485	3214	2958	3002	3467		3366.33	3142.33			Rickettsial homolog, mito protein domain				4	4	4	4	4	4
	Q9D517	1-acyl-sn-glycerol-3-phosphate acyltransferase gamma	PLCC_MOUSE	Agpat3	18987	19525	19282	15518	18330	17606		19264.7	17151.3			mito protein domain, induction, coexpression				16	16	16	16	15	16
	Q8K4X7	1-acyl-sn-glycerol-3-phosphate acyltransferase delta	PLCD_MOUSE	Agpat4	2489	8800	9580	7426	8893	1944		6956.33	6087.67		MitoCarta3.0	literature,mito protein domain, induction	MOM	Metabolism > Lipid metabolism > Cardiolipin synthesis | Metabolism > Lipid metabolism > Phospholipid metabolism		6	6	6	6	6	6
	Q9D1E8	1-acyl-sn-glycerol-3-phosphate acyltransferase epsilon	PLCE_MOUSE	Agpat5	2154	2379	2134	2224	1658	1972		2222.33	1951.33		MitoCarta3.0	literature, mito protein domain, induction, MS/MS	MOM	Metabolism > Lipid metabolism > Cardiolipin synthesis | Metabolism > Lipid metabolism > Phospholipid metabolism		4	5	5	5	5	5
	Q8C0I1	Alkyldihydroxyacetonephosphate synthase, peroxisomal	ADAS_MOUSE	Agps	27591	27352	27691	17861	25128	24405		27544.7	22464.7			yeast mito homolog+, mito protein domain				27	29	28	27	27	29
	Q8CJF7	Protein ELYS	ELYS_MOUSE	Ahctf1	6528	6242	6133	5866	6271	6149		6301	6095.33							55	59	54	61	54	56
	P50247	Adenosylhomocysteinase	SAHH_MOUSE	Ahcy	266461	261532	260487	248560	247929	249308		262827	248599			mito protein domain+				29	28	27	27	28	28
	Q80SW1	S-adenosylhomocysteine hydrolase-like protein 1	SAHH2_MOUSE	Ahcyl1	3891	2008	2621	1596	3294	3302		2840	2730.67		MitoCarta3.0	mito protein domain+, induction	MOM	Mitochondrial dynamics and surveillance > Organelle contact sites		6	6	6	6	6	6
	Q68FL4	Putative adenosylhomocysteinase 3	SAHH3_MOUSE	Ahcyl2	18896	18064	17340	16246	16603	17092		18100	16647			mito protein domain				18	17	17	17	17	17
	Q6PAL7	AT-hook DNA-binding motif-containing protein 1	AHDC1_MOUSE	Ahdc1	95	97	102	84	119	100		98	101							3	3	3	3	3	3
	E9Q616	AHNAK nucleoprotein (desmoyokin)	E9Q616_MOUSE	Ahnak	108578	107687	109133	70564	111521	87900		108466	89995			mito protein domain				290	280	272	282	271	276
	Q8BK64	Activator of 90 kDa heat shock protein ATPase homolog 1	AHSA1_MOUSE	Ahsa1	161440	151344	161478	128146	148486	149547		158087	142060							25	26	27	25	24	26
	Q8N9S3;Q8N9S3-2;Q8N9S3-3	Activator of 90 kDa heat shock protein ATPase homolog 2;Isoform 2 of Activator of 90 kDa heat shock protein ATPase homolog 2;Isoform 3 of Activator of 90 kDa heat shock protein ATPase homolog 2	AHSA2_MOUSE	Ahsa2	3346	3593	3789	2473	3287	3327		3576	3029							6	6	6	6	6	6
	Q8C4Q6	Axin interactor, dorsalization-associated protein	AIDA_MOUSE	Aida	7871	7295	6868	4476	6927	6273		7344.67	5892			targetP signal				6	6	6	6	6	6
	Q9Z0X1	Apoptosis-inducing factor 1, mitochondrial	AIFM1_MOUSE	Aifm1	37137	37800	36648	33810	34264	35397		37195	34490.3		MitoCarta3.0	literature, APEX_IMS, targetP signal, yeast mito homolog, mito protein domain, induction, coexpression++, MS/MS++	MIM	Protein import, sorting and homeostasis > Protein import and sorting > MIA40 | OXPHOS > Complex I > CI assembly factors | OXPHOS > OXPHOS assembly factors | Mitochondrial dynamics and surveillance > Apoptosis		26	26	26	26	26	26
	Q91VJ1	Interferon-inducible protein AIM2	AIM2_MOUSE	Aim2	5727	4632	3523	2146	3682	3045		4627.33	2957.67							14	13	12	11	12	11
	P31230	Aminoacyl tRNA synthase complex-interacting multifunctional protein 1	AIMP1_MOUSE	Aimp1	124334	127838	127600	102058	117262	117408		126591	112243							20	20	20	21	20	20
	Q8R010	Aminoacyl tRNA synthase complex-interacting multifunctional protein 2	AIMP2_MOUSE	Aimp2	91115	92239	85141	67890	76212	75389		89498.3	73163.7			mito protein domain				14	13	14	14	14	13
	O08915	AH receptor-interacting protein	AIP_MOUSE	Aip	126255	125957	126743	97307	114805	114552		126318	108888			yeast mito homolog+, mito protein domain				15	15	14	15	15	15
	Q9WTP6;Q9WTP6-2	Adenylate kinase 2, mitochondrial;Isoform 2 of Adenylate kinase 2, mitochondrial	KAD2_MOUSE	Ak2	99360	98229	98671	108564	99763	102269		98753.3	103532		MitoCarta3.0	literature, APEX_IMS, yeast mito homolog, Rickettsial homolog, mito protein domain, coexpression+, MS/MS++	IMS	Metabolism > Nucleotide metabolism > Nucleotide synthesis and processing		13	13	14	14	13	13
	Q9WTP7	GTP:AMP phosphotransferase AK3, mitochondrial	KAD3_MOUSE	Ak3	73319	78499	76871	69386	58848	65653		76229.7	64629		MitoCarta3.0	literature, APEX_matrix, targetP signal, yeast mito homolog, Rickettsial homolog, mito protein domain, induction, coexpression, MS/MS++	Matrix	Metabolism > Nucleotide metabolism > Nucleotide synthesis and processing		14	14	14	14	14	14
	Q9WUR9	Adenylate kinase 4, mitochondrial	KAD4_MOUSE	Ak4	2758	2123	2986	1781	3137	2459		2622.33	2459		MitoCarta3.0	APEX_matrix, yeast mito homolog++, Rickettsial homolog, mito protein domain, MS/MS++	Matrix	Metabolism > Nucleotide metabolism > Nucleotide synthesis and processing		5	5	5	5	5	5
	Q8VCP8	Adenylate kinase isoenzyme 6	KAD6_MOUSE	Ak6	4639	2761	1265	644	3641	3176		2888.33	2487			Rickettsial homolog, mito protein domain				4	3	3	3	5	4
	O08715;O08715-4	A-kinase anchor protein 1, mitochondrial;Isoform 4 of A-kinase anchor protein 1, mitochondrial	AKAP1_MOUSE	Akap1	1033	545	896	686	987	797		824.667	823.333		MitoCarta3.0	literature, mito protein domain, induction, coexpression++, MS/MS+	MOM	Signaling > cAMP-PKA signaling		7	7	8	6	6	5
	O88845	A-kinase anchor protein 10, mitochondrial	AKA10_MOUSE	Akap10	1456	1986	1596	1017	1356	1316		1679.33	1229.67		MitoCarta3.0	literature, mito protein domain	MOM	Signaling > cAMP-PKA signaling		9	9	8	8	8	9
	E9Q774;E9Q777	A kinase (PRKA) anchor protein 11	E9Q774_MOUSE;E9Q777_MOUSE	Akap11	222	157	176	98	208	132		185	146							5	5	5	5	5	5
	E9Q394-2	Isoform 2 of A-kinase anchor protein 13	AKP13_MOUSE	Akap13	6500	6811	6515	6034	6270	6216		6608.67	6173.33			mito protein domain				63	64	62	60	59	60
	Q9DBR0	A-kinase anchor protein 8	AKAP8_MOUSE	Akap8	13116	13363	13175	11779	13004	12491		13218	12424.7							21	21	22	22	21	22
	Q9R0L7	A-kinase anchor protein 8-like	AKP8L_MOUSE	Akap8l	1479	1455	1307	1432	1346	1305		1413.67	1361							6	6	6	6	6	6
	Q80VW7	Microtubule organization protein AKNA	AKNA_MOUSE	Akna	5051	5044	5242	3710	4989	4551		5112.33	4416.67							34	34	35	35	34	35
	Q9JII6	Aldo-keto reductase family 1 member A1	AK1A1_MOUSE	Akr1a1	85625	83042	78811	72985	78898	75176		82492.7	75686.3							21	22	22	22	20	21
	P45376	Aldo-keto reductase family 1 member B1	ALDR_MOUSE	Akr1b1	357901	358696	351619	304118	339097	326207		356072	323141							21	20	21	20	20	21
	G5E895	Aldo-keto reductase family 1, member B10 (aldose reductase)	G5E895_MOUSE	Akr1b10	8522	9423	8481	11721	7485	12899		8808.67	10701.7		MitoCarta3.0	induction, coexpression, MS/MS++	unknown	Metabolism > Vitamin metabolism > Vitamin A metabolism | Metabolism > Detoxification > Xenobiotic metabolism		11	11	11	10	10	10
	Q8VC28	Aldo-keto reductase family 1 member C13	AK1CD_MOUSE	Akr1c13	23753	21546	22329	21784	23975	22449		22542.7	22736							16	18	18	18	17	18
	Q9DCT1	1,5-anhydro-D-fructose reductase	AKCL2_MOUSE	Akr1e2	1883	2074	1945	3403	2353	2186		1967.33	2647.33			coexpression				5	5	5	5	5	5
	Q8CG76	Aflatoxin B1 aldehyde reductase member 2	ARK72_MOUSE	Akr7a2	6571	7075	6625	6043	6029	6228		6757	6100		MitoCarta3.0	APEX_matrix, targetP signal+, coexpression, MS/MS++	Matrix	Metabolism > Amino acid metabolism > GABA metabolism | Metabolism > Detoxification > Xenobiotic metabolism		10	10	10	10	10	10
	P31750	RAC-alpha serine/threonine-protein kinase	AKT1_MOUSE	Akt1	56116	55990	54983	40314	47333	44984		55696.3	44210.3			mito protein domain				22	22	21	21	22	22
	Q9D1F4	Proline-rich AKT1 substrate 1	AKTS1_MOUSE	Akt1s1	1085	1167	867	1007	1048	896		1039.67	983.667			coexpression				3	3	3	3	3	3
	Q60823	RAC-beta serine/threonine-protein kinase	AKT2_MOUSE	Akt2	16223	15736	15535	11197	14068	13694		15831.3	12986.3			mito protein domain, coexpression				17	17	17	17	16	17
	Q64362	AKT-interacting protein	AKTIP_MOUSE	Aktip	310	168	161	137	211	161		213	169.667							2	2	2	2	2	2
	P10518	Delta-aminolevulinic acid dehydratase	HEM2_MOUSE	Alad	39703	30761	29407	16712	25754	24235		33290.3	22233.7			Rickettsial homolog, coexpression				14	14	14	14	14	14
	P07724	Albumin	ALBU_MOUSE	Alb	47785	77203	50485	51812	76193	44254		58491	57419.7							3	3	3	3	3	3
	Q61490	CD166 antigen	CD166_MOUSE	Alcam	4179	1774	4252	2680	3455	3741		3401.67	3292							11	8	12	11	9	11
	Q571I9	Aldehyde dehydrogenase family 16 member A1	A16A1_MOUSE	Aldh16a1	14079	14651	14438	11668	12962	12721		14389.3	12450.3			yeast mito homolog, mito protein domain, coexpression				16	16	16	16	16	16
	Q9Z110	Delta-1-pyrroline-5-carboxylate synthase	P5CS_MOUSE	Aldh18a1	68783	73043	70602	63071	64418	65320		70809.3	64269.7		MitoCarta3.0	literature, targetP signal+, Rickettsial homolog, mito protein domain, coexpression, MS/MS++	Matrix	Metabolism > Amino acid metabolism > Proline metabolism		47	47	45	48	46	47
	Q9CZS1	Aldehyde dehydrogenase X, mitochondrial	AL1B1_MOUSE	Aldh1b1	1151	1318	1191	1460	1095	1148		1220	1234.33		MitoCarta3.0	literature, APEX_matrix, targetP signal, yeast mito homolog+, mito protein domain, MS/MS++	Matrix	Metabolism > Detoxification > Xenobiotic metabolism		6	7	7	7	6	7
	P47738	Aldehyde dehydrogenase, mitochondrial	ALDH2_MOUSE	Aldh2	2384	2321	2445	3227	2714	1855		2383.33	2598.67		MitoCarta3.0	literature, APEX_matrix, targetP signal, yeast mito homolog+, mito protein domain, coexpression, MS/MS++	Matrix	Metabolism > Detoxification > Xenobiotic metabolism		5	6	5	6	6	5
	P47740	Aldehyde dehydrogenase family 3 member A2	AL3A2_MOUSE	Aldh3a2	13895	15422	13454	12389	11955	12847		14257	12397		MitoCarta3.0	targetP signal+, yeast mito homolog, mito protein domain, coexpression	Membrane	Metabolism > Detoxification > ROS and glutathione metabolism		13	13	13	13	13	13
	Q8CHT0	Delta-1-pyrroline-5-carboxylate dehydrogenase, mitochondrial	AL4A1_MOUSE	Aldh4a1	3405	3657	3473	2810	3051	2866		3511.67	2909		MitoCarta3.0	literature, APEX_matrix, targetP signal+, yeast mito homolog++, mito protein domain, coexpression, MS/MS++	Matrix	Metabolism > Amino acid metabolism > Proline metabolism | Metabolism > Amino acid metabolism > Glyoxylate metabolism		8	8	8	8	8	7
	Q9DBF1-2	Isoform 2 of Alpha-aminoadipic semialdehyde dehydrogenase	AL7A1_MOUSE	Aldh7a1	3593	3232	3145	2586	3364	2760		3323.33	2903.33		MitoCarta3.0	literature, APEX_matrix, targetP signal, yeast mito homolog, mito protein domain, MS/MS++	Matrix	Metabolism > Amino acid metabolism > Lysine metabolism | Metabolism > Amino acid metabolism > Glycine metabolism | Metabolism > Vitamin metabolism > Choline and betaine metabolism | Metabolism > Vitamin metabolism > Folate and 1-C metabolism | Metabolism > Detoxification > ROS and glutathione metabolism		12	12	12	12	12	11
	Q9JLJ2	4-trimethylaminobutyraldehyde dehydrogenase	AL9A1_MOUSE	Aldh9a1	104983	106294	105488	87998	98582	98504		105588	95028		MitoCarta3.0	APEX_matrix, targetP signal, yeast mito homolog+, mito protein domain, coexpression, MS/MS++	Matrix	Metabolism > Amino acid metabolism > GABA metabolism | Metabolism > Detoxification > ROS and glutathione metabolism		32	31	32	31	32	32
	P05064	Fructose-bisphosphate aldolase A	ALDOA_MOUSE	Aldoa	2707194	2269586	2740878	1334098	2534310	2198802		2.57255e+06	2.0224e+06							44	44	44	45	43	45
	P05063	Fructose-bisphosphate aldolase C	ALDOC_MOUSE	Aldoc	123524	94136	110385	50151	102153	87012		109348	79772							18	18	18	16	18	18
	Q921Q3;Q921Q3-2	Chitobiosyldiphosphodolichol beta-mannosyltransferase;Isoform 2 of Chitobiosyldiphosphodolichol beta-mannosyltransferase	ALG1_MOUSE	Alg1	3493	2827	2344	1991	5658	3092		2888	3580.33							8	8	8	8	8	8
	Q3UGP8	Putative Dol-P-Glc:Glc(2)Man(9)GlcNAc(2)-PP-Dol alpha-1,2-glucosyltransferase	AG10B_MOUSE	Alg10b	431	433	336	314	265	321		400	300							2	2	2	2	1	2
	Q3TZM9	GDP-Man:Man(3)GlcNAc(2)-PP-Dol alpha-1,2-mannosyltransferase	ALG11_MOUSE	Alg11	919	984	951	857	806	858		951.333	840.333							3	3	3	3	3	3
	Q9DBE8	Alpha-1,3/1,6-mannosyltransferase ALG2	ALG2_MOUSE	Alg2	3126	2593	2869	2669	2974	2778		2862.67	2807			targetP signal, Rickettsial homolog				9	10	10	10	9	10
	Q8K2A8	Dol-P-Man:Man(5)GlcNAc(2)-PP-Dol alpha-1,3-mannosyltransferase	ALG3_MOUSE	Alg3	1626	1620	1492	1214	1373	1341		1579.33	1309.33			targetP signal, coexpression				3	3	3	3	3	3
	Q9DB25	Dolichyl-phosphate beta-glucosyltransferase	ALG5_MOUSE	Alg5	21759	22761	20819	16465	17360	18268		21779.7	17364.3			Rickettsial homolog				10	11	11	11	10	11
	Q6P8H8	Probable dolichyl pyrophosphate Glc1Man9GlcNAc2 alpha-1,3-glucosyltransferase	ALG8_MOUSE	Alg8	3697	4337	4265	3253	3298	3628		4099.67	3393							4	4	4	3	3	4
	Q8VDI9	Alpha-1,2-mannosyltransferase ALG9	ALG9_MOUSE	Alg9	871	880	831	663	676	776		860.667	705			coexpression				5	6	6	6	5	5
	Q8K1E6	Alpha-ketoglutarate-dependent dioxygenase alkB homolog 3	ALKB3_MOUSE	Alkbh3	5516	5388	5194	4248	4682	5035		5366	4655			mito protein domain, induction, coexpression				8	8	8	8	8	8
	Q3TSG4	RNA demethylase ALKBH5	ALKB5_MOUSE	Alkbh5	12972	10640	12434	10723	13201	12448		12015.3	12124			mito protein domain				11	11	11	11	11	12
	Q8K2U2	Alpha-ketoglutarate-dependent dioxygenase alkB homolog 6	ALKB6_MOUSE	Alkbh6	1191	1002	1060	894	1323	1131		1084.33	1116			mito protein domain, induction				2	1	1	1	2	2
	Q80Y20;Q80Y20-2	Alkylated DNA repair protein alkB homolog 8;Isoform 2 of Alkylated DNA repair protein alkB homolog 8	ALKB8_MOUSE	Alkbh8	383	272	158	198	282	252		271	244			mito protein domain				2	2	1	2	2	2
	O08583	THO complex subunit 4	THOC4_MOUSE	Alyref	209606	194218	211345	196230	244799	215245		205056	218758			mito protein domain				10	11	11	10	10	11
	A2AH22;A2AH22-2;A2AH22-5;A2AH22-6;A2AH22-7	Activating molecule in BECN1-regulated autophagy protein 1;Isoform 2 of Activating molecule in BECN1-regulated autophagy protein 1;Isoform 5 of Activating molecule in BECN1-regulated autophagy protein 1;Isoform 6 of Activating molecule in BECN1-regulated autophagy protein 1;Isoform 7 of Activating molecule in BECN1-regulated autophagy protein 1	AMRA1_MOUSE	Ambra1	492	455	405	331	623	496		450.667	483.333			mito protein domain				10	10	9	10	10	10
	Q8JZV7	N-acetylglucosamine-6-phosphate deacetylase	NAGA_MOUSE	Amdhd2	10591	10800	10954	7709	10087	9600		10781.7	9132							10	10	10	10	10	10
	Q9R049-2	Isoform 2 of E3 ubiquitin-protein ligase AMFR	AMFR_MOUSE	Amfr	3208	2678	3106	1981	2970	2806		2997.33	2585.67			mito protein domain, coexpression				10	10	10	10	10	10
	Q8JZZ6	AMMECR1-like protein	AMERL_MOUSE	Ammecr1l	1159	1196	1064	909	1256	1111		1139.67	1092							3	3	3	3	3	3
	Q9DBT5	AMP deaminase 2	AMPD2_MOUSE	Ampd2	11031	21428	25926	9444	12462	23411		19461.7	15105.7			targetP signal				24	24	23	24	23	24
	P53995	Anaphase-promoting complex subunit 1	APC1_MOUSE	Anapc1	5808	5577	5501	4442	5313	4895		5628.67	4883.33							51	53	53	51	50	51
	Q9CPX9	Anaphase-promoting complex subunit 11	APC11_MOUSE	Anapc11	1189	1564	1461	1305	1533	1021		1404.67	1286.33							2	2	2	2	2	2
	Q8BZQ7	Anaphase-promoting complex subunit 2	ANC2_MOUSE	Anapc2	6863	6294	6210	5001	5646	5799		6455.67	5482							23	22	23	20	22	22
	Q91W96	Anaphase-promoting complex subunit 4	APC4_MOUSE	Anapc4	7314	6052	7604	6270	6807	7408		6990	6828.33							19	18	18	18	20	19
	Q8BTZ4	Anaphase-promoting complex subunit 5	APC5_MOUSE	Anapc5	10987	9133	9518	7412	9593	8952		9879.33	8652.33			mito protein domain, coexpression				24	25	25	26	24	24
	Q9WVM3	Anaphase-promoting complex subunit 7	APC7_MOUSE	Anapc7	7196	6755	5900	6198	6189	8084		6617	6823.67			mito protein domain				17	17	17	16	17	16
	Q8K1C0;Q8K1C0-2;Q8K1C0-3	Protein angel homolog 2;Isoform 2 of Protein angel homolog 2;Isoform 3 of Protein angel homolog 2	ANGE2_MOUSE	Angel2	4600	3724	3549	2875	3029	3192		3957.67	3032		MitoCarta3.0	APEX_matrix, mito protein domain, MS/MS	Matrix	Mitochondrial central dogma > mtRNA metabolism > mt-mRNA modifications		11	11	10	11	10	10
	Q810B6	Rabankyrin-5	ANFY1_MOUSE	Ankfy1	64951	62219	58503	9880	11590	19065		61891	13511.7			Rickettsial homolog, mito protein domain				40	40	40	39	40	39
	E9PUR0;E9Q1M6	Ankyrin repeat and KH domain-containing 1	E9PUR0_MOUSE;E9Q1M6_MOUSE	Ankhd1	5150	5282	5810	2708	5593	3731		5414	4010.67			Rickettsial homolog, mito protein domain				29	29	29	28	27	29
	Q6P1H6	Ankyrin repeat and LEM domain-containing protein 2	ANKL2_MOUSE	Ankle2	3543	3338	3478	2365	3465	3132		3453	2987.33							21	20	20	19	20	20
	Q3TPE9	Ankyrin repeat and MYND domain-containing protein 2	ANKY2_MOUSE	Ankmy2	4336	4131	3759	2845	3637	3449		4075.33	3310.33			Rickettsial homolog, mito protein domain				7	7	7	7	7	7
	Q99LW0	Ankyrin repeat domain-containing protein 10	ANR10_MOUSE	Ankrd10	2800	2416	2520	1971	2384	2475		2578.67	2276.67			Rickettsial homolog, mito protein domain				3	3	3	3	3	3
	E9Q4F7	Ankyrin repeat domain-containing protein 11	ANR11_MOUSE	Ankrd11	231	176	199	140	204	189		202	177.667			Rickettsial homolog, mito protein domain				7	7	7	7	7	7
	Q80UP5	Ankyrin repeat domain-containing protein 13A	AN13A_MOUSE	Ankrd13a	8739	8983	8883	5778	7844	7395		8868.33	7005.67			mito protein domain				16	16	16	15	15	17
	Q99NH0	Ankyrin repeat domain-containing protein 17	ANR17_MOUSE	Ankrd17	1902	1687	1761	1267	1742	1570		1783.33	1526.33			Rickettsial homolog, mito protein domain				31	30	29	28	30	29
	Q505D1	Serine/threonine-protein phosphatase 6 regulatory ankyrin repeat subunit A	ANR28_MOUSE	Ankrd28	2616	2252	2160	1819	2673	2361		2342.67	2284.33			Rickettsial homolog, mito protein domain				14	14	14	15	15	14
	B2RXR6	Serine/threonine-protein phosphatase 6 regulatory ankyrin repeat subunit B	ANR44_MOUSE	Ankrd44	52265	50979	49729	35261	44171	42127		50991	40519.7			Rickettsial homolog, mito protein domain				49	49	48	47	47	47
	Q8BTZ5	Ankyrin repeat domain-containing protein 46	ANR46_MOUSE	Ankrd46	1353	1360	1470	692	1801	1729		1394.33	1407.33			Rickettsial homolog, mito protein domain				1	2	2	2	1	2
	Q8VE42	Ankyrin repeat domain-containing protein 49	ANR49_MOUSE	Ankrd49	2279	1878	1788	1627	1556	1547		1981.67	1576.67			Rickettsial homolog, mito protein domain				3	3	3	3	3	3
	Q8BTI7	Serine/threonine-protein phosphatase 6 regulatory ankyrin repeat subunit C	ANR52_MOUSE	Ankrd52	2278	1781	1698	956	2134	1593		1919	1561			Rickettsial homolog, mito protein domain				17	18	18	17	18	19
	Q91WK7	Ankyrin repeat domain-containing protein 54	ANR54_MOUSE	Ankrd54	1917	1975	1562	1637	1604	1664		1818	1635			Rickettsial homolog, mito protein domain				2	2	2	2	2	2
	P59672;P59672-2	Ankyrin repeat and SAM domain-containing protein 1A;Isoform 2 of Ankyrin repeat and SAM domain-containing protein 1A	ANS1A_MOUSE	Anks1a	189	173	162	136	146	146		174.667	142.667			Rickettsial homolog, mito protein domain, coexpression				2	2	2	2	2	2
	Q80UU1	Ankyrin repeat and zinc finger domain-containing protein 1	ANKZ1_MOUSE	Ankzf1	2665	2106	1974	1663	1716	1898		2248.33	1759			yeast mito homolog, mito protein domain, induction				9	9	9	9	8	8
	Q8K298	Anillin	ANLN_MOUSE	Anln	3865	3418	3007	1899	5297	3191		3430	3462.33			mito protein domain				23	24	23	24	22	22
	Q8BH79;Q8BH79-2	Anoctamin-10;Isoform 2 of Anoctamin-10	ANO10_MOUSE	Ano10	1453	1301	1324	1032	1186	1229		1359.33	1149			coexpression				6	6	6	6	5	6
	Q6P9J9	Anoctamin-6	ANO6_MOUSE	Ano6	1134	1034	871	973	905	963		1013	947							6	6	5	6	6	6
	O35381	Acidic leucine-rich nuclear phosphoprotein 32 family member A	AN32A_MOUSE	Anp32a	545708	513638	517241	508110	521373	524223		525529	517902			mito protein domain				15	16	16	15	14	15
	Q9EST5;Q9EST5-2	Acidic leucine-rich nuclear phosphoprotein 32 family member B;Isoform 2 of Acidic leucine-rich nuclear phosphoprotein 32 family member B	AN32B_MOUSE	Anp32b	568195	542011	569124	537840	571704	552893		559777	554146			mito protein domain, MS/MS				7	8	7	7	5	6
	P97822	Acidic leucine-rich nuclear phosphoprotein 32 family member E	AN32E_MOUSE	Anp32e	270680	220618	225866	200213	249965	233159		239055	227779			mito protein domain				11	11	10	11	11	11
	Q501J2	Adenine nucleotide translocase lysine N-methyltransferase	ANKMT_MOUSE	Antkmt	3234	2817	2958	2063	3225	2751		3003	2679.67		MitoCarta3.0	literature,coexpression, MS/MS	MIM	Metabolism > Nucleotide metabolism		6	6	6	6	6	7
	P10107	Annexin A1	ANXA1_MOUSE	Anxa1	33623	34082	35784	8276	33687	19429		34496.3	20464			MS/MS				26	28	28	22	27	27
	P97384	Annexin A11	ANX11_MOUSE	Anxa11	113962	111521	107889	80661	100203	96683		111124	92515.7							23	22	20	21	19	21
	P07356	Annexin A2	ANXA2_MOUSE	Anxa2	1490639	1232495	1366392	709500	1326952	1175971		1.36318e+06	1.07081e+06							38	38	37	38	35	37
	P97429	Annexin A4	ANXA4_MOUSE	Anxa4	74736	53835	65740	33527	89158	60547		64770.3	61077.3							18	19	20	17	19	19
	P48036	Annexin A5	ANXA5_MOUSE	Anxa5	273041	243478	242392	192397	216345	224132		252970	210958							25	25	24	25	22	24
	P14824	Annexin A6	ANXA6_MOUSE	Anxa6	1876657	1726561	1697803	1357893	1610147	1579377		1767007	1.51581e+06							67	67	66	66	65	67
	Q07076	Annexin A7	ANXA7_MOUSE	Anxa7	72833	69836	68488	53900	60742	60475		70385.7	58372.3							22	22	22	22	22	22
	O35643	AP-1 complex subunit beta-1	AP1B1_MOUSE	Ap1b1	76710	70036	72370	52730	65362	65715		73038.7	61269							48	49	48	48	47	48
	P22892	AP-1 complex subunit gamma-1	AP1G1_MOUSE	Ap1g1	27653	23005	23657	18447	21352	22157		24771.7	20652			targetP signal, coexpression				28	28	27	28	27	28
	O88512	AP-1 complex subunit gamma-like 2	AP1G2_MOUSE	Ap1g2	29961	32963	30643	26672	26950	27035		31189	26885.7							28	28	29	28	27	28
	P35585	AP-1 complex subunit mu-1	AP1M1_MOUSE	Ap1m1	82076	85628	80859	64797	70358	73965		82854.3	69706.7							22	23	22	23	22	22
	P61967	AP-1 complex subunit sigma-1A	AP1S1_MOUSE	Ap1s1	42634	43237	44909	38378	40084	42187		43593.3	40216.3			targetP signal				6	6	6	6	6	6
	Q9DB50	AP-1 complex subunit sigma-2	AP1S2_MOUSE	Ap1s2	8848	9106	9443	5469	6993	6517		9132.33	6326.33			targetP signal				2	2	2	2	2	2
	Q7TN05	AP-1 complex subunit sigma-3	AP1S3_MOUSE	Ap1s3	4676	4349	4193	2899	3634	3811		4406	3448			targetP signal				3	3	3	2	2	3
	P17426;P17426-2	AP-2 complex subunit alpha-1;Isoform B of AP-2 complex subunit alpha-1	AP2A1_MOUSE	Ap2a1	38199	37784	36825	28997	32726	33151		37602.7	31624.7							46	46	46	46	46	46
	P17427	AP-2 complex subunit alpha-2	AP2A2_MOUSE	Ap2a2	22758	22556	20826	15279	20252	20234		22046.7	18588.3							33	33	32	33	31	32
	Q9DBG3;Q9DBG3-2	AP-2 complex subunit beta;Isoform 2 of AP-2 complex subunit beta	AP2B1_MOUSE	Ap2b1	50852	46120	46696	32946	42262	40389		47889.3	38532.3							29	29	28	28	28	28
	P84091	AP-2 complex subunit mu	AP2M1_MOUSE	Ap2m1	60801	56310	55343	40949	53504	50673		57484.7	48375.3			induction				22	22	22	22	22	22
	P62743	AP-2 complex subunit sigma	AP2S1_MOUSE	Ap2s1	50441	40896	36583	24754	29029	30034		42640	27939							7	7	7	7	7	7
	Q9Z1T1	AP-3 complex subunit beta-1	AP3B1_MOUSE	Ap3b1	16255	20187	21077	11546	13946	18110		19173	14534			MS/MS				38	38	37	38	36	38
	O54774	AP-3 complex subunit delta-1	AP3D1_MOUSE	Ap3d1	14657	13383	13238	9802	11834	11823		13759.3	11153			MS/MS				39	39	39	38	39	39
	Q9JKC8	AP-3 complex subunit mu-1	AP3M1_MOUSE	Ap3m1	19923	14977	14718	10940	12889	13748		16539.3	12525.7			MS/MS				13	12	11	11	11	12
	Q9DCR2	AP-3 complex subunit sigma-1	AP3S1_MOUSE	Ap3s1	22517	22036	21488	15036	19239	19428		22013.7	17901							8	8	7	7	8	8
	Q9WV76	AP-4 complex subunit beta-1	AP4B1_MOUSE	Ap4b1	513	364	436	349	722	412		437.667	494.333							6	5	5	5	5	6
	Q80V94	AP-4 complex subunit epsilon-1	AP4E1_MOUSE	Ap4e1	445	407	375	275	479	352		409	368.667							5	5	6	5	6	6
	Q9JKC7	AP-4 complex subunit mu-1	AP4M1_MOUSE	Ap4m1	551	594	569	457	498	564		571.333	506.333							2	2	2	2	2	2
	Q9WVL1	AP-4 complex subunit sigma-1	AP4S1_MOUSE	Ap4s1	1855	1815	1777	1315	1515	1558		1815.67	1462.67			coexpression				1	2	2	2	2	2
	Q3TAP4	AP-5 complex subunit beta-1	AP5B1_MOUSE	Ap5b1	120	132	110	100	79	84		120.667	87.6667			targetP signal				2	2	2	2	2	2
	Q8BJ63	AP-5 complex subunit mu-1	AP5M1_MOUSE	Ap5m1	483	465	480	393	376	380		476	383			targetP signal, induction				2	2	2	2	2	2
	Q3U829	AP-5 complex subunit zeta-1	AP5Z1_MOUSE	Ap5z1	368	329	334	279	315	308		343.667	300.667							4	4	4	4	4	4
	O88879	Apoptotic protease-activating factor 1	APAF_MOUSE	Apaf1	11783	10712	10626	7419	9349	9539		11040.3	8769			mito protein domain				35	36	36	35	34	36
	Q8R5A3	Amyloid beta A4 precursor protein-binding family B member 1-interacting protein	AB1IP_MOUSE	Apbb1ip	22446	22365	19871	15315	17954	17948		21560.7	17072.3			mito protein domain				15	15	15	15	16	15
	Q8R146;Q8R146-2	Acylamino-acid-releasing enzyme;Isoform 2 of Acylamino-acid-releasing enzyme	APEH_MOUSE	Apeh	30669	29405	25308	22322	27722	26102		28460.7	25382			Rickettsial homolog, MS/MS				24	24	23	24	24	24
	P28352	DNA-(apurinic or apyrimidinic site) endonuclease	APEX1_MOUSE	Apex1	60412	56167	59356	63854	66535	58726		58645	63038.3		MitoCarta3.0	literature,Rickettsial homolog, mito protein domain	Matrix	Mitochondrial central dogma > mtDNA maintenance > mtDNA repair		18	18	17	18	18	18
	O35841	Apoptosis inhibitor 5	API5_MOUSE	Api5	127055	125083	121288	110301	124754	120251		124475	118435							29	27	25	28	26	25
	Q9WVQ5	Methylthioribulose-1-phosphate dehydratase	MTNB_MOUSE	Apip	27333	26487	24636	22683	22508	23215		26152	22802			induction				12	13	13	12	12	12
	Q9D7N9	Adipocyte plasma membrane-associated protein	APMAP_MOUSE	Apmap	35544	35204	35033	27378	31681	25654		35260.3	28237.7			coexpression				21	22	20	19	19	21
	Q00623	Apolipoprotein A-I	APOA1_MOUSE	Apoa1	19343	20719	15109	17951	17027	17474		18390.3	17484							2	2	2	2	2	2
	E9Q414	Apolipoprotein B-100	APOB_MOUSE	Apob	287	221	224	158	233	216		244	202.333							6	5	5	5	5	5
	Q99J72;Q99J72-4	DNA dC->dU-editing enzyme APOBEC-3;Isoform 4 of DNA dC->dU-editing enzyme APOBEC-3	ABEC3_MOUSE	Apobec3	80990	73625	72194	53012	66214	65591		75603	61605.7							24	24	24	24	24	24
	Q8VBT6	Apolipoprotein B receptor	APOBR_MOUSE	Apobr	5053	5736	5524	2005	5010	3951		5437.67	3655.33							30	31	31	30	29	30
	Q9DCZ4;Q9DCZ4-2;Q9DCZ4-3	MICOS complex subunit Mic26;Isoform 2 of MICOS complex subunit Mic26;Isoform 3 of MICOS complex subunit Mic26	MIC26_MOUSE	Apoo	15258	13608	13431	10717	12693	12539		14099	11983		MitoCarta3.0	literature, APEX_IMS, targetP signal, mito protein domain+, MS/MS++	MIM	Mitochondrial dynamics and surveillance > Cristae formation > MICOS complex		5	5	5	5	5	5
	Q78IK4	MICOS complex subunit Mic27	MIC27_MOUSE	Apool	38556	39694	34804	39025	35397	35275		37684.7	36565.7		MitoCarta3.0	literature, yeast mito homolog, mito protein domain+, induction, coexpression++, MS/MS++	MIM	Mitochondrial dynamics and surveillance > Cristae formation > MICOS complex		16	17	15	17	17	16
	Q9DAX9	Amyloid protein-binding protein 2	APBP2_MOUSE	Appbp2	37	34	28	10	13	26		33	16.3333			mito protein domain				2	1	2	1	1	2
	Q8K3H0	DCC-interacting protein 13-alpha	DP13A_MOUSE	Appl1	319254	277061	285051	261832	20735	13138		293789	98568.3							21	22	21	21	20	20
	Q8K3G9	DCC-interacting protein 13-beta	DP13B_MOUSE	Appl2	218	232	218	136	222	172		222.667	176.667							3	3	3	3	3	3
	P08030	Adenine phosphoribosyltransferase	APT_MOUSE	Aprt	209291	193104	190170	156423	163951	176441		197522	165605			MS/MS				12	12	11	12	11	12
	Q7TQC5;Q7TQC5-3	Aprataxin;Isoform 3 of Aprataxin	APTX_MOUSE	Aptx	961	744	1036	1070	1071	1052		913.667	1064.33			targetP signal, Rickettsial homolog, mito protein domain				3	4	4	4	4	4
	Q8CFQ3	RNA helicase aquarius	AQR_MOUSE	Aqr	16312	15034	15369	12310	13526	14225		15571.7	13353.7							49	50	51	49	51	51
	P04627	Serine/threonine-protein kinase A-Raf	ARAF_MOUSE	Araf	8343	7653	8007	6163	9069	7266		8001	7499.33			mito protein domain				14	14	14	13	14	14
	Q4LDD4;Q4LDD4-2	Arf-GAP with Rho-GAP domain, ANK repeat and PH domain-containing protein 1;Isoform 2 of Arf-GAP with Rho-GAP domain, ANK repeat and PH domain-containing protein 1	ARAP1_MOUSE	Arap1	11530	11096	11800	4200	9527	5814		11475.3	6513.67			mito protein domain				20	20	21	20	20	22
	Q8BZ05	Arf-GAP with Rho-GAP domain, ANK repeat and PH domain-containing protein 2	ARAP2_MOUSE	Arap2	400	342	300	382	307	316		347.333	335							11	11	10	11	11	11
	Q5XJY5	Coatomer subunit delta	COPD_MOUSE	Arcn1	101506	97649	98522	71635	87959	90663		99225.7	83419			targetP signal				37	36	35	37	35	36
	P84078	ADP-ribosylation factor 1	ARF1_MOUSE	Arf1	892706	748279	737429	542516	647362	668567		792805	619482			mito protein domain, induction, coexpression				15	14	14	15	13	12
	P61750	ADP-ribosylation factor 4	ARF4_MOUSE	Arf4	22931	20280	21414	15722	18994	18676		21541.7	17797.3			targetP signal, mito protein domain				5	5	4	5	4	5
	P84084	ADP-ribosylation factor 5	ARF5_MOUSE	Arf5	111751	109993	107743	77231	100224	99188		109829	92214.3		MitoCarta3.0	targetP signal, mito protein domain, coexpression, MS/MS	unknown			8	8	8	8	7	8
	P62331	ADP-ribosylation factor 6	ARF6_MOUSE	Arf6	152484	133891	133698	94135	130098	118682		140024	114305			mito protein domain				7	8	8	7	8	8
	Q9EPJ9	ADP-ribosylation factor GTPase-activating protein 1	ARFG1_MOUSE	Arfgap1	9012	8820	9056	6716	9294	8502		8962.67	8170.67							14	14	14	14	14	14
	Q99K28;Q99K28-2	ADP-ribosylation factor GTPase-activating protein 2;Isoform 2 of ADP-ribosylation factor GTPase-activating protein 2	ARFG2_MOUSE	Arfgap2	27477	25325	26521	19771	26216	23528		26441	23171.7							23	23	23	23	23	22
	Q9D8S3	ADP-ribosylation factor GTPase-activating protein 3	ARFG3_MOUSE	Arfgap3	631	507	591	348	651	539		576.333	512.667							5	5	5	4	5	5
	G3X9K3	Brefeldin A-inhibited guanine nucleotide-exchange protein 1	BIG1_MOUSE	Arfgef1	6336	4846	4343	3524	4372	4325		5175	4073.67			Rickettsial homolog				45	45	42	45	44	45
	A2A5R2	Brefeldin A-inhibited guanine nucleotide-exchange protein 2	BIG2_MOUSE	Arfgef2	2657	2518	2342	1848	2278	2084		2505.67	2070			Rickettsial homolog, induction				28	28	28	27	26	27
	A2RSX9	ADP-ribosylation factor interacting protein 1	A2RSX9_MOUSE	Arfip1	20131	19726	19093	15945	18291	17770		19650	17335.3							15	15	16	15	15	15
	Q8K221	Arfaptin-2	ARFP2_MOUSE	Arfip2	653	558	546	605	722	600		585.667	642.333							4	4	4	4	4	4
	Q8BXL7	ADP-ribosylation factor-related protein 1	ARFRP_MOUSE	Arfrp1	10658	10456	9030	6074	8164	7348		10048	7195.33			mito protein domain, induction				7	7	6	7	7	7
	Q3UL36	Arginine and glutamate-rich protein 1	ARGL1_MOUSE	Arglu1	5777	7738	7091	6496	7071	6197		6868.67	6588							4	4	4	4	4	4
	Q5FWK3	Rho GTPase-activating protein 1	RHG01_MOUSE	Arhgap1	86542	86455	86174	58053	67948	73602		86390.3	66534.3			yeast mito homolog, mito protein domain				24	24	24	24	23	24
	Q80Y19	Rho GTPase-activating protein 11A	RHGBA_MOUSE	Arhgap11a	1800	1560	1628	1189	1679	1443		1662.67	1437			yeast mito homolog, mito protein domain				12	12	12	12	12	12
	Q8C0D4	Rho GTPase-activating protein 12	RHG12_MOUSE	Arhgap12	585	590	537	460	543	542		570.667	515			yeast mito homolog, mito protein domain				4	4	4	4	4	4
	Q811M1	Rho GTPase-activating protein 15	RHG15_MOUSE	Arhgap15	17771	18428	17983	15914	16833	17364		18060.7	16703.7			yeast mito homolog, mito protein domain				16	16	16	16	17	17
	Q3UIA2;Q3UIA2-2;Q3UIA2-3;Q3UIA2-4	Rho GTPase-activating protein 17;Isoform 2 of Rho GTPase-activating protein 17;Isoform 3 of Rho GTPase-activating protein 17;Isoform 4 of Rho GTPase-activating protein 17	RHG17_MOUSE	Arhgap17	6843	6500	6638	5427	5682	5426		6660.33	5511.67			yeast mito homolog, mito protein domain				17	17	17	17	17	17
	Q8K0Q5	Rho GTPase-activating protein 18	RHG18_MOUSE	Arhgap18	13594	12661	12976	9150	10986	11143		13077	10426.3			yeast mito homolog, mito protein domain, induction				23	24	23	22	22	23
	Q8BRH3;Q8BRH3-2	Rho GTPase-activating protein 19;Isoform 2 of Rho GTPase-activating protein 19	RHG19_MOUSE	Arhgap19	361	379	416	304	449	447		385.333	400			yeast mito homolog, mito protein domain				2	3	3	3	3	3
	Q6DFV3	Rho GTPase-activating protein 21	RHG21_MOUSE	Arhgap21	1969	1736	1475	1029	1911	1755		1726.67	1565			yeast mito homolog, mito protein domain, MS/MS				2	2	2	2	2	2
	Q8BYW1	Rho GTPase-activating protein 25	RHG25_MOUSE	Arhgap25	22388	22865	21630	18434	19775	20644		22294.3	19617.7			mito protein domain				25	26	25	26	24	25
	Q6ZQ82	Rho GTPase-activating protein 26	RHG26_MOUSE	Arhgap26	2135	1871	1828	1278	1686	1541		1944.67	1501.67			mito protein domain				12	12	12	12	12	12
	A2AB59-2	Isoform 2 of Rho GTPase-activating protein 27	RHG27_MOUSE	Arhgap27	5126	4578	3789	3262	5198	4516		4497.67	4325.33			yeast mito homolog, mito protein domain				12	12	12	12	12	12
	Q640N3;Q640N3-2	Rho GTPase-activating protein 30;Isoform 2 of Rho GTPase-activating protein 30	RHG30_MOUSE	Arhgap30	17158	19600	19235	14785	16775	16496		18664.3	16018.7			mito protein domain				34	33	34	31	31	32
	Q80Z68	Rho GTPase-activating protein 4	Q80Z68_MOUSE	Arhgap4	18100	18034	18313	13154	16220	16486		18149	15286.7			mito protein domain				32	33	32	33	30	32
	Q3TBD2	Rho GTPase-activating protein 45	HMHA1_MOUSE	Arhgap45	66207	69175	64745	56792	59252	60328		66709	58790.7			mito protein domain				51	51	49	52	51	52
	Q1HDU4;Q8QZW8	ArhGAP9;Rho GTPase-activating protein 9	Q1HDU4_MOUSE;Q8QZW8_MOUSE	Arhgap9	15378	16129	15602	12398	14821	13913		15703	13710.7			mito protein domain				14	13	14	13	13	14
	Q99PT1	Rho GDP-dissociation inhibitor 1	GDIR1_MOUSE	Arhgdia	1825018	1670033	1714347	1344412	1648436	1590214		1736466	1.52769e+06							16	16	16	16	15	16
	Q61599	Rho GDP-dissociation inhibitor 2	GDIR2_MOUSE	Arhgdib	2045271	2072331	2053377	1551229	1875054	1788481		2056993	1.73825e+06			MS/MS				22	22	22	22	22	22
	Q61210	Rho guanine nucleotide exchange factor 1	ARHG1_MOUSE	Arhgef1	1469	1591	1855	1481	1595	1633		1638.33	1569.67							3	3	3	3	3	3
	Q61210-5	Isoform 5 of Rho guanine nucleotide exchange factor 1	ARHG1_MOUSE	Arhgef1	129889	133133	130727	112667	122252	127553		131250	120824							60	60	59	62	57	60
	Q6P9R4	Rho guanine nucleotide exchange factor 18	ARHGI_MOUSE	Arhgef18	3980	4409	4088	3434	4197	3987		4159	3872.67			mito protein domain				16	16	16	16	14	15
	Q60875;Q60875-4;Q60875-5	Rho guanine nucleotide exchange factor 2;Isoform 4 of Rho guanine nucleotide exchange factor 2;Isoform 5 of Rho guanine nucleotide exchange factor 2	ARHG2_MOUSE	Arhgef2	27451	28417	28690	21476	26068	25449		28186	24331			mito protein domain				43	43	42	43	42	44
	Q8K4I3	Rho guanine nucleotide exchange factor 6	ARHG6_MOUSE	Arhgef6	36925	35402	34739	24032	30501	31154		35688.7	28562.3			mito protein domain				42	41	40	41	37	41
	Q9ES28-8	Isoform H of Rho guanine nucleotide exchange factor 7	ARHG7_MOUSE	Arhgef7	15056	17388	16492	12423	14442	13814		16312	13559.7			mito protein domain				25	25	25	25	25	24
	A2BH40	AT-rich interactive domain-containing protein 1A	ARI1A_MOUSE	Arid1a	44368	67803	72317	17032	48269	76946		61496	47415.7							61	60	60	60	60	60
	E9Q4N7	AT-rich interactive domain-containing protein 1B	ARI1B_MOUSE	Arid1b	812	891	899	838	856	776		867.333	823.333							12	11	11	11	12	13
	E9Q7E2	AT-rich interactive domain-containing protein 2	ARID2_MOUSE	Arid2	4877	2452	2132	1212	3253	2111		3153.67	2192							16	15	16	16	16	15
	Q62431	AT-rich interactive domain-containing protein 3A	ARI3A_MOUSE	Arid3a	315	652	196	447	354	288		387.667	363							3	4	2	4	3	4
	F8VPQ2	AT-rich interactive domain-containing protein 4A	ARI4A_MOUSE	Arid4a	2154	1979	1929	1871	1984	1895		2020.67	1916.67							15	15	15	15	15	15
	A2CG63;A2CG63-2	AT-rich interactive domain-containing protein 4B;Isoform 2 of AT-rich interactive domain-containing protein 4B	ARI4B_MOUSE	Arid4b	297	285	288	216	269	269		290	251.333							4	4	4	4	4	4
	Q3U108;Q3U108-2;Q3U108-3	AT-rich interactive domain-containing protein 5A;Isoform 2 of AT-rich interactive domain-containing protein 5A;Isoform 3 of AT-rich interactive domain-containing protein 5A	ARI5A_MOUSE	Arid5a	976	1474	1428	1387	1432	1363		1292.67	1394							6	7	7	7	7	7
	Q9Z1K5	E3 ubiquitin-protein ligase ARIH1	ARI1_MOUSE	Arih1	20200	18236	18535	14422	17827	17932		18990.3	16727			mito protein domain, coexpression				24	25	25	24	24	25
	Q9Z1K6	E3 ubiquitin-protein ligase ARIH2	ARI2_MOUSE	Arih2	3604	3425	3197	2399	3208	2984		3408.67	2863.67			mito protein domain				10	10	10	10	9	10
	P61211	ADP-ribosylation factor-like protein 1	ARL1_MOUSE	Arl1	57065	39611	43115	25369	44396	40866		46597	36877			mito protein domain				10	10	10	10	9	10
	Q8BIX3	ARL14 effector protein	AL14E_MOUSE	Arl14ep	1922	1798	1684	1497	1535	1491		1801.33	1507.67			coexpression				4	4	4	4	4	4
	Q9D0J4	ADP-ribosylation factor-like protein 2	ARL2_MOUSE	Arl2	29171	14794	26614	25361	19309	14596		23526.3	19755.3		MitoCarta3.0	literature, mito protein domain, coexpression, MS/MS+	IMS	Mitochondrial dynamics and surveillance > Fusion		8	8	8	8	8	8
	Q9D385;Q9D385-2	ADP-ribosylation factor-like protein 2-binding protein;Isoform 2 of ADP-ribosylation factor-like protein 2-binding protein	AR2BP_MOUSE	Arl2bp	4549	3334	3095	2762	3284	3505		3659.33	3183.67			mito protein domain				5	5	5	4	5	5
	Q9WUL7	ADP-ribosylation factor-like protein 3	ARL3_MOUSE	Arl3	23064	19253	20423	17919	18741	18794		20913.3	18484.7			mito protein domain				6	6	6	6	6	6
	P61208	ADP-ribosylation factor-like protein 4C	ARL4C_MOUSE	Arl4c	1257	1145	1181	502	716	765		1194.33	661			Rickettsial homolog, mito protein domain				3	3	3	3	3	2
	Q80ZU0	ADP-ribosylation factor-like protein 5A	ARL5A_MOUSE	Arl5a	2561	2225	2103	1551	2264	2137		2296.33	1984			Rickettsial homolog, mito protein domain				2	2	2	2	2	2
	O88848;O88848-2	ADP-ribosylation factor-like protein 6;Isoform 2 of ADP-ribosylation factor-like protein 6	ARL6_MOUSE	Arl6	895	548	544	445	734	562		662.333	580.333			mito protein domain, MS/MS				2	2	2	2	2	2
	Q9JKW0	ADP-ribosylation factor-like protein 6-interacting protein 1	AR6P1_MOUSE	Arl6ip1	4515	5332	4304	3149	5917	5403		4717	4823							2	2	2	2	2	2
	Q9JM93	ADP-ribosylation factor-like protein 6-interacting protein 4	AR6P4_MOUSE	Arl6ip4	3904	3679	3561	2982	3993	3355		3714.67	3443.33							3	3	3	3	3	3
	Q8R5J9	PRA1 family protein 3	PRAF3_MOUSE	Arl6ip5	175667	178736	167352	130720	150122	146049		173918	142297							7	7	7	7	8	7
	Q8BH07	ADP-ribosylation factor-like protein 6-interacting protein 6	AR6P6_MOUSE	Arl6ip6	1084	1211	1292	1297	1252	1225		1195.67	1258			targetP signal				2	2	2	2	2	2
	Q8VEH3	ADP-ribosylation factor-like protein 8A	ARL8A_MOUSE	Arl8a	57952	59774	56279	41833	46115	45018		58001.7	44322			mito protein domain, MS/MS				10	10	10	10	10	10
	Q9CQW2	ADP-ribosylation factor-like protein 8B	ARL8B_MOUSE	Arl8b	34494	33383	31433	24797	31834	31014		33103.3	29215			mito protein domain				4	4	4	4	4	4
	Q9D7A8	Armadillo repeat-containing protein 1	ARMC1_MOUSE	Armc1	9553	9218	9207	7572	8238	8716		9326	8175.33		mito-interacting	MS/MS+				7	7	7	8	7	8
	Q9D0L7	Armadillo repeat-containing protein 10	ARM10_MOUSE	Armc10	22149	23575	22203	20821	20131	22303		22642.3	21085		MitoCarta3.0	GFP, MS/MS	MOM	Mitochondrial dynamics and surveillance > Fission | Mitochondrial dynamics and surveillance > Trafficking		10	10	9	9	10	10
	Q8BNU0	Armadillo repeat-containing protein 6	ARMC6_MOUSE	Armc6	11221	10346	10224	7962	10428	9877		10597	9422.33							18	18	16	17	17	18
	Q9DBR3	Armadillo repeat-containing protein 8	ARMC8_MOUSE	Armc8	16619	15629	14635	12206	14727	15542		15627.7	14158.3							24	23	24	23	23	25
	Q6PD19	Armadillo-like helical domain-containing protein 3	ARMD3_MOUSE	Armh3	697	561	569	370	588	539		609	499							4	4	4	4	4	3
	A6H630	Damage-control phosphatase ARMT1	ARMT1_MOUSE	Armt1	6523	5889	5453	5061	5744	5421		5955	5408.67							15	15	15	15	15	15
	P53762;P53762-2	Aryl hydrocarbon receptor nuclear translocator;Isoform Short of Aryl hydrocarbon receptor nuclear translocator	ARNT_MOUSE	Arnt	630	491	482	273	659	537		534.333	489.667			mito protein domain				4	4	4	4	4	4
	Q9R0Q6	Actin-related protein 2/3 complex subunit 1A	ARC1A_MOUSE	Arpc1a	23072	19474	18918	14080	17855	18720		20488	16885			mito protein domain				14	14	15	14	14	14
	Q9WV32	Actin-related protein 2/3 complex subunit 1B	ARC1B_MOUSE	Arpc1b	647431	580276	561017	399415	512777	525484		596241	479225			mito protein domain				27	27	27	27	27	27
	Q9CVB6	Actin-related protein 2/3 complex subunit 2	ARPC2_MOUSE	Arpc2	845397	738549	752824	513872	704011	697274		778923	638386			MS/MS				27	29	28	28	27	28
	Q9JM76	Actin-related protein 2/3 complex subunit 3	ARPC3_MOUSE	Arpc3	594521	611894	561048	419381	450992	461813		589154	444062			yeast mito homolog				13	13	12	13	11	13
	P59999	Actin-related protein 2/3 complex subunit 4	ARPC4_MOUSE	Arpc4	1034383	1054084	1023756	763544	805427	878833		1.03741e+06	815935			targetP signal				12	12	12	9	11	11
	Q9CPW4	Actin-related protein 2/3 complex subunit 5	ARPC5_MOUSE	Arpc5	630565	629639	629175	446674	567320	550516		629793	521503			yeast mito homolog				14	13	14	13	13	13
	Q9D898	Actin-related protein 2/3 complex subunit 5-like protein	ARP5L_MOUSE	Arpc5l	100949	108409	105083	87150	87786	91918		104814	88951.3			yeast mito homolog				8	8	8	8	7	8
	P56212	cAMP-regulated phosphoprotein 19	ARP19_MOUSE	Arpp19	201450	193631	199353	156394	171725	182440		198145	170186							10	10	10	9	10	10
	Q8BWG8-2	Isoform 1B of Beta-arrestin-1	ARRB1_MOUSE	Arrb1	10719	8459	8967	6054	10008	9012		9381.67	8358							10	10	10	10	11	11
	Q91YI4;Q91YI4-2	Beta-arrestin-2;Isoform 2 of Beta-arrestin-2	ARRB2_MOUSE	Arrb2	65687	57460	59782	43389	56159	60576		60976.3	53374.7							24	23	24	25	24	24
	Q99KN1	Arrestin domain-containing protein 1	ARRD1_MOUSE	Arrdc1	3841	3089	2874	2662	3216	2857		3268	2911.67							6	6	5	6	6	6
	P50429	Arylsulfatase B	ARSB_MOUSE	Arsb	14484	14768	15165	7058	13190	10566		14805.7	10271.3							11	11	11	11	10	11
	C0HK79;C0HK80	Adipocyte-related X-chromosome expressed sequence 1;Adipocyte-related X-chromosome expressed sequence 2	ARXS1_MOUSE;ARXS2_MOUSE	Arxes1;Arxes2	799	589	634	596	803	722		674	707							2	2	2	2	2	2
	Q9WV54	Acid ceramidase	ASAH1_MOUSE	Asah1	9808	9089	9660	6795	9096	7817		9519	7902.67			MS/MS++				12	12	13	13	13	13
	Q9QWY8;Q9QWY8-2;Q9QWY8-3;Q9QWY8-4	Arf-GAP with SH3 domain, ANK repeat and PH domain-containing protein 1;Isoform 2 of Arf-GAP with SH3 domain, ANK repeat and PH domain-containing protein 1;Isoform 3 of Arf-GAP with SH3 domain, ANK repeat and PH domain-containing protein 1;Isoform 4 of Arf-GAP with SH3 domain, ANK repeat and PH domain-containing protein 1	ASAP1_MOUSE	Asap1	876	918	809	823	749	890		867.667	820.667			targetP signal, mito protein domain				6	6	6	6	6	6
	Q8K0L0;Q8K0L0-2	Ankyrin repeat and SOCS box protein 2;Isoform 2 of Ankyrin repeat and SOCS box protein 2	ASB2_MOUSE	Asb2	163	108	142	0	166	154		137.667	106.667			Rickettsial homolog, mito protein domain				3	2	4	Filtered	4	2
	Q9WV72	Ankyrin repeat and SOCS box protein 3	ASB3_MOUSE	Asb3	1286	1076	933	855	1034	1013		1098.33	967.333			Rickettsial homolog, mito protein domain				4	4	4	4	4	4
	Q91ZU1	Ankyrin repeat and SOCS box protein 6	ASB6_MOUSE	Asb6	2835	2323	2228	2657	2178	2130		2462	2321.67			mito protein domain				7	7	7	7	7	7
	Q9D8Z1	Activating signal cointegrator 1 complex subunit 1	ASCC1_MOUSE	Ascc1	3349	2963	2905	2311	2895	2686		3072.33	2630.67			mito protein domain				6	6	6	6	6	6
	Q91WR3;Q91WR3-3	Activating signal cointegrator 1 complex subunit 2;Isoform 3 of Activating signal cointegrator 1 complex subunit 2	ASCC2_MOUSE	Ascc2	3156	2861	2925	1950	2894	2378		2980.67	2407.33			mito protein domain				13	13	14	13	14	13
	E9PZJ8	Activating signal cointegrator 1 complex subunit 3	ASCC3_MOUSE	Ascc3	2919	2492	2283	1624	2692	1909		2564.67	2075			Rickettsial homolog, mito protein domain				37	39	37	38	39	38
	Q9CQE6	Histone chaperone ASF1A	ASF1A_MOUSE	Asf1a	8213	10094	10212	9531	11571	10116		9506.33	10406							3	3	3	4	3	3
	Q9DAP7	Histone chaperone ASF1B	ASF1B_MOUSE	Asf1b	54487	49689	54319	38147	54793	49784		52831.7	47574.7							6	6	6	6	6	6
	Q91X20	Set1/Ash2 histone methyltransferase complex subunit ASH2	ASH2L_MOUSE	Ash2l	15534	13631	13220	12686	14909	13978		14128.3	13857.7			mito protein domain				19	19	19	19	18	19
	Q91YI0	Argininosuccinate lyase	ARLY_MOUSE	Asl	25576	22948	25175	16970	23205	22634		24566.3	20936.3			Rickettsial homolog, mito protein domain, coexpression				16	15	16	16	16	16
	Q61024	Asparagine synthetase [glutamine-hydrolyzing]	ASNS_MOUSE	Asns	21448	19941	21795	13293	21658	17577		21061.3	17509.3			mito protein domain				25	25	25	25	25	26
	Q8CJ27;Q8CJ27-2	Abnormal spindle-like microcephaly-associated protein homolog;Isoform 2 of Abnormal spindle-like microcephaly-associated protein homolog	ASPM_MOUSE	Aspm	61	50	41	34	68	57		50.6667	53							3	3	3	3	3	3
	Q8VBT9	Tether containing UBX domain for GLUT4	ASPC1_MOUSE	Aspscr1	19967	24129	21113	17802	18941	17009		21736.3	17917.3			targetP signal				20	20	20	20	20	19
	Q8C0M9	Isoaspartyl peptidase/L-asparaginase	ASGL1_MOUSE	Asrgl1	17532	18994	18182	16347	16460	16832		18236	16546.3			targetP signal				10	10	10	10	10	10
	P16460	Argininosuccinate synthase	ASSY_MOUSE	Ass1	109272	122335	115165	61441	81657	91235		115591	78111			Rickettsial homolog				23	24	24	24	23	24
	Q8BZ32	Putative Polycomb group protein ASXL2	ASXL2_MOUSE	Asxl2	1092	1548	1041	1694	571	1083		1227	1116							2	2	2	2	1	2
	Q9D5T0	ATPase family AAA domain-containing protein 1	ATAD1_MOUSE	Atad1	31809	27163	25690	19984	27486	26849		28220.7	24773		MitoCarta3.0	yeast mito homolog++, Rickettsial homolog, mito protein domain, coexpression, MS/MS++	MOM	Protein import, sorting and homeostasis > Protein homeostasis > Proteases		19	19	17	19	18	19
	Q8CDM1	ATPase family AAA domain-containing protein 2	ATAD2_MOUSE	Atad2	8865	8412	8375	7088	8178	7882		8550.67	7716			Rickettsial homolog, mito protein domain				27	27	26	27	26	25
	E9Q166	ATPase family, AAA domain-containing 2B	E9Q166_MOUSE	Atad2b	5564	5237	5041	4305	4971	5097		5280.67	4791			Rickettsial homolog, mito protein domain				25	25	25	24	22	24
	Q925I1	ATPase family AAA domain-containing protein 3	ATAD3_MOUSE	Atad3	21590	23411	21375	21182	20328	20293		22125.3	20601		MitoCarta3.0	APEX_IMS, APEX_matrix, GFP, yeast mito homolog, Rickettsial homolog, mito protein domain+, coexpression, MS/MS++	MIM	Mitochondrial central dogma > mtDNA maintenance > mtDNA nucleoid | Mitochondrial dynamics and surveillance > Organelle contact sites | Mitochondrial dynamics and surveillance > Intramitochondrial membrane interactions		25	26	25	25	24	26
	Q4QY64	ATPase family AAA domain-containing protein 5	ATAD5_MOUSE	Atad5	2648	2622	2650	2025	2623	2402		2640	2350			mito protein domain				30	30	30	29	29	30
	Q9Z2A5-2	Isoform ATE1-2 of Arginyl-tRNA--protein transferase 1	ATE1_MOUSE	Ate1	7276	6769	7531	5648	5714	6459		7192	5940.33							8	8	8	9	8	8
	P16951	Cyclic AMP-dependent transcription factor ATF-2	ATF2_MOUSE	Atf2	1075	1000	1051	724	1107	870		1042	900.333			mito protein domain				4	4	4	4	4	4
	Q8R0S1	Cyclic AMP-dependent transcription factor ATF-7	ATF7_MOUSE	Atf7	1032	838	818	714	945	781		896	813.333							2	2	2	2	1	2
	Q7TT18	Activating transcription factor 7-interacting protein 1	MCAF1_MOUSE	Atf7ip	1776	1927	1976	1321	1567	1749		1893	1545.67							8	8	8	8	8	8
	Q9D8Z6	Autophagy-related protein 101	ATGA1_MOUSE	Atg101	246	237	26	147	179	164		169.667	163.333							2	2	1	1	1	2
	Q9CQY1	Ubiquitin-like protein ATG12	ATG12_MOUSE	Atg12	5399	4771	4834	3721	2916	3260		5001.33	3299							2	2	2	2	2	2
	Q91YI1;Q91YI1-2	Autophagy-related protein 13;Isoform 2 of Autophagy-related protein 13	ATG13_MOUSE	Atg13	318	238	161	179	244	206		239	209.667							2	2	1	2	2	2
	Q8C0J2;Q8C0J2-2;Q8C0J2-3;Q8C0J2-4;Q8C0J2-5	Autophagy-related protein 16-1;Isoform 2 of Autophagy-related protein 16-1;Isoform 3 of Autophagy-related protein 16-1;Isoform 4 of Autophagy-related protein 16-1;Isoform 5 of Autophagy-related protein 16-1	A16L1_MOUSE	Atg16l1	302	264	278	213	323	222		281.333	252.667			targetP signal, mito protein domain				3	3	3	3	3	3
	Q6KAU8;Q6KAU8-2	Autophagy-related protein 16-2;Isoform 2 of Autophagy-related protein 16-2	A16L2_MOUSE	Atg16l2	268	207	198	183	185	184		224.333	184			mito protein domain				2	2	2	2	2	2
	Q6P4T0	Autophagy-related protein 2 homolog A	ATG2A_MOUSE	Atg2a	169	125	130	70	130	109		141.333	103							4	4	4	3	4	4
	Q80XK6	Autophagy-related protein 2 homolog B	ATG2B_MOUSE	Atg2b	2141	1378	1690	1416	2354	2159		1736.33	1976.33							13	13	14	12	13	13
	Q9CPX6	Ubiquitin-like-conjugating enzyme ATG3	ATG3_MOUSE	Atg3	27112	28077	26396	20347	24582	24469		27195	23132.7							10	10	10	9	10	10
	Q8C9S8	Cysteine protease ATG4A	ATG4A_MOUSE	Atg4a	561	508	470	324	414	394		513	377.333							4	4	4	4	4	4
	Q8BGE6	Cysteine protease ATG4B	ATG4B_MOUSE	Atg4b	7251	6052	5870	4668	5679	5469		6391	5272							11	11	11	11	11	11
	Q99J83	Autophagy protein 5	ATG5_MOUSE	Atg5	12802	12583	11879	9273	11772	10862		12421.3	10635.7							10	10	10	10	10	10
	Q9D906	Ubiquitin-like modifier-activating enzyme ATG7	ATG7_MOUSE	Atg7	10917	9965	9723	8050	9723	8944		10201.7	8905.67			targetP signal, yeast mito homolog				22	22	21	22	22	22
	Q9CWJ9	Bifunctional purine biosynthesis protein ATIC	PUR9_MOUSE	Atic	383938	407791	414484	382208	399950	397916		402071	393358		mito-interacting	GFP, mito protein domain, MS/MS				43	43	41	42	40	44
	Q6PA06	Atlastin-2	ATLA2_MOUSE	Atl2	3490	3709	3454	3168	3400	3240		3551	3269.33							11	11	11	11	11	11
	Q91YH5	Atlastin-3	ATLA3_MOUSE	Atl3	34982	33495	31492	25414	32007	30802		33323	29407.7							24	26	24	25	23	24
	Q62388	Serine-protein kinase ATM	ATM_MOUSE	Atm	1639	1657	1599	1370	1496	1374		1631.67	1413.33			yeast mito homolog, mito protein domain				37	37	36	36	36	36
	O35126	Atrophin-1	ATN1_MOUSE	Atn1	74	92	85	73	109	84		83.6667	88.6667			induction				2	2	2	2	2	2
	O08997	Copper transport protein ATOX1	ATOX1_MOUSE	Atox1	144919	116342	118744	80855	118731	113672		126668	104419			mito protein domain, induction, MS/MS				5	5	5	5	5	5
	O54827	Probable phospholipid-transporting ATPase VA	AT10A_MOUSE	Atp10a	544	412	233	215	345	224		396.333	261.333			yeast mito homolog				3	3	2	3	3	3
	Q6DFW5	Phospholipid-transporting ATPase	Q6DFW5_MOUSE	Atp11b	7366	7253	6754	5624	6789	6545		7124.33	6319.33							24	24	24	24	24	23
	Q9QZW0-2	Isoform 2 of Phospholipid-transporting ATPase 11C	AT11C_MOUSE	Atp11c	2043	1693	2251	1643	1102	1740		1995.67	1495			targetP signal				5	5	5	5	5	5
	Q9EPE9	Manganese-transporting ATPase 13A1	AT131_MOUSE	Atp13a1	12066	12262	11784	9219	10848	10629		12037.3	10232			yeast mito homolog, coexpression				34	35	35	35	34	35
	Q5XF89;Q5XF89-2	Probable cation-transporting ATPase 13A3;Isoform 2 of Probable cation-transporting ATPase 13A3	AT133_MOUSE	Atp13a3	1160	643	748	664	1091	848		850.333	867.667							6	8	9	7	7	8
	Q8VDN2	Sodium/potassium-transporting ATPase subunit alpha-1	AT1A1_MOUSE	Atp1a1	133378	144513	122954	122513	129392	132898		133615	128268			induction				54	55	52	53	54	54
	P97370	Sodium/potassium-transporting ATPase subunit beta-3	AT1B3_MOUSE	Atp1b3	166853	157874	144541	142257	123319	128073		156423	131216							16	16	16	16	16	16
	Q8R429	Sarcoplasmic/endoplasmic reticulum calcium ATPase 1	AT2A1_MOUSE	Atp2a1	1181	1602	1032	901	1616	1296		1271.67	1271							4	4	3	3	4	4
	O55143	Sarcoplasmic/endoplasmic reticulum calcium ATPase 2	AT2A2_MOUSE	Atp2a2	42169	40806	39405	29870	39398	36965		40793.3	35411			coexpression				44	44	43	43	43	43
	Q64518	Sarcoplasmic/endoplasmic reticulum calcium ATPase 3	AT2A3_MOUSE	Atp2a3	48457	49491	47701	38164	44897	45097		48549.7	42719.3							44	44	42	44	40	43
	G5E829	Plasma membrane calcium-transporting ATPase 1	AT2B1_MOUSE	Atp2b1	17361	16736	16723	14083	17516	16618		16940	16072.3							33	32	32	32	32	31
	Q6Q477	Plasma membrane calcium-transporting ATPase 4	AT2B4_MOUSE	Atp2b4	4177	4373	4265	3574	3884	3751		4271.67	3736.33							15	15	15	15	14	15
	Q80XR2	Calcium-transporting ATPase type 2C member 1	AT2C1_MOUSE	Atp2c1	402	314	357	389	449	413		357.667	417							5	4	5	5	6	6
	Q03265	ATP synthase subunit alpha, mitochondrial	ATPA_MOUSE	Atp5f1a	1320086	1423039	1299737	1274635	1215222	1274402		1.34762e+06	1254753		MitoCarta3.0	literature, APEX_matrix, targetP signal+, yeast mito homolog++, Rickettsial homolog, mito protein domain, induction, coexpression++, MS/MS++	MIM	OXPHOS > Complex V > CV subunits | OXPHOS > OXPHOS subunits		43	43	41	43	42	43
	P56480	ATP synthase subunit beta, mitochondrial	ATPB_MOUSE	Atp5f1b	1493536	1651012	1490941	1463796	1312566	1395693		1545163	1390685		MitoCarta3.0	literature, APEX_matrix, targetP signal+, yeast mito homolog++, Rickettsial homolog, mito protein domain, coexpression++, MS/MS++	MIM	OXPHOS > Complex V > CV subunits | OXPHOS > OXPHOS subunits		29	29	28	29	28	29
	Q91VR2	ATP synthase subunit gamma, mitochondrial	ATPG_MOUSE	Atp5f1c	228813	227005	215167	193132	215701	217099		223662	208644		MitoCarta3.0	literature, yeast mito homolog++, Rickettsial homolog, mito protein domain, induction, MS/MS++	MIM	OXPHOS > Complex V > CV subunits | OXPHOS > OXPHOS subunits		13	13	13	12	13	12
	Q9D3D9	ATP synthase subunit delta, mitochondrial	ATPD_MOUSE	Atp5f1d	94102	98439	101901	82124	104203	94116		98147.3	93481		MitoCarta3.0	literature, APEX_matrix, targetP signal, yeast mito homolog++, Rickettsial homolog, mito protein domain+, induction, coexpression++, MS/MS+	MIM	OXPHOS > Complex V > CV subunits | OXPHOS > OXPHOS subunits		5	5	5	5	5	5
	P56382	ATP synthase subunit epsilon, mitochondrial	ATP5E_MOUSE	Atp5f1e	141599	174504	162788	145376	106212	150200		159630	133929		MitoCarta3.0	literature, targetP signal, yeast mito homolog++, mito protein domain+, induction, coexpression++, MS/MS++	MIM	OXPHOS > Complex V > CV subunits | OXPHOS > OXPHOS subunits		3	3	3	3	3	3
	O35143	ATPase inhibitor, mitochondrial	ATIF1_MOUSE	ATP5IF1	132042	144584	142169	129942	131239	141523		139598	134235		MitoCarta3.0	literature, APEX_matrix, targetP signal, yeast mito homolog++, mito protein domain+, MS/MS++	Matrix	OXPHOS > Complex V > CV subunits | OXPHOS > OXPHOS subunits		9	9	9	8	9	9
	Q78IK2	ATP synthase membrane subunit DAPIT, mitochondrial	ATPMD_MOUSE	Atp5md	243510	243440	221885	206017	214014	216902		236278	212311		MitoCarta3.0	GFP, MS/MS++	MIM	OXPHOS > Complex V > CV subunits | OXPHOS > OXPHOS subunits | Mitochondrial dynamics and surveillance > Cristae formation		3	3	3	3	3	3
	Q06185	ATP synthase subunit e, mitochondrial	ATP5I_MOUSE	Atp5me	368957	409309	380323	369461	356345	365131		386196	363646		MitoCarta3.0	literature, APEX_IMS, yeast mito homolog++, mito protein domain+, coexpression++, MS/MS++	MIM	OXPHOS > Complex V > CV subunits | OXPHOS > OXPHOS subunits | Mitochondrial dynamics and surveillance > Cristae formation		5	5	5	5	5	5
	P56135	ATP synthase subunit f, mitochondrial	ATPK_MOUSE	Atp5mf	426769	549214	465953	488358	357946	420145		480645	422150		MitoCarta3.0	literature, coexpression++, MS/MS++	MIM	OXPHOS > Complex V > CV subunits | OXPHOS > OXPHOS subunits		4	5	5	5	5	5
	Q9CPQ8	ATP synthase subunit g, mitochondrial	ATP5L_MOUSE	Atp5mg	349700	407067	366087	354379	347842	356908		374285	353043		MitoCarta3.0	literature, APEX_matrix, yeast mito homolog++, mito protein domain+, MS/MS++	MIM	OXPHOS > Complex V > CV subunits | OXPHOS > OXPHOS subunits | Mitochondrial dynamics and surveillance > Cristae formation		7	7	7	7	7	7
	Q9CQQ7	ATP synthase F(0) complex subunit B1, mitochondrial	AT5F1_MOUSE	Atp5pb	166350	175097	156548	128291	144538	138870		165998	137233		MitoCarta3.0	literature, APEX_matrix, yeast mito homolog++, mito protein domain+, MS/MS++	MIM	OXPHOS > Complex V > CV subunits | OXPHOS > OXPHOS subunits		19	20	20	20	19	19
	Q9DCX2	ATP synthase subunit d, mitochondrial	ATP5H_MOUSE	Atp5pd	344960	388361	348250	315580	333972	329199		360524	326250		MitoCarta3.0	literature, APEX_matrix, yeast mito homolog++, mito protein domain+, MS/MS++	MIM	OXPHOS > Complex V > CV subunits | OXPHOS > OXPHOS subunits		16	16	16	16	15	15
	P97450	ATP synthase-coupling factor 6, mitochondrial	ATP5J_MOUSE	Atp5pf	14178	16378	9401	17105	10311	9997		13319	12471		MitoCarta3.0	literature, APEX_IMS, targetP signal, mito protein domain+, induction, coexpression++, MS/MS++	MIM	OXPHOS > Complex V > CV subunits | OXPHOS > OXPHOS subunits		6	5	5	6	4	6
	Q9DB20	ATP synthase subunit O, mitochondrial	ATPO_MOUSE	Atp5po	373704	451631	398134	420874	324015	369488		407823	371459		MitoCarta3.0	literature, APEX_matrix, targetP signal, yeast mito homolog++, Rickettsial homolog, mito protein domain+, induction, MS/MS++	MIM	OXPHOS > Complex V > CV subunits | OXPHOS > OXPHOS subunits		14	14	14	14	14	15
	Q9R1Q9	V-type proton ATPase subunit S1	VAS1_MOUSE	Atp6ap1	3726	3295	3134	1870	3192	2936		3385	2666							6	6	6	5	6	6
	Q9CYN9	Renin receptor	RENR_MOUSE	Atp6ap2	5898	4612	3231	3266	5110	3498		4580.33	3958							7	7	7	7	7	7
	P15920	V-type proton ATPase 116 kDa subunit a2	VPP2_MOUSE	Atp6v0a2	4202	4571	4278	3282	4150	3829		4350.33	3753.67							12	10	12	11	11	11
	P51863	V-type proton ATPase subunit d 1	VA0D1_MOUSE	Atp6v0d1	11705	9207	8922	6204	9490	9045		9944.67	8246.33							9	9	9	9	9	9
	P50516	V-type proton ATPase catalytic subunit A	VATA_MOUSE	Atp6v1a	77212	73534	72571	55853	65216	63063		74439	61377.3			Rickettsial homolog, mito protein domain				36	37	37	37	35	37
	P62814	V-type proton ATPase subunit B, brain isoform	VATB2_MOUSE	Atp6v1b2	55470	52089	49762	38136	45552	44263		52440.3	42650.3			Rickettsial homolog, mito protein domain				28	28	28	28	26	27
	Q9Z1G3	V-type proton ATPase subunit C 1	VATC1_MOUSE	Atp6v1c1	20054	16603	16881	12121	17018	15407		17846	14848.7			induction				18	18	18	18	18	18
	P57746	V-type proton ATPase subunit D	VATD_MOUSE	Atp6v1d	13355	13225	12016	9452	11351	11468		12865.3	10757			induction				7	7	6	7	6	7
	P50518	V-type proton ATPase subunit E 1	VATE1_MOUSE	Atp6v1e1	36882	39925	37820	30397	35747	33611		38209	33251.7							13	12	12	10	11	12
	Q9D1K2	V-type proton ATPase subunit F	VATF_MOUSE	Atp6v1f	15410	13302	12606	12387	17245	12177		13772.7	13936.3							6	6	6	6	6	6
	Q9CR51	V-type proton ATPase subunit G 1	VATG1_MOUSE	Atp6v1g1	28551	27701	28871	20588	31103	27557		28374.3	26416							7	7	7	6	6	7
	Q8BVE3	V-type proton ATPase subunit H	VATH_MOUSE	Atp6v1h	19527	19238	18633	14951	18007	17761		19132.7	16906.3							19	20	20	20	18	18
	P98199	Phospholipid-transporting ATPase ID	AT8B2_MOUSE	Atp8b2	236	290	274	244	215	253		266.667	237.333							3	3	3	3	2	3
	A2ANX3	Phospholipid-transporting ATPase	A2ANX3_MOUSE	Atp8b4	26244	12422	9823	11165	18912	11528		16163	13868.3							8	10	8	7	10	9
	Q811I0	ATP synthase mitochondrial F1 complex assembly factor 1	ATPF1_MOUSE	Atpaf1	2188	2079	2018	1993	2106	1978		2095	2025.67							5	5	5	5	4	5
	Q91YY4	ATP synthase mitochondrial F1 complex assembly factor 2	ATPF2_MOUSE	Atpaf2	7338	7334	6611	5024	6576	5644		7094.33	5748		MitoCarta3.0	literature, targetP signal+, yeast mito homolog++, mito protein domain+, induction, coexpression, MS/MS	Matrix	OXPHOS > Complex V > CV assembly factors | OXPHOS > OXPHOS assembly factors		9	10	10	8	10	9
	Q9JKK8	Serine/threonine-protein kinase ATR	ATR_MOUSE	Atr	385	341	318	300	328	310		348	312.667							11	12	12	12	12	12
	Q8BMG1	ATR-interacting protein	ATRIP_MOUSE	Atrip	1889	1383	1247	765	905	1008		1506.33	892.667			coexpression				2	2	2	2	2	2
	Q61687	Transcriptional regulator ATRX	ATRX_MOUSE	Atrx	5603	5506	5543	4415	7184	5603		5550.67	5734			mito protein domain				51	50	51	51	49	51
	P54254	Ataxin-1	ATX1_MOUSE	Atxn1	1708	1768	1704	912	1848	1325		1726.67	1361.67							5	5	5	4	5	4
	P28658	Ataxin-10	ATX10_MOUSE	Atxn10	32338	28715	29254	22742	27823	27835		30102.3	26133.3							23	24	23	24	22	23
	O70305;O70305-2;O70305-3	Ataxin-2;Isoform 2 of Ataxin-2;Isoform 3 of Ataxin-2	ATX2_MOUSE	Atxn2	609	473	489	482	589	588		523.667	553			targetP signal, yeast mito homolog, mito protein domain, coexpression				5	5	5	5	5	5
	Q7TQH0-2	Isoform 2 of Ataxin-2-like protein	ATX2L_MOUSE	Atxn2l	29109	31270	29864	21941	29580	26923		30081	26148			yeast mito homolog, mito protein domain				38	37	36	37	37	37
	Q9CVD2	Ataxin-3	ATX3_MOUSE	Atxn3	1463	1467	1380	1308	1394	1276		1436.67	1326							4	4	4	4	4	4
	A2AWT3;A2AWT3-2	Ataxin-7-like protein 3;Isoform 2 of Ataxin-7-like protein 3	AT7L3_MOUSE	Atxn7l3	655	628	619	536	600	613		634	583							2	2	2	2	2	2
	Q9JLZ3	Methylglutaconyl-CoA hydratase, mitochondrial	AUHM_MOUSE	Auh	15261	16693	15930	13953	15344	12918		15961.3	14071.7		MitoCarta3.0	literature, APEX_matrix, targetP signal, yeast mito homolog+, Rickettsial homolog, mito protein domain, induction, coexpression++, MS/MS++	Matrix	Metabolism > Carbohydrate metabolism > Itaconate metabolism | Metabolism > Amino acid metabolism > Branched-chain amino acid metabolism		9	9	8	9	9	9
	P70295	Ancient ubiquitous protein 1	AUP1_MOUSE	Aup1	15369	11858	13179	8642	14724	11562		13468.7	11642.7							8	8	8	8	8	8
	P97477;P97477-2	Aurora kinase A;Isoform 2 of Aurora kinase A	AURKA_MOUSE	Aurka	2798	2674	2914	1822	2857	2498		2795.33	2392.33			mito protein domain				9	10	10	9	9	10
	O70126	Aurora kinase B	AURKB_MOUSE	Aurkb	55971	48040	52270	34922	55853	50470		52093.7	47081.7			mito protein domain				16	16	15	16	15	16
	Q9D9K3	Cell death regulator Aven	AVEN_MOUSE	Aven	4204	3945	3900	3470	3617	3797		4016.33	3628							8	10	9	10	8	10
	Q80U56	Late secretory pathway protein AVL9 homolog	AVL9_MOUSE	Avl9	1533	1645	2719	1254	1373	1470		1965.67	1365.67							7	7	7	6	8	7
	P01887	Beta-2-microglobulin	B2MG_MOUSE	B2m	198271	305397	250494	184122	175936	175910		251387	178656			MS/MS++				7	7	7	7	6	6
	Q91Z92	Beta-1,3-galactosyltransferase 6	B3GT6_MOUSE	B3galt6	1550	1224	1258	889	1348	1118		1344	1118.33			coexpression				5	5	5	5	5	5
	P58158	Galactosylgalactosylxylosylprotein 3-beta-glucuronosyltransferase 3	B3GA3_MOUSE	B3gat3	1914	984	830	639	1258	1949		1242.67	1282							3	2	2	2	3	3
	Q09200	Beta-1,4 N-acetylgalactosaminyltransferase 1	B4GN1_MOUSE	B4galnt1	50896	57038	56710	35582	45597	44948		54881.3	42042.3			targetP signal				21	21	21	21	20	21
	P15535;P15535-2	Beta-1,4-galactosyltransferase 1;Isoform Short of Beta-1,4-galactosyltransferase 1	B4GT1_MOUSE	B4galt1	6115	4564	4184	2907	3551	3764		4954.33	3407.33							6	6	6	6	5	6
	Q9JMK0	Beta-1,4-galactosyltransferase 5	B4GT5_MOUSE	B4galt5	3551	3496	2936	2090	3436	2570		3327.67	2698.67			induction				4	4	4	3	4	5
	Q8R087	Beta-1,4-galactosyltransferase 7	B4GT7_MOUSE	B4galt7	1302	1125	1081	1010	1195	1169		1169.33	1124.67			targetP signal				2	2	2	2	2	2
	Q3UI43	BRISC and BRCA1-A complex member 1	BABA1_MOUSE	Babam1	15080	16354	15842	14138	13406	15893		15758.7	14479			coexpression				9	9	9	9	9	9
	Q8K3W0	BRISC and BRCA1-A complex member 2	BABA2_MOUSE	Babam2	23660	22595	21879	17790	20446	21903		22711.3	20046.3			coexpression				16	15	16	16	15	15
	P97303;P97303-2	Transcription regulator protein BACH2;Isoform 2 of Transcription regulator protein BACH2	BACH2_MOUSE	Bach2	192	332	305	291	255	313		276.333	286.333			mito protein domain				2	2	2	2	2	2
	Q60739	BAG family molecular chaperone regulator 1	BAG1_MOUSE	Bag1	14260	15494	14519	11800	13410	13120		14757.7	12776.7			coexpression				14	14	14	14	14	14
	Q91YN9	BAG family molecular chaperone regulator 2	BAG2_MOUSE	Bag2	6813	5805	4973	4104	4988	4806		5863.67	4632.67			targetP signal, coexpression				4	4	4	4	4	4
	Q8CI61	BAG family molecular chaperone regulator 4	BAG4_MOUSE	Bag4	1331	771	753	644	771	709		951.667	708							3	3	3	3	3	3
	Q8CI32	BAG family molecular chaperone regulator 5	BAG5_MOUSE	Bag5	7307	7518	7422	6154	5543	6945		7415.67	6214			yeast mito homolog				13	14	14	13	12	13
	Q9Z1R2	Large proline-rich protein BAG6	BAG6_MOUSE	Bag6	19134	18941	19048	14096	17213	16327		19041	15878.7			induction				32	31	32	32	32	32
	Q8BKX1;Q8BKX1-2;Q8BKX1-3;Q8BKX1-4	Brain-specific angiogenesis inhibitor 1-associated protein 2;Isoform 2 of Brain-specific angiogenesis inhibitor 1-associated protein 2;Isoform 3 of Brain-specific angiogenesis inhibitor 1-associated protein 2;Isoform 4 of Brain-specific angiogenesis inhibitor 1-associated protein 2	BAIP2_MOUSE	Baiap2	3027	2808	2717	1690	2620	2321		2850.67	2210.33			mito protein domain				11	11	10	10	10	9
	O08734	Bcl-2 homologous antagonist/killer	BAK_MOUSE	Bak1	53585	47383	43903	29094	43804	38898		48290.3	37265.3		MitoCarta3.0	literature, mito protein domain, MS/MS++	MOM	Mitochondrial dynamics and surveillance > Apoptosis		10	10	10	9	10	11
	O54962	Barrier-to-autointegration factor	BAF_MOUSE	Banf1	114227	83208	77230	80022	96526	84431		91555	86993							7	7	6	6	5	6
	Q8VBU8;Q8VBU8-2;Q8VBU8-3;Q8VBU8-4	Protein BANP;Isoform 2 of Protein BANP;Isoform 3 of Protein BANP;Isoform 4 of Protein BANP	BANP_MOUSE	Banp	900	951	852	672	741	773		901	728.667							5	5	5	5	5	5
	Q9DCT6-2	Isoform 2 of Chromatin complexes subunit BAP18	BAP18_MOUSE	Bap18	33642	39085	36905	36844	36254	36725		36544	36607.7							8	8	8	8	8	8
	O70445	BRCA1-associated RING domain protein 1	BARD1_MOUSE	Bard1	87	89	84	60	100	84		86.6667	81.3333			targetP signal, Rickettsial homolog, mito protein domain				2	2	2	2	2	2
	Q91XV3	Brain acid soluble protein 1	BASP1_MOUSE	Basp1	21541	19700	21874	18625	19851	20561		21038.3	19679							9	10	10	12	10	10
	Q07813	Apoptosis regulator BAX	BAX_MOUSE	Bax	101822	109203	104779	97086	100207	100356		105268	99216.3		MitoCarta3.0	literature, mito protein domain, coexpression, MS/MS++	MOM	Mitochondrial dynamics and surveillance > Apoptosis		9	10	10	10	9	10
	O88379	Bromodomain adjacent to zinc finger domain protein 1A	BAZ1A_MOUSE	Baz1a	8004	7689	7876	5673	6986	6971		7856.33	6543.33							43	41	41	42	40	40
	Q9Z277	Tyrosine-protein kinase BAZ1B	BAZ1B_MOUSE	Baz1b	39165	38880	39842	36704	38630	38548		39295.7	37960.7							72	78	74	74	70	74
	Q91YE5;Q91YE5-2;Q91YE5-3	Bromodomain adjacent to zinc finger domain protein 2A;Isoform 2 of Bromodomain adjacent to zinc finger domain protein 2A;Isoform 3 of Bromodomain adjacent to zinc finger domain protein 2A	BAZ2A_MOUSE	Baz2a	927	1209	1203	855	1104	1071		1113	1010							11	11	11	11	11	11
	Q61334	B-cell receptor-associated protein 29	BAP29_MOUSE	Bcap29	15396	14369	13712	12292	14332	13389		14492.3	13337.7							13	12	13	13	12	12
	Q61335	B-cell receptor-associated protein 31	BAP31_MOUSE	Bcap31	63138	64496	64924	52106	68681	58115		64186	59634							16	16	16	16	16	16
	Q9D287	Pre-mRNA-splicing factor SPF27	SPF27_MOUSE	Bcas2	41440	42344	38751	42842	42613	46485		40845	43980							16	17	16	17	16	17
	Q8CCN5	Breast carcinoma-amplified sequence 3 homolog	BCAS3_MOUSE	Bcas3	798	889	787	697	720	885		824.667	767.333							6	8	8	7	7	8
	P24288	Branched-chain-amino-acid aminotransferase, cytosolic	BCAT1_MOUSE	Bcat1	3421	3101	2784	2306	3192	3270		3102	2922.67			targetP signal, yeast mito homolog++, Rickettsial homolog, mito protein domain, MS/MS				9	9	10	11	10	12
	O35855	Branched-chain-amino-acid aminotransferase, mitochondrial	BCAT2_MOUSE	Bcat2	26474	32523	30503	21370	26397	26686		29833.3	24817.7		MitoCarta3.0	literature, APEX_matrix, targetP signal, Rickettsial homolog, mito protein domain, coexpression, MS/MS++	Matrix	Metabolism > Amino acid metabolism > Branched-chain amino acid metabolism		15	17	15	16	16	16
	Q9CWI3	BRCA2 and CDKN1A-interacting protein	BCCIP_MOUSE	Bccip	23193	24072	21943	22236	19640	20402		23069.3	20759.3			coexpression				14	14	14	14	14	14
	P50136	2-oxoisovalerate dehydrogenase subunit alpha, mitochondrial	ODBA_MOUSE	Bckdha	1669	1549	1310	1673	1485	1471		1509.33	1543							5	6	6	6	6	6
	Q6P3A8;Q6P3A8-2	2-oxoisovalerate dehydrogenase subunit beta, mitochondrial;Isoform 2 of 2-oxoisovalerate dehydrogenase subunit beta, mitochondrial	ODBB_MOUSE	Bckdhb	477	392	332	343	275	349		400.333	322.333		MitoCarta3.0	literature, APEX_matrix, yeast mito homolog+, Rickettsial homolog, mito protein domain+, coexpression+, MS/MS++	MIM	Metabolism > Amino acid metabolism > Branched-chain amino acid metabolism | Metabolism > Amino acid metabolism > Branched-chain amino acid dehydrogenase complex		3	3	3	3	3	3
	O55028	[3-methyl-2-oxobutanoate dehydrogenase [lipoamide]] kinase, mitochondrial	BCKD_MOUSE	Bckdk	3903	3196	3012	2903	3308	3110		3370.33	3107		MitoCarta3.0	literature, APEX_matrix, targetP signal, yeast mito homolog+, Rickettsial homolog, mito protein domain+, MS/MS++	Matrix	Metabolism > Amino acid metabolism > Branched-chain amino acid metabolism | Metabolism > Amino acid metabolism > Branched-chain amino acid dehydrogenase complex		9	9	9	9	9	9
	Q9Z0H7	B-cell lymphoma/leukemia 10	BCL10_MOUSE	Bcl10	12999	13040	12154	9622	11124	10875		12731	10540.3			mito protein domain				8	8	8	8	7	8
	Q99PV8;Q99PV8-2	B-cell lymphoma/leukemia 11B;Isoform 2 of B-cell lymphoma/leukemia 11B	BC11B_MOUSE	Bcl11b	5907	7571	7187	6177	5710	5209		6888.33	5698.67							18	18	18	18	18	17
	P10417	Apoptosis regulator Bcl-2	BCL2_MOUSE	Bcl2	28275	30153	30386	39233	20974	22527		29604.7	27578		MitoCarta3.0	literature, mito protein domain	MOM	Mitochondrial dynamics and surveillance > Apoptosis		6	6	6	6	6	6
	Q64373;Q64373-2;Q64373-3;Q64373-4	Bcl-2-like protein 1;Isoform Bcl-X(S) of Bcl-2-like protein 1;Isoform Bcl-X(beta) of Bcl-2-like protein 1;Isoform Bcl-X(delta-TM) of Bcl-2-like protein 1	B2CL1_MOUSE	Bcl2l1	13747	11498	12793	9133	12610	12735		12679.3	11492.7		MitoCarta3.0	literature, mito protein domain	MOM	Mitochondrial dynamics and surveillance > Apoptosis		7	6	7	7	7	7
	O54918	Bcl-2-like protein 11	B2L11_MOUSE	Bcl2l11	13754	13875	12964	12815	12146	12845		13531	12602		MitoCarta3.0	manual, targetP signal	MOM	Mitochondrial dynamics and surveillance > Apoptosis		7	7	7	7	7	7
	P59017	Bcl-2-like protein 13	B2L13_MOUSE	Bcl2l13	10611	9180	10484	8354	11982	8957		10091.7	9764.33		MitoCarta3.0	literature, mito protein domain, coexpression, MS/MS+	MOM	Mitochondrial dynamics and surveillance > Mitophagy | Mitochondrial dynamics and surveillance > Autophagy | Mitochondrial dynamics and surveillance > Apoptosis		12	12	13	12	12	12
	Q921K9	B-cell CLL/lymphoma 7 protein family member B	BCL7B_MOUSE	Bcl7b	15026	15420	14768	12925	14736	13780		15071.3	13813.7							3	3	3	3	3	3
	O08664	B-cell CLL/lymphoma 7 protein family member C	BCL7C_MOUSE	Bcl7c	9993	9957	10178	9098	10719	9765		10042.7	9860.67							3	3	3	3	3	3
	Q8K019;Q8K019-2	Bcl-2-associated transcription factor 1;Isoform 2 of Bcl-2-associated transcription factor 1	BCLF1_MOUSE	Bclaf1	18412	20955	20967	19594	21720	20643		20111.3	20652.3							31	32	33	33	31	32
	Q8CGN4;Q8CGN4-2;Q8CGN4-3;Q8CGN4-4	BCL-6 corepressor;Isoform 2 of BCL-6 corepressor;Isoform 3 of BCL-6 corepressor;Isoform 4 of BCL-6 corepressor	BCOR_MOUSE	Bcor	718	545	600	383	597	242		621	407.333			Rickettsial homolog, mito protein domain				7	7	7	7	7	6
	Q6PAJ1	Breakpoint cluster region protein	BCR_MOUSE	Bcr	386	558	645	355	591	514		529.667	486.667			yeast mito homolog, mito protein domain				10	11	12	12	12	12
	Q9CZP5	Mitochondrial chaperone BCS1	BCS1_MOUSE	Bcs1l	6425	5945	5698	5172	5871	5642		6022.67	5561.67		MitoCarta3.0	literature, APEX_matrix, yeast mito homolog++, Rickettsial homolog, mito protein domain+, coexpression+, MS/MS+	MIM	OXPHOS > Complex III > CIII assembly factors | OXPHOS > OXPHOS assembly factors		8	8	8	8	8	8
	Q80XN0	D-beta-hydroxybutyrate dehydrogenase, mitochondrial	BDH_MOUSE	Bdh1	90317	89178	84129	68769	69474	79252		87874.7	72498.3		MitoCarta3.0	literature, APEX_matrix, targetP signal+, Rickettsial homolog, mito protein domain, induction, coexpression, MS/MS++	MIM	Metabolism > Carbohydrate metabolism > Ketone metabolism		14	13	13	14	14	14
	O88597	Beclin-1	BECN1_MOUSE	Becn1	2752	2139	3363	1669	2648	1758		2751.33	2025							5	4	5	4	5	4
	Q6PAL0	BEN domain-containing protein 3	BEND3_MOUSE	Bend3	31	22	18	14	29	22		23.6667	21.6667							2	2	1	1	3	2
	O35623	BET1 homolog	BET1_MOUSE	Bet1	5303	9473	5591	1868	10883	4309		6789	5686.67							2	2	2	2	2	2
	O35185	Class E basic helix-loop-helix protein 40	BHE40_MOUSE	Bhlhe40	652	506	2193	1519	623	1856		1117	1332.67			mito protein domain				3	4	5	3	3	4
	Q921C5;Q921C5-2	Protein bicaudal D homolog 2;Isoform 2 of Protein bicaudal D homolog 2	BICD2_MOUSE	Bicd2	6967	6518	6639	4368	6467	6029		6708	5621.33							28	27	28	25	27	28
	F8VPZ9	BRD4-interacting chromatin-remodeling complex-associated protein	BICRA_MOUSE	Bicra	129	121	122	97	141	139		124	125.667							4	4	4	4	4	4
	P70444	BH3-interacting domain death agonist	BID_MOUSE	Bid	9437	8120	7184	6277	8351	7043		8247	7223.67		MitoCarta3.0	literature, mito protein domain, coexpression	MOM	Mitochondrial dynamics and surveillance > Apoptosis		6	5	5	6	5	5
	O08539-2	Isoform 2 of Myc box-dependent-interacting protein 1	BIN1_MOUSE	Bin1	60131	61568	59779	46944	57365	55688		60492.7	53332.3			mito protein domain				22	22	21	22	20	22
	D3Z6Q9	Bridging integrator 2	BIN2_MOUSE	Bin2	111744	124943	121213	112322	117826	120790		119300	116979							22	23	22	22	21	23
	Q62210	Baculoviral IAP repeat-containing protein 2	BIRC2_MOUSE	Birc2	1285	1420	1332	1012	1201	1117		1345.67	1110			yeast mito homolog, mito protein domain, MS/MS				3	3	3	3	3	3
	O70201	Baculoviral IAP repeat-containing protein 5	BIRC5_MOUSE	Birc5	11396	12790	9201	18604	11638	12022		11129	14088							7	7	7	7	6	6
	O88738;O88738-2;O88738-3	Baculoviral IAP repeat-containing protein 6;Isoform 2 of Baculoviral IAP repeat-containing protein 6;Isoform 3 of Baculoviral IAP repeat-containing protein 6	BIRC6_MOUSE	Birc6	5948	5594	5643	3969	5150	5146		5728.33	4755							103	102	101	99	100	102
	Q8VD62	UPF0696 protein C11orf68 homolog	CK068_MOUSE	Bles03	12390	11882	12085	11061	11992	11480		12119	11511							8	7	8	7	7	8
	O88700	Bloom syndrome protein homolog	BLM_MOUSE	Blm	122	78	84	67	131	97		94.6667	98.3333			Rickettsial homolog, mito protein domain				4	3	3	3	3	3
	Q8R016	Bleomycin hydrolase	BLMH_MOUSE	Blmh	105770	100952	100121	84585	90351	90649		102281	88528.3			yeast mito homolog				32	32	32	32	29	31
	O55102	Biogenesis of lysosome-related organelles complex 1 subunit 1	BL1S1_MOUSE	Bloc1s1	4751	4907	4583	4270	4392	4274		4747	4312		MitoCarta3.0	mito protein domain, coexpression++, MS/MS	unknown	Signaling		2	2	2	2	2	2
	Q5U5M8	Biogenesis of lysosome-related organelles complex 1 subunit 3	BL1S3_MOUSE	Bloc1s3	1078	676	539	591	881	798		764.333	756.667							2	2	2	2	2	2
	Q8VED2	Biogenesis of lysosome-related organelles complex 1 subunit 4	BL1S4_MOUSE	Bloc1s4	2028	2130	2050	1786	1700	1786		2069.33	1757.33							3	3	3	3	3	3
	Q8R015	Biogenesis of lysosome-related organelles complex 1 subunit 5	BL1S5_MOUSE	Bloc1s5	1556	1907	1658	1746	1618	1570		1707	1644.67			induction, coexpression				3	3	3	3	3	3
	Q9R0C0	Biogenesis of lysosome-related organelles complex 1 subunit 6	BL1S6_MOUSE	Bloc1s6	1557	1233	1059	845	1229	907		1283	993.667							2	2	2	2	2	2
	Q9CY64	Biliverdin reductase A	BIEA_MOUSE	Blvra	92385	90404	89247	66941	80523	79599		90678.7	75687.7							15	17	15	16	14	16
	Q923D2	Flavin reductase (NADPH)	BLVRB_MOUSE	Blvrb	2427	2557	2217	1828	1910	2021		2400.33	1919.67			mito protein domain				3	3	3	2	2	2
	Q91Z96	BMP-2-inducible protein kinase	BMP2K_MOUSE	Bmp2k	1337	1568	1641	1173	2765	1465		1515.33	1801			mito protein domain				11	13	12	14	11	13
	Q6PGF5	BMS1 homolog, ribosome assembly protein (Yeast)	Q6PGF5_MOUSE	Bms1	9377	9789	9080	9235	8480	8901		9415.33	8872			yeast mito homolog				32	35	34	34	32	34
	Q6QD59	Vesicle transport protein SEC20	SEC20_MOUSE	Bnip1	15964	14022	14410	11434	15150	14166		14798.7	13583.3			mito protein domain, coexpression				6	6	7	7	6	6
	O54940	BCL2/adenovirus E1B 19 kDa protein-interacting protein 2	BNIP2_MOUSE	Bnip2	3095	2781	2672	1859	1949	2006		2849.33	1938			mito protein domain, induction				5	5	5	5	5	5
	O55003	BCL2/adenovirus E1B 19 kDa protein-interacting protein 3	BNIP3_MOUSE	Bnip3	18633	18541	16441	76	327	16536		17871.7	5646.33		MitoCarta3.0	literature, mito protein domain+, MS/MS	MOM	Mitochondrial dynamics and surveillance > Apoptosis		2	2	2	1	2	2
	E9Q6J5;E9Q6J5-3	Biorientation of chromosomes in cell division protein 1-like 1;Isoform New of Biorientation of chromosomes in cell division protein 1-like 1	BD1L1_MOUSE	Bod1l	2298	1949	2009	1576	1915	1768		2085.33	1753							31	32	33	32	32	32
	Q9D8S9	BolA-like protein 1	BOLA1_MOUSE	Bola1	34073	35765	35288	28605	35444	31929		35042	31992.7		MitoCarta3.0	GFP, targetP signal+, Rickettsial homolog, mito protein domain, coexpression, MS/MS++	Matrix	Metabolism > Metals and cofactors > Fe-S cluster biosynthesis | Metabolism > Metals and cofactors > Fe-S-containing proteins		7	7	7	7	7	7
	Q8BGS2	BolA-like protein 2	BOLA2_MOUSE	Bola2	68736	63439	62850	44374	66879	59926		65008.3	57059.7			mito protein domain, coexpression				7	7	7	7	7	7
	Q8CEI1	BolA-like protein 3	BOLA3_MOUSE	Bola3	3656	3333	2869	2704	2547	2554		3286	2601.67		MitoCarta3.0	targetP signal, mito protein domain, MS/MS	Matrix	Metabolism > Metals and cofactors > Fe-S cluster biosynthesis | Metabolism > Metals and cofactors > Fe-S-containing proteins		3	3	3	3	2	3
	P97452	Ribosome biogenesis protein BOP1	BOP1_MOUSE	Bop1	32692	34152	32262	29756	30924	29408		33035.3	30029.3			mito protein domain, coexpression				33	32	32	32	32	32
	Q9D920	BLOC-1-related complex subunit 5	BORC5_MOUSE	Borcs5	8656	7301	7801	5041	8852	6890		7919.33	6927.67			targetP signal				3	3	3	3	3	3
	Q8R164	Valacyclovir hydrolase	BPHL_MOUSE	Bphl	945	1127	1119	1284	1227	1132		1063.67	1214.33		MitoCarta3.0	targetP signal, Rickettsial homolog, mito protein domain, coexpression, MS/MS++	Matrix	Metabolism > Detoxification > Xenobiotic metabolism		3	4	4	4	4	4
	Q9Z0S1	3'(2'),5'-bisphosphate nucleotidase 1	BPNT1_MOUSE	Bpnt1	45473	16117	15573	34418	13824	14950		25721	21064			Rickettsial homolog, MS/MS+				14	15	15	14	15	15
	Q80V26	Golgi-resident adenosine 3',5'-bisphosphate 3'-phosphatase	IMPA3_MOUSE	Bpnt2	4155	3825	3372	2761	3014	3079		3784	2951.33			Rickettsial homolog				6	6	6	6	6	6
	A2A654;A2A655;E9Q6A7	Bromodomain PHD finger transcription factor	A2A654_MOUSE;A2A655_MOUSE;E9Q6A7_MOUSE	Bptf	1866	1656	1682	1429	1633	1680		1734.67	1580.67							33	32	32	33	32	32
	Q99MP8;Q99MP8-2	BRCA1-associated protein;Isoform 2 of BRCA1-associated protein	BRAP_MOUSE	Brap	2861	2735	2545	2108	2378	2339		2713.67	2275			mito protein domain				11	11	11	10	11	11
	Q8C3R1	BRCA1-associated ATM activator 1	BRAT1_MOUSE	Brat1	3343	3387	3286	2608	2881	2907		3338.67	2798.67							16	15	16	15	16	15
	P48754	Breast cancer type 1 susceptibility protein homolog	BRCA1_MOUSE	Brca1	452	363	353	251	385	364		389.333	333.333			mito protein domain				9	10	10	10	10	10
	P46737	Lys-63-specific deubiquitinase BRCC36	BRCC3_MOUSE	Brcc3	14332	14060	14830	11746	14186	13954		14407.3	13295.3			yeast mito homolog				13	13	12	12	13	13
	G5E8P1-2	Isoform 2 of Bromodomain-containing protein 1	BRD1_MOUSE	Brd1	1019	1166	1172	1100	955	1059		1119	1038							9	11	11	11	11	11
	Q7JJ13	Bromodomain-containing protein 2	BRD2_MOUSE	Brd2	6585	7183	7351	5956	6750	6823		7039.67	6509.67							21	21	21	20	20	20
	Q8K2F0	Bromodomain-containing protein 3	BRD3_MOUSE	Brd3	3967	4140	3930	4203	4022	3827		4012.33	4017.33							9	9	9	9	9	9
	Q9ESU6	Bromodomain-containing protein 4	BRD4_MOUSE	Brd4	14846	15975	14144	13267	14317	14392		14988.3	13992							28	28	27	28	27	28
	O88665	Bromodomain-containing protein 7	BRD7_MOUSE	Brd7	2163	2281	2161	1890	2252	2055		2201.67	2065.67			induction, coexpression				9	9	9	9	9	9
	Q8R3B7;Q8R3B7-2	Bromodomain-containing protein 8;Isoform 2 of Bromodomain-containing protein 8	BRD8_MOUSE	Brd8	1872	1934	1990	1668	2275	1724		1932	1889			yeast mito homolog				7	8	8	8	8	8
	Q3UQU0	Bromodomain-containing protein 9	BRD9_MOUSE	Brd9	5544	5298	4875	4456	3800	4245		5239	4167							8	11	11	11	10	11
	Q8CFK2	Transcription factor IIIB 90 kDa subunit	TF3B_MOUSE	Brf1	810	696	459	502	500	500		655	500.667							3	4	4	4	3	4
	Q8BXV2	BRI3-binding protein	BRI3B_MOUSE	Bri3bp	13708	13845	14458	10810	15016	13817		14003.7	13214.3			coexpression				3	3	3	3	3	3
	Q5SXJ3	Fanconi anemia group J protein homolog	FANCJ_MOUSE	Brip1	957	767	765	710	824	505		829.667	679.667							9	9	9	9	9	9
	Q9DCA5	Ribosome biogenesis protein BRX1 homolog	BRX1_MOUSE	Brix1	69587	49241	54633	41152	57368	40701		57820.3	46407							16	17	16	16	16	17
	Q99N20	Breast cancer metastasis-suppressor 1 homolog	BRMS1_MOUSE	Brms1	2297	1798	1955	1664	1675	1915		2016.67	1751.33							4	4	4	4	4	4
	Q3U1T3	Breast cancer metastasis-suppressor 1-like protein	BRM1L_MOUSE	Brms1l	811	719	1002	1000	187	908		844	698.333							2	2	2	2	1	2
	Q8K2Q7	BRO1 domain-containing protein BROX	BROX_MOUSE	Brox	13599	12361	13124	10936	12788	12688		13028	12137.3							9	9	9	10	9	9
	B2RRD7	Peregrin	BRPF1_MOUSE	Brpf1	391	321	306	285	301	288		339.333	291.333							3	3	3	3	3	3
	Q921C3;Q921C3-2	Bromodomain and WD repeat-containing protein 1;Isoform B of Bromodomain and WD repeat-containing protein 1	BRWD1_MOUSE	Brwd1	45	34	34	25	36	33		37.6667	31.3333			mito protein domain				2	2	2	2	2	3
	Q9Z2E9	Seipin	BSCL2_MOUSE	Bscl2	9541	298086	116969	414763	197697	268970		141532	293810			coexpression				2	1	1	2	2	2
	Q80Y55	BSD domain-containing protein 1	BSDC1_MOUSE	Bsdc1	437	440	390	136	82	175		422.333	131			coexpression				2	2	2	2	1	2
	P18572;P18572-2	Basigin;Isoform 2 of Basigin	BASI_MOUSE	Bsg	21534	18709	24688	17614	25883	20726		21643.7	21407.7			induction, coexpression				10	10	10	10	10	10
	Q80YW5;Q80YW5-2	B box and SPRY domain-containing protein;Isoform 2 of B box and SPRY domain-containing protein	BSPRY_MOUSE	Bspry	1388	1345	1372	870	1396	1170		1368.33	1145.33			mito protein domain				7	7	7	6	7	7
	Q8R2Q8	Bone marrow stromal antigen 2	BST2_MOUSE	Bst2	1749	366	1675	118	2131	1590		1263.33	1279.67							2	2	4	1	3	3
	E9QAE3	B-TFIID TATA-box-binding protein-associated factor 1	E9QAE3_MOUSE	Btaf1	6097	5023	4909	4248	4609	4607		5343	4488			yeast mito homolog, mito protein domain				44	43	45	44	42	44
	P58544	BTB/POZ domain-containing protein 1	BTBD1_MOUSE	Btbd1	2588	2327	2189	2371	1867	1832		2368	2023.33							3	3	3	3	3	3
	Q8CIF4	Biotinidase	BTD_MOUSE	Btd	1438	1516	1463	1205	1268	1248		1472.33	1240.33			yeast mito homolog, mito protein domain, coexpression				3	3	3	3	3	3
	Q64152	Transcription factor BTF3	BTF3_MOUSE	Btf3	229850	236396	241346	169595	224984	219938		235864	204839							13	13	14	13	13	13
	Q9CQH7	Transcription factor BTF3 homolog 4	BT3L4_MOUSE	Btf3l4	23682	22156	22352	19487	27937	24505		22730	23976.3							9	9	9	9	9	9
	O08901	Mitotic checkpoint serine/threonine-protein kinase BUB1	BUB1_MOUSE	Bub1	513	467	491	387	563	507		490.333	485.667			mito protein domain				6	6	6	6	6	6
	Q9Z1S0	Mitotic checkpoint serine/threonine-protein kinase BUB1 beta	BUB1B_MOUSE	Bub1b	4317	3865	4041	2781	4248	3685		4074.33	3571.33			mito protein domain				22	21	22	21	22	21
	Q9WVA3	Mitotic checkpoint protein BUB3	BUB3_MOUSE	Bub3	130439	133032	133359	125446	132801	130866		132277	129704			mito protein domain				15	15	15	15	15	15
	Q8R149;Q8R149-2	BUD13 homolog;Isoform 2 of BUD13 homolog	BUD13_MOUSE	Bud13	1013	1029	1009	982	1081	996		1017	1019.67							5	5	5	5	5	5
	Q9CY21	Probable 18S rRNA (guanine-N(7))-methyltransferase	BUD23_MOUSE	Bud23	8625	8307	8382	7191	8863	8374		8438	8142.67			mito protein domain				6	6	6	5	6	6
	Q6PGH1	Protein BUD31 homolog	BUD31_MOUSE	Bud31	97758	84239	83805	68756	77976	83792		88600.7	76841.3							13	13	13	13	12	12
	O54825	Bystin	BYST_MOUSE	Bysl	31201	30493	29634	27330	28498	28252		30442.7	28026.7			coexpression				22	22	21	21	22	22
	Q9CQC6	Basic leucine zipper and W2 domain-containing protein 1	BZW1_MOUSE	Bzw1	124519	122166	124529	87423	113158	112214		123738	104265							24	24	24	23	22	25
	Q91VK1	Basic leucine zipper and W2 domain-containing protein 2	BZW2_MOUSE	Bzw2	62659	70116	46145	55317	53535	51075		59640	53309			induction, coexpression				23	23	23	23	22	22
	O35473	Nuclear nucleic acid-binding protein C1D	C1D_MOUSE	C1d	1335	1640	1330	1537	1137	1527		1435	1400.33							2	2	2	2	2	2
	Q9JJ06	Glycoprotein-N-acetylgalactosamine 3-beta-galactosyltransferase 1	C1GLT_MOUSE	C1galt1	2539	2539	2626	1715	2171	2280		2568	2055.33							3	3	3	3	3	3
	Q9JMG2	C1GALT1-specific chaperone 1	C1GLC_MOUSE	C1galt1c1	2580	2350	2322	1362	1873	1902		2417.33	1712.33							5	5	5	5	5	5
	O35658	Complement component 1 Q subcomponent-binding protein, mitochondrial	C1QBP_MOUSE	C1qbp	111308	112888	111253	93272	118622	111504		111816	107799							8	8	8	7	8	9
	Q80X80	Phospholipid transfer protein C2CD2L	C2C2L_MOUSE	C2cd2l	117	111	108	89	81	95		112	88.3333							2	2	2	2	2	2
	Q7TPS5	C2 domain-containing protein 5	C2CD5_MOUSE	C2cd5	1543	1379	1458	1423	1527	1431		1460	1460.33							11	12	12	12	12	11
	P01027	Complement C3	CO3_MOUSE	C3	6816	7741	6382	6744	6556	6035		6979.67	6445			MS/MS++				14	14	14	14	12	14
	P01029	Complement C4-B	CO4B_MOUSE	C4b	496	567	406	428	316	316		489.667	353.333							3	3	3	3	3	3
	P00920	Carbonic anhydrase 2	CAH2_MOUSE	Ca2	3575	3838	4343	1728	4888	3481		3918.67	3365.67			mito protein domain, induction				1	2	2	3	3	2
	Q8VDY9	Caspase activity and apoptosis inhibitor 1	CAAP1_MOUSE	Caap1	605	632	586	506	592	518		607.667	538.667							2	2	2	2	2	2
	Q06138	Calcium-binding protein 39	CAB39_MOUSE	Cab39	57526	54876	57099	37967	47726	47241		56500.3	44311.3			induction				17	16	17	17	17	17
	Q9DB16	Calcium-binding protein 39-like	CB39L_MOUSE	Cab39l	42946	46697	32648	35156	28076	29560		40763.7	30930.7							5	5	5	5	5	5
	Q9CS00	Cactin	CATIN_MOUSE	Cactin	4234	11904	2980	3592	5989	3715		6372.67	4432							11	11	11	10	11	11
	Q8R0X2	CDK2-associated and cullin domain-containing protein 1	CACL1_MOUSE	Cacul1	2851	2917	2802	2312	2177	2526		2856.67	2338.33							6	6	6	6	5	6
	Q9CXW3	Calcyclin-binding protein	CYBP_MOUSE	Cacybp	864214	807493	846846	742756	659286	583678		839518	661907			coexpression				20	20	20	20	21	20
	B2RQC6	CAD protein	PYR1_MOUSE	Cad	107559	106589	102400	88624	96860	100602		105516	95362			yeast mito homolog, Rickettsial homolog, mito protein domain				109	108	106	107	104	107
	Q8VEC4	Calcium homeostasis modulator protein 2	CAHM2_MOUSE	Calhm2	865	557	358	465	335	410		593.333	403.333							2	2	2	2	2	2
	Q8C9E8	Calcium homeostasis modulator protein 6	CAHM6_MOUSE	Calhm6	4693	4000	6964	1324	6364	2947		5219	3545							4	4	4	4	4	4
	P0DP26;P0DP27;P0DP28	Calmodulin-1;Calmodulin-2;Calmodulin-3	CALM1_MOUSE;CALM2_MOUSE;CALM3_MOUSE	Calm1;Calm2;Calm3	166627	145470	130150	98608	172848	131752		147416	134403							13	13	13	12	12	13
	P14211	Calreticulin	CALR_MOUSE	Calr	616897	582693	601585	413893	625748	559354		600392	532998							34	31	32	30	35	33
	O35887	Calumenin	CALU_MOUSE	Calu	52803	55227	56014	37616	59711	51429		54681.3	49585.3			mito protein domain				18	18	18	18	18	18
	Q8BW96;Q8BW96-2	Calcium/calmodulin-dependent protein kinase type 1D;Isoform 2 of Calcium/calmodulin-dependent protein kinase type 1D	KCC1D_MOUSE	Camk1d	5054	5028	4906	4178	4731	4745		4996	4551.33			mito protein domain				10	11	11	11	11	11
	Q6PHZ2	Calcium/calmodulin-dependent protein kinase type II subunit delta	KCC2D_MOUSE	Camk2d	7244	7286	6689	7567	6278	6590		7073	6811.67			mito protein domain				9	9	9	9	9	9
	Q923T9;Q923T9-2	Calcium/calmodulin-dependent protein kinase type II subunit gamma;Isoform 2 of Calcium/calmodulin-dependent protein kinase type II subunit gamma	KCC2G_MOUSE	Camk2g	18931	19752	19301	16026	18074	18344		19328	17481.3			mito protein domain				16	17	16	15	15	16
	P08414	Calcium/calmodulin-dependent protein kinase type IV	KCC4_MOUSE	Camk4	21982	22453	21920	16896	19792	19404		22118.3	18697.3							22	22	21	22	21	22
	Q6ZQ38	Cullin-associated NEDD8-dissociated protein 1	CAND1_MOUSE	Cand1	83289	86911	86309	72716	71422	80918		85503	75018.7							63	62	61	63	60	60
	Q6ZQ73	Cullin-associated NEDD8-dissociated protein 2	CAND2_MOUSE	Cand2	280	177	187	181	180	203		214.667	188							6	5	5	5	5	5
	P35564	Calnexin	CALX_MOUSE	Canx	276565	266941	252520	174337	252213	220522		265342	215691		mito-interacting					46	44	44	41	46	46
	P40124	Adenylyl cyclase-associated protein 1	CAP1_MOUSE	Cap1	879773	840575	839674	581498	823541	762358		853341	722466							41	40	38	38	38	40
	P24452	Macrophage-capping protein	CAPG_MOUSE	Capg	54066	58779	53259	57930	56382	51233		55368	55181.7							10	10	10	10	10	10
	O35350	Calpain-1 catalytic subunit	CAN1_MOUSE	Capn1	95037	96151	90065	68862	80671	82791		93751	77441.3							45	43	44	44	42	44
	O08529	Calpain-2 catalytic subunit	CAN2_MOUSE	Capn2	62719	57468	59847	29785	51452	44861		60011.3	42032.7							39	39	39	38	36	39
	Q9R1S8	Calpain-7	CAN7_MOUSE	Capn7	913	829	794	660	738	769		845.333	722.333							8	8	8	8	8	8
	O88456	Calpain small subunit 1	CPNS1_MOUSE	Capns1	114709	116980	109635	76401	103267	101558		113775	93742			mito protein domain				12	13	12	12	13	12
	Q60865	Caprin-1	CAPR1_MOUSE	Caprin1	41139	39058	45233	27600	44243	37994		41810	36612.3							21	21	19	20	20	21
	P47753	F-actin-capping protein subunit alpha-1	CAZA1_MOUSE	Capza1	545994	564993	558949	417345	481728	497163		556645	465412							17	16	16	18	16	16
	P47754	F-actin-capping protein subunit alpha-2	CAZA2_MOUSE	Capza2	205031	195397	203978	152054	191441	186790		201469	176762							16	16	16	16	15	15
	P47757-2	Isoform 2 of F-actin-capping protein subunit beta	CAPZB_MOUSE	Capzb	782362	755683	756345	557820	731747	696644		764797	662070							28	27	28	27	25	28
	Q8CIS0;Q8CIS0-2	Caspase recruitment domain-containing protein 11;Isoform 2 of Caspase recruitment domain-containing protein 11	CAR11_MOUSE	Card11	7313	7387	7552	5549	6440	6562		7417.33	6183.67			mito protein domain				34	35	36	35	32	34
	Q9D1I2	Caspase recruitment domain-containing protein 19	CAR19_MOUSE	Card19	1612	1155	1205	938	1055	1246		1324	1079.67		mito-interacting	mito protein domain, induction, MS/MS				3	2	2	2	2	2
	E9PWH2	Caspase recruitment domain family, member 6	E9PWH2_MOUSE	Card6	38	61	48	42	11	32		49	28.3333			mito protein domain, induction				3	3	3	3	1	3
	Q9CR86	Calcium-regulated heat stable protein 1	CHSP1_MOUSE	Carhsp1	11960	9902	9037	5096	8816	7832		10299.7	7248			induction				3	3	3	2	3	3
	Q9WVG6;Q9WVG6-2	Histone-arginine methyltransferase CARM1;Isoform 2 of Histone-arginine methyltransferase CARM1	CARM1_MOUSE	Carm1	8863	9939	9610	9218	9519	9681		9470.67	9472.67			mito protein domain+, coexpression				17	18	17	18	16	18
	Q3V3V9	Capping protein, Arp2/3 and myosin-I linker protein 2	CARL2_MOUSE	Carmil2	3435	4528	4263	4026	4082	4159		4075.33	4089							21	21	21	21	21	21
	Q80UY1	Carnosine N-methyltransferase	CARME_MOUSE	Carnmt1	6067	6186	6024	5855	6018	5831		6092.33	5901.33							8	8	8	8	7	8
	Q9ER72;Q9ER72-2	Cysteine--tRNA ligase, cytoplasmic;Isoform 2 of Cysteine--tRNA ligase, cytoplasmic	SYCC_MOUSE	Cars1	15856	14426	15792	8933	14939	13154		15358	12342			Rickettsial homolog, mito protein domain				36	36	35	38	33	35
	Q8BYM8	Probable cysteine--tRNA ligase, mitochondrial	SYCM_MOUSE	Cars2	849	820	760	718	770	835		809.667	774.333		MitoCarta3.0	APEX_matrix, targetP signal+, Rickettsial homolog, mito protein domain, coexpression++, MS/MS	Matrix	Mitochondrial central dogma > Translation > mt-tRNA synthetases		4	4	4	4	4	5
	Q8K3W3	Protein CASC3	CASC3_MOUSE	Casc3	835	977	937	865	1058	960		916.333	961							6	6	6	6	6	6
	P29452	Caspase-1	CASP1_MOUSE	Casp1	7030	6285	5598	6025	5548	5547		6304.33	5706.67			mito protein domain				11	11	11	12	12	11
	P29594	Caspase-2	CASP2_MOUSE	Casp2	5800	5660	4901	5118	4991	5142		5453.67	5083.67			targetP signal+, mito protein domain				15	15	15	15	15	15
	P70677	Caspase-3	CASP3_MOUSE	Casp3	177138	144143	156732	124022	149210	147912		159338	140381		MitoCarta3.0	literature,mito protein domain	IMS	Protein import, sorting and homeostasis > Protein homeostasis > Proteases | Mitochondrial dynamics and surveillance > Apoptosis		21	20	20	20	19	20
	O08738	Caspase-6	CASP6_MOUSE	Casp6	4611	4018	3571	2757	3465	3321		4066.67	3181			mito protein domain, induction				4	5	3	5	3	3
	P97864	Caspase-7	CASP7_MOUSE	Casp7	5598	4505	4128	3023	4660	4083		4743.67	3922			mito protein domain				4	4	4	4	4	4
	O89110	Caspase-8	CASP8_MOUSE	Casp8	66315	59964	60633	47323	55660	55764		62304	52915.7		MitoCarta3.0	literature, mito protein domain	MOM	Protein import, sorting and homeostasis > Protein homeostasis | Mitochondrial dynamics and surveillance > Apoptosis		35	34	35	34	34	34
	Q9WUF3	CASP8-associated protein 2	C8AP2_MOUSE	Casp8ap2	138	106	120	83	153	111		121.333	115.667							3	3	3	3	3	3
	Q8C3Q9	Caspase-9	CASP9_MOUSE	Casp9	1292	1408	1410	894	1193	1115		1370	1067.33		MitoCarta3.0	literature,mito protein domain	IMS	Protein import, sorting and homeostasis > Protein homeostasis > Proteases | Mitochondrial dynamics and surveillance > Apoptosis		4	4	4	4	4	4
	P51125;P51125-2;P51125-3	Calpastatin;Isoform 2 of Calpastatin;Isoform 3 of Calpastatin	ICAL_MOUSE	Cast	26761	27111	25803	20637	26200	23373		26558.3	23403.3							34	34	31	33	30	32
	P24270	Catalase	CATA_MOUSE	Cat	75581	74230	75559	50627	72671	66748		75123.3	63348.7		MitoCarta3.0	yeast mito homolog++, mito protein domain, coexpression	IMS	Metabolism > Detoxification > ROS and glutathione metabolism		27	27	28	28	28	27
	Q08024-2	Isoform 2 of Core-binding factor subunit beta	PEBB_MOUSE	Cbfb	24162	21461	23013	18707	21456	20892		22878.7	20351.7							3	3	2	3	2	3
	Q08024	Core-binding factor subunit beta	PEBB_MOUSE	Cbfb	118911	115666	115307	99713	119069	115975		116628	111586							12	12	11	12	11	12
	P22682	E3 ubiquitin-protein ligase CBL	CBL_MOUSE	Cbl	20489	21333	21665	16297	19294	18522		21162.3	18037.7			mito protein domain				31	31	31	31	30	31
	Q3TTA7	E3 ubiquitin-protein ligase CBL-B	CBLB_MOUSE	Cblb	15559	17307	16735	11892	13746	13374		16533.7	13004			mito protein domain				28	27	28	28	28	28
	Q9JIY2	E3 ubiquitin-protein ligase Hakai	HAKAI_MOUSE	Cbll1	2466	2533	2886	2459	2685	2532		2628.33	2558.67			coexpression				5	6	5	5	5	5
	P48758	Carbonyl reductase [NADPH] 1	CBR1_MOUSE	Cbr1	58533	59551	54643	48090	47138	48988		57575.7	48072			yeast mito homolog, Rickettsial homolog, mito protein domain				18	18	18	18	18	18
	Q91VT4	Carbonyl reductase family member 4	CBR4_MOUSE	Cbr4	8842	9156	7972	8808	7017	7616		8656.67	7813.67		MitoCarta3.0	literature, APEX_matrix, Rickettsial homolog, mito protein domain, induction, coexpression+, MS/MS++	Matrix	Metabolism > Lipid metabolism > Type II fatty acid synthesis		7	7	6	6	6	6
	Q8VEH6	COBW domain-containing protein 1	CBWD1_MOUSE	Cbwd1	19826	20139	18791	8852	10878	11140		19585.3	10290			coexpression				13	13	13	13	13	13
	P83917	Chromobox protein homolog 1	CBX1_MOUSE	Cbx1	37338	34647	33978	36571	36693	37162		35321	36808.7							9	7	7	8	7	8
	P23198	Chromobox protein homolog 3	CBX3_MOUSE	Cbx3	708874	683052	676982	662836	628308	652906		689636	648017							13	10	10	13	10	13
	O55187	E3 SUMO-protein ligase CBX4	CBX4_MOUSE	Cbx4	4486	4079	3962	3693	4200	3760		4175.67	3884.33			yeast mito homolog, coexpression, MS/MS				9	9	9	9	9	9
	Q61686	Chromobox protein homolog 5	CBX5_MOUSE	Cbx5	128099	135262	131656	123541	124044	122612		131672	123399							15	15	15	16	16	16
	Q9QXV1	Chromobox protein homolog 8	CBX8_MOUSE	Cbx8	1973	1972	1945	1829	1711	1823		1963.33	1787.67			yeast mito homolog				4	4	4	4	4	4
	Q8K1A6	Coiled-coil and C2 domain-containing protein 1A	C2D1A_MOUSE	Cc2d1a	3529	3840	3812	2844	3208	3305		3727	3119							9	9	9	9	9	9
	Q8BRN9	Coiled-coil and C2 domain-containing protein 1B	C2D1B_MOUSE	Cc2d1b	15761	16446	15809	13587	14880	14937		16005.3	14468							24	24	24	24	23	24
	Q8CH18	Cell division cycle and apoptosis regulator protein 1	CCAR1_MOUSE	Ccar1	17458	18421	17616	17278	16190	16272		17831.7	16580			mito protein domain				37	37	38	36	36	37
	Q8VDP4	Cell cycle and apoptosis regulator protein 2	CCAR2_MOUSE	Ccar2	27981	30076	30612	26046	26710	25454		29556.3	26070			targetP signal				32	32	32	33	32	33
	Q3TMW1	Coiled-coil domain-containing protein 102A	C102A_MOUSE	Ccdc102a	555	350	480	174	633	413		461.667	406.667							2	2	2	2	2	2
	Q8VE99	Coiled-coil domain-containing protein 115	CC115_MOUSE	Ccdc115	19712	20860	19876	14813	18527	17043		20149.3	16794.3							9	9	9	9	7	8
	Q8R344	Coiled-coil domain-containing protein 12	CCD12_MOUSE	Ccdc12	20154	20116	21341	16906	21322	19855		20537	19361							9	9	9	9	9	9
	Q9D8X2	Coiled-coil domain-containing protein 124	CC124_MOUSE	Ccdc124	32182	28089	28939	19404	30326	27960		29736.7	25896.7			coexpression				10	10	10	10	10	10
	Q3TC33	Coiled-coil domain-containing protein 127	CC127_MOUSE	Ccdc127	531	515	581	569	391	511		542.333	490.333		MitoCarta3.0	APEX_IMS, MS/MS	Membrane			2	3	2	3	2	3
	Q8C7V8;Q8C7V8-2	Coiled-coil domain-containing protein 134;Isoform 2 of Coiled-coil domain-containing protein 134	CC134_MOUSE	Ccdc134	4480	10171	13537	10707	12064	12711		9396	11827.3							4	4	4	4	4	4
	Q8R0K4	Coiled-coil domain-containing protein 137	CC137_MOUSE	Ccdc137	1334	1811	1433	2082	1473	1572		1526	1709			targetP signal				4	4	3	4	4	4
	Q9D162;Q9D162-2;Q9D162-3	Coiled-coil domain-containing protein 167;Isoform 2 of Coiled-coil domain-containing protein 167;Isoform 3 of Coiled-coil domain-containing protein 167	CC167_MOUSE	Ccdc167	6682	6110	5651	4614	6627	5956		6147.67	5732.33							2	2	2	2	2	2
	Q3U155	Coiled-coil domain-containing protein 174	CC174_MOUSE	Ccdc174	423	351	431	217	595	422		401.667	411.333							2	2	2	2	2	2
	Q9JIG7	Coiled-coil domain-containing protein 22	CCD22_MOUSE	Ccdc22	6156	5849	5031	5133	4900	4795		5678.67	4942.67							14	14	14	14	14	14
	Q78PG9	Coiled-coil domain-containing protein 25	CCD25_MOUSE	Ccdc25	19614	16734	17952	11857	14477	14108		18100	13480.7							9	9	9	8	9	9
	Q9CR29	Coiled-coil domain-containing protein 43	CCD43_MOUSE	Ccdc43	3728	3033	3554	3202	3608	2967		3438.33	3259							4	4	4	4	4	4
	Q9D024	Coiled-coil domain-containing protein 47	CCD47_MOUSE	Ccdc47	18627	18792	18059	12822	15626	14614		18492.7	14354							19	21	19	20	18	18
	Q810U5;Q810U5-3	Coiled-coil domain-containing protein 50;Isoform 3 of Coiled-coil domain-containing protein 50	CCD50_MOUSE	Ccdc50	3452	3572	3862	3171	3824	3799		3628.67	3598							7	7	7	7	7	7
	Q3URS9;Q3URS9-2	Mitochondrial potassium channel;Isoform 2 of Mitochondrial potassium channel	MITOK_MOUSE	Ccdc51	3096	3033	2751	2577	2641	2635		2960	2617.67		MitoCarta3.0	APEX_matrix, targetP signal, MS/MS++	MIM	Small molecule transport		9	9	9	9	9	9
	Q8R3Q6	Coiled-coil domain-containing protein 58	CCD58_MOUSE	Ccdc58	17922	19718	18767	16810	19494	17672		18802.3	17992		MitoCarta3.0	APEX_IMS, yeast mito homolog++, mito protein domain+, MS/MS++	IMS			8	8	8	8	8	7
	D3YZP9	Coiled-coil domain-containing protein 6	CCDC6_MOUSE	Ccdc6	7711	7378	5920	6116	7434	6923		7003	6824.33							12	13	13	11	12	13
	Q3UJV1	Coiled-coil domain-containing protein 61	CCD61_MOUSE	Ccdc61	403	379	394	385	352	365		392	367.333							2	2	2	2	2	2
	Q3TCJ8	Coiled-coil domain-containing protein 69	CCD69_MOUSE	Ccdc69	2446	2180	2249	1717	2561	2228		2291.67	2168.67							5	5	5	5	5	5
	E9Q6B2	Coiled-coil domain-containing protein 85C	CC85C_MOUSE	Ccdc85c	225	266	278	230	298	291		256.333	273							2	2	2	2	2	2
	Q9JJ89	Coiled-coil domain-containing protein 86	CCD86_MOUSE	Ccdc86	3230	3195	3607	2933	3849	3504		3344	3428.67							7	8	7	8	7	8
	Q4QRL3	Coiled-coil domain-containing protein 88B	CC88B_MOUSE	Ccdc88b	20645	21082	21305	14929	19264	19073		21010.7	17755.3							61	61	61	61	61	61
	Q6VGS5;Q6VGS5-2	Protein Daple;Isoform 2 of Protein Daple	DAPLE_MOUSE	Ccdc88c	882	768	748	534	796	708		799.333	679.333							16	17	17	15	16	15
	Q8VC31	Coiled-coil domain-containing protein 9	CCDC9_MOUSE	Ccdc9	4284	3095	4538	3732	5080	4585		3972.33	4465.67							8	9	7	9	8	8
	Q8VDN4	Coiled-coil domain-containing protein 92	CCD92_MOUSE	Ccdc92	1154	197	684	822	2133	1308		678.333	1421							2	1	2	2	2	2
	Q7TQK5	Coiled-coil domain-containing protein 93	CCD93_MOUSE	Ccdc93	3924	4126	3922	3404	4203	3991		3990.67	3866							13	13	13	13	13	13
	Q9DBT3	Coiled-coil domain-containing protein 97	CCD97_MOUSE	Ccdc97	4810	4380	4254	1532	4528	4367		4481.33	3475.67							5	5	5	4	5	5
	P14097	C-C motif chemokine 4	CCL4_MOUSE	Ccl4	1501	940	1486	486	2248	718		1309	1150.67							2	2	2	1	3	1
	Q8K2Y9;Q8K2Y9-2	Cerebral cavernous malformations protein 2 homolog;Isoform 2 of Cerebral cavernous malformations protein 2 homolog	CCM2_MOUSE	Ccm2	17164	17047	16182	13018	14720	14515		16797.7	14084.3							18	18	18	17	18	18
	P51943	Cyclin-A2	CCNA2_MOUSE	Ccna2	13483	12111	12855	9979	12928	12514		12816.3	11807							9	9	9	10	8	9
	P24860	G2/mitotic-specific cyclin-B1	CCNB1_MOUSE	Ccnb1	8019	7942	8317	5624	7428	7459		8092.67	6837							13	13	13	13	13	13
	P30276	G2/mitotic-specific cyclin-B2	CCNB2_MOUSE	Ccnb2	4700	4294	4446	3362	3957	3986		4480	3768.33							13	11	13	13	12	13
	Q62447	Cyclin-C	CCNC_MOUSE	Ccnc	3176	3015	2995	1743	2327	2785		3062	2285							4	4	4	4	4	4
	P30280	G1/S-specific cyclin-D2	CCND2_MOUSE	Ccnd2	959	830	922	963	726	681		903.667	790							5	6	6	6	5	5
	P30282	G1/S-specific cyclin-D3	CCND3_MOUSE	Ccnd3	3211	4509	2200	2001	2160	2146		3306.67	2102.33			coexpression				6	6	5	5	6	6
	Q3TVC7;Q3TVC7-3	Cyclin-D1-binding protein 1;Isoform 3 of Cyclin-D1-binding protein 1	CCDB1_MOUSE	Ccndbp1	297	436	381	448	276	408		371.333	377.333			coexpression				1	1	2	2	1	2
	Q61457	G1/S-specific cyclin-E1	CCNE1_MOUSE	Ccne1	1037	853	824	352	960	795		904.667	702.333							2	2	2	1	2	2
	Q61458	Cyclin-H	CCNH_MOUSE	Ccnh	6393	5454	5208	4103	5781	4899		5685	4927.67			yeast mito homolog, coexpression				10	10	10	9	10	10
	O88874	Cyclin-K	CCNK_MOUSE	Ccnk	6542	5515	6062	4896	5673	5095		6039.67	5221.33							11	11	10	10	11	10
	Q52KE7;Q52KE7-2	Cyclin-L1;Isoform 2 of Cyclin-L1	CCNL1_MOUSE	Ccnl1	977	1881	859	1207	741	818		1239	922			targetP signal				4	4	4	4	3	4
	Q9JJA7	Cyclin-L2	CCNL2_MOUSE	Ccnl2	4663	3926	4160	3605	3738	3709		4249.67	3684							7	7	7	7	7	7
	Q9QWV9	Cyclin-T1	CCNT1_MOUSE	Ccnt1	3635	3625	3840	3242	3725	3310		3700	3425.67							16	14	16	14	16	15
	Q8BGU5	Cyclin-Y	CCNY_MOUSE	Ccny	1901	2173	1997	1882	1800	1794		2023.67	1825.33			targetP signal				5	5	5	5	5	5
	P51682	C-C chemokine receptor type 5	CCR5_MOUSE	Ccr5	7681	5526	5490	2264	4807	4009		6232.33	3693.33							4	4	4	3	4	4
	Q9WU84	Copper chaperone for superoxide dismutase	CCS_MOUSE	Ccs	19174	20174	19950	15887	18627	18703		19766	17739			yeast mito homolog, mito protein domain, coexpression				7	7	7	7	7	7
	P80314	T-complex protein 1 subunit beta	TCPB_MOUSE	Cct2	505875	502713	497136	419800	469401	463208		501908	450803			Rickettsial homolog, mito protein domain, coexpression				45	45	43	46	45	44
	P80318	T-complex protein 1 subunit gamma	TCPG_MOUSE	Cct3	474849	498065	482987	411498	427670	446329		485300	428499			targetP signal, Rickettsial homolog, mito protein domain				47	47	47	46	46	46
	P80315	T-complex protein 1 subunit delta	TCPD_MOUSE	Cct4	466716	441582	471909	390509	455821	455404		460069	433911			Rickettsial homolog, mito protein domain				40	38	37	37	37	38
	P80316	T-complex protein 1 subunit epsilon	TCPE_MOUSE	Cct5	303274	304212	296333	247218	275892	276697		301273	266602			Rickettsial homolog, mito protein domain				43	42	41	41	39	43
	P80317	T-complex protein 1 subunit zeta	TCPZ_MOUSE	Cct6a	286032	296500	303840	248674	276271	281398		295457	268781			Rickettsial homolog, mito protein domain				33	32	31	29	30	31
	P80313	T-complex protein 1 subunit eta	TCPH_MOUSE	Cct7	324680	318659	318718	259780	305322	298990		320686	288031			GFP, Rickettsial homolog, mito protein domain				42	41	40	43	39	41
	P42932	T-complex protein 1 subunit theta	TCPQ_MOUSE	Cct8	455594	462211	451122	383216	411813	421574		456309	405534			Rickettsial homolog, mito protein domain				43	44	40	43	41	44
	Q8C1Y8	Vacuolar fusion protein CCZ1 homolog	CCZ1_MOUSE	Ccz1	6192	5100	5290	4635	17028	5688		5527.33	9117							13	12	12	13	13	13
	O88875	CD160 antigen	BY55_MOUSE	Cd160	3741	3384	3105	1339	3250	2911		3410	2500							5	5	5	4	5	5
	P08920	T-cell surface antigen CD2	CD2_MOUSE	Cd2	49120	48406	48372	36642	47166	42049		48632.7	41952.3							10	10	10	10	10	10
	Q8K4F0	CD226 antigen	CD226_MOUSE	Cd226	23739	25624	24058	16064	18704	19589		24473.7	18119							6	6	6	6	6	6
	Q07763	Natural killer cell receptor 2B4	CD244_MOUSE	Cd244	3238	1283	1657	861	4863	1623		2059.33	2449							5	6	6	6	6	6
	P24161	T-cell surface glycoprotein CD3 zeta chain	CD3Z_MOUSE	Cd247	107072	115188	110636	81789	107485	95440		110965	94904.7							12	12	12	12	12	10
	P41272	CD27 antigen	CD27_MOUSE	Cd27	19508	15225	29900	9918	26876	12816		21544.3	16536.7							8	8	8	8	8	8
	P31041	T-cell-specific surface glycoprotein CD28	CD28_MOUSE	Cd28	21384	24199	21248	18599	19292	22111		22277	20000.7							7	7	7	6	6	7
	Q9JLQ0	CD2-associated protein	CD2AP_MOUSE	Cd2ap	4980	5427	5195	5148	4910	5002		5200.67	5020			mito protein domain				17	17	17	17	17	17
	Q9CWK3	CD2 antigen cytoplasmic tail-binding protein 2	CD2B2_MOUSE	Cd2bp2	22669	27608	26188	21998	23440	23547		25488.3	22995			mito protein domain				9	9	9	9	8	9
	Q61470	Leukocyte antigen CD37	CD37_MOUSE	Cd37	3567	3327	3770	2397	3169	8187		3554.67	4584.33							3	3	4	4	4	4
	P04235	T-cell surface glycoprotein CD3 delta chain	CD3D_MOUSE	Cd3d	60130	55799	58160	40486	57952	56981		58029.7	51806.3							4	4	4	4	4	4
	P22646	T-cell surface glycoprotein CD3 epsilon chain	CD3E_MOUSE	Cd3e	112687	108312	109266	83121	106565	98685		110088	96123.7							9	9	9	9	9	9
	P11942	T-cell surface glycoprotein CD3 gamma chain	CD3G_MOUSE	Cd3g	98364	104852	105965	76415	90700	89815		103060	85643.3							9	9	9	10	9	8
	P15379;P15379-10;P15379-11;P15379-2;P15379-3;P15379-4;P15379-5;P15379-6;P15379-7;P15379-8;P15379-9	CD44 antigen;Isoform 8 of CD44 antigen;Isoform 9 of CD44 antigen;Isoform 13 of CD44 antigen;Isoform 12 of CD44 antigen;Isoform 4 of CD44 antigen;Isoform 6 of CD44 antigen;Isoform 7 of CD44 antigen;Isoform 2 of CD44 antigen;Isoform 3 of CD44 antigen;Isoform 5 of CD44 antigen	CD44_MOUSE	Cd44	10368	9971	10655	6887	9143	9068		10331.3	8366							7	7	7	7	7	7
	Q61735	Leukocyte surface antigen CD47	CD47_MOUSE	Cd47	102352	89545	93283	56973	87281	75883		95060	73379							5	5	5	5	5	5
	Q61735-2	Isoform 2 of Leukocyte surface antigen CD47	CD47_MOUSE	Cd47	5131	4780	5351	2820	4424	4092		5087.33	3778.67							3	3	3	3	2	3
	P18181	CD48 antigen	CD48_MOUSE	Cd48	141766	125655	133154	95833	128686	124476		133525	116332							9	9	9	10	10	10
	P13379	T-cell surface glycoprotein CD5	CD5_MOUSE	Cd5	12720	12738	13199	9378	11429	8629		12885.7	9812							13	13	13	13	13	13
	Q61003;Q61003-2	T-cell differentiation antigen CD6;Isoform 2 of T-cell differentiation antigen CD6	CD6_MOUSE	Cd6	4909	4125	4587	3760	3706	3754		4540.33	3740							13	13	13	13	13	13
	P37217	Early activation antigen CD69	CD69_MOUSE	Cd69	5398	5517	4411	1902	3839	2848		5108.67	2863							10	11	11	11	9	9
	P40237	CD82 antigen	CD82_MOUSE	Cd82	9036	8111	7614	6072	7603	8621		8253.67	7432							5	6	5	6	5	6
	Q18PI6;Q18PI6-3	SLAM family member 5;Isoform 3 of SLAM family member 5	SLAF5_MOUSE	Cd84	4786	5219	5097	3843	5075	4951		5034	4623							5	5	5	5	5	5
	P01731	T-cell surface glycoprotein CD8 alpha chain	CD8A_MOUSE	Cd8a	48297	50384	45740	44873	40572	41267		48140.3	42237.3							5	5	5	5	5	4
	P10300	T-cell surface glycoprotein CD8 beta chain	CD8B_MOUSE	Cd8b	170079	167561	157015	147875	147438	155687		164885	150333							11	11	11	11	11	11
	Q3U0X8	T-cell surface protein tactile	TACT_MOUSE	Cd96	1922	1484	1559	1079	1480	1401		1655	1320							4	4	4	4	4	4
	Q8CC12;Q8CC12-2	Codanin-1;Isoform 2 of Codanin-1	CDAN1_MOUSE	Cdan1	2065	2262	2198	1785	1879	1783		2175	1815.67							19	19	19	19	18	19
	Q8CII2	Cell division cycle protein 123 homolog	CD123_MOUSE	Cdc123	14916	13680	14530	8757	13575	12536		14375.3	11622.7			coexpression				11	10	11	10	10	10
	Q8R349	Cell division cycle protein 16 homolog	CDC16_MOUSE	Cdc16	10353	9864	9807	8217	9564	9172		10008	8984.33			mito protein domain				17	17	17	17	17	17
	Q9JJ66	Cell division cycle protein 20 homolog	CDC20_MOUSE	Cdc20	3944	3760	3956	3032	4211	3955		3886.67	3732.67			mito protein domain				11	11	11	11	11	11
	Q8BGZ4	Cell division cycle protein 23 homolog	CDC23_MOUSE	Cdc23	15291	13434	13599	11192	11535	13081		14108	11936			mito protein domain				24	24	24	23	21	24
	Q99JP4	Anaphase-promoting complex subunit CDC26	CDC26_MOUSE	Cdc26	3409	2689	2508	2662	2966	2456		2868.67	2694.67							3	3	3	3	3	3
	A2A6Q5;A2A6Q5-3	Cell division cycle protein 27 homolog;Isoform 3 of Cell division cycle protein 27 homolog	CDC27_MOUSE	Cdc27	3562	3113	3247	2223	3162	3325		3307.33	2903.33			mito protein domain				15	15	15	14	15	15
	Q8CFI2	Ubiquitin-conjugating enzyme E2 R1	UB2R1_MOUSE	Cdc34	16324	13856	15138	8938	15217	12977		15106	12377.3			coexpression				8	8	7	7	7	8
	Q61081	Hsp90 co-chaperone Cdc37	CDC37_MOUSE	Cdc37	129643	137012	135563	109193	131867	119603		134073	120221							17	20	16	18	17	19
	Q9CZP7;Q9CZP7-2;Q9CZP7-3;Q9CZP7-4	Hsp90 co-chaperone Cdc37-like 1;Isoform 2 of Hsp90 co-chaperone Cdc37-like 1;Isoform 3 of Hsp90 co-chaperone Cdc37-like 1;Isoform 4 of Hsp90 co-chaperone Cdc37-like 1	CD37L_MOUSE	Cdc37l1	698	774	482	574	528	671		651.333	591			induction, coexpression				2	2	2	2	2	2
	Q9DC48	Pre-mRNA-processing factor 17	PRP17_MOUSE	Cdc40	19106	19082	20364	13940	19380	15627		19517.3	16315.7			mito protein domain				26	26	27	27	28	27
	P60766	Cell division control protein 42 homolog	CDC42_MOUSE	Cdc42	822952	669323	714883	504361	683464	657302		735719	615042			mito protein domain				10	10	10	10	10	11
	Q8BGH7	CDC42 small effector protein 2	C42S2_MOUSE	Cdc42se2	24244	22391	20481	16055	17691	16695		22372	16813.7			mito protein domain				2	2	2	2	2	2
	Q9Z1X9	Cell division control protein 45 homolog	CDC45_MOUSE	Cdc45	7567	6458	6620	5051	6238	6143		6881.67	5810.67							13	12	13	13	12	13
	Q6A068	Cell division cycle 5-like protein	CDC5L_MOUSE	Cdc5l	43602	45461	46702	43919	44516	43683		45255	44039.3							38	39	37	40	36	38
	Q8JZM7	Parafibromin	CDC73_MOUSE	Cdc73	53220	43346	48457	32395	63409	47469		48341	47757.7							28	28	28	28	28	28
	Q14B71	Cell division cycle-associated protein 2	CDCA2_MOUSE	Cdca2	2112	2055	2329	1504	2401	2166		2165.33	2023.67							18	18	19	19	18	19
	Q99M54	Cell division cycle-associated protein 3	CDCA3_MOUSE	Cdca3	4042	3564	3560	2558	3542	3239		3722	3113			targetP signal				2	2	2	2	2	2
	Q9CPY3	Sororin	CDCA5_MOUSE	Cdca5	7371	6614	6932	5308	7783	6313		6972.33	6468							5	5	5	5	5	5
	Q9D0M2	Cell division cycle-associated protein 7	CDCA7_MOUSE	Cdca7	1320	1265	7565	1099	7572	1029		3383.33	3233.33							4	4	4	4	4	4
	Q922M5	Cell division cycle-associated 7-like protein	CDA7L_MOUSE	Cdca7l	8410	7883	8711	6908	8787	8371		8334.67	8022							14	13	13	15	13	14
	Q8BHX3	Borealin	BOREA_MOUSE	Cdca8	90129	99582	101163	83581	85347	90004		96958	86310.7			targetP signal				13	13	13	13	13	13
	P09803	Cadherin-1	CADH1_MOUSE	Cdh1	810	751	240	344	2707	1270		600.333	1440.33							4	3	1	3	3	3
	Q8VDP6	CDP-diacylglycerol--inositol 3-phosphatidyltransferase	CDIPT_MOUSE	Cdipt	42662	57373	43004	41306	32787	37050		47679.7	37047.7			yeast mito homolog, Rickettsial homolog, mito protein domain				5	5	5	5	5	5
	P11440	Cyclin-dependent kinase 1	CDK1_MOUSE	Cdk1	256585	255272	275510	205355	257821	249642		262456	237606			mito protein domain				20	20	20	19	19	19
	P24788	Cyclin-dependent kinase 11B	CD11B_MOUSE	Cdk11b	19925	20816	19676	18698	19493	19821		20139	19337.3			mito protein domain				22	23	22	23	21	23
	Q14AX6;Q14AX6-3	Cyclin-dependent kinase 12;Isoform 3 of Cyclin-dependent kinase 12	CDK12_MOUSE	Cdk12	1194	1188	1018	928	1037	1165		1133.33	1043.33			mito protein domain				10	9	11	11	10	10
	Q69ZA1	Cyclin-dependent kinase 13	CDK13_MOUSE	Cdk13	1730	1391	1360	1183	1533	1534		1493.67	1416.67			mito protein domain				15	15	15	15	15	15
	Q8K0D0	Cyclin-dependent kinase 17	CDK17_MOUSE	Cdk17	7229	6779	6754	5509	7040	6620		6920.67	6389.67			mito protein domain				14	14	14	14	14	14
	Q8BWD8	Cyclin-dependent kinase 19	CDK19_MOUSE	Cdk19	2925	3327	2216	2877	2664	2894		2822.67	2811.67			mito protein domain				7	7	6	6	7	7
	P97377;P97377-2	Cyclin-dependent kinase 2;Isoform CDK2-alpha of Cyclin-dependent kinase 2	CDK2_MOUSE	Cdk2	58464	56968	57287	44728	55000	51914		57573	50547.3			mito protein domain				16	17	16	16	16	16
	O35207	Cyclin-dependent kinase 2-associated protein 1	CDKA1_MOUSE	Cdk2ap1	7440	6589	5482	5382	6917	5675		6503.67	5991.33							4	4	4	4	4	4
	P30285	Cyclin-dependent kinase 4	CDK4_MOUSE	Cdk4	30634	27319	29671	21962	30742	28901		29208	27201.7			mito protein domain				13	14	13	13	14	13
	P49615	Cyclin-dependent-like kinase 5	CDK5_MOUSE	Cdk5	9133	9323	8839	8544	8648	8383		9098.33	8525			mito protein domain				8	8	8	8	8	8
	Q8BTW8	Mitochondrial tRNA methylthiotransferase CDK5RAP1	CK5P1_MOUSE	Cdk5rap1	887	752	746	658	567	681		795	635.333		MitoCarta3.0	literature,targetP signal, Rickettsial homolog, mito protein domain	Matrix	Mitochondrial central dogma > mtRNA metabolism > mt-tRNA modifications		2	2	2	2	2	2
	Q8K389	CDK5 regulatory subunit-associated protein 2	CK5P2_MOUSE	Cdk5rap2	113	94	105	69	114	99		104	94							2	2	2	2	2	2
	Q99LM2	CDK5 regulatory subunit-associated protein 3	CK5P3_MOUSE	Cdk5rap3	9403	8971	8148	6622	8019	7826		8840.67	7489							17	17	17	17	16	17
	Q64261	Cyclin-dependent kinase 6	CDK6_MOUSE	Cdk6	73498	73321	71217	80629	78681	73382		72678.7	77564			mito protein domain				17	18	18	18	17	18
	Q03147	Cyclin-dependent kinase 7	CDK7_MOUSE	Cdk7	13133	11917	12877	9959	12521	11952		12642.3	11477.3			mito protein domain				12	12	12	11	12	12
	Q99J95	Cyclin-dependent kinase 9	CDK9_MOUSE	Cdk9	13994	13943	13686	11540	12694	12332		13874.3	12188.7			mito protein domain				12	13	13	14	12	12
	Q91WE6;Q91WE6-2	Threonylcarbamoyladenosine tRNA methylthiotransferase;Isoform 2 of Threonylcarbamoyladenosine tRNA methylthiotransferase	CDKAL_MOUSE	Cdkal1	2177	1837	1914	1454	2008	1895		1976	1785.67			Rickettsial homolog, mito protein domain				6	6	6	6	6	6
	P39689	Cyclin-dependent kinase inhibitor 1	CDN1A_MOUSE	Cdkn1a	867	490	354	0	445	578		570.333	341							2	2	1	Filtered	2	3
	P46414	Cyclin-dependent kinase inhibitor 1B	CDN1B_MOUSE	Cdkn1b	7782	8867	7982	8902	7320	7822		8210.33	8014.67							5	5	5	5	5	5
	Q64364	Tumor suppressor ARF	ARF_MOUSE	Cdkn2a	564	483	436	253	349	24		494.333	208.667			targetP signal, mito protein domain				3	3	2	1	2	2
	Q8BI72	CDKN2A-interacting protein	CARF_MOUSE	Cdkn2aip	8840	9268	9160	10029	9148	9025		9089.33	9400.67							22	24	20	25	23	23
	Q60773	Cyclin-dependent kinase 4 inhibitor D	CDN2D_MOUSE	Cdkn2d	672	1585	1311	1276	1345	1261		1189.33	1294			Rickettsial homolog, mito protein domain, induction				2	3	3	3	3	3
	Q99L43	Phosphatidate cytidylyltransferase 2	CDS2_MOUSE	Cds2	10581	10239	10100	9659	9625	11423		10306.7	10235.7			Rickettsial homolog, mito protein domain				8	8	8	8	7	9
	Q4VAA2	Protein CDV3	CDV3_MOUSE	Cdv3	60830	73966	79367	63492	69888	65199		71387.7	66193							18	18	18	18	18	18
	Q9WTK2-2	Isoform 2 of Chromodomain Y-like protein	CDYL_MOUSE	Cdyl	1798	1657	1469	1599	1757	1577		1641.33	1644.33			mito protein domain				8	8	7	8	7	8
	Q9D5D8	Chromodomain Y-like protein 2	CDYL2_MOUSE	Cdyl2	747	598	585	561	553	532		643.333	548.667			mito protein domain				2	2	2	2	2	2
	P53569	CCAAT/enhancer-binding protein zeta	CEBPZ_MOUSE	Cebpz	8337	8359	8840	7579	7822	7593		8512	7664.67			coexpression				30	32	32	31	30	31
	Q8BTE5	Protein CEBPZOS	CEBOS_MOUSE	Cebpzos	3132	2787	2935	2264	2531	2659		2951.33	2484.67		MitoCarta3.0	coexpression+, MS/MS+	unknown			2	2	2	2	2	2
	P28659-4	Isoform 4 of CUGBP Elav-like family member 1	CELF1_MOUSE	Celf1	23817	29063	26592	25104	19359	23300		26490.7	22587.7			mito protein domain, coexpression				15	14	13	13	13	14
	Q9Z0H4-11	Isoform 11 of CUGBP Elav-like family member 2	CELF2_MOUSE	Celf2	82837	88014	85613	77200	76067	79907		85488	77724.7			mito protein domain				16	16	15	16	15	15
	Q5FWI3	Cell surface hyaluronidase	CEIP2_MOUSE	Cemip2	209	198	106	146	257	223		171	208.667			induction				5	5	4	5	5	5
	O35216	Histone H3-like centromeric protein A	CENPA_MOUSE	Cenpa	10497	11644	11139	11585	10202	10992		11093.3	10926.3							2	2	2	2	2	2
	P49452	Centromere protein C	CENPC_MOUSE	Cenpc	4585	4266	3836	4236	3785	4153		4229	4058			targetP signal				22	22	21	22	18	21
	Q6RT24	Centromere-associated protein E	CENPE_MOUSE	Cenpe	1161	1324	1321	724	804	1108		1268.67	878.667			mito protein domain				14	14	13	14	13	13
	E9Q3P4	Centromere protein F	E9Q3P4_MOUSE	Cenpf	363	290	316	211	353	301		323	288.333			induction, MS/MS				13	14	14	13	13	14
	Q9QYM8	Centromere protein H	CENPH_MOUSE	Cenph	3810	4038	3663	3402	3547	3616		3837	3521.67							5	5	5	5	6	5
	Q8K1K4	Centromere protein I	CENPI_MOUSE	Cenpi	463	426	426	400	426	385		438.333	403.667			targetP signal				4	4	4	4	4	4
	Q9ESN5	Centromere protein K	CENPK_MOUSE	Cenpk	1399	694	780	513	1276	941		957.667	910							3	3	3	3	3	3
	Q3U3S3	Centromere protein L	CENPL_MOUSE	Cenpl	1044	769	693	1025	925	854		835.333	934.667							5	4	4	5	5	5
	Q9CQA0	Centromere protein M	CENPM_MOUSE	Cenpm	1983	1392	1343	1052	1600	1783		1572.67	1478.33							3	3	3	3	3	3
	Q9CZ92	Centromere protein P	CENPP_MOUSE	Cenpp	1351	1672	1332	1351	1451	1536		1451.67	1446							3	3	3	3	3	3
	Q9CPQ5	Centromere protein Q	CENPQ_MOUSE	Cenpq	1671	1605	1582	1682	1857	1639		1619.33	1726							3	3	3	3	3	3
	Q9D084	Centromere protein S	CENPS_MOUSE	Cenps	2078	1749	1995	1711	2478	1874		1940.67	2021							2	2	2	2	2	2
	Q3TJM4	Centromere protein T	CENPT_MOUSE	Cenpt	816	377	702	832	871	754		631.667	819							2	2	2	2	2	2
	Q8C4M7	Centromere protein U	CENPU_MOUSE	Cenpu	1190	1134	1100	1098	985	1014		1141.33	1032.33							4	4	4	4	4	4
	Q9CXS4	Centromere protein V	CENPV_MOUSE	Cenpv	11192	11736	11737	13038	10877	11348		11555	11754.3			targetP signal				9	9	9	9	9	9
	Q7TSG1;Q7TSG1-2	Centrosomal protein of 120 kDa;Isoform 2 of Centrosomal protein of 120 kDa	CE120_MOUSE	Cep120	1193	999	1011	758	1058	1017		1067.67	944.333							3	3	3	3	3	3
	Q8BI22;Q8BI22-2	Centrosomal protein of 128 kDa;Isoform 2 of Centrosomal protein of 128 kDa	CE128_MOUSE	Cep128	106	63	56	64	80	78		75	74							2	2	2	2	2	2
	Q6P5D4	Centrosomal protein of 135 kDa	CP135_MOUSE	Cep135	74	48	96	29	59	61		72.6667	49.6667							2	2	2	2	1	2
	A2AUM9	Centrosomal protein of 152 kDa	CE152_MOUSE	Cep152	491	518	495	434	519	436		501.333	463							8	9	9	9	9	9
	Q6A065	Centrosomal protein of 170 kDa	CE170_MOUSE	Cep170	562	531	541	370	664	538		544.667	524			targetP signal, mito protein domain				11	11	10	10	11	11
	E9Q4Y4	Centrosomal protein 192	E9Q4Y4_MOUSE	Cep192	776	804	747	706	694	679		775.667	693							15	16	16	15	14	15
	Q60952	Centrosome-associated protein CEP250	CP250_MOUSE	Cep250	2095	1771	1752	1373	1845	1569		1872.67	1595.67							30	28	29	30	29	29
	Q99NF3	Centrosomal protein of 41 kDa	CEP41_MOUSE	Cep41	1276	1359	1372	1110	1232	1240		1335.67	1194			targetP signal, mito protein domain				6	6	6	6	6	6
	Q66JX5;Q66JX5-2	Centrosomal protein 43;Isoform 2 of Centrosomal protein 43	CEP43_MOUSE	Cep43	1459	2033	2044	1511	1654	1945		1845.33	1703.33							4	5	4	4	3	5
	Q8BT07	Centrosomal protein of 55 kDa	CEP55_MOUSE	Cep55	20478	20544	20693	14862	19637	20380		20571.7	18293							19	19	19	19	18	19
	Q8CEE0;Q8CEE0-2	Centrosomal protein of 57 kDa;Isoform 2 of Centrosomal protein of 57 kDa	CEP57_MOUSE	Cep57	2935	3240	3228	2774	3077	3071		3134.33	2974							4	4	4	4	5	5
	Q3UPP8;Q3UPP8-3	Centrosomal protein of 63 kDa;Isoform 3 of Centrosomal protein of 63 kDa	CEP63_MOUSE	Cep63	2092	2095	2367	1630	2826	2164		2184.67	2206.67							2	3	3	3	2	2
	Q0VEJ0	Centrosomal protein of 76 kDa	CEP76_MOUSE	Cep76	287	397	434	333	328	373		372.667	344.667							3	3	3	3	3	3
	Q8BMK0	Centrosomal protein of 85 kDa	CEP85_MOUSE	Cep85	1339	661	1337	1112	1038	1134		1112.33	1094.67							4	4	5	5	4	4
	Q9CZ62	Centrosomal protein of 97 kDa	CEP97_MOUSE	Cep97	3409	3299	3240	2866	3329	3075		3316	3090			yeast mito homolog, mito protein domain				15	17	16	17	14	16
	Q8BGS7;Q8BGS7-2	Choline/ethanolaminephosphotransferase 1;Isoform 2 of Choline/ethanolaminephosphotransferase 1	CEPT1_MOUSE	Cept1	8163	10294	9716	8819	6972	7711		9391	7834			yeast mito homolog, Rickettsial homolog, mito protein domain				3	3	3	3	3	3
	Q924Z4	Ceramide synthase 2	CERS2_MOUSE	Cers2	10853	10942	10187	7988	9512	9185		10660.7	8895							7	7	7	7	6	7
	Q9D6J1	Ceramide synthase 4	CERS4_MOUSE	Cers4	865	778	832	469	341	674		825	494.667							2	2	2	2	1	2
	Q9D6K9	Ceramide synthase 5	CERS5_MOUSE	Cers5	3430	2955	2648	1872	2115	1986		3011	1991							9	9	8	8	8	6
	Q9EQG9	Ceramide transfer protein	CERT_MOUSE	Cert1	18921	18123	17140	12335	17313	15160		18061.3	14936			mito protein domain				28	28	29	27	29	26
	Q9R1K9	Centrin-2	CETN2_MOUSE	Cetn2	22001	20001	18685	16315	18706	16455		20229	17158.7			mito protein domain				9	8	9	9	8	9
	O35648	Centrin-3	CETN3_MOUSE	Cetn3	6152	6486	6353	4887	5598	6209		6330.33	5564.67			mito protein domain				3	3	3	3	3	3
	Q8BTU1	Cilia- and flagella-associated protein 20	CFA20_MOUSE	Cfap20	16628	16605	16818	15636	15631	15187		16683.7	15484.7			MS/MS				8	8	8	8	8	8
	Q8C6E0	Cilia- and flagella-associated protein 36	CFA36_MOUSE	Cfap36	3139	2681	2463	2130	3194	2233		2761	2519			mito protein domain				5	5	5	5	5	5
	O88271	Craniofacial development protein 1	CFDP1_MOUSE	Cfdp1	21484	20674	22332	18524	25087	21388		21496.7	21666.3							11	12	11	12	12	12
	P18760	Cofilin-1	COF1_MOUSE	Cfl1	8553921	7184977	7752014	5486440	8003221	7289919		7830304	6.92653e+06							28	28	27	29	27	28
	Q8C6L5	Cyclic GMP-AMP synthase	CGAS_MOUSE	Cgas	5710	5679	5608	4405	5847	5474		5665.67	5242			mito protein domain				12	12	12	12	12	12
	Q8BHG9	CGG triplet repeat-binding protein 1	CGBP1_MOUSE	Cggbp1	63957	64674	66806	56998	61008	59015		65145.7	59007							11	11	11	11	11	11
	Q9QWF0	Chromatin assembly factor 1 subunit A	CAF1A_MOUSE	Chaf1a	8158	7741	7217	6222	7412	6725		7705.33	6786.33							20	20	19	20	20	19
	Q9D0N7	Chromatin assembly factor 1 subunit B	CAF1B_MOUSE	Chaf1b	34730	25992	28809	19068	30295	10361		29843.7	19908			mito protein domain				15	15	15	15	14	15
	Q8K327	Chromosome alignment-maintaining phosphoprotein 1	CHAP1_MOUSE	Champ1	3136	3246	3320	3271	3371	3292		3234	3311.33							14	14	14	14	13	14
	Q9CQA6	Coiled-coil-helix-coiled-coil-helix domain-containing protein 1	CHCH1_MOUSE	Chchd1	4924	5248	5524	4823	5461	5342		5232	5208.67		MitoCarta3.0	GFP, targetP signal, yeast mito homolog++, mito protein domain, coexpression+, MS/MS	MIM	Mitochondrial central dogma > Translation > Mitochondrial ribosome		2	2	2	2	2	2
	Q9CRB9	MICOS complex subunit Mic19	MIC19_MOUSE	Chchd3	38311	41969	40822	33860	42238	39781		40367.3	38626.3		MitoCarta3.0	literature, APEX_IMS, APEX_matrix, GFP, Rickettsial homolog, induction, coexpression++, MS/MS++	MIM	Mitochondrial dynamics and surveillance > Cristae formation > MICOS complex | Mitochondrial dynamics and surveillance > Intramitochondrial membrane interactions		13	13	14	14	13	14
	Q8VEA4	Mitochondrial intermembrane space import and assembly protein 40	MIA40_MOUSE	Chchd4	12321	12762	14062	12068	13428	10123		13048.3	11873		MitoCarta3.0	literature, APEX_IMS, yeast mito homolog++, mito protein domain, induction, coexpression, MS/MS+	IMS	Protein import, sorting and homeostasis > Protein import and sorting > MIA40		3	3	3	3	3	3
	Q91VN4	MICOS complex subunit Mic25	MIC25_MOUSE	Chchd6	1827	2365	1993	1979	2297	2461		2061.67	2245.67		MitoCarta3.0	literature, APEX_IMS, APEX_matrix, yeast mito homolog, coexpression, MS/MS++	MIM	Mitochondrial dynamics and surveillance > Cristae formation > MICOS complex		7	7	7	7	7	7
	P40201	Chromodomain-helicase-DNA-binding protein 1	CHD1_MOUSE	Chd1	2964	2963	2845	2606	2692	2602		2924	2633.33			yeast mito homolog, mito protein domain				25	26	26	26	26	26
	Q9CXF7	Chromodomain-helicase-DNA-binding protein 1-like	CHD1L_MOUSE	Chd1l	3410	3556	3250	3408	3151	3007		3405.33	3188.67			mito protein domain				16	16	16	16	15	15
	E9PZM4	Chromodomain-helicase-DNA-binding protein 2	CHD2_MOUSE	Chd2	1295	1342	1216	1122	1115	1110		1284.33	1115.67			yeast mito homolog, mito protein domain				11	11	11	10	9	10
	B1AR17	Chromodomain helicase DNA-binding protein 3	B1AR17_MOUSE	Chd3	15088	14651	14187	12672	13017	13064		14642	12917.7			yeast mito homolog, mito protein domain				32	31	31	33	30	31
	Q6PDQ2	Chromodomain-helicase-DNA-binding protein 4	CHD4_MOUSE	Chd4	47756	47164	47165	39004	48248	42788		47361.7	43346.7			yeast mito homolog, mito protein domain				86	86	84	86	83	84
	A2AJK6	Chromodomain-helicase-DNA-binding protein 7	CHD7_MOUSE	Chd7	2670	1975	311	1745	1978	1933		1652	1885.33			yeast mito homolog, mito protein domain				13	13	11	13	11	14
	Q09XV5	Chromodomain-helicase-DNA-binding protein 8	CHD8_MOUSE	Chd8	3257	3502	3412	2794	3282	3041		3390.33	3039			yeast mito homolog, mito protein domain				34	37	36	35	36	37
	O35280;O35280-2	Serine/threonine-protein kinase Chk1;Isoform 2 of Serine/threonine-protein kinase Chk1	CHK1_MOUSE	Chek1	3616	3598	4015	3123	3813	3794		3743	3576.67			mito protein domain				10	10	10	10	10	10
	Q8CGZ0	Calcium homeostasis endoplasmic reticulum protein	CHERP_MOUSE	Cherp	33454	27036	35253	35256	25317	32230		31914.3	30934.3							26	26	26	25	25	25
	Q810L3;Q810L3-2;Q810L3-3;Q810L3-4	E3 ubiquitin-protein ligase CHFR;Isoform 2 of E3 ubiquitin-protein ligase CHFR;Isoform 3 of E3 ubiquitin-protein ligase CHFR;Isoform 4 of E3 ubiquitin-protein ligase CHFR	CHFR_MOUSE	Chfr	508	389	445	303	407	401		447.333	370.333			mito protein domain				2	2	2	2	2	2
	Q922Q9	Chitinase domain-containing protein 1	CHID1_MOUSE	Chid1	1908	1650	1893	1220	1127	1160		1817	1169							6	7	7	7	6	7
	Q9QXG2	Rab proteins geranylgeranyltransferase component A 1	RAE1_MOUSE	Chm	5445	5457	4416	3039	4659	4552		5106	4083.33							16	16	15	16	16	14
	Q921W0	Charged multivesicular body protein 1a	CHM1A_MOUSE	Chmp1a	19021	21534	21120	16622	18077	17906		20558.3	17535			induction				6	6	6	6	6	6
	Q99LU0	Charged multivesicular body protein 1b-1	CH1B1_MOUSE	Chmp1b1	13864	16571	16057	14564	14359	15093		15497.3	14672							3	3	3	3	3	3
	Q9DB34	Charged multivesicular body protein 2a	CHM2A_MOUSE	Chmp2a	28457	31215	34212	26266	29499	28589		31294.7	28118							8	8	8	8	8	8
	Q8BJF9	Charged multivesicular body protein 2b	CHM2B_MOUSE	Chmp2b	1560	1671	1432	1466	2157	1833		1554.33	1818.67							2	2	2	2	2	2
	Q9CQ10	Charged multivesicular body protein 3	CHMP3_MOUSE	Chmp3	12983	12487	11891	10225	10823	10988		12453.7	10678.7							5	5	4	5	5	5
	Q9D8B3	Charged multivesicular body protein 4b	CHM4B_MOUSE	Chmp4b	71440	76514	78592	58167	76900	69403		75515.3	68156.7			induction				12	12	12	11	12	12
	Q9D7S9	Charged multivesicular body protein 5	CHMP5_MOUSE	Chmp5	14266	13609	13276	9685	12801	12008		13717	11498							6	6	6	5	5	5
	P0C0A3	Charged multivesicular body protein 6	CHMP6_MOUSE	Chmp6	3794	6578	6890	4553	6756	3981		5754	5096.67			targetP signal				3	3	3	3	3	3
	Q8R1T1	Charged multivesicular body protein 7	CHMP7_MOUSE	Chmp7	2933	3693	2578	3462	3243	2860		3068	3188.33			induction, coexpression				10	12	12	13	11	12
	Q9D1P4	Cysteine and histidine-rich domain-containing protein 1	CHRD1_MOUSE	Chordc1	99870	99190	96437	70338	82886	84740		98499	79321.3			coexpression				18	18	18	18	17	18
	P61022	Calcineurin B homologous protein 1	CHP1_MOUSE	Chp1	5924	6147	5632	5066	5177	5144		5901	5129			mito protein domain, coexpression, MS/MS				7	8	7	8	6	7
	Q9JKP8	Chromatin accessibility complex protein 1	CHRC1_MOUSE	Chrac1	13617	14594	14431	12449	11985	13731		14214	12721.7							5	5	5	5	4	5
	Q99LL3	Carbohydrate sulfotransferase 12	CHSTC_MOUSE	Chst12	23126	17902	16042	14886	451	14883		19023.3	10073.3							2	2	2	2	2	2
	Q6ZQ11	Chondroitin sulfate synthase 1	CHSS1_MOUSE	Chsy1	972	1650	1623	1928	2183	2009		1415	2040							5	5	6	6	6	6
	Q8BIW9	Chromosome transmission fidelity protein 18 homolog	CTF18_MOUSE	Chtf18	6344	5874	5574	5456	5637	5406		5930.67	5499.67			yeast mito homolog, mito protein domain				24	26	23	26	25	25
	P0CG15	Chromosome transmission fidelity protein 8 homolog	CTF8_MOUSE	Chtf8	5414	5263	4725	5628	5244	5574		5134	5482							3	3	3	3	3	3
	Q9CY57;Q9CY57-2;Q9CY57-3;Q9CY57-4;Q9CY57-5	Chromatin target of PRMT1 protein;Isoform 2 of Chromatin target of PRMT1 protein;Isoform 3 of Chromatin target of PRMT1 protein;Isoform 4 of Chromatin target of PRMT1 protein;Isoform 5 of Chromatin target of PRMT1 protein	CHTOP_MOUSE	Chtop	31251	36379	36911	36706	35326	35379		34847	35803.7			targetP signal				5	5	5	5	5	5
	Q60680	Inhibitor of nuclear factor kappa-B kinase subunit alpha	IKKA_MOUSE	Chuk	3478	3273	3148	2484	2564	2786		3299.67	2611.33							13	13	14	12	13	14
	Q6DG52	Protein Churchill	CHUR_MOUSE	Churc1	27939	30648	32445	15709	28000	24281		30344	22663.3			coexpression+				5	4	4	4	4	5
	Q99KN2	Probable cytosolic iron-sulfur protein assembly protein CIAO1	CIAO1_MOUSE	Ciao1	10590	9958	10341	7417	9133	10694		10296.3	9081.33			mito protein domain, induction, coexpression				12	13	13	13	12	13
	Q9DCL2	Cytosolic iron-sulfur assembly component 2A	CIA2A_MOUSE	Ciao2a	4558	5086	4893	3867	3759	4297		4845.67	3974.33			induction				3	3	3	3	3	3
	Q9D187	Cytosolic iron-sulfur assembly component 2B	CIA2B_MOUSE	Ciao2b	4369	3952	3207	3091	4281	4475		3842.67	3949			coexpression				4	4	3	4	3	4
	Q7TMW6;Q7TMW6-2	Cytosolic iron-sulfur assembly component 3;Isoform 2 of Cytosolic iron-sulfur assembly component 3	CIAO3_MOUSE	Ciao3	2356	1914	4350	1382	1787	1514		2873.33	1561			induction, coexpression+				7	7	7	7	7	7
	Q8WTY4	Anamorsin	CPIN1_MOUSE	Ciapin1	24627	22128	22791	17365	22741	21305		23182	20470.3			yeast mito homolog, mito protein domain				10	10	11	11	10	10
	Q9Z0F4	Calcium and integrin-binding protein 1	CIB1_MOUSE	Cib1	6441	5100	4771	4306	5715	5452		5437.33	5157.67			mito protein domain				4	4	4	4	4	4
	Q924A2	Protein capicua homolog	CIC_MOUSE	Cic	636	527	478	452	450	484		547	462			targetP signal, mito protein domain				9	9	8	9	9	9
	Q9D0V8;Q9D0V8-2;Q9D0V8-3	Cyclin-dependent kinase 2-interacting protein;Isoform 2 of Cyclin-dependent kinase 2-interacting protein;Isoform 3 of Cyclin-dependent kinase 2-interacting protein	CINP_MOUSE	Cinp	329	388	359	303	379	407		358.667	363			coexpression				2	2	2	2	2	2
	Q8BWY9	Protein CIP2A	CIP2A_MOUSE	Cip2a	18320	16137	17319	12579	14036	16499		17258.7	14371.3							35	35	35	35	34	35
	P60824	Cold-inducible RNA-binding protein	CIRBP_MOUSE	Cirbp	42285	39557	37160	32144	41847	39928		39667.3	37973			yeast mito homolog, mito protein domain				6	6	5	6	6	6
	Q91WS0	CDGSH iron-sulfur domain-containing protein 1	CISD1_MOUSE	Cisd1	119333	104817	107837	84041	101720	100075		110662	95278.7		MitoCarta3.0	literature, mito protein domain, induction, coexpression++, MS/MS++	MOM	Metabolism > Metals and cofactors > Fe-S cluster biosynthesis | Metabolism > Metals and cofactors > Fe-S-containing proteins		7	8	7	7	7	7
	Q9CQB5	CDGSH iron-sulfur domain-containing protein 2	CISD2_MOUSE	Cisd2	46928	48896	49317	39110	42550	43045		48380.3	41568.3		mito-interacting	literature, mito protein domain, induction, coexpression				7	7	7	7	7	7
	B1AR13	CDGSH iron-sulfur domain-containing protein 3, mitochondrial	CISD3_MOUSE	Cisd3	2182	2676	2531	1788	2950	2886		2463	2541.33		MitoCarta3.0	APEX_matrix, mito protein domain, coexpression, MS/MS++	Matrix	Metabolism > Metals and cofactors > Fe-S cluster biosynthesis | Metabolism > Metals and cofactors > Fe-S-containing proteins		4	4	4	4	4	4
	Q62225	Cytokine-inducible SH2-containing protein	CISH_MOUSE	Cish	2559	2564	2720	1654	2273	2363		2614.33	2096.67			mito protein domain				6	6	6	6	6	6
	P49025-5	Isoform 5 of Citron Rho-interacting kinase	CTRO_MOUSE	Cit	3975	3938	4003	2540	4104	3479		3972	3374.33			targetP signal, mito protein domain				44	44	45	43	43	45
	Q8VEH2	CDKN1A-interacting zinc finger protein 1	Q8VEH2_MOUSE	Ciz1	976	1424	1450	1318	1757	1473		1283.33	1516							5	7	6	7	7	6
	Q3V1H1	Cytoskeleton-associated protein 2	CKAP2_MOUSE	Ckap2	2823	2431	2517	1762	2743	2347		2590.33	2284			targetP signal				14	14	14	14	14	14
	Q7TS74;Q7TS74-2	Cytoskeleton-associated protein 2-like;Isoform 2 of Cytoskeleton-associated protein 2-like	CKP2L_MOUSE	Ckap2l	282	389	332	405	357	506		334.333	422.667							3	4	3	4	3	4
	A2AGT5;A2AGT5-3	Cytoskeleton-associated protein 5;Isoform 3 of Cytoskeleton-associated protein 5	CKAP5_MOUSE	Ckap5	32507	30445	30824	21521	32316	30837		31258.7	28224.7							104	100	100	99	96	96
	Q04447	Creatine kinase B-type	KCRB_MOUSE	Ckb	4630	3269	3784	2345	3164	2765		3894.33	2758			mito protein domain, induction				7	7	7	7	5	7
	P61025	Cyclin-dependent kinases regulatory subunit 1	CKS1_MOUSE	Cks1b	10585	9574	10555	4202	8912	7587		10238	6900.33							3	3	3	3	3	3
	P56390	Cyclin-dependent kinases regulatory subunit 2	CKS2_MOUSE	Cks2	10386	9463	9797	5046	9786	7946		9882	7592.67							2	2	2	2	2	2
	Q80TV8;Q80TV8-2	CLIP-associating protein 1;Isoform 2 of CLIP-associating protein 1	CLAP1_MOUSE	Clasp1	3758	3754	3700	2865	3587	3483		3737.33	3311.67							30	33	33	32	31	31
	Q8BRT1-5	Isoform 2 of CLIP-associating protein 2	CLAP2_MOUSE	Clasp2	2576	2260	2178	1540	1957	2151		2338	1882.67			targetP signal				7	7	7	7	7	6
	Q8BRT1	CLIP-associating protein 2	CLAP2_MOUSE	Clasp2	9014	8581	8885	6906	8258	8111		8826.67	7758.33			targetP signal				38	38	38	38	38	38
	Q8CFC7;Q8CFC7-2;Q8CFC7-3	CLK4-associating serine/arginine rich protein;Isoform 2 of CLK4-associating serine/arginine rich protein;Isoform 3 of CLK4-associating serine/arginine rich protein	CLASR_MOUSE	Clasrp	208	239	287	251	285	262		244.667	266							2	2	2	2	2	2
	Q99LI2	Chloride channel CLIC-like protein 1	CLCC1_MOUSE	Clcc1	5549	5897	6114	4430	5476	5525		5853.33	5143.67			coexpression				12	12	12	11	12	12
	P51791;P51791-2	H(+)/Cl(-) exchange transporter 3;Isoform 2 of H(+)/Cl(-) exchange transporter 3	CLCN3_MOUSE	Clcn3	1431	873	1262	627	1163	1062		1188.67	950.667			mito protein domain				6	5	6	5	5	6
	Q9WVD4	H(+)/Cl(-) exchange transporter 5	CLCN5_MOUSE	Clcn5	689	462	542	324	512	481		564.333	439			mito protein domain				2	2	2	2	2	2
	Q9CQX5	Claudin domain-containing protein 1	CLDN1_MOUSE	Cldnd1	2532	2529	2399	2034	2577	2532		2486.67	2381							3	3	3	3	3	3
	Q91V08	C-type lectin domain family 2 member D	CLC2D_MOUSE	Clec2d	24975	22759	23005	15547	22594	18989		23579.7	19043.3							7	7	8	8	8	7
	Q9Z1Q5	Chloride intracellular channel protein 1	CLIC1_MOUSE	Clic1	1330207	1356700	1395535	1068957	1248108	1240487		1360814	1.18585e+06							20	20	20	20	19	20
	Q9QYB1	Chloride intracellular channel protein 4	CLIC4_MOUSE	Clic4	65222	57215	57091	46377	57324	51812		59842.7	51837.7			literature				18	18	18	17	18	18
	Q99KN9	Clathrin interactor 1	EPN4_MOUSE	Clint1	30566	28657	31746	24810	28560	29162		30323	27510.7							21	22	22	22	20	22
	Q922J3	CAP-Gly domain-containing linker protein 1	CLIP1_MOUSE	Clip1	14532	9404	8740	6073	11222	8521		10892	8605.33			MS/MS				50	50	48	49	48	49
	P22518	Dual specificity protein kinase CLK1	CLK1_MOUSE	Clk1	594	600	528	397	459	522		574	459.333			mito protein domain				3	3	3	3	3	3
	O35492	Dual specificity protein kinase CLK3	CLK3_MOUSE	Clk3	4001	4185	3606	3022	3938	3647		3930.67	3535.67			targetP signal, mito protein domain				12	12	12	12	12	12
	Q3UMW8	Ceroid-lipofuscinosis neuronal protein 5 homolog	CLN5_MOUSE	Cln5	1533	1548	1488	1326	1312	1421		1523	1353							3	3	3	3	3	3
	Q61189	Methylosome subunit pICln	ICLN_MOUSE	Clns1a	47730	43269	53416	39231	51468	42599		48138.3	44432.7							6	6	6	6	6	6
	Q99LI9	Polyribonucleotide 5'-hydroxyl-kinase Clp1	CLP1_MOUSE	Clp1	8548	8121	7704	6952	7320	7624		8124.33	7298.67							12	12	12	12	12	12
	Q60649	Caseinolytic peptidase B protein homolog	CLPB_MOUSE	Clpb	6517	3322	3524	1970	4801	3372		4454.33	3381		MitoCarta3.0	APEX_IMS, targetP signal+, yeast mito homolog+, Rickettsial homolog, mito protein domain, MS/MS++	IMS	Protein import, sorting and homeostasis > Protein homeostasis > Proteases		10	9	9	9	10	10
	O88696	ATP-dependent Clp protease proteolytic subunit, mitochondrial	CLPP_MOUSE	Clpp	13214	13183	12986	13025	11677	12911		13127.7	12537.7		MitoCarta3.0	literature, APEX_matrix, targetP signal, Rickettsial homolog, mito protein domain, induction, coexpression+, MS/MS++	Matrix	Protein import, sorting and homeostasis > Protein homeostasis > Proteases		8	8	8	8	7	8
	Q8VBZ3	Cleft lip and palate transmembrane protein 1 homolog	CLPT1_MOUSE	Clptm1	11040	11947	12053	8482	9687	10476		11680	9548.33			induction				16	16	16	16	16	15
	Q8BXA5	Cleft lip and palate transmembrane protein 1-like protein	CLP1L_MOUSE	Clptm1l	3518	2708	2413	2266	3233	2915		2879.67	2804.67							5	5	5	5	5	5
	Q9JHS4	ATP-dependent Clp protease ATP-binding subunit clpX-like, mitochondrial	CLPX_MOUSE	Clpx	20585	21806	16580	16567	19012	16403		19657	17327.3		MitoCarta3.0	literature, APEX_matrix, targetP signal, yeast mito homolog++, Rickettsial homolog, mito protein domain, induction, coexpression, MS/MS++	Matrix	Protein import, sorting and homeostasis > Protein homeostasis > Proteases		21	22	21	22	21	22
	Q80YR7	Claspin	CLSPN_MOUSE	Clspn	871	830	898	630	904	829		866.333	787.667							8	7	8	8	8	8
	O08585	Clathrin light chain A	CLCA_MOUSE	Clta	55144	59302	59833	40849	53400	50605		58093	48284.7							8	8	7	8	8	8
	Q6IRU5-2	Isoform 2 of Clathrin light chain B	CLCB_MOUSE	Cltb	9710	8719	8077	5179	9580	7143		8835.33	7300.67							6	6	5	5	6	5
	Q68FD5	Clathrin heavy chain 1	CLH1_MOUSE	Cltc	218035	200998	200456	147455	181795	183138		206496	170796							109	107	103	103	105	107
	Q5SW19	Clustered mitochondria protein homolog	CLU_MOUSE	Cluh	8535	8237	8241	6014	8030	7563		8337.67	7202.33			induction, coexpression++				43	41	43	40	41	41
	Q8R4N0	Citramalyl-CoA lyase, mitochondrial	CLYBL_MOUSE	Clybl	7258	5873	6126	5883	6476	6029		6419	6129.33		MitoCarta3.0	APEX_matrix, targetP signal+, induction, coexpression+, MS/MS++	Matrix	Metabolism > Carbohydrate metabolism > Itaconate metabolism		10	10	10	10	10	10
	Q61419;Q61419-2	Cytidine monophosphate-N-acetylneuraminic acid hydroxylase;Isoform 2 of Cytidine monophosphate-N-acetylneuraminic acid hydroxylase	CMAH_MOUSE	Cmah	1325	1404	1315	1625	1092	1359		1348	1358.67			mito protein domain				5	5	5	5	5	5
	Q99KK2	N-acylneuraminate cytidylyltransferase	NEUA_MOUSE	Cmas	28812	27718	27849	25692	25120	28043		28126.3	26285			Rickettsial homolog				19	21	20	21	18	20
	Q9CPZ8	COX assembly mitochondrial protein homolog	COXM1_MOUSE	Cmc1	18333	18280	16487	15091	16740	14669		17700	15500		MitoCarta3.0	APEX_IMS, GFP, yeast mito homolog++, mito protein domain+, induction, coexpression, MS/MS+	IMS	OXPHOS > Complex IV > CIV assembly factors | OXPHOS > OXPHOS assembly factors		5	5	5	4	5	5
	Q8K199	COX assembly mitochondrial protein 2 homolog	COXM2_MOUSE	Cmc2	12902	12466	11074	8545	10464	9641		12147.3	9550		MitoCarta3.0	APEX_IMS, yeast mito homolog++, mito protein domain+, induction, coexpression, MS/MS+	IMS	OXPHOS > Complex IV > CIV assembly factors | OXPHOS > OXPHOS assembly factors		3	3	3	3	3	3
	Q9D486;Q9D486-2	C-Maf-inducing protein;Isoform 2 of C-Maf-inducing protein	CMIP_MOUSE	Cmip	466	669	420	422	311	304		518.333	345.667							5	6	6	5	5	6
	Q9DBP5	UMP-CMP kinase	KCY_MOUSE	Cmpk1	171930	173025	171320	129054	134967	141621		172092	135214			targetP signal, Rickettsial homolog, induction				14	15	14	14	12	14
	Q3U5Q7	UMP-CMP kinase 2, mitochondrial	CMPK2_MOUSE	Cmpk2	980	1460	1337	989	1180	1254		1259	1141		MitoCarta3.0	literature, targetP signal+, Rickettsial homolog, MS/MS	Matrix	Metabolism > Nucleotide metabolism > Nucleotide synthesis and processing		3	4	4	4	4	4
	Q9CZT6	Protein CMSS1	CMS1_MOUSE	Cmss1	6856	7307	7513	9312	7779	7564		7225.33	8218.33			mito protein domain				7	7	8	8	7	8
	Q9CZ69	CKLF-like MARVEL transmembrane domain-containing protein 6	CKLF6_MOUSE	Cmtm6	13492	12452	12110	9798	12746	12706		12684.7	11750							3	3	3	3	3	3
	Q9ESD6;Q9ESD6-2	CKLF-like MARVEL transmembrane domain-containing protein 7;Isoform 2 of CKLF-like MARVEL transmembrane domain-containing protein 7	CKLF7_MOUSE	Cmtm7	22036	20280	21963	15652	25273	22398		21426.3	21107.7							4	4	4	3	4	4
	Q9DBC3	Cap-specific mRNA (nucleoside-2'-O-)-methyltransferase 1	CMTR1_MOUSE	Cmtr1	17326	17437	16853	15988	15422	15471		17205.3	15627			mito protein domain				35	34	36	35	34	35
	P53996	Cellular nucleic acid-binding protein	CNBP_MOUSE	Cnbp	151473	131590	148674	109053	138244	144819		143912	130705							12	11	11	12	10	11
	Q9D1A2	Cytosolic non-specific dipeptidase	CNDP2_MOUSE	Cndp2	440344	412523	388801	414258	381110	435124		413889	410164			yeast mito homolog, Rickettsial homolog				37	36	35	36	36	35
	Q3UJ81	Nuclear envelope phosphatase-regulatory subunit 1	NEPR1_MOUSE	Cnep1r1	4554	4697	4445	3856	3596	3907		4565.33	3786.33							3	3	3	3	3	3
	Q08093	Calponin-2	CNN2_MOUSE	Cnn2	368766	332094	335425	255919	296475	290500		345428	280965							19	19	17	19	16	18
	Q32NY4;Q32NY4-2	Metal transporter CNNM3;Isoform 2 of Metal transporter CNNM3	CNNM3_MOUSE	Cnnm3	352	304	294	235	331	302		316.667	289.333			Rickettsial homolog, mito protein domain				2	2	2	2	2	2
	Q6ZQ08;Q6ZQ08-4	CCR4-NOT transcription complex subunit 1;Isoform 4 of CCR4-NOT transcription complex subunit 1	CNOT1_MOUSE	Cnot1	22989	22255	21790	18445	20037	20011		22344.7	19497.7							82	84	82	82	81	83
	Q8BH15	CCR4-NOT transcription complex subunit 10	CNO10_MOUSE	Cnot10	7758	7952	7427	6509	6964	6549		7712.33	6674			mito protein domain				24	24	23	24	23	23
	Q9CWN7	CCR4-NOT transcription complex subunit 11	CNO11_MOUSE	Cnot11	3975	4570	4249	3823	3980	3917		4264.67	3906.67			targetP signal				7	9	9	8	8	8
	Q8C5L3;Q8C5L3-2	CCR4-NOT transcription complex subunit 2;Isoform 2 of CCR4-NOT transcription complex subunit 2	CNOT2_MOUSE	Cnot2	13447	13399	13460	10874	12934	12070		13435.3	11959.3							14	13	13	13	13	13
	Q8K0V4	CCR4-NOT transcription complex subunit 3	CNOT3_MOUSE	Cnot3	9382	8552	8303	6872	7767	7637		8745.67	7425.33							13	13	12	13	14	12
	Q8BT14;Q8BT14-2;Q8BT14-3	CCR4-NOT transcription complex subunit 4;Isoform 2 of CCR4-NOT transcription complex subunit 4;Isoform 3 of CCR4-NOT transcription complex subunit 4	CNOT4_MOUSE	Cnot4	2866	2430	2553	1783	3181	2950		2616.33	2638			mito protein domain				7	8	8	8	8	8
	Q8K3P5;Q8K3P5-2	CCR4-NOT transcription complex subunit 6;Isoform 2 of CCR4-NOT transcription complex subunit 6	CNOT6_MOUSE	Cnot6	517	671	633	430	648	365		607	481			mito protein domain				3	3	3	2	3	3
	Q8VEG6;Q8VEG6-2	CCR4-NOT transcription complex subunit 6-like;Isoform 2 of CCR4-NOT transcription complex subunit 6-like	CNO6L_MOUSE	Cnot6l	3371	3083	2945	2416	2751	2858		3133	2675			mito protein domain				8	8	8	8	8	8
	Q60809	CCR4-NOT transcription complex subunit 7	CNOT7_MOUSE	Cnot7	7917	7003	6824	5869	6594	6285		7248	6249.33							10	10	10	9	10	10
	Q9D8X5	CCR4-NOT transcription complex subunit 8	CNOT8_MOUSE	Cnot8	9823	8600	10737	6628	10152	11645		9720	9475							9	9	8	9	8	9
	Q9JKY0	CCR4-NOT transcription complex subunit 9	CNOT9_MOUSE	Cnot9	26777	24387	25442	19397	23669	23717		25535.3	22261							15	14	15	14	14	14
	P16330;P16330-2	2',3'-cyclic-nucleotide 3'-phosphodiesterase;Isoform CNPI of 2',3'-cyclic-nucleotide 3'-phosphodiesterase	CN37_MOUSE	Cnp	66000	62653	60520	45433	54061	57413		63057.7	52302.3			targetP signal				26	25	26	25	25	26
	Q9QXT0	Protein canopy homolog 2	CNPY2_MOUSE	Cnpy2	57049	61400	61625	46979	53270	51776		60024.7	50675							13	13	13	13	13	13
	Q9DAU1	Protein canopy homolog 3	CNPY3_MOUSE	Cnpy3	6514	5903	4651	3270	5123	5529		5689.33	4640.67							7	7	6	7	7	6
	Q8BQ47	Protein canopy homolog 4	CNPY4_MOUSE	Cnpy4	6696	6448	6250	4649	5242	5163		6464.67	5018							5	5	4	4	4	5
	Q5M8N0	CB1 cannabinoid receptor-interacting protein 1	CNRP1_MOUSE	Cnrip1	865	767	770	612	832	669		800.667	704.333							2	2	2	2	2	2
	Q8CBC4;Q8CBC4-3	Consortin;Isoform 3 of Consortin	CNST_MOUSE	Cnst	463	500	305	398	369	400		422.667	389							2	2	2	2	2	2
	A2AL36	Centriolin	CNTRL_MOUSE	Cntrl	2371	2037	2396	2061	2066	1977		2268	2034.67			targetP signal, yeast mito homolog, mito protein domain				31	34	31	33	31	31
	Q8CB62;Q8CB62-2	Centrobin;Isoform 2 of Centrobin	CNTRB_MOUSE	Cntrob	295	450	248	412	499	442		331	451							3	4	3	4	4	4
	Q9D2R6	Cytochrome c oxidase assembly factor 3 homolog, mitochondrial	COA3_MOUSE	Coa3	22761	28461	24368	20573	21511	23334		25196.7	21806		MitoCarta3.0	APEX_IMS, APEX_matrix, mito protein domain+, coexpression, MS/MS++	MIM	Mitochondrial central dogma > Translation > Translation factors | OXPHOS > Complex IV > CIV assembly factors | OXPHOS > OXPHOS assembly factors		5	5	5	5	5	5
	Q8BGD8	Cytochrome c oxidase assembly factor 6 homolog	COA6_MOUSE	Coa6	6863	5574	6185	4899	4729	5540		6207.33	5056		MitoCarta3.0	APEX_IMS, yeast mito homolog++, mito protein domain+, induction, coexpression+, MS/MS	IMS	OXPHOS > Complex IV > CIV assembly factors | OXPHOS > OXPHOS assembly factors		4	4	4	4	4	3
	Q921H9	Cytochrome c oxidase assembly factor 7	COA7_MOUSE	Coa7	38045	55255	40144	35458	48974	31345		44481.3	38592.3		MitoCarta3.0	literature, APEX_IMS, mito protein domain, coexpression, MS/MS	IMS	OXPHOS > Complex IV > CIV assembly factors | OXPHOS > OXPHOS assembly factors		6	6	6	6	6	6
	Q9DBL7	Bifunctional coenzyme A synthase	COASY_MOUSE	Coasy	7768	8063	7593	6999	6931	7208		7808	7046		MitoCarta3.0	APEX_matrix, mito protein domain, coexpression, MS/MS++	Matrix	Metabolism > Metals and cofactors > Coenzyme A metabolism		12	12	12	12	12	12
	Q3UMF0;Q3UMF0-3	Cordon-bleu protein-like 1;Isoform 3 of Cordon-bleu protein-like 1	COBL1_MOUSE	Cobll1	4519	4617	4287	3511	4560	4033		4474.33	4034.67			induction, coexpression				29	29	30	25	29	28
	Q9Z160	Conserved oligomeric Golgi complex subunit 1	COG1_MOUSE	Cog1	6406	4037	4301	2890	3568	3565		4914.67	3341							21	20	20	20	21	20
	Q921L5	Conserved oligomeric Golgi complex subunit 2	COG2_MOUSE	Cog2	10702	9436	8857	4401	5595	8320		9665	6105.33							19	19	19	19	18	19
	Q8CI04	Conserved oligomeric Golgi complex subunit 3	COG3_MOUSE	Cog3	4266	3973	3845	2910	3900	3639		4028	3483							18	19	19	18	19	19
	Q8R1U1	Conserved oligomeric Golgi complex subunit 4	COG4_MOUSE	Cog4	2939	2929	2724	2236	2622	2497		2864	2451.67			coexpression				14	13	14	14	14	14
	Q8C0L8	Conserved oligomeric Golgi complex subunit 5	COG5_MOUSE	Cog5	5065	5698	5011	4637	5212	4804		5258	4884.33							15	15	15	14	14	15
	Q8R3I3	Conserved oligomeric Golgi complex subunit 6	COG6_MOUSE	Cog6	5138	5736	4755	3800	6894	5011		5209.67	5235							12	12	12	12	12	11
	Q3UM29	Conserved oligomeric Golgi complex subunit 7	COG7_MOUSE	Cog7	3527	3582	3185	2402	2755	2816		3431.33	2657.67							14	14	14	11	12	12
	Q9JJA2	Conserved oligomeric Golgi complex subunit 8	COG8_MOUSE	Cog8	1832	1629	1639	1310	1546	1476		1700	1444							7	7	7	7	7	7
	Q5SU73	Coilin	COIL_MOUSE	Coil	2007	2068	2205	1762	2031	1923		2093.33	1905.33							6	7	7	6	6	7
	P11087	Collagen alpha-1(I) chain	CO1A1_MOUSE	Col1a1	160	140	145	139	162	145		148.333	148.667							2	2	2	2	2	2
	P02463	Collagen alpha-1(IV) chain	CO4A1_MOUSE	Col4a1	222	144	196	186	143	178		187.333	169							2	2	2	2	2	2
	Q8K297	Procollagen galactosyltransferase 1	GT251_MOUSE	Colgalt1	7466	6274	6690	5337	7283	6398		6810	6339.33							17	17	17	18	16	17
	Q8K4M5	COMM domain-containing protein 1	COMD1_MOUSE	Commd1	5405	4655	4732	3443	4979	4226		4930.67	4216			coexpression				5	5	5	5	5	5
	Q8JZY2	COMM domain-containing protein 10	COMDA_MOUSE	Commd10	9907	8775	9295	7256	10019	8840		9325.67	8705							5	5	6	5	6	6
	Q8BXC6	COMM domain-containing protein 2	COMD2_MOUSE	Commd2	21011	19110	19735	13503	16338	17442		19952	15761							10	10	10	9	10	10
	Q63829	COMM domain-containing protein 3	COMD3_MOUSE	Commd3	19714	16621	14582	12556	17874	16803		16972.3	15744.3			induction				9	9	9	9	9	9
	Q9CQ02	COMM domain-containing protein 4	COMD4_MOUSE	Commd4	8737	7391	7297	5447	7054	7059		7808.33	6520							6	7	7	7	6	7
	Q8R395	COMM domain-containing protein 5	COMD5_MOUSE	Commd5	12178	19154	21671	18588	15784	20253		17667.7	18208.3							7	7	7	7	7	7
	Q3V4B5	COMM domain-containing protein 6	COMD6_MOUSE	Commd6	7599	7421	6558	6319	6378	5742		7192.67	6146.33							3	3	3	3	3	3
	Q8BG94	COMM domain-containing protein 7	COMD7_MOUSE	Commd7	1581	1317	1148	1198	1575	1384		1348.67	1385.67							3	3	3	3	3	3
	Q9CZG3	COMM domain-containing protein 8	COMD8_MOUSE	Commd8	3347	3059	1450	1839	1716	2259		2618.67	1938							4	4	3	4	3	4
	Q8K2Q0	COMM domain-containing protein 9	COMD9_MOUSE	Commd9	7029	5147	4871	4268	5744	5069		5682.33	5027			coexpression				6	6	6	6	6	6
	O88587;O88587-2	Catechol O-methyltransferase;Isoform Soluble of Catechol O-methyltransferase	COMT_MOUSE	Comt	19336	19022	16673	13787	19192	17522		18343.7	16833.7		MitoCarta3.0	GFP, induction, coexpression	Membrane	Metabolism > Amino acid metabolism > Catechol metabolism		13	13	13	12	13	13
	Q8BIG7	Catechol O-methyltransferase domain-containing protein 1	CMTD1_MOUSE	Comtd1	11474	10874	10765	7899	8924	9150		11037.7	8657.67		MitoCarta3.0	GFP, MS/MS++	Membrane			9	9	9	7	8	8
	Q8CIE6	Coatomer subunit alpha	COPA_MOUSE	Copa	95854	92444	89920	67330	81317	82527		92739.3	77058			mito protein domain				77	79	74	75	72	76
	Q9JIF7	Coatomer subunit beta	COPB_MOUSE	Copb1	91698	86682	83991	61969	76812	74929		87457	71236.7							54	55	55	55	53	54
	O55029	Coatomer subunit beta'	COPB2_MOUSE	Copb2	76986	75273	74255	55167	67558	71045		75504.7	64590			mito protein domain				47	46	46	46	43	47
	O89079	Coatomer subunit epsilon	COPE_MOUSE	Cope	58722	50953	46127	35760	51829	48744		51934	45444.3							12	12	12	12	12	12
	Q9QZE5	Coatomer subunit gamma-1	COPG1_MOUSE	Copg1	53461	50551	51070	36661	47344	45579		51694	43194.7							48	46	46	46	46	46
	Q9QXK3	Coatomer subunit gamma-2	COPG2_MOUSE	Copg2	23980	22001	21541	16440	20009	20420		22507.3	18956.3							32	32	31	32	32	32
	P61202	COP9 signalosome complex subunit 2	CSN2_MOUSE	Cops2	38243	37383	35276	30922	33401	34049		36967.3	32790.7							23	23	23	23	22	23
	O88543	COP9 signalosome complex subunit 3	CSN3_MOUSE	Cops3	31104	38991	34502	34458	32773	28421		34865.7	31884			coexpression				18	16	17	16	16	17
	O88544	COP9 signalosome complex subunit 4	CSN4_MOUSE	Cops4	43461	43863	44168	38194	43990	42423		43830.7	41535.7			coexpression				23	23	24	24	23	23
	O35864	COP9 signalosome complex subunit 5	CSN5_MOUSE	Cops5	42038	36695	34071	32533	35993	36734		37601.3	35086.7			targetP signal, coexpression				18	18	18	17	17	19
	O88545	COP9 signalosome complex subunit 6	CSN6_MOUSE	Cops6	32291	29769	29151	25585	27208	27726		30403.7	26839.7			coexpression				14	14	14	14	14	14
	Q9CZ04-2	Isoform 2 of COP9 signalosome complex subunit 7a	CSN7A_MOUSE	Cops7a	14141	14202	14820	12522	13130	14111		14387.7	13254.3							10	10	10	9	10	10
	Q8BV13	COP9 signalosome complex subunit 7b	CSN7B_MOUSE	Cops7b	8011	7737	7791	7131	8247	8026		7846.33	7801.33							7	7	7	7	7	7
	Q8VBV7	COP9 signalosome complex subunit 8	CSN8_MOUSE	Cops8	81081	64699	70665	59436	42745	62817		72148.3	54999.3			coexpression				7	7	7	7	7	7
	P61924	Coatomer subunit zeta-1	COPZ1_MOUSE	Copz1	61923	72170	60229	54148	86127	51314		64774	63863							7	7	7	7	6	7
	Q8BMS4	Ubiquinone biosynthesis O-methyltransferase, mitochondrial	COQ3_MOUSE	Coq3	1312	1348	1338	1472	1398	1290		1332.67	1386.67		MitoCarta3.0	APEX_matrix, targetP signal+, yeast mito homolog++, Rickettsial homolog, mito protein domain+, induction, coexpression+, MS/MS+	MIM	Metabolism > Metals and cofactors > Coenzyme Q metabolism		3	3	3	3	3	3
	Q9CXI0	2-methoxy-6-polyprenyl-1,4-benzoquinol methylase, mitochondrial	COQ5_MOUSE	Coq5	2346	3617	1930	2194	4667	3494		2631	3451.67		MitoCarta3.0	APEX_matrix, targetP signal, yeast mito homolog+, Rickettsial homolog, mito protein domain+, induction, coexpression++, MS/MS++	MIM	Metabolism > Metals and cofactors > Coenzyme Q metabolism		7	8	7	8	7	6
	Q8R1S0	Ubiquinone biosynthesis monooxygenase COQ6, mitochondrial	COQ6_MOUSE	Coq6	7082	52694	59798	53816	15996	20561		39858	30124.3		MitoCarta3.0	literature, APEX_matrix, targetP signal, yeast mito homolog++, Rickettsial homolog, mito protein domain, induction, coexpression+, MS/MS+	MIM	Metabolism > Metals and cofactors > Coenzyme Q metabolism		6	6	6	6	5	6
	P97478	5-demethoxyubiquinone hydroxylase, mitochondrial	COQ7_MOUSE	Coq7	2064	1706	1441	1728	1543	1468		1737	1579.67		MitoCarta3.0	literature, targetP signal, yeast mito homolog++, Rickettsial homolog, mito protein domain+, coexpression++, MS/MS++	MIM	Metabolism > Metals and cofactors > Coenzyme Q metabolism		4	4	4	4	4	4
	Q8K1Z0	Ubiquinone biosynthesis protein COQ9, mitochondrial	COQ9_MOUSE	Coq9	1790	1576	1362	1418	1648	1477		1576	1514.33		MitoCarta3.0	APEX_matrix, targetP signal+, yeast mito homolog++, Rickettsial homolog, mito protein domain+, induction, coexpression, MS/MS++	MIM	Metabolism > Metals and cofactors > Coenzyme Q metabolism		5	5	5	5	5	5
	O89053	Coronin-1A	COR1A_MOUSE	Coro1a	2752475	2636999	2609055	2094793	2599962	2510730		2.66618e+06	2.40183e+06			targetP signal, mito protein domain				33	32	32	32	32	32
	Q9WUM3	Coronin-1B	COR1B_MOUSE	Coro1b	60963	64042	60537	48519	56114	57844		61847.3	54159			targetP signal, mito protein domain				17	17	18	18	17	17
	Q9WUM4	Coronin-1C	COR1C_MOUSE	Coro1c	86302	86458	82680	64258	73261	74752		85146.7	70757			targetP signal, mito protein domain				26	26	25	27	20	23
	Q8C0P5	Coronin-2A	COR2A_MOUSE	Coro2a	26279	26276	25838	21249	23470	22823		26131	22514			targetP signal, mito protein domain				17	17	17	17	17	17
	Q9D2V7	Coronin-7	CORO7_MOUSE	Coro7	35957	38554	35997	33372	35406	34004		36836	34260.7			targetP signal, mito protein domain				42	40	41	40	40	40
	Q9CQI6	Coactosin-like protein	COTL1_MOUSE	Cotl1	1980542	1783716	1680239	1124019	1445397	1526763		1.81483e+06	1365393							15	13	14	14	15	13
	Q8BJ03;Q8BJ03-2	Cytochrome c oxidase assembly protein COX15 homolog;Isoform 2 of Cytochrome c oxidase assembly protein COX15 homolog	COX15_MOUSE	Cox15	2987	3191	2627	2484	2852	2808		2935	2714.67		MitoCarta3.0	literature, targetP signal, yeast mito homolog++, Rickettsial homolog, mito protein domain+, coexpression++, MS/MS	MIM	OXPHOS > Complex IV > CIV assembly factors | Metabolism > Metals and cofactors > Heme synthesis and processing | OXPHOS > OXPHOS assembly factors		8	8	7	8	7	8
	Q9CR63	Cytochrome c oxidase assembly protein COX16 homolog, mitochondrial	COX16_MOUSE	Cox16	4457	5966	5494	4892	4455	4565		5305.67	4637.33		MitoCarta3.0	APEX_IMS, GFP, targetP signal, yeast mito homolog++, mito protein domain+, MS/MS+	MIM	OXPHOS > Complex IV > CIV assembly factors | OXPHOS > OXPHOS assembly factors		2	2	2	2	2	2
	P56394	Cytochrome c oxidase copper chaperone	COX17_MOUSE	Cox17	6843	6566	5768	4676	6975	5218		6392.33	5623		MitoCarta3.0	literature, APEX_IMS, yeast mito homolog, mito protein domain+, induction, coexpression++, MS/MS++	IMS	OXPHOS > Complex IV > CIV assembly factors | Metabolism > Metals and cofactors > Copper metabolism | OXPHOS > OXPHOS assembly factors		4	4	4	3	4	4
	Q9D7J4	Cytochrome c oxidase assembly protein COX20, mitochondrial	COX20_MOUSE	Cox20	15536	15351	16041	11898	14868	15792		15642.7	14186		MitoCarta3.0	literature, APEX_IMS, GFP, yeast mito homolog++, MS/MS	MIM	OXPHOS > Complex IV > CIV assembly factors | OXPHOS > OXPHOS assembly factors		4	4	4	4	4	4
	P19783	Cytochrome c oxidase subunit 4 isoform 1, mitochondrial	COX41_MOUSE	Cox4i1	455695	517899	456432	418792	446174	450024		476675	438330		MitoCarta3.0	literature, APEX_IMS, APEX_matrix, targetP signal, mito protein domain+, coexpression++, MS/MS++	MIM	OXPHOS > Complex IV > CIV subunits | OXPHOS > OXPHOS subunits		12	12	12	11	10	11
	P12787	Cytochrome c oxidase subunit 5A, mitochondrial	COX5A_MOUSE	Cox5a	67986	79561	57674	53245	74270	60199		68407	62571.3		MitoCarta3.0	literature, APEX_IMS, APEX_matrix, targetP signal+, yeast mito homolog++, mito protein domain+, induction, coexpression++, MS/MS++	MIM	OXPHOS > Complex IV > CIV subunits | OXPHOS > OXPHOS subunits		7	7	6	7	7	6
	P19536	Cytochrome c oxidase subunit 5B, mitochondrial	COX5B_MOUSE	Cox5b	128416	144323	117707	116086	153145	121581		130149	130271							8	8	8	8	8	8
	P43024	Cytochrome c oxidase subunit 6A1, mitochondrial	CX6A1_MOUSE	Cox6a1	16365	9466	10083	8619	10843	7225		11971.3	8895.67		MitoCarta3.0	literature, targetP signal+, yeast mito homolog+, mito protein domain+, induction, coexpression, MS/MS++	MIM	OXPHOS > Complex IV > CIV subunits | OXPHOS > OXPHOS subunits		2	2	2	1	2	2
	P56391	Cytochrome c oxidase subunit 6B1	CX6B1_MOUSE	Cox6b1	519172	541147	496506	397672	444102	451995		518942	431256		MitoCarta3.0	literature, APEX_IMS, yeast mito homolog+, mito protein domain+, coexpression++, MS/MS++	MIM	OXPHOS > Complex IV > CIV subunits | OXPHOS > OXPHOS subunits		8	8	7	9	6	8
	Q9CPQ1	Cytochrome c oxidase subunit 6C	COX6C_MOUSE	Cox6c	585594	810329	696811	681466	586572	651528		697578	639855		MitoCarta3.0	literature, APEX_IMS, APEX_matrix, targetP signal, mito protein domain+, induction, coexpression++, MS/MS++	MIM	OXPHOS > Complex IV > CIV subunits | OXPHOS > OXPHOS subunits		10	10	10	10	9	10
	P48771	Cytochrome c oxidase subunit 7A2, mitochondrial	CX7A2_MOUSE	Cox7a2	11563	10676	11217	9060	10497	8958		11152	9505		MitoCarta3.0	literature, targetP signal, mito protein domain+, induction, coexpression++, MS/MS++	MIM	OXPHOS > Complex IV > CIV subunits | OXPHOS > OXPHOS subunits		2	2	2	2	2	2
	Q61387	Cytochrome c oxidase subunit 7A-related protein, mitochondrial	COX7R_MOUSE	Cox7a2l	3490	3361	3244	2292	3107	2944		3365	2781		MitoCarta3.0	literature, APEX_IMS, APEX_matrix, mito protein domain+, MS/MS+	MIM	OXPHOS > Complex IV > CIV subunits | OXPHOS > OXPHOS subunits | OXPHOS > OXPHOS assembly factors | OXPHOS > Respirasome assembly		2	2	2	2	2	2
	P17665	Cytochrome c oxidase subunit 7C, mitochondrial	COX7C_MOUSE	Cox7c	43909	36067	33769	27679	41935	37460		37915	35691.3		MitoCarta3.0	literature, APEX_IMS, targetP signal, yeast mito homolog++, mito protein domain+, MS/MS++	MIM	OXPHOS > Complex IV > CIV subunits | OXPHOS > OXPHOS subunits		2	2	2	2	2	2
	Q9JHH6	Carboxypeptidase B2	CBPB2_MOUSE	Cpb2	2696	2583	1814	2275	1217	1592		2364.33	1694.67			mito protein domain				2	2	2	2	2	2
	Q7TN98;Q7TN98-2;Q7TN98-3;Q7TN98-4;Q7TN98-5	Cytoplasmic polyadenylation element-binding protein 4;Isoform 2 of Cytoplasmic polyadenylation element-binding protein 4;Isoform 3 of Cytoplasmic polyadenylation element-binding protein 4;Isoform 4 of Cytoplasmic polyadenylation element-binding protein 4;Isoform 5 of Cytoplasmic polyadenylation element-binding protein 4	CPEB4_MOUSE	Cpeb4	156	154	170	122	87	212		160	140.333			yeast mito homolog, mito protein domain				5	5	5	3	3	4
	Q8C166	Copine-1	CPNE1_MOUSE	Cpne1	57185	54164	50767	43577	47434	47544		54038.7	46185			yeast mito homolog				19	18	18	19	18	19
	P59108	Copine-2	CPNE2_MOUSE	Cpne2	647	516	526	394	527	508		563	476.333			yeast mito homolog				2	2	2	2	2	2
	Q8BT60	Copine-3	CPNE3_MOUSE	Cpne3	34414	32115	31667	25740	31060	29631		32732	28810.3			yeast mito homolog				18	18	18	17	18	18
	P36552	Oxygen-dependent coproporphyrinogen-III oxidase, mitochondrial	HEM6_MOUSE	Cpox	26708	23855	23074	20829	23220	22497		24545.7	22182		MitoCarta3.0	literature, APEX_IMS, APEX_matrix, targetP signal, Rickettsial homolog, mito protein domain, coexpression, MS/MS++	MIM	Metabolism > Metals and cofactors > Heme synthesis and processing		20	21	21	20	20	21
	Q8BFS6;Q8BFS6-3;Q8BFS6-4	Serine/threonine-protein phosphatase CPPED1;Isoform 3 of Serine/threonine-protein phosphatase CPPED1;Isoform 4 of Serine/threonine-protein phosphatase CPPED1	CPPED_MOUSE	Cpped1	2982	1823	1662	754	1856	1227		2155.67	1279			coexpression+				3	3	3	2	2	1
	Q9EPU4	Cleavage and polyadenylation specificity factor subunit 1	CPSF1_MOUSE	Cpsf1	17735	16237	15531	11291	15455	15293		16501	14013			yeast mito homolog				44	44	43	41	42	42
	O35218	Cleavage and polyadenylation specificity factor subunit 2	CPSF2_MOUSE	Cpsf2	24936	23384	23586	19932	22421	22321		23968.7	21558			mito protein domain				35	33	34	35	33	33
	Q9QXK7	Cleavage and polyadenylation specificity factor subunit 3	CPSF3_MOUSE	Cpsf3	29124	27392	27070	23013	27355	26341		27862	25569.7			Rickettsial homolog, mito protein domain				29	31	29	31	29	31
	Q8BQZ5	Cleavage and polyadenylation specificity factor subunit 4	CPSF4_MOUSE	Cpsf4	22926	19738	19901	16662	20042	18619		20855	18441							10	10	10	10	10	10
	Q8BQZ5-2;Q8BQZ5-3	Isoform 2 of Cleavage and polyadenylation specificity factor subunit 4;Isoform 3 of Cleavage and polyadenylation specificity factor subunit 4	CPSF4_MOUSE	Cpsf4	3350	3433	3374	2766	3361	3332		3385.67	3153							2	2	2	2	2	3
	Q6NVF9	Cleavage and polyadenylation specificity factor subunit 6	CPSF6_MOUSE	Cpsf6	75119	78550	78112	67975	80153	74522		77260.3	74216.7			mito protein domain				16	16	14	17	16	17
	Q8BTV2;Q8BTV2-2	Cleavage and polyadenylation specificity factor subunit 7;Isoform 2 of Cleavage and polyadenylation specificity factor subunit 7	CPSF7_MOUSE	Cpsf7	14855	14358	14329	13048	14561	14304		14514	13971			mito protein domain				14	14	14	14	14	14
	P97742	Carnitine O-palmitoyltransferase 1, liver isoform	CPT1A_MOUSE	Cpt1a	3804	4197	3776	4023	3486	3760		3925.67	3756.33		MitoCarta3.0	literature, yeast mito homolog+, mito protein domain, induction, coexpression, MS/MS++	MOM	Metabolism > Lipid metabolism > Fatty acid oxidation | Metabolism > Metals and cofactors > Carnitine synthesis and transport | Metabolism > Metals and cofactors > Carnitine shuttle		11	11	11	11	11	11
	P52825	Carnitine O-palmitoyltransferase 2, mitochondrial	CPT2_MOUSE	Cpt2	9663	8294	6672	8280	8141	7306		8209.67	7909		MitoCarta3.0	literature, APEX_matrix, targetP signal, yeast mito homolog++, mito protein domain, induction, coexpression+, MS/MS++	MIM	Metabolism > Lipid metabolism > Fatty acid oxidation | Metabolism > Metals and cofactors > Carnitine synthesis and transport | Metabolism > Metals and cofactors > Carnitine shuttle		20	20	20	20	20	20
	Q64735;Q64735-2	Complement component receptor 1-like protein;Isoform 2 of Complement component receptor 1-like protein	CR1L_MOUSE	Cr1l	18603	18494	18600	13628	16898	15678		18565.7	15401.3							11	11	11	11	11	11
	O88843	Death domain-containing protein CRADD	CRADD_MOUSE	Cradd	3905	3299	3040	4198	2921	3277		3414.67	3465.33			mito protein domain, coexpression				6	6	6	6	6	6
	Q8C7D2;Q8C7D2-2;Q8C7D2-3	Protein cereblon;Isoform 2 of Protein cereblon;Isoform 3 of Protein cereblon	CRBN_MOUSE	Crbn	2946	2412	2603	2027	2401	2562		2653.67	2330			mito protein domain				7	7	7	7	7	7
	Q01147	Cyclic AMP-responsive element-binding protein 1	CREB1_MOUSE	Creb1	26326	29613	30438	27769	26331	27840		28792.3	27313.3			mito protein domain				6	6	6	6	6	6
	P45481	Histone lysine acetyltransferase CREBBP	CBP_MOUSE	Crebbp	2300	2188	2145	1790	1981	1951		2211	1907.33							26	26	26	26	26	26
	O88668	Protein CREG1	CREG1_MOUSE	Creg1	4577	3894	3452	2894	3144	3245		3974.33	3094.33			MS/MS+				2	2	2	2	2	2
	Q9CYA0	Protein disulfide isomerase Creld2	CREL2_MOUSE	Creld2	18598	20458	19939	12360	17462	17813		19665	15878.3							15	14	14	13	13	14
	P63254	Cysteine-rich protein 1	CRIP1_MOUSE	Crip1	1276375	1058153	1129543	694245	1229233	1037316		1.15469e+06	986931			MS/MS+				7	7	7	7	7	7
	Q9DCT8	Cysteine-rich protein 2	CRIP2_MOUSE	Crip2	1123	1348	1104	983	916	996		1191.67	965			induction				2	2	2	2	2	2
	O70333	Cysteine-rich PDZ-binding protein	CRIPT_MOUSE	Cript	12652	12148	12078	10847	10799	11340		12292.7	10995.3			coexpression				2	2	2	2	2	2
	Q64010;Q64010-2	Adapter molecule crk;Isoform Crk-I of Adapter molecule crk	CRK_MOUSE	Crk	4852	4523	5079	3980	4596	4399		4818	4325			yeast mito homolog, mito protein domain				7	7	7	6	7	7
	P47941	Crk-like protein	CRKL_MOUSE	Crkl	60761	63099	63427	53173	56126	56043		62429	55114			yeast mito homolog, mito protein domain				18	17	17	15	16	16
	Q8CII9;Q8CII9-3	Cytokine receptor-like factor 2;Isoform 3 of Cytokine receptor-like factor 2	CRLF2_MOUSE	Crlf2	2411	3234	3753	2581	5084	2834		3132.67	3499.67							5	5	5	5	5	5
	Q9Z2L7	Cytokine receptor-like factor 3	CRLF3_MOUSE	Crlf3	35714	34879	33060	26185	30434	31869		34551	29496			induction				16	16	15	15	14	16
	P97427	Dihydropyrimidinase-related protein 1	DPYL1_MOUSE	Crmp1	63087	60310	63034	50472	58179	53803		62143.7	54151.3							26	27	26	27	25	27
	P63154	Crooked neck-like protein 1	CRNL1_MOUSE	Crnkl1	20209	20251	20412	17623	18672	19112		20290.7	18469							28	28	28	28	26	28
	Q8CJ40-2	Isoform 2 of Rootletin	CROCC_MOUSE	Crocc	109	97	85	89	107	91		97	95.6667							2	2	2	2	2	2
	Q9DC50	Peroxisomal carnitine O-octanoyltransferase	OCTC_MOUSE	Crot	24960	24262	23509	15100	20499	19204		24243.7	18267.7		MitoCarta3.0	yeast mito homolog+, mito protein domain, induction, coexpression, MS/MS	unknown	Metabolism > Lipid metabolism > Fatty acid oxidation		24	23	23	24	23	22
	Q149L7;Q149L7-3	Cytotoxic and regulatory T-cell molecule;Isoform 3 of Cytotoxic and regulatory T-cell molecule	CRTAM_MOUSE	Crtam	556	318	1766	426	1765	610		880	933.667							3	2	3	2	2	3
	Q3U182	CREB-regulated transcription coactivator 2	CRTC2_MOUSE	Crtc2	465	415	532	402	477	499		470.667	459.333							2	2	2	2	3	3
	Q91X84	CREB-regulated transcription coactivator 3	CRTC3_MOUSE	Crtc3	1009	1108	1168	718	1318	932		1095	989.333							2	2	2	2	2	2
	P97784	Cryptochrome-1	CRY1_MOUSE	Cry1	289	270	270	184	193	179		276.333	185.333		MitoCarta3.0	literature, yeast mito homolog, mito protein domain, coexpression	unknown			2	2	2	2	1	1
	A0A0G2JG52;E9PVP1	Crystallin beta-gamma domain-containing 1	A0A0G2JG52_MOUSE;E9PVP1_MOUSE	Crybg1	3903	3433	3714	1981	3580	3231		3683.33	2930.67							20	20	19	17	19	19
	Q99KP3	Lambda-crystallin homolog	CRYL1_MOUSE	Cryl1	3703	3591	3396	3376	3488	3322		3563.33	3395.33			yeast mito homolog, Rickettsial homolog, mito protein domain				5	5	5	5	5	5
	P47199	Quinone oxidoreductase	QOR_MOUSE	Cryz	1529	1132	1359	1701	1572	1547		1340	1606.67		MitoCarta3.0	APEX_matrix, mito protein domain, MS/MS	Matrix			5	4	4	6	4	5
	Q921W4	Quinone oxidoreductase-like protein 1	QORL1_MOUSE	Cryzl1	4536	4292	4364	3179	4124	3797		4397.33	3700			mito protein domain				9	9	9	8	9	8
	Q9CZU6	Citrate synthase, mitochondrial	CISY_MOUSE	Cs	291872	321849	310858	251711	254659	265880		308193	257417		MitoCarta3.0	literature, APEX_matrix, targetP signal, yeast mito homolog+, Rickettsial homolog, mito protein domain, induction, coexpression++, MS/MS++	Matrix	Metabolism > Carbohydrate metabolism > TCA cycle		21	21	21	21	20	20
	Q91W50	Cold shock domain-containing protein E1	CSDE1_MOUSE	Csde1	44317	43130	44183	26785	45278	40874		43876.7	37645.7			coexpression				42	42	42	41	41	42
	Q9ERK4	Exportin-2	XPO2_MOUSE	Cse1l	86577	84389	84619	74573	77178	81857		85195	77869.3							56	55	57	54	55	53
	P41241	Tyrosine-protein kinase CSK	CSK_MOUSE	Csk	146814	149146	145516	123276	123233	131480		147159	125996			mito protein domain				24	24	24	24	24	24
	Q8BK63-2	Isoform 2 of Casein kinase I isoform alpha	KC1A_MOUSE	Csnk1a1	32340	31455	30705	25251	27483	28422		31500	27052			mito protein domain				14	15	15	14	13	14
	Q9DC28;Q9DC28-2	Casein kinase I isoform delta;Isoform 2 of Casein kinase I isoform delta	KC1D_MOUSE	Csnk1d	6818	6618	6339	5208	6348	6296		6591.67	5950.67			mito protein domain				11	11	10	10	11	11
	Q8BTH8	Casein kinase I isoform gamma-1	KC1G1_MOUSE	Csnk1g1	1063	940	917	750	847	867		973.333	821.333			mito protein domain				3	3	2	3	3	3
	Q8BVP5	Casein kinase I isoform gamma-2	KC1G2_MOUSE	Csnk1g2	348	342	348	269	248	303		346	273.333			mito protein domain				2	2	2	2	2	2
	Q8C4X2	Casein kinase I isoform gamma-3	KC1G3_MOUSE	Csnk1g3	3684	3673	3775	3101	3613	3526		3710.67	3413.33			mito protein domain				7	8	8	7	7	7
	Q60737	Casein kinase II subunit alpha	CSK21_MOUSE	Csnk2a1	74019	68522	68070	54553	66781	64986		70203.7	62106.7			mito protein domain, induction, coexpression				20	19	20	20	19	20
	O54833	Casein kinase II subunit alpha'	CSK22_MOUSE	Csnk2a2	24054	22039	21782	18989	21457	21210		22625	20552			mito protein domain				17	17	16	17	17	17
	P67871	Casein kinase II subunit beta	CSK2B_MOUSE	Csnk2b	84063	86756	87705	62696	88126	79421		86174.7	76747.7							10	9	10	10	10	9
	P97315	Cysteine and glycine-rich protein 1	CSRP1_MOUSE	Csrp1	113295	97422	100039	75877	97736	101519		103585	91710.7							11	11	11	11	11	11
	P21460	Cystatin-C	CYTC_MOUSE	Cst3	4575	5247	5003	4285	4826	4225		4941.67	4445.33			MS/MS				4	4	4	4	4	4
	O89098	Cystatin-F	CYTF_MOUSE	Cst7	6579	8178	7881	6454	7707	7109		7546	7090							2	2	2	2	2	2
	Q62426	Cystatin-B	CYTB_MOUSE	Cstb	397321	165335	104378	89217	206515	210261		222345	168664			MS/MS				5	5	4	5	5	5
	Q99LC2	Cleavage stimulation factor subunit 1	CSTF1_MOUSE	Cstf1	24932	24494	23343	20993	22982	20833		24256.3	21602.7			mito protein domain				15	15	15	15	15	14
	Q8BIQ5	Cleavage stimulation factor subunit 2	CSTF2_MOUSE	Cstf2	35552	35059	38192	28425	42440	34117		36267.7	34994			mito protein domain				18	18	18	18	18	18
	Q8C7E9	Cleavage stimulation factor subunit 2 tau variant	CSTFT_MOUSE	Cstf2t	1815	1811	1735	1574	1863	1622		1787	1686.33			mito protein domain, induction				4	5	5	5	5	5
	Q99LI7	Cleavage stimulation factor subunit 3	CSTF3_MOUSE	Cstf3	33370	33231	32383	27601	31174	29858		32994.7	29544.3			yeast mito homolog				25	25	25	25	25	24
	O88712;O88712-2	C-terminal-binding protein 1;Isoform 2 of C-terminal-binding protein 1	CTBP1_MOUSE	Ctbp1	35197	32607	31426	26896	32514	31862		33076.7	30424			targetP signal, mito protein domain				13	13	13	13	13	13
	Q8R242	Di-N-acetylchitobiase	DIAC_MOUSE	Ctbs	660	1025	705	724	579	550		796.667	617.667			MS/MS				4	5	4	5	4	4
	Q5SUQ9	CST complex subunit CTC1	CTC1_MOUSE	Ctc1	4316	4278	4154	4158	3469	4205		4249.33	3944							20	20	20	21	19	21
	Q61164	Transcriptional repressor CTCF	CTCF_MOUSE	Ctcf	12572	13292	12845	11352	12803	11785		12903	11980							27	28	28	27	26	28
	Q7TSG2	RNA polymerase II subunit A C-terminal domain phosphatase	CTDP1_MOUSE	Ctdp1	10925	10654	10088	9796	10077	9763		10555.7	9878.67			mito protein domain				29	29	29	29	29	29
	P58466	Carboxy-terminal domain RNA polymerase II polypeptide A small phosphatase 1	CTDS1_MOUSE	Ctdsp1	3481	3502	3378	3074	3341	3187		3453.67	3200.67			mito protein domain, coexpression				4	4	4	4	3	3
	Q8BG15	CTD small phosphatase-like protein 2	CTSL2_MOUSE	Ctdspl2	10594	9985	10233	8153	10453	9607		10270.7	9404.33			targetP signal, mito protein domain				15	15	16	16	16	16
	P12399	Protein CTLA-2-alpha	CTL2A_MOUSE	Ctla2a	8265	7624	4985	3664	6610	4970		6958	5081.33							7	7	7	6	7	7
	P09793	Cytotoxic T-lymphocyte protein 4	CTLA4_MOUSE	Ctla4	1940	1613	1613	1728	1450	1717		1722	1631.67							4	3	3	4	3	4
	P26231	Catenin alpha-1	CTNA1_MOUSE	Ctnna1	6443	7162	10494	5133	9908	11078		8033	8706.33							27	26	27	24	27	26
	Q02248	Catenin beta-1	CTNB1_MOUSE	Ctnnb1	514	435	175	467	24	135		374.667	208.667							3	1	2	1	1	2
	Q9CWL8	Beta-catenin-like protein 1	CTBL1_MOUSE	Ctnnbl1	29700	28074	27864	26580	25446	24633		28546	25553							29	29	28	29	29	29
	P70698	CTP synthase 1	PYRG1_MOUSE	Ctps1	35187	34293	33236	29546	29583	30750		34238.7	29959.7			Rickettsial homolog, mito protein domain				25	25	24	25	25	25
	P70303	CTP synthase 2	PYRG2_MOUSE	Ctps2	32006	31736	31402	28809	28807	29076		31714.7	28897.3			Rickettsial homolog, mito protein domain, MS/MS				25	26	25	26	25	25
	Q62018	RNA polymerase-associated protein CTR9 homolog	CTR9_MOUSE	Ctr9	8761	8046	8381	6672	8000	8171		8396	7614.33			mito protein domain				27	27	27	27	27	27
	P16675	Lysosomal protective protein	PPGB_MOUSE	Ctsa	13457	15203	12708	11258	9604	10977		13789.3	10613							12	12	12	12	11	11
	P10605	Cathepsin B	CATB_MOUSE	Ctsb	33911	30671	28723	19964	26499	26045		31101.7	24169.3			MS/MS++				11	12	10	10	11	10
	P97821	Dipeptidyl peptidase 1	CATC_MOUSE	Ctsc	32419	32497	30461	23839	26656	28436		31792.3	26310.3							11	12	11	10	10	11
	P18242	Cathepsin D	CATD_MOUSE	Ctsd	267521	262056	254605	197756	226125	217422		261394	213768			yeast mito homolog, MS/MS++				21	20	19	21	19	21
	O70370	Cathepsin S	CATS_MOUSE	Ctss	19297	20346	16793	17628	15392	17415		18812	16811.7							8	9	8	8	8	9
	P56203	Cathepsin W	CATW_MOUSE	Ctsw	49924	42656	41347	23986	43018	36428		44642.3	34477.3							17	16	17	17	17	17
	Q9WUU7	Cathepsin Z	CATZ_MOUSE	Ctsz	30138	27882	27716	21815	14905	26936		28578.7	21218.7			MS/MS				10	10	10	10	10	10
	Q99J10	Cytoplasmic tRNA 2-thiolation protein 1	CTU1_MOUSE	Ctu1	2662	2756	2318	2159	2271	2450		2578.67	2293.33			targetP signal, yeast mito homolog, Rickettsial homolog, mito protein domain				6	7	6	7	7	7
	Q3U308	Cytoplasmic tRNA 2-thiolation protein 2	CTU2_MOUSE	Ctu2	6351	6835	6742	5750	6052	6426		6642.67	6076							11	11	11	11	11	11
	Q9WTX6	Cullin-1	CUL1_MOUSE	Cul1	34478	29840	31718	22709	30051	28022		32012	26927.3							37	38	39	38	34	35
	Q9D4H8	Cullin-2	CUL2_MOUSE	Cul2	20128	19141	17731	15040	16593	16457		19000	16030			coexpression				39	39	38	37	38	39
	Q9JLV5	Cullin-3	CUL3_MOUSE	Cul3	30972	29074	29838	23401	28494	28116		29961.3	26670.3							40	39	38	39	38	39
	Q3TCH7	Cullin-4A	CUL4A_MOUSE	Cul4a	2497	2028	2182	1612	2239	2024		2235.67	1958.33			coexpression				13	13	13	12	12	13
	A2A432	Cullin-4B	CUL4B_MOUSE	Cul4b	15385	13922	14557	11203	13749	13516		14621.3	12822.7							46	45	47	46	44	46
	Q9D5V5	Cullin-5	CUL5_MOUSE	Cul5	11763	11594	11124	10358	11164	10857		11493.7	10793							34	37	36	38	36	37
	Q3UY34	Protein CUSTOS	CSTOS_MOUSE	Custos	5812	5612	5874	4145	6305	5547		5766	5332.33							6	6	6	6	6	6
	Q9CQ89	Protein CutA	CUTA_MOUSE	Cuta	10450	9147	8465	7423	8537	8603		9354	8187.67			Rickettsial homolog, coexpression				2	2	2	2	2	2
	P53564-3	Isoform 3 of Homeobox protein cut-like 1	CUX1_MOUSE	Cux1	522	491	467	436	550	486		493.333	490.667							11	9	10	9	11	10
	Q9JHS9	Spliceosome-associated protein CWC15 homolog	CWC15_MOUSE	Cwc15	19337	17462	17582	18372	19135	18290		18127	18599							8	8	7	8	7	8
	Q8C5N3;Q8C5N3-2	Pre-mRNA-splicing factor CWC22 homolog;Isoform 2 of Pre-mRNA-splicing factor CWC22 homolog	CWC22_MOUSE	Cwc22	7552	7416	6856	6569	6808	6531		7274.67	6636			targetP signal				21	21	20	21	20	22
	Q9DBF7	Pre-mRNA-splicing factor CWC25 homolog	CWC25_MOUSE	Cwc25	2810	2936	2944	2354	2414	2405		2896.67	2391							6	6	6	5	5	5
	Q3TKY6	Spliceosome-associated protein CWC27 homolog	CWC27_MOUSE	Cwc27	9847	11603	11418	11485	11720	11130		10956	11445			mito protein domain				11	11	10	10	10	10
	Q8CI33	CWF19-like protein 1	C19L1_MOUSE	Cwf19l1	15101	13160	12726	11824	13273	12899		13662.3	12665.3							18	18	18	18	19	19
	Q8BG79	CWF19-like protein 2	C19L2_MOUSE	Cwf19l2	1119	585	797	875	730	1151		833.667	918.667							8	9	8	9	9	9
	O88410	C-X-C chemokine receptor type 3	CXCR3_MOUSE	Cxcr3	3511	3432	3125	2400	2816	2627		3356	2614.33							5	5	5	5	5	5
	P70658;P70658-2	C-X-C chemokine receptor type 4;Isoform CXCR4-A of C-X-C chemokine receptor type 4	CXCR4_MOUSE	Cxcr4	71	67	82	73	86	83		73.3333	80.6667							2	2	2	2	2	2
	Q9EQ16	C-X-C chemokine receptor type 6	CXCR6_MOUSE	Cxcr6	2593	1939	1941	502	1675	1563		2157.67	1246.67							3	3	3	2	3	3
	Q9CWW7	CXXC-type zinc finger protein 1	CXXC1_MOUSE	Cxxc1	3651	3832	3877	3397	3566	3539		3786.67	3500.67							15	15	15	14	14	15
	P56395	Cytochrome b5	CYB5_MOUSE	Cyb5a	107650	93652	84898	76340	104171	97832		95400	92781			mito protein domain, coexpression, MS/MS				5	5	5	5	5	5
	Q9CQX2	Cytochrome b5 type B	CYB5B_MOUSE	Cyb5b	75637	70542	68474	50334	75024	69383		71551	64913.7		MitoCarta3.0	literature, mito protein domain, coexpression, MS/MS++	MOM	Metabolism > Metals and cofactors > Heme-containing proteins | Metabolism > Detoxification > Xenobiotic metabolism | Metabolism > Detoxification > Amidoxime reducing complex | Metabolism > Electron carriers > Cytochromes		7	7	7	7	7	7
	Q9DB73	NADH-cytochrome b5 reductase 1	NB5R1_MOUSE	Cyb5r1	7761	8452	8298	5559	9191	5679		8170.33	6809.67			yeast mito homolog, mito protein domain, MS/MS++				11	11	11	11	10	10
	Q9DCN2;Q9DCN2-2	NADH-cytochrome b5 reductase 3;Isoform 2 of NADH-cytochrome b5 reductase 3	NB5R3_MOUSE	Cyb5r3	59437	57141	59187	45297	55721	53020		58588.3	51346		MitoCarta3.0	literature, mito protein domain, MS/MS+	MOM	Metabolism > Detoxification > Xenobiotic metabolism | Metabolism > Detoxification > Amidoxime reducing complex | Metabolism > Lipid metabolism		18	18	18	18	18	18
	Q3TDX8	Cytochrome b5 reductase 4	NB5R4_MOUSE	Cyb5r4	9173	7492	10214	5479	8634	9547		8959.67	7886.67			mito protein domain				9	8	9	8	9	9
	Q61462	Cytochrome b-245 light chain	CY24A_MOUSE	Cyba	13928	17773	20010	6742	16405	11989		17237	11712							5	6	6	5	6	6
	Q3TYS2	Cytochrome b-245 chaperone 1	CYBC1_MOUSE	Cybc1	51004	49986	43574	43495	39776	44139		48188	42470			targetP signal				10	10	10	10	9	10
	Q9D0M3;Q9D0M3-2	Cytochrome c1, heme protein, mitochondrial;Isoform 2 of Cytochrome c1, heme protein, mitochondrial	CY1_MOUSE	Cyc1	52779	61367	55194	50925	44202	49321		56446.7	48149.3		MitoCarta3.0	literature, APEX_IMS, APEX_matrix, targetP signal, yeast mito homolog++, Rickettsial homolog, mito protein domain+, induction, coexpression++, MS/MS++	MIM	OXPHOS > Complex III > CIII subunits | Metabolism > Metals and cofactors > Heme-containing proteins | Metabolism > Electron carriers > Cytochromes | OXPHOS > OXPHOS subunits		12	12	12	12	12	12
	P62897	Cytochrome c, somatic	CYC_MOUSE	Cycs	370375	383560	348537	325348	292846	290901		367491	303032		MitoCarta3.0	literature, APEX_IMS, yeast mito homolog+, Rickettsial homolog, mito protein domain+, MS/MS++	IMS	Metabolism > Metals and cofactors > Heme-containing proteins | Metabolism > Electron carriers > Cytochromes | OXPHOS > OXPHOS subunits | OXPHOS > Cytochrome C | Mitochondrial dynamics and surveillance > Apoptosis		9	9	9	9	8	10
	Q7TMB8	Cytoplasmic FMR1-interacting protein 1	CYFP1_MOUSE	Cyfip1	22925	24106	22315	18295	17913	19102		23115.3	18436.7			Rickettsial homolog, MS/MS				27	27	26	27	27	27
	Q5SQX6	Cytoplasmic FMR1-interacting protein 2	CYFP2_MOUSE	Cyfip2	40092	37303	33876	27043	32044	33012		37090.3	30699.7							40	40	39	39	37	38
	Q9QXA1	Cysteine and histidine-rich protein 1	CYHR1_MOUSE	Cyhr1	1638	1487	1292	1332	1184	1207		1472.33	1241			coexpression				3	3	3	3	3	3
	Q80TQ2;Q80TQ2-2	Ubiquitin carboxyl-terminal hydrolase CYLD;Isoform 1 of Ubiquitin carboxyl-terminal hydrolase CYLD	CYLD_MOUSE	Cyld	5065	4595	4742	3373	4628	4197		4800.67	4066			mito protein domain				21	22	21	20	22	22
	Q8BKE6	Cytochrome P450 20A1	CP20A_MOUSE	Cyp20a1	48368	42722	46703	13192	25833	43540		45931	27521.7			mito protein domain				15	15	15	15	15	15
	Q9EP75	Leukotriene-B4 omega-hydroxylase 3	CP4FE_MOUSE	Cyp4f14	47237	44876	46262	34536	33013	37072		46125	34873.7			mito protein domain				2	2	2	2	2	2
	Q8K0C4	Lanosterol 14-alpha demethylase	CP51A_MOUSE	Cyp51a1	36281	35041	38019	20528	34816	32334		36447	29226			mito protein domain				24	23	22	22	22	22
	Q8BHZ0	CYFIP-related Rac1 interactor A	CYRIA_MOUSE	Cyria	55825	58686	55971	45387	44390	50043		56827.3	46606.7							13	13	13	13	13	13
	Q921M7	CYFIP-related Rac1 interactor B	CYRIB_MOUSE	Cyrib	260943	244038	241322	187152	236328	224125		248768	215868							19	18	19	18	19	19
	Q9QX11;Q9QX11-2	Cytohesin-1;Isoform 2 of Cytohesin-1	CYH1_MOUSE	Cyth1	13150	13808	12690	12943	10793	11179		13216	11638.3			Rickettsial homolog, mito protein domain, induction				13	13	13	13	13	12
	Q80YW0	Cytohesin-4	CYH4_MOUSE	Cyth4	15160	15799	15475	12567	14021	13091		15478	13226.3			Rickettsial homolog, mito protein domain				11	11	11	11	11	11
	Q91VY6	Cytohesin-interacting protein	CYTIP_MOUSE	Cytip	5440	5143	4674	4521	4627	4576		5085.67	4574.67			mito protein domain				7	7	7	7	7	7
	Q8BHG2;Q8BHG2-3	CXXC motif containing zinc binding protein;Isoform 3 of CXXC motif containing zinc binding protein	CZIB_MOUSE	Czib	27065	24550	25105	20628	24798	24530		25573.3	23318.7			targetP signal				6	6	5	5	6	6
	Q9CX66	Uncharacterized protein C12orf45 homolog	CL045_MOUSE	D10Wsu102e	4455	3992	3899	3520	4685	3901		4115.33	4035.33			coexpression				4	4	4	4	4	4
	Q91YN0	Protein C12orf4 homolog	CL004_MOUSE	D6Wsu163e	744	719	658	501	629	629		707	586.333							4	4	4	4	4	4
	Q8R1F0	Leydig cell tumor 10 kDa protein homolog	L10K_MOUSE	D8Ertd738e	1040	1043	899	660	1099	1010		994	923			coexpression				4	4	4	4	4	4
	P61804	Dolichyl-diphosphooligosaccharide--protein glycosyltransferase subunit DAD1	DAD1_MOUSE	Dad1	84785	57319	73243	54445	81566	75907		71782.3	70639.3							4	4	4	4	4	4
	Q91WC9	Diacylglycerol lipase-beta	DGLB_MOUSE	Daglb	323	279	252	186	177	164		284.667	175.667							2	2	2	2	2	2
	Q6PJN8	DALR anticodon-binding domain-containing protein 3	DALD3_MOUSE	Dalrd3	722	685	472	256	596	338		626.333	396.667			mito protein domain				4	4	4	3	4	4
	Q91XC8	Death-associated protein 1	DAP1_MOUSE	Dap	26245	25072	22283	30098	24761	26906		24533.3	27255							5	5	4	5	5	5
	Q9ER88	28S ribosomal protein S29, mitochondrial	RT29_MOUSE	Dap3	18919	20248	18592	17191	16377	17260		19253	16942.7		MitoCarta3.0	literature, APEX_matrix, targetP signal, yeast mito homolog++, mito protein domain+, coexpression, MS/MS++	Matrix	Mitochondrial central dogma > Translation > Mitochondrial ribosome		14	14	14	14	14	14
	Q8VDF3	Death-associated protein kinase 2	DAPK2_MOUSE	Dapk2	11003	9370	9721	6742	8936	8452		10031.3	8043.33			mito protein domain				9	9	9	9	9	9
	O54784	Death-associated protein kinase 3	DAPK3_MOUSE	Dapk3	1775	1427	1601	1276	1896	1705		1601	1625.67			mito protein domain, coexpression				2	2	2	2	2	2
	Q9D757	Death-associated protein-like 1	DAPL1_MOUSE	Dapl1	10238	10108	8778	9425	7276	9199		9708	8633.33							5	5	5	5	5	5
	Q922B2	Aspartate--tRNA ligase, cytoplasmic	SYDC_MOUSE	Dars1	302498	295700	302037	252694	283082	282956		300078	272911			Rickettsial homolog, mito protein domain, coexpression				37	37	36	37	36	37
	Q8BIP0	Aspartate--tRNA ligase, mitochondrial	SYDM_MOUSE	Dars2	1384	1450	1461	1384	1273	1394		1431.67	1350.33		MitoCarta3.0	APEX_matrix, targetP signal, yeast mito homolog++, Rickettsial homolog, mito protein domain, coexpression, MS/MS	Matrix	Mitochondrial central dogma > Translation > mt-tRNA synthetases		4	4	4	4	4	4
	O35613	Death domain-associated protein 6	DAXX_MOUSE	Daxx	3570	4301	4268	3722	3394	3539		4046.33	3551.67							5	5	5	5	5	5
	Q9JII5;Q9JII5-2	DAZ-associated protein 1;Isoform 2 of DAZ-associated protein 1	DAZP1_MOUSE	Dazap1	85735	94691	91458	85203	77282	82959		90628	81814.7			mito protein domain				12	12	12	12	12	12
	P31786	Acyl-CoA-binding protein	ACBP_MOUSE	Dbi	241296	233715	168581	165117	171617	155167		214531	163967		MitoCarta3.0	targetP signal, mito protein domain, induction, coexpression	unknown	Metabolism > Lipid metabolism		9	9	8	8	6	8
	Q62418;Q62418-2;Q62418-3	Drebrin-like protein;Isoform 2 of Drebrin-like protein;Isoform 3 of Drebrin-like protein	DBNL_MOUSE	Dbnl	136637	143056	139020	106356	131312	125968		139571	121212			mito protein domain				23	24	24	24	23	24
	Q923B1	Lariat debranching enzyme	DBR1_MOUSE	Dbr1	7478	7296	7032	6268	6622	6573		7268.67	6487.67							12	13	12	14	12	13
	P53395	Lipoamide acyltransferase component of branched-chain alpha-keto acid dehydrogenase complex, mitochondrial	ODB2_MOUSE	Dbt	15141	16458	15217	13335	12941	13248		15605.3	13174.7		MitoCarta3.0	literature, APEX_matrix, targetP signal+, yeast mito homolog+, Rickettsial homolog, mito protein domain+, induction, coexpression+, MS/MS++	Matrix	Metabolism > Amino acid metabolism > Branched-chain amino acid metabolism | Metabolism > Amino acid metabolism > Branched-chain amino acid dehydrogenase complex		15	16	15	15	14	15
	Q80TR8;Q80TR8-4	DDB1- and CUL4-associated factor 1;Isoform 4 of DDB1- and CUL4-associated factor 1	DCAF1_MOUSE	Dcaf1	8549	7800	7706	6469	7822	7394		8018.33	7228.33							40	39	39	40	38	40
	Q91VU6;Q91VU6-2	DDB1- and CUL4-associated factor 11;Isoform 2 of DDB1- and CUL4-associated factor 11	DCA11_MOUSE	Dcaf11	234	218	207	169	190	210		219.667	189.667			targetP signal, mito protein domain, induction, coexpression				2	2	2	2	2	2
	Q6PAC3	DDB1- and CUL4-associated factor 13	DCA13_MOUSE	Dcaf13	15144	14581	15006	14611	15088	14410		14910.3	14703			mito protein domain				17	18	18	18	17	18
	Q80T85	DDB1- and CUL4-associated factor 5	DCAF5_MOUSE	Dcaf5	1846	2026	1902	1454	1652	1641		1924.67	1582.33			targetP signal+, mito protein domain				13	14	13	14	14	14
	P61963	DDB1- and CUL4-associated factor 7	DCAF7_MOUSE	Dcaf7	10232	10869	10775	9509	9679	9935		10625.3	9707.67			mito protein domain				8	8	8	8	8	8
	Q8N7N5	DDB1- and CUL4-associated factor 8	DCAF8_MOUSE	Dcaf8	9468	10209	9775	7809	8504	8289		9817.33	8200.67			mito protein domain				15	15	15	15	15	15
	Q8BHC4	Dephospho-CoA kinase domain-containing protein	DCAKD_MOUSE	Dcakd	7760	7062	6205	6035	6062	6078		7009	6058.33		MitoCarta3.0	GFP, yeast mito homolog, Rickettsial homolog, mito protein domain, coexpression, MS/MS	Membrane			9	9	8	8	9	9
	P43346	Deoxycytidine kinase	DCK_MOUSE	Dck	44802	45484	45981	27078	47285	35390		45422.3	36584.3			mito protein domain				13	13	13	13	13	13
	Q91YD3	mRNA-decapping enzyme 1A	DCP1A_MOUSE	Dcp1a	8637	8457	8091	6243	7894	6637		8395	6924.67			targetP signal				15	15	15	14	15	14
	Q3U564;Q3U564-2	mRNA-decapping enzyme 1B;Isoform 2 of mRNA-decapping enzyme 1B	DCP1B_MOUSE	Dcp1b	583	454	351	413	441	423		462.667	425.667							4	4	3	4	4	4
	Q9CYC6	m7GpppN-mRNA hydrolase	DCP2_MOUSE	Dcp2	7870	7380	7629	480	783	6645		7626.33	2636			mito protein domain				3	3	3	3	3	3
	Q9DAR7	m7GpppX diphosphatase	DCPS_MOUSE	Dcps	145900	132688	132809	131749	134096	134089		137132	133311							23	22	21	21	22	23
	O08788;O08788-2	Dynactin subunit 1;Isoform 2 of Dynactin subunit 1	DCTN1_MOUSE	Dctn1	29913	347767	23450	58705	285138	329746		133710	224530			targetP signal, MS/MS				49	51	49	49	49	51
	Q99KJ8	Dynactin subunit 2	DCTN2_MOUSE	Dctn2	57120	64584	62378	49814	53547	56421		61360.7	53260.7							19	21	20	21	20	20
	Q9Z0Y1	Dynactin subunit 3	DCTN3_MOUSE	Dctn3	21483	20954	19352	15603	20051	17622		20596.3	17758.7							7	7	7	7	7	7
	Q8CBY8;Q8CBY8-2	Dynactin subunit 4;Isoform 2 of Dynactin subunit 4	DCTN4_MOUSE	Dctn4	12014	12147	14754	10396	10523	12432		12971.7	11117							15	14	13	15	14	14
	Q9QZB9	Dynactin subunit 5	DCTN5_MOUSE	Dctn5	11650	10012	9555	7174	8661	8329		10405.7	8054.67			Rickettsial homolog, mito protein domain				5	5	5	5	5	5
	Q9WUB4	Dynactin subunit 6	DCTN6_MOUSE	Dctn6	10556	10249	9903	4927	6770	8882		10236	6859.67			Rickettsial homolog, mito protein domain				3	3	3	2	2	3
	Q9QY93	dCTP pyrophosphatase 1	DCTP1_MOUSE	Dctpp1	2477	2132	1948	1734	2667	2404		2185.67	2268.33							3	3	3	3	3	3
	Q9QZ73	DCN1-like protein 1	DCNL1_MOUSE	Dcun1d1	16646	16037	16104	14226	13701	14962		16262.3	14296.3							12	12	12	11	11	12
	Q8K0V2	DCN1-like protein 3	DCNL3_MOUSE	Dcun1d3	1024	1250	969	770	1147	836		1081	917.667							4	7	6	6	7	4
	Q9CXV9	DCN1-like protein 5	DCNL5_MOUSE	Dcun1d5	10305	11472	11593	9902	10089	10410		11123.3	10133.7			coexpression				7	7	8	8	8	8
	Q91X52	L-xylulose reductase	DCXR_MOUSE	Dcxr	1363	1396	1458	1156	27455	1228		1405.67	9946.33		MitoCarta3.0	APEX_matrix, targetP signal, Rickettsial homolog, mito protein domain	Matrix	Metabolism > Carbohydrate metabolism		2	3	4	3	3	3
	Q9D9Z5	DET1- and DDB1-associated protein 1	DDA1_MOUSE	Dda1	19710	17239	16421	12371	19071	15732		17790	15724.7							3	3	3	3	3	3
	Q3U1J4	DNA damage-binding protein 1	DDB1_MOUSE	Ddb1	103307	91967	92376	70733	93307	85407		95883.3	83149							59	59	58	57	58	58
	Q99J79	DNA damage-binding protein 2	DDB2_MOUSE	Ddb2	8090	7744	7499	6662	7170	7109		7777.67	6980.33			mito protein domain				13	13	13	13	13	13
	Q80Y98	Phospholipase DDHD2	DDHD2_MOUSE	Ddhd2	923	662	987	360	629	606		857.333	531.667			yeast mito homolog, mito protein domain, coexpression				6	6	6	5	6	6
	A2ADY9	Protein DDI1 homolog 2	DDI2_MOUSE	Ddi2	19938	20806	20540	17559	19461	19201		20428	18740.3			Rickettsial homolog				12	12	12	12	12	12
	O54734	Dolichyl-diphosphooligosaccharide--protein glycosyltransferase 48 kDa subunit	OST48_MOUSE	Ddost	167438	161387	152898	116454	137860	123451		160574	125922							20	20	19	21	21	20
	Q80WW9	DDRGK domain-containing protein 1	DDRGK_MOUSE	Ddrgk1	6324	6509	6371	4566	6476	6035		6401.33	5692.33			coexpression				8	8	8	7	8	8
	O35215	D-dopachrome decarboxylase	DOPD_MOUSE	Ddt	271808	251344	245611	207275	218833	235150		256254	220419			induction, coexpression, MS/MS				9	9	9	9	9	9
	Q91VR5	ATP-dependent RNA helicase DDX1	DDX1_MOUSE	Ddx1	82950	80313	79308	70546	77113	76500		80857	74719.7			yeast mito homolog, Rickettsial homolog, mito protein domain, coexpression				48	45	44	45	46	47
	Q80Y44	Probable ATP-dependent RNA helicase DDX10	DDX10_MOUSE	Ddx10	7336	7162	7157	6519	6667	7090		7218.33	6758.67			Rickettsial homolog, mito protein domain				31	32	32	32	30	32
	Q6AXC6	ATP-dependent DNA helicase DDX11	DDX11_MOUSE	Ddx11	327	287	280	228	264	239		298	243.667							5	5	5	5	5	5
	Q501J6	Probable ATP-dependent RNA helicase DDX17	DDX17_MOUSE	Ddx17	367615	357332	353079	308225	347986	338094		359342	331435			yeast mito homolog, Rickettsial homolog, mito protein domain				32	32	33	32	32	33
	Q8K363	ATP-dependent RNA helicase DDX18	DDX18_MOUSE	Ddx18	55586	52965	51726	45467	52202	49868		53425.7	49179			targetP signal, Rickettsial homolog, mito protein domain				43	42	41	42	42	41
	Q61655	ATP-dependent RNA helicase DDX19A	DD19A_MOUSE	Ddx19a	60877	63239	76376	48787	71404	69214		66830.7	63135			Rickettsial homolog, mito protein domain				30	30	29	29	30	29
	Q8R3C7	DEAD (Asp-Glu-Ala-Asp) box polypeptide 19b	Q8R3C7_MOUSE	Ddx19b	4366	4880	4218	3990	4316	2511		4488	3605.67							6	6	5	6	6	6
	Q9JJY4	Probable ATP-dependent RNA helicase DDX20	DDX20_MOUSE	Ddx20	8838	7786	8240	6516	7559	7586		8288	7220.33			Rickettsial homolog, mito protein domain				27	27	28	25	27	27
	Q9JIK5	Nucleolar RNA helicase 2	DDX21_MOUSE	Ddx21	261349	262606	257087	227470	254962	249184		260347	243872			Rickettsial homolog, mito protein domain				63	63	63	64	64	67
	D3Z0M9	DEAD (Asp-Glu-Ala-Asp) box polypeptide 23	D3Z0M9_MOUSE	Ddx23	28933	28697	28933	26953	28836	27631		28854.3	27806.7			Rickettsial homolog, mito protein domain				33	34	35	34	34	35
	Q9ESV0	ATP-dependent RNA helicase DDX24	DDX24_MOUSE	Ddx24	6454	5952	5871	4643	5554	5242		6092.33	5146.33			Rickettsial homolog, mito protein domain				25	25	24	24	25	24
	Q921N6	Probable ATP-dependent RNA helicase DDX27	DDX27_MOUSE	Ddx27	27680	27375	26990	23492	25674	25538		27348.3	24901.3			Rickettsial homolog, mito protein domain				34	34	33	33	32	32
	Q9CWT6	Probable ATP-dependent RNA helicase DDX28	DDX28_MOUSE	Ddx28	1835	1393	1328	1362	1631	1302		1518.67	1431.67		MitoCarta3.0	literature, APEX_matrix, targetP signal, Rickettsial homolog, mito protein domain	Matrix	Mitochondrial central dogma > mtRNA metabolism > mtRNA granules | Mitochondrial central dogma > Translation > Mitochondrial ribosome assembly		7	7	7	7	7	7
	Q6NZQ2	Probable ATP-dependent RNA helicase DDX31	DDX31_MOUSE	Ddx31	8940	8259	8078	18936	6136	9401		8425.67	11491			Rickettsial homolog, mito protein domain, coexpression				17	17	17	17	16	17
	Q8VDW0	ATP-dependent RNA helicase DDX39A	DX39A_MOUSE	Ddx39a	570598	542115	534858	491257	483746	497033		549190	490679			Rickettsial homolog, mito protein domain				27	26	25	25	26	25
	Q9Z1N5	Spliceosome RNA helicase Ddx39b	DX39B_MOUSE	Ddx39b	148202	136400	125824	131610	137272	131941		136809	133608			Rickettsial homolog, mito protein domain				15	15	16	15	15	16
	Q62167	ATP-dependent RNA helicase DDX3X	DDX3X_MOUSE	Ddx3x	259767	277320	270854	209722	246519	238707		269314	231649			Rickettsial homolog, mito protein domain				45	45	45	45	44	45
	Q62095	ATP-dependent RNA helicase DDX3Y	DDX3Y_MOUSE	Ddx3y	6398	6462	6062	4557	5591	5820		6307.33	5322.67			Rickettsial homolog, mito protein domain, coexpression				11	11	10	11	10	11
	Q91VN6	Probable ATP-dependent RNA helicase DDX41	DDX41_MOUSE	Ddx41	13678	12125	11770	10543	11024	11204		12524.3	10923.7			yeast mito homolog, Rickettsial homolog, mito protein domain				26	26	26	27	27	27
	Q810A7	ATP-dependent RNA helicase DDX42	DDX42_MOUSE	Ddx42	38028	38406	39282	32882	37966	36116		38572	35654.7			yeast mito homolog, Rickettsial homolog, mito protein domain				37	37	38	38	38	38
	Q569Z5	Probable ATP-dependent RNA helicase DDX46	DDX46_MOUSE	Ddx46	54915	56735	52457	51962	48486	49351		54702.3	49933			yeast mito homolog, Rickettsial homolog, mito protein domain				61	62	60	63	58	62
	Q9CWX9	Probable ATP-dependent RNA helicase DDX47	DDX47_MOUSE	Ddx47	42210	41034	42380	39024	40444	40004		41874.7	39824			Rickettsial homolog, mito protein domain				20	20	20	20	20	20
	Q4FZF3	Probable ATP-dependent RNA helicase DDX49	DDX49_MOUSE	Ddx49	7502	7465	6819	6405	6832	7212		7262	6816.33			Rickettsial homolog, mito protein domain				13	14	13	14	14	13
	Q61656	Probable ATP-dependent RNA helicase DDX5	DDX5_MOUSE	Ddx5	433874	408117	402195	313580	378960	370233		414729	354258							39	37	37	40	38	38
	Q99MJ9	ATP-dependent RNA helicase DDX50	DDX50_MOUSE	Ddx50	11176	9020	7892	6172	7276	7076		9362.67	6841.33			Rickettsial homolog, mito protein domain				19	20	20	20	20	20
	Q6P9R1	ATP-dependent RNA helicase DDX51	DDX51_MOUSE	Ddx51	11443	11162	11042	6849	12924	15040		11215.7	11604.3			Rickettsial homolog, mito protein domain				20	20	20	20	20	20
	Q8K301	Probable ATP-dependent RNA helicase DDX52	DDX52_MOUSE	Ddx52	14256	13222	12197	11870	13236	12722		13225	12609.3			Rickettsial homolog, mito protein domain				20	21	21	20	21	21
	Q8K4L0	ATP-dependent RNA helicase DDX54	DDX54_MOUSE	Ddx54	8560	8586	8881	6816	8615	7949		8675.67	7793.33			Rickettsial homolog, mito protein domain				26	28	27	27	27	28
	Q6ZPL9	ATP-dependent RNA helicase DDX55	DDX55_MOUSE	Ddx55	4021	4734	3467	4262	4728	4102		4074	4364			Rickettsial homolog, mito protein domain				12	13	12	13	13	13
	Q9D0R4	Probable ATP-dependent RNA helicase DDX56	DDX56_MOUSE	Ddx56	28284	36689	30390	30481	30917	29029		31787.7	30142.3			Rickettsial homolog, mito protein domain				18	18	18	18	17	19
	Q6Q899	Antiviral innate immune response receptor RIG-I	DDX58_MOUSE	Ddx58	22627	22699	21437	14771	19230	18540		22254.3	17513.7		mito-interacting	mito protein domain				38	38	38	38	38	38
	Q9DBN9	Probable ATP-dependent RNA helicase DDX59	DDX59_MOUSE	Ddx59	258	252	223	256	207	201		244.333	221.333			Rickettsial homolog, mito protein domain				3	3	3	3	3	3
	P54823	Probable ATP-dependent RNA helicase DDX6	DDX6_MOUSE	Ddx6	126013	129165	125432	91998	111982	113600		126870	105860			Rickettsial homolog, mito protein domain				29	30	29	29	28	28
	Q9CQ62	2,4-dienoyl-CoA reductase, mitochondrial	DECR_MOUSE	Decr1	20077	19824	18378	21162	18297	18136		19426.3	19198.3		MitoCarta3.0	literature, APEX_matrix, targetP signal, Rickettsial homolog, mito protein domain, coexpression+, MS/MS++	Matrix	Metabolism > Lipid metabolism > Fatty acid oxidation		12	12	11	12	10	11
	Q9WV68	Peroxisomal 2,4-dienoyl-CoA reductase	DECR2_MOUSE	Decr2	892	797	5231	3663	5309	4244		2306.67	4405.33			Rickettsial homolog, mito protein domain				3	3	3	3	3	3
	Q8C2K1	Differentially expressed in FDCP 6	DEFI6_MOUSE	Def6	27670	27592	27022	24373	26558	27058		27428	25996.3			mito protein domain				34	32	32	33	32	32
	O09005	Sphingolipid delta(4)-desaturase DES1	DEGS1_MOUSE	Degs1	12460	13375	13475	8016	10259	10764		13103.3	9679.67			mito protein domain				4	4	4	4	4	4
	Q7TNV0	Protein DEK	DEK_MOUSE	Dek	259333	274262	277765	265750	268110	269490		270453	267783			mito protein domain				25	24	23	24	24	25
	Q9D8N2	DENN domain-containing protein 10	DEN10_MOUSE	Dennd10	6039	6838	6022	4885	5305	5190		6299.67	5126.67							7	7	7	7	7	7
	Q3UHG7;Q3UHG7-2	DENN domain-containing protein 11;Isoform 2 of DENN domain-containing protein 11	DEN11_MOUSE	Dennd11	1891	1618	1484	1120	1362	1296		1664.33	1259.33							5	5	4	4	4	4
	Q3U1T9	DENN domain-containing protein 1B	DEN1B_MOUSE	Dennd1b	1035	1119	1023	700	830	856		1059	795.333							5	5	5	6	4	5
	Q8CFK6	DENN domain-containing protein 1C	DEN1C_MOUSE	Dennd1c	3470	2977	2955	2347	2712	2499		3134	2519.33							8	8	8	8	7	7
	Q91VV4	DENN domain-containing protein 2D	DEN2D_MOUSE	Dennd2d	9434	9504	9537	7364	9101	8318		9491.67	8261			targetP signal				12	13	13	12	12	13
	A2RT67	DENN domain-containing protein 3	DEND3_MOUSE	Dennd3	4	43	42	44	51	99		29.6667	64.6667			mito protein domain				1	2	1	2	2	1
	E9Q8V6	DENN/MADD domain-containing 4A	E9Q8V6_MOUSE	Dennd4a	3490	3245	3156	2304	3318	2988		3297	2870							35	33	35	32	33	34
	Q3U1Y4	DENN domain-containing protein 4B	DEN4B_MOUSE	Dennd4b	3717	3879	3737	2779	2847	2951		3777.67	2859							16	15	16	16	15	14
	A6H8H2-2	Isoform 2 of DENN domain-containing protein 4C	DEN4C_MOUSE	Dennd4c	5045	4810	4645	3259	4443	4017		4833.33	3906.33							41	42	42	42	39	39
	Q9CQJ6	Density-regulated protein	DENR_MOUSE	Denr	55997	57052	55871	48191	48930	50632		56306.7	49251							10	10	10	10	9	10
	Q8BH88	DEP domain-containing protein 1B	DEP1B_MOUSE	Depdc1b	1017	769	795	579	861	827		860.333	755.667			mito protein domain				4	4	4	4	4	4
	P61460;P61460-2	GATOR complex protein DEPDC5;Isoform 2 of GATOR complex protein DEPDC5	DEPD5_MOUSE	Depdc5	295	121	86	152	205	245		167.333	200.667							4	3	2	3	3	5
	Q91YP3	Deoxyribose-phosphate aldolase	DEOC_MOUSE	Dera	27865	28809	26371	21627	23710	24181		27681.7	23172.7							15	15	15	15	15	15
	Q99J56	Derlin-1	DERL1_MOUSE	Derl1	16644	17037	14869	10836	13150	13373		16183.3	12453							5	5	5	5	5	5
	P0CG14	Decreased expression in renal and prostate cancer protein	DERPC_MOUSE	Derpc	4199	5295	5093	4168	4484	4251		4862.33	4301							8	8	8	8	8	8
	P31001	Desmin	DESM_MOUSE	Des	0	198	190	384	146	322		129.333	284			targetP signal, induction				Filtered	1	1	2	2	2
	Q9CQT7	Desumoylating isopeptidase 1	DESI1_MOUSE	Desi1	3126	2448	2426	1718	2501	2486		2666.67	2235			induction				2	2	2	2	2	2
	O54786	DNA fragmentation factor subunit alpha	DFFA_MOUSE	Dffa	5901	6735	6127	5350	5565	5115		6254.33	5343.33			induction				8	8	8	8	8	8
	O54788	DNA fragmentation factor subunit beta	DFFB_MOUSE	Dffb	1422	1537	1326	1444	1133	1393		1428.33	1323.33			targetP signal				2	2	2	2	2	2
	Q9Z2A7	Diacylglycerol O-acyltransferase 1	DGAT1_MOUSE	Dgat1	934	322	400	306	91	208		552	201.667			induction				2	2	2	2	1	2
	Q9EQM6	Microprocessor complex subunit DGCR8	DGCR8_MOUSE	Dgcr8	5106	4449	5069	3300	4676	4413		4874.67	4129.67			mito protein domain				12	12	12	12	12	12
	O88673	Diacylglycerol kinase alpha	DGKA_MOUSE	Dgka	22982	24011	21903	17864	19658	20205		22965.3	19242.3			mito protein domain				29	30	30	30	30	29
	A0A2I3BQ43;A0A2I3BQ48;A0JP53;D3YXJ0	Diacylglycerol kinase	A0A2I3BQ43_MOUSE;A0A2I3BQ48_MOUSE;A0JP53_MOUSE;D3YXJ0_MOUSE	Dgkh	0	1205	68	0	18	0		424.333	6							Filtered	2	2	Filtered	1	Filtered
	Q80UP3	Diacylglycerol kinase zeta	DGKZ_MOUSE	Dgkz	4940	5657	5060	4741	5085	5179		5219	5001.67			mito protein domain				15	16	15	16	15	16
	Q8BH86	D-glutamate cyclase, mitochondrial	GLUCM_MOUSE	Dglucy	2954	3443	3266	2734	2343	2155		3221	2410.67		MitoCarta3.0	literature, APEX_matrix, targetP signal+, coexpression, MS/MS++	Matrix	Metabolism > Amino acid metabolism		11	10	11	11	10	11
	Q9QX60;Q9QX60-2	Deoxyguanosine kinase, mitochondrial;Isoform 2 of Deoxyguanosine kinase, mitochondrial	DGUOK_MOUSE	Dguok	12259	9861	8406	30724	10003	16013		10175.3	18913.3		MitoCarta3.0	literature, APEX_matrix, targetP signal, mito protein domain, MS/MS++	Matrix	Metabolism > Nucleotide metabolism > Nucleotide synthesis and processing		4	4	4	4	4	4
	Q8VCH6	Delta(24)-sterol reductase	DHC24_MOUSE	Dhcr24	6438	5711	5743	3552	5514	4930		5964	4665.33			yeast mito homolog+, mito protein domain, coexpression				11	11	11	10	11	11
	O88455	7-dehydrocholesterol reductase	DHCR7_MOUSE	Dhcr7	9290	8880	8680	6414	7678	7510		8950	7200.67			coexpression				6	6	6	6	6	6
	P00375	Dihydrofolate reductase	DYR_MOUSE	Dhfr	188113	190076	188388	164751	172846	167944		188859	168514			yeast mito homolog, mito protein domain+				12	12	12	13	12	12
	O35435	Dihydroorotate dehydrogenase (quinone), mitochondrial	PYRD_MOUSE	Dhodh	8417	8584	8282	7121	8299	7814		8427.67	7744.67		MitoCarta3.0	literature, mito protein domain, MS/MS++	MIM	Metabolism > Nucleotide metabolism > Nucleotide synthesis and processing | Metabolism > Electron carriers > Q-linked reactions, other		14	14	13	12	13	14
	Q3TXU5	Deoxyhypusine synthase	DHYS_MOUSE	Dhps	5740	5733	5485	4098	5117	5262		5652.67	4825.67							12	12	12	11	12	12
	Q99L04	Dehydrogenase/reductase SDR family member 1	DHRS1_MOUSE	Dhrs1	24829	23329	22692	19090	20947	21219		23616.7	20418.7		MitoCarta3.0	targetP signal, Rickettsial homolog, mito protein domain, MS/MS++	MIM	Metabolism > Lipid metabolism > Cholesterol, bile acid, steroid synthesis		17	17	17	17	17	17
	Q3U0B3	Dehydrogenase/reductase SDR family member 11	DHR11_MOUSE	Dhrs11	1210	940	1191	712	1105	1087		1113.67	968			targetP signal, Rickettsial homolog, mito protein domain, coexpression				3	2	3	3	2	3
	Q5SS80	Dehydrogenase/reductase SDR family member 13	DHR13_MOUSE	Dhrs13	6128	6535	3873	4167	5445	3264		5512	4292			yeast mito homolog+, Rickettsial homolog, mito protein domain				11	11	10	11	10	10
	Q99LB2	Dehydrogenase/reductase SDR family member 4	DHRS4_MOUSE	Dhrs4	24912	24512	23659	21013	22365	23697		24361	22358.3		MitoCarta3.0	targetP signal+, Rickettsial homolog, mito protein domain, coexpression, MS/MS++	Matrix	Metabolism > Vitamin metabolism > Vitamin A metabolism		11	10	10	11	10	10
	Q9CXR1	Dehydrogenase/reductase SDR family member 7	DHRS7_MOUSE	Dhrs7	13434	12962	12380	11036	12615	12106		12925.3	11919			Rickettsial homolog, mito protein domain, coexpression, MS/MS				9	9	9	9	9	9
	Q99J47;Q99J47-2	Dehydrogenase/reductase SDR family member 7B;Isoform 2 of Dehydrogenase/reductase SDR family member 7B	DRS7B_MOUSE	Dhrs7b	12025	11904	11343	10010	10806	10954		11757.3	10590		MitoCarta3.0	Rickettsial homolog, mito protein domain, induction, coexpression	Membrane			11	11	11	11	11	11
	Q8VBZ0	Dehydrogenase/reductase SDR family member on chromosome X homolog	DHRSX_MOUSE	Dhrsx	1592	1405	1347	1138	1201	1168		1448	1169							5	5	5	5	5	5
	O35286	Pre-mRNA-splicing factor ATP-dependent RNA helicase DHX15	DHX15_MOUSE	Dhx15	143231	136524	133638	119367	129952	131066		137798	126795			yeast mito homolog, mito protein domain				39	39	39	40	37	39
	G3X8X0	DEAH (Asp-Glu-Ala-His) box polypeptide 16	G3X8X0_MOUSE	Dhx16	13264	14291	13246	11919	11777	11722		13600.3	11806			mito protein domain				31	33	33	33	32	32
	Q6PGC1	ATP-dependent RNA helicase DHX29	DHX29_MOUSE	Dhx29	9939	8181	7575	5816	7263	7301		8565	6793.33			targetP signal, yeast mito homolog, mito protein domain				48	48	47	47	46	47
	Q99PU8-2	Isoform 2 of ATP-dependent RNA helicase DHX30	DHX30_MOUSE	Dhx30	9056	9081	8738	7199	7788	7949		8958.33	7645.33		MitoCarta3.0	literature, targetP signal+, yeast mito homolog, mito protein domain	Matrix	Mitochondrial central dogma > mtRNA metabolism > mtRNA granules | Mitochondrial central dogma > Translation > Mitochondrial ribosome assembly		46	45	45	43	43	46
	Q80VY9	ATP-dependent RNA helicase DHX33	DHX33_MOUSE	Dhx33	5508	5222	5573	4311	5647	4693		5434.33	4883.67			mito protein domain, coexpression				14	15	16	16	15	15
	Q9DBV3	Probable ATP-dependent RNA helicase DHX34	DHX34_MOUSE	Dhx34	433	514	444	450	406	441		463.667	432.333			mito protein domain				6	8	8	8	7	8
	A2ACQ1;Q8K1G9	DEAH (Asp-Glu-Ala-His) box polypeptide 35	A2ACQ1_MOUSE;Q8K1G9_MOUSE	Dhx35	2360	2412	2351	2133	1876	1916		2374.33	1975			mito protein domain				9	9	9	9	8	8
	Q8VHK9	ATP-dependent DNA/RNA helicase DHX36	DHX36_MOUSE	Dhx36	9685	8354	8410	7423	7956	8098		8816.33	7825.67			yeast mito homolog, mito protein domain, coexpression				27	28	28	28	27	28
	Q6NZL1	DEAH (Asp-Glu-Ala-His) box polypeptide 37	Q6NZL1_MOUSE	Dhx37	4898	5123	5021	4076	4892	4581		5014	4516.33			yeast mito homolog, mito protein domain				24	23	24	24	23	23
	Q80X98	DEAH (Asp-Glu-Ala-His) box polypeptide 38	Q80X98_MOUSE	Dhx38	8545	8559	8038	7188	8009	7390		8380.67	7529			mito protein domain				34	34	34	34	32	33
	Q6PE54	Probable ATP-dependent RNA helicase DHX40	DHX40_MOUSE	Dhx40	287	231	224	207	242	211		247.333	220			targetP signal, mito protein domain				2	2	2	3	2	2
	Q6P5D3;Q6P5D3-2	Putative ATP-dependent RNA helicase DHX57;Isoform 2 of Putative ATP-dependent RNA helicase DHX57	DHX57_MOUSE	Dhx57	1054	1088	1108	909	953	1027		1083.33	963			yeast mito homolog, mito protein domain				7	7	7	7	7	7
	Q99J87	Probable ATP-dependent RNA helicase DHX58	DHX58_MOUSE	Dhx58	1410	1413	1291	1012	1024	1077		1371.33	1037.67			Rickettsial homolog, mito protein domain				7	7	7	7	6	7
	A2A4P0	ATP-dependent RNA helicase DHX8	DHX8_MOUSE	Dhx8	8588	7416	7122	6132	6998	6835		7708.67	6655			Rickettsial homolog, mito protein domain				31	31	31	30	30	29
	O70133	ATP-dependent RNA helicase A	DHX9_MOUSE	Dhx9	147139	147951	146562	132216	135476	133329		147217	133674			yeast mito homolog, mito protein domain				61	59	60	60	59	56
	Q9JIQ3	Diablo homolog, mitochondrial	DBLOH_MOUSE	Diablo	8830	10404	8662	7335	7844	7852		9298.67	7677		MitoCarta3.0	literature, APEX_IMS, targetP signal+, mito protein domain+, MS/MS	IMS	Mitochondrial dynamics and surveillance > Apoptosis		6	6	6	5	6	6
	O08808	Protein diaphanous homolog 1	DIAP1_MOUSE	Diaph1	67555	67272	64601	48003	56277	56176		66476	53485.3							63	64	62	64	63	64
	O70566	Protein diaphanous homolog 2	DIAP2_MOUSE	Diaph2	608	590	522	546	657	637		573.333	613.333							8	8	8	8	9	9
	Q9Z207	Protein diaphanous homolog 3	DIAP3_MOUSE	Diaph3	1693	1472	1468	1221	1504	1328		1544.33	1351							15	16	15	16	16	16
	Q8R418	Endoribonuclease Dicer	DICER_MOUSE	Dicer1	2481	2513	2147	1819	2488	2184		2380.33	2163.67							19	20	20	21	21	21
	Q8C9B9	Death-inducer obliterator 1	DIDO1_MOUSE	Dido1	3292	3351	3224	2895	3551	3219		3289	3221.67							31	33	32	32	33	32
	Q8BTT6	Digestive organ expansion factor homolog	DIEXF_MOUSE	Diexf	6208	5938	5469	5337	6179	5885		5871.67	5800.33							23	22	22	24	24	23
	Q9D0D4	Probable dimethyladenosine transferase	DIM1_MOUSE	Dimt1	26429	25108	25279	23375	25826	25340		25605.3	24847			Rickettsial homolog, mito protein domain				16	16	16	16	16	15
	Q3UH60	Disco-interacting protein 2 homolog B	DIP2B_MOUSE	Dip2b	1966	2032	1991	1808	2189	1981		1996.33	1992.67			mito protein domain				17	17	17	16	17	16
	Q3USZ8	Divergent protein kinase domain 2A	DIK2A_MOUSE	Dipk2a	4151	3801	3777	2961	3357	3205		3909.67	3174.33							12	12	11	12	10	11
	Q9CSH3	Exosome complex exonuclease RRP44	RRP44_MOUSE	Dis3	29578	27588	27873	26234	28422	27170		28346.3	27275.3			yeast mito homolog, mito protein domain				47	47	44	48	45	46
	Q8C0S1	DIS3-like exonuclease 1	DI3L1_MOUSE	Dis3l	1793	1448	1443	1042	1466	1351		1561.33	1286.33			targetP signal, yeast mito homolog				12	12	12	12	12	12
	Q8CI75;Q8CI75-2	DIS3-like exonuclease 2;Isoform 2 of DIS3-like exonuclease 2	DI3L2_MOUSE	Dis3l2	27096	20850	6675	21479	17452	7411		18207	15447.3			yeast mito homolog				24	23	23	24	23	23
	Q9ESX5	H/ACA ribonucleoprotein complex subunit DKC1	DKC1_MOUSE	Dkc1	92345	87698	89486	97620	87259	88953		89843	91277.3			Rickettsial homolog, mito protein domain				27	27	27	28	26	26
	Q8BMF4	Dihydrolipoyllysine-residue acetyltransferase component of pyruvate dehydrogenase complex, mitochondrial	ODP2_MOUSE	Dlat	48847	51759	49841	45403	44795	46210		50149	45469.3		MitoCarta3.0	literature, APEX_matrix, targetP signal, yeast mito homolog+, Rickettsial homolog, mito protein domain+, induction, coexpression++, MS/MS++	Matrix	Metabolism > Carbohydrate metabolism > Pyruvate metabolism		20	21	20	21	21	21
	O08749	Dihydrolipoyl dehydrogenase, mitochondrial	DLDH_MOUSE	Dld	84443	89501	83051	85324	78960	80034		85665	81439.3		MitoCarta3.0	literature, APEX_matrix, targetP signal, yeast mito homolog, Rickettsial homolog, mito protein domain, induction, coexpression++, MS/MS++	Matrix	Metabolism > Carbohydrate metabolism > Pyruvate metabolism | Metabolism > Carbohydrate metabolism > TCA cycle | Metabolism > Amino acid metabolism > Branched-chain amino acid metabolism | Metabolism > Amino acid metabolism > Branched-chain amino acid dehydrogenase complex | Metabolism > Amino acid metabolism > Lysine metabolism | Metabolism > Amino acid metabolism > Glycine metabolism | Metabolis…		22	22	22	24	22	23
	Q811D0-2;Q811D0-3	Isoform 2 of Disks large homolog 1;Isoform 3 of Disks large homolog 1	DLG1_MOUSE	Dlg1	11069	9001	8872	7664	9414	8911		9647.33	8663			targetP signal, Rickettsial homolog, mito protein domain				19	20	19	19	20	20
	B1AZP2;B1AZP2-2;B1AZP2-3	Disks large-associated protein 4;Isoform 2 of Disks large-associated protein 4;Isoform 3 of Disks large-associated protein 4	DLGP4_MOUSE	Dlgap4	1454	1600	1525	1180	1720	1486		1526.33	1462							8	9	9	9	9	8
	Q8K4R9	Disks large-associated protein 5	DLGP5_MOUSE	Dlgap5	8045	7840	8592	5767	8733	7787		8159	7429			targetP signal				16	16	16	15	17	17
	Q9D2G2	Dihydrolipoyllysine-residue succinyltransferase component of 2-oxoglutarate dehydrogenase complex, mitochondrial	ODO2_MOUSE	Dlst	51632	62014	55463	56050	47135	50372		56369.7	51185.7		MitoCarta3.0	literature, APEX_IMS, APEX_matrix, targetP signal, yeast mito homolog+, Rickettsial homolog, mito protein domain+, induction, coexpression++, MS/MS+	Matrix	Metabolism > Carbohydrate metabolism > TCA cycle | Metabolism > Amino acid metabolism > Lysine metabolism		17	17	15	18	15	18
	Q9D7K5	Distal membrane-arm assembly complex protein 2	DMAC2_MOUSE	Dmac2	4010	5237	5434	1326	2693	2212		4893.67	2077		MitoCarta3.0	APEX_matrix, GFP, targetP signal, induction, MS/MS	MIM	OXPHOS > Complex I > CI assembly factors | OXPHOS > OXPHOS assembly factors		3	3	3	3	2	3
	Q9JI44	DNA methyltransferase 1-associated protein 1	DMAP1_MOUSE	Dmap1	7518	6959	6868	5954	6817	7207		7115	6659.33							10	10	10	10	10	10
	Q6PNC0	DmX-like protein 1	DMXL1_MOUSE	Dmxl1	135	107	109	82	107	98		117	95.6667			mito protein domain, induction				3	3	3	3	3	3
	Q6ZQJ5	DNA replication ATP-dependent helicase/nuclease DNA2	DNA2_MOUSE	Dna2	3936	3087	3575	2029	3452	3255		3532.67	2912		MitoCarta3.0	literature, mito protein domain	Matrix	Mitochondrial central dogma > mtDNA maintenance > mtDNA replication | Metabolism > Metals and cofactors > Fe-S-containing proteins		11	9	10	7	9	10
	B9EJR8	Dynein assembly factor 5, axonemal	DAAF5_MOUSE	Dnaaf5	4870	4670	4821	3519	4646	4438		4787	4201							22	21	22	21	22	22
	P63037	DnaJ homolog subfamily A member 1	DNJA1_MOUSE	Dnaja1	112935	103204	107545	70478	105153	102358		107895	92663			Rickettsial homolog, mito protein domain				25	25	24	23	24	24
	Q9QYJ0	DnaJ homolog subfamily A member 2	DNJA2_MOUSE	Dnaja2	129083	122490	121332	91855	111933	113706		124302	105831			Rickettsial homolog, mito protein domain, coexpression				22	22	22	23	22	23
	Q99M87	DnaJ homolog subfamily A member 3, mitochondrial	DNJA3_MOUSE	Dnaja3	12204	12005	12019	10118	11839	11273		12076	11076.7		MitoCarta3.0	literature, APEX_matrix, targetP signal, Rickettsial homolog, mito protein domain, induction, coexpression++, MS/MS+	Matrix	Protein import, sorting and homeostasis > Protein homeostasis > Chaperones		13	13	13	12	13	13
	Q9QYJ3	DnaJ homolog subfamily B member 1	DNJB1_MOUSE	Dnajb1	43043	42399	42409	33222	40160	39790		42617	37724			Rickettsial homolog, mito protein domain				20	20	20	20	20	20
	Q99KV1	DnaJ homolog subfamily B member 11	DJB11_MOUSE	Dnajb11	64199	65238	65636	44789	59000	57122		65024.3	53637			Rickettsial homolog, mito protein domain, coexpression				16	16	16	17	16	16
	Q9QYI4	DnaJ homolog subfamily B member 12	DJB12_MOUSE	Dnajb12	360	465	513	323	491	387		446	400.333			Rickettsial homolog, mito protein domain				4	4	4	4	3	4
	Q9D832	DnaJ homolog subfamily B member 4	DNJB4_MOUSE	Dnajb4	2942	4796	3906	3404	3486	3409		3881.33	3433			Rickettsial homolog, mito protein domain, coexpression				5	7	6	7	6	7
	O54946	DnaJ homolog subfamily B member 6	DNJB6_MOUSE	Dnajb6	20972	21562	21943	15996	21149	19617		21492.3	18920.7			yeast mito homolog, Rickettsial homolog, mito protein domain				16	15	16	15	14	16
	Q61712	DnaJ homolog subfamily C member 1	DNJC1_MOUSE	Dnajc1	5126	5019	5059	3981	4333	4076		5068	4130			targetP signal, Rickettsial homolog, mito protein domain				10	10	10	10	10	10
	Q9DC23	DnaJ homolog subfamily C member 10	DJC10_MOUSE	Dnajc10	2349	2217	2122	1586	1981	1965		2229.33	1844			Rickettsial homolog, mito protein domain				16	16	16	15	16	16
	Q5U458	DnaJ homolog subfamily C member 11	DJC11_MOUSE	Dnajc11	12899	12402	10266	10096	10774	10365		11855.7	10411.7		MitoCarta3.0	GFP, yeast mito homolog+, Rickettsial homolog, mito protein domain, coexpression, MS/MS++	MOM	Protein import, sorting and homeostasis > Protein import and sorting | Mitochondrial dynamics and surveillance > Intramitochondrial membrane interactions		19	19	18	19	19	19
	G3X922	DnaJ heat shock protein family (Hsp40) member C13	G3X922_MOUSE	Dnajc13	11714	10471	10998	8579	9854	9317		11061	9250							72	73	73	71	72	71
	Q78YY6	DnaJ homolog subfamily C member 15	DJC15_MOUSE	Dnajc15	8772	7248	7916	4225	8379	7153		7978.67	6585.67		MitoCarta3.0	GFP, yeast mito homolog, mito protein domain, induction, coexpression, MS/MS+	MIM	Protein import, sorting and homeostasis > Protein import and sorting > Import motor		4	4	4	4	4	4
	Q91WT4	DnaJ homolog subfamily C member 17	DJC17_MOUSE	Dnajc17	7220	6368	6367	5383	6007	5727		6651.67	5705.67			Rickettsial homolog, mito protein domain				7	7	7	7	7	7
	Q9CQV7;Q9CQV7-2;Q9CQV7-3	Mitochondrial import inner membrane translocase subunit TIM14;Isoform 2 of Mitochondrial import inner membrane translocase subunit TIM14;Isoform 3 of Mitochondrial import inner membrane translocase subunit TIM14	TIM14_MOUSE	Dnajc19	12143	12199	11932	12330	12335	13381		12091.3	12682		MitoCarta3.0	literature, APEX_matrix, targetP signal, yeast mito homolog, mito protein domain, MS/MS++	MIM	Protein import, sorting and homeostasis > Protein import and sorting > Import motor		4	4	4	4	4	4
	P54103	DnaJ homolog subfamily C member 2	DNJC2_MOUSE	Dnajc2	36802	37159	36980	30123	35818	34538		36980.3	33493			yeast mito homolog, Rickettsial homolog, mito protein domain				31	31	28	30	29	30
	E9Q8D0	DnaJ homolog subfamily C member 21	DJC21_MOUSE	Dnajc21	1934	1790	1909	1245	1950	1829		1877.67	1674.67			yeast mito homolog, Rickettsial homolog, mito protein domain, coexpression				9	9	9	9	8	9
	Q91ZF0	DnaJ homolog subfamily C member 24	DJC24_MOUSE	Dnajc24	4393	4076	3728	3345	3882	3758		4065.67	3661.67			Rickettsial homolog, mito protein domain				3	3	3	3	3	3
	Q91YW3	DnaJ homolog subfamily C member 3	DNJC3_MOUSE	Dnajc3	32803	34347	34655	21331	29062	28008		33935	26133.7			yeast mito homolog+, Rickettsial homolog, mito protein domain				28	27	27	28	27	27
	P60904	DnaJ homolog subfamily C member 5	DNJC5_MOUSE	Dnajc5	7489	6905	6683	5716	7633	7296		7025.67	6881.67			Rickettsial homolog, mito protein domain				6	6	5	6	6	6
	Q9QYI3	DnaJ homolog subfamily C member 7	DNJC7_MOUSE	Dnajc7	58823	58476	57054	46259	56243	54928		58117.7	52476.7			Rickettsial homolog, mito protein domain				36	38	36	38	36	37
	Q6NZB0	DnaJ homolog subfamily C member 8	DNJC8_MOUSE	Dnajc8	94627	87477	90724	76555	97957	88738		90942.7	87750			Rickettsial homolog, mito protein domain				14	14	14	14	14	13
	Q91WN1	DnaJ homolog subfamily C member 9	DNJC9_MOUSE	Dnajc9	145673	141642	146655	138249	150674	143568		144657	144164			yeast mito homolog, Rickettsial homolog, mito protein domain				20	20	20	20	19	20
	Q8K1M6-3	Isoform 3 of Dynamin-1-like protein	DNM1L_MOUSE	Dnm1l	1257	1096	1147	898	1375	1190		1166.67	1154.33		MitoCarta3.0	literature, yeast mito homolog+, mito protein domain, induction	MOM	Mitochondrial dynamics and surveillance > Fission		2	2	2	2	2	2
	Q8K1M6-2	Isoform 2 of Dynamin-1-like protein	DNM1L_MOUSE	Dnm1l	48909	45029	43954	34544	43391	40067		45964	39334		MitoCarta3.0	literature, yeast mito homolog+, mito protein domain, induction	MOM	Mitochondrial dynamics and surveillance > Fission		41	41	41	41	40	40
	P39054	Dynamin-2	DYN2_MOUSE	Dnm2	88329	85295	80012	70278	73455	74157		84545.3	72630			yeast mito homolog+, mito protein domain				50	51	50	50	48	50
	Q8BZ98;Q8BZ98-2	Dynamin-3;Isoform 2 of Dynamin-3	DYN3_MOUSE	Dnm3	167	153	115	123	104	99		145	108.667			yeast mito homolog+, mito protein domain				2	2	1	2	1	2
	P13864	DNA (cytosine-5)-methyltransferase 1	DNMT1_MOUSE	Dnmt1	104738	98936	105031	78218	103906	98011		102902	93378.3			targetP signal, mito protein domain				100	99	97	99	92	96
	O88508	DNA (cytosine-5)-methyltransferase 3A	DNM3A_MOUSE	Dnmt3a	5109	5592	5407	4907	4728	4870		5369.33	4835							22	22	22	22	22	22
	O88509;O88509-2;O88509-3;O88509-4	DNA (cytosine-5)-methyltransferase 3B;Isoform 2 of DNA (cytosine-5)-methyltransferase 3B;Isoform 3 of DNA (cytosine-5)-methyltransferase 3B;Isoform 4 of DNA (cytosine-5)-methyltransferase 3B	DNM3B_MOUSE	Dnmt3b	122	176	174	170	124	148		157.333	147.333							2	2	2	2	2	2
	Q9Z2W0	Aspartyl aminopeptidase	DNPEP_MOUSE	Dnpep	26776	27864	27562	24381	24826	25986		27400.7	25064.3			targetP signal				13	14	14	14	14	13
	Q80VJ3	2'-deoxynucleoside 5'-phosphate N-hydrolase 1	DNPH1_MOUSE	Dnph1	12267	5737	5608	11356	10728	11407		7870.67	11163.7							8	8	7	8	8	8
	Q99LB0	Deoxynucleotidyltransferase terminal-interacting protein 1	TDIF1_MOUSE	Dnttip1	2693	3334	2864	3637	2661	2460		2963.67	2919.33							5	5	5	5	5	5
	Q8R2M2	Deoxynucleotidyltransferase terminal-interacting protein 2	TDIF2_MOUSE	Dnttip2	13843	13537	13768	11784	14676	13296		13716	13252			targetP signal				25	26	27	27	26	27
	Q8BZN6-4	Isoform 4 of Dedicator of cytokinesis protein 10	DOC10_MOUSE	Dock10	94	116	81	133	162	188		97	161			targetP signal+, yeast mito homolog, mito protein domain				2	2	2	2	2	2
	Q8BZN6;Q8BZN6-2;Q8BZN6-3	Dedicator of cytokinesis protein 10;Isoform 2 of Dedicator of cytokinesis protein 10;Isoform 3 of Dedicator of cytokinesis protein 10	DOC10_MOUSE	Dock10	25311	24594	23947	19539	22939	22555		24617.3	21677.7			targetP signal+, yeast mito homolog, mito protein domain				88	86	85	83	79	84
	A2AF47	Dedicator of cytokinesis protein 11	DOC11_MOUSE	Dock11	17010	16790	16558	14313	16522	18815		16786	16550			yeast mito homolog, mito protein domain				76	78	78	77	74	78
	Q8C3J5	Dedicator of cytokinesis protein 2	DOCK2_MOUSE	Dock2	84843	83669	81043	64790	71405	71130		83185	69108.3			yeast mito homolog, mito protein domain				101	101	100	99	97	98
	B2RY04	Dedicator of cytokinesis protein 5	DOCK5_MOUSE	Dock5	946	912	883	564	759	752		913.667	691.667			yeast mito homolog, mito protein domain				15	15	15	14	15	15
	Q8C147	Dedicator of cytokinesis protein 8	DOCK8_MOUSE	Dock8	42065	41018	39673	30834	37084	36713		40918.7	34877			targetP signal, yeast mito homolog				89	89	88	87	86	88
	Q8BIK4;Q8BIK4-2	Dedicator of cytokinesis protein 9;Isoform 2 of Dedicator of cytokinesis protein 9	DOCK9_MOUSE	Dock9	1876	1738	1721	1465	1401	1428		1778.33	1431.33							7	7	8	5	6	6
	Q99LN9	Deoxyhypusine hydroxylase	DOHH_MOUSE	Dohh	8737	9068	7096	6137	9336	5563		8300.33	7012			coexpression				11	11	11	11	11	10
	P97465	Docking protein 1	DOK1_MOUSE	Dok1	4076	4952	6916	5296	7062	5741		5314.67	6033							9	9	10	10	10	10
	O70469	Docking protein 2	DOK2_MOUSE	Dok2	42075	36408	40931	22267	34510	34741		39804.7	30506							15	15	14	15	15	15
	Q9JMF7	Dolichyldiphosphatase 1	DOPP1_MOUSE	Dolpp1	1763	1462	1322	834	901	926		1515.67	887							2	3	4	3	4	3
	Q9QXP4	Protein downstream neighbor of Son	DONS_MOUSE	Donson	1228	1251	1241	1054	1244	1014		1240	1104			targetP signal				7	7	7	7	7	6
	Q8BL99;Q8BL99-5;Q8BL99-6	Protein dopey-1;Isoform 5 of Protein dopey-1;Isoform 6 of Protein dopey-1	DOP1_MOUSE	Dop1a	64	11	33	26	10	12		36	16							3	2	2	2	2	3
	Q3UHQ6;Q3UHQ6-2	Protein dopey-2;Isoform 2 of Protein dopey-2	DOP2_MOUSE	Dop1b	323	288	307	196	236	250		306	227.333			yeast mito homolog				8	8	8	7	7	8
	P42867	UDP-N-acetylglucosamine--dolichyl-phosphate N-acetylglucosaminephosphotransferase	GPT_MOUSE	Dpagt1	486	487	451	395	383	413		474.667	397			Rickettsial homolog				1	2	2	2	2	2
	Q8BPA8	Protein DPCD	DPCD_MOUSE	Dpcd	1663	1324	1361	1415	1484	1264		1449.33	1387.67							2	2	2	2	2	2
	Q61103	Zinc finger protein ubi-d4	REQU_MOUSE	Dpf2	29709	30065	30178	27141	30080	29759		29984	28993.3							18	19	18	19	19	19
	Q5NCQ5	2-(3-amino-3-carboxypropyl)histidine synthase subunit 1	DPH1_MOUSE	Dph1	2342	2087	2028	1765	2031	1965		2152.33	1920.33							6	6	6	6	6	6
	Q9CR25	2-(3-amino-3-carboxypropyl)histidine synthase subunit 2	DPH2_MOUSE	Dph2	3048	2934	3213	2636	3151	2929		3065	2905.33			coexpression				6	6	6	6	6	6
	Q9CWQ0	Diphthine methyl ester synthase	DPH5_MOUSE	Dph5	16454	13583	13470	11053	13022	13151		14502.3	12408.7			Rickettsial homolog, coexpression				12	12	12	12	12	12
	Q9CQ28	Diphthine--ammonia ligase	DPH6_MOUSE	Dph6	2850	2894	2731	2613	2207	1988		2825	2269.33							5	5	5	5	5	5
	Q9CYU6	Diphthine methyltransferase	DPH7_MOUSE	Dph7	2985	2066	2271	1993	2387	2080		2440.67	2153.33			mito protein domain				5	5	5	5	5	5
	O70152	Dolichol-phosphate mannosyltransferase subunit 1	DPM1_MOUSE	Dpm1	42145	44949	41579	37718	35997	37830		42891	37181.7			targetP signal, yeast mito homolog, Rickettsial homolog				14	15	14	15	14	15
	Q9D1Q4	Dolichol-phosphate mannosyltransferase subunit 3	DPM3_MOUSE	Dpm3	4598	5524	5749	4768	5836	5748		5290.33	5450.67							2	2	2	2	2	2
	Q99KK7	Dipeptidyl peptidase 3	DPP3_MOUSE	Dpp3	66303	66604	63127	50764	57951	60361		65344.7	56358.7							39	39	38	39	38	39
	P28843	Dipeptidyl peptidase 4	DPP4_MOUSE	Dpp4	26924	23704	23882	22404	20102	22522		24836.7	21676			MS/MS				28	28	27	27	27	27
	Q9ET22	Dipeptidyl peptidase 2	DPP2_MOUSE	Dpp7	806	995	861	1015	840	829		887.333	894.667			mito protein domain				4	4	4	4	4	4
	Q80YA7	Dipeptidyl peptidase 8	DPP8_MOUSE	Dpp8	2837	2313	2375	1666	2135	2110		2508.33	1970.33							7	7	7	7	7	7
	Q8BVG4	Dipeptidyl peptidase 9	DPP9_MOUSE	Dpp9	14321	14180	12177	9906	12483	12393		13559.3	11594			coexpression				27	27	25	26	27	27
	A6X919	Probable C-mannosyltransferase DPY19L1	D19L1_MOUSE	Dpy19l1	7049	7708	7040	6360	6167	6059		7265.67	6195.33			targetP signal				16	15	15	15	15	15
	Q99LT0	Protein dpy-30 homolog	DPY30_MOUSE	Dpy30	9624	6074	4672	3801	7876	5755		6790	5810.67			induction				4	4	4	5	4	4
	O08553	Dihydropyrimidinase-related protein 2	DPYL2_MOUSE	Dpysl2	345281	334412	351987	260629	313044	310096		343893	294590							30	31	31	31	29	31
	Q91WV0	Protein Dr1	NC2B_MOUSE	Dr1	26023	26200	26276	23750	22343	23216		26166.3	23103							7	6	7	5	6	6
	Q9D6N5	Dr1-associated corepressor	NC2A_MOUSE	Drap1	24561	24775	22944	21450	20668	20096		24093.3	20738							7	7	7	7	7	7
	P32233	Developmentally-regulated GTP-binding protein 1	DRG1_MOUSE	Drg1	63244	66591	66524	54640	60582	61249		65453	58823.7			Rickettsial homolog, mito protein domain				25	26	25	24	24	26
	Q9QXB9	Developmentally-regulated GTP-binding protein 2	DRG2_MOUSE	Drg2	67069	60472	56790	45835	52499	54405		61443.7	50913			Rickettsial homolog, mito protein domain, induction				20	19	19	19	19	19
	Q5HZJ0	Ribonuclease 3	RNC_MOUSE	Drosha	1408	1724	1473	1367	1410	1386		1535	1387.67			Rickettsial homolog, mito protein domain				9	9	9	8	7	9
	Q14AI0	Sister chromatid cohesion protein DCC1	DCC1_MOUSE	DSCC1	7274	7148	6645	7105	6182	6387		7022.33	6558							11	11	11	11	11	11
	Q61495;Q7TSF1	Desmoglein-1-alpha;Desmoglein-1-beta	DSG1A_MOUSE;DSG1B_MOUSE	Dsg1a;Dsg1b	332	232	272	512	347	364		278.667	407.667							2	2	2	2	2	2
	Q9CYC5	Kinetochore-associated protein DSN1 homolog	DSN1_MOUSE	Dsn1	4480	4744	3539	3635	3812	3019		4254.33	3488.67			induction				7	7	7	7	7	6
	E9Q557	Desmoplakin	DESP_MOUSE	Dsp	681	1137	1030	2699	1406	1363		949.333	1822.67			mito protein domain				21	30	24	42	31	32
	Q91ZU6;Q91ZU6-2;Q91ZU6-3;Q91ZU6-4	Dystonin;Isoform 1 of Dystonin;Isoform 3 of Dystonin;Isoform 4 of Dystonin	DYST_MOUSE	Dst	114	91	81	76	123	82		95.3333	93.6667			mito protein domain				2	2	2	2	2	2
	Q9R0P5	Destrin	DEST_MOUSE	Dstn	70963	62931	58315	42658	56563	58757		64069.7	52659.3							10	10	10	10	10	10
	Q9DD18	D-aminoacyl-tRNA deacylase 1	DTD1_MOUSE	Dtd1	8416	6583	7303	6565	8553	7622		7434	7580			MS/MS				4	4	4	4	4	4
	Q8BHA3;Q8BHA3-2	D-aminoacyl-tRNA deacylase 2;Isoform 2 of D-aminoacyl-tRNA deacylase 2	DTD2_MOUSE	Dtd2	7214	5422	5717	4112	6091	5316		6117.67	5173			targetP signal				3	3	3	4	3	4
	Q3TLR7;Q3TLR7-2	Denticleless protein homolog;Isoform 2 of Denticleless protein homolog	DTL_MOUSE	Dtl	279	262	294	223	330	300		278.333	284.333			targetP signal, mito protein domain				4	4	4	4	4	4
	O70585	Dystrobrevin beta	DTNB_MOUSE	Dtnb	141	175	169	136	135	115		161.667	128.667							2	2	2	2	2	2
	Q3UIR3	E3 ubiquitin-protein ligase DTX3L	DTX3L_MOUSE	Dtx3l	8266	8486	8159	5688	8172	6960		8303.67	6940			mito protein domain				23	24	25	23	23	25
	P97930	Thymidylate kinase	KTHY_MOUSE	Dtymk	67911	63489	62692	57184	61865	61769		64697.3	60272.7			Rickettsial homolog, MS/MS+				14	14	14	14	14	14
	Q8C2P3	tRNA-dihydrouridine(16/17) synthase [NAD(P)(+)]-like	DUS1L_MOUSE	Dus1l	452	1018	741	851	701	587		737	713			Rickettsial homolog, mito protein domain, coexpression				3	4	4	3	4	3
	Q9D7B1	tRNA-dihydrouridine(20) synthase [NAD(P)+]-like	DUS2L_MOUSE	Dus2	1823	1813	2299	1467	1517	1061		1978.33	1348.33		MitoCarta3.0	GFP, Rickettsial homolog, mito protein domain	Matrix	Mitochondrial central dogma > mtRNA metabolism > mt-tRNA modifications		5	8	9	7	9	7
	Q91XI1	tRNA-dihydrouridine(47) synthase [NAD(P)(+)]-like	DUS3L_MOUSE	Dus3l	9185	9058	8616	9008	9011	8487		8953	8835.33			Rickettsial homolog, mito protein domain				15	15	15	15	15	15
	Q6NXK5	RNA/RNP complex-1-interacting phosphatase	DUS11_MOUSE	Dusp11	1401	1290	1327	1084	1253	1306		1339.33	1214.33			mito protein domain				3	3	3	3	3	3
	Q9D0T2	Dual specificity protein phosphatase 12	DUS12_MOUSE	Dusp12	2449	2382	2226	1766	2118	2023		2352.33	1969			mito protein domain				3	3	3	3	3	3
	Q9D7X3	Dual specificity protein phosphatase 3	DUS3_MOUSE	Dusp3	2235	1509	900	698	1718	1371		1548	1262.33			mito protein domain, MS/MS				4	4	2	3	4	4
	Q1HL35	Dual specificity protein phosphatase	Q1HL35_MOUSE	Dusp5	309	250	298	308	365	337		285.667	336.667			mito protein domain				2	2	2	2	2	2
	Q9DBB1	Dual specificity protein phosphatase 6	DUS6_MOUSE	Dusp6	1112	706	808	446	956	837		875.333	746.333			mito protein domain, induction				2	2	2	2	2	2
	Q9CQ43	Deoxyuridine 5'-triphosphate nucleotidohydrolase	Q9CQ43_MOUSE	Dut	510450	474250	550953	368013	510420	484375		511884	454269							12	12	11	12	11	12
	Q60838	Segment polarity protein dishevelled homolog DVL-2	DVL2_MOUSE	Dvl2	7434	7267	7267	6467	7381	7195		7322.67	7014.33			mito protein domain				9	9	8	9	9	9
	O70348	Decapping and exoribonuclease protein	DXO_MOUSE	Dxo	461	384	388	358	493	394		411	415			induction				2	2	2	2	2	2
	Q8CHY3	Dymeclin	DYM_MOUSE	Dym	1263	1319	1319	1238	824	1170		1300.33	1077.33							4	4	4	4	3	4
	Q9JHU4	Cytoplasmic dynein 1 heavy chain 1	DYHC1_MOUSE	Dync1h1	42696	43516	41194	41773	39476	39454		42468.7	40234.3			mito protein domain				230	232	225	222	226	227
	O88487	Cytoplasmic dynein 1 intermediate chain 2	DC1I2_MOUSE	Dync1i2	20801	21745	20820	15061	22171	20385		21122	19205.7			mito protein domain				20	19	19	19	19	19
	Q8R1Q8	Cytoplasmic dynein 1 light intermediate chain 1	DC1L1_MOUSE	Dync1li1	56199	53867	56244	41200	57765	54338		55436.7	51101			targetP signal				25	25	25	22	25	25
	Q6PDL0	Cytoplasmic dynein 1 light intermediate chain 2	DC1L2_MOUSE	Dync1li2	5927	5405	5765	3604	5528	4926		5699	4686							12	11	12	11	12	11
	P63168	Dynein light chain 1, cytoplasmic	DYL1_MOUSE	Dynll1	110578	109807	86540	91090	92883	92303		102308	92092			mito protein domain				6	5	6	6	5	5
	Q9D0M5	Dynein light chain 2, cytoplasmic	DYL2_MOUSE	Dynll2	41960	45901	42887	46937	42504	40003		43582.7	43148			mito protein domain, induction				4	2	3	4	2	2
	P62627	Dynein light chain roadblock-type 1	DLRB1_MOUSE	Dynlrb1	50246	49176	51205	37328	45693	46341		50209	43120.7			coexpression, MS/MS				4	4	4	4	4	4
	P51807	Dynein light chain Tctex-type 1	DYLT1_MOUSE	Dynlt1	28963	25924	25713	17346	23602	24162		26866.7	21703.3							5	5	5	5	5	5
	Q61214	Dual specificity tyrosine-phosphorylation-regulated kinase 1A	DYR1A_MOUSE	Dyrk1a	1311	1573	1526	1407	1284	1388		1470	1359.67			mito protein domain				8	8	7	8	8	8
	O35261	Transcription factor E2F3	E2F3_MOUSE	E2f3	1000	826	821	688	869	794		882.333	783.667							3	3	3	3	3	3
	Q8R0K9	Transcription factor E2F4	E2F4_MOUSE	E2f4	9576	10155	10524	7773	10095	9296		10085	9054.67			coexpression				12	11	12	11	11	11
	Q58FA4	Transcription factor E2F8	E2F8_MOUSE	E2f8	72	83	86	59	77	65		80.3333	67							2	2	2	2	2	1
	Q9D4C5	ELL-associated factor 1	EAF1_MOUSE	Eaf1	1311	1251	1230	676	2024	1043		1264	1247.67							3	3	3	3	4	3
	Q9CXJ1	Probable glutamate--tRNA ligase, mitochondrial	SYEM_MOUSE	Ears2	447	208	336	415	345	425		330.333	395		MitoCarta3.0	literature, APEX_matrix, GFP, yeast mito homolog++, Rickettsial homolog, mito protein domain, coexpression	Matrix	Mitochondrial central dogma > Translation > mt-tRNA synthetases		4	3	5	5	3	4
	Q9D0V7	Receptor-binding cancer antigen expressed on SiSo cells	RCAS1_MOUSE	Ebag9	1199	1361	1688	1062	1476	1332		1416	1290							2	2	2	2	2	2
	Q9D903	Probable rRNA-processing protein EBP2	EBP2_MOUSE	Ebna1bp2	31587	35580	33026	31275	34128	33124		33397.7	32842.3							19	19	19	19	19	19
	P70245	3-beta-hydroxysteroid-Delta(8),Delta(7)-isomerase	EBP_MOUSE	Ebp	47208	53796	49872	39703	42952	45639		50292	42764.7							3	3	3	3	3	3
	Q9CS74	Protein ecdysoneless homolog	ECD_MOUSE	Ecd	3076	2507	2703	1864	2390	2364		2762	2206			coexpression				11	11	11	11	11	11
	O35459	Delta(3,5)-Delta(2,4)-dienoyl-CoA isomerase, mitochondrial	ECH1_MOUSE	Ech1	12997	13178	12490	9159	10683	10608		12888.3	10150		MitoCarta3.0	APEX_matrix, targetP signal, yeast mito homolog+, mito protein domain, coexpression+, MS/MS++	Matrix	Metabolism > Lipid metabolism		15	15	15	15	15	13
	Q9D9V3;Q9D9V3-2	Ethylmalonyl-CoA decarboxylase;Isoform 2 of Ethylmalonyl-CoA decarboxylase	ECHD1_MOUSE	Echdc1	6963	6231	5483	5706	7131	6878		6225.67	6571.67		MitoCarta3.0	yeast mito homolog+, Rickettsial homolog, mito protein domain, coexpression, MS/MS+	unknown	Metabolism > Lipid metabolism		5	5	5	5	5	5
	Q8BH95	Enoyl-CoA hydratase, mitochondrial	ECHM_MOUSE	Echs1	33295	35541	33644	32099	28270	30481		34160	30283.3		MitoCarta3.0	literature, APEX_matrix, targetP signal+, yeast mito homolog+, Rickettsial homolog, mito protein domain, induction, coexpression+, MS/MS++	Matrix	Metabolism > Lipid metabolism > Fatty acid oxidation | Metabolism > Amino acid metabolism > Branched-chain amino acid metabolism | Metabolism > Amino acid metabolism > Lysine metabolism		12	13	12	13	12	12
	P42125	Enoyl-CoA delta isomerase 1, mitochondrial	ECI1_MOUSE	Eci1	54767	60286	56808	50840	45090	49037		57287	48322.3		MitoCarta3.0	literature, APEX_matrix, targetP signal+, mito protein domain, coexpression+, MS/MS++	Matrix	Metabolism > Lipid metabolism > Fatty acid oxidation		11	11	11	11	11	11
	Q9WUR2;Q9WUR2-2	Enoyl-CoA delta isomerase 2;Isoform 2 of Enoyl-CoA delta isomerase 2	ECI2_MOUSE	Eci2	4816	6725	6248	5596	6017	4031		5929.67	5214.67		MitoCarta3.0	literature, APEX_matrix, targetP signal, mito protein domain, coexpression+, MS/MS++	Matrix	Metabolism > Lipid metabolism > Fatty acid oxidation		6	8	8	8	8	7
	Q6PDI5	Proteasome adapter and scaffold protein ECM29	ECM29_MOUSE	Ecpas	22171	21941	21064	18509	19692	19197		21725.3	19132.7							80	82	79	79	77	79
	Q9QZH6	Evolutionarily conserved signaling intermediate in Toll pathway, mitochondrial	ECSIT_MOUSE	Ecsit	4252	4228	3868	3483	4117	3863		4116	3821		MitoCarta3.0	literature, APEX_matrix, targetP signal, mito protein domain, induction, coexpression+	MIM	OXPHOS > Complex I > CI assembly factors | OXPHOS > OXPHOS assembly factors		8	9	9	7	10	9
	Q07139;Q07139-2	Protein ECT2;Isoform 2 of Protein ECT2	ECT2_MOUSE	Ect2	1065	872	876	636	938	845		937.667	806.333			mito protein domain				11	11	10	11	10	11
	Q8VHX2	Ectodysplasin-A receptor-associated adapter protein	EDAD_MOUSE	Edaradd	4160	4043	4183	3597	4126	3253		4128.67	3658.67							2	2	2	2	2	1
	Q8K2D3	Enhancer of mRNA-decapping protein 3	EDC3_MOUSE	Edc3	12782	11695	11891	10021	11995	10914		12122.7	10976.7			mito protein domain				18	18	18	18	17	18
	Q3UJB9	Enhancer of mRNA-decapping protein 4	EDC4_MOUSE	Edc4	20162	17863	17068	13897	16512	16049		18364.3	15486							44	43	43	41	40	42
	Q925U4	ER degradation-enhancing alpha-mannosidase-like protein 1	EDEM1_MOUSE	Edem1	295	299	318	184	221	232		304	212.333							2	2	2	2	2	2
	Q8BJT9	ER degradation-enhancing alpha-mannosidase-like protein 2	EDEM2_MOUSE	Edem2	167	83	103	46	139	126		117.667	103.667							2	2	2	1	2	2
	Q2HXL6	ER degradation-enhancing alpha-mannosidase-like protein 3	EDEM3_MOUSE	Edem3	210	198	191	116	207	93		199.667	138.667							3	3	3	2	3	2
	Q9JMG1	Endothelial differentiation-related factor 1	EDF1_MOUSE	Edf1	91716	93156	100153	76629	98472	93264		95008.3	89455			yeast mito homolog, Rickettsial homolog, coexpression				10	10	9	10	9	10
	Q6GQV7	Erythroid differentiation-related factor 1	EDRF1_MOUSE	Edrf1	113	92	91	62	85	82		98.6667	76.3333							4	4	4	4	4	4
	Q8BL66	Early endosome antigen 1	EEA1_MOUSE	Eea1	4997	4930	4989	4471	5218	5911		4972	5200							35	34	35	34	35	34
	Q921E6-2	Isoform 2 of Polycomb protein EED	EED_MOUSE	Eed	28592	29207	27347	23779	24518	25626		28382	24641			mito protein domain				23	21	22	22	21	22
	P10126	Elongation factor 1-alpha 1	EF1A1_MOUSE	Eef1a1	6244563	5462200	5655998	4043765	5799018	5277327		5787587	5.04004e+06			yeast mito homolog, Rickettsial homolog, mito protein domain				40	40	41	42	39	41
	Q9CY45	EEF1A lysine methyltransferase 1	EFMT1_MOUSE	Eef1akmt1	6338	5170	5223	3877	5661	4977		5577	4838.33			coexpression				4	4	4	4	4	4
	Q9D853	EEF1A lysine methyltransferase 2	EFMT2_MOUSE	Eef1akmt2	5315	4351	4375	3862	4383	4456		4680.33	4233.67			mito protein domain+				5	5	5	5	5	5
	P0DPD9;P0DPD9-2;P0DPE0	EEF1AKMT4-ECE2 readthrough transcript protein;Isoform Eef1akmt4-Ece2-2 of EEF1AKMT4-ECE2 readthrough transcript protein;EEF1A lysine methyltransferase 4	EFCE2_MOUSE;EFCE2_MOUSE;EFMT4_MOUSE	Eef1akmt4-Ece2;Eef1akmt4-Ece2;Eef1akmt4	600	691	888	432	727	574		726.333	577.667							4	4	3	4	4	4
	Q91YR5	eEF1A lysine and N-terminal methyltransferase	EFNMT_MOUSE	EEF1AKNMT	3822	3803	3538	3520	3094	3327		3721	3313.67			mito protein domain+, coexpression				14	15	15	15	13	15
	O70251	Elongation factor 1-beta	EF1B_MOUSE	Eef1b	338948	341892	339066	229243	344469	281870		339969	285194							17	17	18	17	17	16
	P57776	Elongation factor 1-delta	EF1D_MOUSE	Eef1d	415472	408974	419856	326237	398719	388832		414767	371263							19	18	18	19	18	18
	Q9D1M4	Eukaryotic translation elongation factor 1 epsilon-1	MCA3_MOUSE	Eef1e1	46591	42590	40868	36047	41496	40571		43349.7	39371.3			mito protein domain				11	11	11	11	11	11
	Q9D8N0	Elongation factor 1-gamma	EF1G_MOUSE	Eef1g	578626	562668	560810	414170	512423	505089		567368	477227			mito protein domain				31	33	32	31	31	32
	P58252	Elongation factor 2	EF2_MOUSE	Eef2	1651137	1545961	1577601	1167237	1513844	1435481		1.59157e+06	1.37219e+06			Rickettsial homolog, mito protein domain				69	67	69	68	67	67
	Q3UZW7;Q3UZW7-3	Protein-lysine N-methyltransferase EEF2KMT;Isoform 3 of Protein-lysine N-methyltransferase EEF2KMT	EF2KT_MOUSE	Eef2kmt	197	165	158	121	126	127		173.333	124.667			induction				2	1	2	2	2	1
	Q9JHW4	Selenocysteine-specific elongation factor	SELB_MOUSE	Eefsec	24921	20335	20665	19194	22124	21648		21973.7	20988.7			targetP signal, yeast mito homolog+, Rickettsial homolog, mito protein domain				26	26	26	27	26	27
	Q9D8Y0	EF-hand domain-containing protein D2	EFHD2_MOUSE	Efhd2	230738	223566	231516	159812	222549	213607		228607	198656							19	20	19	20	19	19
	Q8C0D5	Elongation factor-like GTPase 1	EFL1_MOUSE	Efl1	8205	7899	10111	6068	7556	6909		8738.33	6844.33			Rickettsial homolog, mito protein domain				27	29	28	28	26	28
	Q8BG67;Q8BG67-2	Protein EFR3 homolog A;Isoform 2 of Protein EFR3 homolog A	EFR3A_MOUSE	Efr3a	10375	10250	9603	7517	8752	9116		10076	8461.67			yeast mito homolog, induction				28	28	28	28	27	28
	O08810	116 kDa U5 small nuclear ribonucleoprotein component	U5S1_MOUSE	Eftud2	135401	149175	149341	126849	134853	135204		144639	132302			Rickettsial homolog, mito protein domain, coexpression				59	59	57	59	59	58
	Q91YE3	Egl nine homolog 1	EGLN1_MOUSE	Egln1	5794	5986	5534	3662	5267	4657		5771.33	4528.67			induction, coexpression				9	10	9	8	10	9
	P08046	Early growth response protein 1	EGR1_MOUSE	Egr1	33	47	39	85	65	46		39.6667	65.3333							2	2	2	3	2	2
	Q99MS7	EH domain-binding protein 1-like protein 1	EH1L1_MOUSE	Ehbp1l1	1326	988	1307	538	1063	1031		1207	877.333							17	16	17	16	14	15
	Q9WVK4	EH domain-containing protein 1	EHD1_MOUSE	Ehd1	48872	52718	48018	41329	30626	42444		49869.3	38133			mito protein domain				24	24	25	25	24	25
	Q9QXY6	EH domain-containing protein 3	EHD3_MOUSE	Ehd3	48068	45762	42639	34538	35980	37185		45489.7	35901			mito protein domain				29	29	28	26	28	28
	Q9EQP2	EH domain-containing protein 4	EHD4_MOUSE	Ehd4	87022	92908	87466	68787	73840	81107		89132	74578			targetP signal, mito protein domain				24	24	24	24	24	24
	Q9DBM2	Peroxisomal bifunctional enzyme	ECHP_MOUSE	Ehhadh	1372	1328	1330	1003	1244	1047		1343.33	1098		MitoCarta3.0	yeast mito homolog+, Rickettsial homolog, mito protein domain, coexpression, MS/MS+	unknown	Metabolism > Lipid metabolism		4	4	4	4	4	4
	Q5DW34;Q5DW34-2	Histone-lysine N-methyltransferase EHMT1;Isoform 2 of Histone-lysine N-methyltransferase EHMT1	EHMT1_MOUSE	Ehmt1	1601	1793	1773	1561	1788	1656		1722.33	1668.33			Rickettsial homolog, mito protein domain				14	17	17	17	16	16
	Q9Z148-2	Isoform 2 of Histone-lysine N-methyltransferase EHMT2	EHMT2_MOUSE	Ehmt2	1685	1578	1568	1292	1496	1519		1610.33	1435.67			Rickettsial homolog, mito protein domain				13	13	13	13	13	14
	Q61070	Etoposide-induced protein 2.4	EI24_MOUSE	Ei24	4609	4274	3891	3436	3643	3537		4258	3538.67			coexpression				4	4	4	4	4	4
	P48024	Eukaryotic translation initiation factor 1	EIF1_MOUSE	Eif1	269714	223391	243610	143836	254435	196394		245572	198222							14	14	14	14	13	14
	Q60872	Eukaryotic translation initiation factor 1A	IF1A_MOUSE	Eif1a	100310	94257	95755	74302	101468	95851		96774	90540.3							8	8	8	8	8	8
	Q3THJ3	Probable RNA-binding protein EIF1AD	EIF1A_MOUSE	Eif1ad	14614	13128	14633	9767	15262	14301		14125	13110			induction				5	5	5	5	5	5
	Q8BMJ3	Eukaryotic translation initiation factor 1A, X-chromosomal	IF1AX_MOUSE	Eif1ax	51589	40376	41766	28681	35555	36253		44577	33496.3			Rickettsial homolog, coexpression				4	4	4	4	4	4
	Q9CXU9	Eukaryotic translation initiation factor 1b	EIF1B_MOUSE	Eif1b	9947	7002	8100	5931	7397	5469		8349.67	6265.67			MS/MS				3	3	3	3	3	3
	Q8BJW6	Eukaryotic translation initiation factor 2A	EIF2A_MOUSE	Eif2a	116983	110046	101591	85012	113101	112372		109540	103495							29	30	30	30	30	30
	Q03963	Interferon-induced, double-stranded RNA-activated protein kinase	E2AK2_MOUSE	Eif2ak2	4394	3922	3802	2613	4020	3374		4039.33	3335.67			mito protein domain				11	10	10	8	10	9
	Q9Z2B5	Eukaryotic translation initiation factor 2-alpha kinase 3	E2AK3_MOUSE	Eif2ak3	963	635	1000	410	624	561		866	531.667			mito protein domain				9	8	9	8	9	8
	Q9QZ05;Q9QZ05-2;Q9QZ05-3;Q9QZ05-4	eIF-2-alpha kinase GCN2;Isoform 2 of eIF-2-alpha kinase GCN2;Isoform 3 of eIF-2-alpha kinase GCN2;Isoform 4 of eIF-2-alpha kinase GCN2	E2AK4_MOUSE	Eif2ak4	3100	2839	3145	917	2509	2937		3028	2121			mito protein domain				4	4	4	4	4	4
	Q99LC8	Translation initiation factor eIF-2B subunit alpha	EI2BA_MOUSE	Eif2b1	31373	29230	29360	23771	28106	28159		29987.7	26678.7							16	16	16	16	16	16
	Q99LD9	Translation initiation factor eIF-2B subunit beta	EI2BB_MOUSE	Eif2b2	26197	26263	22967	22411	21654	20948		25142.3	21671			yeast mito homolog				15	15	15	15	15	14
	B1AUN2	Eukaryotic translation initiation factor 2B, subunit 3	B1AUN2_MOUSE	Eif2b3	30133	31189	29594	24496	26853	26961		30305.3	26103.3			Rickettsial homolog				28	28	28	27	28	28
	Q61749;Q61749-2	Translation initiation factor eIF-2B subunit delta;Isoform 2 of Translation initiation factor eIF-2B subunit delta	EI2BD_MOUSE	Eif2b4	21140	21460	20343	17869	20485	19949		20981	19434.3			induction, coexpression				19	19	17	18	18	18
	Q8CHW4	Translation initiation factor eIF-2B subunit epsilon	EI2BE_MOUSE	Eif2b5	16269	15431	15294	12433	14116	13980		15664.7	13509.7			mito protein domain, coexpression				23	23	22	21	23	23
	Q61211	Eukaryotic translation initiation factor 2D	EIF2D_MOUSE	Eif2d	19555	18021	18122	13971	13404	15977		18566	14450.7			targetP signal				22	23	22	23	21	23
	Q6ZWX6	Eukaryotic translation initiation factor 2 subunit 1	IF2A_MOUSE	Eif2s1	342578	320775	334021	250592	341923	319200		332458	303905			mito protein domain				30	31	32	32	29	31
	Q99L45	Eukaryotic translation initiation factor 2 subunit 2	IF2B_MOUSE	Eif2s2	171128	162170	162168	133045	168163	148868		165155	150025							33	32	32	31	31	32
	Q9Z0N1	Eukaryotic translation initiation factor 2 subunit 3, X-linked	IF2G_MOUSE	Eif2s3x	38432	39711	42785	33544	42068	40637		40309.3	38749.7			Rickettsial homolog, mito protein domain				7	6	6	7	6	7
	Q9Z0N2	Eukaryotic translation initiation factor 2 subunit 3, Y-linked	IF2H_MOUSE	Eif2s3y	153618	151288	156503	124114	140673	143276		153803	136021			Rickettsial homolog, mito protein domain, coexpression				25	26	24	25	25	25
	P23116	Eukaryotic translation initiation factor 3 subunit A	EIF3A_MOUSE	Eif3a	130239	137770	135757	150233	127987	138427		134589	138882							86	87	86	87	83	86
	Q8JZQ9	Eukaryotic translation initiation factor 3 subunit B	EIF3B_MOUSE	Eif3b	154573	139385	148696	105275	142310	134786		147551	127457			mito protein domain, coexpression				51	51	52	50	51	51
	Q8R1B4	Eukaryotic translation initiation factor 3 subunit C	EIF3C_MOUSE	Eif3c	107526	102769	100725	81395	96974	95245		103673	91204.7			coexpression				41	42	41	42	40	41
	O70194	Eukaryotic translation initiation factor 3 subunit D	EIF3D_MOUSE	Eif3d	107577	105402	107730	83841	99772	102766		106903	95459.7			coexpression				29	29	29	28	28	28
	P60229	Eukaryotic translation initiation factor 3 subunit E	EIF3E_MOUSE	Eif3e	195448	170299	164419	130907	160534	160324		176722	150588							28	28	28	27	27	28
	Q9DCH4	Eukaryotic translation initiation factor 3 subunit F	EIF3F_MOUSE	Eif3f	154651	152190	148774	116405	141989	141169		151872	133188							15	16	16	16	16	16
	Q9Z1D1	Eukaryotic translation initiation factor 3 subunit G	EIF3G_MOUSE	Eif3g	122226	121064	124801	93938	123909	119156		122697	112334			mito protein domain				26	25	25	25	25	25
	Q91WK2	Eukaryotic translation initiation factor 3 subunit H	EIF3H_MOUSE	Eif3h	136727	124017	124976	92938	134199	123763		128573	116967			yeast mito homolog, coexpression				23	23	23	22	22	23
	Q9QZD9	Eukaryotic translation initiation factor 3 subunit I	EIF3I_MOUSE	Eif3i	174218	164869	171537	130406	170340	164344		170208	155030			mito protein domain, coexpression				21	21	21	22	20	21
	Q3UGC7	Eukaryotic translation initiation factor 3 subunit J-A	EI3JA_MOUSE	Eif3j1	126052	121472	125845	95821	127469	120944		124456	114745							19	19	19	18	18	19
	Q9DBZ5	Eukaryotic translation initiation factor 3 subunit K	EIF3K_MOUSE	Eif3k	89971	79332	76413	64867	83027	83097		81905.3	76997							12	11	11	12	12	12
	Q8QZY1	Eukaryotic translation initiation factor 3 subunit L	EIF3L_MOUSE	Eif3l	144206	136598	138911	105694	129147	126972		139905	120604			induction				32	34	32	33	29	31
	Q99JX4	Eukaryotic translation initiation factor 3 subunit M	EIF3M_MOUSE	Eif3m	145121	126886	127997	97969	117109	117393		133335	110824							20	20	21	21	21	20
	P60843	Eukaryotic initiation factor 4A-I	IF4A1_MOUSE	Eif4a1	1700030	1584712	1571916	1253652	1520277	1476253		1618886	1.41673e+06			Rickettsial homolog, mito protein domain				32	32	32	32	31	32
	P10630;P10630-2	Eukaryotic initiation factor 4A-II;Isoform 2 of Eukaryotic initiation factor 4A-II	IF4A2_MOUSE	Eif4a2	13862	11973	14885	10421	14539	12412		13573.3	12457.3			Rickettsial homolog, mito protein domain				10	11	11	11	10	11
	Q91VC3	Eukaryotic initiation factor 4A-III	IF4A3_MOUSE	Eif4a3	293039	290446	277208	245810	268851	265604		286898	260088			Rickettsial homolog, mito protein domain				27	27	26	26	26	27
	Q8BGD9	Eukaryotic translation initiation factor 4B	IF4B_MOUSE	Eif4b	55470	56527	60246	47124	63976	57396		57414.3	56165.3			mito protein domain				35	34	32	35	34	37
	P63073	Eukaryotic translation initiation factor 4E	IF4E_MOUSE	Eif4e	107698	85876	92484	79592	101370	97283		95352.7	92748.3			coexpression				12	12	11	12	12	12
	Q8BMB3	Eukaryotic translation initiation factor 4E type 2	IF4E2_MOUSE	Eif4e2	8076	6942	6994	5679	6254	6248		7337.33	6060.33							8	8	8	8	8	8
	Q9DBB5	Eukaryotic translation initiation factor 4E type 3	IF4E3_MOUSE	Eif4e3	6195	5720	6271	4063	6421	5000		6062	5161.33			induction, coexpression				5	6	7	6	6	5
	P70445	Eukaryotic translation initiation factor 4E-binding protein 2	4EBP2_MOUSE	Eif4ebp2	2912	2249	2882	2062	3459	2870		2681	2797			targetP signal, coexpression				3	2	3	3	3	3
	Q9EST3	Eukaryotic translation initiation factor 4E transporter	4ET_MOUSE	Eif4enif1	2372	2612	2416	2137	2863	2526		2466.67	2508.67							15	16	15	16	16	16
	Q6NZJ6	Eukaryotic translation initiation factor 4 gamma 1	IF4G1_MOUSE	Eif4g1	49437	49268	49684	32697	50568	45772		49463	43012.3			yeast mito homolog, coexpression				65	65	65	61	64	64
	Q62448	Eukaryotic translation initiation factor 4 gamma 2	IF4G2_MOUSE	Eif4g2	47345	43853	43492	35515	41330	40394		44896.7	39079.7							47	46	45	47	44	46
	Q80XI3-2;Q80XI3-4	Isoform 2 of Eukaryotic translation initiation factor 4 gamma 3;Isoform 4 of Eukaryotic translation initiation factor 4 gamma 3	IF4G3_MOUSE	Eif4g3	11301	10773	11030	8038	9684	9250		11034.7	8990.67			targetP signal				40	41	41	39	39	41
	Q9WUK2	Eukaryotic translation initiation factor 4H	IF4H_MOUSE	Eif4h	135731	151163	151497	123071	155281	136627		146130	138326			yeast mito homolog, mito protein domain				16	16	15	15	13	15
	P59325	Eukaryotic translation initiation factor 5	IF5_MOUSE	Eif5	395469	296412	274011	88729	116546	124615		321964	109963							25	25	24	24	25	25
	P63242	Eukaryotic translation initiation factor 5A-1	IF5A1_MOUSE	Eif5a	2496347	2170628	2217115	1800237	2360211	2136545		2.2947e+06	2.099e+06			yeast mito homolog, Rickettsial homolog				19	19	19	19	19	19
	Q05D44	Eukaryotic translation initiation factor 5B	IF2P_MOUSE	Eif5b	29693	26464	26862	21530	27884	25749		27673	25054.3			yeast mito homolog, Rickettsial homolog, mito protein domain				54	53	53	53	54	54
	O55135	Eukaryotic translation initiation factor 6	IF6_MOUSE	Eif6	278992	205435	212669	155699	215797	192909		232365	188135			coexpression				11	11	11	11	11	11
	Q8K0G5	EARP and GARP complex-interacting protein 1	EIPR1_MOUSE	Eipr1	6153	5855	5681	4809	5431	5478		5896.33	5239.33			mito protein domain				9	9	9	9	9	9
	Q80Y81;Q80Y81-2	Zinc phosphodiesterase ELAC protein 2;Isoform 2 of Zinc phosphodiesterase ELAC protein 2	RNZ2_MOUSE	Elac2	16012	15317	15320	13800	15335	14563		15549.7	14566		MitoCarta3.0	APEX_matrix, GFP, targetP signal, yeast mito homolog, Rickettsial homolog, mito protein domain, MS/MS	Matrix	Mitochondrial central dogma > mtRNA metabolism > Polycistronic mtRNA processing		33	34	34	34	32	33
	P70372	ELAV-like protein 1	ELAV1_MOUSE	Elavl1	272316	297786	291519	267356	265157	269783		287207	267432			mito protein domain				20	20	20	20	20	20
	Q60775	ETS-related transcription factor Elf-1	ELF1_MOUSE	Elf1	11366	12280	12173	11827	11704	11716		11939.7	11749							11	11	11	11	11	11
	Q9JHC9-3;Q9JHC9-4	Isoform 2 of ETS-related transcription factor Elf-2;Isoform 3 of ETS-related transcription factor Elf-2	ELF2_MOUSE	Elf2	4769	5602	5268	5164	4686	5225		5213	5025							10	10	9	10	9	10
	Q9Z2U4	ETS-related transcription factor Elf-4	ELF4_MOUSE	Elf4	1232	1263	1323	1099	1160	1125		1272.67	1128							3	3	3	3	3	3
	O08856	RNA polymerase II elongation factor ELL	ELL_MOUSE	Ell	4946	5030	4772	3360	4888	4717		4916	4321.67							16	17	15	15	16	16
	Q8BPU7	Engulfment and cell motility protein 1	ELMO1_MOUSE	Elmo1	56695	63911	58920	54734	52428	55284		59842	54148.7			yeast mito homolog				38	38	38	37	37	38
	Q8BHL5;Q8BHL5-2	Engulfment and cell motility protein 2;Isoform 2 of Engulfment and cell motility protein 2	ELMO2_MOUSE	Elmo2	8572	9972	10022	5777	8437	8344		9522	7519.33							16	16	16	16	16	16
	Q8CB77	Elongin-A	ELOA1_MOUSE	Eloa	5868	5469	5459	4362	5810	5136		5598.67	5102.67							19	19	19	18	18	19
	P62869	Elongin-B	ELOB_MOUSE	Elob	225325	202865	225298	147272	226092	203945		217829	192436							13	13	13	13	13	13
	P83940	Elongin-C	ELOC_MOUSE	Eloc	124245	110944	115310	89635	120072	112606		116833	107438			coexpression				7	8	8	7	6	6
	Q9JLJ5	Elongation of very long chain fatty acids protein 1	ELOV1_MOUSE	Elovl1	6998	4574	5778	4868	5352	9747		5783.33	6655.67							4	4	4	4	4	4
	Q8BHI7	Elongation of very long chain fatty acids protein 5	ELOV5_MOUSE	Elovl5	11913	10187	9577	6693	9328	9136		10559	8385.67			coexpression				4	4	4	3	4	4
	Q7TT37	Elongator complex protein 1	ELP1_MOUSE	Elp1	12316	11606	11029	9526	10527	10762		11650.3	10271.7							40	42	39	40	40	42
	Q91WG4	Elongator complex protein 2	ELP2_MOUSE	Elp2	18403	17101	16449	12489	15227	15569		17317.7	14428.3			mito protein domain				26	26	25	25	26	25
	Q9CZX0	Elongator complex protein 3	ELP3_MOUSE	Elp3	25727	23854	22707	18569	19487	20353		24096	19469.7			Rickettsial homolog, mito protein domain				23	23	23	24	23	24
	Q9ER73	Elongator complex protein 4	ELP4_MOUSE	Elp4	6509	7054	8051	6716	6188	6140		7204.67	6348							14	14	14	14	14	14
	Q99L85	Elongator complex protein 5	ELP5_MOUSE	Elp5	3529	2558	3476	2380	3102	2945		3187.67	2809							4	3	4	3	4	4
	Q8BK75;Q8BK75-2	Elongator complex protein 6;Isoform 2 of Elongator complex protein 6	ELP6_MOUSE	Elp6	5510	5227	5357	4069	4267	4364		5364.67	4233.33							6	6	6	6	6	6
	P21995	Embigin	EMB_MOUSE	Emb	53603	48537	55092	31084	46752	46903		52410.7	41579.7							9	9	9	9	9	9
	Q8C7X2-2	Isoform 2 of ER membrane protein complex subunit 1	EMC1_MOUSE	Emc1	17260	17109	15220	13535	14711	14255		16529.7	14167							34	33	33	31	31	34
	Q3TAS6;Q3TAS6-2	ER membrane protein complex subunit 10;Isoform 2 of ER membrane protein complex subunit 10	EMC10_MOUSE	Emc10	7466	7086	6613	5795	6047	6627		7055	6156.33			targetP signal				4	4	4	4	4	4
	Q9CRD2	ER membrane protein complex subunit 2	EMC2_MOUSE	Emc2	13960	18252	15301	15318	15613	16109		15837.7	15680			GFP, mito protein domain, induction				12	12	11	12	11	12
	Q99KI3	ER membrane protein complex subunit 3	EMC3_MOUSE	Emc3	19410	20394	17324	16406	16619	16412		19042.7	16479			coexpression				10	10	9	10	10	10
	Q9CZX9	ER membrane protein complex subunit 4	EMC4_MOUSE	Emc4	15470	13828	13743	11912	13689	13094		14347	12898.3							5	5	5	5	5	5
	Q9CQW0	ER membrane protein complex subunit 6	EMC6_MOUSE	Emc6	12092	15775	15405	12760	14141	13915		14424	13605.3			coexpression++				2	2	2	2	2	2
	Q9EP72	ER membrane protein complex subunit 7	EMC7_MOUSE	Emc7	45676	52280	51281	51947	51515	49096		49745.7	50852.7							7	7	7	7	7	7
	O70378	ER membrane protein complex subunit 8	EMC8_MOUSE	Emc8	26507	25409	24083	20050	22385	22677		25333	21704							10	10	10	10	10	10
	O08579	Emerin	EMD_MOUSE	Emd	48204	53129	55776	46636	51199	48468		52369.7	48767.7							15	15	15	14	15	15
	Q8BJW7	Crossover junction endonuclease EME1	EME1_MOUSE	Eme1	439	312	322	381	375	286		357.667	347.333							2	2	2	2	2	2
	O35130	Ribosomal RNA small subunit methyltransferase NEP1	NEP1_MOUSE	Emg1	67570	65796	58888	58537	57829	60029		64084.7	58798.3			induction				17	17	17	17	17	17
	Q7TNG5	Echinoderm microtubule-associated protein-like 2	EMAL2_MOUSE	Eml2	13712	13961	13207	12233	12329	12634		13626.7	12398.7			mito protein domain				17	17	17	17	17	17
	Q8VC03	Echinoderm microtubule-associated protein-like 3	EMAL3_MOUSE	Eml3	8273	8498	8168	6627	6795	7828		8313	7083.33			mito protein domain				20	20	20	20	20	20
	Q3UMY5	Echinoderm microtubule-associated protein-like 4	EMAL4_MOUSE	Eml4	15585	15362	15549	13960	14337	14608		15498.7	14301.7			mito protein domain				36	35	34	36	34	35
	Q8BMB0;Q8BMB0-2;Q8BMB0-3	BRCA2-interacting transcriptional repressor EMSY;Isoform 2 of BRCA2-interacting transcriptional repressor EMSY;Isoform 3 of BRCA2-interacting transcriptional repressor EMSY	EMSY_MOUSE	Emsy	415	383	398	366	380	390		398.667	378.667							5	5	6	6	6	5
	Q8C522	Endonuclease domain-containing 1 protein	ENDD1_MOUSE	Endod1	8901	8048	8131	4266	7098	6244		8360	5869.33							12	12	12	12	12	12
	O08600	Endonuclease G, mitochondrial	NUCG_MOUSE	Endog	7416	8379	7417	5688	5820	6033		7737.33	5847		MitoCarta3.0	literature, APEX_IMS, yeast mito homolog, mito protein domain, coexpression++, MS/MS	IMS	Mitochondrial central dogma > mtDNA maintenance > mtDNA stability and decay | Mitochondrial central dogma > mtRNA metabolism > mtRNA stability and decay | Mitochondrial dynamics and surveillance > Apoptosis		7	7	7	6	6	6
	Q8BX80	Cytosolic endo-beta-N-acetylglucosaminidase	ENASE_MOUSE	Engase	838	690	669	483	705	661		732.333	616.333							5	5	5	4	5	4
	P17182	Alpha-enolase	ENOA_MOUSE	Eno1	6500639	5410373	6225365	4385677	6229805	5785797		6045459	5467093							38	36	36	37	37	37
	P17183	Gamma-enolase	ENOG_MOUSE	Eno2	941497	749346	1117357	609256	892586	836968		936067	779603			yeast mito homolog				5	5	5	5	5	5
	P21550	Beta-enolase	ENOB_MOUSE	Eno3	604225	447422	537682	359551	395223	427148		529776	393974			yeast mito homolog				12	12	11	12	12	11
	Q8BGB7	Enolase-phosphatase E1	ENOPH_MOUSE	Enoph1	127941	108450	102328	103922	107405	101043		112906	104123							5	6	6	6	5	6
	Q8BTJ4;Q8BTJ4-2	Bis(5'-adenosyl)-triphosphatase enpp4;Isoform 2 of Bis(5'-adenosyl)-triphosphatase enpp4	ENPP4_MOUSE	Enpp4	3977	3686	3545	2320	2923	3165		3736	2802.67			induction, MS/MS				6	6	5	6	5	5
	P60840;P60840-2	Alpha-endosulfine;Isoform 2 of Alpha-endosulfine	ENSA_MOUSE	Ensa	42680	56100	54628	45652	46495	47602		51136	46583							9	9	8	8	8	8
	P55772	Ectonucleoside triphosphate diphosphohydrolase 1	ENTP1_MOUSE	Entpd1	22554	16169	22210	9894	18682	14731		20311	14435.7							12	12	12	12	13	12
	Q9WUZ9	Ectonucleoside triphosphate diphosphohydrolase 5	ENTP5_MOUSE	Entpd5	19185	16246	17361	11452	17317	15965		17597.3	14911.3			coexpression				10	9	10	9	10	10
	Q3U0P5	Ectonucleoside triphosphate diphosphohydrolase 6	Q3U0P5_MOUSE	Entpd6	1278	1312	1178	728	1025	1213		1256	988.667							4	4	4	4	4	4
	Q9JIX0	Transcription and mRNA export factor ENY2	ENY2_MOUSE	Eny2	48593	44790	49800	40219	47235	44636		47727.7	44030			coexpression				5	5	5	5	5	4
	O54839	Eomesodermin homolog	EOMES_MOUSE	Eomes	7888	6787	50113	4864	11253	6517		21596	7544.67							19	19	20	18	20	19
	B2RWS6	Histone acetyltransferase p300	EP300_MOUSE	Ep300	739	772	744	566	650	639		751.667	618.333							20	20	20	18	20	20
	Q8CHI8;Q8CHI8-2;Q8CHI8-3;Q8CHI8-4	E1A-binding protein p400;Isoform 2 of E1A-binding protein p400;Isoform 3 of E1A-binding protein p400;Isoform 4 of E1A-binding protein p400	EP400_MOUSE	Ep400	2099	2376	2183	2039	2433	2169		2219.33	2213.67			mito protein domain				37	36	38	37	38	37
	P48193;P48193-2	Protein 4.1;Isoform 2 of Protein 4.1	41_MOUSE	Epb41	10157	10185	10128	8580	9716	9560		10156.7	9285.33			coexpression				22	22	22	21	22	22
	O70318	Band 4.1-like protein 2	E41L2_MOUSE	Epb41l2	12609	12827	12927	11858	13098	12676		12787.7	12544							40	40	39	40	39	40
	Q9WV92;Q9WV92-2;Q9WV92-3	Band 4.1-like protein 3;Isoform 2 of Band 4.1-like protein 3;Isoform 3 of Band 4.1-like protein 3	E41L3_MOUSE	Epb41l3	1457	1229	1055	899	1074	1040		1247	1004.33							5	6	4	5	5	5
	Q8C9X6;Q8C9X6-2	Enhancer of polycomb homolog 1;Isoform 2 of Enhancer of polycomb homolog 1	EPC1_MOUSE	Epc1	476	466	434	371	370	446		458.667	395.667							6	6	6	5	5	6
	Q8C0I4	Enhancer of polycomb homolog 2	EPC2_MOUSE	Epc2	948	959	957	822	821	823		954.667	822							4	4	4	4	4	4
	Q80TA9	Ectopic P granules protein 5 homolog	EPG5_MOUSE	Epg5	161	135	130	89	122	118		142	109.667							7	7	7	7	7	7
	Q9D379	Epoxide hydrolase 1	HYEP_MOUSE	Ephx1	1297	2035	1438	3162	1076	1607		1590	1948.33			mito protein domain				5	5	6	5	4	6
	Q8VEH5	EPM2A-interacting protein 1	EPMIP_MOUSE	Epm2aip1	1784	1605	1587	1443	1768	1588		1658.67	1599.67							8	8	8	8	8	8
	Q80VP1;Q80VP1-2	Epsin-1;Isoform 2 of Epsin-1	EPN1_MOUSE	Epn1	2929	3127	2293	2363	2774	2148		2783	2428.33			coexpression				5	5	5	5	5	5
	Q8CGC7	Bifunctional glutamate/proline--tRNA ligase	SYEP_MOUSE	Eprs1	84669	85453	84644	67327	78771	78305		84922	74801			Rickettsial homolog, mito protein domain, coexpression				97	100	96	97	92	97
	P42567	Epidermal growth factor receptor substrate 15	EPS15_MOUSE	Eps15	11370	10544	11632	9008	10985	10360		11182	10117.7			mito protein domain				25	25	25	25	24	25
	Q60902;Q60902-2	Epidermal growth factor receptor substrate 15-like 1;Isoform 2 of Epidermal growth factor receptor substrate 15-like 1	EP15R_MOUSE	Eps15l1	18912	14060	15891	11860	15783	15749		16287.7	14464							35	34	35	34	34	35
	Q08509	Epidermal growth factor receptor kinase substrate 8	EPS8_MOUSE	Eps8	323	192	538	270	435	317		351	340.667			mito protein domain				1	1	2	2	1	2
	Q8VDI1	Epithelial-stromal interaction protein 1	ESIP1_MOUSE	Epsti1	34328	38717	38582	20550	32980	29980		37209	27836.7							13	13	13	13	13	13
	Q9CZU4	GTPase Era, mitochondrial	ERAL1_MOUSE	Eral1	30516	26794	26476	18881	22861	23817		27928.7	21853		MitoCarta3.0	APEX_matrix, targetP signal+, yeast mito homolog+, Rickettsial homolog, mito protein domain, induction, coexpression++	Matrix	Mitochondrial central dogma > mtRNA metabolism > mtRNA granules | Mitochondrial central dogma > Translation > Mitochondrial ribosome assembly		7	7	7	7	7	7
	Q9EQH2	Endoplasmic reticulum aminopeptidase 1	ERAP1_MOUSE	Erap1	98797	95590	92618	67645	84106	80863		95668.3	77538			yeast mito homolog, mito protein domain				49	49	46	49	46	48
	Q80TH2;Q80TH2-1;Q80TH2-2	Erbin;Isoform 1 of Erbin;Isoform 2 of Erbin	ERBIN_MOUSE	Erbin	4862	4983	4342	4777	4079	4189		4729	4348.33			yeast mito homolog, mito protein domain				17	17	17	17	16	17
	Q99MI1;Q99MI1-2	ELKS/Rab6-interacting/CAST family member 1;Isoform 2 of ELKS/Rab6-interacting/CAST family member 1	RB6I2_MOUSE	Erc1	302	237	245	207	271	144		261.333	207.333							4	4	4	4	4	3
	P07903	DNA excision repair protein ERCC-1	ERCC1_MOUSE	Ercc1	1499	1533	1496	1632	1387	1834		1509.33	1617.67			mito protein domain				5	6	5	6	5	6
	O08811	General transcription and DNA repair factor IIH helicase subunit XPD	ERCC2_MOUSE	Ercc2	2067	2231	2157	2014	2224	1987		2151.67	2075							8	9	9	9	9	9
	P49135	General transcription and DNA repair factor IIH helicase subunit XPB	ERCC3_MOUSE	Ercc3	2794	2459	2310	2146	2380	2299		2521	2275			mito protein domain				14	14	14	14	14	14
	Q9QZD4	DNA repair endonuclease XPF	XPF_MOUSE	Ercc4	1621	1243	1299	1234	1256	1308		1387.67	1266							11	11	11	11	11	11
	Q8BHK9	DNA excision repair protein ERCC-6-like	ERC6L_MOUSE	Ercc6l	145498	22076	149366	17085	151222	18626		105647	62311			mito protein domain				26	26	26	26	26	26
	Q9ERY9	Ergosterol biosynthetic protein 28 homolog	ERG28_MOUSE	Erg28	10903	14175	13171	10312	12160	13275		12749.7	11915.7			MS/MS				5	5	5	5	5	5
	Q9DC16	Endoplasmic reticulum-Golgi intermediate compartment protein 1	ERGI1_MOUSE	Ergic1	12451	13164	11416	12543	12493	11785		12343.7	12273.7							11	11	11	11	11	11
	Q9CR89	Endoplasmic reticulum-Golgi intermediate compartment protein 2	ERGI2_MOUSE	Ergic2	3203	3059	2726	2379	2783	2587		2996	2583			targetP signal, coexpression				5	5	5	5	5	5
	Q9CQE7;Q9CQE7-2	Endoplasmic reticulum-Golgi intermediate compartment protein 3;Isoform 2 of Endoplasmic reticulum-Golgi intermediate compartment protein 3	ERGI3_MOUSE	Ergic3	3457	3423	3675	2595	4020	3335		3518.33	3316.67							6	6	6	6	6	6
	P84089	Enhancer of rudimentary homolog	ERH_MOUSE	Erh	227418	194406	187742	175112	220154	191554		203189	195607							7	7	6	6	7	6
	Q7TMF2	3'-5' exoribonuclease 1	ERI1_MOUSE	Eri1	20426	20270	20934	16172	19563	19529		20543.3	18421.3			mito protein domain				10	10	10	10	10	10
	Q8C460;Q8C460-2;Q8C460-3	ERI1 exoribonuclease 3;Isoform 2 of ERI1 exoribonuclease 3;Isoform 3 of ERI1 exoribonuclease 3	ERI3_MOUSE	Eri3	2863	2558	2296	2633	2592	2365		2572.33	2530		MitoCarta3.0	targetP signal+, mito protein domain, MS/MS	Matrix			3	3	3	3	3	3
	E9PY43	Glutamate-rich 1	E9PY43_MOUSE	Erich1	1143	1174	1236	1095	1079	1168		1184.33	1114							2	2	2	2	2	2
	Q8VEH8	Endoplasmic reticulum lectin 1	ERLEC_MOUSE	Erlec1	884	1064	902	838	813	842		950	831			induction				5	5	5	5	5	5
	Q91X78	Erlin-1	ERLN1_MOUSE	Erlin1	474	539	396	459	440	458		469.667	452.333			Rickettsial homolog, mito protein domain, coexpression				2	2	2	2	2	2
	Q8BFZ9	Erlin-2	ERLN2_MOUSE	Erlin2	8298	7713	7384	5839	6944	6885		7798.33	6556			mito protein domain				9	9	9	8	9	9
	Q3UVK0	Endoplasmic reticulum metallopeptidase 1	ERMP1_MOUSE	Ermp1	10037	9576	9163	6939	8219	8264		9592	7807.33							18	17	18	18	17	17
	Q8R180	ERO1-like protein alpha	ERO1A_MOUSE	Ero1a	42340	37825	45963	26103	38260	35522		42042.7	33295			induction				28	28	28	28	27	27
	Q8R2E9	ERO1-like protein beta	ERO1B_MOUSE	Ero1b	27120	23264	19618	12227	19956	19665		23334	17282.7							9	10	10	9	10	10
	P57759	Endoplasmic reticulum resident protein 29	ERP29_MOUSE	Erp29	77430	74896	78188	59461	72524	68932		76838	66972.3							12	12	11	12	12	12
	Q9D1Q6	Endoplasmic reticulum resident protein 44	ERP44_MOUSE	Erp44	65791	61679	61129	47056	52000	56613		62866.3	51889.7			Rickettsial homolog, mito protein domain+				18	18	17	17	18	17
	Q8CIB9	N-acetyltransferase ESCO2	ESCO2_MOUSE	Esco2	7129	5841	4789	3928	5437	4553		5919.67	4639.33							9	10	10	10	10	10
	Q9R0P3	S-formylglutathione hydrolase	ESTD_MOUSE	Esd	169919	163242	165588	142732	150434	154288		166250	149151			targetP signal				16	15	16	14	16	16
	Q3V1V3	ESF1 homolog	ESF1_MOUSE	Esf1	3598	3396	3410	2662	3663	3318		3468	3214.33							20	22	22	21	22	22
	P60330	Separin	ESPL1_MOUSE	Espl1	1122	1156	1181	760	1178	1087		1153	1008.33			yeast mito homolog				15	15	15	13	16	15
	O08580	Steroid hormone receptor ERR1	ERR1_MOUSE	Esrra	195	231	225	216	182	213		217	203.667			mito protein domain, induction				2	2	2	2	2	2
	O70279	Splicing factor ESS-2 homolog	ESS2_MOUSE	Ess2	1857	1734	1793	1437	1998	1680		1794.67	1705			targetP signal				8	8	8	8	8	8
	Q3U7R1	Extended synaptotagmin-1	ESYT1_MOUSE	Esyt1	325904	335785	330652	227424	292008	278182		330780	265871			yeast mito homolog				63	63	62	63	62	64
	Q3TZZ7	Extended synaptotagmin-2	ESYT2_MOUSE	Esyt2	22699	23485	22784	16776	19739	19343		22989.3	18619.3							33	33	34	33	34	33
	Q8BWY3	Eukaryotic peptide chain release factor subunit 1	ERF1_MOUSE	Etf1	122945	111966	118524	86142	113728	113240		117812	104370							30	30	29	29	29	30
	Q99LC5	Electron transfer flavoprotein subunit alpha, mitochondrial	ETFA_MOUSE	Etfa	190102	188711	181934	165751	170780	173510		186916	170014		MitoCarta3.0	literature, APEX_matrix, targetP signal, yeast mito homolog++, mito protein domain, induction, coexpression++, MS/MS++	Matrix	Metabolism > Lipid metabolism > Fatty acid oxidation | Metabolism > Amino acid metabolism > Branched-chain amino acid metabolism | Metabolism > Amino acid metabolism > Lysine metabolism | Metabolism > Amino acid metabolism > Glycine metabolism | Metabolism > Vitamin metabolism > Choline and betaine metabolism | Metabolism > Electron carriers > Q-linked reactions, other		18	17	17	18	17	17
	Q9DCW4	Electron transfer flavoprotein subunit beta	ETFB_MOUSE	Etfb	239814	260027	245808	220154	222587	227855		248550	223532		MitoCarta3.0	literature, APEX_matrix, yeast mito homolog, mito protein domain, induction, coexpression+, MS/MS++	Matrix	Metabolism > Lipid metabolism > Fatty acid oxidation | Metabolism > Amino acid metabolism > Branched-chain amino acid metabolism | Metabolism > Amino acid metabolism > Lysine metabolism | Metabolism > Amino acid metabolism > Glycine metabolism | Metabolism > Vitamin metabolism > Choline and betaine metabolism | Metabolism > Electron carriers > Q-linked reactions, other		15	16	16	16	16	16
	Q921G7	Electron transfer flavoprotein-ubiquinone oxidoreductase, mitochondrial	ETFD_MOUSE	Etfdh	14002	14178	13370	12590	13050	13114		13850	12918		MitoCarta3.0	literature, APEX_matrix, yeast mito homolog++, mito protein domain+, induction, coexpression++, MS/MS++	MIM	Metabolism > Lipid metabolism > Fatty acid oxidation | Metabolism > Amino acid metabolism > Branched-chain amino acid metabolism | Metabolism > Amino acid metabolism > Lysine metabolism | Metabolism > Amino acid metabolism > Glycine metabolism | Metabolism > Metals and cofactors > Fe-S-containing proteins | Metabolism > Vitamin metabolism > Choline and betaine metabolism | Metabolism > Electron c…		21	21	21	21	21	21
	Q9DCM0	Persulfide dioxygenase ETHE1, mitochondrial	ETHE1_MOUSE	Ethe1	18854	18819	18549	15887	16246	17965		18740.7	16699.3		MitoCarta3.0	literature, APEX_matrix, targetP signal, yeast mito homolog++, mito protein domain, induction, MS/MS++	Matrix	Metabolism > Sulfur metabolism		10	11	11	11	11	11
	Q9D4V0	Ethanolamine kinase 1	EKI1_MOUSE	Etnk1	5482	5156	5175	3296	4799	4635		5271	4243.33			mito protein domain				6	6	6	6	6	6
	P27577	Protein C-ets-1	ETS1_MOUSE	Ets1	10722	9928	10042	6815	8950	8726		10230.7	8163.67							11	11	11	10	11	11
	Q8R4Z4	ETS translocation variant 3	ETV3_MOUSE	Etv3	1086	1170	1263	1008	1320	1276		1173	1201.33							5	5	6	6	5	6
	P97360	Transcription factor ETV6	ETV6_MOUSE	Etv6	668	785	695	653	761	1535		716	983							3	3	3	3	3	3
	Q9D7G4	Protein EURL homolog	EURL_MOUSE	Eurl	1468	1548	1588	1238	1616	1533		1534.67	1462.33							4	4	4	4	4	4
	Q8VD58	Protein EVI2B	EVI2B_MOUSE	Evi2b	6527	5935	5779	4288	5761	5365		6080.33	5138							4	3	3	3	4	3
	P70429	Ena/VASP-like protein	EVL_MOUSE	Evl	141353	151258	141434	100322	121819	119834		144682	113992							24	24	23	23	24	23
	Q61545	RNA-binding protein EWS	EWS_MOUSE	Ewsr1	76268	75252	74782	69294	78047	71471		75434	72937.3			mito protein domain				10	10	10	10	10	10
	Q8R3S6	Exocyst complex component 1	EXOC1_MOUSE	Exoc1	6911	61130	58288	46269	56028	55956		42109.7	52751							21	20	19	20	18	20
	Q9D4H1	Exocyst complex component 2	EXOC2_MOUSE	Exoc2	8973	8645	9800	8361	7601	9321		9139.33	8427.67							19	19	19	20	19	19
	Q6KAR6	Exocyst complex component 3	EXOC3_MOUSE	Exoc3	6081	5960	5342	4532	5181	5097		5794.33	4936.67							20	20	19	20	20	19
	O35382	Exocyst complex component 4	EXOC4_MOUSE	Exoc4	10622	12083	11860	10169	12278	11089		11521.7	11178.7							30	29	29	28	29	28
	Q3TPX4	Exocyst complex component 5	EXOC5_MOUSE	Exoc5	8902	8269	7952	6308	7044	6450		8374.33	6600.67							21	21	21	20	21	20
	Q8R313	Exocyst complex component 6	EXOC6_MOUSE	Exoc6	6297	5541	5473	4002	5330	4749		5770.33	4693.67							18	18	18	18	18	17
	O35250;O35250-2	Exocyst complex component 7;Isoform 2 of Exocyst complex component 7	EXOC7_MOUSE	Exoc7	5981	5903	5296	4543	5151	5125		5726.67	4939.67							18	17	17	17	17	18
	Q6PGF7	Exocyst complex component 8	EXOC8_MOUSE	Exoc8	20279	26817	26259	21179	20776	22998		24451.7	21651			targetP signal				21	21	20	21	21	21
	Q8C163	Nuclease EXOG, mitochondrial	EXOG_MOUSE	Exog	3932	4120	3530	3436	3411	3379		3860.67	3408.67		MitoCarta3.0	APEX_IMS, targetP signal, yeast mito homolog, mito protein domain, MS/MS++	MIM	Mitochondrial central dogma > mtDNA maintenance > mtDNA replication | Mitochondrial central dogma > mtDNA maintenance > mtDNA repair | Mitochondrial central dogma > mtDNA maintenance > mtDNA stability and decay		8	8	8	8	8	8
	Q9DAA6	Exosome complex component CSL4	EXOS1_MOUSE	Exosc1	41917	42933	42780	41460	40226	42515		42543.3	41400.3			Rickettsial homolog, coexpression				9	9	9	9	8	9
	P56960	Exosome component 10	EXOSX_MOUSE	Exosc10	22793	23050	21899	21674	21966	21712		22580.7	21784			Rickettsial homolog, mito protein domain				40	41	40	40	39	40
	Q8VBV3	Exosome complex component RRP4	EXOS2_MOUSE	Exosc2	31653	32062	30716	30888	30668	30639		31477	30731.7							12	12	12	12	13	12
	Q7TQK4	Exosome complex component RRP40	EXOS3_MOUSE	Exosc3	38032	33949	34045	32770	34084	33730		35342	33528							14	15	14	15	13	14
	Q921I9	Exosome complex component RRP41	EXOS4_MOUSE	Exosc4	44672	41458	39900	41590	40630	40450		42010	40890			Rickettsial homolog, mito protein domain, coexpression				7	7	7	7	7	7
	Q9CRA8	Exosome complex component RRP46	EXOS5_MOUSE	Exosc5	37005	36302	30332	33497	39978	35385		34546.3	36286.7			Rickettsial homolog, mito protein domain				10	10	8	10	9	9
	Q8BTW3	Exosome complex component MTR3	EXOS6_MOUSE	Exosc6	26052	27166	28299	25959	26358	27618		27172.3	26645			mito protein domain				9	10	9	10	9	10
	Q9D0M0	Exosome complex exonuclease RRP42	EXOS7_MOUSE	Exosc7	29950	26633	25849	26615	27004	26179		27477.3	26599.3			mito protein domain				13	13	13	13	13	13
	Q9D753	Exosome complex component RRP43	EXOS8_MOUSE	Exosc8	42432	43089	42481	41045	42343	43635		42667.3	42341			Rickettsial homolog, mito protein domain				13	12	12	13	12	12
	Q9JHI7	Exosome complex component RRP45	EXOS9_MOUSE	Exosc9	30226	32367	29712	28997	27031	29161		30768.3	28396.3			mito protein domain				12	12	12	11	12	12
	P70428	Exostosin-2	EXT2_MOUSE	Ext2	141	324	314	240	154	155		259.667	183							1	2	2	2	1	1
	P97480	Eyes absent homolog 3	EYA3_MOUSE	Eya3	6816	6289	6454	4860	5247	5969		6519.67	5358.67							11	12	11	12	11	11
	P70351	Histone-lysine N-methyltransferase EZH1	EZH1_MOUSE	Ezh1	24	65	17	12	45	13		35.3333	23.3333							2	2	1	1	2	1
	Q61188	Histone-lysine N-methyltransferase EZH2	EZH2_MOUSE	Ezh2	11503	10648	10377	8190	10412	10013		10842.7	9538.33							27	27	26	26	26	26
	P26040	Ezrin	EZRI_MOUSE	Ezr	223861	202011	205290	148658	203840	215630		210387	189376							35	34	34	34	34	35
	Q8BH61	Coagulation factor XIII A chain	F13A_MOUSE	F13a1	2179	1946	1652	1889	1463	1611		1925.67	1654.33							2	2	2	2	2	2
	P19221	Prothrombin	THRB_MOUSE	F2	19345	19270	13467	15299	9648	12473		17360.7	12473.3			mito protein domain				7	7	7	7	7	7
	P30558	Proteinase-activated receptor 1	PAR1_MOUSE	F2r	1865	1625	1841	1465	1809	1615		1777	1629.67							4	3	3	3	3	4
	O88783	Coagulation factor V	FA5_MOUSE	F5	2402	3584	2549	3172	1645	2162		2845	2326.33							9	9	9	9	9	9
	Q00558	40-kDa huntingtin-associated protein	HAP40_MOUSE	F8a1	1190	1313	1246	1057	1118	1152		1249.67	1109							3	3	3	3	3	3
	O08914	Fatty-acid amide hydrolase 1	FAAH1_MOUSE	Faah	10645	9654	10012	8520	8113	9188		10103.7	8607			Rickettsial homolog, mito protein domain				17	18	17	18	17	17
	A2ACJ2	Fanconi anemia core complex-associated protein 100	FP100_MOUSE	Faap100	300	311	308	242	307	275		306.333	274.667							3	3	3	3	3	3
	Q05816	Fatty acid-binding protein 5	FABP5_MOUSE	Fabp5	196563	164957	183646	179133	185934	177935		181722	181001			mito protein domain				15	14	14	14	14	15
	Q61160	FAS-associated death domain protein	FADD_MOUSE	Fadd	4338	3530	3710	3302	4024	3731		3859.33	3685.67							4	4	4	3	3	4
	Q920L1	Acyl-CoA (8-3)-desaturase	FADS1_MOUSE	Fads1	546	487	589	484	568	563		540.667	538.333			mito protein domain, coexpression				3	3	3	2	3	3
	Q9Z0R9	Acyl-CoA 6-desaturase	FADS2_MOUSE	Fads2	1044	72	673	4	117	188		596.333	103			mito protein domain, coexpression				5	3	7	1	3	5
	P54731	FAS-associated factor 1	FAF1_MOUSE	Faf1	14672	12057	12847	9189	11125	12412		13192	10908.7			coexpression				17	16	17	16	15	16
	Q3TDN2	FAS-associated factor 2	FAF2_MOUSE	Faf2	17496	18098	14092	13323	14222	14565		16562	14036.7			mito protein domain				15	15	15	15	15	14
	P35505	Fumarylacetoacetase	FAAA_MOUSE	Fah	987	795	515	548	686	683		765.667	639			mito protein domain, coexpression				6	6	4	5	5	6
	A0A0R4J094	Fumarylacetoacetate hydrolase domain-containing 2A	A0A0R4J094_MOUSE	Fahd2a	1952	2228	1956	2304	1888	1900		2045.33	2030.67							4	4	4	4	4	4
	Q9WUD8	Fas apoptotic inhibitory molecule 1	FAIM1_MOUSE	Faim	21887	18895	18383	14015	18762	17841		19721.7	16872.7							8	8	8	8	8	8
	Q78T81	Protein FAM102A	F102A_MOUSE	Fam102a	3856	3693	3590	1970	3458	3165		3713	2864.33							7	7	7	7	7	7
	Q3TGF2	Protein FAM107B	F107B_MOUSE	Fam107b	395515	247116	274329	296719	263569	240420		305653	266903							14	14	15	15	15	15
	Q9D2L9	Protein FAM111A	F111A_MOUSE	Fam111a	2767	2364	2710	1715	2547	2429		2613.67	2230.33			mito protein domain				11	11	11	11	11	10
	Q9D281	Protein Noxp20	NXP20_MOUSE	Fam114a1	294	133	221	125	305	207		216	212.333							2	1	2	2	2	2
	Q8VE88;Q8VE88-2	Protein FAM114A2;Isoform 2 of Protein FAM114A2	F1142_MOUSE	Fam114a2	9074	7671	8267	6004	7839	7839		8337.33	7227.33			coexpression				16	16	16	15	15	16
	Q91YN1	Protein FAM118A	F118A_MOUSE	Fam118a	930	856	823	718	853	754		869.667	775			induction				5	5	5	5	5	5
	Q8C569	Protein FAM118B	F118B_MOUSE	Fam118b	1790	1874	1901	1270	1619	1661		1855	1516.67							7	7	7	7	7	7
	Q6A0A9	Constitutive coactivator of PPAR-gamma-like protein 1	F120A_MOUSE	FAM120A	28121	28821	28765	20849	25129	24766		28569	23581.3							42	43	43	42	42	42
	Q6P9N1	Hyccin	HYCCI_MOUSE	Fam126a	6083	6548	5940	4722	6054	5630		6190.33	5468.67							7	8	8	8	8	8
	Q9CVI2;Q9CVI2-2	Protein FAM133B;Isoform 2 of Protein FAM133B	F133B_MOUSE	Fam133b	3209	4012	4231	4287	4453	4077		3817.33	4272.33							4	4	4	4	4	4
	Q9CR98	Protein FAM136A	F136A_MOUSE	Fam136a	15431	14806	14085	13031	14227	13026		14774	13428		MitoCarta3.0	APEX_IMS, mito protein domain+, MS/MS++	IMS			9	9	8	8	8	8
	Q8CDM8	Protein FAM160B1	F16B1_MOUSE	Fam160b1	2319	1843	1826	1306	1707	1415		1996	1476							8	8	8	7	7	8
	Q9D6U8	Protein FAM162A	F162A_MOUSE	Fam162a	63206	65860	66982	51025	50061	54106		65349.3	51730.7		MitoCarta3.0	APEX_IMS, APEX_matrix, targetP signal, induction, coexpression, MS/MS++	MIM			7	7	7	7	7	7
	Q8CHT6	Protein FAM169B	F169B_MOUSE	Fam169b	9204	8962	8485	7227	8025	8209		8883.67	7820.33							9	9	9	9	9	9
	Q3TNH5	Cotranscriptional regulator FAM172A	F172A_MOUSE	Fam172a	4024	3590	3659	3436	3913	4005		3757.67	3784.67							6	6	6	6	6	6
	Q8BR63	Protein FAM177A1	F177A_MOUSE	Fam177a1	5840	6550	6146	3739	6502	5377		6178.67	5206							7	7	7	6	7	6
	Q7TPD2	Protein FAM185A	F185A_MOUSE	Fam185a	199	177	106	145	95	84		160.667	108		MitoCarta3.0	APEX_matrix, targetP signal, coexpression	Matrix			2	2	2	2	1	1
	P58468	Protein FAM207A	F207A_MOUSE	Fam207a	22225	23325	23388	20490	23225	21863		22979.3	21859.3			targetP signal				8	8	8	8	8	8
	Q8CID3	Pseudokinase FAM20A	FA20A_MOUSE	Fam20a	470	332	305	238	581	339		369	386							1	2	1	2	2	2
	Q8VCS3	Glycosaminoglycan xylosylkinase	XYLK_MOUSE	Fam20b	1032	1194	1103	682	1038	884		1109.67	868							3	4	4	3	4	4
	Q8BGY7	Protein FAM210A	F210A_MOUSE	Fam210a	5544	4749	4513	4189	4388	4931		4935.33	4502.67		MitoCarta3.0	GFP, targetP signal, induction, coexpression++, MS/MS	MIM			4	4	4	4	4	4
	Q8BYI8;Q8BYI8-2	Protein FAM234B;Isoform 2 of Protein FAM234B	F234B_MOUSE	Fam234b	229	151	178	85	177	142		186	134.667							2	2	2	2	2	2
	Q9CR80	Protein FAM32A	FA32A_MOUSE	Fam32a	4376	4389	3851	4634	3907	3771		4205.33	4104							2	2	2	2	2	2
	Q9D8T0	Protein FAM3A	FAM3A_MOUSE	Fam3a	7147	7360	6063	4766	5627	5443		6856.67	5278.67							3	3	3	3	3	3
	Q91VU0	Protein FAM3C	FAM3C_MOUSE	Fam3c	16020	16211	15740	10640	12449	12725		15990.3	11938							9	9	9	8	9	9
	Q9WV03	Protein FAM50A	FA50A_MOUSE	Fam50a	12628	12552	13093	10238	12827	11744		12757.7	11603							9	8	9	8	9	9
	Q922G2;Q922G2-2	Protein FAM76A;Isoform 2 of Protein FAM76A	FA76A_MOUSE	Fam76a	670	664	924	796	975	664		752.667	811.667							2	2	2	3	2	2
	Q80XP8	Protein FAM76B	FA76B_MOUSE	Fam76b	9628	8465	8231	7597	8812	8985		8774.67	8464.67							11	10	10	10	11	10
	Q3UVG3	Protein FAM91A1	F91A1_MOUSE	Fam91a1	3373	2647	2304	712	3347	860		2774.67	1639.67							9	10	9	9	10	9
	Q3TJZ6	Protein FAM98A	FA98A_MOUSE	Fam98a	4873	4415	4497	3278	4688	4314		4595	4093.33							8	8	8	8	8	8
	Q80VD1	Protein FAM98B	FA98B_MOUSE	Fam98b	42295	43822	43184	41191	43323	42187		43100.3	42233.7			yeast mito homolog				18	18	17	18	17	18
	E9PYD1	Family with sequence similarity 98, member C	E9PYD1_MOUSE	Fam98c	2968	3839	3516	4151	2949	3397		3441	3499							7	7	7	7	7	7
	Q9JL70	Fanconi anemia group A protein homolog	FANCA_MOUSE	Fanca	504	429	347	390	388	341		426.667	373							3	3	3	3	3	3
	Q80V62	Fanconi anemia group D2 protein homolog	FACD2_MOUSE	Fancd2	2832	2604	2395	2192	2415	2221		2610.33	2276							23	24	23	24	24	23
	Q8K368	Fanconi anemia group I protein homolog	FANCI_MOUSE	Fanci	10655	8710	8864	7116	9037	8595		9409.67	8249.33							47	47	45	44	46	46
	Q922J9;Q922J9-4	Fatty acyl-CoA reductase 1;Isoform 4 of Fatty acyl-CoA reductase 1	FACR1_MOUSE	Far1	66714	47035	60094	35277	39385	37361		57947.7	37341			mito protein domain				25	25	24	23	24	25
	F8VPU2	FERM, ARHGEF and pleckstrin domain-containing protein 1	FARP1_MOUSE	Farp1	163	119	135	66	120	109		139	98.3333			mito protein domain				4	4	4	2	4	4
	Q99M01	Phenylalanine--tRNA ligase, mitochondrial	SYFM_MOUSE	Fars2	890	762	646	638	698	599		766	645		MitoCarta3.0	literature, APEX_matrix, targetP signal, yeast mito homolog+, Rickettsial homolog, mito protein domain, induction, coexpression, MS/MS	Matrix	Mitochondrial central dogma > Translation > mt-tRNA synthetases		3	3	3	3	3	3
	Q8C0C7	Phenylalanine--tRNA ligase alpha subunit	SYFA_MOUSE	Farsa	65995	57687	57343	44187	54682	46057		60341.7	48308.7			Rickettsial homolog, mito protein domain				24	24	24	25	24	25
	Q9WUA2	Phenylalanine--tRNA ligase beta subunit	SYFB_MOUSE	Farsb	91663	85321	87048	75371	81367	81117		88010.7	79285			Rickettsial homolog				34	33	34	34	34	34
	P19096	Fatty acid synthase	FAS_MOUSE	Fasn	260113	138243	147345	94205	143625	126617		181900	121482		MitoCarta3.0	yeast mito homolog, Rickettsial homolog, mito protein domain, coexpression	IMS	Metabolism > Lipid metabolism		131	128	129	126	132	130
	Q922E6	FAST kinase domain-containing protein 2, mitochondrial	FAKD2_MOUSE	Fastkd2	2596	2241	2009	1732	1968	2088		2282	1929.33		MitoCarta3.0	literature, APEX_matrix, targetP signal+, induction, coexpression, MS/MS	Matrix	Mitochondrial central dogma > mtRNA metabolism > mtRNA granules | Mitochondrial central dogma > mtRNA metabolism > Polycistronic mtRNA processing | Mitochondrial central dogma > mtRNA metabolism > mtRNA stability and decay | Mitochondrial central dogma > Translation > Mitochondrial ribosome assembly		7	7	7	6	7	7
	Q7TMV3	FAST kinase domain-containing protein 5, mitochondrial	FAKD5_MOUSE	Fastkd5	407	342	270	294	284	328		339.667	302		MitoCarta3.0	APEX_matrix, targetP signal, coexpression	Matrix	Mitochondrial central dogma > mtRNA metabolism > mtRNA granules | Mitochondrial central dogma > mtRNA metabolism > Polycistronic mtRNA processing | Mitochondrial central dogma > mtRNA metabolism > mtRNA stability and decay		5	5	4	5	5	5
	P62862	40S ribosomal protein S30	RS30_MOUSE	Fau	839586	794454	817813	626000	730398	738875		817284	698424							5	5	5	5	5	5
	P35550	rRNA 2'-O-methyltransferase fibrillarin	FBRL_MOUSE	Fbl	331247	334794	326342	347596	331143	337626		330794	338788			mito protein domain				22	21	21	21	22	21
	Q08879	Fibulin-1	FBLN1_MOUSE	Fbln1	1674	1130	1163	1115	1149	1221		1322.33	1161.67							4	4	4	4	4	4
	E9PYR1;F8VQK6	F-box and leucine-rich repeat protein 18	E9PYR1_MOUSE;F8VQK6_MOUSE	Fbxl18	381	352	339	287	318	281		357.333	295.333			mito protein domain				3	3	3	3	3	3
	Q9CZV8;Q9CZV8-3;Q9CZV8-4	F-box/LRR-repeat protein 20;Isoform 3 of F-box/LRR-repeat protein 20;Isoform 2 of F-box/LRR-repeat protein 20	FXL20_MOUSE	Fbxl20	1298	1101	827	1062	1064	969		1075.33	1031.67			mito protein domain				4	4	4	4	4	4
	Q9QXW0	F-box/LRR-repeat protein 6	FBXL6_MOUSE	Fbxl6	624	418	969	251	449	938		670.333	546			targetP signal, mito protein domain				5	5	5	4	4	5
	Q8CIG9	F-box/LRR-repeat protein 8	FBXL8_MOUSE	Fbxl8	6100	6600	6020	6076	5164	5719		6240	5653			mito protein domain				8	8	8	8	8	8
	Q78JE5	F-box only protein 22	FBX22_MOUSE	Fbxo22	12725	12104	11834	9482	11959	11571		12221	11004			mito protein domain				9	9	9	9	9	9
	Q8BIG4	F-box only protein 28	FBX28_MOUSE	Fbxo28	2783	3628	3402	2956	3064	2759		3271	2926.33			mito protein domain				9	9	9	9	9	9
	Q9DC63;Q9DC63-2;Q9DC63-3	F-box only protein 3;Isoform 2 of F-box only protein 3;Isoform 3 of F-box only protein 3	FBX3_MOUSE	Fbxo3	3866	3402	3496	2801	2872	3092		3588	2921.67			yeast mito homolog, mito protein domain, coexpression				8	8	8	8	7	8
	Q8BJL1	F-box only protein 30	FBX30_MOUSE	Fbxo30	536	688	601	570	862	617		608.333	683			mito protein domain				2	4	3	4	4	4
	Q8VE08	F-box only protein 33	FBX33_MOUSE	Fbxo33	172	111	96	77	82	84		126.333	81			targetP signal, mito protein domain				2	2	2	2	2	2
	Q8BMI0	F-box only protein 38	FBX38_MOUSE	Fbxo38	851	1452	1421	1189	712	1325		1241.33	1075.33			mito protein domain				9	9	9	9	9	9
	Q8CHQ0	F-box only protein 4	FBX4_MOUSE	Fbxo4	1309	959	670	571	814	738		979.333	707.667			mito protein domain				3	3	3	2	2	2
	Q6PDJ6	F-box only protein 42	FBX42_MOUSE	Fbxo42	198	192	206	169	204	203		198.667	192			mito protein domain				2	2	2	2	2	2
	Q7TSG3	F-box only protein 5	FBX5_MOUSE	Fbxo5	1342	1268	1438	1244	1253	1272		1349.33	1256.33			targetP signal, mito protein domain				4	5	5	5	4	5
	Q9QZN4	F-box only protein 6	FBX6_MOUSE	Fbxo6	4002	3585	2995	2703	2512	3282		3527.33	2832.33			mito protein domain				7	7	6	7	6	7
	Q3U7U3	F-box only protein 7	FBX7_MOUSE	Fbxo7	3292	3550	3623	3105	2927	3248		3488.33	3093.33			mito protein domain				5	6	5	6	5	6
	Q8BK06;Q8BK06-2	F-box only protein 9;Isoform 2 of F-box only protein 9	FBX9_MOUSE	Fbxo9	19	79	81	78	20	14		59.6667	37.3333			mito protein domain				1	2	2	2	1	1
	Q5SRY7;Q5SRY7-2;Q5SRY7-3;Q5SRY7-4	F-box/WD repeat-containing protein 11;Isoform 2 of F-box/WD repeat-containing protein 11;Isoform 3 of F-box/WD repeat-containing protein 11;Isoform 4 of F-box/WD repeat-containing protein 11	FBW1B_MOUSE	Fbxw11	2020	1830	1865	1450	1709	1926		1905	1695			mito protein domain				8	8	8	7	7	7
	Q9CTH6	rRNA-processing protein FCF1 homolog	FCF1_MOUSE	Fcf1	8929	8852	8402	7760	7418	7294		8727.67	7490.67			mito protein domain				6	6	6	6	6	6
	Q8K285	F-BAR domain only protein 1	FCHO1_MOUSE	Fcho1	5100	5198	5092	3903	4768	4700		5130	4457							14	14	14	14	14	14
	P53798	Squalene synthase	FDFT_MOUSE	Fdft1	3539	3131	3727	1417	2826	2782		3465.67	2341.67			yeast mito homolog, mito protein domain				8	10	10	8	8	8
	Q920E5	Farnesyl pyrophosphate synthase	FPPS_MOUSE	Fdps	86480	66746	79518	39193	75848	67122		77581.3	60721		MitoCarta3.0	Rickettsial homolog, mito protein domain, MS/MS+	MIM	Metabolism > Lipid metabolism > Cholesterol-associated		20	18	20	17	19	19
	P46656	Adrenodoxin, mitochondrial	ADX_MOUSE	Fdx1	7426	6368	7130	4906	6090	5950		6974.67	5648.67		MitoCarta3.0	literature, APEX_matrix, targetP signal+, yeast mito homolog+, Rickettsial homolog, mito protein domain, induction, coexpression, MS/MS+	Matrix	Metabolism > Lipid metabolism > Cholesterol, bile acid, steroid synthesis | Metabolism > Metals and cofactors > Heme synthesis and processing | Metabolism > Metals and cofactors > Fe-S cluster biosynthesis | Metabolism > Metals and cofactors > Fe-S-containing proteins | Metabolism > Vitamin metabolism > Vitamin D metabolism		5	5	5	5	5	5
	Q9CPW2	Ferredoxin-2, mitochondrial	FDX2_MOUSE	Fdx2	2806	2971	3041	2665	4148	3172		2939.33	3328.33		MitoCarta3.0	APEX_matrix, targetP signal+, yeast mito homolog+, Rickettsial homolog, mito protein domain, coexpression, MS/MS	Matrix	Metabolism > Metals and cofactors > Heme synthesis and processing | Metabolism > Metals and cofactors > Fe-S cluster biosynthesis | Metabolism > Metals and cofactors > Fe-S-containing proteins		3	4	4	4	4	4
	Q61578	NADPH:adrenodoxin oxidoreductase, mitochondrial	ADRO_MOUSE	Fdxr	29928	41509	34392	29600	25080	26242		35276.3	26974		MitoCarta3.0	literature, APEX_matrix, targetP signal, yeast mito homolog++, coexpression, MS/MS++	Matrix	Metabolism > Lipid metabolism > Cholesterol, bile acid, steroid synthesis | Metabolism > Metals and cofactors > Heme synthesis and processing | Metabolism > Metals and cofactors > Fe-S cluster biosynthesis | Metabolism > Vitamin metabolism > Vitamin D metabolism		20	21	21	20	20	20
	Q9Z2G0	Protein fem-1 homolog B	FEM1B_MOUSE	Fem1b	251	159	186	142	204	164		198.667	170			Rickettsial homolog, mito protein domain				3	3	3	3	3	3
	P39749	Flap endonuclease 1	FEN1_MOUSE	Fen1	113859	115969	112793	109939	111712	106331		114207	109327							15	15	15	15	15	15
	Q8K1B8	Fermitin family homolog 3	URP2_MOUSE	Fermt3	204508	218626	227789	177244	187270	196680		216974	187065			mito protein domain				42	42	41	43	43	42
	Q8K0E8	Fibrinogen beta chain	FIBB_MOUSE	Fgb	4179	3036	4153	3576	3307	3853		3789.33	3578.67							4	4	4	4	4	4
	O88842	FYVE, RhoGEF and PH domain-containing protein 3	FGD3_MOUSE	Fgd3	9608	10425	6878	7752	9165	7885		8970.33	8267.33							14	14	14	14	14	13
	Q9CRA9;Q9CRA9-2	FGFR1 oncogene partner 2 homolog;Isoform 2 of FGFR1 oncogene partner 2 homolog	FGOP2_MOUSE	Fgfr1op2	9062	9153	8007	7217	8209	7748		8740.67	7724.67							9	8	8	8	8	8
	Q8VCM7	Fibrinogen gamma chain	FIBG_MOUSE	Fgg	7276	4162	6134	5400	5751	5947		5857.33	5699.33							4	4	4	4	4	4
	P12804	Fibroleukin	FGL2_MOUSE	Fgl2	2324	3423	3503	858	2837	1841		3083.33	1845.33							9	11	10	6	11	9
	P14234	Tyrosine-protein kinase Fgr	FGR_MOUSE	Fgr	953	914	853	514	810	752		906.667	692			mito protein domain				3	3	3	3	3	3
	P97807;P97807-2	Fumarate hydratase, mitochondrial;Isoform Cytoplasmic of Fumarate hydratase, mitochondrial	FUMH_MOUSE	Fh	119369	120958	118749	105351	114093	111187		119692	110210		MitoCarta3.0	literature, APEX_matrix, targetP signal+, yeast mito homolog, Rickettsial homolog, mito protein domain, induction, coexpression++, MS/MS++	Matrix	Metabolism > Carbohydrate metabolism > TCA cycle		27	27	25	27	25	26
	P97447	Four and a half LIM domains protein 1	FHL1_MOUSE	Fhl1	1319	1138	1018	716	952	742		1158.33	803.333							2	2	2	2	2	2
	O70433	Four and a half LIM domains protein 2	FHL2_MOUSE	Fhl2	6503	5776	6384	2923	4699	4788		6221	4136.67			yeast mito homolog				12	12	11	10	9	11
	Q9R059	Four and a half LIM domains protein 3	FHL3_MOUSE	Fhl3	11756	11557	12405	8037	12920	10747		11906	10568			yeast mito homolog				9	9	10	9	10	9
	Q6P9Q4	FH1/FH2 domain-containing protein 1	FHOD1_MOUSE	Fhod1	6134	6317	6331	4716	5824	5406		6260.67	5315.33							26	26	26	26	26	26
	Q9JI19	Acidic fibroblast growth factor intracellular-binding protein	FIBP_MOUSE	Fibp	7554	7022	5924	6331	6977	2797		6833.33	5368.33							7	7	7	7	7	5
	Q91WF7	Polyphosphoinositide phosphatase	FIG4_MOUSE	Fig4	1417	1319	1304	1165	1329	1342		1346.67	1278.67							5	4	4	6	5	5
	Q6P6L0;Q6P6L0-3	Filamin A-interacting protein 1-like;Isoform 3 of Filamin A-interacting protein 1-like	FIL1L_MOUSE	Filip1l	249	222	230	211	248	220		233.667	226.333							4	4	4	4	4	4
	Q9D824;Q9D824-2;Q9D824-3	Pre-mRNA 3'-end-processing factor FIP1;Isoform 2 of Pre-mRNA 3'-end-processing factor FIP1;Isoform 3 of Pre-mRNA 3'-end-processing factor FIP1	FIP1_MOUSE	Fip1l1	38757	34005	34587	30307	36804	33568		35783	33559.7							13	13	13	13	13	13
	Q9CQ92	Mitochondrial fission 1 protein	FIS1_MOUSE	Fis1	147189	112004	130332	61732	115802	70447		129842	82660.3		MitoCarta3.0	literature, yeast mito homolog++, mito protein domain+	MOM	Mitochondrial dynamics and surveillance > Fission		9	9	9	9	8	9
	Q9WTJ4	Flt3-interacting zinc finger protein 1	FIZ1_MOUSE	Fiz1	898	1123	1038	1060	961	975		1019.67	998.667							4	4	4	4	4	4
	Q6P9Q6	FK506-binding protein 15	FKB15_MOUSE	Fkbp15	6297	6784	6402	5047	6087	5619		6494.33	5584.33			mito protein domain				25	26	26	26	25	25
	P26883	Peptidyl-prolyl cis-trans isomerase FKBP1A	FKB1A_MOUSE	Fkbp1a	399169	372015	374085	296120	385532	352200		381756	344617			yeast mito homolog, mito protein domain				6	6	6	6	6	6
	P45878	Peptidyl-prolyl cis-trans isomerase FKBP2	FKBP2_MOUSE	Fkbp2	129940	129608	140774	101008	126385	120638		133441	116010			mito protein domain, coexpression				11	11	11	11	11	11
	Q62446	Peptidyl-prolyl cis-trans isomerase FKBP3	FKBP3_MOUSE	Fkbp3	245965	229940	241931	169887	233336	215179		239279	206134			yeast mito homolog, mito protein domain, coexpression				17	16	16	17	16	16
	P30416	Peptidyl-prolyl cis-trans isomerase FKBP4	FKBP4_MOUSE	Fkbp4	216391	206744	211248	166862	211245	202867		211461	193658			yeast mito homolog, mito protein domain, coexpression				43	44	43	43	41	40
	Q64378	Peptidyl-prolyl cis-trans isomerase FKBP5	FKBP5_MOUSE	Fkbp5	72950	72220	72061	56781	69215	66639		72410.3	64211.7			yeast mito homolog, mito protein domain				35	33	33	33	33	33
	O35465	Peptidyl-prolyl cis-trans isomerase FKBP8	FKBP8_MOUSE	Fkbp8	42658	43538	41279	31176	38059	39016		42491.7	36083.7		MitoCarta3.0	literature, yeast mito homolog, mito protein domain, coexpression, MS/MS	MOM	Mitochondrial dynamics and surveillance > Organelle contact sites | Mitochondrial dynamics and surveillance > Mitophagy | Mitochondrial dynamics and surveillance > Autophagy		14	14	13	14	14	14
	Q8R123;Q8R123-2	FAD synthase;Isoform 2 of FAD synthase	FAD1_MOUSE	Flad1	8350	7252	7002	5838	6166	6132		7534.67	6045.33		MitoCarta3.0	APEX_matrix, mito protein domain, induction, coexpression	Matrix	Metabolism > Vitamin metabolism > Vitamin B2 metabolism		14	14	14	14	13	14
	P26323	Friend leukemia integration 1 transcription factor	FLI1_MOUSE	Fli1	28498	47955	42645	36771	41098	37830		39699.3	38566.3							18	19	18	18	18	18
	Q9JJ28	Protein flightless-1 homolog	FLII_MOUSE	Flii	34962	34584	33472	24036	32300	29263		34339.3	28533			yeast mito homolog, mito protein domain				58	58	57	57	56	56
	Q8BTM8	Filamin-A	FLNA_MOUSE	Flna	236231	235062	218332	189965	210452	224716		229875	208378			MS/MS				148	150	146	150	145	148
	Q80X90	Filamin-B	FLNB_MOUSE	Flnb	13383	13084	12744	12048	12284	12540		13070.3	12290.7							75	76	75	75	74	75
	O08917	Flotillin-1	FLOT1_MOUSE	Flot1	13293	12580	12516	10194	11733	10961		12796.3	10962.7			Rickettsial homolog, mito protein domain, MS/MS				17	17	17	17	17	17
	Q60634	Flotillin-2	FLOT2_MOUSE	Flot2	18849	18113	17128	15625	17142	17390		18030	16719			mito protein domain				18	18	18	18	18	18
	Q9JL26	Formin-like protein 1	FMNL1_MOUSE	Fmnl1	99337	98800	96609	74533	92906	88457		98248.7	85298.7							60	61	62	59	58	60
	P35922;P35922-2;P35922-3	Synaptic functional regulator FMR1;Isoform 2 of Synaptic functional regulator FMR1;Isoform 3 of Synaptic functional regulator FMR1	FMR1_MOUSE	Fmr1	15485	14751	14654	12021	13376	13685		14963.3	13027.3							19	19	19	19	17	19
	P11276	Fibronectin	FINC_MOUSE	Fn1	17811	11142	16353	15072	13323	16377		15102	14924							29	28	28	29	29	29
	Q8K274	Ketosamine-3-kinase	KT3K_MOUSE	Fn3krp	2256	2261	2025	2225	1911	1898		2180.67	2011.33			mito protein domain				4	3	3	4	3	4
	Q80TY0-2	Isoform 2 of Formin-binding protein 1	FNBP1_MOUSE	Fnbp1	72615	69792	69082	57365	65402	62750		70496.3	61839			mito protein domain				34	34	33	34	31	33
	Q6ZQ03	Formin-binding protein 4	FNBP4_MOUSE	Fnbp4	5096	4996	4948	4414	4945	4914		5013.33	4757.67			mito protein domain				19	19	18	18	18	20
	Q8BX90	Fibronectin type-III domain-containing protein 3A	FND3A_MOUSE	Fndc3a	319	436	342	360	620	475		365.667	485							5	8	5	9	6	6
	Q61239	Protein farnesyltransferase/geranylgeranyltransferase type-1 subunit alpha	FNTA_MOUSE	Fnta	18984	18059	16617	14581	15998	16951		17886.7	15843.3							15	16	16	16	15	16
	Q8K2I1	Protein farnesyltransferase subunit beta	FNTB_MOUSE	Fntb	4849	4609	4330	4325	3675	4085		4596	4028.33							6	6	6	6	6	6
	A2AKG8	Focadhesin	FOCAD_MOUSE	Focad	1665	2695	1475	2488	1973	2700		1945	2387			coexpression				21	20	21	21	21	20
	P47930	Fos-related antigen 2	FOSL2_MOUSE	Fosl2	764	830	807	203	1178	673		800.333	684.667			mito protein domain				4	5	5	4	6	5
	Q8BUR3;Q8BUR3-2	Forkhead box protein J3;Isoform 2 of Forkhead box protein J3	FOXJ3_MOUSE	Foxj3	353	363	356	361	356	343		357.333	353.333			MS/MS				2	2	2	2	2	2
	P42128	Forkhead box protein K1	FOXK1_MOUSE	Foxk1	9568	11176	11156	9461	9571	10274		10633.3	9768.67			mito protein domain				14	15	15	15	14	15
	Q3UCQ1	Forkhead box protein K2	FOXK2_MOUSE	Foxk2	2614	2512	2527	1909	2645	2322		2551	2292			mito protein domain				11	11	11	10	11	10
	Q9R1E0	Forkhead box protein O1	FOXO1_MOUSE	Foxo1	4058	4985	4066	3925	3318	3319		4369.67	3520.67							11	11	11	11	10	11
	P58462	Forkhead box protein P1	FOXP1_MOUSE	Foxp1	15121	15556	14208	14142	13023	14119		14961.7	13761.3							17	17	17	17	17	17
	P48760;P48760-2;P48760-3;P48760-4;P48760-5	Folylpolyglutamate synthase, mitochondrial;Isoform 2 of Folylpolyglutamate synthase, mitochondrial;Isoform 3 of Folylpolyglutamate synthase, mitochondrial;Isoform 4 of Folylpolyglutamate synthase, mitochondrial;Isoform 5 of Folylpolyglutamate synthase, mitochondrial	FOLC_MOUSE	Fpgs	191	204	216	191	175	123		203.667	163		MitoCarta3.0	APEX_matrix, GFP, targetP signal, yeast mito homolog, Rickettsial homolog	Matrix	Metabolism > Vitamin metabolism > Folate and 1-C metabolism		2	2	2	2	2	2
	Q8BP78	Protein FRA10AC1 homolog	F10C1_MOUSE	Fra10ac1	4458	4505	4613	3859	4206	4131		4525.33	4065.33			coexpression				5	5	5	4	5	5
	P97376	Protein FRG1	FRG1_MOUSE	Frg1	62071	60031	60561	59899	57856	58350		60887.7	58701.7							14	14	14	14	14	14
	Q3UFK8	FERM domain-containing protein 8	FRMD8_MOUSE	Frmd8	11901	9757	10091	7057	8841	8633		10583	8177							14	14	14	14	14	14
	F8VQ05	FRY-like transcription coactivator	F8VQ05_MOUSE	Fryl	7804	7049	7003	4753	7228	6092		7285.33	6024.33			yeast mito homolog				63	64	62	63	61	64
	Q8BYN5;Q8BYN5-2	FSD1-like protein;Isoform 2 of FSD1-like protein	FSD1L_MOUSE	Fsd1l	90	8	93	357	114	189		63.6667	220			mito protein domain				2	1	2	3	2	3
	P09528	Ferritin heavy chain	FRIH_MOUSE	Fth1	37172	35921	37843	26853	32367	30699		36978.7	29973		MitoCarta3.0	mito protein domain, MS/MS++	unknown	Metabolism > Metals and cofactors > Iron homeostasis		13	13	13	13	12	13
	P29391	Ferritin light chain 1	FRIL1_MOUSE	Ftl1	40392	42017	34670	46282	39863	37291		39026.3	41145.3							8	9	8	9	8	9
	Q8BGW1	Alpha-ketoglutarate-dependent dioxygenase FTO	FTO_MOUSE	Fto	8020	7709	7832	6732	7433	7350		7853.67	7171.67			coexpression				12	13	12	12	13	12
	Q8CBC7;Q8JZY1	Putative tRNA (cytidine(32)/guanosine(34)-2'-O)-methyltransferase	Q8CBC7_MOUSE;Q8JZY1_MOUSE	Ftsj1	7346	5105	6772	5181	7456	4251		6407.67	5629.33			Rickettsial homolog, mito protein domain, coexpression				8	8	9	8	8	8
	Q9DBE9	pre-rRNA 2'-O-ribose RNA methyltransferase FTSJ3	SPB1_MOUSE	Ftsj3	16775	16058	17262	13895	17722	16317		16698.3	15978			Rickettsial homolog, mito protein domain				31	32	32	32	31	32
	Q91WJ8	Far upstream element-binding protein 1	FUBP1_MOUSE	Fubp1	129568	140673	138166	124796	134051	123873		136136	127573			mito protein domain				31	30	30	30	30	31
	A2AJ72;Q3TIX6	Far upstream element (FUSE)-binding protein 3	A2AJ72_MOUSE;Q3TIX6_MOUSE	Fubp3	16123	14395	14577	9945	9613	8389		15031.7	9315.67							17	17	17	16	16	16
	Q99LJ1	Tissue alpha-L-fucosidase	FUCO_MOUSE	Fuca1	4847	4559	4335	4048	3510	4004		4580.33	3854			MS/MS				4	4	4	4	4	4
	Q99KR8	Plasma alpha-L-fucosidase	FUCO2_MOUSE	Fuca2	1345	1191	1106	884	680	973		1214	845.667							6	6	6	6	5	6
	Q9D6K8	FUN14 domain-containing protein 2	FUND2_MOUSE	Fundc2	21863	19703	19369	14656	21646	17256		20311.7	17852.7		MitoCarta3.0	mito protein domain+, MS/MS++	MOM	Mitochondrial dynamics and surveillance > Organelle contact sites | Signaling		7	8	7	7	7	7
	P23188	Furin	FURIN_MOUSE	Furin	135	139	154	79	121	0		142.667	66.6667							1	4	2	1	2	Filtered
	P56959	RNA-binding protein FUS	FUS_MOUSE	Fus	166665	171564	171467	161392	181286	168039		169899	170239			mito protein domain				11	11	11	11	10	11
	Q9WTS2	Alpha-(1,6)-fucosyltransferase	FUT8_MOUSE	Fut8	2615	2336	2697	1657	2683	2338		2549.33	2226			mito protein domain				11	11	11	10	10	11
	O35943	Frataxin, mitochondrial	FRDA_MOUSE	Fxn	4918	4628	5203	4028	5974	4514		4916.33	4838.67		MitoCarta3.0	literature, APEX_matrix, targetP signal+, yeast mito homolog++, Rickettsial homolog, mito protein domain, coexpression, MS/MS+	Matrix	Metabolism > Metals and cofactors > Fe-S cluster biosynthesis		3	2	3	2	3	2
	Q61584;Q61584-3;Q61584-4	Fragile X mental retardation syndrome-related protein 1;Isoform B of Fragile X mental retardation syndrome-related protein 1;Isoform C of Fragile X mental retardation syndrome-related protein 1	FXR1_MOUSE	Fxr1	28898	25215	25075	19311	23434	23369		26396	22038			mito protein domain				28	29	28	29	26	29
	Q9WVR4	Fragile X mental retardation syndrome-related protein 2	FXR2_MOUSE	Fxr2	2440	2466	2506	2026	2379	2344		2470.67	2249.67							9	9	10	10	9	10
	P97808	FXYD domain-containing ion transport regulator 5	FXYD5_MOUSE	Fxyd5	11609	13434	14078	9317	18345	12088		13040.3	13250							7	7	7	7	7	7
	O35601	FYN-binding protein 1	FYB1_MOUSE	Fyb1	28508	28103	30637	24081	24602	24609		29082.7	24430.7			mito protein domain				31	31	29	30	30	30
	Q8VDC1	FYVE and coiled-coil domain-containing protein 1	FYCO1_MOUSE	Fyco1	174	156	138	124	89	150		156	121			coexpression				3	3	2	2	2	3
	P39688-2	Isoform 2 of Tyrosine-protein kinase Fyn	FYN_MOUSE	Fyn	35845	36135	34933	27104	30706	32315		35637.7	30041.7			mito protein domain				23	24	22	22	22	23
	Q91Z49;Q91Z49-2	UAP56-interacting factor;Isoform 2 of UAP56-interacting factor	UIF_MOUSE	Fyttd1	2054	1722	1815	1920	2149	1809		1863.67	1959.33			targetP signal				3	3	2	3	3	2
	P97855	Ras GTPase-activating protein-binding protein 1	G3BP1_MOUSE	G3bp1	195460	175366	187344	128245	182257	169173		186057	159892			mito protein domain				22	23	23	22	22	23
	P97379	Ras GTPase-activating protein-binding protein 2	G3BP2_MOUSE	G3bp2	38334	37181	37231	25205	37525	34380		37582	32370			mito protein domain				16	16	16	16	16	16
	Q6NSQ9	Glucose-6-phosphatase 3	G6PC3_MOUSE	G6pc3	1397	1328	1134	2749	1584	2086		1286.33	2139.67							3	2	2	3	3	3
	Q00612	Glucose-6-phosphate 1-dehydrogenase X	G6PD1_MOUSE	G6pdx	73678	74726	74256	60174	58797	63734		74220	60901.7			MS/MS				32	32	32	32	32	32
	P70699	Lysosomal alpha-glucosidase	LYAG_MOUSE	Gaa	4287	3529	3151	2309	3975	3722		3655.67	3335.33			yeast mito homolog, MS/MS				13	14	14	13	14	14
	Q9DCD6	Gamma-aminobutyric acid receptor-associated protein	GBRAP_MOUSE	Gabarap	32201	29293	30865	16995	29848	27580		30786.3	24807.7							3	3	3	2	3	3
	P60521	Gamma-aminobutyric acid receptor-associated protein-like 2	GBRL2_MOUSE	Gabarapl2	49087	49166	47834	27083	45117	41610		48695.7	37936.7			MS/MS				5	5	5	5	5	5
	Q00422	GA-binding protein alpha chain	GABPA_MOUSE	Gabpa	28056	27350	25755	23665	24337	25315		27053.7	24439							15	15	15	15	15	15
	Q00420;Q00420-3	GA-binding protein subunit beta-1;Isoform 3 of GA-binding protein subunit beta-1	GABP1_MOUSE	Gabpb1	47477	50226	35701	36843	32289	30104		44468	33078.7			Rickettsial homolog, mito protein domain				4	3	4	4	4	3
	P81069	GA-binding protein subunit beta-2	GABP2_MOUSE	Gabpb2	7075	6712	6374	5904	6285	6100		6720.33	6096.33			Rickettsial homolog, mito protein domain				9	9	9	9	8	9
	Q9CR59	Growth arrest and DNA damage-inducible proteins-interacting protein 1	G45IP_MOUSE	Gadd45gip1	6147	6216	8536	6875	6519	7319		6966.33	6904.33		MitoCarta3.0	APEX_matrix, GFP, targetP signal+, coexpression+, MS/MS++	Matrix	Mitochondrial central dogma > Translation > Mitochondrial ribosome		5	6	6	6	4	6
	Q99KY4;Q99KY4-2	Cyclin-G-associated kinase;Isoform 2 of Cyclin-G-associated kinase	GAK_MOUSE	Gak	12517	13111	11935	9267	11852	11865		12521	10994.7			mito protein domain				39	40	39	39	40	40
	Q8R059	UDP-glucose 4-epimerase	GALE_MOUSE	Gale	12422	13047	11790	9392	11090	10395		12419.7	10292.3			mito protein domain				13	13	13	13	13	13
	Q9R0N0	Galactokinase	GALK1_MOUSE	Galk1	123890	107121	120778	97288	117359	115552		117263	110066			mito protein domain, coexpression				17	18	18	18	18	18
	Q68FH4	N-acetylgalactosamine kinase	GALK2_MOUSE	Galk2	13713	12644	12801	10810	10597	11956		13052.7	11121			mito protein domain				15	15	15	14	13	14
	Q571E4	N-acetylgalactosamine-6-sulfatase	GALNS_MOUSE	Galns	8258	9243	8021	6809	6834	6756		8507.33	6799.67							10	10	10	10	10	10
	O08912	Polypeptide N-acetylgalactosaminyltransferase 1	GALT1_MOUSE	Galnt1	7169	7191	6372	5090	6551	6158		6910.67	5933							15	15	14	15	14	15
	Q8BGT9	Polypeptide N-acetylgalactosaminyltransferase 12	GLT12_MOUSE	Galnt12	1511	1637	1514	1181	1345	1425		1554	1317							5	4	4	4	4	4
	Q6PB93	Polypeptide N-acetylgalactosaminyltransferase 2	GALT2_MOUSE	Galnt2	9692	8907	8420	5190	7611	7621		9006.33	6807.33							16	16	16	16	15	16
	P70419	Polypeptide N-acetylgalactosaminyltransferase 3	GALT3_MOUSE	Galnt3	1112	770	712	443	592	475		864.667	503.333							8	8	8	7	6	7
	Q8C7U7	Polypeptide N-acetylgalactosaminyltransferase 6	GALT6_MOUSE	Galnt6	2207	2388	2579	1090	1798	1987		2391.33	1625							10	11	11	10	10	10
	Q80VA0	N-acetylgalactosaminyltransferase 7	GALT7_MOUSE	Galnt7	11865	11735	12111	8912	11472	10745		11903.7	10376.3							25	25	25	25	25	25
	Q03249	Galactose-1-phosphate uridylyltransferase	GALT_MOUSE	Galt	2948	2515	2440	2000	2309	2261		2634.33	2190							7	7	7	7	7	7
	Q8CA72	Gigaxonin	GAN_MOUSE	Gan	687	560	447	387	531	567		564.667	495							5	5	5	5	4	6
	Q8BHN3	Neutral alpha-glucosidase AB	GANAB_MOUSE	Ganab	112754	114818	109376	88060	95881	96461		112316	93467.3			yeast mito homolog				53	52	52	50	52	51
	P16858	Glyceraldehyde-3-phosphate dehydrogenase	G3P_MOUSE	Gapdh	10200445	9383886	10258924	7228249	9080197	9056336		9.94775e+06	8.45493e+06		mito-interacting	targetP signal, yeast mito homolog, Rickettsial homolog				34	33	31	33	29	31
	Q6PAR5	GTPase-activating protein and VPS9 domain-containing protein 1	GAPD1_MOUSE	Gapvd1	20538	15210	23298	12406	14969	14631		19682	14002							40	40	40	38	39	41
	Q9CY66;Q9CY66-2;Q9CY66-3	H/ACA ribonucleoprotein complex subunit 1;Isoform 2 of H/ACA ribonucleoprotein complex subunit 1;Isoform 3 of H/ACA ribonucleoprotein complex subunit 1	GAR1_MOUSE	Gar1	84399	80944	80887	88753	80019	80072		82076.7	82948							8	8	8	8	8	8
	Q9CZD3	Glycine--tRNA ligase	GARS_MOUSE	Gars1	139785	128209	137877	95636	120370	120143		135290	112050		MitoCarta3.0	targetP signal+, yeast mito homolog, mito protein domain, induction	Matrix	Mitochondrial central dogma > Translation > mt-tRNA synthetases		44	41	41	44	39	42
	Q64737	Trifunctional purine biosynthetic protein adenosine-3	PUR2_MOUSE	Gart	119756	112596	119166	85864	107544	105352		117173	99586.7			mito protein domain				53	56	52	55	52	53
	P23772	Trans-acting T-cell-specific transcription factor GATA-3	GATA3_MOUSE	Gata3	475	460	474	307	427	410		469.667	381.333			induction				3	3	3	3	3	3
	Q920S3	GATA zinc finger domain-containing protein 1	GATD1_MOUSE	Gatad1	1521	1496	1467	1400	1456	1380		1494.67	1412			coexpression				3	3	3	3	3	3
	Q8CHY6	Transcriptional repressor p66 alpha	P66A_MOUSE	Gatad2a	33771	42821	42943	34347	35483	35977		39845	35269							28	28	27	28	27	28
	Q8VHR5	Transcriptional repressor p66-beta	P66B_MOUSE	Gatad2b	24492	26821	26311	24301	25321	24035		25874.7	24552.3							21	22	22	22	22	22
	Q8BFQ8	Glutamine amidotransferase-like class 1 domain-containing protein 1	GALD1_MOUSE	Gatd1	16505	16329	16396	12469	14528	14736		16410	13911			mito protein domain				4	4	4	4	4	4
	Q9D172	Glutamine amidotransferase-like class 1 domain-containing protein 3A, mitochondrial	GAL3A_MOUSE	Gatd3a	43776	48106	43662	41088	41942	42123		45181.3	41717.7		MitoCarta3.0	APEX_matrix, targetP signal+, mito protein domain, induction, coexpression++, MS/MS++	Matrix			11	10	10	11	10	12
	P17439	Lysosomal acid glucosylceramidase	GLCM_MOUSE	Gba	8027	8540	7710	6649	6289	6731		8092.33	6556.33			MS/MS				11	11	11	11	11	11
	Q69ZF3	Non-lysosomal glucosylceramidase	GBA2_MOUSE	Gba2	746	676	645	481	611	627		689	573							5	5	5	5	5	5
	Q9D6Y9	1,4-alpha-glucan-branching enzyme	GLGB_MOUSE	Gbe1	2464	2575	2950	2334	2605	2530		2663	2489.67			mito protein domain, coexpression				12	11	12	12	12	12
	Q6A099;Q6DFZ1	MKIAA0248 protein (Fragment);Golgi-specific brefeldin A-resistance factor 1	Q6A099_MOUSE;Q6DFZ1_MOUSE	Gbf1	6777	6130	6020	4548	5243	4978		6309	4923							43	42	42	43	41	42
	Q9Z0E6	Guanylate-binding protein 2	GBP2_MOUSE	Gbp2	44667	44786	37877	25552	32861	31460		42443.3	29957.7							28	31	28	30	29	29
	Q61107	Guanylate-binding protein 4	GBP4_MOUSE	Gbp4	36331	31901	31303	17143	28914	25744		33178.3	23933.7							30	29	29	26	29	28
	Q8CFB4	Guanylate-binding protein 5	GBP5_MOUSE	Gbp5	5664	5107	4648	4556	4862	4538		5139.67	4652							12	13	11	12	11	12
	A0A0G2JDV3	Guanylate-binding protein 6	A0A0G2JDV3_MOUSE	Gbp6	34757	33154	28122	16934	26848	22591		32011	22124.3							32	32	32	32	31	32
	Q91Z40	Gbp6 protein	Q91Z40_MOUSE	Gbp7	85277	71059	75214	48798	68674	55892		77183.3	57788							39	39	38	39	38	37
	O88986	2-amino-3-ketobutyrate coenzyme A ligase, mitochondrial	KBL_MOUSE	Gcat	20081	16832	16104	10469	14088	12881		17672.3	12479.3		MitoCarta3.0	literature, targetP signal, yeast mito homolog+, Rickettsial homolog, mito protein domain, MS/MS++	unknown	Metabolism > Amino acid metabolism > Glycine metabolism		14	15	14	14	14	15
	Q9D4H2	GRIP and coiled-coil domain-containing protein 1	GCC1_MOUSE	Gcc1	284	239	288	182	243	226		270.333	217							3	3	3	2	3	3
	Q8CHG3	GRIP and coiled-coil domain-containing protein 2	GCC2_MOUSE	Gcc2	932	894	865	583	1015	819		897	805.667							17	17	17	18	17	17
	Q60759	Glutaryl-CoA dehydrogenase, mitochondrial	GCDH_MOUSE	Gcdh	6067	5735	4777	5252	4908	5064		5526.33	5074.67		MitoCarta3.0	literature, APEX_matrix, targetP signal+, mito protein domain+, coexpression, MS/MS++	Matrix	Metabolism > Amino acid metabolism > Lysine metabolism		10	10	10	10	10	10
	Q8BKT3	GC-rich sequence DNA-binding factor 2	GCFC2_MOUSE	Gcfc2	1688	1549	1562	1313	1614	1419		1599.67	1448.67							9	9	9	9	9	9
	P97494	Glutamate--cysteine ligase catalytic subunit	GSH1_MOUSE	Gclc	6677	6046	6354	5392	6305	5871		6359	5856			coexpression				12	12	12	12	12	12
	O09172	Glutamate--cysteine ligase regulatory subunit	GSH0_MOUSE	Gclm	56376	58353	59425	50236	54098	54242		58051.3	52858.7			targetP signal, coexpression				8	9	10	9	9	9
	E9PVA8	eIF-2-alpha kinase activator GCN1	GCN1_MOUSE	Gcn1	24933	25055	24393	20412	22280	21646		24793.7	21446			yeast mito homolog				130	130	130	130	129	131
	Q91WK5	Glycine cleavage system H protein, mitochondrial	GCSH_MOUSE	Gcsh	2188	2115	1783	1634	1933	1774		2028.67	1780.33		MitoCarta3.0	literature, APEX_matrix, targetP signal+, yeast mito homolog, mito protein domain+, MS/MS	Matrix	Metabolism > Lipid metabolism > Lipoate insertion | Metabolism > Amino acid metabolism > Glycine metabolism | Metabolism > Amino acid metabolism > Glycine cleavage system		2	2	2	2	2	2
	Q9JL56	Glycerophosphodiester phosphodiesterase 1	GDE1_MOUSE	Gde1	1669	1796	1639	1424	1491	1443		1701.33	1452.67			yeast mito homolog, mito protein domain				4	4	3	4	4	4
	P50396	Rab GDP dissociation inhibitor alpha	GDIA_MOUSE	Gdi1	16936	15593	15647	14100	11257	13803		16058.7	13053.3							16	15	16	16	13	14
	Q61598	Rab GDP dissociation inhibitor beta	GDIB_MOUSE	Gdi2	582632	548810	563081	427523	505932	504838		564841	479431							49	49	47	48	47	48
	Q3TLS3	GDP-D-glucose phosphorylase 1	GDPP1_MOUSE	Gdpgp1	1191	1072	1097	739	923	866		1120	842.667							4	4	4	4	4	4
	P55041	GTP-binding protein GEM	GEM_MOUSE	Gem	2459	2496	3977	2112	2660	2342		2977.33	2371.33			mito protein domain				2	2	4	2	2	2
	Q9CQQ4	Gem-associated protein 2	GEMI2_MOUSE	Gemin2	7669	6624	6890	5120	6729	6364		7061	6071			coexpression				8	7	7	7	7	7
	Q6P6L6	Gem (Nuclear organelle) associated protein 4	Q6P6L6_MOUSE	Gemin4	4889	4443	4404	3607	4419	4380		4578.67	4135.33							22	23	24	21	23	23
	Q8BX17	Gem-associated protein 5	GEMI5_MOUSE	Gemin5	13747	12229	12208	10147	12462	12547		12728	11718.7			targetP signal, mito protein domain, coexpression				47	47	46	47	48	47
	Q9CX53	Gem-associated protein 6	GEMI6_MOUSE	Gemin6	2688	985	4065	1824	2578	2326		2579.33	2242.67							2	1	2	2	2	2
	Q9CWY4	Gem-associated protein 7	GEMI7_MOUSE	Gemin7	2134	3820	4030	1345	3617	1281		3328	2081			induction, coexpression				2	2	2	2	2	2
	Q8BMI4	Flap endonuclease GEN homolog 1	GEN_MOUSE	Gen1	950	805	814	463	818	745		856.333	675.333			mito protein domain, coexpression				7	8	8	6	7	7
	Q8K0D7	Guided entry of tail-anchored proteins factor 1	GET1_MOUSE	Get1	1845	762	1155	548	8548	1058		1254	3384.67			yeast mito homolog				2	2	2	1	2	2
	O54984	ATPase GET3	GET3_MOUSE	Get3	45502	42570	40520	32799	36383	36431		42864	35204.3			coexpression				14	14	13	14	14	14
	Q9D1H7	Golgi to ER traffic protein 4 homolog	GET4_MOUSE	Get4	17580	15939	14638	12667	16337	15307		16052.3	14770.3							12	12	11	11	12	12
	P03995;P03995-2	Glial fibrillary acidic protein;Isoform 2 of Glial fibrillary acidic protein	GFAP_MOUSE	Gfap	961	549	430	312	901	410		646.667	541			targetP signal				2	2	2	2	2	2
	P56213	FAD-linked sulfhydryl oxidase ALR	ALR_MOUSE	Gfer	2491	2293	2286	2068	2262	1763		2356.67	2031		MitoCarta3.0	literature, GFP, targetP signal, yeast mito homolog++, mito protein domain, coexpression, MS/MS	IMS	Protein import, sorting and homeostasis > Protein import and sorting > MIA40		3	3	3	3	3	3
	Q8K0D5	Elongation factor G, mitochondrial	EFGM_MOUSE	Gfm1	39899	34001	21019	16849	20031	19453		31639.7	18777.7		MitoCarta3.0	literature, APEX_matrix, targetP signal, yeast mito homolog++, Rickettsial homolog, mito protein domain, induction, coexpression++, MS/MS++	Matrix	Mitochondrial central dogma > Translation > Translation factors		31	32	31	32	31	32
	Q8R2Q4;Q8R2Q4-2;Q8R2Q4-3	Ribosome-releasing factor 2, mitochondrial;Isoform 2 of Ribosome-releasing factor 2, mitochondrial;Isoform 3 of Ribosome-releasing factor 2, mitochondrial	RRF2M_MOUSE	Gfm2	4382	4223	4313	3586	3053	3459		4306	3366		MitoCarta3.0	literature, APEX_matrix, targetP signal, yeast mito homolog++, Rickettsial homolog, mito protein domain, coexpression++, MS/MS++	Matrix	Mitochondrial central dogma > Translation > Translation factors		14	13	14	14	14	14
	P47856;P47856-2	Glutamine--fructose-6-phosphate aminotransferase [isomerizing] 1;Isoform 2 of Glutamine--fructose-6-phosphate aminotransferase [isomerizing] 1	GFPT1_MOUSE	Gfpt1	26206	25670	25082	15770	22939	21739		25652.7	20149.3			Rickettsial homolog, mito protein domain				33	33	34	33	33	32
	Q8R0H9	ADP-ribosylation factor-binding protein GGA1	GGA1_MOUSE	Gga1	9534	8606	8600	6483	8688	7009		8913.33	7393.33							12	12	11	11	12	12
	Q8BMI3	ADP-ribosylation factor-binding protein GGA3	GGA3_MOUSE	Gga3	985	854	760	726	1020	874		866.333	873.333							6	6	5	6	6	6
	Q923B0	Gamma-glutamylaminecyclotransferase	GGACT_MOUSE	Ggact	7975	7211	6321	6433	6412	5868		7169	6237.67			targetP signal, coexpression				5	5	5	5	5	4
	Q9D7X8	Gamma-glutamylcyclotransferase	GGCT_MOUSE	Ggct	34318	34780	35632	25060	31121	32437		34910	29539.3							8	8	8	8	8	8
	Q9Z0L8;Q9Z0L8-2	Gamma-glutamyl hydrolase;Isoform II of Gamma-glutamyl hydrolase	GGH_MOUSE	Ggh	16430	15938	15206	12479	11901	12190		15858	12190			mito protein domain, MS/MS				8	8	8	8	8	8
	Q5SV77;Q5SV77-2;Q5SV77-3;Q5SV77-4	Gametogenetin-binding protein 2;Isoform 2 of Gametogenetin-binding protein 2;Isoform 3 of Gametogenetin-binding protein 2;Isoform 4 of Gametogenetin-binding protein 2	GGNB2_MOUSE	Ggnbp2	539	547	508	386	608	518		531.333	504							3	3	3	3	3	3
	Q9WTN0	Geranylgeranyl pyrophosphate synthase	GGPPS_MOUSE	Ggps1	2422	2342	2292	1999	2213	2114		2352	2108.67			yeast mito homolog, Rickettsial homolog, mito protein domain				3	3	3	3	3	3
	Q60928	Glutathione hydrolase 1 proenzyme	GGT1_MOUSE	Ggt1	3427	3373	3223	1289	2266	3014		3341	2189.67							7	7	7	6	7	7
	P23336;P23336-2;P23336-3	N-acetyllactosaminide alpha-1,3-galactosyltransferase;Isoform 2 of N-acetyllactosaminide alpha-1,3-galactosyltransferase;Isoform 3 of N-acetyllactosaminide alpha-1,3-galactosyltransferase	GGTA1_MOUSE	Ggta1	1070	604	1270	39	1399	1227		981.333	888.333							2	2	2	1	2	2
	Q91VC9	Growth hormone-inducible transmembrane protein	GHITM_MOUSE	Ghitm	10310	12996	11596	11976	10366	10841		11634	11061		MitoCarta3.0	literature, APEX_IMS, targetP signal+, Rickettsial homolog, mito protein domain+, induction, coexpression++, MS/MS	MIM	Mitochondrial dynamics and surveillance > Apoptosis		4	5	5	5	4	5
	Q9D7M1	Glucose-induced degradation protein 8 homolog	GID8_MOUSE	Gid8	8955	8588	5447	4973	5788	4570		7663.33	5110.33			induction				10	10	10	10	10	10
	Q99MR1	GRB10-interacting GYF protein 1	GGYF1_MOUSE	Gigyf1	207	218	204	206	208	170		209.667	194.667			mito protein domain				3	3	3	3	3	3
	Q6Y7W8	GRB10-interacting GYF protein 2	GGYF2_MOUSE	Gigyf2	6890	6735	6791	5096	5498	5602		6805.33	5398.67			mito protein domain				28	28	28	28	26	28
	P70224	GTPase IMAP family member 1	GIMA1_MOUSE	Gimap1	22996	23150	20727	18432	19216	19815		22291	19154.3			mito protein domain				12	12	12	13	13	12
	Q99MI6	GTPase IMAP family member 3	GIMA3_MOUSE	Gimap3	6264	6575	5648	4669	5559	5269		6162.33	5165.67			mito protein domain				6	6	6	6	6	6
	Q99JY3	GTPase IMAP family member 4	GIMA4_MOUSE	Gimap4	1276667	1362098	1261430	1076113	1094529	1110171		1300065	1.0936e+06			mito protein domain				28	28	28	31	27	28
	Q8BWF2	GTPase IMAP family member 5	GIMA5_MOUSE	Gimap5	30538	31823	28641	26212	26856	26744		30334	26604			mito protein domain				12	12	12	12	12	12
	Q8K349	GTPase IMAP family member 6	GIMA6_MOUSE	Gimap6	3044	3052	3464	1974	3079	3022		3186.67	2691.67			mito protein domain				7	7	6	7	6	7
	Q8R379	GTPase, IMAP family member 7	Q8R379_MOUSE	Gimap7	391180	372060	340347	235384	303811	302986		367862	280727			Rickettsial homolog, mito protein domain				26	25	24	24	23	24
	Q75N62	GTPase IMAP family member 8	GIMA8_MOUSE	Gimap8	14988	15553	14603	10873	13003	12605		15048	12160.3			mito protein domain				35	35	33	31	32	33
	G3X987	GTPase IMAP family member 9	GIMA9_MOUSE	Gimap9	95288	92016	91253	76866	89335	91561		92852.3	85920.7			mito protein domain				20	20	20	19	18	19
	Q9CZ15	DNA replication complex GINS protein PSF1	PSF1_MOUSE	Gins1	14134	13983	13587	12813	14959	13614		13901.3	13795.3							5	5	5	5	5	5
	Q9D600	DNA replication complex GINS protein PSF2	PSF2_MOUSE	Gins2	3058	2393	2134	2290	3024	2675		2528.33	2663							3	2	2	2	2	3
	Q9CY94	DNA replication complex GINS protein PSF3	PSF3_MOUSE	Gins3	59417	35576	23420	26013	41068	37724		39471	34935							11	11	11	11	11	11
	Q99LZ3	DNA replication complex GINS protein SLD5	SLD5_MOUSE	Gins4	12622	13705	13439	12394	11581	11436		13255.3	11803.7							10	10	10	10	9	10
	Q9Z0G0	PDZ domain-containing protein GIPC1	GIPC1_MOUSE	Gipc1	6064	4741	4085	3749	5047	4823		4963.33	4539.67			mito protein domain				9	8	7	9	8	8
	Q68FF6	ARF GTPase-activating protein GIT1	GIT1_MOUSE	Git1	2960	2957	2951	2367	2857	2791		2956	2671.67			Rickettsial homolog, mito protein domain				13	14	13	13	13	13
	Q9JLQ2	ARF GTPase-activating protein GIT2	GIT2_MOUSE	Git2	25551	22371	22730	18190	20014	20401		23550.7	19535			mito protein domain				28	29	29	28	28	28
	Q64516;Q64516-1;Q64516-2	Glycerol kinase;Isoform 1 of Glycerol kinase;Isoform 2 of Glycerol kinase	GLPK_MOUSE	Gk	5158	4585	4549	3782	4497	4244		4764	4174.33		mito-interacting	literature, yeast mito homolog+, mito protein domain, induction, coexpression, MS/MS++				12	12	12	12	12	12
	P51569	Alpha-galactosidase A	AGAL_MOUSE	Gla	3765	3374	3525	2573	3547	3492		3554.67	3204							7	7	7	5	7	7
	P23780	Beta-galactosidase	BGAL_MOUSE	Glb1	11925	10586	10328	10174	10035	9368		10946.3	9859			MS/MS				16	15	15	15	15	15
	Q8R322	Nucleoporin GLE1	GLE1_MOUSE	Gle1	2036	1975	1946	1885	1913	1844		1985.67	1880.67			yeast mito homolog				8	8	8	8	8	8
	Q61543	Golgi apparatus protein 1	GSLG1_MOUSE	Glg1	17057	14709	14896	10117	14064	13490		15554	12557							46	46	47	49	45	46
	Q9CWG1	Glioma pathogenesis-related protein 1	GLIP1_MOUSE	Glipr1	2828	2888	2784	1796	1696	2254		2833.33	1915.33							4	4	4	4	3	4
	Q9CYL5	Golgi-associated plant pathogenesis-related protein 1	GAPR1_MOUSE	Glipr2	314531	324005	309685	255236	293050	300440		316074	282909							9	9	9	9	9	9
	Q8BZM1	Glomulin	GLMN_MOUSE	Glmn	7950	7688	7290	5716	6232	6434		7642.67	6127.33							18	19	19	18	19	19
	Q9JHJ3	Glycosylated lysosomal membrane protein	GLMP_MOUSE	Glmp	2654	2264	2254	1443	2394	2113		2390.67	1983.33							2	2	2	2	2	2
	Q9CPU0	Lactoylglutathione lyase	LGUL_MOUSE	Glo1	82569	79975	74968	195919	137496	144135		79170.7	159183			coexpression				14	15	14	15	15	15
	Q9CPV4	Glyoxalase domain-containing protein 4	GLOD4_MOUSE	Glod4	131929	129949	133812	114237	133896	133133		131897	127089		MitoCarta3.0	APEX_matrix, targetP signal, coexpression, MS/MS++	Matrix			23	23	23	23	23	23
	Q9QUH0	Glutaredoxin-1	GLRX1_MOUSE	Glrx	193826	184799	184304	91761	150599	133870		187643	125410			yeast mito homolog, Rickettsial homolog, mito protein domain				8	8	9	8	8	9
	Q923X4;Q923X4-2	Glutaredoxin-2, mitochondrial;Isoform 2 of Glutaredoxin-2, mitochondrial	GLRX2_MOUSE	Glrx2	1775	1909	1311	1432	1556	1576		1665	1521.33		MitoCarta3.0	literature, targetP signal+, yeast mito homolog, Rickettsial homolog, mito protein domain, coexpression, MS/MS	Matrix	Metabolism > Metals and cofactors > Fe-S-containing proteins | Metabolism > Vitamin metabolism > Vitamin C metabolism | Metabolism > Detoxification > ROS and glutathione metabolism		3	3	2	3	3	3
	Q9CQM9	Glutaredoxin-3	GLRX3_MOUSE	Glrx3	117697	118942	124075	88711	119613	105034		120238	104453			Rickettsial homolog, mito protein domain, induction, coexpression				22	21	22	22	21	21
	Q80Y14	Glutaredoxin-related protein 5, mitochondrial	GLRX5_MOUSE	Glrx5	11200	11469	10459	9821	12330	10671		11042.7	10940.7		MitoCarta3.0	literature, APEX_matrix, targetP signal+, yeast mito homolog+, Rickettsial homolog, mito protein domain, coexpression, MS/MS+	Matrix	Metabolism > Metals and cofactors > Fe-S cluster biosynthesis | Metabolism > Metals and cofactors > Fe-S-containing proteins		4	4	4	4	4	4
	D3Z7P3	Glutaminase kidney isoform, mitochondrial	GLSK_MOUSE	Gls	43247	42298	40433	39893	39818	39860		41992.7	39857		MitoCarta3.0	literature, APEX_matrix, targetP signal+, mito protein domain+, MS/MS++	MIM	Metabolism > Amino acid metabolism > Glutamate metabolism		30	29	28	28	27	28
	D3Z7P3-2	Isoform 2 of Glutaminase kidney isoform, mitochondrial	GLSK_MOUSE	Gls	8006	7708	7896	7295	8277	7724		7870	7765.33		MitoCarta3.0	literature, APEX_matrix, targetP signal+, mito protein domain+, MS/MS++	MIM	Metabolism > Amino acid metabolism > Glutamate metabolism		4	4	4	4	4	4
	Q9JL62	Glycolipid transfer protein	GLTP_MOUSE	Gltp	66494	63218	61261	49128	59910	58279		63657.7	55772.3							10	11	11	11	11	11
	P26443	Glutamate dehydrogenase 1, mitochondrial	DHE3_MOUSE	Glud1	186916	209145	193690	194356	181311	186546		196584	187404		MitoCarta3.0	literature, APEX_matrix, targetP signal, yeast mito homolog, Rickettsial homolog, mito protein domain, coexpression, MS/MS++	Matrix	Metabolism > Amino acid metabolism > Glutamate metabolism | Metabolism > Amino acid metabolism > GABA metabolism		30	30	30	31	30	30
	P15105	Glutamine synthetase	GLNA_MOUSE	Glul	3409	2587	2876	2084	2724	2680		2957.33	2496			Rickettsial homolog, mito protein domain				6	5	6	5	6	6
	Q922P9	Putative oxidoreductase GLYR1	GLYR1_MOUSE	Glyr1	30815	29701	27577	23482	28054	28131		29364.3	26555.7			mito protein domain				21	21	21	20	20	21
	Q60648	Ganglioside GM2 activator	SAP3_MOUSE	Gm2a	117400	118723	125550	93121	120905	104482		120558	106169			MS/MS+				6	6	6	7	6	6
	Q8K0C9	GDP-mannose 4,6 dehydratase	GMDS_MOUSE	Gmds	27000	29213	40971	19363	23501	38490		32394.7	27118			mito protein domain				16	16	16	15	16	16
	Q9JL60	Glucocorticoid modulatory element-binding protein 1	GMEB1_MOUSE	Gmeb1	3596	3234	3287	2881	6978	3355		3372.33	4404.67							6	6	6	6	6	6
	P58929	Glucocorticoid modulatory element-binding protein 2	GMEB2_MOUSE	Gmeb2	5033	4844	4481	4083	4267	3787		4786	4045.67							8	7	7	8	6	6
	Q9CQI3	Glia maturation factor beta	GMFB_MOUSE	Gmfb	194374	202149	208609	156346	171059	182624		201711	170010			MS/MS				9	9	10	9	9	9
	Q9ERL7	Glia maturation factor gamma	GMFG_MOUSE	Gmfg	215052	223998	222022	158734	190920	195210		220357	181621							8	9	9	9	9	8
	Q6PGG2	GEM-interacting protein	GMIP_MOUSE	Gmip	9893	10033	9841	7145	8417	8409		9922.33	7990.33			mito protein domain				28	29	28	27	28	28
	O88513	Geminin	GEMI_MOUSE	Gmnn	3017	3046	2876	2184	3050	2504		2979.67	2579.33			induction				3	3	3	3	3	3
	Q922H4	Mannose-1-phosphate guanyltransferase alpha	GMPPA_MOUSE	Gmppa	16319	15132	14704	11025	13787	14089		15385	12967			targetP signal, Rickettsial homolog, mito protein domain				13	13	13	13	12	13
	Q8BTZ7	Mannose-1-phosphate guanyltransferase beta	GMPPB_MOUSE	Gmppb	23584	24694	22871	18529	21088	19706		23716.3	19774.3			targetP signal, mito protein domain				13	13	13	12	13	13
	Q99L27	GMP reductase 2	GMPR2_MOUSE	Gmpr2	15983	15187	13086	14757	14943	14764		14752	14821.3			mito protein domain				9	9	8	10	10	9
	Q3THK7	GMP synthase [glutamine-hydrolyzing]	GUAA_MOUSE	Gmps	106662	102108	101346	81952	97618	94066		103372	91212			mito protein domain, induction				48	49	43	50	43	47
	P21278	Guanine nucleotide-binding protein subunit alpha-11	GNA11_MOUSE	Gna11	3916	4655	4822	4152	4036	4315		4464.33	4167.67			yeast mito homolog				5	5	5	6	5	6
	P27601	Guanine nucleotide-binding protein subunit alpha-13	GNA13_MOUSE	Gna13	38297	35049	35290	29253	34024	32257		36212	31844.7			yeast mito homolog				20	21	20	20	19	20
[truncated: 4,926 more rows]

## Sheet: fold change + q val
Day 6, IL15 expanded CD8 T cells, Proteomics
black text - proteins quantified by >=2 peptides in at least two bio reps of one condition, grey text - proteins quantified by fewer peptides than this					Pim dKO / WT			MitoCarta3.0_Annotation
	Protein_Group_IDs (uniprot)	Protein description	Protein names	Gene names	log2(fold-change)	q value		MitoCarta 3.0 List	Evidence	SubMitoLocalization	MitoPathways
	Q6GQT1	Alpha-2-macroglobulin-P	A2MG_MOUSE	A2m	-0.162532	0.162652			MS/MS
	P58742	Aladin	AAAS_MOUSE	Aaas	-0.12949	0.0888691			mito protein domain
	Q9D2R0	Acetoacetyl-CoA synthetase	AACS_MOUSE	Aacs	-0.293652	0.0647347			mito protein domain, coexpression
	Q8R2R3	Alpha- and gamma-adaptin-binding protein p34	AAGAB_MOUSE	Aagab	-0.255482	0.10098
	Q3UHJ0	AP2-associated protein kinase 1	AAK1_MOUSE	Aak1	-0.265392	0.071274			mito protein domain, MS/MS
	Q8R0P4	Mth938 domain-containing protein	AAMDC_MOUSE	Aamdc	-0.0956558	0.103004			mito protein domain
	J3QN89;Q3TJ22	Angio-associated migratory protein	J3QN89_MOUSE;Q3TJ22_MOUSE	Aamp	-0.188783	0.0969425			mito protein domain
	Q9D2V5	Protein AAR2 homolog	AAR2_MOUSE	Aar2	-0.498643	0.18832
	Q8BGQ7	Alanine--tRNA ligase, cytoplasmic	SYAC_MOUSE	Aars1	-0.347729	0.0658874			yeast mito homolog, Rickettsial homolog, mito protein domain
	Q14CH7	Alanine--tRNA ligase, mitochondrial	SYAM_MOUSE	Aars2	1.60394	0.0828397		MitoCarta3.0	literature, APEX_matrix, targetP signal, yeast mito homolog, Rickettsial homolog, mito protein domain, MS/MS	Matrix	Mitochondrial central dogma > Translation > mt-tRNA synthetases
	Q3THG9	Alanyl-tRNA editing protein Aarsd1	AASD1_MOUSE	Aarsd1	-0.102549	0.143072			Rickettsial homolog, mito protein domain
	Q9CQF6	L-aminoadipate-semialdehyde dehydrogenase-phosphopantetheinyl transferase	ADPPT_MOUSE	Aasdhppt	-0.116526	0.113205			Rickettsial homolog, coexpression
	Q9JKX4	Protein AATF	AATF_MOUSE	Aatf	0.0223205	0.260227
	Q91V24	ATP-binding cassette sub-family A member 7	ABCA7_MOUSE	Abca7	-0.628174	0.135706			Rickettsial homolog, mito protein domain, induction
	Q9JI39	ATP-binding cassette sub-family B member 10, mitochondrial	ABCBA_MOUSE	Abcb10	-1.09845	0.0651187		MitoCarta3.0	literature, APEX_matrix, targetP signal+, yeast mito homolog+, Rickettsial homolog, mito protein domain, induction, coexpression, MS/MS+	MIM	Metabolism > Metals and cofactors > Heme synthesis and processing | Small molecule transport > ABC transporters
	P21447	ATP-dependent translocase ABCB1	MDR1A_MOUSE	Abcb1a	-0.32711	0.0980597			Rickettsial homolog, mito protein domain, MS/MS
	P06795	ATP-dependent translocase ABCB1	MDR1B_MOUSE	Abcb1b	-0.114676	0.146073			Rickettsial homolog, mito protein domain, coexpression
	Q61102	ATP-binding cassette sub-family B member 7, mitochondrial	ABCB7_MOUSE	Abcb7	-0.14632	0.116965		MitoCarta3.0	literature, APEX_matrix, targetP signal, yeast mito homolog+, Rickettsial homolog, mito protein domain, coexpression+, MS/MS+	MIM	Metabolism > Metals and cofactors > Heme synthesis and processing | Metabolism > Metals and cofactors > Fe-S cluster biosynthesis | Metabolism > Metals and cofactors > Molybdenum cofactor synthesis and proteins | Small molecule transport > ABC transporters
	Q9CXJ4	Mitochondrial potassium channel ATP-binding subunit	MITOS_MOUSE	Abcb8	-0.203414	0.0736813		MitoCarta3.0	literature, targetP signal, yeast mito homolog, Rickettsial homolog, mito protein domain, coexpression++, MS/MS++	MIM	Small molecule transport > ABC transporters
	Q9JJ59;Q9JJ59-2	ATP-binding cassette sub-family B member 9;Isoform 2 of ATP-binding cassette sub-family B member 9	ABCB9_MOUSE	Abcb9	-0.363878	0.20344			yeast mito homolog+, Rickettsial homolog, mito protein domain
	O35379	Multidrug resistance-associated protein 1	MRP1_MOUSE	Abcc1	-0.111154	0.243447			Rickettsial homolog, mito protein domain
	E9Q236;E9Q467	ATP-binding cassette, sub-family C (CFTR/MRP), member 4;ATP-binding cassette, sub-family C (CFTR/MRP), member 4	E9Q236_MOUSE;E9Q467_MOUSE	Abcc4	-0.189676	0.0923028			Rickettsial homolog, mito protein domain
	P48410	ATP-binding cassette sub-family D member 1	ABCD1_MOUSE	Abcd1	-0.030675	0.26789		MitoCarta3.0	targetP signal, Rickettsial homolog, mito protein domain, induction	Membrane	Small molecule transport > ABC transporters
	P55096	ATP-binding cassette sub-family D member 3	ABCD3_MOUSE	Abcd3	-0.151331	0.0799079		MitoCarta3.0	GFP, targetP signal, Rickettsial homolog, mito protein domain, induction, coexpression	Membrane	Small molecule transport > ABC transporters
	P61222	ATP-binding cassette sub-family E member 1	ABCE1_MOUSE	Abce1	-0.191747	0.106362			Rickettsial homolog, mito protein domain
	Q6P542	ATP-binding cassette sub-family F member 1	ABCF1_MOUSE	Abcf1	-0.24785	0.0692276			Rickettsial homolog, mito protein domain, coexpression
	Q99LE6	ATP-binding cassette sub-family F member 2	ABCF2_MOUSE	Abcf2	-0.314401	0.0651187			literature, Rickettsial homolog, mito protein domain
	Q8K268	ATP-binding cassette sub-family F member 3	ABCF3_MOUSE	Abcf3	-0.141875	0.10073			Rickettsial homolog, mito protein domain
	Q64343	ATP-binding cassette sub-family G member 1	ABCG1_MOUSE	Abcg1	0.147218	0.225154			Rickettsial homolog, mito protein domain
	Q99P81	ATP-binding cassette sub-family G member 3	ABCG3_MOUSE	Abcg3	-0.277243	0.0835263			Rickettsial homolog, mito protein domain
	Q6PE15	Mycophenolic acid acyl-glucuronide esterase, mitochondrial	ABHDA_MOUSE	Abhd10	-0.173505	0.0787764		MitoCarta3.0	literature, APEX_IMS, APEX_matrix, targetP signal+, Rickettsial homolog, mito protein domain, MS/MS++	Matrix	Metabolism > Detoxification > Xenobiotic metabolism
	Q8K4F5	Protein ABHD11	ABHDB_MOUSE	Abhd11	-0.375071	0.0653184		MitoCarta3.0	literature, APEX_matrix, targetP signal+, yeast mito homolog++, Rickettsial homolog, mito protein domain, coexpression+, MS/MS++	Matrix	Metabolism > Carbohydrate metabolism > TCA-associated
	Q99LR1	Lysophosphatidylserine lipase ABHD12	ABD12_MOUSE	Abhd12	-0.127026	0.108646			yeast mito homolog, Rickettsial homolog, mito protein domain
	Q80UX8	Protein ABHD13	ABHDD_MOUSE	Abhd13	-0.417129	0.0706709			yeast mito homolog, Rickettsial homolog, mito protein domain
	Q8VCR7	Protein ABHD14B	ABHEB_MOUSE	Abhd14b	-0.363777	0.0672542
	Q5F2F2	Protein ABHD15	ABH15_MOUSE	Abhd15	-0.27034	0.114633			yeast mito homolog
	Q9Z1Q2	Phosphatidylserine lipase ABHD16A	ABHGA_MOUSE	Abhd16a	-0.294121	0.0672542			yeast mito homolog, mito protein domain
	Q99JW1	Alpha/beta hydrolase domain-containing protein 17A	AB17A_MOUSE	Abhd17a	-1.03393	0.0662337			yeast mito homolog
	Q7M759	Alpha/beta hydrolase domain-containing protein 17B	AB17B_MOUSE	Abhd17b	0.138193	0.169429			yeast mito homolog
	Q9DBL9;Q9DBL9-2	1-acylglycerol-3-phosphate O-acyltransferase ABHD5;Isoform 2 of 1-acylglycerol-3-phosphate O-acyltransferase ABHD5	ABHD5_MOUSE	Abhd5	-0.39087	0.0651187			mito protein domain, induction, coexpression
	Q8R2Y0;Q8R2Y0-2	Monoacylglycerol lipase ABHD6;Isoform 2 of Monoacylglycerol lipase ABHD6	ABHD6_MOUSE	Abhd6	-0.407624	0.0782701			Rickettsial homolog, mito protein domain, MS/MS
	Q8CBW3;Q8CBW3-2;Q8CBW3-3;Q8CBW3-4	Abl interactor 1;Isoform 2 of Abl interactor 1;Isoform 3 of Abl interactor 1;Isoform 4 of Abl interactor 1	ABI1_MOUSE	Abi1	-0.203346	0.0732512			mito protein domain
	Q8BYZ1	ABI gene family member 3	ABI3_MOUSE	Abi3	-0.225054	0.0888734			mito protein domain
	Q80ZQ9	Protein Abitram	ABITM_MOUSE	Abitram	-0.122698	0.0929237			mito protein domain+
	Q8K4G5;Q8K4G5-2;Q8K4G5-3	Actin-binding LIM protein 1;Isoform 2 of Actin-binding LIM protein 1;Isoform 3 of Actin-binding LIM protein 1	ABLM1_MOUSE	Ablim1	-0.278103	0.0658874
	Q5SSL4;Q5SSL4-2	Active breakpoint cluster region-related protein;Isoform 2 of Active breakpoint cluster region-related protein	ABR_MOUSE	Abr	-0.362827	0.0647347			mito protein domain
	Q4KML4	Costars family protein ABRACL	ABRAL_MOUSE	Abracl	-0.30449	0.141277
	Q8BPZ8	BRCA1-A complex subunit Abraxas 1	ABRX1_MOUSE	Abraxas1	-0.324742	0.156869
	Q3TCJ1	BRISC complex subunit Abraxas 2	ABRX2_MOUSE	Abraxas2	-0.122492	0.108054
	Q9QYL7	Activator of basal transcription 1	ABT1_MOUSE	Abt1	-0.162425	0.0701322
	Q921H8	3-ketoacyl-CoA thiolase A, peroxisomal	THIKA_MOUSE	Acaa1a	-0.283719	0.0647347		MitoCarta3.0	targetP signal, yeast mito homolog+, Rickettsial homolog, mito protein domain, coexpression	Matrix	Metabolism > Lipid metabolism > Fatty acid oxidation
	Q8BWT1	3-ketoacyl-CoA thiolase, mitochondrial	THIM_MOUSE	Acaa2	-0.0448407	0.231865		MitoCarta3.0	literature, APEX_matrix, targetP signal, Rickettsial homolog, mito protein domain, induction, coexpression+, MS/MS++	Matrix	Metabolism > Carbohydrate metabolism > Ketone metabolism | Metabolism > Lipid metabolism > Fatty acid oxidation | Metabolism > Amino acid metabolism > Lysine metabolism
	Q5SWU9;Q5SWU9-2	Acetyl-CoA carboxylase 1;Isoform 2 of Acetyl-CoA carboxylase 1	ACACA_MOUSE	Acaca	-0.357325	0.0774407		MitoCarta3.0	yeast mito homolog, Rickettsial homolog, mito protein domain, coexpression	Matrix	Metabolism > Lipid metabolism > Type II fatty acid synthesis | Metabolism > Vitamin metabolism > Biotin utilizing proteins
	Q8K370	Acyl-CoA dehydrogenase family member 10	ACD10_MOUSE	Acad10	-0.195253	0.144966		MitoCarta3.0	APEX_matrix, targetP signal+, mito protein domain+, coexpression, MS/MS++	Matrix	Metabolism > Lipid metabolism > Fatty acid oxidation
	Q80XL6	Acyl-CoA dehydrogenase family member 11	ACD11_MOUSE	Acad11	-0.274482	0.0729657		MitoCarta3.0	mito protein domain+, induction, coexpression	MIM	Metabolism > Lipid metabolism > Fatty acid oxidation
	Q9D7B6	Isobutyryl-CoA dehydrogenase, mitochondrial	ACAD8_MOUSE	Acad8	-0.142261	0.180328		MitoCarta3.0	literature, APEX_matrix, targetP signal+, mito protein domain+, coexpression, MS/MS++	Matrix	Metabolism > Amino acid metabolism > Branched-chain amino acid metabolism
	Q8JZN5	Complex I assembly factor ACAD9, mitochondrial	ACAD9_MOUSE	Acad9	-0.144881	0.0883578		MitoCarta3.0	literature, APEX_matrix, targetP signal+, mito protein domain+, MS/MS++	MIM	OXPHOS > Complex I > CI assembly factors | OXPHOS > OXPHOS assembly factors
	P51174	Long-chain specific acyl-CoA dehydrogenase, mitochondrial	ACADL_MOUSE	Acadl	-0.196343	0.0676317		MitoCarta3.0	literature, targetP signal+, mito protein domain+, induction, coexpression+, MS/MS++	MIM	Metabolism > Lipid metabolism > Fatty acid oxidation
	P45952	Medium-chain specific acyl-CoA dehydrogenase, mitochondrial	ACADM_MOUSE	Acadm	-0.129645	0.08471		MitoCarta3.0	literature, APEX_matrix, targetP signal, mito protein domain+, induction, coexpression++, MS/MS++	Matrix	Metabolism > Lipid metabolism > Fatty acid oxidation
	Q07417	Short-chain specific acyl-CoA dehydrogenase, mitochondrial	ACADS_MOUSE	Acads	-0.113607	0.194688		MitoCarta3.0	literature, APEX_matrix, targetP signal+, mito protein domain+, induction, coexpression++, MS/MS++	Matrix	Metabolism > Lipid metabolism > Fatty acid oxidation
	Q9DBL1	Short/branched chain specific acyl-CoA dehydrogenase, mitochondrial	ACDSB_MOUSE	Acadsb	-0.219294	0.0913756		MitoCarta3.0	literature, APEX_matrix, targetP signal, mito protein domain+, induction, coexpression, MS/MS++	Matrix	Metabolism > Lipid metabolism > Fatty acid oxidation | Metabolism > Amino acid metabolism > Branched-chain amino acid metabolism
	P50544	Very long-chain specific acyl-CoA dehydrogenase, mitochondrial	ACADV_MOUSE	Acadvl	-0.191155	0.120063		MitoCarta3.0	literature, APEX_matrix, targetP signal+, mito protein domain+, coexpression+, MS/MS++	MIM	Metabolism > Lipid metabolism > Fatty acid oxidation
	Q8K2H4	Arf-GAP with coiled-coil, ANK repeat and PH domain-containing protein 1	ACAP1_MOUSE	Acap1	-0.192774	0.0732512			Rickettsial homolog, mito protein domain
	Q6ZQK5	Arf-GAP with coiled-coil, ANK repeat and PH domain-containing protein 2	ACAP2_MOUSE	Acap2	-0.22673	0.0929237			Rickettsial homolog, mito protein domain
	Q8QZT1	Acetyl-CoA acetyltransferase, mitochondrial	THIL_MOUSE	Acat1	-0.162316	0.0763076		MitoCarta3.0	literature, APEX_matrix, targetP signal, Rickettsial homolog, mito protein domain, induction, coexpression+, MS/MS++	Matrix	Metabolism > Carbohydrate metabolism > Ketone metabolism | Metabolism > Lipid metabolism > Fatty acid oxidation | Metabolism > Amino acid metabolism > Branched-chain amino acid metabolism | Metabolism > Amino acid metabolism > Lysine metabolism
	Q8CAY6	Acetyl-CoA acetyltransferase, cytosolic	THIC_MOUSE	Acat2	-0.209425	0.0819097			Rickettsial homolog, mito protein domain, coexpression
	Q8BMP6	Golgi resident protein GCP60	GCP60_MOUSE	Acbd3	0.00429504	0.313716			mito protein domain
	Q5XG73;Q5XG73-2;Q5XG73-3	Acyl-CoA-binding domain-containing protein 5;Isoform 2 of Acyl-CoA-binding domain-containing protein 5;Isoform 3 of Acyl-CoA-binding domain-containing protein 5	ACBD5_MOUSE	Acbd5	-0.133622	0.18103			mito protein domain
	Q9D061	Acyl-CoA-binding domain-containing protein 6	ACBD6_MOUSE	Acbd6	-0.519786	0.0956763			Rickettsial homolog, mito protein domain
	Q5EE38	Adrenocortical dysplasia protein	ACD_MOUSE	Acd	-0.0975971	0.163422
	Q9JIX8;Q9JIX8-4	Apoptotic chromatin condensation inducer in the nucleus;Isoform 4 of Apoptotic chromatin condensation inducer in the nucleus	ACINU_MOUSE	Acin1	-0.0580783	0.199686			mito protein domain
	Q91V92	ATP-citrate synthase	ACLY_MOUSE	Acly	-0.312242	0.0732796		MitoCarta3.0	APEX_matrix, yeast mito homolog+, Rickettsial homolog, mito protein domain, coexpression	Matrix	Metabolism > Carbohydrate metabolism > TCA-associated
	P28271	Cytoplasmic aconitate hydratase	ACOC_MOUSE	Aco1	-0.398842	0.0647347			yeast mito homolog, Rickettsial homolog, mito protein domain, coexpression
	Q99KI0	Aconitate hydratase, mitochondrial	ACON_MOUSE	Aco2	-0.101268	0.109625		MitoCarta3.0	literature, APEX_matrix, targetP signal, yeast mito homolog, Rickettsial homolog, mito protein domain, induction, coexpression++, MS/MS++	Matrix	Metabolism > Carbohydrate metabolism > TCA cycle | Metabolism > Metals and cofactors > Fe-S-containing proteins
	Q8VHQ9	Acyl-coenzyme A thioesterase 11	ACO11_MOUSE	Acot11	-0.458165	0.0647347		MitoCarta3.0	literature,targetP signal, mito protein domain, coexpression	Matrix	Metabolism > Lipid metabolism > Fatty acid oxidation
	Q9CQR4	Acyl-coenzyme A thioesterase 13	ACO13_MOUSE	Acot13	-0.067088	0.186385		MitoCarta3.0	mito protein domain, induction, coexpression, MS/MS++	Matrix	Metabolism > Lipid metabolism
	Q9QYR9	Acyl-coenzyme A thioesterase 2, mitochondrial	ACOT2_MOUSE	Acot2	-0.0187375	0.271239		MitoCarta3.0	literature, targetP signal, mito protein domain, induction, coexpression, MS/MS++	Matrix	Metabolism > Lipid metabolism
	Q91V12-2	Isoform A of Cytosolic acyl coenzyme A thioester hydrolase	BACH_MOUSE	Acot7	-0.361745	0.0647347		MitoCarta3.0	targetP signal, mito protein domain, induction	Matrix	Metabolism > Lipid metabolism
	P58137	Acyl-coenzyme A thioesterase 8	ACOT8_MOUSE	Acot8	-0.302543	0.106733			yeast mito homolog
	Q9R0X4	Acyl-coenzyme A thioesterase 9, mitochondrial	ACOT9_MOUSE	Acot9	-0.229485	0.0672542		MitoCarta3.0	literature, targetP signal, MS/MS++	MIM	Metabolism > Lipid metabolism
	Q9EPL9	Peroxisomal acyl-coenzyme A oxidase 3	ACOX3_MOUSE	Acox3	-0.295984	0.0647347			mito protein domain+, induction
	Q9D358	Low molecular weight phosphotyrosine protein phosphatase	PPAC_MOUSE	Acp1	-0.242115	0.0757813			MS/MS
	Q8CE08;Q8CE08-2	Prostatic acid phosphatase;Isoform 2 of Prostatic acid phosphatase	PPAP_MOUSE	Acp3	-0.87418	0.0647347			mito protein domain
	Q05117	Tartrate-resistant acid phosphatase type 5	PPA5_MOUSE	Acp5	-0.447778	0.0647347
	Q8BP40	Lysophosphatidic acid phosphatase type 6	PPA6_MOUSE	Acp6	0.0975612	0.13073		MitoCarta3.0	literature, APEX_IMS, targetP signal, mito protein domain, MS/MS++	IMS	Metabolism > Lipid metabolism > Phospholipid metabolism
	Q8VCW8	Medium-chain acyl-CoA ligase ACSF2, mitochondrial	ACSF2_MOUSE	Acsf2	-0.271585	0.0722799		MitoCarta3.0	APEX_matrix, targetP signal, Rickettsial homolog, mito protein domain, MS/MS++	Matrix	Metabolism > Lipid metabolism > Fatty acid oxidation
	Q3URE1	Malonate--CoA ligase ACSF3, mitochondrial	ACSF3_MOUSE	Acsf3	-0.0502568	0.219467		MitoCarta3.0	APEX_matrix, targetP signal+, Rickettsial homolog, mito protein domain, coexpression+, MS/MS++	Matrix	Metabolism > Lipid metabolism > Type II fatty acid synthesis
	P41216	Long-chain-fatty-acid--CoA ligase 1	ACSL1_MOUSE	Acsl1	-0.231472	0.0755721		MitoCarta3.0	yeast mito homolog, Rickettsial homolog, mito protein domain, coexpression	MOM	Metabolism > Lipid metabolism > Fatty acid oxidation
	Q9CZW4	Long-chain-fatty-acid--CoA ligase 3	ACSL3_MOUSE	Acsl3	-0.535836	0.0657707			Rickettsial homolog, mito protein domain
	Q9QUJ7;Q9QUJ7-2	Long-chain-fatty-acid--CoA ligase 4;Isoform Short of Long-chain-fatty-acid--CoA ligase 4	ACSL4_MOUSE	Acsl4	-0.426904	0.0827568		mito-interacting	GFP, Rickettsial homolog, mito protein domain
	Q8JZR0	Long-chain-fatty-acid--CoA ligase 5	ACSL5_MOUSE	Acsl5	-0.229127	0.0672542			yeast mito homolog, Rickettsial homolog, mito protein domain, induction
	Q99NB1	Acetyl-coenzyme A synthetase 2-like, mitochondrial	ACS2L_MOUSE	Acss1	-0.0171813	0.270402		MitoCarta3.0	literature, APEX_matrix, targetP signal, mito protein domain, MS/MS++	MIM	Metabolism > Lipid metabolism > Fatty acid oxidation
	Q9QXG4	Acetyl-coenzyme A synthetase, cytoplasmic	ACSA_MOUSE	Acss2	-0.240471	0.0933703			mito protein domain, induction, coexpression
	P68134	Actin, alpha skeletal muscle	ACTS_MOUSE	Acta1	0.00731096	0.311916			MS/MS
	P60710	Actin, cytoplasmic 1	ACTB_MOUSE	Actb	-0.208333	0.0870412
	Q8BFZ3	Beta-actin-like protein 2	ACTBL_MOUSE	Actbl2	-0.265216	0.114076
	P68033	Actin, alpha cardiac muscle 1	ACTC_MOUSE	Actc1	-0.205805	0.0886234			coexpression
	P63260	Actin, cytoplasmic 2	ACTG_MOUSE	Actg1	-0.28824	0.108576
	Q9Z2N8	Actin-like protein 6A	ACL6A_MOUSE	Actl6a	-0.120345	0.0931613
	Q7TPR4	Alpha-actinin-1	ACTN1_MOUSE	Actn1	-0.277255	0.0647347			mito protein domain
	O88990	Alpha-actinin-3	ACTN3_MOUSE	Actn3	-1.02242	0.0647347
	P57780	Alpha-actinin-4	ACTN4_MOUSE	Actn4	-0.192907	0.100659			mito protein domain
	Q9QZB7	Actin-related protein 10	ARP10_MOUSE	Actr10	-0.335042	0.0680051
	P61164	Alpha-centractin	ACTZ_MOUSE	Actr1a	-0.198974	0.0897932
	Q8R5C5	Beta-centractin	ACTY_MOUSE	Actr1b	-0.281657	0.069005
	P61161	Actin-related protein 2	ARP2_MOUSE	Actr2	-0.343088	0.0647347			yeast mito homolog
	Q99JY9	Actin-related protein 3	ARP3_MOUSE	Actr3	-0.399276	0.0647347
	Q80US4	Actin-related protein 5	ARP5_MOUSE	Actr5	-0.0438151	0.300047
	Q9D864	Actin-related protein 6	ARP6_MOUSE	Actr6	-0.0947291	0.188201			induction
	Q8R2S9	Actin-related protein 8	ARP8_MOUSE	Actr8	-0.202502	0.0647347
	Q99JW2	Aminoacylase-1	ACY1_MOUSE	Acy1	-0.27537	0.0647347			Rickettsial homolog
	P56376	Acylphosphatase-1	ACYP1_MOUSE	Acyp1	-0.17228	0.0757813			MS/MS++
	P03958	Adenosine deaminase	ADA_MOUSE	Ada	-0.411406	0.0647347			MS/MS
	O35598	Disintegrin and metalloproteinase domain-containing protein 10	ADA10_MOUSE	Adam10	-0.158702	0.0867153
	Q9Z0F8;Q9Z0F8-2	Disintegrin and metalloproteinase domain-containing protein 17;Isoform Short of Disintegrin and metalloproteinase domain-containing protein 17	ADA17_MOUSE	Adam17	-0.217631	0.113205
	O35674	Disintegrin and metalloproteinase domain-containing protein 19	ADA19_MOUSE	Adam19	-0.463825	0.0698014
	Q05910	Disintegrin and metalloproteinase domain-containing protein 8	ADAM8_MOUSE	Adam8	-0.755093	0.146816
	E9PY16	ArfGAP with dual PH domains 1	E9PY16_MOUSE	Adap1	-0.154988	0.0780596			mito protein domain
	Q99MU3-2	Isoform 2 of Double-stranded RNA-specific adenosine deaminase	DSRAD_MOUSE	Adar	-0.282968	0.0719922			mito protein domain
	Q9JHI2;Q9JHI2-2;Q9JHI2-3	tRNA-specific adenosine deaminase 1;Isoform 2 of tRNA-specific adenosine deaminase 1;Isoform 3 of tRNA-specific adenosine deaminase 1	ADAT1_MOUSE	Adat1	-0.0796705	0.162652
	Q6P6J0	tRNA-specific adenosine deaminase 2	ADAT2_MOUSE	Adat2	-1.93484	0.1271			Rickettsial homolog
	Q9D0L4	AarF domain-containing protein kinase 1	ADCK1_MOUSE	Adck1	-0.412378	0.0647347		MitoCarta3.0	yeast mito homolog+, Rickettsial homolog, mito protein domain, MS/MS	unknown
	Q80V03;Q80V03-2	Uncharacterized aarF domain-containing protein kinase 5;Isoform 2 of Uncharacterized aarF domain-containing protein kinase 5	ADCK5_MOUSE	Adck5	-0.144508	0.202184		MitoCarta3.0	targetP signal, yeast mito homolog+, Rickettsial homolog, mito protein domain, induction, coexpression, MS/MS	unknown
	Q8VHH7	Adenylate cyclase type 3	ADCY3_MOUSE	Adcy3	-0.135183	0.238462			mito protein domain, coexpression
	P51829	Adenylate cyclase type 7	ADCY7_MOUSE	Adcy7	-0.359515	0.0842908			mito protein domain
	Q9QYC0	Alpha-adducin	ADDA_MOUSE	Add1	-0.117045	0.103441			Rickettsial homolog
	Q9QYB5-2	Isoform 1 of Gamma-adducin	ADDG_MOUSE	Add3	-0.0524683	0.186385			Rickettsial homolog
	Q9Z0M6;Q9Z0M6-3	Adhesion G protein-coupled receptor E5;Isoform 3 of Adhesion G protein-coupled receptor E5	AGRE5_MOUSE	Adgre5	-0.310663	0.0647347
	P28474	Alcohol dehydrogenase class-3	ADHX_MOUSE	Adh5	-0.123836	0.117421			yeast mito homolog, mito protein domain, coexpression
	Q99JT9	1,2-dihydroxy-3-keto-5-methylthiopentene dioxygenase	MTND_MOUSE	Adi1	-0.130991	0.123545
	P55264	Adenosine kinase	ADK_MOUSE	Adk	0.0573644	0.195785			coexpression
	Q9Z103	Activity-dependent neuroprotector homeobox protein	ADNP_MOUSE	Adnp	-0.075157	0.149751
	Q8CHC8	Activity-dependent neuroprotector homeobox protein 2	ADNP2_MOUSE	Adnp2	-0.150605	0.0871535
	Q6PDY2	2-aminoethanethiol dioxygenase	AEDO_MOUSE	Ado	-0.048991	0.244219			targetP signal, MS/MS
	Q8VDL4;Q8VDL4-3	ADP-dependent glucokinase;Isoform 3 of ADP-dependent glucokinase	ADPGK_MOUSE	Adpgk	-0.123348	0.0947053
	P54923	[Protein ADP-ribosylarginine] hydrolase	ADPRH_MOUSE	Adprh	-0.055581	0.179107			mito protein domain
	Q99KS6;Q99KS6-2	Manganese-dependent ADP-ribose/CDP-alcohol diphosphatase;Isoform 2 of Manganese-dependent ADP-ribose/CDP-alcohol diphosphatase	ADPRM_MOUSE	Adprm	-0.544977	0.0651187
	Q8CG72	ADP-ribose glycohydrolase ARH3	ADPRS_MOUSE	Adprs	0.0806374	0.193896			targetP signal, mito protein domain
	Q9JKV1	Proteasomal ubiquitin receptor ADRM1	ADRM1_MOUSE	Adrm1	-0.128434	0.109372
	P54822	Adenylosuccinate lyase	PUR8_MOUSE	Adsl	-0.120868	0.0908691			Rickettsial homolog, mito protein domain, induction, coexpression
	P28650;P28650-2	Adenylosuccinate synthetase isozyme 1;Isoform 2 of Adenylosuccinate synthetase isozyme 1	PURA1_MOUSE	Adss1	-0.623798	0.130019			induction
	P46664	Adenylosuccinate synthetase isozyme 2	PURA2_MOUSE	Adss2	-0.13566	0.115946			induction
	Q9Z248;Q9Z248-2	Zinc finger protein AEBP2;Isoform 2 of Zinc finger protein AEBP2	AEBP2_MOUSE	Aebp2	-0.306243	0.0647347
	Q9CZI9	Apoptosis-enhancing nuclease	AEN_MOUSE	Aen	-0.300404	0.0897932			Rickettsial homolog, mito protein domain
	Q9QZQ1;Q9QZQ1-2	Afadin;Isoform 1 of Afadin	AFAD_MOUSE	Afdn	0.819076	0.100439			mito protein domain
	Q920A7	AFG3-like protein 1	AFG31_MOUSE	Afg3l1	-0.227731	0.0766901		MitoCarta3.0	literature, targetP signal, yeast mito homolog, Rickettsial homolog, mito protein domain+, coexpression, MS/MS+	MIM	Protein import, sorting and homeostasis > Protein homeostasis > Proteases
	Q8JZQ2	AFG3-like protein 2	AFG32_MOUSE	Afg3l2	-0.248016	0.0737609		MitoCarta3.0	literature, APEX_matrix, targetP signal, yeast mito homolog, Rickettsial homolog, mito protein domain+, induction, coexpression++, MS/MS++	MIM	Protein import, sorting and homeostasis > Protein homeostasis > Proteases
	Q8K4H1	Kynurenine formamidase	KFA_MOUSE	Afmid	-0.301824	0.0903936			mito protein domain, coexpression
	Q80WT5;Q80WT5-2	Aftiphilin;Isoform 2 of Aftiphilin	AFTIN_MOUSE	Aftph	0.482879	0.187784
	Q64191	N(4)-(beta-N-acetylglucosaminyl)-L-asparaginase	ASPG_MOUSE	Aga	0.509719	0.120113
	Q3UHD9;Q3UHD9-2	Arf-GAP with GTPase, ANK repeat and PH domain-containing protein 2;Isoform 2 of Arf-GAP with GTPase, ANK repeat and PH domain-containing protein 2	AGAP2_MOUSE	Agap2	-0.206808	0.0766901			targetP signal, mito protein domain
	Q8VHH5	Arf-GAP with GTPase, ANK repeat and PH domain-containing protein 3	AGAP3_MOUSE	Agap3	-0.181646	0.0931323
	Q8K2K6;Q8K2K6-1;Q8K2K6-3	Arf-GAP domain and FG repeat-containing protein 1;Isoform 1 of Arf-GAP domain and FG repeat-containing protein 1;Isoform 3 of Arf-GAP domain and FG repeat-containing protein 1	AGFG1_MOUSE	Agfg1	-0.152683	0.125208
	Q80WC7;Q80WC7-2	Arf-GAP domain and FG repeat-containing protein 2;Isoform 2 of Arf-GAP domain and FG repeat-containing protein 2	AGFG2_MOUSE	Agfg2	-0.262308	0.0908363
	Q7TN31	Angiogenic factor with G patch and FHA domains 1	AGGF1_MOUSE	Aggf1	-0.119898	0.207842			mito protein domain, induction
	Q9ESW4	Acylglycerol kinase, mitochondrial	AGK_MOUSE	Agk	-0.0409875	0.23596		MitoCarta3.0	literature, APEX_IMS, mito protein domain	MIM	Protein import, sorting and homeostasis > Protein import and sorting > TIM22 carrier pathway | Metabolism > Lipid metabolism > Phospholipid metabolism
	F8VPN4	Amylo-1,6-glucosidase, 4-alpha-glucanotransferase	F8VPN4_MOUSE	Agl	-0.192679	0.173736			yeast mito homolog, mito protein domain, induction
	Q8CJG1	Protein argonaute-1	AGO1_MOUSE	Ago1	0.0569895	0.248444
	Q8CJG0	Protein argonaute-2	AGO2_MOUSE	Ago2	-0.116887	0.142925
	O35083	1-acyl-sn-glycerol-3-phosphate acyltransferase alpha	PLCA_MOUSE	Agpat1	-0.102276	0.140729			Rickettsial homolog, mito protein domain
	Q9D517	1-acyl-sn-glycerol-3-phosphate acyltransferase gamma	PLCC_MOUSE	Agpat3	-0.171124	0.0818805			mito protein domain, induction, coexpression
	Q8K4X7	1-acyl-sn-glycerol-3-phosphate acyltransferase delta	PLCD_MOUSE	Agpat4	-0.236271	0.265306		MitoCarta3.0	literature,mito protein domain, induction	MOM	Metabolism > Lipid metabolism > Cardiolipin synthesis | Metabolism > Lipid metabolism > Phospholipid metabolism
	Q9D1E8	1-acyl-sn-glycerol-3-phosphate acyltransferase epsilon	PLCE_MOUSE	Agpat5	-0.196224	0.105379		MitoCarta3.0	literature, mito protein domain, induction, MS/MS	MOM	Metabolism > Lipid metabolism > Cardiolipin synthesis | Metabolism > Lipid metabolism > Phospholipid metabolism
	Q8C0I1	Alkyldihydroxyacetonephosphate synthase, peroxisomal	ADAS_MOUSE	Agps	-0.310659	0.0778163			yeast mito homolog+, mito protein domain
	Q8CJF7	Protein ELYS	ELYS_MOUSE	Ahctf1	-0.0479393	0.197147
	P50247	Adenosylhomocysteinase	SAHH_MOUSE	Ahcy	-0.0802243	0.120126			mito protein domain+
	Q80SW1	S-adenosylhomocysteine hydrolase-like protein 1	SAHH2_MOUSE	Ahcyl1	-0.0794588	0.280705		MitoCarta3.0	mito protein domain+, induction	MOM	Mitochondrial dynamics and surveillance > Organelle contact sites
	Q68FL4	Putative adenosylhomocysteinase 3	SAHH3_MOUSE	Ahcyl2	-0.120151	0.0929897			mito protein domain
	Q6PAL7	AT-hook DNA-binding motif-containing protein 1	AHDC1_MOUSE	Ahdc1	0.0295992	0.279914
	E9Q616	AHNAK nucleoprotein (desmoyokin)	E9Q616_MOUSE	Ahnak	-0.29447	0.0946661			mito protein domain
	Q8BK64	Activator of 90 kDa heat shock protein ATPase homolog 1	AHSA1_MOUSE	Ahsa1	-0.157151	0.0922271
	Q8N9S3;Q8N9S3-2;Q8N9S3-3	Activator of 90 kDa heat shock protein ATPase homolog 2;Isoform 2 of Activator of 90 kDa heat shock protein ATPase homolog 2;Isoform 3 of Activator of 90 kDa heat shock protein ATPase homolog 2	AHSA2_MOUSE	Ahsa2	-0.250729	0.0898241
	Q8C4Q6	Axin interactor, dorsalization-associated protein	AIDA_MOUSE	Aida	-0.339916	0.0850803			targetP signal
	Q9Z0X1	Apoptosis-inducing factor 1, mitochondrial	AIFM1_MOUSE	Aifm1	-0.109069	0.0929237		MitoCarta3.0	literature, APEX_IMS, targetP signal, yeast mito homolog, mito protein domain, induction, coexpression++, MS/MS++	MIM	Protein import, sorting and homeostasis > Protein import and sorting > MIA40 | OXPHOS > Complex I > CI assembly factors | OXPHOS > OXPHOS assembly factors | Mitochondrial dynamics and surveillance > Apoptosis
	Q91VJ1	Interferon-inducible protein AIM2	AIM2_MOUSE	Aim2	-0.652546	0.0695161
	P31230	Aminoacyl tRNA synthase complex-interacting multifunctional protein 1	AIMP1_MOUSE	Aimp1	-0.176503	0.0776553
	Q8R010	Aminoacyl tRNA synthase complex-interacting multifunctional protein 2	AIMP2_MOUSE	Aimp2	-0.291783	0.0647347			mito protein domain
	O08915	AH receptor-interacting protein	AIP_MOUSE	Aip	-0.218458	0.0696503			yeast mito homolog+, mito protein domain
	Q9WTP6;Q9WTP6-2	Adenylate kinase 2, mitochondrial;Isoform 2 of Adenylate kinase 2, mitochondrial	KAD2_MOUSE	Ak2	0.0672785	0.154424		MitoCarta3.0	literature, APEX_IMS, yeast mito homolog, Rickettsial homolog, mito protein domain, coexpression+, MS/MS++	IMS	Metabolism > Nucleotide metabolism > Nucleotide synthesis and processing
	Q9WTP7	GTP:AMP phosphotransferase AK3, mitochondrial	KAD3_MOUSE	Ak3	-0.240934	0.0661151		MitoCarta3.0	literature, APEX_matrix, targetP signal, yeast mito homolog, Rickettsial homolog, mito protein domain, induction, coexpression, MS/MS++	Matrix	Metabolism > Nucleotide metabolism > Nucleotide synthesis and processing
	Q9WUR9	Adenylate kinase 4, mitochondrial	KAD4_MOUSE	Ak4	-0.115932	0.234499		MitoCarta3.0	APEX_matrix, yeast mito homolog++, Rickettsial homolog, mito protein domain, MS/MS++	Matrix	Metabolism > Nucleotide metabolism > Nucleotide synthesis and processing
	Q8VCP8	Adenylate kinase isoenzyme 6	KAD6_MOUSE	Ak6	-0.373821	0.237941			Rickettsial homolog, mito protein domain
	O08715;O08715-4	A-kinase anchor protein 1, mitochondrial;Isoform 4 of A-kinase anchor protein 1, mitochondrial	AKAP1_MOUSE	Akap1	0.0324384	0.296588		MitoCarta3.0	literature, mito protein domain, induction, coexpression++, MS/MS+	MOM	Signaling > cAMP-PKA signaling
	O88845	A-kinase anchor protein 10, mitochondrial	AKA10_MOUSE	Akap10	-0.448833	0.0672542		MitoCarta3.0	literature, mito protein domain	MOM	Signaling > cAMP-PKA signaling
	E9Q774;E9Q777	A kinase (PRKA) anchor protein 11	E9Q774_MOUSE;E9Q777_MOUSE	Akap11	-0.396308	0.121936
	E9Q394-2	Isoform 2 of A-kinase anchor protein 13	AKP13_MOUSE	Akap13	-0.0981683	0.1054			mito protein domain
	Q9DBR0	A-kinase anchor protein 8	AKAP8_MOUSE	Akap8	-0.0904377	0.12283
	Q9R0L7	A-kinase anchor protein 8-like	AKP8L_MOUSE	Akap8l	-0.0537135	0.20702
	Q80VW7	Microtubule organization protein AKNA	AKNA_MOUSE	Akna	-0.221634	0.0897932
	Q9JII6	Aldo-keto reductase family 1 member A1	AK1A1_MOUSE	Akr1a1	-0.124136	0.0938306
	P45376	Aldo-keto reductase family 1 member B1	ALDR_MOUSE	Akr1b1	-0.141406	0.0821014
	G5E895	Aldo-keto reductase family 1, member B10 (aldose reductase)	G5E895_MOUSE	Akr1b10	0.2442	0.141446		MitoCarta3.0	induction, coexpression, MS/MS++	unknown	Metabolism > Vitamin metabolism > Vitamin A metabolism | Metabolism > Detoxification > Xenobiotic metabolism
	Q8VC28	Aldo-keto reductase family 1 member C13	AK1CD_MOUSE	Akr1c13	0.0123341	0.289364
	Q9DCT1	1,5-anhydro-D-fructose reductase	AKCL2_MOUSE	Akr1e2	0.401461	0.0746021			coexpression
	Q8CG76	Aflatoxin B1 aldehyde reductase member 2	ARK72_MOUSE	Akr7a2	-0.146937	0.075884		MitoCarta3.0	APEX_matrix, targetP signal+, coexpression, MS/MS++	Matrix	Metabolism > Amino acid metabolism > GABA metabolism | Metabolism > Detoxification > Xenobiotic metabolism
	P31750	RAC-alpha serine/threonine-protein kinase	AKT1_MOUSE	Akt1	-0.336343	0.0647347			mito protein domain
	Q9D1F4	Proline-rich AKT1 substrate 1	AKTS1_MOUSE	Akt1s1	-0.0717768	0.226498			coexpression
	Q60823	RAC-beta serine/threonine-protein kinase	AKT2_MOUSE	Akt2	-0.292853	0.0670697			mito protein domain, coexpression
	Q64362	AKT-interacting protein	AKTIP_MOUSE	Aktip	-0.283104	0.166361
	P10518	Delta-aminolevulinic acid dehydratase	HEM2_MOUSE	Alad	-0.594579	0.0653184			Rickettsial homolog, coexpression
	P07724	Albumin	ALBU_MOUSE	Alb	-0.0307723	0.297614
	Q61490	CD166 antigen	CD166_MOUSE	Alcam	0.0453458	0.296276
	Q571I9	Aldehyde dehydrogenase family 16 member A1	A16A1_MOUSE	Aldh16a1	-0.210119	0.0651187			yeast mito homolog, mito protein domain, coexpression
	Q9Z110	Delta-1-pyrroline-5-carboxylate synthase	P5CS_MOUSE	Aldh18a1	-0.139514	0.0765516		MitoCarta3.0	literature, targetP signal+, Rickettsial homolog, mito protein domain, coexpression, MS/MS++	Matrix	Metabolism > Amino acid metabolism > Proline metabolism
	Q9CZS1	Aldehyde dehydrogenase X, mitochondrial	AL1B1_MOUSE	Aldh1b1	0.00753676	0.307147		MitoCarta3.0	literature, APEX_matrix, targetP signal, yeast mito homolog+, mito protein domain, MS/MS++	Matrix	Metabolism > Detoxification > Xenobiotic metabolism
	P47738	Aldehyde dehydrogenase, mitochondrial	ALDH2_MOUSE	Aldh2	0.0880228	0.243111		MitoCarta3.0	literature, APEX_matrix, targetP signal, yeast mito homolog+, mito protein domain, coexpression, MS/MS++	Matrix	Metabolism > Detoxification > Xenobiotic metabolism
	P47740	Aldehyde dehydrogenase family 3 member A2	AL3A2_MOUSE	Aldh3a2	-0.199828	0.0696503		MitoCarta3.0	targetP signal+, yeast mito homolog, mito protein domain, coexpression	Membrane	Metabolism > Detoxification > ROS and glutathione metabolism
	Q8CHT0	Delta-1-pyrroline-5-carboxylate dehydrogenase, mitochondrial	AL4A1_MOUSE	Aldh4a1	-0.271869	0.0647347		MitoCarta3.0	literature, APEX_matrix, targetP signal+, yeast mito homolog++, mito protein domain, coexpression, MS/MS++	Matrix	Metabolism > Amino acid metabolism > Proline metabolism | Metabolism > Amino acid metabolism > Glyoxylate metabolism
	Q9DBF1-2	Isoform 2 of Alpha-aminoadipic semialdehyde dehydrogenase	AL7A1_MOUSE	Aldh7a1	-0.201703	0.0994427		MitoCarta3.0	literature, APEX_matrix, targetP signal, yeast mito homolog, mito protein domain, MS/MS++	Matrix	Metabolism > Amino acid metabolism > Lysine metabolism | Metabolism > Amino acid metabolism > Glycine metabolism | Metabolism > Vitamin metabolism > Choline and betaine metabolism | Metabolism > Vitamin metabolism > Folate and 1-C metabolism | Metabolism > Detoxification > ROS and glutathione metabolism
	Q9JLJ2	4-trimethylaminobutyraldehyde dehydrogenase	AL9A1_MOUSE	Aldh9a1	-0.154034	0.0798306		MitoCarta3.0	APEX_matrix, targetP signal, yeast mito homolog+, mito protein domain, coexpression, MS/MS++	Matrix	Metabolism > Amino acid metabolism > GABA metabolism | Metabolism > Detoxification > ROS and glutathione metabolism
	P05064	Fructose-bisphosphate aldolase A	ALDOA_MOUSE	Aldoa	-0.39323	0.105991
	P05063	Fructose-bisphosphate aldolase C	ALDOC_MOUSE	Aldoc	-0.508595	0.0910445
	Q921Q3;Q921Q3-2	Chitobiosyldiphosphodolichol beta-mannosyltransferase;Isoform 2 of Chitobiosyldiphosphodolichol beta-mannosyltransferase	ALG1_MOUSE	Alg1	0.196538	0.231623
	Q3UGP8	Putative Dol-P-Glc:Glc(2)Man(9)GlcNAc(2)-PP-Dol alpha-1,2-glucosyltransferase	AG10B_MOUSE	Alg10b	-0.410395	0.0651187
	Q3TZM9	GDP-Man:Man(3)GlcNAc(2)-PP-Dol alpha-1,2-mannosyltransferase	ALG11_MOUSE	Alg11	-0.179039	0.0676317
	Q9DBE8	Alpha-1,3/1,6-mannosyltransferase ALG2	ALG2_MOUSE	Alg2	-0.0255791	0.270921			targetP signal, Rickettsial homolog
	Q8K2A8	Dol-P-Man:Man(5)GlcNAc(2)-PP-Dol alpha-1,3-mannosyltransferase	ALG3_MOUSE	Alg3	-0.271386	0.0647347			targetP signal, coexpression
	Q9DB25	Dolichyl-phosphate beta-glucosyltransferase	ALG5_MOUSE	Alg5	-0.327196	0.0647347			Rickettsial homolog
	Q6P8H8	Probable dolichyl pyrophosphate Glc1Man9GlcNAc2 alpha-1,3-glucosyltransferase	ALG8_MOUSE	Alg8	-0.271021	0.0653184
	Q8VDI9	Alpha-1,2-mannosyltransferase ALG9	ALG9_MOUSE	Alg9	-0.290979	0.0647347			coexpression
	Q8K1E6	Alpha-ketoglutarate-dependent dioxygenase alkB homolog 3	ALKB3_MOUSE	Alkbh3	-0.208106	0.0707844			mito protein domain, induction, coexpression
	Q3TSG4	RNA demethylase ALKBH5	ALKB5_MOUSE	Alkbh5	0.0126934	0.29869			mito protein domain
	Q8K2U2	Alpha-ketoglutarate-dependent dioxygenase alkB homolog 6	ALKB6_MOUSE	Alkbh6	0.0268795	0.28862			mito protein domain, induction
	Q80Y20;Q80Y20-2	Alkylated DNA repair protein alkB homolog 8;Isoform 2 of Alkylated DNA repair protein alkB homolog 8	ALKB8_MOUSE	Alkbh8	-0.0754188	0.27893			mito protein domain
	O08583	THO complex subunit 4	THOC4_MOUSE	Alyref	0.0883887	0.175793			mito protein domain
	A2AH22;A2AH22-2;A2AH22-5;A2AH22-6;A2AH22-7	Activating molecule in BECN1-regulated autophagy protein 1;Isoform 2 of Activating molecule in BECN1-regulated autophagy protein 1;Isoform 5 of Activating molecule in BECN1-regulated autophagy protein 1;Isoform 6 of Activating molecule in BECN1-regulated autophagy protein 1;Isoform 7 of Activating molecule in BECN1-regulated autophagy protein 1	AMRA1_MOUSE	Ambra1	0.0579856	0.27542			mito protein domain
	Q8JZV7	N-acetylglucosamine-6-phosphate deacetylase	NAGA_MOUSE	Amdhd2	-0.249036	0.077858
	Q9R049-2	Isoform 2 of E3 ubiquitin-protein ligase AMFR	AMFR_MOUSE	Amfr	-0.230894	0.124523			mito protein domain, coexpression
	Q8JZZ6	AMMECR1-like protein	AMERL_MOUSE	Ammecr1l	-0.0725162	0.225182
	Q9DBT5	AMP deaminase 2	AMPD2_MOUSE	Ampd2	-0.384423	0.178404			targetP signal
	P53995	Anaphase-promoting complex subunit 1	APC1_MOUSE	Anapc1	-0.208393	0.0719922
	Q9CPX9	Anaphase-promoting complex subunit 11	APC11_MOUSE	Anapc11	-0.137185	0.192867
	Q8BZQ7	Anaphase-promoting complex subunit 2	ANC2_MOUSE	Anapc2	-0.237387	0.0674832
	Q91W96	Anaphase-promoting complex subunit 4	APC4_MOUSE	Anapc4	-0.0300875	0.272994
	Q8BTZ4	Anaphase-promoting complex subunit 5	APC5_MOUSE	Anapc5	-0.195139	0.108607			mito protein domain, coexpression
	Q9WVM3	Anaphase-promoting complex subunit 7	APC7_MOUSE	Anapc7	0.0375708	0.271073			mito protein domain
	Q8K1C0;Q8K1C0-2;Q8K1C0-3	Protein angel homolog 2;Isoform 2 of Protein angel homolog 2;Isoform 3 of Protein angel homolog 2	ANGE2_MOUSE	Angel2	-0.376345	0.0647347		MitoCarta3.0	APEX_matrix, mito protein domain, MS/MS	Matrix	Mitochondrial central dogma > mtRNA metabolism > mt-mRNA modifications
	Q810B6	Rabankyrin-5	ANFY1_MOUSE	Ankfy1	-2.25294	0.0435421			Rickettsial homolog, mito protein domain
	E9PUR0;E9Q1M6	Ankyrin repeat and KH domain-containing 1	E9PUR0_MOUSE;E9Q1M6_MOUSE	Ankhd1	-0.494594	0.0867153			Rickettsial homolog, mito protein domain
	Q6P1H6	Ankyrin repeat and LEM domain-containing protein 2	ANKL2_MOUSE	Ankle2	-0.226811	0.10948
	Q3TPE9	Ankyrin repeat and MYND domain-containing protein 2	ANKY2_MOUSE	Ankmy2	-0.305283	0.0685969			Rickettsial homolog, mito protein domain
	Q99LW0	Ankyrin repeat domain-containing protein 10	ANR10_MOUSE	Ankrd10	-0.18391	0.103867			Rickettsial homolog, mito protein domain
	E9Q4F7	Ankyrin repeat domain-containing protein 11	ANR11_MOUSE	Ankrd11	-0.194618	0.146252			Rickettsial homolog, mito protein domain
	Q80UP5	Ankyrin repeat domain-containing protein 13A	AN13A_MOUSE	Ankrd13a	-0.352334	0.0670697			mito protein domain
	Q99NH0	Ankyrin repeat domain-containing protein 17	ANR17_MOUSE	Ankrd17	-0.235149	0.0938306			Rickettsial homolog, mito protein domain
	Q505D1	Serine/threonine-protein phosphatase 6 regulatory ankyrin repeat subunit A	ANR28_MOUSE	Ankrd28	-0.0495324	0.265336			Rickettsial homolog, mito protein domain
	B2RXR6	Serine/threonine-protein phosphatase 6 regulatory ankyrin repeat subunit B	ANR44_MOUSE	Ankrd44	-0.337973	0.0647347			Rickettsial homolog, mito protein domain
	Q8BTZ5	Ankyrin repeat domain-containing protein 46	ANR46_MOUSE	Ankrd46	-0.109335	0.268037			Rickettsial homolog, mito protein domain
	Q8VE42	Ankyrin repeat domain-containing protein 49	ANR49_MOUSE	Ankrd49	-0.322138	0.0651187			Rickettsial homolog, mito protein domain
	Q8BTI7	Serine/threonine-protein phosphatase 6 regulatory ankyrin repeat subunit C	ANR52_MOUSE	Ankrd52	-0.361301	0.138252			Rickettsial homolog, mito protein domain
	Q91WK7	Ankyrin repeat domain-containing protein 54	ANR54_MOUSE	Ankrd54	-0.145571	0.120126			Rickettsial homolog, mito protein domain
	P59672;P59672-2	Ankyrin repeat and SAM domain-containing protein 1A;Isoform 2 of Ankyrin repeat and SAM domain-containing protein 1A	ANS1A_MOUSE	Anks1a	-0.28987	0.0647347			Rickettsial homolog, mito protein domain, coexpression
	Q80UU1	Ankyrin repeat and zinc finger domain-containing protein 1	ANKZ1_MOUSE	Ankzf1	-0.344148	0.068554			yeast mito homolog, mito protein domain, induction
	Q8K298	Anillin	ANLN_MOUSE	Anln	-0.102507	0.269736			mito protein domain
	Q8BH79;Q8BH79-2	Anoctamin-10;Isoform 2 of Anoctamin-10	ANO10_MOUSE	Ano10	-0.244842	0.068932			coexpression
	Q6P9J9	Anoctamin-6	ANO6_MOUSE	Ano6	-0.0894308	0.186973
	O35381	Acidic leucine-rich nuclear phosphoprotein 32 family member A	AN32A_MOUSE	Anp32a	-0.0206935	0.261131			mito protein domain
	Q9EST5;Q9EST5-2	Acidic leucine-rich nuclear phosphoprotein 32 family member B;Isoform 2 of Acidic leucine-rich nuclear phosphoprotein 32 family member B	AN32B_MOUSE	Anp32b	-0.0146685	0.278308			mito protein domain, MS/MS
	P97822	Acidic leucine-rich nuclear phosphoprotein 32 family member E	AN32E_MOUSE	Anp32e	-0.0696767	0.222594			mito protein domain
	Q501J2	Adenine nucleotide translocase lysine N-methyltransferase	ANKMT_MOUSE	Antkmt	-0.186034	0.149889		MitoCarta3.0	literature,coexpression, MS/MS	MIM	Metabolism > Nucleotide metabolism
	P10107	Annexin A1	ANXA1_MOUSE	Anxa1	-0.973455	0.0838412			MS/MS
	P97384	Annexin A11	ANX11_MOUSE	Anxa11	-0.270404	0.0676123
	P07356	Annexin A2	ANXA2_MOUSE	Anxa2	-0.39368	0.103586
	P97429	Annexin A4	ANXA4_MOUSE	Anxa4	-0.182459	0.231619
	P48036	Annexin A5	ANXA5_MOUSE	Anxa5	-0.262827	0.0660715
	P14824	Annexin A6	ANXA6_MOUSE	Anxa6	-0.223939	0.0722702
	Q07076	Annexin A7	ANXA7_MOUSE	Anxa7	-0.271699	0.0647347
	O35643	AP-1 complex subunit beta-1	AP1B1_MOUSE	Ap1b1	-0.259868	0.0721979
	P22892	AP-1 complex subunit gamma-1	AP1G1_MOUSE	Ap1g1	-0.262044	0.0732512			targetP signal, coexpression
	O88512	AP-1 complex subunit gamma-like 2	AP1G2_MOUSE	Ap1g2	-0.213017	0.0647347
	P35585	AP-1 complex subunit mu-1	AP1M1_MOUSE	Ap1m1	-0.250989	0.0647347
	P61967	AP-1 complex subunit sigma-1A	AP1S1_MOUSE	Ap1s1	-0.117057	0.0973224			targetP signal
	Q9DB50	AP-1 complex subunit sigma-2	AP1S2_MOUSE	Ap1s2	-0.536673	0.0647347			targetP signal
	Q7TN05	AP-1 complex subunit sigma-3	AP1S3_MOUSE	Ap1s3	-0.362219	0.0651187			targetP signal
	P17426;P17426-2	AP-2 complex subunit alpha-1;Isoform B of AP-2 complex subunit alpha-1	AP2A1_MOUSE	Ap2a1	-0.252201	0.0647347
	P17427	AP-2 complex subunit alpha-2	AP2A2_MOUSE	Ap2a2	-0.257292	0.0841423
	Q9DBG3;Q9DBG3-2	AP-2 complex subunit beta;Isoform 2 of AP-2 complex subunit beta	AP2B1_MOUSE	Ap2b1	-0.320523	0.0664821
	P84091	AP-2 complex subunit mu	AP2M1_MOUSE	Ap2m1	-0.257065	0.077825			induction
	P62743	AP-2 complex subunit sigma	AP2S1_MOUSE	Ap2s1	-0.601992	0.0647347
	Q9Z1T1	AP-3 complex subunit beta-1	AP3B1_MOUSE	Ap3b1	-0.415316	0.0778815			MS/MS
	O54774	AP-3 complex subunit delta-1	AP3D1_MOUSE	Ap3d1	-0.306998	0.0651187			MS/MS
	Q9JKC8	AP-3 complex subunit mu-1	AP3M1_MOUSE	Ap3m1	-0.393263	0.069005			MS/MS
	Q9DCR2	AP-3 complex subunit sigma-1	AP3S1_MOUSE	Ap3s1	-0.307939	0.0680051
	Q9WV76	AP-4 complex subunit beta-1	AP4B1_MOUSE	Ap4b1	0.116882	0.248444
	Q80V94	AP-4 complex subunit epsilon-1	AP4E1_MOUSE	Ap4e1	-0.183564	0.174817
	Q9JKC7	AP-4 complex subunit mu-1	AP4M1_MOUSE	Ap4m1	-0.17897	0.089149
	Q9WVL1	AP-4 complex subunit sigma-1	AP4S1_MOUSE	Ap4s1	-0.315586	0.0647347			coexpression
	Q3TAP4	AP-5 complex subunit beta-1	AP5B1_MOUSE	Ap5b1	-0.46423	0.0647347			targetP signal
	Q8BJ63	AP-5 complex subunit mu-1	AP5M1_MOUSE	Ap5m1	-0.313676	0.0647347			targetP signal, induction
	Q3U829	AP-5 complex subunit zeta-1	AP5Z1_MOUSE	Ap5z1	-0.193031	0.0741495
	O88879	Apoptotic protease-activating factor 1	APAF_MOUSE	Apaf1	-0.339814	0.0660575			mito protein domain
	Q8R5A3	Amyloid beta A4 precursor protein-binding family B member 1-interacting protein	AB1IP_MOUSE	Apbb1ip	-0.338431	0.0647347			mito protein domain
	Q8R146;Q8R146-2	Acylamino-acid-releasing enzyme;Isoform 2 of Acylamino-acid-releasing enzyme	APEH_MOUSE	Apeh	-0.166259	0.118161			Rickettsial homolog, MS/MS
	P28352	DNA-(apurinic or apyrimidinic site) endonuclease	APEX1_MOUSE	Apex1	0.102979	0.12326		MitoCarta3.0	literature,Rickettsial homolog, mito protein domain	Matrix	Mitochondrial central dogma > mtDNA maintenance > mtDNA repair
	O35841	Apoptosis inhibitor 5	API5_MOUSE	Api5	-0.0733983	0.159852
	Q9WVQ5	Methylthioribulose-1-phosphate dehydratase	MTNB_MOUSE	Apip	-0.19653	0.0661151			induction
	Q9D7N9	Adipocyte plasma membrane-associated protein	APMAP_MOUSE	Apmap	-0.32608	0.0647347			coexpression
	Q00623	Apolipoprotein A-I	APOA1_MOUSE	Apoa1	-0.0603586	0.237787
	E9Q414	Apolipoprotein B-100	APOB_MOUSE	Apob	-0.279103	0.109372
	Q99J72;Q99J72-4	DNA dC->dU-editing enzyme APOBEC-3;Isoform 4 of DNA dC->dU-editing enzyme APOBEC-3	ABEC3_MOUSE	Apobec3	-0.300955	0.0676123
	Q8VBT6	Apolipoprotein B receptor	APOBR_MOUSE	Apobr	-0.670756	0.0833572
	Q9DCZ4;Q9DCZ4-2;Q9DCZ4-3	MICOS complex subunit Mic26;Isoform 2 of MICOS complex subunit Mic26;Isoform 3 of MICOS complex subunit Mic26	MIC26_MOUSE	Apoo	-0.23641	0.0723041		MitoCarta3.0	literature, APEX_IMS, targetP signal, mito protein domain+, MS/MS++	MIM	Mitochondrial dynamics and surveillance > Cristae formation > MICOS complex
	Q78IK4	MICOS complex subunit Mic27	MIC27_MOUSE	Apool	-0.0428192	0.23125		MitoCarta3.0	literature, yeast mito homolog, mito protein domain+, induction, coexpression++, MS/MS++	MIM	Mitochondrial dynamics and surveillance > Cristae formation > MICOS complex
	Q9DAX9	Amyloid protein-binding protein 2	APBP2_MOUSE	Appbp2	-1.12715	0.0647347			mito protein domain
	Q8K3H0	DCC-interacting protein 13-alpha	DP13A_MOUSE	Appl1	-2.82184	0.0692276
	Q8K3G9	DCC-interacting protein 13-beta	DP13B_MOUSE	Appl2	-0.362069	0.0828397
	P08030	Adenine phosphoribosyltransferase	APT_MOUSE	Aprt	-0.254758	0.0647347			MS/MS
	Q7TQC5;Q7TQC5-3	Aprataxin;Isoform 3 of Aprataxin	APTX_MOUSE	Aptx	0.234232	0.0940972			targetP signal, Rickettsial homolog, mito protein domain
	Q8CFQ3	RNA helicase aquarius	AQR_MOUSE	Aqr	-0.223397	0.0672542
	P04627	Serine/threonine-protein kinase A-Raf	ARAF_MOUSE	Araf	-0.110705	0.194091			mito protein domain
	Q4LDD4;Q4LDD4-2	Arf-GAP with Rho-GAP domain, ANK repeat and PH domain-containing protein 1;Isoform 2 of Arf-GAP with Rho-GAP domain, ANK repeat and PH domain-containing protein 1	ARAP1_MOUSE	Arap1	-0.899354	0.0651187			mito protein domain
	Q8BZ05	Arf-GAP with Rho-GAP domain, ANK repeat and PH domain-containing protein 2	ARAP2_MOUSE	Arap2	-0.0490743	0.257326
	Q5XJY5	Coatomer subunit delta	COPD_MOUSE	Arcn1	-0.257845	0.0713474			targetP signal
	P84078	ADP-ribosylation factor 1	ARF1_MOUSE	Arf1	-0.356318	0.0652454			mito protein domain, induction, coexpression
	P61750	ADP-ribosylation factor 4	ARF4_MOUSE	Arf4	-0.278799	0.0672542			targetP signal, mito protein domain
	P84084	ADP-ribosylation factor 5	ARF5_MOUSE	Arf5	-0.262192	0.0765302		MitoCarta3.0	targetP signal, mito protein domain, coexpression, MS/MS	unknown
	P62331	ADP-ribosylation factor 6	ARF6_MOUSE	Arf6	-0.303064	0.0776431			mito protein domain
	Q9EPJ9	ADP-ribosylation factor GTPase-activating protein 1	ARFG1_MOUSE	Arfgap1	-0.146599	0.143337
	Q99K28;Q99K28-2	ADP-ribosylation factor GTPase-activating protein 2;Isoform 2 of ADP-ribosylation factor GTPase-activating protein 2	ARFG2_MOUSE	Arfgap2	-0.199237	0.0972689
	Q9D8S3	ADP-ribosylation factor GTPase-activating protein 3	ARFG3_MOUSE	Arfgap3	-0.210251	0.176334
[truncated: 6,603 more rows]
