# Supplementary material for: PIM kinase control of CD8 T cell protein synthesis and cell trafficking
Source: eLife. 2025 May 13;13:RP98622. doi: 10.7554/eLife.98622 (PMC12074636; doi:10.7554/eLife.98622)
Supplement: Supplementary file 4. [file elife-98622-supp4.xlsx]

## Sheet: estimated copies per cell
Day 6, IL2 expanded CD8 T cells, Proteomics					ESTIMATED COPY NUMBER PER CELL							AVERAGE COPIES								NUMBER OF PEPTIDES (stripped sequence) USED FOR QUANTIFICATION
black text - proteins quantified by >=2 peptides in at least two bio reps of one condition, grey text - proteins quantified by fewer peptides than this					WT			Pim dKO				WT	Pim dKO		MitoCarta3.0_Annotation					WT			Pim dKO
	Protein_Group_IDs (uniprot)	Protein description	Protein names	Gene names	BR1	BR2	BR3	BR1	BR2	BR3					MitoCarta 3.0 List	Evidence	SubMitoLocalization	MitoPathways		BR1	BR2	BR3	BR1	BR2	BR3
	Q6GQT1	Alpha-2-macroglobulin-P	A2MG_MOUSE	A2m	1393	865	1795	959	981	1560		1351	1166.67			MS/MS				3	3	3	3	3	3
	P58742	Aladin	AAAS_MOUSE	Aaas	54312	41842	33383	26148	32029	31265		43179	29814			mito protein domain				21	20	18	17	19	18
	Q9D2R0	Acetoacetyl-CoA synthetase	AACS_MOUSE	Aacs	75905	77939	73943	52241	64387	67662		75929	61430			mito protein domain, coexpression				24	24	23	23	23	24
	Q8R2R3	Alpha- and gamma-adaptin-binding protein p34	AAGAB_MOUSE	Aagab	8487	9028	7486	4792	6555	7050		8333.67	6132.33							6	6	6	5	6	6
	Q3UHJ0	AP2-associated protein kinase 1	AAK1_MOUSE	Aak1	28551	28695	31178	23635	27044	28670		29474.7	26449.7			mito protein domain, MS/MS				30	30	29	29	30	30
	Q8R0P4	Mth938 domain-containing protein	AAMDC_MOUSE	Aamdc	5046	3989	5882	6099	5213	4747		4972.33	5353			mito protein domain				3	3	3	3	3	3
	J3QN89;Q3TJ22	Angio-associated migratory protein	J3QN89_MOUSE;Q3TJ22_MOUSE	Aamp	9113	9183	8673	6538	7715	7305		8989.67	7186			mito protein domain				7	7	7	7	7	7
	Q9D2V5	Protein AAR2 homolog	AAR2_MOUSE	Aar2	3359	6146	7983	2065	8286	7722		5829.33	6024.33							5	6	6	5	6	5
	Q8BGQ7	Alanine--tRNA ligase, cytoplasmic	SYAC_MOUSE	Aars1	155653	163450	169049	100395	136690	135400		162717	124162			yeast mito homolog, Rickettsial homolog, mito protein domain				52	50	50	52	51	51
	Q14CH7	Alanine--tRNA ligase, mitochondrial	SYAM_MOUSE	Aars2	5688	1218	7856	5462	716	7049		4920.67	4409		MitoCarta3.0	literature, APEX_matrix, targetP signal, yeast mito homolog, Rickettsial homolog, mito protein domain, MS/MS	Matrix	Mitochondrial central dogma > Translation > mt-tRNA synthetases		6	5	6	7	6	6
	Q3THG9	Alanyl-tRNA editing protein Aarsd1	AASD1_MOUSE	Aarsd1	53183	42249	42484	32643	37040	38193		45972	35958.7			Rickettsial homolog, mito protein domain				13	13	13	12	13	13
	Q9CQF6	L-aminoadipate-semialdehyde dehydrogenase-phosphopantetheinyl transferase	ADPPT_MOUSE	Aasdhppt	3823	4118	3518	2514	2915	2609		3819.67	2679.33			Rickettsial homolog, coexpression				5	5	5	4	4	5
	Q9JKX4	Protein AATF	AATF_MOUSE	Aatf	23448	23126	24259	21354	23743	21117		23611	22071.3							18	17	17	18	18	17
	Q91V24	ATP-binding cassette sub-family A member 7	ABCA7_MOUSE	Abca7	19	13	18	15	18	40		16.6667	24.3333			Rickettsial homolog, mito protein domain, induction				1	1	2	2	2	2
	Q9JI39	ATP-binding cassette sub-family B member 10, mitochondrial	ABCBA_MOUSE	Abcb10	640	742	838	1011	686	629		740	775.333		MitoCarta3.0	literature, APEX_matrix, targetP signal+, yeast mito homolog+, Rickettsial homolog, mito protein domain, induction, coexpression, MS/MS+	MIM	Metabolism > Metals and cofactors > Heme synthesis and processing | Small molecule transport > ABC transporters		4	4	4	4	4	4
	P21447	ATP-dependent translocase ABCB1	MDR1A_MOUSE	Abcb1a	9988	9346	9577	7812	8838	8497		9637	8382.33			Rickettsial homolog, mito protein domain, MS/MS				18	19	21	20	21	20
	P06795	ATP-dependent translocase ABCB1	MDR1B_MOUSE	Abcb1b	3277	2975	2060	2766	2744	2581		2770.67	2697			Rickettsial homolog, mito protein domain, coexpression				11	11	9	11	11	11
	Q61102	ATP-binding cassette sub-family B member 7, mitochondrial	ABCB7_MOUSE	Abcb7	16583	15654	15383	12395	14599	14507		15873.3	13833.7		MitoCarta3.0	literature, APEX_matrix, targetP signal, yeast mito homolog+, Rickettsial homolog, mito protein domain, coexpression+, MS/MS+	MIM	Metabolism > Metals and cofactors > Heme synthesis and processing | Metabolism > Metals and cofactors > Fe-S cluster biosynthesis | Metabolism > Metals and cofactors > Molybdenum cofactor synthesis and proteins | Small molecule transport > ABC transporters		22	23	20	23	23	23
	Q9CXJ4	Mitochondrial potassium channel ATP-binding subunit	MITOS_MOUSE	Abcb8	17054	14514	15196	11605	12657	13008		15588	12423.3		MitoCarta3.0	literature, targetP signal, yeast mito homolog, Rickettsial homolog, mito protein domain, coexpression++, MS/MS++	MIM	Small molecule transport > ABC transporters		3	3	3	3	3	3
	Q9JJ59;Q9JJ59-2	ATP-binding cassette sub-family B member 9;Isoform 2 of ATP-binding cassette sub-family B member 9	ABCB9_MOUSE	Abcb9	170	366	339	188	281	278		291.667	249			yeast mito homolog+, Rickettsial homolog, mito protein domain				1	2	2	2	2	2
	O35379	Multidrug resistance-associated protein 1	MRP1_MOUSE	Abcc1	4278	3248	3478	2478	3311	3458		3668	3082.33			Rickettsial homolog, mito protein domain				22	20	21	22	20	22
	E9Q236;E9Q467	ATP-binding cassette, sub-family C (CFTR/MRP), member 4;ATP-binding cassette, sub-family C (CFTR/MRP), member 4	E9Q236_MOUSE;E9Q467_MOUSE	Abcc4	413	392	291	290	325	301		365.333	305.333			Rickettsial homolog, mito protein domain				4	4	4	4	4	4
	P48410	ATP-binding cassette sub-family D member 1	ABCD1_MOUSE	Abcd1	7871	6280	7358	6830	7679	6465		7169.67	6991.33		MitoCarta3.0	targetP signal, Rickettsial homolog, mito protein domain, induction	Membrane	Small molecule transport > ABC transporters		11	11	10	10	11	10
	P55096	ATP-binding cassette sub-family D member 3	ABCD3_MOUSE	Abcd3	2456	2600	2206	1766	2165	2191		2420.67	2040.67		MitoCarta3.0	GFP, targetP signal, Rickettsial homolog, mito protein domain, induction, coexpression	Membrane	Small molecule transport > ABC transporters		7	7	7	7	7	7
	P61222	ATP-binding cassette sub-family E member 1	ABCE1_MOUSE	Abce1	239023	242003	244525	171804	207895	199562		241850	193087			Rickettsial homolog, mito protein domain				31	31	31	30	31	31
	Q6P542	ATP-binding cassette sub-family F member 1	ABCF1_MOUSE	Abcf1	105217	103443	113154	84788	97717	94491		107271	92332			Rickettsial homolog, mito protein domain, coexpression				37	38	33	33	36	38
	Q99LE6	ATP-binding cassette sub-family F member 2	ABCF2_MOUSE	Abcf2	129716	124409	139025	96634	118632	113102		131050	109456			literature, Rickettsial homolog, mito protein domain				33	32	30	29	32	32
	Q8K268	ATP-binding cassette sub-family F member 3	ABCF3_MOUSE	Abcf3	26952	26349	25647	20821	24327	23253		26316	22800.3			Rickettsial homolog, mito protein domain				19	19	19	19	19	19
	Q99P81	ATP-binding cassette sub-family G member 3	ABCG3_MOUSE	Abcg3	363	224	433	314	248	197		340	253			Rickettsial homolog, mito protein domain				2	3	4	4	3	3
	Q6PE15	Mycophenolic acid acyl-glucuronide esterase, mitochondrial	ABHDA_MOUSE	Abhd10	5099	3186	3998	3111	3625	3550		4094.33	3428.67		MitoCarta3.0	literature, APEX_IMS, APEX_matrix, targetP signal+, Rickettsial homolog, mito protein domain, MS/MS++	Matrix	Metabolism > Detoxification > Xenobiotic metabolism		5	4	5	5	5	5
	Q8K4F5	Protein ABHD11	ABHDB_MOUSE	Abhd11	7973	6734	4957	4685	4894	5078		6554.67	4885.67		MitoCarta3.0	literature, APEX_matrix, targetP signal+, yeast mito homolog++, Rickettsial homolog, mito protein domain, coexpression+, MS/MS++	Matrix	Metabolism > Carbohydrate metabolism > TCA-associated		5	5	5	5	5	5
	Q99LR1	Lysophosphatidylserine lipase ABHD12	ABD12_MOUSE	Abhd12	11848	10411	8933	7157	7830	8470		10397.3	7819			yeast mito homolog, Rickettsial homolog, mito protein domain				9	10	8	9	9	10
	Q80UX8	Protein ABHD13	ABHDD_MOUSE	Abhd13	1609	1554	1246	896	1006	1136		1469.67	1012.67			yeast mito homolog, Rickettsial homolog, mito protein domain				3	3	3	3	3	3
	Q8VCR7	Protein ABHD14B	ABHEB_MOUSE	Abhd14b	3046	2446	1762	1985	2000	2121		2418	2035.33							4	4	3	4	4	4
	Q5F2F2	Protein ABHD15	ABH15_MOUSE	Abhd15	311	444	344	290	286	318		366.333	298			yeast mito homolog				1	2	2	2	2	2
	Q9Z1Q2	Phosphatidylserine lipase ABHD16A	ABHGA_MOUSE	Abhd16a	5137	5210	5383	4537	5216	5254		5243.33	5002.33			yeast mito homolog, mito protein domain				8	8	9	9	9	9
	Q99JW1	Alpha/beta hydrolase domain-containing protein 17A	AB17A_MOUSE	Abhd17a	3591	3495	1425	1142	1039	1421		2837	1200.67			yeast mito homolog				2	1	2	2	2	2
	Q7M759	Alpha/beta hydrolase domain-containing protein 17B	AB17B_MOUSE	Abhd17b	4333	3770	2636	1968	2417	2519		3579.67	2301.33			yeast mito homolog				3	3	3	3	3	3
	Q9DBL9;Q9DBL9-2	1-acylglycerol-3-phosphate O-acyltransferase ABHD5;Isoform 2 of 1-acylglycerol-3-phosphate O-acyltransferase ABHD5	ABHD5_MOUSE	Abhd5	930	1240	1249	560	973	1017		1139.67	850			mito protein domain, induction, coexpression				1	2	2	2	2	2
	Q8R2Y0;Q8R2Y0-2	Monoacylglycerol lipase ABHD6;Isoform 2 of Monoacylglycerol lipase ABHD6	ABHD6_MOUSE	Abhd6	2165	1700	1288	925	1068	1529		1717.67	1174			Rickettsial homolog, mito protein domain, MS/MS				6	4	5	4	3	6
	Q8CBW3;Q8CBW3-2;Q8CBW3-3;Q8CBW3-4	Abl interactor 1;Isoform 2 of Abl interactor 1;Isoform 3 of Abl interactor 1;Isoform 4 of Abl interactor 1	ABI1_MOUSE	Abi1	36362	37809	34658	32043	33495	35779		36276.3	33772.3			mito protein domain				19	19	19	19	18	18
	Q8BYZ1	ABI gene family member 3	ABI3_MOUSE	Abi3	32543	37846	32210	23672	29129	30311		34199.7	27704			mito protein domain				13	13	13	13	13	13
	Q80ZQ9	Protein Abitram	ABITM_MOUSE	Abitram	28290	26628	26570	20550	24775	23313		27162.7	22879.3			mito protein domain+				9	9	8	8	9	9
	Q8K4G5;Q8K4G5-2;Q8K4G5-3	Actin-binding LIM protein 1;Isoform 2 of Actin-binding LIM protein 1;Isoform 3 of Actin-binding LIM protein 1	ABLM1_MOUSE	Ablim1	19104	19762	19847	15927	18044	18073		19571	17348							22	22	21	21	21	22
	Q5SSL4;Q5SSL4-2	Active breakpoint cluster region-related protein;Isoform 2 of Active breakpoint cluster region-related protein	ABR_MOUSE	Abr	31006	31385	35727	20359	28949	25912		32706	25073.3			mito protein domain				28	28	27	25	26	27
	Q4KML4	Costars family protein ABRACL	ABRAL_MOUSE	Abracl	1318176	656574	549234	405840	467335	410589		841328	427921							3	3	3	3	3	3
	Q8BPZ8	BRCA1-A complex subunit Abraxas 1	ABRX1_MOUSE	Abraxas1	2625	9332	2764	2190	1679	2451		4907	2106.67							4	5	5	5	4	5
	Q3TCJ1	BRISC complex subunit Abraxas 2	ABRX2_MOUSE	Abraxas2	10519	10429	11085	8848	9907	10309		10677.7	9688							11	11	11	11	11	11
	Q9QYL7	Activator of basal transcription 1	ABT1_MOUSE	Abt1	13802	13808	17541	13012	15670	15417		15050.3	14699.7							8	8	8	8	8	8
	Q921H8	3-ketoacyl-CoA thiolase A, peroxisomal	THIKA_MOUSE	Acaa1a	92591	84280	91665	75691	84001	82674		89512	80788.7		MitoCarta3.0	targetP signal, yeast mito homolog+, Rickettsial homolog, mito protein domain, coexpression	Matrix	Metabolism > Lipid metabolism > Fatty acid oxidation		19	19	18	19	18	19
	Q8BWT1	3-ketoacyl-CoA thiolase, mitochondrial	THIM_MOUSE	Acaa2	117503	116924	119344	111018	110435	102704		117924	108052		MitoCarta3.0	literature, APEX_matrix, targetP signal, Rickettsial homolog, mito protein domain, induction, coexpression+, MS/MS++	Matrix	Metabolism > Carbohydrate metabolism > Ketone metabolism | Metabolism > Lipid metabolism > Fatty acid oxidation | Metabolism > Amino acid metabolism > Lysine metabolism		23	24	22	22	22	22
	Q5SWU9;Q5SWU9-2	Acetyl-CoA carboxylase 1;Isoform 2 of Acetyl-CoA carboxylase 1	ACACA_MOUSE	Acaca	39245	37128	36665	28159	32680	32344		37679.3	31061		MitoCarta3.0	yeast mito homolog, Rickettsial homolog, mito protein domain, coexpression	Matrix	Metabolism > Lipid metabolism > Type II fatty acid synthesis | Metabolism > Vitamin metabolism > Biotin utilizing proteins		92	91	90	91	92	92
	Q8K370	Acyl-CoA dehydrogenase family member 10	ACD10_MOUSE	Acad10	135	96	88	109	83	69		106.333	87		MitoCarta3.0	APEX_matrix, targetP signal+, mito protein domain+, coexpression, MS/MS++	Matrix	Metabolism > Lipid metabolism > Fatty acid oxidation		3	2	2	3	2	2
	Q80XL6	Acyl-CoA dehydrogenase family member 11	ACD11_MOUSE	Acad11	468	459	374	262	401	402		433.667	355		MitoCarta3.0	mito protein domain+, induction, coexpression	MIM	Metabolism > Lipid metabolism > Fatty acid oxidation		3	3	3	2	3	3
	Q9D7B6	Isobutyryl-CoA dehydrogenase, mitochondrial	ACAD8_MOUSE	Acad8	4897	4551	3554	4935	4843	4770		4334	4849.33		MitoCarta3.0	literature, APEX_matrix, targetP signal+, mito protein domain+, coexpression, MS/MS++	Matrix	Metabolism > Amino acid metabolism > Branched-chain amino acid metabolism		7	7	6	7	7	7
	Q8JZN5	Complex I assembly factor ACAD9, mitochondrial	ACAD9_MOUSE	Acad9	35305	32840	32886	29726	31311	32418		33677	31151.7		MitoCarta3.0	literature, APEX_matrix, targetP signal+, mito protein domain+, MS/MS++	MIM	OXPHOS > Complex I > CI assembly factors | OXPHOS > OXPHOS assembly factors		28	30	27	28	27	29
	P51174	Long-chain specific acyl-CoA dehydrogenase, mitochondrial	ACADL_MOUSE	Acadl	217438	213544	237169	168042	192368	181298		222717	180569		MitoCarta3.0	literature, targetP signal+, mito protein domain+, induction, coexpression+, MS/MS++	MIM	Metabolism > Lipid metabolism > Fatty acid oxidation		23	23	22	22	21	22
	P45952	Medium-chain specific acyl-CoA dehydrogenase, mitochondrial	ACADM_MOUSE	Acadm	23405	23748	22052	22905	22546	23328		23068.3	22926.3		MitoCarta3.0	literature, APEX_matrix, targetP signal, mito protein domain+, induction, coexpression++, MS/MS++	Matrix	Metabolism > Lipid metabolism > Fatty acid oxidation		12	12	11	12	11	12
	Q07417	Short-chain specific acyl-CoA dehydrogenase, mitochondrial	ACADS_MOUSE	Acads	95908	93526	102913	86625	93709	90875		97449	90403		MitoCarta3.0	literature, APEX_matrix, targetP signal+, mito protein domain+, induction, coexpression++, MS/MS++	Matrix	Metabolism > Lipid metabolism > Fatty acid oxidation		18	18	18	17	17	18
	Q9DBL1	Short/branched chain specific acyl-CoA dehydrogenase, mitochondrial	ACDSB_MOUSE	Acadsb	9375	13779	6109	7125	10830	8703		9754.33	8886		MitoCarta3.0	literature, APEX_matrix, targetP signal, mito protein domain+, induction, coexpression, MS/MS++	Matrix	Metabolism > Lipid metabolism > Fatty acid oxidation | Metabolism > Amino acid metabolism > Branched-chain amino acid metabolism		9	8	8	8	9	8
	P50544	Very long-chain specific acyl-CoA dehydrogenase, mitochondrial	ACADV_MOUSE	Acadvl	60837	64978	68520	55551	64993	59635		64778.3	60059.7		MitoCarta3.0	literature, APEX_matrix, targetP signal+, mito protein domain+, coexpression+, MS/MS++	MIM	Metabolism > Lipid metabolism > Fatty acid oxidation		35	37	34	33	36	35
	Q8K2H4	Arf-GAP with coiled-coil, ANK repeat and PH domain-containing protein 1	ACAP1_MOUSE	Acap1	50294	47736	47142	36341	41757	40535		48390.7	39544.3			Rickettsial homolog, mito protein domain				37	36	34	34	35	35
	Q6ZQK5	Arf-GAP with coiled-coil, ANK repeat and PH domain-containing protein 2	ACAP2_MOUSE	Acap2	7552	6803	7346	5457	6305	5773		7233.67	5845			Rickettsial homolog, mito protein domain				16	15	16	16	16	15
	Q8QZT1	Acetyl-CoA acetyltransferase, mitochondrial	THIL_MOUSE	Acat1	192007	198539	195224	147273	179010	176130		195257	167471		MitoCarta3.0	literature, APEX_matrix, targetP signal, Rickettsial homolog, mito protein domain, induction, coexpression+, MS/MS++	Matrix	Metabolism > Carbohydrate metabolism > Ketone metabolism | Metabolism > Lipid metabolism > Fatty acid oxidation | Metabolism > Amino acid metabolism > Branched-chain amino acid metabolism | Metabolism > Amino acid metabolism > Lysine metabolism		23	23	21	20	21	21
	Q8CAY6	Acetyl-CoA acetyltransferase, cytosolic	THIC_MOUSE	Acat2	88008	81149	82342	60417	72093	72287		83833	68265.7			Rickettsial homolog, mito protein domain, coexpression				14	15	14	14	15	14
	Q8BMP6	Golgi resident protein GCP60	GCP60_MOUSE	Acbd3	23280	42674	28401	20315	25897	40401		31451.7	28871			mito protein domain				14	14	14	14	14	14
	Q5XG73;Q5XG73-2;Q5XG73-3	Acyl-CoA-binding domain-containing protein 5;Isoform 2 of Acyl-CoA-binding domain-containing protein 5;Isoform 3 of Acyl-CoA-binding domain-containing protein 5	ACBD5_MOUSE	Acbd5	503	546	577	411	678	500		542	529.667			mito protein domain				2	2	2	2	2	2
	Q9D061	Acyl-CoA-binding domain-containing protein 6	ACBD6_MOUSE	Acbd6	4742	4497	4570	2931	3667	3192		4603	3263.33			Rickettsial homolog, mito protein domain				4	4	4	4	4	4
	Q5EE38	Adrenocortical dysplasia protein	ACD_MOUSE	Acd	6547	8699	5248	4721	5492	5412		6831.33	5208.33							7	7	7	7	7	7
	Q9JIX8;Q9JIX8-4	Apoptotic chromatin condensation inducer in the nucleus;Isoform 4 of Apoptotic chromatin condensation inducer in the nucleus	ACINU_MOUSE	Acin1	49078	50884	51334	43959	47377	47518		50432	46284.7			mito protein domain				48	50	48	48	50	47
	Q91V92	ATP-citrate synthase	ACLY_MOUSE	Acly	219979	218949	210363	145387	181914	182316		216430	169872		MitoCarta3.0	APEX_matrix, yeast mito homolog+, Rickettsial homolog, mito protein domain, coexpression	Matrix	Metabolism > Carbohydrate metabolism > TCA-associated		60	60	57	59	58	58
	P28271	Cytoplasmic aconitate hydratase	ACOC_MOUSE	Aco1	41461	41088	42013	26971	34515	36682		41520.7	32722.7			yeast mito homolog, Rickettsial homolog, mito protein domain, coexpression				30	29	29	29	28	30
	Q99KI0	Aconitate hydratase, mitochondrial	ACON_MOUSE	Aco2	324329	323393	358152	287436	317310	300734		335291	301827		MitoCarta3.0	literature, APEX_matrix, targetP signal, yeast mito homolog, Rickettsial homolog, mito protein domain, induction, coexpression++, MS/MS++	Matrix	Metabolism > Carbohydrate metabolism > TCA cycle | Metabolism > Metals and cofactors > Fe-S-containing proteins		44	44	40	41	41	43
	Q8VHQ9	Acyl-coenzyme A thioesterase 11	ACO11_MOUSE	Acot11	1703	1450	1426	777	1028	1236		1526.33	1013.67		MitoCarta3.0	literature,targetP signal, mito protein domain, coexpression	Matrix	Metabolism > Lipid metabolism > Fatty acid oxidation		3	3	4	4	4	4
	Q9CQR4	Acyl-coenzyme A thioesterase 13	ACO13_MOUSE	Acot13	43342	44060	35334	31495	34809	39293		40912	35199		MitoCarta3.0	mito protein domain, induction, coexpression, MS/MS++	Matrix	Metabolism > Lipid metabolism		6	6	4	5	5	6
	Q9QYR9	Acyl-coenzyme A thioesterase 2, mitochondrial	ACOT2_MOUSE	Acot2	9621	10433	6865	6065	7536	7341		8973	6980.67		MitoCarta3.0	literature, targetP signal, mito protein domain, induction, coexpression, MS/MS++	Matrix	Metabolism > Lipid metabolism		10	9	10	11	11	10
	Q91V12-2	Isoform A of Cytosolic acyl coenzyme A thioester hydrolase	BACH_MOUSE	Acot7	505296	489506	490312	327611	402117	410460		495038	380063		MitoCarta3.0	targetP signal, mito protein domain, induction	Matrix	Metabolism > Lipid metabolism		20	21	19	19	20	19
	P58137	Acyl-coenzyme A thioesterase 8	ACOT8_MOUSE	Acot8	18550	19367	20170	13983	19158	16695		19362.3	16612			yeast mito homolog				12	12	13	12	13	13
	Q9R0X4	Acyl-coenzyme A thioesterase 9, mitochondrial	ACOT9_MOUSE	Acot9	30674	26593	24871	21860	22019	22645		27379.3	22174.7		MitoCarta3.0	literature, targetP signal, MS/MS++	MIM	Metabolism > Lipid metabolism		21	24	20	22	23	23
	Q9EPL9	Peroxisomal acyl-coenzyme A oxidase 3	ACOX3_MOUSE	Acox3	1812	1386	1908	1577	2093	2009		1702	1893			mito protein domain+, induction				9	7	10	9	9	9
	Q9D358	Low molecular weight phosphotyrosine protein phosphatase	PPAC_MOUSE	Acp1	229977	213715	211333	160184	184051	187219		218342	177151			MS/MS				7	7	7	7	7	7
	Q8CE08;Q8CE08-2	Prostatic acid phosphatase;Isoform 2 of Prostatic acid phosphatase	PPAP_MOUSE	Acp3	8990	7543	5200	780	2618	3240		7244.33	2212.67			mito protein domain				6	6	6	5	6	6
	Q05117	Tartrate-resistant acid phosphatase type 5	PPA5_MOUSE	Acp5	17402	20695	15344	9633	13398	15525		17813.7	12852							8	8	7	6	7	7
	Q8BP40	Lysophosphatidic acid phosphatase type 6	PPA6_MOUSE	Acp6	4766	3457	3575	3816	3918	3688		3932.67	3807.33		MitoCarta3.0	literature, APEX_IMS, targetP signal, mito protein domain, MS/MS++	IMS	Metabolism > Lipid metabolism > Phospholipid metabolism		5	5	5	6	6	6
	Q8VCW8	Medium-chain acyl-CoA ligase ACSF2, mitochondrial	ACSF2_MOUSE	Acsf2	15006	15367	13819	11231	16220	15249		14730.7	14233.3		MitoCarta3.0	APEX_matrix, targetP signal, Rickettsial homolog, mito protein domain, MS/MS++	Matrix	Metabolism > Lipid metabolism > Fatty acid oxidation		17	20	19	19	19	20
	Q3URE1	Malonate--CoA ligase ACSF3, mitochondrial	ACSF3_MOUSE	Acsf3	5239	5277	5145	4611	4911	4589		5220.33	4703.67		MitoCarta3.0	APEX_matrix, targetP signal+, Rickettsial homolog, mito protein domain, coexpression+, MS/MS++	Matrix	Metabolism > Lipid metabolism > Type II fatty acid synthesis		10	13	13	13	13	13
	P41216	Long-chain-fatty-acid--CoA ligase 1	ACSL1_MOUSE	Acsl1	2205	1919	2288	1524	1921	1985		2137.33	1810		MitoCarta3.0	yeast mito homolog, Rickettsial homolog, mito protein domain, coexpression	MOM	Metabolism > Lipid metabolism > Fatty acid oxidation		8	8	8	7	8	8
	Q9CZW4	Long-chain-fatty-acid--CoA ligase 3	ACSL3_MOUSE	Acsl3	4951	5097	5467	3534	4761	4332		5171.67	4209			Rickettsial homolog, mito protein domain				13	13	13	13	13	13
	Q9QUJ7;Q9QUJ7-2	Long-chain-fatty-acid--CoA ligase 4;Isoform Short of Long-chain-fatty-acid--CoA ligase 4	ACSL4_MOUSE	Acsl4	131290	130644	122521	73674	101472	96403		128152	90516.3		mito-interacting	GFP, Rickettsial homolog, mito protein domain				34	34	34	34	34	34
	Q8JZR0	Long-chain-fatty-acid--CoA ligase 5	ACSL5_MOUSE	Acsl5	77359	75338	69768	55899	62132	62920		74155	60317			yeast mito homolog, Rickettsial homolog, mito protein domain, induction				28	30	27	27	27	28
	Q99NB1	Acetyl-coenzyme A synthetase 2-like, mitochondrial	ACS2L_MOUSE	Acss1	3468	2107	3640	4409	4324	3649		3071.67	4127.33		MitoCarta3.0	literature, APEX_matrix, targetP signal, mito protein domain, MS/MS++	MIM	Metabolism > Lipid metabolism > Fatty acid oxidation		13	10	10	17	15	14
	Q9QXG4	Acetyl-coenzyme A synthetase, cytoplasmic	ACSA_MOUSE	Acss2	1835	1804	2738	903	1775	1891		2125.67	1523			mito protein domain, induction, coexpression				5	5	6	5	6	6
	P68134	Actin, alpha skeletal muscle	ACTS_MOUSE	Acta1	282903	240848	207294	165228	172977	170103		243682	169436			MS/MS				2	2	2	2	2	2
	P60710	Actin, cytoplasmic 1	ACTB_MOUSE	Actb	27050834	27331064	23277255	15057052	19257102	18889488		2.58864e+07	1.77345e+07							19	19	19	18	19	19
	Q8BFZ3	Beta-actin-like protein 2	ACTBL_MOUSE	Actbl2	312491	282094	300630	196488	262249	282010		298405	246916							8	8	8	8	8	8
	P68033	Actin, alpha cardiac muscle 1	ACTC_MOUSE	Actc1	71653004	78878363	72921484	49226251	62114032	62681020		7.44843e+07	58007101			coexpression				34	34	30	30	33	31
	P63260	Actin, cytoplasmic 2	ACTG_MOUSE	Actg1	1944867	3021471	2427709	1468085	2066047	1627016		2.46468e+06	1.72038e+06							2	2	2	2	2	2
	Q9Z2N8	Actin-like protein 6A	ACL6A_MOUSE	Actl6a	104903	101562	104173	95949	99347	93539		103546	96278.3							19	18	19	19	19	19
	Q7TPR4	Alpha-actinin-1	ACTN1_MOUSE	Actn1	239199	213222	233545	170554	187941	185209		228655	181235			mito protein domain				52	50	52	50	51	52
	P57780	Alpha-actinin-4	ACTN4_MOUSE	Actn4	349171	342486	374827	259668	303644	300020		355495	287777			mito protein domain				48	51	47	48	46	47
	Q9QZB7	Actin-related protein 10	ARP10_MOUSE	Actr10	24477	22785	21559	15905	19681	17794		22940.3	17793.3							17	16	18	17	18	16
	P61164	Alpha-centractin	ACTZ_MOUSE	Actr1a	61171	57765	56456	48312	51577	58782		58464	52890.3							9	9	9	8	8	8
	Q8R5C5	Beta-centractin	ACTY_MOUSE	Actr1b	88722	88384	83752	64060	74091	71379		86952.7	69843.3							15	15	14	15	15	15
	P61161	Actin-related protein 2	ARP2_MOUSE	Actr2	715287	701376	758238	584992	639030	642347		724967	622123			yeast mito homolog				18	19	18	18	18	19
	Q99JY9	Actin-related protein 3	ARP3_MOUSE	Actr3	1170505	1377809	1228085	949676	1070000	1100778		1.2588e+06	1.04015e+06							26	26	24	25	24	25
	Q80US4	Actin-related protein 5	ARP5_MOUSE	Actr5	8748	10027	9658	6927	9698	8093		9477.67	8239.33							12	12	13	12	12	12
	Q9D864	Actin-related protein 6	ARP6_MOUSE	Actr6	1933	1861	1526	1343	1506	1599		1773.33	1482.67			induction				3	2	3	3	3	3
	Q8R2S9	Actin-related protein 8	ARP8_MOUSE	Actr8	3260	2727	2625	2023	2476	2247		2870.67	2248.67							11	10	10	11	10	10
	Q61288	Serine/threonine-protein kinase receptor R3	ACVL1_MOUSE	Acvrl1	10259	11416	9293	4015	9255	8346		10322.7	7205.33			targetP signal, mito protein domain				6	6	6	2	6	6
	Q99JW2	Aminoacylase-1	ACY1_MOUSE	Acy1	4985	4732	4788	3478	4173	3816		4835	3822.33			Rickettsial homolog				6	8	8	7	8	7
	P56376	Acylphosphatase-1	ACYP1_MOUSE	Acyp1	50184	41125	55080	41766	51292	45545		48796.3	46201			MS/MS++				6	7	6	6	6	7
	P03958	Adenosine deaminase	ADA_MOUSE	Ada	49297	48178	50867	41283	44673	45139		49447.3	43698.3			MS/MS				19	19	19	18	19	19
	O35598	Disintegrin and metalloproteinase domain-containing protein 10	ADA10_MOUSE	Adam10	12042	12286	13346	10317	11653	10822		12558	10930.7							22	22	22	22	22	21
	Q9Z0F8;Q9Z0F8-2	Disintegrin and metalloproteinase domain-containing protein 17;Isoform Short of Disintegrin and metalloproteinase domain-containing protein 17	ADA17_MOUSE	Adam17	1936	1885	1857	1225	1545	1426		1892.67	1398.67							7	7	7	7	7	7
	O35674	Disintegrin and metalloproteinase domain-containing protein 19	ADA19_MOUSE	Adam19	3176	3261	3611	2162	2881	2756		3349.33	2599.67							12	12	12	11	11	12
	Q05910	Disintegrin and metalloproteinase domain-containing protein 8	ADAM8_MOUSE	Adam8	9562	10356	10349	3077	6315	6982		10089	5458							14	14	14	14	14	14
	E9PY16	ArfGAP with dual PH domains 1	E9PY16_MOUSE	Adap1	16209	13315	12268	9791	11817	12068		13930.7	11225.3			mito protein domain				9	9	9	9	9	9
	Q99MU3-2	Isoform 2 of Double-stranded RNA-specific adenosine deaminase	DSRAD_MOUSE	Adar	8603	7559	7623	5989	6626	6562		7928.33	6392.33			mito protein domain				25	25	24	24	23	25
	Q9JHI2;Q9JHI2-2;Q9JHI2-3	tRNA-specific adenosine deaminase 1;Isoform 2 of tRNA-specific adenosine deaminase 1;Isoform 3 of tRNA-specific adenosine deaminase 1	ADAT1_MOUSE	Adat1	1152	1011	763	862	969	820		975.333	883.667							4	4	4	4	4	4
	Q6P6J0	tRNA-specific adenosine deaminase 2	ADAT2_MOUSE	Adat2	189914	168594	14741	6563	105226	4337		124416	38708.7			Rickettsial homolog				3	3	3	3	3	3
	Q9D0L4	AarF domain-containing protein kinase 1	ADCK1_MOUSE	Adck1	3130	1638	1471	1013	1286	1292		2079.67	1197		MitoCarta3.0	yeast mito homolog+, Rickettsial homolog, mito protein domain, MS/MS	unknown			7	5	6	5	6	7
	Q80V03;Q80V03-2	Uncharacterized aarF domain-containing protein kinase 5;Isoform 2 of Uncharacterized aarF domain-containing protein kinase 5	ADCK5_MOUSE	Adck5	90	113	54	52	110	67		85.6667	76.3333		MitoCarta3.0	targetP signal, yeast mito homolog+, Rickettsial homolog, mito protein domain, induction, coexpression, MS/MS	unknown			1	2	1	1	2	2
	Q8VHH7	Adenylate cyclase type 3	ADCY3_MOUSE	Adcy3	192	383	230	76	85	97		268.333	86			mito protein domain, coexpression				3	3	3	3	3	3
	P51829	Adenylate cyclase type 7	ADCY7_MOUSE	Adcy7	3185	2716	2440	1446	1919	2338		2780.33	1901			mito protein domain				13	12	13	13	13	13
	Q9QYC0	Alpha-adducin	ADDA_MOUSE	Add1	33974	34443	33082	31238	31968	31340		33833	31515.3			Rickettsial homolog				30	28	27	30	30	29
	Q9QYB5-2	Isoform 1 of Gamma-adducin	ADDG_MOUSE	Add3	27011	25556	29784	27749	27621	26378		27450.3	27249.3			Rickettsial homolog				24	26	25	22	26	28
	Q9Z0M6;Q9Z0M6-3	Adhesion G protein-coupled receptor E5;Isoform 3 of Adhesion G protein-coupled receptor E5	AGRE5_MOUSE	Adgre5	4833	5556	4632	7297	5910	5039		5007	6082							14	15	16	17	16	15
	P28474	Alcohol dehydrogenase class-3	ADHX_MOUSE	Adh5	223356	222664	242975	197038	221309	202238		229665	206862			yeast mito homolog, mito protein domain, coexpression				22	22	22	22	22	22
	Q99JT9	1,2-dihydroxy-3-keto-5-methylthiopentene dioxygenase	MTND_MOUSE	Adi1	13118	14438	14103	12548	13083	10333		13886.3	11988							5	5	5	5	5	5
	P55264	Adenosine kinase	ADK_MOUSE	Adk	49532	44986	49847	43565	46997	42083		48121.7	44215			coexpression				18	18	17	16	16	17
	Q9Z103	Activity-dependent neuroprotector homeobox protein	ADNP_MOUSE	Adnp	14914	16029	17165	15160	16272	15934		16036	15788.7							34	36	36	36	36	36
	Q8CHC8	Activity-dependent neuroprotector homeobox protein 2	ADNP2_MOUSE	Adnp2	368	350	318	315	346	311		345.333	324							2	2	2	2	2	2
	Q6PDY2	2-aminoethanethiol dioxygenase	AEDO_MOUSE	Ado	12030	13064	15326	12734	13135	12749		13473.3	12872.7			targetP signal, MS/MS				7	7	7	7	7	7
	Q8VDL4;Q8VDL4-3	ADP-dependent glucokinase;Isoform 3 of ADP-dependent glucokinase	ADPGK_MOUSE	Adpgk	21646	20248	21358	15902	17873	17421		21084	17065.3							15	16	15	13	15	16
	P54923	[Protein ADP-ribosylarginine] hydrolase	ADPRH_MOUSE	Adprh	69336	74410	77775	72029	73748	72861		73840.3	72879.3			mito protein domain				15	16	14	15	15	15
	Q99KS6;Q99KS6-2	Manganese-dependent ADP-ribose/CDP-alcohol diphosphatase;Isoform 2 of Manganese-dependent ADP-ribose/CDP-alcohol diphosphatase	ADPRM_MOUSE	Adprm	1082	1235	1058	740	868	807		1125	805							2	3	3	3	3	3
	Q8CG72	ADP-ribose glycohydrolase ARH3	ADPRS_MOUSE	Adprs	14675	15659	17533	14384	15654	15261		15955.7	15099.7			targetP signal, mito protein domain				8	8	8	8	8	8
	Q9JKV1	Proteasomal ubiquitin receptor ADRM1	ADRM1_MOUSE	Adrm1	90289	100570	102331	75584	87288	86607		97730	83159.7							10	11	10	11	10	11
	P54822	Adenylosuccinate lyase	PUR8_MOUSE	Adsl	199031	168460	157097	128577	144736	146656		174863	139990			Rickettsial homolog, mito protein domain, induction, coexpression				29	28	26	27	26	29
	P28650;P28650-2	Adenylosuccinate synthetase isozyme 1;Isoform 2 of Adenylosuccinate synthetase isozyme 1	PURA1_MOUSE	Adss1	701	826	371	335	415	457		632.667	402.333			induction				1	2	1	2	2	2
	P46664	Adenylosuccinate synthetase isozyme 2	PURA2_MOUSE	Adss2	197406	197083	232299	198989	207750	195940		208929	200893			induction				26	26	23	23	23	25
	Q9Z248;Q9Z248-2	Zinc finger protein AEBP2;Isoform 2 of Zinc finger protein AEBP2	AEBP2_MOUSE	Aebp2	24075	24550	28132	20345	23869	24354		25585.7	22856							10	12	12	12	12	12
	Q9CZI9	Apoptosis-enhancing nuclease	AEN_MOUSE	Aen	11011	10156	10911	6206	8245	8255		10692.7	7568.67			Rickettsial homolog, mito protein domain				7	7	6	7	6	6
	Q9QZQ1;Q9QZQ1-2	Afadin;Isoform 1 of Afadin	AFAD_MOUSE	Afdn	202	128	66	455	89	110		132	218			mito protein domain				3	3	2	3	2	3
	Q920A7	AFG3-like protein 1	AFG31_MOUSE	Afg3l1	10352	8763	9051	7159	7822	7289		9388.67	7423.33		MitoCarta3.0	literature, targetP signal, yeast mito homolog, Rickettsial homolog, mito protein domain+, coexpression, MS/MS+	MIM	Protein import, sorting and homeostasis > Protein homeostasis > Proteases		16	15	15	15	15	15
	Q8JZQ2	AFG3-like protein 2	AFG32_MOUSE	Afg3l2	31009	32877	34372	27532	28217	26821		32752.7	27523.3		MitoCarta3.0	literature, APEX_matrix, targetP signal, yeast mito homolog, Rickettsial homolog, mito protein domain+, induction, coexpression++, MS/MS++	MIM	Protein import, sorting and homeostasis > Protein homeostasis > Proteases		29	31	30	30	29	30
	Q8K4H1	Kynurenine formamidase	KFA_MOUSE	Afmid	942	945	936	802	871	867		941	846.667			mito protein domain, coexpression				2	2	2	2	2	2
	Q80WT5;Q80WT5-2	Aftiphilin;Isoform 2 of Aftiphilin	AFTIN_MOUSE	Aftph	3150	2901	12988	10071	11119	10661		6346.33	10617							14	15	16	15	15	14
	Q64191	N(4)-(beta-N-acetylglucosaminyl)-L-asparaginase	ASPG_MOUSE	Aga	1955	2245	1936	1710	1783	1583		2045.33	1692							3	3	3	3	3	3
	Q3UHD9;Q3UHD9-2	Arf-GAP with GTPase, ANK repeat and PH domain-containing protein 2;Isoform 2 of Arf-GAP with GTPase, ANK repeat and PH domain-containing protein 2	AGAP2_MOUSE	Agap2	10553	10056	9824	7613	9415	8929		10144.3	8652.33			targetP signal, mito protein domain				17	17	17	17	17	17
	Q8VHH5	Arf-GAP with GTPase, ANK repeat and PH domain-containing protein 3	AGAP3_MOUSE	Agap3	869	2801	650	745	658	725		1440	709.333							6	6	6	6	6	6
	Q8K2K6;Q8K2K6-1;Q8K2K6-3	Arf-GAP domain and FG repeat-containing protein 1;Isoform 1 of Arf-GAP domain and FG repeat-containing protein 1;Isoform 3 of Arf-GAP domain and FG repeat-containing protein 1	AGFG1_MOUSE	Agfg1	33678	38632	32476	29077	32434	33221		34928.7	31577.3							13	14	13	14	14	14
	Q80WC7;Q80WC7-2	Arf-GAP domain and FG repeat-containing protein 2;Isoform 2 of Arf-GAP domain and FG repeat-containing protein 2	AGFG2_MOUSE	Agfg2	9172	9483	9374	6876	8135	8238		9343	7749.67							9	9	9	9	9	9
	Q7TN31	Angiogenic factor with G patch and FHA domains 1	AGGF1_MOUSE	Aggf1	444	403	402	358	452	406		416.333	405.333			mito protein domain, induction				1	2	2	2	2	2
	Q9ESW4	Acylglycerol kinase, mitochondrial	AGK_MOUSE	Agk	25327	25028	22063	19280	21522	21690		24139.3	20830.7		MitoCarta3.0	literature, APEX_IMS, mito protein domain	MIM	Protein import, sorting and homeostasis > Protein import and sorting > TIM22 carrier pathway | Metabolism > Lipid metabolism > Phospholipid metabolism		14	14	14	14	14	14
	F8VPN4	Amylo-1,6-glucosidase, 4-alpha-glucanotransferase	F8VPN4_MOUSE	Agl	733	666	520	229	448	441		639.667	372.667			yeast mito homolog, mito protein domain, induction				7	7	7	5	7	7
	Q8CJG0	Protein argonaute-2	AGO2_MOUSE	Ago2	36598	33701	31906	24635	28297	27381		34068.3	26771							38	36	37	37	36	36
	O35083	1-acyl-sn-glycerol-3-phosphate acyltransferase alpha	PLCA_MOUSE	Agpat1	4080	4089	4267	3328	4362	4148		4145.33	3946			Rickettsial homolog, mito protein domain				4	4	4	4	4	4
	Q9D517	1-acyl-sn-glycerol-3-phosphate acyltransferase gamma	PLCC_MOUSE	Agpat3	58392	53786	53869	36739	44414	41931		55349	41028			mito protein domain, induction, coexpression				17	16	16	17	17	17
	Q8K4X7	1-acyl-sn-glycerol-3-phosphate acyltransferase delta	PLCD_MOUSE	Agpat4	5685	3615	17696	3012	3816	3973		8998.67	3600.33		MitoCarta3.0	literature,mito protein domain, induction	MOM	Metabolism > Lipid metabolism > Cardiolipin synthesis | Metabolism > Lipid metabolism > Phospholipid metabolism		6	6	6	6	6	6
	Q9D1E8	1-acyl-sn-glycerol-3-phosphate acyltransferase epsilon	PLCE_MOUSE	Agpat5	4001	4232	3529	2751	3054	3591		3920.67	3132		MitoCarta3.0	literature, mito protein domain, induction, MS/MS	MOM	Metabolism > Lipid metabolism > Cardiolipin synthesis | Metabolism > Lipid metabolism > Phospholipid metabolism		5	4	4	4	5	5
	Q8C0I1	Alkyldihydroxyacetonephosphate synthase, peroxisomal	ADAS_MOUSE	Agps	53865	52152	53845	41325	48109	46056		53287.3	45163.3			yeast mito homolog+, mito protein domain				27	30	28	28	28	28
	Q8CJF7	Protein ELYS	ELYS_MOUSE	Ahctf1	11270	10334	10730	8931	10540	10029		10778	9833.33							56	56	51	51	54	56
	P50247	Adenosylhomocysteinase	SAHH_MOUSE	Ahcy	693745	662300	659621	527141	613507	593626		671889	578091			mito protein domain+				29	29	28	27	27	30
	Q80SW1	S-adenosylhomocysteine hydrolase-like protein 1	SAHH2_MOUSE	Ahcyl1	5615	5870	4146	5557	5385	4425		5210.33	5122.33		MitoCarta3.0	mito protein domain+, induction	MOM	Mitochondrial dynamics and surveillance > Organelle contact sites		6	6	5	6	6	6
	Q68FL4	Putative adenosylhomocysteinase 3	SAHH3_MOUSE	Ahcyl2	26028	26641	29412	25598	26157	23965		27360.3	25240			mito protein domain				16	17	17	17	17	17
	Q6PAL7	AT-hook DNA-binding motif-containing protein 1	AHDC1_MOUSE	Ahdc1	149	206	191	145	168	159		182	157.333							3	3	3	3	3	3
	E9Q616	AHNAK nucleoprotein (desmoyokin)	E9Q616_MOUSE	Ahnak	153241	168057	166362	115141	141896	137809		162553	131615			mito protein domain				288	296	254	255	261	271
	E9PYB0;F7CVJ5;F7DBB3	AHNAK nucleoprotein 2 (Fragment)	E9PYB0_MOUSE;F7CVJ5_MOUSE;F7DBB3_MOUSE	Ahnak2	373	437	314	91	226	249		374.667	188.667							2	2	2	2	2	2
	Q8BK64	Activator of 90 kDa heat shock protein ATPase homolog 1	AHSA1_MOUSE	Ahsa1	311239	286734	301592	253162	272676	273417		299855	266418							27	27	26	25	24	26
	Q8N9S3;Q8N9S3-2;Q8N9S3-3	Activator of 90 kDa heat shock protein ATPase homolog 2;Isoform 2 of Activator of 90 kDa heat shock protein ATPase homolog 2;Isoform 3 of Activator of 90 kDa heat shock protein ATPase homolog 2	AHSA2_MOUSE	Ahsa2	8554	9585	10288	7024	8888	9209		9475.67	8373.67							6	6	6	6	6	6
	Q8C4Q6	Axin interactor, dorsalization-associated protein	AIDA_MOUSE	Aida	10556	10233	10078	4907	6268	5226		10289	5467			targetP signal				6	6	6	6	6	6
	Q9Z0X1	Apoptosis-inducing factor 1, mitochondrial	AIFM1_MOUSE	Aifm1	59734	57777	56718	46089	55362	55069		58076.3	52173.3		MitoCarta3.0	literature, APEX_IMS, targetP signal, yeast mito homolog, mito protein domain, induction, coexpression++, MS/MS++	MIM	Protein import, sorting and homeostasis > Protein import and sorting > MIA40 | OXPHOS > Complex I > CI assembly factors | OXPHOS > OXPHOS assembly factors | Mitochondrial dynamics and surveillance > Apoptosis		25	26	26	26	26	26
	Q91VJ1	Interferon-inducible protein AIM2	AIM2_MOUSE	Aim2	15913	15454	14376	7446	10495	9804		15247.7	9248.33							12	14	14	12	13	13
	P31230	Aminoacyl tRNA synthase complex-interacting multifunctional protein 1	AIMP1_MOUSE	Aimp1	244667	255072	272509	200428	226925	227323		257416	218225							20	20	19	20	20	20
	Q8R010	Aminoacyl tRNA synthase complex-interacting multifunctional protein 2	AIMP2_MOUSE	Aimp2	168667	160540	170865	123286	145458	141937		166691	136894			mito protein domain				14	14	13	14	14	14
	O08915	AH receptor-interacting protein	AIP_MOUSE	Aip	199686	190702	210612	156595	184382	166178		200333	169052			yeast mito homolog+, mito protein domain				15	15	15	15	15	15
	Q9WTP6;Q9WTP6-2	Adenylate kinase 2, mitochondrial;Isoform 2 of Adenylate kinase 2, mitochondrial	KAD2_MOUSE	Ak2	189435	171991	179261	182415	187296	172195		180229	180635		MitoCarta3.0	literature, APEX_IMS, yeast mito homolog, Rickettsial homolog, mito protein domain, coexpression+, MS/MS++	IMS	Metabolism > Nucleotide metabolism > Nucleotide synthesis and processing		13	13	12	13	13	13
	Q9WTP7	GTP:AMP phosphotransferase AK3, mitochondrial	KAD3_MOUSE	Ak3	79953	81446	90615	75221	82999	83468		84004.7	80562.7		MitoCarta3.0	literature, APEX_matrix, targetP signal, yeast mito homolog, Rickettsial homolog, mito protein domain, induction, coexpression, MS/MS++	Matrix	Metabolism > Nucleotide metabolism > Nucleotide synthesis and processing		14	14	14	14	14	14
	Q9WUR9	Adenylate kinase 4, mitochondrial	KAD4_MOUSE	Ak4	6794	6928	7345	4870	6366	6078		7022.33	5771.33		MitoCarta3.0	APEX_matrix, yeast mito homolog++, Rickettsial homolog, mito protein domain, MS/MS++	Matrix	Metabolism > Nucleotide metabolism > Nucleotide synthesis and processing		5	5	5	5	5	5
	Q8VCP8	Adenylate kinase isoenzyme 6	KAD6_MOUSE	Ak6	7847	8743	9742	7323	8696	7537		8777.33	7852			Rickettsial homolog, mito protein domain				5	5	5	5	5	5
	O08715;O08715-4	A-kinase anchor protein 1, mitochondrial;Isoform 4 of A-kinase anchor protein 1, mitochondrial	AKAP1_MOUSE	Akap1	3751	3132	2938	2304	2364	2068		3273.67	2245.33		MitoCarta3.0	literature, mito protein domain, induction, coexpression++, MS/MS+	MOM	Signaling > cAMP-PKA signaling		8	8	7	7	7	6
	O88845	A-kinase anchor protein 10, mitochondrial	AKA10_MOUSE	Akap10	7917	7214	2431	1504	2547	2725		5854	2258.67		MitoCarta3.0	literature, mito protein domain	MOM	Signaling > cAMP-PKA signaling		8	8	9	9	9	8
	E9Q774;E9Q777	A kinase (PRKA) anchor protein 11	E9Q774_MOUSE;E9Q777_MOUSE	Akap11	223	370	274	234	219	281		289	244.667							4	5	5	5	5	5
	E9Q394-2	Isoform 2 of A-kinase anchor protein 13	AKP13_MOUSE	Akap13	6547	6609	6382	6232	6123	5872		6512.67	6075.67			mito protein domain				57	60	53	57	55	56
	Q9DBR0	A-kinase anchor protein 8	AKAP8_MOUSE	Akap8	20501	20904	25555	20479	22235	19820		22320	20844.7							21	21	21	22	20	21
	Q9R0L7	A-kinase anchor protein 8-like	AKP8L_MOUSE	Akap8l	1180	1146	2017	1577	1696	1715		1447.67	1662.67							5	5	6	5	6	6
	Q80VW7	Microtubule organization protein AKNA	AKNA_MOUSE	Akna	9184	9710	9664	7348	8479	8240		9519.33	8022.33							33	35	35	34	35	33
	Q9JII6	Aldo-keto reductase family 1 member A1	AK1A1_MOUSE	Akr1a1	119881	116800	116842	91962	104481	100201		117841	98881.3							20	21	21	21	18	21
	P45376	Aldo-keto reductase family 1 member B1	ALDR_MOUSE	Akr1b1	461722	529213	531610	404856	444584	416864		507515	422101							21	21	21	20	21	20
	G5E895	Aldo-keto reductase family 1, member B10 (aldose reductase)	G5E895_MOUSE	Akr1b10	12170	12529	17232	13900	17404	10734		13977	14012.7		MitoCarta3.0	induction, coexpression, MS/MS++	unknown	Metabolism > Vitamin metabolism > Vitamin A metabolism | Metabolism > Detoxification > Xenobiotic metabolism		11	11	10	11	10	11
	Q8VC28	Aldo-keto reductase family 1 member C13	AK1CD_MOUSE	Akr1c13	43206	38987	40733	49032	40224	40717		40975.3	43324.3							17	17	17	17	18	17
	Q9DCT1	1,5-anhydro-D-fructose reductase	AKCL2_MOUSE	Akr1e2	4851	5296	5294	5924	5758	4622		5147	5434.67			coexpression				5	5	5	5	5	5
	Q8CG76	Aflatoxin B1 aldehyde reductase member 2	ARK72_MOUSE	Akr7a2	11078	11136	11350	9794	10652	10044		11188	10163.3		MitoCarta3.0	APEX_matrix, targetP signal+, coexpression, MS/MS++	Matrix	Metabolism > Amino acid metabolism > GABA metabolism | Metabolism > Detoxification > Xenobiotic metabolism		9	10	10	10	10	10
	P31750	RAC-alpha serine/threonine-protein kinase	AKT1_MOUSE	Akt1	69400	70570	76336	60161	66428	63472		72102	63353.7			mito protein domain				22	22	22	21	22	22
	Q9D1F4	Proline-rich AKT1 substrate 1	AKTS1_MOUSE	Akt1s1	2227	1807	1903	1419	1873	1580		1979	1624			coexpression				3	3	3	3	3	3
	Q60823	RAC-beta serine/threonine-protein kinase	AKT2_MOUSE	Akt2	29803	28627	28887	19833	23406	23391		29105.7	22210			mito protein domain, coexpression				17	17	16	15	16	17
	Q64362	AKT-interacting protein	AKTIP_MOUSE	Aktip	445	360	224	167	216	102		343	161.667							1	2	2	1	2	1
	P10518	Delta-aminolevulinic acid dehydratase	HEM2_MOUSE	Alad	110829	92804	82383	46867	62171	65255		95338.7	58097.7			Rickettsial homolog, coexpression				14	14	14	14	14	14
	P07724	Albumin	ALBU_MOUSE	Alb	45574	39537	59624	52280	55103	55078		48245	54153.7							3	3	3	3	3	3
	Q61490	CD166 antigen	CD166_MOUSE	Alcam	11228	12155	12496	8011	9009	9082		11959.7	8700.67							12	12	12	12	12	12
	Q571I9	Aldehyde dehydrogenase family 16 member A1	A16A1_MOUSE	Aldh16a1	23439	19839	22266	18600	20545	20749		21848	19964.7			yeast mito homolog, mito protein domain, coexpression				16	16	16	16	16	16
	Q9Z110	Delta-1-pyrroline-5-carboxylate synthase	P5CS_MOUSE	Aldh18a1	183516	163708	167433	115221	146754	139523		171552	133833		MitoCarta3.0	literature, targetP signal+, Rickettsial homolog, mito protein domain, coexpression, MS/MS++	Matrix	Metabolism > Amino acid metabolism > Proline metabolism		47	47	46	43	46	48
	Q9CZS1	Aldehyde dehydrogenase X, mitochondrial	AL1B1_MOUSE	Aldh1b1	1128	1586	1575	1182	1492	1313		1429.67	1329		MitoCarta3.0	literature, APEX_matrix, targetP signal, yeast mito homolog+, mito protein domain, MS/MS++	Matrix	Metabolism > Detoxification > Xenobiotic metabolism		5	7	6	6	6	7
	P47738	Aldehyde dehydrogenase, mitochondrial	ALDH2_MOUSE	Aldh2	9938	2705	2508	3016	2987	2996		5050.33	2999.67		MitoCarta3.0	literature, APEX_matrix, targetP signal, yeast mito homolog+, mito protein domain, coexpression, MS/MS++	Matrix	Metabolism > Detoxification > Xenobiotic metabolism		4	4	5	6	6	5
	P47740	Aldehyde dehydrogenase family 3 member A2	AL3A2_MOUSE	Aldh3a2	17110	15939	17170	13099	16235	14797		16739.7	14710.3		MitoCarta3.0	targetP signal+, yeast mito homolog, mito protein domain, coexpression	Membrane	Metabolism > Detoxification > ROS and glutathione metabolism		13	13	12	12	13	13
	Q8CHT0	Delta-1-pyrroline-5-carboxylate dehydrogenase, mitochondrial	AL4A1_MOUSE	Aldh4a1	3640	4658	4235	3703	4381	4231		4177.67	4105		MitoCarta3.0	literature, APEX_matrix, targetP signal+, yeast mito homolog++, mito protein domain, coexpression, MS/MS++	Matrix	Metabolism > Amino acid metabolism > Proline metabolism | Metabolism > Amino acid metabolism > Glyoxylate metabolism		8	8	7	8	8	8
	Q9DBF1-2	Isoform 2 of Alpha-aminoadipic semialdehyde dehydrogenase	AL7A1_MOUSE	Aldh7a1	11198	10501	10619	6506	9490	8908		10772.7	8301.33		MitoCarta3.0	literature, APEX_matrix, targetP signal, yeast mito homolog, mito protein domain, MS/MS++	Matrix	Metabolism > Amino acid metabolism > Lysine metabolism | Metabolism > Amino acid metabolism > Glycine metabolism | Metabolism > Vitamin metabolism > Choline and betaine metabolism | Metabolism > Vitamin metabolism > Folate and 1-C metabolism | Metabolism > Detoxification > ROS and glutathione metabolism		12	11	11	12	12	12
	Q9JLJ2	4-trimethylaminobutyraldehyde dehydrogenase	AL9A1_MOUSE	Aldh9a1	142048	150216	151397	123346	140808	134889		147887	133014		MitoCarta3.0	APEX_matrix, targetP signal, yeast mito homolog+, mito protein domain, coexpression, MS/MS++	Matrix	Metabolism > Amino acid metabolism > GABA metabolism | Metabolism > Detoxification > ROS and glutathione metabolism		31	32	31	31	32	32
	P05064	Fructose-bisphosphate aldolase A	ALDOA_MOUSE	Aldoa	6788360	7203356	7182608	4504996	5940496	6012590		7058108	5.48603e+06							45	45	42	42	43	45
	P05063	Fructose-bisphosphate aldolase C	ALDOC_MOUSE	Aldoc	290360	294734	220950	182471	247085	224041		268681	217866							18	17	18	18	18	18
	Q921Q3;Q921Q3-2	Chitobiosyldiphosphodolichol beta-mannosyltransferase;Isoform 2 of Chitobiosyldiphosphodolichol beta-mannosyltransferase	ALG1_MOUSE	Alg1	7105	8586	5634	7879	7664	6533		7108.33	7358.67							8	8	8	8	8	8
	Q3UGP8	Putative Dol-P-Glc:Glc(2)Man(9)GlcNAc(2)-PP-Dol alpha-1,2-glucosyltransferase	AG10B_MOUSE	Alg10b	481	684	518	403	487	389		561	426.333							2	2	1	1	2	2
	Q3TZM9	GDP-Man:Man(3)GlcNAc(2)-PP-Dol alpha-1,2-mannosyltransferase	ALG11_MOUSE	Alg11	1504	1669	1652	1166	1198	1480		1608.33	1281.33							3	3	3	3	3	3
	Q9DBE8	Alpha-1,3/1,6-mannosyltransferase ALG2	ALG2_MOUSE	Alg2	8534	7927	7779	4946	6844	6332		8080	6040.67			targetP signal, Rickettsial homolog				9	10	10	10	10	10
	Q8K2A8	Dol-P-Man:Man(5)GlcNAc(2)-PP-Dol alpha-1,3-mannosyltransferase	ALG3_MOUSE	Alg3	4905	3950	3859	2500	3185	3112		4238	2932.33			targetP signal, coexpression				3	3	3	3	3	3
	Q9DB25	Dolichyl-phosphate beta-glucosyltransferase	ALG5_MOUSE	Alg5	37650	37535	36640	27279	32763	31911		37275	30651			Rickettsial homolog				10	10	10	10	10	11
	Q6P8H8	Probable dolichyl pyrophosphate Glc1Man9GlcNAc2 alpha-1,3-glucosyltransferase	ALG8_MOUSE	Alg8	9641	6651	8396	6831	7168	6626		8229.33	6875							4	4	4	4	4	4
	Q8VDI9	Alpha-1,2-mannosyltransferase ALG9	ALG9_MOUSE	Alg9	1891	1139	1811	1414	1372	1437		1613.67	1407.67			coexpression				6	4	6	6	6	6
	Q8K1E6	Alpha-ketoglutarate-dependent dioxygenase alkB homolog 3	ALKB3_MOUSE	Alkbh3	9257	8133	7919	5944	7134	7145		8436.33	6741			mito protein domain, induction, coexpression				8	8	8	8	8	8
	Q3TSG4	RNA demethylase ALKBH5	ALKB5_MOUSE	Alkbh5	25476	22972	22003	18479	20881	20192		23483.7	19850.7			mito protein domain				11	12	12	12	13	12
	Q8K2U2	Alpha-ketoglutarate-dependent dioxygenase alkB homolog 6	ALKB6_MOUSE	Alkbh6	2439	2278	1873	1808	1873	1810		2196.67	1830.33			mito protein domain, induction				2	2	1	2	1	1
	Q80Y20;Q80Y20-2	Alkylated DNA repair protein alkB homolog 8;Isoform 2 of Alkylated DNA repair protein alkB homolog 8	ALKB8_MOUSE	Alkbh8	376	0	553	440	401	217		309.667	352.667			mito protein domain				1	Filtered	2	2	2	1
	O08583	THO complex subunit 4	THOC4_MOUSE	Alyref	307860	301707	391125	362200	358231	301179		333564	340537			mito protein domain				12	10	11	11	11	11
	A2AH22;A2AH22-2;A2AH22-5;A2AH22-6;A2AH22-7	Activating molecule in BECN1-regulated autophagy protein 1;Isoform 2 of Activating molecule in BECN1-regulated autophagy protein 1;Isoform 5 of Activating molecule in BECN1-regulated autophagy protein 1;Isoform 6 of Activating molecule in BECN1-regulated autophagy protein 1;Isoform 7 of Activating molecule in BECN1-regulated autophagy protein 1	AMRA1_MOUSE	Ambra1	1007	1013	1123	819	1001	872		1047.67	897.333			mito protein domain				9	9	10	10	10	9
	Q8JZV7	N-acetylglucosamine-6-phosphate deacetylase	NAGA_MOUSE	Amdhd2	19668	18586	19249	16023	16777	17541		19167.7	16780.3							9	10	9	9	9	10
	Q9R049-2	Isoform 2 of E3 ubiquitin-protein ligase AMFR	AMFR_MOUSE	Amfr	6438	6461	6500	4556	5519	5802		6466.33	5292.33			mito protein domain, coexpression				9	10	10	10	10	10
	Q8JZZ6	AMMECR1-like protein	AMERL_MOUSE	Ammecr1l	2059	2255	2391	1690	2189	1527		2235	1802							3	3	3	3	3	2
	Q9DBT5	AMP deaminase 2	AMPD2_MOUSE	Ampd2	34970	22468	27039	20757	23366	32637		28159	25586.7			targetP signal				24	22	22	22	23	24
	P53995	Anaphase-promoting complex subunit 1	APC1_MOUSE	Anapc1	10580	10716	10218	8401	9439	8864		10504.7	8901.33							51	51	49	50	49	53
	Q9CPX9	Anaphase-promoting complex subunit 11	APC11_MOUSE	Anapc11	2235	2409	3507	1846	2485	2218		2717	2183							2	2	2	2	2	2
	Q8BZQ7	Anaphase-promoting complex subunit 2	ANC2_MOUSE	Anapc2	12535	11814	11346	9111	10563	9860		11898.3	9844.67							22	23	22	21	23	23
	Q91W96	Anaphase-promoting complex subunit 4	APC4_MOUSE	Anapc4	13774	12986	14028	11232	10906	10075		13596	10737.7							19	19	19	19	18	19
	Q8BTZ4	Anaphase-promoting complex subunit 5	APC5_MOUSE	Anapc5	21790	14254	14209	14972	16675	15087		16751	15578			mito protein domain, coexpression				23	25	23	24	25	24
	Q9WVM3	Anaphase-promoting complex subunit 7	APC7_MOUSE	Anapc7	14916	13108	11720	8082	11746	14239		13248	11355.7			mito protein domain				17	17	17	17	16	17
	Q8K1C0;Q8K1C0-2;Q8K1C0-3	Protein angel homolog 2;Isoform 2 of Protein angel homolog 2;Isoform 3 of Protein angel homolog 2	ANGE2_MOUSE	Angel2	5205	8509	5738	4966	4994	6379		6484	5446.33		MitoCarta3.0	APEX_matrix, mito protein domain, MS/MS	Matrix	Mitochondrial central dogma > mtRNA metabolism > mt-mRNA modifications		10	10	11	10	10	11
	Q810B6	Rabankyrin-5	ANFY1_MOUSE	Ankfy1	37811	36486	36133	18201	28175	29641		36810	25339			Rickettsial homolog, mito protein domain				37	39	39	39	40	40
	E9PUR0;E9Q1M6	Ankyrin repeat and KH domain-containing 1	E9PUR0_MOUSE;E9Q1M6_MOUSE	Ankhd1	15224	14278	14412	10142	10566	12433		14638	11047			Rickettsial homolog, mito protein domain				29	29	29	27	28	29
	Q6P1H6	Ankyrin repeat and LEM domain-containing protein 2	ANKL2_MOUSE	Ankle2	7982	8027	8886	6269	7626	6905		8298.33	6933.33							20	21	20	21	21	21
	Q3TPE9	Ankyrin repeat and MYND domain-containing protein 2	ANKY2_MOUSE	Ankmy2	6365	6039	6075	3797	5162	4974		6159.67	4644.33			Rickettsial homolog, mito protein domain				7	7	7	7	7	7
	Q99LW0	Ankyrin repeat domain-containing protein 10	ANR10_MOUSE	Ankrd10	2792	2489	2358	2251	2325	2164		2546.33	2246.67			Rickettsial homolog, mito protein domain				3	3	3	3	3	3
	E9Q4F7	Ankyrin repeat domain-containing protein 11	ANR11_MOUSE	Ankrd11	433	304	329	284	303	301		355.333	296			Rickettsial homolog, mito protein domain				7	7	7	7	7	7
	Q80UP5	Ankyrin repeat domain-containing protein 13A	AN13A_MOUSE	Ankrd13a	11826	10498	10470	7960	8788	8607		10931.3	8451.67			mito protein domain				16	16	16	15	16	16
	Q99NH0	Ankyrin repeat domain-containing protein 17	ANR17_MOUSE	Ankrd17	5242	5074	4730	3241	3914	3707		5015.33	3620.67			Rickettsial homolog, mito protein domain				30	30	30	30	30	31
	Q505D1	Serine/threonine-protein phosphatase 6 regulatory ankyrin repeat subunit A	ANR28_MOUSE	Ankrd28	4906	4160	4313	3432	3966	3386		4459.67	3594.67			Rickettsial homolog, mito protein domain				14	15	14	15	15	15
	B2RXR6	Serine/threonine-protein phosphatase 6 regulatory ankyrin repeat subunit B	ANR44_MOUSE	Ankrd44	75639	62347	66817	52496	54264	56106		68267.7	54288.7			Rickettsial homolog, mito protein domain				48	48	47	46	47	49
	Q8BTZ5	Ankyrin repeat domain-containing protein 46	ANR46_MOUSE	Ankrd46	5253	1698	4154	3098	3632	2673		3701.67	3134.33			Rickettsial homolog, mito protein domain				2	1	2	2	2	2
	Q8VE42	Ankyrin repeat domain-containing protein 49	ANR49_MOUSE	Ankrd49	4628	2811	3228	3036	3038	2823		3555.67	2965.67			Rickettsial homolog, mito protein domain				3	3	3	3	3	3
	Q8BTI7	Serine/threonine-protein phosphatase 6 regulatory ankyrin repeat subunit C	ANR52_MOUSE	Ankrd52	8605	8459	6932	4595	6116	6056		7998.67	5589			Rickettsial homolog, mito protein domain				18	19	19	19	19	18
	Q91WK7	Ankyrin repeat domain-containing protein 54	ANR54_MOUSE	Ankrd54	2880	2699	1537	2211	2234	1613		2372	2019.33			Rickettsial homolog, mito protein domain				2	2	1	2	2	2
	P59672;P59672-2	Ankyrin repeat and SAM domain-containing protein 1A;Isoform 2 of Ankyrin repeat and SAM domain-containing protein 1A	ANS1A_MOUSE	Anks1a	520	487	398	311	370	370		468.333	350.333			Rickettsial homolog, mito protein domain, coexpression				2	2	2	2	2	2
	Q80UU1	Ankyrin repeat and zinc finger domain-containing protein 1	ANKZ1_MOUSE	Ankzf1	3573	3522	3719	3181	3766	3525		3604.67	3490.67			yeast mito homolog, mito protein domain, induction				8	8	7	8	8	8
	Q8K298	Anillin	ANLN_MOUSE	Anln	8422	5327	7653	5644	4942	6589		7134	5725			mito protein domain				23	23	22	23	22	23
	Q8BH79;Q8BH79-2	Anoctamin-10;Isoform 2 of Anoctamin-10	ANO10_MOUSE	Ano10	2615	2023	2099	1488	1870	1768		2245.67	1708.67			coexpression				5	5	5	6	5	5
	Q6P9J9	Anoctamin-6	ANO6_MOUSE	Ano6	1707	1671	1534	1299	1386	1450		1637.33	1378.33							6	6	5	6	6	6
	O35381	Acidic leucine-rich nuclear phosphoprotein 32 family member A	AN32A_MOUSE	Anp32a	576163	551590	651916	617824	600403	550670		593223	589632			mito protein domain				16	17	14	14	14	14
	Q9EST5;Q9EST5-2	Acidic leucine-rich nuclear phosphoprotein 32 family member B;Isoform 2 of Acidic leucine-rich nuclear phosphoprotein 32 family member B	AN32B_MOUSE	Anp32b	882972	705858	896980	798109	812154	700777		828603	770347			mito protein domain, MS/MS				8	7	5	5	5	6
	P97822	Acidic leucine-rich nuclear phosphoprotein 32 family member E	AN32E_MOUSE	Anp32e	361051	298746	307486	300872	303796	263859		322428	289509			mito protein domain				11	11	11	11	11	11
	Q501J2	Adenine nucleotide translocase lysine N-methyltransferase	ANKMT_MOUSE	Antkmt	6977	5449	5921	5490	6581	5147		6115.67	5739.33		MitoCarta3.0	literature,coexpression, MS/MS	MIM	Metabolism > Nucleotide metabolism		6	6	6	6	6	7
	P10107	Annexin A1	ANXA1_MOUSE	Anxa1	166182	168916	150186	47946	99798	96275		161761	81339.7			MS/MS				28	28	28	26	28	28
	P97384	Annexin A11	ANX11_MOUSE	Anxa11	134044	141319	138493	110042	125813	120115		137952	118657							21	22	21	20	22	21
	P07356	Annexin A2	ANXA2_MOUSE	Anxa2	3085007	2780611	2610913	1681972	2204133	2122860		2.82551e+06	2.00299e+06							39	38	34	35	34	38
	P97429	Annexin A4	ANXA4_MOUSE	Anxa4	118007	100454	142420	107156	116279	86870		120294	103435							18	20	20	18	20	18
	P48036	Annexin A5	ANXA5_MOUSE	Anxa5	408157	374445	342843	178578	242945	251672		375148	224398							24	25	23	23	24	24
	P14824	Annexin A6	ANXA6_MOUSE	Anxa6	2448762	2222103	2033813	1759044	1904181	1847095		2.23489e+06	1.83677e+06							65	69	64	62	64	66
	Q07076	Annexin A7	ANXA7_MOUSE	Anxa7	142257	136388	140263	89183	113030	108084		139636	103432							22	22	22	22	22	22
	O35643	AP-1 complex subunit beta-1	AP1B1_MOUSE	Ap1b1	127074	114374	116415	92617	102615	101400		119288	98877.3							49	49	47	47	49	49
	P22892	AP-1 complex subunit gamma-1	AP1G1_MOUSE	Ap1g1	44052	42219	45383	32934	37961	35409		43884.7	35434.7			targetP signal, coexpression				27	27	27	26	27	28
	O88512	AP-1 complex subunit gamma-like 2	AP1G2_MOUSE	Ap1g2	35369	33368	39734	36251	40269	34848		36157	37122.7							29	27	27	26	26	27
	P35585	AP-1 complex subunit mu-1	AP1M1_MOUSE	Ap1m1	108793	109856	118147	98758	107438	106477		112265	104224							22	22	22	22	22	22
	P61967	AP-1 complex subunit sigma-1A	AP1S1_MOUSE	Ap1s1	83598	86188	86239	69717	75783	79400		85341.7	74966.7			targetP signal				6	6	6	6	6	6
	Q9DB50	AP-1 complex subunit sigma-2	AP1S2_MOUSE	Ap1s2	13690	6441	9740	7693	11386	9819		9957	9632.67			targetP signal				2	2	2	2	2	2
	Q7TN05	AP-1 complex subunit sigma-3	AP1S3_MOUSE	Ap1s3	8017	6497	5902	4366	5336	5411		6805.33	5037.67			targetP signal				3	3	2	3	3	3
	P17426;P17426-2	AP-2 complex subunit alpha-1;Isoform B of AP-2 complex subunit alpha-1	AP2A1_MOUSE	Ap2a1	68568	68814	69708	49549	58827	56532		69030	54969.3							46	46	46	47	46	46
	P17427	AP-2 complex subunit alpha-2	AP2A2_MOUSE	Ap2a2	45521	41479	39566	28136	33055	31869		42188.7	31020							32	32	32	32	32	32
	Q9DBG3;Q9DBG3-2	AP-2 complex subunit beta;Isoform 2 of AP-2 complex subunit beta	AP2B1_MOUSE	Ap2b1	90113	84837	87015	65548	76159	74975		87321.7	72227.3							30	28	29	29	28	29
	P84091	AP-2 complex subunit mu	AP2M1_MOUSE	Ap2m1	118717	113908	112236	80600	97013	94925		114954	90846			induction				22	22	22	22	22	22
	P62743	AP-2 complex subunit sigma	AP2S1_MOUSE	Ap2s1	70075	70067	58839	55157	50710	64135		66327	56667.3							7	7	7	7	7	7
	Q9Z1T1	AP-3 complex subunit beta-1	AP3B1_MOUSE	Ap3b1	30305	30697	27568	20197	24791	23116		29523.3	22701.3			MS/MS				37	39	37	34	38	37
	O54774	AP-3 complex subunit delta-1	AP3D1_MOUSE	Ap3d1	27331	22835	22191	16429	19649	18737		24119	18271.7			MS/MS				38	37	39	39	39	39
	Q9JKC8	AP-3 complex subunit mu-1	AP3M1_MOUSE	Ap3m1	39375	38898	45863	31433	25231	23926		41378.7	26863.3			MS/MS				12	12	13	12	12	11
	Q9DCR2	AP-3 complex subunit sigma-1	AP3S1_MOUSE	Ap3s1	41381	37655	35381	25844	29729	30104		38139	28559							8	8	8	8	7	7
	Q9WV76	AP-4 complex subunit beta-1	AP4B1_MOUSE	Ap4b1	1227	1384	1019	469	840	529		1210	612.667							6	5	5	5	5	6
	Q80V94	AP-4 complex subunit epsilon-1	AP4E1_MOUSE	Ap4e1	1040	792	765	841	708	613		865.667	720.667							5	5	5	6	5	5
	Q9JKC7	AP-4 complex subunit mu-1	AP4M1_MOUSE	Ap4m1	901	989	870	630	737	849		920	738.667							2	2	2	2	2	2
	Q9WVL1	AP-4 complex subunit sigma-1	AP4S1_MOUSE	Ap4s1	3715	2984	2812	2250	2683	2244		3170.33	2392.33			coexpression				1	2	2	2	2	1
	Q3TAP4	AP-5 complex subunit beta-1	AP5B1_MOUSE	Ap5b1	86	150	168	142	170	161		134.667	157.667			targetP signal				1	2	2	2	2	2
	Q8BJ63	AP-5 complex subunit mu-1	AP5M1_MOUSE	Ap5m1	1006	704	614	548	502	611		774.667	553.667			targetP signal, induction				2	2	2	2	1	2
	Q3U829	AP-5 complex subunit zeta-1	AP5Z1_MOUSE	Ap5z1	549	559	520	374	449	452		542.667	425							4	4	4	4	4	4
	O88879	Apoptotic protease-activating factor 1	APAF_MOUSE	Apaf1	18877	16461	17082	12763	14817	13846		17473.3	13808.7			mito protein domain				35	34	35	34	36	34
	Q8R5A3	Amyloid beta A4 precursor protein-binding family B member 1-interacting protein	AB1IP_MOUSE	Apbb1ip	35786	38722	34269	25514	29873	29384		36259	28257			mito protein domain				14	16	15	16	16	15
	Q8R146;Q8R146-2	Acylamino-acid-releasing enzyme;Isoform 2 of Acylamino-acid-releasing enzyme	APEH_MOUSE	Apeh	44536	46255	44238	33070	38318	39251		45009.7	36879.7			Rickettsial homolog, MS/MS				24	24	24	24	24	24
	P28352	DNA-(apurinic or apyrimidinic site) endonuclease	APEX1_MOUSE	Apex1	141601	122459	121147	108845	112714	102056		128402	107872		MitoCarta3.0	literature,Rickettsial homolog, mito protein domain	Matrix	Mitochondrial central dogma > mtDNA maintenance > mtDNA repair		18	18	17	17	18	18
	O35841	Apoptosis inhibitor 5	API5_MOUSE	Api5	188589	190727	190883	170114	172942	159242		190066	167433							29	30	27	27	25	29
	Q9WVQ5	Methylthioribulose-1-phosphate dehydratase	MTNB_MOUSE	Apip	45008	47700	46845	33233	39782	37812		46517.7	36942.3			induction				12	13	12	12	12	12
	Q9D7N9	Adipocyte plasma membrane-associated protein	APMAP_MOUSE	Apmap	45486	74951	63154	42913	55906	39620		61197	46146.3			coexpression				21	18	19	17	19	20
	Q00623	Apolipoprotein A-I	APOA1_MOUSE	Apoa1	18540	19875	23270	20358	24087	25563		20561.7	23336							2	2	2	2	2	2
	E9Q414	Apolipoprotein B-100	APOB_MOUSE	Apob	1100	1180	1107	575	734	886		1129	731.667							5	6	6	6	5	6
	Q99J72;Q99J72-4	DNA dC->dU-editing enzyme APOBEC-3;Isoform 4 of DNA dC->dU-editing enzyme APOBEC-3	ABEC3_MOUSE	Apobec3	164443	154485	151705	120000	138383	135788		156878	131390							24	24	22	22	24	24
	Q8VBT6	Apolipoprotein B receptor	APOBR_MOUSE	Apobr	13106	14481	14772	7540	10825	10169		14119.7	9511.33							30	30	30	29	29	30
	Q9DCZ4;Q9DCZ4-2;Q9DCZ4-3	MICOS complex subunit Mic26;Isoform 2 of MICOS complex subunit Mic26;Isoform 3 of MICOS complex subunit Mic26	MIC26_MOUSE	Apoo	28636	25423	24461	21158	22068	21714		26173.3	21646.7		MitoCarta3.0	literature, APEX_IMS, targetP signal, mito protein domain+, MS/MS++	MIM	Mitochondrial dynamics and surveillance > Cristae formation > MICOS complex		6	6	6	6	5	5
	Q78IK4	MICOS complex subunit Mic27	MIC27_MOUSE	Apool	40958	33743	42287	39642	41772	39423		38996	40279		MitoCarta3.0	literature, yeast mito homolog, mito protein domain+, induction, coexpression++, MS/MS++	MIM	Mitochondrial dynamics and surveillance > Cristae formation > MICOS complex		15	14	14	15	14	15
	Q9DAX9	Amyloid protein-binding protein 2	APBP2_MOUSE	Appbp2	158	136	74	62	78	70		122.667	70			mito protein domain				2	2	1	1	1	2
	Q8K3H0	DCC-interacting protein 13-alpha	DP13A_MOUSE	Appl1	342545	380833	302433	298520	336997	329881		341937	321799							20	22	21	21	20	20
	Q8K3G9	DCC-interacting protein 13-beta	DP13B_MOUSE	Appl2	472	405	469	194	277	326		448.667	265.667							3	3	3	3	3	3
	P08030	Adenine phosphoribosyltransferase	APT_MOUSE	Aprt	575903	568091	508129	351049	432290	450888		550708	411409			MS/MS				12	12	11	11	11	12
	Q7TQC5;Q7TQC5-3	Aprataxin;Isoform 3 of Aprataxin	APTX_MOUSE	Aptx	2442	2343	2347	2030	2266	2161		2377.33	2152.33			targetP signal, Rickettsial homolog, mito protein domain				4	4	4	4	4	4
	Q8CFQ3	RNA helicase aquarius	AQR_MOUSE	Aqr	30018	29041	26216	22129	23427	24295		28425	23283.7							49	50	47	50	49	51
	P04627	Serine/threonine-protein kinase A-Raf	ARAF_MOUSE	Araf	15642	17157	16698	12435	13770	12407		16499	12870.7			mito protein domain				14	13	14	14	14	14
	Q4LDD4;Q4LDD4-2	Arf-GAP with Rho-GAP domain, ANK repeat and PH domain-containing protein 1;Isoform 2 of Arf-GAP with Rho-GAP domain, ANK repeat and PH domain-containing protein 1	ARAP1_MOUSE	Arap1	27639	21973	15820	12746	17921	19895		21810.7	16854			mito protein domain				21	21	22	21	22	22
	Q8BZ05	Arf-GAP with Rho-GAP domain, ANK repeat and PH domain-containing protein 2	ARAP2_MOUSE	Arap2	841	594	448	429	499	505		627.667	477.667							11	10	10	10	10	11
	Q5XJY5	Coatomer subunit delta	COPD_MOUSE	Arcn1	212864	207277	217418	153930	180863	177028		212520	170607			targetP signal				37	37	34	33	35	37
	P84078	ADP-ribosylation factor 1	ARF1_MOUSE	Arf1	1639688	1477457	1445532	1113283	1264805	1188086		1.52089e+06	1.18872e+06			mito protein domain, induction, coexpression				16	18	13	13	13	15
	P61750	ADP-ribosylation factor 4	ARF4_MOUSE	Arf4	38554	38269	39765	30548	33971	33754		38862.7	32757.7			targetP signal, mito protein domain				5	5	4	4	4	4
	P84084	ADP-ribosylation factor 5	ARF5_MOUSE	Arf5	146306	151427	173778	137003	145210	139244		157170	140486		MitoCarta3.0	targetP signal, mito protein domain, coexpression, MS/MS	unknown			8	8	7	7	7	8
	P62331	ADP-ribosylation factor 6	ARF6_MOUSE	Arf6	342277	333509	332888	221035	278751	285665		336225	261817			mito protein domain				7	8	8	8	7	8
	Q9EPJ9	ADP-ribosylation factor GTPase-activating protein 1	ARFG1_MOUSE	Arfgap1	16960	19316	17410	13472	15978	17016		17895.3	15488.7							13	14	13	13	13	14
	Q99K28;Q99K28-2	ADP-ribosylation factor GTPase-activating protein 2;Isoform 2 of ADP-ribosylation factor GTPase-activating protein 2	ARFG2_MOUSE	Arfgap2	44955	46281	45199	35098	40686	40659		45478.3	38814.3							23	25	21	22	22	22
	Q9D8S3	ADP-ribosylation factor GTPase-activating protein 3	ARFG3_MOUSE	Arfgap3	1626	1624	1700	948	1348	1303		1650	1199.67							5	5	5	5	5	5
	G3X9K3	Brefeldin A-inhibited guanine nucleotide-exchange protein 1	BIG1_MOUSE	Arfgef1	11025	9163	7782	6101	6919	6733		9323.33	6584.33			Rickettsial homolog				43	44	44	44	46	44
	A2A5R2	Brefeldin A-inhibited guanine nucleotide-exchange protein 2	BIG2_MOUSE	Arfgef2	5476	4628	4047	3335	3682	3387		4717	3468			Rickettsial homolog, induction				28	27	27	28	28	28
	Q3UGY8	Brefeldin A-inhibited guanine nucleotide-exchange protein 3	BIG3_MOUSE	Arfgef3	141	112	115	53	89	81		122.667	74.3333							3	4	4	4	4	4
	A2RSX9	ADP-ribosylation factor interacting protein 1	A2RSX9_MOUSE	Arfip1	29048	32863	30660	21065	27987	26897		30857	25316.3							14	16	14	15	15	16
	Q8K221	Arfaptin-2	ARFP2_MOUSE	Arfip2	1370	1202	1160	918	1106	1052		1244	1025.33							4	4	4	4	4	4
	Q8BXL7	ADP-ribosylation factor-related protein 1	ARFRP_MOUSE	Arfrp1	12786	14816	15230	10423	12986	13071		14277.3	12160			mito protein domain, induction				7	7	7	7	7	7
	Q3UL36	Arginine and glutamate-rich protein 1	ARGL1_MOUSE	Arglu1	11771	12558	12680	10629	10291	10777		12336.3	10565.7							4	4	4	4	4	4
	Q5FWK3	Rho GTPase-activating protein 1	RHG01_MOUSE	Arhgap1	102892	99625	87939	71770	81944	83630		96818.7	79114.7			yeast mito homolog, mito protein domain				24	24	21	21	23	24
	Q80Y19	Rho GTPase-activating protein 11A	RHGBA_MOUSE	Arhgap11a	2928	1714	2132	2175	2111	2106		2258	2130.67			yeast mito homolog, mito protein domain				11	10	12	12	12	12
	Q8C0D4	Rho GTPase-activating protein 12	RHG12_MOUSE	Arhgap12	496	1215	658	298	584	1250		789.667	710.667			yeast mito homolog, mito protein domain				2	4	4	3	4	4
	Q811M1	Rho GTPase-activating protein 15	RHG15_MOUSE	Arhgap15	12741	12733	13876	14858	14431	13351		13116.7	14213.3			yeast mito homolog, mito protein domain				16	15	14	16	16	17
	Q3UIA2;Q3UIA2-2;Q3UIA2-3;Q3UIA2-4	Rho GTPase-activating protein 17;Isoform 2 of Rho GTPase-activating protein 17;Isoform 3 of Rho GTPase-activating protein 17;Isoform 4 of Rho GTPase-activating protein 17	RHG17_MOUSE	Arhgap17	11161	11052	10744	7919	8733	8744		10985.7	8465.33			yeast mito homolog, mito protein domain				17	17	17	16	17	16
	Q8K0Q5	Rho GTPase-activating protein 18	RHG18_MOUSE	Arhgap18	21365	22138	21898	14665	17189	18582		21800.3	16812			yeast mito homolog, mito protein domain, induction				24	24	21	21	22	24
	Q8BRH3;Q8BRH3-2	Rho GTPase-activating protein 19;Isoform 2 of Rho GTPase-activating protein 19	RHG19_MOUSE	Arhgap19	570	586	703	717	698	627		619.667	680.667			yeast mito homolog, mito protein domain				2	2	3	3	3	2
	Q6DFV3	Rho GTPase-activating protein 21	RHG21_MOUSE	Arhgap21	2347	2391	1970	1909	1704	1808		2236	1807			yeast mito homolog, mito protein domain, MS/MS				2	2	2	2	2	2
	Q8BYW1	Rho GTPase-activating protein 25	RHG25_MOUSE	Arhgap25	20300	16316	15480	16924	17132	16218		17365.3	16758			mito protein domain				24	25	22	24	23	24
	Q6ZQ82	Rho GTPase-activating protein 26	RHG26_MOUSE	Arhgap26	3155	3336	3414	3262	2944	3175		3301.67	3127			mito protein domain				12	12	12	12	11	12
	A2AB59-2	Isoform 2 of Rho GTPase-activating protein 27	RHG27_MOUSE	Arhgap27	4022	4346	4183	3748	4253	3937		4183.67	3979.33			yeast mito homolog, mito protein domain				12	11	11	11	11	11
	Q640N3;Q640N3-2	Rho GTPase-activating protein 30;Isoform 2 of Rho GTPase-activating protein 30	RHG30_MOUSE	Arhgap30	27205	26077	31333	23722	25998	24787		28205	24835.7			mito protein domain				31	33	30	32	33	32
	Q80Z68	Rho GTPase-activating protein 4	Q80Z68_MOUSE	Arhgap4	24070	23758	23024	17942	20974	19052		23617.3	19322.7			mito protein domain				34	32	31	30	32	33
	Q3TBD2	Rho GTPase-activating protein 45	HMHA1_MOUSE	Arhgap45	62174	59555	63472	51900	54729	55438		61733.7	54022.3			mito protein domain				49	49	47	48	48	47
	Q1HDU4;Q8QZW8	ArhGAP9;Rho GTPase-activating protein 9	Q1HDU4_MOUSE;Q8QZW8_MOUSE	Arhgap9	19068	17456	18952	15244	17298	16340		18492	16294			mito protein domain				14	14	12	14	13	14
	Q99PT1	Rho GDP-dissociation inhibitor 1	GDIR1_MOUSE	Arhgdia	3037576	2865128	3005735	2269933	2699017	2769064		2.96948e+06	2579338							17	17	16	16	15	17
	Q61599	Rho GDP-dissociation inhibitor 2	GDIR2_MOUSE	Arhgdib	2138242	2038040	2174458	1827834	2022053	1973241		2.11691e+06	1.94104e+06			MS/MS				22	22	21	20	22	22
	Q61210	Rho guanine nucleotide exchange factor 1	ARHG1_MOUSE	Arhgef1	1817	434	935	1006	702	730		1062	812.667							3	3	3	2	2	3
	Q61210-5	Isoform 5 of Rho guanine nucleotide exchange factor 1	ARHG1_MOUSE	Arhgef1	167423	159130	159220	130585	146914	139319		161924	138939							59	57	53	53	55	60
	Q6P9R4	Rho guanine nucleotide exchange factor 18	ARHGI_MOUSE	Arhgef18	6046	6129	7252	6653	5343	4961		6475.67	5652.33			mito protein domain				10	11	12	13	11	13
	Q60875;Q60875-4;Q60875-5	Rho guanine nucleotide exchange factor 2;Isoform 4 of Rho guanine nucleotide exchange factor 2;Isoform 5 of Rho guanine nucleotide exchange factor 2	ARHG2_MOUSE	Arhgef2	67981	60012	68124	48276	54785	51090		65372.3	51383.7			mito protein domain				44	43	43	43	43	42
	Q8K4I3	Rho guanine nucleotide exchange factor 6	ARHG6_MOUSE	Arhgef6	53396	49492	50839	38685	45436	43032		51242.3	42384.3			mito protein domain				41	41	36	36	37	39
	Q9ES28-8	Isoform H of Rho guanine nucleotide exchange factor 7	ARHG7_MOUSE	Arhgef7	25649	24456	24936	21001	21028	21536		25013.7	21188.3			mito protein domain				25	25	25	25	25	25
	A2BH40	AT-rich interactive domain-containing protein 1A	ARI1A_MOUSE	Arid1a	70310	38515	55012	44736	81473	79481		54612.3	68563.3							61	60	58	58	60	60
	E9Q4N7	AT-rich interactive domain-containing protein 1B	ARI1B_MOUSE	Arid1b	1158	1067	1300	1204	1098	1037		1175	1113							12	11	12	12	11	11
	E9Q7E2	AT-rich interactive domain-containing protein 2	ARID2_MOUSE	Arid2	7501	1687	2166	1700	3888	5676		3784.67	3754.67							14	13	16	15	15	16
	Q62431	AT-rich interactive domain-containing protein 3A	ARI3A_MOUSE	Arid3a	990	1195	1280	922	1092	776		1155	930							4	4	4	4	4	3
	F8VPQ2	AT-rich interactive domain-containing protein 4A	ARI4A_MOUSE	Arid4a	2440	2264	2272	2090	2336	2082		2325.33	2169.33							14	13	15	14	15	14
	A2CG63;A2CG63-2	AT-rich interactive domain-containing protein 4B;Isoform 2 of AT-rich interactive domain-containing protein 4B	ARI4B_MOUSE	Arid4b	333	342	307	279	361	352		327.333	330.667							3	4	3	3	4	4
	Q3U108;Q3U108-2;Q3U108-3	AT-rich interactive domain-containing protein 5A;Isoform 2 of AT-rich interactive domain-containing protein 5A;Isoform 3 of AT-rich interactive domain-containing protein 5A	ARI5A_MOUSE	Arid5a	2474	2386	2566	2491	2525	2448		2475.33	2488							7	7	7	7	7	7
	Q9Z1K5	E3 ubiquitin-protein ligase ARIH1	ARI1_MOUSE	Arih1	36668	33615	39294	28329	32441	28971		36525.7	29913.7			mito protein domain, coexpression				25	25	25	25	25	23
	Q9Z1K6	E3 ubiquitin-protein ligase ARIH2	ARI2_MOUSE	Arih2	6090	6171	6369	4672	5136	5275		6210	5027.67			mito protein domain				10	10	10	10	10	10
	P61211	ADP-ribosylation factor-like protein 1	ARL1_MOUSE	Arl1	138905	110362	86502	66442	78106	80806		111923	75118			mito protein domain				10	10	10	10	10	10
	Q8BIX3	ARL14 effector protein	AL14E_MOUSE	Arl14ep	3269	3506	3544	2471	2980	2722		3439.67	2724.33			coexpression				4	4	4	4	4	4
	Q9D0J4	ADP-ribosylation factor-like protein 2	ARL2_MOUSE	Arl2	56165	50726	48148	42760	41985	27604		51679.7	37449.7		MitoCarta3.0	literature, mito protein domain, coexpression, MS/MS+	IMS	Mitochondrial dynamics and surveillance > Fusion		8	8	7	8	8	8
	Q9D385;Q9D385-2	ADP-ribosylation factor-like protein 2-binding protein;Isoform 2 of ADP-ribosylation factor-like protein 2-binding protein	AR2BP_MOUSE	Arl2bp	4599	4629	4780	3944	5256	4429		4669.33	4543			mito protein domain				4	3	4	4	4	4
	Q9WUL7	ADP-ribosylation factor-like protein 3	ARL3_MOUSE	Arl3	42591	36379	36757	28335	33635	30420		38575.7	30796.7			mito protein domain				6	6	6	6	6	6
	P61208	ADP-ribosylation factor-like protein 4C	ARL4C_MOUSE	Arl4c	6987	3808	4882	2610	3769	3597		5225.67	3325.33			Rickettsial homolog, mito protein domain				3	3	3	3	3	3
	Q80ZU0	ADP-ribosylation factor-like protein 5A	ARL5A_MOUSE	Arl5a	5255	4493	4173	3166	3917	3573		4640.33	3552			Rickettsial homolog, mito protein domain				2	2	2	2	2	2
	O88848;O88848-2	ADP-ribosylation factor-like protein 6;Isoform 2 of ADP-ribosylation factor-like protein 6	ARL6_MOUSE	Arl6	1858	1576	1289	824	1334	1328		1574.33	1162			mito protein domain, MS/MS				2	2	2	2	2	2
	Q9JKW0	ADP-ribosylation factor-like protein 6-interacting protein 1	AR6P1_MOUSE	Arl6ip1	6908	7393	6881	6292	5768	6019		7060.67	6026.33							2	2	2	2	2	2
	Q9JM93	ADP-ribosylation factor-like protein 6-interacting protein 4	AR6P4_MOUSE	Arl6ip4	5685	6491	6089	5135	5811	5735		6088.33	5560.33							3	3	3	3	3	3
	Q8R5J9	PRA1 family protein 3	PRAF3_MOUSE	Arl6ip5	213381	211872	202364	151594	177491	178267		209206	169117							7	8	7	6	7	7
	Q8BH07	ADP-ribosylation factor-like protein 6-interacting protein 6	AR6P6_MOUSE	Arl6ip6	1117	903	922	1142	1040	1020		980.667	1067.33			targetP signal				2	2	2	2	2	2
	Q8VEH3	ADP-ribosylation factor-like protein 8A	ARL8A_MOUSE	Arl8a	132716	105398	97547	70220	85476	81968		111887	79221.3			mito protein domain, MS/MS				10	10	10	10	10	10
	Q9CQW2	ADP-ribosylation factor-like protein 8B	ARL8B_MOUSE	Arl8b	53207	56753	42657	32852	41159	45824		50872.3	39945			mito protein domain				3	4	3	3	3	4
	Q9D7A8	Armadillo repeat-containing protein 1	ARMC1_MOUSE	Armc1	12936	12721	14872	12010	13466	12720		13509.7	12732		mito-interacting	MS/MS+				7	8	7	7	7	8
	Q9D0L7	Armadillo repeat-containing protein 10	ARM10_MOUSE	Armc10	26220	24890	25384	21895	25691	23260		25498	23615.3		MitoCarta3.0	GFP, MS/MS	MOM	Mitochondrial dynamics and surveillance > Fission | Mitochondrial dynamics and surveillance > Trafficking		10	9	10	10	10	10
	Q8BNU0	Armadillo repeat-containing protein 6	ARMC6_MOUSE	Armc6	24255	25702	22838	15966	19617	18516		24265	18033							18	18	18	18	17	17
	Q9DBR3	Armadillo repeat-containing protein 8	ARMC8_MOUSE	Armc8	26632	28404	23611	19327	23188	22916		26215.7	21810.3							24	24	24	25	24	23
	Q6PD19	Armadillo-like helical domain-containing protein 3	ARMD3_MOUSE	Armh3	1038	965	673	634	715	780		892	709.667							3	3	3	4	3	4
	A6H630	Damage-control phosphatase ARMT1	ARMT1_MOUSE	Armt1	10328	11055	9288	6811	8138	7694		10223.7	7547.67							14	15	13	14	14	15
	P53762;P53762-2	Aryl hydrocarbon receptor nuclear translocator;Isoform Short of Aryl hydrocarbon receptor nuclear translocator	ARNT_MOUSE	Arnt	1291	877	831	669	884	824		999.667	792.333			mito protein domain				4	4	4	4	4	4
	Q9R0Q6	Actin-related protein 2/3 complex subunit 1A	ARC1A_MOUSE	Arpc1a	21740	17564	18152	16927	17052	16446		19152	16808.3			mito protein domain				14	14	13	13	13	14
	Q9WV32	Actin-related protein 2/3 complex subunit 1B	ARC1B_MOUSE	Arpc1b	850684	837719	735464	553874	661400	659839		807956	625038			mito protein domain				28	28	26	25	26	27
	Q9CVB6	Actin-related protein 2/3 complex subunit 2	ARPC2_MOUSE	Arpc2	1121967	1062811	1072433	835050	944380	908374		1085737	895935			MS/MS				27	28	23	25	26	27
	Q9JM76	Actin-related protein 2/3 complex subunit 3	ARPC3_MOUSE	Arpc3	792004	832682	700032	567024	622034	675683		774906	621580			yeast mito homolog				12	15	10	9	9	12
	P59999	Actin-related protein 2/3 complex subunit 4	ARPC4_MOUSE	Arpc4	1392196	1247091	1345996	1033309	1171899	1176970		1.32843e+06	1.12739e+06			targetP signal				12	12	11	11	12	12
	Q9CPW4	Actin-related protein 2/3 complex subunit 5	ARPC5_MOUSE	Arpc5	771194	765069	787688	610319	698151	711725		774650	673398			yeast mito homolog				14	14	13	13	13	13
	Q9D898	Actin-related protein 2/3 complex subunit 5-like protein	ARP5L_MOUSE	Arpc5l	182598	157074	154437	123452	137614	140751		164703	133939			yeast mito homolog				8	9	8	9	8	7
	P56212	cAMP-regulated phosphoprotein 19	ARP19_MOUSE	Arpp19	407157	380306	391442	308529	345491	342440		392968	332153							10	10	10	10	10	10
	Q8BWG8-2	Isoform 1B of Beta-arrestin-1	ARRB1_MOUSE	Arrb1	19295	19387	15629	9371	12972	14352		18103.7	12231.7							11	10	11	10	11	11
	Q91YI4;Q91YI4-2	Beta-arrestin-2;Isoform 2 of Beta-arrestin-2	ARRB2_MOUSE	Arrb2	114699	92949	96070	73859	84437	81641		101239	79979							25	25	22	22	22	24
	Q99KN1	Arrestin domain-containing protein 1	ARRD1_MOUSE	Arrdc1	5125	6116	4558	3424	4220	4547		5266.33	4063.67							5	6	5	6	5	6
	P50429	Arylsulfatase B	ARSB_MOUSE	Arsb	19927	17309	19531	14091	15722	15745		18922.3	15186							11	11	11	10	10	10
	C0HK79;C0HK80	Adipocyte-related X-chromosome expressed sequence 1;Adipocyte-related X-chromosome expressed sequence 2	ARXS1_MOUSE;ARXS2_MOUSE	Arxes1;Arxes2	1415	1334	1310	1160	1157	1045		1353	1120.67							2	2	2	2	2	2
	Q9WV54	Acid ceramidase	ASAH1_MOUSE	Asah1	24749	22775	19993	12611	17316	16610		22505.7	15512.3			MS/MS++				13	13	12	12	13	13
	Q9QWY8;Q9QWY8-2;Q9QWY8-3;Q9QWY8-4	Arf-GAP with SH3 domain, ANK repeat and PH domain-containing protein 1;Isoform 2 of Arf-GAP with SH3 domain, ANK repeat and PH domain-containing protein 1;Isoform 3 of Arf-GAP with SH3 domain, ANK repeat and PH domain-containing protein 1;Isoform 4 of Arf-GAP with SH3 domain, ANK repeat and PH domain-containing protein 1	ASAP1_MOUSE	Asap1	492	387	310	550	513	437		396.333	500			targetP signal, mito protein domain				4	4	5	6	5	5
	Q8K0L0;Q8K0L0-2	Ankyrin repeat and SOCS box protein 2;Isoform 2 of Ankyrin repeat and SOCS box protein 2	ASB2_MOUSE	Asb2	1031	901	812	546	740	784		914.667	690			Rickettsial homolog, mito protein domain				4	4	4	4	4	4
	Q9WV72	Ankyrin repeat and SOCS box protein 3	ASB3_MOUSE	Asb3	3386	2753	2066	1253	1840	1710		2735	1601			Rickettsial homolog, mito protein domain				4	4	4	3	4	4
	Q91ZU1	Ankyrin repeat and SOCS box protein 6	ASB6_MOUSE	Asb6	9264	7700	6889	4607	5634	5516		7951	5252.33			mito protein domain				7	7	6	7	7	7
	Q9D8Z1	Activating signal cointegrator 1 complex subunit 1	ASCC1_MOUSE	Ascc1	6080	5687	5235	3925	4792	4738		5667.33	4485			mito protein domain				6	6	6	6	6	6
	Q91WR3;Q91WR3-3	Activating signal cointegrator 1 complex subunit 2;Isoform 3 of Activating signal cointegrator 1 complex subunit 2	ASCC2_MOUSE	Ascc2	7382	6560	7497	5055	6030	5226		7146.33	5437			mito protein domain				13	14	14	14	14	14
	E9PZJ8	Activating signal cointegrator 1 complex subunit 3	ASCC3_MOUSE	Ascc3	7072	6408	5453	3516	4459	4566		6311	4180.33			Rickettsial homolog, mito protein domain				38	37	39	37	40	38
	Q9CQE6	Histone chaperone ASF1A	ASF1A_MOUSE	Asf1a	11638	16378	16206	16190	14460	11036		14740.7	13895.3							3	3	3	3	4	3
	Q9DAP7	Histone chaperone ASF1B	ASF1B_MOUSE	Asf1b	59241	62709	60810	65124	61988	65774		60920	64295.3							6	6	6	6	6	6
	Q91X20	Set1/Ash2 histone methyltransferase complex subunit ASH2	ASH2L_MOUSE	Ash2l	22490	21637	21342	21448	21632	18955		21823	20678.3			mito protein domain				19	19	17	17	19	19
	Q91YI0	Argininosuccinate lyase	ARLY_MOUSE	Asl	40422	82724	43881	30008	37119	35940		55675.7	34355.7			Rickettsial homolog, mito protein domain, coexpression				17	17	16	16	16	15
	Q61024	Asparagine synthetase [glutamine-hydrolyzing]	ASNS_MOUSE	Asns	181924	175495	170415	68765	121758	124812		175945	105112			mito protein domain				26	27	26	26	26	26
	Q8CJ27;Q8CJ27-2	Abnormal spindle-like microcephaly-associated protein homolog;Isoform 2 of Abnormal spindle-like microcephaly-associated protein homolog	ASPM_MOUSE	Aspm	145	128	176	100	96	90		149.667	95.3333							3	3	3	3	3	3
	Q8VBT9	Tether containing UBX domain for GLUT4	ASPC1_MOUSE	Aspscr1	24869	27042	28531	21497	28574	24516		26814	24862.3			targetP signal				20	20	19	20	20	20
	Q8C0M9	Isoaspartyl peptidase/L-asparaginase	ASGL1_MOUSE	Asrgl1	24301	26995	24617	21946	25545	25042		25304.3	24177.7			targetP signal				10	10	10	10	10	10
	P16460	Argininosuccinate synthase	ASSY_MOUSE	Ass1	147838	152244	156095	117759	132382	131620		152059	127254			Rickettsial homolog				23	24	21	20	22	23
	Q8BZ32	Putative Polycomb group protein ASXL2	ASXL2_MOUSE	Asxl2	1469	1603	801	575	991	1305		1291	957							2	2	2	2	2	2
	Q9D5T0	ATPase family AAA domain-containing protein 1	ATAD1_MOUSE	Atad1	60626	55441	52342	43067	47784	43469		56136.3	44773.3		MitoCarta3.0	yeast mito homolog++, Rickettsial homolog, mito protein domain, coexpression, MS/MS++	MOM	Protein import, sorting and homeostasis > Protein homeostasis > Proteases		19	19	17	17	18	19
	Q8CDM1	ATPase family AAA domain-containing protein 2	ATAD2_MOUSE	Atad2	12821	11558	10839	10858	11239	10557		11739.3	10884.7			Rickettsial homolog, mito protein domain				25	27	25	26	26	26
	E9Q166	ATPase family, AAA domain-containing 2B	E9Q166_MOUSE	Atad2b	7766	5985	6415	6567	6749	6300		6722	6538.67			Rickettsial homolog, mito protein domain				25	24	24	24	23	23
	Q925I1	ATPase family AAA domain-containing protein 3	ATAD3_MOUSE	Atad3	42050	41073	42229	37234	38575	38753		41784	38187.3		MitoCarta3.0	APEX_IMS, APEX_matrix, GFP, yeast mito homolog, Rickettsial homolog, mito protein domain+, coexpression, MS/MS++	MIM	Mitochondrial central dogma > mtDNA maintenance > mtDNA nucleoid | Mitochondrial dynamics and surveillance > Organelle contact sites | Mitochondrial dynamics and surveillance > Intramitochondrial membrane interactions		26	26	24	25	24	25
	Q4QY64	ATPase family AAA domain-containing protein 5	ATAD5_MOUSE	Atad5	3718	3825	4080	3589	3773	3617		3874.33	3659.67			mito protein domain				29	31	29	29	29	31
	Q9Z2A5-2	Isoform ATE1-2 of Arginyl-tRNA--protein transferase 1	ATE1_MOUSE	Ate1	13822	15995	15608	10894	14025	13667		15141.7	12862							8	9	9	8	9	8
	P16951	Cyclic AMP-dependent transcription factor ATF-2	ATF2_MOUSE	Atf2	1621	1723	2107	1779	1807	1540		1817	1708.67			mito protein domain				4	4	4	4	4	4
	Q8R0S1	Cyclic AMP-dependent transcription factor ATF-7	ATF7_MOUSE	Atf7	1589	1892	1579	1354	1541	1360		1686.67	1418.33							2	2	2	2	2	2
	Q7TT18	Activating transcription factor 7-interacting protein 1	MCAF1_MOUSE	Atf7ip	3345	3295	3161	2484	3014	2911		3267	2803							8	8	8	8	8	8
	Q9D8Z6	Autophagy-related protein 101	ATGA1_MOUSE	Atg101	204	368	367	329	343	0		313	224							1	2	2	2	2	Filtered
	Q9CQY1	Ubiquitin-like protein ATG12	ATG12_MOUSE	Atg12	3808	4203	6301	5165	3721	2654		4770.67	3846.67							2	2	2	2	2	2
	Q91YI1;Q91YI1-2	Autophagy-related protein 13;Isoform 2 of Autophagy-related protein 13	ATG13_MOUSE	Atg13	953	759	383	434	418	449		698.333	433.667							1	2	1	2	2	2
	Q8C0J2;Q8C0J2-2;Q8C0J2-3;Q8C0J2-4;Q8C0J2-5	Autophagy-related protein 16-1;Isoform 2 of Autophagy-related protein 16-1;Isoform 3 of Autophagy-related protein 16-1;Isoform 4 of Autophagy-related protein 16-1;Isoform 5 of Autophagy-related protein 16-1	A16L1_MOUSE	Atg16l1	310	539	596	437	524	361		481.667	440.667			targetP signal, mito protein domain				2	3	3	3	3	3
	Q6KAU8;Q6KAU8-2	Autophagy-related protein 16-2;Isoform 2 of Autophagy-related protein 16-2	A16L2_MOUSE	Atg16l2	621	438	339	252	248	324		466	274.667			mito protein domain				2	2	2	2	2	2
	Q6P4T0	Autophagy-related protein 2 homolog A	ATG2A_MOUSE	Atg2a	534	300	245	205	215	224		359.667	214.667							4	4	4	4	3	4
	Q80XK6	Autophagy-related protein 2 homolog B	ATG2B_MOUSE	Atg2b	5148	6258	6087	3607	4752	4374		5831	4244.33							13	14	13	13	14	15
	Q9CPX6	Ubiquitin-like-conjugating enzyme ATG3	ATG3_MOUSE	Atg3	58887	55408	47369	41299	41608	45648		53888	42851.7							10	10	10	10	10	10
	Q8C9S8	Cysteine protease ATG4A	ATG4A_MOUSE	Atg4a	835	1156	930	659	811	822		973.667	764							4	4	4	4	4	4
	Q8BGE6	Cysteine protease ATG4B	ATG4B_MOUSE	Atg4b	13798	12484	12030	9225	10901	9324		12770.7	9816.67							10	11	11	11	11	11
	Q99J83	Autophagy protein 5	ATG5_MOUSE	Atg5	17540	15701	15505	12915	14656	15934		16248.7	14501.7							10	10	10	10	10	10
	Q9D906	Ubiquitin-like modifier-activating enzyme ATG7	ATG7_MOUSE	Atg7	15898	15287	14853	11319	13414	11938		15346	12223.7			targetP signal, yeast mito homolog				21	20	20	20	21	21
	Q9CWJ9	Bifunctional purine biosynthesis protein ATIC	PUR9_MOUSE	Atic	612358	624682	685440	616928	644565	616156		640827	625883		mito-interacting	GFP, mito protein domain, MS/MS				43	44	38	37	39	41
	Q6PA06	Atlastin-2	ATLA2_MOUSE	Atl2	6245	6726	7249	5759	6396	6196		6740	6117							11	11	11	11	11	11
	Q91YH5	Atlastin-3	ATLA3_MOUSE	Atl3	44175	43059	40516	36154	37943	36924		42583.3	37007							24	25	23	24	24	23
	Q62388	Serine-protein kinase ATM	ATM_MOUSE	Atm	2816	2498	2299	1944	1977	2102		2537.67	2007.67			yeast mito homolog, mito protein domain				34	36	37	37	35	38
	O35126	Atrophin-1	ATN1_MOUSE	Atn1	82	87	73	77	82	91		80.6667	83.3333			induction				2	2	2	2	2	2
	O08997	Copper transport protein ATOX1	ATOX1_MOUSE	Atox1	222127	195331	212390	148515	182807	139826		209949	157049			mito protein domain, induction, MS/MS				5	5	5	5	5	5
	O54827	Probable phospholipid-transporting ATPase VA	AT10A_MOUSE	Atp10a	1553	1319	778	838	810	970		1216.67	872.667			yeast mito homolog				2	3	3	3	2	3
	Q6DFW5	Phospholipid-transporting ATPase	Q6DFW5_MOUSE	Atp11b	12516	10981	11537	8752	10317	8669		11678	9246							24	23	24	24	24	23
	Q9QZW0-2	Isoform 2 of Phospholipid-transporting ATPase 11C	AT11C_MOUSE	Atp11c	3243	3919	3556	3027	3401	3202		3572.67	3210			targetP signal				5	4	5	5	5	5
	Q9EPE9	Manganese-transporting ATPase 13A1	AT131_MOUSE	Atp13a1	25351	23009	24515	17627	21528	20120		24291.7	19758.3			yeast mito homolog, coexpression				36	36	36	35	36	36
	Q5XF89;Q5XF89-2	Probable cation-transporting ATPase 13A3;Isoform 2 of Probable cation-transporting ATPase 13A3	AT133_MOUSE	Atp13a3	2870	2369	2091	1342	1518	1487		2443.33	1449							9	9	9	9	9	9
	Q8VDN2	Sodium/potassium-transporting ATPase subunit alpha-1	AT1A1_MOUSE	Atp1a1	198568	213426	231930	171159	196923	190033		214641	186038			induction				54	55	49	49	51	53
	P97370	Sodium/potassium-transporting ATPase subunit beta-3	AT1B3_MOUSE	Atp1b3	185582	192494	233141	196451	210426	173877		203739	193585							15	16	16	16	16	16
	Q8R429	Sarcoplasmic/endoplasmic reticulum calcium ATPase 1	AT2A1_MOUSE	Atp2a1	1452	2246	2357	446	1540	1964		2018.33	1316.67							7	4	4	3	5	4
	O55143	Sarcoplasmic/endoplasmic reticulum calcium ATPase 2	AT2A2_MOUSE	Atp2a2	118546	113740	118012	83508	102705	95077		116766	93763.3			coexpression				44	43	44	44	44	43
	Q64518	Sarcoplasmic/endoplasmic reticulum calcium ATPase 3	AT2A3_MOUSE	Atp2a3	64339	62188	68640	58637	62889	54596		65055.7	58707.3							40	38	40	39	40	41
	G5E829	Plasma membrane calcium-transporting ATPase 1	AT2B1_MOUSE	Atp2b1	24220	24094	26652	23472	24641	23815		24988.7	23976							33	34	33	32	32	33
	Q6Q477	Plasma membrane calcium-transporting ATPase 4	AT2B4_MOUSE	Atp2b4	6337	6757	6732	5290	6324	5997		6608.67	5870.33							15	15	15	15	15	14
	Q80XR2	Calcium-transporting ATPase type 2C member 1	AT2C1_MOUSE	Atp2c1	1096	906	757	504	668	675		919.667	615.667							6	6	5	5	6	6
	Q64436	Potassium-transporting ATPase alpha chain 1	ATP4A_MOUSE	Atp4a	1297	603	513	465	923	488		804.333	625.333							2	2	1	1	1	1
	Q03265	ATP synthase subunit alpha, mitochondrial	ATPA_MOUSE	Atp5f1a	1844104	1803137	1785219	1538856	1705275	1668055		1810820	1.6374e+06		MitoCarta3.0	literature, APEX_matrix, targetP signal+, yeast mito homolog++, Rickettsial homolog, mito protein domain, induction, coexpression++, MS/MS++	MIM	OXPHOS > Complex V > CV subunits | OXPHOS > OXPHOS subunits		42	44	41	40	41	41
	P56480	ATP synthase subunit beta, mitochondrial	ATPB_MOUSE	Atp5f1b	2262285	2096863	2062682	1851058	1952110	1915290		2140610	1.90615e+06		MitoCarta3.0	literature, APEX_matrix, targetP signal+, yeast mito homolog++, Rickettsial homolog, mito protein domain, coexpression++, MS/MS++	MIM	OXPHOS > Complex V > CV subunits | OXPHOS > OXPHOS subunits		29	28	27	27	28	28
	Q91VR2	ATP synthase subunit gamma, mitochondrial	ATPG_MOUSE	Atp5f1c	302681	298561	304334	273733	292967	270250		301859	278983		MitoCarta3.0	literature, yeast mito homolog++, Rickettsial homolog, mito protein domain, induction, MS/MS++	MIM	OXPHOS > Complex V > CV subunits | OXPHOS > OXPHOS subunits		12	13	12	12	12	12
	Q9D3D9	ATP synthase subunit delta, mitochondrial	ATPD_MOUSE	Atp5f1d	182682	165299	180640	157851	166664	141292		176207	155269		MitoCarta3.0	literature, APEX_matrix, targetP signal, yeast mito homolog++, Rickettsial homolog, mito protein domain+, induction, coexpression++, MS/MS+	MIM	OXPHOS > Complex V > CV subunits | OXPHOS > OXPHOS subunits		5	5	5	5	5	5
	P56382	ATP synthase subunit epsilon, mitochondrial	ATP5E_MOUSE	Atp5f1e	205592	204956	239177	210031	211433	204832		216575	208765		MitoCarta3.0	literature, targetP signal, yeast mito homolog++, mito protein domain+, induction, coexpression++, MS/MS++	MIM	OXPHOS > Complex V > CV subunits | OXPHOS > OXPHOS subunits		3	3	3	3	3	3
	O35143	ATPase inhibitor, mitochondrial	ATIF1_MOUSE	ATP5IF1	207458	176524	188704	173651	176912	174105		190895	174889		MitoCarta3.0	literature, APEX_matrix, targetP signal, yeast mito homolog++, mito protein domain+, MS/MS++	Matrix	OXPHOS > Complex V > CV subunits | OXPHOS > OXPHOS subunits		9	9	7	6	7	9
	Q78IK2	ATP synthase membrane subunit DAPIT, mitochondrial	ATPMD_MOUSE	Atp5md	340810	331499	354629	340593	347231	297299		342313	328374		MitoCarta3.0	GFP, MS/MS++	MIM	OXPHOS > Complex V > CV subunits | OXPHOS > OXPHOS subunits | Mitochondrial dynamics and surveillance > Cristae formation		4	3	3	4	3	3
	Q06185	ATP synthase subunit e, mitochondrial	ATP5I_MOUSE	Atp5me	527071	545757	565546	539446	525622	517678		546125	527582		MitoCarta3.0	literature, APEX_IMS, yeast mito homolog++, mito protein domain+, coexpression++, MS/MS++	MIM	OXPHOS > Complex V > CV subunits | OXPHOS > OXPHOS subunits | Mitochondrial dynamics and surveillance > Cristae formation		5	4	6	5	5	5
	P56135	ATP synthase subunit f, mitochondrial	ATPK_MOUSE	Atp5mf	543681	552545	565406	475756	545744	546163		553877	522554		MitoCarta3.0	literature, coexpression++, MS/MS++	MIM	OXPHOS > Complex V > CV subunits | OXPHOS > OXPHOS subunits		5	5	4	5	4	5
	Q9CPQ8	ATP synthase subunit g, mitochondrial	ATP5L_MOUSE	Atp5mg	546236	506216	515843	445588	502463	501785		522765	483279		MitoCarta3.0	literature, APEX_matrix, yeast mito homolog++, mito protein domain+, MS/MS++	MIM	OXPHOS > Complex V > CV subunits | OXPHOS > OXPHOS subunits | Mitochondrial dynamics and surveillance > Cristae formation		7	7	7	7	7	7
	Q9CQQ7	ATP synthase F(0) complex subunit B1, mitochondrial	AT5F1_MOUSE	Atp5pb	201308	225298	217216	188902	180480	205006		214607	191463		MitoCarta3.0	literature, APEX_matrix, yeast mito homolog++, mito protein domain+, MS/MS++	MIM	OXPHOS > Complex V > CV subunits | OXPHOS > OXPHOS subunits		20	20	19	18	19	18
	Q9DCX2	ATP synthase subunit d, mitochondrial	ATP5H_MOUSE	Atp5pd	491650	516093	536504	478443	496817	454299		514749	476520		MitoCarta3.0	literature, APEX_matrix, yeast mito homolog++, mito protein domain+, MS/MS++	MIM	OXPHOS > Complex V > CV subunits | OXPHOS > OXPHOS subunits		16	16	15	15	15	16
	P97450	ATP synthase-coupling factor 6, mitochondrial	ATP5J_MOUSE	Atp5pf	11854	11816	13051	12542	10401	8169		12240.3	10370.7		MitoCarta3.0	literature, APEX_IMS, targetP signal, mito protein domain+, induction, coexpression++, MS/MS++	MIM	OXPHOS > Complex V > CV subunits | OXPHOS > OXPHOS subunits		5	5	5	5	4	4
	Q9DB20	ATP synthase subunit O, mitochondrial	ATPO_MOUSE	Atp5po	583895	536015	476108	415015	472375	494323		532006	460571		MitoCarta3.0	literature, APEX_matrix, targetP signal, yeast mito homolog++, Rickettsial homolog, mito protein domain+, induction, MS/MS++	MIM	OXPHOS > Complex V > CV subunits | OXPHOS > OXPHOS subunits		14	15	14	14	14	14
	Q9R1Q9	V-type proton ATPase subunit S1	VAS1_MOUSE	Atp6ap1	9538	9206	8320	5958	7414	6604		9021.33	6658.67							6	6	6	6	6	6
	Q9CYN9	Renin receptor	RENR_MOUSE	Atp6ap2	8405	15053	11546	7993	8986	10617		11668	9198.67							7	7	7	7	7	7
	Q9Z1G4;Q9Z1G4-2;Q9Z1G4-3	V-type proton ATPase 116 kDa subunit a1;Isoform A1-I of V-type proton ATPase 116 kDa subunit a1;Isoform A1-III of V-type proton ATPase 116 kDa subunit a1	VPP1_MOUSE	Atp6v0a1	429	460	303	65	167	245		397.333	159							2	2	2	2	2	2
	P15920	V-type proton ATPase 116 kDa subunit a2	VPP2_MOUSE	Atp6v0a2	8882	9272	9107	5512	7834	7351		9087	6899							12	12	12	11	10	12
	P51863	V-type proton ATPase subunit d 1	VA0D1_MOUSE	Atp6v0d1	28633	16552	16015	15244	18042	14776		20400	16020.7							9	9	9	9	9	9
	P50516	V-type proton ATPase catalytic subunit A	VATA_MOUSE	Atp6v1a	158900	157285	170438	94652	120409	133904		162208	116322			Rickettsial homolog, mito protein domain				38	38	38	35	37	37
	P62814	V-type proton ATPase subunit B, brain isoform	VATB2_MOUSE	Atp6v1b2	120482	105082	104974	71398	91894	84027		110179	82439.7			Rickettsial homolog, mito protein domain				28	27	28	27	27	27
	Q9Z1G3	V-type proton ATPase subunit C 1	VATC1_MOUSE	Atp6v1c1	46453	40715	35742	26111	31686	29534		40970	29110.3			induction				18	18	18	18	18	18
	P57746	V-type proton ATPase subunit D	VATD_MOUSE	Atp6v1d	23541	22745	24498	15774	20029	20027		23594.7	18610			induction				7	7	7	7	7	7
	P50518	V-type proton ATPase subunit E 1	VATE1_MOUSE	Atp6v1e1	77920	71807	81547	54105	65510	66403		77091.3	62006							13	12	12	11	12	12
	Q9D1K2	V-type proton ATPase subunit F	VATF_MOUSE	Atp6v1f	31034	33186	32423	23666	28511	17897		32214.3	23358							5	6	5	6	6	6
	Q9CR51	V-type proton ATPase subunit G 1	VATG1_MOUSE	Atp6v1g1	62365	61687	63136	42508	52529	54875		62396	49970.7							7	7	4	5	6	7
	Q8BVE3	V-type proton ATPase subunit H	VATH_MOUSE	Atp6v1h	33328	29466	30968	22548	31276	29623		31254	27815.7							18	20	20	20	19	20
	P98199	Phospholipid-transporting ATPase ID	AT8B2_MOUSE	Atp8b2	316	328	459	406	429	492		367.667	442.333							2	2	3	3	3	3
	A2ANX3	Phospholipid-transporting ATPase	A2ANX3_MOUSE	Atp8b4	24274	7095	11606	12530	11984	19663		14325	14725.7							9	9	10	11	11	9
	Q811I0	ATP synthase mitochondrial F1 complex assembly factor 1	ATPF1_MOUSE	Atpaf1	2849	3021	2970	2809	3011	3144		2946.67	2988							4	4	4	5	5	5
	Q91YY4	ATP synthase mitochondrial F1 complex assembly factor 2	ATPF2_MOUSE	Atpaf2	9785	9703	8446	8294	10228	8865		9311.33	9129		MitoCarta3.0	literature, targetP signal+, yeast mito homolog++, mito protein domain+, induction, coexpression, MS/MS	Matrix	OXPHOS > Complex V > CV assembly factors | OXPHOS > OXPHOS assembly factors		9	9	6	7	9	9
	Q9JKK8	Serine/threonine-protein kinase ATR	ATR_MOUSE	Atr	1310	758	614	506	635	606		894	582.333							10	11	11	11	12	12
	Q8BMG1	ATR-interacting protein	ATRIP_MOUSE	Atrip	3907	2447	1315	2107	1257	1449		2556.33	1604.33			coexpression				2	2	2	2	2	2
	Q61687	Transcriptional regulator ATRX	ATRX_MOUSE	Atrx	11802	10581	7559	6870	7936	9955		9980.67	8253.67			mito protein domain				51	49	49	51	51	51
	P54254	Ataxin-1	ATX1_MOUSE	Atxn1	2798	1883	2534	1970	2040	2353		2405	2121							4	4	4	4	5	4
	P28658	Ataxin-10	ATX10_MOUSE	Atxn10	81662	72277	72964	55265	63082	57502		75634.3	58616.3							24	24	23	24	24	24
	O70305;O70305-2;O70305-3	Ataxin-2;Isoform 2 of Ataxin-2;Isoform 3 of Ataxin-2	ATX2_MOUSE	Atxn2	777	449	430	826	804	755		552	795			targetP signal, yeast mito homolog, mito protein domain, coexpression				5	4	5	5	5	5
	Q7TQH0-2	Isoform 2 of Ataxin-2-like protein	ATX2L_MOUSE	Atxn2l	61961	66084	69019	51919	60208	58369		65688	56832			yeast mito homolog, mito protein domain				38	37	36	35	36	36
	Q9CVD2	Ataxin-3	ATX3_MOUSE	Atxn3	605	1673	2199	1161	1831	1656		1492.33	1549.33							4	3	4	4	4	4
	A2AWT3;A2AWT3-2	Ataxin-7-like protein 3;Isoform 2 of Ataxin-7-like protein 3	AT7L3_MOUSE	Atxn7l3	1168	982	1038	856	905	875		1062.67	878.667							2	2	2	2	2	2
	Q9JLZ3	Methylglutaconyl-CoA hydratase, mitochondrial	AUHM_MOUSE	Auh	27082	31158	22934	20216	24590	27312		27058	24039.3		MitoCarta3.0	literature, APEX_matrix, targetP signal, yeast mito homolog+, Rickettsial homolog, mito protein domain, induction, coexpression++, MS/MS++	Matrix	Metabolism > Carbohydrate metabolism > Itaconate metabolism | Metabolism > Amino acid metabolism > Branched-chain amino acid metabolism		9	9	9	9	9	8
	P70295	Ancient ubiquitous protein 1	AUP1_MOUSE	Aup1	28587	22532	31424	25010	25327	22974		27514.3	24437							8	8	8	8	8	8
	P97477;P97477-2	Aurora kinase A;Isoform 2 of Aurora kinase A	AURKA_MOUSE	Aurka	8796	7844	8036	6099	7224	7447		8225.33	6923.33			mito protein domain				10	10	10	10	10	10
	O70126	Aurora kinase B	AURKB_MOUSE	Aurkb	60434	44209	107480	111335	90789	70070		70707.7	90731.3			mito protein domain				16	16	15	15	15	16
	Q9D9K3	Cell death regulator Aven	AVEN_MOUSE	Aven	8408	6970	7259	6204	6922	6260		7545.67	6462							9	8	7	7	10	9
	O88398	Advillin	AVIL_MOUSE	Avil	375	469	198	0	93	127		347.333	73.3333							3	3	3	Filtered	3	3
	Q80U56	Late secretory pathway protein AVL9 homolog	AVL9_MOUSE	Avl9	2700	3071	2871	2339	2665	2529		2880.67	2511							7	8	7	7	8	7
	P01887	Beta-2-microglobulin	B2MG_MOUSE	B2m	392686	556727	424692	280170	392254	444659		458035	372361			MS/MS++				7	7	6	5	6	7
	Q91Z92	Beta-1,3-galactosyltransferase 6	B3GT6_MOUSE	B3galt6	3832	3203	3120	2267	2604	2287		3385	2386			coexpression				5	5	5	5	5	5
	P58158	Galactosylgalactosylxylosylprotein 3-beta-glucuronosyltransferase 3	B3GA3_MOUSE	B3gat3	3393	3267	3620	1029	2308	2942		3426.67	2093							3	3	3	2	3	3
	Q09200	Beta-1,4 N-acetylgalactosaminyltransferase 1	B4GN1_MOUSE	B4galnt1	61328	59057	59158	52706	56501	58046		59847.7	55751			targetP signal				21	21	19	21	21	21
	P15535;P15535-2	Beta-1,4-galactosyltransferase 1;Isoform Short of Beta-1,4-galactosyltransferase 1	B4GT1_MOUSE	B4galt1	11530	12080	9480	5743	9603	8211		11030	7852.33							6	6	6	6	6	6
	Q9JMK0	Beta-1,4-galactosyltransferase 5	B4GT5_MOUSE	B4galt5	17547	15864	20496	9366	15479	17692		17969	14179			induction				5	5	5	5	5	5
	Q8R087	Beta-1,4-galactosyltransferase 7	B4GT7_MOUSE	B4galt7	1800	1451	1322	1409	1425	1349		1524.33	1394.33			targetP signal				2	2	2	2	2	2
	Q3UI43	BRISC and BRCA1-A complex member 1	BABA1_MOUSE	Babam1	23226	21516	26357	18511	23157	22814		23699.7	21494			coexpression				9	9	9	9	9	9
	Q8K3W0	BRISC and BRCA1-A complex member 2	BABA2_MOUSE	Babam2	40345	37805	38571	29894	36848	33173		38907	33305			coexpression				15	15	15	15	16	15
	P97303;P97303-2	Transcription regulator protein BACH2;Isoform 2 of Transcription regulator protein BACH2	BACH2_MOUSE	Bach2	355	260	286	224	188	208		300.333	206.667			mito protein domain				2	2	2	2	2	2
	Q60739	BAG family molecular chaperone regulator 1	BAG1_MOUSE	Bag1	18419	20766	22394	18780	20138	19102		20526.3	19340			coexpression				13	14	14	14	14	14
	Q91YN9	BAG family molecular chaperone regulator 2	BAG2_MOUSE	Bag2	9114	8256	9101	6880	11080	8967		8823.67	8975.67			targetP signal, coexpression				4	4	4	4	4	4
	Q8CI61	BAG family molecular chaperone regulator 4	BAG4_MOUSE	Bag4	1661	1563	1266	1160	1212	1225		1496.67	1199							3	3	3	3	3	3
	Q8CI32	BAG family molecular chaperone regulator 5	BAG5_MOUSE	Bag5	20838	12382	11338	9197	9886	10529		14852.7	9870.67			yeast mito homolog				13	14	13	14	14	14
	Q9Z1R2	Large proline-rich protein BAG6	BAG6_MOUSE	Bag6	42854	40323	42575	32066	36599	34065		41917.3	34243.3			induction				32	32	31	30	30	32
	Q8BKX1;Q8BKX1-2;Q8BKX1-3;Q8BKX1-4	Brain-specific angiogenesis inhibitor 1-associated protein 2;Isoform 2 of Brain-specific angiogenesis inhibitor 1-associated protein 2;Isoform 3 of Brain-specific angiogenesis inhibitor 1-associated protein 2;Isoform 4 of Brain-specific angiogenesis inhibitor 1-associated protein 2	BAIP2_MOUSE	Baiap2	7001	6158	6252	4089	5447	5587		6470.33	5041			mito protein domain				11	11	10	10	11	10
	O08734	Bcl-2 homologous antagonist/killer	BAK_MOUSE	Bak1	97123	91359	74504	57324	70762	64197		87662	64094.3		MitoCarta3.0	literature, mito protein domain, MS/MS++	MOM	Mitochondrial dynamics and surveillance > Apoptosis		11	10	10	10	10	10
	O54962	Barrier-to-autointegration factor	BAF_MOUSE	Banf1	163005	147298	144905	131097	124736	79718		151736	111850							7	7	5	5	6	6
	Q8VBU8;Q8VBU8-2;Q8VBU8-3;Q8VBU8-4	Protein BANP;Isoform 2 of Protein BANP;Isoform 3 of Protein BANP;Isoform 4 of Protein BANP	BANP_MOUSE	Banp	1380	965	1008	1114	1070	1166		1117.67	1116.67							4	4	5	5	5	5
	Q9DCT6-2	Isoform 2 of Chromatin complexes subunit BAP18	BAP18_MOUSE	Bap18	43747	47971	47902	44948	44121	41625		46540	43564.7							8	8	7	7	8	8
	O70445	BRCA1-associated RING domain protein 1	BARD1_MOUSE	Bard1	121	137	152	150	144	126		136.667	140			targetP signal, Rickettsial homolog, mito protein domain				2	2	2	2	2	2
	Q91XV3	Brain acid soluble protein 1	BASP1_MOUSE	Basp1	30382	34391	72058	12468	32137	56260		45610.3	33621.7							10	12	12	10	12	12
	Q07813	Apoptosis regulator BAX	BAX_MOUSE	Bax	218322	225789	249539	224491	236556	212356		231217	224468		MitoCarta3.0	literature, mito protein domain, coexpression, MS/MS++	MOM	Mitochondrial dynamics and surveillance > Apoptosis		10	10	9	9	9	10
	O88379	Bromodomain adjacent to zinc finger domain protein 1A	BAZ1A_MOUSE	Baz1a	19566	17214	17538	13761	15392	15037		18106	14730							43	43	41	40	42	42
	Q9Z277	Tyrosine-protein kinase BAZ1B	BAZ1B_MOUSE	Baz1b	52202	49967	53105	51786	50136	48269		51758	50063.7							73	76	71	71	74	74
	Q91YE5;Q91YE5-2;Q91YE5-3	Bromodomain adjacent to zinc finger domain protein 2A;Isoform 2 of Bromodomain adjacent to zinc finger domain protein 2A;Isoform 3 of Bromodomain adjacent to zinc finger domain protein 2A	BAZ2A_MOUSE	Baz2a	1727	1778	1466	1277	1812	1768		1657	1619							11	11	11	11	11	11
	Q61334	B-cell receptor-associated protein 29	BAP29_MOUSE	Bcap29	37394	38197	36259	26105	31725	28883		37283.3	28904.3							13	13	12	11	11	11
	Q61335	B-cell receptor-associated protein 31	BAP31_MOUSE	Bcap31	113312	120436	123932	97611	107934	100770		119227	102105							16	16	14	15	17	16
	Q9D287	Pre-mRNA-splicing factor SPF27	SPF27_MOUSE	Bcas2	73389	80110	77825	63031	78471	63008		77108	68170							16	17	15	15	16	15
	Q8CCN5	Breast carcinoma-amplified sequence 3 homolog	BCAS3_MOUSE	Bcas3	652	700	736	707	676	659		696	680.667							6	6	6	7	6	6
	P24288	Branched-chain-amino-acid aminotransferase, cytosolic	BCAT1_MOUSE	Bcat1	37844	37310	40494	21407	31981	29806		38549.3	27731.3			targetP signal, yeast mito homolog++, Rickettsial homolog, mito protein domain, MS/MS				13	13	12	13	12	13
	O35855	Branched-chain-amino-acid aminotransferase, mitochondrial	BCAT2_MOUSE	Bcat2	55266	48186	60129	43445	50952	48449		54527	47615.3		MitoCarta3.0	literature, APEX_matrix, targetP signal, Rickettsial homolog, mito protein domain, coexpression, MS/MS++	Matrix	Metabolism > Amino acid metabolism > Branched-chain amino acid metabolism		16	17	16	15	16	15
	Q9CWI3	BRCA2 and CDKN1A-interacting protein	BCCIP_MOUSE	Bccip	48062	47579	45678	38385	40995	40098		47106.3	39826			coexpression				14	14	14	14	14	14
	P50136	2-oxoisovalerate dehydrogenase subunit alpha, mitochondrial	ODBA_MOUSE	Bckdha	1531	1593	1892	1799	1875	1673		1672	1782.33							5	3	6	6	6	6
	Q6P3A8;Q6P3A8-2	2-oxoisovalerate dehydrogenase subunit beta, mitochondrial;Isoform 2 of 2-oxoisovalerate dehydrogenase subunit beta, mitochondrial	ODBB_MOUSE	Bckdhb	776	155	368	332	417	543		433	430.667		MitoCarta3.0	literature, APEX_matrix, yeast mito homolog+, Rickettsial homolog, mito protein domain+, coexpression+, MS/MS++	MIM	Metabolism > Amino acid metabolism > Branched-chain amino acid metabolism | Metabolism > Amino acid metabolism > Branched-chain amino acid dehydrogenase complex		3	2	2	3	3	3
	O55028	[3-methyl-2-oxobutanoate dehydrogenase [lipoamide]] kinase, mitochondrial	BCKD_MOUSE	Bckdk	6703	4480	4288	4307	4702	3882		5157	4297		MitoCarta3.0	literature, APEX_matrix, targetP signal, yeast mito homolog+, Rickettsial homolog, mito protein domain+, MS/MS++	Matrix	Metabolism > Amino acid metabolism > Branched-chain amino acid metabolism | Metabolism > Amino acid metabolism > Branched-chain amino acid dehydrogenase complex		8	8	9	8	9	9
	Q9Z0H7	B-cell lymphoma/leukemia 10	BCL10_MOUSE	Bcl10	17536	15854	16860	12714	15223	14832		16750	14256.3			mito protein domain				7	7	7	7	7	7
	Q99PV8;Q99PV8-2	B-cell lymphoma/leukemia 11B;Isoform 2 of B-cell lymphoma/leukemia 11B	BC11B_MOUSE	Bcl11b	3945	4477	4933	5195	5534	5773		4451.67	5500.67							17	18	17	16	18	17
	P10417	Apoptosis regulator Bcl-2	BCL2_MOUSE	Bcl2	54180	44357	34297	28726	35005	35515		44278	33082		MitoCarta3.0	literature, mito protein domain	MOM	Mitochondrial dynamics and surveillance > Apoptosis		6	6	6	6	6	6
	Q64373;Q64373-2;Q64373-3;Q64373-4	Bcl-2-like protein 1;Isoform Bcl-X(S) of Bcl-2-like protein 1;Isoform Bcl-X(beta) of Bcl-2-like protein 1;Isoform Bcl-X(delta-TM) of Bcl-2-like protein 1	B2CL1_MOUSE	Bcl2l1	29050	26559	23114	20131	21236	22617		26241	21328		MitoCarta3.0	literature, mito protein domain	MOM	Mitochondrial dynamics and surveillance > Apoptosis		7	7	7	7	7	7
	O54918	Bcl-2-like protein 11	B2L11_MOUSE	Bcl2l11	5186	5063	5396	4816	5481	5929		5215	5408.67		MitoCarta3.0	manual, targetP signal	MOM	Mitochondrial dynamics and surveillance > Apoptosis		5	5	6	6	6	6
	P59017	Bcl-2-like protein 13	B2L13_MOUSE	Bcl2l13	17955	17484	19073	15073	17303	14015		18170.7	15463.7		MitoCarta3.0	literature, mito protein domain, coexpression, MS/MS+	MOM	Mitochondrial dynamics and surveillance > Mitophagy | Mitochondrial dynamics and surveillance > Autophagy | Mitochondrial dynamics and surveillance > Apoptosis		13	13	12	13	13	12
	Q921K9	B-cell CLL/lymphoma 7 protein family member B	BCL7B_MOUSE	Bcl7b	19713	17241	18598	17473	18788	17957		18517.3	18072.7							3	3	3	3	3	3
	O08664	B-cell CLL/lymphoma 7 protein family member C	BCL7C_MOUSE	Bcl7c	15728	16057	16515	15343	15970	15197		16100	15503.3							3	3	3	3	3	3
	Q8K019;Q8K019-2	Bcl-2-associated transcription factor 1;Isoform 2 of Bcl-2-associated transcription factor 1	BCLF1_MOUSE	Bclaf1	34456	33989	39075	32683	36014	35018		35840	34571.7							31	31	30	30	32	31
	Q8CGN4;Q8CGN4-2;Q8CGN4-3;Q8CGN4-4	BCL-6 corepressor;Isoform 2 of BCL-6 corepressor;Isoform 3 of BCL-6 corepressor;Isoform 4 of BCL-6 corepressor	BCOR_MOUSE	Bcor	1045	906	820	446	426	926		923.667	599.333			Rickettsial homolog, mito protein domain				7	7	7	6	6	7
	Q6PAJ1	Breakpoint cluster region protein	BCR_MOUSE	Bcr	4016	3976	3931	1850	2883	2975		3974.33	2569.33			yeast mito homolog, mito protein domain				16	16	16	16	16	15
	Q9CZP5	Mitochondrial chaperone BCS1	BCS1_MOUSE	Bcs1l	15119	8245	9809	8949	9507	10256		11057.7	9570.67		MitoCarta3.0	literature, APEX_matrix, yeast mito homolog++, Rickettsial homolog, mito protein domain+, coexpression+, MS/MS+	MIM	OXPHOS > Complex III > CIII assembly factors | OXPHOS > OXPHOS assembly factors		8	8	8	8	8	8
	Q80XN0	D-beta-hydroxybutyrate dehydrogenase, mitochondrial	BDH_MOUSE	Bdh1	105783	94065	100991	87606	96219	88052		100280	90625.7		MitoCarta3.0	literature, APEX_matrix, targetP signal+, Rickettsial homolog, mito protein domain, induction, coexpression, MS/MS++	MIM	Metabolism > Carbohydrate metabolism > Ketone metabolism		14	13	13	13	14	14
	O88597	Beclin-1	BECN1_MOUSE	Becn1	4013	3494	5676	2163	4024	3059		4394.33	3082							5	5	5	4	5	5
	Q6PAL0	BEN domain-containing protein 3	BEND3_MOUSE	Bend3	54	84	93	86	91	66		77	81							1	3	3	3	3	3
	O35623	BET1 homolog	BET1_MOUSE	Bet1	1949	12441	14231	11330	11080	13252		9540.33	11887.3							1	2	2	2	2	2
	O35185	Class E basic helix-loop-helix protein 40	BHE40_MOUSE	Bhlhe40	3926	3461	3223	2376	2869	2588		3536.67	2611			mito protein domain				5	5	5	5	5	5
	Q921C5;Q921C5-2	Protein bicaudal D homolog 2;Isoform 2 of Protein bicaudal D homolog 2	BICD2_MOUSE	Bicd2	15783	14446	15479	10186	12489	12145		15236	11606.7							28	28	28	26	28	28
	F8VPZ9	BRD4-interacting chromatin-remodeling complex-associated protein	BICRA_MOUSE	Bicra	86	72	93	158	176	157		83.6667	163.667							3	2	3	4	4	4
	P70444	BH3-interacting domain death agonist	BID_MOUSE	Bid	14397	11676	11604	12029	11829	10932		12559	11596.7		MitoCarta3.0	literature, mito protein domain, coexpression	MOM	Mitochondrial dynamics and surveillance > Apoptosis		5	6	6	5	4	6
	O08539-2	Isoform 2 of Myc box-dependent-interacting protein 1	BIN1_MOUSE	Bin1	73615	78889	81276	57187	66677	66525		77926.7	63463			mito protein domain				21	23	20	21	20	21
	D3Z6Q9	Bridging integrator 2	BIN2_MOUSE	Bin2	100281	126142	132999	97117	111120	96014		119807	101417							21	22	20	19	21	21
	Q62210	Baculoviral IAP repeat-containing protein 2	BIRC2_MOUSE	Birc2	1669	1473	1678	1276	1881	2092		1606.67	1749.67			yeast mito homolog, mito protein domain, MS/MS				3	3	3	3	3	3
	O70201	Baculoviral IAP repeat-containing protein 5	BIRC5_MOUSE	Birc5	15969	14839	22997	21530	20941	9255		17935	17242							6	6	7	6	6	6
	O88738;O88738-2;O88738-3	Baculoviral IAP repeat-containing protein 6;Isoform 2 of Baculoviral IAP repeat-containing protein 6;Isoform 3 of Baculoviral IAP repeat-containing protein 6	BIRC6_MOUSE	Birc6	14579	13621	12876	8974	11338	11263		13692	10525							103	104	101	101	104	103
	Q8VD62	UPF0696 protein C11orf68 homolog	CK068_MOUSE	Bles03	14653	13226	17418	14790	14752	13371		15099	14304.3							7	6	7	8	8	7
	O88700	Bloom syndrome protein homolog	BLM_MOUSE	Blm	307	327	270	250	224	196		301.333	223.333			Rickettsial homolog, mito protein domain				3	4	4	4	4	4
	Q8R016	Bleomycin hydrolase	BLMH_MOUSE	Blmh	149330	149672	148854	122810	127690	129290		149285	126597			yeast mito homolog				30	31	29	29	31	31
	O55102	Biogenesis of lysosome-related organelles complex 1 subunit 1	BL1S1_MOUSE	Bloc1s1	5836	5571	7431	6112	7409	6139		6279.33	6553.33		MitoCarta3.0	mito protein domain, coexpression++, MS/MS	unknown	Signaling		2	2	2	2	2	2
	Q5U5M8	Biogenesis of lysosome-related organelles complex 1 subunit 3	BL1S3_MOUSE	Bloc1s3	1217	1611	1188	904	1155	992		1338.67	1017							1	2	2	2	2	2
	Q8VED2	Biogenesis of lysosome-related organelles complex 1 subunit 4	BL1S4_MOUSE	Bloc1s4	4187	3276	3121	2482	2839	2688		3528	2669.67							3	3	3	3	3	3
	Q8R015	Biogenesis of lysosome-related organelles complex 1 subunit 5	BL1S5_MOUSE	Bloc1s5	1391	2677	2681	2189	2417	2506		2249.67	2370.67			induction, coexpression				2	3	3	3	3	3
	Q9R0C0	Biogenesis of lysosome-related organelles complex 1 subunit 6	BL1S6_MOUSE	Bloc1s6	4222	2381	2194	1349	2226	2346		2932.33	1973.67							2	2	2	2	2	2
	Q9CY64	Biliverdin reductase A	BIEA_MOUSE	Blvra	139751	129320	135231	96623	111915	110688		134767	106409							16	16	15	15	16	16
	Q923D2	Flavin reductase (NADPH)	BLVRB_MOUSE	Blvrb	2652	2220	2127	1548	2111	1936		2333	1865			mito protein domain				2	3	3	2	2	2
	Q91Z96	BMP-2-inducible protein kinase	BMP2K_MOUSE	Bmp2k	3054	4272	3511	3155	3326	3377		3612.33	3286			mito protein domain				10	13	12	12	12	13
	Q6PGF5	BMS1 homolog, ribosome assembly protein (Yeast)	Q6PGF5_MOUSE	Bms1	23085	21559	21254	17449	20257	20090		21966	19265.3			yeast mito homolog				34	32	32	31	34	35
	Q6QD59	Vesicle transport protein SEC20	SEC20_MOUSE	Bnip1	35193	33901	32729	11672	28663	28338		33941	22891			mito protein domain, coexpression				6	7	6	7	6	7
	O54940	BCL2/adenovirus E1B 19 kDa protein-interacting protein 2	BNIP2_MOUSE	Bnip2	7337	6714	5843	3863	4585	4830		6631.33	4426			mito protein domain, induction				5	5	5	5	5	5
	O55003	BCL2/adenovirus E1B 19 kDa protein-interacting protein 3	BNIP3_MOUSE	Bnip3	28681	29162	30417	24705	30710	24326		29420	26580.3		MitoCarta3.0	literature, mito protein domain+, MS/MS	MOM	Mitochondrial dynamics and surveillance > Apoptosis		2	2	2	2	2	2
	E9Q6J5;E9Q6J5-3	Biorientation of chromosomes in cell division protein 1-like 1;Isoform New of Biorientation of chromosomes in cell division protein 1-like 1	BD1L1_MOUSE	Bod1l	3558	3300	2264	3246	3654	2588		3040.67	3162.67							33	30	32	33	31	32
	Q9D8S9	BolA-like protein 1	BOLA1_MOUSE	Bola1	66160	65361	70906	57391	66374	58564		67475.7	60776.3		MitoCarta3.0	GFP, targetP signal+, Rickettsial homolog, mito protein domain, coexpression, MS/MS++	Matrix	Metabolism > Metals and cofactors > Fe-S cluster biosynthesis | Metabolism > Metals and cofactors > Fe-S-containing proteins		7	7	7	7	7	7
	Q8BGS2	BolA-like protein 2	BOLA2_MOUSE	Bola2	152645	156437	153465	99801	129511	98515		154182	109276			mito protein domain, coexpression				7	7	7	7	7	7
	Q8CEI1	BolA-like protein 3	BOLA3_MOUSE	Bola3	5948	6814	6942	4249	4574	4527		6568	4450		MitoCarta3.0	targetP signal, mito protein domain, MS/MS	Matrix	Metabolism > Metals and cofactors > Fe-S cluster biosynthesis | Metabolism > Metals and cofactors > Fe-S-containing proteins		2	3	3	3	2	3
	P97452	Ribosome biogenesis protein BOP1	BOP1_MOUSE	Bop1	60122	82502	89128	70622	75253	71357		77250.7	72410.7			mito protein domain, coexpression				32	33	32	31	33	33
	Q8BS90	Protein aurora borealis	BORA_MOUSE	Bora	476	263	380	223	230	591		373	348							2	2	2	2	2	2
	Q9D920	BLOC-1-related complex subunit 5	BORC5_MOUSE	Borcs5	15373	11292	15600	13555	12995	13214		14088.3	13254.7			targetP signal				3	3	3	3	3	3
	Q8R164	Valacyclovir hydrolase	BPHL_MOUSE	Bphl	1290	1224	1198	1267	1060	984		1237.33	1103.67		MitoCarta3.0	targetP signal, Rickettsial homolog, mito protein domain, coexpression, MS/MS++	Matrix	Metabolism > Detoxification > Xenobiotic metabolism		4	4	4	4	4	4
	Q9Z0S1	3'(2'),5'-bisphosphate nucleotidase 1	BPNT1_MOUSE	Bpnt1	43531	30638	33984	21363	53020	30502		36051	34961.7			Rickettsial homolog, MS/MS+				15	15	15	15	14	15
	Q80V26	Golgi-resident adenosine 3',5'-bisphosphate 3'-phosphatase	IMPA3_MOUSE	Bpnt2	3413	3490	3309	3491	3487	3110		3404	3362.67			Rickettsial homolog				6	5	6	5	6	6
	A2A654;A2A655;E9Q6A7	Bromodomain PHD finger transcription factor	A2A654_MOUSE;A2A655_MOUSE;E9Q6A7_MOUSE	Bptf	4448	2431	2760	2534	2596	2126		3213	2418.67							31	32	33	33	31	32
	Q99MP8;Q99MP8-2	BRCA1-associated protein;Isoform 2 of BRCA1-associated protein	BRAP_MOUSE	Brap	3072	3371	3130	2595	3117	2901		3191	2871			mito protein domain				10	10	10	10	10	10
	Q8C3R1	BRCA1-associated ATM activator 1	BRAT1_MOUSE	Brat1	6110	5703	5044	3975	3923	4385		5619	4094.33							15	16	16	16	16	16
	P48754	Breast cancer type 1 susceptibility protein homolog	BRCA1_MOUSE	Brca1	749	546	588	557	588	564		627.667	569.667			mito protein domain				9	8	8	9	9	10
	P46737	Lys-63-specific deubiquitinase BRCC36	BRCC3_MOUSE	Brcc3	23454	22701	24530	19792	22217	21169		23561.7	21059.3			yeast mito homolog				10	12	13	13	13	13
	G5E8P1-2	Isoform 2 of Bromodomain-containing protein 1	BRD1_MOUSE	Brd1	1609	1587	1357	1268	1436	1381		1517.67	1361.67							11	11	11	11	11	10
	Q7JJ13	Bromodomain-containing protein 2	BRD2_MOUSE	Brd2	10221	10248	11498	10207	10723	10233		10655.7	10387.7							21	21	21	21	20	21
	Q8K2F0	Bromodomain-containing protein 3	BRD3_MOUSE	Brd3	4936	4305	5058	4925	5297	4933		4766.33	5051.67							9	8	9	9	9	9
	Q9ESU6	Bromodomain-containing protein 4	BRD4_MOUSE	Brd4	18232	16132	18478	16975	19412	18303		17614	18230							27	28	27	27	28	26
	O88665	Bromodomain-containing protein 7	BRD7_MOUSE	Brd7	2598	2231	3097	2846	3074	2781		2642	2900.33			induction, coexpression				8	8	9	9	9	9
	Q8R3B7;Q8R3B7-2	Bromodomain-containing protein 8;Isoform 2 of Bromodomain-containing protein 8	BRD8_MOUSE	Brd8	2852	2988	2691	2744	3088	3319		2843.67	3050.33			yeast mito homolog				7	7	7	8	8	7
	Q3UQU0	Bromodomain-containing protein 9	BRD9_MOUSE	Brd9	6813	6547	6195	5810	7577	6870		6518.33	6752.33							10	8	10	10	10	11
	Q8CFK2	Transcription factor IIIB 90 kDa subunit	TF3B_MOUSE	Brf1	276	1597	1872	947	1184	2346		1248.33	1492.33							2	4	4	4	4	4
	Q8BXV2	BRI3-binding protein	BRI3B_MOUSE	Bri3bp	27784	30825	33519	25372	29520	27316		30709.3	27402.7			coexpression				3	3	3	3	3	3
	Q5SXJ3	Fanconi anemia group J protein homolog	FANCJ_MOUSE	Brip1	1815	1156	1187	1077	1277	1183		1386	1179							8	9	8	8	9	8
	Q9DCA5	Ribosome biogenesis protein BRX1 homolog	BRX1_MOUSE	Brix1	146159	122763	86867	125364	103498	101726		118596	110196							17	17	16	16	16	17
	Q99N20	Breast cancer metastasis-suppressor 1 homolog	BRMS1_MOUSE	Brms1	2756	1844	1794	2198	2454	2089		2131.33	2247							4	4	3	4	4	4
	Q8K2Q7	BRO1 domain-containing protein BROX	BROX_MOUSE	Brox	22701	22878	25393	19041	22865	20387		23657.3	20764.3							9	10	9	9	9	9
	B2RRD7	Peregrin	BRPF1_MOUSE	Brpf1	564	475	440	374	421	416		493	403.667							3	3	3	3	3	3
	Q921C3;Q921C3-2	Bromodomain and WD repeat-containing protein 1;Isoform B of Bromodomain and WD repeat-containing protein 1	BRWD1_MOUSE	Brwd1	130	76	50	67	51	52		85.3333	56.6667			mito protein domain				2	2	3	3	3	3
	Q9Z2E9	Seipin	BSCL2_MOUSE	Bscl2	1366487	175409	1117267	266133	635656	281488		886388	394426			coexpression				2	2	1	1	2	1
	Q80Y55	BSD domain-containing protein 1	BSDC1_MOUSE	Bsdc1	71	489	582	694	581	1035		380.667	770			coexpression				1	1	2	2	2	2
	P18572;P18572-2	Basigin;Isoform 2 of Basigin	BASI_MOUSE	Bsg	111869	133676	128551	75514	102087	101774		124699	93125			induction, coexpression				10	11	10	10	10	10
	Q80YW5;Q80YW5-2	B box and SPRY domain-containing protein;Isoform 2 of B box and SPRY domain-containing protein	BSPRY_MOUSE	Bspry	2212	2501	2213	1728	1672	1752		2308.67	1717.33			mito protein domain				6	7	6	6	6	7
	Q8R2Q8	Bone marrow stromal antigen 2	BST2_MOUSE	Bst2	8866	9583	8828	6012	8158	7479		9092.33	7216.33							4	4	4	4	4	4
	E9QAE3	B-TFIID TATA-box-binding protein-associated factor 1	E9QAE3_MOUSE	Btaf1	11535	10385	9766	7653	8771	8462		10562	8295.33			yeast mito homolog, mito protein domain				43	41	42	44	42	44
	P58544	BTB/POZ domain-containing protein 1	BTBD1_MOUSE	Btbd1	3428	3190	3353	3182	2956	3288		3323.67	3142							3	3	3	3	3	3
	Q8CIF4	Biotinidase	BTD_MOUSE	Btd	2260	2037	2382	1716	2134	1801		2226.33	1883.67			yeast mito homolog, mito protein domain, coexpression				3	3	3	3	3	3
	Q64152	Transcription factor BTF3	BTF3_MOUSE	Btf3	450285	449388	466549	362441	455908	484682		455407	434344							14	14	14	13	13	13
	Q9CQH7	Transcription factor BTF3 homolog 4	BT3L4_MOUSE	Btf3l4	34289	30964	42258	39464	40788	28657		35837	36303							8	9	9	9	9	9
	O08901	Mitotic checkpoint serine/threonine-protein kinase BUB1	BUB1_MOUSE	Bub1	937	799	820	973	1033	1019		852	1008.33			mito protein domain				6	5	5	6	6	6
	Q9Z1S0	Mitotic checkpoint serine/threonine-protein kinase BUB1 beta	BUB1B_MOUSE	Bub1b	7620	7675	6980	7097	7303	7009		7425	7136.33			mito protein domain				22	21	21	22	22	22
	Q9WVA3	Mitotic checkpoint protein BUB3	BUB3_MOUSE	Bub3	218275	233122	243321	214483	220870	209249		231573	214867			mito protein domain				15	15	15	15	15	15
	Q8R149;Q8R149-2	BUD13 homolog;Isoform 2 of BUD13 homolog	BUD13_MOUSE	Bud13	1535	1610	1907	1609	1745	1657		1684	1670.33							5	5	5	5	5	5
	Q9CY21	Probable 18S rRNA (guanine-N(7))-methyltransferase	BUD23_MOUSE	Bud23	18825	17811	18791	14984	17548	17017		18475.7	16516.3			mito protein domain				6	6	6	6	6	6
	Q6PGH1	Protein BUD31 homolog	BUD31_MOUSE	Bud31	202520	177144	165998	121918	139224	151069		181887	137404							13	13	12	12	12	13
	O54825	Bystin	BYST_MOUSE	Bysl	81150	74278	74598	58560	66538	65163		76675.3	63420.3			coexpression				23	23	23	23	21	22
	Q9CQC6	Basic leucine zipper and W2 domain-containing protein 1	BZW1_MOUSE	Bzw1	266113	261838	284976	208959	238869	234156		270976	227328							25	25	23	24	24	25
	Q91VK1	Basic leucine zipper and W2 domain-containing protein 2	BZW2_MOUSE	Bzw2	146340	163791	86494	116254	87132	134068		132208	112485			induction, coexpression				23	24	23	23	22	24
	O35473	Nuclear nucleic acid-binding protein C1D	C1D_MOUSE	C1d	2208	2981	1320	1131	1579	1945		2169.67	1551.67							2	2	2	2	2	2
	Q9JJ06	Glycoprotein-N-acetylgalactosamine 3-beta-galactosyltransferase 1	C1GLT_MOUSE	C1galt1	4536	5108	4906	3293	4010	4118		4850	3807							3	3	3	3	3	3
	Q9JMG2	C1GALT1-specific chaperone 1	C1GLC_MOUSE	C1galt1c1	5250	5093	3606	2796	3612	3766		4649.67	3391.33							6	5	4	5	5	5
	O35658	Complement component 1 Q subcomponent-binding protein, mitochondrial	C1QBP_MOUSE	C1qbp	226190	241083	244457	216978	229367	218545		237243	221630							9	8	8	9	7	8
	Q80X80	Phospholipid transfer protein C2CD2L	C2C2L_MOUSE	C2cd2l	371	336	243	177	214	240		316.667	210.333							2	2	2	2	2	2
	Q7TPS5	C2 domain-containing protein 5	C2CD5_MOUSE	C2cd5	2245	1997	1641	1445	1636	2024		1961	1701.67							12	11	11	11	11	12
	P01027	Complement C3	CO3_MOUSE	C3	43366	47246	43641	19689	32708	37062		44751	29819.7			MS/MS++				14	14	14	14	14	14
	P01029	Complement C4-B	CO4B_MOUSE	C4b	1974	2073	1351	696	1095	1316		1799.33	1035.67							3	3	3	3	3	3
	P00920	Carbonic anhydrase 2	CAH2_MOUSE	Ca2	8484	4926	8787	6778	9043	7821		7399	7880.67			mito protein domain, induction				6	6	5	3	4	5
	Q8VDY9	Caspase activity and apoptosis inhibitor 1	CAAP1_MOUSE	Caap1	941	849	1048	822	1033	858		946	904.333							2	2	2	2	2	2
	Q06138	Calcium-binding protein 39	CAB39_MOUSE	Cab39	108622	102460	108875	79499	86913	92072		106652	86161.3			induction				17	19	17	17	17	17
	Q9DB16	Calcium-binding protein 39-like	CB39L_MOUSE	Cab39l	60154	64815	57002	48235	52725	40968		60657	47309.3							5	5	5	5	5	5
	Q9CS00	Cactin	CATIN_MOUSE	Cactin	8502	9568	9406	4191	5159	10248		9158.67	6532.67							11	11	11	11	11	11
	Q8R0X2	CDK2-associated and cullin domain-containing protein 1	CACL1_MOUSE	Cacul1	4862	4934	5531	3951	5174	4621		5109	4582							6	5	5	5	6	5
	Q9CXW3	Calcyclin-binding protein	CYBP_MOUSE	Cacybp	1365662	1306400	790677	432783	987094	1191873		1.15425e+06	870583			coexpression				20	20	20	21	20	20
	B2RQC6	CAD protein	PYR1_MOUSE	Cad	214501	202169	192147	161847	184367	177218		202939	174477			yeast mito homolog, Rickettsial homolog, mito protein domain				106	107	105	105	106	108
	Q8VEC4	Calcium homeostasis modulator protein 2	CAHM2_MOUSE	Calhm2	0	1644	156	209	601	803		600	537.667							Filtered	2	1	2	2	2
	Q8C9E8	Calcium homeostasis modulator protein 6	CAHM6_MOUSE	Calhm6	8628	7604	2307	2724	8151	2275		6179.67	4383.33							4	4	3	4	4	4
	P0DP26;P0DP27;P0DP28	Calmodulin-1;Calmodulin-2;Calmodulin-3	CALM1_MOUSE;CALM2_MOUSE;CALM3_MOUSE	Calm1;Calm2;Calm3	202578	255790	271935	193515	234518	142658		243434	190230							11	12	10	10	11	13
	P14211	Calreticulin	CALR_MOUSE	Calr	1996332	2120209	1993130	1266678	1642660	1606463		2036557	1505267							36	35	33	33	34	36
	O35887	Calumenin	CALU_MOUSE	Calu	78192	82060	98079	73800	80310	76848		86110.3	76986			mito protein domain				18	18	17	18	18	18
	Q8BW96;Q8BW96-2	Calcium/calmodulin-dependent protein kinase type 1D;Isoform 2 of Calcium/calmodulin-dependent protein kinase type 1D	KCC1D_MOUSE	Camk1d	2644	3859	4190	3742	4500	3913		3564.33	4051.67			mito protein domain				7	9	9	10	10	11
	Q6PHZ2	Calcium/calmodulin-dependent protein kinase type II subunit delta	KCC2D_MOUSE	Camk2d	5416	6513	6983	6735	5627	5436		6304	5932.67			mito protein domain				7	8	9	9	8	9
	Q923T9;Q923T9-2	Calcium/calmodulin-dependent protein kinase type II subunit gamma;Isoform 2 of Calcium/calmodulin-dependent protein kinase type II subunit gamma	KCC2G_MOUSE	Camk2g	25065	24483	26332	21633	23734	23455		25293.3	22940.7			mito protein domain				16	16	16	16	16	16
	P08414	Calcium/calmodulin-dependent protein kinase type IV	KCC4_MOUSE	Camk4	34529	34546	35415	27267	30945	29269		34830	29160.3							22	22	22	21	22	22
	Q6ZQ38	Cullin-associated NEDD8-dissociated protein 1	CAND1_MOUSE	Cand1	178581	139280	156052	120972	125943	138328		157971	128414							61	65	58	60	61	62
	Q6ZQ73	Cullin-associated NEDD8-dissociated protein 2	CAND2_MOUSE	Cand2	886	684	568	517	598	453		712.667	522.667							6	6	6	6	5	6
	P35564	Calnexin	CALX_MOUSE	Canx	577554	532192	624441	435997	516232	545296		578062	499175		mito-interacting					46	46	45	45	43	46
	P40124	Adenylyl cyclase-associated protein 1	CAP1_MOUSE	Cap1	1030860	1059852	1003138	774373	863727	849005		1.03128e+06	829035							42	41	38	40	40	40
	P24452	Macrophage-capping protein	CAPG_MOUSE	Capg	249032	256710	245381	142674	192184	205433		250374	180097							10	10	10	10	10	10
	O35350	Calpain-1 catalytic subunit	CAN1_MOUSE	Capn1	87498	89535	87501	73330	79300	77313		88178	76647.7							42	44	42	41	40	42
	O08529	Calpain-2 catalytic subunit	CAN2_MOUSE	Capn2	223977	241773	250532	133058	178424	179748		238761	163743							41	40	38	39	39	39
	Q9R1S8	Calpain-7	CAN7_MOUSE	Capn7	1992	1706	1174	1106	1231	1019		1624	1118.67							8	8	7	8	8	7
	O88456	Calpain small subunit 1	CPNS1_MOUSE	Capns1	247912	270604	294170	169674	243781	202037		270895	205164			mito protein domain				13	13	12	12	13	12
	Q60865	Caprin-1	CAPR1_MOUSE	Caprin1	114521	104697	122284	91055	101826	100117		113834	97666							20	20	19	19	19	19
	P47753	F-actin-capping protein subunit alpha-1	CAZA1_MOUSE	Capza1	837143	730062	838636	607921	702324	728898		801947	679714							16	18	14	14	15	16
	P47754	F-actin-capping protein subunit alpha-2	CAZA2_MOUSE	Capza2	383155	382048	407481	285495	344574	344089		390895	324719							16	16	14	15	16	16
	P47757-2	Isoform 2 of F-actin-capping protein subunit beta	CAPZB_MOUSE	Capzb	1156982	1167294	1225599	917329	1054713	996534		1.18329e+06	989525							28	28	25	25	26	26
	Q8CIS0;Q8CIS0-2	Caspase recruitment domain-containing protein 11;Isoform 2 of Caspase recruitment domain-containing protein 11	CAR11_MOUSE	Card11	12835	12131	11763	9087	10653	10984		12243	10241.3			mito protein domain				34	33	32	32	33	35
	Q9D1I2	Caspase recruitment domain-containing protein 19	CAR19_MOUSE	Card19	2157	1476	1439	1028	1352	1226		1690.67	1202		mito-interacting	mito protein domain, induction, MS/MS				3	2	2	2	2	3
	E9PWH2	Caspase recruitment domain family, member 6	E9PWH2_MOUSE	Card6	24	17	32	30	49	48		24.3333	42.3333			mito protein domain, induction				2	2	3	3	3	2
	Q9CR86	Calcium-regulated heat stable protein 1	CHSP1_MOUSE	Carhsp1	20268	17951	13931	10774	11660	12525		17383.3	11653			induction				3	3	3	3	3	3
	Q9WVG6;Q9WVG6-2	Histone-arginine methyltransferase CARM1;Isoform 2 of Histone-arginine methyltransferase CARM1	CARM1_MOUSE	Carm1	20837	21596	21044	20845	20241	19735		21159	20273.7			mito protein domain+, coexpression				18	18	14	16	15	18
	Q3V3V9	Capping protein, Arp2/3 and myosin-I linker protein 2	CARL2_MOUSE	Carmil2	6773	5658	4730	4839	4650	4852		5720.33	4780.33							21	21	20	20	20	21
	Q80UY1	Carnosine N-methyltransferase	CARME_MOUSE	Carnmt1	13052	13214	12885	10289	10283	12141		13050.3	10904.3							8	8	7	8	8	8
	Q9ER72;Q9ER72-2	Cysteine--tRNA ligase, cytoplasmic;Isoform 2 of Cysteine--tRNA ligase, cytoplasmic	SYCC_MOUSE	Cars1	58959	60830	65015	34734	50053	49727		61601.3	44838			Rickettsial homolog, mito protein domain				37	37	36	35	37	38
	Q8BYM8	Probable cysteine--tRNA ligase, mitochondrial	SYCM_MOUSE	Cars2	2028	1961	767	1315	1298	1373		1585.33	1328.67		MitoCarta3.0	APEX_matrix, targetP signal+, Rickettsial homolog, mito protein domain, coexpression++, MS/MS	Matrix	Mitochondrial central dogma > Translation > mt-tRNA synthetases		5	5	3	4	4	4
	Q8K3W3	Protein CASC3	CASC3_MOUSE	Casc3	1189	1147	1476	1398	1305	1125		1270.67	1276							6	6	6	6	6	6
	P29452	Caspase-1	CASP1_MOUSE	Casp1	12484	11948	10732	9242	10369	9868		11721.3	9826.33			mito protein domain				11	12	11	12	11	11
	P29594	Caspase-2	CASP2_MOUSE	Casp2	6813	5988	6605	6208	6309	6692		6468.67	6403			targetP signal+, mito protein domain				14	14	14	15	15	14
	P70677	Caspase-3	CASP3_MOUSE	Casp3	551974	344581	419667	275700	315901	312881		438741	301494		MitoCarta3.0	literature,mito protein domain	IMS	Protein import, sorting and homeostasis > Protein homeostasis > Proteases | Mitochondrial dynamics and surveillance > Apoptosis		21	20	17	17	20	20
	O08738	Caspase-6	CASP6_MOUSE	Casp6	3313	2441	2673	2318	2488	2267		2809	2357.67			mito protein domain, induction				3	4	3	3	3	3
	P97864	Caspase-7	CASP7_MOUSE	Casp7	10478	9092	7473	6839	7451	6490		9014.33	6926.67			mito protein domain				4	4	4	4	4	4
	O89110	Caspase-8	CASP8_MOUSE	Casp8	138465	128259	131083	99050	111841	104717		132602	105203		MitoCarta3.0	literature, mito protein domain	MOM	Protein import, sorting and homeostasis > Protein homeostasis | Mitochondrial dynamics and surveillance > Apoptosis		37	36	33	33	36	37
	Q9WUF3	CASP8-associated protein 2	C8AP2_MOUSE	Casp8ap2	616	653	644	416	549	564		637.667	509.667							3	3	3	3	3	3
	Q8C3Q9	Caspase-9	CASP9_MOUSE	Casp9	3328	2016	2007	1625	1865	2361		2450.33	1950.33		MitoCarta3.0	literature,mito protein domain	IMS	Protein import, sorting and homeostasis > Protein homeostasis > Proteases | Mitochondrial dynamics and surveillance > Apoptosis		4	4	4	4	4	4
	P51125;P51125-2;P51125-3	Calpastatin;Isoform 2 of Calpastatin;Isoform 3 of Calpastatin	ICAL_MOUSE	Cast	40620	41625	41446	29185	35259	34334		41230.3	32926							33	34	29	29	31	31
	P24270	Catalase	CATA_MOUSE	Cat	93313	103173	108008	88083	96602	93159		101498	92614.7		MitoCarta3.0	yeast mito homolog++, mito protein domain, coexpression	IMS	Metabolism > Detoxification > ROS and glutathione metabolism		28	27	26	26	28	28
	Q08024	Core-binding factor subunit beta	PEBB_MOUSE	Cbfb	166739	174344	183898	159945	164574	158571		174994	161030							11	12	11	11	11	12
	Q08024-2	Isoform 2 of Core-binding factor subunit beta	PEBB_MOUSE	Cbfb	42964	40919	40546	33097	37880	36443		41476.3	35806.7							3	3	2	2	2	2
	P22682	E3 ubiquitin-protein ligase CBL	CBL_MOUSE	Cbl	35730	36451	37584	30454	34121	34184		36588.3	32919.7			mito protein domain				32	30	30	31	30	31
	Q3TTA7	E3 ubiquitin-protein ligase CBL-B	CBLB_MOUSE	Cblb	30000	30843	31113	18987	23555	23654		30652	22065.3			mito protein domain				27	28	28	28	27	27
	Q9JIY2	E3 ubiquitin-protein ligase Hakai	HAKAI_MOUSE	Cbll1	3072	3309	4306	3618	3830	3805		3562.33	3751			coexpression				5	5	5	5	6	6
	P48758	Carbonyl reductase [NADPH] 1	CBR1_MOUSE	Cbr1	73212	70205	66218	43204	59074	58799		69878.3	53692.3			yeast mito homolog, Rickettsial homolog, mito protein domain				18	18	17	17	18	18
	Q91VT4	Carbonyl reductase family member 4	CBR4_MOUSE	Cbr4	9279	9323	8982	7977	9212	8977		9194.67	8722		MitoCarta3.0	literature, APEX_matrix, Rickettsial homolog, mito protein domain, induction, coexpression+, MS/MS++	Matrix	Metabolism > Lipid metabolism > Type II fatty acid synthesis		6	7	6	7	6	6
	Q8VEH6	COBW domain-containing protein 1	CBWD1_MOUSE	Cbwd1	30521	25205	24023	19830	27286	26400		26583	24505.3			coexpression				13	13	13	13	13	13
	P83917	Chromobox protein homolog 1	CBX1_MOUSE	Cbx1	43596	57234	46049	48809	41223	42272		48959.7	44101.3							7	9	6	8	6	7
	P23198	Chromobox protein homolog 3	CBX3_MOUSE	Cbx3	790817	780806	767545	810290	783640	775360		779723	789763							11	12	10	10	10	10
	O55187	E3 SUMO-protein ligase CBX4	CBX4_MOUSE	Cbx4	6199	5948	6104	5634	5753	5428		6083.67	5605			yeast mito homolog, coexpression, MS/MS				8	9	8	9	9	9
	Q61686	Chromobox protein homolog 5	CBX5_MOUSE	Cbx5	155523	156024	180614	169998	170537	162443		164054	167659							14	14	12	13	13	15
	Q9QXV1	Chromobox protein homolog 8	CBX8_MOUSE	Cbx8	1423	2334	1873	1649	1646	2302		1876.67	1865.67			yeast mito homolog				3	4	4	4	3	4
	Q8K1A6	Coiled-coil and C2 domain-containing protein 1A	C2D1A_MOUSE	Cc2d1a	7076	6844	6984	4244	5990	6108		6968	5447.33							9	9	9	8	9	9
	Q8BRN9	Coiled-coil and C2 domain-containing protein 1B	C2D1B_MOUSE	Cc2d1b	19899	19504	19763	18412	18947	18185		19722	18514.7							22	24	23	22	23	24
	Q8CH18	Cell division cycle and apoptosis regulator protein 1	CCAR1_MOUSE	Ccar1	25385	25441	26295	21765	23913	23709		25707	23129			mito protein domain				37	37	37	35	35	37
	Q8VDP4	Cell cycle and apoptosis regulator protein 2	CCAR2_MOUSE	Ccar2	49195	47618	49323	40072	45665	46003		48712	43913.3			targetP signal				33	33	32	32	33	33
	Q3TMW1	Coiled-coil domain-containing protein 102A	C102A_MOUSE	Ccdc102a	822	1152	1057	779	930	793		1010.33	834							1	2	2	2	2	2
	Q8VE99	Coiled-coil domain-containing protein 115	CC115_MOUSE	Ccdc115	58522	41235	40696	29508	35548	37048		46817.7	34034.7							8	9	7	7	9	9
	Q8R344	Coiled-coil domain-containing protein 12	CCD12_MOUSE	Ccdc12	32244	33407	31375	30893	30441	32210		32342	31181.3							9	9	7	8	7	8
	Q9D8X2	Coiled-coil domain-containing protein 124	CC124_MOUSE	Ccdc124	59954	56936	59005	43977	52236	51851		58631.7	49354.7			coexpression				10	10	10	10	10	10
	Q3TC33	Coiled-coil domain-containing protein 127	CC127_MOUSE	Ccdc127	0	793	1343	1012	664	645		712	773.667		MitoCarta3.0	APEX_IMS, MS/MS	Membrane			Filtered	2	3	3	2	3
	Q8C7V8;Q8C7V8-2	Coiled-coil domain-containing protein 134;Isoform 2 of Coiled-coil domain-containing protein 134	CC134_MOUSE	Ccdc134	24288	9573	26278	19345	21396	8012		20046.3	16251							4	4	4	4	4	4
	Q8R0K4	Coiled-coil domain-containing protein 137	CC137_MOUSE	Ccdc137	2816	2076	2929	2877	2859	2400		2607	2712			targetP signal				4	3	4	4	4	4
	Q9D162;Q9D162-2;Q9D162-3	Coiled-coil domain-containing protein 167;Isoform 2 of Coiled-coil domain-containing protein 167;Isoform 3 of Coiled-coil domain-containing protein 167	CC167_MOUSE	Ccdc167	14229	12643	14468	10475	12430	11767		13780	11557.3							2	2	2	2	2	2
	Q3U155	Coiled-coil domain-containing protein 174	CC174_MOUSE	Ccdc174	839	843	933	847	842	711		871.667	800							2	2	2	2	2	2
	Q9JIG7	Coiled-coil domain-containing protein 22	CCD22_MOUSE	Ccdc22	8762	7951	7656	6631	7916	6813		8123	7120							13	13	14	14	14	14
	Q78PG9	Coiled-coil domain-containing protein 25	CCD25_MOUSE	Ccdc25	32381	30625	31205	21747	27617	24941		31403.7	24768.3							9	9	9	8	9	9
	Q9CR29	Coiled-coil domain-containing protein 43	CCD43_MOUSE	Ccdc43	7166	3540	4127	2853	2455	4475		4944.33	3261							4	4	4	4	4	4
	Q9D024	Coiled-coil domain-containing protein 47	CCD47_MOUSE	Ccdc47	31813	33545	34959	25818	29212	27936		33439	27655.3							21	20	20	18	19	19
	Q810U5;Q810U5-3	Coiled-coil domain-containing protein 50;Isoform 3 of Coiled-coil domain-containing protein 50	CCD50_MOUSE	Ccdc50	7604	7237	8729	7189	7723	7821		7856.67	7577.67							7	7	7	7	7	7
	Q3URS9;Q3URS9-2	Mitochondrial potassium channel;Isoform 2 of Mitochondrial potassium channel	MITOK_MOUSE	Ccdc51	4913	4891	5019	3886	4213	3808		4941	3969		MitoCarta3.0	APEX_matrix, targetP signal, MS/MS++	MIM	Small molecule transport		9	9	9	9	9	9
	Q8R3Q6	Coiled-coil domain-containing protein 58	CCD58_MOUSE	Ccdc58	40069	39580	47558	37515	41047	39019		42402.3	39193.7		MitoCarta3.0	APEX_IMS, yeast mito homolog++, mito protein domain+, MS/MS++	IMS			8	8	8	8	8	8
	D3YZP9	Coiled-coil domain-containing protein 6	CCDC6_MOUSE	Ccdc6	14007	14159	13556	11720	11518	11280		13907.3	11506							14	14	13	13	13	13
	Q3UJV1	Coiled-coil domain-containing protein 61	CCD61_MOUSE	Ccdc61	465	482	463	438	448	424		470	436.667							2	2	2	2	2	2
	Q3TCJ8	Coiled-coil domain-containing protein 69	CCD69_MOUSE	Ccdc69	3866	2496	3060	2933	2963	2867		3140.67	2921							5	5	5	5	5	5
	E9Q6B2	Coiled-coil domain-containing protein 85C	CC85C_MOUSE	Ccdc85c	407	419	462	466	471	442		429.333	459.667							2	2	2	2	2	2
	Q9JJ89	Coiled-coil domain-containing protein 86	CCD86_MOUSE	Ccdc86	9946	9123	11477	7979	9220	8307		10182	8502							8	7	8	7	8	8
	Q4QRL3	Coiled-coil domain-containing protein 88B	CC88B_MOUSE	Ccdc88b	41283	40105	40849	30520	36138	35453		40745.7	34037							62	61	60	59	61	62
	Q6VGS5;Q6VGS5-2	Protein Daple;Isoform 2 of Protein Daple	DAPLE_MOUSE	Ccdc88c	1521	1303	1252	881	1136	1134		1358.67	1050.33							16	15	17	16	16	16
	Q8VC31	Coiled-coil domain-containing protein 9	CCDC9_MOUSE	Ccdc9	8356	8605	9762	8441	9138	8506		8907.67	8695							9	9	8	8	8	8
	Q8VDN4	Coiled-coil domain-containing protein 92	CCD92_MOUSE	Ccdc92	2045	1132	1898	1695	4887	134		1691.67	2238.67							2	1	1	2	2	1
	Q7TQK5	Coiled-coil domain-containing protein 93	CCD93_MOUSE	Ccdc93	6186	5962	6305	5452	5792	5613		6151	5619							13	13	12	13	13	13
	Q9DBT3	Coiled-coil domain-containing protein 97	CCD97_MOUSE	Ccdc97	10470	8305	7035	5199	6630	7470		8603.33	6433							5	5	5	5	5	5
	P10146	C-C motif chemokine 1	CCL1_MOUSE	Ccl1	7516	7761	13046	9492	10811	5689		9441	8664							2	2	2	3	2	1
	P14097	C-C motif chemokine 4	CCL4_MOUSE	Ccl4	6106	13543	9567	7334	4079	4085		9738.67	5166							3	4	2	2	2	2
	Q8K2Y9;Q8K2Y9-2	Cerebral cavernous malformations protein 2 homolog;Isoform 2 of Cerebral cavernous malformations protein 2 homolog	CCM2_MOUSE	Ccm2	9740	9183	9460	12198	9705	9826		9461	10576.3							15	16	14	16	16	16
	P51943	Cyclin-A2	CCNA2_MOUSE	Ccna2	27189	22762	24091	21197	22255	22900		24680.7	22117.3							10	9	8	9	9	9
	P24860	G2/mitotic-specific cyclin-B1	CCNB1_MOUSE	Ccnb1	24424	25164	26303	21102	23720	23241		25297	22687.7							13	13	13	13	13	13
	P30276	G2/mitotic-specific cyclin-B2	CCNB2_MOUSE	Ccnb2	8915	7383	8268	7311	7455	6783		8188.67	7183							13	13	12	13	12	12
	Q62447	Cyclin-C	CCNC_MOUSE	Ccnc	6599	4683	4390	3541	3209	2903		5224	3217.67							4	4	4	4	4	4
	P30280	G1/S-specific cyclin-D2	CCND2_MOUSE	Ccnd2	4049	2960	3063	1776	2444	2229		3357.33	2149.67							6	6	6	6	6	6
	P30282	G1/S-specific cyclin-D3	CCND3_MOUSE	Ccnd3	10250	36444	11669	5981	13047	7607		19454.3	8878.33			coexpression				6	6	6	6	6	6
	Q3TVC7;Q3TVC7-3	Cyclin-D1-binding protein 1;Isoform 3 of Cyclin-D1-binding protein 1	CCDB1_MOUSE	Ccndbp1	761	970	604	1096	675	579		778.333	783.333			coexpression				2	2	2	2	2	1
	Q61457	G1/S-specific cyclin-E1	CCNE1_MOUSE	Ccne1	2094	2148	2098	904	1968	1846		2113.33	1572.67							2	2	2	1	2	2
	Q61458	Cyclin-H	CCNH_MOUSE	Ccnh	22165	14916	13380	10837	11145	10221		16820.3	10734.3			yeast mito homolog, coexpression				11	11	11	11	10	10
	O88874	Cyclin-K	CCNK_MOUSE	Ccnk	10737	8300	9205	9723	10567	9570		9414	9953.33							11	10	10	11	11	11
	Q52KE7;Q52KE7-2	Cyclin-L1;Isoform 2 of Cyclin-L1	CCNL1_MOUSE	Ccnl1	2106	1994	1910	2543	1853	1566		2003.33	1987.33			targetP signal				4	4	4	4	4	4
	Q9JJA7	Cyclin-L2	CCNL2_MOUSE	Ccnl2	8110	8154	6572	5590	6448	6211		7612	6083							7	7	7	7	7	7
	Q9QWV9	Cyclin-T1	CCNT1_MOUSE	Ccnt1	6598	7185	6945	5457	6443	6328		6909.33	6076							15	15	16	16	16	16
	Q7TQK0	Cyclin-T2	CCNT2_MOUSE	Ccnt2	130	0	292	226	242	223		140.667	230.333			targetP signal				2	Filtered	2	2	2	2
	Q8BGU5	Cyclin-Y	CCNY_MOUSE	Ccny	3484	3326	3514	2254	2748	2852		3441.33	2618			targetP signal				5	5	5	5	5	5
	P51682	C-C chemokine receptor type 5	CCR5_MOUSE	Ccr5	17616	16917	11434	7599	9351	10173		15322.3	9041							4	4	4	4	4	4
	Q9WU84	Copper chaperone for superoxide dismutase	CCS_MOUSE	Ccs	22508	23823	24750	20486	21721	21588		23693.7	21265			yeast mito homolog, mito protein domain, coexpression				7	7	7	7	7	7
	P80314	T-complex protein 1 subunit beta	TCPB_MOUSE	Cct2	1158757	1167700	1138248	858453	1084298	953070		1.1549e+06	965274			Rickettsial homolog, mito protein domain, coexpression				46	48	41	41	43	46
	P80318	T-complex protein 1 subunit gamma	TCPG_MOUSE	Cct3	1052542	1032780	1118121	819632	962570	902338		1.06781e+06	894847			targetP signal, Rickettsial homolog, mito protein domain				47	46	45	45	45	47
	P80315	T-complex protein 1 subunit delta	TCPD_MOUSE	Cct4	1094694	1006568	1059682	806441	943655	894283		1053648	881460			Rickettsial homolog, mito protein domain				38	40	38	36	38	38
	P80316	T-complex protein 1 subunit epsilon	TCPE_MOUSE	Cct5	663128	673517	667013	507189	603623	558503		667886	556438			Rickettsial homolog, mito protein domain				43	44	37	37	41	43
	P80317	T-complex protein 1 subunit zeta	TCPZ_MOUSE	Cct6a	641565	606626	664611	521222	574843	560375		637601	552147			Rickettsial homolog, mito protein domain				33	33	29	29	29	31
	P80313	T-complex protein 1 subunit eta	TCPH_MOUSE	Cct7	734144	722478	727629	540524	642226	601694		728084	594815			GFP, Rickettsial homolog, mito protein domain				42	43	38	39	40	41
	P42932	T-complex protein 1 subunit theta	TCPQ_MOUSE	Cct8	961739	939657	1025093	770701	885013	838711		975496	831475			Rickettsial homolog, mito protein domain				44	46	40	40	40	42
	Q8C1Y8	Vacuolar fusion protein CCZ1 homolog	CCZ1_MOUSE	Ccz1	10019	9665	9986	14237	8995	19335		9890	14189							12	13	12	13	13	13
	O88875	CD160 antigen	BY55_MOUSE	Cd160	7402	6720	6228	5535	5256	5620		6783.33	5470.33							5	5	5	5	5	5
	P08920	T-cell surface antigen CD2	CD2_MOUSE	Cd2	68881	71262	76188	75731	69990	67546		72110.3	71089							10	10	10	10	10	10
	Q8K4F0	CD226 antigen	CD226_MOUSE	Cd226	24809	27895	22903	17068	21368	23533		25202.3	20656.3							6	6	6	6	6	6
	Q07763	Natural killer cell receptor 2B4	CD244_MOUSE	Cd244	16330	15300	13979	6761	8776	9526		15203	8354.33							8	8	8	8	8	8
	P24161	T-cell surface glycoprotein CD3 zeta chain	CD3Z_MOUSE	Cd247	160497	156903	165492	116064	138035	139276		160964	131125							10	12	12	10	12	12
	P41272	CD27 antigen	CD27_MOUSE	Cd27	8122	6360	8035	40682	13845	7433		7505.67	20653.3							8	8	8	8	8	8
	P31041	T-cell-specific surface glycoprotein CD28	CD28_MOUSE	Cd28	28071	22998	21427	17863	19271	24134		24165.3	20422.7							6	6	7	6	7	6
	Q9JLQ0	CD2-associated protein	CD2AP_MOUSE	Cd2ap	7877	6644	7810	6857	7261	6750		7443.67	6956			mito protein domain				17	17	17	17	17	17
	Q9CWK3	CD2 antigen cytoplasmic tail-binding protein 2	CD2B2_MOUSE	Cd2bp2	38879	40507	48465	38790	43650	42839		42617	41759.7			mito protein domain				8	8	8	9	8	9
	Q61470	Leukocyte antigen CD37	CD37_MOUSE	Cd37	7231	6758	8994	6154	6540	6397		7661	6363.67							3	4	4	4	4	4
	P04235	T-cell surface glycoprotein CD3 delta chain	CD3D_MOUSE	Cd3d	67722	56142	68009	56255	62347	55728		63957.7	58110							4	4	4	4	4	4
	P22646	T-cell surface glycoprotein CD3 epsilon chain	CD3E_MOUSE	Cd3e	136030	140842	145679	109788	126821	125359		140850	120656							9	9	9	9	9	9
	P11942	T-cell surface glycoprotein CD3 gamma chain	CD3G_MOUSE	Cd3g	124815	125659	137131	102021	115345	108608		129202	108658							9	8	8	8	9	9
	P15379;P15379-10;P15379-11;P15379-2;P15379-3;P15379-4;P15379-5;P15379-6;P15379-7;P15379-8;P15379-9	CD44 antigen;Isoform 8 of CD44 antigen;Isoform 9 of CD44 antigen;Isoform 13 of CD44 antigen;Isoform 12 of CD44 antigen;Isoform 4 of CD44 antigen;Isoform 6 of CD44 antigen;Isoform 7 of CD44 antigen;Isoform 2 of CD44 antigen;Isoform 3 of CD44 antigen;Isoform 5 of CD44 antigen	CD44_MOUSE	Cd44	17447	15459	19694	11990	17154	17193		17533.3	15445.7							7	7	7	7	7	7
	Q61735	Leukocyte surface antigen CD47	CD47_MOUSE	Cd47	287665	191125	186369	124958	149603	148561		221720	141041							5	5	5	5	5	5
	Q61735-2	Isoform 2 of Leukocyte surface antigen CD47	CD47_MOUSE	Cd47	10951	12157	14148	9581	11585	10693		12418.7	10619.7							3	3	3	3	3	3
	P18181	CD48 antigen	CD48_MOUSE	Cd48	193253	180271	216757	192798	191803	181787		196760	188796							9	10	9	10	10	9
	P13379	T-cell surface glycoprotein CD5	CD5_MOUSE	Cd5	9549	4810	3582	6933	6509	3597		5980.33	5679.67							10	11	10	12	9	10
	Q61003;Q61003-2	T-cell differentiation antigen CD6;Isoform 2 of T-cell differentiation antigen CD6	CD6_MOUSE	Cd6	1286	434	1458	1397	1495	664		1059.33	1185.33							7	4	8	9	9	6
	P37217	Early activation antigen CD69	CD69_MOUSE	Cd69	41526	42738	42888	19584	31634	30489		42384	27235.7							11	12	10	11	12	12
	P40237	CD82 antigen	CD82_MOUSE	Cd82	19294	19581	23441	18629	22321	19771		20772	20240.3							6	6	5	5	6	6
	Q18PI6;Q18PI6-3	SLAM family member 5;Isoform 3 of SLAM family member 5	SLAF5_MOUSE	Cd84	4502	4372	5184	3669	4532	3926		4686	4042.33							5	5	5	5	5	4
	P01731	T-cell surface glycoprotein CD8 alpha chain	CD8A_MOUSE	Cd8a	56288	58302	51649	42920	46422	49911		55413	46417.7							5	5	5	5	5	6
	P10300	T-cell surface glycoprotein CD8 beta chain	CD8B_MOUSE	Cd8b	172456	182025	166141	158466	154828	156922		173541	156739							11	11	11	11	11	11
	Q3U0X8	T-cell surface protein tactile	TACT_MOUSE	Cd96	3252	3171	2979	2293	2643	2706		3134	2547.33							4	4	4	4	4	4
	Q8CC12;Q8CC12-2	Codanin-1;Isoform 2 of Codanin-1	CDAN1_MOUSE	Cdan1	2697	2895	2399	2316	2448	2382		2663.67	2382							19	18	19	19	19	19
	Q8CII2	Cell division cycle protein 123 homolog	CD123_MOUSE	Cdc123	35494	32447	32657	23657	27448	26424		33532.7	25843			coexpression				11	11	11	11	11	11
	Q8R349	Cell division cycle protein 16 homolog	CDC16_MOUSE	Cdc16	18749	17266	17707	14585	15824	14528		17907.3	14979			mito protein domain				17	17	17	17	17	17
	Q9JJ66	Cell division cycle protein 20 homolog	CDC20_MOUSE	Cdc20	6716	6810	6998	6715	6810	6752		6841.33	6759			mito protein domain				11	11	10	11	10	11
	Q8BGZ4	Cell division cycle protein 23 homolog	CDC23_MOUSE	Cdc23	26944	23459	23734	19482	21647	20585		24712.3	20571.3			mito protein domain				23	23	23	23	23	24
	Q99JP4	Anaphase-promoting complex subunit CDC26	CDC26_MOUSE	Cdc26	4461	4052	4423	3478	4587	2904		4312	3656.33							3	3	3	2	3	3
	A2A6Q5;A2A6Q5-3	Cell division cycle protein 27 homolog;Isoform 3 of Cell division cycle protein 27 homolog	CDC27_MOUSE	Cdc27	10132	7142	6614	5313	6080	6679		7962.67	6024			mito protein domain				15	15	15	14	15	15
	Q8CFI2	Ubiquitin-conjugating enzyme E2 R1	UB2R1_MOUSE	Cdc34	51498	49108	55586	37277	45058	40755		52064	41030			coexpression				8	8	8	7	8	8
	Q61081	Hsp90 co-chaperone Cdc37	CDC37_MOUSE	Cdc37	210904	222457	257376	212968	234871	220283		230246	222707							19	19	14	18	19	19
	Q9CZP7;Q9CZP7-2;Q9CZP7-3;Q9CZP7-4	Hsp90 co-chaperone Cdc37-like 1;Isoform 2 of Hsp90 co-chaperone Cdc37-like 1;Isoform 3 of Hsp90 co-chaperone Cdc37-like 1;Isoform 4 of Hsp90 co-chaperone Cdc37-like 1	CD37L_MOUSE	Cdc37l1	930	1282	716	525	761	878		976	721.333			induction, coexpression				2	2	2	2	2	2
	Q9DC48	Pre-mRNA-processing factor 17	PRP17_MOUSE	Cdc40	29140	27696	33478	31418	31155	27605		30104.7	30059.3			mito protein domain				25	25	28	28	27	26
	P60766	Cell division control protein 42 homolog	CDC42_MOUSE	Cdc42	1235375	1181145	1050662	850172	972039	936399		1.15573e+06	919537			mito protein domain				9	11	9	9	10	11
	Q8BGH7	CDC42 small effector protein 2	C42S2_MOUSE	Cdc42se2	27512	27359	24224	17096	25199	24306		26365	22200.3			mito protein domain				2	2	2	2	2	2
	Q9Z1X9	Cell division control protein 45 homolog	CDC45_MOUSE	Cdc45	15495	11593	13449	9741	12383	11903		13512.3	11342.3							13	12	13	13	13	13
	Q6A068	Cell division cycle 5-like protein	CDC5L_MOUSE	Cdc5l	80379	70679	78393	69068	72408	71185		76483.7	70887							38	39	36	35	36	38
	Q8JZM7	Parafibromin	CDC73_MOUSE	Cdc73	86366	73213	100133	84227	86848	70849		86570.7	80641.3							29	29	28	28	30	28
	Q14B71	Cell division cycle-associated protein 2	CDCA2_MOUSE	Cdca2	3424	3414	4063	4311	4260	3995		3633.67	4188.67							19	19	18	18	18	19
	Q99M54	Cell division cycle-associated protein 3	CDCA3_MOUSE	Cdca3	5940	5818	5658	3422	7256	5634		5805.33	5437.33			targetP signal				2	2	2	2	2	2
	Q9CPY3	Sororin	CDCA5_MOUSE	Cdca5	10233	4552	7966	10360	10066	8341		7583.67	9589							5	4	5	5	5	5
	Q9D0M2	Cell division cycle-associated protein 7	CDCA7_MOUSE	Cdca7	1773	2287	2204	2242	2287	15100		2088	6543							4	4	4	4	4	4
	Q922M5	Cell division cycle-associated 7-like protein	CDA7L_MOUSE	Cdca7l	7324	7418	8624	10704	8983	7577		7788.67	9088							14	14	14	14	14	13
	Q8BHX3	Borealin	BOREA_MOUSE	Cdca8	96059	109587	100809	107539	117792	104343		102152	109891			targetP signal				12	13	12	12	12	12
	P09803	Cadherin-1	CADH1_MOUSE	Cdh1	11023	4356	2742	3341	4044	2486		6040.33	3290.33							4	5	4	3	5	5
	Q8VDP6	CDP-diacylglycerol--inositol 3-phosphatidyltransferase	CDIPT_MOUSE	Cdipt	75827	70818	67330	49258	64694	60526		71325	58159.3			yeast mito homolog, Rickettsial homolog, mito protein domain				5	5	5	5	5	5
	P11440	Cyclin-dependent kinase 1	CDK1_MOUSE	Cdk1	477139	473694	511323	436494	464510	457863		487385	452956			mito protein domain				21	20	19	19	19	20
	P24788	Cyclin-dependent kinase 11B	CD11B_MOUSE	Cdk11b	31292	33431	35615	28286	32359	31316		33446	30653.7			mito protein domain				22	22	22	22	23	23
	Q14AX6;Q14AX6-3	Cyclin-dependent kinase 12;Isoform 3 of Cyclin-dependent kinase 12	CDK12_MOUSE	Cdk12	1282	870	3152	795	1399	1042		1768	1078.67			mito protein domain				11	9	11	9	10	9
	Q69ZA1	Cyclin-dependent kinase 13	CDK13_MOUSE	Cdk13	2725	2521	2091	1804	2295	2353		2445.67	2150.67			mito protein domain				15	14	14	15	14	15
	Q8K0D0	Cyclin-dependent kinase 17	CDK17_MOUSE	Cdk17	9047	7867	7534	6391	7852	6830		8149.33	7024.33			mito protein domain				13	14	15	14	14	14
	Q8BWD8	Cyclin-dependent kinase 19	CDK19_MOUSE	Cdk19	3285	9724	3398	2762	3534	3321		5469	3205.67			mito protein domain				7	5	7	6	7	7
	P97377;P97377-2	Cyclin-dependent kinase 2;Isoform CDK2-alpha of Cyclin-dependent kinase 2	CDK2_MOUSE	Cdk2	97944	90566	96728	81824	89382	92171		95079.3	87792.3			mito protein domain				16	18	17	17	17	16
	O35207	Cyclin-dependent kinase 2-associated protein 1	CDKA1_MOUSE	Cdk2ap1	17483	8307	9552	9928	8017	6861		11780.7	8268.67							4	4	4	4	4	4
	P30285	Cyclin-dependent kinase 4	CDK4_MOUSE	Cdk4	62352	59619	61257	51426	61854	59518		61076	57599.3			mito protein domain				14	13	14	14	13	13
	P49615	Cyclin-dependent-like kinase 5	CDK5_MOUSE	Cdk5	12397	10190	10094	9997	10213	9569		10893.7	9926.33			mito protein domain				7	8	7	8	8	8
	Q8BTW8	Mitochondrial tRNA methylthiotransferase CDK5RAP1	CK5P1_MOUSE	Cdk5rap1	1700	1360	1322	1127	1171	1066		1460.67	1121.33		MitoCarta3.0	literature,targetP signal, Rickettsial homolog, mito protein domain	Matrix	Mitochondrial central dogma > mtRNA metabolism > mt-tRNA modifications		2	2	2	2	2	2
	Q8K389	CDK5 regulatory subunit-associated protein 2	CK5P2_MOUSE	Cdk5rap2	1349	154	94	68	83	1106		532.333	419							2	2	2	2	2	2
	Q99LM2	CDK5 regulatory subunit-associated protein 3	CK5P3_MOUSE	Cdk5rap3	21726	18422	18361	13615	15739	14113		19503	14489							18	17	17	17	17	18
	Q64261	Cyclin-dependent kinase 6	CDK6_MOUSE	Cdk6	183309	170107	191222	193519	190132	179935		181546	187862			mito protein domain				19	18	18	18	18	18
	Q03147	Cyclin-dependent kinase 7	CDK7_MOUSE	Cdk7	30221	26055	26466	22278	24750	24491		27580.7	23839.7			mito protein domain				12	12	12	12	12	12
	Q99J95	Cyclin-dependent kinase 9	CDK9_MOUSE	Cdk9	31519	29714	28780	21982	24974	24937		30004.3	23964.3			mito protein domain				12	12	13	12	12	12
	Q91WE6;Q91WE6-2	Threonylcarbamoyladenosine tRNA methylthiotransferase;Isoform 2 of Threonylcarbamoyladenosine tRNA methylthiotransferase	CDKAL_MOUSE	Cdkal1	4462	4205	3239	2295	2987	2884		3968.67	2722			Rickettsial homolog, mito protein domain				6	6	6	6	6	6
	P39689	Cyclin-dependent kinase inhibitor 1	CDN1A_MOUSE	Cdkn1a	13721	14194	15049	5500	11904	10509		14321.3	9304.33							4	4	4	4	4	4
	P46414	Cyclin-dependent kinase inhibitor 1B	CDN1B_MOUSE	Cdkn1b	3650	6182	3268	3918	6060	5929		4366.67	5302.33							4	5	4	4	5	5
	Q64364	Tumor suppressor ARF	ARF_MOUSE	Cdkn2a	9087	8039	3735	2337	3202	3815		6953.67	3118			targetP signal, mito protein domain				4	5	5	5	5	5
	Q8BI72	CDKN2A-interacting protein	CARF_MOUSE	Cdkn2aip	10972	12219	12652	12023	12204	11823		11947.7	12016.7							21	23	23	23	22	22
	P55271	Cyclin-dependent kinase 4 inhibitor B	CDN2B_MOUSE	Cdkn2b	1633	1589	622	559	1058	569		1281.33	728.667			mito protein domain				2	2	1	2	2	2
	Q60773	Cyclin-dependent kinase 4 inhibitor D	CDN2D_MOUSE	Cdkn2d	3452	3488	3518	2675	3206	2220		3486	2700.33			Rickettsial homolog, mito protein domain, induction				3	3	3	3	3	3
	Q99L43	Phosphatidate cytidylyltransferase 2	CDS2_MOUSE	Cds2	15718	15353	13440	10157	11685	12107		14837	11316.3			Rickettsial homolog, mito protein domain				7	6	7	8	7	7
	Q4VAA2	Protein CDV3	CDV3_MOUSE	Cdv3	172819	189683	211845	149565	184911	185899		191449	173458							18	18	18	18	18	18
	Q9WTK2-2	Isoform 2 of Chromodomain Y-like protein	CDYL_MOUSE	Cdyl	3104	3190	3787	2391	2711	2043		3360.33	2381.67			mito protein domain				8	8	8	8	8	7
	Q9D5D8	Chromodomain Y-like protein 2	CDYL2_MOUSE	Cdyl2	1233	971	851	722	757	870		1018.33	783			mito protein domain				2	2	2	2	2	2
	P53569	CCAAT/enhancer-binding protein zeta	CEBPZ_MOUSE	Cebpz	23575	18995	19048	15700	17801	17054		20539.3	16851.7			coexpression				31	32	32	32	32	32
	Q8BTE5	Protein CEBPZOS	CEBOS_MOUSE	Cebpzos	5560	4132	4717	4123	4555	4528		4803	4402		MitoCarta3.0	coexpression+, MS/MS+	unknown			2	2	2	2	2	2
	P28659-4	Isoform 4 of CUGBP Elav-like family member 1	CELF1_MOUSE	Celf1	31569	38653	38663	32368	33917	30982		36295	32422.3			mito protein domain, coexpression				12	14	14	13	13	13
	Q9Z0H4-11	Isoform 11 of CUGBP Elav-like family member 2	CELF2_MOUSE	Celf2	108518	117918	119045	100520	110820	103747		115160	105029			mito protein domain				16	16	14	14	14	15
	Q5FWI3	Cell surface hyaluronidase	CEIP2_MOUSE	Cemip2	1507	970	533	385	440	503		1003.33	442.667			induction				5	5	5	5	5	5
	O35216	Histone H3-like centromeric protein A	CENPA_MOUSE	Cenpa	10599	72926	69855	12225	11748	10818		51126.7	11597							2	2	2	2	2	2
	P49452	Centromere protein C	CENPC_MOUSE	Cenpc	3299	4484	3936	4319	4150	3794		3906.33	4087.67			targetP signal				17	15	18	21	19	18
	Q6RT24	Centromere-associated protein E	CENPE_MOUSE	Cenpe	2240	2085	2478	1645	2216	2051		2267.67	1970.67			mito protein domain				14	14	14	14	14	13
	E9Q3P4	Centromere protein F	E9Q3P4_MOUSE	Cenpf	667	654	557	547	548	559		626	551.333			induction, MS/MS				13	14	14	14	14	13
	Q9QYM8	Centromere protein H	CENPH_MOUSE	Cenph	11002	13722	6847	7766	6305	6501		10523.7	6857.33							5	6	6	6	5	5
	Q8K1K4	Centromere protein I	CENPI_MOUSE	Cenpi	493	411	459	437	402	394		454.333	411			targetP signal				4	3	4	4	3	3
	Q9ESN5	Centromere protein K	CENPK_MOUSE	Cenpk	2651	2208	1881	1933	1810	1436		2246.67	1726.33							3	3	3	3	3	3
	Q3U3S3	Centromere protein L	CENPL_MOUSE	Cenpl	318	454	536	563	496	703		436	587.333							3	4	4	4	4	5
	Q9CQA0	Centromere protein M	CENPM_MOUSE	Cenpm	545	1344	1414	1282	1430	972		1101	1228							1	2	3	3	3	3
	Q9CZ92	Centromere protein P	CENPP_MOUSE	Cenpp	1566	1677	934	1779	1913	1850		1392.33	1847.33							3	3	3	3	3	3
	Q9CPQ5	Centromere protein Q	CENPQ_MOUSE	Cenpq	2377	1220	16481	1781	1720	1625		6692.67	1708.67							3	2	2	3	3	3
	Q9D084	Centromere protein S	CENPS_MOUSE	Cenps	1694	2661	2511	2528	2672	2769		2288.67	2656.33							2	2	2	2	2	2
	Q3TJM4	Centromere protein T	CENPT_MOUSE	Cenpt	890	637	697	834	344	744		741.333	640.667							2	2	2	2	2	2
	Q8C4M7	Centromere protein U	CENPU_MOUSE	Cenpu	1919	2113	1673	1800	1680	1621		1901.67	1700.33							4	4	4	4	4	4
	Q9CXS4	Centromere protein V	CENPV_MOUSE	Cenpv	24522	26372	25676	20246	21061	24685		25523.3	21997.3			targetP signal				9	9	9	9	9	9
	Q7TSG1;Q7TSG1-2	Centrosomal protein of 120 kDa;Isoform 2 of Centrosomal protein of 120 kDa	CE120_MOUSE	Cep120	1904	1299	1314	1111	1180	1183		1505.67	1158							3	3	3	3	3	3
	Q8BI22;Q8BI22-2	Centrosomal protein of 128 kDa;Isoform 2 of Centrosomal protein of 128 kDa	CE128_MOUSE	Cep128	141	165	99	5	130	104		135	79.6667							2	2	1	1	2	2
	Q62036	Centrosomal protein of 131 kDa	CP131_MOUSE	Cep131	750	92	805	696	686	468		549	616.667							2	1	2	2	2	2
	A2AUM9	Centrosomal protein of 152 kDa	CE152_MOUSE	Cep152	833	671	665	519	700	621		723	613.333							8	7	8	8	8	8
	Q6A065	Centrosomal protein of 170 kDa	CE170_MOUSE	Cep170	1545	1505	1402	1064	1338	1314		1484	1238.67			targetP signal, mito protein domain				10	11	11	11	11	11
	E9Q4Y4	Centrosomal protein 192	E9Q4Y4_MOUSE	Cep192	4415	1299	1130	890	987	932		2281.33	936.333							15	15	15	14	15	14
	Q60952	Centrosome-associated protein CEP250	CP250_MOUSE	Cep250	4753	3978	3655	2817	3130	3094		4128.67	3013.67							29	30	28	28	30	31
	Q99NF3	Centrosomal protein of 41 kDa	CEP41_MOUSE	Cep41	2414	2595	2771	2032	2257	2113		2593.33	2134			targetP signal, mito protein domain				6	6	6	6	6	6
	Q66JX5;Q66JX5-2	Centrosomal protein 43;Isoform 2 of Centrosomal protein 43	CEP43_MOUSE	Cep43	2604	2170	3136	2560	2768	2030		2636.67	2452.67							4	5	5	4	5	3
	Q8BT07	Centrosomal protein of 55 kDa	CEP55_MOUSE	Cep55	28442	28648	31091	25573	28250	27897		29393.7	27240							19	19	18	18	19	19
	Q8CEE0;Q8CEE0-2	Centrosomal protein of 57 kDa;Isoform 2 of Centrosomal protein of 57 kDa	CEP57_MOUSE	Cep57	3656	3504	3258	3212	3178	2986		3472.67	3125.33							5	5	5	5	5	4
	Q3UPP8;Q3UPP8-3	Centrosomal protein of 63 kDa;Isoform 3 of Centrosomal protein of 63 kDa	CEP63_MOUSE	Cep63	4443	4062	6075	4957	5212	4028		4860	4732.33							2	2	3	3	3	3
	Q0VEJ0	Centrosomal protein of 76 kDa	CEP76_MOUSE	Cep76	791	1055	1304	726	787	819		1050	777.333							3	3	3	3	3	3
	Q8BMK0	Centrosomal protein of 85 kDa	CEP85_MOUSE	Cep85	3529	2822	1356	1702	2185	2292		2569	2059.67							5	5	5	5	5	5
	Q9CZ62	Centrosomal protein of 97 kDa	CEP97_MOUSE	Cep97	2720	3424	3341	3008	3122	2457		3161.67	2862.33			yeast mito homolog, mito protein domain				15	17	15	14	14	13
	Q8BGS7;Q8BGS7-2	Choline/ethanolaminephosphotransferase 1;Isoform 2 of Choline/ethanolaminephosphotransferase 1	CEPT1_MOUSE	Cept1	12640	11489	14583	11439	12263	12379		12904	12027			yeast mito homolog, Rickettsial homolog, mito protein domain				3	3	3	3	3	3
	Q924Z4	Ceramide synthase 2	CERS2_MOUSE	Cers2	21275	28031	25628	16482	19959	19040		24978	18493.7							7	7	6	6	6	7
	Q9D6J1	Ceramide synthase 4	CERS4_MOUSE	Cers4	1349	1255	1344	1085	1207	1212		1316	1168							2	2	2	2	2	2
	Q9D6K9	Ceramide synthase 5	CERS5_MOUSE	Cers5	10084	8665	6975	4768	5501	5630		8574.67	5299.67							9	8	9	8	8	8
	Q9EQG9	Ceramide transfer protein	CERT_MOUSE	Cert1	36709	32807	39087	26030	32724	35714		36201	31489.3			mito protein domain				29	29	29	28	29	29
	Q9R1K9	Centrin-2	CETN2_MOUSE	Cetn2	32045	32741	31600	24837	29631	28332		32128.7	27600			mito protein domain				9	9	8	8	8	8
	O35648	Centrin-3	CETN3_MOUSE	Cetn3	9145	9191	8921	7256	8706	9564		9085.67	8508.67			mito protein domain				3	3	3	3	3	3
	Q8BTU1	Cilia- and flagella-associated protein 20	CFA20_MOUSE	Cfap20	28121	27251	25057	22765	24579	24070		26809.7	23804.7			MS/MS				7	7	8	8	8	8
	Q8C6E0	Cilia- and flagella-associated protein 36	CFA36_MOUSE	Cfap36	6568	5841	5995	4518	5167	4318		6134.67	4667.67			mito protein domain				5	5	5	5	5	5
	O88271	Craniofacial development protein 1	CFDP1_MOUSE	Cfdp1	38882	40516	48959	41234	43181	41605		42785.7	42006.7							12	12	11	11	11	12
	P18760	Cofilin-1	COF1_MOUSE	Cfl1	12222116	11040859	10986619	9411087	10123882	9569610		1.14165e+07	9.70153e+06							29	29	27	27	28	28
	P11680	Properdin	PROP_MOUSE	Cfp	540	813	811	78	459	543		721.333	360							4	5	5	2	5	4
	Q8C6L5	Cyclic GMP-AMP synthase	CGAS_MOUSE	Cgas	6090	6887	5673	5735	6391	6097		6216.67	6074.33			mito protein domain				10	12	12	12	12	12
	Q8BHG9	CGG triplet repeat-binding protein 1	CGBP1_MOUSE	Cggbp1	78815	62975	80377	74407	77179	69300		74055.7	73628.7							11	11	11	11	11	11
	Q9QWF0	Chromatin assembly factor 1 subunit A	CAF1A_MOUSE	Chaf1a	14057	13704	13664	11741	12065	11966		13808.3	11924							19	20	20	20	19	20
	Q9D0N7	Chromatin assembly factor 1 subunit B	CAF1B_MOUSE	Chaf1b	21153	19913	17309	15612	16527	43156		19458.3	25098.3			mito protein domain				16	16	14	15	15	15
	Q8K327	Chromosome alignment-maintaining phosphoprotein 1	CHAP1_MOUSE	Champ1	5248	4517	5221	4795	4891	4727		4995.33	4804.33							14	11	13	13	13	13
	Q9CQA6	Coiled-coil-helix-coiled-coil-helix domain-containing protein 1	CHCH1_MOUSE	Chchd1	7311	8093	8468	7686	8226	8069		7957.33	7993.67		MitoCarta3.0	GFP, targetP signal, yeast mito homolog++, mito protein domain, coexpression+, MS/MS	MIM	Mitochondrial central dogma > Translation > Mitochondrial ribosome		2	2	2	2	2	2
	Q9CRB9	MICOS complex subunit Mic19	MIC19_MOUSE	Chchd3	59803	58485	65277	53145	59006	55091		61188.3	55747.3		MitoCarta3.0	literature, APEX_IMS, APEX_matrix, GFP, Rickettsial homolog, induction, coexpression++, MS/MS++	MIM	Mitochondrial dynamics and surveillance > Cristae formation > MICOS complex | Mitochondrial dynamics and surveillance > Intramitochondrial membrane interactions		14	13	12	10	13	13
	Q8VEA4	Mitochondrial intermembrane space import and assembly protein 40	MIA40_MOUSE	Chchd4	27304	23514	29316	14415	24426	16141		26711.3	18327.3		MitoCarta3.0	literature, APEX_IMS, yeast mito homolog++, mito protein domain, induction, coexpression, MS/MS+	IMS	Protein import, sorting and homeostasis > Protein import and sorting > MIA40		3	3	3	3	3	3
	Q91VN4	MICOS complex subunit Mic25	MIC25_MOUSE	Chchd6	17751	3824	4433	3910	22661	3711		8669.33	10094		MitoCarta3.0	literature, APEX_IMS, APEX_matrix, yeast mito homolog, coexpression, MS/MS++	MIM	Mitochondrial dynamics and surveillance > Cristae formation > MICOS complex		7	7	7	7	7	7
	P40201	Chromodomain-helicase-DNA-binding protein 1	CHD1_MOUSE	Chd1	5693	5434	5197	4467	4872	4764		5441.33	4701			yeast mito homolog, mito protein domain				26	26	24	24	26	25
	Q9CXF7	Chromodomain-helicase-DNA-binding protein 1-like	CHD1L_MOUSE	Chd1l	6929	6216	5467	4653	5190	5234		6204	5025.67			mito protein domain				16	16	15	16	16	16
	E9PZM4	Chromodomain-helicase-DNA-binding protein 2	CHD2_MOUSE	Chd2	2521	1758	1767	1446	1511	1653		2015.33	1536.67			yeast mito homolog, mito protein domain				10	9	10	10	10	10
	B1AR17	Chromodomain helicase DNA-binding protein 3	B1AR17_MOUSE	Chd3	21734	21930	19969	17991	18889	18165		21211	18348.3			yeast mito homolog, mito protein domain				31	28	27	33	29	31
	Q6PDQ2	Chromodomain-helicase-DNA-binding protein 4	CHD4_MOUSE	Chd4	75764	77261	78591	68762	73033	71003		77205.3	70932.7			yeast mito homolog, mito protein domain				85	87	83	83	84	85
	A2AJK6	Chromodomain-helicase-DNA-binding protein 7	CHD7_MOUSE	Chd7	7318	5802	6560	1403	5558	1092		6560	2684.33			yeast mito homolog, mito protein domain				14	15	14	15	15	15
	Q09XV5	Chromodomain-helicase-DNA-binding protein 8	CHD8_MOUSE	Chd8	5658	5609	5931	4723	5521	5099		5732.67	5114.33			yeast mito homolog, mito protein domain				34	35	36	36	36	37
	O35280;O35280-2	Serine/threonine-protein kinase Chk1;Isoform 2 of Serine/threonine-protein kinase Chk1	CHK1_MOUSE	Chek1	5608	5757	6401	6389	6320	6099		5922	6269.33			mito protein domain				10	10	10	10	9	10
	Q8CGZ0	Calcium homeostasis endoplasmic reticulum protein	CHERP_MOUSE	Cherp	58837	47961	57965	42888	41973	42229		54921	42363.3							26	25	25	25	25	24
	Q810L3;Q810L3-2;Q810L3-3;Q810L3-4	E3 ubiquitin-protein ligase CHFR;Isoform 2 of E3 ubiquitin-protein ligase CHFR;Isoform 3 of E3 ubiquitin-protein ligase CHFR;Isoform 4 of E3 ubiquitin-protein ligase CHFR	CHFR_MOUSE	Chfr	1024	854	814	575	701	680		897.333	652			mito protein domain				2	2	2	2	2	2
	Q922Q9	Chitinase domain-containing protein 1	CHID1_MOUSE	Chid1	2268	1873	2909	1723	2090	2350		2350	2054.33							7	6	7	7	6	6
	Q9QXG2	Rab proteins geranylgeranyltransferase component A 1	RAE1_MOUSE	Chm	12163	9086	8509	6319	6888	6752		9919.33	6653							15	16	16	16	16	15
	Q921W0	Charged multivesicular body protein 1a	CHM1A_MOUSE	Chmp1a	23533	28675	31172	23137	27035	26067		27793.3	25413			induction				6	6	6	6	6	6
	Q99LU0	Charged multivesicular body protein 1b-1	CH1B1_MOUSE	Chmp1b1	14745	15958	18105	15884	16217	16355		16269.3	16152							3	3	3	3	3	3
	Q9DB34	Charged multivesicular body protein 2a	CHM2A_MOUSE	Chmp2a	56868	50036	55057	47826	50152	41777		53987	46585							8	8	8	8	8	8
	Q8BJF9	Charged multivesicular body protein 2b	CHM2B_MOUSE	Chmp2b	9380	9275	1028	7301	7613	1579		6561	5497.67							2	2	2	2	2	2
	Q9CQ10	Charged multivesicular body protein 3	CHMP3_MOUSE	Chmp3	19198	19858	20762	15594	18265	16559		19939.3	16806							5	5	5	5	5	5
	Q9D8B3	Charged multivesicular body protein 4b	CHM4B_MOUSE	Chmp4b	136788	138265	153776	114835	128207	130475		142943	124506			induction				12	12	11	11	11	12
	Q9D7S9	Charged multivesicular body protein 5	CHMP5_MOUSE	Chmp5	30190	28641	27975	19827	24292	23141		28935.3	22420							6	6	6	6	5	6
	P0C0A3	Charged multivesicular body protein 6	CHMP6_MOUSE	Chmp6	5639	5611	9818	6110	6382	8346		7022.67	6946			targetP signal				3	3	3	3	3	3
	Q8R1T1	Charged multivesicular body protein 7	CHMP7_MOUSE	Chmp7	8881	6956	7344	4813	6742	5212		7727	5589			induction, coexpression				11	12	10	10	11	12
	Q9D1P4	Cysteine and histidine-rich domain-containing protein 1	CHRD1_MOUSE	Chordc1	169485	169315	193158	141395	164002	158478		177319	154625			coexpression				18	18	17	17	18	18
	P61022	Calcineurin B homologous protein 1	CHP1_MOUSE	Chp1	14077	13632	12719	8571	10388	9825		13476	9594.67			mito protein domain, coexpression, MS/MS				7	8	7	7	8	7
	Q9JKP8	Chromatin accessibility complex protein 1	CHRC1_MOUSE	Chrac1	22621	22453	24884	22250	23299	21617		23319.3	22388.7							5	5	4	5	5	5
	Q99LL3	Carbohydrate sulfotransferase 12	CHSTC_MOUSE	Chst12	63183	49294	305	30994	34947	31046		37594	32329							2	2	1	2	2	2
	Q6ZQ11	Chondroitin sulfate synthase 1	CHSS1_MOUSE	Chsy1	2364	2935	2395	2641	4105	5167		2564.67	3971							5	6	5	6	5	5
	Q8BIW9	Chromosome transmission fidelity protein 18 homolog	CTF18_MOUSE	Chtf18	10479	8971	8721	7673	8556	8100		9390.33	8109.67			yeast mito homolog, mito protein domain				26	23	24	25	26	25
	P0CG15	Chromosome transmission fidelity protein 8 homolog	CTF8_MOUSE	Chtf8	9423	8248	7265	7219	6706	7345		8312	7090							3	3	3	3	3	3
	Q9CY57;Q9CY57-2;Q9CY57-3;Q9CY57-4;Q9CY57-5	Chromatin target of PRMT1 protein;Isoform 2 of Chromatin target of PRMT1 protein;Isoform 3 of Chromatin target of PRMT1 protein;Isoform 4 of Chromatin target of PRMT1 protein;Isoform 5 of Chromatin target of PRMT1 protein	CHTOP_MOUSE	Chtop	38451	45711	53635	45449	48751	47038		45932.3	47079.3			targetP signal				5	5	5	5	5	5
	Q60680	Inhibitor of nuclear factor kappa-B kinase subunit alpha	IKKA_MOUSE	Chuk	7226	5725	5612	3963	4773	4743		6187.67	4493							14	14	14	14	14	14
	Q6DG52	Protein Churchill	CHUR_MOUSE	Churc1	46366	47892	51028	38195	48406	45635		48428.7	44078.7			coexpression+				5	4	5	4	5	5
	Q99KN2	Probable cytosolic iron-sulfur protein assembly protein CIAO1	CIAO1_MOUSE	Ciao1	20879	21583	21188	15517	16447	17452		21216.7	16472			mito protein domain, induction, coexpression				13	13	13	13	13	13
	Q9DCL2	Cytosolic iron-sulfur assembly component 2A	CIA2A_MOUSE	Ciao2a	8956	8573	7773	5957	8125	6925		8434	7002.33			induction				3	3	2	2	3	3
	Q9D187	Cytosolic iron-sulfur assembly component 2B	CIA2B_MOUSE	Ciao2b	9099	8764	8261	6961	8573	4897		8708	6810.33			coexpression				4	4	4	4	4	4
	Q7TMW6;Q7TMW6-2	Cytosolic iron-sulfur assembly component 3;Isoform 2 of Cytosolic iron-sulfur assembly component 3	CIAO3_MOUSE	Ciao3	2698	3737	2528	1898	2405	2687		2987.67	2330			induction, coexpression+				5	7	7	7	7	6
	Q8WTY4	Anamorsin	CPIN1_MOUSE	Ciapin1	58689	52255	50303	41103	46602	43395		53749	43700			yeast mito homolog, mito protein domain				10	10	10	10	10	10
	Q9Z0F4	Calcium and integrin-binding protein 1	CIB1_MOUSE	Cib1	12768	10833	9921	6601	8345	7305		11174	7417			mito protein domain				4	4	4	4	4	4
	Q924A2	Protein capicua homolog	CIC_MOUSE	Cic	1053	801	825	529	603	625		893	585.667			targetP signal, mito protein domain				8	8	8	8	9	9
	Q9D0V8;Q9D0V8-2;Q9D0V8-3	Cyclin-dependent kinase 2-interacting protein;Isoform 2 of Cyclin-dependent kinase 2-interacting protein;Isoform 3 of Cyclin-dependent kinase 2-interacting protein	CINP_MOUSE	Cinp	631	657	636	468	566	639		641.333	557.667			coexpression				2	2	2	2	2	2
	Q8BWY9	Protein CIP2A	CIP2A_MOUSE	Cip2a	29643	22068	29210	22656	26834	26292		26973.7	25260.7							36	34	34	35	34	35
	P60824	Cold-inducible RNA-binding protein	CIRBP_MOUSE	Cirbp	56425	47451	49744	47529	46307	41553		51206.7	45129.7			yeast mito homolog, mito protein domain				5	5	6	6	5	6
	Q91WS0	CDGSH iron-sulfur domain-containing protein 1	CISD1_MOUSE	Cisd1	209922	207340	206683	140502	184099	165177		207982	163259		MitoCarta3.0	literature, mito protein domain, induction, coexpression++, MS/MS++	MOM	Metabolism > Metals and cofactors > Fe-S cluster biosynthesis | Metabolism > Metals and cofactors > Fe-S-containing proteins		7	8	7	7	7	7
	Q9CQB5	CDGSH iron-sulfur domain-containing protein 2	CISD2_MOUSE	Cisd2	77415	68195	80303	59357	65964	66786		75304.3	64035.7		mito-interacting	literature, mito protein domain, induction, coexpression				7	7	7	7	7	7
	B1AR13	CDGSH iron-sulfur domain-containing protein 3, mitochondrial	CISD3_MOUSE	Cisd3	5965	6704	8191	2103	3991	3223		6953.33	3105.67		MitoCarta3.0	APEX_matrix, mito protein domain, coexpression, MS/MS++	Matrix	Metabolism > Metals and cofactors > Fe-S cluster biosynthesis | Metabolism > Metals and cofactors > Fe-S-containing proteins		4	4	4	4	4	4
	Q62225	Cytokine-inducible SH2-containing protein	CISH_MOUSE	Cish	9737	11113	13510	8003	10308	9489		11453.3	9266.67			mito protein domain				6	6	6	6	6	6
	P49025-5	Isoform 5 of Citron Rho-interacting kinase	CTRO_MOUSE	Cit	6002	5751	6243	5648	6083	5811		5998.67	5847.33			targetP signal, mito protein domain				43	42	43	43	44	42
	Q8VEH2	CDKN1A-interacting zinc finger protein 1	Q8VEH2_MOUSE	Ciz1	1645	2022	1023	1739	2175	2022		1563.33	1978.67							4	5	5	6	7	7
	Q3V1H1	Cytoskeleton-associated protein 2	CKAP2_MOUSE	Ckap2	6272	4399	5667	5303	4498	4696		5446	4832.33			targetP signal				14	14	14	14	13	14
	Q7TS74;Q7TS74-2	Cytoskeleton-associated protein 2-like;Isoform 2 of Cytoskeleton-associated protein 2-like	CKP2L_MOUSE	Ckap2l	442	434	718	741	771	479		531.333	663.667							3	3	4	4	4	3
	A2AGT5;A2AGT5-3	Cytoskeleton-associated protein 5;Isoform 3 of Cytoskeleton-associated protein 5	CKAP5_MOUSE	Ckap5	63791	59989	62732	51210	57020	57492		62170.7	55240.7							103	103	96	99	99	100
	Q04447	Creatine kinase B-type	KCRB_MOUSE	Ckb	9351	9029	10415	7047	9260	8961		9598.33	8422.67			mito protein domain, induction				7	7	7	7	7	7
	P61025	Cyclin-dependent kinases regulatory subunit 1	CKS1_MOUSE	Cks1b	19156	20588	23486	20981	18379	20179		21076.7	19846.3							3	3	3	3	3	3
	P56390	Cyclin-dependent kinases regulatory subunit 2	CKS2_MOUSE	Cks2	20802	21097	25623	24250	22611	20441		22507.3	22434							2	2	2	2	2	2
	Q80TV8;Q80TV8-2	CLIP-associating protein 1;Isoform 2 of CLIP-associating protein 1	CLAP1_MOUSE	Clasp1	8653	8940	8961	7013	7979	7869		8851.33	7620.33							33	31	31	32	33	33
	Q8BRT1	CLIP-associating protein 2	CLAP2_MOUSE	Clasp2	23449	12395	13753	12165	13085	12299		16532.3	12516.3			targetP signal				38	38	37	37	38	38
	Q8BRT1-5	Isoform 2 of CLIP-associating protein 2	CLAP2_MOUSE	Clasp2	3690	3385	3118	2802	3235	2696		3397.67	2911			targetP signal				7	7	7	7	7	7
	Q8CFC7;Q8CFC7-2;Q8CFC7-3	CLK4-associating serine/arginine rich protein;Isoform 2 of CLK4-associating serine/arginine rich protein;Isoform 3 of CLK4-associating serine/arginine rich protein	CLASR_MOUSE	Clasrp	354	437	436	453	468	395		409	438.667							2	2	2	2	2	2
	Q99LI2	Chloride channel CLIC-like protein 1	CLCC1_MOUSE	Clcc1	8904	7126	9793	7409	7845	7577		8607.67	7610.33			coexpression				12	12	12	11	11	11
	P51791;P51791-2	H(+)/Cl(-) exchange transporter 3;Isoform 2 of H(+)/Cl(-) exchange transporter 3	CLCN3_MOUSE	Clcn3	2744	2944	3060	2312	2620	2312		2916	2414.67			mito protein domain				6	7	6	6	6	6
	Q9WVD4	H(+)/Cl(-) exchange transporter 5	CLCN5_MOUSE	Clcn5	1933	1712	1247	869	1095	1109		1630.67	1024.33			mito protein domain				2	2	2	2	2	2
	Q9CQX5	Claudin domain-containing protein 1	CLDN1_MOUSE	Cldnd1	6952	8395	7135	4720	6390	6149		7494	5753							3	3	3	3	3	3
	Q91V08	C-type lectin domain family 2 member D	CLC2D_MOUSE	Clec2d	17582	16630	17492	14331	14823	14438		17234.7	14530.7							7	7	8	8	7	7
	Q9Z1Q5	Chloride intracellular channel protein 1	CLIC1_MOUSE	Clic1	1856446	1837931	2122826	1533765	1754824	1709186		1.93907e+06	1665925							21	20	18	18	19	20
	Q9QYB1	Chloride intracellular channel protein 4	CLIC4_MOUSE	Clic4	170330	162357	140532	98316	124660	117437		157740	113471			literature				18	18	18	18	18	18
	Q99KN9	Clathrin interactor 1	EPN4_MOUSE	Clint1	38064	38864	45441	38854	42004	37846		40789.7	39568							22	22	20	21	21	22
	Q922J3	CAP-Gly domain-containing linker protein 1	CLIP1_MOUSE	Clip1	31356	17071	18027	14159	15181	14786		22151.3	14708.7			MS/MS				49	48	48	45	47	50
	P22518	Dual specificity protein kinase CLK1	CLK1_MOUSE	Clk1	1279	1247	771	567	784	781		1099	710.667			mito protein domain				3	3	3	3	3	3
	O35492	Dual specificity protein kinase CLK3	CLK3_MOUSE	Clk3	8715	7764	8247	6310	7045	7253		8242	6869.33			targetP signal, mito protein domain				11	12	12	11	11	12
	Q3UMW8	Ceroid-lipofuscinosis neuronal protein 5 homolog	CLN5_MOUSE	Cln5	2599	2281	2167	1594	1969	2013		2349	1858.67							3	3	3	3	3	3
	Q61189	Methylosome subunit pICln	ICLN_MOUSE	Clns1a	103774	103398	84608	72850	86484	73436		97260	77590							6	6	6	6	6	6
	Q99LI9	Polyribonucleotide 5'-hydroxyl-kinase Clp1	CLP1_MOUSE	Clp1	14991	13795	13858	11912	12833	11386		14214.7	12043.7							12	12	12	12	12	11
	Q60649	Caseinolytic peptidase B protein homolog	CLPB_MOUSE	Clpb	9982	11148	9789	8457	5893	6397		10306.3	6915.67		MitoCarta3.0	APEX_IMS, targetP signal+, yeast mito homolog+, Rickettsial homolog, mito protein domain, MS/MS++	IMS	Protein import, sorting and homeostasis > Protein homeostasis > Proteases		10	10	10	10	8	10
	O88696	ATP-dependent Clp protease proteolytic subunit, mitochondrial	CLPP_MOUSE	Clpp	25960	24900	29151	24270	27419	21581		26670.3	24423.3		MitoCarta3.0	literature, APEX_matrix, targetP signal, Rickettsial homolog, mito protein domain, induction, coexpression+, MS/MS++	Matrix	Protein import, sorting and homeostasis > Protein homeostasis > Proteases		8	8	8	8	8	7
	Q8VBZ3	Cleft lip and palate transmembrane protein 1 homolog	CLPT1_MOUSE	Clptm1	23050	25364	27063	19062	22473	22990		25159	21508.3			induction				15	16	15	16	16	16
	Q8BXA5	Cleft lip and palate transmembrane protein 1-like protein	CLP1L_MOUSE	Clptm1l	8250	5114	4595	3170	3960	4484		5986.33	3871.33							5	5	5	5	5	5
	Q9JHS4	ATP-dependent Clp protease ATP-binding subunit clpX-like, mitochondrial	CLPX_MOUSE	Clpx	32531	33519	41144	30688	31222	24760		35731.3	28890		MitoCarta3.0	literature, APEX_matrix, targetP signal, yeast mito homolog++, Rickettsial homolog, mito protein domain, induction, coexpression, MS/MS++	Matrix	Protein import, sorting and homeostasis > Protein homeostasis > Proteases		22	22	20	21	21	22
	Q80YR7	Claspin	CLSPN_MOUSE	Clspn	1180	1365	1462	1479	1464	1416		1335.67	1453							7	8	8	8	8	8
	O08585	Clathrin light chain A	CLCA_MOUSE	Clta	95688	99531	121426	88300	97530	92843		105548	92891							8	8	7	8	7	7
	Q6IRU5-2	Isoform 2 of Clathrin light chain B	CLCB_MOUSE	Cltb	17895	16346	19166	14191	17570	14826		17802.3	15529							6	6	6	6	6	6
	Q68FD5	Clathrin heavy chain 1	CLH1_MOUSE	Cltc	440357	401916	406186	287082	346601	329660		416153	321114							110	112	103	104	105	103
	Q5SW19	Clustered mitochondria protein homolog	CLU_MOUSE	Cluh	28876	26781	28651	21033	24725	23858		28102.7	23205.3			induction, coexpression++				44	44	44	44	44	44
	Q8R4N0	Citramalyl-CoA lyase, mitochondrial	CLYBL_MOUSE	Clybl	5656	4871	6631	6425	7136	6801		5719.33	6787.33		MitoCarta3.0	APEX_matrix, targetP signal+, induction, coexpression+, MS/MS++	Matrix	Metabolism > Carbohydrate metabolism > Itaconate metabolism		8	9	9	9	9	10
	Q61419;Q61419-2	Cytidine monophosphate-N-acetylneuraminic acid hydroxylase;Isoform 2 of Cytidine monophosphate-N-acetylneuraminic acid hydroxylase	CMAH_MOUSE	Cmah	7	68	153	577	241	211		76	343			mito protein domain				1	1	3	5	3	4
	Q99KK2	N-acylneuraminate cytidylyltransferase	NEUA_MOUSE	Cmas	76319	75916	79068	50152	65857	65114		77101	60374.3			Rickettsial homolog				20	21	20	19	20	21
	Q9CPZ8	COX assembly mitochondrial protein homolog	COXM1_MOUSE	Cmc1	24817	26240	27334	22529	23848	21623		26130.3	22666.7		MitoCarta3.0	APEX_IMS, GFP, yeast mito homolog++, mito protein domain+, induction, coexpression, MS/MS+	IMS	OXPHOS > Complex IV > CIV assembly factors | OXPHOS > OXPHOS assembly factors		5	5	5	5	5	5
	Q8K199	COX assembly mitochondrial protein 2 homolog	COXM2_MOUSE	Cmc2	17933	17635	16521	13094	13707	11403		17363	12734.7		MitoCarta3.0	APEX_IMS, yeast mito homolog++, mito protein domain+, induction, coexpression, MS/MS+	IMS	OXPHOS > Complex IV > CIV assembly factors | OXPHOS > OXPHOS assembly factors		3	3	3	3	3	3
	Q9D486;Q9D486-2	C-Maf-inducing protein;Isoform 2 of C-Maf-inducing protein	CMIP_MOUSE	Cmip	2121	2614	1326	905	1401	1367		2020.33	1224.33							6	6	6	6	6	6
	Q9DBP5	UMP-CMP kinase	KCY_MOUSE	Cmpk1	335328	333998	312323	198003	249793	266566		327216	238121			targetP signal, Rickettsial homolog, induction				14	15	12	12	12	14
	Q3U5Q7	UMP-CMP kinase 2, mitochondrial	CMPK2_MOUSE	Cmpk2	923	266	972	1303	1173	1050		720.333	1175.33		MitoCarta3.0	literature, targetP signal+, Rickettsial homolog, MS/MS	Matrix	Metabolism > Nucleotide metabolism > Nucleotide synthesis and processing		2	1	4	4	4	4
	Q9CZT6	Protein CMSS1	CMS1_MOUSE	Cmss1	18946	18466	19478	19817	18260	16790		18963.3	18289			mito protein domain				8	8	8	8	8	8
	Q9CZ69	CKLF-like MARVEL transmembrane domain-containing protein 6	CKLF6_MOUSE	Cmtm6	30832	33163	24701	18315	23476	24121		29565.3	21970.7							3	3	3	3	3	3
	Q9ESD6;Q9ESD6-2	CKLF-like MARVEL transmembrane domain-containing protein 7;Isoform 2 of CKLF-like MARVEL transmembrane domain-containing protein 7	CKLF7_MOUSE	Cmtm7	54817	52269	55571	40078	49452	42906		54219	44145.3							4	4	4	4	4	4
	Q9DBC3	Cap-specific mRNA (nucleoside-2'-O-)-methyltransferase 1	CMTR1_MOUSE	Cmtr1	29660	28934	27312	22985	25728	24850		28635.3	24521			mito protein domain				35	36	35	36	36	35
	P53996	Cellular nucleic acid-binding protein	CNBP_MOUSE	Cnbp	389871	298003	385869	220035	274192	220740		357914	238322							12	12	11	11	12	12
	Q9D1A2	Cytosolic non-specific dipeptidase	CNDP2_MOUSE	Cndp2	791435	770371	815106	668925	701475	725097		792304	698499			yeast mito homolog, Rickettsial homolog				35	34	35	35	36	35
	Q3UJ81	Nuclear envelope phosphatase-regulatory subunit 1	NEPR1_MOUSE	Cnep1r1	8136	10213	5830	6277	6968	7096		8059.67	6780.33							3	3	2	3	3	3
	Q08093	Calponin-2	CNN2_MOUSE	Cnn2	323068	279959	299058	249815	272651	254907		300695	259124							19	19	15	16	16	19
	Q32NY4;Q32NY4-2	Metal transporter CNNM3;Isoform 2 of Metal transporter CNNM3	CNNM3_MOUSE	Cnnm3	524	476	420	388	428	401		473.333	405.667			Rickettsial homolog, mito protein domain				2	2	2	2	2	2
	Q6ZQ08;Q6ZQ08-4	CCR4-NOT transcription complex subunit 1;Isoform 4 of CCR4-NOT transcription complex subunit 1	CNOT1_MOUSE	Cnot1	40586	38532	38383	31178	34305	32290		39167	32591							86	85	84	86	84	84
	Q8BH15	CCR4-NOT transcription complex subunit 10	CNO10_MOUSE	Cnot10	15636	14808	15861	12007	13434	12827		15435	12756			mito protein domain				24	23	24	24	23	24
	Q9CWN7	CCR4-NOT transcription complex subunit 11	CNO11_MOUSE	Cnot11	6334	9413	6298	5228	5954	6270		7348.33	5817.33			targetP signal				8	9	8	8	8	8
	Q8C5L3;Q8C5L3-2	CCR4-NOT transcription complex subunit 2;Isoform 2 of CCR4-NOT transcription complex subunit 2	CNOT2_MOUSE	Cnot2	18050	20404	21711	17494	20257	18647		20055	18799.3							13	13	12	11	13	13
	Q8K0V4	CCR4-NOT transcription complex subunit 3	CNOT3_MOUSE	Cnot3	13958	14207	15820	12837	13776	12749		14661.7	13120.7							13	13	13	13	13	13
	Q8BT14;Q8BT14-2;Q8BT14-3	CCR4-NOT transcription complex subunit 4;Isoform 2 of CCR4-NOT transcription complex subunit 4;Isoform 3 of CCR4-NOT transcription complex subunit 4	CNOT4_MOUSE	Cnot4	8341	5580	5843	4998	5817	4767		6588	5194			mito protein domain				8	8	8	8	8	8
	Q8K3P5;Q8K3P5-2	CCR4-NOT transcription complex subunit 6;Isoform 2 of CCR4-NOT transcription complex subunit 6	CNOT6_MOUSE	Cnot6	1465	1450	1421	917	1912	1070		1445.33	1299.67			mito protein domain				3	3	3	3	3	3
	Q8VEG6;Q8VEG6-2	CCR4-NOT transcription complex subunit 6-like;Isoform 2 of CCR4-NOT transcription complex subunit 6-like	CNO6L_MOUSE	Cnot6l	3770	4390	3630	3317	3418	3341		3930	3358.67			mito protein domain				7	8	7	7	7	7
	Q60809	CCR4-NOT transcription complex subunit 7	CNOT7_MOUSE	Cnot7	12400	12024	15084	10084	11664	10465		13169.3	10737.7							9	10	10	10	10	10
	Q9D8X5	CCR4-NOT transcription complex subunit 8	CNOT8_MOUSE	Cnot8	18753	15590	15665	13005	13898	14018		16669.3	13640.3							9	9	9	9	9	8
	Q9JKY0	CCR4-NOT transcription complex subunit 9	CNOT9_MOUSE	Cnot9	50092	46623	50397	37542	39871	37515		49037.3	38309.3							14	14	14	14	14	15
	P16330;P16330-2	2',3'-cyclic-nucleotide 3'-phosphodiesterase;Isoform CNPI of 2',3'-cyclic-nucleotide 3'-phosphodiesterase	CN37_MOUSE	Cnp	72768	67713	65351	54575	57851	57978		68610.7	56801.3			targetP signal				26	26	26	26	26	26
	Q9QXT0	Protein canopy homolog 2	CNPY2_MOUSE	Cnpy2	106662	99482	108628	86311	91197	92440		104924	89982.7							12	13	12	12	12	14
	Q9DAU1	Protein canopy homolog 3	CNPY3_MOUSE	Cnpy3	12824	12314	11932	6757	7993	9890		12356.7	8213.33							7	7	7	7	7	7
	Q8BQ47	Protein canopy homolog 4	CNPY4_MOUSE	Cnpy4	9997	8208	8874	6269	7817	7684		9026.33	7256.67							5	5	4	4	5	5
	Q5M8N0	CB1 cannabinoid receptor-interacting protein 1	CNRP1_MOUSE	Cnrip1	2526	2068	1648	1504	1755	1791		2080.67	1683.33							2	2	2	2	2	2
	Q8CBC4;Q8CBC4-3	Consortin;Isoform 3 of Consortin	CNST_MOUSE	Cnst	472	421	379	265	470	462		424	399							2	2	2	2	2	2
	A2AL36	Centriolin	CNTRL_MOUSE	Cntrl	5745	4050	3445	3335	3599	3038		4413.33	3324			targetP signal, yeast mito homolog, mito protein domain				31	32	32	32	32	29
	Q8CB62;Q8CB62-2	Centrobin;Isoform 2 of Centrobin	CNTRB_MOUSE	Cntrob	827	319	887	258	679	230		677.667	389							3	3	4	3	4	3
	Q9D2R6	Cytochrome c oxidase assembly factor 3 homolog, mitochondrial	COA3_MOUSE	Coa3	39509	46381	47751	37844	42761	42346		44547	40983.7		MitoCarta3.0	APEX_IMS, APEX_matrix, mito protein domain+, coexpression, MS/MS++	MIM	Mitochondrial central dogma > Translation > Translation factors | OXPHOS > Complex IV > CIV assembly factors | OXPHOS > OXPHOS assembly factors		5	5	5	5	5	5
	Q8BGD8	Cytochrome c oxidase assembly factor 6 homolog	COA6_MOUSE	Coa6	10975	8144	9570	8768	9384	9636		9563	9262.67		MitoCarta3.0	APEX_IMS, yeast mito homolog++, mito protein domain+, induction, coexpression+, MS/MS	IMS	OXPHOS > Complex IV > CIV assembly factors | OXPHOS > OXPHOS assembly factors		4	4	4	4	4	4
	Q921H9	Cytochrome c oxidase assembly factor 7	COA7_MOUSE	Coa7	41084	33773	46254	40964	44951	48903		40370.3	44939.3		MitoCarta3.0	literature, APEX_IMS, mito protein domain, coexpression, MS/MS	IMS	OXPHOS > Complex IV > CIV assembly factors | OXPHOS > OXPHOS assembly factors		6	6	6	6	6	6
	Q9DBL7	Bifunctional coenzyme A synthase	COASY_MOUSE	Coasy	12752	11981	11521	8902	10458	11208		12084.7	10189.3		MitoCarta3.0	APEX_matrix, mito protein domain, coexpression, MS/MS++	Matrix	Metabolism > Metals and cofactors > Coenzyme A metabolism		12	12	12	12	12	12
	Q3UMF0;Q3UMF0-3	Cordon-bleu protein-like 1;Isoform 3 of Cordon-bleu protein-like 1	COBL1_MOUSE	Cobll1	9337	9926	10768	6636	9556	9634		10010.3	8608.67			induction, coexpression				27	28	30	29	30	30
	Q9Z160	Conserved oligomeric Golgi complex subunit 1	COG1_MOUSE	Cog1	10137	11179	8046	9478	9804	9000		9787.33	9427.33							19	20	20	20	20	21
	Q921L5	Conserved oligomeric Golgi complex subunit 2	COG2_MOUSE	Cog2	18453	7283	7254	12719	9465	9453		10996.7	10545.7							16	17	17	18	18	19
	Q8CI04	Conserved oligomeric Golgi complex subunit 3	COG3_MOUSE	Cog3	7840	6797	6879	5372	5890	5579		7172	5613.67							19	18	18	19	18	18
	Q8R1U1	Conserved oligomeric Golgi complex subunit 4	COG4_MOUSE	Cog4	5168	4529	4955	4118	4818	4404		4884	4446.67			coexpression				14	13	13	14	14	14
	Q8C0L8	Conserved oligomeric Golgi complex subunit 5	COG5_MOUSE	Cog5	9246	8582	8244	7149	8385	8396		8690.67	7976.67							14	14	15	15	15	15
	Q8R3I3	Conserved oligomeric Golgi complex subunit 6	COG6_MOUSE	Cog6	7557	18282	10781	7626	12041	12243		12206.7	10636.7							10	11	11	12	12	12
	Q3UM29	Conserved oligomeric Golgi complex subunit 7	COG7_MOUSE	Cog7	5034	3546	4163	3900	4550	5377		4247.67	4609							13	13	12	13	10	13
	Q9JJA2	Conserved oligomeric Golgi complex subunit 8	COG8_MOUSE	Cog8	3377	2949	2980	2370	2724	2487		3102	2527							7	7	7	7	7	7
	Q5SU73	Coilin	COIL_MOUSE	Coil	3852	3004	3333	3009	3137	2530		3396.33	2892							6	6	6	6	7	7
	P11087	Collagen alpha-1(I) chain	CO1A1_MOUSE	Col1a1	269	281	358	224	195	221		302.667	213.333							2	2	2	2	2	2
	P02463	Collagen alpha-1(IV) chain	CO4A1_MOUSE	Col4a1	121	244	319	194	214	288		228	232							1	2	2	2	2	2
	Q8K297	Procollagen galactosyltransferase 1	GT251_MOUSE	Colgalt1	25421	21997	22268	18070	20135	19248		23228.7	19151							16	17	16	16	16	17
	Q8K4M5	COMM domain-containing protein 1	COMD1_MOUSE	Commd1	9814	9619	9654	7090	8177	7671		9695.67	7646			coexpression				5	5	5	5	5	5
	Q8JZY2	COMM domain-containing protein 10	COMDA_MOUSE	Commd10	16165	16184	17451	13298	15484	14050		16600	14277.3							6	5	6	6	6	5
	Q8BXC6	COMM domain-containing protein 2	COMD2_MOUSE	Commd2	48585	38994	39459	27731	32188	32845		42346	30921.3							10	10	10	10	10	10
	Q63829	COMM domain-containing protein 3	COMD3_MOUSE	Commd3	44662	39219	33639	22346	31181	20907		39173.3	24811.3			induction				9	9	9	9	9	9
	Q9CQ02	COMM domain-containing protein 4	COMD4_MOUSE	Commd4	14084	9570	16365	12376	12350	10738		13339.7	11821.3							6	7	7	7	7	6
	Q8R395	COMM domain-containing protein 5	COMD5_MOUSE	Commd5	34543	32798	25136	21070	24864	16683		30825.7	20872.3							7	7	7	7	7	7
	Q3V4B5	COMM domain-containing protein 6	COMD6_MOUSE	Commd6	12162	15163	12019	8750	10993	11098		13114.7	10280.3							3	3	3	3	3	3
	Q8BG94	COMM domain-containing protein 7	COMD7_MOUSE	Commd7	2798	2372	2281	2051	2110	1259		2483.67	1806.67							3	3	3	3	2	2
	Q9CZG3	COMM domain-containing protein 8	COMD8_MOUSE	Commd8	2236	2333	2645	3564	2697	2874		2404.67	3045							2	3	4	4	3	4
	Q8K2Q0	COMM domain-containing protein 9	COMD9_MOUSE	Commd9	11955	11265	8895	7721	9179	7329		10705	8076.33			coexpression				6	6	6	6	6	6
	O88587;O88587-2	Catechol O-methyltransferase;Isoform Soluble of Catechol O-methyltransferase	COMT_MOUSE	Comt	57621	38642	37519	32359	37884	29112		44594	33118.3		MitoCarta3.0	GFP, induction, coexpression	Membrane	Metabolism > Amino acid metabolism > Catechol metabolism		11	13	10	10	12	13
	Q8BIG7	Catechol O-methyltransferase domain-containing protein 1	CMTD1_MOUSE	Comtd1	25823	24586	15502	17272	20927	20384		21970.3	19527.7		MitoCarta3.0	GFP, MS/MS++	Membrane			9	9	9	9	9	9
	Q8CIE6	Coatomer subunit alpha	COPA_MOUSE	Copa	191897	180534	177959	127279	152431	151278		183463	143663			mito protein domain				78	79	75	74	76	77
	Q9JIF7	Coatomer subunit beta	COPB_MOUSE	Copb1	199037	177239	173021	122796	142123	141420		183099	135446							58	55	53	54	55	57
	O55029	Coatomer subunit beta'	COPB2_MOUSE	Copb2	138979	139232	147712	109122	124633	119439		141974	117731			mito protein domain				46	47	43	45	45	47
	O89079	Coatomer subunit epsilon	COPE_MOUSE	Cope	102541	99585	106403	80138	96555	67676		102843	81456.3							12	12	12	13	12	12
	Q9QZE5	Coatomer subunit gamma-1	COPG1_MOUSE	Copg1	119245	112547	114839	81204	93707	87570		115544	87493.7							48	48	45	46	47	47
	Q9QXK3	Coatomer subunit gamma-2	COPG2_MOUSE	Copg2	46998	43240	41724	28000	34414	32464		43987.3	31626							31	32	30	30	31	31
	P61202	COP9 signalosome complex subunit 2	CSN2_MOUSE	Cops2	79714	76973	71374	54467	62536	62587		76020.3	59863.3							23	23	22	23	21	23
	O88543	COP9 signalosome complex subunit 3	CSN3_MOUSE	Cops3	58827	59525	60178	43080	51691	48537		59510	47769.3			coexpression				19	18	18	19	17	18
	O88544	COP9 signalosome complex subunit 4	CSN4_MOUSE	Cops4	88319	92016	90992	69324	79516	75213		90442.3	74684.3			coexpression				24	23	24	24	23	23
	O35864	COP9 signalosome complex subunit 5	CSN5_MOUSE	Cops5	92466	86634	77063	59359	70867	64948		85387.7	65058			targetP signal, coexpression				19	19	18	18	17	18
	O88545	COP9 signalosome complex subunit 6	CSN6_MOUSE	Cops6	62921	60320	58673	44290	51817	48734		60638	48280.3			coexpression				14	14	14	14	14	14
	Q9CZ04-2	Isoform 2 of COP9 signalosome complex subunit 7a	CSN7A_MOUSE	Cops7a	27766	30249	28581	23372	26892	27772		28865.3	26012							10	10	10	10	9	11
	Q8BV13	COP9 signalosome complex subunit 7b	CSN7B_MOUSE	Cops7b	13886	14125	13571	11035	11814	12221		13860.7	11690							7	7	7	7	7	7
	Q8VBV7	COP9 signalosome complex subunit 8	CSN8_MOUSE	Cops8	81888	99571	123329	77934	100146	88286		101596	88788.7			coexpression				7	7	7	7	7	7
	P61924	Coatomer subunit zeta-1	COPZ1_MOUSE	Copz1	90400	176458	155268	125518	113528	83188		140709	107411							7	7	6	6	7	7
	Q8BMS4	Ubiquinone biosynthesis O-methyltransferase, mitochondrial	COQ3_MOUSE	Coq3	2284	1968	2290	2077	2277	2116		2180.67	2156.67		MitoCarta3.0	APEX_matrix, targetP signal+, yeast mito homolog++, Rickettsial homolog, mito protein domain+, induction, coexpression+, MS/MS+	MIM	Metabolism > Metals and cofactors > Coenzyme Q metabolism		3	3	3	3	3	3
	Q9CXI0	2-methoxy-6-polyprenyl-1,4-benzoquinol methylase, mitochondrial	COQ5_MOUSE	Coq5	3383	4911	7560	4121	5805	3373		5284.67	4433		MitoCarta3.0	APEX_matrix, targetP signal, yeast mito homolog+, Rickettsial homolog, mito protein domain+, induction, coexpression++, MS/MS++	MIM	Metabolism > Metals and cofactors > Coenzyme Q metabolism		6	8	7	7	8	7
	Q8R1S0	Ubiquinone biosynthesis monooxygenase COQ6, mitochondrial	COQ6_MOUSE	Coq6	14398	24657	18379	51606	42390	20819		19144.7	38271.7		MitoCarta3.0	literature, APEX_matrix, targetP signal, yeast mito homolog++, Rickettsial homolog, mito protein domain, induction, coexpression+, MS/MS+	MIM	Metabolism > Metals and cofactors > Coenzyme Q metabolism		6	6	6	5	6	6
	P97478	5-demethoxyubiquinone hydroxylase, mitochondrial	COQ7_MOUSE	Coq7	3523	3190	2899	2828	2867	2471		3204	2722		MitoCarta3.0	literature, targetP signal, yeast mito homolog++, Rickettsial homolog, mito protein domain+, coexpression++, MS/MS++	MIM	Metabolism > Metals and cofactors > Coenzyme Q metabolism		4	3	4	4	4	4
	Q8K1Z0	Ubiquinone biosynthesis protein COQ9, mitochondrial	COQ9_MOUSE	Coq9	2290	3161	2492	2142	2753	2150		2647.67	2348.33		MitoCarta3.0	APEX_matrix, targetP signal+, yeast mito homolog++, Rickettsial homolog, mito protein domain+, induction, coexpression, MS/MS++	MIM	Metabolism > Metals and cofactors > Coenzyme Q metabolism		5	5	5	5	5	5
	O89053	Coronin-1A	COR1A_MOUSE	Coro1a	2741572	2767095	2761620	2503150	2623594	2529563		2.75676e+06	2.5521e+06			targetP signal, mito protein domain				32	34	29	30	31	31
	Q9WUM3	Coronin-1B	COR1B_MOUSE	Coro1b	64520	68085	65723	52085	59346	60620		66109.3	57350.3			targetP signal, mito protein domain				18	18	17	17	17	17
	Q9WUM4	Coronin-1C	COR1C_MOUSE	Coro1c	134151	137938	133497	103376	119465	119688		135195	114176			targetP signal, mito protein domain				26	28	21	22	22	25
	Q8C0P5	Coronin-2A	COR2A_MOUSE	Coro2a	39721	42745	36798	41695	41355	34686		39754.7	39245.3			targetP signal, mito protein domain				17	17	17	17	17	17
	Q9D2V7	Coronin-7	CORO7_MOUSE	Coro7	44385	39478	43646	48128	46985	40851		42503	45321.3			targetP signal, mito protein domain				41	40	39	40	39	40
	Q9CQI6	Coactosin-like protein	COTL1_MOUSE	Cotl1	1264925	1155884	1053622	991159	869553	911873		1.15814e+06	924195							15	15	13	13	14	12
	Q8BJ03;Q8BJ03-2	Cytochrome c oxidase assembly protein COX15 homolog;Isoform 2 of Cytochrome c oxidase assembly protein COX15 homolog	COX15_MOUSE	Cox15	5956	5768	5410	4475	4793	5381		5711.33	4883		MitoCarta3.0	literature, targetP signal, yeast mito homolog++, Rickettsial homolog, mito protein domain+, coexpression++, MS/MS	MIM	OXPHOS > Complex IV > CIV assembly factors | Metabolism > Metals and cofactors > Heme synthesis and processing | OXPHOS > OXPHOS assembly factors		8	8	7	7	7	8
	Q9CR63	Cytochrome c oxidase assembly protein COX16 homolog, mitochondrial	COX16_MOUSE	Cox16	8171	7888	9385	7714	7932	7807		8481.33	7817.67		MitoCarta3.0	APEX_IMS, GFP, targetP signal, yeast mito homolog++, mito protein domain+, MS/MS+	MIM	OXPHOS > Complex IV > CIV assembly factors | OXPHOS > OXPHOS assembly factors		2	2	2	2	2	2
	P56394	Cytochrome c oxidase copper chaperone	COX17_MOUSE	Cox17	20370	21296	21409	15755	16115	8231		21025	13367		MitoCarta3.0	literature, APEX_IMS, yeast mito homolog, mito protein domain+, induction, coexpression++, MS/MS++	IMS	OXPHOS > Complex IV > CIV assembly factors | Metabolism > Metals and cofactors > Copper metabolism | OXPHOS > OXPHOS assembly factors		5	4	4	5	4	4
	Q9D7J4	Cytochrome c oxidase assembly protein COX20, mitochondrial	COX20_MOUSE	Cox20	20156	19735	25086	20663	22236	18649		21659	20516		MitoCarta3.0	literature, APEX_IMS, GFP, yeast mito homolog++, MS/MS	MIM	OXPHOS > Complex IV > CIV assembly factors | OXPHOS > OXPHOS assembly factors		4	4	4	4	4	4
	P19783	Cytochrome c oxidase subunit 4 isoform 1, mitochondrial	COX41_MOUSE	Cox4i1	546470	608285	594858	539367	577253	535460		583204	550693		MitoCarta3.0	literature, APEX_IMS, APEX_matrix, targetP signal, mito protein domain+, coexpression++, MS/MS++	MIM	OXPHOS > Complex IV > CIV subunits | OXPHOS > OXPHOS subunits		11	12	11	10	10	12
	P12787	Cytochrome c oxidase subunit 5A, mitochondrial	COX5A_MOUSE	Cox5a	91016	96339	89367	80583	93712	55932		92240.7	76742.3		MitoCarta3.0	literature, APEX_IMS, APEX_matrix, targetP signal+, yeast mito homolog++, mito protein domain+, induction, coexpression++, MS/MS++	MIM	OXPHOS > Complex IV > CIV subunits | OXPHOS > OXPHOS subunits		6	7	6	5	5	6
	P19536	Cytochrome c oxidase subunit 5B, mitochondrial	COX5B_MOUSE	Cox5b	208238	220831	157126	179172	193192	102637		195398	158334							8	8	8	8	8	8
	P43024	Cytochrome c oxidase subunit 6A1, mitochondrial	CX6A1_MOUSE	Cox6a1	24963	27113	12989	15151	13577	16714		21688.3	15147.3		MitoCarta3.0	literature, targetP signal+, yeast mito homolog+, mito protein domain+, induction, coexpression, MS/MS++	MIM	OXPHOS > Complex IV > CIV subunits | OXPHOS > OXPHOS subunits		2	2	2	2	2	2
	P56391	Cytochrome c oxidase subunit 6B1	CX6B1_MOUSE	Cox6b1	591925	624523	650151	630490	619007	583521		622200	611006		MitoCarta3.0	literature, APEX_IMS, yeast mito homolog+, mito protein domain+, coexpression++, MS/MS++	MIM	OXPHOS > Complex IV > CIV subunits | OXPHOS > OXPHOS subunits		8	8	6	6	6	6
	Q9CPQ1	Cytochrome c oxidase subunit 6C	COX6C_MOUSE	Cox6c	651918	737295	726754	691688	729290	731694		705322	717557		MitoCarta3.0	literature, APEX_IMS, APEX_matrix, targetP signal, mito protein domain+, induction, coexpression++, MS/MS++	MIM	OXPHOS > Complex IV > CIV subunits | OXPHOS > OXPHOS subunits		10	10	10	10	10	10
	P48771	Cytochrome c oxidase subunit 7A2, mitochondrial	CX7A2_MOUSE	Cox7a2	13107	11928	11579	9412	9601	8375		12204.7	9129.33		MitoCarta3.0	literature, targetP signal, mito protein domain+, induction, coexpression++, MS/MS++	MIM	OXPHOS > Complex IV > CIV subunits | OXPHOS > OXPHOS subunits		2	2	2	2	2	2
	Q61387	Cytochrome c oxidase subunit 7A-related protein, mitochondrial	COX7R_MOUSE	Cox7a2l	6962	7920	7472	5941	6629	6660		7451.33	6410		MitoCarta3.0	literature, APEX_IMS, APEX_matrix, mito protein domain+, MS/MS+	MIM	OXPHOS > Complex IV > CIV subunits | OXPHOS > OXPHOS subunits | OXPHOS > OXPHOS assembly factors | OXPHOS > Respirasome assembly		2	2	2	2	2	2
	P17665	Cytochrome c oxidase subunit 7C, mitochondrial	COX7C_MOUSE	Cox7c	54426	46187	52069	48144	48142	39107		50894	45131		MitoCarta3.0	literature, APEX_IMS, targetP signal, yeast mito homolog++, mito protein domain+, MS/MS++	MIM	OXPHOS > Complex IV > CIV subunits | OXPHOS > OXPHOS subunits		2	2	2	2	2	2
	Q9JHH6	Carboxypeptidase B2	CBPB2_MOUSE	Cpb2	2158	1899	1695	1585	1766	1579		1917.33	1643.33			mito protein domain				2	2	2	2	2	2
	Q7TN98;Q7TN98-2;Q7TN98-3;Q7TN98-4;Q7TN98-5	Cytoplasmic polyadenylation element-binding protein 4;Isoform 2 of Cytoplasmic polyadenylation element-binding protein 4;Isoform 3 of Cytoplasmic polyadenylation element-binding protein 4;Isoform 4 of Cytoplasmic polyadenylation element-binding protein 4;Isoform 5 of Cytoplasmic polyadenylation element-binding protein 4	CPEB4_MOUSE	Cpeb4	1019	1063	937	340	622	614		1006.33	525.333			yeast mito homolog, mito protein domain				5	5	5	5	5	5
	Q8C166	Copine-1	CPNE1_MOUSE	Cpne1	82202	79922	76217	59180	71603	68237		79447	66340			yeast mito homolog				20	19	17	19	20	19
	P59108	Copine-2	CPNE2_MOUSE	Cpne2	275	947	1197	816	187	1073		806.333	692			yeast mito homolog				2	2	2	2	1	2
	Q8BT60	Copine-3	CPNE3_MOUSE	Cpne3	50399	45303	44869	41329	46178	42272		46857	43259.7			yeast mito homolog				18	18	18	18	18	18
	P36552	Oxygen-dependent coproporphyrinogen-III oxidase, mitochondrial	HEM6_MOUSE	Cpox	49836	46083	42731	39309	42062	42265		46216.7	41212		MitoCarta3.0	literature, APEX_IMS, APEX_matrix, targetP signal, Rickettsial homolog, mito protein domain, coexpression, MS/MS++	MIM	Metabolism > Metals and cofactors > Heme synthesis and processing		21	21	21	20	21	21
	Q8BFS6;Q8BFS6-3;Q8BFS6-4	Serine/threonine-protein phosphatase CPPED1;Isoform 3 of Serine/threonine-protein phosphatase CPPED1;Isoform 4 of Serine/threonine-protein phosphatase CPPED1	CPPED_MOUSE	Cpped1	4328	5022	4841	4478	2564	3065		4730.33	3369			coexpression+				3	3	3	3	3	3
	Q9EPU4	Cleavage and polyadenylation specificity factor subunit 1	CPSF1_MOUSE	Cpsf1	33443	30884	22163	24272	25489	26900		28830	25553.7			yeast mito homolog				44	44	42	42	43	42
	O35218	Cleavage and polyadenylation specificity factor subunit 2	CPSF2_MOUSE	Cpsf2	43560	42391	43192	36025	38813	36340		43047.7	37059.3			mito protein domain				35	34	32	33	32	35
	Q9QXK7	Cleavage and polyadenylation specificity factor subunit 3	CPSF3_MOUSE	Cpsf3	47084	45409	46631	40618	43536	40769		46374.7	41641			Rickettsial homolog, mito protein domain				31	31	29	29	31	31
	Q8BQZ5	Cleavage and polyadenylation specificity factor subunit 4	CPSF4_MOUSE	Cpsf4	33663	30951	37605	29817	33550	27358		34073	30241.7							10	10	10	10	10	10
	Q8BQZ5-2;Q8BQZ5-3	Isoform 2 of Cleavage and polyadenylation specificity factor subunit 4;Isoform 3 of Cleavage and polyadenylation specificity factor subunit 4	CPSF4_MOUSE	Cpsf4	5573	5152	5405	4616	4923	5049		5376.67	4862.67							2	2	2	2	2	2
	Q6NVF9	Cleavage and polyadenylation specificity factor subunit 6	CPSF6_MOUSE	Cpsf6	140856	140156	155929	128513	144473	131718		145647	134901			mito protein domain				16	17	16	16	16	15
	Q8BTV2;Q8BTV2-2	Cleavage and polyadenylation specificity factor subunit 7;Isoform 2 of Cleavage and polyadenylation specificity factor subunit 7	CPSF7_MOUSE	Cpsf7	21431	20252	20558	18921	19621	18236		20747	18926			mito protein domain				14	14	14	14	14	14
	P97742	Carnitine O-palmitoyltransferase 1, liver isoform	CPT1A_MOUSE	Cpt1a	3758	3997	4047	4360	4263	3696		3934	4106.33		MitoCarta3.0	literature, yeast mito homolog+, mito protein domain, induction, coexpression, MS/MS++	MOM	Metabolism > Lipid metabolism > Fatty acid oxidation | Metabolism > Metals and cofactors > Carnitine synthesis and transport | Metabolism > Metals and cofactors > Carnitine shuttle		10	11	11	11	11	11
	P52825	Carnitine O-palmitoyltransferase 2, mitochondrial	CPT2_MOUSE	Cpt2	9376	10481	8819	8143	11020	8675		9558.67	9279.33		MitoCarta3.0	literature, APEX_matrix, targetP signal, yeast mito homolog++, mito protein domain, induction, coexpression+, MS/MS++	MIM	Metabolism > Lipid metabolism > Fatty acid oxidation | Metabolism > Metals and cofactors > Carnitine synthesis and transport | Metabolism > Metals and cofactors > Carnitine shuttle		20	20	19	17	20	20
	Q64735;Q64735-2	Complement component receptor 1-like protein;Isoform 2 of Complement component receptor 1-like protein	CR1L_MOUSE	Cr1l	28785	28637	26596	20515	22531	20841		28006	21295.7							11	11	11	11	11	11
	O88843	Death domain-containing protein CRADD	CRADD_MOUSE	Cradd	8123	6046	4782	6631	6320	4724		6317	5891.67			mito protein domain, coexpression				6	6	6	6	5	6
	Q8C7D2;Q8C7D2-2;Q8C7D2-3	Protein cereblon;Isoform 2 of Protein cereblon;Isoform 3 of Protein cereblon	CRBN_MOUSE	Crbn	3815	3011	4615	3979	4442	3646		3813.67	4022.33			mito protein domain				6	6	6	7	7	7
	O35427	DNA-directed RNA polymerase III subunit RPC9	RPC9_MOUSE	Crcp	7060	4868	1418	1767	1993	1632		4448.67	1797.33							2	2	1	2	1	1
	Q01147	Cyclic AMP-responsive element-binding protein 1	CREB1_MOUSE	Creb1	28893	33498	36682	34984	34934	36672		33024.3	35530			mito protein domain				5	5	6	6	6	6
	P45481	Histone lysine acetyltransferase CREBBP	CBP_MOUSE	Crebbp	3495	3054	3593	2857	3144	2870		3380.67	2957							25	23	24	23	25	26
	O88668	Protein CREG1	CREG1_MOUSE	Creg1	8165	8373	5842	4357	4537	4827		7460	4573.67			MS/MS+				2	2	2	2	2	2
	Q9CYA0	Protein disulfide isomerase Creld2	CREL2_MOUSE	Creld2	55512	56926	60997	37885	49784	50143		57811.7	45937.3							15	14	14	14	14	14
	P63254	Cysteine-rich protein 1	CRIP1_MOUSE	Crip1	745923	703396	892203	1038382	854301	708326		780507	867003			MS/MS+				7	7	7	7	7	7
	Q9DCT8	Cysteine-rich protein 2	CRIP2_MOUSE	Crip2	1447	1466	1664	1489	1590	1502		1525.67	1527			induction				2	2	2	2	2	2
	O70333	Cysteine-rich PDZ-binding protein	CRIPT_MOUSE	Cript	14815	12175	13363	12540	12930	11407		13451	12292.3			coexpression				2	2	2	2	2	2
	Q64010;Q64010-2	Adapter molecule crk;Isoform Crk-I of Adapter molecule crk	CRK_MOUSE	Crk	7577	7965	7848	6044	6905	6525		7796.67	6491.33			yeast mito homolog, mito protein domain				7	7	7	7	7	6
	P47941	Crk-like protein	CRKL_MOUSE	Crkl	94811	87798	96633	73166	85275	86367		93080.7	81602.7			yeast mito homolog, mito protein domain				18	18	16	17	17	17
	Q8CII9;Q8CII9-3	Cytokine receptor-like factor 2;Isoform 3 of Cytokine receptor-like factor 2	CRLF2_MOUSE	Crlf2	8749	8872	8529	6145	6565	6596		8716.67	6435.33							4	5	5	5	5	5
	Q9Z2L7	Cytokine receptor-like factor 3	CRLF3_MOUSE	Crlf3	41481	36461	35173	29474	31811	32628		37705	31304.3			induction				16	16	14	14	14	15
	P97427	Dihydropyrimidinase-related protein 1	DPYL1_MOUSE	Crmp1	62907	63389	70249	63205	68225	63268		65515	64899.3							25	26	25	26	25	26
	P63154	Crooked neck-like protein 1	CRNL1_MOUSE	Crnkl1	32455	30586	30909	28640	27832	27930		31316.7	28134							28	28	27	27	26	28
	Q8CJ40-2	Isoform 2 of Rootletin	CROCC_MOUSE	Crocc	456	148	124	117	127	113		242.667	119							2	2	2	2	2	2
	Q9DC50	Peroxisomal carnitine O-octanoyltransferase	OCTC_MOUSE	Crot	42278	41644	39469	27217	32472	33583		41130.3	31090.7		MitoCarta3.0	yeast mito homolog+, mito protein domain, induction, coexpression, MS/MS	unknown	Metabolism > Lipid metabolism > Fatty acid oxidation		22	24	23	23	23	24
	Q149L7;Q149L7-3	Cytotoxic and regulatory T-cell molecule;Isoform 3 of Cytotoxic and regulatory T-cell molecule	CRTAM_MOUSE	Crtam	2159	5096	250	605	550	699		2501.67	618							2	2	2	1	3	2
	Q3U182	CREB-regulated transcription coactivator 2	CRTC2_MOUSE	Crtc2	743	645	818	856	892	753		735.333	833.667							2	2	2	2	2	2
	Q91X84	CREB-regulated transcription coactivator 3	CRTC3_MOUSE	Crtc3	1185	1436	971	845	989	1372		1197.33	1068.67							2	2	2	2	2	2
	P97784	Cryptochrome-1	CRY1_MOUSE	Cry1	747	605	540	395	468	322		630.667	395		MitoCarta3.0	literature, yeast mito homolog, mito protein domain, coexpression	unknown			2	2	2	2	2	1
	A0A0G2JG52;E9PVP1	Crystallin beta-gamma domain-containing 1	A0A0G2JG52_MOUSE;E9PVP1_MOUSE	Crybg1	12473	11146	10435	7865	9384	9116		11351.3	8788.33							19	18	19	20	20	20
	Q99KP3	Lambda-crystallin homolog	CRYL1_MOUSE	Cryl1	1817	1976	1401	2125	1487	1456		1731.33	1689.33			yeast mito homolog, Rickettsial homolog, mito protein domain				4	4	4	5	4	3
	P47199	Quinone oxidoreductase	QOR_MOUSE	Cryz	3350	3285	2090	1944	3122	3219		2908.33	2761.67		MitoCarta3.0	APEX_matrix, mito protein domain, MS/MS	Matrix			5	5	4	5	5	5
	Q921W4	Quinone oxidoreductase-like protein 1	QORL1_MOUSE	Cryzl1	8630	8636	8810	5740	7510	7386		8692	6878.67			mito protein domain				8	9	9	8	9	9
	Q9CZU6	Citrate synthase, mitochondrial	CISY_MOUSE	Cs	460466	504302	478648	356625	432675	447396		481139	412232		MitoCarta3.0	literature, APEX_matrix, targetP signal, yeast mito homolog+, Rickettsial homolog, mito protein domain, induction, coexpression++, MS/MS++	Matrix	Metabolism > Carbohydrate metabolism > TCA cycle		21	21	20	20	20	21
	Q91W50	Cold shock domain-containing protein E1	CSDE1_MOUSE	Csde1	110523	114702	124283	88749	105741	101925		116503	98805			coexpression				42	42	41	42	42	42
	Q9ERK4	Exportin-2	XPO2_MOUSE	Cse1l	160177	145894	160511	134122	147681	133864		155527	138556							58	56	56	58	56	56
	P41241	Tyrosine-protein kinase CSK	CSK_MOUSE	Csk	184946	169044	181322	176554	178413	163406		178437	172791			mito protein domain				24	24	24	24	24	24
	Q8BK63-2	Isoform 2 of Casein kinase I isoform alpha	KC1A_MOUSE	Csnk1a1	64694	62436	59455	45854	51732	54102		62195	50562.7			mito protein domain				16	15	16	16	16	16
	Q9DC28;Q9DC28-2	Casein kinase I isoform delta;Isoform 2 of Casein kinase I isoform delta	KC1D_MOUSE	Csnk1d	14348	13130	13767	11463	13401	12010		13748.3	12291.3			mito protein domain				11	11	11	10	11	11
	Q8BTH8	Casein kinase I isoform gamma-1	KC1G1_MOUSE	Csnk1g1	2463	1378	1467	1227	1293	1474		1769.33	1331.33			mito protein domain				3	3	3	3	3	2
	Q8C4X2	Casein kinase I isoform gamma-3	KC1G3_MOUSE	Csnk1g3	4929	5197	5603	4482	4573	4751		5243	4602			mito protein domain				7	8	7	7	7	8
	Q60737	Casein kinase II subunit alpha	CSK21_MOUSE	Csnk2a1	153822	148429	140535	108279	126153	126709		147595	120380			mito protein domain, induction, coexpression				20	20	20	19	20	20
	O54833	Casein kinase II subunit alpha'	CSK22_MOUSE	Csnk2a2	47057	43959	40744	33432	37798	38340		43920	36523.3			mito protein domain				16	16	16	16	17	17
	P67871	Casein kinase II subunit beta	CSK2B_MOUSE	Csnk2b	146834	156630	187607	149492	155071	142426		163690	148996							9	10	9	9	9	9
	P97315	Cysteine and glycine-rich protein 1	CSRP1_MOUSE	Csrp1	108647	88726	107116	87336	96725	85805		101496	89955.3							11	11	11	11	11	11
	P21460	Cystatin-C	CYTC_MOUSE	Cst3	10181	13169	15703	9919	12590	11581		13017.7	11363.3			MS/MS				4	4	4	4	4	4
	O89098	Cystatin-F	CYTF_MOUSE	Cst7	9492	10020	13897	10853	11813	11017		11136.3	11227.7							2	2	2	2	2	2
	Q62426	Cystatin-B	CYTB_MOUSE	Cstb	190977	208411	792056	121873	172716	658663		397148	317751			MS/MS				5	5	5	5	5	5
	Q99LC2	Cleavage stimulation factor subunit 1	CSTF1_MOUSE	Cstf1	44450	44090	45339	35001	39847	42837		44626.3	39228.3			mito protein domain				15	15	15	15	14	14
	Q8BIQ5	Cleavage stimulation factor subunit 2	CSTF2_MOUSE	Cstf2	62914	66374	75375	65293	63180	50393		68221	59622			mito protein domain				18	18	17	17	18	18
	Q8C7E9	Cleavage stimulation factor subunit 2 tau variant	CSTFT_MOUSE	Cstf2t	3274	3281	3788	2935	3359	3063		3447.67	3119			mito protein domain, induction				5	5	5	5	5	5
	Q99LI7	Cleavage stimulation factor subunit 3	CSTF3_MOUSE	Cstf3	50664	47599	48560	47595	57087	55434		48941	53372			yeast mito homolog				25	25	23	24	24	25
	O88712;O88712-2	C-terminal-binding protein 1;Isoform 2 of C-terminal-binding protein 1	CTBP1_MOUSE	Ctbp1	38810	33318	31731	33677	33740	29972		34619.7	32463			targetP signal, mito protein domain				13	13	13	13	13	13
	Q8R242	Di-N-acetylchitobiase	DIAC_MOUSE	Ctbs	1866	1756	1418	1039	1261	959		1680	1086.33			MS/MS				5	5	5	5	5	4
	Q5SUQ9	CST complex subunit CTC1	CTC1_MOUSE	Ctc1	6256	6200	5578	4811	5587	5500		6011.33	5299.33							18	18	20	19	21	20
	Q61164	Transcriptional repressor CTCF	CTCF_MOUSE	Ctcf	11728	14273	17355	14926	13881	14040		14452	14282.3							26	26	25	25	25	26
	Q7TSG2	RNA polymerase II subunit A C-terminal domain phosphatase	CTDP1_MOUSE	Ctdp1	14182	14613	15520	13554	14747	13638		14771.7	13979.7			mito protein domain				29	29	28	29	29	29
	P58466	Carboxy-terminal domain RNA polymerase II polypeptide A small phosphatase 1	CTDS1_MOUSE	Ctdsp1	1317	2750	3023	3404	2965	2514		2363.33	2961			mito protein domain, coexpression				1	4	3	4	4	3
	Q8BG15	CTD small phosphatase-like protein 2	CTSL2_MOUSE	Ctdspl2	13857	13884	12030	11188	11675	12313		13257	11725.3			targetP signal, mito protein domain				15	15	14	13	14	15
	P12399	Protein CTLA-2-alpha	CTL2A_MOUSE	Ctla2a	24166	27900	28582	22130	20698	13844		26882.7	18890.7							7	7	7	7	7	7
	P09793	Cytotoxic T-lymphocyte protein 4	CTLA4_MOUSE	Ctla4	4538	4273	4742	2842	3621	2998		4517.67	3153.67							3	4	4	3	3	3
	P26231	Catenin alpha-1	CTNA1_MOUSE	Ctnna1	23152	19782	21347	12449	15281	19168		21427	15632.7							27	28	29	28	29	28
	Q02248	Catenin beta-1	CTNB1_MOUSE	Ctnnb1	1029	306	203	14	159	270		512.667	147.667							3	3	1	1	2	2
	Q9CWL8	Beta-catenin-like protein 1	CTBL1_MOUSE	Ctnnbl1	49650	41473	47831	41377	43653	39114		46318	41381.3							28	30	26	26	27	28
	P70698	CTP synthase 1	PYRG1_MOUSE	Ctps1	85929	76822	82515	61540	69386	67795		81755.3	66240.3			Rickettsial homolog, mito protein domain				25	25	25	25	25	25
	P70303	CTP synthase 2	PYRG2_MOUSE	Ctps2	35264	33196	31929	30577	30931	28008		33463	29838.7			Rickettsial homolog, mito protein domain, MS/MS				24	24	24	25	25	23
	Q62018	RNA polymerase-associated protein CTR9 homolog	CTR9_MOUSE	Ctr9	16014	13414	14035	11810	13395	11692		14487.7	12299			mito protein domain				27	27	27	27	27	27
	P16675	Lysosomal protective protein	PPGB_MOUSE	Ctsa	16799	15626	12453	12105	13594	14648		14959.3	13449							12	11	11	11	12	12
	P10605	Cathepsin B	CATB_MOUSE	Ctsb	44279	51514	47304	32875	43663	40517		47699	39018.3			MS/MS++				11	12	11	11	11	10
	P97821	Dipeptidyl peptidase 1	CATC_MOUSE	Ctsc	33987	35044	33501	28830	29829	28473		34177.3	29044							12	12	11	12	10	10
	P18242	Cathepsin D	CATD_MOUSE	Ctsd	635910	702553	661681	331914	487554	513800		666715	444423			yeast mito homolog, MS/MS++				22	22	17	18	19	19
	O70370	Cathepsin S	CATS_MOUSE	Ctss	8640	7857	8946	13488	11718	9630		8481	11612							8	5	7	8	8	8
	P56203	Cathepsin W	CATW_MOUSE	Ctsw	38292	35088	37089	31157	30660	27694		36823	29837							18	17	16	16	16	15
	Q9WUU7	Cathepsin Z	CATZ_MOUSE	Ctsz	26342	26131	46713	21549	42192	39683		33062	34474.7			MS/MS				10	10	10	10	10	10
	Q99J10	Cytoplasmic tRNA 2-thiolation protein 1	CTU1_MOUSE	Ctu1	5668	4472	4628	3087	3443	3528		4922.67	3352.67			targetP signal, yeast mito homolog, Rickettsial homolog, mito protein domain				7	7	7	7	7	7
	Q3U308	Cytoplasmic tRNA 2-thiolation protein 2	CTU2_MOUSE	Ctu2	12916	13301	13662	10163	11730	11888		13293	11260.3							11	11	11	11	11	11
	Q9WTX6	Cullin-1	CUL1_MOUSE	Cul1	64226	55043	60021	47822	54647	49312		59763.3	50593.7							38	38	36	36	37	38
	Q9D4H8	Cullin-2	CUL2_MOUSE	Cul2	39764	38361	35089	27388	30941	29955		37738	29428			coexpression				37	39	37	37	39	39
	Q9JLV5	Cullin-3	CUL3_MOUSE	Cul3	53486	51482	51488	41203	44906	43617		52152	43242							38	40	38	40	39	39
	Q3TCH7	Cullin-4A	CUL4A_MOUSE	Cul4a	4598	3857	3610	3139	3236	3456		4021.67	3277			coexpression				13	11	13	13	13	12
	A2A432	Cullin-4B	CUL4B_MOUSE	Cul4b	33391	27128	27506	22808	24007	23717		29341.7	23510.7							44	47	43	43	43	46
	Q9D5V5	Cullin-5	CUL5_MOUSE	Cul5	20473	18446	18922	16092	16487	15680		19280.3	16086.3							36	37	35	34	34	36
	Q3UY34	Protein CUSTOS	CSTOS_MOUSE	Custos	10515	10278	11878	9277	10482	9690		10890.3	9816.33							6	6	6	6	6	6
	Q9CQ89	Protein CutA	CUTA_MOUSE	Cuta	20251	20754	20178	13502	17685	13263		20394.3	14816.7			Rickettsial homolog, coexpression				2	2	2	2	2	2
	P53564-3	Isoform 3 of Homeobox protein cut-like 1	CUX1_MOUSE	Cux1	1017	928	824	696	804	774		923	758							11	10	10	10	11	11
	Q9JHS9	Spliceosome-associated protein CWC15 homolog	CWC15_MOUSE	Cwc15	33636	33114	35595	23979	32412	28359		34115	28250							8	8	7	7	7	7
	Q8C5N3;Q8C5N3-2	Pre-mRNA-splicing factor CWC22 homolog;Isoform 2 of Pre-mRNA-splicing factor CWC22 homolog	CWC22_MOUSE	Cwc22	13992	12969	12595	10360	11310	10404		13185.3	10691.3			targetP signal				22	22	20	21	20	21
	Q9DBF7	Pre-mRNA-splicing factor CWC25 homolog	CWC25_MOUSE	Cwc25	4257	4420	3993	3614	3901	3622		4223.33	3712.33							5	6	5	6	5	6
	Q3TKY6	Spliceosome-associated protein CWC27 homolog	CWC27_MOUSE	Cwc27	15534	17365	18226	15979	17012	17156		17041.7	16715.7			mito protein domain				10	10	10	10	10	11
	Q8CI33	CWF19-like protein 1	C19L1_MOUSE	Cwf19l1	25330	25213	24189	20010	22087	20997		24910.7	21031.3							19	19	19	19	19	18
	Q8BG79	CWF19-like protein 2	C19L2_MOUSE	Cwf19l2	1538	1567	1546	1362	1607	1267		1550.33	1412							9	9	10	9	10	8
	O88410	C-X-C chemokine receptor type 3	CXCR3_MOUSE	Cxcr3	330	401	564	1024	830	640		431.667	831.333							4	3	4	4	4	4
	P70658;P70658-2	C-X-C chemokine receptor type 4;Isoform CXCR4-A of C-X-C chemokine receptor type 4	CXCR4_MOUSE	Cxcr4	0	52	0	24	85	69		17.3333	59.3333							Filtered	1	Filtered	1	2	2
	Q9EQ16	C-X-C chemokine receptor type 6	CXCR6_MOUSE	Cxcr6	2368	1904	1727	1262	1652	1535		1999.67	1483							3	3	3	3	3	3
	Q9CWW7	CXXC-type zinc finger protein 1	CXXC1_MOUSE	Cxxc1	4565	4585	5096	4523	4772	4675		4748.67	4656.67							14	15	14	14	13	14
	P56395	Cytochrome b5	CYB5_MOUSE	Cyb5a	160776	169358	151476	135226	153467	115778		160537	134824			mito protein domain, coexpression, MS/MS				5	5	5	5	5	5
	Q9CQX2	Cytochrome b5 type B	CYB5B_MOUSE	Cyb5b	157794	177499	187544	118615	153356	122542		174279	131504		MitoCarta3.0	literature, mito protein domain, coexpression, MS/MS++	MOM	Metabolism > Metals and cofactors > Heme-containing proteins | Metabolism > Detoxification > Xenobiotic metabolism | Metabolism > Detoxification > Amidoxime reducing complex | Metabolism > Electron carriers > Cytochromes		7	7	7	7	7	7
	Q9DB73	NADH-cytochrome b5 reductase 1	NB5R1_MOUSE	Cyb5r1	15390	11299	14680	10634	12884	15681		13789.7	13066.3			yeast mito homolog, mito protein domain, MS/MS++				9	9	9	11	11	11
	Q9DCN2;Q9DCN2-2	NADH-cytochrome b5 reductase 3;Isoform 2 of NADH-cytochrome b5 reductase 3	NB5R3_MOUSE	Cyb5r3	93983	86123	86987	66597	80700	79505		89031	75600.7		MitoCarta3.0	literature, mito protein domain, MS/MS+	MOM	Metabolism > Detoxification > Xenobiotic metabolism | Metabolism > Detoxification > Amidoxime reducing complex | Metabolism > Lipid metabolism		18	18	18	18	18	18
	Q3TDX8	Cytochrome b5 reductase 4	NB5R4_MOUSE	Cyb5r4	18951	17141	14301	12945	12290	17888		16797.7	14374.3			mito protein domain				9	9	9	9	9	9
	Q61462	Cytochrome b-245 light chain	CY24A_MOUSE	Cyba	45357	47817	46729	29921	39592	38195		46634.3	35902.7							6	6	6	6	6	6
	Q3TYS2	Cytochrome b-245 chaperone 1	CYBC1_MOUSE	Cybc1	65282	64282	56347	44835	52410	55870		61970.3	51038.3			targetP signal				10	9	9	9	10	10
	Q9D0M3;Q9D0M3-2	Cytochrome c1, heme protein, mitochondrial;Isoform 2 of Cytochrome c1, heme protein, mitochondrial	CY1_MOUSE	Cyc1	87365	87227	88246	69376	73373	77921		87612.7	73556.7		MitoCarta3.0	literature, APEX_IMS, APEX_matrix, targetP signal, yeast mito homolog++, Rickettsial homolog, mito protein domain+, induction, coexpression++, MS/MS++	MIM	OXPHOS > Complex III > CIII subunits | Metabolism > Metals and cofactors > Heme-containing proteins | Metabolism > Electron carriers > Cytochromes | OXPHOS > OXPHOS subunits		12	12	12	11	12	12
	P62897	Cytochrome c, somatic	CYC_MOUSE	Cycs	573436	600814	583588	432705	503358	468411		585946	468158		MitoCarta3.0	literature, APEX_IMS, yeast mito homolog+, Rickettsial homolog, mito protein domain+, MS/MS++	IMS	Metabolism > Metals and cofactors > Heme-containing proteins | Metabolism > Electron carriers > Cytochromes | OXPHOS > OXPHOS subunits | OXPHOS > Cytochrome C | Mitochondrial dynamics and surveillance > Apoptosis		10	9	8	8	8	8
	Q7TMB8	Cytoplasmic FMR1-interacting protein 1	CYFP1_MOUSE	Cyfip1	34723	31438	29180	24885	26814	26733		31780.3	26144			Rickettsial homolog, MS/MS				26	27	27	26	27	26
	Q5SQX6	Cytoplasmic FMR1-interacting protein 2	CYFP2_MOUSE	Cyfip2	65118	54719	53631	45949	48103	47434		57822.7	47162							38	40	35	36	38	39
	Q9QXA1	Cysteine and histidine-rich protein 1	CYHR1_MOUSE	Cyhr1	2877	2135	1302	1500	1338	1452		2104.67	1430			coexpression				3	3	3	3	3	3
	Q80TQ2;Q80TQ2-2	Ubiquitin carboxyl-terminal hydrolase CYLD;Isoform 1 of Ubiquitin carboxyl-terminal hydrolase CYLD	CYLD_MOUSE	Cyld	7669	7693	8094	6555	7096	6801		7818.67	6817.33			mito protein domain				20	22	22	22	20	22
	Q8BKE6	Cytochrome P450 20A1	CP20A_MOUSE	Cyp20a1	131935	129545	116453	75239	101723	100422		125978	92461.3			mito protein domain				15	15	14	14	15	15
	Q9EP75	Leukotriene-B4 omega-hydroxylase 3	CP4FE_MOUSE	Cyp4f14	80613	65079	69701	51981	58618	57602		71797.7	56067			mito protein domain				2	2	2	2	2	2
	Q8K0C4	Lanosterol 14-alpha demethylase	CP51A_MOUSE	Cyp51a1	135648	150534	133933	88783	109633	120363		140038	106260			mito protein domain				23	24	23	22	22	24
	Q8BHZ0	CYFIP-related Rac1 interactor A	CYRIA_MOUSE	Cyria	51525	49998	48860	41933	45654	49729		50127.7	45772							11	11	11	12	12	12
	Q921M7	CYFIP-related Rac1 interactor B	CYRIB_MOUSE	Cyrib	363164	359499	371463	288998	330402	323272		364709	314224							19	19	19	19	19	19
	Q9QX11;Q9QX11-2	Cytohesin-1;Isoform 2 of Cytohesin-1	CYH1_MOUSE	Cyth1	10225	6398	8126	9019	7585	7460		8249.67	8021.33			Rickettsial homolog, mito protein domain, induction				12	10	13	13	12	13
	Q80YW0	Cytohesin-4	CYH4_MOUSE	Cyth4	15638	14561	16346	13773	14797	14560		15515	14376.7			Rickettsial homolog, mito protein domain				11	11	11	11	11	11
	Q91VY6	Cytohesin-interacting protein	CYTIP_MOUSE	Cytip	4430	1909	1918	4450	4194	3379		2752.33	4007.67			mito protein domain				5	5	5	7	7	6
	Q8BHG2;Q8BHG2-3	CXXC motif containing zinc binding protein;Isoform 3 of CXXC motif containing zinc binding protein	CZIB_MOUSE	Czib	47142	44673	46238	34937	38614	38834		46017.7	37461.7			targetP signal				5	6	5	5	6	5
	Q9CX66	Uncharacterized protein C12orf45 homolog	CL045_MOUSE	D10Wsu102e	5917	8801	7129	5737	7058	7096		7282.33	6630.33			coexpression				3	4	4	4	4	4
	Q91YN0	Protein C12orf4 homolog	CL004_MOUSE	D6Wsu163e	1248	1204	1200	910	933	892		1217.33	911.667							4	4	4	4	4	4
	Q8R1F0	Leydig cell tumor 10 kDa protein homolog	L10K_MOUSE	D8Ertd738e	1570	1874	2117	1504	1499	1216		1853.67	1406.33			coexpression				4	4	4	4	4	4
	P61804	Dolichyl-diphosphooligosaccharide--protein glycosyltransferase subunit DAD1	DAD1_MOUSE	Dad1	175629	177774	175680	112725	161753	129214		176361	134564							4	4	4	4	4	4
	Q91WC9	Diacylglycerol lipase-beta	DGLB_MOUSE	Daglb	1390	698	513	419	498	326		867	414.333							2	2	2	2	2	2
	Q6PJN8	DALR anticodon-binding domain-containing protein 3	DALD3_MOUSE	Dalrd3	1294	1156	1102	626	831	1315		1184	924			mito protein domain				4	4	4	3	4	4
	Q91XC8	Death-associated protein 1	DAP1_MOUSE	Dap	27915	41931	21904	18210	26103	21184		30583.3	21832.3							5	5	4	4	4	4
	Q9ER88	28S ribosomal protein S29, mitochondrial	RT29_MOUSE	Dap3	32488	27201	30525	25975	27597	27184		30071.3	26918.7		MitoCarta3.0	literature, APEX_matrix, targetP signal, yeast mito homolog++, mito protein domain+, coexpression, MS/MS++	Matrix	Mitochondrial central dogma > Translation > Mitochondrial ribosome		14	14	14	14	14	14
	Q8VDF3	Death-associated protein kinase 2	DAPK2_MOUSE	Dapk2	14007	13464	11607	10225	12275	12102		13026	11534			mito protein domain				8	9	8	8	9	9
	O54784	Death-associated protein kinase 3	DAPK3_MOUSE	Dapk3	3041	3315	3272	2402	2981	2635		3209.33	2672.67			mito protein domain, coexpression				2	2	2	2	2	2
	Q922B2	Aspartate--tRNA ligase, cytoplasmic	SYDC_MOUSE	Dars1	569415	558824	607039	447543	527047	492494		578426	489028			Rickettsial homolog, mito protein domain, coexpression				37	37	35	36	36	37
	Q8BIP0	Aspartate--tRNA ligase, mitochondrial	SYDM_MOUSE	Dars2	1256	1181	1413	1785	1563	1223		1283.33	1523.67		MitoCarta3.0	APEX_matrix, targetP signal, yeast mito homolog++, Rickettsial homolog, mito protein domain, coexpression, MS/MS	Matrix	Mitochondrial central dogma > Translation > mt-tRNA synthetases		3	4	4	4	4	4
	O35613	Death domain-associated protein 6	DAXX_MOUSE	Daxx	6560	5080	5602	5739	6053	6535		5747.33	6109							5	5	4	5	5	5
	Q9JII5;Q9JII5-2	DAZ-associated protein 1;Isoform 2 of DAZ-associated protein 1	DAZP1_MOUSE	Dazap1	126433	146227	135379	111163	129053	130712		136013	123643			mito protein domain				13	12	12	12	12	12
	P31786	Acyl-CoA-binding protein	ACBP_MOUSE	Dbi	306866	297981	272646	273578	217363	177577		292498	222839		MitoCarta3.0	targetP signal, mito protein domain, induction, coexpression	unknown	Metabolism > Lipid metabolism		9	9	5	5	7	8
	Q62418;Q62418-2;Q62418-3	Drebrin-like protein;Isoform 2 of Drebrin-like protein;Isoform 3 of Drebrin-like protein	DBNL_MOUSE	Dbnl	217662	221632	228362	185446	205634	207351		222552	199477			mito protein domain				23	24	21	21	24	24
	Q923B1	Lariat debranching enzyme	DBR1_MOUSE	Dbr1	11519	12043	13958	11166	12055	10629		12506.7	11283.3							12	12	12	12	12	12
	P53395	Lipoamide acyltransferase component of branched-chain alpha-keto acid dehydrogenase complex, mitochondrial	ODB2_MOUSE	Dbt	29350	27437	26316	17240	21158	22108		27701	20168.7		MitoCarta3.0	literature, APEX_matrix, targetP signal+, yeast mito homolog+, Rickettsial homolog, mito protein domain+, induction, coexpression+, MS/MS++	Matrix	Metabolism > Amino acid metabolism > Branched-chain amino acid metabolism | Metabolism > Amino acid metabolism > Branched-chain amino acid dehydrogenase complex		15	15	15	15	15	15
	Q80TR8;Q80TR8-4	DDB1- and CUL4-associated factor 1;Isoform 4 of DDB1- and CUL4-associated factor 1	DCAF1_MOUSE	Dcaf1	13849	13487	13582	11104	12820	12638		13639.3	12187.3							40	39	39	40	38	41
	Q91VU6;Q91VU6-2	DDB1- and CUL4-associated factor 11;Isoform 2 of DDB1- and CUL4-associated factor 11	DCA11_MOUSE	Dcaf11	449	352	318	209	276	264		373	249.667			targetP signal, mito protein domain, induction, coexpression				2	2	2	2	2	2
	Q6PAC3	DDB1- and CUL4-associated factor 13	DCA13_MOUSE	Dcaf13	38916	39674	38909	30350	34701	32826		39166.3	32625.7			mito protein domain				18	18	17	18	18	18
	Q80T85	DDB1- and CUL4-associated factor 5	DCAF5_MOUSE	Dcaf5	2538	2897	2852	2037	2497	2293		2762.33	2275.67			targetP signal+, mito protein domain				11	12	13	12	13	14
	P61963	DDB1- and CUL4-associated factor 7	DCAF7_MOUSE	Dcaf7	13195	13970	15849	14132	14591	13761		14338	14161.3			mito protein domain				8	8	8	8	8	8
	Q8N7N5	DDB1- and CUL4-associated factor 8	DCAF8_MOUSE	Dcaf8	13617	13501	13104	10733	12662	12703		13407.3	12032.7			mito protein domain				15	15	15	15	15	15
	Q8BHC4	Dephospho-CoA kinase domain-containing protein	DCAKD_MOUSE	Dcakd	12071	10589	8968	7499	8358	8336		10542.7	8064.33		MitoCarta3.0	GFP, yeast mito homolog, Rickettsial homolog, mito protein domain, coexpression, MS/MS	Membrane			8	8	8	8	9	8
	P43346	Deoxycytidine kinase	DCK_MOUSE	Dck	82083	55407	69786	67002	61983	56333		69092	61772.7			mito protein domain				13	13	13	13	13	13
	Q91YD3	mRNA-decapping enzyme 1A	DCP1A_MOUSE	Dcp1a	17339	14191	13016	11128	11584	12157		14848.7	11623			targetP signal				14	14	15	15	14	15
	Q3U564;Q3U564-2	mRNA-decapping enzyme 1B;Isoform 2 of mRNA-decapping enzyme 1B	DCP1B_MOUSE	Dcp1b	597	478	371	302	370	394		482	355.333							3	3	4	2	3	3
	Q9CYC6	m7GpppN-mRNA hydrolase	DCP2_MOUSE	Dcp2	9899	9655	11467	9315	10298	2041		10340.3	7218			mito protein domain				3	3	3	3	3	3
	Q9DAR7	m7GpppX diphosphatase	DCPS_MOUSE	Dcps	265734	230219	220083	188285	211031	213416		238679	204244							24	24	22	22	24	23
	O08788;O08788-2	Dynactin subunit 1;Isoform 2 of Dynactin subunit 1	DCTN1_MOUSE	Dctn1	349461	345939	52093	38016	350565	69094		249164	152558			targetP signal, MS/MS				50	48	46	48	51	50
	Q99KJ8	Dynactin subunit 2	DCTN2_MOUSE	Dctn2	100398	91625	101308	80058	90543	86976		97777	85859							21	20	19	20	18	21
	Q9Z0Y1	Dynactin subunit 3	DCTN3_MOUSE	Dctn3	34858	35963	35176	29933	31157	27631		35332.3	29573.7							7	7	7	7	7	7
	Q8CBY8;Q8CBY8-2	Dynactin subunit 4;Isoform 2 of Dynactin subunit 4	DCTN4_MOUSE	Dctn4	29658	29174	25453	21351	18634	26413		28095	22132.7							13	14	15	14	15	13
	Q9QZB9	Dynactin subunit 5	DCTN5_MOUSE	Dctn5	18688	17460	18355	13975	16668	19354		18167.7	16665.7			Rickettsial homolog, mito protein domain				5	5	5	5	5	5
	Q9WUB4	Dynactin subunit 6	DCTN6_MOUSE	Dctn6	19347	19236	19979	14977	17806	16597		19520.7	16460			Rickettsial homolog, mito protein domain				3	3	3	3	3	3
	Q9QY93	dCTP pyrophosphatase 1	DCTP1_MOUSE	Dctpp1	5421	5469	4792	3947	4101	3082		5227.33	3710							4	3	3	4	4	4
	Q9QZ73	DCN1-like protein 1	DCNL1_MOUSE	Dcun1d1	27404	27022	28045	21696	23467	23383		27490.3	22848.7							12	12	12	12	12	12
	Q8K0V2	DCN1-like protein 3	DCNL3_MOUSE	Dcun1d3	4640	3879	3173	1457	2762	2486		3897.33	2235							6	6	5	4	5	5
	Q9CXV9	DCN1-like protein 5	DCNL5_MOUSE	Dcun1d5	25871	20937	23235	22093	23200	22477		23347.7	22590			coexpression				8	7	7	8	8	8
	Q91X52	L-xylulose reductase	DCXR_MOUSE	Dcxr	5361	4523	4526	2842	3597	53204		4803.33	19881		MitoCarta3.0	APEX_matrix, targetP signal, Rickettsial homolog, mito protein domain	Matrix	Metabolism > Carbohydrate metabolism		5	4	3	4	3	4
	Q9D9Z5	DET1- and DDB1-associated protein 1	DDA1_MOUSE	Dda1	39508	36652	37943	27793	29969	27923		38034.3	28561.7							3	3	3	3	3	3
	Q3U1J4	DNA damage-binding protein 1	DDB1_MOUSE	Ddb1	185663	176330	176639	141856	155681	149486		179544	149008							59	60	57	57	58	58
	Q99J79	DNA damage-binding protein 2	DDB2_MOUSE	Ddb2	8090	7268	7629	8101	8235	7928		7662.33	8088			mito protein domain				12	13	13	12	13	13
	Q80Y98	Phospholipase DDHD2	DDHD2_MOUSE	Ddhd2	1490	1611	1233	887	1078	976		1444.67	980.333			yeast mito homolog, mito protein domain, coexpression				6	6	6	6	6	6
	A2ADY9	Protein DDI1 homolog 2	DDI2_MOUSE	Ddi2	31363	31078	35708	27874	31276	30774		32716.3	29974.7			Rickettsial homolog				12	12	12	12	12	12
	O54734	Dolichyl-diphosphooligosaccharide--protein glycosyltransferase 48 kDa subunit	OST48_MOUSE	Ddost	412869	366072	339056	252477	321395	294008		372666	289293							20	21	21	21	21	20
	Q80WW9	DDRGK domain-containing protein 1	DDRGK_MOUSE	Ddrgk1	13913	14166	12594	9170	11303	12438		13557.7	10970.3			coexpression				8	8	7	7	8	8
	O35215	D-dopachrome decarboxylase	DOPD_MOUSE	Ddt	264814	289850	281401	211995	248813	236835		278688	232548			induction, coexpression, MS/MS				9	9	9	9	9	9
	Q91VR5	ATP-dependent RNA helicase DDX1	DDX1_MOUSE	Ddx1	174178	159320	166032	129163	149563	141298		166510	140008			yeast mito homolog, Rickettsial homolog, mito protein domain, coexpression				47	49	42	43	45	47
	Q80Y44	Probable ATP-dependent RNA helicase DDX10	DDX10_MOUSE	Ddx10	21315	18154	16849	13644	16919	16614		18772.7	15725.7			Rickettsial homolog, mito protein domain				33	31	30	31	32	32
	Q6AXC6	ATP-dependent DNA helicase DDX11	DDX11_MOUSE	Ddx11	476	531	353	270	455	358		453.333	361							4	5	5	4	5	5
	Q501J6	Probable ATP-dependent RNA helicase DDX17	DDX17_MOUSE	Ddx17	674618	645570	632329	491115	611898	549169		650839	550727			yeast mito homolog, Rickettsial homolog, mito protein domain				34	33	32	32	34	32
	Q8K363	ATP-dependent RNA helicase DDX18	DDX18_MOUSE	Ddx18	157181	140411	132696	103019	125449	114584		143429	114351			targetP signal, Rickettsial homolog, mito protein domain				42	43	40	40	43	41
	Q61655	ATP-dependent RNA helicase DDX19A	DD19A_MOUSE	Ddx19a	162120	128437	149279	123576	116518	114593		146612	118229			Rickettsial homolog, mito protein domain				30	30	29	28	28	29
	Q8R3C7	DEAD (Asp-Glu-Ala-Asp) box polypeptide 19b	Q8R3C7_MOUSE	Ddx19b	8821	13644	7887	6743	6545	7709		10117.3	6999							6	6	5	6	6	6
	Q9JJY4	Probable ATP-dependent RNA helicase DDX20	DDX20_MOUSE	Ddx20	21456	21813	19464	15840	18898	18641		20911	17793			Rickettsial homolog, mito protein domain				27	27	27	26	28	28
	Q9JIK5	Nucleolar RNA helicase 2	DDX21_MOUSE	Ddx21	617814	599661	597977	460075	537235	530255		605151	509188			Rickettsial homolog, mito protein domain				64	66	62	62	63	64
	D3Z0M9	DEAD (Asp-Glu-Ala-Asp) box polypeptide 23	D3Z0M9_MOUSE	Ddx23	41217	46897	42223	36586	40906	37823		43445.7	38438.3			Rickettsial homolog, mito protein domain				35	33	33	34	35	34
	Q9ESV0	ATP-dependent RNA helicase DDX24	DDX24_MOUSE	Ddx24	15918	15298	14640	10408	13777	12954		15285.3	12379.7			Rickettsial homolog, mito protein domain				24	25	24	24	25	24
	Q921N6	Probable ATP-dependent RNA helicase DDX27	DDX27_MOUSE	Ddx27	73173	66653	61597	55674	62646	55255		67141	57858.3			Rickettsial homolog, mito protein domain				33	35	33	33	33	33
	Q9CWT6	Probable ATP-dependent RNA helicase DDX28	DDX28_MOUSE	Ddx28	3136	3149	2675	2271	3058	2856		2986.67	2728.33		MitoCarta3.0	literature, APEX_matrix, targetP signal, Rickettsial homolog, mito protein domain	Matrix	Mitochondrial central dogma > mtRNA metabolism > mtRNA granules | Mitochondrial central dogma > Translation > Mitochondrial ribosome assembly		7	7	7	7	7	7
	Q6NZQ2	Probable ATP-dependent RNA helicase DDX31	DDX31_MOUSE	Ddx31	18032	16341	12221	9395	11526	14531		15531.3	11817.3			Rickettsial homolog, mito protein domain, coexpression				17	17	17	17	17	17
	Q8VDW0	ATP-dependent RNA helicase DDX39A	DX39A_MOUSE	Ddx39a	933783	881562	902793	733859	835448	798909		906046	789405			Rickettsial homolog, mito protein domain				28	27	25	24	25	25
	Q9Z1N5	Spliceosome RNA helicase Ddx39b	DX39B_MOUSE	Ddx39b	211242	223886	201910	189992	204873	189059		212346	194641			Rickettsial homolog, mito protein domain				17	17	16	15	16	16
	Q62167	ATP-dependent RNA helicase DDX3X	DDX3X_MOUSE	Ddx3x	718247	668025	701295	505519	608628	584849		695856	566332			Rickettsial homolog, mito protein domain				45	45	44	43	44	43
	Q62095	ATP-dependent RNA helicase DDX3Y	DDX3Y_MOUSE	Ddx3y	12561	14396	14011	9580	11841	12193		13656	11204.7			Rickettsial homolog, mito protein domain, coexpression				11	11	10	10	10	11
	Q91VN6	Probable ATP-dependent RNA helicase DDX41	DDX41_MOUSE	Ddx41	25752	22975	23780	18805	23100	21353		24169	21086			yeast mito homolog, Rickettsial homolog, mito protein domain				27	25	26	27	27	27
	Q810A7	ATP-dependent RNA helicase DDX42	DDX42_MOUSE	Ddx42	67510	68479	70664	59924	67421	64823		68884.3	64056			yeast mito homolog, Rickettsial homolog, mito protein domain				36	38	36	36	37	38
	Q569Z5	Probable ATP-dependent RNA helicase DDX46	DDX46_MOUSE	Ddx46	89745	91751	97946	73280	84611	84189		93147.3	80693.3			yeast mito homolog, Rickettsial homolog, mito protein domain				62	60	55	56	56	60
	Q9CWX9	Probable ATP-dependent RNA helicase DDX47	DDX47_MOUSE	Ddx47	80854	80717	79235	68502	71274	67174		80268.7	68983.3			Rickettsial homolog, mito protein domain				20	20	20	20	20	20
	Q4FZF3	Probable ATP-dependent RNA helicase DDX49	DDX49_MOUSE	Ddx49	22451	18832	17262	13889	16201	14047		19515	14712.3			Rickettsial homolog, mito protein domain				14	14	14	14	13	14
	Q61656	Probable ATP-dependent RNA helicase DDX5	DDX5_MOUSE	Ddx5	814124	808951	821275	655055	723924	708564		814783	695848							39	40	37	37	37	37
	Q99MJ9	ATP-dependent RNA helicase DDX50	DDX50_MOUSE	Ddx50	12347	11917	17849	8928	16668	10267		14037.7	11954.3			Rickettsial homolog, mito protein domain				19	19	19	18	20	20
	Q6P9R1	ATP-dependent RNA helicase DDX51	DDX51_MOUSE	Ddx51	24750	20339	18662	16369	18491	16728		21250.3	17196			Rickettsial homolog, mito protein domain				22	21	19	20	20	20
	Q8K301	Probable ATP-dependent RNA helicase DDX52	DDX52_MOUSE	Ddx52	35637	32297	27390	20824	25373	29170		31774.7	25122.3			Rickettsial homolog, mito protein domain				21	21	21	21	21	21
	Q8K4L0	ATP-dependent RNA helicase DDX54	DDX54_MOUSE	Ddx54	23912	23893	24877	17865	22573	19947		24227.3	20128.3			Rickettsial homolog, mito protein domain				28	28	29	29	29	28
	Q6ZPL9	ATP-dependent RNA helicase DDX55	DDX55_MOUSE	Ddx55	8633	7345	7557	6627	9000	5945		7845	7190.67			Rickettsial homolog, mito protein domain				13	12	13	13	13	12
	Q9D0R4	Probable ATP-dependent RNA helicase DDX56	DDX56_MOUSE	Ddx56	51649	50995	52056	44815	52265	49866		51566.7	48982			Rickettsial homolog, mito protein domain				19	18	17	17	17	19
	Q6Q899	Antiviral innate immune response receptor RIG-I	DDX58_MOUSE	Ddx58	81466	30475	29091	20743	23469	23514		47010.7	22575.3		mito-interacting	mito protein domain				38	38	38	38	38	38
	Q9DBN9	Probable ATP-dependent RNA helicase DDX59	DDX59_MOUSE	Ddx59	295	254	236	196	218	220		261.667	211.333			Rickettsial homolog, mito protein domain				2	3	3	3	3	3
	P54823	Probable ATP-dependent RNA helicase DDX6	DDX6_MOUSE	Ddx6	183721	182817	187959	145658	168033	162260		184832	158650			Rickettsial homolog, mito protein domain				31	30	29	30	29	31
	Q9CQ62	2,4-dienoyl-CoA reductase, mitochondrial	DECR_MOUSE	Decr1	25774	22416	20959	19499	20612	19401		23049.7	19837.3		MitoCarta3.0	literature, APEX_matrix, targetP signal, Rickettsial homolog, mito protein domain, coexpression+, MS/MS++	Matrix	Metabolism > Lipid metabolism > Fatty acid oxidation		11	10	11	11	11	11
	Q9WV68	Peroxisomal 2,4-dienoyl-CoA reductase	DECR2_MOUSE	Decr2	6474	8571	10010	6353	9076	2106		8351.67	5845			Rickettsial homolog, mito protein domain				2	3	3	3	3	3
	Q8C2K1	Differentially expressed in FDCP 6	DEFI6_MOUSE	Def6	41417	41156	44722	37737	41016	38526		42431.7	39093			mito protein domain				33	34	30	31	31	32
	O09005	Sphingolipid delta(4)-desaturase DES1	DEGS1_MOUSE	Degs1	33383	39862	40218	28307	33480	36745		37821	32844			mito protein domain				4	4	4	4	4	4
	Q7TNV0	Protein DEK	DEK_MOUSE	Dek	288548	295261	350136	322160	327298	313240		311315	320899			mito protein domain				24	25	22	22	24	24
	Q9D8N2	DENN domain-containing protein 10	DEN10_MOUSE	Dennd10	11784	11821	10878	8218	10489	10354		11494.3	9687							7	7	7	7	7	7
	Q3UHG7;Q3UHG7-2	DENN domain-containing protein 11;Isoform 2 of DENN domain-containing protein 11	DEN11_MOUSE	Dennd11	5971	6148	5149	2534	3785	3985		5756	3434.67							5	4	5	5	5	4
	Q3U1T9	DENN domain-containing protein 1B	DEN1B_MOUSE	Dennd1b	1567	1489	1658	1329	1385	1248		1571.33	1320.67							4	5	5	4	5	4
	Q8CFK6	DENN domain-containing protein 1C	DEN1C_MOUSE	Dennd1c	5331	2777	3069	2455	5113	2525		3725.67	3364.33							8	9	8	7	7	7
	Q91VV4	DENN domain-containing protein 2D	DEN2D_MOUSE	Dennd2d	19148	18014	17494	11785	14278	15604		18218.7	13889			targetP signal				13	13	12	11	12	13
	A2RT67	DENN domain-containing protein 3	DEND3_MOUSE	Dennd3	334	293	182	113	295	309		269.667	239			mito protein domain				3	3	3	1	2	2
	E9Q8V6	DENN/MADD domain-containing 4A	E9Q8V6_MOUSE	Dennd4a	5977	5279	4942	3918	4475	4638		5399.33	4343.67							32	35	34	34	34	35
	Q3U1Y4	DENN domain-containing protein 4B	DEN4B_MOUSE	Dennd4b	7780	7408	7514	5411	6606	6354		7567.33	6123.67							16	15	15	15	16	15
	A6H8H2-2	Isoform 2 of DENN domain-containing protein 4C	DEN4C_MOUSE	Dennd4c	8067	7411	7079	5029	6182	6373		7519	5861.33							40	39	39	40	41	42
	Q9CQJ6	Density-regulated protein	DENR_MOUSE	Denr	79097	83288	84905	63319	96310	91893		82430	83840.7							10	10	10	9	10	10
	Q8BH88	DEP domain-containing protein 1B	DEP1B_MOUSE	Depdc1b	1620	1187	1199	1122	1054	1233		1335.33	1136.33			mito protein domain				3	3	4	4	4	4
	P61460;P61460-2	GATOR complex protein DEPDC5;Isoform 2 of GATOR complex protein DEPDC5	DEPD5_MOUSE	Depdc5	210	293	493	168	314	490		332	324							3	3	4	4	3	5
	Q91YP3	Deoxyribose-phosphate aldolase	DEOC_MOUSE	Dera	45579	41765	43493	31160	35289	33301		43612.3	33250							13	14	15	15	15	15
	Q99J56	Derlin-1	DERL1_MOUSE	Derl1	35577	37182	28274	19885	26059	26561		33677.7	24168.3							5	5	5	5	5	5
	P0CG14	Decreased expression in renal and prostate cancer protein	DERPC_MOUSE	Derpc	7000	6038	6432	6050	6054	5691		6490	5931.67							8	8	8	8	8	8
	P31001	Desmin	DESM_MOUSE	Des	762	1268	148	166	289	401		726	285.333			targetP signal, induction				2	2	2	2	2	1
	Q9CQT7	Desumoylating isopeptidase 1	DESI1_MOUSE	Desi1	9040	8620	7762	5512	6450	5987		8474	5983			induction				2	2	2	2	2	2
	O54786	DNA fragmentation factor subunit alpha	DFFA_MOUSE	Dffa	9023	7528	6835	6415	7634	7263		7795.33	7104			induction				8	8	7	8	8	7
	O54788	DNA fragmentation factor subunit beta	DFFB_MOUSE	Dffb	945	888	1400	1124	1727	1890		1077.67	1580.33			targetP signal				2	2	2	2	2	2
	Q9Z2A7	Diacylglycerol O-acyltransferase 1	DGAT1_MOUSE	Dgat1	911	813	482	378	795	525		735.333	566			induction				2	2	1	2	2	2
	Q9EQM6	Microprocessor complex subunit DGCR8	DGCR8_MOUSE	Dgcr8	7047	6060	6088	5654	6235	6343		6398.33	6077.33			mito protein domain				12	11	11	11	12	12
	O88673	Diacylglycerol kinase alpha	DGKA_MOUSE	Dgka	30487	33403	25824	20952	23769	22023		29904.7	22248			mito protein domain				29	30	30	30	28	30
	A0A2I3BQ43;A0A2I3BQ48;A0JP53;D3YXJ0	Diacylglycerol kinase	A0A2I3BQ43_MOUSE;A0A2I3BQ48_MOUSE;A0JP53_MOUSE;D3YXJ0_MOUSE	Dgkh	2318	111	2718	59	210	181		1715.67	150							3	1	2	1	2	2
	Q80UP3	Diacylglycerol kinase zeta	DGKZ_MOUSE	Dgkz	5272	5061	5958	5699	6517	5616		5430.33	5944			mito protein domain				15	15	16	16	16	14
	Q8BH86	D-glutamate cyclase, mitochondrial	GLUCM_MOUSE	Dglucy	6707	6327	5223	5478	6456	5942		6085.67	5958.67		MitoCarta3.0	literature, APEX_matrix, targetP signal+, coexpression, MS/MS++	Matrix	Metabolism > Amino acid metabolism		10	11	11	11	11	11
	Q9QX60;Q9QX60-2	Deoxyguanosine kinase, mitochondrial;Isoform 2 of Deoxyguanosine kinase, mitochondrial	DGUOK_MOUSE	Dguok	48121	31663	8856	16851	7401	11976		29546.7	12076		MitoCarta3.0	literature, APEX_matrix, targetP signal, mito protein domain, MS/MS++	Matrix	Metabolism > Nucleotide metabolism > Nucleotide synthesis and processing		4	4	4	4	4	4
	Q8VCH6	Delta(24)-sterol reductase	DHC24_MOUSE	Dhcr24	21348	21221	18108	11444	15341	14824		20225.7	13869.7			yeast mito homolog+, mito protein domain, coexpression				13	13	12	11	11	12
	O88455	7-dehydrocholesterol reductase	DHCR7_MOUSE	Dhcr7	12598	12959	12978	10979	11912	10768		12845	11219.7			coexpression				6	6	6	6	6	6
	P00375	Dihydrofolate reductase	DYR_MOUSE	Dhfr	270503	285365	290026	252334	272689	261122		281965	262048			yeast mito homolog, mito protein domain+				14	13	12	12	12	12
	O35435	Dihydroorotate dehydrogenase (quinone), mitochondrial	PYRD_MOUSE	Dhodh	15703	15949	15518	13358	14737	14305		15723.3	14133.3		MitoCarta3.0	literature, mito protein domain, MS/MS++	MIM	Metabolism > Nucleotide metabolism > Nucleotide synthesis and processing | Metabolism > Electron carriers > Q-linked reactions, other		13	14	13	13	13	13
	Q3TXU5	Deoxyhypusine synthase	DHYS_MOUSE	Dhps	19619	18382	17361	12725	16743	15341		18454	14936.3							12	11	12	12	12	12
	Q99L04	Dehydrogenase/reductase SDR family member 1	DHRS1_MOUSE	Dhrs1	33368	30829	30876	23997	28094	25877		31691	25989.3		MitoCarta3.0	targetP signal, Rickettsial homolog, mito protein domain, MS/MS++	MIM	Metabolism > Lipid metabolism > Cholesterol, bile acid, steroid synthesis		17	16	16	17	17	17
	Q3U0B3	Dehydrogenase/reductase SDR family member 11	DHR11_MOUSE	Dhrs11	6299	3472	3817	2092	2667	1787		4529.33	2182			targetP signal, Rickettsial homolog, mito protein domain, coexpression				3	2	3	2	2	2
	Q5SS80	Dehydrogenase/reductase SDR family member 13	DHR13_MOUSE	Dhrs13	11345	11759	10419	6807	9802	10087		11174.3	8898.67			yeast mito homolog+, Rickettsial homolog, mito protein domain				11	11	11	10	11	11
	Q99LB2	Dehydrogenase/reductase SDR family member 4	DHRS4_MOUSE	Dhrs4	27487	29266	30143	27113	27495	27529		28965.3	27379		MitoCarta3.0	targetP signal+, Rickettsial homolog, mito protein domain, coexpression, MS/MS++	Matrix	Metabolism > Vitamin metabolism > Vitamin A metabolism		9	11	10	10	9	10
	Q9CXR1	Dehydrogenase/reductase SDR family member 7	DHRS7_MOUSE	Dhrs7	14474	11795	10881	11573	12190	10999		12383.3	11587.3			Rickettsial homolog, mito protein domain, coexpression, MS/MS				9	9	9	9	9	9
	Q99J47;Q99J47-2	Dehydrogenase/reductase SDR family member 7B;Isoform 2 of Dehydrogenase/reductase SDR family member 7B	DRS7B_MOUSE	Dhrs7b	24840	19877	26137	19270	22664	21130		23618	21021.3		MitoCarta3.0	Rickettsial homolog, mito protein domain, induction, coexpression	Membrane			11	10	11	11	11	11
	Q8VBZ0	Dehydrogenase/reductase SDR family member on chromosome X homolog	DHRSX_MOUSE	Dhrsx	4136	3769	2784	2362	2767	2905		3563	2678							5	5	5	5	5	5
	O35286	Pre-mRNA-splicing factor ATP-dependent RNA helicase DHX15	DHX15_MOUSE	Dhx15	266410	243780	258778	213454	233563	221457		256323	222825			yeast mito homolog, mito protein domain				40	40	39	39	38	40
	G3X8X0	DEAH (Asp-Glu-Ala-His) box polypeptide 16	G3X8X0_MOUSE	Dhx16	20395	20009	21328	18247	19643	18432		20577.3	18774			mito protein domain				31	32	30	31	32	32
	Q6PGC1	ATP-dependent RNA helicase DHX29	DHX29_MOUSE	Dhx29	23209	20109	18413	11970	15683	16270		20577	14641			targetP signal, yeast mito homolog, mito protein domain				48	50	48	48	47	49
	Q99PU8-2	Isoform 2 of ATP-dependent RNA helicase DHX30	DHX30_MOUSE	Dhx30	19343	17913	17852	14251	16112	15959		18369.3	15440.7		MitoCarta3.0	literature, targetP signal+, yeast mito homolog, mito protein domain	Matrix	Mitochondrial central dogma > mtRNA metabolism > mtRNA granules | Mitochondrial central dogma > Translation > Mitochondrial ribosome assembly		44	44	45	44	45	45
	Q80VY9	ATP-dependent RNA helicase DHX33	DHX33_MOUSE	Dhx33	11648	12320	13913	10767	11420	10541		12627	10909.3			mito protein domain, coexpression				16	17	15	16	16	17
	Q9DBV3	Probable ATP-dependent RNA helicase DHX34	DHX34_MOUSE	Dhx34	504	548	583	515	483	465		545	487.667			mito protein domain				6	7	7	7	7	6
	A2ACQ1;Q8K1G9	DEAH (Asp-Glu-Ala-His) box polypeptide 35	A2ACQ1_MOUSE;Q8K1G9_MOUSE	Dhx35	4042	3893	3874	3306	3649	3480		3936.33	3478.33			mito protein domain				9	10	9	9	9	9
	Q8VHK9	ATP-dependent DNA/RNA helicase DHX36	DHX36_MOUSE	Dhx36	19651	17460	15328	12225	15202	14687		17479.7	14038			yeast mito homolog, mito protein domain, coexpression				27	28	27	27	26	28
	Q6NZL1	DEAH (Asp-Glu-Ala-His) box polypeptide 37	Q6NZL1_MOUSE	Dhx37	10829	10813	10910	9072	9659	9877		10850.7	9536			yeast mito homolog, mito protein domain				24	24	23	24	23	24
	Q80X98	DEAH (Asp-Glu-Ala-His) box polypeptide 38	Q80X98_MOUSE	Dhx38	14188	12517	13103	12013	12693	11762		13269.3	12156			mito protein domain				32	33	32	32	31	34
	Q6PE54	Probable ATP-dependent RNA helicase DHX40	DHX40_MOUSE	Dhx40	785	456	355	362	349	376		532	362.333			targetP signal, mito protein domain				2	2	2	2	2	2
	Q6P5D3;Q6P5D3-2	Putative ATP-dependent RNA helicase DHX57;Isoform 2 of Putative ATP-dependent RNA helicase DHX57	DHX57_MOUSE	Dhx57	2563	1536	1600	1301	1629	1552		1899.67	1494			yeast mito homolog, mito protein domain				7	6	7	7	7	7
	Q99J87	Probable ATP-dependent RNA helicase DHX58	DHX58_MOUSE	Dhx58	1226	1969	1320	1015	1290	1036		1505	1113.67			Rickettsial homolog, mito protein domain				5	7	7	7	7	6
	A2A4P0	ATP-dependent RNA helicase DHX8	DHX8_MOUSE	Dhx8	12521	11280	11432	9505	11442	10146		11744.3	10364.3			Rickettsial homolog, mito protein domain				28	30	30	30	30	29
	O70133	ATP-dependent RNA helicase A	DHX9_MOUSE	Dhx9	225379	236133	221581	195541	206524	210391		227698	204152			yeast mito homolog, mito protein domain				60	59	57	55	56	59
	Q9JIQ3	Diablo homolog, mitochondrial	DBLOH_MOUSE	Diablo	93969	87853	9678	30097	39664	59044		63833.3	42935		MitoCarta3.0	literature, APEX_IMS, targetP signal+, mito protein domain+, MS/MS	IMS	Mitochondrial dynamics and surveillance > Apoptosis		6	6	5	6	6	6
	O08808	Protein diaphanous homolog 1	DIAP1_MOUSE	Diaph1	127319	122088	128855	94372	108418	102369		126087	101720							63	64	61	62	61	63
	O70566	Protein diaphanous homolog 2	DIAP2_MOUSE	Diaph2	998	1298	1360	880	1282	1200		1218.67	1120.67							7	9	8	9	9	9
	Q9Z207	Protein diaphanous homolog 3	DIAP3_MOUSE	Diaph3	3152	2717	2661	2520	2578	2365		2843.33	2487.67							16	17	16	16	16	15
	Q8R418	Endoribonuclease Dicer	DICER_MOUSE	Dicer1	3993	3442	3667	2914	3504	3207		3700.67	3208.33							21	18	20	20	21	20
	Q8C9B9	Death-inducer obliterator 1	DIDO1_MOUSE	Dido1	5226	4659	4770	4172	4442	4014		4885	4209.33							32	30	32	32	32	31
	Q8BTT6	Digestive organ expansion factor homolog	DIEXF_MOUSE	Diexf	13986	12167	11550	9080	10331	9660		12567.7	9690.33							22	23	23	21	24	22
	Q9D0D4	Probable dimethyladenosine transferase	DIM1_MOUSE	Dimt1	68386	64031	63283	49522	60355	58255		65233.3	56044			Rickettsial homolog, mito protein domain				16	16	13	15	15	16
	Q3UH60	Disco-interacting protein 2 homolog B	DIP2B_MOUSE	Dip2b	3353	3405	3639	2887	3138	2967		3465.67	2997.33			mito protein domain				15	16	16	17	17	16
	Q3USZ8	Divergent protein kinase domain 2A	DIK2A_MOUSE	Dipk2a	10366	9684	9922	9239	9760	9811		9990.67	9603.33							12	12	12	12	12	12
	Q9CSH3	Exosome complex exonuclease RRP44	RRP44_MOUSE	Dis3	61120	58901	55094	48598	51981	54012		58371.7	51530.3			yeast mito homolog, mito protein domain				47	47	45	45	46	47
	Q8C0S1	DIS3-like exonuclease 1	DI3L1_MOUSE	Dis3l	3491	2796	2339	2055	2102	2256		2875.33	2137.67			targetP signal, yeast mito homolog				11	12	12	12	12	12
	Q8CI75;Q8CI75-2	DIS3-like exonuclease 2;Isoform 2 of DIS3-like exonuclease 2	DI3L2_MOUSE	Dis3l2	33029	32393	33566	30024	26778	24594		32996	27132			yeast mito homolog				22	23	23	21	24	22
	Q9ESX5	H/ACA ribonucleoprotein complex subunit DKC1	DKC1_MOUSE	Dkc1	154411	138220	159581	131557	146372	140990		150737	139640			Rickettsial homolog, mito protein domain				28	27	27	27	27	26
	Q8BMF4	Dihydrolipoyllysine-residue acetyltransferase component of pyruvate dehydrogenase complex, mitochondrial	ODP2_MOUSE	Dlat	95119	91088	94789	68012	80790	78585		93665.3	75795.7		MitoCarta3.0	literature, APEX_matrix, targetP signal, yeast mito homolog+, Rickettsial homolog, mito protein domain+, induction, coexpression++, MS/MS++	Matrix	Metabolism > Carbohydrate metabolism > Pyruvate metabolism		20	21	20	20	20	20
	O08749	Dihydrolipoyl dehydrogenase, mitochondrial	DLDH_MOUSE	Dld	127895	128765	117380	100966	114250	112640		124680	109285		MitoCarta3.0	literature, APEX_matrix, targetP signal, yeast mito homolog, Rickettsial homolog, mito protein domain, induction, coexpression++, MS/MS++	Matrix	Metabolism > Carbohydrate metabolism > Pyruvate metabolism | Metabolism > Carbohydrate metabolism > TCA cycle | Metabolism > Amino acid metabolism > Branched-chain amino acid metabolism | Metabolism > Amino acid metabolism > Branched-chain amino acid dehydrogenase complex | Metabolism > Amino acid metabolism > Lysine metabolism | Metabolism > Amino acid metabolism > Glycine metabolism | Metabolis…		23	23	20	21	21	23
	Q811D0-2;Q811D0-3	Isoform 2 of Disks large homolog 1;Isoform 3 of Disks large homolog 1	DLG1_MOUSE	Dlg1	18404	16911	18806	14965	17399	13503		18040.3	15289			targetP signal, Rickettsial homolog, mito protein domain				19	19	20	19	20	19
	B1AZP2;B1AZP2-2;B1AZP2-3	Disks large-associated protein 4;Isoform 2 of Disks large-associated protein 4;Isoform 3 of Disks large-associated protein 4	DLGP4_MOUSE	Dlgap4	3679	3061	3293	2079	2873	2480		3344.33	2477.33							9	9	9	9	9	9
	Q8K4R9	Disks large-associated protein 5	DLGP5_MOUSE	Dlgap5	15648	17393	19167	16220	17802	16994		17402.7	17005.3			targetP signal				17	17	16	17	16	17
	Q9D2G2	Dihydrolipoyllysine-residue succinyltransferase component of 2-oxoglutarate dehydrogenase complex, mitochondrial	ODO2_MOUSE	Dlst	74191	75469	80874	72807	77474	73345		76844.7	74542		MitoCarta3.0	literature, APEX_IMS, APEX_matrix, targetP signal, yeast mito homolog+, Rickettsial homolog, mito protein domain+, induction, coexpression++, MS/MS+	Matrix	Metabolism > Carbohydrate metabolism > TCA cycle | Metabolism > Amino acid metabolism > Lysine metabolism		15	17	14	15	16	17
	Q9D7K5	Distal membrane-arm assembly complex protein 2	DMAC2_MOUSE	Dmac2	9500	10141	11834	5833	9938	9800		10491.7	8523.67		MitoCarta3.0	APEX_matrix, GFP, targetP signal, induction, MS/MS	MIM	OXPHOS > Complex I > CI assembly factors | OXPHOS > OXPHOS assembly factors		3	3	3	3	3	3
	Q9JI44	DNA methyltransferase 1-associated protein 1	DMAP1_MOUSE	Dmap1	13269	9481	11956	10317	10362	8762		11568.7	9813.67							10	10	10	10	10	10
	Q6PNC0	DmX-like protein 1	DMXL1_MOUSE	Dmxl1	250	223	185	154	161	166		219.333	160.333			mito protein domain, induction				3	3	3	3	3	3
	Q6ZQJ5	DNA replication ATP-dependent helicase/nuclease DNA2	DNA2_MOUSE	Dna2	7902	10383	7295	5579	7005	6732		8526.67	6438.67		MitoCarta3.0	literature, mito protein domain	Matrix	Mitochondrial central dogma > mtDNA maintenance > mtDNA replication | Metabolism > Metals and cofactors > Fe-S-containing proteins		10	10	11	12	12	11
	B9EJR8	Dynein assembly factor 5, axonemal	DAAF5_MOUSE	Dnaaf5	11838	11151	11034	7794	9526	8566		11341	8628.67							22	23	23	22	23	22
	P63037	DnaJ homolog subfamily A member 1	DNJA1_MOUSE	Dnaja1	290041	216539	221984	178731	202399	181416		242855	187515			Rickettsial homolog, mito protein domain				26	26	22	22	23	23
	Q9QYJ0	DnaJ homolog subfamily A member 2	DNJA2_MOUSE	Dnaja2	232705	229100	231067	175994	205310	205696		230957	195667			Rickettsial homolog, mito protein domain, coexpression				23	23	22	22	22	22
	Q99M87	DnaJ homolog subfamily A member 3, mitochondrial	DNJA3_MOUSE	Dnaja3	23716	24011	23291	19102	21943	21382		23672.7	20809		MitoCarta3.0	literature, APEX_matrix, targetP signal, Rickettsial homolog, mito protein domain, induction, coexpression++, MS/MS+	Matrix	Protein import, sorting and homeostasis > Protein homeostasis > Chaperones		13	13	13	13	13	13
	Q9QYJ3	DnaJ homolog subfamily B member 1	DNJB1_MOUSE	Dnajb1	65475	60397	65201	52406	57715	57651		63691	55924			Rickettsial homolog, mito protein domain				19	20	19	18	20	20
	Q99KV1	DnaJ homolog subfamily B member 11	DJB11_MOUSE	Dnajb11	146177	156540	159838	105209	135954	135322		154185	125495			Rickettsial homolog, mito protein domain, coexpression				16	17	15	15	17	17
	Q9QYI4	DnaJ homolog subfamily B member 12	DJB12_MOUSE	Dnajb12	839	949	1016	821	945	805		934.667	857			Rickettsial homolog, mito protein domain				3	3	4	4	4	4
	Q9D832	DnaJ homolog subfamily B member 4	DNJB4_MOUSE	Dnajb4	7541	8481	9418	6672	9213	7380		8480	7755			Rickettsial homolog, mito protein domain, coexpression				7	7	7	7	7	7
	O54946	DnaJ homolog subfamily B member 6	DNJB6_MOUSE	Dnajb6	42660	44226	46727	34579	40120	38188		44537.7	37629			yeast mito homolog, Rickettsial homolog, mito protein domain				16	16	15	15	16	16
	Q61712	DnaJ homolog subfamily C member 1	DNJC1_MOUSE	Dnajc1	9607	9475	9656	6116	7878	8018		9579.33	7337.33			targetP signal, Rickettsial homolog, mito protein domain				10	10	10	10	10	10
	Q9DC23	DnaJ homolog subfamily C member 10	DJC10_MOUSE	Dnajc10	5321	4328	3574	2395	3209	3071		4407.67	2891.67			Rickettsial homolog, mito protein domain				16	16	16	15	16	16
	Q5U458	DnaJ homolog subfamily C member 11	DJC11_MOUSE	Dnajc11	36392	23765	24562	17580	21482	21019		28239.7	20027		MitoCarta3.0	GFP, yeast mito homolog+, Rickettsial homolog, mito protein domain, coexpression, MS/MS++	MOM	Protein import, sorting and homeostasis > Protein import and sorting | Mitochondrial dynamics and surveillance > Intramitochondrial membrane interactions		19	19	19	19	19	19
	G3X922	DnaJ heat shock protein family (Hsp40) member C13	G3X922_MOUSE	Dnajc13	22028	20166	20030	14937	17117	17051		20741.3	16368.3							71	74	72	71	72	72
	Q78YY6	DnaJ homolog subfamily C member 15	DJC15_MOUSE	Dnajc15	26426	25901	29725	17190	23489	24866		27350.7	21848.3		MitoCarta3.0	GFP, yeast mito homolog, mito protein domain, induction, coexpression, MS/MS+	MIM	Protein import, sorting and homeostasis > Protein import and sorting > Import motor		4	4	4	4	4	4
	Q91WT4	DnaJ homolog subfamily C member 17	DJC17_MOUSE	Dnajc17	15667	12632	10894	9448	10850	10427		13064.3	10241.7			Rickettsial homolog, mito protein domain				7	7	7	7	7	7
	Q9CQV7;Q9CQV7-2;Q9CQV7-3	Mitochondrial import inner membrane translocase subunit TIM14;Isoform 2 of Mitochondrial import inner membrane translocase subunit TIM14;Isoform 3 of Mitochondrial import inner membrane translocase subunit TIM14	TIM14_MOUSE	Dnajc19	12464	15127	14697	13861	14353	13661		14096	13958.3		MitoCarta3.0	literature, APEX_matrix, targetP signal, yeast mito homolog, mito protein domain, MS/MS++	MIM	Protein import, sorting and homeostasis > Protein import and sorting > Import motor		3	4	4	4	4	4
	P54103	DnaJ homolog subfamily C member 2	DNJC2_MOUSE	Dnajc2	70424	69679	70553	57611	66723	62693		70218.7	62342.3			yeast mito homolog, Rickettsial homolog, mito protein domain				29	31	27	26	26	29
	E9Q8D0	DnaJ homolog subfamily C member 21	DJC21_MOUSE	Dnajc21	5228	5554	5466	3884	4836	4585		5416	4435			yeast mito homolog, Rickettsial homolog, mito protein domain, coexpression				9	9	9	9	9	9
	Q91ZF0	DnaJ homolog subfamily C member 24	DJC24_MOUSE	Dnajc24	8131	8877	8582	6352	8028	6035		8530	6805			Rickettsial homolog, mito protein domain				3	3	3	3	3	3
	Q91YW3	DnaJ homolog subfamily C member 3	DNJC3_MOUSE	Dnajc3	62886	66212	68487	49454	57930	61433		65861.7	56272.3			yeast mito homolog+, Rickettsial homolog, mito protein domain				29	27	26	27	27	28
	P60904	DnaJ homolog subfamily C member 5	DNJC5_MOUSE	Dnajc5	12497	14070	10936	8145	10196	10259		12501	9533.33			Rickettsial homolog, mito protein domain				6	6	6	6	6	6
	Q9QYI3	DnaJ homolog subfamily C member 7	DNJC7_MOUSE	Dnajc7	118477	124800	126187	99883	114951	107825		123155	107553			Rickettsial homolog, mito protein domain				36	39	35	36	36	37
	Q6NZB0	DnaJ homolog subfamily C member 8	DNJC8_MOUSE	Dnajc8	149771	157492	143277	129933	140929	138276		150180	136379			Rickettsial homolog, mito protein domain				13	14	14	14	14	13
	Q91WN1	DnaJ homolog subfamily C member 9	DNJC9_MOUSE	Dnajc9	162738	154286	186674	176048	174338	165598		167899	171995			yeast mito homolog, Rickettsial homolog, mito protein domain				20	20	19	20	20	20
	Q8K1M6-2	Isoform 2 of Dynamin-1-like protein	DNM1L_MOUSE	Dnm1l	102018	86602	72744	55015	62380	60868		87121.3	59421		MitoCarta3.0	literature, yeast mito homolog+, mito protein domain, induction	MOM	Mitochondrial dynamics and surveillance > Fission		40	41	40	40	42	41
	Q8K1M6-3	Isoform 3 of Dynamin-1-like protein	DNM1L_MOUSE	Dnm1l	2352	2177	1584	1652	1946	2026		2037.67	1874.67		MitoCarta3.0	literature, yeast mito homolog+, mito protein domain, induction	MOM	Mitochondrial dynamics and surveillance > Fission		2	2	2	2	2	2
	P39054	Dynamin-2	DYN2_MOUSE	Dnm2	125687	129959	110066	89010	104120	105420		121904	99516.7			yeast mito homolog+, mito protein domain				50	51	42	44	47	50
	Q8BZ98;Q8BZ98-2	Dynamin-3;Isoform 2 of Dynamin-3	DYN3_MOUSE	Dnm3	388	439	278	183	214	253		368.333	216.667			yeast mito homolog+, mito protein domain				2	2	1	1	1	2
	P13864	DNA (cytosine-5)-methyltransferase 1	DNMT1_MOUSE	Dnmt1	168498	163042	172477	165120	167865	158550		168006	163845			targetP signal, mito protein domain				97	100	93	94	94	98
	O88508	DNA (cytosine-5)-methyltransferase 3A	DNM3A_MOUSE	Dnmt3a	6202	6761	7434	6593	6745	6275		6799	6537.67							20	21	22	22	22	22
	O88509;O88509-2;O88509-3;O88509-4	DNA (cytosine-5)-methyltransferase 3B;Isoform 2 of DNA (cytosine-5)-methyltransferase 3B;Isoform 3 of DNA (cytosine-5)-methyltransferase 3B;Isoform 4 of DNA (cytosine-5)-methyltransferase 3B	DNM3B_MOUSE	Dnmt3b	171	214	278	281	277	228		221	262							2	2	2	2	2	2
	Q9Z2W0	Aspartyl aminopeptidase	DNPEP_MOUSE	Dnpep	41238	42280	42338	30258	37384	36622		41952	34754.7			targetP signal				13	13	12	14	13	14
	Q80VJ3	2'-deoxynucleoside 5'-phosphate N-hydrolase 1	DNPH1_MOUSE	Dnph1	27892	27097	24255	27731	27232	25786		26414.7	26916.3							8	8	8	8	8	8
	Q99LB0	Deoxynucleotidyltransferase terminal-interacting protein 1	TDIF1_MOUSE	Dnttip1	6100	4133	2547	3434	2686	4071		4260	3397							5	5	5	5	5	5
	Q8R2M2	Deoxynucleotidyltransferase terminal-interacting protein 2	TDIF2_MOUSE	Dnttip2	26677	26168	28327	23512	24837	23909		27057.3	24086			targetP signal				27	27	25	25	26	27
	Q8BZN6-4	Isoform 4 of Dedicator of cytokinesis protein 10	DOC10_MOUSE	Dock10	417	319	315	242	269	166		350.333	225.667			targetP signal+, yeast mito homolog, mito protein domain				2	2	2	2	2	2
	Q8BZN6;Q8BZN6-2;Q8BZN6-3	Dedicator of cytokinesis protein 10;Isoform 2 of Dedicator of cytokinesis protein 10;Isoform 3 of Dedicator of cytokinesis protein 10	DOC10_MOUSE	Dock10	41014	38876	38953	33435	35732	36228		39614.3	35131.7			targetP signal+, yeast mito homolog, mito protein domain				85	88	79	77	82	82
	A2AF47	Dedicator of cytokinesis protein 11	DOC11_MOUSE	Dock11	19324	24334	16921	16356	22512	16501		20193	18456.3			yeast mito homolog, mito protein domain				75	74	71	73	74	73
	Q8C3J5	Dedicator of cytokinesis protein 2	DOCK2_MOUSE	Dock2	103669	95432	94129	80383	84932	83882		97743.3	83065.7			yeast mito homolog, mito protein domain				97	98	95	99	95	98
	B2RY04	Dedicator of cytokinesis protein 5	DOCK5_MOUSE	Dock5	1990	1542	1316	894	1183	1035		1616	1037.33			yeast mito homolog, mito protein domain				15	15	15	15	15	14
	Q8C147	Dedicator of cytokinesis protein 8	DOCK8_MOUSE	Dock8	66037	62733	63293	46543	55372	53007		64021	51640.7			targetP signal, yeast mito homolog				88	87	86	87	87	87
	Q8BIK4;Q8BIK4-2	Dedicator of cytokinesis protein 9;Isoform 2 of Dedicator of cytokinesis protein 9	DOCK9_MOUSE	Dock9	2484	2276	2207	1820	2150	1958		2322.33	1976							9	8	9	7	9	9
	Q99LN9	Deoxyhypusine hydroxylase	DOHH_MOUSE	Dohh	27950	29320	29877	19959	26380	20834		29049	22391			coexpression				11	11	11	11	11	11
	P97465	Docking protein 1	DOK1_MOUSE	Dok1	9806	6240	8461	10707	10598	7346		8169	9550.33							9	9	9	10	10	10
	O70469	Docking protein 2	DOK2_MOUSE	Dok2	83797	88855	96876	56604	82342	82914		89842.7	73953.3							15	15	15	15	15	15
	Q9JMF7	Dolichyldiphosphatase 1	DOPP1_MOUSE	Dolpp1	3267	4220	2508	2124	1882	2279		3331.67	2095							3	4	4	4	3	3
	Q9QXP4	Protein downstream neighbor of Son	DONS_MOUSE	Donson	3347	3056	2764	2346	2725	2877		3055.67	2649.33			targetP signal				7	7	6	7	7	7
	Q8BL99;Q8BL99-5;Q8BL99-6	Protein dopey-1;Isoform 5 of Protein dopey-1;Isoform 6 of Protein dopey-1	DOP1_MOUSE	Dop1a	184	107	18	33	58	46		103	45.6667							3	3	1	2	3	3
	Q3UHQ6;Q3UHQ6-2	Protein dopey-2;Isoform 2 of Protein dopey-2	DOP2_MOUSE	Dop1b	477	298	315	223	286	316		363.333	275			yeast mito homolog				8	7	7	7	8	8
	P42867	UDP-N-acetylglucosamine--dolichyl-phosphate N-acetylglucosaminephosphotransferase	GPT_MOUSE	Dpagt1	1543	1341	917	827	869	899		1267	865			Rickettsial homolog				2	2	2	2	2	2
	Q8BPA8	Protein DPCD	DPCD_MOUSE	Dpcd	3597	3915	3149	2680	2813	2371		3553.67	2621.33							2	2	2	2	2	2
	Q61103	Zinc finger protein ubi-d4	REQU_MOUSE	Dpf2	36818	49328	39306	36310	37047	59989		41817.3	44448.7							18	19	19	19	19	19
	Q5NCQ5	2-(3-amino-3-carboxypropyl)histidine synthase subunit 1	DPH1_MOUSE	Dph1	4987	4594	4153	3312	3800	3730		4578	3614							6	6	6	6	6	6
	Q9CR25	2-(3-amino-3-carboxypropyl)histidine synthase subunit 2	DPH2_MOUSE	Dph2	6127	5748	6981	5242	5819	5141		6285.33	5400.67			coexpression				6	6	6	6	6	6
	Q9CWQ0	Diphthine methyl ester synthase	DPH5_MOUSE	Dph5	29351	24396	21520	19744	19267	19901		25089	19637.3			Rickettsial homolog, coexpression				12	12	12	12	11	12
	Q9CQ28	Diphthine--ammonia ligase	DPH6_MOUSE	Dph6	8898	8296	6262	4459	5625	5839		7818.67	5307.67							5	5	5	5	5	5
	Q9CYU6	Diphthine methyltransferase	DPH7_MOUSE	Dph7	3266	3309	3741	3196	3513	3028		3438.67	3245.67			mito protein domain				5	5	5	5	5	5
	O70152	Dolichol-phosphate mannosyltransferase subunit 1	DPM1_MOUSE	Dpm1	58764	53151	55711	47980	49900	48544		55875.3	48808			targetP signal, yeast mito homolog, Rickettsial homolog				15	15	14	14	15	15
	Q9D1Q4	Dolichol-phosphate mannosyltransferase subunit 3	DPM3_MOUSE	Dpm3	6028	6140	8695	6828	8431	6009		6954.33	7089.33							2	2	2	2	2	2
	Q99KK7	Dipeptidyl peptidase 3	DPP3_MOUSE	Dpp3	121453	125431	123388	88600	106305	109455		123424	101453							39	39	35	37	37	39
	P28843	Dipeptidyl peptidase 4	DPP4_MOUSE	Dpp4	17809	16688	20077	19347	17623	16242		18191.3	17737.3			MS/MS				26	26	24	25	25	25
	Q9ET22	Dipeptidyl peptidase 2	DPP2_MOUSE	Dpp7	870	443	810	896	877	835		707.667	869.333			mito protein domain				4	3	4	4	4	4
	Q80YA7	Dipeptidyl peptidase 8	DPP8_MOUSE	Dpp8	5424	3873	4666	3088	3619	3117		4654.33	3274.67							6	7	7	7	7	7
	Q8BVG4	Dipeptidyl peptidase 9	DPP9_MOUSE	Dpp9	20731	19372	16843	13862	16783	17342		18982	15995.7			coexpression				27	27	25	26	26	27
	A6X919	Probable C-mannosyltransferase DPY19L1	D19L1_MOUSE	Dpy19l1	10537	12272	12309	11062	9630	9330		11706	10007.3			targetP signal				15	16	15	16	15	16
	Q99LT0	Protein dpy-30 homolog	DPY30_MOUSE	Dpy30	27206	19947	9227	7960	9705	6072		18793.3	7912.33			induction				5	4	3	4	4	4
	O08553	Dihydropyrimidinase-related protein 2	DPYL2_MOUSE	Dpysl2	372697	390754	379345	347547	370736	375945		380932	364743							31	31	28	28	29	31
	Q91WV0	Protein Dr1	NC2B_MOUSE	Dr1	38503	39469	48606	36818	40609	35770		42192.7	37732.3							7	7	6	5	6	6
	Q9D6N5	Dr1-associated corepressor	NC2A_MOUSE	Drap1	50464	37797	37534	29836	34244	33327		41931.7	32469							7	7	7	7	7	7
	P32233	Developmentally-regulated GTP-binding protein 1	DRG1_MOUSE	Drg1	154699	136358	141320	114145	122225	118996		144126	118455			Rickettsial homolog, mito protein domain				25	25	25	25	25	25
	Q9QXB9	Developmentally-regulated GTP-binding protein 2	DRG2_MOUSE	Drg2	140235	115118	118023	91076	108101	103885		124459	101021			Rickettsial homolog, mito protein domain, induction				20	20	19	19	19	19
	Q5HZJ0	Ribonuclease 3	RNC_MOUSE	Drosha	3618	3528	3630	3043	3615	3499		3592	3385.67			Rickettsial homolog, mito protein domain				9	9	8	9	9	9
	Q14AI0	Sister chromatid cohesion protein DCC1	DCC1_MOUSE	DSCC1	12583	11394	10813	9946	11830	10439		11596.7	10738.3							11	11	11	11	11	11
	Q61495;Q7TSF1	Desmoglein-1-alpha;Desmoglein-1-beta	DSG1A_MOUSE;DSG1B_MOUSE	Dsg1a;Dsg1b	1022	1032	413	450	457	0		822.333	302.333							2	3	2	2	2	Filtered
	Q9CYC5	Kinetochore-associated protein DSN1 homolog	DSN1_MOUSE	Dsn1	6076	5107	5746	5991	4874	4007		5643	4957.33			induction				7	6	6	7	7	6
	E9Q557	Desmoplakin	DESP_MOUSE	Dsp	8279	6232	1584	2074	1081	1244		5365	1466.33			mito protein domain				44	41	24	32	19	20
	Q91ZU6;Q91ZU6-2;Q91ZU6-3;Q91ZU6-4	Dystonin;Isoform 1 of Dystonin;Isoform 3 of Dystonin;Isoform 4 of Dystonin	DYST_MOUSE	Dst	191	168	185	100	151	121		181.333	124			mito protein domain				2	2	2	2	2	2
	Q9R0P5	Destrin	DEST_MOUSE	Dstn	86155	87330	95105	78794	67812	59268		89530	68624.7							10	10	10	10	9	9
	Q9DD18	D-aminoacyl-tRNA deacylase 1	DTD1_MOUSE	Dtd1	11243	11471	10199	9286	9801	9303		10971	9463.33			MS/MS				4	4	4	4	4	4
	Q8BHA3;Q8BHA3-2	D-aminoacyl-tRNA deacylase 2;Isoform 2 of D-aminoacyl-tRNA deacylase 2	DTD2_MOUSE	Dtd2	15607	13809	10495	7708	9305	10308		13303.7	9107			targetP signal				4	4	4	3	3	4
	Q3TLR7;Q3TLR7-2	Denticleless protein homolog;Isoform 2 of Denticleless protein homolog	DTL_MOUSE	Dtl	673	782	859	782	845	774		771.333	800.333			targetP signal, mito protein domain				4	4	4	4	4	4
	O70585	Dystrobrevin beta	DTNB_MOUSE	Dtnb	238	103	160	168	201	138		167	169							2	1	1	2	2	1
	Q3UIR3	E3 ubiquitin-protein ligase DTX3L	DTX3L_MOUSE	Dtx3l	18576	19504	19106	13608	16808	15589		19062	15335			mito protein domain				25	25	24	24	25	24
	P97930	Thymidylate kinase	KTHY_MOUSE	Dtymk	83687	78245	75214	72113	73900	67685		79048.7	71232.7			Rickettsial homolog, MS/MS+				14	14	14	14	14	14
	Q8C2P3	tRNA-dihydrouridine(16/17) synthase [NAD(P)(+)]-like	DUS1L_MOUSE	Dus1l	948	1143	1062	1230	1503	1594		1051	1442.33			Rickettsial homolog, mito protein domain, coexpression				3	4	3	4	4	4
	Q9D7B1	tRNA-dihydrouridine(20) synthase [NAD(P)+]-like	DUS2L_MOUSE	Dus2	5027	5185	4725	2766	4496	4108		4979	3790		MitoCarta3.0	GFP, Rickettsial homolog, mito protein domain	Matrix	Mitochondrial central dogma > mtRNA metabolism > mt-tRNA modifications		8	9	9	9	9	9
	Q91XI1	tRNA-dihydrouridine(47) synthase [NAD(P)(+)]-like	DUS3L_MOUSE	Dus3l	14196	15799	14132	12365	13619	13373		14709	13119			Rickettsial homolog, mito protein domain				15	15	15	15	15	15
	Q6NXK5	RNA/RNP complex-1-interacting phosphatase	DUS11_MOUSE	Dusp11	2980	3061	3256	2595	2765	2567		3099	2642.33			mito protein domain				3	3	3	3	3	3
	Q9D0T2	Dual specificity protein phosphatase 12	DUS12_MOUSE	Dusp12	4897	4372	4406	3108	3736	3448		4558.33	3430.67			mito protein domain				3	3	3	3	3	3
	Q9D7X3	Dual specificity protein phosphatase 3	DUS3_MOUSE	Dusp3	9706	9076	8068	4045	7006	6497		8950	5849.33			mito protein domain, MS/MS				4	4	4	4	4	4
	Q1HL35	Dual specificity protein phosphatase	Q1HL35_MOUSE	Dusp5	2126	1342	1441	783	1062	970		1636.33	938.333			mito protein domain				2	2	2	2	2	2
	Q9DBB1	Dual specificity protein phosphatase 6	DUS6_MOUSE	Dusp6	2384	4043	2600	2180	2237	2473		3009	2296.67			mito protein domain, induction				2	2	2	2	2	2
	Q9CQ43	Deoxyuridine 5'-triphosphate nucleotidohydrolase	Q9CQ43_MOUSE	Dut	1374385	1439340	1556272	1227092	1372341	1343453		1.45667e+06	1.3143e+06							10	14	11	11	13	11
	Q60838	Segment polarity protein dishevelled homolog DVL-2	DVL2_MOUSE	Dvl2	16723	15149	16462	13157	14080	14157		16111.3	13798			mito protein domain				9	9	9	9	8	9
	O70348	Decapping and exoribonuclease protein	DXO_MOUSE	Dxo	886	818	625	471	662	607		776.333	580			induction				2	2	2	2	2	2
	Q8CHY3	Dymeclin	DYM_MOUSE	Dym	2516	2135	1562	1220	1671	1803		2071	1564.67							5	5	3	4	4	5
	Q9JHU4	Cytoplasmic dynein 1 heavy chain 1	DYHC1_MOUSE	Dync1h1	80082	70160	65964	59612	60310	57501		72068.7	59141			mito protein domain				230	227	221	222	223	223
	O88487	Cytoplasmic dynein 1 intermediate chain 2	DC1I2_MOUSE	Dync1i2	37091	44198	40849	33733	38377	35938		40712.7	36016			mito protein domain				19	19	18	19	19	20
	Q8R1Q8	Cytoplasmic dynein 1 light intermediate chain 1	DC1L1_MOUSE	Dync1li1	130072	123526	119124	80187	101569	92123		124241	91293			targetP signal				25	26	24	25	25	25
	Q6PDL0	Cytoplasmic dynein 1 light intermediate chain 2	DC1L2_MOUSE	Dync1li2	11677	11110	11814	8734	9861	9306		11533.7	9300.33							12	12	11	11	11	12
	P63168	Dynein light chain 1, cytoplasmic	DYL1_MOUSE	Dynll1	176314	244488	182900	130654	143833	149973		201234	141487			mito protein domain				5	6	4	5	5	5
	Q9D0M5	Dynein light chain 2, cytoplasmic	DYL2_MOUSE	Dynll2	68781	81931	78452	63074	74613	67167		76388	68284.7			mito protein domain, induction				4	4	2	2	3	2
	P62627	Dynein light chain roadblock-type 1	DLRB1_MOUSE	Dynlrb1	95574	101584	99532	74219	87923	83327		98896.7	81823			coexpression, MS/MS				4	4	4	4	4	4
	P51807	Dynein light chain Tctex-type 1	DYLT1_MOUSE	Dynlt1	62183	47480	45622	34850	42110	41533		51761.7	39497.7							5	5	5	5	5	5
	Q61214	Dual specificity tyrosine-phosphorylation-regulated kinase 1A	DYR1A_MOUSE	Dyrk1a	1401	1342	1715	1692	1860	1908		1486	1820			mito protein domain				7	6	7	7	7	8
	O35261	Transcription factor E2F3	E2F3_MOUSE	E2f3	1454	1279	1223	1201	1250	1113		1318.67	1188							3	3	3	3	3	3
	Q8R0K9	Transcription factor E2F4	E2F4_MOUSE	E2f4	29502	26367	30103	20973	25398	23982		28657.3	23451			coexpression				13	12	11	11	12	12
	Q58FA4	Transcription factor E2F8	E2F8_MOUSE	E2f8	82	122	112	109	112	99		105.333	106.667							1	2	2	2	2	2
	Q9D4C5	ELL-associated factor 1	EAF1_MOUSE	Eaf1	4513	4422	5194	4046	4421	3791		4709.67	4086							4	4	4	4	4	4
	Q9CXJ1	Probable glutamate--tRNA ligase, mitochondrial	SYEM_MOUSE	Ears2	1175	579	349	230	324	302		701	285.333		MitoCarta3.0	literature, APEX_matrix, GFP, yeast mito homolog++, Rickettsial homolog, mito protein domain, coexpression	Matrix	Mitochondrial central dogma > Translation > mt-tRNA synthetases		4	4	3	3	4	2
	Q9D0V7	Receptor-binding cancer antigen expressed on SiSo cells	RCAS1_MOUSE	Ebag9	2868	2173	3350	1109	2793	2324		2797	2075.33							2	2	2	1	2	2
	Q9D903	Probable rRNA-processing protein EBP2	EBP2_MOUSE	Ebna1bp2	93095	87937	89605	68155	81418	78105		90212.3	75892.7							19	19	19	19	19	19
	P70245	3-beta-hydroxysteroid-Delta(8),Delta(7)-isomerase	EBP_MOUSE	Ebp	58153	64424	69960	54402	64552	63023		64179	60659							3	3	3	3	3	3
	Q9CS74	Protein ecdysoneless homolog	ECD_MOUSE	Ecd	7001	7237	6218	4941	5753	5218		6818.67	5304			coexpression				11	11	11	11	11	11
	O35459	Delta(3,5)-Delta(2,4)-dienoyl-CoA isomerase, mitochondrial	ECH1_MOUSE	Ech1	23541	22911	20470	14866	17542	17911		22307.3	16773		MitoCarta3.0	APEX_matrix, targetP signal, yeast mito homolog+, mito protein domain, coexpression+, MS/MS++	Matrix	Metabolism > Lipid metabolism		15	15	14	15	15	15
	Q9D9V3;Q9D9V3-2	Ethylmalonyl-CoA decarboxylase;Isoform 2 of Ethylmalonyl-CoA decarboxylase	ECHD1_MOUSE	Echdc1	11984	11831	9999	8481	9959	9742		11271.3	9394		MitoCarta3.0	yeast mito homolog+, Rickettsial homolog, mito protein domain, coexpression, MS/MS+	unknown	Metabolism > Lipid metabolism		4	5	5	5	5	5
	Q8BH95	Enoyl-CoA hydratase, mitochondrial	ECHM_MOUSE	Echs1	37767	39554	39897	32286	38081	36645		39072.7	35670.7		MitoCarta3.0	literature, APEX_matrix, targetP signal+, yeast mito homolog+, Rickettsial homolog, mito protein domain, induction, coexpression+, MS/MS++	Matrix	Metabolism > Lipid metabolism > Fatty acid oxidation | Metabolism > Amino acid metabolism > Branched-chain amino acid metabolism | Metabolism > Amino acid metabolism > Lysine metabolism		12	12	12	12	12	12
	P42125	Enoyl-CoA delta isomerase 1, mitochondrial	ECI1_MOUSE	Eci1	79949	73099	70482	55105	63776	65290		74510	61390.3		MitoCarta3.0	literature, APEX_matrix, targetP signal+, mito protein domain, coexpression+, MS/MS++	Matrix	Metabolism > Lipid metabolism > Fatty acid oxidation		11	11	11	11	11	11
	Q9WUR2;Q9WUR2-2	Enoyl-CoA delta isomerase 2;Isoform 2 of Enoyl-CoA delta isomerase 2	ECI2_MOUSE	Eci2	7212	9793	8513	6293	5717	6666		8506	6225.33		MitoCarta3.0	literature, APEX_matrix, targetP signal, mito protein domain, coexpression+, MS/MS++	Matrix	Metabolism > Lipid metabolism > Fatty acid oxidation		7	8	8	8	6	8
	Q6PDI5	Proteasome adapter and scaffold protein ECM29	ECM29_MOUSE	Ecpas	57077	54108	52558	41089	46545	45315		54581	44316.3							83	82	79	80	80	82
	Q9QZH6	Evolutionarily conserved signaling intermediate in Toll pathway, mitochondrial	ECSIT_MOUSE	Ecsit	5841	5234	4640	5193	5369	6039		5238.33	5533.67		MitoCarta3.0	literature, APEX_matrix, targetP signal, mito protein domain, induction, coexpression+	MIM	OXPHOS > Complex I > CI assembly factors | OXPHOS > OXPHOS assembly factors		7	9	9	9	9	9
	Q07139;Q07139-2	Protein ECT2;Isoform 2 of Protein ECT2	ECT2_MOUSE	Ect2	2208	1949	1558	1448	1610	1628		1905	1562			mito protein domain				11	11	11	11	11	11
	Q8VHX2	Ectodysplasin-A receptor-associated adapter protein	EDAD_MOUSE	Edaradd	6042	5792	6916	6167	6928	6040		6250	6378.33							2	2	2	2	2	2
	Q8K2D3	Enhancer of mRNA-decapping protein 3	EDC3_MOUSE	Edc3	22922	21290	18636	16180	18417	17972		20949.3	17523			mito protein domain				18	18	17	18	16	18
	Q3UJB9	Enhancer of mRNA-decapping protein 4	EDC4_MOUSE	Edc4	35236	30650	30237	25566	27254	26104		32041	26308							42	43	39	41	41	40
	Q925U4	ER degradation-enhancing alpha-mannosidase-like protein 1	EDEM1_MOUSE	Edem1	410	726	787	508	587	672		641	589							1	2	2	2	2	2
	Q8BJT9	ER degradation-enhancing alpha-mannosidase-like protein 2	EDEM2_MOUSE	Edem2	417	425	390	257	342	322		410.667	307							2	2	2	2	2	2
	Q2HXL6	ER degradation-enhancing alpha-mannosidase-like protein 3	EDEM3_MOUSE	Edem3	509	415	346	260	396	335		423.333	330.333							3	3	3	3	3	3
	Q9JMG1	Endothelial differentiation-related factor 1	EDF1_MOUSE	Edf1	157765	166984	171962	137024	153319	157254		165570	149199			yeast mito homolog, Rickettsial homolog, coexpression				9	10	10	9	9	10
	Q6GQV7	Erythroid differentiation-related factor 1	EDRF1_MOUSE	Edrf1	599	396	368	246	262	265		454.333	257.667							4	4	4	4	4	4
	Q8BL66	Early endosome antigen 1	EEA1_MOUSE	Eea1	12015	7813	10874	5013	11963	9032		10234	8669.33							34	32	34	33	35	35
	Q921E6-2	Isoform 2 of Polycomb protein EED	EED_MOUSE	Eed	45181	44779	48527	43411	44311	40625		46162.3	42782.3			mito protein domain				21	22	22	21	21	22
	P10126	Elongation factor 1-alpha 1	EF1A1_MOUSE	Eef1a1	17236032	15096634	14524509	9757693	12503924	12633745		1.56191e+07	1.16318e+07			yeast mito homolog, Rickettsial homolog, mito protein domain				42	42	41	41	41	40
	Q9CY45	EEF1A lysine methyltransferase 1	EFMT1_MOUSE	Eef1akmt1	13451	12385	13374	9044	11014	9102		13070	9720			coexpression				4	4	4	4	4	4
	Q9D853	EEF1A lysine methyltransferase 2	EFMT2_MOUSE	Eef1akmt2	7859	7717	6913	6004	7099	6283		7496.33	6462			mito protein domain+				5	5	5	5	5	5
	P0DPD9;P0DPD9-2;P0DPE0	EEF1AKMT4-ECE2 readthrough transcript protein;Isoform Eef1akmt4-Ece2-2 of EEF1AKMT4-ECE2 readthrough transcript protein;EEF1A lysine methyltransferase 4	EFCE2_MOUSE;EFCE2_MOUSE;EFMT4_MOUSE	Eef1akmt4-Ece2;Eef1akmt4-Ece2;Eef1akmt4	3258	3685	3481	2466	2605	2896		3474.67	2655.67							4	4	4	4	4	4
	Q91YR5	eEF1A lysine and N-terminal methyltransferase	EFNMT_MOUSE	EEF1AKNMT	9881	8689	6400	5873	6380	6251		8323.33	6168			mito protein domain+, coexpression				15	15	16	14	16	15
	O70251	Elongation factor 1-beta	EF1B_MOUSE	Eef1b	1041405	1024774	1171312	782436	955909	865674		1.07916e+06	868006							17	17	16	16	15	16
	P57776	Elongation factor 1-delta	EF1D_MOUSE	Eef1d	1022047	992898	1031960	729165	872875	845819		1015635	815953							17	18	18	19	18	17
	Q9D1M4	Eukaryotic translation elongation factor 1 epsilon-1	MCA3_MOUSE	Eef1e1	123134	119693	114956	82083	97610	92805		119261	90832.7			mito protein domain				11	11	10	10	10	11
	Q9D8N0	Elongation factor 1-gamma	EF1G_MOUSE	Eef1g	1785536	1738202	1773828	1187061	1427835	1440517		1.76586e+06	1.3518e+06			mito protein domain				32	33	32	31	32	33
	P58252	Elongation factor 2	EF2_MOUSE	Eef2	4589700	4598232	4439960	3147359	3789793	3680395		4.54263e+06	3.53918e+06			Rickettsial homolog, mito protein domain				71	69	64	64	66	68
	Q3UZW7;Q3UZW7-3	Protein-lysine N-methyltransferase EEF2KMT;Isoform 3 of Protein-lysine N-methyltransferase EEF2KMT	EF2KT_MOUSE	Eef2kmt	1245	720	457	387	373	425		807.333	395			induction				2	2	2	2	2	2
	Q9JHW4	Selenocysteine-specific elongation factor	SELB_MOUSE	Eefsec	27351	27445	26755	26274	27433	23540		27183.7	25749			targetP signal, yeast mito homolog+, Rickettsial homolog, mito protein domain				25	27	25	24	27	27
	Q9D8Y0	EF-hand domain-containing protein D2	EFHD2_MOUSE	Efhd2	323241	316829	310515	270561	280557	286280		316862	279133							19	20	19	18	19	19
	Q8C0D5	Elongation factor-like GTPase 1	EFL1_MOUSE	Efl1	20322	18314	16810	11123	13426	13600		18482	12716.3			Rickettsial homolog, mito protein domain				27	27	28	27	27	27
	Q8BG67;Q8BG67-2	Protein EFR3 homolog A;Isoform 2 of Protein EFR3 homolog A	EFR3A_MOUSE	Efr3a	11812	14201	13128	10013	12190	12506		13047	11569.7			yeast mito homolog, induction				27	27	24	26	27	28
	O08810	116 kDa U5 small nuclear ribonucleoprotein component	U5S1_MOUSE	Eftud2	260340	268327	288553	228284	256920	258241		272407	247815			Rickettsial homolog, mito protein domain, coexpression				60	61	57	57	56	58
	Q91YE3	Egl nine homolog 1	EGLN1_MOUSE	Egln1	8967	9917	11672	8305	9834	8684		10185.3	8941			induction, coexpression				8	10	10	9	9	9
	P08046	Early growth response protein 1	EGR1_MOUSE	Egr1	407	763	475	242	439	470		548.333	383.667							3	5	5	3	4	4
	P43300	Early growth response protein 3	EGR3_MOUSE	Egr3	82	72	74	22	11	57		76	30							1	2	2	2	1	2
	Q99MS7	EH domain-binding protein 1-like protein 1	EH1L1_MOUSE	Ehbp1l1	7960	3279	7697	1679	3059	3050		6312	2596							17	17	17	17	18	18
	Q9WVK4	EH domain-containing protein 1	EHD1_MOUSE	Ehd1	120240	132305	139671	84711	111316	112294		130739	102774			mito protein domain				25	25	25	23	23	25
	Q9QXY6	EH domain-containing protein 3	EHD3_MOUSE	Ehd3	75128	74076	67939	45590	57981	58441		72381	54004			mito protein domain				27	27	26	27	26	29
	Q9EQP2	EH domain-containing protein 4	EHD4_MOUSE	Ehd4	240318	220858	238192	150015	181991	184572		233123	172193			targetP signal, mito protein domain				24	24	24	24	24	24
	Q9DBM2	Peroxisomal bifunctional enzyme	ECHP_MOUSE	Ehhadh	2579	2144	2085	1462	1848	1722		2269.33	1677.33		MitoCarta3.0	yeast mito homolog+, Rickettsial homolog, mito protein domain, coexpression, MS/MS+	unknown	Metabolism > Lipid metabolism		4	4	4	4	4	4
	Q5DW34;Q5DW34-2	Histone-lysine N-methyltransferase EHMT1;Isoform 2 of Histone-lysine N-methyltransferase EHMT1	EHMT1_MOUSE	Ehmt1	4538	3818	2816	2658	2886	2619		3724	2721			Rickettsial homolog, mito protein domain				17	17	16	17	17	17
	Q9Z148-2	Isoform 2 of Histone-lysine N-methyltransferase EHMT2	EHMT2_MOUSE	Ehmt2	2435	2092	2548	2284	2498	2293		2358.33	2358.33			Rickettsial homolog, mito protein domain				14	12	12	13	13	14
	Q61070	Etoposide-induced protein 2.4	EI24_MOUSE	Ei24	7679	7041	7563	5888	6360	6161		7427.67	6136.33			coexpression				4	4	4	4	4	4
	P48024	Eukaryotic translation initiation factor 1	EIF1_MOUSE	Eif1	882111	751743	819513	557939	638034	598483		817789	598152							14	14	14	14	14	14
	Q60872	Eukaryotic translation initiation factor 1A	IF1A_MOUSE	Eif1a	229993	245921	273637	196027	226751	207959		249850	210246							8	8	8	8	8	8
	Q3THJ3	Probable RNA-binding protein EIF1AD	EIF1A_MOUSE	Eif1ad	34783	33493	36612	24679	31488	29836		34962.7	28667.7			induction				5	5	5	5	5	5
	Q8BMJ3	Eukaryotic translation initiation factor 1A, X-chromosomal	IF1AX_MOUSE	Eif1ax	121791	111370	106023	81777	93684	85150		113061	86870.3			Rickettsial homolog, coexpression				4	4	4	4	4	4
	Q9CXU9	Eukaryotic translation initiation factor 1b	EIF1B_MOUSE	Eif1b	28578	18157	13428	11566	12557	12535		20054.3	12219.3			MS/MS				3	4	3	3	3	3
	Q8BJW6	Eukaryotic translation initiation factor 2A	EIF2A_MOUSE	Eif2a	234632	117318	120205	175776	208540	107217		157385	163844							30	30	29	29	30	30
	Q03963	Interferon-induced, double-stranded RNA-activated protein kinase	E2AK2_MOUSE	Eif2ak2	9201	9139	9279	6022	8064	7643		9206.33	7243			mito protein domain				11	11	11	10	11	11
	Q9Z2B5	Eukaryotic translation initiation factor 2-alpha kinase 3	E2AK3_MOUSE	Eif2ak3	3567	2694	4404	1532	2159	2365		3555	2018.67			mito protein domain				8	8	9	9	9	9
	Q9QZ05;Q9QZ05-2;Q9QZ05-3;Q9QZ05-4	eIF-2-alpha kinase GCN2;Isoform 2 of eIF-2-alpha kinase GCN2;Isoform 3 of eIF-2-alpha kinase GCN2;Isoform 4 of eIF-2-alpha kinase GCN2	E2AK4_MOUSE	Eif2ak4	2900	2499	2933	3673	328	2687		2777.33	2229.33			mito protein domain				4	4	4	4	4	4
	Q99LC8	Translation initiation factor eIF-2B subunit alpha	EI2BA_MOUSE	Eif2b1	72806	64477	56762	43996	51208	54231		64681.7	49811.7							16	16	16	16	16	16
	Q99LD9	Translation initiation factor eIF-2B subunit beta	EI2BB_MOUSE	Eif2b2	47928	44287	45611	36085	44019	42247		45942	40783.7			yeast mito homolog				14	15	15	15	15	15
	B1AUN2	Eukaryotic translation initiation factor 2B, subunit 3	B1AUN2_MOUSE	Eif2b3	63929	63924	67390	51184	46577	55020		65081	50927			Rickettsial homolog				28	28	28	28	28	28
	Q61749;Q61749-2	Translation initiation factor eIF-2B subunit delta;Isoform 2 of Translation initiation factor eIF-2B subunit delta	EI2BD_MOUSE	Eif2b4	46130	47167	49600	35040	42670	42430		47632.3	40046.7			induction, coexpression				19	19	18	17	18	19
	Q8CHW4	Translation initiation factor eIF-2B subunit epsilon	EI2BE_MOUSE	Eif2b5	37959	35864	34194	25748	29380	30049		36005.7	28392.3			mito protein domain, coexpression				23	23	23	23	23	23
	Q61211	Eukaryotic translation initiation factor 2D	EIF2D_MOUSE	Eif2d	36411	33875	34249	26203	31098	30243		34845	29181.3			targetP signal				22	23	23	22	23	22
	Q6ZWX6	Eukaryotic translation initiation factor 2 subunit 1	IF2A_MOUSE	Eif2s1	847393	812145	862082	648471	762707	707478		840540	706219			mito protein domain				30	31	27	28	29	30
	Q99L45	Eukaryotic translation initiation factor 2 subunit 2	IF2B_MOUSE	Eif2s2	417848	428799	465402	326005	398564	372379		437350	365649							33	34	32	32	32	32
	Q9Z0N1	Eukaryotic translation initiation factor 2 subunit 3, X-linked	IF2G_MOUSE	Eif2s3x	90130	104423	103765	77831	91995	91053		99439.3	86959.7			Rickettsial homolog, mito protein domain				7	7	6	6	6	7
	Q9Z0N2	Eukaryotic translation initiation factor 2 subunit 3, Y-linked	IF2H_MOUSE	Eif2s3y	357638	354106	361480	266987	328918	324057		357741	306654			Rickettsial homolog, mito protein domain, coexpression				25	25	24	24	25	25
	P23116	Eukaryotic translation initiation factor 3 subunit A	EIF3A_MOUSE	Eif3a	334880	303151	301638	246190	259478	256789		313223	254152							86	88	82	82	85	88
	Q8JZQ9	Eukaryotic translation initiation factor 3 subunit B	EIF3B_MOUSE	Eif3b	357646	356708	388774	291240	336374	316340		367709	314651			mito protein domain, coexpression				52	51	46	47	52	52
	Q8R1B4	Eukaryotic translation initiation factor 3 subunit C	EIF3C_MOUSE	Eif3c	266411	247298	254134	184327	219938	212397		255948	205554			coexpression				39	42	41	40	41	41
	O70194	Eukaryotic translation initiation factor 3 subunit D	EIF3D_MOUSE	Eif3d	231611	244825	246110	185853	220623	214927		240849	207134			coexpression				29	29	29	28	29	29
	P60229	Eukaryotic translation initiation factor 3 subunit E	EIF3E_MOUSE	Eif3e	400568	366953	372361	287883	323257	329268		379961	313469							28	29	29	27	28	28
	Q9DCH4	Eukaryotic translation initiation factor 3 subunit F	EIF3F_MOUSE	Eif3f	360143	350315	340742	257652	303715	279509		350400	280292							16	16	15	15	14	16
	Q9Z1D1	Eukaryotic translation initiation factor 3 subunit G	EIF3G_MOUSE	Eif3g	285024	294944	300806	228719	269377	271292		293591	256463			mito protein domain				26	26	23	22	25	26
	Q91WK2	Eukaryotic translation initiation factor 3 subunit H	EIF3H_MOUSE	Eif3h	348258	323381	321013	244274	278959	266149		330884	263127			yeast mito homolog, coexpression				24	23	23	23	23	23
	Q9QZD9	Eukaryotic translation initiation factor 3 subunit I	EIF3I_MOUSE	Eif3i	413476	413279	411090	315091	366083	350337		412615	343837			mito protein domain, coexpression				21	22	21	20	22	21
	Q3UGC7	Eukaryotic translation initiation factor 3 subunit J-A	EI3JA_MOUSE	Eif3j1	253814	243810	260310	210367	228836	227169		252645	222124							18	19	18	18	18	19
	Q9DBZ5	Eukaryotic translation initiation factor 3 subunit K	EIF3K_MOUSE	Eif3k	176722	185594	196827	143886	178900	139734		186381	154173							13	12	12	12	11	13
	Q8QZY1	Eukaryotic translation initiation factor 3 subunit L	EIF3L_MOUSE	Eif3l	336172	301720	312615	251160	273997	259246		316836	261468			induction				33	34	31	32	32	33
	Q99JX4	Eukaryotic translation initiation factor 3 subunit M	EIF3M_MOUSE	Eif3m	345790	287789	324742	214326	264176	238931		319440	239144							22	20	20	21	20	20
	P60843	Eukaryotic initiation factor 4A-I	IF4A1_MOUSE	Eif4a1	4490028	4350958	4155801	2948577	3649361	3531669		4.33226e+06	3.37654e+06			Rickettsial homolog, mito protein domain				32	32	31	31	31	32
	P10630;P10630-2	Eukaryotic initiation factor 4A-II;Isoform 2 of Eukaryotic initiation factor 4A-II	IF4A2_MOUSE	Eif4a2	24064	37724	25975	14034	21851	25775		29254.3	20553.3			Rickettsial homolog, mito protein domain				10	11	10	11	11	10
	Q91VC3	Eukaryotic initiation factor 4A-III	IF4A3_MOUSE	Eif4a3	468480	447492	452017	395610	417348	408597		455996	407185			Rickettsial homolog, mito protein domain				27	27	25	27	27	26
	Q8BGD9	Eukaryotic translation initiation factor 4B	IF4B_MOUSE	Eif4b	129238	144714	156058	125478	142300	140885		143337	136221			mito protein domain				36	37	35	35	34	35
	P63073	Eukaryotic translation initiation factor 4E	IF4E_MOUSE	Eif4e	243601	243690	246363	182151	209493	211130		244551	200925			coexpression				12	11	12	12	12	12
	Q8BMB3	Eukaryotic translation initiation factor 4E type 2	IF4E2_MOUSE	Eif4e2	23802	21570	12339	10325	11935	10745		19237	11001.7							8	8	8	8	8	8
	Q9DBB5	Eukaryotic translation initiation factor 4E type 3	IF4E3_MOUSE	Eif4e3	11721	9235	14328	12105	12339	10498		11761.3	11647.3			induction, coexpression				6	5	7	6	5	7
	P70445	Eukaryotic translation initiation factor 4E-binding protein 2	4EBP2_MOUSE	Eif4ebp2	490	2996	2483	3703	563	2478		1989.67	2248			targetP signal, coexpression				2	3	3	3	2	2
	Q9EST3	Eukaryotic translation initiation factor 4E transporter	4ET_MOUSE	Eif4enif1	4729	4400	4877	4217	4577	4048		4668.67	4280.67							17	17	16	16	16	16
	Q6NZJ6	Eukaryotic translation initiation factor 4 gamma 1	IF4G1_MOUSE	Eif4g1	127147	126821	134946	101793	117765	110200		129638	109919			yeast mito homolog, coexpression				65	65	61	63	64	65
	Q62448	Eukaryotic translation initiation factor 4 gamma 2	IF4G2_MOUSE	Eif4g2	131946	124240	125977	85513	109064	106786		127388	100454							46	47	44	44	44	44
	Q80XI3-2;Q80XI3-4	Isoform 2 of Eukaryotic translation initiation factor 4 gamma 3;Isoform 4 of Eukaryotic translation initiation factor 4 gamma 3	IF4G3_MOUSE	Eif4g3	26543	26901	24621	19628	23986	21932		26021.7	21848.7			targetP signal				40	41	39	39	40	40
	Q9WUK2	Eukaryotic translation initiation factor 4H	IF4H_MOUSE	Eif4h	220997	212848	258776	232714	250925	214762		230874	232800			yeast mito homolog, mito protein domain				16	16	13	13	14	15
	P59325	Eukaryotic translation initiation factor 5	IF5_MOUSE	Eif5	731229	648808	764939	201259	582839	451999		714992	412032							25	25	24	24	25	24
	P63242	Eukaryotic translation initiation factor 5A-1	IF5A1_MOUSE	Eif5a	6550113	5954624	5116460	4059012	4813366	4758117		5.87373e+06	4.5435e+06			yeast mito homolog, Rickettsial homolog				20	20	18	17	19	19
	Q05D44	Eukaryotic translation initiation factor 5B	IF2P_MOUSE	Eif5b	121422	72494	64515	49029	56974	55823		86143.7	53942			yeast mito homolog, Rickettsial homolog, mito protein domain				54	54	53	53	54	54
	O55135	Eukaryotic translation initiation factor 6	IF6_MOUSE	Eif6	552994	463829	521660	360631	443531	358592		512828	387585			coexpression				11	11	11	11	11	11
	Q8K0G5	EARP and GARP complex-interacting protein 1	EIPR1_MOUSE	Eipr1	9392	8264	6427	6135	6808	6753		8027.67	6565.33			mito protein domain				8	9	9	9	9	9
	Q80Y81;Q80Y81-2	Zinc phosphodiesterase ELAC protein 2;Isoform 2 of Zinc phosphodiesterase ELAC protein 2	RNZ2_MOUSE	Elac2	35547	34212	35292	25795	30592	28820		35017	28402.3		MitoCarta3.0	APEX_matrix, GFP, targetP signal, yeast mito homolog, Rickettsial homolog, mito protein domain, MS/MS	Matrix	Mitochondrial central dogma > mtRNA metabolism > Polycistronic mtRNA processing		32	34	33	32	33	33
	P70372	ELAV-like protein 1	ELAV1_MOUSE	Elavl1	451440	471444	498980	403256	459649	463006		473955	441970			mito protein domain				20	20	19	18	20	20
	Q60775	ETS-related transcription factor Elf-1	ELF1_MOUSE	Elf1	11719	12074	12160	10923	12623	12559		11984.3	12035							10	11	11	11	11	11
	Q9JHC9-3;Q9JHC9-4	Isoform 2 of ETS-related transcription factor Elf-2;Isoform 3 of ETS-related transcription factor Elf-2	ELF2_MOUSE	Elf2	5350	6071	5887	6262	5477	5864		5769.33	5867.67							8	10	10	10	9	10
	Q9Z2U4	ETS-related transcription factor Elf-4	ELF4_MOUSE	Elf4	1747	1552	1679	1426	1606	1609		1659.33	1547							3	3	3	3	3	3
	O08856	RNA polymerase II elongation factor ELL	ELL_MOUSE	Ell	12174	11136	11661	8711	10335	10833		11657	9959.67							17	16	17	16	17	17
	Q8BPU7	Engulfment and cell motility protein 1	ELMO1_MOUSE	Elmo1	97990	91037	94579	73244	83739	79309		94535.3	78764			yeast mito homolog				38	38	37	36	38	38
	Q8BHL5;Q8BHL5-2	Engulfment and cell motility protein 2;Isoform 2 of Engulfment and cell motility protein 2	ELMO2_MOUSE	Elmo2	16037	16209	16674	10126	12277	14456		16306.7	12286.3							16	16	16	16	16	16
	Q8CB77	Elongin-A	ELOA1_MOUSE	Eloa	10177	11127	12120	9633	10808	10481		11141.3	10307.3							18	19	18	19	19	19
	P62869	Elongin-B	ELOB_MOUSE	Elob	435859	421389	485294	348084	417123	380897		447514	382035							13	13	13	13	13	13
	P83940	Elongin-C	ELOC_MOUSE	Eloc	224364	235058	248989	186537	219721	184425		236137	196894			coexpression				8	7	7	7	8	8
	Q9JLJ5	Elongation of very long chain fatty acids protein 1	ELOV1_MOUSE	Elovl1	24421	14050	22408	16938	18381	17306		20293	17541.7							4	4	4	4	4	4
	Q8BHI7	Elongation of very long chain fatty acids protein 5	ELOV5_MOUSE	Elovl5	18892	18670	17074	15016	16653	13527		18212	15065.3			coexpression				3	4	2	4	4	4
	Q7TT37	Elongator complex protein 1	ELP1_MOUSE	Elp1	24428	23262	22927	17991	20205	18966		23539	19054							41	41	40	41	40	41
	Q91WG4	Elongator complex protein 2	ELP2_MOUSE	Elp2	33129	30041	30104	24002	28164	24955		31091.3	25707			mito protein domain				26	25	26	26	26	26
	Q9CZX0	Elongator complex protein 3	ELP3_MOUSE	Elp3	42343	39546	40720	28753	34717	37626		40869.7	33698.7			Rickettsial homolog, mito protein domain				23	23	23	23	23	23
	Q9ER73	Elongator complex protein 4	ELP4_MOUSE	Elp4	11644	13143	11610	10137	11433	10583		12132.3	10717.7							13	13	13	14	14	14
	Q99L85	Elongator complex protein 5	ELP5_MOUSE	Elp5	7059	8227	7107	5414	6425	5802		7464.33	5880.33							4	4	4	4	4	4
	Q8BK75;Q8BK75-2	Elongator complex protein 6;Isoform 2 of Elongator complex protein 6	ELP6_MOUSE	Elp6	10904	9966	9986	7321	7454	7381		10285.3	7385.33							6	6	6	6	6	6
	P21995	Embigin	EMB_MOUSE	Emb	65831	61082	67629	54007	62441	62967		64847.3	59805							9	9	9	9	9	9
	Q8C7X2-2	Isoform 2 of ER membrane protein complex subunit 1	EMC1_MOUSE	Emc1	37021	29887	30180	21962	26233	26368		32362.7	24854.3							34	34	32	33	32	33
	Q3TAS6;Q3TAS6-2	ER membrane protein complex subunit 10;Isoform 2 of ER membrane protein complex subunit 10	EMC10_MOUSE	Emc10	14623	13799	13551	10184	11486	11570		13991	11080			targetP signal				4	4	4	4	4	4
	Q9CRD2	ER membrane protein complex subunit 2	EMC2_MOUSE	Emc2	34497	28541	28433	21726	26815	23107		30490.3	23882.7			GFP, mito protein domain, induction				12	12	12	12	11	12
	Q99KI3	ER membrane protein complex subunit 3	EMC3_MOUSE	Emc3	28421	35410	41357	31916	31813	31419		35062.7	31716			coexpression				8	10	9	10	9	10
	Q9CZX9	ER membrane protein complex subunit 4	EMC4_MOUSE	Emc4	22794	23482	23395	18924	21155	19635		23223.7	19904.7							5	5	5	5	5	5
	Q9CQW0	ER membrane protein complex subunit 6	EMC6_MOUSE	Emc6	21847	22830	31933	22800	24594	23890		25536.7	23761.3			coexpression++				2	2	2	2	2	2
	Q9EP72	ER membrane protein complex subunit 7	EMC7_MOUSE	Emc7	51966	55067	64821	50507	62439	61514		57284.7	58153.3							7	7	7	7	7	7
	O70378	ER membrane protein complex subunit 8	EMC8_MOUSE	Emc8	48890	48545	49156	37266	43735	42065		48863.7	41022							10	10	10	10	10	10
	O08579	Emerin	EMD_MOUSE	Emd	74747	63874	79348	70718	80162	64395		72656.3	71758.3							14	14	15	14	14	15
	Q8BJW7	Crossover junction endonuclease EME1	EME1_MOUSE	Eme1	573	512	354	484	492	395		479.667	457							2	2	2	2	1	1
	O35130	Ribosomal RNA small subunit methyltransferase NEP1	NEP1_MOUSE	Emg1	144311	133542	126482	106995	121299	111044		134778	113113			induction				17	17	16	17	17	17
	Q8K482	EMILIN-2	EMIL2_MOUSE	Emilin2	1595	1399	1221	752	1162	1623		1405	1179							5	5	5	5	4	5
	Q7TNG5	Echinoderm microtubule-associated protein-like 2	EMAL2_MOUSE	Eml2	21906	23344	24108	17588	20461	20737		23119.3	19595.3			mito protein domain				17	17	17	17	17	17
	Q8VC03	Echinoderm microtubule-associated protein-like 3	EMAL3_MOUSE	Eml3	9266	9235	9353	8166	8625	8665		9284.67	8485.33			mito protein domain				20	19	19	20	20	20
	Q3UMY5	Echinoderm microtubule-associated protein-like 4	EMAL4_MOUSE	Eml4	21956	20360	21701	19073	20199	20214		21339	19828.7			mito protein domain				34	34	32	34	35	36
	Q8BMB0;Q8BMB0-2;Q8BMB0-3	BRCA2-interacting transcriptional repressor EMSY;Isoform 2 of BRCA2-interacting transcriptional repressor EMSY;Isoform 3 of BRCA2-interacting transcriptional repressor EMSY	EMSY_MOUSE	Emsy	553	606	563	526	516	385		574	475.667							3	6	6	6	6	5
	Q03173;Q03173-3;Q03173-4;Q03173-5;Q03173-6	Protein enabled homolog;Isoform 2 of Protein enabled homolog;Isoform 3 of Protein enabled homolog;Isoform 4 of Protein enabled homolog;Isoform 6 of Protein enabled homolog	ENAH_MOUSE	Enah	922	1249	1130	1293	1335	1099		1100.33	1242.33							6	7	7	7	7	7
	Q8C522	Endonuclease domain-containing 1 protein	ENDD1_MOUSE	Endod1	27120	27559	27618	13882	20111	19980		27432.3	17991							12	12	12	12	12	11
	O08600	Endonuclease G, mitochondrial	NUCG_MOUSE	Endog	14774	15199	13493	11451	12383	12567		14488.7	12133.7		MitoCarta3.0	literature, APEX_IMS, yeast mito homolog, mito protein domain, coexpression++, MS/MS	IMS	Mitochondrial central dogma > mtDNA maintenance > mtDNA stability and decay | Mitochondrial central dogma > mtRNA metabolism > mtRNA stability and decay | Mitochondrial dynamics and surveillance > Apoptosis		7	7	7	7	7	7
	Q8BX80	Cytosolic endo-beta-N-acetylglucosaminidase	ENASE_MOUSE	Engase	1550	1252	1300	879	1189	1177		1367.33	1081.67							5	5	5	5	5	5
	P17182	Alpha-enolase	ENOA_MOUSE	Eno1	15290782	15293607	13721830	9802240	12157013	12313667		1.47687e+07	1.14243e+07							36	38	33	34	37	38
	P17183	Gamma-enolase	ENOG_MOUSE	Eno2	2291324	2094581	2497609	1720643	1750099	1691596		2.2945e+06	1.72078e+06			yeast mito homolog				5	5	5	5	5	5
	P21550	Beta-enolase	ENOB_MOUSE	Eno3	1687060	1521503	1243517	840970	1121288	1159405		1.48403e+06	1.04055e+06			yeast mito homolog				12	12	11	12	12	12
	Q8BGB7	Enolase-phosphatase E1	ENOPH_MOUSE	Enoph1	155012	138084	130608	118348	130254	115702		141235	121435							6	6	6	6	6	6
	Q8BTJ4;Q8BTJ4-2	Bis(5'-adenosyl)-triphosphatase enpp4;Isoform 2 of Bis(5'-adenosyl)-triphosphatase enpp4	ENPP4_MOUSE	Enpp4	7282	6588	6818	4093	4887	4961		6896	4647			induction, MS/MS				6	6	5	5	5	5
	P60840;P60840-2	Alpha-endosulfine;Isoform 2 of Alpha-endosulfine	ENSA_MOUSE	Ensa	60790	72042	93130	74299	77188	74489		75320.7	75325.3							8	9	8	7	7	8
	P55772	Ectonucleoside triphosphate diphosphohydrolase 1	ENTP1_MOUSE	Entpd1	39634	44653	40838	28678	32624	36192		41708.3	32498							12	13	12	12	12	13
	Q9WUZ9	Ectonucleoside triphosphate diphosphohydrolase 5	ENTP5_MOUSE	Entpd5	8785	7984	34480	17701	29792	33409		17083	26967.3			coexpression				10	8	8	10	10	10
	Q3U0P5	Ectonucleoside triphosphate diphosphohydrolase 6	Q3U0P5_MOUSE	Entpd6	1613	1878	1692	1767	2032	1589		1727.67	1796							3	4	4	4	4	4
	Q9JIX0	Transcription and mRNA export factor ENY2	ENY2_MOUSE	Eny2	147803	101287	107590	81482	88681	79706		118893	83289.7			coexpression				5	5	4	4	4	5
	O54839	Eomesodermin homolog	EOMES_MOUSE	Eomes	24035	24096	55188	18488	19306	19907		34439.7	19233.7							20	20	21	21	21	21
	B2RWS6	Histone acetyltransferase p300	EP300_MOUSE	Ep300	1286	1560	1473	1234	1401	1372		1439.67	1335.67							18	20	19	19	18	19
	Q8CHI8;Q8CHI8-2;Q8CHI8-3;Q8CHI8-4	E1A-binding protein p400;Isoform 2 of E1A-binding protein p400;Isoform 3 of E1A-binding protein p400;Isoform 4 of E1A-binding protein p400	EP400_MOUSE	Ep400	4075	2586	3097	2833	2953	2935		3252.67	2907			mito protein domain				36	35	37	37	36	37
	P48193;P48193-2	Protein 4.1;Isoform 2 of Protein 4.1	41_MOUSE	Epb41	14125	13683	13326	10665	13126	12184		13711.3	11991.7			coexpression				22	21	20	21	22	22
	O70318	Band 4.1-like protein 2	E41L2_MOUSE	Epb41l2	14468	14004	15301	14018	14093	13630		14591	13913.7							38	40	38	38	39	37
	Q9WV92;Q9WV92-2;Q9WV92-3	Band 4.1-like protein 3;Isoform 2 of Band 4.1-like protein 3;Isoform 3 of Band 4.1-like protein 3	E41L3_MOUSE	Epb41l3	1612	1683	1089	1109	1031	1052		1461.33	1064							4	5	4	5	5	5
	Q8C9X6;Q8C9X6-2	Enhancer of polycomb homolog 1;Isoform 2 of Enhancer of polycomb homolog 1	EPC1_MOUSE	Epc1	425	544	494	371	397	431		487.667	399.667							5	6	6	5	5	6
	Q8C0I4	Enhancer of polycomb homolog 2	EPC2_MOUSE	Epc2	2726	1604	1661	1503	1702	805		1997	1336.67							4	4	4	4	4	4
	Q80TA9	Ectopic P granules protein 5 homolog	EPG5_MOUSE	Epg5	344	234	213	150	183	192		263.667	175							7	6	7	7	7	7
	Q9D379	Epoxide hydrolase 1	HYEP_MOUSE	Ephx1	343	227	65	194	294	158		211.667	215.333			mito protein domain				2	3	1	2	4	2
	Q8VEH5	EPM2A-interacting protein 1	EPMIP_MOUSE	Epm2aip1	2664	2666	3174	2534	3020	2920		2834.67	2824.67							8	7	8	8	8	8
	Q80VP1;Q80VP1-2	Epsin-1;Isoform 2 of Epsin-1	EPN1_MOUSE	Epn1	3173	3477	3241	3326	3627	2988		3297	3313.67			coexpression				4	5	5	5	5	5
	Q8CGC7	Bifunctional glutamate/proline--tRNA ligase	SYEP_MOUSE	Eprs1	194405	192238	188393	137473	167791	159628		191679	154964			Rickettsial homolog, mito protein domain, coexpression				101	103	93	92	96	99
	P42567	Epidermal growth factor receptor substrate 15	EPS15_MOUSE	Eps15	17583	17132	16003	13335	14288	13887		16906	13836.7			mito protein domain				23	25	24	25	24	24
	Q60902;Q60902-2	Epidermal growth factor receptor substrate 15-like 1;Isoform 2 of Epidermal growth factor receptor substrate 15-like 1	EP15R_MOUSE	Eps15l1	29117	25435	27091	23061	23018	21531		27214.3	22536.7							33	34	35	35	35	35
	Q08509	Epidermal growth factor receptor kinase substrate 8	EPS8_MOUSE	Eps8	1802	1302	1940	1242	1526	1309		1681.33	1359			mito protein domain				5	4	5	4	4	3
	Q8VDI1	Epithelial-stromal interaction protein 1	ESIP1_MOUSE	Epsti1	22749	23455	27406	22866	24580	23434		24536.7	23626.7							12	13	13	13	13	12
	Q9CZU4	GTPase Era, mitochondrial	ERAL1_MOUSE	Eral1	65267	56647	75449	48943	54651	51855		65787.7	51816.3		MitoCarta3.0	APEX_matrix, targetP signal+, yeast mito homolog+, Rickettsial homolog, mito protein domain, induction, coexpression++	Matrix	Mitochondrial central dogma > mtRNA metabolism > mtRNA granules | Mitochondrial central dogma > Translation > Mitochondrial ribosome assembly		7	5	7	7	7	7
	Q9EQH2	Endoplasmic reticulum aminopeptidase 1	ERAP1_MOUSE	Erap1	146209	139871	133896	113743	124272	117399		139992	118471			yeast mito homolog, mito protein domain				47	48	45	45	45	47
	Q80TH2;Q80TH2-1;Q80TH2-2	Erbin;Isoform 1 of Erbin;Isoform 2 of Erbin	ERBIN_MOUSE	Erbin	6662	5460	8425	5923	6733	5569		6849	6075			yeast mito homolog, mito protein domain				17	16	17	17	17	17
	Q99MI1;Q99MI1-2	ELKS/Rab6-interacting/CAST family member 1;Isoform 2 of ELKS/Rab6-interacting/CAST family member 1	RB6I2_MOUSE	Erc1	813	707	643	466	590	633		721	563							4	4	4	4	4	4
	P07903	DNA excision repair protein ERCC-1	ERCC1_MOUSE	Ercc1	4155	3157	2901	2142	3187	2439		3404.33	2589.33			mito protein domain				6	5	6	5	6	5
	O08811	General transcription and DNA repair factor IIH helicase subunit XPD	ERCC2_MOUSE	Ercc2	4665	3718	3789	2683	2663	2646		4057.33	2664							9	8	9	9	8	8
	P49135	General transcription and DNA repair factor IIH helicase subunit XPB	ERCC3_MOUSE	Ercc3	6110	5196	4802	3556	4417	4061		5369.33	4011.33			mito protein domain				14	14	14	14	14	14
	Q9QZD4	DNA repair endonuclease XPF	XPF_MOUSE	Ercc4	3295	2477	2230	1782	1983	1879		2667.33	1881.33							10	10	11	11	11	10
	Q8BHK9	DNA excision repair protein ERCC-6-like	ERC6L_MOUSE	Ercc6l	200915	18212	213715	178404	186499	213242		144281	192715			mito protein domain				26	26	26	26	26	24
	Q9ERY9	Ergosterol biosynthetic protein 28 homolog	ERG28_MOUSE	Erg28	21596	23775	27782	19139	22141	26952		24384.3	22744			MS/MS				5	5	5	5	5	5
	Q9DC16	Endoplasmic reticulum-Golgi intermediate compartment protein 1	ERGI1_MOUSE	Ergic1	58749	62879	59898	49867	52782	55198		60508.7	52615.7							11	11	11	11	11	11
	Q9CR89	Endoplasmic reticulum-Golgi intermediate compartment protein 2	ERGI2_MOUSE	Ergic2	6134	5463	4812	3710	4526	4773		5469.67	4336.33			targetP signal, coexpression				5	6	5	5	5	5
	Q9CQE7;Q9CQE7-2	Endoplasmic reticulum-Golgi intermediate compartment protein 3;Isoform 2 of Endoplasmic reticulum-Golgi intermediate compartment protein 3	ERGI3_MOUSE	Ergic3	6637	6780	7749	5892	7102	6081		7055.33	6358.33							6	6	6	6	6	6
	P84089	Enhancer of rudimentary homolog	ERH_MOUSE	Erh	381513	400074	382952	298351	354080	259900		388180	304110							7	7	7	6	6	6
	Q7TMF2	3'-5' exoribonuclease 1	ERI1_MOUSE	Eri1	40104	34503	42807	33757	38567	36879		39138	36401			mito protein domain				10	10	10	10	10	11
	Q8C460;Q8C460-2;Q8C460-3	ERI1 exoribonuclease 3;Isoform 2 of ERI1 exoribonuclease 3;Isoform 3 of ERI1 exoribonuclease 3	ERI3_MOUSE	Eri3	3025	3117	2267	3174	3521	2927		2803	3207.33		MitoCarta3.0	targetP signal+, mito protein domain, MS/MS	Matrix			3	3	2	3	3	3
	E9PY43	Glutamate-rich 1	E9PY43_MOUSE	Erich1	2235	826	1761	1876	1787	1495		1607.33	1719.33							2	1	2	2	2	2
	Q8VEH8	Endoplasmic reticulum lectin 1	ERLEC_MOUSE	Erlec1	1674	1221	1383	1165	1441	1374		1426	1326.67			induction				4	3	4	5	5	5
	Q91X78	Erlin-1	ERLN1_MOUSE	Erlin1	451	406	468	606	645	622		441.667	624.333			Rickettsial homolog, mito protein domain, coexpression				2	1	1	2	2	2
	Q8BFZ9	Erlin-2	ERLN2_MOUSE	Erlin2	14605	14045	13944	10661	12658	11857		14198	11725.3			mito protein domain				9	9	9	9	9	9
	Q3UVK0	Endoplasmic reticulum metallopeptidase 1	ERMP1_MOUSE	Ermp1	19919	18172	15025	10002	12823	13340		17705.3	12055							19	19	18	18	18	17
	Q8R180	ERO1-like protein alpha	ERO1A_MOUSE	Ero1a	208350	205123	200362	80905	142328	147804		204612	123679			induction				29	29	29	29	29	29
	Q8R2E9	ERO1-like protein beta	ERO1B_MOUSE	Ero1b	54239	42939	35715	29714	35932	28743		44297.7	31463							10	10	10	10	10	8
	P57759	Endoplasmic reticulum resident protein 29	ERP29_MOUSE	Erp29	184822	191579	191502	146679	169756	169122		189301	161852							12	12	12	12	11	12
	Q9D1Q6	Endoplasmic reticulum resident protein 44	ERP44_MOUSE	Erp44	113220	107111	105417	85042	104132	101431		108583	96868.3			Rickettsial homolog, mito protein domain+				17	19	18	17	18	19
	Q8CIB9	N-acetyltransferase ESCO2	ESCO2_MOUSE	Esco2	9317	9612	7949	6600	6912	7286		8959.33	6932.67							7	8	8	9	8	10
	Q9R0P3	S-formylglutathione hydrolase	ESTD_MOUSE	Esd	299934	245982	267885	191828	225195	224711		271267	213911			targetP signal				15	15	14	15	15	16
	Q3V1V3	ESF1 homolog	ESF1_MOUSE	Esf1	9806	9565	9600	7277	8407	7831		9657	7838.33							23	22	22	22	23	23
	P60330	Separin	ESPL1_MOUSE	Espl1	4258	2768	2429	2021	2251	2222		3151.67	2164.67			yeast mito homolog				16	16	16	16	15	16
	O08580	Steroid hormone receptor ERR1	ERR1_MOUSE	Esrra	759	340	296	339	398	365		465	367.333			mito protein domain, induction				2	2	2	2	2	2
	O70279	Splicing factor ESS-2 homolog	ESS2_MOUSE	Ess2	3141	2932	2861	2666	2896	2531		2978	2697.67			targetP signal				8	7	7	8	8	8
	Q3U7R1	Extended synaptotagmin-1	ESYT1_MOUSE	Esyt1	389257	388527	398008	321241	353953	349214		391931	341469			yeast mito homolog				65	64	62	61	62	64
	Q3TZZ7	Extended synaptotagmin-2	ESYT2_MOUSE	Esyt2	38642	40815	33906	19154	22251	22245		37787.7	21216.7							34	33	33	35	33	34
	Q8BWY3	Eukaryotic peptide chain release factor subunit 1	ERF1_MOUSE	Etf1	324317	289207	305411	233651	267825	244619		306312	248698							30	30	30	29	30	30
	Q99LC5	Electron transfer flavoprotein subunit alpha, mitochondrial	ETFA_MOUSE	Etfa	306489	281978	256399	210828	241248	239135		281622	230404		MitoCarta3.0	literature, APEX_matrix, targetP signal, yeast mito homolog++, mito protein domain, induction, coexpression++, MS/MS++	Matrix	Metabolism > Lipid metabolism > Fatty acid oxidation | Metabolism > Amino acid metabolism > Branched-chain amino acid metabolism | Metabolism > Amino acid metabolism > Lysine metabolism | Metabolism > Amino acid metabolism > Glycine metabolism | Metabolism > Vitamin metabolism > Choline and betaine metabolism | Metabolism > Electron carriers > Q-linked reactions, other		19	19	17	16	17	18
	Q9DCW4	Electron transfer flavoprotein subunit beta	ETFB_MOUSE	Etfb	354050	337718	370199	297729	329569	314656		353989	313985		MitoCarta3.0	literature, APEX_matrix, yeast mito homolog, mito protein domain, induction, coexpression+, MS/MS++	Matrix	Metabolism > Lipid metabolism > Fatty acid oxidation | Metabolism > Amino acid metabolism > Branched-chain amino acid metabolism | Metabolism > Amino acid metabolism > Lysine metabolism | Metabolism > Amino acid metabolism > Glycine metabolism | Metabolism > Vitamin metabolism > Choline and betaine metabolism | Metabolism > Electron carriers > Q-linked reactions, other		16	16	15	15	15	15
	Q921G7	Electron transfer flavoprotein-ubiquinone oxidoreductase, mitochondrial	ETFD_MOUSE	Etfdh	16437	14803	17006	14153	15689	13202		16082	14348		MitoCarta3.0	literature, APEX_matrix, yeast mito homolog++, mito protein domain+, induction, coexpression++, MS/MS++	MIM	Metabolism > Lipid metabolism > Fatty acid oxidation | Metabolism > Amino acid metabolism > Branched-chain amino acid metabolism | Metabolism > Amino acid metabolism > Lysine metabolism | Metabolism > Amino acid metabolism > Glycine metabolism | Metabolism > Metals and cofactors > Fe-S-containing proteins | Metabolism > Vitamin metabolism > Choline and betaine metabolism | Metabolism > Electron c…		20	21	21	21	21	20
	Q9DCM0	Persulfide dioxygenase ETHE1, mitochondrial	ETHE1_MOUSE	Ethe1	31730	30455	31059	24964	30446	28860		31081.3	28090		MitoCarta3.0	literature, APEX_matrix, targetP signal, yeast mito homolog++, mito protein domain, induction, MS/MS++	Matrix	Metabolism > Sulfur metabolism		11	11	11	11	11	11
	Q9D4V0	Ethanolamine kinase 1	EKI1_MOUSE	Etnk1	13370	12522	12694	8569	10483	10261		12862	9771			mito protein domain				6	6	6	6	6	6
	P27577	Protein C-ets-1	ETS1_MOUSE	Ets1	10592	13274	9672	10935	11056	10083		11179.3	10691.3							10	10	10	10	10	10
	Q8R4Z4	ETS translocation variant 3	ETV3_MOUSE	Etv3	2400	2683	2828	2210	2285	2554		2637	2349.67							5	6	6	6	6	6
	P97360	Transcription factor ETV6	ETV6_MOUSE	Etv6	2102	2156	3964	2026	2091	2082		2740.67	2066.33							3	3	3	3	3	3
	Q9D7G4	Protein EURL homolog	EURL_MOUSE	Eurl	2769	2592	2672	2113	2421	2446		2677.67	2326.67							4	4	4	4	4	4
	Q8VD58	Protein EVI2B	EVI2B_MOUSE	Evi2b	8291	8503	8649	5828	7779	7264		8481	6957							4	3	3	3	4	4
	P70429	Ena/VASP-like protein	EVL_MOUSE	Evl	189688	192888	184778	136119	165188	170261		189118	157189							23	24	24	24	23	23
	Q61545	RNA-binding protein EWS	EWS_MOUSE	Ewsr1	106102	114474	113751	99675	107883	102508		111442	103355			mito protein domain				10	10	10	10	10	9
	Q8R3S6	Exocyst complex component 1	EXOC1_MOUSE	Exoc1	104654	42447	85543	78127	86248	84274		77548	82883							20	20	18	19	18	19
	Q9D4H1	Exocyst complex component 2	EXOC2_MOUSE	Exoc2	16840	14545	18922	13693	16284	15205		16769	15060.7							19	19	19	19	19	19
	Q6KAR6	Exocyst complex component 3	EXOC3_MOUSE	Exoc3	10344	9369	10508	6861	9797	8980		10073.7	8546							20	20	20	20	21	21
	O35382	Exocyst complex component 4	EXOC4_MOUSE	Exoc4	22419	25983	21258	15387	20484	20065		23220	18645.3							30	30	29	29	29	30
	Q3TPX4	Exocyst complex component 5	EXOC5_MOUSE	Exoc5	22630	19746	19010	12944	16020	15350		20462	14771.3							20	20	19	18	20	19
	Q8R313	Exocyst complex component 6	EXOC6_MOUSE	Exoc6	9295	8477	9158	6652	7855	7787		8976.67	7431.33							17	17	18	18	18	18
	O35250;O35250-2	Exocyst complex component 7;Isoform 2 of Exocyst complex component 7	EXOC7_MOUSE	Exoc7	9584	8853	8042	6565	7707	7432		8826.33	7234.67							18	17	16	17	18	18
	Q6PGF7	Exocyst complex component 8	EXOC8_MOUSE	Exoc8	21933	29747	31726	26484	30471	33112		27802	30022.3			targetP signal				19	20	20	21	20	21
	Q8C163	Nuclease EXOG, mitochondrial	EXOG_MOUSE	Exog	11422	4923	4192	4462	4615	4646		6845.67	4574.33		MitoCarta3.0	APEX_IMS, targetP signal, yeast mito homolog, mito protein domain, MS/MS++	MIM	Mitochondrial central dogma > mtDNA maintenance > mtDNA replication | Mitochondrial central dogma > mtDNA maintenance > mtDNA repair | Mitochondrial central dogma > mtDNA maintenance > mtDNA stability and decay		8	8	7	8	8	8
	Q9DAA6	Exosome complex component CSL4	EXOS1_MOUSE	Exosc1	71074	67655	70820	59156	66684	64497		69849.7	63445.7			Rickettsial homolog, coexpression				9	9	8	9	9	9
	P56960	Exosome component 10	EXOSX_MOUSE	Exosc10	40669	39182	39217	33517	36012	34833		39689.3	34787.3			Rickettsial homolog, mito protein domain				39	39	39	39	40	40
	Q8VBV3	Exosome complex component RRP4	EXOS2_MOUSE	Exosc2	57724	51101	57946	50562	51703	48608		55590.3	50291							13	12	12	12	12	12
	Q7TQK4	Exosome complex component RRP40	EXOS3_MOUSE	Exosc3	71706	71828	66143	56058	61543	56943		69892.3	58181.3							14	14	13	13	13	13
	Q921I9	Exosome complex component RRP41	EXOS4_MOUSE	Exosc4	89582	76614	70344	57965	65424	64474		78846.7	62621			Rickettsial homolog, mito protein domain, coexpression				7	7	7	7	7	7
	Q9CRA8	Exosome complex component RRP46	EXOS5_MOUSE	Exosc5	58512	54798	61378	51679	56679	54215		58229.3	54191			Rickettsial homolog, mito protein domain				10	10	9	10	10	9
	Q8BTW3	Exosome complex component MTR3	EXOS6_MOUSE	Exosc6	42930	42908	50606	42662	45675	45314		45481.3	44550.3			mito protein domain				9	10	9	9	9	11
	Q9D0M0	Exosome complex exonuclease RRP42	EXOS7_MOUSE	Exosc7	52830	49985	50754	41642	47489	43125		51189.7	44085.3			mito protein domain				13	13	13	13	13	13
	Q9D753	Exosome complex component RRP43	EXOS8_MOUSE	Exosc8	72783	67103	79793	68981	74629	71358		73226.3	71656			Rickettsial homolog, mito protein domain				12	13	12	12	12	12
	Q9JHI7	Exosome complex component RRP45	EXOS9_MOUSE	Exosc9	45277	69990	53657	41804	47150	40633		56308	43195.7			mito protein domain				12	12	12	12	12	12
	P70428	Exostosin-2	EXT2_MOUSE	Ext2	643	731	475	428	520	285		616.333	411							2	2	2	2	2	1
	P97480	Eyes absent homolog 3	EYA3_MOUSE	Eya3	10996	13376	12050	10090	11040	11189		12140.7	10773							12	11	11	11	11	12
	P70351	Histone-lysine N-methyltransferase EZH1	EZH1_MOUSE	Ezh1	110	89	65	30	42	65		88	45.6667							2	2	2	2	2	2
	Q61188	Histone-lysine N-methyltransferase EZH2	EZH2_MOUSE	Ezh2	20610	18890	20088	17212	18836	18706		19862.7	18251.3							27	27	26	26	27	26
	P26040	Ezrin	EZRI_MOUSE	Ezr	428889	437879	430468	341077	394583	352020		432412	362560							36	37	32	33	33	33
	Q8BH61	Coagulation factor XIII A chain	F13A_MOUSE	F13a1	2189	1910	2112	1259	1369	1838		2070.33	1488.67							2	2	2	2	2	2
	P19221	Prothrombin	THRB_MOUSE	F2	19489	18026	16388	13764	15997	15640		17967.7	15133.7			mito protein domain				7	7	6	7	6	7
	P30558	Proteinase-activated receptor 1	PAR1_MOUSE	F2r	4605	5415	5828	3914	4825	5031		5282.67	4590							4	4	4	4	4	4
	O88783	Coagulation factor V	FA5_MOUSE	F5	4438	2558	1499	1710	1521	1715		2831.67	1648.67							8	9	7	8	8	7
	Q00558	40-kDa huntingtin-associated protein	HAP40_MOUSE	F8a1	2225	1661	1838	1754	1763	1871		1908	1796							3	3	3	3	3	3
	O08914	Fatty-acid amide hydrolase 1	FAAH1_MOUSE	Faah	8705	5607	6463	6988	7185	6264		6925	6812.33			Rickettsial homolog, mito protein domain				17	14	17	17	17	17
	A2ACJ2	Fanconi anemia core complex-associated protein 100	FP100_MOUSE	Faap100	701	700	751	522	613	634		717.333	589.667							3	3	3	3	3	3
	Q05816	Fatty acid-binding protein 5	FABP5_MOUSE	Fabp5	356677	362262	401580	391171	412235	342729		373506	382045			mito protein domain				16	14	13	14	14	14
	Q61160	FAS-associated death domain protein	FADD_MOUSE	Fadd	6777	6691	5978	6085	6231	6183		6482	6166.33							4	4	4	4	4	4
	Q920L1	Acyl-CoA (8-3)-desaturase	FADS1_MOUSE	Fads1	1063	1072	896	760	796	880		1010.33	812			mito protein domain, coexpression				3	3	3	3	3	3
	Q9Z0R9	Acyl-CoA 6-desaturase	FADS2_MOUSE	Fads2	8185	7364	6398	3521	6605	6771		7315.67	5632.33			mito protein domain, coexpression				8	8	8	8	8	8
	P54731	FAS-associated factor 1	FAF1_MOUSE	Faf1	26759	25762	24315	21026	21986	21109		25612	21373.7			coexpression				16	17	17	16	17	16
	Q3TDN2	FAS-associated factor 2	FAF2_MOUSE	Faf2	32495	28805	25392	17091	24776	25058		28897.3	22308.3			mito protein domain				15	15	14	14	14	15
	P35505	Fumarylacetoacetase	FAAA_MOUSE	Fah	4780	4078	4169	705	2508	2570		4342.33	1927.67			mito protein domain, coexpression				9	9	9	4	8	7
	A0A0R4J094	Fumarylacetoacetate hydrolase domain-containing 2A	A0A0R4J094_MOUSE	Fahd2a	2304	2735	2451	2494	2365	2291		2496.67	2383.33							4	4	4	4	4	4
	Q9WUD8	Fas apoptotic inhibitory molecule 1	FAIM1_MOUSE	Faim	40987	38041	34232	25959	28559	28312		37753.3	27610							8	8	8	8	8	8
	Q78T81	Protein FAM102A	F102A_MOUSE	Fam102a	4749	3852	4120	3414	3846	3703		4240.33	3654.33							6	6	7	7	7	7
	Q3TGF2	Protein FAM107B	F107B_MOUSE	Fam107b	446701	431218	472976	350043	395639	392267		450298	379316							16	15	15	15	15	15
	Q9D2L9	Protein FAM111A	F111A_MOUSE	Fam111a	6526	5681	6181	5084	5335	4732		6129.33	5050.33			mito protein domain				11	10	11	11	11	11
	Q9D281	Protein Noxp20	NXP20_MOUSE	Fam114a1	846	632	580	421	490	479		686	463.333							2	2	2	2	2	2
	Q8VE88;Q8VE88-2	Protein FAM114A2;Isoform 2 of Protein FAM114A2	F1142_MOUSE	Fam114a2	20520	17243	12823	9948	13219	13354		16862	12173.7			coexpression				16	16	16	14	16	16
	Q91YN1	Protein FAM118A	F118A_MOUSE	Fam118a	1706	1459	1409	1099	1274	1021		1524.67	1131.33			induction				4	5	5	5	5	5
	Q8C569	Protein FAM118B	F118B_MOUSE	Fam118b	3934	4014	4742	4966	4789	4137		4230	4630.67							7	7	7	7	7	7
	Q6A0A9	Constitutive coactivator of PPAR-gamma-like protein 1	F120A_MOUSE	FAM120A	44554	41753	44965	34825	40700	39597		43757.3	38374							43	44	42	42	42	43
	Q6P9N1	Hyccin	HYCCI_MOUSE	Fam126a	8132	7953	7132	6343	7034	7684		7739	7020.33							8	8	8	8	8	8
	Q9CVI2;Q9CVI2-2	Protein FAM133B;Isoform 2 of Protein FAM133B	F133B_MOUSE	Fam133b	6927	7157	8035	8435	7975	7595		7373	8001.67							4	4	4	4	4	4
	Q9CR98	Protein FAM136A	F136A_MOUSE	Fam136a	33947	34128	38454	28873	31565	24589		35509.7	28342.3		MitoCarta3.0	APEX_IMS, mito protein domain+, MS/MS++	IMS			8	9	8	8	9	8
	Q8CDM8	Protein FAM160B1	F16B1_MOUSE	Fam160b1	6219	3384	2830	1999	2350	2592		4144.33	2313.67							8	8	8	8	8	8
	Q9D6U8	Protein FAM162A	F162A_MOUSE	Fam162a	89375	91439	94232	76410	83827	85960		91682	82065.7		MitoCarta3.0	APEX_IMS, APEX_matrix, targetP signal, induction, coexpression, MS/MS++	MIM			7	7	6	6	7	7
	Q8CHT6	Protein FAM169B	F169B_MOUSE	Fam169b	11752	10556	10861	10878	10694	9966		11056.3	10512.7							9	9	9	9	9	9
	Q3TNH5	Cotranscriptional regulator FAM172A	F172A_MOUSE	Fam172a	8384	8335	5072	4358	4664	6111		7263.67	5044.33							6	6	6	6	6	6
	Q8BR63	Protein FAM177A1	F177A_MOUSE	Fam177a1	18507	15454	16071	11160	13599	10500		16677.3	11753							7	7	7	7	7	7
	Q7TPD2	Protein FAM185A	F185A_MOUSE	Fam185a	664	289	560	297	601	470		504.333	456		MitoCarta3.0	APEX_matrix, targetP signal, coexpression	Matrix			2	1	2	1	2	2
	P58468	Protein FAM207A	F207A_MOUSE	Fam207a	50450	49418	45397	38371	47211	45183		48421.7	43588.3			targetP signal				8	8	7	8	8	8
	Q8CID3	Pseudokinase FAM20A	FA20A_MOUSE	Fam20a	2342	2177	1843	1035	1386	1464		2120.67	1295							7	7	7	5	6	7
	Q8VCS3	Glycosaminoglycan xylosylkinase	XYLK_MOUSE	Fam20b	1925	2832	2184	1618	1874	1810		2313.67	1767.33							4	4	4	4	4	4
	Q8BGY7	Protein FAM210A	F210A_MOUSE	Fam210a	10359	8658	8793	5955	7295	7260		9270	6836.67		MitoCarta3.0	GFP, targetP signal, induction, coexpression++, MS/MS	MIM			4	4	4	4	4	4
	Q8BYI8;Q8BYI8-2	Protein FAM234B;Isoform 2 of Protein FAM234B	F234B_MOUSE	Fam234b	616	475	386	295	332	369		492.333	332							2	2	2	2	2	2
	Q9CR80	Protein FAM32A	FA32A_MOUSE	Fam32a	5353	3040	3893	4251	4462	4327		4095.33	4346.67							2	1	2	2	2	2
	Q9D8T0	Protein FAM3A	FAM3A_MOUSE	Fam3a	14349	3193	14453	4877	14160	5370		10665	8135.67							3	3	3	3	3	3
	Q91VU0	Protein FAM3C	FAM3C_MOUSE	Fam3c	22704	25669	25160	20281	22615	21343		24511	21413							9	9	9	9	9	9
	Q9WV03	Protein FAM50A	FA50A_MOUSE	Fam50a	18608	19115	21017	18015	19625	18204		19580	18614.7							9	9	9	9	9	9
	Q922G2;Q922G2-2	Protein FAM76A;Isoform 2 of Protein FAM76A	FA76A_MOUSE	Fam76a	1603	1642	1816	1455	1647	1527		1687	1543							2	2	2	2	2	2
	Q80XP8	Protein FAM76B	FA76B_MOUSE	Fam76b	10852	11153	11118	10262	10492	10275		11041	10343							10	10	11	9	9	10
	Q3UVG3	Protein FAM91A1	F91A1_MOUSE	Fam91a1	8249	2157	3825	3321	4741	8169		4743.67	5410.33							9	10	10	10	10	10
	Q3TJZ6	Protein FAM98A	FA98A_MOUSE	Fam98a	12822	11329	12758	9009	10342	9878		12303	9743							8	8	8	8	8	8
	Q80VD1	Protein FAM98B	FA98B_MOUSE	Fam98b	81383	81168	84148	68756	75657	71577		82233	71996.7			yeast mito homolog				17	18	18	19	18	19
	E9PYD1	Family with sequence similarity 98, member C	E9PYD1_MOUSE	Fam98c	5976	4960	6068	4576	5857	4995		5668	5142.67							7	7	7	7	7	7
	Q9JL70	Fanconi anemia group A protein homolog	FANCA_MOUSE	Fanca	1092	638	556	490	666	580		762	578.667							3	3	3	3	3	3
	Q80V62	Fanconi anemia group D2 protein homolog	FACD2_MOUSE	Fancd2	4779	4260	3960	4051	3857	3606		4333	3838							24	23	24	24	24	23
	Q8K368	Fanconi anemia group I protein homolog	FANCI_MOUSE	Fanci	14927	12586	11909	12095	12471	12018		13140.7	12194.7							45	44	45	45	45	45
	Q922J9;Q922J9-4	Fatty acyl-CoA reductase 1;Isoform 4 of Fatty acyl-CoA reductase 1	FACR1_MOUSE	Far1	166829	133663	164982	112871	138293	134442		155158	128535			mito protein domain				25	25	24	24	24	25
	F8VPU2	FERM, ARHGEF and pleckstrin domain-containing protein 1	FARP1_MOUSE	Farp1	394	306	292	155	233	234		330.667	207.333			mito protein domain				4	4	4	4	4	4
	Q99M01	Phenylalanine--tRNA ligase, mitochondrial	SYFM_MOUSE	Fars2	1506	1341	718	836	1082	1022		1188.33	980		MitoCarta3.0	literature, APEX_matrix, targetP signal, yeast mito homolog+, Rickettsial homolog, mito protein domain, induction, coexpression, MS/MS	Matrix	Mitochondrial central dogma > Translation > mt-tRNA synthetases		3	3	3	3	3	3
	Q8C0C7	Phenylalanine--tRNA ligase alpha subunit	SYFA_MOUSE	Farsa	124587	132233	100772	78725	86888	104379		119197	89997.3			Rickettsial homolog, mito protein domain				25	24	24	24	25	25
	Q9WUA2	Phenylalanine--tRNA ligase beta subunit	SYFB_MOUSE	Farsb	201028	187605	191117	141325	162960	162228		193250	155504			Rickettsial homolog				34	34	33	34	34	34
	P19096	Fatty acid synthase	FAS_MOUSE	Fasn	584796	447375	419250	322554	495510	366235		483807	394766		MitoCarta3.0	yeast mito homolog, Rickettsial homolog, mito protein domain, coexpression	IMS	Metabolism > Lipid metabolism		135	137	129	129	132	128
	Q922E6	FAST kinase domain-containing protein 2, mitochondrial	FAKD2_MOUSE	Fastkd2	3926	3628	4393	3348	3825	3658		3982.33	3610.33		MitoCarta3.0	literature, APEX_matrix, targetP signal+, induction, coexpression, MS/MS	Matrix	Mitochondrial central dogma > mtRNA metabolism > mtRNA granules | Mitochondrial central dogma > mtRNA metabolism > Polycistronic mtRNA processing | Mitochondrial central dogma > mtRNA metabolism > mtRNA stability and decay | Mitochondrial central dogma > Translation > Mitochondrial ribosome assembly		7	7	7	7	7	7
	Q7TMV3	FAST kinase domain-containing protein 5, mitochondrial	FAKD5_MOUSE	Fastkd5	1145	563	516	497	617	562		741.333	558.667		MitoCarta3.0	APEX_matrix, targetP signal, coexpression	Matrix	Mitochondrial central dogma > mtRNA metabolism > mtRNA granules | Mitochondrial central dogma > mtRNA metabolism > Polycistronic mtRNA processing | Mitochondrial central dogma > mtRNA metabolism > mtRNA stability and decay		5	4	4	5	5	5
	P62862	40S ribosomal protein S30	RS30_MOUSE	Fau	1704881	1804366	1997958	1513162	1742864	1745191		1835735	1.66707e+06							5	5	5	5	5	5
	P35550	rRNA 2'-O-methyltransferase fibrillarin	FBRL_MOUSE	Fbl	764323	671442	620875	529096	574411	577071		685547	560193			mito protein domain				22	22	21	21	21	22
	Q08879	Fibulin-1	FBLN1_MOUSE	Fbln1	1260	1316	1500	1062	1210	1414		1358.67	1228.67							4	4	4	4	4	4
	E9PYR1;F8VQK6	F-box and leucine-rich repeat protein 18	E9PYR1_MOUSE;F8VQK6_MOUSE	Fbxl18	672	423	654	517	580	646		583	581			mito protein domain				3	2	3	3	3	3
	Q9CZV8;Q9CZV8-3;Q9CZV8-4	F-box/LRR-repeat protein 20;Isoform 3 of F-box/LRR-repeat protein 20;Isoform 2 of F-box/LRR-repeat protein 20	FXL20_MOUSE	Fbxl20	2190	1569	816	1121	1253	1040		1525	1138			mito protein domain				3	3	3	4	4	4
	Q9QXW0	F-box/LRR-repeat protein 6	FBXL6_MOUSE	Fbxl6	1696	1119	846	676	780	1494		1220.33	983.333			targetP signal, mito protein domain				5	5	4	4	4	5
	Q8CIG9	F-box/LRR-repeat protein 8	FBXL8_MOUSE	Fbxl8	6764	5574	5889	5196	5845	5878		6075.67	5639.67			mito protein domain				9	8	8	9	8	8
	Q78JE5	F-box only protein 22	FBX22_MOUSE	Fbxo22	19619	18053	17655	15202	16583	16553		18442.3	16112.7			mito protein domain				9	9	9	9	9	9
	Q8BIG4	F-box only protein 28	FBX28_MOUSE	Fbxo28	7287	7449	8273	6048	7101	6335		7669.67	6494.67			mito protein domain				9	9	9	9	9	9
	Q9DC63;Q9DC63-2;Q9DC63-3	F-box only protein 3;Isoform 2 of F-box only protein 3;Isoform 3 of F-box only protein 3	FBX3_MOUSE	Fbxo3	5172	4588	4772	4188	4545	3629		4844	4120.67			yeast mito homolog, mito protein domain, coexpression				8	8	8	8	8	6
	Q8BJL1	F-box only protein 30	FBX30_MOUSE	Fbxo30	1805	2137	1523	1149	1348	1341		1821.67	1279.33			mito protein domain				4	4	4	4	4	4
	Q8VE08	F-box only protein 33	FBX33_MOUSE	Fbxo33	321	255	165	202	186	157		247	181.667			targetP signal, mito protein domain				2	2	2	2	2	2
	Q8BMI0	F-box only protein 38	FBX38_MOUSE	Fbxo38	4425	2863	2774	2163	1040	1162		3354	1455			mito protein domain				9	7	9	9	9	9
	Q6PDJ6	F-box only protein 42	FBX42_MOUSE	Fbxo42	375	330	345	247	290	288		350	275			mito protein domain				2	2	2	2	2	2
	Q7TSG3	F-box only protein 5	FBX5_MOUSE	Fbxo5	2636	2254	2144	2102	2038	2014		2344.67	2051.33			targetP signal, mito protein domain				3	5	5	5	5	5
	Q9QZN4	F-box only protein 6	FBX6_MOUSE	Fbxo6	7505	7951	6316	4501	4952	3017		7257.33	4156.67			mito protein domain				7	6	7	7	6	4
	Q3U7U3	F-box only protein 7	FBX7_MOUSE	Fbxo7	2018	4146	3931	3507	4088	4327		3365	3974			mito protein domain				4	4	5	6	5	5
	Q8BK06;Q8BK06-2	F-box only protein 9;Isoform 2 of F-box only protein 9	FBX9_MOUSE	Fbxo9	107	63	231	93	205	173		133.667	157			mito protein domain				1	1	2	1	2	2
	Q5SRY7;Q5SRY7-2;Q5SRY7-3;Q5SRY7-4	F-box/WD repeat-containing protein 11;Isoform 2 of F-box/WD repeat-containing protein 11;Isoform 3 of F-box/WD repeat-containing protein 11;Isoform 4 of F-box/WD repeat-containing protein 11	FBW1B_MOUSE	Fbxw11	4300	3853	4251	3100	3431	3117		4134.67	3216			mito protein domain				8	8	8	8	8	8
	P20491	High affinity immunoglobulin epsilon receptor subunit gamma	FCERG_MOUSE	Fcer1g	11001	11291	12028	2776	7026	5653		11440	5151.67							3	3	3	3	3	3
	Q9CTH6	rRNA-processing protein FCF1 homolog	FCF1_MOUSE	Fcf1	20260	20175	24347	17431	20028	16963		21594	18140.7			mito protein domain				6	6	6	6	6	6
	Q8K285	F-BAR domain only protein 1	FCHO1_MOUSE	Fcho1	7213	7153	7795	5546	5697	6212		7387	5818.33							14	14	14	13	13	14
	P53798	Squalene synthase	FDFT_MOUSE	Fdft1	14634	13469	12705	6964	9251	9536		13602.7	8583.67			yeast mito homolog, mito protein domain				10	10	10	10	10	10
	Q920E5	Farnesyl pyrophosphate synthase	FPPS_MOUSE	Fdps	304915	304029	276001	161722	210669	214080		294982	195490		MitoCarta3.0	Rickettsial homolog, mito protein domain, MS/MS+	MIM	Metabolism > Lipid metabolism > Cholesterol-associated		20	21	18	20	20	21
	P46656	Adrenodoxin, mitochondrial	ADX_MOUSE	Fdx1	15527	19148	16362	10194	14298	15535		17012.3	13342.3		MitoCarta3.0	literature, APEX_matrix, targetP signal+, yeast mito homolog+, Rickettsial homolog, mito protein domain, induction, coexpression, MS/MS+	Matrix	Metabolism > Lipid metabolism > Cholesterol, bile acid, steroid synthesis | Metabolism > Metals and cofactors > Heme synthesis and processing | Metabolism > Metals and cofactors > Fe-S cluster biosynthesis | Metabolism > Metals and cofactors > Fe-S-containing proteins | Metabolism > Vitamin metabolism > Vitamin D metabolism		5	5	4	5	4	5
	Q9CPW2	Ferredoxin-2, mitochondrial	FDX2_MOUSE	Fdx2	10675	8123	8667	5874	7660	6689		9155	6741		MitoCarta3.0	APEX_matrix, targetP signal+, yeast mito homolog+, Rickettsial homolog, mito protein domain, coexpression, MS/MS	Matrix	Metabolism > Metals and cofactors > Heme synthesis and processing | Metabolism > Metals and cofactors > Fe-S cluster biosynthesis | Metabolism > Metals and cofactors > Fe-S-containing proteins		4	4	4	4	4	4
	Q61578	NADPH:adrenodoxin oxidoreductase, mitochondrial	ADRO_MOUSE	Fdxr	91715	79359	34854	32568	63213	42228		68642.7	46003		MitoCarta3.0	literature, APEX_matrix, targetP signal, yeast mito homolog++, coexpression, MS/MS++	Matrix	Metabolism > Lipid metabolism > Cholesterol, bile acid, steroid synthesis | Metabolism > Metals and cofactors > Heme synthesis and processing | Metabolism > Metals and cofactors > Fe-S cluster biosynthesis | Metabolism > Vitamin metabolism > Vitamin D metabolism		20	19	20	21	21	21
	Q9Z2G0	Protein fem-1 homolog B	FEM1B_MOUSE	Fem1b	736	570	448	399	415	367		584.667	393.667			Rickettsial homolog, mito protein domain				3	3	3	3	3	3
	P39749	Flap endonuclease 1	FEN1_MOUSE	Fen1	157340	152007	166092	138433	154147	150278		158480	147619							15	15	15	15	15	15
	Q8K1B8	Fermitin family homolog 3	URP2_MOUSE	Fermt3	317821	313110	372423	290612	326809	319801		334451	312407			mito protein domain				43	42	40	40	42	42
	Q8K0E8	Fibrinogen beta chain	FIBB_MOUSE	Fgb	8501	9700	13541	7201	9101	9411		10580.7	8571							4	4	4	4	4	4
	O88842	FYVE, RhoGEF and PH domain-containing protein 3	FGD3_MOUSE	Fgd3	13844	14832	14518	9704	12542	14248		14398	12164.7							12	13	14	13	14	12
	Q9CRA9;Q9CRA9-2	FGFR1 oncogene partner 2 homolog;Isoform 2 of FGFR1 oncogene partner 2 homolog	FGOP2_MOUSE	Fgfr1op2	16383	15401	15128	11924	13782	13366		15637.3	13024							9	9	7	9	8	10
	Q8VCM7	Fibrinogen gamma chain	FIBG_MOUSE	Fgg	7204	7039	10318	6440	6268	8341		8187	7016.33							5	4	4	4	4	4
	P12804	Fibroleukin	FGL2_MOUSE	Fgl2	13931	13392	12839	7363	10558	11074		13387.3	9665							12	11	11	12	12	12
	P14234	Tyrosine-protein kinase Fgr	FGR_MOUSE	Fgr	1540	1233	1404	1051	1075	902		1392.33	1009.33			mito protein domain				3	3	3	3	3	3
	P97807;P97807-2	Fumarate hydratase, mitochondrial;Isoform Cytoplasmic of Fumarate hydratase, mitochondrial	FUMH_MOUSE	Fh	210377	212516	194265	164072	188536	186096		205719	179568		MitoCarta3.0	literature, APEX_matrix, targetP signal+, yeast mito homolog, Rickettsial homolog, mito protein domain, induction, coexpression++, MS/MS++	Matrix	Metabolism > Carbohydrate metabolism > TCA cycle		25	28	25	23	25	25
	P97447	Four and a half LIM domains protein 1	FHL1_MOUSE	Fhl1	1474	3227	1237	1472	1864	2032		1979.33	1789.33							2	2	2	2	2	2
	O70433	Four and a half LIM domains protein 2	FHL2_MOUSE	Fhl2	13420	11634	15978	8248	10726	10233		13677.3	9735.67			yeast mito homolog				12	11	12	10	10	12
	Q9R059	Four and a half LIM domains protein 3	FHL3_MOUSE	Fhl3	23098	21822	24816	14952	22723	23810		23245.3	20495			yeast mito homolog				10	9	9	9	10	10
	Q6P9Q4	FH1/FH2 domain-containing protein 1	FHOD1_MOUSE	Fhod1	10408	9977	10958	8760	9328	9302		10447.7	9130							27	26	26	27	26	26
	Q9JI19	Acidic fibroblast growth factor intracellular-binding protein	FIBP_MOUSE	Fibp	4889	13476	14039	11258	8932	12623		10801.3	10937.7							5	6	6	7	7	7
	Q91WF7	Polyphosphoinositide phosphatase	FIG4_MOUSE	Fig4	2315	2462	2193	1573	1766	1848		2323.33	1729							4	4	6	4	5	6
	Q6P6L0;Q6P6L0-3	Filamin A-interacting protein 1-like;Isoform 3 of Filamin A-interacting protein 1-like	FIL1L_MOUSE	Filip1l	345	357	329	246	278	272		343.667	265.333							4	4	4	4	4	4
	Q9D824;Q9D824-2;Q9D824-3	Pre-mRNA 3'-end-processing factor FIP1;Isoform 2 of Pre-mRNA 3'-end-processing factor FIP1;Isoform 3 of Pre-mRNA 3'-end-processing factor FIP1	FIP1_MOUSE	Fip1l1	53171	63918	62976	46190	58371	52963		60021.7	52508							13	13	13	13	13	13
	Q9CQ92	Mitochondrial fission 1 protein	FIS1_MOUSE	Fis1	129367	192110	87433	85348	72909	130203		136303	96153.3		MitoCarta3.0	literature, yeast mito homolog++, mito protein domain+	MOM	Mitochondrial dynamics and surveillance > Fission		8	9	7	8	7	7
	Q9WTJ4	Flt3-interacting zinc finger protein 1	FIZ1_MOUSE	Fiz1	1029	852	1227	1379	1355	1456		1036	1396.67							3	3	3	4	4	4
	Q6P9Q6	FK506-binding protein 15	FKB15_MOUSE	Fkbp15	11765	11336	11095	8245	9399	9348		11398.7	8997.33			mito protein domain				26	26	24	24	23	25
	P26883	Peptidyl-prolyl cis-trans isomerase FKBP1A	FKB1A_MOUSE	Fkbp1a	1024784	1060123	973732	653380	877649	884062		1.01955e+06	805030			yeast mito homolog, mito protein domain				6	6	6	6	6	6
	P45878	Peptidyl-prolyl cis-trans isomerase FKBP2	FKBP2_MOUSE	Fkbp2	213233	218602	248048	186065	216140	214611		226628	205605			mito protein domain, coexpression				11	11	11	11	11	11
	Q62446	Peptidyl-prolyl cis-trans isomerase FKBP3	FKBP3_MOUSE	Fkbp3	406060	425356	436224	345265	389558	392131		422547	375651			yeast mito homolog, mito protein domain, coexpression				16	18	15	15	16	16
	P30416	Peptidyl-prolyl cis-trans isomerase FKBP4	FKBP4_MOUSE	Fkbp4	399972	404832	409380	357909	392546	369704		404728	373386			yeast mito homolog, mito protein domain, coexpression				42	43	41	43	43	43
	Q64378	Peptidyl-prolyl cis-trans isomerase FKBP5	FKBP5_MOUSE	Fkbp5	164823	177716	191129	129910	160985	151074		177889	147323			yeast mito homolog, mito protein domain				34	36	32	32	33	34
	O35465	Peptidyl-prolyl cis-trans isomerase FKBP8	FKBP8_MOUSE	Fkbp8	88569	90159	99598	67380	87628	80475		92775.3	78494.3		MitoCarta3.0	literature, yeast mito homolog, mito protein domain, coexpression, MS/MS	MOM	Mitochondrial dynamics and surveillance > Organelle contact sites | Mitochondrial dynamics and surveillance > Mitophagy | Mitochondrial dynamics and surveillance > Autophagy		15	14	14	13	13	13
	Q8R123;Q8R123-2	FAD synthase;Isoform 2 of FAD synthase	FAD1_MOUSE	Flad1	14842	12897	13518	9488	11299	10597		13752.3	10461.3		MitoCarta3.0	APEX_matrix, mito protein domain, induction, coexpression	Matrix	Metabolism > Vitamin metabolism > Vitamin B2 metabolism		13	14	14	14	14	13
	P26323	Friend leukemia integration 1 transcription factor	FLI1_MOUSE	Fli1	55099	84411	82799	63045	76231	68526		74103	69267.3							18	19	18	18	18	18
	Q9JJ28	Protein flightless-1 homolog	FLII_MOUSE	Flii	63644	62126	61543	45237	52318	49570		62437.7	49041.7			yeast mito homolog, mito protein domain				55	56	55	56	56	54
	Q8BTM8	Filamin-A	FLNA_MOUSE	Flna	157523	183680	194371	147330	163222	121206		178525	143919			MS/MS				145	147	140	139	141	143
	Q80X90	Filamin-B	FLNB_MOUSE	Flnb	11105	5108	8520	8964	9716	8575		8244.33	9085							67	65	68	71	68	67
	O08917	Flotillin-1	FLOT1_MOUSE	Flot1	17394	14707	13570	12570	15044	14329		15223.7	13981			Rickettsial homolog, mito protein domain, MS/MS				16	16	15	16	17	17
	Q60634	Flotillin-2	FLOT2_MOUSE	Flot2	21860	17997	18220	16895	18669	17423		19359	17662.3			mito protein domain				16	17	17	18	18	17
	Q9JL26	Formin-like protein 1	FMNL1_MOUSE	Fmnl1	160204	146526	157224	116720	135735	127166		154651	126540							61	61	60	59	60	61
	P35922;P35922-2;P35922-3	Synaptic functional regulator FMR1;Isoform 2 of Synaptic functional regulator FMR1;Isoform 3 of Synaptic functional regulator FMR1	FMR1_MOUSE	Fmr1	22363	23182	20912	18919	20495	20791		22152.3	20068.3							19	18	18	19	18	19
	P11276	Fibronectin	FINC_MOUSE	Fn1	14715	17302	22753	14759	14663	21436		18256.7	16952.7							28	28	29	28	28	29
	Q8K274	Ketosamine-3-kinase	KT3K_MOUSE	Fn3krp	3409	3200	2523	2136	2299	2053		3044	2162.67			mito protein domain				3	4	2	3	3	3
	Q80TY0-2	Isoform 2 of Formin-binding protein 1	FNBP1_MOUSE	Fnbp1	114693	120884	126373	103861	116543	107007		120650	109137			mito protein domain				34	34	31	30	32	34
	Q6ZQ03	Formin-binding protein 4	FNBP4_MOUSE	Fnbp4	7542	7502	7441	6700	7571	7125		7495	7132			mito protein domain				18	19	19	18	19	18
	Q8BX90	Fibronectin type-III domain-containing protein 3A	FND3A_MOUSE	Fndc3a	2395	2570	2332	1020	1572	1440		2432.33	1344							7	9	8	7	9	8
	Q61239	Protein farnesyltransferase/geranylgeranyltransferase type-1 subunit alpha	FNTA_MOUSE	Fnta	28183	32135	22139	19202	19128	23972		27485.7	20767.3							17	16	15	15	13	16
	Q8K2I1	Protein farnesyltransferase subunit beta	FNTB_MOUSE	Fntb	6676	5952	5238	4318	4947	5131		5955.33	4798.67							6	6	6	6	6	6
	A2AKG8	Focadhesin	FOCAD_MOUSE	Focad	6067	7572	3631	2433	3342	3000		5756.67	2925			coexpression				21	21	21	21	21	21
	P47930	Fos-related antigen 2	FOSL2_MOUSE	Fosl2	11249	12791	10817	4694	7301	8944		11619	6979.67			mito protein domain				7	7	7	6	6	7
	Q8BUR3;Q8BUR3-2	Forkhead box protein J3;Isoform 2 of Forkhead box protein J3	FOXJ3_MOUSE	Foxj3	30	0	564	428	478	523		198	476.333			MS/MS				2	Filtered	2	2	1	1
	P42128	Forkhead box protein K1	FOXK1_MOUSE	Foxk1	17935	18285	19127	14917	17652	17127		18449	16565.3			mito protein domain				15	15	15	15	15	15
	Q3UCQ1	Forkhead box protein K2	FOXK2_MOUSE	Foxk2	4122	5215	5179	4229	4731	5148		4838.67	4702.67			mito protein domain				9	11	11	10	11	12
	Q9R1E0	Forkhead box protein O1	FOXO1_MOUSE	Foxo1	2542	4005	3721	2481	3289	3177		3422.67	2982.33							6	9	9	8	9	10
	P58462	Forkhead box protein P1	FOXP1_MOUSE	Foxp1	16130	15066	12147	14574	13562	13279		14447.7	13805							17	16	16	17	17	16
	P48760;P48760-2;P48760-3;P48760-4;P48760-5	Folylpolyglutamate synthase, mitochondrial;Isoform 2 of Folylpolyglutamate synthase, mitochondrial;Isoform 3 of Folylpolyglutamate synthase, mitochondrial;Isoform 4 of Folylpolyglutamate synthase, mitochondrial;Isoform 5 of Folylpolyglutamate synthase, mitochondrial	FOLC_MOUSE	Fpgs	774	281	467	378	472	506		507.333	452		MitoCarta3.0	APEX_matrix, GFP, targetP signal, yeast mito homolog, Rickettsial homolog	Matrix	Metabolism > Vitamin metabolism > Folate and 1-C metabolism		2	2	2	2	2	2
	Q8BP78	Protein FRA10AC1 homolog	F10C1_MOUSE	Fra10ac1	9115	8377	7981	6536	7891	7909		8491	7445.33			coexpression				5	5	4	5	4	5
	P97376	Protein FRG1	FRG1_MOUSE	Frg1	65220	60013	64941	67186	65181	58781		63391.3	63716							14	14	14	14	14	14
	Q3UFK8	FERM domain-containing protein 8	FRMD8_MOUSE	Frmd8	24364	15289	16073	11568	16146	16571		18575.3	14761.7							14	13	13	13	14	14
	F8VQ05	FRY-like transcription coactivator	F8VQ05_MOUSE	Fryl	13220	12441	10789	7012	9310	7557		12150	7959.67			yeast mito homolog				63	61	62	60	62	62
	Q8BYN5;Q8BYN5-2	FSD1-like protein;Isoform 2 of FSD1-like protein	FSD1L_MOUSE	Fsd1l	0	0	37	313	145	41		12.3333	166.333			mito protein domain				Filtered	Filtered	1	3	3	1
	P09528	Ferritin heavy chain	FRIH_MOUSE	Fth1	143937	134136	144533	64996	95034	98770		140869	86266.7		MitoCarta3.0	mito protein domain, MS/MS++	unknown	Metabolism > Metals and cofactors > Iron homeostasis		15	15	13	13	13	14
	P29391	Ferritin light chain 1	FRIL1_MOUSE	Ftl1	106453	105359	116538	59990	79316	84150		109450	74485.3							9	9	9	9	8	9
	Q8BGW1	Alpha-ketoglutarate-dependent dioxygenase FTO	FTO_MOUSE	Fto	13286	12524	12376	10590	11498	10571		12728.7	10886.3			coexpression				12	13	13	13	13	13
	Q8CBC7;Q8JZY1	Putative tRNA (cytidine(32)/guanosine(34)-2'-O)-methyltransferase	Q8CBC7_MOUSE;Q8JZY1_MOUSE	Ftsj1	16270	13470	14257	10797	12970	12308		14665.7	12025			Rickettsial homolog, mito protein domain, coexpression				9	8	8	8	8	9
	Q9DBE9	pre-rRNA 2'-O-ribose RNA methyltransferase FTSJ3	SPB1_MOUSE	Ftsj3	44344	45142	49568	37481	41249	39299		46351.3	39343			Rickettsial homolog, mito protein domain				32	31	32	31	32	31
	Q91WJ8	Far upstream element-binding protein 1	FUBP1_MOUSE	Fubp1	225367	228314	256525	211048	226903	218731		236735	218894			mito protein domain				32	31	30	29	30	30
	A2AJ72;Q3TIX6	Far upstream element (FUSE)-binding protein 3	A2AJ72_MOUSE;Q3TIX6_MOUSE	Fubp3	27450	27966	12904	20273	25567	13311		22773.3	19717							17	17	15	17	17	16
	Q99LJ1	Tissue alpha-L-fucosidase	FUCO_MOUSE	Fuca1	4396	3605	4176	4198	3818	4445		4059	4153.67			MS/MS				3	3	4	4	4	4
	Q99KR8	Plasma alpha-L-fucosidase	FUCO2_MOUSE	Fuca2	1630	1953	1447	3025	1450	1460		1676.67	1978.33							4	6	6	6	6	6
	Q9D6K8	FUN14 domain-containing protein 2	FUND2_MOUSE	Fundc2	23568	25414	24404	26557	24952	22493		24462	24667.3		MitoCarta3.0	mito protein domain+, MS/MS++	MOM	Mitochondrial dynamics and surveillance > Organelle contact sites | Signaling		7	7	6	7	7	7
	P23188	Furin	FURIN_MOUSE	Furin	394	603	526	138	165	0		507.667	101							5	5	5	2	3	Filtered
	P56959	RNA-binding protein FUS	FUS_MOUSE	Fus	293296	314261	305529	254459	289966	290865		304362	278430			mito protein domain				12	12	11	10	10	11
	Q9WTS2	Alpha-(1,6)-fucosyltransferase	FUT8_MOUSE	Fut8	7018	6963	7122	7369	7632	7696		7034.33	7565.67			mito protein domain				11	10	11	11	11	11
	O35943	Frataxin, mitochondrial	FRDA_MOUSE	Fxn	9289	10453	8262	7571	6797	6670		9334.67	7012.67		MitoCarta3.0	literature, APEX_matrix, targetP signal+, yeast mito homolog++, Rickettsial homolog, mito protein domain, coexpression, MS/MS+	Matrix	Metabolism > Metals and cofactors > Fe-S cluster biosynthesis		3	3	3	3	2	3
	Q61584;Q61584-3;Q61584-4	Fragile X mental retardation syndrome-related protein 1;Isoform B of Fragile X mental retardation syndrome-related protein 1;Isoform C of Fragile X mental retardation syndrome-related protein 1	FXR1_MOUSE	Fxr1	56641	51942	50342	38629	45327	44925		52975	42960.3			mito protein domain				30	29	25	25	26	28
	Q9WVR4	Fragile X mental retardation syndrome-related protein 2	FXR2_MOUSE	Fxr2	5392	5438	6337	4712	5459	4800		5722.33	4990.33							9	9	9	9	9	10
	P97808	FXYD domain-containing ion transport regulator 5	FXYD5_MOUSE	Fxyd5	21253	21905	22404	23853	26064	24195		21854	24704							6	6	7	7	7	7
	O35601	FYN-binding protein 1	FYB1_MOUSE	Fyb1	27283	30212	24459	17927	22027	23869		27318	21274.3			mito protein domain				31	30	28	29	30	30
	Q8VDC1	FYVE and coiled-coil domain-containing protein 1	FYCO1_MOUSE	Fyco1	515	430	171	250	139	259		372	216			coexpression				3	3	3	3	2	3
	P39688-2	Isoform 2 of Tyrosine-protein kinase Fyn	FYN_MOUSE	Fyn	36176	35933	35271	30327	30454	31121		35793.3	30634			mito protein domain				23	23	22	24	22	24
	Q91Z49;Q91Z49-2	UAP56-interacting factor;Isoform 2 of UAP56-interacting factor	UIF_MOUSE	Fyttd1	3615	3244	3414	2938	3787	3668		3424.33	3464.33			targetP signal				2	3	3	3	3	3
	P97855	Ras GTPase-activating protein-binding protein 1	G3BP1_MOUSE	G3bp1	482097	460499	445902	359453	408572	403029		462833	390351			mito protein domain				23	24	23	23	23	22
	P97379	Ras GTPase-activating protein-binding protein 2	G3BP2_MOUSE	G3bp2	107692	114169	110146	81045	95028	94719		110669	90264			mito protein domain				16	16	16	16	16	16
	Q6NSQ9	Glucose-6-phosphatase 3	G6PC3_MOUSE	G6pc3	3492	3898	3862	3741	4814	1965		3750.67	3506.67							3	3	3	3	3	3
	Q00612	Glucose-6-phosphate 1-dehydrogenase X	G6PD1_MOUSE	G6pdx	119987	119374	115181	86832	102164	102208		118181	97068			MS/MS				32	32	32	32	32	32
	P70699	Lysosomal alpha-glucosidase	LYAG_MOUSE	Gaa	35495	6617	7951	5944	7356	6069		16687.7	6456.33			yeast mito homolog, MS/MS				14	14	13	13	14	14
	Q9DCD6	Gamma-aminobutyric acid receptor-associated protein	GBRAP_MOUSE	Gabarap	64015	62236	70173	49192	59044	54763		65474.7	54333							3	3	3	3	3	3
	P60521	Gamma-aminobutyric acid receptor-associated protein-like 2	GBRL2_MOUSE	Gabarapl2	87699	95690	86536	64121	83015	82763		89975	76633			MS/MS				5	5	5	5	5	5
	Q00422	GA-binding protein alpha chain	GABPA_MOUSE	Gabpa	41116	38592	39034	35270	35166	30905		39580.7	33780.3							14	15	14	14	15	15
	Q00420;Q00420-3	GA-binding protein subunit beta-1;Isoform 3 of GA-binding protein subunit beta-1	GABP1_MOUSE	Gabpb1	23672	28830	27208	32092	30727	24665		26570	29161.3			Rickettsial homolog, mito protein domain				4	4	4	4	4	4
	P81069	GA-binding protein subunit beta-2	GABP2_MOUSE	Gabpb2	10087	8774	8533	8122	9003	9264		9131.33	8796.33			Rickettsial homolog, mito protein domain				9	9	8	9	9	9
	Q9CR59	Growth arrest and DNA damage-inducible proteins-interacting protein 1	G45IP_MOUSE	Gadd45gip1	10019	10784	14229	12669	12795	12226		11677.3	12563.3		MitoCarta3.0	APEX_matrix, GFP, targetP signal+, coexpression+, MS/MS++	Matrix	Mitochondrial central dogma > Translation > Mitochondrial ribosome		5	5	6	6	6	5
	Q99KY4;Q99KY4-2	Cyclin-G-associated kinase;Isoform 2 of Cyclin-G-associated kinase	GAK_MOUSE	Gak	21294	20397	21898	16686	19165	18733		21196.3	18194.7			mito protein domain				39	40	41	39	40	40
	Q8R059	UDP-glucose 4-epimerase	GALE_MOUSE	Gale	27484	24348	23638	17380	21120	21721		25156.7	20073.7			mito protein domain				13	13	13	13	13	13
	Q9R0N0	Galactokinase	GALK1_MOUSE	Galk1	201970	202053	208843	166242	190532	180591		204289	179122			mito protein domain, coexpression				18	19	18	18	18	18
	Q68FH4	N-acetylgalactosamine kinase	GALK2_MOUSE	Galk2	20177	17306	18709	13747	16797	15948		18730.7	15497.3			mito protein domain				15	15	14	14	15	15
	Q571E4	N-acetylgalactosamine-6-sulfatase	GALNS_MOUSE	Galns	13603	12244	12739	10058	11430	10822		12862	10770							10	10	10	10	10	10
	O08912	Polypeptide N-acetylgalactosaminyltransferase 1	GALT1_MOUSE	Galnt1	15014	13570	13305	9080	11819	11470		13963	10789.7							14	14	14	14	15	15
	Q8BGT9	Polypeptide N-acetylgalactosaminyltransferase 12	GLT12_MOUSE	Galnt12	2224	2648	2440	2015	2304	2098		2437.33	2139							5	5	4	4	5	5
	Q6PB93	Polypeptide N-acetylgalactosaminyltransferase 2	GALT2_MOUSE	Galnt2	16906	14877	15106	10551	13518	12223		15629.7	12097.3							15	16	15	15	15	16
	P70419	Polypeptide N-acetylgalactosaminyltransferase 3	GALT3_MOUSE	Galnt3	4548	4206	3566	1685	2962	2601		4106.67	2416							8	9	8	8	8	8
	Q8C7U7	Polypeptide N-acetylgalactosaminyltransferase 6	GALT6_MOUSE	Galnt6	5299	6080	7822	2700	6755	4212		6400.33	4555.67							11	11	11	11	11	11
	Q80VA0	N-acetylgalactosaminyltransferase 7	GALT7_MOUSE	Galnt7	23023	23799	21775	18115	19442	21121		22865.7	19559.3							25	25	25	25	25	25
	Q03249	Galactose-1-phosphate uridylyltransferase	GALT_MOUSE	Galt	3682	2371	2990	2222	2721	2179		3014.33	2374							7	5	7	6	7	6
	Q8CA72	Gigaxonin	GAN_MOUSE	Gan	1519	1813	1178	972	1305	1201		1503.33	1159.33							5	5	4	6	6	5
	Q8BHN3	Neutral alpha-glucosidase AB	GANAB_MOUSE	Ganab	228803	220798	197710	154134	178239	181644		215770	171339			yeast mito homolog				52	54	51	51	52	52
	P16858	Glyceraldehyde-3-phosphate dehydrogenase	G3P_MOUSE	Gapdh	20809058	19613691	18008238	12540910	16033641	16435258		1.9477e+07	1.50033e+07		mito-interacting	targetP signal, yeast mito homolog, Rickettsial homolog				32	32	30	29	33	33
	Q6PAR5	GTPase-activating protein and VPS9 domain-containing protein 1	GAPD1_MOUSE	Gapvd1	30651	28508	35817	27756	28229	27186		31658.7	27723.7							41	41	41	41	39	39
	Q9CY66;Q9CY66-2;Q9CY66-3	H/ACA ribonucleoprotein complex subunit 1;Isoform 2 of H/ACA ribonucleoprotein complex subunit 1;Isoform 3 of H/ACA ribonucleoprotein complex subunit 1	GAR1_MOUSE	Gar1	141664	133499	148310	126319	135134	124283		141158	128579							8	8	8	7	8	8
	Q9CZD3	Glycine--tRNA ligase	GARS_MOUSE	Gars1	327317	308008	326438	220305	270499	270680		320588	253828		MitoCarta3.0	targetP signal+, yeast mito homolog, mito protein domain, induction	Matrix	Mitochondrial central dogma > Translation > mt-tRNA synthetases		44	43	40	38	39	42
	Q64737	Trifunctional purine biosynthetic protein adenosine-3	PUR2_MOUSE	Gart	267199	264112	273274	210580	240804	234503		268195	228629			mito protein domain				56	56	52	53	50	54
	P23772	Trans-acting T-cell-specific transcription factor GATA-3	GATA3_MOUSE	Gata3	300	291	328	267	315	278		306.333	286.667			induction				3	3	3	3	3	3
	Q920S3	GATA zinc finger domain-containing protein 1	GATD1_MOUSE	Gatad1	2034	1955	2047	2012	2045	1884		2012	1980.33			coexpression				3	3	3	3	3	3
	Q8CHY6	Transcriptional repressor p66 alpha	P66A_MOUSE	Gatad2a	55585	60283	68951	54407	59186	60464		61606.3	58019							27	28	27	27	27	27
	Q8VHR5	Transcriptional repressor p66-beta	P66B_MOUSE	Gatad2b	33874	30404	38860	37217	37297	32645		34379.3	35719.7							22	22	22	22	22	22
	Q8BFQ8	Glutamine amidotransferase-like class 1 domain-containing protein 1	GALD1_MOUSE	Gatd1	23323	20546	22734	17406	20589	20176		22201	19390.3			mito protein domain				4	4	4	4	4	4
	Q9D172	Glutamine amidotransferase-like class 1 domain-containing protein 3A, mitochondrial	GAL3A_MOUSE	Gatd3a	45261	46469	43597	42902	45000	43433		45109	43778.3		MitoCarta3.0	APEX_matrix, targetP signal+, mito protein domain, induction, coexpression++, MS/MS++	Matrix			13	11	10	10	11	10
	Q9D964	Glycine amidinotransferase, mitochondrial	GATM_MOUSE	Gatm	1110	476	1107	589	957	474		897.667	673.333		MitoCarta3.0	literature, targetP signal, mito protein domain+, MS/MS++	Matrix	Metabolism > Nucleotide metabolism > Creatine metabolism		2	1	2	2	2	1
	P17439	Lysosomal acid glucosylceramidase	GLCM_MOUSE	Gba	14310	15666	15880	10755	14072	12971		15285.3	12599.3			MS/MS				11	11	11	11	11	11
	Q69ZF3	Non-lysosomal glucosylceramidase	GBA2_MOUSE	Gba2	1035	969	955	747	911	787		986.333	815							5	5	5	5	5	5
	Q9D6Y9	1,4-alpha-glucan-branching enzyme	GLGB_MOUSE	Gbe1	2147	2377	2985	2314	2736	2996		2503	2682			mito protein domain, coexpression				11	10	11	10	11	12
	Q6A099;Q6DFZ1	MKIAA0248 protein (Fragment);Golgi-specific brefeldin A-resistance factor 1	Q6A099_MOUSE;Q6DFZ1_MOUSE	Gbf1	13669	12246	11989	8860	10421	10316		12634.7	9865.67							42	43	40	42	42	43
	Q9Z0E6	Guanylate-binding protein 2	GBP2_MOUSE	Gbp2	67477	58942	58640	62581	58012	57486		61686.3	59359.7							30	29	29	29	28	28
	Q61107	Guanylate-binding protein 4	GBP4_MOUSE	Gbp4	57615	54400	52440	43145	48800	52770		54818.3	48238.3							30	30	29	29	28	29
	Q8CFB4	Guanylate-binding protein 5	GBP5_MOUSE	Gbp5	7279	6780	5678	5874	5647	7029		6579	6183.33							10	12	12	11	11	10
	A0A0G2JDV3	Guanylate-binding protein 6	A0A0G2JDV3_MOUSE	Gbp6	78636	62063	60934	49188	58055	61609		67211	56284							31	32	30	31	31	33
	Q91Z40	Gbp6 protein	Q91Z40_MOUSE	Gbp7	144639	151582	149477	111724	131992	133953		148566	125890							39	39	38	37	39	39
	O88986	2-amino-3-ketobutyrate coenzyme A ligase, mitochondrial	KBL_MOUSE	Gcat	29540	28554	26231	20953	24416	27001		28108.3	24123.3		MitoCarta3.0	literature, targetP signal, yeast mito homolog+, Rickettsial homolog, mito protein domain, MS/MS++	unknown	Metabolism > Amino acid metabolism > Glycine metabolism		15	15	14	14	14	14
	Q9D4H2	GRIP and coiled-coil domain-containing protein 1	GCC1_MOUSE	Gcc1	581	201	289	290	320	459		357	356.333							2	3	4	3	3	3
	Q8CHG3	GRIP and coiled-coil domain-containing protein 2	GCC2_MOUSE	Gcc2	2166	1909	1708	2359	2707	1792		1927.67	2286							17	18	18	19	19	19
	Q60759	Glutaryl-CoA dehydrogenase, mitochondrial	GCDH_MOUSE	Gcdh	9055	9432	8113	6116	8850	8322		8866.67	7762.67		MitoCarta3.0	literature, APEX_matrix, targetP signal+, mito protein domain+, coexpression, MS/MS++	Matrix	Metabolism > Amino acid metabolism > Lysine metabolism		10	10	10	10	10	10
	Q8BKT3	GC-rich sequence DNA-binding factor 2	GCFC2_MOUSE	Gcfc2	2958	2637	2438	2302	2490	2176		2677.67	2322.67							7	7	9	9	9	9
	P97494	Glutamate--cysteine ligase catalytic subunit	GSH1_MOUSE	Gclc	9598	8447	9913	8635	9323	8405		9319.33	8787.67			coexpression				12	12	12	12	12	12
	O09172	Glutamate--cysteine ligase regulatory subunit	GSH0_MOUSE	Gclm	112425	113991	129103	98807	114097	124001		118506	112302			targetP signal, coexpression				10	8	9	9	9	10
	E9PVA8	eIF-2-alpha kinase activator GCN1	GCN1_MOUSE	Gcn1	62475	57887	56253	40259	48285	48456		58871.7	45666.7			yeast mito homolog				129	133	131	131	130	133
	Q91WK5	Glycine cleavage system H protein, mitochondrial	GCSH_MOUSE	Gcsh	6593	8244	6773	3744	5752	5059		7203.33	4851.67		MitoCarta3.0	literature, APEX_matrix, targetP signal+, yeast mito homolog, mito protein domain+, MS/MS	Matrix	Metabolism > Lipid metabolism > Lipoate insertion | Metabolism > Amino acid metabolism > Glycine metabolism | Metabolism > Amino acid metabolism > Glycine cleavage system		2	2	2	2	2	2
	Q9JL56	Glycerophosphodiester phosphodiesterase 1	GDE1_MOUSE	Gde1	3048	3396	3444	2528	2895	2746		3296	2723			yeast mito homolog, mito protein domain				4	4	4	3	4	4
	P50396	Rab GDP dissociation inhibitor alpha	GDIA_MOUSE	Gdi1	18097	19212	20383	17155	18597	17065		19230.7	17605.7							14	15	14	15	15	15
	Q61598	Rab GDP dissociation inhibitor beta	GDIB_MOUSE	Gdi2	938850	918218	922046	720573	811048	781179		926371	770933							50	50	49	50	48	49
	Q3TLS3	GDP-D-glucose phosphorylase 1	GDPP1_MOUSE	Gdpgp1	3616	2908	2007	1237	1654	1616		2843.67	1502.33							4	4	4	4	4	4
	P55041	GTP-binding protein GEM	GEM_MOUSE	Gem	16747	17339	13826	6360	9021	10350		15970.7	8577			mito protein domain				6	6	5	5	5	5
	Q9CQQ4	Gem-associated protein 2	GEMI2_MOUSE	Gemin2	14275	25273	12598	29022	10734	38988		17382	26248			coexpression				8	8	6	7	7	7
	Q6P6L6	Gem (Nuclear organelle) associated protein 4	Q6P6L6_MOUSE	Gemin4	12064	10999	10745	8081	9941	8568		11269.3	8863.33							23	23	22	23	24	23
	Q8BX17	Gem-associated protein 5	GEMI5_MOUSE	Gemin5	33220	31346	29874	22192	26426	25081		31480	24566.3			targetP signal, mito protein domain, coexpression				47	48	48	46	46	46
	Q9CX53	Gem-associated protein 6	GEMI6_MOUSE	Gemin6	9875	10174	8149	3897	4588	7920		9399.33	5468.33							2	2	2	2	2	2
	Q9CWY4	Gem-associated protein 7	GEMI7_MOUSE	Gemin7	1956	3862	5152	3688	3408	5337		3656.67	4144.33			induction, coexpression				2	2	2	2	2	2
	Q8BMI4	Flap endonuclease GEN homolog 1	GEN_MOUSE	Gen1	2004	1679	1594	1197	1464	1363		1759	1341.33			mito protein domain, coexpression				7	8	7	7	8	8
	Q8K0D7	Guided entry of tail-anchored proteins factor 1	GET1_MOUSE	Get1	16831	2103	79	69763	1229	1330		6337.67	24107.3			yeast mito homolog				2	2	1	2	2	2
	O54984	ATPase GET3	GET3_MOUSE	Get3	79289	74535	72127	57680	65405	62337		75317	61807.3			coexpression				14	14	14	14	14	14
	Q9D1H7	Golgi to ER traffic protein 4 homolog	GET4_MOUSE	Get4	40569	33972	38123	28252	32543	32308		37554.7	31034.3							11	11	12	11	11	11
	P03995;P03995-2	Glial fibrillary acidic protein;Isoform 2 of Glial fibrillary acidic protein	GFAP_MOUSE	Gfap	1727	553	1318	1196	1094	2247		1199.33	1512.33			targetP signal				2	2	2	2	2	2
	P56213	FAD-linked sulfhydryl oxidase ALR	ALR_MOUSE	Gfer	5372	5179	5812	4078	4957	4719		5454.33	4584.67		MitoCarta3.0	literature, GFP, targetP signal, yeast mito homolog++, mito protein domain, coexpression, MS/MS	IMS	Protein import, sorting and homeostasis > Protein import and sorting > MIA40		3	3	3	3	3	3
	Q8K0D5	Elongation factor G, mitochondrial	EFGM_MOUSE	Gfm1	93169	42555	45082	63519	74151	73368		60268.7	70346		MitoCarta3.0	literature, APEX_matrix, targetP signal, yeast mito homolog++, Rickettsial homolog, mito protein domain, induction, coexpression++, MS/MS++	Matrix	Mitochondrial central dogma > Translation > Translation factors		32	32	30	30	31	32
	Q8R2Q4;Q8R2Q4-2;Q8R2Q4-3	Ribosome-releasing factor 2, mitochondrial;Isoform 2 of Ribosome-releasing factor 2, mitochondrial;Isoform 3 of Ribosome-releasing factor 2, mitochondrial	RRF2M_MOUSE	Gfm2	8358	8060	8571	5266	7419	6935		8329.67	6540		MitoCarta3.0	literature, APEX_matrix, targetP signal, yeast mito homolog++, Rickettsial homolog, mito protein domain, coexpression++, MS/MS++	Matrix	Mitochondrial central dogma > Translation > Translation factors		14	14	15	15	15	15
	P47856;P47856-2	Glutamine--fructose-6-phosphate aminotransferase [isomerizing] 1;Isoform 2 of Glutamine--fructose-6-phosphate aminotransferase [isomerizing] 1	GFPT1_MOUSE	Gfpt1	82357	85926	85833	46980	65048	64148		84705.3	58725.3			Rickettsial homolog, mito protein domain				34	33	33	33	33	33
	Q8R0H9	ADP-ribosylation factor-binding protein GGA1	GGA1_MOUSE	Gga1	16773	17691	22657	13327	14818	14266		19040.3	14137							12	12	11	11	12	12
	Q8BMI3	ADP-ribosylation factor-binding protein GGA3	GGA3_MOUSE	Gga3	2851	1795	1882	1411	1588	1545		2176	1514.67							6	5	6	6	5	5
	Q923B0	Gamma-glutamylaminecyclotransferase	GGACT_MOUSE	Ggact	8986	7805	6379	5687	5682	5800		7723.33	5723			targetP signal, coexpression				5	5	5	5	5	5
	Q9D7X8	Gamma-glutamylcyclotransferase	GGCT_MOUSE	Ggct	48806	50716	57376	44848	48857	46853		52299.3	46852.7							8	9	8	8	8	8
	Q9Z0L8;Q9Z0L8-2	Gamma-glutamyl hydrolase;Isoform II of Gamma-glutamyl hydrolase	GGH_MOUSE	Ggh	12613	10610	10381	10470	9890	9577		11201.3	9979			mito protein domain, MS/MS				8	8	8	8	8	8
	Q5SV77;Q5SV77-2;Q5SV77-3;Q5SV77-4	Gametogenetin-binding protein 2;Isoform 2 of Gametogenetin-binding protein 2;Isoform 3 of Gametogenetin-binding protein 2;Isoform 4 of Gametogenetin-binding protein 2	GGNB2_MOUSE	Ggnbp2	1248	1057	1212	904	1349	1146		1172.33	1133							3	3	3	3	3	3
	Q9WTN0	Geranylgeranyl pyrophosphate synthase	GGPPS_MOUSE	Ggps1	5080	5231	5295	3652	4361	4356		5202	4123			yeast mito homolog, Rickettsial homolog, mito protein domain				3	3	3	3	3	3
	Q60928	Glutathione hydrolase 1 proenzyme	GGT1_MOUSE	Ggt1	2958	1684	2223	2016	2616	2100		2288.33	2244							6	6	7	7	7	6
	P23336;P23336-2;P23336-3	N-acetyllactosaminide alpha-1,3-galactosyltransferase;Isoform 2 of N-acetyllactosaminide alpha-1,3-galactosyltransferase;Isoform 3 of N-acetyllactosaminide alpha-1,3-galactosyltransferase	GGTA1_MOUSE	Ggta1	1921	1320	1354	1128	1217	1519		1531.67	1288							2	2	2	2	2	2
	Q91VC9	Growth hormone-inducible transmembrane protein	GHITM_MOUSE	Ghitm	13265	14605	17511	14826	15952	15325		15127	15367.7		MitoCarta3.0	literature, APEX_IMS, targetP signal+, Rickettsial homolog, mito protein domain+, induction, coexpression++, MS/MS	MIM	Mitochondrial dynamics and surveillance > Apoptosis		4	5	4	4	4	4
	Q9D7M1	Glucose-induced degradation protein 8 homolog	GID8_MOUSE	Gid8	9828	9952	12512	10916	7551	4598		10764	7688.33			induction				10	10	10	10	9	9
	Q99MR1	GRB10-interacting GYF protein 1	GGYF1_MOUSE	Gigyf1	302	213	224	250	226	142		246.333	206			mito protein domain				3	3	3	3	3	2
	Q6Y7W8	GRB10-interacting GYF protein 2	GGYF2_MOUSE	Gigyf2	11113	10672	10945	8666	10361	10234		10910	9753.67			mito protein domain				28	27	24	25	27	28
	P70224	GTPase IMAP family member 1	GIMA1_MOUSE	Gimap1	29211	25268	24613	20651	21562	21673		26364	21295.3			mito protein domain				12	12	12	12	12	12
	Q99MI6	GTPase IMAP family member 3	GIMA3_MOUSE	Gimap3	5958	7698	8108	7080	7478	6929		7254.67	7162.33			mito protein domain				6	6	6	6	6	6
	Q99JY3	GTPase IMAP family member 4	GIMA4_MOUSE	Gimap4	774049	736221	712510	861728	786990	778734		740927	809151			mito protein domain				27	29	27	29	26	27
	Q8BWF2	GTPase IMAP family member 5	GIMA5_MOUSE	Gimap5	38892	35702	36324	33791	39112	35865		36972.7	36256			mito protein domain				12	12	12	12	12	12
	Q8K349	GTPase IMAP family member 6	GIMA6_MOUSE	Gimap6	4438	3953	4655	3763	4479	3946		4348.67	4062.67			mito protein domain				6	6	6	6	6	6
	Q8R379	GTPase, IMAP family member 7	Q8R379_MOUSE	Gimap7	252716	217026	231981	231479	229413	214388		233908	225093			Rickettsial homolog, mito protein domain				24	25	22	22	21	24
	Q75N62	GTPase IMAP family member 8	GIMA8_MOUSE	Gimap8	19955	21220	19213	16378	18110	17000		20129.3	17162.7			mito protein domain				32	33	30	32	32	31
	G3X987	GTPase IMAP family member 9	GIMA9_MOUSE	Gimap9	93164	95048	97534	100533	100633	88337		95248.7	96501			mito protein domain				20	20	19	19	18	19
	Q9CZ15	DNA replication complex GINS protein PSF1	PSF1_MOUSE	Gins1	17391	21240	18893	16244	19905	19951		19174.7	18700							5	5	5	5	5	5
	Q9D600	DNA replication complex GINS protein PSF2	PSF2_MOUSE	Gins2	6772	4044	3607	3479	4126	3546		4807.67	3717							3	2	2	3	3	2
	Q9CY94	DNA replication complex GINS protein PSF3	PSF3_MOUSE	Gins3	27498	31669	30459	52487	51607	63483		29875.3	55859							11	11	11	11	11	11
	Q99LZ3	DNA replication complex GINS protein SLD5	SLD5_MOUSE	Gins4	23159	18860	21304	19705	19753	18400		21107.7	19286							10	10	9	9	10	10
	Q9Z0G0	PDZ domain-containing protein GIPC1	GIPC1_MOUSE	Gipc1	9476	8502	7337	6295	7309	6551		8438.33	6718.33			mito protein domain				9	9	8	8	8	8
	Q9Z2H7	PDZ domain-containing protein GIPC2	GIPC2_MOUSE	Gipc2	660	637	462	0	411	296		586.333	235.667			mito protein domain				2	2	2	Filtered	2	2
	Q68FF6	ARF GTPase-activating protein GIT1	GIT1_MOUSE	Git1	4997	4955	5083	4235	4548	4449		5011.67	4410.67			Rickettsial homolog, mito protein domain				13	14	14	14	14	14
	Q9JLQ2	ARF GTPase-activating protein GIT2	GIT2_MOUSE	Git2	29377	28831	27744	23272	25232	25764		28650.7	24756			mito protein domain				28	27	27	28	28	29
	Q64516;Q64516-1;Q64516-2	Glycerol kinase;Isoform 1 of Glycerol kinase;Isoform 2 of Glycerol kinase	GLPK_MOUSE	Gk	10258	9692	11021	7916	9785	9365		10323.7	9022		mito-interacting	literature, yeast mito homolog+, mito protein domain, induction, coexpression, MS/MS++				12	12	12	12	12	12
	P51569	Alpha-galactosidase A	AGAL_MOUSE	Gla	6041	5304	5147	4299	5230	4558		5497.33	4695.67							7	7	7	7	7	7
	P23780	Beta-galactosidase	BGAL_MOUSE	Glb1	20354	19203	16090	13654	14767	15661		18549	14694			MS/MS				16	17	16	16	16	16
	Q8R322	Nucleoporin GLE1	GLE1_MOUSE	Gle1	4994	4736	4185	3085	3711	3488		4638.33	3428			yeast mito homolog				8	8	8	8	8	8
	Q61543	Golgi apparatus protein 1	GSLG1_MOUSE	Glg1	29229	26965	28900	21050	24075	21165		28364.7	22096.7							46	47	46	47	48	46
	Q9CWG1	Glioma pathogenesis-related protein 1	GLIP1_MOUSE	Glipr1	6830	6645	7914	5269	5908	5198		7129.67	5458.33							5	5	5	4	5	5
	Q9CYL5	Golgi-associated plant pathogenesis-related protein 1	GAPR1_MOUSE	Glipr2	402430	440180	430171	345425	396696	403046		424260	381722							9	9	9	9	9	9
	Q8BZM1	Glomulin	GLMN_MOUSE	Glmn	15725	13600	13676	10993	12553	12071		14333.7	11872.3							20	18	17	17	19	19
	Q9JHJ3	Glycosylated lysosomal membrane protein	GLMP_MOUSE	Glmp	6397	5466	5560	3596	4795	3976		5807.67	4122.33							2	2	2	2	2	2
	Q9CPU0	Lactoylglutathione lyase	LGUL_MOUSE	Glo1	191401	161401	179955	321347	288738	251626		177586	287237			coexpression				15	15	13	14	16	16
	Q9CPV4	Glyoxalase domain-containing protein 4	GLOD4_MOUSE	Glod4	204686	192059	188370	152843	176439	181478		195038	170253		MitoCarta3.0	APEX_matrix, targetP signal, coexpression, MS/MS++	Matrix			23	23	22	21	23	23
	Q9QUH0	Glutaredoxin-1	GLRX1_MOUSE	Glrx	694935	755030	658041	366777	537726	582498		702669	495667			yeast mito homolog, Rickettsial homolog, mito protein domain				9	9	9	10	9	9
	Q923X4;Q923X4-2	Glutaredoxin-2, mitochondrial;Isoform 2 of Glutaredoxin-2, mitochondrial	GLRX2_MOUSE	Glrx2	3833	3430	4215	2878	2996	3279		3826	3051		MitoCarta3.0	literature, targetP signal+, yeast mito homolog, Rickettsial homolog, mito protein domain, coexpression, MS/MS	Matrix	Metabolism > Metals and cofactors > Fe-S-containing proteins | Metabolism > Vitamin metabolism > Vitamin C metabolism | Metabolism > Detoxification > ROS and glutathione metabolism		3	3	3	3	3	3
	Q9CQM9	Glutaredoxin-3	GLRX3_MOUSE	Glrx3	251433	274886	282442	221716	238220	242413		269587	234116			Rickettsial homolog, mito protein domain, induction, coexpression				24	23	21	20	21	24
	Q80Y14	Glutaredoxin-related protein 5, mitochondrial	GLRX5_MOUSE	Glrx5	21517	22681	20986	17082	19862	15586		21728	17510		MitoCarta3.0	literature, APEX_matrix, targetP signal+, yeast mito homolog+, Rickettsial homolog, mito protein domain, coexpression, MS/MS+	Matrix	Metabolism > Metals and cofactors > Fe-S cluster biosynthesis | Metabolism > Metals and cofactors > Fe-S-containing proteins		4	4	4	4	4	4
	D3Z7P3	Glutaminase kidney isoform, mitochondrial	GLSK_MOUSE	Gls	66960	60211	57393	54707	56373	53515		61521.3	54865		MitoCarta3.0	literature, APEX_matrix, targetP signal+, mito protein domain+, MS/MS++	MIM	Metabolism > Amino acid metabolism > Glutamate metabolism		29	27	26	27	27	29
	D3Z7P3-2	Isoform 2 of Glutaminase kidney isoform, mitochondrial	GLSK_MOUSE	Gls	11814	11290	12461	11663	12001	10757		11855	11473.7		MitoCarta3.0	literature, APEX_matrix, targetP signal+, mito protein domain+, MS/MS++	MIM	Metabolism > Amino acid metabolism > Glutamate metabolism		3	4	4	3	3	4
	Q9JL62	Glycolipid transfer protein	GLTP_MOUSE	Gltp	78828	70875	72380	61656	65807	61583		74027.7	63015.3							10	11	10	9	10	10
	P26443	Glutamate dehydrogenase 1, mitochondrial	DHE3_MOUSE	Glud1	230943	222004	232333	220757	219658	216403		228427	218939		MitoCarta3.0	literature, APEX_matrix, targetP signal, yeast mito homolog, Rickettsial homolog, mito protein domain, coexpression, MS/MS++	Matrix	Metabolism > Amino acid metabolism > Glutamate metabolism | Metabolism > Amino acid metabolism > GABA metabolism		31	29	30	28	30	30
	P15105	Glutamine synthetase	GLNA_MOUSE	Glul	4072	3973	3599	3350	3722	3888		3881.33	3653.33			Rickettsial homolog, mito protein domain				6	5	6	6	6	6
	Q922P9	Putative oxidoreductase GLYR1	GLYR1_MOUSE	Glyr1	41902	38672	29825	33258	36287	26465		36799.7	32003.3			mito protein domain				20	21	19	20	20	20
	Q60648	Ganglioside GM2 activator	SAP3_MOUSE	Gm2a	73132	81489	85304	88783	99536	89605		79975	92641.3			MS/MS+				6	6	4	4	6	6
	Q8K0C9	GDP-mannose 4,6 dehydratase	GMDS_MOUSE	Gmds	94456	84288	96687	58618	82174	66743		91810.3	69178.3			mito protein domain				16	16	16	16	16	16
	Q9JL60	Glucocorticoid modulatory element-binding protein 1	GMEB1_MOUSE	Gmeb1	7936	4743	4575	6215	4797	5717		5751.33	5576.33							5	5	5	4	5	5
[truncated: 4,936 more rows]

## Sheet: fold change + q value
Day 6, IL2 expanded CD8 T cells, Proteomics
black text - proteins quantified by >=2 peptides in at least two bio reps of one condition, grey text - proteins quantified by fewer peptides than this					Pim dKO / WT				MitoCarta3.0_Annotation
	Protein_Group_IDs (uniprot)	Protein description	Protein names	Gene names	log2(fold-change)	q value	-log10(p-value)		MitoCarta 3.0 List	Evidence	SubMitoLocalization	MitoPathways
	Q6GQT1	Alpha-2-macroglobulin-P	A2MG_MOUSE	A2m	-0.186492	0.175074	0.234425			MS/MS
	P58742	Aladin	AAAS_MOUSE	Aaas	-0.51157	0.0310576	1.40896			mito protein domain
	Q9D2R0	Acetoacetyl-CoA synthetase	AACS_MOUSE	Aacs	-0.314219	0.0301041	1.44627			mito protein domain, coexpression
	Q8R2R3	Alpha- and gamma-adaptin-binding protein p34	AAGAB_MOUSE	Aagab	-0.45767	0.0298654	1.46038
	Q3UHJ0	AP2-associated protein kinase 1	AAK1_MOUSE	Aak1	-0.159698	0.0691849	0.783177			mito protein domain, MS/MS
	Q8R0P4	Mth938 domain-containing protein	AAMDC_MOUSE	Aamdc	0.116743	0.161259	0.281116			mito protein domain
	J3QN89;Q3TJ22	Angio-associated migratory protein	J3QN89_MOUSE;Q3TJ22_MOUSE	Aamp	-0.326008	0.0279451	1.93697			mito protein domain
	Q9D2V5	Protein AAR2 homolog	AAR2_MOUSE	Aar2	-0.106273	0.237353	0.0610466
	Q8BGQ7	Alanine--tRNA ligase, cytoplasmic	SYAC_MOUSE	Aars1	-0.4036	0.0287318	1.55224			yeast mito homolog, Rickettsial homolog, mito protein domain
	Q14CH7	Alanine--tRNA ligase, mitochondrial	SYAM_MOUSE	Aars2	-0.327117	0.218054	0.110803		MitoCarta3.0	literature, APEX_matrix, targetP signal, yeast mito homolog, Rickettsial homolog, mito protein domain, MS/MS	Matrix	Mitochondrial central dogma > Translation > mt-tRNA synthetases
	Q3THG9	Alanyl-tRNA editing protein Aarsd1	AASD1_MOUSE	Aarsd1	-0.349212	0.0291707	1.49665			Rickettsial homolog, mito protein domain
	Q9CQF6	L-aminoadipate-semialdehyde dehydrogenase-phosphopantetheinyl transferase	ADPPT_MOUSE	Aasdhppt	-0.511476	0.0279451	2.64143			Rickettsial homolog, coexpression
	Q9JKX4	Protein AATF	AATF_MOUSE	Aatf	-0.0990291	0.0981341	0.564564
	Q91V24	ATP-binding cassette sub-family A member 7	ABCA7_MOUSE	Abca7	0.426817	0.108804	0.50393			Rickettsial homolog, mito protein domain, induction
	Q9JI39	ATP-binding cassette sub-family B member 10, mitochondrial	ABCBA_MOUSE	Abcb10	0.0441795	0.230677	0.0769597		MitoCarta3.0	literature, APEX_matrix, targetP signal+, yeast mito homolog+, Rickettsial homolog, mito protein domain, induction, coexpression, MS/MS+	MIM	Metabolism > Metals and cofactors > Heme synthesis and processing | Small molecule transport > ABC transporters
	P21447	ATP-dependent translocase ABCB1	MDR1A_MOUSE	Abcb1a	-0.202584	0.0342882	1.29901			Rickettsial homolog, mito protein domain, MS/MS
	P06795	ATP-dependent translocase ABCB1	MDR1B_MOUSE	Abcb1b	-0.011966	0.2539	0.0224446			Rickettsial homolog, mito protein domain, coexpression
	Q61102	ATP-binding cassette sub-family B member 7, mitochondrial	ABCB7_MOUSE	Abcb7	-0.201732	0.0436884	1.09529		MitoCarta3.0	literature, APEX_matrix, targetP signal, yeast mito homolog+, Rickettsial homolog, mito protein domain, coexpression+, MS/MS+	MIM	Metabolism > Metals and cofactors > Heme synthesis and processing | Metabolism > Metals and cofactors > Fe-S cluster biosynthesis | Metabolism > Metals and cofactors > Molybdenum cofactor synthesis and proteins | Small molecule transport > ABC transporters
	Q9CXJ4	Mitochondrial potassium channel ATP-binding subunit	MITOS_MOUSE	Abcb8	-0.325722	0.0279451	1.81992		MitoCarta3.0	literature, targetP signal, yeast mito homolog, Rickettsial homolog, mito protein domain, coexpression++, MS/MS++	MIM	Small molecule transport > ABC transporters
	Q9JJ59;Q9JJ59-2	ATP-binding cassette sub-family B member 9;Isoform 2 of ATP-binding cassette sub-family B member 9	ABCB9_MOUSE	Abcb9	-0.174092	0.183557	0.206863			yeast mito homolog+, Rickettsial homolog, mito protein domain
	O35379	Multidrug resistance-associated protein 1	MRP1_MOUSE	Abcc1	-0.256122	0.0750086	0.732287			Rickettsial homolog, mito protein domain
	E9Q236;E9Q467	ATP-binding cassette, sub-family C (CFTR/MRP), member 4;ATP-binding cassette, sub-family C (CFTR/MRP), member 4	E9Q236_MOUSE;E9Q467_MOUSE	Abcc4	-0.243919	0.0666367	0.806422			Rickettsial homolog, mito protein domain
	P48410	ATP-binding cassette sub-family D member 1	ABCD1_MOUSE	Abcd1	-0.0337236	0.220643	0.103711		MitoCarta3.0	targetP signal, Rickettsial homolog, mito protein domain, induction	Membrane	Small molecule transport > ABC transporters
	P55096	ATP-binding cassette sub-family D member 3	ABCD3_MOUSE	Abcd3	-0.249938	0.0447613	1.07693		MitoCarta3.0	GFP, targetP signal, Rickettsial homolog, mito protein domain, induction, coexpression	Membrane	Small molecule transport > ABC transporters
	P61222	ATP-binding cassette sub-family E member 1	ABCE1_MOUSE	Abce1	-0.329567	0.0279451	1.85242			Rickettsial homolog, mito protein domain
	Q6P542	ATP-binding cassette sub-family F member 1	ABCF1_MOUSE	Abcf1	-0.217876	0.0347546	1.2843			Rickettsial homolog, mito protein domain, coexpression
	Q99LE6	ATP-binding cassette sub-family F member 2	ABCF2_MOUSE	Abcf2	-0.26369	0.0334807	1.31954			literature, Rickettsial homolog, mito protein domain
	Q8K268	ATP-binding cassette sub-family F member 3	ABCF3_MOUSE	Abcf3	-0.209639	0.0358013	1.26059			Rickettsial homolog, mito protein domain
	Q99P81	ATP-binding cassette sub-family G member 3	ABCG3_MOUSE	Abcg3	-0.399512	0.0838287	0.663855			Rickettsial homolog, mito protein domain
	Q6PE15	Mycophenolic acid acyl-glucuronide esterase, mitochondrial	ABHDA_MOUSE	Abhd10	-0.232687	0.0924037	0.60215		MitoCarta3.0	literature, APEX_IMS, APEX_matrix, targetP signal+, Rickettsial homolog, mito protein domain, MS/MS++	Matrix	Metabolism > Detoxification > Xenobiotic metabolism
	Q8K4F5	Protein ABHD11	ABHDB_MOUSE	Abhd11	-0.397577	0.0402433	1.16279		MitoCarta3.0	literature, APEX_matrix, targetP signal+, yeast mito homolog++, Rickettsial homolog, mito protein domain, coexpression+, MS/MS++	Matrix	Metabolism > Carbohydrate metabolism > TCA-associated
	Q99LR1	Lysophosphatidylserine lipase ABHD12	ABD12_MOUSE	Abhd12	-0.405008	0.0279451	1.67342			yeast mito homolog, Rickettsial homolog, mito protein domain
	Q80UX8	Protein ABHD13	ABHDD_MOUSE	Abhd13	-0.535097	0.0279451	2.03823			yeast mito homolog, Rickettsial homolog, mito protein domain
	Q8VCR7	Protein ABHD14B	ABHEB_MOUSE	Abhd14b	-0.213557	0.112567	0.48326
	Q5F2F2	Protein ABHD15	ABH15_MOUSE	Abhd15	-0.282929	0.0509789	0.98659			yeast mito homolog
	Q9Z1Q2	Phosphatidylserine lipase ABHD16A	ABHGA_MOUSE	Abhd16a	-0.0708404	0.145227	0.340216			yeast mito homolog, mito protein domain
	Q99JW1	Alpha/beta hydrolase domain-containing protein 17A	AB17A_MOUSE	Abhd17a	-1.13566	0.0283715	1.60858			yeast mito homolog
	Q7M759	Alpha/beta hydrolase domain-containing protein 17B	AB17B_MOUSE	Abhd17b	-0.615161	0.0283715	1.5967			yeast mito homolog
	Q9DBL9;Q9DBL9-2	1-acylglycerol-3-phosphate O-acyltransferase ABHD5;Isoform 2 of 1-acylglycerol-3-phosphate O-acyltransferase ABHD5	ABHD5_MOUSE	Abhd5	-0.459362	0.0589841	0.882926			mito protein domain, induction, coexpression
	Q8R2Y0;Q8R2Y0-2	Monoacylglycerol lipase ABHD6;Isoform 2 of Monoacylglycerol lipase ABHD6	ABHD6_MOUSE	Abhd6	-0.550003	0.0428327	1.10888			Rickettsial homolog, mito protein domain, MS/MS
	Q8CBW3;Q8CBW3-2;Q8CBW3-3;Q8CBW3-4	Abl interactor 1;Isoform 2 of Abl interactor 1;Isoform 3 of Abl interactor 1;Isoform 4 of Abl interactor 1	ABI1_MOUSE	Abi1	-0.103761	0.093682	0.592881			mito protein domain
	Q8BYZ1	ABI gene family member 3	ABI3_MOUSE	Abi3	-0.308173	0.03523	1.2735			mito protein domain
	Q80ZQ9	Protein Abitram	ABITM_MOUSE	Abitram	-0.251292	0.0316174	1.39246			mito protein domain+
	Q8K4G5;Q8K4G5-2;Q8K4G5-3	Actin-binding LIM protein 1;Isoform 2 of Actin-binding LIM protein 1;Isoform 3 of Actin-binding LIM protein 1	ABLM1_MOUSE	Ablim1	-0.176232	0.0442951	1.08505
	Q5SSL4;Q5SSL4-2	Active breakpoint cluster region-related protein;Isoform 2 of Active breakpoint cluster region-related protein	ABR_MOUSE	Abr	-0.395612	0.0308984	1.41472			mito protein domain
	Q4KML4	Costars family protein ABRACL	ABRAL_MOUSE	Abracl	-0.869929	0.0306353	1.42617
	Q8BPZ8	BRCA1-A complex subunit Abraxas 1	ABRX1_MOUSE	Abraxas1	-0.969786	0.0520291	0.97178
	Q3TCJ1	BRISC complex subunit Abraxas 2	ABRX2_MOUSE	Abraxas2	-0.142786	0.0677216	0.79627
	Q9QYL7	Activator of basal transcription 1	ABT1_MOUSE	Abt1	-0.0295809	0.230066	0.0787674
	Q921H8	3-ketoacyl-CoA thiolase A, peroxisomal	THIKA_MOUSE	Acaa1a	-0.148157	0.0591053	0.881325		MitoCarta3.0	targetP signal, yeast mito homolog+, Rickettsial homolog, mito protein domain, coexpression	Matrix	Metabolism > Lipid metabolism > Fatty acid oxidation
	Q8BWT1	3-ketoacyl-CoA thiolase, mitochondrial	THIM_MOUSE	Acaa2	-0.12697	0.0604926	0.867521		MitoCarta3.0	literature, APEX_matrix, targetP signal, Rickettsial homolog, mito protein domain, induction, coexpression+, MS/MS++	Matrix	Metabolism > Carbohydrate metabolism > Ketone metabolism | Metabolism > Lipid metabolism > Fatty acid oxidation | Metabolism > Amino acid metabolism > Lysine metabolism
	Q5SWU9;Q5SWU9-2	Acetyl-CoA carboxylase 1;Isoform 2 of Acetyl-CoA carboxylase 1	ACACA_MOUSE	Acaca	-0.281306	0.0279451	1.66556		MitoCarta3.0	yeast mito homolog, Rickettsial homolog, mito protein domain, coexpression	Matrix	Metabolism > Lipid metabolism > Type II fatty acid synthesis | Metabolism > Vitamin metabolism > Biotin utilizing proteins
	Q8K370	Acyl-CoA dehydrogenase family member 10	ACD10_MOUSE	Acad10	-0.289821	0.0935304	0.59486		MitoCarta3.0	APEX_matrix, targetP signal+, mito protein domain+, coexpression, MS/MS++	Matrix	Metabolism > Lipid metabolism > Fatty acid oxidation
	Q80XL6	Acyl-CoA dehydrogenase family member 11	ACD11_MOUSE	Acad11	-0.309225	0.0712938	0.763158		MitoCarta3.0	mito protein domain+, induction, coexpression	MIM	Metabolism > Lipid metabolism > Fatty acid oxidation
	Q9D7B6	Isobutyryl-CoA dehydrogenase, mitochondrial	ACAD8_MOUSE	Acad8	0.175138	0.0890052	0.626142		MitoCarta3.0	literature, APEX_matrix, targetP signal+, mito protein domain+, coexpression, MS/MS++	Matrix	Metabolism > Amino acid metabolism > Branched-chain amino acid metabolism
	Q8JZN5	Complex I assembly factor ACAD9, mitochondrial	ACAD9_MOUSE	Acad9	-0.112537	0.0795691	0.694309		MitoCarta3.0	literature, APEX_matrix, targetP signal+, mito protein domain+, MS/MS++	MIM	OXPHOS > Complex I > CI assembly factors | OXPHOS > OXPHOS assembly factors
	P51174	Long-chain specific acyl-CoA dehydrogenase, mitochondrial	ACADL_MOUSE	Acadl	-0.303333	0.0279451	1.8221		MitoCarta3.0	literature, targetP signal+, mito protein domain+, induction, coexpression+, MS/MS++	MIM	Metabolism > Lipid metabolism > Fatty acid oxidation
	P45952	Medium-chain specific acyl-CoA dehydrogenase, mitochondrial	ACADM_MOUSE	Acadm	-0.00831187	0.24649	0.0394363		MitoCarta3.0	literature, APEX_matrix, targetP signal, mito protein domain+, induction, coexpression++, MS/MS++	Matrix	Metabolism > Lipid metabolism > Fatty acid oxidation
	Q07417	Short-chain specific acyl-CoA dehydrogenase, mitochondrial	ACADS_MOUSE	Acads	-0.107839	0.0862108	0.647235		MitoCarta3.0	literature, APEX_matrix, targetP signal+, mito protein domain+, induction, coexpression++, MS/MS++	Matrix	Metabolism > Lipid metabolism > Fatty acid oxidation
	Q9DBL1	Short/branched chain specific acyl-CoA dehydrogenase, mitochondrial	ACDSB_MOUSE	Acadsb	-0.0775967	0.226377	0.0883698		MitoCarta3.0	literature, APEX_matrix, targetP signal, mito protein domain+, induction, coexpression, MS/MS++	Matrix	Metabolism > Lipid metabolism > Fatty acid oxidation | Metabolism > Amino acid metabolism > Branched-chain amino acid metabolism
	P50544	Very long-chain specific acyl-CoA dehydrogenase, mitochondrial	ACADV_MOUSE	Acadvl	-0.11039	0.102628	0.538899		MitoCarta3.0	literature, APEX_matrix, targetP signal+, mito protein domain+, coexpression+, MS/MS++	MIM	Metabolism > Lipid metabolism > Fatty acid oxidation
	Q8K2H4	Arf-GAP with coiled-coil, ANK repeat and PH domain-containing protein 1	ACAP1_MOUSE	Acap1	-0.293231	0.0279451	1.82591			Rickettsial homolog, mito protein domain
	Q6ZQK5	Arf-GAP with coiled-coil, ANK repeat and PH domain-containing protein 2	ACAP2_MOUSE	Acap2	-0.308688	0.0279451	1.82868			Rickettsial homolog, mito protein domain
	Q8QZT1	Acetyl-CoA acetyltransferase, mitochondrial	THIL_MOUSE	Acat1	-0.226846	0.0390204	1.18961		MitoCarta3.0	literature, APEX_matrix, targetP signal, Rickettsial homolog, mito protein domain, induction, coexpression+, MS/MS++	Matrix	Metabolism > Carbohydrate metabolism > Ketone metabolism | Metabolism > Lipid metabolism > Fatty acid oxidation | Metabolism > Amino acid metabolism > Branched-chain amino acid metabolism | Metabolism > Amino acid metabolism > Lysine metabolism
	Q8CAY6	Acetyl-CoA acetyltransferase, cytosolic	THIC_MOUSE	Acat2	-0.300429	0.0283715	1.59815			Rickettsial homolog, mito protein domain, coexpression
	Q8BMP6	Golgi resident protein GCP60	GCP60_MOUSE	Acbd3	-0.136223	0.199226	0.161664			mito protein domain
	Q5XG73;Q5XG73-2;Q5XG73-3	Acyl-CoA-binding domain-containing protein 5;Isoform 2 of Acyl-CoA-binding domain-containing protein 5;Isoform 3 of Acyl-CoA-binding domain-containing protein 5	ACBD5_MOUSE	Acbd5	-0.061893	0.213859	0.121387			mito protein domain
	Q9D061	Acyl-CoA-binding domain-containing protein 6	ACBD6_MOUSE	Acbd6	-0.502066	0.0279451	2.53516			Rickettsial homolog, mito protein domain
	Q5EE38	Adrenocortical dysplasia protein	ACD_MOUSE	Acd	-0.363622	0.0528849	0.959686
	Q9JIX8;Q9JIX8-4	Apoptotic chromatin condensation inducer in the nucleus;Isoform 4 of Apoptotic chromatin condensation inducer in the nucleus	ACINU_MOUSE	Acin1	-0.124461	0.06459	0.825897			mito protein domain
	Q91V92	ATP-citrate synthase	ACLY_MOUSE	Acly	-0.357082	0.0279451	1.71639		MitoCarta3.0	APEX_matrix, yeast mito homolog+, Rickettsial homolog, mito protein domain, coexpression	Matrix	Metabolism > Carbohydrate metabolism > TCA-associated
	P28271	Cytoplasmic aconitate hydratase	ACOC_MOUSE	Aco1	-0.355868	0.0296488	1.4707			yeast mito homolog, Rickettsial homolog, mito protein domain, coexpression
	Q99KI0	Aconitate hydratase, mitochondrial	ACON_MOUSE	Aco2	-0.151232	0.0573202	0.902633		MitoCarta3.0	literature, APEX_matrix, targetP signal, yeast mito homolog, Rickettsial homolog, mito protein domain, induction, coexpression++, MS/MS++	Matrix	Metabolism > Carbohydrate metabolism > TCA cycle | Metabolism > Metals and cofactors > Fe-S-containing proteins
	Q8VHQ9	Acyl-coenzyme A thioesterase 11	ACO11_MOUSE	Acot11	-0.611533	0.0279451	1.7834		MitoCarta3.0	literature,targetP signal, mito protein domain, coexpression	Matrix	Metabolism > Lipid metabolism > Fatty acid oxidation
	Q9CQR4	Acyl-coenzyme A thioesterase 13	ACO13_MOUSE	Acot13	-0.215812	0.0651386	0.820434		MitoCarta3.0	mito protein domain, induction, coexpression, MS/MS++	Matrix	Metabolism > Lipid metabolism
	Q9QYR9	Acyl-coenzyme A thioesterase 2, mitochondrial	ACOT2_MOUSE	Acot2	-0.346082	0.0527836	0.961257		MitoCarta3.0	literature, targetP signal, mito protein domain, induction, coexpression, MS/MS++	Matrix	Metabolism > Lipid metabolism
	Q91V12-2	Isoform A of Cytosolic acyl coenzyme A thioester hydrolase	BACH_MOUSE	Acot7	-0.388438	0.0279451	1.92481		MitoCarta3.0	targetP signal, mito protein domain, induction	Matrix	Metabolism > Lipid metabolism
	P58137	Acyl-coenzyme A thioesterase 8	ACOT8_MOUSE	Acot8	-0.232065	0.0571268	0.905083			yeast mito homolog
	Q9R0X4	Acyl-coenzyme A thioesterase 9, mitochondrial	ACOT9_MOUSE	Acot9	-0.298764	0.0283413	1.61247		MitoCarta3.0	literature, targetP signal, MS/MS++	MIM	Metabolism > Lipid metabolism
	Q9EPL9	Peroxisomal acyl-coenzyme A oxidase 3	ACOX3_MOUSE	Acox3	0.15622	0.130031	0.403799			mito protein domain+, induction
	Q9D358	Low molecular weight phosphotyrosine protein phosphatase	PPAC_MOUSE	Acp1	-0.304044	0.0279451	1.74393			MS/MS
	Q8CE08;Q8CE08-2	Prostatic acid phosphatase;Isoform 2 of Prostatic acid phosphatase	PPAP_MOUSE	Acp3	-1.91199	0.0279451	1.84108			mito protein domain
	Q05117	Tartrate-resistant acid phosphatase type 5	PPA5_MOUSE	Acp5	-0.487847	0.0362749	1.24916
	Q8BP40	Lysophosphatidic acid phosphatase type 6	PPA6_MOUSE	Acp6	-0.0317419	0.228684	0.0823689		MitoCarta3.0	literature, APEX_IMS, targetP signal, mito protein domain, MS/MS++	IMS	Metabolism > Lipid metabolism > Phospholipid metabolism
	Q8VCW8	Medium-chain acyl-CoA ligase ACSF2, mitochondrial	ACSF2_MOUSE	Acsf2	-0.0660178	0.198141	0.16468		MitoCarta3.0	APEX_matrix, targetP signal, Rickettsial homolog, mito protein domain, MS/MS++	Matrix	Metabolism > Lipid metabolism > Fatty acid oxidation
	Q3URE1	Malonate--CoA ligase ACSF3, mitochondrial	ACSF3_MOUSE	Acsf3	-0.150968	0.0442951	1.08509		MitoCarta3.0	APEX_matrix, targetP signal+, Rickettsial homolog, mito protein domain, coexpression+, MS/MS++	Matrix	Metabolism > Lipid metabolism > Type II fatty acid synthesis
	P41216	Long-chain-fatty-acid--CoA ligase 1	ACSL1_MOUSE	Acsl1	-0.245454	0.055256	0.927328		MitoCarta3.0	yeast mito homolog, Rickettsial homolog, mito protein domain, coexpression	MOM	Metabolism > Lipid metabolism > Fatty acid oxidation
	Q9CZW4	Long-chain-fatty-acid--CoA ligase 3	ACSL3_MOUSE	Acsl3	-0.306839	0.0355273	1.26687			Rickettsial homolog, mito protein domain
	Q9QUJ7;Q9QUJ7-2	Long-chain-fatty-acid--CoA ligase 4;Isoform Short of Long-chain-fatty-acid--CoA ligase 4	ACSL4_MOUSE	Acsl4	-0.514656	0.0279451	2.01525		mito-interacting	GFP, Rickettsial homolog, mito protein domain
	Q8JZR0	Long-chain-fatty-acid--CoA ligase 5	ACSL5_MOUSE	Acsl5	-0.298612	0.0279451	1.82754			yeast mito homolog, Rickettsial homolog, mito protein domain, induction
	Q99NB1	Acetyl-coenzyme A synthetase 2-like, mitochondrial	ACS2L_MOUSE	Acss1	0.462362	0.0464899	1.04956		MitoCarta3.0	literature, APEX_matrix, targetP signal, mito protein domain, MS/MS++	MIM	Metabolism > Lipid metabolism > Fatty acid oxidation
	Q9QXG4	Acetyl-coenzyme A synthetase, cytoplasmic	ACSA_MOUSE	Acss2	-0.526779	0.0679726	0.793962			mito protein domain, induction, coexpression
	P68134	Actin, alpha skeletal muscle	ACTS_MOUSE	Acta1	-0.512887	0.0279451	2.17323			MS/MS
	P60710	Actin, cytoplasmic 1	ACTB_MOUSE	Actb	-0.550574	0.0279451	2.25674
	Q8BFZ3	Beta-actin-like protein 2	ACTBL_MOUSE	Actbl2	-0.288952	0.0511548	0.984273
	P68033	Actin, alpha cardiac muscle 1	ACTC_MOUSE	Actc1	-0.368208	0.0279451	1.65496			coexpression
	P63260	Actin, cytoplasmic 2	ACTG_MOUSE	Actg1	-0.510494	0.0331533	1.33835
	Q9Z2N8	Actin-like protein 6A	ACL6A_MOUSE	Actl6a	-0.10529	0.075847	0.723053
	Q7TPR4	Alpha-actinin-1	ACTN1_MOUSE	Actn1	-0.334869	0.0279451	2.08162			mito protein domain
	P57780	Alpha-actinin-4	ACTN4_MOUSE	Actn4	-0.307365	0.0279451	1.74426			mito protein domain
	Q9QZB7	Actin-related protein 10	ARP10_MOUSE	Actr10	-0.370042	0.0279451	1.8519
	P61164	Alpha-centractin	ACTZ_MOUSE	Actr1a	-0.148562	0.0752543	0.729328
	Q8R5C5	Beta-centractin	ACTY_MOUSE	Actr1b	-0.318326	0.0279451	1.96518
	P61161	Actin-related protein 2	ARP2_MOUSE	Actr2	-0.221236	0.0296904	1.46796			yeast mito homolog
	Q99JY9	Actin-related protein 3	ARP3_MOUSE	Actr3	-0.274759	0.0305656	1.42907
	Q80US4	Actin-related protein 5	ARP5_MOUSE	Actr5	-0.213301	0.0741347	0.739791
	Q9D864	Actin-related protein 6	ARP6_MOUSE	Actr6	-0.254441	0.0461183	1.05478			induction
	Q8R2S9	Actin-related protein 8	ARP8_MOUSE	Actr8	-0.350665	0.0289234	1.51713
	Q61288	Serine/threonine-protein kinase receptor R3	ACVL1_MOUSE	Acvrl1	-0.603743	0.0536256	0.947888			targetP signal, mito protein domain
	Q99JW2	Aminoacylase-1	ACY1_MOUSE	Acy1	-0.342688	0.0279451	1.98095			Rickettsial homolog
	P56376	Acylphosphatase-1	ACYP1_MOUSE	Acyp1	-0.0734721	0.183446	0.207535			MS/MS++
	P03958	Adenosine deaminase	ADA_MOUSE	Ada	-0.179093	0.0373119	1.22633			MS/MS
	O35598	Disintegrin and metalloproteinase domain-containing protein 10	ADA10_MOUSE	Adam10	-0.200602	0.0379072	1.21176
	Q9Z0F8;Q9Z0F8-2	Disintegrin and metalloproteinase domain-containing protein 17;Isoform Short of Disintegrin and metalloproteinase domain-containing protein 17	ADA17_MOUSE	Adam17	-0.442752	0.0279451	2.23842
	O35674	Disintegrin and metalloproteinase domain-containing protein 19	ADA19_MOUSE	Adam19	-0.374471	0.0289943	1.51245
	Q05910	Disintegrin and metalloproteinase domain-containing protein 8	ADAM8_MOUSE	Adam8	-0.972393	0.0279451	1.6752
	E9PY16	ArfGAP with dual PH domains 1	E9PY16_MOUSE	Adap1	-0.307723	0.0417465	1.13368			mito protein domain
	Q99MU3-2	Isoform 2 of Double-stranded RNA-specific adenosine deaminase	DSRAD_MOUSE	Adar	-0.309602	0.0279451	1.82799			mito protein domain
	Q9JHI2;Q9JHI2-2;Q9JHI2-3	tRNA-specific adenosine deaminase 1;Isoform 2 of tRNA-specific adenosine deaminase 1;Isoform 3 of tRNA-specific adenosine deaminase 1	ADAT1_MOUSE	Adat1	-0.125218	0.152303	0.313174
	Q6P6J0	tRNA-specific adenosine deaminase 2	ADAT2_MOUSE	Adat2	-2.43332	0.0692104	0.782718			Rickettsial homolog
	Q9D0L4	AarF domain-containing protein kinase 1	ADCK1_MOUSE	Adck1	-0.721255	0.0355198	1.26735		MitoCarta3.0	yeast mito homolog+, Rickettsial homolog, mito protein domain, MS/MS	unknown
	Q80V03;Q80V03-2	Uncharacterized aarF domain-containing protein kinase 5;Isoform 2 of Uncharacterized aarF domain-containing protein kinase 5	ADCK5_MOUSE	Adck5	-0.17301	0.19214	0.181632		MitoCarta3.0	targetP signal, yeast mito homolog+, Rickettsial homolog, mito protein domain, induction, coexpression, MS/MS	unknown
	Q8VHH7	Adenylate cyclase type 3	ADCY3_MOUSE	Adcy3	-1.58481	0.0279451	2.99096			mito protein domain, coexpression
	P51829	Adenylate cyclase type 7	ADCY7_MOUSE	Adcy7	-0.56732	0.0288563	1.52733			mito protein domain
	Q9QYC0	Alpha-adducin	ADDA_MOUSE	Add1	-0.102251	0.0758352	0.723429			Rickettsial homolog
	Q9QYB5-2	Isoform 1 of Gamma-adducin	ADDG_MOUSE	Add3	-0.00807003	0.249949	0.031757			Rickettsial homolog
	Q9Z0M6;Q9Z0M6-3	Adhesion G protein-coupled receptor E5;Isoform 3 of Adhesion G protein-coupled receptor E5	AGRE5_MOUSE	Adgre5	0.268333	0.0615631	0.857471
	P28474	Alcohol dehydrogenase class-3	ADHX_MOUSE	Adh5	-0.151477	0.0580776	0.892811			yeast mito homolog, mito protein domain, coexpression
	Q99JT9	1,2-dihydroxy-3-keto-5-methylthiopentene dioxygenase	MTND_MOUSE	Adi1	-0.218337	0.0512953	0.981675
	P55264	Adenosine kinase	ADK_MOUSE	Adk	-0.122123	0.0814982	0.680734			coexpression
	Q9Z103	Activity-dependent neuroprotector homeobox protein	ADNP_MOUSE	Adnp	-0.0206839	0.226789	0.0872346
	Q8CHC8	Activity-dependent neuroprotector homeobox protein 2	ADNP2_MOUSE	Adnp2	-0.0910163	0.122307	0.437711
	Q6PDY2	2-aminoethanethiol dioxygenase	AEDO_MOUSE	Ado	-0.0585762	0.180359	0.216607			targetP signal, MS/MS
	Q8VDL4;Q8VDL4-3	ADP-dependent glucokinase;Isoform 3 of ADP-dependent glucokinase	ADPGK_MOUSE	Adpgk	-0.30628	0.0279451	1.99742
	P54923	[Protein ADP-ribosylarginine] hydrolase	ADPRH_MOUSE	Adprh	-0.0173597	0.229643	0.0800254			mito protein domain
	Q99KS6;Q99KS6-2	Manganese-dependent ADP-ribose/CDP-alcohol diphosphatase;Isoform 2 of Manganese-dependent ADP-ribose/CDP-alcohol diphosphatase	ADPRM_MOUSE	Adprm	-0.482515	0.0279451	2.45828
	Q8CG72	ADP-ribose glycohydrolase ARH3	ADPRS_MOUSE	Adprs	-0.0765266	0.144506	0.343058			targetP signal, mito protein domain
	Q9JKV1	Proteasomal ubiquitin receptor ADRM1	ADRM1_MOUSE	Adrm1	-0.233834	0.0358811	1.25899
	P54822	Adenylosuccinate lyase	PUR8_MOUSE	Adsl	-0.316187	0.0301423	1.44304			Rickettsial homolog, mito protein domain, induction, coexpression
	P28650;P28650-2	Adenylosuccinate synthetase isozyme 1;Isoform 2 of Adenylosuccinate synthetase isozyme 1	PURA1_MOUSE	Adss1	-0.585836	0.0535202	0.949321			induction
	P46664	Adenylosuccinate synthetase isozyme 2	PURA2_MOUSE	Adss2	-0.0526677	0.178843	0.221759			induction
	Q9Z248;Q9Z248-2	Zinc finger protein AEBP2;Isoform 2 of Zinc finger protein AEBP2	AEBP2_MOUSE	Aebp2	-0.163833	0.0763593	0.719171
	Q9CZI9	Apoptosis-enhancing nuclease	AEN_MOUSE	Aen	-0.510131	0.0279451	2.04856			Rickettsial homolog, mito protein domain
	Q9QZQ1;Q9QZQ1-2	Afadin;Isoform 1 of Afadin	AFAD_MOUSE	Afdn	0.461403	0.166031	0.263789			mito protein domain
	Q920A7	AFG3-like protein 1	AFG31_MOUSE	Afg3l1	-0.336108	0.0279451	1.89809		MitoCarta3.0	literature, targetP signal, yeast mito homolog, Rickettsial homolog, mito protein domain+, coexpression, MS/MS+	MIM	Protein import, sorting and homeostasis > Protein homeostasis > Proteases
	Q8JZQ2	AFG3-like protein 2	AFG32_MOUSE	Afg3l2	-0.249987	0.0279451	1.73887		MitoCarta3.0	literature, APEX_matrix, targetP signal, yeast mito homolog, Rickettsial homolog, mito protein domain+, induction, coexpression++, MS/MS++	MIM	Protein import, sorting and homeostasis > Protein homeostasis > Proteases
	Q8K4H1	Kynurenine formamidase	KFA_MOUSE	Afmid	-0.153414	0.044927	1.07431			mito protein domain, coexpression
	Q80WT5;Q80WT5-2	Aftiphilin;Isoform 2 of Aftiphilin	AFTIN_MOUSE	Aftph	1.11012	0.0511961	0.98368
	Q64191	N(4)-(beta-N-acetylglucosaminyl)-L-asparaginase	ASPG_MOUSE	Aga	-0.272	0.0289943	1.51053
	Q3UHD9;Q3UHD9-2	Arf-GAP with GTPase, ANK repeat and PH domain-containing protein 2;Isoform 2 of Arf-GAP with GTPase, ANK repeat and PH domain-containing protein 2	AGAP2_MOUSE	Agap2	-0.234651	0.0390447	1.18859			targetP signal, mito protein domain
	Q8VHH5	Arf-GAP with GTPase, ANK repeat and PH domain-containing protein 3	AGAP3_MOUSE	Agap3	-0.718119	0.086493	0.644615
	Q8K2K6;Q8K2K6-1;Q8K2K6-3	Arf-GAP domain and FG repeat-containing protein 1;Isoform 1 of Arf-GAP domain and FG repeat-containing protein 1;Isoform 3 of Arf-GAP domain and FG repeat-containing protein 1	AGFG1_MOUSE	Agfg1	-0.143832	0.0831168	0.668776
	Q80WC7;Q80WC7-2	Arf-GAP domain and FG repeat-containing protein 2;Isoform 2 of Arf-GAP domain and FG repeat-containing protein 2	AGFG2_MOUSE	Agfg2	-0.274413	0.0288563	1.5261
	Q7TN31	Angiogenic factor with G patch and FHA domains 1	AGGF1_MOUSE	Aggf1	-0.043591	0.20319	0.149982			mito protein domain, induction
	Q9ESW4	Acylglycerol kinase, mitochondrial	AGK_MOUSE	Agk	-0.211967	0.0405081	1.15769		MitoCarta3.0	literature, APEX_IMS, mito protein domain	MIM	Protein import, sorting and homeostasis > Protein import and sorting > TIM22 carrier pathway | Metabolism > Lipid metabolism > Phospholipid metabolism
	F8VPN4	Amylo-1,6-glucosidase, 4-alpha-glucanotransferase	F8VPN4_MOUSE	Agl	-0.829407	0.0289943	1.5102			yeast mito homolog, mito protein domain, induction
	Q8CJG0	Protein argonaute-2	AGO2_MOUSE	Ago2	-0.34795	0.0279451	1.9621
	O35083	1-acyl-sn-glycerol-3-phosphate acyltransferase alpha	PLCA_MOUSE	Agpat1	-0.0804927	0.1622	0.277832			Rickettsial homolog, mito protein domain
	Q9D517	1-acyl-sn-glycerol-3-phosphate acyltransferase gamma	PLCC_MOUSE	Agpat3	-0.435371	0.0279451	2.32401			mito protein domain, induction, coexpression
	Q8K4X7	1-acyl-sn-glycerol-3-phosphate acyltransferase delta	PLCD_MOUSE	Agpat4	-0.997832	0.0589991	0.882321		MitoCarta3.0	literature,mito protein domain, induction	MOM	Metabolism > Lipid metabolism > Cardiolipin synthesis | Metabolism > Lipid metabolism > Phospholipid metabolism
	Q9D1E8	1-acyl-sn-glycerol-3-phosphate acyltransferase epsilon	PLCE_MOUSE	Agpat5	-0.328639	0.0328679	1.3484		MitoCarta3.0	literature, mito protein domain, induction, MS/MS	MOM	Metabolism > Lipid metabolism > Cardiolipin synthesis | Metabolism > Lipid metabolism > Phospholipid metabolism
	Q8C0I1	Alkyldihydroxyacetonephosphate synthase, peroxisomal	ADAS_MOUSE	Agps	-0.241391	0.0291707	1.49783			yeast mito homolog+, mito protein domain
	Q8CJF7	Protein ELYS	ELYS_MOUSE	Ahctf1	-0.134863	0.0787103	0.700993
	P50247	Adenosylhomocysteinase	SAHH_MOUSE	Ahcy	-0.219568	0.0334171	1.3215			mito protein domain+
	Q80SW1	S-adenosylhomocysteine hydrolase-like protein 1	SAHH2_MOUSE	Ahcyl1	-0.0151455	0.250264	0.0310184		MitoCarta3.0	mito protein domain+, induction	MOM	Mitochondrial dynamics and surveillance > Organelle contact sites
	Q68FL4	Putative adenosylhomocysteinase 3	SAHH3_MOUSE	Ahcyl2	-0.11532	0.0872482	0.639933			mito protein domain
	Q6PAL7	AT-hook DNA-binding motif-containing protein 1	AHDC1_MOUSE	Ahdc1	-0.199329	0.08255	0.672848
	E9Q616	AHNAK nucleoprotein (desmoyokin)	E9Q616_MOUSE	Ahnak	-0.309391	0.0288244	1.54432			mito protein domain
	E9PYB0;F7CVJ5;F7DBB3	AHNAK nucleoprotein 2 (Fragment)	E9PYB0_MOUSE;F7CVJ5_MOUSE;F7DBB3_MOUSE	Ahnak2	-1.10706	0.0293466	1.48464
	Q8BK64	Activator of 90 kDa heat shock protein ATPase homolog 1	AHSA1_MOUSE	Ahsa1	-0.170661	0.0416489	1.13661
	Q8N9S3;Q8N9S3-2;Q8N9S3-3	Activator of 90 kDa heat shock protein ATPase homolog 2;Isoform 2 of Activator of 90 kDa heat shock protein ATPase homolog 2;Isoform 3 of Activator of 90 kDa heat shock protein ATPase homolog 2	AHSA2_MOUSE	Ahsa2	-0.184357	0.0861917	0.647636
	Q8C4Q6	Axin interactor, dorsalization-associated protein	AIDA_MOUSE	Aida	-0.919911	0.0279451	3.77547			targetP signal
	Q9Z0X1	Apoptosis-inducing factor 1, mitochondrial	AIFM1_MOUSE	Aifm1	-0.159432	0.0677216	0.796468		MitoCarta3.0	literature, APEX_IMS, targetP signal, yeast mito homolog, mito protein domain, induction, coexpression++, MS/MS++	MIM	Protein import, sorting and homeostasis > Protein import and sorting > MIA40 | OXPHOS > Complex I > CI assembly factors | OXPHOS > OXPHOS assembly factors | Mitochondrial dynamics and surveillance > Apoptosis
	Q91VJ1	Interferon-inducible protein AIM2	AIM2_MOUSE	Aim2	-0.735389	0.0279451	2.63336
	P31230	Aminoacyl tRNA synthase complex-interacting multifunctional protein 1	AIMP1_MOUSE	Aimp1	-0.239328	0.0310905	1.40654
	Q8R010	Aminoacyl tRNA synthase complex-interacting multifunctional protein 2	AIMP2_MOUSE	Aimp2	-0.287368	0.0279451	1.66346			mito protein domain
	O08915	AH receptor-interacting protein	AIP_MOUSE	Aip	-0.247058	0.0310673	1.40782			yeast mito homolog+, mito protein domain
	Q9WTP6;Q9WTP6-2	Adenylate kinase 2, mitochondrial;Isoform 2 of Adenylate kinase 2, mitochondrial	KAD2_MOUSE	Ak2	0.00349669	0.257558	0.0147229		MitoCarta3.0	literature, APEX_IMS, yeast mito homolog, Rickettsial homolog, mito protein domain, coexpression+, MS/MS++	IMS	Metabolism > Nucleotide metabolism > Nucleotide synthesis and processing
	Q9WTP7	GTP:AMP phosphotransferase AK3, mitochondrial	KAD3_MOUSE	Ak3	-0.0597644	0.163614	0.272558		MitoCarta3.0	literature, APEX_matrix, targetP signal, yeast mito homolog, Rickettsial homolog, mito protein domain, induction, coexpression, MS/MS++	Matrix	Metabolism > Nucleotide metabolism > Nucleotide synthesis and processing
	Q9WUR9	Adenylate kinase 4, mitochondrial	KAD4_MOUSE	Ak4	-0.291852	0.0352669	1.27282		MitoCarta3.0	APEX_matrix, yeast mito homolog++, Rickettsial homolog, mito protein domain, MS/MS++	Matrix	Metabolism > Nucleotide metabolism > Nucleotide synthesis and processing
	Q8VCP8	Adenylate kinase isoenzyme 6	KAD6_MOUSE	Ak6	-0.159237	0.0861917	0.647761			Rickettsial homolog, mito protein domain
	O08715;O08715-4	A-kinase anchor protein 1, mitochondrial;Isoform 4 of A-kinase anchor protein 1, mitochondrial	AKAP1_MOUSE	Akap1	-0.538529	0.0279451	2.38586		MitoCarta3.0	literature, mito protein domain, induction, coexpression++, MS/MS+	MOM	Signaling > cAMP-PKA signaling
	O88845	A-kinase anchor protein 10, mitochondrial	AKA10_MOUSE	Akap10	-1.24448	0.0337336	1.31382		MitoCarta3.0	literature, mito protein domain	MOM	Signaling > cAMP-PKA signaling
	E9Q774;E9Q777	A kinase (PRKA) anchor protein 11	E9Q774_MOUSE;E9Q777_MOUSE	Akap11	-0.216912	0.113554	0.478248
	E9Q394-2	Isoform 2 of A-kinase anchor protein 13	AKP13_MOUSE	Akap13	-0.100496	0.0814646	0.681252			mito protein domain
	Q9DBR0	A-kinase anchor protein 8	AKAP8_MOUSE	Akap8	-0.0930481	0.142498	0.350425
	Q9R0L7	A-kinase anchor protein 8-like	AKP8L_MOUSE	Akap8l	0.249974	0.109676	0.498647
	Q80VW7	Microtubule organization protein AKNA	AKNA_MOUSE	Akna	-0.249108	0.0288244	1.5374
	Q9JII6	Aldo-keto reductase family 1 member A1	AK1A1_MOUSE	Akr1a1	-0.254985	0.0279451	1.6997
	P45376	Aldo-keto reductase family 1 member B1	ALDR_MOUSE	Akr1b1	-0.263933	0.0288244	1.53696
	G5E895	Aldo-keto reductase family 1, member B10 (aldose reductase)	G5E895_MOUSE	Akr1b10	-0.00566633	0.260266	0.00859859		MitoCarta3.0	induction, coexpression, MS/MS++	unknown	Metabolism > Vitamin metabolism > Vitamin A metabolism | Metabolism > Detoxification > Xenobiotic metabolism
	Q8VC28	Aldo-keto reductase family 1 member C13	AK1CD_MOUSE	Akr1c13	0.0756628	0.157101	0.295848
	Q9DCT1	1,5-anhydro-D-fructose reductase	AKCL2_MOUSE	Akr1e2	0.0710377	0.172834	0.241448			coexpression
	Q8CG76	Aflatoxin B1 aldehyde reductase member 2	ARK72_MOUSE	Akr7a2	-0.139397	0.0522114	0.968211		MitoCarta3.0	APEX_matrix, targetP signal+, coexpression, MS/MS++	Matrix	Metabolism > Amino acid metabolism > GABA metabolism | Metabolism > Detoxification > Xenobiotic metabolism
	P31750	RAC-alpha serine/threonine-protein kinase	AKT1_MOUSE	Akt1	-0.186538	0.0391094	1.18675			mito protein domain
	Q9D1F4	Proline-rich AKT1 substrate 1	AKTS1_MOUSE	Akt1s1	-0.288941	0.0440657	1.08833			coexpression
	Q60823	RAC-beta serine/threonine-protein kinase	AKT2_MOUSE	Akt2	-0.394173	0.0279451	2.22798			mito protein domain, coexpression
	Q64362	AKT-interacting protein	AKTIP_MOUSE	Aktip	-1.09528	0.0281378	1.6433
	P10518	Delta-aminolevulinic acid dehydratase	HEM2_MOUSE	Alad	-0.718631	0.0279451	2.22836			Rickettsial homolog, coexpression
	P07724	Albumin	ALBU_MOUSE	Alb	0.18752	0.100651	0.55024
	Q61490	CD166 antigen	CD166_MOUSE	Alcam	-0.459847	0.0279451	2.63756
	Q571I9	Aldehyde dehydrogenase family 16 member A1	A16A1_MOUSE	Aldh16a1	-0.12832	0.0893136	0.623656			yeast mito homolog, mito protein domain, coexpression
	Q9Z110	Delta-1-pyrroline-5-carboxylate synthase	P5CS_MOUSE	Aldh18a1	-0.364103	0.0279451	1.67613		MitoCarta3.0	literature, targetP signal+, Rickettsial homolog, mito protein domain, coexpression, MS/MS++	Matrix	Metabolism > Amino acid metabolism > Proline metabolism
	Q9CZS1	Aldehyde dehydrogenase X, mitochondrial	AL1B1_MOUSE	Aldh1b1	-0.0943891	0.177863	0.224853		MitoCarta3.0	literature, APEX_matrix, targetP signal, yeast mito homolog+, mito protein domain, MS/MS++	Matrix	Metabolism > Detoxification > Xenobiotic metabolism
	P47738	Aldehyde dehydrogenase, mitochondrial	ALDH2_MOUSE	Aldh2	-0.44025	0.140875	0.35715		MitoCarta3.0	literature, APEX_matrix, targetP signal, yeast mito homolog+, mito protein domain, coexpression, MS/MS++	Matrix	Metabolism > Detoxification > Xenobiotic metabolism
	P47740	Aldehyde dehydrogenase family 3 member A2	AL3A2_MOUSE	Aldh3a2	-0.191141	0.054049	0.94244		MitoCarta3.0	targetP signal+, yeast mito homolog, mito protein domain, coexpression	Membrane	Metabolism > Detoxification > ROS and glutathione metabolism
	Q8CHT0	Delta-1-pyrroline-5-carboxylate dehydrogenase, mitochondrial	AL4A1_MOUSE	Aldh4a1	-0.0216859	0.236948	0.0621135		MitoCarta3.0	literature, APEX_matrix, targetP signal+, yeast mito homolog++, mito protein domain, coexpression, MS/MS++	Matrix	Metabolism > Amino acid metabolism > Proline metabolism | Metabolism > Amino acid metabolism > Glyoxylate metabolism
	Q9DBF1-2	Isoform 2 of Alpha-aminoadipic semialdehyde dehydrogenase	AL7A1_MOUSE	Aldh7a1	-0.394307	0.0326056	1.35701		MitoCarta3.0	literature, APEX_matrix, targetP signal, yeast mito homolog, mito protein domain, MS/MS++	Matrix	Metabolism > Amino acid metabolism > Lysine metabolism | Metabolism > Amino acid metabolism > Glycine metabolism | Metabolism > Vitamin metabolism > Choline and betaine metabolism | Metabolism > Vitamin metabolism > Folate and 1-C metabolism | Metabolism > Detoxification > ROS and glutathione metabolism
	Q9JLJ2	4-trimethylaminobutyraldehyde dehydrogenase	AL9A1_MOUSE	Aldh9a1	-0.154514	0.055256	0.927892		MitoCarta3.0	APEX_matrix, targetP signal, yeast mito homolog+, mito protein domain, coexpression, MS/MS++	Matrix	Metabolism > Amino acid metabolism > GABA metabolism | Metabolism > Detoxification > ROS and glutathione metabolism
	P05064	Fructose-bisphosphate aldolase A	ALDOA_MOUSE	Aldoa	-0.375381	0.0288324	1.53124
	P05063	Fructose-bisphosphate aldolase C	ALDOC_MOUSE	Aldoc	-0.301513	0.0561321	0.917874
	Q921Q3;Q921Q3-2	Chitobiosyldiphosphodolichol beta-mannosyltransferase;Isoform 2 of Chitobiosyldiphosphodolichol beta-mannosyltransferase	ALG1_MOUSE	Alg1	0.0662918	0.204875	0.14585
	Q3UGP8	Putative Dol-P-Glc:Glc(2)Man(9)GlcNAc(2)-PP-Dol alpha-1,2-glucosyltransferase	AG10B_MOUSE	Alg10b	-0.386171	0.0368275	1.23591
	Q3TZM9	GDP-Man:Man(3)GlcNAc(2)-PP-Dol alpha-1,2-mannosyltransferase	ALG11_MOUSE	Alg11	-0.334736	0.0288563	1.52505
	Q9DBE8	Alpha-1,3/1,6-mannosyltransferase ALG2	ALG2_MOUSE	Alg2	-0.43194	0.0279451	1.69392			targetP signal, Rickettsial homolog
	Q8K2A8	Dol-P-Man:Man(5)GlcNAc(2)-PP-Dol alpha-1,3-mannosyltransferase	ALG3_MOUSE	Alg3	-0.53109	0.0279451	1.97977			targetP signal, coexpression
	Q9DB25	Dolichyl-phosphate beta-glucosyltransferase	ALG5_MOUSE	Alg5	-0.286798	0.0283184	1.61686			Rickettsial homolog
	Q6P8H8	Probable dolichyl pyrophosphate Glc1Man9GlcNAc2 alpha-1,3-glucosyltransferase	ALG8_MOUSE	Alg8	-0.24355	0.0643816	0.828379
	Q8VDI9	Alpha-1,2-mannosyltransferase ALG9	ALG9_MOUSE	Alg9	-0.161527	0.145363	0.339432			coexpression
	Q8K1E6	Alpha-ketoglutarate-dependent dioxygenase alkB homolog 3	ALKB3_MOUSE	Alkbh3	-0.325524	0.0288244	1.54062			mito protein domain, induction, coexpression
	Q3TSG4	RNA demethylase ALKBH5	ALKB5_MOUSE	Alkbh5	-0.241618	0.0324822	1.3603			mito protein domain
	Q8K2U2	Alpha-ketoglutarate-dependent dioxygenase alkB homolog 6	ALKB6_MOUSE	Alkbh6	-0.254558	0.0407951	1.15272			mito protein domain, induction
	Q80Y20;Q80Y20-2	Alkylated DNA repair protein alkB homolog 8;Isoform 2 of Alkylated DNA repair protein alkB homolog 8	ALKB8_MOUSE	Alkbh8	-0.436072	0.10271	0.538228			mito protein domain
	O08583	THO complex subunit 4	THOC4_MOUSE	Alyref	0.0350819	0.2249	0.0924153			mito protein domain
	A2AH22;A2AH22-2;A2AH22-5;A2AH22-6;A2AH22-7	Activating molecule in BECN1-regulated autophagy protein 1;Isoform 2 of Activating molecule in BECN1-regulated autophagy protein 1;Isoform 5 of Activating molecule in BECN1-regulated autophagy protein 1;Isoform 6 of Activating molecule in BECN1-regulated autophagy protein 1;Isoform 7 of Activating molecule in BECN1-regulated autophagy protein 1	AMRA1_MOUSE	Ambra1	-0.226759	0.0421809	1.12303			mito protein domain
	Q8JZV7	N-acetylglucosamine-6-phosphate deacetylase	NAGA_MOUSE	Amdhd2	-0.192497	0.0329794	1.34425
	Q9R049-2	Isoform 2 of E3 ubiquitin-protein ligase AMFR	AMFR_MOUSE	Amfr	-0.296695	0.0300456	1.44804			mito protein domain, coexpression
	Q8JZZ6	AMMECR1-like protein	AMERL_MOUSE	Ammecr1l	-0.324897	0.0425296	1.11502
	Q9DBT5	AMP deaminase 2	AMPD2_MOUSE	Ampd2	-0.141505	0.170003	0.250776			targetP signal
	P53995	Anaphase-promoting complex subunit 1	APC1_MOUSE	Anapc1	-0.240283	0.0282128	1.62591
	Q9CPX9	Anaphase-promoting complex subunit 11	APC11_MOUSE	Anapc11	-0.297346	0.0780833	0.705313
	Q8BZQ7	Anaphase-promoting complex subunit 2	ANC2_MOUSE	Anapc2	-0.274761	0.0281378	1.63674
	Q91W96	Anaphase-promoting complex subunit 4	APC4_MOUSE	Anapc4	-0.341232	0.0279451	2.2244
	Q8BTZ4	Anaphase-promoting complex subunit 5	APC5_MOUSE	Anapc5	-0.0761928	0.20048	0.158071			mito protein domain, coexpression
	Q9WVM3	Anaphase-promoting complex subunit 7	APC7_MOUSE	Anapc7	-0.253826	0.105088	0.524842			mito protein domain
	Q8K1C0;Q8K1C0-2;Q8K1C0-3	Protein angel homolog 2;Isoform 2 of Protein angel homolog 2;Isoform 3 of Protein angel homolog 2	ANGE2_MOUSE	Angel2	-0.227942	0.111892	0.486684		MitoCarta3.0	APEX_matrix, mito protein domain, MS/MS	Matrix	Mitochondrial central dogma > mtRNA metabolism > mt-mRNA modifications
	Q810B6	Rabankyrin-5	ANFY1_MOUSE	Ankfy1	-0.571146	0.0285336	1.57562			Rickettsial homolog, mito protein domain
	E9PUR0;E9Q1M6	Ankyrin repeat and KH domain-containing 1	E9PUR0_MOUSE;E9Q1M6_MOUSE	Ankhd1	-0.411155	0.0279451	2.15641			Rickettsial homolog, mito protein domain
	Q6P1H6	Ankyrin repeat and LEM domain-containing protein 2	ANKL2_MOUSE	Ankle2	-0.262114	0.0326224	1.35491
	Q3TPE9	Ankyrin repeat and MYND domain-containing protein 2	ANKY2_MOUSE	Ankmy2	-0.420053	0.0279451	1.69417			Rickettsial homolog, mito protein domain
	Q99LW0	Ankyrin repeat domain-containing protein 10	ANR10_MOUSE	Ankrd10	-0.177644	0.0509888	0.986154			Rickettsial homolog, mito protein domain
	E9Q4F7	Ankyrin repeat domain-containing protein 11	ANR11_MOUSE	Ankrd11	-0.247185	0.0618652	0.854652			Rickettsial homolog, mito protein domain
	Q80UP5	Ankyrin repeat domain-containing protein 13A	AN13A_MOUSE	Ankrd13a	-0.370103	0.0279451	2.21149			mito protein domain
	Q99NH0	Ankyrin repeat domain-containing protein 17	ANR17_MOUSE	Ankrd17	-0.473249	0.0279451	2.47254			Rickettsial homolog, mito protein domain
	Q505D1	Serine/threonine-protein phosphatase 6 regulatory ankyrin repeat subunit A	ANR28_MOUSE	Ankrd28	-0.311169	0.0286083	1.55898			Rickettsial homolog, mito protein domain
	B2RXR6	Serine/threonine-protein phosphatase 6 regulatory ankyrin repeat subunit B	ANR44_MOUSE	Ankrd44	-0.326436	0.0279451	1.81326			Rickettsial homolog, mito protein domain
	Q8BTZ5	Ankyrin repeat domain-containing protein 46	ANR46_MOUSE	Ankrd46	-0.100306	0.227469	0.085593			Rickettsial homolog, mito protein domain
	Q8VE42	Ankyrin repeat domain-containing protein 49	ANR49_MOUSE	Ankrd49	-0.229863	0.0979383	0.565689			Rickettsial homolog, mito protein domain
	Q8BTI7	Serine/threonine-protein phosphatase 6 regulatory ankyrin repeat subunit C	ANR52_MOUSE	Ankrd52	-0.522638	0.0279451	1.84412			Rickettsial homolog, mito protein domain
	Q91WK7	Ankyrin repeat domain-containing protein 54	ANR54_MOUSE	Ankrd54	-0.194845	0.157053	0.296144			Rickettsial homolog, mito protein domain
	P59672;P59672-2	Ankyrin repeat and SAM domain-containing protein 1A;Isoform 2 of Ankyrin repeat and SAM domain-containing protein 1A	ANS1A_MOUSE	Anks1a	-0.414412	0.0279451	1.65886			Rickettsial homolog, mito protein domain, coexpression
	Q80UU1	Ankyrin repeat and zinc finger domain-containing protein 1	ANKZ1_MOUSE	Ankzf1	-0.0494363	0.179982	0.218009			yeast mito homolog, mito protein domain, induction
	Q8K298	Anillin	ANLN_MOUSE	Anln	-0.300546	0.0758754	0.722603			mito protein domain
	Q8BH79;Q8BH79-2	Anoctamin-10;Isoform 2 of Anoctamin-10	ANO10_MOUSE	Ano10	-0.391493	0.029338	1.48591			coexpression
	Q6P9J9	Anoctamin-6	ANO6_MOUSE	Ano6	-0.248364	0.0286659	1.55467
	O35381	Acidic leucine-rich nuclear phosphoprotein 32 family member A	AN32A_MOUSE	Anp32a	-0.00681476	0.253561	0.0236741			mito protein domain
	Q9EST5;Q9EST5-2	Acidic leucine-rich nuclear phosphoprotein 32 family member B;Isoform 2 of Acidic leucine-rich nuclear phosphoprotein 32 family member B	AN32B_MOUSE	Anp32b	-0.0998423	0.145427	0.339115			mito protein domain, MS/MS
	P97822	Acidic leucine-rich nuclear phosphoprotein 32 family member E	AN32E_MOUSE	Anp32e	-0.153208	0.0833	0.667535			mito protein domain
	Q501J2	Adenine nucleotide translocase lysine N-methyltransferase	ANKMT_MOUSE	Antkmt	-0.0918648	0.163614	0.272581		MitoCarta3.0	literature,coexpression, MS/MS	MIM	Metabolism > Nucleotide metabolism
	P10107	Annexin A1	ANXA1_MOUSE	Anxa1	-1.06467	0.0279451	1.96141			MS/MS
	P97384	Annexin A11	ANX11_MOUSE	Anxa11	-0.219241	0.0311613	1.40444
	P07356	Annexin A2	ANXA2_MOUSE	Anxa2	-0.502952	0.0279451	2.03198
	P97429	Annexin A4	ANXA4_MOUSE	Anxa4	-0.213775	0.0942348	0.589409
	P48036	Annexin A5	ANXA5_MOUSE	Anxa5	-0.754232	0.0279451	2.52439
	P14824	Annexin A6	ANXA6_MOUSE	Anxa6	-0.279648	0.0285578	1.5668
	Q07076	Annexin A7	ANXA7_MOUSE	Anxa7	-0.440217	0.0279451	2.14831
	O35643	AP-1 complex subunit beta-1	AP1B1_MOUSE	Ap1b1	-0.270686	0.0279451	1.69583
	P22892	AP-1 complex subunit gamma-1	AP1G1_MOUSE	Ap1g1	-0.310347	0.0279451	1.93972			targetP signal, coexpression
	O88512	AP-1 complex subunit gamma-like 2	AP1G2_MOUSE	Ap1g2	0.0391472	0.205825	0.143362
	P35585	AP-1 complex subunit mu-1	AP1M1_MOUSE	Ap1m1	-0.107256	0.0873835	0.638898
[truncated: 6,663 more rows]

[truncated: 1 more sheets: Fig 4E FA & cholesterol KEGG]
