# Supplementary material for: PIM kinase control of CD8 T cell protein synthesis and cell trafficking
Source: eLife. 2025 May 13;13:RP98622. doi: 10.7554/eLife.98622 (PMC12074636; doi:10.7554/eLife.98622)
Supplement: Supplementary file 5. [file elife-98622-supp5.xlsx]

## Sheet: estimated copies per cell
					ESTIMATED COPY NUMBER PER CELL
					DMSO			PIM447			AZD1208
	Fasta headers	Protein_IDs (uniprot)	Protein names	Gene names	BR1	BR2	BR3	BR1	BR2	BR3	BR1	BR2	BR3		Razor + unique peptides	Unique peptides	Sequence coverage [%]
	sp|P58742|AAAS_MOUSE Aladin OS=Mus musculus OX=10090 GN=Aaas PE=1 SV=1	P58742	Aladin	Aaas	15533	7843	13942	14819	3353	8652	15369	14707	5123		7	7	22.5
	sp|Q9D2R0|AACS_MOUSE Acetoacetyl-CoA synthetase OS=Mus musculus OX=10090 GN=Aacs PE=1 SV=1	Q9D2R0	Acetoacetyl-CoA synthetase	Aacs	56093	56715	55390	84288	63224	64221	76690	31522	50366		21	21	36.5
	sp|Q3UHJ0-2|AAK1_MOUSE Isoform 2 of AP2-associated protein kinase 1 OS=Mus musculus OX=10090 GN=Aak1;sp|Q3UHJ0|AAK1_MOUSE AP2-associated protein kinase 1 OS=Mus musculus OX=10090 GN=Aak1 PE=1 SV=2	Q3UHJ0-2;Q3UHJ0	AP2-associated protein kinase 1	Aak1	19024	16536	23007	20144	18448	18503	18803	11613	16114		15	14	32.2
	sp|Q8BGQ7|SYAC_MOUSE Alanine--tRNA ligase, cytoplasmic OS=Mus musculus OX=10090 GN=Aars PE=1 SV=1	Q8BGQ7	Alanine--tRNA ligase, cytoplasmic	Aars	99888	89503	98799	68633	70986	89153	72233	63260	85585		38	38	50.1
	sp|Q3THG9|AASD1_MOUSE Alanyl-tRNA editing protein Aarsd1 OS=Mus musculus OX=10090 GN=Aarsd1 PE=1 SV=2	Q3THG9	Alanyl-tRNA editing protein Aarsd1	Aarsd1	16830	9230	18201	10544	5606	4683	8237	6733	6990		10	10	34.5
	sp|Q9JKX4|AATF_MOUSE Protein AATF OS=Mus musculus OX=10090 GN=Aatf PE=1 SV=1;sp|Q9JKX4-2|AATF_MOUSE Isoform 2 of Protein AATF OS=Mus musculus OX=10090 GN=Aatf;sp|Q9JKX4-3|AATF_MOUSE Isoform 3 of Protein AATF OS=Mus musculus OX=10090 GN=Aatf	Q9JKX4;Q9JKX4-2;Q9JKX4-3	Protein AATF	Aatf	24894	24026	23028	20626	16145	16026	21561	22625	15331		8	8	25.1
	sp|P06795|MDR1B_MOUSE ATP-dependent translocase ABCB1 OS=Mus musculus OX=10090 GN=Abcb1b PE=1 SV=1	P06795;P21447;P21440	Multidrug resistance protein 1B	Abcb1b	2109	675	3017	2148	1254	2251	1537	1798	1512		6	6	6.4
	sp|Q61102|ABCB7_MOUSE ATP-binding cassette sub-family B member 7, mitochondrial OS=Mus musculus OX=10090 GN=Abcb7 PE=1 SV=3	Q61102	ATP-binding cassette sub-family B member 7, mitochondrial	Abcb7	5818	2533	2266	4267	3810	3456	4177	2575	3237		5	5	11.6
	sp|P48410|ABCD1_MOUSE ATP-binding cassette sub-family D member 1 OS=Mus musculus OX=10090 GN=Abcd1 PE=1 SV=1	P48410	ATP-binding cassette sub-family D member 1	Abcd1	1790	1028	1378	1198	1050	753	1438	790	705		1	1	2.7
	sp|P61222|ABCE1_MOUSE ATP-binding cassette sub-family E member 1 OS=Mus musculus OX=10090 GN=Abce1 PE=1 SV=1	P61222	ATP-binding cassette sub-family E member 1	Abce1	144510	157033	172957	133936	116015	118763	154370	121761	112678		27	27	46.1
	sp|Q6P542|ABCF1_MOUSE ATP-binding cassette sub-family F member 1 OS=Mus musculus OX=10090 GN=Abcf1 PE=1 SV=1	Q6P542	ATP-binding cassette sub-family F member 1	Abcf1	64231	59596	66100	57182	50690	43805	63682	47292	53625		21	21	37.3
	sp|Q99LE6|ABCF2_MOUSE ATP-binding cassette sub-family F member 2 OS=Mus musculus OX=10090 GN=Abcf2 PE=1 SV=1	Q99LE6	ATP-binding cassette sub-family F member 2	Abcf2	98504	121321	164937	84014	70300	56925	108934	55881	80912		26	26	43.9
	sp|Q8K268|ABCF3_MOUSE ATP-binding cassette sub-family F member 3 OS=Mus musculus OX=10090 GN=Abcf3 PE=1 SV=1	Q8K268	ATP-binding cassette sub-family F member 3	Abcf3	4040	2634	5593	2340	641	4496	4711	592	1187		5	5	9.7
	sp|Q99LR1|ABD12_MOUSE Lysophosphatidylserine lipase ABHD12 OS=Mus musculus OX=10090 GN=Abhd12 PE=1 SV=2;sp|Q99LR1-2|ABD12_MOUSE Isoform 2 of Lysophosphatidylserine lipase ABHD12 OS=Mus musculus OX=10090 GN=Abhd12	Q99LR1;Q99LR1-2	Monoacylglycerol lipase ABHD12	Abhd12	4486	0	4297	6431	3822	4370	3805	3881	3010		4	4	14.1
	sp|Q8CBW3-5|ABI1_MOUSE Isoform 5 of Abl interactor 1 OS=Mus musculus OX=10090 GN=Abi1;sp|Q8CBW3-2|ABI1_MOUSE Isoform 2 of Abl interactor 1 OS=Mus musculus OX=10090 GN=Abi1;sp|Q8CBW3-4|ABI1_MOUSE Isoform 4 of Abl interactor 1 OS=Mus musculus OX=10090 GN=Abi	Q8CBW3-5;Q8CBW3-2;Q8CBW3-4;Q8CBW3-3;Q8CBW3	Abl interactor 1	Abi1	19580	20003	38868	18872	14273	16239	45889	19455	25816		7	5	25.3
	sp|Q8K4G5-3|ABLM1_MOUSE Isoform 3 of Actin-binding LIM protein 1 OS=Mus musculus OX=10090 GN=Ablim1;sp|Q8K4G5-2|ABLM1_MOUSE Isoform 2 of Actin-binding LIM protein 1 OS=Mus musculus OX=10090 GN=Ablim1;sp|Q8K4G5|ABLM1_MOUSE Actin-binding LIM protein 1 OS=Mus	Q8K4G5-3;Q8K4G5-2;Q8K4G5;Q8K4G5-4	Actin-binding LIM protein 1	Ablim1	0	0	0	0	2791	3069	1277	1837	1039		3	3	7.3
	sp|Q5SSL4-4|ABR_MOUSE Isoform 4 of Active breakpoint cluster region-related protein OS=Mus musculus OX=10090 GN=Abr;sp|Q5SSL4|ABR_MOUSE Active breakpoint cluster region-related protein OS=Mus musculus OX=10090 GN=Abr PE=1 SV=1;sp|Q5SSL4-2|ABR_MOUSE Isoform	Q5SSL4-4;Q5SSL4;Q5SSL4-2;Q5SSL4-3;Q6PAJ1	Active breakpoint cluster region-related protein	Abr	7334	5326	11908	11815	10978	9445	9067	9816	7719		7	7	14
	sp|Q4KML4|ABRAL_MOUSE Costars family protein ABRACL OS=Mus musculus OX=10090 GN=Abracl PE=1 SV=1	Q4KML4	Costars family protein ABRACL	Abracl	108492	36260	44834	48476	34137	93956	53437	132942	21849		3	3	46.9
	sp|Q921H8|THIKA_MOUSE 3-ketoacyl-CoA thiolase A, peroxisomal OS=Mus musculus OX=10090 GN=Acaa1a PE=1 SV=1;sp|Q8VCH0|THIKB_MOUSE 3-ketoacyl-CoA thiolase B, peroxisomal OS=Mus musculus OX=10090 GN=Acaa1b PE=1 SV=1	Q921H8;Q8VCH0	3-ketoacyl-CoA thiolase A, peroxisomal;3-ketoacyl-CoA thiolase B, peroxisomal	Acaa1a;Acaa1b	43001	41559	68534	65124	74499	48954	59168	44440	32302		13	13	52.6
	sp|Q8BWT1|THIM_MOUSE 3-ketoacyl-CoA thiolase, mitochondrial OS=Mus musculus OX=10090 GN=Acaa2 PE=1 SV=3	Q8BWT1	3-ketoacyl-CoA thiolase, mitochondrial	Acaa2	70318	61491	83627	68652	71341	89040	57847	64384	60175		20	20	66.2
	sp|Q5SWU9|ACACA_MOUSE Acetyl-CoA carboxylase 1 OS=Mus musculus OX=10090 GN=Acaca PE=1 SV=1;sp|Q5SWU9-2|ACACA_MOUSE Isoform 2 of Acetyl-CoA carboxylase 1 OS=Mus musculus OX=10090 GN=Acaca	Q5SWU9;Q5SWU9-2	Acetyl-CoA carboxylase 1;Biotin carboxylase	Acaca	28689	15232	23718	19685	17641	17883	23563	19020	18816		60	56	36.3
	sp|E9Q4Z2|ACACB_MOUSE Acetyl-CoA carboxylase 2 OS=Mus musculus OX=10090 GN=Acacb PE=1 SV=1	E9Q4Z2	Acetyl-CoA carboxylase 2;Biotin carboxylase	Acacb	299	0	0	268	0	137	346	203	0		2	2	2.7
	sp|Q8JZN5|ACAD9_MOUSE Acyl-CoA dehydrogenase family member 9, mitochondrial OS=Mus musculus OX=10090 GN=Acad9 PE=1 SV=2	Q8JZN5	Acyl-CoA dehydrogenase family member 9, mitochondrial	Acad9	29275	14528	8975	10968	17261	12403	15793	21394	6729		12	12	28.2
	sp|P51174|ACADL_MOUSE Long-chain specific acyl-CoA dehydrogenase, mitochondrial OS=Mus musculus OX=10090 GN=Acadl PE=1 SV=2	P51174	Long-chain specific acyl-CoA dehydrogenase, mitochondrial	Acadl	177437	157077	198066	169681	115919	178122	227848	224793	187168		16	16	37.9
	sp|P45952|ACADM_MOUSE Medium-chain specific acyl-CoA dehydrogenase, mitochondrial OS=Mus musculus OX=10090 GN=Acadm PE=1 SV=1	P45952	Medium-chain specific acyl-CoA dehydrogenase, mitochondrial	Acadm	0	4089	0	6397	0	3846	4350	3814	3217		5	5	11.4
	sp|Q07417|ACADS_MOUSE Short-chain specific acyl-CoA dehydrogenase, mitochondrial OS=Mus musculus OX=10090 GN=Acads PE=1 SV=2	Q07417	Short-chain specific acyl-CoA dehydrogenase, mitochondrial	Acads	9435	4379	47615	31418	12561	8662	3894	19826	7011		12	12	46.6
	sp|Q9DBL1|ACDSB_MOUSE Short/branched chain specific acyl-CoA dehydrogenase, mitochondrial OS=Mus musculus OX=10090 GN=Acadsb PE=1 SV=1	Q9DBL1	Short/branched chain specific acyl-CoA dehydrogenase, mitochondrial	Acadsb	0	4769	2228	2517	4169	2929	3549	5896	1506		5	5	13.7
	sp|P50544|ACADV_MOUSE Very long-chain specific acyl-CoA dehydrogenase, mitochondrial OS=Mus musculus OX=10090 GN=Acadvl PE=1 SV=3	P50544	Very long-chain specific acyl-CoA dehydrogenase, mitochondrial	Acadvl	64281	43449	90170	59372	39597	40086	53925	34402	47551		22	22	44.1
	sp|Q8K2H4|ACAP1_MOUSE Arf-GAP with coiled-coil, ANK repeat and PH domain-containing protein 1 OS=Mus musculus OX=10090 GN=Acap1 PE=1 SV=1	Q8K2H4	Arf-GAP with coiled-coil, ANK repeat and PH domain-containing protein 1	Acap1	25963	34030	39972	36187	16275	30230	41507	25326	40940		21	21	39.1
	sp|Q6ZQK5-2|ACAP2_MOUSE Isoform 2 of Arf-GAP with coiled-coil, ANK repeat and PH domain-containing protein 2 OS=Mus musculus OX=10090 GN=Acap2;sp|Q6ZQK5|ACAP2_MOUSE Arf-GAP with coiled-coil, ANK repeat and PH domain-containing protein 2 OS=Mus musculus OX=	Q6ZQK5-2;Q6ZQK5	Arf-GAP with coiled-coil, ANK repeat and PH domain-containing protein 2	Acap2	0	0	1215	2057	2089	1485	2847	3471	2479		4	4	6.9
	sp|Q8QZT1|THIL_MOUSE Acetyl-CoA acetyltransferase, mitochondrial OS=Mus musculus OX=10090 GN=Acat1 PE=1 SV=1	Q8QZT1	Acetyl-CoA acetyltransferase, mitochondrial	Acat1	166239	130980	113328	125584	61199	160511	89084	96025	138646		12	12	39.9
	sp|Q8CAY6|THIC_MOUSE Acetyl-CoA acetyltransferase, cytosolic OS=Mus musculus OX=10090 GN=Acat2 PE=1 SV=2	Q8CAY6	Acetyl-CoA acetyltransferase, cytosolic	Acat2	65418	76129	97862	98079	68568	83418	79425	70221	74734		12	12	45.1
	sp|Q8BMP6|GCP60_MOUSE Golgi resident protein GCP60 OS=Mus musculus OX=10090 GN=Acbd3 PE=1 SV=3	Q8BMP6	Golgi resident protein GCP60	Acbd3	6545	6986	8046	5462	3678	4091	6488	5721	9803		10	10	32.2
	sp|Q9JIX8-4|ACINU_MOUSE Isoform 4 of Apoptotic chromatin condensation inducer in the nucleus OS=Mus musculus OX=10090 GN=Acin1;sp|Q9JIX8|ACINU_MOUSE Apoptotic chromatin condensation inducer in the nucleus OS=Mus musculus OX=10090 GN=Acin1 PE=1 SV=3;sp|Q9JI	Q9JIX8-4;Q9JIX8;Q9JIX8-3;Q9JIX8-2	Apoptotic chromatin condensation inducer in the nucleus	Acin1	45690	37367	66000	38127	35561	39354	67860	54697	40805		33	33	35.3
	sp|Q91V92|ACLY_MOUSE ATP-citrate synthase OS=Mus musculus OX=10090 GN=Acly PE=1 SV=1	Q91V92	ATP-citrate synthase	Acly	170235	172769	160862	113351	112475	92182	154655	128035	114573		44	44	50.6
	sp|P28271|ACOC_MOUSE Cytoplasmic aconitate hydratase OS=Mus musculus OX=10090 GN=Aco1 PE=1 SV=3	P28271	Cytoplasmic aconitate hydratase	Aco1	2804	2464	5682	5446	3543	5245	7033	6543	2391		14	14	24.7
	sp|Q99KI0|ACON_MOUSE Aconitate hydratase, mitochondrial OS=Mus musculus OX=10090 GN=Aco2 PE=1 SV=1	Q99KI0	Aconitate hydratase, mitochondrial	Aco2	452274	406514	446588	470255	361760	352325	399330	399046	351629		47	47	71.7
	sp|Q8VHQ9|ACO11_MOUSE Acyl-coenzyme A thioesterase 11 OS=Mus musculus OX=10090 GN=Acot11 PE=1 SV=1	Q8VHQ9	Acyl-coenzyme A thioesterase 11	Acot11	2854	742	4497	3534	1554	2303	5210	3301	1534		6	6	10.4
	sp|Q91V12-2|BACH_MOUSE Isoform A of Cytosolic acyl coenzyme A thioester hydrolase OS=Mus musculus OX=10090 GN=Acot7;sp|Q91V12-4|BACH_MOUSE Isoform D of Cytosolic acyl coenzyme A thioester hydrolase OS=Mus musculus OX=10090 GN=Acot7;sp|Q91V12|BACH_MOUSE Cyt	Q91V12-2;Q91V12-4;Q91V12;Q91V12-3	Cytosolic acyl coenzyme A thioester hydrolase	Acot7	284999	251513	312405	214122	248510	216107	319682	260129	234021		15	15	51.5
	sp|P58137|ACOT8_MOUSE Acyl-coenzyme A thioesterase 8 OS=Mus musculus OX=10090 GN=Acot8 PE=1 SV=1	P58137	Acyl-coenzyme A thioesterase 8	Acot8	3079	0	0	5054	9566	5557	3185	2757	0		4	4	20
	sp|Q9R0X4|ACOT9_MOUSE Acyl-coenzyme A thioesterase 9, mitochondrial OS=Mus musculus OX=10090 GN=Acot9 PE=1 SV=1;sp|Q32MW3|ACO10_MOUSE Acyl-coenzyme A thioesterase 10, mitochondrial OS=Mus musculus OX=10090 GN=Acot10 PE=2 SV=1	Q9R0X4;Q32MW3	Acyl-coenzyme A thioesterase 9, mitochondrial;Acyl-coenzyme A thioesterase 10, mitochondrial	Acot9;Acot10	6462	5734	12279	8221	7458	8407	6764	4007	3293		9	9	22.8
	sp|Q9D358|PPAC_MOUSE Low molecular weight phosphotyrosine protein phosphatase OS=Mus musculus OX=10090 GN=Acp1 PE=1 SV=3	Q9D358	Low molecular weight phosphotyrosine protein phosphatase	Acp1	80537	64870	58391	29247	93487	102340	114802	34766	91907		9	2	65.8
	sp|Q9D358-2|PPAC_MOUSE Isoform 2 of Low molecular weight phosphotyrosine protein phosphatase OS=Mus musculus OX=10090 GN=Acp1	Q9D358-2	Low molecular weight phosphotyrosine protein phosphatase	Acp1	4822	8625	0	0	0	0	7142	6508	6742		1	1	65.8
	sp|Q8VCW8|ACSF2_MOUSE Medium-chain acyl-CoA ligase ACSF2, mitochondrial OS=Mus musculus OX=10090 GN=Acsf2 PE=1 SV=1	Q8VCW8	Acyl-CoA synthetase family member 2, mitochondrial	Acsf2	2725	0	3354	3733	4853	4733	2765	1905	3550		6	6	15
	sp|Q3URE1|ACSF3_MOUSE Malonate--CoA ligase ACSF3, mitochondrial OS=Mus musculus OX=10090 GN=Acsf3 PE=1 SV=2;sp|Q3URE1-2|ACSF3_MOUSE Isoform 2 of Malonate--CoA ligase ACSF3, mitochondrial OS=Mus musculus OX=10090 GN=Acsf3	Q3URE1;Q3URE1-2	Acyl-CoA synthetase family member 3, mitochondrial	Acsf3	1667	0	0	1260	0	1959	3150	1789	861		5	5	13.9
	sp|Q9CZW4|ACSL3_MOUSE Long-chain-fatty-acid--CoA ligase 3 OS=Mus musculus OX=10090 GN=Acsl3 PE=1 SV=2	Q9CZW4	Long-chain-fatty-acid--CoA ligase 3	Acsl3	531	1254	792	609	1782	623	0	592	2044		4	4	9.2
	sp|Q9QUJ7-2|ACSL4_MOUSE Isoform Short of Long-chain-fatty-acid--CoA ligase 4 OS=Mus musculus OX=10090 GN=Acsl4;sp|Q9QUJ7|ACSL4_MOUSE Long-chain-fatty-acid--CoA ligase 4 OS=Mus musculus OX=10090 GN=Acsl4 PE=1 SV=2	Q9QUJ7-2;Q9QUJ7	Long-chain-fatty-acid--CoA ligase 4	Acsl4	49038	65720	83474	51605	67349	56366	79890	64567	80871		25	24	49.1
	sp|Q8JZR0|ACSL5_MOUSE Long-chain-fatty-acid--CoA ligase 5 OS=Mus musculus OX=10090 GN=Acsl5 PE=1 SV=1	Q8JZR0;P41216	Long-chain-fatty-acid--CoA ligase 5	Acsl5	31173	10808	21331	38182	17582	39317	21320	26737	27401		20	20	35.1
	sp|P60710|ACTB_MOUSE Actin, cytoplasmic 1 OS=Mus musculus OX=10090 GN=Actb PE=1 SV=1	P60710	Actin, cytoplasmic 1;Actin, cytoplasmic 1, N-terminally processed	Actb	56613100	53157300	64776200	48168500	48858800	51227600	50927600	48784200	52638100		48	2	85.1
	sp|P68033|ACTC_MOUSE Actin, alpha cardiac muscle 1 OS=Mus musculus OX=10090 GN=Actc1 PE=1 SV=1;sp|P68134|ACTS_MOUSE Actin, alpha skeletal muscle OS=Mus musculus OX=10090 GN=Acta1 PE=1 SV=1;sp|P63268|ACTH_MOUSE Actin, gamma-enteric smooth muscle OS=Mus musc	P68033;P68134;P63268;P62737	Actin, alpha cardiac muscle 1;Actin, alpha skeletal muscle;Actin, gamma-enteric smooth muscle;Actin, aortic smooth muscle	Actc1;Acta1;Actg2;Acta2	35268	40225	83416	25045	0	11062	63852	7443	57585		5	5	46.7
	sp|Q9Z2N8|ACL6A_MOUSE Actin-like protein 6A OS=Mus musculus OX=10090 GN=Actl6a PE=1 SV=2	Q9Z2N8;Q99MR0	Actin-like protein 6A	Actl6a	80668	73478	83081	74889	64696	53585	86222	91218	69512		8	8	30.1
	sp|P57780|ACTN4_MOUSE Alpha-actinin-4 OS=Mus musculus OX=10090 GN=Actn4 PE=1 SV=1	P57780;Q9JI91;O88990	Alpha-actinin-4	Actn4	370024	371547	462411	346290	276442	282078	358036	296243	321354		58	37	71.7
	sp|P61164|ACTZ_MOUSE Alpha-centractin OS=Mus musculus OX=10090 GN=Actr1a PE=1 SV=1	P61164	Alpha-centractin	Actr1a	103397	98251	127266	86042	51062	66900	78764	61415	101019		19	8	66
	sp|Q8R5C5|ACTY_MOUSE Beta-centractin OS=Mus musculus OX=10090 GN=Actr1b PE=1 SV=1	Q8R5C5	Beta-centractin	Actr1b	13333	16973	10645	9209	7723	8834	15916	2780	9818		3	3	52.4
	sp|P61161|ARP2_MOUSE Actin-related protein 2 OS=Mus musculus OX=10090 GN=Actr2 PE=1 SV=1	P61161	Actin-related protein 2	Actr2	482757	439101	482575	484809	446482	490005	619273	409375	361793		19	19	52
	sp|Q99JY9|ARP3_MOUSE Actin-related protein 3 OS=Mus musculus OX=10090 GN=Actr3 PE=1 SV=3	Q99JY9	Actin-related protein 3	Actr3	753293	604224	769579	605735	464906	476156	651332	470994	515710		26	22	65.8
	sp|Q99JW2|ACY1_MOUSE Aminoacylase-1 OS=Mus musculus OX=10090 GN=Acy1 PE=1 SV=1	Q99JW2	Aminoacylase-1	Acy1	5552	0	0	3058	1864	0	5353	561	882		6	6	16.9
	sp|P56376|ACYP1_MOUSE Acylphosphatase-1 OS=Mus musculus OX=10090 GN=Acyp1 PE=1 SV=2	P56376	Acylphosphatase-1	Acyp1	14324	0	7570	7633	0	11810	10832	11393	0		2	2	27.3
	sp|P03958|ADA_MOUSE Adenosine deaminase OS=Mus musculus OX=10090 GN=Ada PE=1 SV=3	P03958	Adenosine deaminase	Ada	112335	92859	128679	104934	77696	77142	89626	78092	91771		17	17	55.1
	sp|O35598|ADA10_MOUSE Disintegrin and metalloproteinase domain-containing protein 10 OS=Mus musculus OX=10090 GN=Adam10 PE=1 SV=2	O35598	Disintegrin and metalloproteinase domain-containing protein 10	Adam10	5746	3514	5129	4990	5725	2713	6443	1406	4782		8	8	16.4
	sp|Q05910|ADAM8_MOUSE Disintegrin and metalloproteinase domain-containing protein 8 OS=Mus musculus OX=10090 GN=Adam8 PE=1 SV=3	Q05910	Disintegrin and metalloproteinase domain-containing protein 8	Adam8	2761	1660	2689	1414	1690	1195	1017	0	1064		4	4	7.9
	tr|E9PY16|E9PY16_MOUSE ArfGAP with dual PH domains 1 OS=Mus musculus OX=10090 GN=Adap1 PE=1 SV=1	E9PY16;Q8R2V5		Adap1	5825	4594	0	5413	3519	1868	7259	3980	3178		6	6	22.7
	sp|Q99MU3-2|DSRAD_MOUSE Isoform 2 of Double-stranded RNA-specific adenosine deaminase OS=Mus musculus OX=10090 GN=Adar;sp|Q99MU3-3|DSRAD_MOUSE Isoform 3 of Double-stranded RNA-specific adenosine deaminase OS=Mus musculus OX=10090 GN=Adar;sp|Q99MU3-5|DSRAD_	Q99MU3-2;Q99MU3-3;Q99MU3-5;Q99MU3;Q99MU3-4	Double-stranded RNA-specific adenosine deaminase	Adar	872	865	1259	6305	0	0	1333	5205	0		5	5	6.9
	sp|Q9QYC0-2|ADDA_MOUSE Isoform 2 of Alpha-adducin OS=Mus musculus OX=10090 GN=Add1;sp|Q9QYC0|ADDA_MOUSE Alpha-adducin OS=Mus musculus OX=10090 GN=Add1 PE=1 SV=2	Q9QYC0-2;Q9QYC0	Alpha-adducin	Add1	12988	9001	9747	11416	12401	11387	12215	5790	9113		12	12	33.5
	sp|Q9QYB5-2|ADDG_MOUSE Isoform 1 of Gamma-adducin OS=Mus musculus OX=10090 GN=Add3;sp|Q9QYB5|ADDG_MOUSE Gamma-adducin OS=Mus musculus OX=10090 GN=Add3 PE=1 SV=2	Q9QYB5-2;Q9QYB5	Gamma-adducin	Add3	3324	3987	7179	7571	3167	9196	7464	4797	1201		10	10	26.3
	sp|P28474|ADHX_MOUSE Alcohol dehydrogenase class-3 OS=Mus musculus OX=10090 GN=Adh5 PE=1 SV=3	P28474;Q64437	Alcohol dehydrogenase class-3	Adh5	209234	188557	231637	174044	162666	193081	224978	162294	172317		14	14	56.7
	sp|P55264-2|ADK_MOUSE Isoform Short of Adenosine kinase OS=Mus musculus OX=10090 GN=Adk;sp|P55264|ADK_MOUSE Adenosine kinase OS=Mus musculus OX=10090 GN=Adk PE=1 SV=2	P55264-2;P55264	Adenosine kinase	Adk	14950	20753	19364	15352	26970	21712	15169	18157	9692		9	9	35.7
	sp|Q9Z103|ADNP_MOUSE Activity-dependent neuroprotector homeobox protein OS=Mus musculus OX=10090 GN=Adnp PE=1 SV=2	Q9Z103	Activity-dependent neuroprotector homeobox protein	Adnp	2580	1844	1891	3429	1743	0	3644	1895	1503		12	12	14.4
	sp|Q6PDY2|AEDO_MOUSE 2-aminoethanethiol dioxygenase OS=Mus musculus OX=10090 GN=Ado PE=1 SV=2	Q6PDY2	2-aminoethanethiol dioxygenase	Ado	0	0	0	0	3734	5697	13150	16478	3273		4	4	18.8
	sp|Q8VDL4|ADPGK_MOUSE ADP-dependent glucokinase OS=Mus musculus OX=10090 GN=Adpgk PE=1 SV=2;sp|Q8VDL4-3|ADPGK_MOUSE Isoform 3 of ADP-dependent glucokinase OS=Mus musculus OX=10090 GN=Adpgk	Q8VDL4;Q8VDL4-3;Q8VDL4-2	ADP-dependent glucokinase	Adpgk	10629	0	8699	11463	6299	9969	10440	10106	8701		7	7	19.2
	sp|P54923|ADPRH_MOUSE [Protein ADP-ribosylarginine] hydrolase OS=Mus musculus OX=10090 GN=Adprh PE=1 SV=1	P54923	[Protein ADP-ribosylarginine] hydrolase	Adprh	36601	37517	42929	17559	12968	12899	23049	19075	21262		9	9	30.4
	sp|Q8CG72|ARHL2_MOUSE ADP-ribose glycohydrolase ARH3 OS=Mus musculus OX=10090 GN=Adprhl2 PE=1 SV=1;sp|Q8CG72-2|ARHL2_MOUSE Isoform 2 of ADP-ribose glycohydrolase ARH3 OS=Mus musculus OX=10090 GN=Adprhl2	Q8CG72;Q8CG72-2	Poly(ADP-ribose) glycohydrolase ARH3	Adprhl2	4097	2265	49662	3003	31097	28761	3686	4793	36110		5	5	23
	sp|Q99MK8|ARBK1_MOUSE Beta-adrenergic receptor kinase 1 OS=Mus musculus OX=10090 GN=Grk2 PE=1 SV=2	Q99MK8;Q8BVT9;Q3UYH7	Beta-adrenergic receptor kinase 1	Adrbk1	67326	47694	73494	57135	31562	25285	50693	62273	41289		24	24	45.7
	sp|Q9JKV1|ADRM1_MOUSE Proteasomal ubiquitin receptor ADRM1 OS=Mus musculus OX=10090 GN=Adrm1 PE=1 SV=2	Q9JKV1	Proteasomal ubiquitin receptor ADRM1	Adrm1	30357	25496	32801	27685	25511	14726	24449	15826	27650		6	6	17.2
	sp|P54822|PUR8_MOUSE Adenylosuccinate lyase OS=Mus musculus OX=10090 GN=Adsl PE=1 SV=2	P54822	Adenylosuccinate lyase	Adsl	178960	160680	201895	136237	74597	139149	155018	143060	153276		22	22	55.2
	sp|P46664|PURA2_MOUSE Adenylosuccinate synthetase isozyme 2 OS=Mus musculus OX=10090 GN=Adss PE=1 SV=2	P46664	Adenylosuccinate synthetase isozyme 2	Adss	97872	81317	97273	77929	68466	77855	92194	70515	80858		16	15	46.7
	sp|Q9Z248-4|AEBP2_MOUSE Isoform 4 of Zinc finger protein AEBP2 OS=Mus musculus OX=10090 GN=Aebp2;sp|Q9Z248-3|AEBP2_MOUSE Isoform 3 of Zinc finger protein AEBP2 OS=Mus musculus OX=10090 GN=Aebp2;sp|Q9Z248-5|AEBP2_MOUSE Isoform 5 of Zinc finger protein AEBP2	Q9Z248-4;Q9Z248-3;Q9Z248-5;Q9Z248-2;Q9Z248	Zinc finger protein AEBP2	Aebp2	6251	0	4351	0	4726	0	4705	5157	3020		4	4	22.3
	sp|Q9CZI9-2|AEN_MOUSE Isoform 2 of Apoptosis-enhancing nuclease OS=Mus musculus OX=10090 GN=Aen;sp|Q9CZI9|AEN_MOUSE Apoptosis-enhancing nuclease OS=Mus musculus OX=10090 GN=Aen PE=2 SV=1	Q9CZI9-2;Q9CZI9	Apoptosis-enhancing nuclease	Aen	0	0	8132	2147	3830	1778	2782	1977	1445		3	3	13.8
	sp|Q920A7|AFG31_MOUSE AFG3-like protein 1 OS=Mus musculus OX=10090 GN=Afg3l1 PE=1 SV=2;sp|Q920A7-2|AFG31_MOUSE Isoform 2 of AFG3-like protein 1 OS=Mus musculus OX=10090 GN=Afg3l1	Q920A7;Q920A7-2	AFG3-like protein 1	Afg3l1	5221	840	1057	3790	0	12261	5401	0	1441		9	9	19.6
	sp|Q8JZQ2|AFG32_MOUSE AFG3-like protein 2 OS=Mus musculus OX=10090 GN=Afg3l2 PE=1 SV=1	Q8JZQ2	AFG3-like protein 2	Afg3l2	6098	5009	9656	5659	2884	5809	10605	8838	2840		11	9	15.7
	sp|Q3UHD9-2|AGAP2_MOUSE Isoform 2 of Arf-GAP with GTPase, ANK repeat and PH domain-containing protein 2 OS=Mus musculus OX=10090 GN=Agap2;sp|Q3UHD9|AGAP2_MOUSE Arf-GAP with GTPase, ANK repeat and PH domain-containing protein 2 OS=Mus musculus OX=10090 GN=A	Q3UHD9-2;Q3UHD9	Arf-GAP with GTPase, ANK repeat and PH domain-containing protein 2	Agap2	3905	1468	4006	3015	1548	3656	4308	2746	2234		8	8	9.5
	sp|Q8K2K6-3|AGFG1_MOUSE Isoform 3 of Arf-GAP domain and FG repeat-containing protein 1 OS=Mus musculus OX=10090 GN=Agfg1;sp|Q8K2K6-1|AGFG1_MOUSE Isoform 1 of Arf-GAP domain and FG repeat-containing protein 1 OS=Mus musculus OX=10090 GN=Agfg1;sp|Q8K2K6|AGFG	Q8K2K6-3;Q8K2K6-1;Q8K2K6;Q8K2K6-2	Arf-GAP domain and FG repeat-containing protein 1	Agfg1	20302	28782	28720	25079	29527	17954	16509	5043	10655		9	9	24
	sp|Q80WC7-2|AGFG2_MOUSE Isoform 2 of Arf-GAP domain and FG repeat-containing protein 2 OS=Mus musculus OX=10090 GN=Agfg2;sp|Q80WC7|AGFG2_MOUSE Arf-GAP domain and FG repeat-containing protein 2 OS=Mus musculus OX=10090 GN=Agfg2 PE=1 SV=1	Q80WC7-2;Q80WC7	Arf-GAP domain and FG repeat-containing protein 2	Agfg2	6648	0	0	4767	0	6479	6259	4537	4126		2	2	8.7
	sp|Q9ESW4|AGK_MOUSE Acylglycerol kinase, mitochondrial OS=Mus musculus OX=10090 GN=Agk PE=1 SV=1;sp|Q9ESW4-2|AGK_MOUSE Isoform 2 of Acylglycerol kinase, mitochondrial OS=Mus musculus OX=10090 GN=Agk	Q9ESW4;Q9ESW4-2	Acylglycerol kinase, mitochondrial	Agk	6312	7283	3498	4683	14086	8876	16801	3493	15262		7	7	26.4
	sp|Q8CJG0|AGO2_MOUSE Protein argonaute-2 OS=Mus musculus OX=10090 GN=Ago2 PE=1 SV=3	Q8CJG0;Q8CJF9;Q8CJF8-2;Q8CJF8	Protein argonaute-2	Ago2	8409	3790	4876	11701	10588	2758	12385	3639	6088		18	14	32.8
	sp|Q8C0I1|ADAS_MOUSE Alkyldihydroxyacetonephosphate synthase, peroxisomal OS=Mus musculus OX=10090 GN=Agps PE=1 SV=1	Q8C0I1	Alkyldihydroxyacetonephosphate synthase, peroxisomal	Agps	95214	89286	24606	22944	10031	21179	109549	19428	15450		15	15	34
	sp|Q8CJF7|ELYS_MOUSE Protein ELYS OS=Mus musculus OX=10090 GN=Ahctf1 PE=1 SV=1	Q8CJF7	Protein ELYS	Ahctf1	1882	374	1283	1290	510	216	2013	914	811		11	11	7.4
	sp|P50247|SAHH_MOUSE Adenosylhomocysteinase OS=Mus musculus OX=10090 GN=Ahcy PE=1 SV=3	P50247	Adenosylhomocysteinase	Ahcy	607387	510476	584783	501375	483892	405593	569820	470683	446894		26	26	62
	sp|Q80SW1|SAHH2_MOUSE S-adenosylhomocysteine hydrolase-like protein 1 OS=Mus musculus OX=10090 GN=Ahcyl1 PE=1 SV=1	Q80SW1	Putative adenosylhomocysteinase 2	Ahcyl1	1074	1417	5119	1479	716	1001	5202	0	4647		3	3	18.9
	sp|Q68FL4-2|SAHH3_MOUSE Isoform 2 of Putative adenosylhomocysteinase 3 OS=Mus musculus OX=10090 GN=Ahcyl2;sp|Q68FL4|SAHH3_MOUSE Putative adenosylhomocysteinase 3 OS=Mus musculus OX=10090 GN=Ahcyl2 PE=1 SV=1	Q68FL4-2;Q68FL4	Putative adenosylhomocysteinase 3	Ahcyl2	10314	0	6395	5575	11652	14171	22248	14041	15869		7	3	20.7
	tr|E9Q616|E9Q616_MOUSE AHNAK nucleoprotein (desmoyokin) OS=Mus musculus OX=10090 GN=Ahnak PE=1 SV=1	E9Q616;A0A494BBD5;G5E8K8;A0A494B8Y7		Ahnak	47112	40975	71669	61273	63900	70708	50980	53508	56640		143	143	54.1
	sp|Q8BK64|AHSA1_MOUSE Activator of 90 kDa heat shock protein ATPase homolog 1 OS=Mus musculus OX=10090 GN=Ahsa1 PE=1 SV=2	Q8BK64	Activator of 90 kDa heat shock protein ATPase homolog 1	Ahsa1	179134	195154	202548	126902	88723	97870	145552	115915	172350		15	15	52.7
	sp|Q9Z0X1|AIFM1_MOUSE Apoptosis-inducing factor 1, mitochondrial OS=Mus musculus OX=10090 GN=Aifm1 PE=1 SV=1	Q9Z0X1	Apoptosis-inducing factor 1, mitochondrial	Aifm1	46275	36414	22448	29851	28491	40019	29514	44062	28292		12	12	31
	tr|E9PVP1|E9PVP1_MOUSE Crystallin beta-gamma domain-containing 1 OS=Mus musculus OX=10090 GN=Crybg1 PE=1 SV=1;tr|A0A0G2JG52|A0A0G2JG52_MOUSE Crystallin beta-gamma domain-containing 1 OS=Mus musculus OX=10090 GN=Crybg1 PE=1 SV=1	E9PVP1;A0A0G2JG52		Aim1	3327	2794	1175	3082	2063	3858	2527	3405	2660		10	10	10.6
	sp|P31230|AIMP1_MOUSE Aminoacyl tRNA synthase complex-interacting multifunctional protein 1 OS=Mus musculus OX=10090 GN=Aimp1 PE=1 SV=2	P31230	Aminoacyl tRNA synthase complex-interacting multifunctional protein 1;Endothelial monocyte-activating polypeptide 2	Aimp1	95559	76679	77931	46655	29504	45087	39522	66042	52642		15	15	65.8
	sp|Q8R010|AIMP2_MOUSE Aminoacyl tRNA synthase complex-interacting multifunctional protein 2 OS=Mus musculus OX=10090 GN=Aimp2 PE=1 SV=2	Q8R010	Aminoacyl tRNA synthase complex-interacting multifunctional protein 2	Aimp2	87758	84446	181480	103653	123688	102410	132627	78557	133743		10	10	51.2
	sp|O08915|AIP_MOUSE AH receptor-interacting protein OS=Mus musculus OX=10090 GN=Aip PE=1 SV=1	O08915	AH receptor-interacting protein	Aip	59746	49769	62414	41469	73398	46666	92590	38188	36902		11	11	47
	sp|Q9WTP6-2|KAD2_MOUSE Isoform 2 of Adenylate kinase 2, mitochondrial OS=Mus musculus OX=10090 GN=Ak2;sp|Q9WTP6|KAD2_MOUSE Adenylate kinase 2, mitochondrial OS=Mus musculus OX=10090 GN=Ak2 PE=1 SV=5	Q9WTP6-2;Q9WTP6	Adenylate kinase 2, mitochondrial;Adenylate kinase 2, mitochondrial, N-terminally processed	Ak2	79917	82849	107655	98052	84589	219748	122583	189187	121302		13	13	69
	sp|Q9WTP7|KAD3_MOUSE GTP:AMP phosphotransferase AK3, mitochondrial OS=Mus musculus OX=10090 GN=Ak3 PE=1 SV=3	Q9WTP7	GTP:AMP phosphotransferase AK3, mitochondrial	Ak3	16017	17234	7482	10801	17000	21591	8341	15885	17396		4	4	26.4
	sp|E9Q394-2|AKP13_MOUSE Isoform 2 of A-kinase anchor protein 13 OS=Mus musculus OX=10090 GN=Akap13;sp|E9Q394|AKP13_MOUSE A-kinase anchor protein 13 OS=Mus musculus OX=10090 GN=Akap13 PE=1 SV=1	E9Q394-2;E9Q394		Akap13	743	1430	2525	1327	549	0	1373	1079	781		15	15	7
	sp|Q9DBR0|AKAP8_MOUSE A-kinase anchor protein 8 OS=Mus musculus OX=10090 GN=Akap8 PE=1 SV=1	Q9DBR0	A-kinase anchor protein 8	Akap8	12627	8992	17168	13679	9571	4532	6684	12664	9309		10	10	20.8
	sp|Q70FJ1-3|AKAP9_MOUSE Isoform 3 of A-kinase anchor protein 9 OS=Mus musculus OX=10090 GN=Akap9;sp|Q70FJ1-2|AKAP9_MOUSE Isoform 2 of A-kinase anchor protein 9 OS=Mus musculus OX=10090 GN=Akap9;sp|Q70FJ1|AKAP9_MOUSE A-kinase anchor protein 9 OS=Mus musculu	Q70FJ1-3;Q70FJ1-2;Q70FJ1	A-kinase anchor protein 9	Akap9	1751	0	0	1170	237	281	1255	214	0		5	5	1.5
	sp|Q9JII6|AK1A1_MOUSE Aldo-keto reductase family 1 member A1 OS=Mus musculus OX=10090 GN=Akr1a1 PE=1 SV=3	Q9JII6	Alcohol dehydrogenase [NADP(+)]	Akr1a1	54991	68941	121092	93800	77783	70933	104125	60518	63570		12	12	51.7
	sp|P45376|ALDR_MOUSE Aldo-keto reductase family 1 member B1 OS=Mus musculus OX=10090 GN=Akr1b1 PE=1 SV=3	P45376	Aldose reductase	Akr1b1	394004	510690	498971	480620	523375	369665	541638	346311	390307		21	21	65.2
	sp|Q8VC28|AK1CD_MOUSE Aldo-keto reductase family 1 member C13 OS=Mus musculus OX=10090 GN=Akr1c13 PE=1 SV=2	Q8VC28	Aldo-keto reductase family 1 member C13	Akr1c13	45560	26155	35392	24557	22731	12636	21979	9939	9245		12	12	56
	sp|Q9DCT1|AKCL2_MOUSE 1,5-anhydro-D-fructose reductase OS=Mus musculus OX=10090 GN=Akr1e2 PE=1 SV=1	Q9DCT1	1,5-anhydro-D-fructose reductase	Akr1e2	10400	517509	0	439338	268367	1933	3185	0	0		4	4	14.6
	sp|Q8CG76|ARK72_MOUSE Aflatoxin B1 aldehyde reductase member 2 OS=Mus musculus OX=10090 GN=Akr7a2 PE=1 SV=3	Q8CG76	Aflatoxin B1 aldehyde reductase member 2	Akr7a2	7770	3325	4531	10955	4815	1958	10535	6642	7102		5	5	21.3
	sp|P31750|AKT1_MOUSE RAC-alpha serine/threonine-protein kinase OS=Mus musculus OX=10090 GN=Akt1 PE=1 SV=2	P31750	RAC-alpha serine/threonine-protein kinase	Akt1	10866	16298	11617	11526	8530	8413	11580	13095	5603		10	9	27.5
	sp|Q60823|AKT2_MOUSE RAC-beta serine/threonine-protein kinase OS=Mus musculus OX=10090 GN=Akt2 PE=1 SV=1	Q60823;Q9WUA6-2;Q9WUA6	RAC-beta serine/threonine-protein kinase	Akt2	7193	8859	8836	12394	7388	7830	13743	8462	3251		7	7	20.8
	sp|P10518|HEM2_MOUSE Delta-aminolevulinic acid dehydratase OS=Mus musculus OX=10090 GN=Alad PE=1 SV=1	P10518	Delta-aminolevulinic acid dehydratase	Alad	29553	29673	31286	29056	18920	20981	32810	27894	21005		8	8	30.3
	sp|Q571I9|A16A1_MOUSE Aldehyde dehydrogenase family 16 member A1 OS=Mus musculus OX=10090 GN=Aldh16a1 PE=1 SV=2	Q571I9	Aldehyde dehydrogenase family 16 member A1	Aldh16a1	5077	7391	6594	11689	5747	10425	6298	2022	2520		5	5	9.2
	sp|Q9Z110-2|P5CS_MOUSE Isoform Short of Delta-1-pyrroline-5-carboxylate synthase OS=Mus musculus OX=10090 GN=Aldh18a1;sp|Q9Z110|P5CS_MOUSE Delta-1-pyrroline-5-carboxylate synthase OS=Mus musculus OX=10090 GN=Aldh18a1 PE=1 SV=2	Q9Z110-2;Q9Z110	Delta-1-pyrroline-5-carboxylate synthase;Glutamate 5-kinase;Gamma-glutamyl phosphate reductase	Aldh18a1	92631	86736	144947	110963	68998	107479	120441	85306	60858		35	35	49.8
	sp|P47738|ALDH2_MOUSE Aldehyde dehydrogenase, mitochondrial OS=Mus musculus OX=10090 GN=Aldh2 PE=1 SV=1	P47738	Aldehyde dehydrogenase, mitochondrial	Aldh2	5474	2353	3151	11324	3712	6542	10263	8545	5560		10	10	29.5
	sp|Q9DBF1-2|AL7A1_MOUSE Isoform 2 of Alpha-aminoadipic semialdehyde dehydrogenase OS=Mus musculus OX=10090 GN=Aldh7a1;sp|Q9DBF1|AL7A1_MOUSE Alpha-aminoadipic semialdehyde dehydrogenase OS=Mus musculus OX=10090 GN=Aldh7a1 PE=1 SV=4	Q9DBF1-2;Q9DBF1	Alpha-aminoadipic semialdehyde dehydrogenase	Aldh7a1	6651	5160	8266	8939	5020	6870	8262	4062	2415		6	6	21.7
	sp|Q9JLJ2|AL9A1_MOUSE 4-trimethylaminobutyraldehyde dehydrogenase OS=Mus musculus OX=10090 GN=Aldh9a1 PE=1 SV=1	Q9JLJ2	4-trimethylaminobutyraldehyde dehydrogenase	Aldh9a1	204212	151704	186863	165486	143086	179927	151441	113755	140089		22	22	59.1
	sp|P05064|ALDOA_MOUSE Fructose-bisphosphate aldolase A OS=Mus musculus OX=10090 GN=Aldoa PE=1 SV=2	P05064	Fructose-bisphosphate aldolase A	Aldoa	4993700	4363780	5361250	3586210	3822430	3940130	4155350	3581170	3821280		34	28	87.6
	sp|P05063|ALDOC_MOUSE Fructose-bisphosphate aldolase C OS=Mus musculus OX=10090 GN=Aldoc PE=1 SV=4	P05063	Fructose-bisphosphate aldolase C	Aldoc	17199	29083	35048	14316	20925	30481	16144	7100	15359		13	13	63.6
	sp|Q9DBE8|ALG2_MOUSE Alpha-1,3/1,6-mannosyltransferase ALG2 OS=Mus musculus OX=10090 GN=Alg2 PE=1 SV=2	Q9DBE8	Alpha-1,3/1,6-mannosyltransferase ALG2	Alg2	1248	2543	2271	2848	0	1185	4434	2564	2190		3	3	13.5
	sp|Q9DB25|ALG5_MOUSE Dolichyl-phosphate beta-glucosyltransferase OS=Mus musculus OX=10090 GN=Alg5 PE=1 SV=1	Q9DB25	Dolichyl-phosphate beta-glucosyltransferase	Alg5	0	0	0	6734	10061	3686	10041	4735	5842		4	4	17.9
	sp|Q6P8H8|ALG8_MOUSE Probable dolichyl pyrophosphate Glc1Man9GlcNAc2 alpha-1,3-glucosyltransferase OS=Mus musculus OX=10090 GN=Alg8 PE=2 SV=2	Q6P8H8	Probable dolichyl pyrophosphate Glc1Man9GlcNAc2 alpha-1,3-glucosyltransferase	Alg8	4285	4273	3626	0	4229	3074	4200	2654	0		1	1	1.7
	sp|Q3TSG4|ALKB5_MOUSE RNA demethylase ALKBH5 OS=Mus musculus OX=10090 GN=Alkbh5 PE=1 SV=2	Q3TSG4	RNA demethylase ALKBH5	Alkbh5	7567	10896	15919	8211	5295	7618	4955	2752	8708		6	6	19.7
	sp|O08583|THOC4_MOUSE THO complex subunit 4 OS=Mus musculus OX=10090 GN=Alyref PE=1 SV=3;sp|O08583-2|THOC4_MOUSE Isoform 2 of THO complex subunit 4 OS=Mus musculus OX=10090 GN=Alyref;sp|Q9JJW6-2|ALRF2_MOUSE Isoform 2 of Aly/REF export factor 2 OS=Mus muscu	O08583;O08583-2;Q9JJW6-2;Q9JJW6	THO complex subunit 4;Aly/REF export factor 2	Alyref;Alyref2	472457	416861	504155	334966	293690	347774	452094	378798	375212		6	6	33.7
	sp|Q8JZZ6|AMERL_MOUSE AMMECR1-like protein OS=Mus musculus OX=10090 GN=Ammecr1l PE=1 SV=1;sp|Q9JHT5|AMMR1_MOUSE AMME syndrome candidate gene 1 protein homolog OS=Mus musculus OX=10090 GN=Ammecr1 PE=2 SV=1	Q8JZZ6;Q9JHT5	AMMECR1-like protein;AMME syndrome candidate gene 1 protein homolog	Ammecr1l;Ammecr1	3996	4726	6518	2862	3530	3977	3351	0	0		2	2	7.4
	sp|Q9DBT5|AMPD2_MOUSE AMP deaminase 2 OS=Mus musculus OX=10090 GN=Ampd2 PE=1 SV=1	Q9DBT5	AMP deaminase 2	Ampd2	8092	1897	5066	23536	10287	5941	11494	11868	11573		12	12	16.4
	sp|P53995|APC1_MOUSE Anaphase-promoting complex subunit 1 OS=Mus musculus OX=10090 GN=Anapc1 PE=1 SV=2	P53995	Anaphase-promoting complex subunit 1	Anapc1	6159	4293	7049	6317	4878	4318	7329	4421	9460		22	22	18.4
	sp|Q8BZQ7|ANC2_MOUSE Anaphase-promoting complex subunit 2 OS=Mus musculus OX=10090 GN=Anapc2 PE=1 SV=2	Q8BZQ7	Anaphase-promoting complex subunit 2	Anapc2	3668	2304	5492	4026	4584	4583	3675	4812	2858		5	5	8.5
	sp|Q91W96|APC4_MOUSE Anaphase-promoting complex subunit 4 OS=Mus musculus OX=10090 GN=Anapc4 PE=1 SV=1	Q91W96	Anaphase-promoting complex subunit 4	Anapc4	7000	3435	5436	5097	2857	5212	7263	5847	6537		10	10	16.9
	sp|Q8BTZ4|APC5_MOUSE Anaphase-promoting complex subunit 5 OS=Mus musculus OX=10090 GN=Anapc5 PE=1 SV=1;sp|Q8BTZ4-2|APC5_MOUSE Isoform 2 of Anaphase-promoting complex subunit 5 OS=Mus musculus OX=10090 GN=Anapc5	Q8BTZ4;Q8BTZ4-2	Anaphase-promoting complex subunit 5	Anapc5	4900	6504	7926	8789	4283	6876	7774	4359	5827		10	10	20.5
	sp|Q9WVM3|APC7_MOUSE Anaphase-promoting complex subunit 7 OS=Mus musculus OX=10090 GN=Anapc7 PE=1 SV=3	Q9WVM3	Anaphase-promoting complex subunit 7	Anapc7	1625	2262	2074	1535	2005	0	0	0	0		3	3	8.7
	sp|Q8K1C0-5|ANGE2_MOUSE Isoform 5 of Protein angel homolog 2 OS=Mus musculus OX=10090 GN=Angel2;sp|Q8K1C0-4|ANGE2_MOUSE Isoform 4 of Protein angel homolog 2 OS=Mus musculus OX=10090 GN=Angel2;sp|Q8K1C0-3|ANGE2_MOUSE Isoform 3 of Protein angel homolog 2 OS=	Q8K1C0-5;Q8K1C0-4;Q8K1C0-3;Q8K1C0-2;Q8K1C0	Protein angel homolog 2	Angel2	0	4892	4879	2159	3496	0	0	0	0		2	2	13.2
	sp|Q810B6|ANFY1_MOUSE Rabankyrin-5 OS=Mus musculus OX=10090 GN=Ankfy1 PE=1 SV=2	Q810B6;Q810B6-2	Rabankyrin-5	Ankfy1	2498	7067	9063	2086	4624	8151	4217	4645	11487		19	19	26.9
	sp|Q3TPE9-2|ANKY2_MOUSE Isoform 2 of Ankyrin repeat and MYND domain-containing protein 2 OS=Mus musculus OX=10090 GN=Ankmy2;sp|Q3TPE9|ANKY2_MOUSE Ankyrin repeat and MYND domain-containing protein 2 OS=Mus musculus OX=10090 GN=Ankmy2 PE=1 SV=1	Q3TPE9-2;Q3TPE9	Ankyrin repeat and MYND domain-containing protein 2	Ankmy2	0	0	1700	1306	0	884	1000	0	1049		2	2	11
	sp|Q80UP5|AN13A_MOUSE Ankyrin repeat domain-containing protein 13A OS=Mus musculus OX=10090 GN=Ankrd13a PE=1 SV=2	Q80UP5;Q6PD24	Ankyrin repeat domain-containing protein 13A	Ankrd13a	2145	0	4414	2898	1523	1992	3884	2829	2481		4	4	7.5
	sp|Q99NH0|ANR17_MOUSE Ankyrin repeat domain-containing protein 17 OS=Mus musculus OX=10090 GN=Ankrd17 PE=1 SV=2;sp|Q99NH0-3|ANR17_MOUSE Isoform 3 of Ankyrin repeat domain-containing protein 17 OS=Mus musculus OX=10090 GN=Ankrd17;sp|Q99NH0-2|ANR17_MOUSE Iso	Q99NH0;Q99NH0-3;Q99NH0-2	Ankyrin repeat domain-containing protein 17	Ankrd17	622	690	3133	829	417	1933	994	2053	1309		15	8	9.9
	sp|B2RXR6|ANR44_MOUSE Serine/threonine-protein phosphatase 6 regulatory ankyrin repeat subunit B OS=Mus musculus OX=10090 GN=Ankrd44 PE=1 SV=1	B2RXR6	Serine/threonine-protein phosphatase 6 regulatory ankyrin repeat subunit B	Ankrd44	77787	57587	90148	72057	48120	58027	72262	59468	78951		38	36	58.4
	sp|Q8BTI7|ANR52_MOUSE Serine/threonine-protein phosphatase 6 regulatory ankyrin repeat subunit C OS=Mus musculus OX=10090 GN=Ankrd52 PE=1 SV=1	Q8BTI7	Serine/threonine-protein phosphatase 6 regulatory ankyrin repeat subunit C	Ankrd52	626	1424	0	1189	0	0	475	0	834		3	3	4.3
	sp|O35381|AN32A_MOUSE Acidic leucine-rich nuclear phosphoprotein 32 family member A OS=Mus musculus OX=10090 GN=Anp32a PE=1 SV=1	O35381;Q64G17	Acidic leucine-rich nuclear phosphoprotein 32 family member A	Anp32a	866574	792038	1055180	805693	750260	924983	1060910	819490	791997		11	8	32.4
	sp|Q9EST5|AN32B_MOUSE Acidic leucine-rich nuclear phosphoprotein 32 family member B OS=Mus musculus OX=10090 GN=Anp32b PE=1 SV=1;sp|Q9EST5-2|AN32B_MOUSE Isoform 2 of Acidic leucine-rich nuclear phosphoprotein 32 family member B OS=Mus musculus OX=10090 GN=	Q9EST5;Q9EST5-2	Acidic leucine-rich nuclear phosphoprotein 32 family member B	Anp32b	195362	158646	123062	180200	102523	230481	113349	118561	164407		8	8	26.1
	sp|P97822|AN32E_MOUSE Acidic leucine-rich nuclear phosphoprotein 32 family member E OS=Mus musculus OX=10090 GN=Anp32e PE=1 SV=2;sp|P97822-2|AN32E_MOUSE Isoform 2 of Acidic leucine-rich nuclear phosphoprotein 32 family member E OS=Mus musculus OX=10090 GN=	P97822;P97822-2;P97822-3	Acidic leucine-rich nuclear phosphoprotein 32 family member E	Anp32e	42910	56025	47488	57571	57497	59698	69298	64857	61150		7	7	46.9
	sp|P10107|ANXA1_MOUSE Annexin A1 OS=Mus musculus OX=10090 GN=Anxa1 PE=1 SV=2	P10107	Annexin A1	Anxa1	162141	138388	187923	141241	105096	111195	96669	87514	93899		19	18	67.1
	sp|P97384|ANX11_MOUSE Annexin A11 OS=Mus musculus OX=10090 GN=Anxa11 PE=1 SV=2	P97384	Annexin A11	Anxa11	104185	103008	124188	99826	88252	89423	101685	79950	97661		13	13	31.8
	sp|P07356|ANXA2_MOUSE Annexin A2 OS=Mus musculus OX=10090 GN=Anxa2 PE=1 SV=2	P07356;REV__Q8BND4	Annexin A2	Anxa2	2996540	2694280	3130340	2264000	2136910	2146730	2422210	1997670	2143660		37	37	80.2
	sp|P97429|ANXA4_MOUSE Annexin A4 OS=Mus musculus OX=10090 GN=Anxa4 PE=1 SV=4	P97429	Annexin A4	Anxa4	7041	10401	21528	5385	0	4743	10360	16388	6646		11	11	45.8
	sp|P48036|ANXA5_MOUSE Annexin A5 OS=Mus musculus OX=10090 GN=Anxa5 PE=1 SV=1	P48036	Annexin A5	Anxa5	172194	170579	194230	159174	193681	230208	153947	146689	187213		17	17	51.1
	sp|P14824|ANXA6_MOUSE Annexin A6 OS=Mus musculus OX=10090 GN=Anxa6 PE=1 SV=3	P14824	Annexin A6	Anxa6	1676100	1632120	2096270	1643080	1426930	1391630	1883690	1388990	1534130		64	62	80.4
	sp|Q07076|ANXA7_MOUSE Annexin A7 OS=Mus musculus OX=10090 GN=Anxa7 PE=1 SV=2	Q07076	Annexin A7	Anxa7	49070	55396	78174	78313	37144	55664	82692	53796	52337		14	14	35.4
	sp|O35643|AP1B1_MOUSE AP-1 complex subunit beta-1 OS=Mus musculus OX=10090 GN=Ap1b1 PE=1 SV=2	O35643	AP-1 complex subunit beta-1	Ap1b1	12000	11179	19841	13809	15142	14923	12684	8089	8260		17	17	42.9
	sp|P22892|AP1G1_MOUSE AP-1 complex subunit gamma-1 OS=Mus musculus OX=10090 GN=Ap1g1 PE=1 SV=3	P22892	AP-1 complex subunit gamma-1	Ap1g1	16714	17159	18960	11317	11727	11336	23756	6791	7150		16	16	23.8
	sp|O88512|AP1G2_MOUSE AP-1 complex subunit gamma-like 2 OS=Mus musculus OX=10090 GN=Ap1g2 PE=1 SV=2	O88512	AP-1 complex subunit gamma-like 2	Ap1g2	1739	0	2173	1272	1610	1710	1395	2032	1630		9	9	15
	sp|P35585|AP1M1_MOUSE AP-1 complex subunit mu-1 OS=Mus musculus OX=10090 GN=Ap1m1 PE=1 SV=3	P35585;Q9WVP1;Q9WVP1-2	AP-1 complex subunit mu-1	Ap1m1	51801	42231	43912	67682	25078	27479	82039	30116	37541		14	14	39.7
	sp|P61967|AP1S1_MOUSE AP-1 complex subunit sigma-1A OS=Mus musculus OX=10090 GN=Ap1s1 PE=1 SV=1	P61967	AP-1 complex subunit sigma-1A	Ap1s1	23695	13005	18638	12592	11344	11416	22176	18831	5367		4	3	25.3
	sp|P17426-2|AP2A1_MOUSE Isoform B of AP-2 complex subunit alpha-1 OS=Mus musculus OX=10090 GN=Ap2a1;sp|P17426|AP2A1_MOUSE AP-2 complex subunit alpha-1 OS=Mus musculus OX=10090 GN=Ap2a1 PE=1 SV=1	P17426-2;P17426	AP-2 complex subunit alpha-1	Ap2a1	24805	14936	16003	14184	15205	12127	11785	10861	13970		17	17	31.4
	sp|P17427|AP2A2_MOUSE AP-2 complex subunit alpha-2 OS=Mus musculus OX=10090 GN=Ap2a2 PE=1 SV=2	P17427	AP-2 complex subunit alpha-2	Ap2a2	54486	35374	44244	32077	30166	36307	29836	37070	32198		30	23	41.9
	sp|Q9DBG3|AP2B1_MOUSE AP-2 complex subunit beta OS=Mus musculus OX=10090 GN=Ap2b1 PE=1 SV=1;sp|Q9DBG3-2|AP2B1_MOUSE Isoform 2 of AP-2 complex subunit beta OS=Mus musculus OX=10090 GN=Ap2b1	Q9DBG3;Q9DBG3-2	AP-2 complex subunit beta	Ap2b1	133198	118575	141681	113390	100067	95138	107175	101257	124136		37	20	43.4
	sp|P84091|AP2M1_MOUSE AP-2 complex subunit mu OS=Mus musculus OX=10090 GN=Ap2m1 PE=1 SV=1	P84091	AP-2 complex subunit mu	Ap2m1	112717	73842	80145	84472	49080	54647	88012	63489	55788		13	13	36.1
	sp|Q9Z1T1|AP3B1_MOUSE AP-3 complex subunit beta-1 OS=Mus musculus OX=10090 GN=Ap3b1 PE=1 SV=2	Q9Z1T1;Q9JME5	AP-3 complex subunit beta-1	Ap3b1	12166	11648	16494	13356	8568	7442	14579	7277	10308		15	15	15.1
	sp|O54774|AP3D1_MOUSE AP-3 complex subunit delta-1 OS=Mus musculus OX=10090 GN=Ap3d1 PE=1 SV=1	O54774	AP-3 complex subunit delta-1	Ap3d1	11340	6082	10061	8925	4810	1740	9355	4971	7389		19	19	21.5
	sp|Q9JKC8|AP3M1_MOUSE AP-3 complex subunit mu-1 OS=Mus musculus OX=10090 GN=Ap3m1 PE=1 SV=1	Q9JKC8;Q8R2R9	AP-3 complex subunit mu-1	Ap3m1	15585	20786	12439	18510	9703	11863	19888	13411	10533		8	8	30.9
	sp|Q9DCR2|AP3S1_MOUSE AP-3 complex subunit sigma-1 OS=Mus musculus OX=10090 GN=Ap3s1 PE=1 SV=2	Q9DCR2	AP-3 complex subunit sigma-1	Ap3s1	2925	3273	3138	2737	0	3061	0	2515	0		2	2	16.1
	sp|O88879|APAF_MOUSE Apoptotic protease-activating factor 1 OS=Mus musculus OX=10090 GN=Apaf1 PE=1 SV=3;sp|O88879-2|APAF_MOUSE Isoform 2 of Apoptotic protease-activating factor 1 OS=Mus musculus OX=10090 GN=Apaf1	O88879;O88879-2	Apoptotic protease-activating factor 1	Apaf1	2857	5686	2027	6622	2448	725	2058	1079	2814		13	13	15.9
	sp|Q8R5A3|AB1IP_MOUSE Amyloid beta A4 precursor protein-binding family B member 1-interacting protein OS=Mus musculus OX=10090 GN=Apbb1ip PE=1 SV=2	Q8R5A3;S4R2K5;F2Z4B7;G5E867;F2Z3U3	Amyloid beta A4 precursor protein-binding family B member 1-interacting protein	Apbb1ip	21524	25536	37706	24348	31087	18027	30929	21389	22039		12	12	24.5
	sp|Q8R146|APEH_MOUSE Acylamino-acid-releasing enzyme OS=Mus musculus OX=10090 GN=Apeh PE=1 SV=3;sp|Q8R146-2|APEH_MOUSE Isoform 2 of Acylamino-acid-releasing enzyme OS=Mus musculus OX=10090 GN=Apeh	Q8R146;Q8R146-2	Acylamino-acid-releasing enzyme	Apeh	22953	8563	28335	20032	12967	4022	20789	20101	12238		19	19	38.4
	sp|P28352|APEX1_MOUSE DNA-(apurinic or apyrimidinic site) lyase OS=Mus musculus OX=10090 GN=Apex1 PE=1 SV=2	P28352	DNA-(apurinic or apyrimidinic site) lyase;DNA-(apurinic or apyrimidinic site) lyase, mitochondrial	Apex1	88575	95992	176822	105161	110061	118183	114673	114063	150635		13	13	59
	sp|O35841|API5_MOUSE Apoptosis inhibitor 5 OS=Mus musculus OX=10090 GN=Api5 PE=1 SV=2	O35841	Apoptosis inhibitor 5	Api5	105935	62908	95073	89437	89289	119490	103120	91442	107818		20	20	42.9
	sp|Q9WVQ5|MTNB_MOUSE Methylthioribulose-1-phosphate dehydratase OS=Mus musculus OX=10090 GN=Apip PE=1 SV=1	Q9WVQ5	Methylthioribulose-1-phosphate dehydratase	Apip	13150	9514	8055	21210	16122	11201	20834	12524	5391		6	6	38.6
	sp|Q9D7N9|APMAP_MOUSE Adipocyte plasma membrane-associated protein OS=Mus musculus OX=10090 GN=Apmap PE=1 SV=1	Q9D7N9	Adipocyte plasma membrane-associated protein	Apmap	16125	23145	25101	27197	27408	20302	31158	33665	5176		8	8	22.2
	sp|E9Q414|APOB_MOUSE Apolipoprotein B-100 OS=Mus musculus OX=10090 GN=Apob PE=1 SV=1	E9Q414	Apolipoprotein B-100;Apolipoprotein B-48	Apob	521	396	573	1029	1123	949	519	636	416		2	2	0.8
	sp|Q99J72-3|ABEC3_MOUSE Isoform 3 of DNA dC->dU-editing enzyme APOBEC-3 OS=Mus musculus OX=10090 GN=Apobec3;sp|Q99J72-4|ABEC3_MOUSE Isoform 4 of DNA dC->dU-editing enzyme APOBEC-3 OS=Mus musculus OX=10090 GN=Apobec3;sp|Q99J72-2|ABEC3_MOUSE Isoform 2 of DNA	Q99J72-3;Q99J72-4;Q99J72-2;Q99J72	DNA dC->dU-editing enzyme APOBEC-3	Apobec3	181841	176454	221280	163533	165224	170367	250212	176651	193818		22	22	50.8
	sp|Q8VBT6|APOBR_MOUSE Apolipoprotein B receptor OS=Mus musculus OX=10090 GN=Apobr PE=1 SV=1	Q8VBT6	Apolipoprotein B receptor	Apobr	0	1077	751	0	0	1175	0	1012	736		2	2	2.7
	sp|Q78IK4|MIC27_MOUSE MICOS complex subunit Mic27 OS=Mus musculus OX=10090 GN=Apool PE=1 SV=1	Q78IK4	MICOS complex subunit Mic27	Apool	36397	29590	24350	33797	11748	16853	26268	32836	24313		11	11	52.1
	sp|Q8K3H0|DP13A_MOUSE DCC-interacting protein 13-alpha OS=Mus musculus OX=10090 GN=Appl1 PE=1 SV=1	Q8K3H0	DCC-interacting protein 13-alpha	Appl1	4185	2449	5816	6753	6578	1728	3600	3833	3412		9	9	23.5
	sp|P08030|APT_MOUSE Adenine phosphoribosyltransferase OS=Mus musculus OX=10090 GN=Aprt PE=1 SV=2	P08030	Adenine phosphoribosyltransferase	Aprt	379199	407329	449238	377684	232030	361695	263014	334643	336527		9	9	63.3
	sp|Q8CFQ3|AQR_MOUSE RNA helicase aquarius OS=Mus musculus OX=10090 GN=Aqr PE=1 SV=2	Q8CFQ3	Intron-binding protein aquarius	Aqr	4718	4030	8387	6488	5339	5841	7150	7432	9922		25	25	23.5
	sp|P04627|ARAF_MOUSE Serine/threonine-protein kinase A-Raf OS=Mus musculus OX=10090 GN=Araf PE=1 SV=2	P04627;P28028-2;P28028	Serine/threonine-protein kinase A-Raf	Araf	5365	4596	6735	5142	1352	5082	7790	1915	1465		5	3	10.8
	sp|Q4LDD4-3|ARAP1_MOUSE Isoform 3 of Arf-GAP with Rho-GAP domain, ANK repeat and PH domain-containing protein 1 OS=Mus musculus OX=10090 GN=Arap1;sp|Q4LDD4-2|ARAP1_MOUSE Isoform 2 of Arf-GAP with Rho-GAP domain, ANK repeat and PH domain-containing protein	Q4LDD4-3;Q4LDD4-2;Q4LDD4	Arf-GAP with Rho-GAP domain, ANK repeat and PH domain-containing protein 1	Arap1	3147	1880	2580	0	1580	1556	1240	0	1082		5	5	7.4
	sp|Q8BZ05|ARAP2_MOUSE Arf-GAP with Rho-GAP domain, ANK repeat and PH domain-containing protein 2 OS=Mus musculus OX=10090 GN=Arap2 PE=1 SV=2	Q8BZ05	Arf-GAP with Rho-GAP domain, ANK repeat and PH domain-containing protein 2	Arap2	0	0	274	190	394	280	806	547	205		2	2	1.5
	sp|Q5XJY5|COPD_MOUSE Coatomer subunit delta OS=Mus musculus OX=10090 GN=Arcn1 PE=1 SV=2	Q5XJY5	Coatomer subunit delta	Arcn1	193871	187168	171128	148928	130575	142583	173208	168887	160554		24	24	48.3
	sp|P84078|ARF1_MOUSE ADP-ribosylation factor 1 OS=Mus musculus OX=10090 GN=Arf1 PE=1 SV=2;sp|P61205|ARF3_MOUSE ADP-ribosylation factor 3 OS=Mus musculus OX=10090 GN=Arf3 PE=2 SV=2;sp|Q8BSL7|ARF2_MOUSE ADP-ribosylation factor 2 OS=Mus musculus OX=10090 GN=A	P84078;P61205;Q8BSL7	ADP-ribosylation factor 1;ADP-ribosylation factor 3;ADP-ribosylation factor 2	Arf1;Arf3;Arf2	952942	654951	711965	750809	418315	586612	963261	488257	521753		9	6	69.6
	sp|P61750|ARF4_MOUSE ADP-ribosylation factor 4 OS=Mus musculus OX=10090 GN=Arf4 PE=1 SV=2	P61750	ADP-ribosylation factor 4	Arf4	47204	90194	14453	25565	34692	32336	32474	22615	24914		3	3	54.4
	sp|P84084|ARF5_MOUSE ADP-ribosylation factor 5 OS=Mus musculus OX=10090 GN=Arf5 PE=1 SV=2	P84084	ADP-ribosylation factor 5	Arf5	141563	139126	132722	130918	70668	75017	112455	90474	57574		5	4	76.1
	sp|P62331|ARF6_MOUSE ADP-ribosylation factor 6 OS=Mus musculus OX=10090 GN=Arf6 PE=1 SV=2	P62331	ADP-ribosylation factor 6	Arf6	151565	72693	165585	140999	75377	144236	136796	135998	126064		11	11	75.4
	sp|Q99K28|ARFG2_MOUSE ADP-ribosylation factor GTPase-activating protein 2 OS=Mus musculus OX=10090 GN=Arfgap2 PE=1 SV=1;sp|Q99K28-2|ARFG2_MOUSE Isoform 2 of ADP-ribosylation factor GTPase-activating protein 2 OS=Mus musculus OX=10090 GN=Arfgap2	Q99K28;Q99K28-2;Q9D8S3	ADP-ribosylation factor GTPase-activating protein 2	Arfgap2	25033	16325	30090	19702	4393	11567	15493	3144	10447		13	13	30.6
	sp|G3X9K3|BIG1_MOUSE Brefeldin A-inhibited guanine nucleotide-exchange protein 1 OS=Mus musculus OX=10090 GN=Arfgef1 PE=1 SV=1	G3X9K3	Brefeldin A-inhibited guanine nucleotide-exchange protein 1	Arfgef1	382	2578	1857	1776	1800	3513	1945	1204	1215		11	7	7.5
	sp|A2A5R2|BIG2_MOUSE Brefeldin A-inhibited guanine nucleotide-exchange protein 2 OS=Mus musculus OX=10090 GN=Arfgef2 PE=1 SV=1	A2A5R2	Brefeldin A-inhibited guanine nucleotide-exchange protein 2	Arfgef2	514	376	0	252	0	0	0	426	563		6	6	7.2
	tr|G5E8V9|G5E8V9_MOUSE ADP-ribosylation factor-interacting protein 1 OS=Mus musculus OX=10090 GN=Arfip1 PE=1 SV=1;tr|A2RSX9|A2RSX9_MOUSE ADP-ribosylation factor-interacting protein 1 OS=Mus musculus OX=10090 GN=Arfip1 PE=1 SV=1;tr|E9Q3G5|E9Q3G5_MOUSE ADP-r	G5E8V9;A2RSX9;E9Q3G5		Arfip1	5042	14422	12147	5483	4321	7516	7878	4313	16793		5	5	18.2
	sp|Q3UL36|ARGL1_MOUSE Arginine and glutamate-rich protein 1 OS=Mus musculus OX=10090 GN=Arglu1 PE=1 SV=2;sp|Q3UL36-2|ARGL1_MOUSE Isoform 2 of Arginine and glutamate-rich protein 1 OS=Mus musculus OX=10090 GN=Arglu1	Q3UL36;Q3UL36-2	Arginine and glutamate-rich protein 1	Arglu1	23002	51037	52787	47730	44941	32088	35051	34517	62108		4	4	11.4
	sp|Q5FWK3|RHG01_MOUSE Rho GTPase-activating protein 1 OS=Mus musculus OX=10090 GN=Arhgap1 PE=1 SV=1	Q5FWK3	Rho GTPase-activating protein 1	Arhgap1	85433	56615	44151	80209	70414	79880	63410	67022	50571		18	18	51.7
	sp|Q811M1|RHG15_MOUSE Rho GTPase-activating protein 15 OS=Mus musculus OX=10090 GN=Arhgap15 PE=1 SV=1	Q811M1;Q811M1-2;Q811M1-4;Q811M1-3	Rho GTPase-activating protein 15	Arhgap15	5285	0	6336	9119	3842	10909	7724	4563	3276		7	6	17.3
	sp|Q3UIA2-4|RHG17_MOUSE Isoform 4 of Rho GTPase-activating protein 17 OS=Mus musculus OX=10090 GN=Arhgap17;sp|Q3UIA2-3|RHG17_MOUSE Isoform 3 of Rho GTPase-activating protein 17 OS=Mus musculus OX=10090 GN=Arhgap17;sp|Q3UIA2-2|RHG17_MOUSE Isoform 2 of Rho G	Q3UIA2-4;Q3UIA2-3;Q3UIA2-2;Q3UIA2	Rho GTPase-activating protein 17	Arhgap17	6572	1608	3274	4419	3003	3299	3623	2756	2246		5	5	10.9
	sp|Q8K0Q5|RHG18_MOUSE Rho GTPase-activating protein 18 OS=Mus musculus OX=10090 GN=Arhgap18 PE=1 SV=1	Q8K0Q5	Rho GTPase-activating protein 18	Arhgap18	0	1533	3554	0	992	3149	1102	1213	731		7	7	13.9
	sp|Q8BYW1|RHG25_MOUSE Rho GTPase-activating protein 25 OS=Mus musculus OX=10090 GN=Arhgap25 PE=1 SV=2;sp|Q8BYW1-2|RHG25_MOUSE Isoform 2 of Rho GTPase-activating protein 25 OS=Mus musculus OX=10090 GN=Arhgap25;sp|Q8BYW1-3|RHG25_MOUSE Isoform 3 of Rho GTPase	Q8BYW1;Q8BYW1-2;Q8BYW1-3	Rho GTPase-activating protein 25	Arhgap25	3371	2562	3786	1127	3579	772	5158	0	5586		7	7	15.3
	sp|Q6ZQ82|RHG26_MOUSE Rho GTPase-activating protein 26 OS=Mus musculus OX=10090 GN=Arhgap26 PE=1 SV=3	Q6ZQ82	Rho GTPase-activating protein 26	Arhgap26	0	590	0	3249	719	3487	3587	2477	1955		6	6	10.2
	sp|A2AB59-2|RHG27_MOUSE Isoform 2 of Rho GTPase-activating protein 27 OS=Mus musculus OX=10090 GN=Arhgap27;sp|A2AB59|RHG27_MOUSE Rho GTPase-activating protein 27 OS=Mus musculus OX=10090 GN=Arhgap27 PE=1 SV=1	A2AB59-2;A2AB59	Rho GTPase-activating protein 27	Arhgap27	0	0	1209	1116	1176	1246	1062	911	1069		4	4	7.6
	sp|Q640N3-2|RHG30_MOUSE Isoform 2 of Rho GTPase-activating protein 30 OS=Mus musculus OX=10090 GN=Arhgap30;sp|Q640N3|RHG30_MOUSE Rho GTPase-activating protein 30 OS=Mus musculus OX=10090 GN=Arhgap30 PE=1 SV=3	Q640N3-2;Q640N3	Rho GTPase-activating protein 30	Arhgap30	6650	7923	5344	8303	6461	3803	8916	5274	5674		15	14	19.2
	sp|A6X8Z5|RHG31_MOUSE Rho GTPase-activating protein 31 OS=Mus musculus OX=10090 GN=Arhgap31 PE=1 SV=1	A6X8Z5	Rho GTPase-activating protein 31	Arhgap31	0	0	428	488	289	418	624	365	408		2	2	2
	tr|B1AUX5|B1AUX5_MOUSE Rho GTPase activating protein 4, isoform CRA_b OS=Mus musculus OX=10090 GN=Arhgap4 PE=1 SV=1;tr|Q80Z68|Q80Z68_MOUSE Rho GTPase activating protein 4, isoform CRA_f OS=Mus musculus OX=10090 GN=Arhgap4 PE=1 SV=1;tr|B1AUY3|B1AUY3_MOUSE R	B1AUX5;Q80Z68;B1AUY3;E9PYS6;B1AUY2;Q3TE27;E9Q4R3;F6SL55;F6YWG4		Arhgap4	7433	6658	10986	11205	22024	10480	10588	8632	11520		19	17	28.4
	sp|Q99PT1|GDIR1_MOUSE Rho GDP-dissociation inhibitor 1 OS=Mus musculus OX=10090 GN=Arhgdia PE=1 SV=3	Q99PT1	Rho GDP-dissociation inhibitor 1	Arhgdia	1783840	1868730	1993610	1613850	1637150	1535120	1827080	1288580	1674410		14	14	73.5
	sp|Q61599|GDIR2_MOUSE Rho GDP-dissociation inhibitor 2 OS=Mus musculus OX=10090 GN=Arhgdib PE=1 SV=3	Q61599	Rho GDP-dissociation inhibitor 2	Arhgdib	1460920	1566780	1598670	1261510	1104290	1221790	1481270	978315	1471890		15	15	70
	sp|Q61210-5|ARHG1_MOUSE Isoform 5 of Rho guanine nucleotide exchange factor 1 OS=Mus musculus OX=10090 GN=Arhgef1;sp|Q61210-2|ARHG1_MOUSE Isoform 2 of Rho guanine nucleotide exchange factor 1 OS=Mus musculus OX=10090 GN=Arhgef1;sp|Q61210|ARHG1_MOUSE Rho gu	Q61210-5;Q61210-2;Q61210;Q61210-4;Q61210-3	Rho guanine nucleotide exchange factor 1	Arhgef1	126778	111599	177784	145898	99072	92047	168082	126117	106327		40	40	46.8
	sp|Q60875-5|ARHG2_MOUSE Isoform 5 of Rho guanine nucleotide exchange factor 2 OS=Mus musculus OX=10090 GN=Arhgef2;sp|Q60875-4|ARHG2_MOUSE Isoform 4 of Rho guanine nucleotide exchange factor 2 OS=Mus musculus OX=10090 GN=Arhgef2;sp|Q60875|ARHG2_MOUSE Rho gu	Q60875-5;Q60875-4;Q60875;Q60875-2;Q60875-3	Rho guanine nucleotide exchange factor 2	Arhgef2	29789	23627	58751	35458	32038	20895	34515	19224	32363		27	27	36.7
	sp|Q8K4I3|ARHG6_MOUSE Rho guanine nucleotide exchange factor 6 OS=Mus musculus OX=10090 GN=Arhgef6 PE=1 SV=1	Q8K4I3	Rho guanine nucleotide exchange factor 6	Arhgef6	32982	29530	50579	51282	27850	31644	34148	24471	26573		25	22	48.2
	sp|A2BH40-4|ARI1A_MOUSE Isoform 4 of AT-rich interactive domain-containing protein 1A OS=Mus musculus OX=10090 GN=Arid1a;sp|A2BH40-2|ARI1A_MOUSE Isoform 2 of AT-rich interactive domain-containing protein 1A OS=Mus musculus OX=10090 GN=Arid1a;sp|A2BH40|ARI1	A2BH40-4;A2BH40-2;A2BH40;A2BH40-3	AT-rich interactive domain-containing protein 1A	Arid1a	6457	4666	6616	9444	5664	7533	5782	8543	6043		17	15	14.5
	sp|E9Q7E2|ARID2_MOUSE AT-rich interactive domain-containing protein 2 OS=Mus musculus OX=10090 GN=Arid2 PE=1 SV=1	E9Q7E2		Arid2	906	561	497	351	863	463	885	730	914		8	8	7
	sp|Q9Z1K5|ARI1_MOUSE E3 ubiquitin-protein ligase ARIH1 OS=Mus musculus OX=10090 GN=Arih1 PE=1 SV=3	Q9Z1K5	E3 ubiquitin-protein ligase ARIH1	Arih1	31262	16275	18506	18041	8222	14992	26763	14373	15853		12	12	30.1
	sp|P61211|ARL1_MOUSE ADP-ribosylation factor-like protein 1 OS=Mus musculus OX=10090 GN=Arl1 PE=1 SV=1	P61211	ADP-ribosylation factor-like protein 1	Arl1	48669	61345	84111	63080	43000	45620	74152	45963	45608		5	5	40.3
	sp|Q9WUL7|ARL3_MOUSE ADP-ribosylation factor-like protein 3 OS=Mus musculus OX=10090 GN=Arl3 PE=1 SV=1	Q9WUL7	ADP-ribosylation factor-like protein 3	Arl3	18212	17319	13419	26037	20432	18684	22496	13142	10630		5	5	45.6
	sp|Q9JKW0|AR6P1_MOUSE ADP-ribosylation factor-like protein 6-interacting protein 1 OS=Mus musculus OX=10090 GN=Arl6ip1 PE=1 SV=1	Q9JKW0	ADP-ribosylation factor-like protein 6-interacting protein 1	Arl6ip1	0	0	0	0	37765	45633	55919	48090	36762		2	2	8.9
	sp|Q8R5J9|PRAF3_MOUSE PRA1 family protein 3 OS=Mus musculus OX=10090 GN=Arl6ip5 PE=1 SV=2	Q8R5J9	PRA1 family protein 3	Arl6ip5	118530	41352	60631	47877	97832	131348	132604	102780	68331		6	6	30.9
	sp|Q8VEH3|ARL8A_MOUSE ADP-ribosylation factor-like protein 8A OS=Mus musculus OX=10090 GN=Arl8a PE=1 SV=1	Q8VEH3	ADP-ribosylation factor-like protein 8A	Arl8a	32346	13456	11146	9464	7978	7612	11883	9089	0		2	2	40.9
	sp|Q9CQW2|ARL8B_MOUSE ADP-ribosylation factor-like protein 8B OS=Mus musculus OX=10090 GN=Arl8b PE=1 SV=1	Q9CQW2	ADP-ribosylation factor-like protein 8B	Arl8b	215852	159039	206340	149833	106825	104914	117775	130357	162431		10	3	38.7
	sp|Q9D0L7-2|ARM10_MOUSE Isoform 2 of Armadillo repeat-containing protein 10 OS=Mus musculus OX=10090 GN=Armc10;sp|Q9D0L7|ARM10_MOUSE Armadillo repeat-containing protein 10 OS=Mus musculus OX=10090 GN=Armc10 PE=1 SV=1	Q9D0L7-2;Q9D0L7	Armadillo repeat-containing protein 10	Armc10	8665	13136	13202	11810	3795	11742	14046	13600	11031		4	4	19.5
	sp|Q8BNU0|ARMC6_MOUSE Armadillo repeat-containing protein 6 OS=Mus musculus OX=10090 GN=Armc6 PE=1 SV=1;sp|Q8BNU0-2|ARMC6_MOUSE Isoform 2 of Armadillo repeat-containing protein 6 OS=Mus musculus OX=10090 GN=Armc6	Q8BNU0;Q8BNU0-2	Armadillo repeat-containing protein 6	Armc6	5933	0	17757	4623	2666	3360	1477	1321	6185		4	4	14.1
	sp|Q9DBR3|ARMC8_MOUSE Armadillo repeat-containing protein 8 OS=Mus musculus OX=10090 GN=Armc8 PE=1 SV=2;sp|Q9DBR3-2|ARMC8_MOUSE Isoform 2 of Armadillo repeat-containing protein 8 OS=Mus musculus OX=10090 GN=Armc8;sp|Q9DBR3-3|ARMC8_MOUSE Isoform 3 of Armadi	Q9DBR3;Q9DBR3-2;Q9DBR3-3	Armadillo repeat-containing protein 8	Armc8	4661	2965	3896	0	5059	3579	2820	6542	3311		7	7	10.8
	sp|Q9R0Q6|ARC1A_MOUSE Actin-related protein 2/3 complex subunit 1A OS=Mus musculus OX=10090 GN=Arpc1a PE=1 SV=1	Q9R0Q6	Actin-related protein 2/3 complex subunit 1A	Arpc1a	12703	1130	9184	15326	4626	8333	17997	8097	7382		6	6	29.2
	sp|Q9WV32|ARC1B_MOUSE Actin-related protein 2/3 complex subunit 1B OS=Mus musculus OX=10090 GN=Arpc1b PE=1 SV=4	Q9WV32	Actin-related protein 2/3 complex subunit 1B	Arpc1b	852971	642250	562464	572601	594148	514147	504759	474469	528868		21	20	65.6
	sp|Q9CVB6|ARPC2_MOUSE Actin-related protein 2/3 complex subunit 2 OS=Mus musculus OX=10090 GN=Arpc2 PE=1 SV=3	Q9CVB6	Actin-related protein 2/3 complex subunit 2	Arpc2	976552	1017140	1417840	877619	617873	752255	1064180	684462	821328		21	21	72
	sp|Q9JM76|ARPC3_MOUSE Actin-related protein 2/3 complex subunit 3 OS=Mus musculus OX=10090 GN=Arpc3 PE=1 SV=3	Q9JM76	Actin-related protein 2/3 complex subunit 3	Arpc3	119242	150743	138434	95375	90510	461461	128606	160534	117056		7	7	34.8
	sp|P59999|ARPC4_MOUSE Actin-related protein 2/3 complex subunit 4 OS=Mus musculus OX=10090 GN=Arpc4 PE=1 SV=3	P59999	Actin-related protein 2/3 complex subunit 4	Arpc4	842410	1034710	1217390	735170	827880	879372	1268350	947789	971781		14	14	74.4
	sp|Q9CPW4|ARPC5_MOUSE Actin-related protein 2/3 complex subunit 5 OS=Mus musculus OX=10090 GN=Arpc5 PE=1 SV=3	Q9CPW4	Actin-related protein 2/3 complex subunit 5	Arpc5	564981	494372	571687	422986	388583	435831	573783	365770	410926		10	10	67.5
	sp|Q9D898|ARP5L_MOUSE Actin-related protein 2/3 complex subunit 5-like protein OS=Mus musculus OX=10090 GN=Arpc5l PE=1 SV=1	Q9D898	Actin-related protein 2/3 complex subunit 5-like protein	Arpc5l	48344	41425	80868	49023	13705	50419	52981	30659	11403		3	3	31.4
	sp|P56212|ARP19_MOUSE cAMP-regulated phosphoprotein 19 OS=Mus musculus OX=10090 GN=Arpp19 PE=1 SV=2;sp|P56212-2|ARP19_MOUSE Isoform ARPP-16 of cAMP-regulated phosphoprotein 19 OS=Mus musculus OX=10090 GN=Arpp19	P56212;P56212-2;P60840-2;P60840	cAMP-regulated phosphoprotein 19	Arpp19	38701	0	27899	0	15684	31726	30765	14857	6287		4	4	46.4
	sp|Q91YI4|ARRB2_MOUSE Beta-arrestin-2 OS=Mus musculus OX=10090 GN=Arrb2 PE=1 SV=1;sp|Q91YI4-2|ARRB2_MOUSE Isoform 2 of Beta-arrestin-2 OS=Mus musculus OX=10090 GN=Arrb2	Q91YI4;Q91YI4-2	Beta-arrestin-2	Arrb2	84049	78682	86499	78986	68009	70374	93963	64499	82794		13	13	49.5
	sp|P50429|ARSB_MOUSE Arylsulfatase B OS=Mus musculus OX=10090 GN=Arsb PE=1 SV=3;sp|P50429-2|ARSB_MOUSE Isoform 2 of Arylsulfatase B OS=Mus musculus OX=10090 GN=Arsb	P50429;P50429-2	Arylsulfatase B	Arsb	5077	13383	8443	2731	6566	8321	13095	2914	7333		9	9	19.7
	sp|Q9WV54|ASAH1_MOUSE Acid ceramidase OS=Mus musculus OX=10090 GN=Asah1 PE=1 SV=1	Q9WV54	Acid ceramidase;Acid ceramidase subunit alpha;Acid ceramidase subunit beta	Asah1	4802	0	1120	1219	1082	1154	1861	2424	0		3	3	9.1
	sp|Q91ZU1|ASB6_MOUSE Ankyrin repeat and SOCS box protein 6 OS=Mus musculus OX=10090 GN=Asb6 PE=1 SV=1	Q91ZU1	Ankyrin repeat and SOCS box protein 6	Asb6	1545	995	1943	0	0	1361	3431	0	3986		5	5	12.7
	sp|Q91WR3-2|ASCC2_MOUSE Isoform 2 of Activating signal cointegrator 1 complex subunit 2 OS=Mus musculus OX=10090 GN=Ascc2;sp|Q91WR3|ASCC2_MOUSE Activating signal cointegrator 1 complex subunit 2 OS=Mus musculus OX=10090 GN=Ascc2 PE=1 SV=1;sp|Q91WR3-3|ASCC2	Q91WR3-2;Q91WR3;Q91WR3-3	Activating signal cointegrator 1 complex subunit 2	Ascc2	1595	0	2060	1421	0	0	1628	1186	957		1	1	1.8
	sp|E9PZJ8|ASCC3_MOUSE Activating signal cointegrator 1 complex subunit 3 OS=Mus musculus OX=10090 GN=Ascc3 PE=1 SV=1	E9PZJ8	Activating signal cointegrator 1 complex subunit 3	Ascc3	0	772	702	0	0	134	712	1060	773		2	2	1.3
	sp|Q9DAP7|ASF1B_MOUSE Histone chaperone ASF1B OS=Mus musculus OX=10090 GN=Asf1b PE=1 SV=1	Q9DAP7	Histone chaperone ASF1B	Asf1b	37892	32461	0	31561	33556	35132	40441	36976	33802		3	2	18.3
	sp|Q91X20|ASH2L_MOUSE Set1/Ash2 histone methyltransferase complex subunit ASH2 OS=Mus musculus OX=10090 GN=Ash2l PE=1 SV=1	Q91X20	Set1/Ash2 histone methyltransferase complex subunit ASH2	Ash2l	5439	6281	3997	11552	8490	8633	8188	13613	5381		10	10	19.6
	sp|Q91YI0|ARLY_MOUSE Argininosuccinate lyase OS=Mus musculus OX=10090 GN=Asl PE=1 SV=1	Q91YI0	Argininosuccinate lyase	Asl	14199	9909	8140	6970	4053	6036	6151	3740	693		7	7	21.8
	sp|O54984|ASNA_MOUSE ATPase Asna1 OS=Mus musculus OX=10090 GN=Asna1 PE=1 SV=2	O54984	ATPase Asna1	Asna1	40165	40983	54486	26794	40289	49623	31861	27519	21179		10	10	34.5
	sp|Q61024|ASNS_MOUSE Asparagine synthetase [glutamine-hydrolyzing] OS=Mus musculus OX=10090 GN=Asns PE=1 SV=3	Q61024	Asparagine synthetase [glutamine-hydrolyzing]	Asns	58816	53407	78253	43660	37346	35185	49822	53327	47649		21	21	44.4
	sp|Q8VBT9|ASPC1_MOUSE Tether containing UBX domain for GLUT4 OS=Mus musculus OX=10090 GN=Aspscr1 PE=1 SV=1;sp|Q8VBT9-3|ASPC1_MOUSE Isoform 3 of Tether containing UBX domain for GLUT4 OS=Mus musculus OX=10090 GN=Aspscr1;sp|Q8VBT9-2|ASPC1_MOUSE Isoform 2 of	Q8VBT9;Q8VBT9-3;Q8VBT9-2	Tether containing UBX domain for GLUT4	Aspscr1	539	0	3976	718	7858	4281	2818	264	2387		5	5	14.5
	sp|Q8C0M9|ASGL1_MOUSE Isoaspartyl peptidase/L-asparaginase OS=Mus musculus OX=10090 GN=Asrgl1 PE=1 SV=1	Q8C0M9	Isoaspartyl peptidase/L-asparaginase;Isoaspartyl peptidase/L-asparaginase alpha chain;Isoaspartyl peptidase/L-asparaginase beta chain	Asrgl1	11230	49917	7612	18311	5621	11130	8882	9851	11221		10	10	41.7
	sp|P16460|ASSY_MOUSE Argininosuccinate synthase OS=Mus musculus OX=10090 GN=Ass1 PE=1 SV=1	P16460	Argininosuccinate synthase	Ass1	400607	310326	358856	210386	262307	249272	309554	184718	202146		22	22	56.1
	sp|Q8QZV7|INT13_MOUSE Integrator complex subunit 13 OS=Mus musculus OX=10090 GN=IntS13 PE=1 SV=2	Q8QZV7	Protein asunder homolog	Asun	5129	5313	4911	7500	3634	4023	4644	4818	4449		5	5	10
	sp|Q9D5T0|ATAD1_MOUSE ATPase family AAA domain-containing protein 1 OS=Mus musculus OX=10090 GN=Atad1 PE=1 SV=1	Q9D5T0	ATPase family AAA domain-containing protein 1	Atad1	40658	42762	49124	41001	25242	27415	56561	46960	32355		11	11	47.9
	sp|Q8CDM1|ATAD2_MOUSE ATPase family AAA domain-containing protein 2 OS=Mus musculus OX=10090 GN=Atad2 PE=1 SV=1;sp|Q8CDM1-2|ATAD2_MOUSE Isoform 2 of ATPase family AAA domain-containing protein 2 OS=Mus musculus OX=10090 GN=Atad2	Q8CDM1;Q8CDM1-2	ATPase family AAA domain-containing protein 2	Atad2	857	2524	3374	4487	3014	2966	4642	4217	5176		12	12	19.2
	sp|Q925I1|ATAD3_MOUSE ATPase family AAA domain-containing protein 3 OS=Mus musculus OX=10090 GN=Atad3 PE=1 SV=1;sp|Q925I1-2|ATAD3_MOUSE Isoform 2 of ATPase family AAA domain-containing protein 3 OS=Mus musculus OX=10090 GN=Atad3	Q925I1;Q925I1-2;H3BKI6;H3BK90;V9GWS5	ATPase family AAA domain-containing protein 3	Atad3	5564	8309	17624	15057	11087	16280	26325	12550	21831		16	16	33.7
	sp|Q4QY64|ATAD5_MOUSE ATPase family AAA domain-containing protein 5 OS=Mus musculus OX=10090 GN=Atad5 PE=1 SV=1	Q4QY64	ATPase family AAA domain-containing protein 5	Atad5	483	0	355	562	110	144	435	316	0		4	4	3
	sp|Q7TT18|MCAF1_MOUSE Activating transcription factor 7-interacting protein 1 OS=Mus musculus OX=10090 GN=Atf7ip PE=1 SV=1	Q7TT18	Activating transcription factor 7-interacting protein 1	Atf7ip	1409	998	721	719	611	0	1159	10903	0		5	5	4.3
	sp|Q9CPX6|ATG3_MOUSE Ubiquitin-like-conjugating enzyme ATG3 OS=Mus musculus OX=10090 GN=Atg3 PE=1 SV=1	Q9CPX6	Ubiquitin-like-conjugating enzyme ATG3	Atg3	14920	21230	33439	10354	12945	16245	28391	10709	21759		5	5	22.9
	sp|Q8BGE6|ATG4B_MOUSE Cysteine protease ATG4B OS=Mus musculus OX=10090 GN=Atg4b PE=1 SV=2	Q8BGE6	Cysteine protease ATG4B	Atg4b	4416	0	8474	6665	2922	5732	8498	7596	5190		4	4	14.8
	sp|Q9D906|ATG7_MOUSE Ubiquitin-like modifier-activating enzyme ATG7 OS=Mus musculus OX=10090 GN=Atg7 PE=1 SV=1	Q9D906	Ubiquitin-like modifier-activating enzyme ATG7	Atg7	1552	966	0	0	0	868	2490	0	855		5	5	9.2
	sp|Q9CWJ9|PUR9_MOUSE Bifunctional purine biosynthesis protein PURH OS=Mus musculus OX=10090 GN=Atic PE=1 SV=2	Q9CWJ9	Bifunctional purine biosynthesis protein PURH;Phosphoribosylaminoimidazolecarboxamide formyltransferase;IMP cyclohydrolase	Atic	541388	505889	503755	475939	398365	469437	545217	365426	434163		34	34	67.7
	sp|Q6PA06-2|ATLA2_MOUSE Isoform 2 of Atlastin-2 OS=Mus musculus OX=10090 GN=Atl2;sp|Q6PA06|ATLA2_MOUSE Atlastin-2 OS=Mus musculus OX=10090 GN=Atl2 PE=1 SV=1	Q6PA06-2;Q6PA06	Atlastin-2	Atl2	3823	0	0	3315	3438	3775	4420	7611	7612		3	2	12.6
	sp|Q91YH5|ATLA3_MOUSE Atlastin-3 OS=Mus musculus OX=10090 GN=Atl3 PE=1 SV=1;sp|Q91YH5-2|ATLA3_MOUSE Isoform 2 of Atlastin-3 OS=Mus musculus OX=10090 GN=Atl3	Q91YH5;Q91YH5-2	Atlastin-3	Atl3	30644	29208	37722	42318	40300	38155	29943	33883	33249		13	12	36
	tr|Q6DFW5|Q6DFW5_MOUSE Phospholipid-transporting ATPase OS=Mus musculus OX=10090 GN=Atp11b PE=1 SV=1;tr|A0A0G2JE89|A0A0G2JE89_MOUSE Phospholipid-transporting ATPase (Fragment) OS=Mus musculus OX=10090 GN=Atp11b PE=1 SV=1	Q6DFW5;A0A0G2JE89;A0A0G2JED0	Phospholipid-transporting ATPase	Atp11b	1106	818	0	1420	0	0	295	1082	0		8	8	11.3
	sp|Q9EPE9|AT131_MOUSE Manganese-transporting ATPase 13A1 OS=Mus musculus OX=10090 GN=Atp13a1 PE=1 SV=2	Q9EPE9	Manganese-transporting ATPase 13A1	Atp13a1	12307	7855	14908	6752	7886	9076	11150	7875	9923		17	17	19.8
	sp|Q8VDN2|AT1A1_MOUSE Sodium/potassium-transporting ATPase subunit alpha-1 OS=Mus musculus OX=10090 GN=Atp1a1 PE=1 SV=1	Q8VDN2	Sodium/potassium-transporting ATPase subunit alpha-1	Atp1a1	120769	127448	124551	111527	104292	127059	133884	107698	107430		31	20	37
	sp|P97370|AT1B3_MOUSE Sodium/potassium-transporting ATPase subunit beta-3 OS=Mus musculus OX=10090 GN=Atp1b3 PE=1 SV=1	P97370	Sodium/potassium-transporting ATPase subunit beta-3	Atp1b3	183215	149972	207446	149394	159157	150009	184758	136235	143649		11	11	46.8
	sp|O55143|AT2A2_MOUSE Sarcoplasmic/endoplasmic reticulum calcium ATPase 2 OS=Mus musculus OX=10090 GN=Atp2a2 PE=1 SV=2;sp|O55143-2|AT2A2_MOUSE Isoform 2 of Sarcoplasmic/endoplasmic reticulum calcium ATPase 2 OS=Mus musculus OX=10090 GN=Atp2a2	O55143;O55143-2	Sarcoplasmic/endoplasmic reticulum calcium ATPase 2	Atp2a2	133044	121121	132630	139947	78573	89590	113298	97246	70892		36	23	37.9
	sp|Q64518-2|AT2A3_MOUSE Isoform SERCA3A of Sarcoplasmic/endoplasmic reticulum calcium ATPase 3 OS=Mus musculus OX=10090 GN=Atp2a3;sp|Q64518-3|AT2A3_MOUSE Isoform SERCA3C of Sarcoplasmic/endoplasmic reticulum calcium ATPase 3 OS=Mus musculus OX=10090 GN=Atp	Q64518-2;Q64518-3;Q64518	Sarcoplasmic/endoplasmic reticulum calcium ATPase 3	Atp2a3	13499	3419	7115	10050	12573	14215	14416	10328	11808		16	15	28
	sp|G5E829|AT2B1_MOUSE Plasma membrane calcium-transporting ATPase 1 OS=Mus musculus OX=10090 GN=Atp2b1 PE=1 SV=1	G5E829	Plasma membrane calcium-transporting ATPase 1	Atp2b1	8595	6506	6016	12771	7434	6832	7536	6357	7198		14	9	17.9
	tr|Q8C048|Q8C048_MOUSE Calcium-transporting ATPase OS=Mus musculus OX=10090 GN=Atp2b3 PE=1 SV=1;tr|A2ALL9|A2ALL9_MOUSE Calcium-transporting ATPase OS=Mus musculus OX=10090 GN=Atp2b3 PE=1 SV=1;tr|Q0VF55|Q0VF55_MOUSE Calcium-transporting ATPase OS=Mus muscul	Q8C048;A2ALL9;Q0VF55	Calcium-transporting ATPase	Atp2b3	0	1714	1602	1815	1415	1313	956	0	980		1	1	4.5
	sp|Q6Q477-2|AT2B4_MOUSE Isoform 2 of Plasma membrane calcium-transporting ATPase 4 OS=Mus musculus OX=10090 GN=Atp2b4;sp|Q6Q477|AT2B4_MOUSE Plasma membrane calcium-transporting ATPase 4 OS=Mus musculus OX=10090 GN=Atp2b4 PE=1 SV=1	Q6Q477-2;Q6Q477	Calcium-transporting ATPase	Atp2b4	5360	3490	7343	9912	6264	6309	4133	2085	5335		7	7	16.8
	sp|Q03265|ATPA_MOUSE ATP synthase subunit alpha, mitochondrial OS=Mus musculus OX=10090 GN=Atp5f1a PE=1 SV=1	Q03265	ATP synthase subunit alpha, mitochondrial	Atp5a1	1444710	1560100	1688110	1455800	1048340	1359450	1706830	1271110	1165520		36	36	68.4
	sp|P56480|ATPB_MOUSE ATP synthase subunit beta, mitochondrial OS=Mus musculus OX=10090 GN=Atp5f1b PE=1 SV=2	P56480	ATP synthase subunit beta, mitochondrial	Atp5b	1453290	1171810	1353050	1284030	1219270	1230090	1616980	1177960	959653		26	26	65.2
	sp|Q91VR2|ATPG_MOUSE ATP synthase subunit gamma, mitochondrial OS=Mus musculus OX=10090 GN=Atp5f1c PE=1 SV=1	Q91VR2	ATP synthase subunit gamma, mitochondrial	Atp5c1	302211	239667	245076	232995	181641	214313	399486	231802	188368		9	9	31.2
	sp|Q9D3D9|ATPD_MOUSE ATP synthase subunit delta, mitochondrial OS=Mus musculus OX=10090 GN=Atp5f1d PE=1 SV=1	Q9D3D9	ATP synthase subunit delta, mitochondrial	Atp5d	9575	30485	46707	37391	0	62169	33950	4427	32143		3	3	37.5
	sp|P56382|ATP5E_MOUSE ATP synthase subunit epsilon, mitochondrial OS=Mus musculus OX=10090 GN=Atp5f1e PE=1 SV=2	P56382	ATP synthase subunit epsilon, mitochondrial	Atp5e	550955	189677	167396	224602	131202	153941	239532	196294	152907		4	4	38.5
	sp|Q9CQQ7|AT5F1_MOUSE ATP synthase F(0) complex subunit B1, mitochondrial OS=Mus musculus OX=10090 GN=Atp5pb PE=1 SV=1	Q9CQQ7	ATP synthase F(0) complex subunit B1, mitochondrial	Atp5f1	55705	125302	154692	93842	65971	93914	129671	153683	98578		9	9	32.4
	sp|Q9DCX2|ATP5H_MOUSE ATP synthase subunit d, mitochondrial OS=Mus musculus OX=10090 GN=Atp5pd PE=1 SV=3	Q9DCX2	ATP synthase subunit d, mitochondrial	Atp5h	165835	150270	190182	73798	103805	304263	151823	219114	165950		9	9	53.4
	sp|Q06185|ATP5I_MOUSE ATP synthase subunit e, mitochondrial OS=Mus musculus OX=10090 GN=Atp5me PE=1 SV=2	Q06185	ATP synthase subunit e, mitochondrial	Atp5i	24513	36853	38225	27265	21303	83453	0	26974	0		2	2	32.4
	sp|P56135|ATPK_MOUSE ATP synthase subunit f, mitochondrial OS=Mus musculus OX=10090 GN=Atp5mf PE=1 SV=3	P56135	ATP synthase subunit f, mitochondrial	Atp5j2	302867	256961	174243	251719	206204	235563	246554	203246	207000		4	4	36.4
	sp|Q9CPQ8|ATP5L_MOUSE ATP synthase subunit g, mitochondrial OS=Mus musculus OX=10090 GN=Atp5mg PE=1 SV=1	Q9CPQ8	ATP synthase subunit g, mitochondrial	Atp5l	410780	412443	348326	272325	259548	478226	412953	347679	272043		5	5	48.5
	sp|Q9DB20|ATPO_MOUSE ATP synthase subunit O, mitochondrial OS=Mus musculus OX=10090 GN=Atp5po PE=1 SV=1	Q9DB20	ATP synthase subunit O, mitochondrial	Atp5o	408973	406381	436983	348448	278272	295848	409413	397367	339866		10	10	57.7
	sp|P15920|VPP2_MOUSE V-type proton ATPase 116 kDa subunit a isoform 2 OS=Mus musculus OX=10090 GN=Atp6v0a2 PE=1 SV=2	P15920	V-type proton ATPase 116 kDa subunit a isoform 2	Atp6v0a2	3150	0	1547	0	2070	2239	0	4069	2037		6	6	11.2
	sp|P63082|VATL_MOUSE V-type proton ATPase 16 kDa proteolipid subunit OS=Mus musculus OX=10090 GN=Atp6v0c PE=1 SV=1	P63082	V-type proton ATPase 16 kDa proteolipid subunit	Atp6v0c	161541	95570	117669	145792	66276	90098	157628	73526	100185		1	1	11.6
	sp|P51863|VA0D1_MOUSE V-type proton ATPase subunit d 1 OS=Mus musculus OX=10090 GN=Atp6v0d1 PE=1 SV=2	P51863	V-type proton ATPase subunit d 1	Atp6v0d1	6814	6884	0	0	0	3445	8683	9124	2507		5	5	21.9
	sp|P50516|VATA_MOUSE V-type proton ATPase catalytic subunit A OS=Mus musculus OX=10090 GN=Atp6v1a PE=1 SV=2;sp|P50516-2|VATA_MOUSE Isoform 2 of V-type proton ATPase catalytic subunit A OS=Mus musculus OX=10090 GN=Atp6v1a	P50516;P50516-2	V-type proton ATPase catalytic subunit A	Atp6v1a	61579	53355	54705	41637	43404	40577	71922	40339	56454		16	16	34.5
	sp|P62814|VATB2_MOUSE V-type proton ATPase subunit B, brain isoform OS=Mus musculus OX=10090 GN=Atp6v1b2 PE=1 SV=1	P62814;Q91YH6;A0A0U1RNU9	V-type proton ATPase subunit B, brain isoform	Atp6v1b2	45996	35581	36530	67310	51155	68958	94791	66882	55942		21	21	61.4
	sp|Q9Z1G3|VATC1_MOUSE V-type proton ATPase subunit C 1 OS=Mus musculus OX=10090 GN=Atp6v1c1 PE=1 SV=4	Q9Z1G3	V-type proton ATPase subunit C 1	Atp6v1c1	17416	10744	10359	26283	20460	18472	15660	18592	16993		12	12	45.8
	sp|P50518|VATE1_MOUSE V-type proton ATPase subunit E 1 OS=Mus musculus OX=10090 GN=Atp6v1e1 PE=1 SV=2	P50518;Q9D593	V-type proton ATPase subunit E 1	Atp6v1e1	17305	21215	72968	65671	8763	23599	40843	30428	32678		3	3	19.5
	sp|Q9CR51|VATG1_MOUSE V-type proton ATPase subunit G 1 OS=Mus musculus OX=10090 GN=Atp6v1g1 PE=1 SV=3	Q9CR51	V-type proton ATPase subunit G 1	Atp6v1g1	40801	61342	100072	41379	19482	20469	29255	21255	20124		3	3	36.4
	sp|Q8BVE3|VATH_MOUSE V-type proton ATPase subunit H OS=Mus musculus OX=10090 GN=Atp6v1h PE=1 SV=1	Q8BVE3	V-type proton ATPase subunit H	Atp6v1h	6953	6969	7150	6866	5742	3731	2305	3042	3325		7	7	20.7
	tr|A2ANX3|A2ANX3_MOUSE Phospholipid-transporting ATPase OS=Mus musculus OX=10090 GN=Atp8b4 PE=1 SV=1	A2ANX3	Phospholipid-transporting ATPase	Atp8b4	14067	7913	6646	8688	4918	6243	7697	10821	4174		1	1	0.8
	sp|O35143|ATIF1_MOUSE ATPase inhibitor, mitochondrial OS=Mus musculus OX=10090 GN=ATP5IF1 PE=1 SV=2	O35143	ATPase inhibitor, mitochondrial	Atpif1	344345	375014	440402	303100	297872	304679	315348	240926	315606		4	4	33
	sp|Q61687|ATRX_MOUSE Transcriptional regulator ATRX OS=Mus musculus OX=10090 GN=Atrx PE=1 SV=3	Q61687	Transcriptional regulator ATRX	Atrx	1705	2465	4539	5083	1823	1621	2061	3057	3303		23	23	12.7
	sp|P28658|ATX10_MOUSE Ataxin-10 OS=Mus musculus OX=10090 GN=Atxn10 PE=1 SV=2	P28658	Ataxin-10	Atxn10	38008	26233	39395	43011	15206	32249	34192	42359	25317		14	14	41.3
	sp|Q7TQH0-3|ATX2L_MOUSE Isoform 3 of Ataxin-2-like protein OS=Mus musculus OX=10090 GN=Atxn2l;sp|Q7TQH0|ATX2L_MOUSE Ataxin-2-like protein OS=Mus musculus OX=10090 GN=Atxn2l PE=1 SV=1;sp|Q7TQH0-2|ATX2L_MOUSE Isoform 2 of Ataxin-2-like protein OS=Mus musculu	Q7TQH0-3;Q7TQH0;Q7TQH0-2	Ataxin-2-like protein	Atxn2l	30278	30958	50897	23341	18311	20617	20836	21490	17428		20	20	22.4
	sp|Q9CVD2|ATX3_MOUSE Ataxin-3 OS=Mus musculus OX=10090 GN=Atxn3 PE=1 SV=2	Q9CVD2	Ataxin-3	Atxn3	1667	0	6696	6229	3410	2649	7755	0	1802		2	2	5.1
	sp|Q9JLZ3|AUHM_MOUSE Methylglutaconyl-CoA hydratase, mitochondrial OS=Mus musculus OX=10090 GN=Auh PE=1 SV=1	Q9JLZ3;Q9JLZ3-3	Methylglutaconyl-CoA hydratase, mitochondrial	Auh	3262	8532	10215	7577	9437	4178	5810	2264	6435		4	4	17.2
	sp|P70295|AUP1_MOUSE Ancient ubiquitous protein 1 OS=Mus musculus OX=10090 GN=Aup1 PE=1 SV=1	P70295	Ancient ubiquitous protein 1	Aup1	48084	14868	40226	3721	28474	31065	32958	30444	13964		7	7	32.7
	sp|Q9DCJ7|AKIP_MOUSE Aurora kinase A-interacting protein OS=Mus musculus OX=10090 GN=Aurkaip1 PE=2 SV=2	Q9DCJ7	Aurora kinase A-interacting protein	Aurkaip1	0	0	0	5039	0	4379	6156	0	3012		1	1	5
	sp|O70126|AURKB_MOUSE Aurora kinase B OS=Mus musculus OX=10090 GN=Aurkb PE=1 SV=2	O70126	Aurora kinase B	Aurkb	20122	18340	16344	32166	27184	27143	19806	26713	20788		10	9	42
	sp|Q9D9K3|AVEN_MOUSE Cell death regulator Aven OS=Mus musculus OX=10090 GN=Aven PE=1 SV=2	Q9D9K3	Cell death regulator Aven	Aven	0	3488	0	396	0	665	865	0	729		2	2	8.8
	sp|Q09200|B4GN1_MOUSE Beta-1,4 N-acetylgalactosaminyltransferase 1 OS=Mus musculus OX=10090 GN=B4galnt1 PE=1 SV=1	Q09200	Beta-1,4 N-acetylgalactosaminyltransferase 1	B4galnt1	40699	33980	36956	35468	40235	33330	44338	50038	21986		19	19	44.8
	sp|P15535-2|B4GT1_MOUSE Isoform Short of Beta-1,4-galactosyltransferase 1 OS=Mus musculus OX=10090 GN=B4galt1;sp|P15535|B4GT1_MOUSE Beta-1,4-galactosyltransferase 1 OS=Mus musculus OX=10090 GN=B4galt1 PE=1 SV=1	P15535-2;P15535	Beta-1,4-galactosyltransferase 1;Lactose synthase A protein;N-acetyllactosamine synthase;Beta-N-acetylglucosaminylglycopeptide beta-1,4-galactosyltransferase;Beta-N-acetylglucosaminyl-glycolipid beta-1,4-galactosyltransferase;Processed beta-1,4-galactosyltransferase 1	B4galt1	6719	1534	5676	3759	3017	4342	8757	2313	4386		3	3	8.5
	sp|Q9JMK0|B4GT5_MOUSE Beta-1,4-galactosyltransferase 5 OS=Mus musculus OX=10090 GN=B4galt5 PE=1 SV=2	Q9JMK0	Beta-1,4-galactosyltransferase 5	B4galt5	2197	1909	2535	2669	1443	2064	3046	2940	2031		1	1	2.1
	sp|Q3UI43|BABA1_MOUSE BRISC and BRCA1-A complex member 1 OS=Mus musculus OX=10090 GN=Babam1 PE=1 SV=1	Q3UI43	BRISC and BRCA1-A complex member 1	Babam1	11289	11032	5610	18518	11411	19170	3118	17608	9184		5	5	25.5
	sp|Q60739-2|BAG1_MOUSE Isoform 2 of BAG family molecular chaperone regulator 1 OS=Mus musculus OX=10090 GN=Bag1;sp|Q60739|BAG1_MOUSE BAG family molecular chaperone regulator 1 OS=Mus musculus OX=10090 GN=Bag1 PE=1 SV=3	Q60739-2;Q60739	BAG family molecular chaperone regulator 1	Bag1	233149	6237	0	0	11232	7688	5191	13304	14937		3	3	14.6
	sp|Q91YN9|BAG2_MOUSE BAG family molecular chaperone regulator 2 OS=Mus musculus OX=10090 GN=Bag2 PE=1 SV=1	Q91YN9	BAG family molecular chaperone regulator 2	Bag2	23855	0	0	1713	6334	0	11816	0	3825		3	3	17.6
	sp|Q8CI32|BAG5_MOUSE BAG family molecular chaperone regulator 5 OS=Mus musculus OX=10090 GN=Bag5 PE=1 SV=1	Q8CI32	BAG family molecular chaperone regulator 5	Bag5	1883	1470	5318	7574	2212	8816	4296	8028	5166		10	10	29.3
	sp|Q9Z1R2|BAG6_MOUSE Large proline-rich protein BAG6 OS=Mus musculus OX=10090 GN=Bag6 PE=1 SV=1	Q9Z1R2	Large proline-rich protein BAG6	Bag6	19474	6867	24033	4938	9217	5758	12756	11523	3770		13	13	19.8
	sp|O08734|BAK_MOUSE Bcl-2 homologous antagonist/killer OS=Mus musculus OX=10090 GN=Bak1 PE=1 SV=3	O08734	Bcl-2 homologous antagonist/killer	Bak1	9980	10922	3383	17840	0	7766	13530	8130	12868		5	5	52.6
	sp|O54962|BAF_MOUSE Barrier-to-autointegration factor OS=Mus musculus OX=10090 GN=Banf1 PE=1 SV=1	O54962	Barrier-to-autointegration factor;Barrier-to-autointegration factor, N-terminally processed	Banf1	35034	48702	75892	42865	45446	141601	53359	81491	39465		3	3	37.1
	sp|Q07813|BAX_MOUSE Apoptosis regulator BAX OS=Mus musculus OX=10090 GN=Bax PE=1 SV=1	Q07813	Apoptosis regulator BAX	Bax	180307	114584	195545	177026	115821	131102	151254	196413	135385		9	9	56.8
	sp|O88379|BAZ1A_MOUSE Bromodomain adjacent to zinc finger domain protein 1A OS=Mus musculus OX=10090 GN=Baz1a PE=1 SV=3	O88379	Bromodomain adjacent to zinc finger domain protein 1A	Baz1a	3641	3459	7646	5646	5745	3786	7767	6471	3094		20	20	18.6
	sp|Q9Z277|BAZ1B_MOUSE Tyrosine-protein kinase BAZ1B OS=Mus musculus OX=10090 GN=Baz1b PE=1 SV=2;sp|Q9Z277-2|BAZ1B_MOUSE Isoform 2 of Tyrosine-protein kinase BAZ1B OS=Mus musculus OX=10090 GN=Baz1b	Q9Z277;Q9Z277-2	Tyrosine-protein kinase BAZ1B	Baz1b	42932	31065	65324	48131	38235	53243	49703	47748	60298		42	42	37.9
	sp|Q91YE5-2|BAZ2A_MOUSE Isoform 2 of Bromodomain adjacent to zinc finger domain protein 2A OS=Mus musculus OX=10090 GN=Baz2a;sp|Q91YE5|BAZ2A_MOUSE Bromodomain adjacent to zinc finger domain protein 2A OS=Mus musculus OX=10090 GN=Baz2a PE=1 SV=2;sp|Q91YE5-3	Q91YE5-2;Q91YE5;Q91YE5-3	Bromodomain adjacent to zinc finger domain protein 2A	Baz2a	225	1032	378	1103	0	1466	1842	2093	1012		5	5	3.7
	sp|Q8R2U2|NEPRO_MOUSE Nucleolus and neural progenitor protein OS=Mus musculus OX=10090 GN=Nepro PE=2 SV=1	Q8R2U2		BC027231	2144	623	0	1938	1406	1837	2461	0	0		2	2	4.8
	sp|Q61334|BAP29_MOUSE B-cell receptor-associated protein 29 OS=Mus musculus OX=10090 GN=Bcap29 PE=1 SV=1	Q61334	B-cell receptor-associated protein 29	Bcap29	36844	113120	105111	74845	58614	38800	56094	62492	81849		7	7	31.7
	sp|Q61335|BAP31_MOUSE B-cell receptor-associated protein 31 OS=Mus musculus OX=10090 GN=Bcap31 PE=1 SV=4	Q61335	B-cell receptor-associated protein 31	Bcap31	346418	327056	301183	268492	239198	274555	306175	270423	236315		7	7	33.5
	sp|Q9D287|SPF27_MOUSE Pre-mRNA-splicing factor SPF27 OS=Mus musculus OX=10090 GN=Bcas2 PE=1 SV=1	Q9D287	Pre-mRNA-splicing factor SPF27	Bcas2	4451	0	10462	3960	0	18109	11763	29670	4518		5	5	33.8
	sp|P24288|BCAT1_MOUSE Branched-chain-amino-acid aminotransferase, cytosolic OS=Mus musculus OX=10090 GN=Bcat1 PE=1 SV=2	P24288	Branched-chain-amino-acid aminotransferase, cytosolic	Bcat1	56598	38466	48774	26581	17008	13918	65598	37437	23429		10	10	26.7
	sp|O35855|BCAT2_MOUSE Branched-chain-amino-acid aminotransferase, mitochondrial OS=Mus musculus OX=10090 GN=Bcat2 PE=1 SV=2	O35855	Branched-chain-amino-acid aminotransferase, mitochondrial	Bcat2	60106	49259	57459	50681	37854	47899	46859	40637	42785		13	13	31.8
	sp|Q9CWI3|BCCIP_MOUSE BRCA2 and CDKN1A-interacting protein OS=Mus musculus OX=10090 GN=Bccip PE=1 SV=1	Q9CWI3	BRCA2 and CDKN1A-interacting protein	Bccip	0	2961	8741	3381	6720	7059	8759	8318	5707		7	7	31.6
	sp|P10417-2|BCL2_MOUSE Isoform Beta of Apoptosis regulator Bcl-2 OS=Mus musculus OX=10090 GN=Bcl2;sp|P10417|BCL2_MOUSE Apoptosis regulator Bcl-2 OS=Mus musculus OX=10090 GN=Bcl2 PE=1 SV=3	P10417-2;P10417	Apoptosis regulator Bcl-2	Bcl2	63885	62842	71258	88638	34261	60003	104816	75078	77240		5	5	46.7
	sp|Q8K019|BCLF1_MOUSE Bcl-2-associated transcription factor 1 OS=Mus musculus OX=10090 GN=Bclaf1 PE=1 SV=2;sp|Q8K019-2|BCLF1_MOUSE Isoform 2 of Bcl-2-associated transcription factor 1 OS=Mus musculus OX=10090 GN=Bclaf1;sp|Q8K019-3|BCLF1_MOUSE Isoform 3 of	Q8K019;Q8K019-2;Q8K019-3	Bcl-2-associated transcription factor 1	Bclaf1	51175	55237	96863	41215	45626	33555	46619	40690	52341		12	12	17.6
	sp|Q80XN0|BDH_MOUSE D-beta-hydroxybutyrate dehydrogenase, mitochondrial OS=Mus musculus OX=10090 GN=Bdh1 PE=1 SV=2	Q80XN0	D-beta-hydroxybutyrate dehydrogenase, mitochondrial	Bdh1	28579	31997	35895	23467	21383	21368	25753	19186	28903		9	9	34.4
	sp|O88597|BECN1_MOUSE Beclin-1 OS=Mus musculus OX=10090 GN=Becn1 PE=1 SV=3	O88597	Beclin-1	Becn1	0	0	0	2506	1241	1857	23413	1921	0		3	3	8.9
	sp|O35185|BHE40_MOUSE Class E basic helix-loop-helix protein 40 OS=Mus musculus OX=10090 GN=Bhlhe40 PE=1 SV=1	O35185	Class E basic helix-loop-helix protein 40	Bhlhe40	0	0	0	4150	4014	4525	7405	7137	3516		1	1	2.9
	sp|Q921C5-2|BICD2_MOUSE Isoform 2 of Protein bicaudal D homolog 2 OS=Mus musculus OX=10090 GN=Bicd2;sp|Q921C5|BICD2_MOUSE Protein bicaudal D homolog 2 OS=Mus musculus OX=10090 GN=Bicd2 PE=1 SV=1	Q921C5-2;Q921C5;Q921C5-3	Protein bicaudal D homolog 2	Bicd2	4737	3325	4365	1333	2672	2223	5511	3517	3916		7	7	9.6
	sp|O08539-2|BIN1_MOUSE Isoform 2 of Myc box-dependent-interacting protein 1 OS=Mus musculus OX=10090 GN=Bin1;sp|O08539|BIN1_MOUSE Myc box-dependent-interacting protein 1 OS=Mus musculus OX=10090 GN=Bin1 PE=1 SV=1	O08539-2;O08539	Myc box-dependent-interacting protein 1	Bin1	4053	14830	12795	12135	9940	9797	5847	10823	10874		5	5	23
	sp|D3Z6Q9|BIN2_MOUSE Bridging integrator 2 OS=Mus musculus OX=10090 GN=Bin2 PE=1 SV=1	D3Z6Q9;Q7TQF7	Bridging integrator 2	Bin2	89495	61941	96484	62970	52745	32555	59795	40218	59626		14	13	36.6
	sp|O88738-3|BIRC6_MOUSE Isoform 3 of Baculoviral IAP repeat-containing protein 6 OS=Mus musculus OX=10090 GN=Birc6;sp|O88738-2|BIRC6_MOUSE Isoform 2 of Baculoviral IAP repeat-containing protein 6 OS=Mus musculus OX=10090 GN=Birc6;sp|O88738|BIRC6_MOUSE Bacu	O88738-3;O88738-2;O88738;REV__Q5NCS9;REV__O88738	Baculoviral IAP repeat-containing protein 6	Birc6	3021	2332	2702	1505	715	1181	1013	1816	912		34	33	12.4
	sp|O88700|BLM_MOUSE Bloom syndrome protein homolog OS=Mus musculus OX=10090 GN=Blm PE=1 SV=1	O88700	Bloom syndrome protein homolog	Blm	934	995	558	824	1222	694	909	668	569		3	3	2.4
	sp|Q8R016|BLMH_MOUSE Bleomycin hydrolase OS=Mus musculus OX=10090 GN=Blmh PE=1 SV=1	Q8R016	Bleomycin hydrolase	Blmh	112446	126444	168285	118031	107983	117657	127434	74801	102915		26	26	61.3
	sp|Q9CY64|BIEA_MOUSE Biliverdin reductase A OS=Mus musculus OX=10090 GN=Blvra PE=1 SV=1	Q9CY64	Biliverdin reductase A	Blvra	67415	39247	69051	31489	20397	26503	65577	34815	64082		10	10	43.1
	sp|Q91Z96|BMP2K_MOUSE BMP-2-inducible protein kinase OS=Mus musculus OX=10090 GN=Bmp2k PE=1 SV=1;sp|Q91Z96-2|BMP2K_MOUSE Isoform 2 of BMP-2-inducible protein kinase OS=Mus musculus OX=10090 GN=Bmp2k	Q91Z96;Q91Z96-2	BMP-2-inducible protein kinase	Bmp2k	0	1003	1338	1073	1252	1191	896	1206	0		3	3	5.9
	tr|Q6PGF5|Q6PGF5_MOUSE BMS1 homolog, ribosome assembly protein (Yeast) OS=Mus musculus OX=10090 GN=Bms1 PE=1 SV=1	Q6PGF5		Bms1	5404	6418	8330	9383	5602	8648	13152	9772	7522		15	15	18.8
	sp|Q8BGS2|BOLA2_MOUSE BolA-like protein 2 OS=Mus musculus OX=10090 GN=Bola2 PE=1 SV=1;sp|Q8BGS2-2|BOLA2_MOUSE Isoform 2 of BolA-like protein 2 OS=Mus musculus OX=10090 GN=Bola2	Q8BGS2;Q8BGS2-2	BolA-like protein 2	Bola2	127565	98371	136294	148651	111934	111934	93824	98010	74327		4	4	62.8
	sp|P97452|BOP1_MOUSE Ribosome biogenesis protein BOP1 OS=Mus musculus OX=10090 GN=Bop1 PE=1 SV=1	P97452	Ribosome biogenesis protein BOP1	Bop1	33923	30689	31678	31314	21133	24510	32518	34971	22618		19	19	42.9
	sp|Q8R164|BPHL_MOUSE Valacyclovir hydrolase OS=Mus musculus OX=10090 GN=Bphl PE=1 SV=1	Q8R164	Valacyclovir hydrolase	Bphl	0	0	4723	3132	2632	9161	0	2838	2743		3	3	14.4
	sp|Q9Z0S1|BPNT1_MOUSE 3(2),5-bisphosphate nucleotidase 1 OS=Mus musculus OX=10090 GN=Bpnt1 PE=1 SV=2	Q9Z0S1	3(2),5-bisphosphate nucleotidase 1	Bpnt1	3354	8207	11375	9999	8624	13137	17785	7502	11653		6	6	24.4
	tr|E9Q6A7|E9Q6A7_MOUSE Bromodomain PHD finger transcription factor OS=Mus musculus OX=10090 GN=Bptf PE=1 SV=1;tr|A2A655|A2A655_MOUSE Bromodomain PHD finger transcription factor OS=Mus musculus OX=10090 GN=Bptf PE=1 SV=1;tr|A2A654|A2A654_MOUSE Bromodomain P	E9Q6A7;A2A655;A2A654;A2A652;A2A653		Bptf	1170	206	181	940	1223	1351	628	804	804		6	6	3.1
	sp|P46737|BRCC3_MOUSE Lys-63-specific deubiquitinase BRCC36 OS=Mus musculus OX=10090 GN=Brcc3 PE=1 SV=1;sp|P46737-2|BRCC3_MOUSE Isoform 2 of Lys-63-specific deubiquitinase BRCC36 OS=Mus musculus OX=10090 GN=Brcc3	P46737;P46737-2	Lys-63-specific deubiquitinase BRCC36	Brcc3	4776	2206	15275	8676	2023	6810	7998	8673	6382		4	4	15.1
	sp|Q7JJ13|BRD2_MOUSE Bromodomain-containing protein 2 OS=Mus musculus OX=10090 GN=Brd2 PE=1 SV=1;sp|Q7JJ13-2|BRD2_MOUSE Isoform 2 of Bromodomain-containing protein 2 OS=Mus musculus OX=10090 GN=Brd2	Q7JJ13;Q7JJ13-2	Bromodomain-containing protein 2	Brd2	3625	3382	7899	10616	7578	8406	9221	7957	9823		8	8	15.8
	sp|Q9ESU6|BRD4_MOUSE Bromodomain-containing protein 4 OS=Mus musculus OX=10090 GN=Brd4 PE=1 SV=2;sp|Q9ESU6-2|BRD4_MOUSE Isoform 2 of Bromodomain-containing protein 4 OS=Mus musculus OX=10090 GN=Brd4	Q9ESU6;Q9ESU6-2;Q91Y44	Bromodomain-containing protein 4	Brd4	16627	9164	12179	13563	17186	13080	17271	14377	12892		19	14	16.2
	sp|Q8K3W0|BABA2_MOUSE BRISC and BRCA1-A complex member 2 OS=Mus musculus OX=10090 GN=Babam2 PE=1 SV=2;sp|Q8K3W0-1|BABA2_MOUSE Isoform 1 of BRISC and BRCA1-A complex member 2 OS=Mus musculus OX=10090 GN=Babam2	Q8K3W0;Q8K3W0-1;Q8K3W0-4;Q8K3W0-6;Q8K3W0-5	BRCA1-A complex subunit BRE	Bre	1256	4119	10989	3529	7039	5111	7670	4169	9131		5	5	23.2
	sp|Q8BXV2|BRI3B_MOUSE BRI3-binding protein OS=Mus musculus OX=10090 GN=Bri3bp PE=1 SV=1	Q8BXV2	BRI3-binding protein	Bri3bp	44597	32848	50649	26319	30234	17375	6060	33209	28658		5	5	19.8
	sp|Q9DCA5|BRX1_MOUSE Ribosome biogenesis protein BRX1 homolog OS=Mus musculus OX=10090 GN=Brix1 PE=1 SV=3	Q9DCA5	Ribosome biogenesis protein BRX1 homolog	Brix1	113542	118367	136339	122154	80475	49599	119631	64385	113052		12	12	50.1
	sp|Q8K2Q7|BROX_MOUSE BRO1 domain-containing protein BROX OS=Mus musculus OX=10090 GN=Brox PE=1 SV=1	Q8K2Q7;Q8K2Q7-2	BRO1 domain-containing protein BROX	Brox	1713	1978	1243	0	34427	1422	39793	3309	2853		7	7	24.1
	sp|P18572-2|BASI_MOUSE Isoform 2 of Basigin OS=Mus musculus OX=10090 GN=Bsg;sp|P18572|BASI_MOUSE Basigin OS=Mus musculus OX=10090 GN=Bsg PE=1 SV=2	P18572-2;P18572	Basigin	Bsg	160568	148752	139605	81162	105210	116841	109414	114244	87971		7	7	26.7
	tr|E9QAE3|E9QAE3_MOUSE B-TFIID TATA-box-binding protein-associated factor 1 OS=Mus musculus OX=10090 GN=Btaf1 PE=1 SV=1	E9QAE3		Btaf1	2461	1677	2208	1030	869	1126	3004	1539	2111		10	10	9.3
	sp|Q64152-2|BTF3_MOUSE Isoform 2 of Transcription factor BTF3 OS=Mus musculus OX=10090 GN=Btf3;sp|Q64152|BTF3_MOUSE Transcription factor BTF3 OS=Mus musculus OX=10090 GN=Btf3 PE=1 SV=3	Q64152-2;Q64152	Transcription factor BTF3	Btf3	735998	718233	779540	322397	388146	348576	348379	449531	297609		10	10	74.1
	sp|Q9CQH7|BT3L4_MOUSE Transcription factor BTF3 homolog 4 OS=Mus musculus OX=10090 GN=Btf3l4 PE=1 SV=1	Q9CQH7	Transcription factor BTF3 homolog 4	Btf3l4	21756	17786	14809	20997	14372	16629	25091	25227	25774		3	3	41.1
	sp|Q9WVA3|BUB3_MOUSE Mitotic checkpoint protein BUB3 OS=Mus musculus OX=10090 GN=Bub3 PE=1 SV=2	Q9WVA3	Mitotic checkpoint protein BUB3	Bub3	220982	220057	255160	187165	151603	159220	227110	200397	232175		12	12	57.1
	sp|Q6PGH1|BUD31_MOUSE Protein BUD31 homolog OS=Mus musculus OX=10090 GN=Bud31 PE=1 SV=2	Q6PGH1;Q6PGH1-2	Protein BUD31 homolog	Bud31	70892	98258	89983	61624	57396	66432	104939	69934	54309		8	8	47.2
	sp|O54825|BYST_MOUSE Bystin OS=Mus musculus OX=10090 GN=Bysl PE=1 SV=3	O54825	Bystin	Bysl	8022	17837	42649	27461	17626	9308	27263	37776	21580		10	10	27.1
	sp|Q9CQC6|BZW1_MOUSE Basic leucine zipper and W2 domain-containing protein 1 OS=Mus musculus OX=10090 GN=Bzw1 PE=1 SV=1	Q9CQC6	Basic leucine zipper and W2 domain-containing protein 1	Bzw1	194340	157085	170131	171442	109805	159902	192440	151760	114211		16	15	28.2
	sp|Q91VK1|BZW2_MOUSE Basic leucine zipper and W2 domain-containing protein 2 OS=Mus musculus OX=10090 GN=Bzw2 PE=1 SV=1	Q91VK1	Basic leucine zipper and W2 domain-containing protein 2	Bzw2	59543	75500	105629	55152	45154	55152	65125	44358	80005		14	14	39.6
	sp|Q9JJ06|C1GLT_MOUSE Glycoprotein-N-acetylgalactosamine 3-beta-galactosyltransferase 1 OS=Mus musculus OX=10090 GN=C1galt1 PE=1 SV=1	Q9JJ06	Glycoprotein-N-acetylgalactosamine 3-beta-galactosyltransferase 1	C1galt1	0	2077	6681	5904	1158	0	2667	0	1883		3	3	10.5
	sp|O35658|C1QBP_MOUSE Complement component 1 Q subcomponent-binding protein, mitochondrial OS=Mus musculus OX=10090 GN=C1qbp PE=1 SV=1	O35658	Complement component 1 Q subcomponent-binding protein, mitochondrial	C1qbp	213622	200850	262084	67458	160278	175121	216157	199427	173760		5	5	24.8
	sp|Q06138|CAB39_MOUSE Calcium-binding protein 39 OS=Mus musculus OX=10090 GN=Cab39 PE=1 SV=2	Q06138;Q9DB16-2;Q9DB16	Calcium-binding protein 39	Cab39	100772	119373	183674	79516	99639	85985	155109	100723	121397		16	16	45.2
	sp|Q9CS00|CATIN_MOUSE Cactin OS=Mus musculus OX=10090 GN=Cactin PE=1 SV=2	Q9CS00	Cactin	Cactin	24362	20664	8529	5077	2608	2185	23903	4193	26836		8	8	11.7
	sp|Q9CXW3|CYBP_MOUSE Calcyclin-binding protein OS=Mus musculus OX=10090 GN=Cacybp PE=1 SV=1	Q9CXW3	Calcyclin-binding protein	Cacybp	429250	483562	501786	367505	325244	339800	457779	312424	453087		15	15	61.1
	sp|B2RQC6|PYR1_MOUSE CAD protein OS=Mus musculus OX=10090 GN=Cad PE=1 SV=1;sp|B2RQC6-2|PYR1_MOUSE Isoform 2 of CAD protein OS=Mus musculus OX=10090 GN=Cad	B2RQC6;B2RQC6-2;Q8C196	CAD protein;Glutamine-dependent carbamoyl-phosphate synthase;Aspartate carbamoyltransferase;Dihydroorotase	Cad	120728	103527	129541	115095	101691	107709	125181	89583	96653		81	81	55.3
	sp|P14211|CALR_MOUSE Calreticulin OS=Mus musculus OX=10090 GN=Calr PE=1 SV=1	P14211	Calreticulin	Calr	1374660	1426510	1719250	1161070	1248290	1039730	1124390	1007150	965945		28	28	68.3
	sp|O35887|CALU_MOUSE Calumenin OS=Mus musculus OX=10090 GN=Calu PE=1 SV=1	O35887	Calumenin	Calu	23861	64392	45862	52128	28481	16642	43065	34555	50427		12	12	53.7
	sp|Q6PHZ2-2|KCC2D_MOUSE Isoform 2 of Calcium/calmodulin-dependent protein kinase type II subunit delta OS=Mus musculus OX=10090 GN=Camk2d;sp|Q6PHZ2-4|KCC2D_MOUSE Isoform 3 of Calcium/calmodulin-dependent protein kinase type II subunit delta OS=Mus musculus	Q6PHZ2-2;Q6PHZ2-4;Q6PHZ2;Q6PHZ2-5	Calcium/calmodulin-dependent protein kinase type II subunit delta	Camk2d	3439	11463	7929	12214	10297	21095	0	14671	0		8	5	24.3
	sp|Q923T9-3|KCC2G_MOUSE Isoform 3 of Calcium/calmodulin-dependent protein kinase type II subunit gamma OS=Mus musculus OX=10090 GN=Camk2g;sp|Q923T9-2|KCC2G_MOUSE Isoform 2 of Calcium/calmodulin-dependent protein kinase type II subunit gamma OS=Mus musculus	Q923T9-3;Q923T9-2;Q923T9;P28652;P11798	Calcium/calmodulin-dependent protein kinase type II subunit gamma;Calcium/calmodulin-dependent protein kinase type II subunit beta	Camk2g;Camk2b	2745	2265	7125	3917	2068	4873	8002	3091	5456		4	4	17.2
	sp|P08414|KCC4_MOUSE Calcium/calmodulin-dependent protein kinase type IV OS=Mus musculus OX=10090 GN=Camk4 PE=1 SV=2	P08414;P58801	Calcium/calmodulin-dependent protein kinase type IV	Camk4	15789	22385	6153	10604	19144	18919	42422	17692	8220		9	9	25.8
	sp|Q6ZQ38|CAND1_MOUSE Cullin-associated NEDD8-dissociated protein 1 OS=Mus musculus OX=10090 GN=Cand1 PE=1 SV=2	Q6ZQ38	Cullin-associated NEDD8-dissociated protein 1	Cand1	109408	95050	104422	84727	81602	93858	111470	87143	102189		41	40	42.1
	sp|Q6ZQ73|CAND2_MOUSE Cullin-associated NEDD8-dissociated protein 2 OS=Mus musculus OX=10090 GN=Cand2 PE=1 SV=2	Q6ZQ73	Cullin-associated NEDD8-dissociated protein 2	Cand2	0	596	662	251	493	0	0	0	408		3	3	4
	sp|P35564|CALX_MOUSE Calnexin OS=Mus musculus OX=10090 GN=Canx PE=1 SV=1	P35564	Calnexin	Canx	763592	631316	731924	632681	632578	548056	649770	592137	511304		29	29	42.1
	sp|P40124|CAP1_MOUSE Adenylyl cyclase-associated protein 1 OS=Mus musculus OX=10090 GN=Cap1 PE=1 SV=4	P40124;Q9CYT6	Adenylyl cyclase-associated protein 1	Cap1	744550	680508	773436	747808	744656	800403	924504	714786	775683		32	32	77
	sp|P24452|CAPG_MOUSE Macrophage-capping protein OS=Mus musculus OX=10090 GN=Capg PE=1 SV=2	P24452	Macrophage-capping protein	Capg	107458	117746	123871	125006	99701	102444	122005	87930	69671		13	13	45.5
	sp|O35350|CAN1_MOUSE Calpain-1 catalytic subunit OS=Mus musculus OX=10090 GN=Capn1 PE=1 SV=1	O35350	Calpain-1 catalytic subunit	Capn1	78596	52208	53734	55955	59780	52866	71001	37179	58368		28	28	48.7
	sp|O08529|CAN2_MOUSE Calpain-2 catalytic subunit OS=Mus musculus OX=10090 GN=Capn2 PE=1 SV=4	O08529	Calpain-2 catalytic subunit	Capn2	175977	161573	198083	146042	125575	137215	149542	132134	142139		31	31	57.7
	sp|O88456|CPNS1_MOUSE Calpain small subunit 1 OS=Mus musculus OX=10090 GN=Capns1 PE=1 SV=1	O88456;Q9D7J7	Calpain small subunit 1	Capns1	137673	112526	121915	119720	104047	54444	147929	123799	93694		11	11	50.9
	sp|Q60865|CAPR1_MOUSE Caprin-1 OS=Mus musculus OX=10090 GN=Caprin1 PE=1 SV=2	Q60865	Caprin-1	Caprin1	92214	69340	133818	76083	66777	67437	93936	75842	83575		14	14	28
	sp|P47753|CAZA1_MOUSE F-actin-capping protein subunit alpha-1 OS=Mus musculus OX=10090 GN=Capza1 PE=1 SV=4	P47753	F-actin-capping protein subunit alpha-1	Capza1	328080	349404	469427	310926	307715	260553	321348	238911	251162		10	10	71.3
	sp|P47754|CAZA2_MOUSE F-actin-capping protein subunit alpha-2 OS=Mus musculus OX=10090 GN=Capza2 PE=1 SV=3	P47754	F-actin-capping protein subunit alpha-2	Capza2	369836	393218	473969	336676	275821	279410	370436	181039	257840		14	11	76.9
	sp|P47757-2|CAPZB_MOUSE Isoform 2 of F-actin-capping protein subunit beta OS=Mus musculus OX=10090 GN=Capzb;sp|P47757-4|CAPZB_MOUSE Isoform 3 of F-actin-capping protein subunit beta OS=Mus musculus OX=10090 GN=Capzb;sp|P47757|CAPZB_MOUSE F-actin-capping pr	P47757-2;P47757-4;P47757	F-actin-capping protein subunit beta	Capzb	1005980	1129200	1297000	873792	739969	717376	925043	603396	875653		18	18	61.8
	sp|Q8CIS0-2|CAR11_MOUSE Isoform 2 of Caspase recruitment domain-containing protein 11 OS=Mus musculus OX=10090 GN=Card11;sp|Q8CIS0|CAR11_MOUSE Caspase recruitment domain-containing protein 11 OS=Mus musculus OX=10090 GN=Card11 PE=1 SV=2	Q8CIS0-2;Q8CIS0	Caspase recruitment domain-containing protein 11	Card11	1970	637	3968	657	2170	881	1335	1238	0		7	7	7.5
	sp|Q9CR86|CHSP1_MOUSE Calcium-regulated heat stable protein 1 OS=Mus musculus OX=10090 GN=Carhsp1 PE=1 SV=1	Q9CR86	Calcium-regulated heat stable protein 1	Carhsp1	0	19403	22088	9678	0	9900	0	0	0		3	3	39.9
	sp|Q9CZ42|NNRD_MOUSE ATP-dependent (S)-NAD(P)H-hydrate dehydratase OS=Mus musculus OX=10090 GN=Naxd PE=1 SV=1;sp|Q9CZ42-3|NNRD_MOUSE Isoform 3 of ATP-dependent (S)-NAD(P)H-hydrate dehydratase OS=Mus musculus OX=10090 GN=Naxd;sp|Q9CZ42-2|NNRD_MOUSE Isoform	Q9CZ42;Q9CZ42-3;Q9CZ42-2	ATP-dependent (S)-NAD(P)H-hydrate dehydratase	Carkd	12931	6052	10228	13590	1588	7682	9144	7314	5197		6	6	26.5
	sp|Q9WVG6-2|CARM1_MOUSE Isoform 2 of Histone-arginine methyltransferase CARM1 OS=Mus musculus OX=10090 GN=Carm1;sp|Q9WVG6|CARM1_MOUSE Histone-arginine methyltransferase CARM1 OS=Mus musculus OX=10090 GN=Carm1 PE=1 SV=2	Q9WVG6-2;Q9WVG6	Histone-arginine methyltransferase CARM1	Carm1	11794	4297	4873	5208	1358	3144	7751	4406	4613		10	10	28.9
	sp|Q9ER72-2|SYCC_MOUSE Isoform 2 of Cysteine--tRNA ligase, cytoplasmic OS=Mus musculus OX=10090 GN=Cars;sp|Q9ER72|SYCC_MOUSE Cysteine--tRNA ligase, cytoplasmic OS=Mus musculus OX=10090 GN=Cars PE=1 SV=2	Q9ER72-2;Q9ER72	Cysteine--tRNA ligase, cytoplasmic	Cars	29370	17780	33467	10056	3844	13418	18159	13482	4181		19	19	32.2
	sp|P29452|CASP1_MOUSE Caspase-1 OS=Mus musculus OX=10090 GN=Casp1 PE=1 SV=1	P29452	Caspase-1;Caspase-1 subunit p20;Caspase-1 subunit p10	Casp1	83602	78481	115104	81799	39574	61488	93134	50641	73950		18	18	55
	sp|P70677|CASP3_MOUSE Caspase-3 OS=Mus musculus OX=10090 GN=Casp3 PE=1 SV=1	P70677	Caspase-3;Caspase-3 subunit p17;Caspase-3 subunit p12	Casp3	109506	82218	94509	117209	97490	118848	164184	107704	106221		13	13	52
	sp|O08738|CASP6_MOUSE Caspase-6 OS=Mus musculus OX=10090 GN=Casp6 PE=1 SV=1	O08738	Caspase-6;Caspase-6 subunit p18;Caspase-6 subunit p11	Casp6	0	2686	6820	0	0	0	0	2233	2053		3	3	14.5
	sp|O89110|CASP8_MOUSE Caspase-8 OS=Mus musculus OX=10090 GN=Casp8 PE=1 SV=1	O89110	Caspase-8;Caspase-8 subunit p18;Caspase-8 subunit p10	Casp8	72281	107371	135489	89744	64270	89922	112080	86336	106277		23	23	60.6
	sp|P51125-3|ICAL_MOUSE Isoform 3 of Calpastatin OS=Mus musculus OX=10090 GN=Cast;sp|P51125-2|ICAL_MOUSE Isoform 2 of Calpastatin OS=Mus musculus OX=10090 GN=Cast;sp|P51125-6|ICAL_MOUSE Isoform 6 of Calpastatin OS=Mus musculus OX=10090 GN=Cast;sp|P51125|ICA	P51125-3;P51125-2;P51125-6;P51125;P51125-7;P51125-5;P51125-4	Calpastatin	Cast	22469	14316	26237	17798	12415	9830	9179	5355	9396		11	11	27.7
	sp|P24270|CATA_MOUSE Catalase OS=Mus musculus OX=10090 GN=Cat PE=1 SV=4	P24270	Catalase	Cat	106662	80708	97409	83360	97024	68422	82884	68400	60132		22	22	52.8
	sp|Q08024-2|PEBB_MOUSE Isoform 2 of Core-binding factor subunit beta OS=Mus musculus OX=10090 GN=Cbfb	Q08024-2	Core-binding factor subunit beta	Cbfb	0	0	19338	0	20727	20798	30792	15827	0		1	1	46.2
	sp|Q08024|PEBB_MOUSE Core-binding factor subunit beta OS=Mus musculus OX=10090 GN=Cbfb PE=1 SV=1;sp|Q08024-4|PEBB_MOUSE Isoform 4 of Core-binding factor subunit beta OS=Mus musculus OX=10090 GN=Cbfb;sp|Q08024-3|PEBB_MOUSE Isoform 3 of Core-binding factor s	Q08024;Q08024-4;Q08024-3	Core-binding factor subunit beta	Cbfb	25858	65611	81710	15982	29998	14433	52649	7219	53639		9	1	49.2
	sp|P22682|CBL_MOUSE E3 ubiquitin-protein ligase CBL OS=Mus musculus OX=10090 GN=Cbl PE=1 SV=3	P22682	E3 ubiquitin-protein ligase CBL	Cbl	18273	16841	26720	22158	23107	25517	27476	10852	23522		18	18	35.2
	sp|Q3TTA7|CBLB_MOUSE E3 ubiquitin-protein ligase CBL-B OS=Mus musculus OX=10090 GN=Cblb PE=1 SV=3;sp|Q3TTA7-2|CBLB_MOUSE Isoform 2 of E3 ubiquitin-protein ligase CBL-B OS=Mus musculus OX=10090 GN=Cblb	Q3TTA7;Q3TTA7-2	E3 ubiquitin-protein ligase CBL-B	Cblb	1491	932	1585	0	871	1332	873	1012	0		4	4	6
	sp|P48758|CBR1_MOUSE Carbonyl reductase [NADPH] 1 OS=Mus musculus OX=10090 GN=Cbr1 PE=1 SV=3	P48758;Q8K354	Carbonyl reductase [NADPH] 1	Cbr1	41713	25914	22496	29365	23603	37004	28059	26789	29391		9	9	44
	sp|P83917|CBX1_MOUSE Chromobox protein homolog 1 OS=Mus musculus OX=10090 GN=Cbx1 PE=1 SV=1	P83917	Chromobox protein homolog 1	Cbx1	48481	26343	39169	41739	40512	37440	41461	41908	42842		5	5	34.6
	sp|P23198|CBX3_MOUSE Chromobox protein homolog 3 OS=Mus musculus OX=10090 GN=Cbx3 PE=1 SV=2	P23198	Chromobox protein homolog 3	Cbx3	670202	838512	1065160	769842	917318	745533	652369	619887	634767		11	9	53
	sp|Q61686|CBX5_MOUSE Chromobox protein homolog 5 OS=Mus musculus OX=10090 GN=Cbx5 PE=1 SV=1	Q61686	Chromobox protein homolog 5	Cbx5	168372	216683	235773	300675	223054	244545	340573	285041	264887		8	8	51.8
	sp|Q8BRN9|C2D1B_MOUSE Coiled-coil and C2 domain-containing protein 1B OS=Mus musculus OX=10090 GN=Cc2d1b PE=1 SV=1	Q8BRN9	Coiled-coil and C2 domain-containing protein 1B	Cc2d1b	11283	8932	11195	10666	10179	14472	14564	13064	8691		12	12	20.5
	sp|Q8CH18|CCAR1_MOUSE Cell division cycle and apoptosis regulator protein 1 OS=Mus musculus OX=10090 GN=Ccar1 PE=1 SV=1;sp|Q8CH18-3|CCAR1_MOUSE Isoform 3 of Cell division cycle and apoptosis regulator protein 1 OS=Mus musculus OX=10090 GN=Ccar1	Q8CH18;Q8CH18-3;Q8CH18-2	Cell division cycle and apoptosis regulator protein 1	Ccar1	23645	10509	17655	25489	12363	17967	15814	21390	23262		20	20	19.9
	sp|Q8VDP4|CCAR2_MOUSE Cell cycle and apoptosis regulator protein 2 OS=Mus musculus OX=10090 GN=Ccar2 PE=1 SV=2	Q8VDP4	Cell cycle and apoptosis regulator protein 2	Ccar2	38354	28636	25571	53817	51364	30721	45014	35703	42032		30	30	44.1
	sp|Q8R344|CCD12_MOUSE Coiled-coil domain-containing protein 12 OS=Mus musculus OX=10090 GN=Ccdc12 PE=1 SV=2	Q8R344	Coiled-coil domain-containing protein 12	Ccdc12	24357	44409	68016	40290	42025	37097	21782	22557	50197		3	3	29.5
	sp|Q9D8X2|CC124_MOUSE Coiled-coil domain-containing protein 124 OS=Mus musculus OX=10090 GN=Ccdc124 PE=1 SV=1	Q9D8X2	Coiled-coil domain-containing protein 124	Ccdc124	8698	35002	51555	19415	24259	34474	7257	28398	39530		4	4	20.7
	sp|Q8CDI6-2|CD158_MOUSE Isoform 2 of Coiled-coil domain-containing protein 158 OS=Mus musculus OX=10090 GN=Ccdc158;sp|Q8CDI6|CD158_MOUSE Coiled-coil domain-containing protein 158 OS=Mus musculus OX=10090 GN=Ccdc158 PE=2 SV=1	Q8CDI6-2;Q8CDI6	Coiled-coil domain-containing protein 158	Ccdc158	48623	51689	55363	42283	24986	32562	36598	0	55786		1	1	2.3
	sp|Q78PG9|CCD25_MOUSE Coiled-coil domain-containing protein 25 OS=Mus musculus OX=10090 GN=Ccdc25 PE=1 SV=1	Q78PG9	Coiled-coil domain-containing protein 25	Ccdc25	36021	54769	68532	18932	28099	7370	23884	14580	21878		8	8	42.8
	sp|Q9D024|CCD47_MOUSE Coiled-coil domain-containing protein 47 OS=Mus musculus OX=10090 GN=Ccdc47 PE=1 SV=2;sp|Q9D024-2|CCD47_MOUSE Isoform 2 of Coiled-coil domain-containing protein 47 OS=Mus musculus OX=10090 GN=Ccdc47;sp|Q9D024-3|CCD47_MOUSE Isoform 3 o	Q9D024;Q9D024-2;Q9D024-3	Coiled-coil domain-containing protein 47	Ccdc47	29641	27061	29000	30217	25527	22776	36798	23954	27463		12	12	30.6
	sp|Q8R3Q6|CCD58_MOUSE Coiled-coil domain-containing protein 58 OS=Mus musculus OX=10090 GN=Ccdc58 PE=1 SV=1	Q8R3Q6	Coiled-coil domain-containing protein 58	Ccdc58	24565	13581	18174	7905	9753	36157	12175	21361	12119		3	3	21.5
	sp|Q9JJ89|CCD86_MOUSE Coiled-coil domain-containing protein 86 OS=Mus musculus OX=10090 GN=Ccdc86 PE=1 SV=2	Q9JJ89	Coiled-coil domain-containing protein 86	Ccdc86	14284	16227	9166	10585	0	3792	9118	10461	5632		4	4	10.3
	sp|Q4QRL3|CC88B_MOUSE Coiled-coil domain-containing protein 88B OS=Mus musculus OX=10090 GN=Ccdc88b PE=1 SV=2;sp|Q4QRL3-2|CC88B_MOUSE Isoform 2 of Coiled-coil domain-containing protein 88B OS=Mus musculus OX=10090 GN=Ccdc88b	Q4QRL3;Q4QRL3-2	Coiled-coil domain-containing protein 88B	Ccdc88b	9562	6101	28439	12050	12260	16130	17879	9993	12430		32	32	28.2
	sp|P51943|CCNA2_MOUSE Cyclin-A2 OS=Mus musculus OX=10090 GN=Ccna2 PE=1 SV=2	P51943	Cyclin-A2	Ccna2	2213	2429	2575	3039	3159	2417	2441	2789	2321		4	4	12.8
	sp|P24860|CCNB1_MOUSE G2/mitotic-specific cyclin-B1 OS=Mus musculus OX=10090 GN=Ccnb1 PE=1 SV=3	P24860	G2/mitotic-specific cyclin-B1	Ccnb1	5316	5257	2387	6861	7810	3064	2984	2771	1950		6	6	24
	sp|Q61458|CCNH_MOUSE Cyclin-H OS=Mus musculus OX=10090 GN=Ccnh PE=1 SV=2	Q61458	Cyclin-H	Ccnh	12670	10188	15662	7439	4730	6497	6267	10165	4226		4	4	17.3
	sp|O88874|CCNK_MOUSE Cyclin-K OS=Mus musculus OX=10090 GN=Ccnk PE=1 SV=3	O88874	Cyclin-K	Ccnk	11692	4339	10078	10330	3650	5939	11557	6874	3207		4	4	12.8
	sp|Q9JJA7-3|CCNL2_MOUSE Isoform 3 of Cyclin-L2 OS=Mus musculus OX=10090 GN=Ccnl2;sp|Q9JJA7-2|CCNL2_MOUSE Isoform 2 of Cyclin-L2 OS=Mus musculus OX=10090 GN=Ccnl2;sp|Q9JJA7|CCNL2_MOUSE Cyclin-L2 OS=Mus musculus OX=10090 GN=Ccnl2 PE=1 SV=1;sp|Q52KE7-2|CCNL1_	Q9JJA7-3;Q9JJA7-2;Q9JJA7;Q52KE7-2;Q52KE7	Cyclin-L2;Cyclin-L1	Ccnl2;Ccnl1	4554	0	7397	6699	3141	3137	4978	6000	3837		2	2	11
	sp|P51682|CCR5_MOUSE C-C chemokine receptor type 5 OS=Mus musculus OX=10090 GN=Ccr5 PE=2 SV=3	P51682	C-C chemokine receptor type 5	Ccr5	0	5118	12121	3652	0	12361	13863	10812	3488		3	3	14.7
	sp|Q9WU84|CCS_MOUSE Copper chaperone for superoxide dismutase OS=Mus musculus OX=10090 GN=Ccs PE=1 SV=1	Q9WU84	Copper chaperone for superoxide dismutase	Ccs	0	7974	0	0	5594	5979	8834	4375	0		3	3	13.9
	sp|P80314|TCPB_MOUSE T-complex protein 1 subunit beta OS=Mus musculus OX=10090 GN=Cct2 PE=1 SV=4	P80314	T-complex protein 1 subunit beta	Cct2	870289	674285	1047420	719224	582078	694293	1029170	707334	841176		39	39	80.4
	sp|P80318|TCPG_MOUSE T-complex protein 1 subunit gamma OS=Mus musculus OX=10090 GN=Cct3 PE=1 SV=1	P80318	T-complex protein 1 subunit gamma	Cct3	829834	798688	1018550	814982	692286	742888	867845	729994	712307		31	31	66.2
	sp|P80315|TCPD_MOUSE T-complex protein 1 subunit delta OS=Mus musculus OX=10090 GN=Cct4 PE=1 SV=3	P80315	T-complex protein 1 subunit delta	Cct4	634596	617480	828915	666553	538558	521385	759768	510375	669271		32	32	68.8
	sp|P80316|TCPE_MOUSE T-complex protein 1 subunit epsilon OS=Mus musculus OX=10090 GN=Cct5 PE=1 SV=1	P80316	T-complex protein 1 subunit epsilon	Cct5	681041	577085	649281	477562	486366	496811	630505	450081	572871		35	35	71.5
	sp|P80317|TCPZ_MOUSE T-complex protein 1 subunit zeta OS=Mus musculus OX=10090 GN=Cct6a PE=1 SV=3	P80317	T-complex protein 1 subunit zeta	Cct6a	837140	744850	889529	708560	585985	563208	830743	558733	700623		28	23	59.9
	sp|Q61390|TCPW_MOUSE T-complex protein 1 subunit zeta-2 OS=Mus musculus OX=10090 GN=Cct6b PE=1 SV=4	Q61390	T-complex protein 1 subunit zeta-2	Cct6b	37975	52342	61465	7523	0	0	4980	0	6754		2	2	13.7
	sp|P80313|TCPH_MOUSE T-complex protein 1 subunit eta OS=Mus musculus OX=10090 GN=Cct7 PE=1 SV=1	P80313	T-complex protein 1 subunit eta	Cct7	587536	452826	521031	441821	453683	429369	610409	440351	349520		27	27	60.7
	sp|P42932|TCPQ_MOUSE T-complex protein 1 subunit theta OS=Mus musculus OX=10090 GN=Cct8 PE=1 SV=3	P42932	T-complex protein 1 subunit theta	Cct8	955927	783186	994812	748151	627410	688911	990558	626795	679959		37	37	74.1
	sp|Q8C1Y8|CCZ1_MOUSE Vacuolar fusion protein CCZ1 homolog OS=Mus musculus OX=10090 GN=Ccz1 PE=1 SV=1	Q8C1Y8	Vacuolar fusion protein CCZ1 homolog	Ccz1	2989	5667	1993	885	3071	4283	5677	2046	0		7	7	18.1
	sp|P08920|CD2_MOUSE T-cell surface antigen CD2 OS=Mus musculus OX=10090 GN=Cd2 PE=1 SV=1	P08920	T-cell surface antigen CD2	Cd2	43103	39693	44964	41972	38291	34524	22719	22121	33754		7	7	28.5
	sp|P24161|CD3Z_MOUSE T-cell surface glycoprotein CD3 zeta chain OS=Mus musculus OX=10090 GN=Cd247 PE=1 SV=1;sp|P24161-2|CD3Z_MOUSE Isoform CD-3-eta of T-cell surface glycoprotein CD3 zeta chain OS=Mus musculus OX=10090 GN=Cd247	P24161;P24161-2	T-cell surface glycoprotein CD3 zeta chain	Cd247	24352	73167	42091	10996	20550	50946	32689	18102	26011		7	7	50
	sp|Q9JLQ0|CD2AP_MOUSE CD2-associated protein OS=Mus musculus OX=10090 GN=Cd2ap PE=1 SV=3	Q9JLQ0	CD2-associated protein	Cd2ap	2386	748	2568	2332	1767	974	1730	0	1117		3	3	4.6
	sp|Q9CWK3|CD2B2_MOUSE CD2 antigen cytoplasmic tail-binding protein 2 OS=Mus musculus OX=10090 GN=Cd2bp2 PE=1 SV=1	Q9CWK3	CD2 antigen cytoplasmic tail-binding protein 2	Cd2bp2	7316	7735	0	2785	4770	9724	12753	0	5051		5	5	18.1
	sp|P04235|CD3D_MOUSE T-cell surface glycoprotein CD3 delta chain OS=Mus musculus OX=10090 GN=Cd3d PE=1 SV=1	P04235	T-cell surface glycoprotein CD3 delta chain	Cd3d	30101	60579	84170	65795	44042	50250	33328	35722	28373		3	3	19.7
	sp|P22646|CD3E_MOUSE T-cell surface glycoprotein CD3 epsilon chain OS=Mus musculus OX=10090 GN=Cd3e PE=1 SV=2	P22646	T-cell surface glycoprotein CD3 epsilon chain	Cd3e	134094	137202	166172	114804	170612	139881	92116	69745	111483		4	4	29.1
	sp|Q76KJ5|RPA34_MOUSE DNA-directed RNA polymerase I subunit RPA34 OS=Mus musculus OX=10090 GN=Cd3eap PE=1 SV=2	Q76KJ5	DNA-directed RNA polymerase I subunit RPA34	Cd3eap	5664	10771	5472	6518	5658	2662	4652	4116	3065		3	3	17.8
	sp|P11942|CD3G_MOUSE T-cell surface glycoprotein CD3 gamma chain OS=Mus musculus OX=10090 GN=Cd3g PE=1 SV=1	P11942	T-cell surface glycoprotein CD3 gamma chain	Cd3g	148291	114491	117745	82246	93611	101831	105773	110346	33455		7	7	41.2
	sp|P15379-2|CD44_MOUSE Isoform 13 of CD44 antigen OS=Mus musculus OX=10090 GN=Cd44;sp|P15379-3|CD44_MOUSE Isoform 12 of CD44 antigen OS=Mus musculus OX=10090 GN=Cd44;sp|P15379-6|CD44_MOUSE Isoform 7 of CD44 antigen OS=Mus musculus OX=10090 GN=Cd44;sp|P1537	P15379-2;P15379-3;P15379-6;P15379-11;P15379-5;P15379-10;P15379-9;P15379-4;P15379-8;P15379-7;P15379;P15379-12;P15379-13	CD44 antigen	Cd44	0	0	0	8468	5685	0	38766	5616	22752		4	4	12.4
	sp|Q61735|CD47_MOUSE Leukocyte surface antigen CD47 OS=Mus musculus OX=10090 GN=Cd47 PE=1 SV=2	Q61735	Leukocyte surface antigen CD47	Cd47	0	20549	22357	19452	17743	20756	22679	19385	16731		1	1	17.8
	sp|Q61735-2|CD47_MOUSE Isoform 2 of Leukocyte surface antigen CD47 OS=Mus musculus OX=10090 GN=Cd47	Q61735-2	Leukocyte surface antigen CD47	Cd47	74499	84496	56071	56750	49012	59127	96520	70368	60761		6	2	21.9
	sp|P18181|CD48_MOUSE CD48 antigen OS=Mus musculus OX=10090 GN=Cd48 PE=1 SV=1	P18181	CD48 antigen	Cd48	173863	331588	361413	219534	200551	191298	166882	127380	194668		11	11	39.6
	sp|P13379|CD5_MOUSE T-cell surface glycoprotein CD5 OS=Mus musculus OX=10090 GN=Cd5 PE=1 SV=1	P13379	T-cell surface glycoprotein CD5	Cd5	7813	3605	10156	11137	8640	3287	11298	5428	7652		8	8	22.5
	sp|P01731|CD8A_MOUSE T-cell surface glycoprotein CD8 alpha chain OS=Mus musculus OX=10090 GN=Cd8a PE=1 SV=1	P01731	T-cell surface glycoprotein CD8 alpha chain	Cd8a	52111	66898	42137	58106	30561	28530	63659	33770	45399		3	3	12.6
	sp|P10300|CD8B_MOUSE T-cell surface glycoprotein CD8 beta chain OS=Mus musculus OX=10090 GN=Cd8b PE=1 SV=1	P10300	T-cell surface glycoprotein CD8 beta chain	Cd8b	41905	56684	44265	40647	29168	34246	29541	33634	33069		5	5	24.4
	sp|Q9Z0M6|CD97_MOUSE CD97 antigen OS=Mus musculus OX=10090 GN=Cd97 PE=1 SV=2;sp|Q9Z0M6-3|CD97_MOUSE Isoform 3 of CD97 antigen OS=Mus musculus OX=10090 GN=Cd97;sp|Q9Z0M6-2|CD97_MOUSE Isoform 2 of CD97 antigen OS=Mus musculus OX=10090 GN=Cd97	Q9Z0M6;Q9Z0M6-3;Q9Z0M6-2	CD97 antigen	Cd97	15318	4854	4563	15514	4188	6330	18211	19034	6372		11	11	17
	sp|Q8CII2|CD123_MOUSE Cell division cycle protein 123 homolog OS=Mus musculus OX=10090 GN=Cdc123 PE=1 SV=2	Q8CII2;Q8CII2-2	Cell division cycle protein 123 homolog	Cdc123	6285	2098	0	3715	4393	3175	4158	3390	1991		6	6	18.8
	sp|Q8R349|CDC16_MOUSE Cell division cycle protein 16 homolog OS=Mus musculus OX=10090 GN=Cdc16 PE=1 SV=1	Q8R349	Cell division cycle protein 16 homolog	Cdc16	2368	3954	4629	4263	3040	9570	12953	2720	4501		10	10	19.7
	sp|Q8BGZ4|CDC23_MOUSE Cell division cycle protein 23 homolog OS=Mus musculus OX=10090 GN=Cdc23 PE=1 SV=2;sp|Q8BGZ4-2|CDC23_MOUSE Isoform 2 of Cell division cycle protein 23 homolog OS=Mus musculus OX=10090 GN=Cdc23	Q8BGZ4;Q8BGZ4-2	Cell division cycle protein 23 homolog	Cdc23	5309	6811	5796	5606	5238	3954	6802	5124	1821		7	7	14.9
	sp|A2A6Q5|CDC27_MOUSE Cell division cycle protein 27 homolog OS=Mus musculus OX=10090 GN=Cdc27 PE=1 SV=1;sp|A2A6Q5-3|CDC27_MOUSE Isoform 3 of Cell division cycle protein 27 homolog OS=Mus musculus OX=10090 GN=Cdc27;sp|A2A6Q5-2|CDC27_MOUSE Isoform 2 of Cell	A2A6Q5;A2A6Q5-3;A2A6Q5-2	Cell division cycle protein 27 homolog	Cdc27	1040	2135	748	3281	615	0	1557	0	1351		8	8	15.3
	sp|Q8CFI2|UB2R1_MOUSE Ubiquitin-conjugating enzyme E2 R1 OS=Mus musculus OX=10090 GN=Cdc34 PE=1 SV=1	Q8CFI2	Ubiquitin-conjugating enzyme E2 R1	Cdc34	37054	29880	17551	18658	31921	7739	23029	13679	17787		5	4	20.4
	sp|Q61081|CDC37_MOUSE Hsp90 co-chaperone Cdc37 OS=Mus musculus OX=10090 GN=Cdc37 PE=1 SV=1	Q61081	Hsp90 co-chaperone Cdc37;Hsp90 co-chaperone Cdc37, N-terminally processed	Cdc37	193797	201496	263789	186117	168364	116497	191734	159895	181675		9	9	32.7
	sp|Q9DC48|PRP17_MOUSE Pre-mRNA-processing factor 17 OS=Mus musculus OX=10090 GN=Cdc40 PE=2 SV=1	Q9DC48	Pre-mRNA-processing factor 17	Cdc40	12146	5062	5329	4374	13235	7299	6914	11216	6863		9	9	21.6
	sp|P60766|CDC42_MOUSE Cell division control protein 42 homolog OS=Mus musculus OX=10090 GN=Cdc42 PE=1 SV=2;sp|P60766-1|CDC42_MOUSE Isoform 1 of Cell division control protein 42 homolog OS=Mus musculus OX=10090 GN=Cdc42	P60766;P60766-1;Q9ER71-2;Q8R527;Q9ER71	Cell division control protein 42 homolog	Cdc42	1274250	822760	1372460	962214	953718	720520	1030780	891946	949411		10	10	64.4
	sp|Q6A068|CDC5L_MOUSE Cell division cycle 5-like protein OS=Mus musculus OX=10090 GN=Cdc5l PE=1 SV=2	Q6A068	Cell division cycle 5-like protein	Cdc5l	43952	51651	65484	47407	45809	46929	51737	47836	51286		27	27	49.3
	sp|Q8JZM7|CDC73_MOUSE Parafibromin OS=Mus musculus OX=10090 GN=Cdc73 PE=1 SV=1	Q8JZM7	Parafibromin	Cdc73	15038	20191	16598	18567	17914	16173	20016	15781	16251		12	12	29.2
	sp|Q8BHX3-2|BOREA_MOUSE Isoform 2 of Borealin OS=Mus musculus OX=10090 GN=Cdca8;sp|Q8BHX3|BOREA_MOUSE Borealin OS=Mus musculus OX=10090 GN=Cdca8 PE=1 SV=2	Q8BHX3-2;Q8BHX3;Q8BHX3-3	Borealin	Cdca8	8607	0	0	15613	7491	5481	6146	11394	0		7	7	31.6
	sp|Q8VDP6|CDIPT_MOUSE CDP-diacylglycerol--inositol 3-phosphatidyltransferase OS=Mus musculus OX=10090 GN=Cdipt PE=1 SV=1	Q8VDP6	CDP-diacylglycerol--inositol 3-phosphatidyltransferase	Cdipt	85811	64239	94275	24256	5771	12550	47680	7877	31004		5	5	22.1
	sp|P11440|CDK1_MOUSE Cyclin-dependent kinase 1 OS=Mus musculus OX=10090 GN=Cdk1 PE=1 SV=3	P11440	Cyclin-dependent kinase 1	Cdk1	338039	284073	308074	309929	230579	262053	363713	222380	270879		17	15	66
	sp|P24788-2|CD11B_MOUSE Isoform 2 of Cyclin-dependent kinase 11B OS=Mus musculus OX=10090 GN=Cdk11b;sp|P24788|CD11B_MOUSE Cyclin-dependent kinase 11B OS=Mus musculus OX=10090 GN=Cdk11b PE=1 SV=2	P24788-2;P24788	Cyclin-dependent kinase 11B	Cdk11b	20068	28894	24361	26875	17872	22120	28471	30739	12660		15	15	41.9
	sp|Q14AX6-2|CDK12_MOUSE Isoform 2 of Cyclin-dependent kinase 12 OS=Mus musculus OX=10090 GN=Cdk12;sp|Q14AX6-3|CDK12_MOUSE Isoform 3 of Cyclin-dependent kinase 12 OS=Mus musculus OX=10090 GN=Cdk12;sp|Q14AX6|CDK12_MOUSE Cyclin-dependent kinase 12 OS=Mus musc	Q14AX6-2;Q14AX6-3;Q14AX6	Cyclin-dependent kinase 12	Cdk12	1033	1912	1132	1028	1614	964	1361	1675	1077		6	5	8.1
	sp|P97377-2|CDK2_MOUSE Isoform CDK2-alpha of Cyclin-dependent kinase 2 OS=Mus musculus OX=10090 GN=Cdk2;sp|P97377|CDK2_MOUSE Cyclin-dependent kinase 2 OS=Mus musculus OX=10090 GN=Cdk2 PE=1 SV=2	P97377-2;P97377;Q80YP0;Q80YP0-2	Cyclin-dependent kinase 2	Cdk2	41970	9689	37888	35060	55841	60818	51030	48926	48932		9	9	41.3
	sp|P30285|CDK4_MOUSE Cyclin-dependent kinase 4 OS=Mus musculus OX=10090 GN=Cdk4 PE=1 SV=1	P30285	Cyclin-dependent kinase 4	Cdk4	14333	30703	25429	18332	21817	18519	14213	13280	8140		8	8	36
	sp|P49615|CDK5_MOUSE Cyclin-dependent-like kinase 5 OS=Mus musculus OX=10090 GN=Cdk5 PE=1 SV=1	P49615	Cyclin-dependent-like kinase 5	Cdk5	1404	1307	4954	5176	6385	3783	3590	0	2473		3	3	16.8
	sp|Q99LM2|CK5P3_MOUSE CDK5 regulatory subunit-associated protein 3 OS=Mus musculus OX=10090 GN=Cdk5rap3 PE=1 SV=1	Q99LM2	CDK5 regulatory subunit-associated protein 3	Cdk5rap3	0	1702	2711	0	1877	3643	2707	4732	1760		5	5	10.9
	sp|Q64261|CDK6_MOUSE Cyclin-dependent kinase 6 OS=Mus musculus OX=10090 GN=Cdk6 PE=1 SV=2	Q64261;O35495-3;Q3V3A1-3;Q3V3A1;Q04899;Q04735-2;Q04735	Cyclin-dependent kinase 6	Cdk6	121069	125497	142752	183365	121896	144967	146835	103868	142256		16	16	57.7
	sp|Q03147|CDK7_MOUSE Cyclin-dependent kinase 7 OS=Mus musculus OX=10090 GN=Cdk7 PE=1 SV=2	Q03147;Q8BWQ5	Cyclin-dependent kinase 7	Cdk7	63409	6181	42254	5584	6531	1609	11879	43682	15064		4	4	15.9
	sp|Q99J95-3|CDK9_MOUSE Isoform 3 of Cyclin-dependent kinase 9 OS=Mus musculus OX=10090 GN=Cdk9;sp|Q99J95-2|CDK9_MOUSE Isoform 2 of Cyclin-dependent kinase 9 OS=Mus musculus OX=10090 GN=Cdk9;sp|Q99J95|CDK9_MOUSE Cyclin-dependent kinase 9 OS=Mus musculus OX=	Q99J95-3;Q99J95-2;Q99J95	Cyclin-dependent kinase 9	Cdk9	0	0	11195	3923	5736	14249	7724	24435	16025		5	5	25.9
	sp|Q91WE6-3|CDKAL_MOUSE Isoform 3 of Threonylcarbamoyladenosine tRNA methylthiotransferase OS=Mus musculus OX=10090 GN=Cdkal1;sp|Q91WE6-2|CDKAL_MOUSE Isoform 2 of Threonylcarbamoyladenosine tRNA methylthiotransferase OS=Mus musculus OX=10090 GN=Cdkal1;sp|Q	Q91WE6-3;Q91WE6-2;Q91WE6	Threonylcarbamoyladenosine tRNA methylthiotransferase	Cdkal1	0	0	0	0	713	822	890	575	405		1	1	3.4
	sp|Q64364|ARF_MOUSE Tumor suppressor ARF OS=Mus musculus OX=10090 GN=Cdkn2a PE=1 SV=1;sp|Q64364-2|ARF_MOUSE Isoform smARF of Tumor suppressor ARF OS=Mus musculus OX=10090 GN=Cdkn2a	Q64364;Q64364-2	Tumor suppressor ARF	Cdkn2a	32982	3851	4624	16774	0	2301	25423	2936	12840		2	2	14.8
	sp|Q99L43|CDS2_MOUSE Phosphatidate cytidylyltransferase 2 OS=Mus musculus OX=10090 GN=Cds2 PE=1 SV=1	Q99L43	Phosphatidate cytidylyltransferase 2	Cds2	17102	11372	9318	6724	3335	2175	10309	13433	12316		4	4	17.8
	sp|Q4VAA2|CDV3_MOUSE Protein CDV3 OS=Mus musculus OX=10090 GN=Cdv3 PE=1 SV=2;sp|Q4VAA2-2|CDV3_MOUSE Isoform 2 of Protein CDV3 OS=Mus musculus OX=10090 GN=Cdv3	Q4VAA2;Q4VAA2-2	Protein CDV3	Cdv3	88145	94839	111399	55599	95258	108760	64637	26364	85274		9	9	52.3
	sp|Q9D5D8|CDYL2_MOUSE Chromodomain Y-like protein 2 OS=Mus musculus OX=10090 GN=Cdyl2 PE=1 SV=1	Q9D5D8	Chromodomain Y-like protein 2	Cdyl2	0	0	1135	1126	736	1334	1164	0	928		1	1	2.4
	sp|P53569|CEBPZ_MOUSE CCAAT/enhancer-binding protein zeta OS=Mus musculus OX=10090 GN=Cebpz PE=1 SV=2;sp|P53569-2|CEBPZ_MOUSE Isoform CBF2 of CCAAT/enhancer-binding protein zeta OS=Mus musculus OX=10090 GN=Cebpz	P53569;P53569-2	CCAAT/enhancer-binding protein zeta	Cebpz	3721	7362	14693	9803	9734	5733	6820	8903	2509		13	13	14.5
	sp|P28659-2|CELF1_MOUSE Isoform 2 of CUGBP Elav-like family member 1 OS=Mus musculus OX=10090 GN=Celf1;sp|P28659-3|CELF1_MOUSE Isoform 3 of CUGBP Elav-like family member 1 OS=Mus musculus OX=10090 GN=Celf1;sp|P28659|CELF1_MOUSE CUGBP Elav-like family membe	P28659-2;P28659-3;P28659;P28659-4	CUGBP Elav-like family member 1	Celf1	24456	18440	23441	24314	21573	18932	32652	24158	22623		7	7	19.5
	sp|Q9Z0H4-11|CELF2_MOUSE Isoform 11 of CUGBP Elav-like family member 2 OS=Mus musculus OX=10090 GN=Celf2;sp|Q9Z0H4-7|CELF2_MOUSE Isoform 7 of CUGBP Elav-like family member 2 OS=Mus musculus OX=10090 GN=Celf2;sp|Q9Z0H4-5|CELF2_MOUSE Isoform 5 of CUGBP Elav-	Q9Z0H4-11;Q9Z0H4-7;Q9Z0H4-5;Q9Z0H4-4;Q9Z0H4;Q9Z0H4-8;Q9Z0H4-2;Q9Z0H4-6;Q9Z0H4-9	CUGBP Elav-like family member 2	Celf2	104374	86450	108151	99710	88173	137859	134674	135232	98723		10	9	26.9
	sp|O35216|CENPA_MOUSE Histone H3-like centromeric protein A OS=Mus musculus OX=10090 GN=Cenpa PE=2 SV=1	O35216	Histone H3-like centromeric protein A	Cenpa	14588	10260	11727	11891	9633	11462	7429	10098	6921		1	1	8.2
	sp|P49452|CENPC_MOUSE Centromere protein C OS=Mus musculus OX=10090 GN=Cenpc PE=1 SV=2	P49452	Centromere protein C	Cenpc	676	537	687	824	696	0	709	0	610		2	2	3
	sp|Q9CXS4|CENPV_MOUSE Centromere protein V OS=Mus musculus OX=10090 GN=Cenpv PE=1 SV=2	Q9CXS4;Q9CXS4-2	Centromere protein V	Cenpv	30666	21621	13173	10485	23314	26811	52828	10730	32392		7	7	43.3
	sp|Q60952|CP250_MOUSE Centrosome-associated protein CEP250 OS=Mus musculus OX=10090 GN=Cep250 PE=1 SV=4	Q60952	Centrosome-associated protein CEP250	Cep250	1012	1513	3950	1141	0	1962	3610	0	1762		5	5	2.8
	sp|Q8BT07|CEP55_MOUSE Centrosomal protein of 55 kDa OS=Mus musculus OX=10090 GN=Cep55 PE=1 SV=2;sp|Q8BT07-2|CEP55_MOUSE Isoform 2 of Centrosomal protein of 55 kDa OS=Mus musculus OX=10090 GN=Cep55	Q8BT07;Q8BT07-2	Centrosomal protein of 55 kDa	Cep55	7043	18057	17144	14760	20275	10831	19901	14178	13716		14	14	34
	sp|Q924Z4|CERS2_MOUSE Ceramide synthase 2 OS=Mus musculus OX=10090 GN=Cers2 PE=1 SV=1	Q924Z4	Ceramide synthase 2	Cers2	4164	14114	18109	14941	9268	13392	20915	16626	0		5	5	14.5
	sp|Q9D6K9|CERS5_MOUSE Ceramide synthase 5 OS=Mus musculus OX=10090 GN=Cers5 PE=1 SV=1;sp|Q9D6K9-2|CERS5_MOUSE Isoform 2 of Ceramide synthase 5 OS=Mus musculus OX=10090 GN=Cers5	Q9D6K9;Q9D6K9-2	Ceramide synthase 5	Cers5	971	4727	3038	3714	0	877	4133	0	2070		2	2	6.8
	sp|Q9R1K9|CETN2_MOUSE Centrin-2 OS=Mus musculus OX=10090 GN=Cetn2 PE=1 SV=1	Q9R1K9	Centrin-2	Cetn2	6645	7229	4727	4192	7292	6302	6097	3419	5312		2	2	26.7
	sp|O35648|CETN3_MOUSE Centrin-3 OS=Mus musculus OX=10090 GN=Cetn3 PE=1 SV=1	O35648	Centrin-3	Cetn3	4849	0	10182	0	2639	0	4371	0	5189		2	2	18
	sp|Q9D180|CFA57_MOUSE Cilia- and flagella-associated protein 57 OS=Mus musculus OX=10090 GN=Cfap57 PE=1 SV=3	Q9D180	Cilia- and flagella-associated protein 57	Cfap57	0	0	0	0	25503	18665	22359	12312	28680		1	1	0.8
	sp|O88271|CFDP1_MOUSE Craniofacial development protein 1 OS=Mus musculus OX=10090 GN=Cfdp1 PE=1 SV=1	O88271	Craniofacial development protein 1	Cfdp1	40372	22602	26437	31680	27765	26580	20030	30006	22034		7	7	30.2
	sp|P18760|COF1_MOUSE Cofilin-1 OS=Mus musculus OX=10090 GN=Cfl1 PE=1 SV=3	P18760	Cofilin-1	Cfl1	7942120	7409110	8036110	6151660	6477740	6902050	7598780	6164650	6641780		26	23	95.2
	sp|Q9QWF0|CAF1A_MOUSE Chromatin assembly factor 1 subunit A OS=Mus musculus OX=10090 GN=Chaf1a PE=1 SV=1	Q9QWF0	Chromatin assembly factor 1 subunit A	Chaf1a	4210	3483	5892	4509	4292	3859	6005	17475	4582		9	9	15.4
	sp|Q9D0N7|CAF1B_MOUSE Chromatin assembly factor 1 subunit B OS=Mus musculus OX=10090 GN=Chaf1b PE=1 SV=1	Q9D0N7	Chromatin assembly factor 1 subunit B	Chaf1b	6885	5155	9420	10718	1768	8378	9275	5376	8357		6	6	12.8
	sp|Q8K327|CHAP1_MOUSE Chromosome alignment-maintaining phosphoprotein 1 OS=Mus musculus OX=10090 GN=Champ1 PE=1 SV=1	Q8K327	Chromosome alignment-maintaining phosphoprotein 1	Champ1	558	379	0	684	477	1920	948	1072	2235		2	2	2.7
	sp|Q9CRB9|MIC19_MOUSE MICOS complex subunit Mic19 OS=Mus musculus OX=10090 GN=Chchd3 PE=1 SV=1	Q9CRB9	MICOS complex subunit Mic19	Chchd3	71744	78694	87055	58296	52228	56508	72679	60003	62101		4	4	21.6
	sp|Q91VN4|MIC25_MOUSE MICOS complex subunit Mic25 OS=Mus musculus OX=10090 GN=Chchd6 PE=1 SV=2	Q91VN4	MICOS complex subunit Mic25	Chchd6	2972	3067	3720	3114	2895	3884	4182	3667	3873		2	2	11
	sp|P40201|CHD1_MOUSE Chromodomain-helicase-DNA-binding protein 1 OS=Mus musculus OX=10090 GN=Chd1 PE=1 SV=3	P40201	Chromodomain-helicase-DNA-binding protein 1	Chd1	111	595	2234	843	1586	561	1695	1747	943		9	6	7.1
	sp|Q6PDQ2|CHD4_MOUSE Chromodomain-helicase-DNA-binding protein 4 OS=Mus musculus OX=10090 GN=Chd4 PE=1 SV=1	Q6PDQ2;A2A8L1;F7C528;E9Q614;B1AR17;F6V4V3	Chromodomain-helicase-DNA-binding protein 4	Chd4	93526	80613	91548	70213	57554	57763	91548	68843	61866		66	66	44.6
	sp|Q09XV5|CHD8_MOUSE Chromodomain-helicase-DNA-binding protein 8 OS=Mus musculus OX=10090 GN=Chd8 PE=1 SV=1;sp|Q09XV5-2|CHD8_MOUSE Isoform 2 of Chromodomain-helicase-DNA-binding protein 8 OS=Mus musculus OX=10090 GN=Chd8	Q09XV5;Q09XV5-2;Q8BYH8-2;Q8BYH8;A3KFM7-2;A3KFM7	Chromodomain-helicase-DNA-binding protein 8	Chd8	954	186	1730	1099	198	1161	1143	191	988		9	7	5.2
	sp|Q8CGZ0|CHERP_MOUSE Calcium homeostasis endoplasmic reticulum protein OS=Mus musculus OX=10090 GN=Cherp PE=1 SV=1	Q8CGZ0	Calcium homeostasis endoplasmic reticulum protein	Cherp	11539	8161	14683	16354	11828	18812	20399	18288	19466		14	14	17.8
	sp|Q9QXG2|RAE1_MOUSE Rab proteins geranylgeranyltransferase component A 1 OS=Mus musculus OX=10090 GN=Chm PE=1 SV=1	Q9QXG2;Q9QZD5	Rab proteins geranylgeranyltransferase component A 1	Chm	3266	11171	3334	6836	5643	3957	8119	5885	5154		8	8	19.7
	sp|Q921W0|CHM1A_MOUSE Charged multivesicular body protein 1a OS=Mus musculus OX=10090 GN=Chmp1a PE=1 SV=1	Q921W0	Charged multivesicular body protein 1a	Chmp1a	4603	7432	4648	4227	4089	10699	4408	3113	4130		2	2	8.7
	sp|Q99LU0|CH1B1_MOUSE Charged multivesicular body protein 1b-1 OS=Mus musculus OX=10090 GN=Chmp1b1 PE=1 SV=1;sp|Q9CQD4|CH1B2_MOUSE Charged multivesicular body protein 1b-2 OS=Mus musculus OX=10090 GN=Chmp1b2 PE=2 SV=2	Q99LU0;Q9CQD4	Charged multivesicular body protein 1b-1;Charged multivesicular body protein 1b-2	Chmp1b1;Chmp1b2	28827	9906	24162	27045	21349	12995	0	0	6937		2	2	7.5
	sp|Q9DB34|CHM2A_MOUSE Charged multivesicular body protein 2a OS=Mus musculus OX=10090 GN=Chmp2a PE=1 SV=1	Q9DB34	Charged multivesicular body protein 2a	Chmp2a	4116	0	45330	27488	7307	0	6875	0	4047		3	3	14
	sp|Q9D8B3|CHM4B_MOUSE Charged multivesicular body protein 4b OS=Mus musculus OX=10090 GN=Chmp4b PE=1 SV=2	Q9D8B3;Q9D7F7	Charged multivesicular body protein 4b	Chmp4b	137903	171328	341988	139116	145686	173367	201697	171583	163603		8	8	44.6
	sp|Q9D7S9|CHMP5_MOUSE Charged multivesicular body protein 5 OS=Mus musculus OX=10090 GN=Chmp5 PE=1 SV=1	Q9D7S9	Charged multivesicular body protein 5	Chmp5	0	7793	11315	0	9880	3510	0	0	23676		2	2	14.6
	sp|P0C0A3|CHMP6_MOUSE Charged multivesicular body protein 6 OS=Mus musculus OX=10090 GN=Chmp6 PE=1 SV=2	P0C0A3	Charged multivesicular body protein 6	Chmp6	11219	8448	0	11835	2541	8034	16430	10040	0		2	2	13.5
	sp|Q9D1P4|CHRD1_MOUSE Cysteine and histidine-rich domain-containing protein 1 OS=Mus musculus OX=10090 GN=Chordc1 PE=1 SV=1	Q9D1P4	Cysteine and histidine-rich domain-containing protein 1	Chordc1	103882	108229	133212	91305	76825	104579	144062	105584	122147		13	13	46.5
	sp|Q9JKP8|CHRC1_MOUSE Chromatin accessibility complex protein 1 OS=Mus musculus OX=10090 GN=Chrac1 PE=1 SV=1	Q9JKP8	Chromatin accessibility complex protein 1	Chrac1	5513	5458	0	7023	6738	7900	0	5532	0		2	2	20.2
	sp|Q8BIW9|CTF18_MOUSE Chromosome transmission fidelity protein 18 homolog OS=Mus musculus OX=10090 GN=Chtf18 PE=1 SV=2	Q8BIW9	Chromosome transmission fidelity protein 18 homolog	Chtf18	149	0	1567	1563	2242	893	1703	2420	1300		6	6	7.7
	sp|Q9CY57-5|CHTOP_MOUSE Isoform 5 of Chromatin target of PRMT1 protein OS=Mus musculus OX=10090 GN=Chtop;sp|Q9CY57-4|CHTOP_MOUSE Isoform 4 of Chromatin target of PRMT1 protein OS=Mus musculus OX=10090 GN=Chtop;sp|Q9CY57-3|CHTOP_MOUSE Isoform 3 of Chromatin	Q9CY57-5;Q9CY57-4;Q9CY57-3;Q9CY57-2;Q9CY57	Chromatin target of PRMT1 protein	Chtop	64321	65434	75401	23122	40711	75788	96041	236484	52461		7	7	44.1
	sp|Q99KN2|CIAO1_MOUSE Probable cytosolic iron-sulfur protein assembly protein CIAO1 OS=Mus musculus OX=10090 GN=Ciao1 PE=1 SV=1	Q99KN2	Probable cytosolic iron-sulfur protein assembly protein CIAO1	Ciao1	6737	0	12814	7154	7991	7808	7487	6967	3352		5	5	28.6
	sp|Q8WTY4|CPIN1_MOUSE Anamorsin OS=Mus musculus OX=10090 GN=Ciapin1 PE=1 SV=1	Q8WTY4	Anamorsin	Ciapin1	24413	8768	24423	16697	24166	29999	20333	32743	24882		10	10	53.7
	sp|Q9Z0F4|CIB1_MOUSE Calcium and integrin-binding protein 1 OS=Mus musculus OX=10090 GN=Cib1 PE=1 SV=3	Q9Z0F4	Calcium and integrin-binding protein 1	Cib1	2417	0	0	2732	0	6728	2477	7018	0		2	2	14.1
	sp|Q8R2N2|UTP4_MOUSE U3 small nucleolar RNA-associated protein 4 homolog OS=Mus musculus OX=10090 GN=Utp4 PE=2 SV=3	Q8R2N2	Cirhin	Cirh1a	18958	21733	23545	11569	11002	17755	17043	17770	11908		12	12	23.6
	sp|Q91WS0|CISD1_MOUSE CDGSH iron-sulfur domain-containing protein 1 OS=Mus musculus OX=10090 GN=Cisd1 PE=1 SV=1	Q91WS0	CDGSH iron-sulfur domain-containing protein 1	Cisd1	204335	176215	258837	197724	161704	185527	151050	201053	148611		4	4	36.1
	sp|Q9CQB5|CISD2_MOUSE CDGSH iron-sulfur domain-containing protein 2 OS=Mus musculus OX=10090 GN=Cisd2 PE=1 SV=1	Q9CQB5	CDGSH iron-sulfur domain-containing protein 2	Cisd2	21233	0	45036	25723	15212	29725	22455	19048	19615		1	1	11.1
	sp|P49025-4|CTRO_MOUSE Isoform 4 of Citron Rho-interacting kinase OS=Mus musculus OX=10090 GN=Cit;sp|P49025|CTRO_MOUSE Citron Rho-interacting kinase OS=Mus musculus OX=10090 GN=Cit PE=1 SV=3;sp|P49025-5|CTRO_MOUSE Isoform 5 of Citron Rho-interacting kinase	P49025-4;P49025;P49025-5;P49025-3;P49025-2	Citron Rho-interacting kinase	Cit	416	0	1913	1699	1178	586	884	135	1303		10	10	6.2
	sp|A2AGT5|CKAP5_MOUSE Cytoskeleton-associated protein 5 OS=Mus musculus OX=10090 GN=Ckap5 PE=1 SV=1;sp|A2AGT5-3|CKAP5_MOUSE Isoform 3 of Cytoskeleton-associated protein 5 OS=Mus musculus OX=10090 GN=Ckap5;sp|A2AGT5-2|CKAP5_MOUSE Isoform 2 of Cytoskeleton-a	A2AGT5;A2AGT5-3;A2AGT5-2	Cytoskeleton-associated protein 5	Ckap5	15544	15166	24485	19744	10030	21705	24269	16660	19694		51	51	31.4
	sp|Q04447|KCRB_MOUSE Creatine kinase B-type OS=Mus musculus OX=10090 GN=Ckb PE=1 SV=1	Q04447;P07310	Creatine kinase B-type	Ckb	10988	19463	20732	11186	5757	12243	8691	9528	2473		7	7	32.5
	sp|Q80TV8|CLAP1_MOUSE CLIP-associating protein 1 OS=Mus musculus OX=10090 GN=Clasp1 PE=1 SV=2;sp|Q80TV8-2|CLAP1_MOUSE Isoform 2 of CLIP-associating protein 1 OS=Mus musculus OX=10090 GN=Clasp1	Q80TV8;Q80TV8-2	CLIP-associating protein 1	Clasp1	5053	3310	5108	4587	1868	1966	6337	4150	1529		13	11	13.7
	sp|Q8BRT1|CLAP2_MOUSE CLIP-associating protein 2 OS=Mus musculus OX=10090 GN=Clasp2 PE=1 SV=1	Q8BRT1;Q8BRT1-6	CLIP-associating protein 2	Clasp2	1960	1497	0	2514	1338	854	2288	1373	982		10	6	13.8
	sp|Q91V08|CLC2D_MOUSE C-type lectin domain family 2 member D OS=Mus musculus OX=10090 GN=Clec2d PE=1 SV=1	Q91V08;Q9D676-2;Q9D676	C-type lectin domain family 2 member D	Clec2d	10802	6133	5199	23859	29088	26426	32752	38503	14266		5	5	31.4
	sp|Q9Z1Q5|CLIC1_MOUSE Chloride intracellular channel protein 1 OS=Mus musculus OX=10090 GN=Clic1 PE=1 SV=3	Q9Z1Q5	Chloride intracellular channel protein 1	Clic1	803900	780432	978629	874668	774904	910221	1021090	790039	850157		22	22	89.6
	sp|Q9QYB1|CLIC4_MOUSE Chloride intracellular channel protein 4 OS=Mus musculus OX=10090 GN=Clic4 PE=1 SV=3	Q9QYB1	Chloride intracellular channel protein 4	Clic4	74004	91574	107242	56301	50450	45991	79317	32801	94188		14	14	71.5
	sp|Q8BXK9|CLIC5_MOUSE Chloride intracellular channel protein 5 OS=Mus musculus OX=10090 GN=Clic5 PE=1 SV=1;sp|Q8BHB9|CLIC6_MOUSE Chloride intracellular channel protein 6 OS=Mus musculus OX=10090 GN=Clic6 PE=1 SV=1	Q8BXK9;Q8BHB9	Chloride intracellular channel protein 5;Chloride intracellular channel protein 6	Clic5;Clic6	5321	3946	5524	4905	5801	5396	5366	5396	0		1	1	6.8
	sp|Q99KN9-2|EPN4_MOUSE Isoform 2 of Clathrin interactor 1 OS=Mus musculus OX=10090 GN=Clint1;sp|Q99KN9|EPN4_MOUSE Clathrin interactor 1 OS=Mus musculus OX=10090 GN=Clint1 PE=1 SV=2	Q99KN9-2;Q99KN9	Clathrin interactor 1	Clint1	29681	41611	49811	40263	33478	24524	40226	32684	32270		11	11	27.6
	sp|Q922J3|CLIP1_MOUSE CAP-Gly domain-containing linker protein 1 OS=Mus musculus OX=10090 GN=Clip1 PE=1 SV=1;sp|Q922J3-2|CLIP1_MOUSE Isoform 2 of CAP-Gly domain-containing linker protein 1 OS=Mus musculus OX=10090 GN=Clip1	Q922J3;Q922J3-2;Q9Z0H8-2;Q9Z0H8	CAP-Gly domain-containing linker protein 1	Clip1	5075	4638	9381	4756	7016	4528	6996	5802	5247		13	13	11
	sp|O35492|CLK3_MOUSE Dual specificity protein kinase CLK3 OS=Mus musculus OX=10090 GN=Clk3 PE=1 SV=2	O35492	Dual specificity protein kinase CLK3	Clk3	3460	3599	2657	2122	0	0	0	1136	2638		7	7	14.3
	sp|Q99LI9|CLP1_MOUSE Polyribonucleotide 5-hydroxyl-kinase Clp1 OS=Mus musculus OX=10090 GN=Clp1 PE=1 SV=1	Q99LI9	Polyribonucleotide 5-hydroxyl-kinase Clp1	Clp1	6740	4963	6589	5043	1479	2960	6416	2506	5634		3	3	9.2
	sp|Q8VBZ3|CLPT1_MOUSE Cleft lip and palate transmembrane protein 1 homolog OS=Mus musculus OX=10090 GN=Clptm1 PE=1 SV=1	Q8VBZ3	Cleft lip and palate transmembrane protein 1 homolog	Clptm1	3866	2817	4310	3544	7342	4913	7271	5433	1357		10	10	22.1
	sp|Q8BXA5|CLP1L_MOUSE Cleft lip and palate transmembrane protein 1-like protein OS=Mus musculus OX=10090 GN=Clptm1l PE=1 SV=1	Q8BXA5	Cleft lip and palate transmembrane protein 1-like protein	Clptm1l	3909	2831	1791	1333	968	1376	3799	1828	0		2	2	5.4
	sp|Q9JHS4|CLPX_MOUSE ATP-dependent Clp protease ATP-binding subunit clpX-like, mitochondrial OS=Mus musculus OX=10090 GN=Clpx PE=1 SV=2	Q9JHS4	ATP-dependent Clp protease ATP-binding subunit clpX-like, mitochondrial	Clpx	10526	7104	10466	6895	5146	3984	7048	15205	13077		8	8	14.4
	sp|Q68FD5|CLH1_MOUSE Clathrin heavy chain 1 OS=Mus musculus OX=10090 GN=Cltc PE=1 SV=3	Q68FD5	Clathrin heavy chain 1	Cltc	303388	297571	342698	258375	192956	210581	304783	237497	220748		80	80	60
	sp|Q5SW19|CLU_MOUSE Clustered mitochondria protein homolog OS=Mus musculus OX=10090 GN=Cluh PE=1 SV=2;sp|Q5SW19-3|CLU_MOUSE Isoform 3 of Clustered mitochondria protein homolog OS=Mus musculus OX=10090 GN=Cluh;sp|Q5SW19-2|CLU_MOUSE Isoform 2 of Clustered mi	Q5SW19;Q5SW19-3;Q5SW19-2	Clustered mitochondria protein homolog	Cluh	6593	2501	6630	5471	5067	2631	7652	4669	2473		22	22	24.4
	sp|Q99KK2|NEUA_MOUSE N-acylneuraminate cytidylyltransferase OS=Mus musculus OX=10090 GN=Cmas PE=1 SV=2;sp|Q99KK2-2|NEUA_MOUSE Isoform 2 of N-acylneuraminate cytidylyltransferase OS=Mus musculus OX=10090 GN=Cmas	Q99KK2;Q99KK2-2	N-acylneuraminate cytidylyltransferase	Cmas	22259	21652	37136	41330	19856	15445	36839	20003	26642		14	14	33.6
	sp|Q9DBP5|KCY_MOUSE UMP-CMP kinase OS=Mus musculus OX=10090 GN=Cmpk1 PE=1 SV=1	Q9DBP5	UMP-CMP kinase	Cmpk1	198807	223205	296478	149718	89052	144542	248553	209646	210544		15	15	60.2
	sp|Q9CZT6|CMS1_MOUSE Protein CMSS1 OS=Mus musculus OX=10090 GN=Cmss1 PE=2 SV=1	Q9CZT6	Protein CMSS1	Cmss1	20684	11544	27352	30486	25810	31183	21356	16273	32856		5	5	21.7
	sp|Q9ESD6-2|CKLF7_MOUSE Isoform 2 of CKLF-like MARVEL transmembrane domain-containing protein 7 OS=Mus musculus OX=10090 GN=Cmtm7;sp|Q9ESD6|CKLF7_MOUSE CKLF-like MARVEL transmembrane domain-containing protein 7 OS=Mus musculus OX=10090 GN=Cmtm7 PE=1 SV=1	Q9ESD6-2;Q9ESD6	CKLF-like MARVEL transmembrane domain-containing protein 7	Cmtm7	165632	156329	185623	138153	6379	103487	102762	189924	140550		3	3	30.6
	sp|Q9DBC3|CMTR1_MOUSE Cap-specific mRNA (nucleoside-2-O-)-methyltransferase 1 OS=Mus musculus OX=10090 GN=Cmtr1 PE=1 SV=1	Q9DBC3	Cap-specific mRNA (nucleoside-2-O-)-methyltransferase 1	Cmtr1	9754	7900	10723	8386	10492	9557	7975	9533	11148		16	16	28.7
	sp|P53996|CNBP_MOUSE Cellular nucleic acid-binding protein OS=Mus musculus OX=10090 GN=Cnbp PE=1 SV=2	P53996	Cellular nucleic acid-binding protein	Cnbp	6324	8603	7066	7656	11617	6348	7259	5364	4470		1	1	50.6
	sp|P53996-2|CNBP_MOUSE Isoform 2 of Cellular nucleic acid-binding protein OS=Mus musculus OX=10090 GN=Cnbp;sp|P53996-3|CNBP_MOUSE Isoform 3 of Cellular nucleic acid-binding protein OS=Mus musculus OX=10090 GN=Cnbp	P53996-2;P53996-3	Cellular nucleic acid-binding protein	Cnbp	236747	154947	146492	195154	175194	153261	212192	154177	184779		10	2	55.9
	sp|Q9D1A2|CNDP2_MOUSE Cytosolic non-specific dipeptidase OS=Mus musculus OX=10090 GN=Cndp2 PE=1 SV=1	Q9D1A2	Cytosolic non-specific dipeptidase	Cndp2	828146	802924	825813	747031	650990	683698	782591	526005	646003		31	31	81.7
	sp|Q9CX13|CNIH4_MOUSE Protein cornichon homolog 4 OS=Mus musculus OX=10090 GN=Cnih4 PE=2 SV=1	Q9CX13	Protein cornichon homolog 4	Cnih4	46513	27310	34443	40538	25325	29657	53014	45634	14130		1	1	14.4
	sp|Q08093|CNN2_MOUSE Calponin-2 OS=Mus musculus OX=10090 GN=Cnn2 PE=1 SV=1	Q08093;Q9DAW9	Calponin-2	Cnn2	197739	70547	174734	152090	178608	223445	145753	83130	111776		12	12	47.2
	sp|Q6ZQ08|CNOT1_MOUSE CCR4-NOT transcription complex subunit 1 OS=Mus musculus OX=10090 GN=Cnot1 PE=1 SV=2;sp|Q6ZQ08-4|CNOT1_MOUSE Isoform 4 of CCR4-NOT transcription complex subunit 1 OS=Mus musculus OX=10090 GN=Cnot1;sp|Q6ZQ08-2|CNOT1_MOUSE Isoform 2 of	Q6ZQ08;Q6ZQ08-4;Q6ZQ08-2;Q6ZQ08-3	CCR4-NOT transcription complex subunit 1	Cnot1	14609	11122	17019	14525	12768	13951	15889	15285	12029		46	46	25.4
	sp|Q8BH15-2|CNO10_MOUSE Isoform 2 of CCR4-NOT transcription complex subunit 10 OS=Mus musculus OX=10090 GN=Cnot10;sp|Q8BH15|CNO10_MOUSE CCR4-NOT transcription complex subunit 10 OS=Mus musculus OX=10090 GN=Cnot10 PE=1 SV=1;sp|Q8BH15-3|CNO10_MOUSE Isoform 3	Q8BH15-2;Q8BH15;Q8BH15-3;Q8BH15-4;Q8BH15-5;Q8BH15-6	CCR4-NOT transcription complex subunit 10	Cnot10	4753	6249	7354	6881	2788	2472	8565	4828	3668		9	9	19.5
	sp|Q9CWN7|CNO11_MOUSE CCR4-NOT transcription complex subunit 11 OS=Mus musculus OX=10090 GN=Cnot11 PE=1 SV=1	Q9CWN7	CCR4-NOT transcription complex subunit 11	Cnot11	2521	3680	5420	2896	2513	2824	3788	2850	2659		3	3	7.9
	sp|Q8C5L3-3|CNOT2_MOUSE Isoform 3 of CCR4-NOT transcription complex subunit 2 OS=Mus musculus OX=10090 GN=Cnot2;sp|Q8C5L3-2|CNOT2_MOUSE Isoform 2 of CCR4-NOT transcription complex subunit 2 OS=Mus musculus OX=10090 GN=Cnot2;sp|Q8C5L3|CNOT2_MOUSE CCR4-NOT t	Q8C5L3-3;Q8C5L3-2;Q8C5L3	CCR4-NOT transcription complex subunit 2	Cnot2	8797	10185	7306	9304	8456	11286	8815	7541	8659		6	6	24
	sp|Q8K0V4|CNOT3_MOUSE CCR4-NOT transcription complex subunit 3 OS=Mus musculus OX=10090 GN=Cnot3 PE=1 SV=1	Q8K0V4	CCR4-NOT transcription complex subunit 3	Cnot3	3544	6856	5157	5296	4422	0	1934	2133	6135		7	7	14.9
	sp|Q8BT14-2|CNOT4_MOUSE Isoform 2 of CCR4-NOT transcription complex subunit 4 OS=Mus musculus OX=10090 GN=Cnot4;sp|Q8BT14|CNOT4_MOUSE CCR4-NOT transcription complex subunit 4 OS=Mus musculus OX=10090 GN=Cnot4 PE=1 SV=2;sp|Q8BT14-3|CNOT4_MOUSE Isoform 3 of	Q8BT14-2;Q8BT14;Q8BT14-3	CCR4-NOT transcription complex subunit 4	Cnot4	0	880	2099	1209	1574	1268	2803	0	1011		4	4	8.6
	sp|Q60809|CNOT7_MOUSE CCR4-NOT transcription complex subunit 7 OS=Mus musculus OX=10090 GN=Cnot7 PE=1 SV=1	Q60809	CCR4-NOT transcription complex subunit 7	Cnot7	2441	1398	0	2047	1539	1415	2684	0	2619		1	1	7.7
	sp|Q9D8X5|CNOT8_MOUSE CCR4-NOT transcription complex subunit 8 OS=Mus musculus OX=10090 GN=Cnot8 PE=2 SV=1	Q9D8X5	CCR4-NOT transcription complex subunit 8	Cnot8	4171	4565	15600	11803	2424	6637	12740	6251	2577		6	6	27.4
	sp|P16330-2|CN37_MOUSE Isoform CNPI of 2,3-cyclic-nucleotide 3-phosphodiesterase OS=Mus musculus OX=10090 GN=Cnp;sp|P16330|CN37_MOUSE 2,3-cyclic-nucleotide 3-phosphodiesterase OS=Mus musculus OX=10090 GN=Cnp PE=1 SV=3	P16330-2;P16330	2,3-cyclic-nucleotide 3-phosphodiesterase	Cnp	70406	71044	82207	50153	41459	28139	80233	71770	53505		10	10	34.2
	sp|Q9QXT0|CNPY2_MOUSE Protein canopy homolog 2 OS=Mus musculus OX=10090 GN=Cnpy2 PE=1 SV=1	Q9QXT0	Protein canopy homolog 2	Cnpy2	35060	33271	63704	64296	35364	63970	32837	50686	52801		5	5	31.9
	sp|Q9DAU1|CNPY3_MOUSE Protein canopy homolog 3 OS=Mus musculus OX=10090 GN=Cnpy3 PE=1 SV=1	Q9DAU1;Q9DAU1-2	Protein canopy homolog 3	Cnpy3	11286	19574	11101	10409	22239	21960	27817	24142	14447		5	5	22.8
	sp|A2AL36|CNTRL_MOUSE Centriolin OS=Mus musculus OX=10090 GN=Cntrl PE=1 SV=2	A2AL36	Centriolin	Cntrl	0	1268	434	690	0	422	0	462	205		7	7	3.9
	sp|Q9DBL7|COASY_MOUSE Bifunctional coenzyme A synthase OS=Mus musculus OX=10090 GN=Coasy PE=1 SV=2	Q9DBL7	Bifunctional coenzyme A synthase;Phosphopantetheine adenylyltransferase;Dephospho-CoA kinase	Coasy	358	4681	6974	7435	1209	533	5815	4231	4011		6	6	19.2
	sp|Q3UMF0-3|COBL1_MOUSE Isoform 3 of Cordon-bleu protein-like 1 OS=Mus musculus OX=10090 GN=Cobll1;sp|Q3UMF0-4|COBL1_MOUSE Isoform 4 of Cordon-bleu protein-like 1 OS=Mus musculus OX=10090 GN=Cobll1;sp|Q3UMF0-2|COBL1_MOUSE Isoform 2 of Cordon-bleu protein-l	Q3UMF0-3;Q3UMF0-4;Q3UMF0-2;Q3UMF0	Cordon-bleu protein-like 1	Cobll1	993	0	0	1602	0	1597	1280	1189	1240		2	2	2.4
	sp|Q8CI04|COG3_MOUSE Conserved oligomeric Golgi complex subunit 3 OS=Mus musculus OX=10090 GN=Cog3 PE=1 SV=3	Q8CI04	Conserved oligomeric Golgi complex subunit 3	Cog3	896	699	940	711	0	731	0	554	687		3	3	4.6
	sp|Q8R1U1|COG4_MOUSE Conserved oligomeric Golgi complex subunit 4 OS=Mus musculus OX=10090 GN=Cog4 PE=1 SV=1	Q8R1U1	Conserved oligomeric Golgi complex subunit 4	Cog4	1207	0	0	3468	0	2751	2474	2766	1792		5	5	9.9
	sp|Q8C0L8|COG5_MOUSE Conserved oligomeric Golgi complex subunit 5 OS=Mus musculus OX=10090 GN=Cog5 PE=1 SV=3	Q8C0L8	Conserved oligomeric Golgi complex subunit 5	Cog5	5124	2167	2587	1675	1863	0	906	1216	1175		4	4	5.8
	sp|Q3UM29|COG7_MOUSE Conserved oligomeric Golgi complex subunit 7 OS=Mus musculus OX=10090 GN=Cog7 PE=1 SV=1	Q3UM29	Conserved oligomeric Golgi complex subunit 7	Cog7	3695	1764	3305	1049	2143	1284	2800	934	2366		5	5	10.5
	sp|Q9JJA2|COG8_MOUSE Conserved oligomeric Golgi complex subunit 8 OS=Mus musculus OX=10090 GN=Cog8 PE=1 SV=3	Q9JJA2	Conserved oligomeric Golgi complex subunit 8	Cog8	1167	0	1243	0	1052	700	2090	1332	1036		4	4	10
	sp|Q5SU73|COIL_MOUSE Coilin OS=Mus musculus OX=10090 GN=Coil PE=1 SV=1	Q5SU73	Coilin	Coil	0	0	1042	924	810	1297	1388	1049	1070		1	1	3
	sp|P11087|CO1A1_MOUSE Collagen alpha-1(I) chain OS=Mus musculus OX=10090 GN=Col1a1 PE=1 SV=4;sp|P11087-2|CO1A1_MOUSE Isoform 2 of Collagen alpha-1(I) chain OS=Mus musculus OX=10090 GN=Col1a1	P11087;P11087-2	Collagen alpha-1(I) chain	Col1a1	1387	1708	2458	1462	2059	2875	1798	1789	1903		2	2	2.5
	sp|Q9EQG9|C43BP_MOUSE Collagen type IV alpha-3-binding protein OS=Mus musculus OX=10090 GN=Col4a3bp PE=1 SV=1;sp|Q9EQG9-2|C43BP_MOUSE Isoform 2 of Collagen type IV alpha-3-binding protein OS=Mus musculus OX=10090 GN=Col4a3bp;sp|Q9EQG9-3|C43BP_MOUSE Isoform	Q9EQG9;Q9EQG9-2;Q9EQG9-3	Collagen type IV alpha-3-binding protein	Col4a3bp	2231	9815	3034	7754	7398	6921	2383	2979	9420		10	10	19.7
	sp|Q8K297|GT251_MOUSE Procollagen galactosyltransferase 1 OS=Mus musculus OX=10090 GN=Colgalt1 PE=1 SV=2	Q8K297	Procollagen galactosyltransferase 1	Colgalt1	6901	4190	8891	9714	9083	10440	6814	7559	12043		8	8	16.4
	sp|Q8BXC6|COMD2_MOUSE COMM domain-containing protein 2 OS=Mus musculus OX=10090 GN=Commd2 PE=1 SV=1	Q8BXC6	COMM domain-containing protein 2	Commd2	17884	12598	16673	17852	13339	14147	15503	8633	10251		3	3	13.1
	sp|O88587-2|COMT_MOUSE Isoform Soluble of Catechol O-methyltransferase OS=Mus musculus OX=10090 GN=Comt;sp|O88587|COMT_MOUSE Catechol O-methyltransferase OS=Mus musculus OX=10090 GN=Comt PE=1 SV=2	O88587-2;O88587	Catechol O-methyltransferase	Comt	3773	30089	16957	7272	10683	7275	2662	4826	16799		6	6	40.1
	sp|Q8BIG7|CMTD1_MOUSE Catechol O-methyltransferase domain-containing protein 1 OS=Mus musculus OX=10090 GN=Comtd1 PE=1 SV=1	Q8BIG7	Catechol O-methyltransferase domain-containing protein 1	Comtd1	12655	0	5005	8951	3103	7770	6445	6270	0		2	2	10.7
	sp|Q8CIE6|COPA_MOUSE Coatomer subunit alpha OS=Mus musculus OX=10090 GN=Copa PE=1 SV=2	Q8CIE6	Coatomer subunit alpha;Xenin;Proxenin	Copa	122056	105168	116423	86418	91139	98879	141617	108803	90574		59	59	60.2
	sp|Q9JIF7|COPB_MOUSE Coatomer subunit beta OS=Mus musculus OX=10090 GN=Copb1 PE=1 SV=1	Q9JIF7	Coatomer subunit beta	Copb1	142230	153963	193048	127515	109632	111797	135194	107921	104583		34	34	46.9
	sp|O55029|COPB2_MOUSE Coatomer subunit beta OS=Mus musculus OX=10090 GN=Copb2 PE=1 SV=2	O55029	Coatomer subunit beta	Copb2	100960	71566	90835	59964	50377	64565	97968	67125	74818		38	38	55.9
	sp|O89079|COPE_MOUSE Coatomer subunit epsilon OS=Mus musculus OX=10090 GN=Cope PE=1 SV=3	O89079	Coatomer subunit epsilon	Cope	58837	61340	117309	68831	26801	43711	69503	50256	62758		11	11	49.4
	sp|Q9QZE5|COPG1_MOUSE Coatomer subunit gamma-1 OS=Mus musculus OX=10090 GN=Copg1 PE=1 SV=1	Q9QZE5	Coatomer subunit gamma-1	Copg1	122963	121566	190259	119299	97784	107101	126643	91691	108871		34	32	56.1
	sp|Q9QXK3-4|COPG2_MOUSE Isoform 4 of Coatomer subunit gamma-2 OS=Mus musculus OX=10090 GN=Copg2;sp|Q9QXK3|COPG2_MOUSE Coatomer subunit gamma-2 OS=Mus musculus OX=10090 GN=Copg2 PE=1 SV=1	Q9QXK3-4;Q9QXK3;Q9QXK3-3;Q9QXK3-2	Coatomer subunit gamma-2	Copg2	6264	6657	12286	7164	6152	7595	6252	7005	10542		11	11	24.5
	sp|P61202|CSN2_MOUSE COP9 signalosome complex subunit 2 OS=Mus musculus OX=10090 GN=Cops2 PE=1 SV=1;sp|P61202-2|CSN2_MOUSE Isoform 2 of COP9 signalosome complex subunit 2 OS=Mus musculus OX=10090 GN=Cops2	P61202;P61202-2	COP9 signalosome complex subunit 2	Cops2	46829	54736	70315	58520	34617	32542	49637	58406	57240		13	13	38.1
	sp|O88543|CSN3_MOUSE COP9 signalosome complex subunit 3 OS=Mus musculus OX=10090 GN=Cops3 PE=1 SV=3	O88543	COP9 signalosome complex subunit 3	Cops3	34381	22896	56117	28297	32744	42511	37911	39641	34345		13	13	44.2
	sp|O88544|CSN4_MOUSE COP9 signalosome complex subunit 4 OS=Mus musculus OX=10090 GN=Cops4 PE=1 SV=1	O88544	COP9 signalosome complex subunit 4	Cops4	45190	58970	80173	51161	42494	58615	84789	44816	60982		17	17	56.4
	sp|O35864|CSN5_MOUSE COP9 signalosome complex subunit 5 OS=Mus musculus OX=10090 GN=Cops5 PE=1 SV=3	O35864	COP9 signalosome complex subunit 5	Cops5	46228	42064	33485	47778	33403	42869	47744	42080	36877		12	12	51.5
	sp|O88545|CSN6_MOUSE COP9 signalosome complex subunit 6 OS=Mus musculus OX=10090 GN=Cops6 PE=1 SV=1	O88545	COP9 signalosome complex subunit 6	Cops6	68494	56477	83710	61040	54829	49885	67062	46232	39315		9	9	39.2
	sp|Q9CZ04|CSN7A_MOUSE COP9 signalosome complex subunit 7a OS=Mus musculus OX=10090 GN=Cops7a PE=1 SV=2;sp|Q9CZ04-2|CSN7A_MOUSE Isoform 2 of COP9 signalosome complex subunit 7a OS=Mus musculus OX=10090 GN=Cops7a	Q9CZ04;Q9CZ04-2	COP9 signalosome complex subunit 7a	Cops7a	27831	20815	54027	27931	19711	24456	24960	19655	20902		5	5	29.1
	sp|Q8BV13|CSN7B_MOUSE COP9 signalosome complex subunit 7b OS=Mus musculus OX=10090 GN=Cops7b PE=1 SV=1	Q8BV13	COP9 signalosome complex subunit 7b	Cops7b	8185	7645	15322	7250	5226	3067	7997	6578	6264		3	3	15.2
	sp|P61924|COPZ1_MOUSE Coatomer subunit zeta-1 OS=Mus musculus OX=10090 GN=Copz1 PE=1 SV=1	P61924	Coatomer subunit zeta-1	Copz1	31438	46287	110264	43386	38185	34654	48044	27200	64433		2	2	14.1
	sp|Q8R1S0|COQ6_MOUSE Ubiquinone biosynthesis monooxygenase COQ6, mitochondrial OS=Mus musculus OX=10090 GN=Coq6 PE=1 SV=3	Q8R1S0	Ubiquinone biosynthesis monooxygenase COQ6, mitochondrial	Coq6	2361	1522	0	4382	920	2435	2806	0	1755		4	4	8.4
	sp|Q8K1Z0|COQ9_MOUSE Ubiquinone biosynthesis protein COQ9, mitochondrial OS=Mus musculus OX=10090 GN=Coq9 PE=1 SV=1	Q8K1Z0	Ubiquinone biosynthesis protein COQ9, mitochondrial	Coq9	1873	0	1453	1322	1262	1635	1994	1601	2561		3	3	16
	sp|O89053|COR1A_MOUSE Coronin-1A OS=Mus musculus OX=10090 GN=Coro1a PE=1 SV=5	O89053	Coronin-1A	Coro1a	2667680	2898250	3542220	2714610	2830140	2635140	2609250	2425610	1966570		40	39	64.4
	sp|Q9WUM3|COR1B_MOUSE Coronin-1B OS=Mus musculus OX=10090 GN=Coro1b PE=1 SV=1	Q9WUM3	Coronin-1B	Coro1b	62180	59404	53170	27788	36883	51800	39260	38351	25930		13	13	29.1
	sp|Q9WUM4|COR1C_MOUSE Coronin-1C OS=Mus musculus OX=10090 GN=Coro1c PE=1 SV=2	Q9WUM4	Coronin-1C	Coro1c	64476	68820	60286	63710	46763	41460	62981	53082	50244		15	13	39.7
	sp|Q8C0P5|COR2A_MOUSE Coronin-2A OS=Mus musculus OX=10090 GN=Coro2a PE=2 SV=1	Q8C0P5;Q8BJF9	Coronin-2A	Coro2a	82569	48391	98247	82171	68669	92827	103174	113648	64481		19	19	44.8
	sp|Q9D2V7|CORO7_MOUSE Coronin-7 OS=Mus musculus OX=10090 GN=Coro7 PE=1 SV=2	Q9D2V7	Coronin-7	Coro7	82502	48204	88869	107231	73880	76311	86357	63584	66791		33	33	58.2
	sp|Q9CQI6|COTL1_MOUSE Coactosin-like protein OS=Mus musculus OX=10090 GN=Cotl1 PE=1 SV=3	Q9CQI6	Coactosin-like protein	Cotl1	602180	909570	959810	902571	528519	682317	873920	513962	620943		8	8	61.3
	sp|P19783|COX41_MOUSE Cytochrome c oxidase subunit 4 isoform 1, mitochondrial OS=Mus musculus OX=10090 GN=Cox4i1 PE=1 SV=2	P19783	Cytochrome c oxidase subunit 4 isoform 1, mitochondrial	Cox4i1	385600	366694	328928	368547	180995	452043	399594	439298	281094		9	9	50.3
	sp|P19536|COX5B_MOUSE Cytochrome c oxidase subunit 5B, mitochondrial OS=Mus musculus OX=10090 GN=Cox5b PE=1 SV=1	P19536	Cytochrome c oxidase subunit 5B, mitochondrial	Cox5b	26248	12622	0	20274	22013	68234	0	41757	26898		2	2	15.6
	sp|P56391|CX6B1_MOUSE Cytochrome c oxidase subunit 6B1 OS=Mus musculus OX=10090 GN=Cox6b1 PE=1 SV=2	P56391	Cytochrome c oxidase subunit 6B1	Cox6b1	33191	0	0	11988	0	17821	19622	19120	0		2	2	39.5
	sp|Q9CPQ1|COX6C_MOUSE Cytochrome c oxidase subunit 6C OS=Mus musculus OX=10090 GN=Cox6c PE=1 SV=3	Q9CPQ1	Cytochrome c oxidase subunit 6C	Cox6c	295693	203701	0	250971	74276	262037	201024	222504	130299		3	3	28.9
	sp|Q8C166|CPNE1_MOUSE Copine-1 OS=Mus musculus OX=10090 GN=Cpne1 PE=1 SV=1	Q8C166	Copine-1	Cpne1	30801	37799	24520	30598	31157	41545	37744	34143	25673		9	9	25.9
	sp|Q8BT60|CPNE3_MOUSE Copine-3 OS=Mus musculus OX=10090 GN=Cpne3 PE=1 SV=2	Q8BT60	Copine-3	Cpne3	32219	8996	32565	35644	20530	35179	40413	9886	23474		14	13	33.2
	sp|P36552|HEM6_MOUSE Oxygen-dependent coproporphyrinogen-III oxidase, mitochondrial OS=Mus musculus OX=10090 GN=Cpox PE=1 SV=2	P36552	Oxygen-dependent coproporphyrinogen-III oxidase, mitochondrial	Cpox	12436	7136	10943	10132	0	7098	6294	8207	3455		8	8	25.5
	sp|Q9EPU4|CPSF1_MOUSE Cleavage and polyadenylation specificity factor subunit 1 OS=Mus musculus OX=10090 GN=Cpsf1 PE=1 SV=1	Q9EPU4	Cleavage and polyadenylation specificity factor subunit 1	Cpsf1	5119	3420	2769	7788	2712	1655	5797	4172	2172		19	19	19.1
	sp|O35218|CPSF2_MOUSE Cleavage and polyadenylation specificity factor subunit 2 OS=Mus musculus OX=10090 GN=Cpsf2 PE=1 SV=1	O35218	Cleavage and polyadenylation specificity factor subunit 2	Cpsf2	13528	12473	23105	21209	19951	16868	27560	21065	22252		18	18	35.3
	sp|Q9QXK7|CPSF3_MOUSE Cleavage and polyadenylation specificity factor subunit 3 OS=Mus musculus OX=10090 GN=Cpsf3 PE=1 SV=2	Q9QXK7	Cleavage and polyadenylation specificity factor subunit 3	Cpsf3	17653	21824	30252	24066	17395	12945	21114	14647	16561		13	13	28.5
	sp|Q9CWS4|INT11_MOUSE Integrator complex subunit 11 OS=Mus musculus OX=10090 GN=Ints11 PE=1 SV=1	Q9CWS4	Integrator complex subunit 11	Cpsf3l	12720	4104	9552	4818	5853	13995	8184	6580	6457		6	6	12.5
	sp|Q8BQZ5|CPSF4_MOUSE Cleavage and polyadenylation specificity factor subunit 4 OS=Mus musculus OX=10090 GN=Cpsf4 PE=2 SV=1;sp|Q8BQZ5-3|CPSF4_MOUSE Isoform 3 of Cleavage and polyadenylation specificity factor subunit 4 OS=Mus musculus OX=10090 GN=Cpsf4;sp|	Q8BQZ5;Q8BQZ5-3;Q8BQZ5-2	Cleavage and polyadenylation specificity factor subunit 4	Cpsf4	16965	9182	11671	12301	11285	10777	16771	10871	3467		4	4	21.8
	sp|Q6NVF9|CPSF6_MOUSE Cleavage and polyadenylation specificity factor subunit 6 OS=Mus musculus OX=10090 GN=Cpsf6 PE=1 SV=1	Q6NVF9	Cleavage and polyadenylation specificity factor subunit 6	Cpsf6	96512	53334	154628	134568	92424	117147	136592	111221	92448		10	10	22.3
	sp|Q8BTV2|CPSF7_MOUSE Cleavage and polyadenylation specificity factor subunit 7 OS=Mus musculus OX=10090 GN=Cpsf7 PE=1 SV=2;sp|Q8BTV2-2|CPSF7_MOUSE Isoform 2 of Cleavage and polyadenylation specificity factor subunit 7 OS=Mus musculus OX=10090 GN=Cpsf7	Q8BTV2;Q8BTV2-2;Q8BTV2-3	Cleavage and polyadenylation specificity factor subunit 7	Cpsf7	1399	2131	4939	2231	7463	2809	3025	0	2660		5	5	12.7
	sp|P97742|CPT1A_MOUSE Carnitine O-palmitoyltransferase 1, liver isoform OS=Mus musculus OX=10090 GN=Cpt1a PE=1 SV=4	P97742	Carnitine O-palmitoyltransferase 1, liver isoform	Cpt1a	4015	724	2034	5218	1714	3121	4931	3143	4155		9	9	15.5
	sp|P52825|CPT2_MOUSE Carnitine O-palmitoyltransferase 2, mitochondrial OS=Mus musculus OX=10090 GN=Cpt2 PE=1 SV=2	P52825	Carnitine O-palmitoyltransferase 2, mitochondrial	Cpt2	1693	0	1675	0	0	1260	1647	1306	1291		3	3	6.2
	sp|Q64735-2|CR1L_MOUSE Isoform 2 of Complement component receptor 1-like protein OS=Mus musculus OX=10090 GN=Cr1l;sp|Q64735|CR1L_MOUSE Complement component receptor 1-like protein OS=Mus musculus OX=10090 GN=Cr1l PE=1 SV=1	Q64735-2;Q64735	Complement component receptor 1-like protein	Cr1l	3176	3874	4044	2441	0	0	7133	0	4479		5	5	13.4
	sp|O88843|CRADD_MOUSE Death domain-containing protein CRADD OS=Mus musculus OX=10090 GN=Cradd PE=1 SV=2	O88843	Death domain-containing protein CRADD	Cradd	5256	8156	4544	6647	0	8996	10418	8729	8309		3	3	32.2
	sp|Q8C7D2-2|CRBN_MOUSE Isoform 2 of Protein cereblon OS=Mus musculus OX=10090 GN=Crbn;sp|Q8C7D2-3|CRBN_MOUSE Isoform 3 of Protein cereblon OS=Mus musculus OX=10090 GN=Crbn;sp|Q8C7D2|CRBN_MOUSE Protein cereblon OS=Mus musculus OX=10090 GN=Crbn PE=1 SV=1	Q8C7D2-2;Q8C7D2-3;Q8C7D2	Protein cereblon	Crbn	1223	1435	2778	1357	1135	1179	0	1186	1483		1	1	4.2
	sp|Q01147-2|CREB1_MOUSE Isoform 2 of Cyclic AMP-responsive element-binding protein 1 OS=Mus musculus OX=10090 GN=Creb1;sp|Q01147|CREB1_MOUSE Cyclic AMP-responsive element-binding protein 1 OS=Mus musculus OX=10090 GN=Creb1 PE=1 SV=1	Q01147-2;Q01147;P27699-11;P27699-10;P27699-2;P27699-8;P27699-7;P27699-6;P27699-5;P81269	Cyclic AMP-responsive element-binding protein 1	Creb1	30612	14354	16822	16058	35400	33812	32518	31901	33813		5	5	18.3
	sp|O88668|CREG1_MOUSE Protein CREG1 OS=Mus musculus OX=10090 GN=Creg1 PE=1 SV=1	O88668	Protein CREG1	Creg1	4317	4340	0	3653	0	0	5782	0	3343		1	1	8.2
	sp|Q9CYA0|CREL2_MOUSE Cysteine-rich with EGF-like domain protein 2 OS=Mus musculus OX=10090 GN=Creld2 PE=1 SV=1	Q9CYA0	Cysteine-rich with EGF-like domain protein 2	Creld2	52031	47455	53644	8366	14405	14470	22176	26484	24710		7	7	24.6
	sp|P63254|CRIP1_MOUSE Cysteine-rich protein 1 OS=Mus musculus OX=10090 GN=Crip1 PE=1 SV=2	P63254	Cysteine-rich protein 1	Crip1	60007	18995	0	52050	56968	127671	44143	68667	0		1	1	19.5
	sp|Q64010-2|CRK_MOUSE Isoform Crk-I of Adapter molecule crk OS=Mus musculus OX=10090 GN=Crk;sp|Q64010|CRK_MOUSE Adapter molecule crk OS=Mus musculus OX=10090 GN=Crk PE=1 SV=1	Q64010-2;Q64010	Adapter molecule crk	Crk	3818	3562	3120	2629	1516	0	0	0	0		1	1	8.3
	sp|P47941|CRKL_MOUSE Crk-like protein OS=Mus musculus OX=10090 GN=Crkl PE=1 SV=2	P47941	Crk-like protein	Crkl	53438	49901	38998	42265	57790	60726	48909	63320	31111		9	9	42.2
	sp|Q9Z2L7-2|CRLF3_MOUSE Isoform 2 of Cytokine receptor-like factor 3 OS=Mus musculus OX=10090 GN=Crlf3;sp|Q9Z2L7|CRLF3_MOUSE Cytokine receptor-like factor 3 OS=Mus musculus OX=10090 GN=Crlf3 PE=1 SV=1	Q9Z2L7-2;Q9Z2L7	Cytokine receptor-like factor 3	Crlf3	37929	41083	52374	54221	23726	11489	43426	21147	13693		7	7	24.7
	sp|P97427|DPYL1_MOUSE Dihydropyrimidinase-related protein 1 OS=Mus musculus OX=10090 GN=Crmp1 PE=1 SV=1	P97427;O35098-2	Dihydropyrimidinase-related protein 1	Crmp1	11216	7481	10137	5393	7919	8214	7844	8113	2222		8	7	37.1
	sp|P63154|CRNL1_MOUSE Crooked neck-like protein 1 OS=Mus musculus OX=10090 GN=Crnkl1 PE=1 SV=1	P63154	Crooked neck-like protein 1	Crnkl1	6461	6956	9589	5022	5138	4330	13430	7270	5904		13	13	19.4
	sp|Q9DC50|OCTC_MOUSE Peroxisomal carnitine O-octanoyltransferase OS=Mus musculus OX=10090 GN=Crot PE=1 SV=1	Q9DC50	Peroxisomal carnitine O-octanoyltransferase	Crot	12369	10074	13689	11598	11209	8061	15572	8392	14985		12	12	28.3
	sp|Q9CZU6|CISY_MOUSE Citrate synthase, mitochondrial OS=Mus musculus OX=10090 GN=Cs PE=1 SV=1	Q9CZU6	Citrate synthase, mitochondrial	Cs	486228	454171	509305	439036	418715	412160	487026	472768	344412		20	20	49.6
	sp|Q91W50|CSDE1_MOUSE Cold shock domain-containing protein E1 OS=Mus musculus OX=10090 GN=Csde1 PE=1 SV=1	Q91W50	Cold shock domain-containing protein E1	Csde1	74368	88691	94302	50871	36451	40202	62098	57943	49582		29	29	39.5
	sp|Q9ERK4|XPO2_MOUSE Exportin-2 OS=Mus musculus OX=10090 GN=Cse1l PE=1 SV=1	Q9ERK4	Exportin-2	Cse1l	1900700	92551	136506	2011560	2323090	2039530	2083160	1836990	1684210		34	34	43.3
	sp|P41241|CSK_MOUSE Tyrosine-protein kinase CSK OS=Mus musculus OX=10090 GN=Csk PE=1 SV=2	P41241;P41242-3;P41242;P41242-2	Tyrosine-protein kinase CSK	Csk	101956	103865	147188	126411	98008	123807	128776	97907	134043		22	22	60.4
	sp|Q8BK63-2|KC1A_MOUSE Isoform 2 of Casein kinase I isoform alpha OS=Mus musculus OX=10090 GN=Csnk1a1;sp|Q8BK63|KC1A_MOUSE Casein kinase I isoform alpha OS=Mus musculus OX=10090 GN=Csnk1a1 PE=1 SV=2	Q8BK63-2;Q8BK63	Casein kinase I isoform alpha	Csnk1a1	42941	20641	26537	35581	21353	28015	40917	23998	38927		9	9	31.7
	sp|Q9DC28-2|KC1D_MOUSE Isoform 2 of Casein kinase I isoform delta OS=Mus musculus OX=10090 GN=Csnk1d;sp|Q9DC28|KC1D_MOUSE Casein kinase I isoform delta OS=Mus musculus OX=10090 GN=Csnk1d PE=1 SV=2	Q9DC28-2;Q9DC28;Q9JMK2	Casein kinase I isoform delta	Csnk1d	747	2354	1676	1465	0	1519	1579	1368	0		3	3	14.4
	sp|Q8BTH8|KC1G1_MOUSE Casein kinase I isoform gamma-1 OS=Mus musculus OX=10090 GN=Csnk1g1 PE=1 SV=2	Q8BTH8	Casein kinase I isoform gamma-1	Csnk1g1	0	815	1748	1304	1002	923	3037	649	975		2	1	4.6
	sp|Q60737|CSK21_MOUSE Casein kinase II subunit alpha OS=Mus musculus OX=10090 GN=Csnk2a1 PE=1 SV=2	Q60737	Casein kinase II subunit alpha	Csnk2a1	164039	125847	122576	94751	107374	105342	137972	136079	124497		13	13	43.5
	sp|O54833|CSK22_MOUSE Casein kinase II subunit alpha OS=Mus musculus OX=10090 GN=Csnk2a2 PE=1 SV=1	O54833	Casein kinase II subunit alpha	Csnk2a2	30289	28871	47256	40205	30428	33238	36149	34713	27865		10	10	35.1
	sp|P67871|CSK2B_MOUSE Casein kinase II subunit beta OS=Mus musculus OX=10090 GN=Csnk2b PE=1 SV=1	P67871	Casein kinase II subunit beta	Csnk2b	42203	64543	99828	58905	57614	156088	94720	117842	82216		7	7	45.6
	sp|Q99388|CSPRS_MOUSE Component of Sp100-rs OS=Mus musculus OX=10090 GN=Csprs PE=2 SV=1	Q99388	Component of Sp100-rs	Csprs	6544	0	0	11937	7123	0	9697	0	5973		2	2	16.8
	sp|P97315|CSRP1_MOUSE Cysteine and glycine-rich protein 1 OS=Mus musculus OX=10090 GN=Csrp1 PE=1 SV=3	P97315	Cysteine and glycine-rich protein 1	Csrp1	116928	121560	131441	121877	157252	86302	108731	95075	99106		7	7	48.2
	sp|O89098|CYTF_MOUSE Cystatin-F OS=Mus musculus OX=10090 GN=Cst7 PE=2 SV=1	O89098	Cystatin-F	Cst7	0	0	0	10063	27778	11029	12397	11576	21893		2	2	17.4
	sp|Q99LC2|CSTF1_MOUSE Cleavage stimulation factor subunit 1 OS=Mus musculus OX=10090 GN=Cstf1 PE=1 SV=1	Q99LC2	Cleavage stimulation factor subunit 1	Cstf1	33264	25905	26412	14232	18090	23753	21905	26236	20286		10	10	38.1
	sp|Q8BIQ5-2|CSTF2_MOUSE Isoform 2 of Cleavage stimulation factor subunit 2 OS=Mus musculus OX=10090 GN=Cstf2;sp|Q8BIQ5|CSTF2_MOUSE Cleavage stimulation factor subunit 2 OS=Mus musculus OX=10090 GN=Cstf2 PE=1 SV=2	Q8BIQ5-2;Q8BIQ5	Cleavage stimulation factor subunit 2	Cstf2	1185	1358	1284	863	801	21108	0	9326	2260		5	2	12.7
	sp|Q99LI7|CSTF3_MOUSE Cleavage stimulation factor subunit 3 OS=Mus musculus OX=10090 GN=Cstf3 PE=1 SV=1	Q99LI7	Cleavage stimulation factor subunit 3	Cstf3	13386	10060	9589	5210	5547	10109	11939	7598	13755		12	12	21.5
	sp|O88712-2|CTBP1_MOUSE Isoform 2 of C-terminal-binding protein 1 OS=Mus musculus OX=10090 GN=Ctbp1;sp|O88712|CTBP1_MOUSE C-terminal-binding protein 1 OS=Mus musculus OX=10090 GN=Ctbp1 PE=1 SV=2;sp|O88712-3|CTBP1_MOUSE Isoform 3 of C-terminal-binding prote	O88712-2;O88712;O88712-3;P56546	C-terminal-binding protein 1	Ctbp1	8576	6674	13288	16184	15247	3602	32959	18395	15340		8	7	27
	sp|Q5SUQ9-2|CTC1_MOUSE Isoform 2 of CST complex subunit CTC1 OS=Mus musculus OX=10090 GN=Ctc1;sp|Q5SUQ9-3|CTC1_MOUSE Isoform 3 of CST complex subunit CTC1 OS=Mus musculus OX=10090 GN=Ctc1;sp|Q5SUQ9|CTC1_MOUSE CST complex subunit CTC1 OS=Mus musculus OX=100	Q5SUQ9-2;Q5SUQ9-3;Q5SUQ9	CST complex subunit CTC1	Ctc1	8681	7307	1550	1397	2102	8535	8436	2512	1315		5	5	5.9
	sp|Q61164|CTCF_MOUSE Transcriptional repressor CTCF OS=Mus musculus OX=10090 GN=Ctcf PE=1 SV=2	Q61164	Transcriptional repressor CTCF	Ctcf	15200	20216	14598	18870	12532	14357	21943	12017	12920		9	9	17.3
	sp|Q7TSG2|CTDP1_MOUSE RNA polymerase II subunit A C-terminal domain phosphatase OS=Mus musculus OX=10090 GN=Ctdp1 PE=1 SV=1	Q7TSG2;Q7TSG2-2	RNA polymerase II subunit A C-terminal domain phosphatase	Ctdp1	3335	1557	2494	1678	3027	3074	4458	4599	4145		11	11	18.8
	sp|Q8BG15-6|CTSL2_MOUSE Isoform 6 of CTD small phosphatase-like protein 2 OS=Mus musculus OX=10090 GN=Ctdspl2;sp|Q8BG15-2|CTSL2_MOUSE Isoform 2 of CTD small phosphatase-like protein 2 OS=Mus musculus OX=10090 GN=Ctdspl2;sp|Q8BG15|CTSL2_MOUSE CTD small phos	Q8BG15-6;Q8BG15-2;Q8BG15;Q8BG15-5;Q8BG15-3;Q8BG15-4	CTD small phosphatase-like protein 2	Ctdspl2	22274	8240	2203	8652	9617	15216	21107	16459	4414		8	8	18.8
	sp|Q9CWL8|CTBL1_MOUSE Beta-catenin-like protein 1 OS=Mus musculus OX=10090 GN=Ctnnbl1 PE=1 SV=1	Q9CWL8	Beta-catenin-like protein 1	Ctnnbl1	12978	15393	32430	35724	26002	25746	21159	10588	25527		13	13	27.4
	sp|P70698|PYRG1_MOUSE CTP synthase 1 OS=Mus musculus OX=10090 GN=Ctps1 PE=1 SV=2	P70698	CTP synthase 1	Ctps1	64092	85197	114804	69938	69538	83268	61468	60696	79835		22	20	53.3
	sp|P70303|PYRG2_MOUSE CTP synthase 2 OS=Mus musculus OX=10090 GN=Ctps2 PE=1 SV=1;sp|P70303-3|PYRG2_MOUSE Isoform 3 of CTP synthase 2 OS=Mus musculus OX=10090 GN=Ctps2;sp|P70303-2|PYRG2_MOUSE Isoform 2 of CTP synthase 2 OS=Mus musculus OX=10090 GN=Ctps2	P70303;P70303-3;P70303-2	CTP synthase 2	Ctps2	17179	13961	16869	20392	10169	11001	22111	9414	11779		10	10	30.2
	sp|Q62018|CTR9_MOUSE RNA polymerase-associated protein CTR9 homolog OS=Mus musculus OX=10090 GN=Ctr9 PE=1 SV=2;sp|Q62018-3|CTR9_MOUSE Isoform 3 of RNA polymerase-associated protein CTR9 homolog OS=Mus musculus OX=10090 GN=Ctr9;sp|Q62018-2|CTR9_MOUSE Isofor	Q62018;Q62018-3;Q62018-2	RNA polymerase-associated protein CTR9 homolog	Ctr9	2521	2310	1663	1156	1197	1185	1433	3871	1654		8	8	8.8
	sp|Q3SYP2|CTRC_MOUSE Chymotrypsin-C OS=Mus musculus OX=10090 GN=Ctrc PE=1 SV=1	Q3SYP2	Chymotrypsin-C	Ctrc	56003	38684	70480	31009	33898	27824	28081	27141	42962		1	1	3.4
	sp|P16675|PPGB_MOUSE Lysosomal protective protein OS=Mus musculus OX=10090 GN=Ctsa PE=1 SV=1	P16675	Lysosomal protective protein;Lysosomal protective protein 32 kDa chain;Lysosomal protective protein 20 kDa chain	Ctsa	5443	10987	12232	14634	19854	36753	16650	16768	3945		6	6	15.8
	sp|P10605|CATB_MOUSE Cathepsin B OS=Mus musculus OX=10090 GN=Ctsb PE=1 SV=2	P10605	Cathepsin B;Cathepsin B light chain;Cathepsin B heavy chain	Ctsb	56389	33245	64633	40141	27934	45064	42629	38193	41275		7	7	23.3
	sp|P97821|CATC_MOUSE Dipeptidyl peptidase 1 OS=Mus musculus OX=10090 GN=Ctsc PE=1 SV=1	P97821	Dipeptidyl peptidase 1;Dipeptidyl peptidase 1 exclusion domain chain;Dipeptidyl peptidase 1 heavy chain;Dipeptidyl peptidase 1 light chain	Ctsc	8724	6635	10393	6047	7178	16762	8724	11788	7409		5	5	13.9
	sp|P18242|CATD_MOUSE Cathepsin D OS=Mus musculus OX=10090 GN=Ctsd PE=1 SV=1	P18242	Cathepsin D	Ctsd	531697	433172	694321	505034	424277	607803	650053	521880	551807		14	14	45.6
	sp|O70370|CATS_MOUSE Cathepsin S OS=Mus musculus OX=10090 GN=Ctss PE=1 SV=2	O70370	Cathepsin S	Ctss	11128	14588	20656	20649	19361	20841	24374	25772	13632		5	5	25.3
	sp|P56203|CATW_MOUSE Cathepsin W OS=Mus musculus OX=10090 GN=Ctsw PE=2 SV=2	P56203	Cathepsin W	Ctsw	13194	20818	48905	12404	4000	21350	4884	10029	13963		9	9	28
	sp|Q9WUU7|CATZ_MOUSE Cathepsin Z OS=Mus musculus OX=10090 GN=Ctsz PE=1 SV=1	Q9WUU7	Cathepsin Z	Ctsz	32814	27301	52785	26833	30010	30129	42640	21876	30567		7	7	28.1
	sp|Q3U308|CTU2_MOUSE Cytoplasmic tRNA 2-thiolation protein 2 OS=Mus musculus OX=10090 GN=Ctu2 PE=1 SV=1	Q3U308	Cytoplasmic tRNA 2-thiolation protein 2	Ctu2	2546	2237	2594	3333	1855	4372	4170	4303	2158		3	3	7.6
	sp|Q9WTX6|CUL1_MOUSE Cullin-1 OS=Mus musculus OX=10090 GN=Cul1 PE=1 SV=1	Q9WTX6	Cullin-1	Cul1	18116	19865	34439	25735	14819	16172	27348	16690	16141		21	21	32.6
	sp|Q9D4H8|CUL2_MOUSE Cullin-2 OS=Mus musculus OX=10090 GN=Cul2 PE=1 SV=2;sp|Q9D4H8-2|CUL2_MOUSE Isoform 2 of Cullin-2 OS=Mus musculus OX=10090 GN=Cul2	Q9D4H8;Q9D4H8-2	Cullin-2	Cul2	19140	11370	27046	31774	14737	14287	17696	15596	12602		17	17	29.4
	sp|Q9JLV5|CUL3_MOUSE Cullin-3 OS=Mus musculus OX=10090 GN=Cul3 PE=1 SV=1	Q9JLV5	Cullin-3	Cul3	33162	20697	23192	24194	17362	17965	25324	11789	23985		22	22	32.7
	sp|Q3TCH7|CUL4A_MOUSE Cullin-4A OS=Mus musculus OX=10090 GN=Cul4a PE=1 SV=1	Q3TCH7	Cullin-4A	Cul4a	1249	935	3490	896	520	2532	2268	489	1648		7	7	18.7
	sp|A2A432-2|CUL4B_MOUSE Isoform 2 of Cullin-4B OS=Mus musculus OX=10090 GN=Cul4b;sp|A2A432|CUL4B_MOUSE Cullin-4B OS=Mus musculus OX=10090 GN=Cul4b PE=1 SV=1	A2A432-2;A2A432	Cullin-4B	Cul4b	18837	15032	27889	18328	13742	17568	19437	17255	12831		20	17	27.1
	sp|Q9D5V5|CUL5_MOUSE Cullin-5 OS=Mus musculus OX=10090 GN=Cul5 PE=1 SV=3	Q9D5V5	Cullin-5	Cul5	13075	5249	13613	9602	8836	13892	13262	4490	7937		17	17	24.4
	sp|Q9JHS9|CWC15_MOUSE Spliceosome-associated protein CWC15 homolog OS=Mus musculus OX=10090 GN=Cwc15 PE=1 SV=1	Q9JHS9	Spliceosome-associated protein CWC15 homolog	Cwc15	27583	22027	29157	16050	9277	37931	12819	9163	0		5	5	22.3
	sp|Q8C5N3-2|CWC22_MOUSE Isoform 2 of Pre-mRNA-splicing factor CWC22 homolog OS=Mus musculus OX=10090 GN=Cwc22;sp|Q8C5N3|CWC22_MOUSE Pre-mRNA-splicing factor CWC22 homolog OS=Mus musculus OX=10090 GN=Cwc22 PE=1 SV=1	Q8C5N3-2;Q8C5N3	Pre-mRNA-splicing factor CWC22 homolog	Cwc22	31231	5830	4401	6329	4411	5305	6872	6675	2441		11	11	15.1
	sp|Q3TKY6|CWC27_MOUSE Spliceosome-associated protein CWC27 homolog OS=Mus musculus OX=10090 GN=Cwc27 PE=1 SV=1	Q3TKY6	Peptidyl-prolyl cis-trans isomerase CWC27 homolog	Cwc27	4141	0	2828	3564	3844	4108	4258	4255	2716		4	4	18.8
	sp|Q8CI33|C19L1_MOUSE CWF19-like protein 1 OS=Mus musculus OX=10090 GN=Cwf19l1 PE=1 SV=2;sp|Q8CI33-2|C19L1_MOUSE Isoform 2 of CWF19-like protein 1 OS=Mus musculus OX=10090 GN=Cwf19l1	Q8CI33;Q8CI33-2	CWF19-like protein 1	Cwf19l1	3707	1406	4648	3246	1824	1274	6166	2979	3858		4	4	12.8
	sp|Q9CWW7|CXXC1_MOUSE CXXC-type zinc finger protein 1 OS=Mus musculus OX=10090 GN=Cxxc1 PE=2 SV=1	Q9CWW7	CXXC-type zinc finger protein 1	Cxxc1	0	0	0	0	1228	1263	1577	0	886		3	3	7.6
	sp|P56395|CYB5_MOUSE Cytochrome b5 OS=Mus musculus OX=10090 GN=Cyb5a PE=1 SV=2	P56395	Cytochrome b5	Cyb5a	8862	39987	51081	22954	24569	96053	25402	72906	28615		5	5	42.5
	sp|Q9CQX2|CYB5B_MOUSE Cytochrome b5 type B OS=Mus musculus OX=10090 GN=Cyb5b PE=1 SV=1	Q9CQX2	Cytochrome b5 type B	Cyb5b	24226	83021	151000	72733	43546	135956	82943	123540	31658		6	6	55.5
	sp|Q9DCN2-2|NB5R3_MOUSE Isoform 2 of NADH-cytochrome b5 reductase 3 OS=Mus musculus OX=10090 GN=Cyb5r3;sp|Q9DCN2|NB5R3_MOUSE NADH-cytochrome b5 reductase 3 OS=Mus musculus OX=10090 GN=Cyb5r3 PE=1 SV=3	Q9DCN2-2;Q9DCN2	NADH-cytochrome b5 reductase 3;NADH-cytochrome b5 reductase 3 membrane-bound form;NADH-cytochrome b5 reductase 3 soluble form	Cyb5r3	34862	25007	67298	62409	45089	38412	37506	41233	28828		9	9	48.9
	sp|Q61462-2|CY24A_MOUSE Isoform 2 of Cytochrome b-245 light chain OS=Mus musculus OX=10090 GN=Cyba;sp|Q61462|CY24A_MOUSE Cytochrome b-245 light chain OS=Mus musculus OX=10090 GN=Cyba PE=1 SV=3	Q61462-2;Q61462	Cytochrome b-245 light chain	Cyba	22775	37390	0	0	0	24264	47783	0	22918		2	2	15.2
	sp|Q9D0M3-2|CY1_MOUSE Isoform 2 of Cytochrome c1, heme protein, mitochondrial OS=Mus musculus OX=10090 GN=Cyc1;sp|Q9D0M3|CY1_MOUSE Cytochrome c1, heme protein, mitochondrial OS=Mus musculus OX=10090 GN=Cyc1 PE=1 SV=1	Q9D0M3-2;Q9D0M3	Cytochrome c1, heme protein, mitochondrial	Cyc1	38670	69480	112094	98753	85481	168470	76522	63434	68968		8	8	37.6
	sp|P62897|CYC_MOUSE Cytochrome c, somatic OS=Mus musculus OX=10090 GN=Cycs PE=1 SV=2	P62897;CON__P62894;P00015	Cytochrome c, somatic	Cycs	269472	283518	447097	339179	351323	354714	381915	335372	366875		8	8	59
	sp|Q5SQX6|CYFP2_MOUSE Cytoplasmic FMR1-interacting protein 2 OS=Mus musculus OX=10090 GN=Cyfip2 PE=1 SV=2	Q5SQX6	Cytoplasmic FMR1-interacting protein 2	Cyfip2	49311	41880	58005	50180	45243	40780	51806	45609	44993		37	22	37.4
	sp|Q8BKE6|CP20A_MOUSE Cytochrome P450 20A1 OS=Mus musculus OX=10090 GN=Cyp20a1 PE=1 SV=1	Q8BKE6	Cytochrome P450 20A1	Cyp20a1	2509	10323	2920	5050	11655	11660	9646	11149	4850		6	6	17.3
	sp|Q8K0C4|CP51A_MOUSE Lanosterol 14-alpha demethylase OS=Mus musculus OX=10090 GN=Cyp51a1 PE=1 SV=1	Q8K0C4	Lanosterol 14-alpha demethylase	Cyp51a1	38909	35794	48476	42000	25500	25687	38046	38670	34639		15	15	40.2
	sp|Q9QX11-2|CYH1_MOUSE Isoform 2 of Cytohesin-1 OS=Mus musculus OX=10090 GN=Cyth1;sp|Q9QX11|CYH1_MOUSE Cytohesin-1 OS=Mus musculus OX=10090 GN=Cyth1 PE=1 SV=2	Q9QX11-2;Q9QX11	Cytohesin-1	Cyth1	0	2759	0	1732	8479	1870	2963	7224	0		7	4	20.7
	sp|Q80YW0|CYH4_MOUSE Cytohesin-4 OS=Mus musculus OX=10090 GN=Cyth4 PE=1 SV=1	Q80YW0;REV__B9EKI3	Cytohesin-4	Cyth4	11533	4009	12666	11016	8740	8968	8937	7269	4270		10	10	31.3
	sp|Q91VY6|CYTIP_MOUSE Cytohesin-interacting protein OS=Mus musculus OX=10090 GN=Cytip PE=1 SV=1	Q91VY6	Cytohesin-interacting protein	Cytip	7083	4185	3978	5547	3900	0	8664	5787	5706		3	3	15.6
	sp|Q9D172|GAL3A_MOUSE Glutamine amidotransferase-like class 1 domain-containing protein 3A, mitochondrial OS=Mus musculus OX=10090 GN=Gatd3a PE=1 SV=1	Q9D172	ES1 protein homolog, mitochondrial	D10Jhu81e	49830	23780	14826	30559	3634	15121	49738	32219	5864		5	5	36.5
	sp|Q8CIM3|D2HDH_MOUSE D-2-hydroxyglutarate dehydrogenase, mitochondrial OS=Mus musculus OX=10090 GN=D2hgdh PE=1 SV=3	Q8CIM3	D-2-hydroxyglutarate dehydrogenase, mitochondrial	D2hgdh	0	1436	0	2848	940	0	1837	2220	2225		3	3	10.8
	sp|Q3UHX9-2|CI114_MOUSE Isoform 2 of Putative methyltransferase C9orf114 homolog OS=Mus musculus OX=10090 GN=Spout1;sp|Q3UHX9|CI114_MOUSE Putative methyltransferase C9orf114 homolog OS=Mus musculus OX=10090 GN=Spout1 PE=1 SV=1	Q3UHX9-2;Q3UHX9	Putative methyltransferase C9orf114 homolog	D2Wsu81e	5261	4398	0	8604	0	7167	0	2537	5860		2	2	10.7
	sp|P61804|DAD1_MOUSE Dolichyl-diphosphooligosaccharide--protein glycosyltransferase subunit DAD1 OS=Mus musculus OX=10090 GN=Dad1 PE=1 SV=3	P61804	Dolichyl-diphosphooligosaccharide--protein glycosyltransferase subunit DAD1	Dad1	84230	0	0	0	16680	28155	32868	28456	28631		2	2	19.5
	sp|Q8VC30|TKFC_MOUSE Triokinase/FMN cyclase OS=Mus musculus OX=10090 GN=Tkfc PE=1 SV=1	Q8VC30	Bifunctional ATP-dependent dihydroxyacetone kinase/FAD-AMP lyase (cyclizing);ATP-dependent dihydroxyacetone kinase;FAD-AMP lyase (cyclizing)	Dak	5740	5210	14505	8534	3670	11023	21467	2874	5882		8	8	24.2
	sp|Q9ER88|RT29_MOUSE 28S ribosomal protein S29, mitochondrial OS=Mus musculus OX=10090 GN=Dap3 PE=1 SV=1;sp|Q9ER88-2|RT29_MOUSE Isoform 2 of 28S ribosomal protein S29, mitochondrial OS=Mus musculus OX=10090 GN=Dap3	Q9ER88;Q9ER88-2	28S ribosomal protein S29, mitochondrial	Dap3	21927	25302	27717	26500	18632	22497	27821	25509	25497		9	9	25.1
	sp|Q922B2|SYDC_MOUSE Aspartate--tRNA ligase, cytoplasmic OS=Mus musculus OX=10090 GN=Dars PE=1 SV=2	Q922B2	Aspartate--tRNA ligase, cytoplasmic	Dars	501207	439545	530043	510472	427250	457345	604816	380153	419543		39	39	75.6
	sp|O35613|DAXX_MOUSE Death domain-associated protein 6 OS=Mus musculus OX=10090 GN=Daxx PE=1 SV=1	O35613	Death domain-associated protein 6	Daxx	1056	0	596	959	0	819	1650	0	964		2	2	3
	sp|Q9JII5-2|DAZP1_MOUSE Isoform 2 of DAZ-associated protein 1 OS=Mus musculus OX=10090 GN=Dazap1;sp|Q9JII5|DAZP1_MOUSE DAZ-associated protein 1 OS=Mus musculus OX=10090 GN=Dazap1 PE=1 SV=2	Q9JII5-2;Q9JII5	DAZ-associated protein 1	Dazap1	160513	132265	164758	150109	120138	131650	138545	126802	147899		8	8	34.3
	sp|Q62418-3|DBNL_MOUSE Isoform 3 of Drebrin-like protein OS=Mus musculus OX=10090 GN=Dbnl;sp|Q62418-2|DBNL_MOUSE Isoform 2 of Drebrin-like protein OS=Mus musculus OX=10090 GN=Dbnl;sp|Q62418|DBNL_MOUSE Drebrin-like protein OS=Mus musculus OX=10090 GN=Dbnl P	Q62418-3;Q62418-2;Q62418	Drebrin-like protein	Dbnl	108634	110423	166902	107098	105120	67297	114651	71387	97100		16	16	45.6
	sp|Q923B1|DBR1_MOUSE Lariat debranching enzyme OS=Mus musculus OX=10090 GN=Dbr1 PE=1 SV=2	Q923B1	Lariat debranching enzyme	Dbr1	1399	0	4164	2831	1448	0	8973	6335	1403		6	6	13.8
	sp|P53395|ODB2_MOUSE Lipoamide acyltransferase component of branched-chain alpha-keto acid dehydrogenase complex, mitochondrial OS=Mus musculus OX=10090 GN=Dbt PE=1 SV=2	P53395	Lipoamide acyltransferase component of branched-chain alpha-keto acid dehydrogenase complex, mitochondrial	Dbt	12357	7536	17261	14110	8485	15983	7794	9249	8766		8	8	23.4
	sp|Q6PAC3|DCA13_MOUSE DDB1- and CUL4-associated factor 13 OS=Mus musculus OX=10090 GN=Dcaf13 PE=2 SV=2	Q6PAC3	DDB1- and CUL4-associated factor 13	Dcaf13	6218	15199	14258	16619	16642	1052	12651	7908	21692		10	10	29.2
	sp|Q8N7N5|DCAF8_MOUSE DDB1- and CUL4-associated factor 8 OS=Mus musculus OX=10090 GN=Dcaf8 PE=1 SV=1;sp|Q8N7N5-2|DCAF8_MOUSE Isoform 2 of DDB1- and CUL4-associated factor 8 OS=Mus musculus OX=10090 GN=Dcaf8	Q8N7N5;Q8N7N5-2	DDB1- and CUL4-associated factor 8	Dcaf8	3578	2749	3023	2978	3932	4541	12924	10357	13321		6	6	14
	sp|P43346|DCK_MOUSE Deoxycytidine kinase OS=Mus musculus OX=10090 GN=Dck PE=1 SV=1	P43346	Deoxycytidine kinase	Dck	11835	9155	4948	2979	17203	5988	5366	15892	11044		4	4	17.3
	sp|Q91YD3|DCP1A_MOUSE mRNA-decapping enzyme 1A OS=Mus musculus OX=10090 GN=Dcp1a PE=1 SV=1	Q91YD3	mRNA-decapping enzyme 1A	Dcp1a	10357	2795	11022	8056	6903	9844	3907	10079	7644		11	11	28.9
	sp|Q9CYC6|DCP2_MOUSE m7GpppN-mRNA hydrolase OS=Mus musculus OX=10090 GN=Dcp2 PE=1 SV=2	Q9CYC6	m7GpppN-mRNA hydrolase	Dcp2	1580	1932	0	1753	1455	0	0	0	2195		1	1	4.3
	sp|Q9DAR7|DCPS_MOUSE m7GpppX diphosphatase OS=Mus musculus OX=10090 GN=Dcps PE=1 SV=1	Q9DAR7	m7GpppX diphosphatase	Dcps	149324	166162	204378	180519	195285	179147	213828	181086	180776		20	20	60.9
	sp|O08788-2|DCTN1_MOUSE Isoform 2 of Dynactin subunit 1 OS=Mus musculus OX=10090 GN=Dctn1;sp|O08788|DCTN1_MOUSE Dynactin subunit 1 OS=Mus musculus OX=10090 GN=Dctn1 PE=1 SV=3	O08788-2;O08788	Dynactin subunit 1	Dctn1	13749	11207	21181	15291	13596	12779	16341	13655	12262		23	23	28.2
	sp|Q99KJ8|DCTN2_MOUSE Dynactin subunit 2 OS=Mus musculus OX=10090 GN=Dctn2 PE=1 SV=3	Q99KJ8	Dynactin subunit 2	Dctn2	19949	31357	40594	26749	19785	55654	43168	59367	30229		14	14	51.7
	sp|Q9Z0Y1|DCTN3_MOUSE Dynactin subunit 3 OS=Mus musculus OX=10090 GN=Dctn3 PE=1 SV=2	Q9Z0Y1	Dynactin subunit 3	Dctn3	25052	11525	85181	26759	11588	20391	107299	23793	20863		6	6	37.6
	sp|Q8CBY8-2|DCTN4_MOUSE Isoform 2 of Dynactin subunit 4 OS=Mus musculus OX=10090 GN=Dctn4;sp|Q8CBY8|DCTN4_MOUSE Dynactin subunit 4 OS=Mus musculus OX=10090 GN=Dctn4 PE=1 SV=1	Q8CBY8-2;Q8CBY8	Dynactin subunit 4	Dctn4	3282	4613	5341	3539	8329	4283	3302	3799	3574		6	6	24.1
	sp|Q9WUB4|DCTN6_MOUSE Dynactin subunit 6 OS=Mus musculus OX=10090 GN=Dctn6 PE=1 SV=1	Q9WUB4	Dynactin subunit 6	Dctn6	8385	0	14451	8215	5200	7296	10359	0	8160		2	2	14.7
	sp|Q9QZ73|DCNL1_MOUSE DCN1-like protein 1 OS=Mus musculus OX=10090 GN=Dcun1d1 PE=2 SV=1	Q9QZ73;Q8BZJ7-4;Q8BZJ7-2;Q8BZJ7	DCN1-like protein 1	Dcun1d1	37726	34789	23173	21173	26566	26527	19230	30826	33029		6	6	24.7
	sp|Q9CXV9|DCNL5_MOUSE DCN1-like protein 5 OS=Mus musculus OX=10090 GN=Dcun1d5 PE=1 SV=1	Q9CXV9	DCN1-like protein 5	Dcun1d5	8720	3802	0	5941	2331	863	1133	2583	2927		4	3	15.6
	sp|Q3U1J4|DDB1_MOUSE DNA damage-binding protein 1 OS=Mus musculus OX=10090 GN=Ddb1 PE=1 SV=2	Q3U1J4	DNA damage-binding protein 1	Ddb1	90223	76571	103008	70623	62715	74189	89682	77312	59888		39	39	39.8
	sp|A2ADY9|DDI2_MOUSE Protein DDI1 homolog 2 OS=Mus musculus OX=10090 GN=Ddi2 PE=1 SV=1	A2ADY9	Protein DDI1 homolog 2	Ddi2	11585	14812	25038	18092	11061	34509	18744	30263	7832		7	7	30.6
	sp|O54734|OST48_MOUSE Dolichyl-diphosphooligosaccharide--protein glycosyltransferase 48 kDa subunit OS=Mus musculus OX=10090 GN=Ddost PE=1 SV=2	O54734	Dolichyl-diphosphooligosaccharide--protein glycosyltransferase 48 kDa subunit	Ddost	266314	229020	384291	281393	157191	205073	304883	233492	223676		18	18	51.7
	sp|Q80WW9|DDRGK_MOUSE DDRGK domain-containing protein 1 OS=Mus musculus OX=10090 GN=Ddrgk1 PE=1 SV=2	Q80WW9	DDRGK domain-containing protein 1	Ddrgk1	0	0	0	7374	0	4698	0	5277	3395		1	1	6
	sp|O35215|DOPD_MOUSE D-dopachrome decarboxylase OS=Mus musculus OX=10090 GN=Ddt PE=1 SV=3	O35215	D-dopachrome decarboxylase	Ddt	9165	9820	48181	0	3622	31218	15408	0	0		5	5	59.3
	sp|Q91VR5|DDX1_MOUSE ATP-dependent RNA helicase DDX1 OS=Mus musculus OX=10090 GN=Ddx1 PE=1 SV=1	Q91VR5	ATP-dependent RNA helicase DDX1	Ddx1	99455	98475	125189	97987	78084	74303	117659	101179	109411		30	30	45
	sp|Q80Y44|DDX10_MOUSE Probable ATP-dependent RNA helicase DDX10 OS=Mus musculus OX=10090 GN=Ddx10 PE=1 SV=2	Q80Y44	Probable ATP-dependent RNA helicase DDX10	Ddx10	3379	213	1850	1267	1299	0	0	2011	2002		4	4	5
	sp|Q501J6|DDX17_MOUSE Probable ATP-dependent RNA helicase DDX17 OS=Mus musculus OX=10090 GN=Ddx17 PE=1 SV=1;sp|Q501J6-2|DDX17_MOUSE Isoform 2 of Probable ATP-dependent RNA helicase DDX17 OS=Mus musculus OX=10090 GN=Ddx17	Q501J6;Q501J6-2	Probable ATP-dependent RNA helicase DDX17	Ddx17	112430	117948	146793	124930	92849	106522	112034	101920	89868		22	22	47.7
	sp|Q8K363|DDX18_MOUSE ATP-dependent RNA helicase DDX18 OS=Mus musculus OX=10090 GN=Ddx18 PE=1 SV=1	Q8K363	ATP-dependent RNA helicase DDX18	Ddx18	101501	55197	80322	47099	51294	46314	96439	78253	45750		25	25	48.9
	sp|Q61655|DD19A_MOUSE ATP-dependent RNA helicase DDX19A OS=Mus musculus OX=10090 GN=Ddx19a PE=1 SV=2	Q61655;Q9QY15;Q9QY15-2	ATP-dependent RNA helicase DDX19A	Ddx19a	44357	96001	137029	64868	62651	47350	34788	40060	78009		24	5	65.1
	sp|Q9JJY4|DDX20_MOUSE Probable ATP-dependent RNA helicase DDX20 OS=Mus musculus OX=10090 GN=Ddx20 PE=1 SV=2	Q9JJY4	Probable ATP-dependent RNA helicase DDX20	Ddx20	8600	5079	9594	3852	9184	5523	9547	4814	4980		9	9	17.8
	sp|Q9JIK5|DDX21_MOUSE Nucleolar RNA helicase 2 OS=Mus musculus OX=10090 GN=Ddx21 PE=1 SV=3	Q9JIK5	Nucleolar RNA helicase 2	Ddx21	542793	468195	443789	359470	305627	326201	436879	417956	393792		52	52	59.9
	tr|D3Z0M9|D3Z0M9_MOUSE DEAD (Asp-Glu-Ala-Asp) box polypeptide 23 OS=Mus musculus OX=10090 GN=Ddx23 PE=1 SV=1	D3Z0M9		Ddx23	23578	20104	20146	18698	18016	10507	10688	18487	19348		22	22	32.2
	sp|Q9ESV0|DDX24_MOUSE ATP-dependent RNA helicase DDX24 OS=Mus musculus OX=10090 GN=Ddx24 PE=1 SV=2	Q9ESV0	ATP-dependent RNA helicase DDX24	Ddx24	4687	10542	3070	0	1804	0	4817	5454	1657		14	14	20.2
	sp|Q921N6|DDX27_MOUSE Probable ATP-dependent RNA helicase DDX27 OS=Mus musculus OX=10090 GN=Ddx27 PE=1 SV=3	Q921N6;Q921N6-2	Probable ATP-dependent RNA helicase DDX27	Ddx27	35555	27537	45191	15083	9447	13518	27902	17490	9814		13	13	21.4
	sp|Q6NZQ2|DDX31_MOUSE Probable ATP-dependent RNA helicase DDX31 OS=Mus musculus OX=10090 GN=Ddx31 PE=2 SV=2	Q6NZQ2		Ddx31	0	1155	1426	919	0	0	0	631	1511		5	5	11.1
	sp|Q8VDW0|DX39A_MOUSE ATP-dependent RNA helicase DDX39A OS=Mus musculus OX=10090 GN=Ddx39a PE=1 SV=1	Q8VDW0;Q8VDW0-2	ATP-dependent RNA helicase DDX39A	Ddx39a	598385	636405	639599	535561	380330	479575	684400	508907	544979		24	12	64.6
	sp|Q9Z1N5|DX39B_MOUSE Spliceosome RNA helicase Ddx39b OS=Mus musculus OX=10090 GN=Ddx39b PE=1 SV=1	Q9Z1N5	Spliceosome RNA helicase Ddx39b	Ddx39b	200638	158018	191517	156149	134823	151755	225238	166797	130594		11	11	65.7
	sp|Q62167|DDX3X_MOUSE ATP-dependent RNA helicase DDX3X OS=Mus musculus OX=10090 GN=Ddx3x PE=1 SV=3;sp|P16381|DDX3L_MOUSE Putative ATP-dependent RNA helicase Pl10 OS=Mus musculus OX=10090 GN=D1Pas1 PE=1 SV=1	Q62167;P16381	ATP-dependent RNA helicase DDX3X;Putative ATP-dependent RNA helicase Pl10	Ddx3x;D1Pas1	356890	390876	460842	310693	229876	206539	291063	254138	315188		36	8	57.6
	sp|Q62095|DDX3Y_MOUSE ATP-dependent RNA helicase DDX3Y OS=Mus musculus OX=10090 GN=Ddx3y PE=1 SV=2	Q62095;Q61496	ATP-dependent RNA helicase DDX3Y	Ddx3y	35646	34895	34279	22713	16686	20949	28607	24443	23087		4	4	42.4
	sp|Q91VN6|DDX41_MOUSE Probable ATP-dependent RNA helicase DDX41 OS=Mus musculus OX=10090 GN=Ddx41 PE=1 SV=2	Q91VN6	Probable ATP-dependent RNA helicase DDX41	Ddx41	3112	3484	7537	12084	1803	10340	12705	5460	8973		6	6	14.1
	sp|Q810A7|DDX42_MOUSE ATP-dependent RNA helicase DDX42 OS=Mus musculus OX=10090 GN=Ddx42 PE=1 SV=3;sp|Q810A7-2|DDX42_MOUSE Isoform 2 of ATP-dependent RNA helicase DDX42 OS=Mus musculus OX=10090 GN=Ddx42	Q810A7;Q810A7-2	ATP-dependent RNA helicase DDX42	Ddx42	33024	33157	33504	26430	34068	25001	36731	32559	28648		22	22	33.5
	sp|Q569Z5|DDX46_MOUSE Probable ATP-dependent RNA helicase DDX46 OS=Mus musculus OX=10090 GN=Ddx46 PE=1 SV=2;sp|Q569Z5-2|DDX46_MOUSE Isoform 2 of Probable ATP-dependent RNA helicase DDX46 OS=Mus musculus OX=10090 GN=Ddx46	Q569Z5;Q569Z5-2	Probable ATP-dependent RNA helicase DDX46	Ddx46	68790	58481	64150	46458	28191	53270	62665	51368	41183		35	35	41.6
	sp|Q9CWX9|DDX47_MOUSE Probable ATP-dependent RNA helicase DDX47 OS=Mus musculus OX=10090 GN=Ddx47 PE=2 SV=2	Q9CWX9	Probable ATP-dependent RNA helicase DDX47	Ddx47	24687	21022	9682	19462	6724	8682	24762	14176	6112		9	9	22.6
	sp|Q4FZF3|DDX49_MOUSE Probable ATP-dependent RNA helicase DDX49 OS=Mus musculus OX=10090 GN=Ddx49 PE=2 SV=1	Q4FZF3	Probable ATP-dependent RNA helicase DDX49	Ddx49	7494	7640	4116	5719	4128	3651	8037	5036	5983		6	6	17.1
	sp|Q61656|DDX5_MOUSE Probable ATP-dependent RNA helicase DDX5 OS=Mus musculus OX=10090 GN=Ddx5 PE=1 SV=2	Q61656	Probable ATP-dependent RNA helicase DDX5	Ddx5	835456	807089	897653	619963	688686	649875	954256	698499	760910		40	30	63.5
	sp|Q99MJ9|DDX50_MOUSE ATP-dependent RNA helicase DDX50 OS=Mus musculus OX=10090 GN=Ddx50 PE=2 SV=1	Q99MJ9	ATP-dependent RNA helicase DDX50	Ddx50	1206	1283	1199	0	0	374	475	0	1288		3	3	6
	sp|Q6P9R1|DDX51_MOUSE ATP-dependent RNA helicase DDX51 OS=Mus musculus OX=10090 GN=Ddx51 PE=1 SV=1	Q6P9R1	ATP-dependent RNA helicase DDX51	Ddx51	999	2607	5103	5619	5778	3930	4707	4222	5675		8	8	20.5
	sp|Q8K301|DDX52_MOUSE Probable ATP-dependent RNA helicase DDX52 OS=Mus musculus OX=10090 GN=Ddx52 PE=2 SV=2	Q8K301	Probable ATP-dependent RNA helicase DDX52	Ddx52	10342	8462	12079	6656	2263	3152	13257	9566	4570		7	7	18.1
	sp|Q8K4L0|DDX54_MOUSE ATP-dependent RNA helicase DDX54 OS=Mus musculus OX=10090 GN=Ddx54 PE=1 SV=1	Q8K4L0	ATP-dependent RNA helicase DDX54	Ddx54	5760	8652	8831	4893	2808	4851	11243	4791	1694		8	8	11.4
	sp|Q6ZPL9|DDX55_MOUSE ATP-dependent RNA helicase DDX55 OS=Mus musculus OX=10090 GN=Ddx55 PE=1 SV=2	Q6ZPL9	ATP-dependent RNA helicase DDX55	Ddx55	1570	0	5209	596	0	3806	4380	3687	2468		5	5	14.3
	sp|Q9D0R4|DDX56_MOUSE Probable ATP-dependent RNA helicase DDX56 OS=Mus musculus OX=10090 GN=Ddx56 PE=2 SV=1	Q9D0R4	Probable ATP-dependent RNA helicase DDX56	Ddx56	25287	30899	26669	25382	23205	24587	29698	18658	23004		12	12	29.3
	sp|Q6Q899|DDX58_MOUSE Probable ATP-dependent RNA helicase DDX58 OS=Mus musculus OX=10090 GN=Ddx58 PE=1 SV=2;sp|Q6Q899-3|DDX58_MOUSE Isoform 3 of Probable ATP-dependent RNA helicase DDX58 OS=Mus musculus OX=10090 GN=Ddx58;sp|Q6Q899-2|DDX58_MOUSE Isoform 2 o	Q6Q899;Q6Q899-3;Q6Q899-2;Q6Q899-4	Probable ATP-dependent RNA helicase DDX58	Ddx58	2768	2138	2718	5309	5668	1461	3792	687	2193		12	12	15.8
	sp|P54823|DDX6_MOUSE Probable ATP-dependent RNA helicase DDX6 OS=Mus musculus OX=10090 GN=Ddx6 PE=1 SV=1	P54823	Probable ATP-dependent RNA helicase DDX6	Ddx6	152372	127514	163820	120221	90276	84663	174983	94442	111432		24	24	56.9
	sp|Q9CQ62|DECR_MOUSE 2,4-dienoyl-CoA reductase, mitochondrial OS=Mus musculus OX=10090 GN=Decr1 PE=1 SV=1	Q9CQ62	2,4-dienoyl-CoA reductase, mitochondrial	Decr1	5204	4228	9189	6013	5702	5640	5853	1751	6260		3	3	10.1
	sp|Q8C2K1|DEFI6_MOUSE Differentially expressed in FDCP 6 OS=Mus musculus OX=10090 GN=Def6 PE=1 SV=1	Q8C2K1;Q8C2K1-2	Differentially expressed in FDCP 6	Def6	36964	31526	47316	40342	24342	35308	32342	19800	16799		17	17	34.3
	sp|O09005|DEGS1_MOUSE Sphingolipid delta(4)-desaturase DES1 OS=Mus musculus OX=10090 GN=Degs1 PE=1 SV=1	O09005	Sphingolipid delta(4)-desaturase DES1	Degs1	29849	43008	41312	31631	26699	24452	43055	27101	23832		3	3	15.8
	sp|Q7TNV0|DEK_MOUSE Protein DEK OS=Mus musculus OX=10090 GN=Dek PE=1 SV=1	Q7TNV0	Protein DEK	Dek	234843	237473	316477	275613	235657	324477	218083	284927	219479		14	14	30.5
	sp|Q3U1T9-3|DEN1B_MOUSE Isoform 3 of DENN domain-containing protein 1B OS=Mus musculus OX=10090 GN=Dennd1b;sp|Q3U1T9-5|DEN1B_MOUSE Isoform 1 of DENN domain-containing protein 1B OS=Mus musculus OX=10090 GN=Dennd1b;sp|Q3U1T9|DEN1B_MOUSE DENN domain-containi	Q3U1T9-3;Q3U1T9-5;Q3U1T9;Q3U1T9-2	DENN domain-containing protein 1B	Dennd1b	2266	0	0	11976	2016	2258	2076	2154	0		2	2	8.6
	sp|Q91VV4|DEN2D_MOUSE DENN domain-containing protein 2D OS=Mus musculus OX=10090 GN=Dennd2d PE=1 SV=1;sp|Q91VV4-2|DEN2D_MOUSE Isoform 2 of DENN domain-containing protein 2D OS=Mus musculus OX=10090 GN=Dennd2d	Q91VV4;Q91VV4-2	DENN domain-containing protein 2D	Dennd2d	1935	1076	3573	2213	3442	2866	2320	4417	2432		5	5	16.4
	tr|E9Q8V6|E9Q8V6_MOUSE DENN/MADD domain-containing 4A OS=Mus musculus OX=10090 GN=Dennd4a PE=1 SV=1	E9Q8V6		Dennd4a	0	714	743	252	608	907	983	452	839		5	5	4.8
	sp|A6H8H2|DEN4C_MOUSE DENN domain-containing protein 4C OS=Mus musculus OX=10090 GN=Dennd4c PE=1 SV=1;sp|A6H8H2-2|DEN4C_MOUSE Isoform 2 of DENN domain-containing protein 4C OS=Mus musculus OX=10090 GN=Dennd4c	A6H8H2;A6H8H2-2	DENN domain-containing protein 4C	Dennd4c	359	0	1455	196	0	317	478	313	588		5	5	4.9
	sp|Q9CQJ6|DENR_MOUSE Density-regulated protein OS=Mus musculus OX=10090 GN=Denr PE=1 SV=1	Q9CQJ6	Density-regulated protein	Denr	21569	17517	11080	48704	4661	4644	11955	12059	13404		6	6	42.9
	sp|Q91YP3|DEOC_MOUSE Deoxyribose-phosphate aldolase OS=Mus musculus OX=10090 GN=Dera PE=1 SV=1	Q91YP3	Deoxyribose-phosphate aldolase	Dera	8547	8757	35625	2620	24363	31515	17441	17450	15793		11	11	48.4
	sp|Q8BNI4|DERL2_MOUSE Derlin-2 OS=Mus musculus OX=10090 GN=Derl2 PE=1 SV=2	Q8BNI4	Derlin-2	Derl2	0	6083	10001	4890	5966	0	5038	2895	0		1	1	12.6
	sp|Q9EQM6|DGCR8_MOUSE Microprocessor complex subunit DGCR8 OS=Mus musculus OX=10090 GN=Dgcr8 PE=1 SV=2	Q9EQM6	Microprocessor complex subunit DGCR8	Dgcr8	0	1920	5100	3863	2636	5691	949	4222	5225		7	7	9.8
	sp|O88673|DGKA_MOUSE Diacylglycerol kinase alpha OS=Mus musculus OX=10090 GN=Dgka PE=1 SV=2	O88673	Diacylglycerol kinase alpha	Dgka	4546	2493	5837	2554	4607	4069	3504	3814	3390		8	8	16.2
	sp|Q80UP3|DGKZ_MOUSE Diacylglycerol kinase zeta OS=Mus musculus OX=10090 GN=Dgkz PE=1 SV=2	Q80UP3;S4R215;S4R2G0;D3Z519;D3Z2W1;D3YWQ0	Diacylglycerol kinase zeta	Dgkz	4034	0	3079	1918	1797	406	5542	2001	5536		5	5	6.9
	sp|Q8VCH6|DHC24_MOUSE Delta(24)-sterol reductase OS=Mus musculus OX=10090 GN=Dhcr24 PE=1 SV=1	Q8VCH6	Delta(24)-sterol reductase	Dhcr24	10347	2290	3431	10432	7156	3078	4943	0	6321		4	4	6.4
	sp|O88455|DHCR7_MOUSE 7-dehydrocholesterol reductase OS=Mus musculus OX=10090 GN=Dhcr7 PE=1 SV=1	O88455	7-dehydrocholesterol reductase	Dhcr7	8004	6011	11244	11701	3951	3346	7726	9637	2296		3	3	7
	sp|P00375|DYR_MOUSE Dihydrofolate reductase OS=Mus musculus OX=10090 GN=Dhfr PE=1 SV=3	P00375	Dihydrofolate reductase	Dhfr	38204	121273	113172	106006	84236	96405	135318	116943	95519		11	11	56.1
	sp|O35435|PYRD_MOUSE Dihydroorotate dehydrogenase (quinone), mitochondrial OS=Mus musculus OX=10090 GN=Dhodh PE=1 SV=2	O35435	Dihydroorotate dehydrogenase (quinone), mitochondrial	Dhodh	5730	2459	5072	6251	0	4715	5643	9846	4151		4	4	13.7
	sp|Q99L04|DHRS1_MOUSE Dehydrogenase/reductase SDR family member 1 OS=Mus musculus OX=10090 GN=Dhrs1 PE=1 SV=1	Q99L04	Dehydrogenase/reductase SDR family member 1	Dhrs1	263613	213137	242327	190542	186152	1778	9547	143476	149932		6	6	24
	sp|Q99LB2|DHRS4_MOUSE Dehydrogenase/reductase SDR family member 4 OS=Mus musculus OX=10090 GN=Dhrs4 PE=1 SV=3	Q99LB2	Dehydrogenase/reductase SDR family member 4	Dhrs4	4079	5990	10413	7930	0	0	8533	6864	6377		1	1	7.5
	sp|Q9CXR1|DHRS7_MOUSE Dehydrogenase/reductase SDR family member 7 OS=Mus musculus OX=10090 GN=Dhrs7 PE=1 SV=2	Q9CXR1	Dehydrogenase/reductase SDR family member 7	Dhrs7	11200	5012	5554	7730	4428	3647	13608	6747	11787		4	4	16.6
	sp|Q99J47-2|DRS7B_MOUSE Isoform 2 of Dehydrogenase/reductase SDR family member 7B OS=Mus musculus OX=10090 GN=Dhrs7b;sp|Q99J47|DRS7B_MOUSE Dehydrogenase/reductase SDR family member 7B OS=Mus musculus OX=10090 GN=Dhrs7b PE=1 SV=1	Q99J47-2;Q99J47	Dehydrogenase/reductase SDR family member 7B	Dhrs7b	5112	2967	5753	0	0	6494	7929	6691	3887		2	2	9.6
	sp|O35286|DHX15_MOUSE Pre-mRNA-splicing factor ATP-dependent RNA helicase DHX15 OS=Mus musculus OX=10090 GN=Dhx15 PE=1 SV=2	O35286	Pre-mRNA-splicing factor ATP-dependent RNA helicase DHX15	Dhx15	177358	198932	218861	145637	106275	130594	172244	134849	140078		33	32	45.4
	tr|G3X8X0|G3X8X0_MOUSE DEAH (Asp-Glu-Ala-His) box polypeptide 16 OS=Mus musculus OX=10090 GN=Dhx16 PE=1 SV=1;tr|Q05BH3|Q05BH3_MOUSE DEAH (Asp-Glu-Ala-His) box polypeptide 16 OS=Mus musculus OX=10090 GN=Dhx16 PE=1 SV=1	G3X8X0;Q05BH3;G3UXT5		Dhx16	3234	0	0	1046	0	854	3601	7705	1053		9	9	13.1
	sp|Q6PGC1|DHX29_MOUSE ATP-dependent RNA helicase DHX29 OS=Mus musculus OX=10090 GN=Dhx29 PE=1 SV=1	Q6PGC1	ATP-dependent RNA helicase Dhx29	Dhx29	5952	3443	7042	6754	4827	685	5922	5177	4740		20	20	19.9
	sp|Q99PU8-2|DHX30_MOUSE Isoform 2 of ATP-dependent RNA helicase DHX30 OS=Mus musculus OX=10090 GN=Dhx30;sp|Q99PU8|DHX30_MOUSE ATP-dependent RNA helicase DHX30 OS=Mus musculus OX=10090 GN=Dhx30 PE=1 SV=1;sp|Q99PU8-3|DHX30_MOUSE Isoform 3 of ATP-dependent RN	Q99PU8-2;Q99PU8;Q99PU8-3	Putative ATP-dependent RNA helicase DHX30	Dhx30	7094	331	2076	2958	1611	3193	982	2503	524		12	12	12.1
	sp|Q80VY9|DHX33_MOUSE ATP-dependent RNA helicase DHX33 OS=Mus musculus OX=10090 GN=Dhx33 PE=1 SV=1	Q80VY9	Putative ATP-dependent RNA helicase DHX33	Dhx33	958	1810	671	0	0	0	0	1931	841		4	4	8.5
	sp|Q8VHK9|DHX36_MOUSE ATP-dependent DNA/RNA helicase DHX36 OS=Mus musculus OX=10090 GN=Dhx36 PE=1 SV=2	Q8VHK9	ATP-dependent RNA helicase DHX36	Dhx36	5593	2764	5649	3630	4310	2546	4239	4697	2049		13	13	20
	tr|Q6NZL1|Q6NZL1_MOUSE DEAH (Asp-Glu-Ala-His) box polypeptide 37 OS=Mus musculus OX=10090 GN=Dhx37 PE=1 SV=1	Q6NZL1		Dhx37	2376	2558	3131	2668	1466	2486	3665	3640	3470		10	10	11.2
	tr|Q80X98|Q80X98_MOUSE DEAH (Asp-Glu-Ala-His) box polypeptide 38 OS=Mus musculus OX=10090 GN=Dhx38 PE=1 SV=1	Q80X98		Dhx38	403	1648	1514	350	659	0	1911	990	1597		10	10	9.9
	sp|A2A4P0|DHX8_MOUSE ATP-dependent RNA helicase DHX8 OS=Mus musculus OX=10090 GN=Dhx8 PE=2 SV=1	A2A4P0	ATP-dependent RNA helicase DHX8	Dhx8	640	646	552	0	1221	1051	1377	532	380		4	4	5.6
	sp|O70133-2|DHX9_MOUSE Isoform 2 of ATP-dependent RNA helicase A OS=Mus musculus OX=10090 GN=Dhx9;sp|O70133|DHX9_MOUSE ATP-dependent RNA helicase A OS=Mus musculus OX=10090 GN=Dhx9 PE=1 SV=2;sp|O70133-3|DHX9_MOUSE Isoform 3 of ATP-dependent RNA helicase A	O70133-2;O70133;O70133-3	ATP-dependent RNA helicase A	Dhx9	185651	150388	155620	177432	138208	166181	197968	142735	136135		49	49	42.5
	sp|O08808|DIAP1_MOUSE Protein diaphanous homolog 1 OS=Mus musculus OX=10090 GN=Diaph1 PE=1 SV=1	O08808	Protein diaphanous homolog 1	Diaph1	47098	49773	87165	44570	21704	34015	46133	40030	41191		36	36	33.7
	sp|Q8R418-2|DICER_MOUSE Isoform 2 of Endoribonuclease Dicer OS=Mus musculus OX=10090 GN=Dicer1;sp|Q8R418|DICER_MOUSE Endoribonuclease Dicer OS=Mus musculus OX=10090 GN=Dicer1 PE=1 SV=3	Q8R418-2;Q8R418	Endoribonuclease Dicer	Dicer1	483	347	393	343	809	984	360	433	437		5	5	4.1
	sp|Q8C9B9|DIDO1_MOUSE Death-inducer obliterator 1 OS=Mus musculus OX=10090 GN=Dido1 PE=1 SV=4;sp|Q8C9B9-3|DIDO1_MOUSE Isoform 3 of Death-inducer obliterator 1 OS=Mus musculus OX=10090 GN=Dido1	Q8C9B9;Q8C9B9-3	Death-inducer obliterator 1	Dido1	675	934	2295	822	1059	681	755	1124	1339		9	9	5.8
	sp|Q8BTT6|DIEXF_MOUSE Digestive organ expansion factor homolog OS=Mus musculus OX=10090 GN=Diexf PE=2 SV=2	Q8BTT6	Digestive organ expansion factor homolog	Diexf	1209	2414	3801	3715	2787	3085	1208	3466	1614		10	10	17.5
	sp|Q9D0D4|DIM1_MOUSE Probable dimethyladenosine transferase OS=Mus musculus OX=10090 GN=Dimt1 PE=2 SV=1	Q9D0D4	Probable dimethyladenosine transferase	Dimt1	61754	56772	46792	42583	8405	44469	67882	29489	42298		12	12	47
	sp|Q9CSH3|RRP44_MOUSE Exosome complex exonuclease RRP44 OS=Mus musculus OX=10090 GN=Dis3 PE=1 SV=4	Q9CSH3	Exosome complex exonuclease RRP44	Dis3	45956	40448	40225	40110	27461	32258	51553	41502	37133		31	31	46.1
	sp|Q8CI75|DI3L2_MOUSE DIS3-like exonuclease 2 OS=Mus musculus OX=10090 GN=Dis3l2 PE=1 SV=1;sp|Q8CI75-2|DI3L2_MOUSE Isoform 2 of DIS3-like exonuclease 2 OS=Mus musculus OX=10090 GN=Dis3l2	Q8CI75;Q8CI75-2	DIS3-like exonuclease 2	Dis3l2	1691	1227	2435	591	596	718	869	1141	353		4	4	7.7
	sp|Q9ESX5|DKC1_MOUSE H/ACA ribonucleoprotein complex subunit DKC1 OS=Mus musculus OX=10090 GN=Dkc1 PE=1 SV=4	Q9ESX5	H/ACA ribonucleoprotein complex subunit 4	Dkc1	116007	90808	147831	128460	99122	143074	125833	142641	112431		22	22	47.7
	sp|Q8BMF4|ODP2_MOUSE Dihydrolipoyllysine-residue acetyltransferase component of pyruvate dehydrogenase complex, mitochondrial OS=Mus musculus OX=10090 GN=Dlat PE=1 SV=2	Q8BMF4	Dihydrolipoyllysine-residue acetyltransferase component of pyruvate dehydrogenase complex, mitochondrial	Dlat	32843	17547	17119	23779	29793	19674	22159	40151	21771		14	14	33.5
	sp|O08749|DLDH_MOUSE Dihydrolipoyl dehydrogenase, mitochondrial OS=Mus musculus OX=10090 GN=Dld PE=1 SV=2	O08749	Dihydrolipoyl dehydrogenase, mitochondrial	Dld	102365	54318	114843	126905	97474	94147	118460	84101	131759		15	15	39.3
	sp|B1AZP2-3|DLGP4_MOUSE Isoform 3 of Disks large-associated protein 4 OS=Mus musculus OX=10090 GN=Dlgap4;sp|B1AZP2-2|DLGP4_MOUSE Isoform 2 of Disks large-associated protein 4 OS=Mus musculus OX=10090 GN=Dlgap4;sp|B1AZP2|DLGP4_MOUSE Disks large-associated p	B1AZP2-3;B1AZP2-2;B1AZP2	Disks large-associated protein 4	Dlgap4	4068	3293	3583	2525	3104	1991	3314	0	0		2	2	4.2
	sp|Q8K4R9|DLGP5_MOUSE Disks large-associated protein 5 OS=Mus musculus OX=10090 GN=Dlgap5 PE=1 SV=2;sp|Q8K4R9-2|DLGP5_MOUSE Isoform 2 of Disks large-associated protein 5 OS=Mus musculus OX=10090 GN=Dlgap5;sp|Q8K4R9-3|DLGP5_MOUSE Isoform 3 of Disks large-as	Q8K4R9;Q8K4R9-2;Q8K4R9-3	Disks large-associated protein 5	Dlgap5	2799	5414	7482	7294	0	6833	5506	2187	2859		7	7	14.1
	sp|Q9D2G2|ODO2_MOUSE Dihydrolipoyllysine-residue succinyltransferase component of 2-oxoglutarate dehydrogenase complex, mitochondrial OS=Mus musculus OX=10090 GN=Dlst PE=1 SV=1;sp|Q9D2G2-2|ODO2_MOUSE Isoform 2 of Dihydrolipoyllysine-residue succinyltransfe	Q9D2G2;Q9D2G2-2	Dihydrolipoyllysine-residue succinyltransferase component of 2-oxoglutarate dehydrogenase complex, mitochondrial	Dlst	52085	60821	50980	49665	66430	52711	56878	35666	41538		13	13	35.2
	sp|B9EJR8|DAAF5_MOUSE Dynein assembly factor 5, axonemal OS=Mus musculus OX=10090 GN=Dnaaf5 PE=1 SV=1	B9EJR8	Dynein assembly factor 5, axonemal	Dnaaf5	1059	538	1550	2507	918	1328	3024	1157	578		3	3	5.5
	sp|P63037|DNJA1_MOUSE DnaJ homolog subfamily A member 1 OS=Mus musculus OX=10090 GN=Dnaja1 PE=1 SV=1	P63037	DnaJ homolog subfamily A member 1	Dnaja1	201418	160358	216789	155464	253639	439591	288953	404575	332365		14	14	48.4
	sp|Q9QYJ0|DNJA2_MOUSE DnaJ homolog subfamily A member 2 OS=Mus musculus OX=10090 GN=Dnaja2 PE=1 SV=1	Q9QYJ0	DnaJ homolog subfamily A member 2	Dnaja2	167777	162308	163754	128431	96585	102864	118240	105292	138296		17	17	53.4
	sp|Q99M87-3|DNJA3_MOUSE Isoform 3 of DnaJ homolog subfamily A member 3, mitochondrial OS=Mus musculus OX=10090 GN=Dnaja3;sp|Q99M87-2|DNJA3_MOUSE Isoform 2 of DnaJ homolog subfamily A member 3, mitochondrial OS=Mus musculus OX=10090 GN=Dnaja3;sp|Q99M87|DNJA	Q99M87-3;Q99M87-2;Q99M87	DnaJ homolog subfamily A member 3, mitochondrial	Dnaja3	20986	6316	15001	14424	8358	3983	10986	5594	15618		5	5	16.8
	sp|Q9JMC3|DNJA4_MOUSE DnaJ homolog subfamily A member 4 OS=Mus musculus OX=10090 GN=Dnaja4 PE=1 SV=1	Q9JMC3	DnaJ homolog subfamily A member 4	Dnaja4	0	0	13846	8843	10912	0	21465	0	14369		1	1	2
	sp|Q9QYJ3|DNJB1_MOUSE DnaJ homolog subfamily B member 1 OS=Mus musculus OX=10090 GN=Dnajb1 PE=1 SV=3	Q9QYJ3	DnaJ homolog subfamily B member 1	Dnajb1	33269	29753	25120	32726	30630	32937	38016	35519	20621		9	8	29.7
	sp|Q99KV1|DJB11_MOUSE DnaJ homolog subfamily B member 11 OS=Mus musculus OX=10090 GN=Dnajb11 PE=1 SV=1	Q99KV1	DnaJ homolog subfamily B member 11	Dnajb11	115661	97034	63108	37464	23595	62006	47326	57046	68861		11	11	40.5
	sp|O54946|DNJB6_MOUSE DnaJ homolog subfamily B member 6 OS=Mus musculus OX=10090 GN=Dnajb6 PE=1 SV=4;sp|O54946-2|DNJB6_MOUSE Isoform B of DnaJ homolog subfamily B member 6 OS=Mus musculus OX=10090 GN=Dnajb6	O54946;O54946-2;Q9QYI8	DnaJ homolog subfamily B member 6	Dnajb6	18186	4908	25921	15880	11861	14666	15511	18062	21865		6	6	20.8
	sp|Q61712|DNJC1_MOUSE DnaJ homolog subfamily C member 1 OS=Mus musculus OX=10090 GN=Dnajc1 PE=1 SV=1	Q61712	DnaJ homolog subfamily C member 1	Dnajc1	3313	1082	1133	4666	1761	3044	3992	4398	3288		5	5	9.4
	sp|Q5U458|DJC11_MOUSE DnaJ homolog subfamily C member 11 OS=Mus musculus OX=10090 GN=Dnajc11 PE=1 SV=2	Q5U458	DnaJ homolog subfamily C member 11	Dnajc11	5801	3818	5507	8154	6997	3225	7745	8423	7485		8	8	18.4
	tr|G3X922|G3X922_MOUSE DnaJ heat shock protein family (Hsp40) member C13 OS=Mus musculus OX=10090 GN=Dnajc13 PE=1 SV=1;tr|D4AFX7|D4AFX7_MOUSE DnaJ heat shock protein family (Hsp40) member C13 OS=Mus musculus OX=10090 GN=Dnajc13 PE=1 SV=1	G3X922;D4AFX7;A0A1L1STR9;A0A087WRC9		Dnajc13	2850	1047	3057	3617	2429	2572	4004	2480	3689		21	21	12.6
	sp|P54103|DNJC2_MOUSE DnaJ homolog subfamily C member 2 OS=Mus musculus OX=10090 GN=Dnajc2 PE=1 SV=2	P54103	DnaJ homolog subfamily C member 2;DnaJ homolog subfamily C member 2, N-terminally processed	Dnajc2	28974	30253	38137	20867	31710	26530	36137	16850	23881		15	15	37
	sp|E9Q8D0|DJC21_MOUSE DnaJ homolog subfamily C member 21 OS=Mus musculus OX=10090 GN=Dnajc21 PE=1 SV=1	E9Q8D0		Dnajc21	2601	0	2835	1357	1478	0	1878	0	1596		2	2	6.8
	sp|Q91YW3|DNJC3_MOUSE DnaJ homolog subfamily C member 3 OS=Mus musculus OX=10090 GN=Dnajc3 PE=1 SV=1	Q91YW3	DnaJ homolog subfamily C member 3	Dnajc3	39246	24724	35483	11172	15488	18017	25603	37188	48865		15	15	46
	sp|P60904|DNJC5_MOUSE DnaJ homolog subfamily C member 5 OS=Mus musculus OX=10090 GN=Dnajc5 PE=1 SV=1	P60904	DnaJ homolog subfamily C member 5	Dnajc5	14528	7254	5372	13199	0	8223	8039	11803	9930		2	2	15.7
	sp|Q9QYI3|DNJC7_MOUSE DnaJ homolog subfamily C member 7 OS=Mus musculus OX=10090 GN=Dnajc7 PE=1 SV=2	Q9QYI3	DnaJ homolog subfamily C member 7	Dnajc7	110292	96309	116071	105996	76267	53527	126186	93467	76164		20	20	44.9
	sp|Q6NZB0|DNJC8_MOUSE DnaJ homolog subfamily C member 8 OS=Mus musculus OX=10090 GN=Dnajc8 PE=1 SV=2	Q6NZB0	DnaJ homolog subfamily C member 8	Dnajc8	187920	195582	227764	141283	139828	165300	217275	140602	181492		7	7	32.4
	sp|Q91WN1|DNJC9_MOUSE DnaJ homolog subfamily C member 9 OS=Mus musculus OX=10090 GN=Dnajc9 PE=1 SV=2	Q91WN1	DnaJ homolog subfamily C member 9	Dnajc9	123958	115024	158822	102559	112697	98195	111253	113136	109979		8	8	44
	sp|Q8K1M6-3|DNM1L_MOUSE Isoform 3 of Dynamin-1-like protein OS=Mus musculus OX=10090 GN=Dnm1l	Q8K1M6-3	Dynamin-1-like protein	Dnm1l	43455	39058	65539	51751	43775	44374	57524	37459	37568		23	1	42.2
	sp|P39054|DYN2_MOUSE Dynamin-2 OS=Mus musculus OX=10090 GN=Dnm2 PE=1 SV=2;sp|P39054-2|DYN2_MOUSE Isoform 2 of Dynamin-2 OS=Mus musculus OX=10090 GN=Dnm2	P39054;P39054-2;P39053-5;P39053-3;P39053-6;P39053-4;P39053	Dynamin-2	Dnm2	120953	111315	130820	70985	88993	74876	78006	54813	63916		32	25	48.3
	sp|P13864|DNMT1_MOUSE DNA (cytosine-5)-methyltransferase 1 OS=Mus musculus OX=10090 GN=Dnmt1 PE=1 SV=5;sp|P13864-2|DNMT1_MOUSE Isoform 2 of DNA (cytosine-5)-methyltransferase 1 OS=Mus musculus OX=10090 GN=Dnmt1	P13864;P13864-2	DNA (cytosine-5)-methyltransferase 1	Dnmt1	103331	111046	124208	121349	103384	96629	99562	90910	74149		67	67	50.2
	sp|O88508-2|DNM3A_MOUSE Isoform 2 of DNA (cytosine-5)-methyltransferase 3A OS=Mus musculus OX=10090 GN=Dnmt3a;sp|O88508|DNM3A_MOUSE DNA (cytosine-5)-methyltransferase 3A OS=Mus musculus OX=10090 GN=Dnmt3a PE=1 SV=2	O88508-2;O88508	DNA (cytosine-5)-methyltransferase 3A	Dnmt3a	2048	979	2551	2210	1396	1791	4000	3622	837		3	2	5.2
	sp|Q9Z2W0|DNPEP_MOUSE Aspartyl aminopeptidase OS=Mus musculus OX=10090 GN=Dnpep PE=1 SV=2	Q9Z2W0	Aspartyl aminopeptidase	Dnpep	57313	28696	19660	23057	15084	20933	30332	27869	9030		13	13	40.6
	sp|Q80VJ3|DNPH1_MOUSE 2-deoxynucleoside 5-phosphate N-hydrolase 1 OS=Mus musculus OX=10090 GN=Dnph1 PE=1 SV=2	Q80VJ3	2-deoxynucleoside 5-phosphate N-hydrolase 1	Dnph1	2580	4491	10899	31730	7190	9287	14564	17116	2395		4	4	52
	sp|Q8R2M2|TDIF2_MOUSE Deoxynucleotidyltransferase terminal-interacting protein 2 OS=Mus musculus OX=10090 GN=Dnttip2 PE=1 SV=1	Q8R2M2	Deoxynucleotidyltransferase terminal-interacting protein 2	Dnttip2	6097	5185	8727	9714	10668	5311	8217	12475	15053		10	10	23.5
	sp|Q8BZN6-4|DOC10_MOUSE Isoform 4 of Dedicator of cytokinesis protein 10 OS=Mus musculus OX=10090 GN=Dock10	Q8BZN6-4	Dedicator of cytokinesis protein 10	Dock10	16294	13470	13141	14328	11814	10936	18510	10954	10960		47	1	30.4
	sp|A2AF47|DOC11_MOUSE Dedicator of cytokinesis protein 11 OS=Mus musculus OX=10090 GN=Dock11 PE=1 SV=1	A2AF47	Dedicator of cytokinesis protein 11	Dock11	5872	4574	6556	8132	8587	9199	8719	6123	7743		27	27	18.7
	sp|Q8C3J5|DOCK2_MOUSE Dedicator of cytokinesis protein 2 OS=Mus musculus OX=10090 GN=Dock2 PE=1 SV=3	Q8C3J5	Dedicator of cytokinesis protein 2	Dock2	92757	58788	64604	69290	76139	53436	72614	48787	51583		60	60	40.9
	sp|Q8C147|DOCK8_MOUSE Dedicator of cytokinesis protein 8 OS=Mus musculus OX=10090 GN=Dock8 PE=1 SV=4	Q8C147;Q8C147-2;Q8VDR9;Q8R1A4-2;Q8R1A4	Dedicator of cytokinesis protein 8	Dock8	29191	19836	21021	16819	18959	17567	20629	16761	19982		49	49	30.7
	sp|O70469|DOK2_MOUSE Docking protein 2 OS=Mus musculus OX=10090 GN=Dok2 PE=1 SV=1	O70469	Docking protein 2	Dok2	16029	14954	30560	16769	14556	18430	18007	25944	5733		8	8	23.3
	sp|Q61103|REQU_MOUSE Zinc finger protein ubi-d4 OS=Mus musculus OX=10090 GN=Dpf2 PE=1 SV=1	Q61103;Q9QX66-3;P58269;Q9QX66;Q9QX66-2;Q8BRB7-2;Q8BRB7;Q8BZ21	Zinc finger protein ubi-d4	Dpf2	24956	14333	16451	23610	8492	13533	30296	33835	21850		9	9	32.2
	sp|Q5NCQ5|DPH1_MOUSE 2-(3-amino-3-carboxypropyl)histidine synthase subunit 1 OS=Mus musculus OX=10090 GN=Dph1 PE=1 SV=1	Q5NCQ5	Diphthamide biosynthesis protein 1	Dph1	0	7628	1108	2134	0	1464	1449	1712	2036		3	3	7.8
	sp|Q9CWQ0|DPH5_MOUSE Diphthine methyl ester synthase OS=Mus musculus OX=10090 GN=Dph5 PE=1 SV=2	Q9CWQ0	Diphthine synthase	Dph5	0	0	18342	8628	13290	7356	958	6709	0		4	4	23.8
	sp|Q9CQ28-2|DPH6_MOUSE Isoform 2 of Diphthine--ammonia ligase OS=Mus musculus OX=10090 GN=Dph6;sp|Q9CQ28|DPH6_MOUSE Diphthine--ammonia ligase OS=Mus musculus OX=10090 GN=Dph6 PE=1 SV=1;sp|Q9CQ28-3|DPH6_MOUSE Isoform 3 of Diphthine--ammonia ligase OS=Mus mu	Q9CQ28-2;Q9CQ28;Q9CQ28-3	Diphthine--ammonia ligase	Dph6	0	3292	4140	3702	0	2456	6418	1350	1560		4	4	22.5
	sp|O70152|DPM1_MOUSE Dolichol-phosphate mannosyltransferase subunit 1 OS=Mus musculus OX=10090 GN=Dpm1 PE=1 SV=1	O70152	Dolichol-phosphate mannosyltransferase subunit 1	Dpm1	11066	15211	18273	15013	9514	17547	18964	7907	14969		6	6	31.2
	sp|Q99KK7|DPP3_MOUSE Dipeptidyl peptidase 3 OS=Mus musculus OX=10090 GN=Dpp3 PE=1 SV=2	Q99KK7	Dipeptidyl peptidase 3	Dpp3	86237	88728	134729	71153	63624	69609	79262	57689	63625		25	25	52
	sp|P28843|DPP4_MOUSE Dipeptidyl peptidase 4 OS=Mus musculus OX=10090 GN=Dpp4 PE=1 SV=3	P28843	Dipeptidyl peptidase 4;Dipeptidyl peptidase 4 membrane form;Dipeptidyl peptidase 4 soluble form	Dpp4	30178	22051	20187	30244	13460	15684	37181	19462	31599		19	19	31.6
	sp|Q8BVG4|DPP9_MOUSE Dipeptidyl peptidase 9 OS=Mus musculus OX=10090 GN=Dpp9 PE=1 SV=2;sp|Q8BVG4-2|DPP9_MOUSE Isoform 2 of Dipeptidyl peptidase 9 OS=Mus musculus OX=10090 GN=Dpp9	Q8BVG4;Q8BVG4-2	Dipeptidyl peptidase 9	Dpp9	1127	2855	9488	4984	5240	0	6514	1387	3994		9	9	14.6
	sp|O08553|DPYL2_MOUSE Dihydropyrimidinase-related protein 2 OS=Mus musculus OX=10090 GN=Dpysl2 PE=1 SV=2	O08553;Q62188	Dihydropyrimidinase-related protein 2	Dpysl2	305049	340862	429053	403316	359348	326671	611543	283838	329954		29	25	74.8
	sp|Q91WV0|NC2B_MOUSE Protein Dr1 OS=Mus musculus OX=10090 GN=Dr1 PE=1 SV=1	Q91WV0	Protein Dr1	Dr1	3813	5030	6386	4630	3465	3440	3754	23645	3283		2	2	21
	sp|Q9D6N5|NC2A_MOUSE Dr1-associated corepressor OS=Mus musculus OX=10090 GN=Drap1 PE=1 SV=3	Q9D6N5	Dr1-associated corepressor	Drap1	12936	20477	31735	1978	8416	15270	11214	11142	11298		3	3	15.6
	sp|P32233|DRG1_MOUSE Developmentally-regulated GTP-binding protein 1 OS=Mus musculus OX=10090 GN=Drg1 PE=1 SV=1	P32233	Developmentally-regulated GTP-binding protein 1	Drg1	139716	102534	167574	116456	93125	85683	140915	96676	115066		19	18	61.3
	sp|Q9QXB9|DRG2_MOUSE Developmentally-regulated GTP-binding protein 2 OS=Mus musculus OX=10090 GN=Drg2 PE=1 SV=1	Q9QXB9	Developmentally-regulated GTP-binding protein 2	Drg2	82701	38583	39727	76709	59058	46900	72059	62275	49246		12	12	38.5
	sp|O35075|VP26C_MOUSE Vacuolar protein sorting-associated protein 26C OS=Mus musculus OX=10090 GN=Vps26c PE=1 SV=1	O35075	Down syndrome critical region protein 3 homolog	Dscr3	6470	4896	6226	5634	7328	7341	6878	5347	4227		4	4	20.5
	sp|Q9R0P5|DEST_MOUSE Destrin OS=Mus musculus OX=10090 GN=Dstn PE=1 SV=3	Q9R0P5	Destrin	Dstn	50967	55381	42174	35298	53895	62154	20856	57152	56020		5	5	43
	sp|Q8BHA3-2|DTD2_MOUSE Isoform 2 of D-aminoacyl-tRNA deacylase 2 OS=Mus musculus OX=10090 GN=Dtd2;sp|Q8BHA3|DTD2_MOUSE D-aminoacyl-tRNA deacylase 2 OS=Mus musculus OX=10090 GN=Dtd2 PE=1 SV=1	Q8BHA3-2;Q8BHA3	Probable D-tyrosyl-tRNA(Tyr) deacylase 2	Dtd2	4566	10944	4817	3790	1225	1995	3864	3078	4508		2	2	22.9
	sp|Q3UIR3|DTX3L_MOUSE E3 ubiquitin-protein ligase DTX3L OS=Mus musculus OX=10090 GN=Dtx3l PE=1 SV=1;sp|Q3UIR3-2|DTX3L_MOUSE Isoform 2 of E3 ubiquitin-protein ligase DTX3L OS=Mus musculus OX=10090 GN=Dtx3l	Q3UIR3;Q3UIR3-2	E3 ubiquitin-protein ligase DTX3L	Dtx3l	7471	12023	10071	3744	5513	10126	4810	8295	4212		10	10	25.5
	sp|P97930|KTHY_MOUSE Thymidylate kinase OS=Mus musculus OX=10090 GN=Dtymk PE=1 SV=2;sp|P97930-2|KTHY_MOUSE Isoform Short of Thymidylate kinase OS=Mus musculus OX=10090 GN=Dtymk	P97930;P97930-2	Thymidylate kinase	Dtymk	15514	25990	78739	45717	33523	61672	60969	39697	43304		9	9	41.5
	sp|Q9D7B1|DUS2L_MOUSE tRNA-dihydrouridine(20) synthase [NAD(P)+]-like OS=Mus musculus OX=10090 GN=Dus2 PE=1 SV=1	Q9D7B1	tRNA-dihydrouridine(20) synthase [NAD(P)+]-like	Dus2	0	0	0	0	608	1304	0	834	1733		2	2	5.1
	sp|Q91XI1|DUS3L_MOUSE tRNA-dihydrouridine(47) synthase [NAD(P)(+)]-like OS=Mus musculus OX=10090 GN=Dus3l PE=1 SV=1;sp|Q91XI1-2|DUS3L_MOUSE Isoform 2 of tRNA-dihydrouridine(47) synthase [NAD(P)(+)]-like OS=Mus musculus OX=10090 GN=Dus3l	Q91XI1;Q91XI1-2	tRNA-dihydrouridine(47) synthase [NAD(P)(+)]-like	Dus3l	2895	0	4426	4011	1909	0	5565	3169	6288		3	3	8.6
	sp|Q8K4T5|DUS19_MOUSE Dual specificity protein phosphatase 19 OS=Mus musculus OX=10090 GN=Dusp19 PE=2 SV=1	Q8K4T5	Dual specificity protein phosphatase 19	Dusp19	0	1438	3220	2954	0	0	2149	0	2067		1	1	8.6
	tr|Q9CQ43|Q9CQ43_MOUSE Deoxyuridine triphosphatase OS=Mus musculus OX=10090 GN=Dut PE=1 SV=1;tr|Q8VCG1|Q8VCG1_MOUSE Deoxyuridine triphosphatase OS=Mus musculus OX=10090 GN=Dut PE=1 SV=1	Q9CQ43;Q8VCG1		Dut	578808	709394	760031	518986	560090	560406	576959	571888	554193		10	10	73.5
	sp|Q9JHU4|DYHC1_MOUSE Cytoplasmic dynein 1 heavy chain 1 OS=Mus musculus OX=10090 GN=Dync1h1 PE=1 SV=2	Q9JHU4	Cytoplasmic dynein 1 heavy chain 1	Dync1h1	41730	36912	60670	49169	41130	38354	50091	42314	41221		188	188	50.7
	sp|O88487|DC1I2_MOUSE Cytoplasmic dynein 1 intermediate chain 2 OS=Mus musculus OX=10090 GN=Dync1i2 PE=1 SV=1	O88487	Cytoplasmic dynein 1 intermediate chain 2	Dync1i2	27038	24721	35292	16565	20454	16345	8458	16837	22452		12	12	36.8
	sp|Q8R1Q8|DC1L1_MOUSE Cytoplasmic dynein 1 light intermediate chain 1 OS=Mus musculus OX=10090 GN=Dync1li1 PE=1 SV=1	Q8R1Q8	Cytoplasmic dynein 1 light intermediate chain 1	Dync1li1	28089	35575	51376	21625	24582	29838	21773	25537	22984		16	15	40.7
	sp|Q6PDL0|DC1L2_MOUSE Cytoplasmic dynein 1 light intermediate chain 2 OS=Mus musculus OX=10090 GN=Dync1li2 PE=1 SV=2	Q6PDL0	Cytoplasmic dynein 1 light intermediate chain 2	Dync1li2	4187	2345	3258	6920	2836	0	1090	4178	4117		6	6	24
	sp|P63168|DYL1_MOUSE Dynein light chain 1, cytoplasmic OS=Mus musculus OX=10090 GN=Dynll1 PE=1 SV=1	P63168	Dynein light chain 1, cytoplasmic	Dynll1	386098	325238	375669	310400	194664	446182	348573	461837	76075		5	2	58.4
	sp|Q9D0M5|DYL2_MOUSE Dynein light chain 2, cytoplasmic OS=Mus musculus OX=10090 GN=Dynll2 PE=1 SV=1	Q9D0M5	Dynein light chain 2, cytoplasmic	Dynll2	0	0	0	28174	28967	41757	31450	31392	28561		2	2	58.4
	sp|P51807|DYLT1_MOUSE Dynein light chain Tctex-type 1 OS=Mus musculus OX=10090 GN=Dynlt1 PE=1 SV=1	P51807	Dynein light chain Tctex-type 1	Dynlt1	10077	12847	15500	25835	18487	6457	28797	28371	8426		3	3	38.9
	sp|Q9D903|EBP2_MOUSE Probable rRNA-processing protein EBP2 OS=Mus musculus OX=10090 GN=Ebna1bp2 PE=2 SV=1	Q9D903	Probable rRNA-processing protein EBP2	Ebna1bp2	113813	81989	70834	77832	41017	88171	82918	66000	71077		11	11	37.9
	sp|P70245|EBP_MOUSE 3-beta-hydroxysteroid-Delta(8),Delta(7)-isomerase OS=Mus musculus OX=10090 GN=Ebp PE=1 SV=3	P70245	3-beta-hydroxysteroid-Delta(8),Delta(7)-isomerase	Ebp	51228	0	0	7312	23849	0	34345	37425	0		3	3	15.2
	sp|Q9CS74|ECD_MOUSE Protein ecdysoneless homolog OS=Mus musculus OX=10090 GN=Ecd PE=1 SV=2	Q9CS74	Protein SGT1 homolog	Ecd	1047	800	3327	2437	448	1474	0	1146	1600		5	5	11.5
	sp|O35459|ECH1_MOUSE Delta(3,5)-Delta(2,4)-dienoyl-CoA isomerase, mitochondrial OS=Mus musculus OX=10090 GN=Ech1 PE=1 SV=1	O35459	Delta(3,5)-Delta(2,4)-dienoyl-CoA isomerase, mitochondrial	Ech1	4621	6793	10995	13592	3137	8949	5479	5686	1312		7	7	28.1
	sp|Q8BH95|ECHM_MOUSE Enoyl-CoA hydratase, mitochondrial OS=Mus musculus OX=10090 GN=Echs1 PE=1 SV=1	Q8BH95	Enoyl-CoA hydratase, mitochondrial	Echs1	16128	24138	18862	22614	14825	27968	27763	15558	12538		5	5	23.1
	sp|P42125|ECI1_MOUSE Enoyl-CoA delta isomerase 1, mitochondrial OS=Mus musculus OX=10090 GN=Eci1 PE=1 SV=2	P42125	Enoyl-CoA delta isomerase 1, mitochondrial	Eci1	3238	3086	7614	9073	7888	16128	0	10051	0		4	4	15.6
	sp|Q9WUR2|ECI2_MOUSE Enoyl-CoA delta isomerase 2, mitochondrial OS=Mus musculus OX=10090 GN=Eci2 PE=1 SV=2;sp|Q9WUR2-2|ECI2_MOUSE Isoform 2 of Enoyl-CoA delta isomerase 2, mitochondrial OS=Mus musculus OX=10090 GN=Eci2	Q9WUR2;Q9WUR2-2;Q78JN3	Enoyl-CoA delta isomerase 2, mitochondrial	Eci2	2971	0	3563	1576	2118	2053	0	1256	0		6	6	20.5
	sp|Q6PDI5-2|ECM29_MOUSE Isoform 2 of Proteasome adapter and scaffold protein ECM29 OS=Mus musculus OX=10090 GN=Ecpas;sp|Q6PDI5|ECM29_MOUSE Proteasome adapter and scaffold protein ECM29 OS=Mus musculus OX=10090 GN=Ecpas PE=1 SV=3	Q6PDI5-2;Q6PDI5	Proteasome-associated protein ECM29 homolog	Ecm29	27189	18034	31751	27740	21066	28452	33312	25879	19624		45	45	33.9
	sp|Q8K2D3|EDC3_MOUSE Enhancer of mRNA-decapping protein 3 OS=Mus musculus OX=10090 GN=Edc3 PE=1 SV=1	Q8K2D3	Enhancer of mRNA-decapping protein 3	Edc3	3848	1093	1263	2228	1695	1425	1583	2308	1797		3	3	8.3
	sp|Q3UJB9|EDC4_MOUSE Enhancer of mRNA-decapping protein 4 OS=Mus musculus OX=10090 GN=Edc4 PE=1 SV=2;sp|Q3UJB9-2|EDC4_MOUSE Isoform 2 of Enhancer of mRNA-decapping protein 4 OS=Mus musculus OX=10090 GN=Edc4	Q3UJB9;Q3UJB9-2	Enhancer of mRNA-decapping protein 4	Edc4	19229	14553	13943	14105	13854	7147	13160	12856	14586		22	22	26.5
	sp|Q9JMG1|EDF1_MOUSE Endothelial differentiation-related factor 1 OS=Mus musculus OX=10090 GN=Edf1 PE=1 SV=1	Q9JMG1	Endothelial differentiation-related factor 1	Edf1	121141	184733	253926	91690	112532	55564	108051	55748	131441		8	8	52.7
	sp|Q8BL66|EEA1_MOUSE Early endosome antigen 1 OS=Mus musculus OX=10090 GN=Eea1 PE=1 SV=2	Q8BL66	Early endosome antigen 1	Eea1	558	0	0	781	3918	1360	5133	1049	584		7	7	5.9
	sp|Q921E6-2|EED_MOUSE Isoform 2 of Polycomb protein EED OS=Mus musculus OX=10090 GN=Eed;sp|Q921E6|EED_MOUSE Polycomb protein EED OS=Mus musculus OX=10090 GN=Eed PE=1 SV=1;sp|Q921E6-3|EED_MOUSE Isoform 3 of Polycomb protein EED OS=Mus musculus OX=10090 GN=E	Q921E6-2;Q921E6;Q921E6-3	Polycomb protein EED	Eed	24995	23054	32998	23830	11906	14776	25312	15397	24256		13	13	28
	sp|P10126|EF1A1_MOUSE Elongation factor 1-alpha 1 OS=Mus musculus OX=10090 GN=Eef1a1 PE=1 SV=3	P10126	Elongation factor 1-alpha 1	Eef1a1	16515900	15967900	17086300	13020700	10102500	10929400	13272500	10614900	11866500		37	23	75.5
	sp|O70251|EF1B_MOUSE Elongation factor 1-beta OS=Mus musculus OX=10090 GN=Eef1b PE=1 SV=5;tr|A0A087WS46|A0A087WS46_MOUSE Eukaryotic translation elongation factor 1 beta 2 OS=Mus musculus OX=10090 GN=Eef1b2 PE=1 SV=1	O70251;A0A087WS46;G3UX43;G3UZ47;M0QWK5;M0QWH8	Elongation factor 1-beta	Eef1b;Eef1b2	451557	520468	608072	367539	306052	520747	468183	400367	412708		7	7	55.1
	sp|P57776|EF1D_MOUSE Elongation factor 1-delta OS=Mus musculus OX=10090 GN=Eef1d PE=1 SV=3;sp|P57776-3|EF1D_MOUSE Isoform 3 of Elongation factor 1-delta OS=Mus musculus OX=10090 GN=Eef1d	P57776;P57776-3	Elongation factor 1-delta	Eef1d	715047	1004530	1100540	1033900	906906	955708	1080080	823659	734270		17	4	60.9
	sp|Q9D1M4|MCA3_MOUSE Eukaryotic translation elongation factor 1 epsilon-1 OS=Mus musculus OX=10090 GN=Eef1e1 PE=1 SV=1	Q9D1M4	Eukaryotic translation elongation factor 1 epsilon-1	Eef1e1	70645	75088	90373	41738	35500	84325	110585	95896	39482		8	8	51.7
	sp|Q9D8N0|EF1G_MOUSE Elongation factor 1-gamma OS=Mus musculus OX=10090 GN=Eef1g PE=1 SV=3	Q9D8N0	Elongation factor 1-gamma	Eef1g	1813380	1664740	1897220	1341070	1395800	1256240	1080740	821038	1253720		31	31	62.2
	sp|P58252|EF2_MOUSE Elongation factor 2 OS=Mus musculus OX=10090 GN=Eef2 PE=1 SV=2	P58252	Elongation factor 2	Eef2	2402350	2110920	2345040	1729710	1576210	1487010	1694090	1546790	1727640		70	68	75.1
	sp|Q9JHW4|SELB_MOUSE Selenocysteine-specific elongation factor OS=Mus musculus OX=10090 GN=Eefsec PE=1 SV=2	Q9JHW4	Selenocysteine-specific elongation factor	Eefsec	8304	1803	7324	7779	8952	9131	7971	4484	2647		10	10	23.2
	sp|Q9D8Y0|EFHD2_MOUSE EF-hand domain-containing protein D2 OS=Mus musculus OX=10090 GN=Efhd2 PE=1 SV=1	Q9D8Y0	EF-hand domain-containing protein D2	Efhd2	88295	125712	155822	96007	126098	96729	90659	78264	97280		14	12	65.8
	sp|Q8BG67|EFR3A_MOUSE Protein EFR3 homolog A OS=Mus musculus OX=10090 GN=Efr3a PE=1 SV=1;sp|Q8BG67-2|EFR3A_MOUSE Isoform 2 of Protein EFR3 homolog A OS=Mus musculus OX=10090 GN=Efr3a	Q8BG67;Q8BG67-2	Protein EFR3 homolog A	Efr3a	0	0	1456	1042	2281	3038	3971	2969	1920		3	3	4.4
	sp|Q8C0D5|EFL1_MOUSE Elongation factor-like GTPase 1 OS=Mus musculus OX=10090 GN=Efl1 PE=1 SV=1	Q8C0D5	Elongation factor Tu GTP-binding domain-containing protein 1	Eftud1	1983	6166	3057	2534	1779	2350	6671	1462	4772		8	8	11.8
	sp|O08810|U5S1_MOUSE 116 kDa U5 small nuclear ribonucleoprotein component OS=Mus musculus OX=10090 GN=Eftud2 PE=1 SV=1	O08810	116 kDa U5 small nuclear ribonucleoprotein component	Eftud2	198838	181149	238363	188442	124113	161530	202984	166520	153154		48	48	65.9
	sp|Q9WVK4|EHD1_MOUSE EH domain-containing protein 1 OS=Mus musculus OX=10090 GN=Ehd1 PE=1 SV=1	Q9WVK4	EH domain-containing protein 1	Ehd1	56028	54151	84460	43123	41116	46416	57573	39929	52225		20	13	46.6
	sp|Q9QXY6|EHD3_MOUSE EH domain-containing protein 3 OS=Mus musculus OX=10090 GN=Ehd3 PE=1 SV=2	Q9QXY6	EH domain-containing protein 3	Ehd3	5330	3166	3011	891	752	904	859	1048	2493		10	10	40.2
	sp|Q9EQP2|EHD4_MOUSE EH domain-containing protein 4 OS=Mus musculus OX=10090 GN=Ehd4 PE=1 SV=1	Q9EQP2	EH domain-containing protein 4	Ehd4	13800	10127	15338	15514	12072	8080	13743	4830	15389		13	12	34.4
	sp|Q9Z148-2|EHMT2_MOUSE Isoform 2 of Histone-lysine N-methyltransferase EHMT2 OS=Mus musculus OX=10090 GN=Ehmt2;sp|Q9Z148-3|EHMT2_MOUSE Isoform 3 of Histone-lysine N-methyltransferase EHMT2 OS=Mus musculus OX=10090 GN=Ehmt2;sp|Q9Z148|EHMT2_MOUSE Histone-ly	Q9Z148-2;Q9Z148-3;Q9Z148	Histone-lysine N-methyltransferase EHMT2	Ehmt2	3969	737	272	0	0	326	508	1912	0		5	5	6.6
	sp|P48024|EIF1_MOUSE Eukaryotic translation initiation factor 1 OS=Mus musculus OX=10090 GN=Eif1 PE=1 SV=2	P48024	Eukaryotic translation initiation factor 1	Eif1	203486	222749	245104	125404	123916	226954	181489	264233	164256		6	2	75.2
	sp|Q8BMJ3|IF1AX_MOUSE Eukaryotic translation initiation factor 1A, X-chromosomal OS=Mus musculus OX=10090 GN=Eif1ax PE=2 SV=3	Q8BMJ3;Q60872	Eukaryotic translation initiation factor 1A, X-chromosomal	Eif1ax	262493	175746	142726	213849	219496	93853	14234	109445	21596		5	5	39.6
	sp|Q8BJW6|EIF2A_MOUSE Eukaryotic translation initiation factor 2A OS=Mus musculus OX=10090 GN=Eif2a PE=1 SV=2;sp|Q8BJW6-2|EIF2A_MOUSE Isoform 2 of Eukaryotic translation initiation factor 2A OS=Mus musculus OX=10090 GN=Eif2a	Q8BJW6;Q8BJW6-2	Eukaryotic translation initiation factor 2A;Eukaryotic translation initiation factor 2A, N-terminally processed	Eif2a	59902	63797	65117	42986	39775	29988	56032	43022	38646		18	18	44.4
	sp|Q03963|E2AK2_MOUSE Interferon-induced, double-stranded RNA-activated protein kinase OS=Mus musculus OX=10090 GN=Eif2ak2 PE=1 SV=2	Q03963	Interferon-induced, double-stranded RNA-activated protein kinase	Eif2ak2	3780	6306	7069	2559	2153	2705	6710	2231	4503		4	4	13.2
	sp|Q99LC8|EI2BA_MOUSE Translation initiation factor eIF-2B subunit alpha OS=Mus musculus OX=10090 GN=Eif2b1 PE=1 SV=1	Q99LC8	Translation initiation factor eIF-2B subunit alpha	Eif2b1	48598	30966	34445	28570	23629	14649	30086	17728	21861		7	7	24.6
	sp|Q99LD9|EI2BB_MOUSE Translation initiation factor eIF-2B subunit beta OS=Mus musculus OX=10090 GN=Eif2b2 PE=1 SV=1	Q99LD9	Translation initiation factor eIF-2B subunit beta	Eif2b2	37923	26897	40527	14601	18352	25225	19875	9335	55034		9	9	35.6
	tr|B1AUN2|B1AUN2_MOUSE Eukaryotic translation initiation factor 2B, subunit 3 OS=Mus musculus OX=10090 GN=Eif2b3 PE=1 SV=1;tr|B1AUN3|B1AUN3_MOUSE Eukaryotic translation initiation factor 2B, subunit 3 OS=Mus musculus OX=10090 GN=Eif2b3 PE=1 SV=1;tr|Q3UKV0|	B1AUN2;B1AUN3;Q3UKV0		Eif2b3	12021	3984	27397	17230	2131	12562	22169	14486	8823		14	14	36.7
	sp|Q61749|EI2BD_MOUSE Translation initiation factor eIF-2B subunit delta OS=Mus musculus OX=10090 GN=Eif2b4 PE=1 SV=2;sp|Q61749-2|EI2BD_MOUSE Isoform 2 of Translation initiation factor eIF-2B subunit delta OS=Mus musculus OX=10090 GN=Eif2b4	Q61749;Q61749-2	Translation initiation factor eIF-2B subunit delta	Eif2b4	26784	20907	22555	27291	10374	13144	35023	25745	20629		10	10	27.5
	sp|Q8CHW4|EI2BE_MOUSE Translation initiation factor eIF-2B subunit epsilon OS=Mus musculus OX=10090 GN=Eif2b5 PE=1 SV=1	Q8CHW4	Translation initiation factor eIF-2B subunit epsilon	Eif2b5	0	9455	13683	5538	4345	2119	4490	5909	2373		8	8	20.8
	sp|Q61211|EIF2D_MOUSE Eukaryotic translation initiation factor 2D OS=Mus musculus OX=10090 GN=Eif2d PE=1 SV=3;sp|Q61211-2|EIF2D_MOUSE Isoform 2 of Eukaryotic translation initiation factor 2D OS=Mus musculus OX=10090 GN=Eif2d	Q61211;Q61211-2	Eukaryotic translation initiation factor 2D	Eif2d	6613	6347	10059	5413	10175	10326	8575	4960	6519		8	8	24.4
	sp|Q6ZWX6|IF2A_MOUSE Eukaryotic translation initiation factor 2 subunit 1 OS=Mus musculus OX=10090 GN=Eif2s1 PE=1 SV=3	Q6ZWX6	Eukaryotic translation initiation factor 2 subunit 1	Eif2s1	519701	446432	504043	327177	345329	382195	452984	394644	350888		22	22	68.3
	sp|Q99L45|IF2B_MOUSE Eukaryotic translation initiation factor 2 subunit 2 OS=Mus musculus OX=10090 GN=Eif2s2 PE=1 SV=1	Q99L45	Eukaryotic translation initiation factor 2 subunit 2	Eif2s2	288658	282165	319474	264532	160033	185062	254455	214788	266475		20	20	54.4
	sp|Q9Z0N1|IF2G_MOUSE Eukaryotic translation initiation factor 2 subunit 3, X-linked OS=Mus musculus OX=10090 GN=Eif2s3x PE=1 SV=2	Q9Z0N1	Eukaryotic translation initiation factor 2 subunit 3, X-linked	Eif2s3x	437222	456879	391354	312874	288021	258519	391427	276016	362570		18	6	48.1
	sp|Q9Z0N2|IF2H_MOUSE Eukaryotic translation initiation factor 2 subunit 3, Y-linked OS=Mus musculus OX=10090 GN=Eif2s3y PE=1 SV=2	Q9Z0N2	Eukaryotic translation initiation factor 2 subunit 3, Y-linked	Eif2s3y	20627	24511	34257	14515	15250	16603	17266	14519	27762		4	4	43.4
	sp|P23116|EIF3A_MOUSE Eukaryotic translation initiation factor 3 subunit A OS=Mus musculus OX=10090 GN=Eif3a PE=1 SV=5	P23116	Eukaryotic translation initiation factor 3 subunit A	Eif3a	332894	302175	407786	255520	261090	227802	285019	230497	204565		72	72	47.7
	sp|Q8JZQ9|EIF3B_MOUSE Eukaryotic translation initiation factor 3 subunit B OS=Mus musculus OX=10090 GN=Eif3b PE=1 SV=1	Q8JZQ9	Eukaryotic translation initiation factor 3 subunit B	Eif3b	315065	272333	257811	209496	219563	192838	250809	175306	205292		36	36	54.2
	sp|Q8R1B4|EIF3C_MOUSE Eukaryotic translation initiation factor 3 subunit C OS=Mus musculus OX=10090 GN=Eif3c PE=1 SV=1	Q8R1B4	Eukaryotic translation initiation factor 3 subunit C	Eif3c	203921	184094	233790	179268	154768	147417	225150	162239	164400		36	36	39.5
	sp|O70194|EIF3D_MOUSE Eukaryotic translation initiation factor 3 subunit D OS=Mus musculus OX=10090 GN=Eif3d PE=1 SV=2	O70194	Eukaryotic translation initiation factor 3 subunit D	Eif3d	158724	138072	170798	117165	91761	106257	144514	112249	79147		25	25	57.5
	sp|P60229|EIF3E_MOUSE Eukaryotic translation initiation factor 3 subunit E OS=Mus musculus OX=10090 GN=Eif3e PE=1 SV=1	P60229	Eukaryotic translation initiation factor 3 subunit E	Eif3e	243314	141060	223804	160032	120521	154885	155332	159854	152763		27	27	60.2
	sp|Q9DCH4|EIF3F_MOUSE Eukaryotic translation initiation factor 3 subunit F OS=Mus musculus OX=10090 GN=Eif3f PE=1 SV=2	Q9DCH4	Eukaryotic translation initiation factor 3 subunit F	Eif3f	136318	147823	212740	156703	106643	168268	201421	151127	106229		11	11	40.4
	sp|Q9Z1D1|EIF3G_MOUSE Eukaryotic translation initiation factor 3 subunit G OS=Mus musculus OX=10090 GN=Eif3g PE=1 SV=2	Q9Z1D1	Eukaryotic translation initiation factor 3 subunit G	Eif3g	239031	188954	294292	179077	197030	194118	240581	130090	238925		10	10	43.4
	sp|Q91WK2|EIF3H_MOUSE Eukaryotic translation initiation factor 3 subunit H OS=Mus musculus OX=10090 GN=Eif3h PE=1 SV=1	Q91WK2	Eukaryotic translation initiation factor 3 subunit H	Eif3h	184076	158124	173450	87736	106086	101166	153593	118009	172033		13	13	42.9
	sp|Q9QZD9|EIF3I_MOUSE Eukaryotic translation initiation factor 3 subunit I OS=Mus musculus OX=10090 GN=Eif3i PE=1 SV=1	Q9QZD9	Eukaryotic translation initiation factor 3 subunit I	Eif3i	323242	335632	367681	219483	221788	148716	324027	220114	270327		19	19	78.8
	sp|Q3UGC7|EI3JA_MOUSE Eukaryotic translation initiation factor 3 subunit J-A OS=Mus musculus OX=10090 GN=Eif3j1 PE=2 SV=1;sp|Q66JS6|EI3JB_MOUSE Eukaryotic translation initiation factor 3 subunit J-B OS=Mus musculus OX=10090 GN=Eif3j2 PE=1 SV=1	Q3UGC7;Q66JS6	Eukaryotic translation initiation factor 3 subunit J-A;Eukaryotic translation initiation factor 3 subunit J-B	Eif3j1;Eif3j2	135537	114925	156376	78000	103136	87404	89037	95933	102288		11	11	56.7
	sp|Q9DBZ5|EIF3K_MOUSE Eukaryotic translation initiation factor 3 subunit K OS=Mus musculus OX=10090 GN=Eif3k PE=1 SV=1;sp|Q9DBZ5-2|EIF3K_MOUSE Isoform 2 of Eukaryotic translation initiation factor 3 subunit K OS=Mus musculus OX=10090 GN=Eif3k	Q9DBZ5;Q9DBZ5-2	Eukaryotic translation initiation factor 3 subunit K	Eif3k	157015	127637	233705	149993	113367	193429	164542	172017	145296		8	8	50
	sp|Q8QZY1|EIF3L_MOUSE Eukaryotic translation initiation factor 3 subunit L OS=Mus musculus OX=10090 GN=Eif3l PE=1 SV=1	Q8QZY1	Eukaryotic translation initiation factor 3 subunit L	Eif3l	321372	253984	331548	241496	189847	192794	312545	228242	244675		27	27	52.1
	sp|Q99JX4|EIF3M_MOUSE Eukaryotic translation initiation factor 3 subunit M OS=Mus musculus OX=10090 GN=Eif3m PE=1 SV=1	Q99JX4	Eukaryotic translation initiation factor 3 subunit M	Eif3m	226054	215120	343271	262014	175582	227196	334152	214174	212994		16	16	52.9
	sp|P60843|IF4A1_MOUSE Eukaryotic initiation factor 4A-I OS=Mus musculus OX=10090 GN=Eif4a1 PE=1 SV=1	P60843	Eukaryotic initiation factor 4A-I	Eif4a1	2019300	2448970	2418750	1875650	1897060	1831120	2440790	1925800	1881860		31	14	63.8
	sp|P10630|IF4A2_MOUSE Eukaryotic initiation factor 4A-II OS=Mus musculus OX=10090 GN=Eif4a2 PE=1 SV=2;sp|P10630-2|IF4A2_MOUSE Isoform 2 of Eukaryotic initiation factor 4A-II OS=Mus musculus OX=10090 GN=Eif4a2	P10630;P10630-2	Eukaryotic initiation factor 4A-II;Eukaryotic initiation factor 4A-II, N-terminally processed	Eif4a2	11162	9939	8144	0	0	6092	11582	7247	5307		3	3	41
	sp|Q91VC3|IF4A3_MOUSE Eukaryotic initiation factor 4A-III OS=Mus musculus OX=10090 GN=Eif4a3 PE=1 SV=3	Q91VC3	Eukaryotic initiation factor 4A-III;Eukaryotic initiation factor 4A-III, N-terminally processed	Eif4a3	323486	224086	281069	214547	235824	177462	343163	256076	242922		17	17	54.7
	sp|Q8BGD9|IF4B_MOUSE Eukaryotic translation initiation factor 4B OS=Mus musculus OX=10090 GN=Eif4b PE=1 SV=1	Q8BGD9	Eukaryotic translation initiation factor 4B	Eif4b	100688	112695	131258	84608	99998	98154	96955	73452	102370		14	14	27.5
	sp|P63073|IF4E_MOUSE Eukaryotic translation initiation factor 4E OS=Mus musculus OX=10090 GN=Eif4e PE=1 SV=1	P63073	Eukaryotic translation initiation factor 4E	Eif4e	113261	162347	127067	130186	65938	77517	117563	76053	116191		9	9	45.6
	sp|Q6NZJ6|IF4G1_MOUSE Eukaryotic translation initiation factor 4 gamma 1 OS=Mus musculus OX=10090 GN=Eif4g1 PE=1 SV=1;sp|Q6NZJ6-2|IF4G1_MOUSE Isoform 2 of Eukaryotic translation initiation factor 4 gamma 1 OS=Mus musculus OX=10090 GN=Eif4g1	Q6NZJ6;Q6NZJ6-2	Eukaryotic translation initiation factor 4 gamma 1	Eif4g1	68842	75412	92294	52171	49632	54017	67409	47842	56064		43	38	32.1
	sp|Q62448|IF4G2_MOUSE Eukaryotic translation initiation factor 4 gamma 2 OS=Mus musculus OX=10090 GN=Eif4g2 PE=1 SV=2;sp|Q62448-2|IF4G2_MOUSE Isoform 2 of Eukaryotic translation initiation factor 4 gamma 2 OS=Mus musculus OX=10090 GN=Eif4g2	Q62448;Q62448-2	Eukaryotic translation initiation factor 4 gamma 2	Eif4g2	53472	44140	80900	52938	54232	49498	52246	47349	39396		38	38	51.1
	sp|Q80XI3-2|IF4G3_MOUSE Isoform 2 of Eukaryotic translation initiation factor 4 gamma 3 OS=Mus musculus OX=10090 GN=Eif4g3;sp|Q80XI3-4|IF4G3_MOUSE Isoform 4 of Eukaryotic translation initiation factor 4 gamma 3 OS=Mus musculus OX=10090 GN=Eif4g3;sp|Q80XI3|	Q80XI3-2;Q80XI3-4;Q80XI3;Q80XI3-3	Eukaryotic translation initiation factor 4 gamma 3	Eif4g3	1058	1534	1330	2183	215	660	661	819	963		7	7	9
	sp|Q9WUK2-2|IF4H_MOUSE Isoform Short of Eukaryotic translation initiation factor 4H OS=Mus musculus OX=10090 GN=Eif4h;sp|Q9WUK2|IF4H_MOUSE Eukaryotic translation initiation factor 4H OS=Mus musculus OX=10090 GN=Eif4h PE=1 SV=3	Q9WUK2-2;Q9WUK2	Eukaryotic translation initiation factor 4H	Eif4h	115100	157066	120571	75904	68337	87012	92411	60079	92206		8	8	41.7
	sp|P59325|IF5_MOUSE Eukaryotic translation initiation factor 5 OS=Mus musculus OX=10090 GN=Eif5 PE=1 SV=1	P59325	Eukaryotic translation initiation factor 5	Eif5	144516	104630	156317	124778	84946	122446	145450	110425	136308		15	15	41.3
	sp|P63242|IF5A1_MOUSE Eukaryotic translation initiation factor 5A-1 OS=Mus musculus OX=10090 GN=Eif5a PE=1 SV=2;sp|Q8BGY2|IF5A2_MOUSE Eukaryotic translation initiation factor 5A-2 OS=Mus musculus OX=10090 GN=Eif5a2 PE=1 SV=3	P63242;Q8BGY2	Eukaryotic translation initiation factor 5A-1;Eukaryotic translation initiation factor 5A-2	Eif5a;Eif5a2	1906680	1898510	2681370	1995110	1454770	1989950	1984660	2241520	1811220		13	13	72.7
	sp|Q05D44|IF2P_MOUSE Eukaryotic translation initiation factor 5B OS=Mus musculus OX=10090 GN=Eif5b PE=1 SV=2	Q05D44	Eukaryotic translation initiation factor 5B	Eif5b	21465	21724	35791	25773	28811	15361	28626	24752	32712		28	28	28.2
	sp|O55135|IF6_MOUSE Eukaryotic translation initiation factor 6 OS=Mus musculus OX=10090 GN=Eif6 PE=1 SV=2	O55135	Eukaryotic translation initiation factor 6	Eif6	199345	80419	117805	93457	73394	84523	97912	138303	105088		12	12	53.5
	sp|Q80Y81-2|RNZ2_MOUSE Isoform 2 of Zinc phosphodiesterase ELAC protein 2 OS=Mus musculus OX=10090 GN=Elac2;sp|Q80Y81|RNZ2_MOUSE Zinc phosphodiesterase ELAC protein 2 OS=Mus musculus OX=10090 GN=Elac2 PE=1 SV=1	Q80Y81-2;Q80Y81	Zinc phosphodiesterase ELAC protein 2	Elac2	7637	5842	15474	11566	2908	10932	20947	11023	16157		11	11	21
	sp|P70372|ELAV1_MOUSE ELAV-like protein 1 OS=Mus musculus OX=10090 GN=Elavl1 PE=1 SV=2	P70372	ELAV-like protein 1	Elavl1	257173	364760	420751	364900	247830	315611	347002	226805	280668		14	14	53.4
	sp|Q60775|ELF1_MOUSE ETS-related transcription factor Elf-1 OS=Mus musculus OX=10090 GN=Elf1 PE=1 SV=1	Q60775	ETS-related transcription factor Elf-1	Elf1	3016	0	0	2732	3377	3073	2310	2013	2378		5	4	14.4
	sp|Q8BPU7|ELMO1_MOUSE Engulfment and cell motility protein 1 OS=Mus musculus OX=10090 GN=Elmo1 PE=1 SV=2;sp|Q8BPU7-3|ELMO1_MOUSE Isoform 3 of Engulfment and cell motility protein 1 OS=Mus musculus OX=10090 GN=Elmo1	Q8BPU7;Q8BPU7-3;Q8BPU7-2;Q8BPU7-4	Engulfment and cell motility protein 1	Elmo1	94111	80984	115860	95252	83597	65107	99493	82239	66375		28	23	46.6
	sp|Q8BHL5-2|ELMO2_MOUSE Isoform 2 of Engulfment and cell motility protein 2 OS=Mus musculus OX=10090 GN=Elmo2;sp|Q8BHL5|ELMO2_MOUSE Engulfment and cell motility protein 2 OS=Mus musculus OX=10090 GN=Elmo2 PE=1 SV=1;sp|Q8BHL5-3|ELMO2_MOUSE Isoform 3 of Engu	Q8BHL5-2;Q8BHL5;Q8BHL5-3	Engulfment and cell motility protein 2	Elmo2	2223	2291	5226	607	2831	2196	3360	3795	1724		7	7	19.6
	sp|P60003|ELOF1_MOUSE Transcription elongation factor 1 homolog OS=Mus musculus OX=10090 GN=Elof1 PE=1 SV=1	P60003	Transcription elongation factor 1 homolog	Elof1	37090	25372	38900	26271	26033	36689	34643	37096	36291		1	1	21.7
	sp|Q91WG4-2|ELP2_MOUSE Isoform 2 of Elongator complex protein 2 OS=Mus musculus OX=10090 GN=Elp2;sp|Q91WG4|ELP2_MOUSE Elongator complex protein 2 OS=Mus musculus OX=10090 GN=Elp2 PE=1 SV=1	Q91WG4-2;Q91WG4	Elongator complex protein 2	Elp2	4168	1077	3204	2936	4622	3154	3528	668	1552		9	9	17.4
	sp|Q9CZX0|ELP3_MOUSE Elongator complex protein 3 OS=Mus musculus OX=10090 GN=Elp3 PE=1 SV=1;sp|Q9CZX0-2|ELP3_MOUSE Isoform 2 of Elongator complex protein 3 OS=Mus musculus OX=10090 GN=Elp3	Q9CZX0;Q9CZX0-2	Elongator complex protein 3	Elp3	3569	0	2444	3794	2474	926	1061	5783	1389		6	6	14.8
	sp|Q9ER73|ELP4_MOUSE Elongator complex protein 4 OS=Mus musculus OX=10090 GN=Elp4 PE=1 SV=2	Q9ER73	Elongator complex protein 4	Elp4	8752	0	13156	2071	830	0	17259	2151	0		7	7	20.6
	sp|P21995|EMB_MOUSE Embigin OS=Mus musculus OX=10090 GN=Emb PE=1 SV=2	P21995	Embigin	Emb	101945	96103	78579	86785	97257	117644	107210	85880	71416		8	8	26.4
	sp|Q8C7X2-2|EMC1_MOUSE Isoform 2 of ER membrane protein complex subunit 1 OS=Mus musculus OX=10090 GN=Emc1;sp|Q8C7X2|EMC1_MOUSE ER membrane protein complex subunit 1 OS=Mus musculus OX=10090 GN=Emc1 PE=1 SV=1	Q8C7X2-2;Q8C7X2;Q8C7X2-3	ER membrane protein complex subunit 1	Emc1	12303	5404	9529	11428	5548	9649	12643	15584	9067		15	15	22.8
	sp|Q9CRD2|EMC2_MOUSE ER membrane protein complex subunit 2 OS=Mus musculus OX=10090 GN=Emc2 PE=1 SV=1	Q9CRD2	ER membrane protein complex subunit 2	Emc2	16743	8226	9786	9832	5392	17782	17657	15093	8429		5	5	14.5
	sp|Q99KI3|EMC3_MOUSE ER membrane protein complex subunit 3 OS=Mus musculus OX=10090 GN=Emc3 PE=1 SV=3	Q99KI3	ER membrane protein complex subunit 3	Emc3	9546	8554	9037	6298	0	4953	12594	4943	1987		7	7	33
	sp|O08579|EMD_MOUSE Emerin OS=Mus musculus OX=10090 GN=Emd PE=1 SV=1	O08579	Emerin	Emd	24887	15535	19682	12974	7217	10205	10589	10018	9893		5	5	29
	sp|O35130|NEP1_MOUSE Ribosomal RNA small subunit methyltransferase NEP1 OS=Mus musculus OX=10090 GN=Emg1 PE=1 SV=1	O35130	Ribosomal RNA small subunit methyltransferase NEP1	Emg1	47797	32602	37772	34921	23365	32298	43095	34612	36051		12	12	66
	sp|Q7TNG5|EMAL2_MOUSE Echinoderm microtubule-associated protein-like 2 OS=Mus musculus OX=10090 GN=Eml2 PE=1 SV=1;sp|Q7TNG5-2|EMAL2_MOUSE Isoform 2 of Echinoderm microtubule-associated protein-like 2 OS=Mus musculus OX=10090 GN=Eml2	Q7TNG5;Q7TNG5-2	Echinoderm microtubule-associated protein-like 2	Eml2	6221	11468	9401	5909	7290	3941	10128	8555	6440		6	6	14
	sp|Q8VC03|EMAL3_MOUSE Echinoderm microtubule-associated protein-like 3 OS=Mus musculus OX=10090 GN=Eml3 PE=1 SV=1	Q8VC03	Echinoderm microtubule-associated protein-like 3	Eml3	0	1600	0	1472	1247	1706	2259	1885	0		5	5	9.5
	sp|Q3UMY5-3|EMAL4_MOUSE Isoform 3 of Echinoderm microtubule-associated protein-like 4 OS=Mus musculus OX=10090 GN=Eml4;sp|Q3UMY5|EMAL4_MOUSE Echinoderm microtubule-associated protein-like 4 OS=Mus musculus OX=10090 GN=Eml4 PE=1 SV=1;sp|Q3UMY5-4|EMAL4_MOUSE	Q3UMY5-3;Q3UMY5;Q3UMY5-4;Q3UMY5-2	Echinoderm microtubule-associated protein-like 4	Eml4	7586	5155	3756	7960	8123	6624	65322	8330	5524		9	9	12.8
	sp|O35912|EMP3_MOUSE Epithelial membrane protein 3 OS=Mus musculus OX=10090 GN=Emp3 PE=2 SV=2	O35912	Epithelial membrane protein 3	Emp3	62126	39446	37227	50616	37523	44926	53561	48509	27007		1	1	4.9
	sp|Q03173-6|ENAH_MOUSE Isoform 6 of Protein enabled homolog OS=Mus musculus OX=10090 GN=Enah;sp|Q03173-3|ENAH_MOUSE Isoform 2 of Protein enabled homolog OS=Mus musculus OX=10090 GN=Enah;sp|Q03173-4|ENAH_MOUSE Isoform 3 of Protein enabled homolog OS=Mus mus	Q03173-6;Q03173-3;Q03173-4;Q03173-5;Q03173;Q03173-2	Protein enabled homolog	Enah	8086	3664	9194	8728	4900	4311	10526	3440	5087		10	10	20.5
	sp|Q8C522|ENDD1_MOUSE Endonuclease domain-containing 1 protein OS=Mus musculus OX=10090 GN=Endod1 PE=1 SV=2	Q8C522	Endonuclease domain-containing 1 protein	Endod1	0	2957	7884	2498	1333	2908	4032	2329	1655		4	4	11.2
	sp|O08600|NUCG_MOUSE Endonuclease G, mitochondrial OS=Mus musculus OX=10090 GN=Endog PE=1 SV=1	O08600	Endonuclease G, mitochondrial	Endog	7335	0	2577	2938	0	5532	4488	0	0		4	4	18
	sp|P17182|ENOA_MOUSE Alpha-enolase OS=Mus musculus OX=10090 GN=Eno1 PE=1 SV=3	P17182	Alpha-enolase	Eno1	5993970	4818350	7393670	5164610	4511900	5531180	5158700	4903600	4578960		33	29	78.8
	sp|P21550|ENOB_MOUSE Beta-enolase OS=Mus musculus OX=10090 GN=Eno3 PE=1 SV=3	P21550	Beta-enolase	Eno3	3514	7925	11166	6140	9551	3433	4428	5178	3891		7	6	35.5
	sp|Q8BGB7-2|ENOPH_MOUSE Isoform 2 of Enolase-phosphatase E1 OS=Mus musculus OX=10090 GN=Enoph1;sp|Q8BGB7|ENOPH_MOUSE Enolase-phosphatase E1 OS=Mus musculus OX=10090 GN=Enoph1 PE=1 SV=1	Q8BGB7-2;Q8BGB7	Enolase-phosphatase E1	Enoph1	25678	25135	13062	4152	13707	7877	13478	16072	12958		6	6	28.3
	sp|P55772|ENTP1_MOUSE Ectonucleoside triphosphate diphosphohydrolase 1 OS=Mus musculus OX=10090 GN=Entpd1 PE=1 SV=1	P55772	Ectonucleoside triphosphate diphosphohydrolase 1	Entpd1	1954	3090	4600	0	5309	2621	1986	5497	5598		6	6	15.1
	sp|Q9WUZ9|ENTP5_MOUSE Ectonucleoside triphosphate diphosphohydrolase 5 OS=Mus musculus OX=10090 GN=Entpd5 PE=1 SV=1	Q9WUZ9	Ectonucleoside triphosphate diphosphohydrolase 5	Entpd5	670	2618	3575	2830	3145	1915	4810	2319	1760		5	5	15.9
	sp|Q9JIX0|ENY2_MOUSE Transcription and mRNA export factor ENY2 OS=Mus musculus OX=10090 GN=Eny2 PE=1 SV=1	Q9JIX0	Transcription and mRNA export factor ENY2	Eny2	0	0	8910	5396	0	9032	7146	9485	0		1	1	16.8
	sp|O54839|EOMES_MOUSE Eomesodermin homolog OS=Mus musculus OX=10090 GN=Eomes PE=1 SV=3;sp|O54839-2|EOMES_MOUSE Isoform 2 of Eomesodermin homolog OS=Mus musculus OX=10090 GN=Eomes	O54839;O54839-2;Q64336	Eomesodermin homolog	Eomes	1599	5428	5092	2782	6873	9086	4263	7490	10042		9	9	25.5
	sp|B2RWS6|EP300_MOUSE Histone acetyltransferase p300 OS=Mus musculus OX=10090 GN=Ep300 PE=1 SV=2	B2RWS6	Histone acetyltransferase p300	Ep300	1448	992	4695	1855	3276	2491	3530	1603	4254		13	6	7.9
	sp|P48193-2|41_MOUSE Isoform 2 of Protein 4.1 OS=Mus musculus OX=10090 GN=Epb41;sp|P48193|41_MOUSE Protein 4.1 OS=Mus musculus OX=10090 GN=Epb41 PE=1 SV=2	P48193-2;P48193	Protein 4.1	Epb41	0	3030	1542	1185	4666	0	1171	1411	650		7	7	12.9
	sp|O70318|E41L2_MOUSE Band 4.1-like protein 2 OS=Mus musculus OX=10090 GN=Epb41l2 PE=1 SV=2	O70318	Band 4.1-like protein 2	Epb41l2	755	0	2576	1836	1675	492	965	1067	1109		12	12	18.9
	sp|Q8CGC7|SYEP_MOUSE Bifunctional glutamate/proline--tRNA ligase OS=Mus musculus OX=10090 GN=Eprs PE=1 SV=4	Q8CGC7	Bifunctional glutamate/proline--tRNA ligase;Glutamate--tRNA ligase;Proline--tRNA ligase	Eprs	167531	162602	191525	152543	123278	139149	166483	131087	143727		70	69	58.5
	sp|P42567|EPS15_MOUSE Epidermal growth factor receptor substrate 15 OS=Mus musculus OX=10090 GN=Eps15 PE=1 SV=1	P42567;P42567-2	Epidermal growth factor receptor substrate 15	Eps15	3663	2227	2667	3964	1965	3100	5341	854	2526		13	13	19.5
	sp|Q60902-3|EP15R_MOUSE Isoform 3 of Epidermal growth factor receptor substrate 15-like 1 OS=Mus musculus OX=10090 GN=Eps15l1;sp|Q60902-4|EP15R_MOUSE Isoform 4 of Epidermal growth factor receptor substrate 15-like 1 OS=Mus musculus OX=10090 GN=Eps15l1;sp|Q	Q60902-3;Q60902-4;Q60902-2;Q60902	Epidermal growth factor receptor substrate 15-like 1	Eps15l1	16118	8643	15112	14545	11509	15705	13933	18818	11725		17	17	30.9
	sp|Q08509|EPS8_MOUSE Epidermal growth factor receptor kinase substrate 8 OS=Mus musculus OX=10090 GN=Eps8 PE=1 SV=2	Q08509	Epidermal growth factor receptor kinase substrate 8	Eps8	1434	0	0	1694	1093	991	1492	363	1270		2	2	2.6
	sp|Q9EQH2|ERAP1_MOUSE Endoplasmic reticulum aminopeptidase 1 OS=Mus musculus OX=10090 GN=Erap1 PE=1 SV=2	Q9EQH2	Endoplasmic reticulum aminopeptidase 1	Erap1	107192	127402	160811	98731	102581	95104	122077	110467	117045		40	40	48.9
	sp|O08811|ERCC2_MOUSE General transcription and DNA repair factor IIH helicase subunit XPD OS=Mus musculus OX=10090 GN=Ercc2 PE=1 SV=2	O08811	TFIIH basal transcription factor complex helicase XPD subunit	Ercc2	0	1647	2124	1572	1122	0	0	0	0		1	1	3.3
	sp|Q9QZD4|XPF_MOUSE DNA repair endonuclease XPF OS=Mus musculus OX=10090 GN=Ercc4 PE=1 SV=3	Q9QZD4	DNA repair endonuclease XPF	Ercc4	0	2047	739	0	2391	632	0	0	0		5	5	6.5
	sp|Q8BHK9|ERC6L_MOUSE DNA excision repair protein ERCC-6-like OS=Mus musculus OX=10090 GN=Ercc6l PE=1 SV=1	Q8BHK9	DNA excision repair protein ERCC-6-like	Ercc6l	1685	1151	3277	1498	3369	3492	1816	2251	1997		5	5	4.2
	sp|Q9DC16|ERGI1_MOUSE Endoplasmic reticulum-Golgi intermediate compartment protein 1 OS=Mus musculus OX=10090 GN=Ergic1 PE=1 SV=1	Q9DC16	Endoplasmic reticulum-Golgi intermediate compartment protein 1	Ergic1	32037	23532	19883	26582	11050	19325	27300	20164	12060		7	7	32.4
	sp|P84089|ERH_MOUSE Enhancer of rudimentary homolog OS=Mus musculus OX=10090 GN=Erh PE=1 SV=1	P84089	Enhancer of rudimentary homolog	Erh	13400	34951	37414	23322	5570	49635	20988	37239	7961		2	2	21.2
	sp|Q7TMF2|ERI1_MOUSE 3-5 exoribonuclease 1 OS=Mus musculus OX=10090 GN=Eri1 PE=1 SV=2	Q7TMF2	3-5 exoribonuclease 1	Eri1	15048	9414	19251	17747	15532	14662	23339	14989	37955		7	7	30.1
	tr|E9PY43|E9PY43_MOUSE Glutamate-rich 1 OS=Mus musculus OX=10090 GN=Erich1 PE=1 SV=1	E9PY43		Erich1	1628	1360	1932	1832	1234	1629	2188	1393	1007		1	1	2.7
	sp|Q8BFZ9|ERLN2_MOUSE Erlin-2 OS=Mus musculus OX=10090 GN=Erlin2 PE=1 SV=1	Q8BFZ9;Q91X78	Erlin-2	Erlin2	15722	6579	6025	16286	3012	6306	13358	3506	11297		8	8	30
	sp|Q3UVK0|ERMP1_MOUSE Endoplasmic reticulum metallopeptidase 1 OS=Mus musculus OX=10090 GN=Ermp1 PE=1 SV=2	Q3UVK0;Q3UVK0-2	Endoplasmic reticulum metallopeptidase 1	Ermp1	6120	1884	5127	4081	1979	1628	3304	4769	1370		9	9	14
	sp|Q8R180|ERO1A_MOUSE ERO1-like protein alpha OS=Mus musculus OX=10090 GN=Ero1a PE=1 SV=2	Q8R180	ERO1-like protein alpha	Ero1l	119699	144288	113507	65025	82375	71621	95346	70812	92183		19	18	56
	sp|P57759|ERP29_MOUSE Endoplasmic reticulum resident protein 29 OS=Mus musculus OX=10090 GN=Erp29 PE=1 SV=2	P57759	Endoplasmic reticulum resident protein 29	Erp29	75523	120470	105390	121940	43351	97421	78601	94123	98248		11	11	40.5
	sp|Q9D1Q6|ERP44_MOUSE Endoplasmic reticulum resident protein 44 OS=Mus musculus OX=10090 GN=Erp44 PE=1 SV=1	Q9D1Q6	Endoplasmic reticulum resident protein 44	Erp44	91159	127453	163766	116619	62607	76510	135339	92110	98774		16	16	44.3
	sp|Q9R0P3|ESTD_MOUSE S-formylglutathione hydrolase OS=Mus musculus OX=10090 GN=Esd PE=1 SV=1	Q9R0P3	S-formylglutathione hydrolase	Esd	215751	191440	308393	204556	129970	162543	256316	164647	193077		12	12	69.1
	sp|Q3V1V3|ESF1_MOUSE ESF1 homolog OS=Mus musculus OX=10090 GN=Esf1 PE=1 SV=1	Q3V1V3	ESF1 homolog	Esf1	1988	3326	5223	1608	2563	3463	2148	3280	1717		7	7	10.3
	sp|P60330|ESPL1_MOUSE Separin OS=Mus musculus OX=10090 GN=Espl1 PE=1 SV=1	P60330	Separin	Espl1	192	135	509	107	131	5952	137	119	400		4	4	2.8
	sp|Q3U7R1|ESYT1_MOUSE Extended synaptotagmin-1 OS=Mus musculus OX=10090 GN=Esyt1 PE=1 SV=2;sp|Q3U7R1-2|ESYT1_MOUSE Isoform 2 of Extended synaptotagmin-1 OS=Mus musculus OX=10090 GN=Esyt1	Q3U7R1;Q3U7R1-2	Extended synaptotagmin-1	Esyt1	262810	216289	236190	208362	169423	204542	278180	195222	184169		50	50	54.5
	sp|Q3TZZ7|ESYT2_MOUSE Extended synaptotagmin-2 OS=Mus musculus OX=10090 GN=Esyt2 PE=1 SV=1	Q3TZZ7;Q3TZZ7-2	Extended synaptotagmin-2	Esyt2	6753	9169	10062	6186	6662	6178	11555	6538	7761		19	19	29.7
	sp|Q8BWY3|ERF1_MOUSE Eukaryotic peptide chain release factor subunit 1 OS=Mus musculus OX=10090 GN=Etf1 PE=1 SV=4	Q8BWY3	Eukaryotic peptide chain release factor subunit 1	Etf1	271729	243149	305797	220455	214243	176592	205923	198879	157237		18	18	44.2
	sp|Q99LC5|ETFA_MOUSE Electron transfer flavoprotein subunit alpha, mitochondrial OS=Mus musculus OX=10090 GN=Etfa PE=1 SV=2	Q99LC5	Electron transfer flavoprotein subunit alpha, mitochondrial	Etfa	244494	238592	224860	283395	224321	290880	380961	313454	323208		14	14	54.4
	sp|Q9DCW4|ETFB_MOUSE Electron transfer flavoprotein subunit beta OS=Mus musculus OX=10090 GN=Etfb PE=1 SV=3	Q9DCW4	Electron transfer flavoprotein subunit beta	Etfb	369427	289771	391851	361302	274512	327093	414317	350140	254121		16	16	58.4
	sp|Q921G7|ETFD_MOUSE Electron transfer flavoprotein-ubiquinone oxidoreductase, mitochondrial OS=Mus musculus OX=10090 GN=Etfdh PE=1 SV=1	Q921G7	Electron transfer flavoprotein-ubiquinone oxidoreductase, mitochondrial	Etfdh	5708	10828	10724	15490	10068	18245	14552	6688	10251		10	10	19.2
	sp|Q9D4V0|EKI1_MOUSE Ethanolamine kinase 1 OS=Mus musculus OX=10090 GN=Etnk1 PE=1 SV=2	Q9D4V0	Ethanolamine kinase 1	Etnk1	7434	7092	14834	4217	0	5795	7641	6897	6364		3	3	13.2
	sp|P27577|ETS1_MOUSE Protein C-ets-1 OS=Mus musculus OX=10090 GN=Ets1 PE=1 SV=2	P27577	Protein C-ets-1	Ets1	0	1506	2327	1718	0	2280	2121	2053	2149		2	2	5.9
	sp|Q8R4Z4|ETV3_MOUSE ETS translocation variant 3 OS=Mus musculus OX=10090 GN=Etv3 PE=1 SV=2	Q8R4Z4	ETS translocation variant 3	Etv3	979	0	1194	0	0	0	1060	708	0		1	1	3.5
	sp|Q8VD58|EVI2B_MOUSE Protein EVI2B OS=Mus musculus OX=10090 GN=Evi2b PE=1 SV=1	Q8VD58	Protein EVI2B	Evi2b	0	7317	13224	5603	9082	8017	6413	5482	6896		4	4	10.4
	sp|P70429-2|EVL_MOUSE Isoform 1 of Ena/VASP-like protein OS=Mus musculus OX=10090 GN=Evl;sp|P70429|EVL_MOUSE Ena/VASP-like protein OS=Mus musculus OX=10090 GN=Evl PE=1 SV=2	P70429-2;P70429	Ena/VASP-like protein	Evl	95320	79261	107157	75402	88146	83761	93150	73878	68348		15	15	45.8
	sp|Q61545|EWS_MOUSE RNA-binding protein EWS OS=Mus musculus OX=10090 GN=Ewsr1 PE=1 SV=2	Q61545	RNA-binding protein EWS	Ewsr1	78206	61616	77257	76241	66609	81254	93108	74249	57987		7	7	11.8
	sp|Q8R3S6|EXOC1_MOUSE Exocyst complex component 1 OS=Mus musculus OX=10090 GN=Exoc1 PE=1 SV=4	Q8R3S6	Exocyst complex component 1	Exoc1	2011	0	1458	737	0	546	692	0	0		9	9	16.4
	sp|Q9D4H1|EXOC2_MOUSE Exocyst complex component 2 OS=Mus musculus OX=10090 GN=Exoc2 PE=1 SV=1	Q9D4H1	Exocyst complex component 2	Exoc2	2414	1733	2150	3882	2760	1576	6499	4571	2873		7	7	11.8
	sp|Q6KAR6|EXOC3_MOUSE Exocyst complex component 3 OS=Mus musculus OX=10090 GN=Exoc3 PE=1 SV=2	Q6KAR6	Exocyst complex component 3	Exoc3	2331	0	2427	963	8894	10133	1281	10192	1800		2	2	3.4
	sp|O35382|EXOC4_MOUSE Exocyst complex component 4 OS=Mus musculus OX=10090 GN=Exoc4 PE=1 SV=2	O35382	Exocyst complex component 4	Exoc4	4315	7268	7036	5202	2365	2304	4337	2827	4399		14	14	19.4
	sp|Q3TPX4|EXOC5_MOUSE Exocyst complex component 5 OS=Mus musculus OX=10090 GN=Exoc5 PE=1 SV=2	Q3TPX4	Exocyst complex component 5	Exoc5	672	0	831	1240	0	0	1664	0	576		3	3	5.2
	sp|O35250-2|EXOC7_MOUSE Isoform 2 of Exocyst complex component 7 OS=Mus musculus OX=10090 GN=Exoc7;sp|O35250|EXOC7_MOUSE Exocyst complex component 7 OS=Mus musculus OX=10090 GN=Exoc7 PE=1 SV=2	O35250-2;O35250	Exocyst complex component 7	Exoc7	1835	2290	3254	2701	896	4265	0	3131	1382		8	8	13.9
	sp|Q6PGF7|EXOC8_MOUSE Exocyst complex component 8 OS=Mus musculus OX=10090 GN=Exoc8 PE=1 SV=1	Q6PGF7	Exocyst complex component 8	Exoc8	18345	4073	4114	4142	5511	5543	7795	6269	3479		6	6	11.5
	sp|Q9DAA6-2|EXOS1_MOUSE Isoform 2 of Exosome complex component CSL4 OS=Mus musculus OX=10090 GN=Exosc1;sp|Q9DAA6|EXOS1_MOUSE Exosome complex component CSL4 OS=Mus musculus OX=10090 GN=Exosc1 PE=1 SV=1	Q9DAA6-2;Q9DAA6	Exosome complex component CSL4	Exosc1	20945	9997	11193	8443	17118	8850	18871	35031	33354		3	3	28.6
	sp|P56960|EXOSX_MOUSE Exosome component 10 OS=Mus musculus OX=10090 GN=Exosc10 PE=1 SV=2	P56960	Exosome component 10	Exosc10	22511	14520	24506	11575	12590	14211	17102	20516	9643		21	21	36.4
	sp|Q8VBV3|EXOS2_MOUSE Exosome complex component RRP4 OS=Mus musculus OX=10090 GN=Exosc2 PE=1 SV=1	Q8VBV3	Exosome complex component RRP4	Exosc2	7862	4415	2996	10740	1086	9543	2320	1772	4902		6	6	25.9
	sp|Q7TQK4|EXOS3_MOUSE Exosome complex component RRP40 OS=Mus musculus OX=10090 GN=Exosc3 PE=1 SV=3	Q7TQK4	Exosome complex component RRP40	Exosc3	15067	31591	41546	22536	32050	25326	23528	24910	30658		6	6	42.3
	sp|Q921I9|EXOS4_MOUSE Exosome complex component RRP41 OS=Mus musculus OX=10090 GN=Exosc4 PE=1 SV=3	Q921I9	Exosome complex component RRP41	Exosc4	33393	19062	17087	24183	15182	35862	36076	29227	24573		8	8	38.4
	sp|Q9CRA8|EXOS5_MOUSE Exosome complex component RRP46 OS=Mus musculus OX=10090 GN=Exosc5 PE=1 SV=1	Q9CRA8	Exosome complex component RRP46	Exosc5	26953	25612	39514	15878	26232	38407	38072	32203	30404		5	5	41.7
	sp|Q8BTW3|EXOS6_MOUSE Exosome complex component MTR3 OS=Mus musculus OX=10090 GN=Exosc6 PE=1 SV=1	Q8BTW3	Exosome complex component MTR3	Exosc6	24688	27477	31371	37327	24811	40369	38497	46821	16665		8	8	38.5
	sp|Q9D0M0|EXOS7_MOUSE Exosome complex exonuclease RRP42 OS=Mus musculus OX=10090 GN=Exosc7 PE=1 SV=2	Q9D0M0	Exosome complex exonuclease RRP42	Exosc7	24802	27619	52872	49466	12479	16804	22795	33906	26525		7	7	26.8
	sp|Q9D753|EXOS8_MOUSE Exosome complex component RRP43 OS=Mus musculus OX=10090 GN=Exosc8 PE=1 SV=1	Q9D753	Exosome complex component RRP43	Exosc8	12289	6235	7926	9069	26945	14891	11532	0	12638		6	6	28.3
	sp|Q9JHI7|EXOS9_MOUSE Exosome complex component RRP45 OS=Mus musculus OX=10090 GN=Exosc9 PE=1 SV=1	Q9JHI7	Exosome complex component RRP45	Exosc9	7224	5836	18837	14953	11055	7463	16718	13733	8250		3	3	6.8
	sp|P97480-2|EYA3_MOUSE Isoform 2 of Eyes absent homolog 3 OS=Mus musculus OX=10090 GN=Eya3;sp|P97480|EYA3_MOUSE Eyes absent homolog 3 OS=Mus musculus OX=10090 GN=Eya3 PE=1 SV=2	P97480-2;P97480	Eyes absent homolog 3	Eya3	2816	3628	2433	4203	0	1697	2225	2132	1884		2	2	6.2
	sp|Q61188-2|EZH2_MOUSE Isoform ENX-1B of Histone-lysine N-methyltransferase EZH2 OS=Mus musculus OX=10090 GN=Ezh2;sp|Q61188|EZH2_MOUSE Histone-lysine N-methyltransferase EZH2 OS=Mus musculus OX=10090 GN=Ezh2 PE=1 SV=2	Q61188-2;Q61188;P70351	Histone-lysine N-methyltransferase EZH2	Ezh2	4056	3063	8655	6644	2536	5089	6200	3299	4635		9	9	18.8
	sp|P26040|EZRI_MOUSE Ezrin OS=Mus musculus OX=10090 GN=Ezr PE=1 SV=3	P26040	Ezrin	Ezr	244397	263902	307377	173706	135530	155018	195250	134774	187277		26	25	53.2
	sp|O08914|FAAH1_MOUSE Fatty-acid amide hydrolase 1 OS=Mus musculus OX=10090 GN=Faah PE=1 SV=1	O08914	Fatty-acid amide hydrolase 1	Faah	848	0	0	646	435	0	943	0	745		6	6	18.8
	sp|Q05816|FABP5_MOUSE Fatty acid-binding protein 5 OS=Mus musculus OX=10090 GN=Fabp5 PE=1 SV=3	Q05816	Fatty acid-binding protein, epidermal	Fabp5	901729	804108	907064	801103	820728	749709	851378	578269	778096		9	9	68.9
	sp|Q920L1|FADS1_MOUSE Acyl-CoA (8-3)-desaturase OS=Mus musculus OX=10090 GN=Fads1 PE=1 SV=1	Q920L1	Fatty acid desaturase 1	Fads1	1299	932	1353	1506	1188	0	1348	1178	0		1	1	3.4
	sp|Q9Z0R9|FADS2_MOUSE Acyl-CoA 6-desaturase OS=Mus musculus OX=10090 GN=Fads2 PE=1 SV=1	Q9Z0R9	Fatty acid desaturase 2	Fads2	4787	4776	6742	4809	1700	4164	1941	3877	3025		6	6	14.6
	sp|P54731|FAF1_MOUSE FAS-associated factor 1 OS=Mus musculus OX=10090 GN=Faf1 PE=1 SV=2	P54731	FAS-associated factor 1	Faf1	6242	10117	14400	5686	2642	2734	8668	3087	10238		6	6	12
	sp|Q3TDN2-2|FAF2_MOUSE Isoform 2 of FAS-associated factor 2 OS=Mus musculus OX=10090 GN=Faf2;sp|Q3TDN2|FAF2_MOUSE FAS-associated factor 2 OS=Mus musculus OX=10090 GN=Faf2 PE=1 SV=2	Q3TDN2-2;Q3TDN2	FAS-associated factor 2	Faf2	16467	7632	10077	6792	6094	8568	6090	7068	7662		9	9	28.9
	sp|Q9WUD8|FAIM1_MOUSE Fas apoptotic inhibitory molecule 1 OS=Mus musculus OX=10090 GN=Faim PE=1 SV=1	Q9WUD8	Fas apoptotic inhibitory molecule 1	Faim	11317	4495	19562	4829	4778	0	19312	7858	7291		3	3	31.3
	sp|Q3TGF2|F107B_MOUSE Protein FAM107B OS=Mus musculus OX=10090 GN=Fam107b PE=1 SV=2	Q3TGF2	Protein FAM107B	Fam107b	288058	324948	325711	244208	184395	609361	436145	391182	432533		8	8	52.7
	sp|Q9D2L9|F111A_MOUSE Protein FAM111A OS=Mus musculus OX=10090 GN=Fam111a PE=2 SV=1	Q9D2L9	Protein FAM111A	Fam111a	4142	4082	5024	1177	2144	2241	3630	5773	11306		5	5	11.9
	sp|Q8VE88-2|F1142_MOUSE Isoform 2 of Protein FAM114A2 OS=Mus musculus OX=10090 GN=Fam114a2;sp|Q8VE88|F1142_MOUSE Protein FAM114A2 OS=Mus musculus OX=10090 GN=Fam114a2 PE=1 SV=2	Q8VE88-2;Q8VE88	Protein FAM114A2	Fam114a2	7953	8139	8966	11032	7196	6221	7902	8292	8479		6	6	18.6
	sp|Q6A0A9|F120A_MOUSE Constitutive coactivator of PPAR-gamma-like protein 1 OS=Mus musculus OX=10090 GN=FAM120A PE=1 SV=2	Q6A0A9	Constitutive coactivator of PPAR-gamma-like protein 1	FAM120A	42643	31621	37081	33488	28330	33364	32041	34812	27603		25	25	29.7
	sp|Q6P9N1|HYCCI_MOUSE Hyccin OS=Mus musculus OX=10090 GN=Fam126a PE=1 SV=3;sp|Q6P9N1-2|HYCCI_MOUSE Isoform 2 of Hyccin OS=Mus musculus OX=10090 GN=Fam126a;sp|Q6P9N1-3|HYCCI_MOUSE Isoform 3 of Hyccin OS=Mus musculus OX=10090 GN=Fam126a	Q6P9N1;Q6P9N1-2;Q6P9N1-3	Hyccin	Fam126a	2044	1464	1727	5072	0	2009	0	1620	1405		4	4	11.7
	sp|Q3UW53|NIBA1_MOUSE Protein Niban 1 OS=Mus musculus OX=10090 GN=Niban1 PE=1 SV=2	Q3UW53	Protein Niban	Fam129a	0	0	0	640	1088	0	692	620	754		7	7	8.6
	sp|Q8CDM8|F16B1_MOUSE Protein FAM160B1 OS=Mus musculus OX=10090 GN=Fam160b1 PE=1 SV=2;sp|Q8CDM8-2|F16B1_MOUSE Isoform 2 of Protein FAM160B1 OS=Mus musculus OX=10090 GN=Fam160b1	Q8CDM8;Q8CDM8-2	Protein FAM160B1	Fam160b1	1274	671	1187	1215	1068	1467	1394	843	936		2	2	5.4
	sp|Q9D6U8|F162A_MOUSE Protein FAM162A OS=Mus musculus OX=10090 GN=Fam162a PE=1 SV=1	Q9D6U8	Protein FAM162A	Fam162a	98244	143534	131703	108701	77420	96381	144165	131433	52580		4	4	32.3
	sp|Q8CHT6|F169B_MOUSE Protein FAM169B OS=Mus musculus OX=10090 GN=Fam169b PE=2 SV=1	Q8CHT6	Protein FAM169B	Fam169b	1493	0	0	5352	5305	0	4856	1262	0		3	3	9.8
	sp|Q3TCJ1|ABRX2_MOUSE BRISC complex subunit Abraxas 2 OS=Mus musculus OX=10090 GN=Abraxas2 PE=1 SV=1	Q3TCJ1	BRISC complex subunit Abro1	Fam175b	0	0	3394	4138	2613	2253	2254	2529	2302		3	3	9.9
	sp|Q91WE2|PIP30_MOUSE PSME3-interacting protein OS=Mus musculus OX=10090 GN=Fam192a PE=1 SV=1	Q91WE2	Protein FAM192A	Fam192a	0	16745	15948	20702	24872	12926	2252	14240	16566		6	6	22.4
	sp|Q80ZQ9|ABITM_MOUSE Protein Abitram OS=Mus musculus OX=10090 GN=Abitram PE=1 SV=2	Q80ZQ9	Protein Simiate	Fam206a	0	4700	9432	0	11155	4359	5416	5685	5660		2	2	13
	sp|P58468|F207A_MOUSE Protein FAM207A OS=Mus musculus OX=10090 GN=Fam207a PE=1 SV=1	P58468	Protein FAM207A	Fam207a	41137	34291	33744	25667	15051	33224	20201	12873	32278		6	6	46.1
	sp|Q6PGL7-2|WASC2_MOUSE Isoform 2 of WASH complex subunit 2 OS=Mus musculus OX=10090 GN=Washc2;sp|Q6PGL7|WASC2_MOUSE WASH complex subunit 2 OS=Mus musculus OX=10090 GN=Washc2 PE=1 SV=1	Q6PGL7-2;Q6PGL7	WASH complex subunit FAM21	Fam21	921	698	0	1007	533	774	0	634	0		4	4	5.4
	sp|Q8C9E8|CAHM6_MOUSE Calcium homeostasis modulator protein 6 OS=Mus musculus OX=10090 GN=Calhm6 PE=2 SV=1	Q8C9E8	Protein FAM26F	Fam26f	0	3236	6470	7042	0	2691	0	0	0		3	3	8.6
	sp|Q91VU0|FAM3C_MOUSE Protein FAM3C OS=Mus musculus OX=10090 GN=Fam3c PE=1 SV=1	Q91VU0	Protein FAM3C	Fam3c	0	0	14117	9207	22659	12808	0	23156	18234		2	2	13.2
	sp|Q8BHZ0|FA49A_MOUSE Protein FAM49A OS=Mus musculus OX=10090 GN=Fam49a PE=1 SV=1	Q8BHZ0	Protein FAM49A	Fam49a	0	2388	4171	0	3591	0	1538	3630	0		5	5	26.9
	sp|Q921M7|FA49B_MOUSE Protein FAM49B OS=Mus musculus OX=10090 GN=Fam49b PE=1 SV=1	Q921M7	Protein FAM49B	Fam49b	100241	103870	215170	126104	97386	92068	131985	93737	157602		16	15	61.1
	sp|Q9WV03|FA50A_MOUSE Protein FAM50A OS=Mus musculus OX=10090 GN=Fam50a PE=1 SV=1	Q9WV03;Q9WTJ8	Protein FAM50A	Fam50a	19193	22909	19514	14910	10017	12024	13612	18045	27936		5	5	18.3
	sp|Q80XP8|FA76B_MOUSE Protein FAM76B OS=Mus musculus OX=10090 GN=Fam76b PE=1 SV=1	Q80XP8;Q80XP8-2	Protein FAM76B	Fam76b	7557	2769	3175	8947	4920	10397	5714	0	8209		7	6	22.7
	sp|Q3TJZ6|FA98A_MOUSE Protein FAM98A OS=Mus musculus OX=10090 GN=Fam98a PE=1 SV=1	Q3TJZ6	Protein FAM98A	Fam98a	18243	14410	17321	17254	10961	7809	20611	14142	14149		6	6	20
	sp|Q80VD1|FA98B_MOUSE Protein FAM98B OS=Mus musculus OX=10090 GN=Fam98b PE=1 SV=1	Q80VD1	Protein FAM98B	Fam98b	15058	53404	51365	50517	37898	50507	43194	60808	36429		11	10	34.3
	sp|Q922J9|FACR1_MOUSE Fatty acyl-CoA reductase 1 OS=Mus musculus OX=10090 GN=Far1 PE=1 SV=1;sp|Q922J9-4|FACR1_MOUSE Isoform 4 of Fatty acyl-CoA reductase 1 OS=Mus musculus OX=10090 GN=Far1;sp|Q922J9-3|FACR1_MOUSE Isoform 3 of Fatty acyl-CoA reductase 1 OS=	Q922J9;Q922J9-4;Q922J9-3;Q922J9-2	Fatty acyl-CoA reductase 1	Far1	44046	28974	28640	24848	15006	19833	49150	15454	35207		12	12	29.9
	sp|Q8C0C7|SYFA_MOUSE Phenylalanine--tRNA ligase alpha subunit OS=Mus musculus OX=10090 GN=Farsa PE=1 SV=1	Q8C0C7	Phenylalanine--tRNA ligase alpha subunit	Farsa	144274	126570	162599	115585	119836	115048	167146	106073	115666		14	14	34.8
	sp|Q9WUA2|SYFB_MOUSE Phenylalanine--tRNA ligase beta subunit OS=Mus musculus OX=10090 GN=Farsb PE=1 SV=2	Q9WUA2	Phenylalanine--tRNA ligase beta subunit	Farsb	165550	159735	227981	145804	119669	103110	192267	126505	135844		24	24	47.2
	sp|P19096|FAS_MOUSE Fatty acid synthase OS=Mus musculus OX=10090 GN=Fasn PE=1 SV=2	P19096	Fatty acid synthase;[Acyl-carrier-protein] S-acetyltransferase;[Acyl-carrier-protein] S-malonyltransferase;3-oxoacyl-[acyl-carrier-protein] synthase;3-oxoacyl-[acyl-carrier-protein] reductase;3-hydroxyacyl-[acyl-carrier-protein] dehydratase;Enoyl-[acyl-carrier-protein] reductase;Oleoyl-[acyl-carrier-protein] hydrolase	Fasn	363441	325169	380557	316387	255265	328946	336227	292391	267953		124	124	62.1
	sp|Q7TMV3|FAKD5_MOUSE FAST kinase domain-containing protein 5, mitochondrial OS=Mus musculus OX=10090 GN=Fastkd5 PE=2 SV=1	Q7TMV3	FAST kinase domain-containing protein 5	Fastkd5	626	606	283	530	0	0	720	479	411		1	1	1.8
	sp|P62862|RS30_MOUSE 40S ribosomal protein S30 OS=Mus musculus OX=10090 GN=Fau PE=1 SV=1	P62862	40S ribosomal protein S30	Fau	1228520	1033820	981617	763765	638413	720812	804542	737072	748693		4	4	32.2
	sp|P35550|FBRL_MOUSE rRNA 2-O-methyltransferase fibrillarin OS=Mus musculus OX=10090 GN=Fbl PE=1 SV=2	P35550	rRNA 2-O-methyltransferase fibrillarin	Fbl	517474	429160	704359	481930	466023	435572	664462	486297	528421		18	13	59
	sp|Q80WS3|FBLL1_MOUSE rRNA/tRNA 2-O-methyltransferase fibrillarin-like protein 1 OS=Mus musculus OX=10090 GN=Fbll1 PE=1 SV=1	Q80WS3	rRNA/tRNA 2-O-methyltransferase fibrillarin-like protein 1	Fbll1	21209	12659	7093	11114	5246	0	39508	63343	0		1	1	20.4
	sp|Q8CIG9|FBXL8_MOUSE F-box/LRR-repeat protein 8 OS=Mus musculus OX=10090 GN=Fbxl8 PE=1 SV=1	Q8CIG9	F-box/LRR-repeat protein 8	Fbxl8	1369	0	1348	0	0	1210	0	1759	2259		5	5	19.8
	sp|Q8BIG4|FBX28_MOUSE F-box only protein 28 OS=Mus musculus OX=10090 GN=Fbxo28 PE=1 SV=1	Q8BIG4	F-box only protein 28	Fbxo28	1618	0	2755	1708	1661	1185	0	1917	1360		2	2	6.2
	sp|Q8BMI0|FBX38_MOUSE F-box only protein 38 OS=Mus musculus OX=10090 GN=Fbxo38 PE=1 SV=1	Q8BMI0	F-box only protein 38	Fbxo38	10333	8652	0	6419	5974	0	7547	6062	5037		3	3	3.9
	sp|Q7TSG3|FBX5_MOUSE F-box only protein 5 OS=Mus musculus OX=10090 GN=Fbxo5 PE=1 SV=1	Q7TSG3	F-box only protein 5	Fbxo5	0	0	1020	1353	1095	923	881	0	671		1	1	2.4
	sp|Q9QZN4|FBX6_MOUSE F-box only protein 6 OS=Mus musculus OX=10090 GN=Fbxo6 PE=1 SV=1	Q9QZN4	F-box only protein 6	Fbxo6	5673	0	814	738	2183	2571	5773	2421	2555		4	4	19
	sp|Q3U7U3|FBX7_MOUSE F-box only protein 7 OS=Mus musculus OX=10090 GN=Fbxo7 PE=1 SV=2	Q3U7U3	F-box only protein 7	Fbxo7	1391	0	0	852	890	0	1742	1083	0		1	1	2.3
	sp|Q9CTH6|FCF1_MOUSE rRNA-processing protein FCF1 homolog OS=Mus musculus OX=10090 GN=Fcf1 PE=2 SV=2	Q9CTH6	rRNA-processing protein FCF1 homolog	Fcf1	35572	31671	38564	32344	17105	16961	39005	15905	30158		3	3	19.2
	sp|Q8K285|FCHO1_MOUSE F-BAR domain only protein 1 OS=Mus musculus OX=10090 GN=Fcho1 PE=1 SV=2	Q8K285	F-BAR domain only protein 1	Fcho1	734	723	655	1004	3852	947	3483	2431	0		8	8	12.7
	sp|Q920E5|FPPS_MOUSE Farnesyl pyrophosphate synthase OS=Mus musculus OX=10090 GN=Fdps PE=1 SV=1	Q920E5	Farnesyl pyrophosphate synthase	Fdps	169859	196617	230608	137484	155947	172466	180900	93673	192826		14	14	42.5
	sp|Q61578|ADRO_MOUSE NADPH:adrenodoxin oxidoreductase, mitochondrial OS=Mus musculus OX=10090 GN=Fdxr PE=1 SV=1	Q61578	NADPH:adrenodoxin oxidoreductase, mitochondrial	Fdxr	4295	0	6020	1555	0	0	3520	7325	7586		8	8	23.7
	sp|P39749|FEN1_MOUSE Flap endonuclease 1 OS=Mus musculus OX=10090 GN=Fen1 PE=1 SV=1	P39749	Flap endonuclease 1	Fen1	169374	105181	103611	126202	153564	96229	189238	152088	108120		13	13	40.2
	sp|Q8K1B8|URP2_MOUSE Fermitin family homolog 3 OS=Mus musculus OX=10090 GN=Fermt3 PE=1 SV=1	Q8K1B8	Fermitin family homolog 3	Fermt3	284180	253594	293751	249349	143477	196046	298433	178156	201334		34	34	59.2
	sp|O88842|FGD3_MOUSE FYVE, RhoGEF and PH domain-containing protein 3 OS=Mus musculus OX=10090 GN=Fgd3 PE=1 SV=1;sp|O88842-2|FGD3_MOUSE Isoform 2 of FYVE, RhoGEF and PH domain-containing protein 3 OS=Mus musculus OX=10090 GN=Fgd3	O88842;O88842-2	FYVE, RhoGEF and PH domain-containing protein 3	Fgd3	0	0	2151	2118	0	1391	0	1261	453		5	5	10.5
	sp|P12804|FGL2_MOUSE Fibroleukin OS=Mus musculus OX=10090 GN=Fgl2 PE=1 SV=1	P12804	Fibroleukin	Fgl2	0	2834	4239	4477	3662	0	0	0	3651		3	3	8.3
	sp|P97807-2|FUMH_MOUSE Isoform Cytoplasmic of Fumarate hydratase, mitochondrial OS=Mus musculus OX=10090 GN=Fh;sp|P97807|FUMH_MOUSE Fumarate hydratase, mitochondrial OS=Mus musculus OX=10090 GN=Fh PE=1 SV=3	P97807-2;P97807	Fumarate hydratase, mitochondrial	Fh	126676	128104	202384	155550	137567	150272	151609	121716	136466		17	17	56.3
	sp|Q9R059|FHL3_MOUSE Four and a half LIM domains protein 3 OS=Mus musculus OX=10090 GN=Fhl3 PE=1 SV=2	Q9R059	Four and a half LIM domains protein 3	Fhl3	2758	3393	2863	8556	14897	5686	3402	6584	4750		4	4	23.9
	sp|Q9D824-3|FIP1_MOUSE Isoform 3 of Pre-mRNA 3-end-processing factor FIP1 OS=Mus musculus OX=10090 GN=Fip1l1;sp|Q9D824-2|FIP1_MOUSE Isoform 2 of Pre-mRNA 3-end-processing factor FIP1 OS=Mus musculus OX=10090 GN=Fip1l1;sp|Q9D824|FIP1_MOUSE Pre-mRNA 3-end	Q9D824-3;Q9D824-2;Q9D824;Q9D824-4	Pre-mRNA 3-end-processing factor FIP1	Fip1l1	16948	18654	15358	22549	14624	19237	22559	19540	11427		10	10	37.5
	sp|Q9CQ92|FIS1_MOUSE Mitochondrial fission 1 protein OS=Mus musculus OX=10090 GN=Fis1 PE=1 SV=1	Q9CQ92	Mitochondrial fission 1 protein	Fis1	95231	77888	85638	88340	74259	83800	98661	86663	58016		5	5	42.1
	sp|Q6P9Q6|FKB15_MOUSE FK506-binding protein 15 OS=Mus musculus OX=10090 GN=Fkbp15 PE=1 SV=2;sp|Q6P9Q6-2|FKB15_MOUSE Isoform B of FK506-binding protein 15 OS=Mus musculus OX=10090 GN=Fkbp15	Q6P9Q6;Q6P9Q6-2	FK506-binding protein 15	Fkbp15	0	3302	8238	3299	4375	2018	2522	499	4744		10	10	16.6
	sp|P26883|FKB1A_MOUSE Peptidyl-prolyl cis-trans isomerase FKBP1A OS=Mus musculus OX=10090 GN=Fkbp1a PE=1 SV=2	P26883	Peptidyl-prolyl cis-trans isomerase FKBP1A	Fkbp1a	545569	593880	663432	486792	455850	520526	540068	442350	398018		5	5	49.1
	sp|P45878|FKBP2_MOUSE Peptidyl-prolyl cis-trans isomerase FKBP2 OS=Mus musculus OX=10090 GN=Fkbp2 PE=1 SV=1	P45878	Peptidyl-prolyl cis-trans isomerase FKBP2	Fkbp2	204096	251888	315467	213667	192627	241222	206466	212140	220758		5	5	57.1
	sp|Q62446|FKBP3_MOUSE Peptidyl-prolyl cis-trans isomerase FKBP3 OS=Mus musculus OX=10090 GN=Fkbp3 PE=1 SV=2	Q62446	Peptidyl-prolyl cis-trans isomerase FKBP3	Fkbp3	513975	589204	596465	420103	345998	363570	509715	348469	518346		11	11	50.4
	sp|P30416|FKBP4_MOUSE Peptidyl-prolyl cis-trans isomerase FKBP4 OS=Mus musculus OX=10090 GN=Fkbp4 PE=1 SV=5	P30416	Peptidyl-prolyl cis-trans isomerase FKBP4;Peptidyl-prolyl cis-trans isomerase FKBP4, N-terminally processed	Fkbp4	305451	288806	404195	344749	296924	180726	385481	158886	284290		35	35	72.9
	sp|Q64378|FKBP5_MOUSE Peptidyl-prolyl cis-trans isomerase FKBP5 OS=Mus musculus OX=10090 GN=Fkbp5 PE=1 SV=1	Q64378	Peptidyl-prolyl cis-trans isomerase FKBP5;Peptidyl-prolyl cis-trans isomerase FKBP5, N-terminally processed	Fkbp5	154285	142652	159708	93007	74900	99807	146429	83059	95416		23	23	45.8
	sp|O35465|FKBP8_MOUSE Peptidyl-prolyl cis-trans isomerase FKBP8 OS=Mus musculus OX=10090 GN=Fkbp8 PE=1 SV=2;sp|O35465-2|FKBP8_MOUSE Isoform 2 of Peptidyl-prolyl cis-trans isomerase FKBP8 OS=Mus musculus OX=10090 GN=Fkbp8	O35465;O35465-2	Peptidyl-prolyl cis-trans isomerase FKBP8	Fkbp8	48649	52928	74040	43875	39467	66478	62925	53570	53767		9	9	25.9
	sp|Q8R123|FAD1_MOUSE FAD synthase OS=Mus musculus OX=10090 GN=Flad1 PE=1 SV=1;sp|Q8R123-2|FAD1_MOUSE Isoform 2 of FAD synthase OS=Mus musculus OX=10090 GN=Flad1	Q8R123;Q8R123-2	FAD synthase;Molybdenum cofactor biosynthesis protein-like region;FAD synthase region	Flad1	0	0	2145	0	3576	3178	0	4445	2942		3	3	9.3
	sp|P26323|FLI1_MOUSE Friend leukemia integration 1 transcription factor OS=Mus musculus OX=10090 GN=Fli1 PE=1 SV=1	P26323	Friend leukemia integration 1 transcription factor	Fli1	3734	11333	15807	9097	13539	5331	14194	7284	10577		9	9	37.2
	sp|Q9JJ28|FLII_MOUSE Protein flightless-1 homolog OS=Mus musculus OX=10090 GN=Flii PE=1 SV=1	Q9JJ28	Protein flightless-1 homolog	Flii	31613	27620	39422	26089	31487	25824	31700	23806	33438		34	34	35.9
	sp|Q8BTM8|FLNA_MOUSE Filamin-A OS=Mus musculus OX=10090 GN=Flna PE=1 SV=5	Q8BTM8;Q8BTM8-2	Filamin-A	Flna	265070	228659	295381	173611	171888	172007	222110	206338	224192		115	104	60.9
	sp|Q80X90|FLNB_MOUSE Filamin-B OS=Mus musculus OX=10090 GN=Flnb PE=1 SV=3	Q80X90	Filamin-B	Flnb	2506	201	2012	1228	247	816	1778	842	1367		21	20	15.4
	sp|O08917|FLOT1_MOUSE Flotillin-1 OS=Mus musculus OX=10090 GN=Flot1 PE=1 SV=1	O08917	Flotillin-1	Flot1	2384	1006	4514	1880	2238	442	3490	2334	2980		6	6	20.3
	sp|Q60634-3|FLOT2_MOUSE Isoform 3 of Flotillin-2 OS=Mus musculus OX=10090 GN=Flot2;sp|Q60634-2|FLOT2_MOUSE Isoform 2 of Flotillin-2 OS=Mus musculus OX=10090 GN=Flot2;sp|Q60634|FLOT2_MOUSE Flotillin-2 OS=Mus musculus OX=10090 GN=Flot2 PE=1 SV=2	Q60634-3;Q60634-2;Q60634	Flotillin-2	Flot2	0	1973	12130	9439	5086	6195	26026	22905	20364		7	7	25.6
	sp|Q9JL26|FMNL1_MOUSE Formin-like protein 1 OS=Mus musculus OX=10090 GN=Fmnl1 PE=1 SV=1;sp|Q9JL26-2|FMNL1_MOUSE Isoform 2 of Formin-like protein 1 OS=Mus musculus OX=10090 GN=Fmnl1	Q9JL26;Q9JL26-2;A2APV2-2;A2APV2;A2APV2-3;Q6ZPF4-2;Q6ZPF4	Formin-like protein 1	Fmnl1	112789	98205	158269	123186	111220	100378	106924	108180	105018		47	47	45.8
	sp|P35922-3|FMR1_MOUSE Isoform 3 of Synaptic functional regulator FMR1 OS=Mus musculus OX=10090 GN=Fmr1;sp|P35922-2|FMR1_MOUSE Isoform 2 of Synaptic functional regulator FMR1 OS=Mus musculus OX=10090 GN=Fmr1;sp|P35922|FMR1_MOUSE Synaptic functional regulat	P35922-3;P35922-2;P35922;P35922-5;P35922-4;P35922-6;P35922-9;P35922-8;P35922-7;P35922-11;P35922-10;P35922-12	Fragile X mental retardation protein 1 homolog	Fmr1	5443	5509	6186	5222	2928	10960	3741	9481	6673		11	11	26.7
	sp|P11276|FINC_MOUSE Fibronectin OS=Mus musculus OX=10090 GN=Fn1 PE=1 SV=4	P11276	Fibronectin;Anastellin	Fn1	155	0	3588	0	950	775	1570	2165	1335		8	8	4.4
	sp|Q80TY0-2|FNBP1_MOUSE Isoform 2 of Formin-binding protein 1 OS=Mus musculus OX=10090 GN=Fnbp1;sp|Q80TY0-3|FNBP1_MOUSE Isoform 3 of Formin-binding protein 1 OS=Mus musculus OX=10090 GN=Fnbp1;sp|Q80TY0|FNBP1_MOUSE Formin-binding protein 1 OS=Mus musculus O	Q80TY0-2;Q80TY0-3;Q80TY0;Q80TY0-4;Q80TY0-5	Formin-binding protein 1	Fnbp1	98627	108205	127322	68327	63989	64141	98224	65412	108257		16	16	35.5
	sp|Q6ZQ03|FNBP4_MOUSE Formin-binding protein 4 OS=Mus musculus OX=10090 GN=Fnbp4 PE=1 SV=2;sp|Q6ZQ03-2|FNBP4_MOUSE Isoform 2 of Formin-binding protein 4 OS=Mus musculus OX=10090 GN=Fnbp4;sp|Q6ZQ03-3|FNBP4_MOUSE Isoform 3 of Formin-binding protein 4 OS=Mus	Q6ZQ03;Q6ZQ03-2;Q6ZQ03-3	Formin-binding protein 4	Fnbp4	3190	2383	2594	3101	2021	2160	4410	2623	2050		7	7	9.7
	sp|Q8BX90|FND3A_MOUSE Fibronectin type-III domain-containing protein 3A OS=Mus musculus OX=10090 GN=Fndc3a PE=1 SV=3	Q8BX90	Fibronectin type-III domain-containing protein 3A	Fndc3a	888	972	605	507	211	274	653	391	395		4	4	3.4
	sp|Q61239|FNTA_MOUSE Protein farnesyltransferase/geranylgeranyltransferase type-1 subunit alpha OS=Mus musculus OX=10090 GN=Fnta PE=1 SV=1	Q61239	Protein farnesyltransferase/geranylgeranyltransferase type-1 subunit alpha	Fnta	5002	4550	5186	1105	1090	3022	1997	1926	2578		5	5	18
	sp|Q8K2I1|FNTB_MOUSE Protein farnesyltransferase subunit beta OS=Mus musculus OX=10090 GN=Fntb PE=1 SV=1	Q8K2I1	Protein farnesyltransferase subunit beta	Fntb	0	3780	1150	1189	0	0	1329	542	1029		2	2	6.4
	sp|A2AKG8|FOCAD_MOUSE Focadhesin OS=Mus musculus OX=10090 GN=Focad PE=1 SV=1	A2AKG8;A2AKG8-3	Focadhesin	Focad	0	0	1112	718	0	684	871	0	644		6	6	5.9
	sp|P42128|FOXK1_MOUSE Forkhead box protein K1 OS=Mus musculus OX=10090 GN=Foxk1 PE=1 SV=2	P42128;O88470;Q3UCQ1-2;Q3UCQ1	Forkhead box protein K1	Foxk1	1315	1840	6738	1818	957	0	2413	0	1671		4	4	12.5
	sp|P58462-4|FOXP1_MOUSE Isoform 4 of Forkhead box protein P1 OS=Mus musculus OX=10090 GN=Foxp1;sp|P58462|FOXP1_MOUSE Forkhead box protein P1 OS=Mus musculus OX=10090 GN=Foxp1 PE=1 SV=1;sp|P58462-3|FOXP1_MOUSE Isoform 3 of Forkhead box protein P1 OS=Mus mus	P58462-4;P58462;P58462-3;P58462-2;P58462-5	Forkhead box protein P1	Foxp1	1210	0	2285	2758	1347	2531	738	4322	1472		5	5	13.9
	sp|P97376|FRG1_MOUSE Protein FRG1 OS=Mus musculus OX=10090 GN=Frg1 PE=1 SV=2	P97376	Protein FRG1	Frg1	29311	17374	0	9734	44305	47211	17026	44539	29358		8	8	37.2
	sp|Q3UFK8|FRMD8_MOUSE FERM domain-containing protein 8 OS=Mus musculus OX=10090 GN=Frmd8 PE=1 SV=2	Q3UFK8	FERM domain-containing protein 8	Frmd8	2943	3255	4936	2165	2368	2980	2727	2098	24828		5	5	17.2
	tr|F8VQ05|F8VQ05_MOUSE FRY-like transcription coactivator OS=Mus musculus OX=10090 GN=Fryl PE=1 SV=1	F8VQ05;A0A0J9YUH4;A0A0J9YTS1;A0A0J9YUJ6;F6SDM9;A0A0J9YU33;F6Q1V8		Fryl	1369	500	1503	1204	1404	1362	1521	1127	1335		15	15	7.7
	sp|A2ARZ3|FSIP2_MOUSE Fibrous sheath-interacting protein 2 OS=Mus musculus OX=10090 GN=Fsip2 PE=1 SV=3	A2ARZ3	Fibrous sheath-interacting protein 2	Fsip2	182	98	109	10128	406	0	100	109	95		4	4	1
	sp|P09528|FRIH_MOUSE Ferritin heavy chain OS=Mus musculus OX=10090 GN=Fth1 PE=1 SV=2	P09528	Ferritin heavy chain;Ferritin heavy chain, N-terminally processed	Fth1	67403	47425	99413	54788	18620	167854	92315	110440	43712		7	7	53.8
	sp|P29391|FRIL1_MOUSE Ferritin light chain 1 OS=Mus musculus OX=10090 GN=Ftl1 PE=1 SV=2;sp|P49945|FRIL2_MOUSE Ferritin light chain 2 OS=Mus musculus OX=10090 GN=Ftl2 PE=3 SV=2	P29391;P49945	Ferritin light chain 1;Ferritin light chain 2	Ftl1;Ftl2	82104	65749	228605	105591	89883	288779	39682	207080	103155		8	8	52.5
	sp|Q8BGW1|FTO_MOUSE Alpha-ketoglutarate-dependent dioxygenase FTO OS=Mus musculus OX=10090 GN=Fto PE=1 SV=1;sp|Q8BGW1-2|FTO_MOUSE Isoform 2 of Alpha-ketoglutarate-dependent dioxygenase FTO OS=Mus musculus OX=10090 GN=Fto;sp|Q8BGW1-3|FTO_MOUSE Isoform 3 of	Q8BGW1;Q8BGW1-2;Q8BGW1-3	Alpha-ketoglutarate-dependent dioxygenase FTO	Fto	952	565	7125	716	587	3880	1077	717	2842		2	2	5.8
	tr|Q8JZY1|Q8JZY1_MOUSE Putative tRNA (cytidine(32)/guanosine(34)-2-O)-methyltransferase OS=Mus musculus OX=10090 GN=Ftsj1 PE=1 SV=1;tr|Q8CBC7|Q8CBC7_MOUSE Putative tRNA (cytidine(32)/guanosine(34)-2-O)-methyltransferase OS=Mus musculus OX=10090 GN=Ftsj1	Q8JZY1;Q8CBC7;F6Q475;A2ALH2	Putative tRNA (cytidine(32)/guanosine(34)-2-O)-methyltransferase	Ftsj1	3641	0	9945	6088	3912	5280	4862	5068	0		3	3	13.7
	sp|Q9DBE9|SPB1_MOUSE pre-rRNA 2-O-ribose RNA methyltransferase FTSJ3 OS=Mus musculus OX=10090 GN=Ftsj3 PE=1 SV=1	Q9DBE9	pre-rRNA processing protein FTSJ3	Ftsj3	25813	22139	26252	12882	10610	5989	9834	14195	16153		20	20	36.2
	sp|Q91WJ8|FUBP1_MOUSE Far upstream element-binding protein 1 OS=Mus musculus OX=10090 GN=Fubp1 PE=1 SV=1;sp|Q91WJ8-2|FUBP1_MOUSE Isoform 2 of Far upstream element-binding protein 1 OS=Mus musculus OX=10090 GN=Fubp1	Q91WJ8;Q91WJ8-2	Far upstream element-binding protein 1	Fubp1	126470	116815	173434	133338	121194	182271	142605	166518	139177		19	19	38.2
	tr|A2AJ72|A2AJ72_MOUSE Far upstream element (FUSE)-binding protein 3 OS=Mus musculus OX=10090 GN=Fubp3 PE=1 SV=1;tr|Q3TIX6|Q3TIX6_MOUSE Far upstream element (FUSE)-binding protein 3 OS=Mus musculus OX=10090 GN=Fubp3 PE=1 SV=1	A2AJ72;Q3TIX6;A0A0A6YVV5;F7AM43;A0A0A6YY39		Fubp3	1688	0	1465	0	0	0	3708	0	2620		5	5	13
	sp|Q9D6K8|FUND2_MOUSE FUN14 domain-containing protein 2 OS=Mus musculus OX=10090 GN=Fundc2 PE=1 SV=1	Q9D6K8	FUN14 domain-containing protein 2	Fundc2	25003	14605	0	72945	15690	67823	32085	34965	15103		3	3	30.5
	sp|P56959|FUS_MOUSE RNA-binding protein FUS OS=Mus musculus OX=10090 GN=Fus PE=1 SV=1	P56959	RNA-binding protein FUS	Fus	319327	415769	480444	351128	397451	321261	357763	256042	341143		12	10	24.1
	sp|Q9WTS2|FUT8_MOUSE Alpha-(1,6)-fucosyltransferase OS=Mus musculus OX=10090 GN=Fut8 PE=1 SV=2	Q9WTS2	Alpha-(1,6)-fucosyltransferase	Fut8	1952	0	2382	1378	0	1938	3307	0	1804		3	3	5
	sp|Q61584-4|FXR1_MOUSE Isoform C of Fragile X mental retardation syndrome-related protein 1 OS=Mus musculus OX=10090 GN=Fxr1;sp|Q61584-7|FXR1_MOUSE Isoform G of Fragile X mental retardation syndrome-related protein 1 OS=Mus musculus OX=10090 GN=Fxr1;sp|Q61	Q61584-4;Q61584-7;Q61584-3;Q61584;Q61584-2;Q61584-5;Q61584-6	Fragile X mental retardation syndrome-related protein 1	Fxr1	61012	39646	50747	34519	36456	38710	56392	44229	38565		14	13	29.1
	sp|Q9WVR4|FXR2_MOUSE Fragile X mental retardation syndrome-related protein 2 OS=Mus musculus OX=10090 GN=Fxr2 PE=1 SV=1	Q9WVR4	Fragile X mental retardation syndrome-related protein 2	Fxr2	1698	1736	1668	1573	1321	1810	2873	1501	2372		3	3	7.1
	sp|O35601-2|FYB1_MOUSE Isoform FYB-120 of FYN-binding protein 1 OS=Mus musculus OX=10090 GN=Fyb1;sp|O35601|FYB1_MOUSE FYN-binding protein 1 OS=Mus musculus OX=10090 GN=Fyb1 PE=1 SV=2	O35601-2;O35601	FYN-binding protein	Fyb	28709	14244	21643	22038	21863	12280	15231	11407	15050		17	17	29.9
	sp|P39688-2|FYN_MOUSE Isoform 2 of Tyrosine-protein kinase Fyn OS=Mus musculus OX=10090 GN=Fyn;sp|P39688|FYN_MOUSE Tyrosine-protein kinase Fyn OS=Mus musculus OX=10090 GN=Fyn PE=1 SV=4	P39688-2;P39688;Q04736;P05480;P25911-2;P08103-2;P25911;P08103	Tyrosine-protein kinase Fyn	Fyn	6624	4374	11384	10008	10702	3587	14936	11877	10547		7	7	20.2
	sp|P97855|G3BP1_MOUSE Ras GTPase-activating protein-binding protein 1 OS=Mus musculus OX=10090 GN=G3bp1 PE=1 SV=1	P97855	Ras GTPase-activating protein-binding protein 1	G3bp1	334034	317349	330029	233110	168296	192383	258751	220624	235783		24	23	53.1
	sp|P97379|G3BP2_MOUSE Ras GTPase-activating protein-binding protein 2 OS=Mus musculus OX=10090 GN=G3bp2 PE=1 SV=2;sp|P97379-2|G3BP2_MOUSE Isoform B of Ras GTPase-activating protein-binding protein 2 OS=Mus musculus OX=10090 GN=G3bp2	P97379;P97379-2	Ras GTPase-activating protein-binding protein 2	G3bp2	13502	50763	128271	21217	14763	3535	57255	15656	32462		12	12	36.5
	sp|Q6NSQ9|G6PC3_MOUSE Glucose-6-phosphatase 3 OS=Mus musculus OX=10090 GN=G6pc3 PE=1 SV=1	Q6NSQ9	Glucose-6-phosphatase 3	G6pc3	2284	0	0	2264	1825	1868	1994	1459	0		1	1	4.3
	sp|Q00612|G6PD1_MOUSE Glucose-6-phosphate 1-dehydrogenase X OS=Mus musculus OX=10090 GN=G6pdx PE=1 SV=3	Q00612;P97324	Glucose-6-phosphate 1-dehydrogenase X	G6pdx	49422	44333	80408	38551	21260	45761	63778	48418	57657		24	24	50.7
	sp|P60521|GBRL2_MOUSE Gamma-aminobutyric acid receptor-associated protein-like 2 OS=Mus musculus OX=10090 GN=Gabarapl2 PE=1 SV=1	P60521	Gamma-aminobutyric acid receptor-associated protein-like 2	Gabarapl2	11159	5263	26832	8492	39386	17182	11931	15312	54589		6	5	60.7
	sp|Q00422|GABPA_MOUSE GA-binding protein alpha chain OS=Mus musculus OX=10090 GN=Gabpa PE=1 SV=2	Q00422	GA-binding protein alpha chain	Gabpa	6178	6520	18502	17910	12795	10294	13179	14617	14210		11	11	39.4
	sp|Q99KY4-2|GAK_MOUSE Isoform 2 of Cyclin-G-associated kinase OS=Mus musculus OX=10090 GN=Gak;sp|Q99KY4|GAK_MOUSE Cyclin-G-associated kinase OS=Mus musculus OX=10090 GN=Gak PE=1 SV=2	Q99KY4-2;Q99KY4;Q80TZ3-2;Q80TZ3;Q80TZ3-3	Cyclin-G-associated kinase	Gak	4432	406	8300	7766	4126	5238	7277	1979	5268		16	16	17.2
	sp|Q8R059|GALE_MOUSE UDP-glucose 4-epimerase OS=Mus musculus OX=10090 GN=Gale PE=1 SV=1	Q8R059	UDP-glucose 4-epimerase	Gale	3348	3881	3646	3551	0	1712	3299	1732	4111		4	4	23.9
	sp|Q9R0N0|GALK1_MOUSE Galactokinase OS=Mus musculus OX=10090 GN=Galk1 PE=1 SV=2	Q9R0N0	Galactokinase	Galk1	112098	97021	169983	117435	97207	113504	140801	96096	141895		13	13	35.2
	sp|Q68FH4|GALK2_MOUSE N-acetylgalactosamine kinase OS=Mus musculus OX=10090 GN=Galk2 PE=1 SV=1	Q68FH4	N-acetylgalactosamine kinase	Galk2	4218	1864	4501	6418	3513	5355	10409	3348	1660		6	6	20.1
	sp|Q571E4|GALNS_MOUSE N-acetylgalactosamine-6-sulfatase OS=Mus musculus OX=10090 GN=Galns PE=1 SV=2	Q571E4	N-acetylgalactosamine-6-sulfatase	Galns	3094	0	0	2237	1026	2090	2548	1533	1830		4	4	13.3
	sp|O08912|GALT1_MOUSE Polypeptide N-acetylgalactosaminyltransferase 1 OS=Mus musculus OX=10090 GN=Galnt1 PE=1 SV=1	O08912;Q8CF93;Q8CF93-2	Polypeptide N-acetylgalactosaminyltransferase 1;Polypeptide N-acetylgalactosaminyltransferase 1 soluble form	Galnt1	5729	3617	1691	8244	5987	9569	8010	7919	6361		10	10	21.5
	sp|Q6PB93-2|GALT2_MOUSE Isoform 2 of Polypeptide N-acetylgalactosaminyltransferase 2 OS=Mus musculus OX=10090 GN=Galnt2;sp|Q6PB93|GALT2_MOUSE Polypeptide N-acetylgalactosaminyltransferase 2 OS=Mus musculus OX=10090 GN=Galnt2 PE=1 SV=1	Q6PB93-2;Q6PB93	Polypeptide N-acetylgalactosaminyltransferase 2;Polypeptide N-acetylgalactosaminyltransferase 2 soluble form	Galnt2	1850	2126	0	5436	688	2281	3735	2481	0		5	5	11.6
	sp|P70419|GALT3_MOUSE Polypeptide N-acetylgalactosaminyltransferase 3 OS=Mus musculus OX=10090 GN=Galnt3 PE=1 SV=3;sp|Q8C7U7|GALT6_MOUSE Polypeptide N-acetylgalactosaminyltransferase 6 OS=Mus musculus OX=10090 GN=Galnt6 PE=2 SV=1	P70419;Q8C7U7	Polypeptide N-acetylgalactosaminyltransferase 3;Polypeptide N-acetylgalactosaminyltransferase 6	Galnt3;Galnt6	0	2018	3441	0	0	0	1123	0	1652		2	2	4.4
	sp|Q80VA0|GALT7_MOUSE N-acetylgalactosaminyltransferase 7 OS=Mus musculus OX=10090 GN=Galnt7 PE=1 SV=2;sp|Q80VA0-2|GALT7_MOUSE Isoform 2 of N-acetylgalactosaminyltransferase 7 OS=Mus musculus OX=10090 GN=Galnt7	Q80VA0;Q80VA0-2;Q80VA0-3	N-acetylgalactosaminyltransferase 7	Galnt7	10119	1196	4946	6241	13891	11148	6661	8873	7448		11	11	22.8
	sp|Q8BHN3|GANAB_MOUSE Neutral alpha-glucosidase AB OS=Mus musculus OX=10090 GN=Ganab PE=1 SV=1;sp|Q8BHN3-2|GANAB_MOUSE Isoform 2 of Neutral alpha-glucosidase AB OS=Mus musculus OX=10090 GN=Ganab;sp|Q8BHN3-3|GANAB_MOUSE Isoform 3 of Neutral alpha-glucosidas	Q8BHN3;Q8BHN3-2;Q8BHN3-3	Neutral alpha-glucosidase AB	Ganab	199635	169147	176638	170783	102909	127417	199788	167969	160966		37	37	53.2
	sp|P16858|G3P_MOUSE Glyceraldehyde-3-phosphate dehydrogenase OS=Mus musculus OX=10090 GN=Gapdh PE=1 SV=2	P16858;Q64467	Glyceraldehyde-3-phosphate dehydrogenase	Gapdh	1689660	1516530	1809080	1375320	1277290	1351320	1772730	1136930	1215940		34	34	89.5
	sp|Q6PAR5-5|GAPD1_MOUSE Isoform 5 of GTPase-activating protein and VPS9 domain-containing protein 1 OS=Mus musculus OX=10090 GN=Gapvd1;sp|Q6PAR5-2|GAPD1_MOUSE Isoform 2 of GTPase-activating protein and VPS9 domain-containing protein 1 OS=Mus musculus OX=10	Q6PAR5-5;Q6PAR5-2;Q6PAR5-6;Q6PAR5;Q6PAR5-4;Q6PAR5-3	GTPase-activating protein and VPS9 domain-containing protein 1	Gapvd1	4942	1016	8110	2408	5573	2948	5313	1154	4606		16	16	15.3
	sp|Q9CY66-3|GAR1_MOUSE Isoform 3 of H/ACA ribonucleoprotein complex subunit 1 OS=Mus musculus OX=10090 GN=Gar1;sp|Q9CY66-2|GAR1_MOUSE Isoform 2 of H/ACA ribonucleoprotein complex subunit 1 OS=Mus musculus OX=10090 GN=Gar1;sp|Q9CY66|GAR1_MOUSE H/ACA ribonuc	Q9CY66-3;Q9CY66-2;Q9CY66	H/ACA ribonucleoprotein complex subunit 1	Gar1	170559	145933	164485	144174	118843	130838	167018	151798	148096		6	6	25.8
	sp|Q9CZD3|GARS_MOUSE Glycine--tRNA ligase OS=Mus musculus OX=10090 GN=Gars PE=1 SV=1	Q9CZD3	Glycine--tRNA ligase	Gars	121696	142835	155771	66093	73440	75657	67553	89707	77830		34	34	47.9
	sp|Q64737|PUR2_MOUSE Trifunctional purine biosynthetic protein adenosine-3 OS=Mus musculus OX=10090 GN=Gart PE=1 SV=3	Q64737;Q64737-2	Trifunctional purine biosynthetic protein adenosine-3;Phosphoribosylamine--glycine ligase;Phosphoribosylformylglycinamidine cyclo-ligase;Phosphoribosylglycinamide formyltransferase	Gart	214570	215869	260636	177314	173804	149888	189733	146257	199296		47	47	58.7
	sp|Q8CHY6|P66A_MOUSE Transcriptional repressor p66 alpha OS=Mus musculus OX=10090 GN=Gatad2a PE=1 SV=2	Q8CHY6	Transcriptional repressor p66 alpha	Gatad2a	27438	21129	22179	18370	20618	19034	28280	18899	23792		15	15	33.1
	sp|Q8VHR5|P66B_MOUSE Transcriptional repressor p66-beta OS=Mus musculus OX=10090 GN=Gatad2b PE=1 SV=1;sp|Q8VHR5-2|P66B_MOUSE Isoform 2 of Transcriptional repressor p66-beta OS=Mus musculus OX=10090 GN=Gatad2b	Q8VHR5;Q8VHR5-2	Transcriptional repressor p66-beta	Gatad2b	17618	18260	21324	30676	14998	23956	34569	23448	18109		11	11	27.6
	sp|Q9D964|GATM_MOUSE Glycine amidinotransferase, mitochondrial OS=Mus musculus OX=10090 GN=Gatm PE=1 SV=1	Q9D964	Glycine amidinotransferase, mitochondrial	Gatm	4035	3672	5107	5202	4242	4269	4715	3907	4379		4	4	16.5
	sp|P17439|GLCM_MOUSE Lysosomal acid glucosylceramidase OS=Mus musculus OX=10090 GN=Gba PE=1 SV=1	P17439	Glucosylceramidase	Gba	9721	11462	11098	11210	15317	15542	13379	12922	9073		9	9	26
	sp|Q9D6Y9|GLGB_MOUSE 1,4-alpha-glucan-branching enzyme OS=Mus musculus OX=10090 GN=Gbe1 PE=1 SV=1	Q9D6Y9	1,4-alpha-glucan-branching enzyme	Gbe1	3111	3567	2789	1250	0	2639	2652	2470	950		6	6	11
	tr|Q6DFZ1|Q6DFZ1_MOUSE Golgi-specific brefeldin A-resistance factor 1 OS=Mus musculus OX=10090 GN=Gbf1 PE=1 SV=1;tr|Q6A099|Q6A099_MOUSE MKIAA0248 protein (Fragment) OS=Mus musculus OX=10090 GN=Gbf1 PE=1 SV=1	Q6DFZ1;Q6A099;H3BLN1		Gbf1	1801	2093	3876	3744	1392	4432	3257	3965	3300		14	14	11.3
	sp|Q9Z0E6|GBP2_MOUSE Guanylate-binding protein 2 OS=Mus musculus OX=10090 GN=Gbp2 PE=1 SV=1	Q9Z0E6;Q01514	Interferon-induced guanylate-binding protein 2	Gbp2	173503	206188	269371	184830	195920	187517	347431	252505	287159		21	20	44.5
	sp|Q61107|GBP4_MOUSE Guanylate-binding protein 4 OS=Mus musculus OX=10090 GN=Gbp4 PE=1 SV=1	Q61107;D3YVW6;D3YUH5	Guanylate-binding protein 4	Gbp4	7141	13646	38514	28191	15589	14837	17954	22741	24378		17	17	38.9
	sp|Q8CFB4|GBP5_MOUSE Guanylate-binding protein 5 OS=Mus musculus OX=10090 GN=Gbp5 PE=1 SV=2;sp|Q8CFB4-2|GBP5_MOUSE Isoform 2 of Guanylate-binding protein 5 OS=Mus musculus OX=10090 GN=Gbp5	Q8CFB4;Q8CFB4-2	Guanylate-binding protein 5	Gbp5	13629	11415	8760	20114	19326	16572	33060	29014	27590		12	12	29
	tr|Q91Z40|Q91Z40_MOUSE Gbp6 protein OS=Mus musculus OX=10090 GN=Gbp7 PE=1 SV=2	Q91Z40		Gbp7	139513	139121	165524	139817	105838	101357	173150	140330	173969		31	28	56.3
	sp|O88986|KBL_MOUSE 2-amino-3-ketobutyrate coenzyme A ligase, mitochondrial OS=Mus musculus OX=10090 GN=Gcat PE=1 SV=2	O88986	2-amino-3-ketobutyrate coenzyme A ligase, mitochondrial	Gcat	29165	29054	16316	25772	15286	38962	35516	27896	18573		10	10	42.3
	sp|Q8CHG3|GCC2_MOUSE GRIP and coiled-coil domain-containing protein 2 OS=Mus musculus OX=10090 GN=Gcc2 PE=1 SV=2	Q8CHG3	GRIP and coiled-coil domain-containing protein 2	Gcc2	0	0	351	217	0	208	0	445	378		3	3	2.1
	sp|P97494|GSH1_MOUSE Glutamate--cysteine ligase catalytic subunit OS=Mus musculus OX=10090 GN=Gclc PE=1 SV=4	P97494	Glutamate--cysteine ligase catalytic subunit	Gclc	1224	0	5078	2570	4059	4565	0	1863	4728		5	5	11.6
	sp|O09172|GSH0_MOUSE Glutamate--cysteine ligase regulatory subunit OS=Mus musculus OX=10090 GN=Gclm PE=1 SV=1	O09172	Glutamate--cysteine ligase regulatory subunit	Gclm	54625	47358	62329	64853	21550	50763	61807	56481	43263		7	7	30.7
	sp|E9PVA8|GCN1_MOUSE eIF-2-alpha kinase activator GCN1 OS=Mus musculus OX=10090 GN=Gcn1 PE=1 SV=1	E9PVA8		Gcn1l1	24349	18645	33583	23927	15535	15034	30785	17959	19481		72	72	34.1
	sp|P50396|GDIA_MOUSE Rab GDP dissociation inhibitor alpha OS=Mus musculus OX=10090 GN=Gdi1 PE=1 SV=3	P50396	Rab GDP dissociation inhibitor alpha	Gdi1	3625	1730	2066	2501	5035	2328	5243	2693	6862		4	4	33.1
	sp|Q61598|GDIB_MOUSE Rab GDP dissociation inhibitor beta OS=Mus musculus OX=10090 GN=Gdi2 PE=1 SV=1;sp|Q61598-2|GDIB_MOUSE Isoform 2 of Rab GDP dissociation inhibitor beta OS=Mus musculus OX=10090 GN=Gdi2	Q61598;Q61598-2	Rab GDP dissociation inhibitor beta	Gdi2	644351	664027	861580	602824	601969	578455	661565	500410	627134		37	29	80.2
	tr|Q6P6L6|Q6P6L6_MOUSE Gem (Nuclear organelle) associated protein 4 OS=Mus musculus OX=10090 GN=Gemin4 PE=1 SV=1	Q6P6L6		Gemin4	4124	1484	7231	4994	2908	6223	5135	4547	3137		10	10	12.5
	sp|Q8BX17|GEMI5_MOUSE Gem-associated protein 5 OS=Mus musculus OX=10090 GN=Gemin5 PE=1 SV=2	Q8BX17	Gem-associated protein 5	Gemin5	9847	6259	8553	8524	4685	4223	6882	5034	5316		18	18	17.6
	sp|Q9CX53|GEMI6_MOUSE Gem-associated protein 6 OS=Mus musculus OX=10090 GN=Gemin6 PE=1 SV=2	Q9CX53	Gem-associated protein 6	Gemin6	0	0	0	5377	0	8327	6979	0	4432		2	2	15.7
	sp|Q9D1H7|GET4_MOUSE Golgi to ER traffic protein 4 homolog OS=Mus musculus OX=10090 GN=Get4 PE=1 SV=2;sp|Q9D1H7-2|GET4_MOUSE Isoform 2 of Golgi to ER traffic protein 4 homolog OS=Mus musculus OX=10090 GN=Get4	Q9D1H7;Q9D1H7-2	Golgi to ER traffic protein 4 homolog	Get4	6543	6519	13412	6664	13350	4216	10876	4097	6321		4	4	16.8
	sp|Q8K0D5|EFGM_MOUSE Elongation factor G, mitochondrial OS=Mus musculus OX=10090 GN=Gfm1 PE=1 SV=1	Q8K0D5	Elongation factor G, mitochondrial	Gfm1	12050	11649	17929	16269	12330	11083	23248	19215	12663		13	13	23
	sp|Q8R2Q4-3|RRF2M_MOUSE Isoform 3 of Ribosome-releasing factor 2, mitochondrial OS=Mus musculus OX=10090 GN=Gfm2;sp|Q8R2Q4-2|RRF2M_MOUSE Isoform 2 of Ribosome-releasing factor 2, mitochondrial OS=Mus musculus OX=10090 GN=Gfm2;sp|Q8R2Q4|RRF2M_MOUSE Ribosome	Q8R2Q4-3;Q8R2Q4-2;Q8R2Q4	Ribosome-releasing factor 2, mitochondrial	Gfm2	4896	857	0	1517	2548	1085	1735	973	1223		3	3	5.2
	sp|P47856-2|GFPT1_MOUSE Isoform 2 of Glutamine--fructose-6-phosphate aminotransferase [isomerizing] 1 OS=Mus musculus OX=10090 GN=Gfpt1;sp|P47856|GFPT1_MOUSE Glutamine--fructose-6-phosphate aminotransferase [isomerizing] 1 OS=Mus musculus OX=10090 GN=Gfpt1	P47856-2;P47856	Glutamine--fructose-6-phosphate aminotransferase [isomerizing] 1	Gfpt1	67560	64438	80557	50459	37442	42356	58223	35168	45334		29	22	51.1
	sp|Q8R0H9|GGA1_MOUSE ADP-ribosylation factor-binding protein GGA1 OS=Mus musculus OX=10090 GN=Gga1 PE=1 SV=1	Q8R0H9	ADP-ribosylation factor-binding protein GGA1	Gga1	5005	5277	1896	6748	6887	3485	6230	7753	3715		5	5	13.4
	sp|Q9D7X8|GGCT_MOUSE Gamma-glutamylcyclotransferase OS=Mus musculus OX=10090 GN=Ggct PE=1 SV=1	Q9D7X8	Gamma-glutamylcyclotransferase	Ggct	9014	9032	29195	6959	6652	0	0	11735	18914		4	4	25
	sp|Q91VC9|GHITM_MOUSE Growth hormone-inducible transmembrane protein OS=Mus musculus OX=10090 GN=Ghitm PE=1 SV=1	Q91VC9	Growth hormone-inducible transmembrane protein	Ghitm	15672	6051	6263	15406	13168	13759	14093	18004	17966		3	3	9
	sp|Q6Y7W8|GGYF2_MOUSE GRB10-interacting GYF protein 2 OS=Mus musculus OX=10090 GN=Gigyf2 PE=1 SV=2;sp|Q6Y7W8-2|GGYF2_MOUSE Isoform 2 of GRB10-interacting GYF protein 2 OS=Mus musculus OX=10090 GN=Gigyf2	Q6Y7W8;Q6Y7W8-2	PERQ amino acid-rich with GYF domain-containing protein 2	Gigyf2	1140	1317	1106	2239	866	2936	969	1735	499		6	6	7.7
	sp|P70224|GIMA1_MOUSE GTPase IMAP family member 1 OS=Mus musculus OX=10090 GN=Gimap1 PE=1 SV=3	P70224	GTPase IMAP family member 1	Gimap1	11130	2982	7515	7805	6239	15373	4385	9927	9279		4	4	21.3
	sp|Q99MI6|GIMA3_MOUSE GTPase IMAP family member 3 OS=Mus musculus OX=10090 GN=Gimap3 PE=1 SV=2	Q99MI6	GTPase IMAP family member 3	Gimap3	6292	2656	4167	22884	1678	15995	14124	7705	3479		6	3	24.9
	sp|Q99JY3|GIMA4_MOUSE GTPase IMAP family member 4 OS=Mus musculus OX=10090 GN=Gimap4 PE=1 SV=2;sp|Q99JY3-2|GIMA4_MOUSE Isoform 2 of GTPase IMAP family member 4 OS=Mus musculus OX=10090 GN=Gimap4	Q99JY3;Q99JY3-2	GTPase IMAP family member 4	Gimap4	696880	812425	949597	795019	864149	804053	948415	650501	1051000		28	28	72.3
	tr|Q8R379|Q8R379_MOUSE GTPase, IMAP family member 7 OS=Mus musculus OX=10090 GN=Gimap7 PE=1 SV=1	Q8R379;A0A0N4SVT7		Gimap7	220015	222663	223571	263356	122175	217829	300692	244380	313181		15	13	45.7
	sp|Q75N62|GIMA8_MOUSE GTPase IMAP family member 8 OS=Mus musculus OX=10090 GN=Gimap8 PE=1 SV=1	Q75N62	GTPase IMAP family member 8	Gimap8	7392	4159	17216	4706	5313	4452	5305	881	9670		11	11	22.4
	sp|G3X987|GIMA9_MOUSE GTPase IMAP family member 9 OS=Mus musculus OX=10090 GN=Gimap9 PE=1 SV=1	G3X987		Gimap9	76446	90019	84323	94305	76258	82837	95398	88438	110709		16	16	62.2
	sp|Q9CY94|PSF3_MOUSE DNA replication complex GINS protein PSF3 OS=Mus musculus OX=10090 GN=Gins3 PE=2 SV=1	Q9CY94	DNA replication complex GINS protein PSF3	Gins3	0	1994	0	2648	3142	6412	1520	2528	0		4	4	18.1
	sp|Q99LZ3|SLD5_MOUSE DNA replication complex GINS protein SLD5 OS=Mus musculus OX=10090 GN=Gins4 PE=1 SV=1	Q99LZ3	DNA replication complex GINS protein SLD5;DNA replication complex GINS protein SLD5, N-terminally processed	Gins4	0	1686	4670	3309	2247	2650	0	1445	7203		4	4	21.5
	sp|Q9Z0G0|GIPC1_MOUSE PDZ domain-containing protein GIPC1 OS=Mus musculus OX=10090 GN=Gipc1 PE=1 SV=1	Q9Z0G0	PDZ domain-containing protein GIPC1	Gipc1	4951	0	0	5607	3342	3370	12930	3490	2784		4	4	21
	sp|Q9Z2H7|GIPC2_MOUSE PDZ domain-containing protein GIPC2 OS=Mus musculus OX=10090 GN=Gipc2 PE=1 SV=1	Q9Z2H7	PDZ domain-containing protein GIPC2	Gipc2	1276	1115	0	0	0	0	1370	0	1958		1	1	5.4
	sp|Q68FF6|GIT1_MOUSE ARF GTPase-activating protein GIT1 OS=Mus musculus OX=10090 GN=Git1 PE=1 SV=1	Q68FF6	ARF GTPase-activating protein GIT1	Git1	1721	0	885	2731	913	1266	2879	1479	0		5	5	13.2
	sp|Q9JLQ2|GIT2_MOUSE ARF GTPase-activating protein GIT2 OS=Mus musculus OX=10090 GN=Git2 PE=1 SV=2	Q9JLQ2	ARF GTPase-activating protein GIT2	Git2	14373	14767	23230	26697	17602	13174	29175	8091	16526		19	16	34.7
	sp|Q64516-1|GLPK_MOUSE Isoform 1 of Glycerol kinase OS=Mus musculus OX=10090 GN=Gk;sp|Q64516-2|GLPK_MOUSE Isoform 2 of Glycerol kinase OS=Mus musculus OX=10090 GN=Gk;sp|Q64516|GLPK_MOUSE Glycerol kinase OS=Mus musculus OX=10090 GN=Gk PE=1 SV=2;sp|Q9WU65|GL	Q64516-1;Q64516-2;Q64516;Q9WU65	Glycerol kinase;Glycerol kinase 2	Gk;Gk2	1460	1571	2388	2152	2035	1654	2109	1561	1643		4	4	9.5
	sp|P23780|BGAL_MOUSE Beta-galactosidase OS=Mus musculus OX=10090 GN=Glb1 PE=1 SV=1	P23780	Beta-galactosidase	Glb1	4818	0	1730	6420	2209	4423	2894	1825	1170		8	8	14.5
	sp|Q61543|GSLG1_MOUSE Golgi apparatus protein 1 OS=Mus musculus OX=10090 GN=Glg1 PE=1 SV=1	Q61543	Golgi apparatus protein 1	Glg1	14907	19640	15948	16148	13487	12951	11963	7587	17095		22	22	25.4
	sp|Q9CWG1|GLIP1_MOUSE Glioma pathogenesis-related protein 1 OS=Mus musculus OX=10090 GN=Glipr1 PE=2 SV=1	Q9CWG1	Glioma pathogenesis-related protein 1	Glipr1	12464	8577	8862	7488	4715	6462	7354	8069	5734		2	2	9.4
	sp|Q9CYL5|GAPR1_MOUSE Golgi-associated plant pathogenesis-related protein 1 OS=Mus musculus OX=10090 GN=Glipr2 PE=1 SV=3	Q9CYL5	Golgi-associated plant pathogenesis-related protein 1	Glipr2	389862	476496	498518	389822	371644	307023	359974	306757	339376		9	9	78.6
	sp|Q8BZM1|GLMN_MOUSE Glomulin OS=Mus musculus OX=10090 GN=Glmn PE=1 SV=1	Q8BZM1	Glomulin	Glmn	2710	4960	11180	3911	1890	4165	3620	6972	7196		8	8	14.6
	sp|Q9CPU0|LGUL_MOUSE Lactoylglutathione lyase OS=Mus musculus OX=10090 GN=Glo1 PE=1 SV=3	Q9CPU0	Lactoylglutathione lyase	Glo1	54448	53149	64691	41554	32370	97942	68020	19495	49024		6	6	33.7
	sp|Q9CPV4-3|GLOD4_MOUSE Isoform 3 of Glyoxalase domain-containing protein 4 OS=Mus musculus OX=10090 GN=Glod4;sp|Q9CPV4|GLOD4_MOUSE Glyoxalase domain-containing protein 4 OS=Mus musculus OX=10090 GN=Glod4 PE=1 SV=1;sp|Q9CPV4-2|GLOD4_MOUSE Isoform 2 of Glyo	Q9CPV4-3;Q9CPV4;Q9CPV4-2	Glyoxalase domain-containing protein 4	Glod4	58393	56128	103233	65932	36497	85687	89022	31198	92652		12	12	51.3
	sp|Q9QUH0|GLRX1_MOUSE Glutaredoxin-1 OS=Mus musculus OX=10090 GN=Glrx PE=1 SV=3	Q9QUH0	Glutaredoxin-1	Glrx	44872	63767	74898	39675	52109	84284	61481	81813	0		4	4	43.9
	sp|Q9CQM9|GLRX3_MOUSE Glutaredoxin-3 OS=Mus musculus OX=10090 GN=Glrx3 PE=1 SV=1	Q9CQM9	Glutaredoxin-3	Glrx3	272916	244976	393499	210257	237475	204193	279923	202783	202902		15	15	56.7
	sp|D3Z7P3-2|GLSK_MOUSE Isoform 2 of Glutaminase kidney isoform, mitochondrial OS=Mus musculus OX=10090 GN=Gls;sp|D3Z7P3|GLSK_MOUSE Glutaminase kidney isoform, mitochondrial OS=Mus musculus OX=10090 GN=Gls PE=1 SV=1	D3Z7P3-2;D3Z7P3	Glutaminase kidney isoform, mitochondrial	Gls	96987	48236	88241	100633	73819	88893	113599	85318	72332		19	19	47.6
	sp|Q9JL62|GLTP_MOUSE Glycolipid transfer protein OS=Mus musculus OX=10090 GN=Gltp PE=1 SV=3	Q9JL62	Glycolipid transfer protein	Gltp	0	3747	10092	7543	9404	29934	4136	8380	5302		4	4	19.1
	sp|Q8BK35|NOP53_MOUSE Ribosome biogenesis protein NOP53 OS=Mus musculus OX=10090 GN=Nop53 PE=1 SV=1	Q8BK35		Gltscr2	8014	2185	2562	0	0	1252	6146	3661	1056		5	5	21.1
	sp|P26443|DHE3_MOUSE Glutamate dehydrogenase 1, mitochondrial OS=Mus musculus OX=10090 GN=Glud1 PE=1 SV=1	P26443	Glutamate dehydrogenase 1, mitochondrial	Glud1	198157	169990	186100	206870	141340	169008	215500	156994	135312		26	26	48.2
	sp|Q922P9|GLYR1_MOUSE Putative oxidoreductase GLYR1 OS=Mus musculus OX=10090 GN=Glyr1 PE=1 SV=1	Q922P9	Putative oxidoreductase GLYR1	Glyr1	14501	18538	18973	16162	18713	20570	15217	19906	21805		11	11	28
	tr|E9Q368|E9Q368_MOUSE TAR RNA-binding protein 1 OS=Mus musculus OX=10090 GN=Tarbp1 PE=1 SV=1	E9Q368		Gm17296	1320	0	624	769	1086	567	1295	610	227		8	8	6.8
	sp|Q60648|SAP3_MOUSE Ganglioside GM2 activator OS=Mus musculus OX=10090 GN=Gm2a PE=1 SV=2	Q60648	Ganglioside GM2 activator	Gm2a	87513	97869	88473	35819	29194	102775	89946	106026	31181		4	4	25.9
	sp|Q8K0C9|GMDS_MOUSE GDP-mannose 4,6 dehydratase OS=Mus musculus OX=10090 GN=Gmds PE=1 SV=1	Q8K0C9	GDP-mannose 4,6 dehydratase	Gmds	36178	59394	73271	39764	50295	36368	53789	26964	49139		12	12	40.1
	sp|Q9JL60|GMEB1_MOUSE Glucocorticoid modulatory element-binding protein 1 OS=Mus musculus OX=10090 GN=Gmeb1 PE=1 SV=2	Q9JL60	Glucocorticoid modulatory element-binding protein 1	Gmeb1	410	1562	568	0	0	0	678	1577	1658		2	1	3.2
	sp|Q9ERL7|GMFG_MOUSE Glia maturation factor gamma OS=Mus musculus OX=10090 GN=Gmfg PE=1 SV=1	Q9ERL7	Glia maturation factor gamma	Gmfg	319990	278344	382812	320433	288326	329131	333142	221709	341992		14	11	85.2
	sp|Q6PGG2-2|GMIP_MOUSE Isoform 2 of GEM-interacting protein OS=Mus musculus OX=10090 GN=Gmip;sp|Q6PGG2|GMIP_MOUSE GEM-interacting protein OS=Mus musculus OX=10090 GN=Gmip PE=1 SV=1	Q6PGG2-2;Q6PGG2	GEM-interacting protein	Gmip	6032	8577	10937	5797	901	3265	6681	4191	4128		15	15	27.2
	sp|O88513|GEMI_MOUSE Geminin OS=Mus musculus OX=10090 GN=Gmnn PE=1 SV=1	O88513	Geminin	Gmnn	0	2534	2356	2277	2367	3015	3489	2717	3210		1	1	7.3
	sp|Q922H4|GMPPA_MOUSE Mannose-1-phosphate guanyltransferase alpha OS=Mus musculus OX=10090 GN=Gmppa PE=1 SV=1	Q922H4	Mannose-1-phosphate guanyltransferase alpha	Gmppa	20593	10237	19160	17078	12550	9122	17756	13269	9379		9	9	26.2
	sp|Q8BTZ7|GMPPB_MOUSE Mannose-1-phosphate guanyltransferase beta OS=Mus musculus OX=10090 GN=Gmppb PE=1 SV=1	Q8BTZ7	Mannose-1-phosphate guanyltransferase beta	Gmppb	36313	36982	66554	32177	14331	26714	34487	25293	28390		8	8	33.3
	sp|Q99L27|GMPR2_MOUSE GMP reductase 2 OS=Mus musculus OX=10090 GN=Gmpr2 PE=1 SV=2	Q99L27	GMP reductase 2	Gmpr2	14601	5444	3888	0	4009	12196	13215	6568	2817		5	5	17
	sp|Q3THK7|GUAA_MOUSE GMP synthase [glutamine-hydrolyzing] OS=Mus musculus OX=10090 GN=Gmps PE=1 SV=2	Q3THK7	GMP synthase [glutamine-hydrolyzing]	Gmps	115806	105969	165776	114963	86758	77459	129512	101564	116813		29	29	65.4
	sp|P27601|GNA13_MOUSE Guanine nucleotide-binding protein subunit alpha-13 OS=Mus musculus OX=10090 GN=Gna13 PE=1 SV=1	P27601;O70443;P21278;P27600	Guanine nucleotide-binding protein subunit alpha-13	Gna13	24672	14226	19208	9646	8099	10204	16716	15376	17708		9	8	26.3
	sp|P08752|GNAI2_MOUSE Guanine nucleotide-binding protein G(i) subunit alpha-2 OS=Mus musculus OX=10090 GN=Gnai2 PE=1 SV=5	P08752;B2RSH2;P18872-2;P20612;Q3V3I2;P50149;P18872	Guanine nucleotide-binding protein G(i) subunit alpha-2	Gnai2	449570	419389	488565	441148	330398	345179	465741	377336	342126		21	15	57.2
	sp|Q9DC51|GNAI3_MOUSE Guanine nucleotide-binding protein G(i) subunit alpha OS=Mus musculus OX=10090 GN=Gnai3 PE=1 SV=3	Q9DC51	Guanine nucleotide-binding protein G(k) subunit alpha	Gnai3	18455	21096	40767	47552	9465	23123	30250	29591	13668		7	7	46.6
	sp|P63094-2|GNAS2_MOUSE Isoform Gnas-2 of Guanine nucleotide-binding protein G(s) subunit alpha isoforms short OS=Mus musculus OX=10090 GN=Gnas;sp|P63094|GNAS2_MOUSE Guanine nucleotide-binding protein G(s) subunit alpha isoforms short OS=Mus musculus OX=10	P63094-2;P63094;Q6R0H7-4;Q6R0H7;P63094-3;Q8CGK7	Guanine nucleotide-binding protein G(s) subunit alpha isoforms short;Guanine nucleotide-binding protein G(s) subunit alpha isoforms XLas	Gnas	38754	43405	46405	27638	19498	20509	28273	24983	29726		12	12	37.4
	sp|P62874|GBB1_MOUSE Guanine nucleotide-binding protein G(I)/G(S)/G(T) subunit beta-1 OS=Mus musculus OX=10090 GN=Gnb1 PE=1 SV=3	P62874;Q61011	Guanine nucleotide-binding protein G(I)/G(S)/G(T) subunit beta-1	Gnb1	116263	90113	151361	125784	91526	89299	126333	99229	108727		9	8	70.3
	sp|P62880|GBB2_MOUSE Guanine nucleotide-binding protein G(I)/G(S)/G(T) subunit beta-2 OS=Mus musculus OX=10090 GN=Gnb2 PE=1 SV=3	P62880	Guanine nucleotide-binding protein G(I)/G(S)/G(T) subunit beta-2	Gnb2	469727	342846	413352	377575	289310	336454	440751	343099	306330		17	8	65
	sp|P68040|RACK1_MOUSE Receptor of activated protein C kinase 1 OS=Mus musculus OX=10090 GN=Rack1 PE=1 SV=3	P68040	Guanine nucleotide-binding protein subunit beta-2-like 1;Guanine nucleotide-binding protein subunit beta-2-like 1, N-terminally processed	Gnb2l1	1476510	1289870	1331250	1117150	775755	929808	1451130	1133930	984803		27	27	87.4
	sp|Q91WG8|GLCNE_MOUSE Bifunctional UDP-N-acetylglucosamine 2-epimerase/N-acetylmannosamine kinase OS=Mus musculus OX=10090 GN=Gne PE=1 SV=1	Q91WG8	Bifunctional UDP-N-acetylglucosamine 2-epimerase/N-acetylmannosamine kinase;UDP-N-acetylglucosamine 2-epimerase (hydrolyzing);N-acetylmannosamine kinase	Gne	23098	16902	19693	23232	15520	0	2848	7338	764		9	9	16.8
	sp|P36916|GNL1_MOUSE Guanine nucleotide-binding protein-like 1 OS=Mus musculus OX=10090 GN=Gnl1 PE=1 SV=4;sp|P36916-2|GNL1_MOUSE Isoform 2 of Guanine nucleotide-binding protein-like 1 OS=Mus musculus OX=10090 GN=Gnl1	P36916;P36916-2	Guanine nucleotide-binding protein-like 1	Gnl1	2440	4704	1579	4878	4614	2007	5366	1760	1452		6	6	11
	sp|Q99LH1|NOG2_MOUSE Nucleolar GTP-binding protein 2 OS=Mus musculus OX=10090 GN=Gnl2 PE=1 SV=2	Q99LH1	Nucleolar GTP-binding protein 2	Gnl2	8314	8542	15310	2784	8026	13954	12953	12270	7235		13	13	26
	sp|Q8CI11|GNL3_MOUSE Guanine nucleotide-binding protein-like 3 OS=Mus musculus OX=10090 GN=Gnl3 PE=1 SV=2;sp|Q8CI11-2|GNL3_MOUSE Isoform 2 of Guanine nucleotide-binding protein-like 3 OS=Mus musculus OX=10090 GN=Gnl3	Q8CI11;Q8CI11-2	Guanine nucleotide-binding protein-like 3	Gnl3	43835	37074	45558	27104	27690	25258	27544	32181	29745		16	16	34.4
	sp|Q6PGG6|GNL3L_MOUSE Guanine nucleotide-binding protein-like 3-like protein OS=Mus musculus OX=10090 GN=Gnl3l PE=1 SV=1	Q6PGG6	Guanine nucleotide-binding protein-like 3-like protein	Gnl3l	1806	1290	3998	783	0	1222	1370	3370	1532		3	3	8
	sp|O88958|GNPI1_MOUSE Glucosamine-6-phosphate isomerase 1 OS=Mus musculus OX=10090 GN=Gnpda1 PE=1 SV=3	O88958;Q9CRC9-2;Q9CRC9	Glucosamine-6-phosphate isomerase 1	Gnpda1	42670	5395	21523	40954	16192	37863	39542	17685	11429		9	9	46.4
	sp|Q9JK38|GNA1_MOUSE Glucosamine 6-phosphate N-acetyltransferase OS=Mus musculus OX=10090 GN=Gnpnat1 PE=1 SV=1	Q9JK38	Glucosamine 6-phosphate N-acetyltransferase	Gnpnat1	32563	34804	43706	35430	29386	27339	24919	29219	22096		6	6	52.2
	sp|Q69ZN6-2|GNPTA_MOUSE Isoform 2 of N-acetylglucosamine-1-phosphotransferase subunits alpha/beta OS=Mus musculus OX=10090 GN=Gnptab;sp|Q69ZN6|GNPTA_MOUSE N-acetylglucosamine-1-phosphotransferase subunits alpha/beta OS=Mus musculus OX=10090 GN=Gnptab PE=2	Q69ZN6-2;Q69ZN6	N-acetylglucosamine-1-phosphotransferase subunits alpha/beta;N-acetylglucosamine-1-phosphotransferase subunit alpha;N-acetylglucosamine-1-phosphotransferase subunit beta	Gnptab	0	196	0	763	463	675	904	178	871		3	3	3.4
	sp|Q8BFR4|GNS_MOUSE N-acetylglucosamine-6-sulfatase OS=Mus musculus OX=10090 GN=Gns PE=1 SV=1	Q8BFR4	N-acetylglucosamine-6-sulfatase	Gns	3354	0	0	2937	1482	2039	1343	1760	2224		5	5	12.7
	sp|P55937-1|GOGA3_MOUSE Isoform 1 of Golgin subfamily A member 3 OS=Mus musculus OX=10090 GN=Golga3;sp|P55937|GOGA3_MOUSE Golgin subfamily A member 3 OS=Mus musculus OX=10090 GN=Golga3 PE=1 SV=3	P55937-1;P55937	Golgin subfamily A member 3	Golga3	1476	948	961	1109	531	312	9307	1112	960		8	8	9.1
	sp|Q91W53|GOGA7_MOUSE Golgin subfamily A member 7 OS=Mus musculus OX=10090 GN=Golga7 PE=1 SV=1;sp|Q91W53-2|GOGA7_MOUSE Isoform 2 of Golgin subfamily A member 7 OS=Mus musculus OX=10090 GN=Golga7	Q91W53;Q91W53-2	Golgin subfamily A member 7	Golga7	6461	0	0	26725	4054	5512	4379	4004	3254		3	3	24.8
	sp|Q91XA2|GOLM1_MOUSE Golgi membrane protein 1 OS=Mus musculus OX=10090 GN=Golm1 PE=1 SV=2	Q91XA2	Golgi membrane protein 1	Golm1	3783	1628	3119	1645	3505	5810	3875	0	1890		7	7	22.6
	sp|Q9CR60|GOT1B_MOUSE Vesicle transport protein GOT1B OS=Mus musculus OX=10090 GN=Golt1b PE=1 SV=1	Q9CR60	Vesicle transport protein GOT1B	Golt1b	10379	8395	10885	7923	4847	6653	9843	8158	16400		1	1	10.9
	sp|Q8BH60-2|GOPC_MOUSE Isoform 2 of Golgi-associated PDZ and coiled-coil motif-containing protein OS=Mus musculus OX=10090 GN=Gopc;sp|Q8BH60|GOPC_MOUSE Golgi-associated PDZ and coiled-coil motif-containing protein OS=Mus musculus OX=10090 GN=Gopc PE=1 SV=1	Q8BH60-2;Q8BH60	Golgi-associated PDZ and coiled-coil motif-containing protein	Gopc	0	3059	7069	4171	1785	0	0	2502	3432		3	3	10.3
	sp|Q99JX3-2|GORS2_MOUSE Isoform 2 of Golgi reassembly-stacking protein 2 OS=Mus musculus OX=10090 GN=Gorasp2;sp|Q99JX3|GORS2_MOUSE Golgi reassembly-stacking protein 2 OS=Mus musculus OX=10090 GN=Gorasp2 PE=1 SV=3	Q99JX3-2;Q99JX3	Golgi reassembly-stacking protein 2	Gorasp2	13350	12016	4900	8807	10327	18800	13513	15125	10688		5	5	22.5
	sp|O88630|GOSR1_MOUSE Golgi SNAP receptor complex member 1 OS=Mus musculus OX=10090 GN=Gosr1 PE=1 SV=2	O88630	Golgi SNAP receptor complex member 1	Gosr1	15142	4336	17296	18541	6828	16623	14753	16067	11447		4	4	24.4
	sp|P05201|AATC_MOUSE Aspartate aminotransferase, cytoplasmic OS=Mus musculus OX=10090 GN=Got1 PE=1 SV=3	P05201	Aspartate aminotransferase, cytoplasmic	Got1	186414	118413	140570	134832	105044	120239	146371	90982	101313		18	18	60.3
	sp|P05202|AATM_MOUSE Aspartate aminotransferase, mitochondrial OS=Mus musculus OX=10090 GN=Got2 PE=1 SV=1	P05202	Aspartate aminotransferase, mitochondrial	Got2	1044780	876958	1243370	1030270	726386	813792	772931	648441	870218		25	25	66
	sp|Q9WTK3|GPAA1_MOUSE Glycosylphosphatidylinositol anchor attachment 1 protein OS=Mus musculus OX=10090 GN=Gpaa1 PE=1 SV=3	Q9WTK3	Glycosylphosphatidylinositol anchor attachment 1 protein	Gpaa1	3847	0	1858	3508	2460	3885	1610	0	0		3	3	4.7
	sp|Q3ULJ0-2|GPD1L_MOUSE Isoform 2 of Glycerol-3-phosphate dehydrogenase 1-like protein OS=Mus musculus OX=10090 GN=Gpd1l;sp|Q3ULJ0|GPD1L_MOUSE Glycerol-3-phosphate dehydrogenase 1-like protein OS=Mus musculus OX=10090 GN=Gpd1l PE=1 SV=2	Q3ULJ0-2;Q3ULJ0;P13707	Glycerol-3-phosphate dehydrogenase 1-like protein	Gpd1l	7397	6885	25890	15988	23630	18401	8366	8962	21678		6	6	22.8
	sp|Q64521|GPDM_MOUSE Glycerol-3-phosphate dehydrogenase, mitochondrial OS=Mus musculus OX=10090 GN=Gpd2 PE=1 SV=2	Q64521	Glycerol-3-phosphate dehydrogenase, mitochondrial	Gpd2	42424	45656	48100	45581	28086	12555	30300	19320	21511		24	24	47.6
	sp|P06745|G6PI_MOUSE Glucose-6-phosphate isomerase OS=Mus musculus OX=10090 GN=Gpi PE=1 SV=4	P06745;CON__Q3ZBD7	Glucose-6-phosphate isomerase	Gpi	414311	352475	469558	306986	287187	311018	405363	283257	325300		27	27	52.7
	sp|Q8VCE2|GPN1_MOUSE GPN-loop GTPase 1 OS=Mus musculus OX=10090 GN=Gpn1 PE=1 SV=1	Q8VCE2	GPN-loop GTPase 1	Gpn1	3133	0	0	3265	3784	0	0	1529	2798		4	4	14.5
	sp|Q91WD0-2|GP108_MOUSE Isoform 2 of Protein GPR108 OS=Mus musculus OX=10090 GN=Gpr108;sp|Q91WD0|GP108_MOUSE Protein GPR108 OS=Mus musculus OX=10090 GN=Gpr108 PE=1 SV=1	Q91WD0-2;Q91WD0	Protein GPR108	Gpr108	0	0	0	1230	1280	1871	1507	1456	1040		1	1	4.8
	sp|Q99LD4|CSN1_MOUSE COP9 signalosome complex subunit 1 OS=Mus musculus OX=10090 GN=Gps1 PE=1 SV=1;sp|Q99LD4-2|CSN1_MOUSE Isoform 2 of COP9 signalosome complex subunit 1 OS=Mus musculus OX=10090 GN=Gps1	Q99LD4;Q99LD4-2	COP9 signalosome complex subunit 1	Gps1	31862	28971	25721	19130	29193	15704	28222	26223	27392		15	15	41.8
	sp|P11352|GPX1_MOUSE Glutathione peroxidase 1 OS=Mus musculus OX=10090 GN=Gpx1 PE=1 SV=2	P11352	Glutathione peroxidase 1	Gpx1	30002	30849	69178	48153	46574	79378	61010	45917	39883		6	6	47.3
	sp|O70325-2|GPX4_MOUSE Isoform Cytoplasmic of Phospholipid hydroperoxide glutathione peroxidase OS=Mus musculus OX=10090 GN=Gpx4;sp|O70325|GPX4_MOUSE Phospholipid hydroperoxide glutathione peroxidase OS=Mus musculus OX=10090 GN=Gpx4 PE=1 SV=4;sp|O70325-3|G	O70325-2;O70325;O70325-3	Phospholipid hydroperoxide glutathione peroxidase, mitochondrial	Gpx4	30316	51895	57730	78924	16735	51873	35271	28412	23426		6	6	35.3
	sp|Q9CX99|GRAP_MOUSE GRB2-related adapter protein OS=Mus musculus OX=10090 GN=Grap PE=1 SV=1	Q9CX99	GRB2-related adapter protein	Grap	3907	0	0	0	2354	2247	3130	0	2962		2	2	11.1
	sp|O89100|GRAP2_MOUSE GRB2-related adaptor protein 2 OS=Mus musculus OX=10090 GN=Grap2 PE=1 SV=1	O89100	GRB2-related adaptor protein 2	Grap2	262547	253488	296236	205601	229926	196373	223014	203485	164122		18	18	75.8
	sp|Q60631|GRB2_MOUSE Growth factor receptor-bound protein 2 OS=Mus musculus OX=10090 GN=Grb2 PE=1 SV=1;sp|Q60631-2|GRB2_MOUSE Isoform 2 of Growth factor receptor-bound protein 2 OS=Mus musculus OX=10090 GN=Grb2	Q60631;Q60631-2	Growth factor receptor-bound protein 2	Grb2	235934	210756	279770	182857	207069	257565	167914	106363	150120		14	14	74.7
	sp|Q91Z53|GRHPR_MOUSE Glyoxylate reductase/hydroxypyruvate reductase OS=Mus musculus OX=10090 GN=Grhpr PE=1 SV=1	Q91Z53	Glyoxylate reductase/hydroxypyruvate reductase	Grhpr	68711	66080	71423	56636	42543	54313	31367	75802	59523		9	9	50
	sp|O70293-2|GRK6_MOUSE Isoform GRK6B of G protein-coupled receptor kinase 6 OS=Mus musculus OX=10090 GN=Grk6;sp|O70293|GRK6_MOUSE G protein-coupled receptor kinase 6 OS=Mus musculus OX=10090 GN=Grk6 PE=1 SV=1	O70293-2;O70293;O70291	G protein-coupled receptor kinase 6	Grk6	0	1605	0	3303	8508	2431	14181	7395	6564		8	8	19
	sp|Q99LP6|GRPE1_MOUSE GrpE protein homolog 1, mitochondrial OS=Mus musculus OX=10090 GN=Grpel1 PE=1 SV=1	Q99LP6	GrpE protein homolog 1, mitochondrial	Grpel1	148702	219223	214860	104753	74117	114678	115841	147907	168262		10	10	54.4
	sp|Q810D6|GRWD1_MOUSE Glutamate-rich WD repeat-containing protein 1 OS=Mus musculus OX=10090 GN=Grwd1 PE=1 SV=2	Q810D6	Glutamate-rich WD repeat-containing protein 1	Grwd1	35243	29379	24638	25172	9998	11911	31977	13637	26288		8	8	30
	sp|Q9D8T2|GSDMD_MOUSE Gasdermin-D OS=Mus musculus OX=10090 GN=Gsdmdc1 PE=1 SV=1	Q9D8T2;A0A2R8VKQ7	Gasdermin-D	Gsdmdc1	1557	0	7155	6233	1954	2017	1607	0	3701		5	5	20.7
	sp|Q2NL51|GSK3A_MOUSE Glycogen synthase kinase-3 alpha OS=Mus musculus OX=10090 GN=Gsk3a PE=1 SV=2	Q2NL51	Glycogen synthase kinase-3 alpha	Gsk3a	9620	2526	15236	8420	6201	3369	8534	5760	9192		6	5	17.1
	sp|Q9WV60|GSK3B_MOUSE Glycogen synthase kinase-3 beta OS=Mus musculus OX=10090 GN=Gsk3b PE=1 SV=2	Q9WV60	Glycogen synthase kinase-3 beta	Gsk3b	5914	6766	8993	9321	4260	3834	5569	5418	5459		4	4	17.1
	sp|P13020-2|GELS_MOUSE Isoform 2 of Gelsolin OS=Mus musculus OX=10090 GN=Gsn;sp|P13020|GELS_MOUSE Gelsolin OS=Mus musculus OX=10090 GN=Gsn PE=1 SV=3	P13020-2;P13020	Gelsolin	Gsn	12340	8551	14748	9846	4527	5832	6728	4492	5813		11	7	20.7
	sp|Q8R050-2|ERF3A_MOUSE Isoform 2 of Eukaryotic peptide chain release factor GTP-binding subunit ERF3A OS=Mus musculus OX=10090 GN=Gspt1;sp|Q8R050|ERF3A_MOUSE Eukaryotic peptide chain release factor GTP-binding subunit ERF3A OS=Mus musculus OX=10090 GN=Gsp	Q8R050-2;Q8R050	Eukaryotic peptide chain release factor GTP-binding subunit ERF3A	Gspt1	126086	120628	193287	120029	112457	125939	148887	144231	161087		27	14	55.7
	sp|P47791-2|GSHR_MOUSE Isoform Cytoplasmic of Glutathione reductase, mitochondrial OS=Mus musculus OX=10090 GN=Gsr;sp|P47791|GSHR_MOUSE Glutathione reductase, mitochondrial OS=Mus musculus OX=10090 GN=Gsr PE=1 SV=3	P47791-2;P47791	Glutathione reductase, mitochondrial	Gsr	40778	49416	66675	59783	53057	46834	62560	54023	75470		16	16	52.5
	sp|P51855|GSHB_MOUSE Glutathione synthetase OS=Mus musculus OX=10090 GN=Gss PE=1 SV=1	P51855	Glutathione synthetase	Gss	3483	2506	0	0	0	0	0	3886	3979		2	2	6.1
	sp|O09131|GSTO1_MOUSE Glutathione S-transferase omega-1 OS=Mus musculus OX=10090 GN=Gsto1 PE=1 SV=2	O09131;Q8K2Q2	Glutathione S-transferase omega-1	Gsto1	57647	34235	103497	71732	67215	85513	1696390	102151	50781		12	12	57.1
	sp|P19157|GSTP1_MOUSE Glutathione S-transferase P 1 OS=Mus musculus OX=10090 GN=Gstp1 PE=1 SV=2;sp|P46425|GSTP2_MOUSE Glutathione S-transferase P 2 OS=Mus musculus OX=10090 GN=Gstp2 PE=1 SV=2	P19157;P46425	Glutathione S-transferase P 1;Glutathione S-transferase P 2	Gstp1;Gstp2	142598	122208	68552	109768	106081	380954	175631	156325	132059		15	15	67.6
	sp|Q61133|GSTT2_MOUSE Glutathione S-transferase theta-2 OS=Mus musculus OX=10090 GN=Gstt2 PE=1 SV=4	Q61133	Glutathione S-transferase theta-2	Gstt2	29207	20127	17020	29149	17136	43024	36511	39590	12973		6	6	35.7
	sp|P62915|TF2B_MOUSE Transcription initiation factor IIB OS=Mus musculus OX=10090 GN=Gtf2b PE=1 SV=1	P62915	Transcription initiation factor IIB	Gtf2b	10418	9184	16454	7696	10070	5520	9430	6222	10664		6	6	29.4
	sp|Q9D0D5|T2EA_MOUSE General transcription factor IIE subunit 1 OS=Mus musculus OX=10090 GN=Gtf2e1 PE=1 SV=1	Q9D0D5	General transcription factor IIE subunit 1	Gtf2e1	4924	1184	12281	1512	8439	2089	2114	5692	1964		5	5	19.8
	sp|Q9D902|T2EB_MOUSE General transcription factor IIE subunit 2 OS=Mus musculus OX=10090 GN=Gtf2e2 PE=1 SV=2	Q9D902	General transcription factor IIE subunit 2	Gtf2e2	9942	5457	8933	3373	3644	2934	3212	2892	2899		3	3	15.4
	sp|Q3THK3|T2FA_MOUSE General transcription factor IIF subunit 1 OS=Mus musculus OX=10090 GN=Gtf2f1 PE=1 SV=2	Q3THK3	General transcription factor IIF subunit 1	Gtf2f1	11117	13652	19631	13808	18390	13946	19321	20147	20514		9	9	24.8
	sp|Q8R0A0|T2FB_MOUSE General transcription factor IIF subunit 2 OS=Mus musculus OX=10090 GN=Gtf2f2 PE=1 SV=1	Q8R0A0	General transcription factor IIF subunit 2	Gtf2f2	86854	86055	89488	50383	57971	76032	101763	58930	77918		12	12	56.6
	sp|Q9DBA9|TF2H1_MOUSE General transcription factor IIH subunit 1 OS=Mus musculus OX=10090 GN=Gtf2h1 PE=1 SV=2	Q9DBA9	General transcription factor IIH subunit 1	Gtf2h1	1308	0	746	1010	679	970	1240	1315	888		4	4	9.5
	sp|Q9ESZ8-5|GTF2I_MOUSE Isoform 5 of General transcription factor II-I OS=Mus musculus OX=10090 GN=Gtf2i;sp|Q9ESZ8-4|GTF2I_MOUSE Isoform 4 of General transcription factor II-I OS=Mus musculus OX=10090 GN=Gtf2i;sp|Q9ESZ8-3|GTF2I_MOUSE Isoform 3 of General t	Q9ESZ8-5;Q9ESZ8-4;Q9ESZ8-3;Q9ESZ8-6;Q9ESZ8-2;Q9ESZ8	General transcription factor II-I	Gtf2i	24856	11467	18765	19941	17038	18382	18938	19347	14001		23	23	29.1
	sp|Q8K284|TF3C1_MOUSE General transcription factor 3C polypeptide 1 OS=Mus musculus OX=10090 GN=Gtf3c1 PE=1 SV=2;sp|Q8K284-2|TF3C1_MOUSE Isoform 2 of General transcription factor 3C polypeptide 1 OS=Mus musculus OX=10090 GN=Gtf3c1	Q8K284;Q8K284-2;Q8K284-3	General transcription factor 3C polypeptide 1	Gtf3c1	431	535	2230	0	1138	0	860	545	0		7	7	4
	sp|Q8BL74|TF3C2_MOUSE General transcription factor 3C polypeptide 2 OS=Mus musculus OX=10090 GN=Gtf3c2 PE=2 SV=2	Q8BL74	General transcription factor 3C polypeptide 2	Gtf3c2	1463	0	1387	653	0	0	338	0	847		3	3	4.9
	tr|Q3TMP1|Q3TMP1_MOUSE General transcription factor IIIC, polypeptide 3 OS=Mus musculus OX=10090 GN=Gtf3c3 PE=1 SV=1	Q3TMP1		Gtf3c3	1344	1370	2206	2568	2091	2588	2789	2380	2381		5	5	7.3
	sp|Q8BMQ2|TF3C4_MOUSE General transcription factor 3C polypeptide 4 OS=Mus musculus OX=10090 GN=Gtf3c4 PE=1 SV=2;sp|Q8BMQ2-2|TF3C4_MOUSE Isoform 2 of General transcription factor 3C polypeptide 4 OS=Mus musculus OX=10090 GN=Gtf3c4	Q8BMQ2;Q8BMQ2-2;Q8BMQ2-3	General transcription factor 3C polypeptide 4	Gtf3c4	1639	0	4681	901	869	535	1465	0	1010		5	5	11.4
	sp|Q8R2T8-2|TF3C5_MOUSE Isoform 2 of General transcription factor 3C polypeptide 5 OS=Mus musculus OX=10090 GN=Gtf3c5;sp|Q8R2T8|TF3C5_MOUSE General transcription factor 3C polypeptide 5 OS=Mus musculus OX=10090 GN=Gtf3c5 PE=2 SV=2	Q8R2T8-2;Q8R2T8	General transcription factor 3C polypeptide 5	Gtf3c5	2857	2049	0	2008	5379	3973	4517	3893	3223		6	6	13.8
	sp|O08582|GTPB1_MOUSE GTP-binding protein 1 OS=Mus musculus OX=10090 GN=Gtpbp1 PE=1 SV=2	O08582	GTP-binding protein 1	Gtpbp1	29891	26088	29588	40962	31676	28098	39068	16658	31785		15	15	34.7
	sp|Q99ME9|NOG1_MOUSE Nucleolar GTP-binding protein 1 OS=Mus musculus OX=10090 GN=Gtpbp4 PE=1 SV=3	Q99ME9	Nucleolar GTP-binding protein 1	Gtpbp4	94537	85976	99365	58037	39041	54904	108518	78506	73816		25	25	46.1
	sp|Q8R080|GTSE1_MOUSE G2 and S phase-expressed protein 1 OS=Mus musculus OX=10090 GN=Gtse1 PE=1 SV=2	Q8R080	G2 and S phase-expressed protein 1	Gtse1	1268	0	0	2163	2472	945	1223	779	768		2	2	4.5
	sp|Q64520|KGUA_MOUSE Guanylate kinase OS=Mus musculus OX=10090 GN=Guk1 PE=1 SV=2	Q64520	Guanylate kinase	Guk1	14440	3097	13243	18302	22581	17554	7106	10218	11183		5	5	31.8
	sp|P12265|BGLR_MOUSE Beta-glucuronidase OS=Mus musculus OX=10090 GN=Gusb PE=1 SV=2	P12265	Beta-glucuronidase	Gusb	26683	18628	22728	17187	20532	18355	23631	11860	14315		14	14	32.3
	sp|Q80SU7|GVIN1_MOUSE Interferon-induced very large GTPase 1 OS=Mus musculus OX=10090 GN=Gvin1 PE=1 SV=1	Q80SU7	Interferon-induced very large GTPase 1	Gvin1	151859	154478	206905	129369	93304	99311	179133	132403	153471		105	105	50.7
	sp|Q9R062|GLYG_MOUSE Glycogenin-1 OS=Mus musculus OX=10090 GN=Gyg1 PE=1 SV=3	Q9R062	Glycogenin-1	Gyg1	10164	6480	28316	25490	28291	21398	13220	7253	21975		6	6	25.2
	sp|Q9Z1E4|GYS1_MOUSE Glycogen [starch] synthase, muscle OS=Mus musculus OX=10090 GN=Gys1 PE=1 SV=2	Q9Z1E4	Glycogen [starch] synthase, muscle	Gys1	3280	2706	1828	1409	1122	827	2512	1374	1942		3	3	6.2
	sp|P11032-2|GRAA_MOUSE Isoform HF2 of Granzyme A OS=Mus musculus OX=10090 GN=Gzma;sp|P11032|GRAA_MOUSE Granzyme A OS=Mus musculus OX=10090 GN=Gzma PE=1 SV=2	P11032-2;P11032	Granzyme A	Gzma	3417470	3914020	4063310	2549840	2955660	3403670	3544460	4108190	3566700		22	22	66.9
	sp|P04187|GRAB_MOUSE Granzyme B(G,H) OS=Mus musculus OX=10090 GN=Gzmb PE=1 SV=1	P04187;P26262	Granzyme B(G,H)	Gzmb	12675500	13279100	14706700	8536510	8948180	9208410	10203300	9555320	10245000		31	28	70.9
	sp|P08882|GRAC_MOUSE Granzyme C OS=Mus musculus OX=10090 GN=Gzmc PE=1 SV=1	P08882;P13366;P08883;P11033	Granzyme C	Gzmc	41715	46872	71952	26666	24500	42198	21054	39186	51801		8	7	48
	sp|P10922|H10_MOUSE Histone H1.0 OS=Mus musculus OX=10090 GN=H1f0 PE=2 SV=4	P10922	Histone H1.0;Histone H1.0, N-terminally processed	H1f0	40654	48987	15546	30482	0	30694	88101	120912	145077		4	4	21.1
	sp|P01899|HA11_MOUSE H-2 class I histocompatibility antigen, D-B alpha chain OS=Mus musculus OX=10090 GN=H2-D1 PE=1 SV=2;sp|P01897|HA1L_MOUSE H-2 class I histocompatibility antigen, L-D alpha chain OS=Mus musculus OX=10090 GN=H2-L PE=1 SV=2	P01899;P01897;P01896;P14427	H-2 class I histocompatibility antigen, D-B alpha chain;H-2 class I histocompatibility antigen, L-D alpha chain	H2-D1;H2-L	1072120	1014710	1239650	1054290	767065	856374	953009	1039340	750452		20	11	48.6
	sp|P01901|HA1B_MOUSE H-2 class I histocompatibility antigen, K-B alpha chain OS=Mus musculus OX=10090 GN=H2-K1 PE=1 SV=1	P01901;P04223;P04223-2;P14428;P03991	H-2 class I histocompatibility antigen, K-B alpha chain	H2-K1	485403	544936	620972	463634	397881	344941	451584	396453	347176		17	8	60.2
	sp|P14429|HA17_MOUSE H-2 class I histocompatibility antigen, Q7 alpha chain OS=Mus musculus OX=10090 GN=H2-Q7 PE=1 SV=1;sp|P14431|HA19_MOUSE H-2 class I histocompatibility antigen, Q9 alpha chain (Fragment) OS=Mus musculus OX=10090 GN=H2-Q9 PE=3 SV=1	P14429;P14431	H-2 class I histocompatibility antigen, Q7 alpha chain;H-2 class I histocompatibility antigen, Q9 alpha chain	H2-Q7;H2-Q9	19532	79116	77448	61135	77698	53941	10093	47303	49381		7	5	39.2
	sp|P06339|HA15_MOUSE H-2 class I histocompatibility antigen, D-37 alpha chain OS=Mus musculus OX=10090 GN=H2-T23 PE=1 SV=1	P06339	H-2 class I histocompatibility antigen, D-37 alpha chain	H2-T23	8624	0	7297	12256	8377	9576	14313	12244	9730		3	3	19.3
	sp|Q3THW5|H2AV_MOUSE Histone H2A.V OS=Mus musculus OX=10090 GN=H2afv PE=1 SV=3;sp|P0C0S6|H2AZ_MOUSE Histone H2A.Z OS=Mus musculus OX=10090 GN=H2afz PE=1 SV=2	Q3THW5;P0C0S6	Histone H2A.V;Histone H2A.Z	H2afv;H2afz	2258460	1491100	2422750	2328180	2016990	2328450	2717740	2075810	2210650		3	3	31.2
	sp|P27661|H2AX_MOUSE Histone H2AX OS=Mus musculus OX=10090 GN=H2afx PE=1 SV=2	P27661	Histone H2AX	H2afx	1457570	1198180	816610	169846	606480	1012800	757201	664549	1601090		3	1	45.5
	sp|Q9QZQ8|H2AY_MOUSE Core histone macro-H2A.1 OS=Mus musculus OX=10090 GN=H2afy PE=1 SV=3;sp|Q9QZQ8-2|H2AY_MOUSE Isoform 1 of Core histone macro-H2A.1 OS=Mus musculus OX=10090 GN=H2afy	Q9QZQ8;Q9QZQ8-2;Q8CCK0	Core histone macro-H2A.1	H2afy	1071910	912444	1062850	1085550	857895	1087150	1046980	910669	1034470		21	21	53.8
	sp|P84244|H33_MOUSE Histone H3.3 OS=Mus musculus OX=10090 GN=H3f3a PE=1 SV=2;sp|P02301|H3C_MOUSE Histone H3.3C OS=Mus musculus OX=10090 GN=H3f3c PE=3 SV=3	P84244;P02301	Histone H3.3;Histone H3.3C	H3f3a;H3f3c	66569	35391	12512	64767	3312	32463	119301	41693	62933		2	2	67.6
	sp|Q8K2C9|HACD3_MOUSE Very-long-chain (3R)-3-hydroxyacyl-CoA dehydratase 3 OS=Mus musculus OX=10090 GN=Hacd3 PE=1 SV=2	Q8K2C9	Very-long-chain (3R)-3-hydroxyacyl-CoA dehydratase 3	Hacd3	26887	21315	15506	16109	14023	20578	16305	20151	18484		6	6	23.8
	sp|Q61425|HCDH_MOUSE Hydroxyacyl-coenzyme A dehydrogenase, mitochondrial OS=Mus musculus OX=10090 GN=Hadh PE=1 SV=2	Q61425	Hydroxyacyl-coenzyme A dehydrogenase, mitochondrial	Hadh	32990	16608	20352	26067	26822	21107	31270	26455	19523		8	8	46.5
	sp|Q8BMS1|ECHA_MOUSE Trifunctional enzyme subunit alpha, mitochondrial OS=Mus musculus OX=10090 GN=Hadha PE=1 SV=1	Q8BMS1	Trifunctional enzyme subunit alpha, mitochondrial;Long-chain enoyl-CoA hydratase;Long chain 3-hydroxyacyl-CoA dehydrogenase	Hadha	66445	83852	92572	89406	67939	83233	102542	75303	79313		29	29	49.5
	sp|Q99JY0|ECHB_MOUSE Trifunctional enzyme subunit beta, mitochondrial OS=Mus musculus OX=10090 GN=Hadhb PE=1 SV=1	Q99JY0	Trifunctional enzyme subunit beta, mitochondrial;3-ketoacyl-CoA thiolase	Hadhb	137731	145319	151580	193439	138523	157804	176729	108753	115923		17	17	48.4
	sp|Q9NYQ2|HAOX2_MOUSE Hydroxyacid oxidase 2 OS=Mus musculus OX=10090 GN=Hao2 PE=1 SV=1	Q9NYQ2	Hydroxyacid oxidase 2	Hao2	0	4236	9036	4677	14463	6622	4658	9464	0		2	2	4
	sp|Q61035|SYHC_MOUSE Histidine--tRNA ligase, cytoplasmic OS=Mus musculus OX=10090 GN=Hars PE=1 SV=2	Q61035	Histidine--tRNA ligase, cytoplasmic	Hars	126793	125507	174189	155110	94694	117205	141333	119270	89430		20	16	39.9
	sp|Q8BY71|HAT1_MOUSE Histone acetyltransferase type B catalytic subunit OS=Mus musculus OX=10090 GN=Hat1 PE=1 SV=1	Q8BY71	Histone acetyltransferase type B catalytic subunit	Hat1	62419	52696	94460	53257	22032	30808	95307	65398	69151		11	11	43
	sp|Q8BHX1|HAUS1_MOUSE HAUS augmin-like complex subunit 1 OS=Mus musculus OX=10090 GN=Haus1 PE=1 SV=2	Q8BHX1	HAUS augmin-like complex subunit 1	Haus1	3260	7493	2357	3358	2580	6278	3082	6623	6950		4	4	20.1
	sp|Q9D786|HAUS5_MOUSE HAUS augmin-like complex subunit 5 OS=Mus musculus OX=10090 GN=Haus5 PE=1 SV=1;sp|Q9D786-2|HAUS5_MOUSE Isoform 2 of HAUS augmin-like complex subunit 5 OS=Mus musculus OX=10090 GN=Haus5	Q9D786;Q9D786-2	HAUS augmin-like complex subunit 5	Haus5	1308	1472	1821	1634	5486	2396	1600	1504	1587		5	5	9.7
	tr|Q6NV99|Q6NV99_MOUSE HAUS augmin-like complex, subunit 6 OS=Mus musculus OX=10090 GN=Haus6 PE=1 SV=1	Q6NV99		Haus6	0	549	2715	441	275	0	545	506	644		3	3	4.2
	sp|P01942|HBA_MOUSE Hemoglobin subunit alpha OS=Mus musculus OX=10090 GN=Hba PE=1 SV=2	P01942	Hemoglobin subunit alpha	Hba	21324	12691	29807	29118	11619	45692	43650	22537	15255		1	1	14.8
	sp|Q69ZS7|HBS1L_MOUSE HBS1-like protein OS=Mus musculus OX=10090 GN=Hbs1l PE=1 SV=2;sp|Q69ZS7-2|HBS1L_MOUSE Isoform 2 of HBS1-like protein OS=Mus musculus OX=10090 GN=Hbs1l	Q69ZS7;Q69ZS7-2;Q69ZS7-3	HBS1-like protein	Hbs1l	1364	3027	5266	2124	2040	2499	2323	1720	1589		9	9	24.3
	sp|P53702|CCHL_MOUSE Cytochrome c-type heme lyase OS=Mus musculus OX=10090 GN=Hccs PE=1 SV=2	P53702	Cytochrome c-type heme lyase	Hccs	23223	15274	16145	15324	9561	15996	20109	17833	17425		3	3	15.4
	sp|Q61191|HCFC1_MOUSE Host cell factor 1 OS=Mus musculus OX=10090 GN=Hcfc1 PE=1 SV=2	Q61191	Host cell factor 1;HCF N-terminal chain 1;HCF N-terminal chain 2;HCF N-terminal chain 3;HCF N-terminal chain 4;HCF N-terminal chain 5;HCF N-terminal chain 6;HCF C-terminal chain 1;HCF C-terminal chain 2;HCF C-terminal chain 3;HCF C-terminal chain 4;HCF C-terminal chain 5;HCF C-terminal chain 6	Hcfc1	30228	36471	43003	43907	40266	33798	35926	33579	32724		34	34	26
	sp|P49710|HCLS1_MOUSE Hematopoietic lineage cell-specific protein OS=Mus musculus OX=10090 GN=Hcls1 PE=1 SV=2	P49710	Hematopoietic lineage cell-specific protein	Hcls1	383764	305007	347245	284081	217883	261746	260003	177902	228732		21	21	49.8
	sp|O09106|HDAC1_MOUSE Histone deacetylase 1 OS=Mus musculus OX=10090 GN=Hdac1 PE=1 SV=1	O09106	Histone deacetylase 1	Hdac1	174556	147719	142741	123870	112487	164365	225923	183600	145420		21	13	50
	sp|P70288|HDAC2_MOUSE Histone deacetylase 2 OS=Mus musculus OX=10090 GN=Hdac2 PE=1 SV=1	P70288	Histone deacetylase 2	Hdac2	19432	17659	19540	21474	12086	15680	15069	21541	19086		7	7	39.3
	sp|O88895|HDAC3_MOUSE Histone deacetylase 3 OS=Mus musculus OX=10090 GN=Hdac3 PE=1 SV=1	O88895;O88895-2	Histone deacetylase 3	Hdac3	9563	0	0	3823	4595	5888	3212	6819	6018		5	5	17.2
	sp|Q8C2B3-5|HDAC7_MOUSE Isoform 5 of Histone deacetylase 7 OS=Mus musculus OX=10090 GN=Hdac7;sp|Q8C2B3|HDAC7_MOUSE Histone deacetylase 7 OS=Mus musculus OX=10090 GN=Hdac7 PE=1 SV=2;sp|Q8C2B3-2|HDAC7_MOUSE Isoform 2 of Histone deacetylase 7 OS=Mus musculus	Q8C2B3-5;Q8C2B3;Q8C2B3-2;Q8C2B3-3;Q8C2B3-6;Q8C2B3-4	Histone deacetylase 7	Hdac7	3109	1266	1225	619	615	948	1027	2104	2543		4	4	8.3
	sp|P51859|HDGF_MOUSE Hepatoma-derived growth factor OS=Mus musculus OX=10090 GN=Hdgf PE=1 SV=2	P51859	Hepatoma-derived growth factor	Hdgf	269762	275001	379119	239671	339854	258507	262317	261546	263516		12	12	65.4
	sp|Q3UMU9-4|HDGR2_MOUSE Isoform 4 of Hepatoma-derived growth factor-related protein 2 OS=Mus musculus OX=10090 GN=Hdgfl2;sp|Q3UMU9-2|HDGR2_MOUSE Isoform 2 of Hepatoma-derived growth factor-related protein 2 OS=Mus musculus OX=10090 GN=Hdgfl2;sp|Q3UMU9|HDGR	Q3UMU9-4;Q3UMU9-2;Q3UMU9;Q3UMU9-3	Hepatoma-derived growth factor-related protein 2	Hdgfrp2	5559	6129	3846	5324	2646	2711	2627	3618	1747		3	2	6
	sp|Q3UGR5|HDHD2_MOUSE Haloacid dehalogenase-like hydrolase domain-containing protein 2 OS=Mus musculus OX=10090 GN=Hdhd2 PE=1 SV=2	Q3UGR5;Q3UGR5-2	Haloacid dehalogenase-like hydrolase domain-containing protein 2	Hdhd2	17318	8240	13619	2886	0	0	26870	0	4247		3	3	27.8
	sp|Q8VDJ3|VIGLN_MOUSE Vigilin OS=Mus musculus OX=10090 GN=Hdlbp PE=1 SV=1	Q8VDJ3	Vigilin	Hdlbp	99334	81724	95814	66396	56943	61462	71288	58425	57166		46	46	45.9
	tr|G3X9B1|G3X9B1_MOUSE HEAT repeat-containing 1 OS=Mus musculus OX=10090 GN=Heatr1 PE=1 SV=1	G3X9B1;A0A1Y7VNI1;A0A1Y7VNG8		Heatr1	23750	26043	35958	23063	19318	20124	26553	20901	22816		49	49	28.1
	sp|Q8BQM4|HEAT3_MOUSE HEAT repeat-containing protein 3 OS=Mus musculus OX=10090 GN=Heatr3 PE=1 SV=1	Q8BQM4	HEAT repeat-containing protein 3	Heatr3	6234	5794	8007	2639	4816	5811	2957	6438	7895		8	8	16.9
	sp|Q8C547|HTR5B_MOUSE HEAT repeat-containing protein 5B OS=Mus musculus OX=10090 GN=Heatr5b PE=1 SV=3	Q8C547;Q8C547-3;Q8C547-2;Q8C547-4	HEAT repeat-containing protein 5B	Heatr5b	211	262	2711	1064	0	268	697	455	960		10	10	9.3
	sp|Q6P1G0|HEAT6_MOUSE HEAT repeat-containing protein 6 OS=Mus musculus OX=10090 GN=Heatr6 PE=1 SV=1	Q6P1G0	HEAT repeat-containing protein 6	Heatr6	446	437	2587	1292	0	579	2002	877	698		6	6	8
	sp|Q69ZR2|HECD1_MOUSE E3 ubiquitin-protein ligase HECTD1 OS=Mus musculus OX=10090 GN=Hectd1 PE=1 SV=2	Q69ZR2	E3 ubiquitin-protein ligase HECTD1	Hectd1	10246	4835	6885	4430	4176	6143	6152	4911	4489		32	32	17.5
	sp|Q3U487|HECD3_MOUSE E3 ubiquitin-protein ligase HECTD3 OS=Mus musculus OX=10090 GN=Hectd3 PE=1 SV=2	Q3U487	E3 ubiquitin-protein ligase HECTD3	Hectd3	1201	1254	323	2325	0	721	1588	0	0		6	6	9.8
	sp|Q6NVF4|HELB_MOUSE DNA helicase B OS=Mus musculus OX=10090 GN=Helb PE=1 SV=2	Q6NVF4	DNA helicase B	Helb	1660	3273	0	2045	1820	908	3003	1839	2458		7	7	7.3
	sp|Q60848-2|HELLS_MOUSE Isoform 2 of Lymphocyte-specific helicase OS=Mus musculus OX=10090 GN=Hells;sp|Q60848|HELLS_MOUSE Lymphocyte-specific helicase OS=Mus musculus OX=10090 GN=Hells PE=1 SV=2	Q60848-2;Q60848	Lymphocyte-specific helicase	Hells	19797	19232	21445	19701	16974	10910	18837	15140	14857		15	15	21.8
	sp|Q6DFV5-2|HELZ_MOUSE Isoform 2 of Probable helicase with zinc finger domain OS=Mus musculus OX=10090 GN=Helz;sp|Q6DFV5|HELZ_MOUSE Probable helicase with zinc finger domain OS=Mus musculus OX=10090 GN=Helz PE=1 SV=2;sp|Q6DFV5-3|HELZ_MOUSE Isoform 3 of Pro	Q6DFV5-2;Q6DFV5;Q6DFV5-3	Probable helicase with zinc finger domain	Helz	207	0	123	1066	196	127	204	308	0		4	4	3.5
	sp|E9QAM5|HELZ2_MOUSE Helicase with zinc finger domain 2 OS=Mus musculus OX=10090 GN=Helz2 PE=1 SV=1	E9QAM5	Helicase with zinc finger domain 2	Helz2	2566	247	1409	950	300	879	1390	755	0		6	6	3
	sp|Q9ERZ0|HEMGN_MOUSE Hemogen OS=Mus musculus OX=10090 GN=Hemgn PE=1 SV=1	Q9ERZ0	Hemogen	Hemgn	2129	4305	5632	2012	7471	13538	11691	4415	3988		10	10	31.2
	sp|Q6PAV2|HERC4_MOUSE Probable E3 ubiquitin-protein ligase HERC4 OS=Mus musculus OX=10090 GN=Herc4 PE=1 SV=2;sp|Q6PAV2-2|HERC4_MOUSE Isoform 2 of Probable E3 ubiquitin-protein ligase HERC4 OS=Mus musculus OX=10090 GN=Herc4	Q6PAV2;Q6PAV2-2;Q6PAV2-3	Probable E3 ubiquitin-protein ligase HERC4	Herc4	437	703	5516	3326	1655	4369	4877	3464	2920		11	11	14.2
	sp|P20060|HEXB_MOUSE Beta-hexosaminidase subunit beta OS=Mus musculus OX=10090 GN=Hexb PE=1 SV=2	P20060	Beta-hexosaminidase subunit beta	Hexb	7563	1837	2924	10792	13999	5798	6961	4019	5540		12	12	26.3
	sp|Q8R409|HEXI1_MOUSE Protein HEXIM1 OS=Mus musculus OX=10090 GN=Hexim1 PE=1 SV=1	Q8R409	Protein HEXIM1	Hexim1	3966	2849	12127	1286	3543	0	1991	5123	2955		4	4	17.1
	sp|Q8C3I8|HGH1_MOUSE Protein HGH1 homolog OS=Mus musculus OX=10090 GN=Hgh1 PE=1 SV=1	Q8C3I8	Protein HGH1 homolog	Hgh1	2900	2690	3604	3386	3557	3724	2657	4177	2651		2	2	6.6
	sp|Q99LI8|HGS_MOUSE Hepatocyte growth factor-regulated tyrosine kinase substrate OS=Mus musculus OX=10090 GN=Hgs PE=1 SV=2	Q99LI8	Hepatocyte growth factor-regulated tyrosine kinase substrate	Hgs	5665	4588	4418	1599	1886	3050	2972	2067	1984		6	6	10.7
	sp|Q99L13|3HIDH_MOUSE 3-hydroxyisobutyrate dehydrogenase, mitochondrial OS=Mus musculus OX=10090 GN=Hibadh PE=1 SV=1	Q99L13	3-hydroxyisobutyrate dehydrogenase, mitochondrial	Hibadh	0	1744	13188	0	0	5802	1161	4956	3640		5	5	23.6
	sp|P70349|HINT1_MOUSE Histidine triad nucleotide-binding protein 1 OS=Mus musculus OX=10090 GN=Hint1 PE=1 SV=3	P70349	Histidine triad nucleotide-binding protein 1	Hint1	35207	132022	190198	152647	90884	157115	137258	158391	121237		6	6	71.4
	sp|Q8VD75|HIP1_MOUSE Huntingtin-interacting protein 1 OS=Mus musculus OX=10090 GN=Hip1 PE=1 SV=2	Q8VD75	Huntingtin-interacting protein 1	Hip1	6109	0	6011	6920	6745	1665	8336	5722	3123		16	16	21.4
	sp|Q9JKY5|HIP1R_MOUSE Huntingtin-interacting protein 1-related protein OS=Mus musculus OX=10090 GN=Hip1r PE=1 SV=2	Q9JKY5	Huntingtin-interacting protein 1-related protein	Hip1r	5039	3851	12418	6274	3386	3173	5654	3070	5478		18	16	20.5
	sp|Q8BLH7|HIRP3_MOUSE HIRA-interacting protein 3 OS=Mus musculus OX=10090 GN=Hirip3 PE=1 SV=1	Q8BLH7	HIRA-interacting protein 3	Hirip3	0	0	0	2188	6541	3584	3282	2735	4008		2	2	5.7
	sp|P43275|H11_MOUSE Histone H1.1 OS=Mus musculus OX=10090 GN=Hist1h1a PE=1 SV=2	P43275	Histone H1.1	Hist1h1a	1813280	1693190	2353250	2136810	1805400	2184800	1850040	1833250	1729640		15	15	48.8
	sp|P43276|H15_MOUSE Histone H1.5 OS=Mus musculus OX=10090 GN=Hist1h1b PE=1 SV=2	P43276	Histone H1.5	Hist1h1b	6564570	6188040	6560460	6443520	7888470	7896280	6790720	6285700	6733420		13	13	51.1
	sp|P15864|H12_MOUSE Histone H1.2 OS=Mus musculus OX=10090 GN=Hist1h1c PE=1 SV=2	P15864	Histone H1.2	Hist1h1c	1742190	1621610	1555200	1694720	1708520	1914010	2061630	1889630	1728370		9	9	59
	sp|P43277|H13_MOUSE Histone H1.3 OS=Mus musculus OX=10090 GN=Hist1h1d PE=1 SV=2	P43277	Histone H1.3	Hist1h1d	6229710	5168190	5606330	6551830	7014930	6555860	5869360	5937130	5609770		7	3	56.1
	sp|P43274|H14_MOUSE Histone H1.4 OS=Mus musculus OX=10090 GN=Hist1h1e PE=1 SV=2	P43274	Histone H1.4	Hist1h1e	13894400	15336500	13970300	13985000	15474400	14979200	15817400	15622500	16533200		30	8	57.1
	sp|C0HKE9|H2A1P_MOUSE Histone H2A type 1-P OS=Mus musculus OX=10090 GN=Hist1h2ap PE=1 SV=1;sp|C0HKE8|H2A1O_MOUSE Histone H2A type 1-O OS=Mus musculus OX=10090 GN=Hist1h2ao PE=1 SV=1;sp|C0HKE7|H2A1N_MOUSE Histone H2A type 1-N OS=Mus musculus OX=10090 GN=His	C0HKE9;C0HKE8;C0HKE7;C0HKE6;C0HKE5;C0HKE4;C0HKE3;C0HKE2;C0HKE1;Q8CGP6;Q8CGP5	Histone H2A type 1-H;Histone H2A type 1-F	Hist1h2ah;Hist1h2af	13802600	10850700	7349340	5898620	4783610	10142300	7598690	12573300	13242900		18	0	54.6
	sp|Q8CGP2|H2B1P_MOUSE Histone H2B type 1-P OS=Mus musculus OX=10090 GN=Hist1h2bp PE=1 SV=3;sp|Q64475|H2B1B_MOUSE Histone H2B type 1-B OS=Mus musculus OX=10090 GN=Hist1h2bb PE=1 SV=3;sp|P10853|H2B1F_MOUSE Histone H2B type 1-F/J/L OS=Mus musculus OX=10090 GN	Q8CGP2;Q64475;P10853;Q8CGP2-2;Q8CGP1;P70696	Histone H2B type 1-P;Histone H2B type 1-B;Histone H2B type 1-F/J/L;Histone H2B type 1-K;Histone H2B type 1-A	Hist1h2bp;Hist1h2bb;Hist1h2bf;Hist1h2bk;Hist1h2ba	30783	65326	40598	48645	60079	160779	8950	6444	91344		4	0	74.6
	sp|P84228|H32_MOUSE Histone H3.2 OS=Mus musculus OX=10090 GN=Hist1h3b PE=1 SV=2	P84228	Histone H3.2	Hist1h3b	72728700	71347900	68740600	66641400	72751600	66722100	70599600	59922800	62473300		22	2	74.3
	sp|P62806|H4_MOUSE Histone H4 OS=Mus musculus OX=10090 GN=Hist1h4a PE=1 SV=2	P62806	Histone H4	Hist1h4a	58736800	61239300	61571500	68776700	57175600	58925600	68632800	69579400	61302300		22	22	71.8
	sp|Q64522|H2A2B_MOUSE Histone H2A type 2-B OS=Mus musculus OX=10090 GN=Hist2h2ab PE=1 SV=3	Q64522	Histone H2A type 2-B	Hist2h2ab	55605	34586	32099	57312	74724	50428	88679	73149	76881		2	2	50
	sp|Q64525|H2B2B_MOUSE Histone H2B type 2-B OS=Mus musculus OX=10090 GN=Hist2h2bb PE=1 SV=3;sp|Q6ZWY9|H2B1C_MOUSE Histone H2B type 1-C/E/G OS=Mus musculus OX=10090 GN=Hist1h2bc PE=1 SV=3;sp|Q64478|H2B1H_MOUSE Histone H2B type 1-H OS=Mus musculus OX=10090 GN	Q64525;Q6ZWY9;Q64478;P10854	Histone H2B type 2-B;Histone H2B type 1-C/E/G;Histone H2B type 1-H;Histone H2B type 1-M	Hist2h2bb;Hist1h2bc;Hist1h2bh;Hist1h2bm	41436700	45769500	51052700	48397700	47818400	46683000	38877700	47349300	47691700		26	6	83.3
	sp|Q8BFU2|H2A3_MOUSE Histone H2A type 3 OS=Mus musculus OX=10090 GN=Hist3h2a PE=1 SV=3;tr|Q8CGP4|Q8CGP4_MOUSE Histone H2A OS=Mus musculus OX=10090 GN=Hist1h2aa PE=1 SV=1	Q8BFU2;Q8CGP4	Histone H2A type 3;Histone H2A	Hist3h2a;Hist1h2aa	0	21442	17715	0	57369	35921	0	0	26842		1	0	54.6
	sp|Q8CGP0|H2B3B_MOUSE Histone H2B type 3-B OS=Mus musculus OX=10090 GN=Hist3h2bb PE=1 SV=3;sp|Q9D2U9|H2B3A_MOUSE Histone H2B type 3-A OS=Mus musculus OX=10090 GN=Hist3h2ba PE=1 SV=3;sp|Q64524|H2B2E_MOUSE Histone H2B type 2-E OS=Mus musculus OX=10090 GN=His	Q8CGP0;Q9D2U9;Q64524	Histone H2B type 3-B;Histone H2B type 3-A;Histone H2B type 2-E	Hist3h2bb;Hist3h2ba;Hist2h2be	71526	79094	73217	67140	68052	56724	73351	55514	58135		1	1	66.7
	sp|P17710-3|HXK1_MOUSE Isoform HK1 of Hexokinase-1 OS=Mus musculus OX=10090 GN=Hk1;sp|P17710-4|HXK1_MOUSE Isoform HK1-SC of Hexokinase-1 OS=Mus musculus OX=10090 GN=Hk1;sp|P17710|HXK1_MOUSE Hexokinase-1 OS=Mus musculus OX=10090 GN=Hk1 PE=1 SV=3;sp|P17710-2	P17710-3;P17710-4;P17710;P17710-2	Hexokinase-1	Hk1	154192	103019	137483	104806	97115	118569	127257	93815	71508		41	33	49.1
	sp|O08528|HXK2_MOUSE Hexokinase-2 OS=Mus musculus OX=10090 GN=Hk2 PE=1 SV=1	O08528;Q3TRM8	Hexokinase-2	Hk2	78969	56379	77264	41165	39527	45946	61991	52972	53027		27	26	40.7
	sp|Q9D8V0-4|HM13_MOUSE Isoform 4 of Minor histocompatibility antigen H13 OS=Mus musculus OX=10090 GN=Hm13	Q9D8V0-4	Minor histocompatibility antigen H13	Hm13	2819	3154	4428	3768	2942	2813	2813	2590	3049		1	1	21.3
	sp|Q9D8V0|HM13_MOUSE Minor histocompatibility antigen H13 OS=Mus musculus OX=10090 GN=Hm13 PE=1 SV=1;sp|Q9D8V0-3|HM13_MOUSE Isoform 3 of Minor histocompatibility antigen H13 OS=Mus musculus OX=10090 GN=Hm13	Q9D8V0;Q9D8V0-3;Q9D8V0-2	Minor histocompatibility antigen H13	Hm13	158233	103723	152860	141550	96213	127754	148909	103152	98989		8	1	20.6
	sp|P22907-2|HEM3_MOUSE Isoform 2 of Porphobilinogen deaminase OS=Mus musculus OX=10090 GN=Hmbs;sp|P22907|HEM3_MOUSE Porphobilinogen deaminase OS=Mus musculus OX=10090 GN=Hmbs PE=1 SV=2	P22907-2;P22907	Porphobilinogen deaminase	Hmbs	10440	22794	9399	7977	14257	20285	11817	9299	5795		6	6	19.8
	sp|P17095|HMGA1_MOUSE High mobility group protein HMG-I/HMG-Y OS=Mus musculus OX=10090 GN=Hmga1 PE=1 SV=4	P17095	High mobility group protein HMG-I/HMG-Y	Hmga1	281394	254977	312651	240605	262537	260457	247428	206457	230762		3	2	23.4
	sp|P17095-1|HMGA1_MOUSE Isoform HMG-Y of High mobility group protein HMG-I/HMG-Y OS=Mus musculus OX=10090 GN=Hmga1	P17095-1	High mobility group protein HMG-I/HMG-Y	Hmga1	12134	18103	33153	10031	102211	61779	0	26458	66229		1	1	14.6
	sp|P63158|HMGB1_MOUSE High mobility group protein B1 OS=Mus musculus OX=10090 GN=Hmgb1 PE=1 SV=2	P63158	High mobility group protein B1	Hmgb1	1912860	1492820	2081410	1661640	1804840	1787740	1874080	1717240	1704840		11	11	48.8
	sp|P30681|HMGB2_MOUSE High mobility group protein B2 OS=Mus musculus OX=10090 GN=Hmgb2 PE=1 SV=3	P30681	High mobility group protein B2	Hmgb2	4654730	4803420	4586510	4172310	5403930	4443000	4373810	4118880	4345490		18	12	67.1
	sp|O54879|HMGB3_MOUSE High mobility group protein B3 OS=Mus musculus OX=10090 GN=Hmgb3 PE=1 SV=3	O54879	High mobility group protein B3	Hmgb3	0	42763	40886	24585	21103	0	0	0	7359		5	5	38
	sp|P38060|HMGCL_MOUSE Hydroxymethylglutaryl-CoA lyase, mitochondrial OS=Mus musculus OX=10090 GN=Hmgcl PE=1 SV=2	P38060	Hydroxymethylglutaryl-CoA lyase, mitochondrial	Hmgcl	933	812	1126	721	0	2777	5136	3636	912		4	4	12.3
	sp|Q8JZK9|HMCS1_MOUSE Hydroxymethylglutaryl-CoA synthase, cytoplasmic OS=Mus musculus OX=10090 GN=Hmgcs1 PE=1 SV=1	Q8JZK9;P54869	Hydroxymethylglutaryl-CoA synthase, cytoplasmic	Hmgcs1	136169	124713	134829	54801	49276	61557	74875	49888	60416		19	19	54.8
	sp|Q9JL35|HMGN5_MOUSE High mobility group nucleosome-binding domain-containing protein 5 OS=Mus musculus OX=10090 GN=Hmgn5 PE=1 SV=2	Q9JL35	High mobility group nucleosome-binding domain-containing protein 5	Hmgn5	12999	14452	18356	22809	30120	10227	12299	10833	13256		10	10	37.9
	sp|Q3TBD2|HMHA1_MOUSE Rho GTPase-activating protein 45 OS=Mus musculus OX=10090 GN=Arhgap45 PE=1 SV=2;sp|Q3TBD2-2|HMHA1_MOUSE Isoform 2 of Rho GTPase-activating protein 45 OS=Mus musculus OX=10090 GN=Arhgap45;sp|Q3TBD2-3|HMHA1_MOUSE Isoform 3 of Rho GTPase	Q3TBD2;Q3TBD2-2;Q3TBD2-3;Q3TBD2-4	Minor histocompatibility protein HA-1	Hmha1	45759	43434	54767	51162	50864	61274	57400	35177	59981		27	27	34.9
	sp|O70252|HMOX2_MOUSE Heme oxygenase 2 OS=Mus musculus OX=10090 GN=Hmox2 PE=1 SV=1	O70252	Heme oxygenase 2	Hmox2	114054	86162	101407	72358	54427	81149	89340	92736	65081		9	9	42.5
	sp|Q9CX86|ROA0_MOUSE Heterogeneous nuclear ribonucleoprotein A0 OS=Mus musculus OX=10090 GN=Hnrnpa0 PE=1 SV=1	Q9CX86	Heterogeneous nuclear ribonucleoprotein A0	Hnrnpa0	648194	540040	655780	529269	591638	510059	590024	487941	558680		11	11	53.8
	sp|P49312|ROA1_MOUSE Heterogeneous nuclear ribonucleoprotein A1 OS=Mus musculus OX=10090 GN=Hnrnpa1 PE=1 SV=2;sp|P49312-2|ROA1_MOUSE Isoform Short of Heterogeneous nuclear ribonucleoprotein A1 OS=Mus musculus OX=10090 GN=Hnrnpa1	P49312;P49312-2	Heterogeneous nuclear ribonucleoprotein A1;Heterogeneous nuclear ribonucleoprotein A1, N-terminally processed	Hnrnpa1	669331	766922	849030	424655	475882	385419	529790	601641	438512		17	17	54.1
	sp|O88569|ROA2_MOUSE Heterogeneous nuclear ribonucleoproteins A2/B1 OS=Mus musculus OX=10090 GN=Hnrnpa2b1 PE=1 SV=2;sp|O88569-2|ROA2_MOUSE Isoform 2 of Heterogeneous nuclear ribonucleoproteins A2/B1 OS=Mus musculus OX=10090 GN=Hnrnpa2b1	O88569;O88569-2	Heterogeneous nuclear ribonucleoproteins A2/B1	Hnrnpa2b1	3290720	3256770	3171540	2954790	2204110	2053610	3187330	2349040	2342710		32	3	73.4
	sp|Q8BG05|ROA3_MOUSE Heterogeneous nuclear ribonucleoprotein A3 OS=Mus musculus OX=10090 GN=Hnrnpa3 PE=1 SV=1	Q8BG05	Heterogeneous nuclear ribonucleoprotein A3	Hnrnpa3	27849	23748	33772	20570	30343	24828	19779	17930	16947		1	1	55.9
	sp|Q8BG05-2|ROA3_MOUSE Isoform 2 of Heterogeneous nuclear ribonucleoprotein A3 OS=Mus musculus OX=10090 GN=Hnrnpa3	Q8BG05-2	Heterogeneous nuclear ribonucleoprotein A3	Hnrnpa3	1979470	3068360	4027100	2139500	2336340	1591890	2026120	1894970	2286470		26	2	56.9
	sp|Q99020|ROAA_MOUSE Heterogeneous nuclear ribonucleoprotein A/B OS=Mus musculus OX=10090 GN=Hnrnpab PE=1 SV=1	Q99020	Heterogeneous nuclear ribonucleoprotein A/B	Hnrnpab	1016760	1102430	1126340	753547	686047	768440	935215	831462	939334		10	10	28.1
	sp|Q9Z204-2|HNRPC_MOUSE Isoform C1 of Heterogeneous nuclear ribonucleoproteins C1/C2 OS=Mus musculus OX=10090 GN=Hnrnpc;sp|Q9Z204-4|HNRPC_MOUSE Isoform 4 of Heterogeneous nuclear ribonucleoproteins C1/C2 OS=Mus musculus OX=10090 GN=Hnrnpc;sp|Q9Z204-3|HNRPC	Q9Z204-2;Q9Z204-4;Q9Z204-3	Heterogeneous nuclear ribonucleoproteins C1/C2	Hnrnpc	892232	797942	1160400	797667	712684	924158	969431	903198	832565		18	3	47.7
	sp|Q9Z204|HNRPC_MOUSE Heterogeneous nuclear ribonucleoproteins C1/C2 OS=Mus musculus OX=10090 GN=Hnrnpc PE=1 SV=1;sp|Q9Z204-5|HNRPC_MOUSE Isoform 5 of Heterogeneous nuclear ribonucleoproteins C1/C2 OS=Mus musculus OX=10090 GN=Hnrnpc	Q9Z204;Q9Z204-5	Heterogeneous nuclear ribonucleoproteins C1/C2	Hnrnpc	13811	13134	32263	10320	0	0	15220	12837	12964		2	2	49.8
	sp|Q60668-3|HNRPD_MOUSE Isoform 3 of Heterogeneous nuclear ribonucleoprotein D0 OS=Mus musculus OX=10090 GN=Hnrnpd;sp|Q60668|HNRPD_MOUSE Heterogeneous nuclear ribonucleoprotein D0 OS=Mus musculus OX=10090 GN=Hnrnpd PE=1 SV=2;sp|Q60668-4|HNRPD_MOUSE Isoform	Q60668-3;Q60668;Q60668-4;Q60668-2	Heterogeneous nuclear ribonucleoprotein D0	Hnrnpd	937919	796258	1094500	809546	887347	861762	1023570	914911	890159		14	12	36.9
	sp|Q9Z130|HNRDL_MOUSE Heterogeneous nuclear ribonucleoprotein D-like OS=Mus musculus OX=10090 GN=Hnrnpdl PE=1 SV=1	Q9Z130	Heterogeneous nuclear ribonucleoprotein D-like	Hnrnpdl	104289	116125	107426	116082	113197	133532	136275	125786	113680		6	6	26.6
	sp|Q9Z2X1|HNRPF_MOUSE Heterogeneous nuclear ribonucleoprotein F OS=Mus musculus OX=10090 GN=Hnrnpf PE=1 SV=3;sp|Q9Z2X1-2|HNRPF_MOUSE Isoform 2 of Heterogeneous nuclear ribonucleoprotein F OS=Mus musculus OX=10090 GN=Hnrnpf	Q9Z2X1;Q9Z2X1-2	Heterogeneous nuclear ribonucleoprotein F;Heterogeneous nuclear ribonucleoprotein F, N-terminally processed	Hnrnpf	819469	689046	893552	750012	539910	736664	946569	564183	711010		23	21	67.7
	sp|O35737|HNRH1_MOUSE Heterogeneous nuclear ribonucleoprotein H OS=Mus musculus OX=10090 GN=Hnrnph1 PE=1 SV=3	O35737;D3Z6Y3	Heterogeneous nuclear ribonucleoprotein H;Heterogeneous nuclear ribonucleoprotein H, N-terminally processed	Hnrnph1	242609	168648	269242	236985	129800	204626	283374	243333	157219		17	11	52.8
	sp|P70333|HNRH2_MOUSE Heterogeneous nuclear ribonucleoprotein H2 OS=Mus musculus OX=10090 GN=Hnrnph2 PE=1 SV=1	P70333	Heterogeneous nuclear ribonucleoprotein H2	Hnrnph2	37917	16550	9126	19512	6975	10215	31678	21989	9511		4	4	32.3
	tr|D3YWT1|D3YWT1_MOUSE Heterogeneous nuclear ribonucleoprotein H3 OS=Mus musculus OX=10090 GN=Hnrnph3 PE=1 SV=1;tr|D3Z3N4|D3Z3N4_MOUSE Heterogeneous nuclear ribonucleoprotein H3 OS=Mus musculus OX=10090 GN=Hnrnph3 PE=1 SV=1	D3YWT1;D3Z3N4		Hnrnph3	13377	21734	26860	20061	15855	19578	19348	12309	19195		4	4	18.7
	sp|P61979-3|HNRPK_MOUSE Isoform 3 of Heterogeneous nuclear ribonucleoprotein K OS=Mus musculus OX=10090 GN=Hnrnpk	P61979-3	Heterogeneous nuclear ribonucleoprotein K	Hnrnpk	10014	6742	0	7117	8049	8942	9888	10210	0		1	1	67.4
	sp|P61979|HNRPK_MOUSE Heterogeneous nuclear ribonucleoprotein K OS=Mus musculus OX=10090 GN=Hnrnpk PE=1 SV=1;sp|P61979-2|HNRPK_MOUSE Isoform 2 of Heterogeneous nuclear ribonucleoprotein K OS=Mus musculus OX=10090 GN=Hnrnpk	P61979;P61979-2	Heterogeneous nuclear ribonucleoprotein K	Hnrnpk	1291300	1175320	1320770	1243270	866228	1094240	1347280	1125300	988682		32	2	69.1
	sp|Q8R081|HNRPL_MOUSE Heterogeneous nuclear ribonucleoprotein L OS=Mus musculus OX=10090 GN=Hnrnpl PE=1 SV=2	Q8R081	Heterogeneous nuclear ribonucleoprotein L	Hnrnpl	429071	399907	451325	453695	379923	419852	486224	403687	382116		26	26	62.8
	sp|Q921F4|HNRLL_MOUSE Heterogeneous nuclear ribonucleoprotein L-like OS=Mus musculus OX=10090 GN=Hnrnpll PE=1 SV=3	Q921F4;Q921F4-4;Q921F4-5	Heterogeneous nuclear ribonucleoprotein L-like	Hnrnpll	55570	38605	46693	66727	42527	46580	53017	40981	38199		18	18	44.7
	sp|Q9D0E1-2|HNRPM_MOUSE Isoform 2 of Heterogeneous nuclear ribonucleoprotein M OS=Mus musculus OX=10090 GN=Hnrnpm;sp|Q9D0E1|HNRPM_MOUSE Heterogeneous nuclear ribonucleoprotein M OS=Mus musculus OX=10090 GN=Hnrnpm PE=1 SV=3	Q9D0E1-2;Q9D0E1	Heterogeneous nuclear ribonucleoprotein M	Hnrnpm	582059	457273	467547	557960	519053	558891	566444	422798	443310		37	36	64.2
	tr|Q8VHM5|Q8VHM5_MOUSE Heterogeneous nuclear ribonucleoprotein R OS=Mus musculus OX=10090 GN=Hnrnpr PE=1 SV=1;tr|F7B5B5|F7B5B5_MOUSE Heterogeneous nuclear ribonucleoprotein R OS=Mus musculus OX=10090 GN=Hnrnpr PE=1 SV=1;tr|A2AW41|A2AW41_MOUSE Heterogeneous	Q8VHM5;F7B5B5;A2AW41;V9GWW3;S4R1E9;A2AW40		Hnrnpr	61022	55068	93222	88340	65970	64651	87176	79942	74362		18	18	43
	sp|Q8VEK3|HNRPU_MOUSE Heterogeneous nuclear ribonucleoprotein U OS=Mus musculus OX=10090 GN=Hnrnpu PE=1 SV=1;sp|Q8VEK3-2|HNRPU_MOUSE Isoform 2 of Heterogeneous nuclear ribonucleoprotein U OS=Mus musculus OX=10090 GN=Hnrnpu	Q8VEK3;Q8VEK3-2	Heterogeneous nuclear ribonucleoprotein U	Hnrnpu	863675	773401	866575	763261	720207	733905	955863	625467	726935		40	40	44.5
	sp|Q8VDM6|HNRL1_MOUSE Heterogeneous nuclear ribonucleoprotein U-like protein 1 OS=Mus musculus OX=10090 GN=Hnrnpul1 PE=1 SV=1;sp|Q8VDM6-2|HNRL1_MOUSE Isoform 2 of Heterogeneous nuclear ribonucleoprotein U-like protein 1 OS=Mus musculus OX=10090 GN=Hnrnpul1	Q8VDM6;Q8VDM6-2;Q8VDM6-3	Heterogeneous nuclear ribonucleoprotein U-like protein 1	Hnrnpul1	36268	48462	43098	53909	44952	62470	49039	48788	44122		20	20	34
	sp|Q00PI9|HNRL2_MOUSE Heterogeneous nuclear ribonucleoprotein U-like protein 2 OS=Mus musculus OX=10090 GN=Hnrnpul2 PE=1 SV=2	Q00PI9	Heterogeneous nuclear ribonucleoprotein U-like protein 2	Hnrnpul2	136066	126240	111094	109314	103475	100460	137323	84952	87063		24	24	36.4
	sp|Q8BUK6|HOOK3_MOUSE Protein Hook homolog 3 OS=Mus musculus OX=10090 GN=Hook3 PE=1 SV=2	Q8BUK6	Protein Hook homolog 3	Hook3	0	0	892	1659	0	869	0	768	850		3	3	5.7
	sp|Q3TEA8-2|HP1B3_MOUSE Isoform 2 of Heterochromatin protein 1-binding protein 3 OS=Mus musculus OX=10090 GN=Hp1bp3	Q3TEA8-2	Heterochromatin protein 1-binding protein 3	Hp1bp3	0	0	0	1912	3402	2189	1986	1662	0		1	1	45.3
	sp|Q3TEA8|HP1B3_MOUSE Heterochromatin protein 1-binding protein 3 OS=Mus musculus OX=10090 GN=Hp1bp3 PE=1 SV=1;sp|Q3TEA8-3|HP1B3_MOUSE Isoform 3 of Heterochromatin protein 1-binding protein 3 OS=Mus musculus OX=10090 GN=Hp1bp3	Q3TEA8;Q3TEA8-3	Heterochromatin protein 1-binding protein 3	Hp1bp3	279216	226301	263707	322739	303349	296455	379226	258332	294929		23	1	46.6
	sp|P62748|HPCL1_MOUSE Hippocalcin-like protein 1 OS=Mus musculus OX=10090 GN=Hpcal1 PE=1 SV=2;sp|P84075|HPCA_MOUSE Neuron-specific calcium-binding protein hippocalcin OS=Mus musculus OX=10090 GN=Hpca PE=1 SV=2	P62748;P84075	Hippocalcin-like protein 1;Neuron-specific calcium-binding protein hippocalcin	Hpcal1;Hpca	3463	3161	6201	2829	2992	17959	5482	11026	3557		2	2	10.9
	sp|P00493|HPRT_MOUSE Hypoxanthine-guanine phosphoribosyltransferase OS=Mus musculus OX=10090 GN=Hprt1 PE=1 SV=3	P00493	Hypoxanthine-guanine phosphoribosyltransferase	Hprt1	641013	754705	672069	638654	597349	551129	649743	532513	469871		15	15	80.7
	sp|O08756|HCD2_MOUSE 3-hydroxyacyl-CoA dehydrogenase type-2 OS=Mus musculus OX=10090 GN=Hsd17b10 PE=1 SV=4	O08756	3-hydroxyacyl-CoA dehydrogenase type-2	Hsd17b10	61830	102382	56754	117306	98525	126542	142107	48105	54139		10	10	42.1
	sp|O70503|DHB12_MOUSE Very-long-chain 3-oxoacyl-CoA reductase OS=Mus musculus OX=10090 GN=Hsd17b12 PE=1 SV=1;sp|O70503-2|DHB12_MOUSE Isoform 2 of Very-long-chain 3-oxoacyl-CoA reductase OS=Mus musculus OX=10090 GN=Hsd17b12	O70503;O70503-2	Very-long-chain 3-oxoacyl-CoA reductase	Hsd17b12	75041	72503	68466	70490	72663	72124	86680	71594	72167		9	9	34.9
	sp|P51660|DHB4_MOUSE Peroxisomal multifunctional enzyme type 2 OS=Mus musculus OX=10090 GN=Hsd17b4 PE=1 SV=3	P51660	Peroxisomal multifunctional enzyme type 2;(3R)-hydroxyacyl-CoA dehydrogenase;Enoyl-CoA hydratase 2	Hsd17b4	11601	14349	10404	13602	15035	13935	17836	13904	14770		16	16	29.1
	sp|O88736|DHB7_MOUSE 3-keto-steroid reductase OS=Mus musculus OX=10090 GN=Hsd17b7 PE=1 SV=1	O88736	3-keto-steroid reductase	Hsd17b7	0	0	0	2473	0	2898	3649	3455	0		2	2	8.7
	sp|Q8BTX9|HSDL1_MOUSE Inactive hydroxysteroid dehydrogenase-like protein 1 OS=Mus musculus OX=10090 GN=Hsdl1 PE=1 SV=1	Q8BTX9	Inactive hydroxysteroid dehydrogenase-like protein 1	Hsdl1	0	2749	2741	4463	621	1046	6308	904	1888		4	4	13.9
	sp|Q2TPA8|HSDL2_MOUSE Hydroxysteroid dehydrogenase-like protein 2 OS=Mus musculus OX=10090 GN=Hsdl2 PE=1 SV=1	Q2TPA8	Hydroxysteroid dehydrogenase-like protein 2	Hsdl2	9991	8170	7035	1915	4825	8280	7568	7783	4914		6	6	16.9
	sp|P07901|HS90A_MOUSE Heat shock protein HSP 90-alpha OS=Mus musculus OX=10090 GN=Hsp90aa1 PE=1 SV=4	P07901	Heat shock protein HSP 90-alpha	Hsp90aa1	1024000	1018170	1170800	832029	740533	766155	1049140	786885	926491		35	35	63.6
	sp|P11499|HS90B_MOUSE Heat shock protein HSP 90-beta OS=Mus musculus OX=10090 GN=Hsp90ab1 PE=1 SV=3	P11499;REV__Q8BL66	Heat shock protein HSP 90-beta	Hsp90ab1	4247150	3742100	4701850	2934110	3188730	2627070	3667900	3009630	3078520		57	42	65.7
	sp|P08113|ENPL_MOUSE Endoplasmin OS=Mus musculus OX=10090 GN=Hsp90b1 PE=1 SV=2	P08113	Endoplasmin	Hsp90b1	1152840	1306170	1409430	974194	1040430	1004450	1219670	1125390	1057880		40	40	55.6
	sp|Q8BM72|HSP13_MOUSE Heat shock 70 kDa protein 13 OS=Mus musculus OX=10090 GN=Hspa13 PE=1 SV=1;sp|Q8BM72-2|HSP13_MOUSE Isoform 2 of Heat shock 70 kDa protein 13 OS=Mus musculus OX=10090 GN=Hspa13	Q8BM72;Q8BM72-2	Heat shock 70 kDa protein 13	Hspa13	0	0	1851	0	1278	1607	1884	1317	0		2	2	6.2
	sp|Q99M31|HSP7E_MOUSE Heat shock 70 kDa protein 14 OS=Mus musculus OX=10090 GN=Hspa14 PE=1 SV=2;sp|Q99M31-2|HSP7E_MOUSE Isoform 2 of Heat shock 70 kDa protein 14 OS=Mus musculus OX=10090 GN=Hspa14	Q99M31;Q99M31-2	Heat shock 70 kDa protein 14	Hspa14	61796	65049	97366	71450	49125	61213	65467	60695	45904		16	16	52.7
	sp|Q61696|HS71A_MOUSE Heat shock 70 kDa protein 1A OS=Mus musculus OX=10090 GN=Hspa1a PE=1 SV=2;sp|P17879|HS71B_MOUSE Heat shock 70 kDa protein 1B OS=Mus musculus OX=10090 GN=Hspa1b PE=1 SV=3	Q61696;P17879	Heat shock 70 kDa protein 1A;Heat shock 70 kDa protein 1B	Hspa1a;Hspa1b	0	4942	3859	0	3705	0	0	4419	3062		2	2	13.6
	sp|Q61316|HSP74_MOUSE Heat shock 70 kDa protein 4 OS=Mus musculus OX=10090 GN=Hspa4 PE=1 SV=1	Q61316	Heat shock 70 kDa protein 4	Hspa4	302871	291038	323258	276491	257238	234999	267538	217785	257710		41	39	56.1
	sp|P20029|BIP_MOUSE Endoplasmic reticulum chaperone BiP OS=Mus musculus OX=10090 GN=Hspa5 PE=1 SV=3	P20029	78 kDa glucose-regulated protein	Hspa5	1648990	1368250	1752540	1154810	1139440	1181210	1186630	1340370	926228		43	40	57.9
	sp|P63017|HSP7C_MOUSE Heat shock cognate 71 kDa protein OS=Mus musculus OX=10090 GN=Hspa8 PE=1 SV=1	P63017;P17156	Heat shock cognate 71 kDa protein	Hspa8	2880690	2801080	2923830	2024260	1785280	1921060	2482360	2163670	1925810		39	33	65.8
	sp|P38647|GRP75_MOUSE Stress-70 protein, mitochondrial OS=Mus musculus OX=10090 GN=Hspa9 PE=1 SV=3	P38647	Stress-70 protein, mitochondrial	Hspa9	619598	653345	587530	513554	386718	367207	524650	415367	480165		34	34	55.8
	sp|Q99P31|HPBP1_MOUSE Hsp70-binding protein 1 OS=Mus musculus OX=10090 GN=Hspbp1 PE=1 SV=1	Q99P31	Hsp70-binding protein 1	Hspbp1	24987	41577	103171	84509	13796	48523	64184	46290	43338		12	12	48.2
	sp|P63038|CH60_MOUSE 60 kDa heat shock protein, mitochondrial OS=Mus musculus OX=10090 GN=Hspd1 PE=1 SV=1	P63038;P63038-2	60 kDa heat shock protein, mitochondrial	Hspd1	1169520	1141280	1299000	1058150	935964	1002450	1038520	888405	1019910		42	42	72.1
	sp|Q64433|CH10_MOUSE 10 kDa heat shock protein, mitochondrial OS=Mus musculus OX=10090 GN=Hspe1 PE=1 SV=2	Q64433	10 kDa heat shock protein, mitochondrial	Hspe1	529716	434621	410841	208308	322816	849637	437336	655178	455275		6	6	59.8
	sp|Q61699|HS105_MOUSE Heat shock protein 105 kDa OS=Mus musculus OX=10090 GN=Hsph1 PE=1 SV=2;sp|Q61699-2|HS105_MOUSE Isoform HSP105-beta of Heat shock protein 105 kDa OS=Mus musculus OX=10090 GN=Hsph1	Q61699;Q61699-2	Heat shock protein 105 kDa	Hsph1	104913	99386	132661	83032	86281	71329	96376	84024	105124		34	34	55.7
	sp|Q9Z2G9|HTAI2_MOUSE Oxidoreductase HTATIP2 OS=Mus musculus OX=10090 GN=Htatip2 PE=1 SV=3;sp|Q9Z2G9-2|HTAI2_MOUSE Isoform 2 of Oxidoreductase HTATIP2 OS=Mus musculus OX=10090 GN=Htatip2	Q9Z2G9;Q9Z2G9-2	Oxidoreductase HTATIP2	Htatip2	0	1474	1727	3448	727	11752	1955	1267	1471		5	5	35.1
	sp|Q8BGC0|HTSF1_MOUSE HIV Tat-specific factor 1 homolog OS=Mus musculus OX=10090 GN=Htatsf1 PE=1 SV=1	Q8BGC0;Q8BGC0-2	HIV Tat-specific factor 1 homolog	Htatsf1	3502	3151	1822	1080	1146	912	1418	1101	4385		5	5	11.5
	sp|Q9JIY5|HTRA2_MOUSE Serine protease HTRA2, mitochondrial OS=Mus musculus OX=10090 GN=Htra2 PE=1 SV=2	Q9JIY5	Serine protease HTRA2, mitochondrial	Htra2	1731	5706	3394	4947	5520	3861	6870	6261	2492		3	3	8.3
	sp|P42859|HD_MOUSE Huntingtin OS=Mus musculus OX=10090 GN=Htt PE=1 SV=2;sp|P42859-2|HD_MOUSE Isoform Short of Huntingtin OS=Mus musculus OX=10090 GN=Htt	P42859;P42859-2	Huntingtin	Htt	248	410	937	665	387	439	613	260	569		9	9	4.4
	sp|Q8BQY8|HUS1_MOUSE Checkpoint protein HUS1 OS=Mus musculus OX=10090 GN=Hus1 PE=2 SV=1;sp|Q8BQY8-2|HUS1_MOUSE Isoform 2 of Checkpoint protein HUS1 OS=Mus musculus OX=10090 GN=Hus1;sp|Q8BQY8-3|HUS1_MOUSE Isoform 3 of Checkpoint protein HUS1 OS=Mus musculus	Q8BQY8;Q8BQY8-2;Q8BQY8-3	Checkpoint protein HUS1	Hus1	22580	3016	3251	3492	2463	2868	20945	2687	3048		2	2	7.1
	sp|Q7TMY8-3|HUWE1_MOUSE Isoform 3 of E3 ubiquitin-protein ligase HUWE1 OS=Mus musculus OX=10090 GN=Huwe1;sp|Q7TMY8|HUWE1_MOUSE E3 ubiquitin-protein ligase HUWE1 OS=Mus musculus OX=10090 GN=Huwe1 PE=1 SV=5;sp|Q7TMY8-4|HUWE1_MOUSE Isoform 4 of E3 ubiquitin-p	Q7TMY8-3;Q7TMY8;Q7TMY8-4;Q7TMY8-2	E3 ubiquitin-protein ligase HUWE1	Huwe1	25937	23733	24096	18681	15184	15730	7859	17737	17734		54	54	17.7
	sp|Q80W93|HYDIN_MOUSE Hydrocephalus-inducing protein OS=Mus musculus OX=10090 GN=Hydin PE=1 SV=2	Q80W93;Q80W93-2	Hydrocephalus-inducing protein	Hydin	5672	5376	6002	3577	4315	3621	0	0	4796		3	2	0.8
	sp|Q9JKR6|HYOU1_MOUSE Hypoxia up-regulated protein 1 OS=Mus musculus OX=10090 GN=Hyou1 PE=1 SV=1	Q9JKR6	Hypoxia up-regulated protein 1	Hyou1	162692	128932	168859	124004	95569	99011	128577	118776	101190		35	35	45.3
	sp|Q8BU30|SYIC_MOUSE Isoleucine--tRNA ligase, cytoplasmic OS=Mus musculus OX=10090 GN=Iars PE=1 SV=2	Q8BU30	Isoleucine--tRNA ligase, cytoplasmic	Iars	83313	76837	91429	69696	63431	65701	86238	57813	66407		50	50	48.6
	sp|Q8BIJ6|SYIM_MOUSE Isoleucine--tRNA ligase, mitochondrial OS=Mus musculus OX=10090 GN=Iars2 PE=1 SV=1	Q8BIJ6	Isoleucine--tRNA ligase, mitochondrial	Iars2	15546	11169	11485	13942	6892	13906	14351	14321	9897		15	15	19.9
	sp|P13597-2|ICAM1_MOUSE Isoform 2 of Intercellular adhesion molecule 1 OS=Mus musculus OX=10090 GN=Icam1;sp|P13597|ICAM1_MOUSE Intercellular adhesion molecule 1 OS=Mus musculus OX=10090 GN=Icam1 PE=1 SV=1	P13597-2;P13597	Intercellular adhesion molecule 1	Icam1	4813	4785	5876	8442	4666	7565	9683	11340	4462		7	7	15.8
	sp|Q9JHR7|IDE_MOUSE Insulin-degrading enzyme OS=Mus musculus OX=10090 GN=Ide PE=1 SV=1	Q9JHR7	Insulin-degrading enzyme	Ide	50440	35343	62727	45245	34663	38263	60619	43861	38524		32	32	43.8
	sp|P54071|IDHP_MOUSE Isocitrate dehydrogenase [NADP], mitochondrial OS=Mus musculus OX=10090 GN=Idh2 PE=1 SV=3	P54071	Isocitrate dehydrogenase [NADP], mitochondrial	Idh2	50756	53337	60133	75652	59914	65331	75140	44421	52245		14	14	40.5
	sp|Q9D6R2|IDH3A_MOUSE Isocitrate dehydrogenase [NAD] subunit alpha, mitochondrial OS=Mus musculus OX=10090 GN=Idh3a PE=1 SV=1;sp|Q9D6R2-2|IDH3A_MOUSE Isoform 2 of Isocitrate dehydrogenase [NAD] subunit alpha, mitochondrial OS=Mus musculus OX=10090 GN=Idh3a	Q9D6R2;Q9D6R2-2	Isocitrate dehydrogenase [NAD] subunit alpha, mitochondrial	Idh3a	117125	90826	110051	79390	76880	82455	123129	104454	98628		15	15	37.2
	tr|Q91VA7|Q91VA7_MOUSE Isocitrate dehydrogenase [NAD] subunit, mitochondrial OS=Mus musculus OX=10090 GN=Idh3b PE=1 SV=1	Q91VA7;V9GXV0	Isocitrate dehydrogenase [NAD] subunit, mitochondrial	Idh3b	144780	142326	110584	140019	65800	65276	209596	83530	86230		17	17	53.4
	sp|P70404|IDHG1_MOUSE Isocitrate dehydrogenase [NAD] subunit gamma 1, mitochondrial OS=Mus musculus OX=10090 GN=Idh3g PE=1 SV=1	P70404	Isocitrate dehydrogenase [NAD] subunit gamma 1, mitochondrial	Idh3g	46664	60050	81130	66660	52916	54116	73590	43904	51319		9	9	40.7
	sp|P58044|IDI1_MOUSE Isopentenyl-diphosphate Delta-isomerase 1 OS=Mus musculus OX=10090 GN=Idi1 PE=1 SV=1	P58044	Isopentenyl-diphosphate Delta-isomerase 1	Idi1	194178	204762	344834	160475	227067	190701	217104	162126	215498		11	11	65.6
	sp|Q9ESY9|GILT_MOUSE Gamma-interferon-inducible lysosomal thiol reductase OS=Mus musculus OX=10090 GN=Ifi30 PE=1 SV=3	Q9ESY9	Gamma-interferon-inducible lysosomal thiol reductase	Ifi30	0	3112	22895	8632	7415	15474	7000	14458	6447		3	3	27.4
	sp|Q9D8C4|IN35_MOUSE Interferon-induced 35 kDa protein homolog OS=Mus musculus OX=10090 GN=Ifi35 PE=1 SV=3	Q9D8C4	Interferon-induced 35 kDa protein homolog	Ifi35	13982	19849	4916	4310	2504	35436	12858	15415	24794		7	7	40.9
	sp|Q9D103|IFM1_MOUSE Interferon-induced transmembrane protein 1 OS=Mus musculus OX=10090 GN=Ifitm1 PE=2 SV=1	Q9D103	Interferon-induced transmembrane protein 1	Ifitm1	569896	431258	488604	644032	443105	609028	476200	387542	297054		1	1	15.1
	sp|Q99J93|IFM2_MOUSE Interferon-induced transmembrane protein 2 OS=Mus musculus OX=10090 GN=Ifitm2 PE=1 SV=1	Q99J93	Interferon-induced transmembrane protein 2	Ifitm2	209047	204864	194243	196602	122682	162211	165172	118560	128708		4	4	44.4
	sp|Q9CQW9|IFM3_MOUSE Interferon-induced transmembrane protein 3 OS=Mus musculus OX=10090 GN=Ifitm3 PE=1 SV=1	Q9CQW9	Interferon-induced transmembrane protein 3	Ifitm3	556958	666961	680653	491342	353866	373797	626170	51335	261354		5	4	48.2
	tr|Q9D8U0|Q9D8U0_MOUSE Interferon-related developmental regulator 2 OS=Mus musculus OX=10090 GN=Ifrd2 PE=1 SV=1	Q9D8U0;A0A0A6YWV7;A0A0A6YY02		Ifrd2	2242	1649	2263	4180	2204	2247	6423	2393	2409		3	3	9.1
	sp|Q61249|IGBP1_MOUSE Immunoglobulin-binding protein 1 OS=Mus musculus OX=10090 GN=Igbp1 PE=1 SV=1	Q61249	Immunoglobulin-binding protein 1	Igbp1	16940	14461	25449	10216	7959	20205	10875	19086	7040		4	4	17.1
	sp|Q9CPN8|IF2B3_MOUSE Insulin-like growth factor 2 mRNA-binding protein 3 OS=Mus musculus OX=10090 GN=Igf2bp3 PE=1 SV=1	Q9CPN8	Insulin-like growth factor 2 mRNA-binding protein 3	Igf2bp3	8583	8367	12686	3218	3244	6467	1975	1004	2597		7	6	17.4
	sp|Q07113|MPRI_MOUSE Cation-independent mannose-6-phosphate receptor OS=Mus musculus OX=10090 GN=Igf2r PE=1 SV=1	Q07113	Cation-independent mannose-6-phosphate receptor	Igf2r	12231	15495	16746	9572	8673	11931	10278	7248	8116		32	32	18.9
	sp|Q9QZ85|IIGP1_MOUSE Interferon-inducible GTPase 1 OS=Mus musculus OX=10090 GN=Iigp1 PE=1 SV=2	Q9QZ85	Interferon-inducible GTPase 1	Iigp1	172854	176770	261693	97456	125725	126916	220023	198137	241517		21	21	66.8
	sp|Q9Z1M8|RED_MOUSE Protein Red OS=Mus musculus OX=10090 GN=Ik PE=1 SV=2	Q9Z1M8	Protein Red	Ik	12278	13996	28871	10749	7958	8900	9435	7860	7209		9	9	19
	sp|Q7TT37|ELP1_MOUSE Elongator complex protein 1 OS=Mus musculus OX=10090 GN=Elp1 PE=1 SV=2	Q7TT37	Elongator complex protein 1	Ikbkap	7336	3564	8191	11328	8453	9051	5976	8430	7675		17	17	18.4
	sp|O88351|IKKB_MOUSE Inhibitor of nuclear factor kappa-B kinase subunit beta OS=Mus musculus OX=10090 GN=Ikbkb PE=1 SV=1	O88351	Inhibitor of nuclear factor kappa-B kinase subunit beta	Ikbkb	1983	2687	5760	1890	5390	3517	3298	2075	1644		8	8	13.6
	sp|O88522|NEMO_MOUSE NF-kappa-B essential modulator OS=Mus musculus OX=10090 GN=Ikbkg PE=1 SV=2	O88522	NF-kappa-B essential modulator	Ikbkg	0	0	0	2878	1250	1802	1965	2070	0		3	3	13.3
	sp|Q03267-6|IKZF1_MOUSE Isoform V of DNA-binding protein Ikaros OS=Mus musculus OX=10090 GN=Ikzf1;sp|Q03267|IKZF1_MOUSE DNA-binding protein Ikaros OS=Mus musculus OX=10090 GN=Ikzf1 PE=1 SV=2;sp|Q03267-2|IKZF1_MOUSE Isoform I of DNA-binding protein Ikaros O	Q03267-6;Q03267;Q03267-2;Q03267-3;Q03267-4;Q03267-5;P81183-2;P81183;Q8C208-3;Q8C208-2;Q8C208;Q8C208-4	DNA-binding protein Ikaros	Ikzf1	110922	48452	55604	77887	33064	67892	65783	78270	67007		7	6	19.5
	sp|O08900|IKZF3_MOUSE Zinc finger protein Aiolos OS=Mus musculus OX=10090 GN=Ikzf3 PE=1 SV=2	O08900	Zinc finger protein Aiolos	Ikzf3	2883	5608	8004	3099	12557	19923	3291	3270	4723		4	4	11
	sp|Q60837|I12R1_MOUSE Interleukin-12 receptor subunit beta-1 OS=Mus musculus OX=10090 GN=Il12rb1 PE=1 SV=2	Q60837	Interleukin-12 receptor subunit beta-1	Il12rb1	3864	2994	2414	2343	2403	3144	5584	1249	2004		5	5	8.1
	sp|O54824-2|IL16_MOUSE Isoform 2 of Pro-interleukin-16 OS=Mus musculus OX=10090 GN=Il16;sp|O54824|IL16_MOUSE Pro-interleukin-16 OS=Mus musculus OX=10090 GN=Il16 PE=1 SV=3	O54824-2;O54824	Pro-interleukin-16;Interleukin-16	Il16	40203	42124	38669	30892	50959	58178	48174	18764	35727		16	16	31.9
	sp|Q61098|IL18R_MOUSE Interleukin-18 receptor 1 OS=Mus musculus OX=10090 GN=Il18r1 PE=1 SV=1	Q61098	Interleukin-18 receptor 1	Il18r1	1164	1714	0	5154	0	0	5671	1566	2580		8	8	14.9
	sp|P01590|IL2RA_MOUSE Interleukin-2 receptor subunit alpha OS=Mus musculus OX=10090 GN=Il2ra PE=2 SV=1	P01590	Interleukin-2 receptor subunit alpha	Il2ra	59477	97936	130320	74648	50656	37168	66992	41942	82141		8	8	32.1
	sp|P16297|IL2RB_MOUSE Interleukin-2 receptor subunit beta OS=Mus musculus OX=10090 GN=Il2rb PE=1 SV=1	P16297	Interleukin-2 receptor subunit beta	Il2rb	7330	2206	8900	2785	5900	3161	2658	2797	0		3	3	7.4
	sp|P34902|IL2RG_MOUSE Cytokine receptor common subunit gamma OS=Mus musculus OX=10090 GN=Il2rg PE=1 SV=1	P34902	Cytokine receptor common subunit gamma	Il2rg	28455	9698	21454	32501	31866	38525	22743	24141	7310		6	6	20.9
	sp|Q9CXY6|ILF2_MOUSE Interleukin enhancer-binding factor 2 OS=Mus musculus OX=10090 GN=Ilf2 PE=1 SV=1	Q9CXY6	Interleukin enhancer-binding factor 2	Ilf2	104323	94978	152406	114691	98873	115389	119965	110232	100073		14	14	60
	sp|Q9Z1X4-2|ILF3_MOUSE Isoform 2 of Interleukin enhancer-binding factor 3 OS=Mus musculus OX=10090 GN=Ilf3;sp|Q9Z1X4|ILF3_MOUSE Interleukin enhancer-binding factor 3 OS=Mus musculus OX=10090 GN=Ilf3 PE=1 SV=2;sp|Q9Z1X4-3|ILF3_MOUSE Isoform 3 of Interleukin	Q9Z1X4-2;Q9Z1X4;Q9Z1X4-3	Interleukin enhancer-binding factor 3	Ilf3	39231	28564	68230	60792	27997	32890	48431	56503	44740		22	20	40.2
	sp|O55222|ILK_MOUSE Integrin-linked protein kinase OS=Mus musculus OX=10090 GN=Ilk PE=1 SV=2	O55222	Integrin-linked protein kinase	Ilk	61959	37258	45380	47094	35215	38258	45972	28189	35271		14	14	36.3
	sp|Q8R0F6|ILKAP_MOUSE Integrin-linked kinase-associated serine/threonine phosphatase 2C OS=Mus musculus OX=10090 GN=Ilkap PE=1 SV=1;sp|Q8R0F6-2|ILKAP_MOUSE Isoform 2 of Integrin-linked kinase-associated serine/threonine phosphatase 2C OS=Mus musculus OX=10	Q8R0F6;Q8R0F6-2	Integrin-linked kinase-associated serine/threonine phosphatase 2C	Ilkap	30099	0	3585	20250	6842	28158	37624	26868	14556		6	6	17.9
	sp|Q8BU33|ILVBL_MOUSE Acetolactate synthase-like protein OS=Mus musculus OX=10090 GN=Ilvbl PE=1 SV=1;sp|Q8BU33-3|ILVBL_MOUSE Isoform 3 of Acetolactate synthase-like protein OS=Mus musculus OX=10090 GN=Ilvbl;sp|Q8BU33-2|ILVBL_MOUSE Isoform 2 of Acetolactate	Q8BU33;Q8BU33-3;Q8BU33-2	Acetolactate synthase-like protein	Ilvbl	2017	2373	4700	0	0	0	0	932	1320		7	7	15.5
	sp|Q8CAQ8-2|MIC60_MOUSE Isoform 2 of MICOS complex subunit Mic60 OS=Mus musculus OX=10090 GN=Immt	Q8CAQ8-2;Q8CAQ8-4	MICOS complex subunit Mic60	Immt	88663	76197	117718	99376	99681	90976	119929	96303	94564		32	0	50.3
	sp|Q8CAQ8|MIC60_MOUSE MICOS complex subunit Mic60 OS=Mus musculus OX=10090 GN=Immt PE=1 SV=1;sp|Q8CAQ8-5|MIC60_MOUSE Isoform 5 of MICOS complex subunit Mic60 OS=Mus musculus OX=10090 GN=Immt	Q8CAQ8;Q8CAQ8-5	MICOS complex subunit Mic60	Immt	845	0	1263	0	1206	840	950	905	593		1	1	51
	sp|Q921Y2|IMP3_MOUSE U3 small nucleolar ribonucleoprotein protein IMP3 OS=Mus musculus OX=10090 GN=Imp3 PE=2 SV=1	Q921Y2	U3 small nucleolar ribonucleoprotein protein IMP3	Imp3	9103	6606	0	7986	0	3125	15833	4725	5062		3	3	25.5
	sp|Q8VHZ7|IMP4_MOUSE U3 small nucleolar ribonucleoprotein protein IMP4 OS=Mus musculus OX=10090 GN=Imp4 PE=2 SV=1	Q8VHZ7	U3 small nucleolar ribonucleoprotein protein IMP4	Imp4	21943	0	12180	10722	23916	14537	4139	8505	14946		4	4	15.8
	sp|O55023|IMPA1_MOUSE Inositol monophosphatase 1 OS=Mus musculus OX=10090 GN=Impa1 PE=1 SV=1	O55023	Inositol monophosphatase 1	Impa1	125242	90559	138347	107871	105710	109577	162121	86613	90476		10	10	34.3
	sp|Q91UZ5|IMPA2_MOUSE Inositol monophosphatase 2 OS=Mus musculus OX=10090 GN=Impa2 PE=1 SV=1	Q91UZ5	Inositol monophosphatase 2	Impa2	15768	47725	61520	50529	27769	26437	38254	30148	42810		5	5	24.8
	sp|Q80V26|IMPA3_MOUSE Inositol monophosphatase 3 OS=Mus musculus OX=10090 GN=Impad1 PE=1 SV=1	Q80V26	Inositol monophosphatase 3	Impad1	0	7934	3389	0	2659	3351	0	1084	0		2	2	11.2
	sp|P50096|IMDH1_MOUSE Inosine-5-monophosphate dehydrogenase 1 OS=Mus musculus OX=10090 GN=Impdh1 PE=1 SV=2	P50096	Inosine-5-monophosphate dehydrogenase 1	Impdh1	31099	56824	70628	46828	37989	31211	70345	42395	47314		14	14	48.8
	sp|P24547|IMDH2_MOUSE Inosine-5-monophosphate dehydrogenase 2 OS=Mus musculus OX=10090 GN=Impdh2 PE=1 SV=2	P24547	Inosine-5-monophosphate dehydrogenase 2	Impdh2	672894	616889	741811	519754	510179	570793	749741	531585	553413		27	25	56.4
	sp|Q9WU62-2|INCE_MOUSE Isoform 2 of Inner centromere protein OS=Mus musculus OX=10090 GN=Incenp;sp|Q9WU62|INCE_MOUSE Inner centromere protein OS=Mus musculus OX=10090 GN=Incenp PE=1 SV=2	Q9WU62-2;Q9WU62	Inner centromere protein	Incenp	2977	2311	2807	3857	1874	4195	870	2988	3241		4	4	5.8
	sp|P49442|INPP_MOUSE Inositol polyphosphate 1-phosphatase OS=Mus musculus OX=10090 GN=Inpp1 PE=1 SV=2	P49442	Inositol polyphosphate 1-phosphatase	Inpp1	4228	6510	3883	11461	3959	4305	3868	3013	5483		4	4	14.4
	sp|Q6P1Y8|INP4B_MOUSE Type II inositol 3,4-bisphosphate 4-phosphatase OS=Mus musculus OX=10090 GN=Inpp4b PE=2 SV=1	Q6P1Y8	Type II inositol 3,4-bisphosphate 4-phosphatase	Inpp4b	11344	8194	10452	15588	12430	8723	19182	9205	9550		13	13	22.2
	sp|Q8K337-3|I5P2_MOUSE Isoform 3 of Type II inositol 1,4,5-trisphosphate 5-phosphatase OS=Mus musculus OX=10090 GN=Inpp5b;sp|Q8K337|I5P2_MOUSE Type II inositol 1,4,5-trisphosphate 5-phosphatase OS=Mus musculus OX=10090 GN=Inpp5b PE=1 SV=1;sp|Q8K337-2|I5P2_	Q8K337-3;Q8K337;Q8K337-2	Type II inositol 1,4,5-trisphosphate 5-phosphatase	Inpp5b	5407	4916	7238	5702	6114	6168	6583	6295	5511		13	13	21
	sp|Q9ES52-2|SHIP1_MOUSE Isoform 2 of Phosphatidylinositol 3,4,5-trisphosphate 5-phosphatase 1 OS=Mus musculus OX=10090 GN=Inpp5d;sp|Q9ES52|SHIP1_MOUSE Phosphatidylinositol 3,4,5-trisphosphate 5-phosphatase 1 OS=Mus musculus OX=10090 GN=Inpp5d PE=1 SV=2;sp|	Q9ES52-2;Q9ES52;Q9ES52-3;Q9ES52-4;Q9ES52-5;Q9ES52-6;Q6P549	Phosphatidylinositol 3,4,5-trisphosphate 5-phosphatase 1	Inpp5d	45802	35009	61609	31909	42904	46545	47833	29826	30909		43	43	49.4
	sp|Q6P4S8|INT1_MOUSE Integrator complex subunit 1 OS=Mus musculus OX=10090 GN=Ints1 PE=1 SV=2	Q6P4S8	Integrator complex subunit 1	Ints1	3171	1077	1711	2281	90	1859	3238	2077	1599		14	14	9.8
	sp|Q8K2A7|INT10_MOUSE Integrator complex subunit 10 OS=Mus musculus OX=10090 GN=Ints10 PE=1 SV=3	Q8K2A7	Integrator complex subunit 10	Ints10	0	0	2686	1690	2914	3290	3639	7630	1865		7	7	13.4
	sp|Q7TPD0|INT3_MOUSE Integrator complex subunit 3 OS=Mus musculus OX=10090 GN=Ints3 PE=1 SV=2	Q7TPD0;Q7TPD0-2	Integrator complex subunit 3	Ints3	3340	4557	7179	9599	5054	2556	4202	6848	5494		18	18	26.2
	sp|Q8CIM8|INT4_MOUSE Integrator complex subunit 4 OS=Mus musculus OX=10090 GN=Ints4 PE=1 SV=1;sp|Q8CIM8-2|INT4_MOUSE Isoform 2 of Integrator complex subunit 4 OS=Mus musculus OX=10090 GN=Ints4	Q8CIM8;Q8CIM8-2;Q8CIM8-3	Integrator complex subunit 4	Ints4	4555	1466	3163	3652	2339	2593	4064	3140	1223		9	9	14.8
	sp|Q8CHT3|INT5_MOUSE Integrator complex subunit 5 OS=Mus musculus OX=10090 GN=Ints5 PE=2 SV=1	Q8CHT3	Integrator complex subunit 5	Ints5	2548	1702	5868	2861	1998	4059	6105	4654	3397		5	5	7.3
	sp|Q6PCM2|INT6_MOUSE Integrator complex subunit 6 OS=Mus musculus OX=10090 GN=Ints6 PE=1 SV=1;sp|Q6PCM2-2|INT6_MOUSE Isoform 2 of Integrator complex subunit 6 OS=Mus musculus OX=10090 GN=Ints6	Q6PCM2;Q6PCM2-2;Q6PCM2-3;Q8BND4	Integrator complex subunit 6	Ints6	4602	1135	4171	6372	4112	4103	2851	6521	4003		11	11	19.6
	sp|Q7TQK1|INT7_MOUSE Integrator complex subunit 7 OS=Mus musculus OX=10090 GN=Ints7 PE=1 SV=1;sp|Q7TQK1-2|INT7_MOUSE Isoform 2 of Integrator complex subunit 7 OS=Mus musculus OX=10090 GN=Ints7	Q7TQK1;Q7TQK1-2	Integrator complex subunit 7	Ints7	4401	3035	8637	8714	4656	5457	5568	7291	83685		12	12	19.4
	sp|Q80V86|INT8_MOUSE Integrator complex subunit 8 OS=Mus musculus OX=10090 GN=Ints8 PE=1 SV=1	Q80V86	Integrator complex subunit 8	Ints8	914	644	1684	0	414	1139	1078	1318	930		5	5	5.5
	sp|Q8K114|INT9_MOUSE Integrator complex subunit 9 OS=Mus musculus OX=10090 GN=Ints9 PE=1 SV=1;sp|Q8K114-2|INT9_MOUSE Isoform 2 of Integrator complex subunit 9 OS=Mus musculus OX=10090 GN=Ints9	Q8K114;Q8K114-2	Integrator complex subunit 9	Ints9	3612	5810	11108	6775	4992	11021	4276	6780	6949		7	7	16.4
	sp|Q8K2V6|IPO11_MOUSE Importin-11 OS=Mus musculus OX=10090 GN=Ipo11 PE=1 SV=1;sp|Q8K2V6-2|IPO11_MOUSE Isoform 2 of Importin-11 OS=Mus musculus OX=10090 GN=Ipo11	Q8K2V6;Q8K2V6-2	Importin-11	Ipo11	6331	3573	7288	6431	1943	3669	5340	3924	4588		11	11	16.7
	sp|Q8VI75|IPO4_MOUSE Importin-4 OS=Mus musculus OX=10090 GN=Ipo4 PE=1 SV=1	Q8VI75	Importin-4	Ipo4	3858	3028	7673	5987	4646	5144	11447	11214	5085		14	14	16.3
	sp|Q8BKC5|IPO5_MOUSE Importin-5 OS=Mus musculus OX=10090 GN=Ipo5 PE=1 SV=3;sp|Q8BKC5-2|IPO5_MOUSE Isoform 2 of Importin-5 OS=Mus musculus OX=10090 GN=Ipo5	Q8BKC5;Q8BKC5-2;Q8BIV3	Importin-5	Ipo5	151193	133065	174742	140327	104656	111570	161216	131066	111695		37	37	49.9
	sp|Q9EPL8|IPO7_MOUSE Importin-7 OS=Mus musculus OX=10090 GN=Ipo7 PE=1 SV=2	Q9EPL8	Importin-7	Ipo7	55196	57047	71797	42034	22728	42303	55617	40329	43433		29	29	33.5
	sp|Q7TMY7-2|IPO8_MOUSE Isoform 2 of Importin-8 OS=Mus musculus OX=10090 GN=Ipo8;sp|Q7TMY7|IPO8_MOUSE Importin-8 OS=Mus musculus OX=10090 GN=Ipo8 PE=1 SV=3	Q7TMY7-2;Q7TMY7	Importin-8	Ipo8	0	209	5250	215	133	0	3082	0	607		5	5	7.3
	sp|Q91YE6|IPO9_MOUSE Importin-9 OS=Mus musculus OX=10090 GN=Ipo9 PE=1 SV=3	Q91YE6	Importin-9	Ipo9	6263	4356	3447	11050	6188	6523	4486	8896	3881		9	9	11.6
	sp|Q9JKF1|IQGA1_MOUSE Ras GTPase-activating-like protein IQGAP1 OS=Mus musculus OX=10090 GN=Iqgap1 PE=1 SV=2	Q9JKF1;Q3UQP1;F8VQ29	Ras GTPase-activating-like protein IQGAP1	Iqgap1	132690	130846	181245	150453	132911	130622	151101	114065	135842		80	77	65.5
	sp|Q3UQ44|IQGA2_MOUSE Ras GTPase-activating-like protein IQGAP2 OS=Mus musculus OX=10090 GN=Iqgap2 PE=1 SV=2	Q3UQ44	Ras GTPase-activating-like protein IQGAP2	Iqgap2	27181	24381	37127	40818	30559	25744	36636	29525	25369		46	46	40.4
	sp|E9Q1P8|I2BP2_MOUSE Interferon regulatory factor 2-binding protein 2 OS=Mus musculus OX=10090 GN=Irf2bp2 PE=1 SV=1	E9Q1P8	Interferon regulatory factor 2-binding protein 2	Irf2bp2	9254	17112	14267	21616	22698	17738	13550	10024	16098		11	9	31.9
	sp|Q8K3X4|I2BPL_MOUSE Probable E3 ubiquitin-protein ligase IRF2BPL OS=Mus musculus OX=10090 GN=Irf2bpl PE=1 SV=1	Q8K3X4	Interferon regulatory factor 2-binding protein-like	Irf2bpl	0	0	0	0	1165	6487	1351	1945	0		6	6	13.7
	sp|P70671|IRF3_MOUSE Interferon regulatory factor 3 OS=Mus musculus OX=10090 GN=Irf3 PE=1 SV=1	P70671	Interferon regulatory factor 3	Irf3	0	5401	4799	1851	1525	1215	3976	2376	2976		4	4	12.4
	sp|Q64287-2|IRF4_MOUSE Isoform 2 of Interferon regulatory factor 4 OS=Mus musculus OX=10090 GN=Irf4;sp|Q64287|IRF4_MOUSE Interferon regulatory factor 4 OS=Mus musculus OX=10090 GN=Irf4 PE=1 SV=1	Q64287-2;Q64287	Interferon regulatory factor 4	Irf4	4299	5072	8251	9918	5570	8220	9357	9376	15892		7	7	25.4
	sp|P23611|IRF8_MOUSE Interferon regulatory factor 8 OS=Mus musculus OX=10090 GN=Irf8 PE=1 SV=1	P23611	Interferon regulatory factor 8	Irf8	2338	2236	4616	1446	0	0	2396	2074	3654		3	3	11.8
	sp|Q61179|IRF9_MOUSE Interferon regulatory factor 9 OS=Mus musculus OX=10090 GN=Irf9 PE=1 SV=1	Q61179	Interferon regulatory factor 9	Irf9	0	0	0	0	2624	2840	7617	0	2520		2	2	8
	sp|Q60766|IRGM1_MOUSE Immunity-related GTPase family M protein 1 OS=Mus musculus OX=10090 GN=Irgm1 PE=1 SV=1	Q60766	Immunity-related GTPase family M protein 1	Irgm1	2409	3344	6748	3674	0	1882	2512	2993	4960		1	1	38.4
	sp|Q60766-2|IRGM1_MOUSE Isoform 2 of Immunity-related GTPase family M protein 1 OS=Mus musculus OX=10090 GN=Irgm1	Q60766-2	Immunity-related GTPase family M protein 1	Irgm1	80059	96533	64367	24530	30848	34630	80319	75009	35825		11	1	36.1
	sp|Q9JL16-2|ISG20_MOUSE Isoform 2 of Interferon-stimulated gene 20 kDa protein OS=Mus musculus OX=10090 GN=Isg20;sp|Q9JL16|ISG20_MOUSE Interferon-stimulated gene 20 kDa protein OS=Mus musculus OX=10090 GN=Isg20 PE=1 SV=1	Q9JL16-2;Q9JL16	Interferon-stimulated gene 20 kDa protein	Isg20	10882	53261	34592	10117	13631	31750	61073	14513	8472		4	4	23.2
	sp|Q3U1G5|I20L2_MOUSE Interferon-stimulated 20 kDa exonuclease-like 2 OS=Mus musculus OX=10090 GN=Isg20l2 PE=1 SV=2	Q3U1G5	Interferon-stimulated 20 kDa exonuclease-like 2	Isg20l2	10331	0	3090	7720	7048	7507	7294	4909	2274		5	5	18.5
	sp|Q91V64|ISOC1_MOUSE Isochorismatase domain-containing protein 1 OS=Mus musculus OX=10090 GN=Isoc1 PE=1 SV=1	Q91V64	Isochorismatase domain-containing protein 1	Isoc1	62549	40655	59573	47121	52495	51522	70813	44574	41336		7	7	25.9
	sp|P85094|ISC2A_MOUSE Isochorismatase domain-containing protein 2A OS=Mus musculus OX=10090 GN=Isoc2a PE=1 SV=1	P85094	Isochorismatase domain-containing protein 2A, mitochondrial	Isoc2a	3562	5754	4476	3692	2138	3012	5741	5139	4865		1	1	16
	sp|Q9CX00|IST1_MOUSE IST1 homolog OS=Mus musculus OX=10090 GN=Ist1 PE=1 SV=1	Q9CX00	IST1 homolog	Ist1	3535	10371	0	16659	9814	10240	11386	0	16085		6	6	24.6
	sp|Q69ZQ2|ISY1_MOUSE Pre-mRNA-splicing factor ISY1 homolog OS=Mus musculus OX=10090 GN=Isy1 PE=1 SV=2	Q69ZQ2	Pre-mRNA-splicing factor ISY1 homolog	Isy1	0	16514	18456	3869	18048	16564	0	11652	7775		4	4	21.4
	sp|Q9JHU9|INO1_MOUSE Inositol-3-phosphate synthase 1 OS=Mus musculus OX=10090 GN=Isyna1 PE=1 SV=1	Q9JHU9	Inositol-3-phosphate synthase 1	Isyna1	63621	41857	65908	44512	41995	31705	71344	58552	37879		15	15	41.1
	sp|Q8C863|ITCH_MOUSE E3 ubiquitin-protein ligase Itchy OS=Mus musculus OX=10090 GN=Itch PE=1 SV=2;sp|Q8C863-2|ITCH_MOUSE Isoform 2 of E3 ubiquitin-protein ligase Itchy OS=Mus musculus OX=10090 GN=Itch	Q8C863;Q8C863-2;Q8BZZ3;Q9DBH0	E3 ubiquitin-protein ligase Itchy	Itch	688	4489	480	3844	165	0	411	3516	0		6	6	10.1
	sp|Q61739-2|ITA6_MOUSE Isoform Alpha-6X1A of Integrin alpha-6 OS=Mus musculus OX=10090 GN=Itga6;sp|Q61739|ITA6_MOUSE Integrin alpha-6 OS=Mus musculus OX=10090 GN=Itga6 PE=1 SV=3	Q61739-2;Q61739	Integrin alpha-6;Integrin alpha-6 heavy chain;Integrin alpha-6 light chain	Itga6	267	306	252	1055	299	1383	355	0	5496		3	3	3.2
	sp|P24063|ITAL_MOUSE Integrin alpha-L OS=Mus musculus OX=10090 GN=Itgal PE=1 SV=2	P24063	Integrin alpha-L	Itgal	181676	198393	203800	178871	150212	152128	197442	159539	152352		39	39	43.1
	sp|P09055|ITB1_MOUSE Integrin beta-1 OS=Mus musculus OX=10090 GN=Itgb1 PE=1 SV=1;sp|P09055-2|ITB1_MOUSE Isoform 2 of Integrin beta-1 OS=Mus musculus OX=10090 GN=Itgb1	P09055;P09055-2	Integrin beta-1	Itgb1	106210	93886	133956	100490	84928	70477	108790	105114	92512		22	22	35.7
	sp|P11835|ITB2_MOUSE Integrin beta-2 OS=Mus musculus OX=10090 GN=Itgb2 PE=1 SV=2	P11835	Integrin beta-2	Itgb2	213637	241907	269699	205276	225932	202143	216543	230235	200429		32	32	50.1
	sp|Q9Z0T9|ITB6_MOUSE Integrin beta-6 OS=Mus musculus OX=10090 GN=Itgb6 PE=1 SV=1	Q9Z0T9	Integrin beta-6	Itgb6	16696	0	16553	12800	10640	12432	17505	0	11613		1	1	1.1
	sp|P26011|ITB7_MOUSE Integrin beta-7 OS=Mus musculus OX=10090 GN=Itgb7 PE=1 SV=2	P26011	Integrin beta-7	Itgb7	19634	19457	21302	27299	14082	11793	12718	13512	16190		10	10	16.7
	sp|Q03526|ITK_MOUSE Tyrosine-protein kinase ITK/TSK OS=Mus musculus OX=10090 GN=Itk PE=1 SV=1	Q03526	Tyrosine-protein kinase ITK/TSK	Itk	2247	23359	4355	11334	2262	2145	2060	3936	14257		6	6	11.2
	sp|O89051|ITM2B_MOUSE Integral membrane protein 2B OS=Mus musculus OX=10090 GN=Itm2b PE=1 SV=1	O89051	Integral membrane protein 2B;BRI2, membrane form;BRI2 intracellular domain;BRI2C, soluble form;Bri23 peptide	Itm2b	50713	42890	43836	57511	29837	49799	16849	26706	12355		8	8	37.6
	sp|Q9D892|ITPA_MOUSE Inosine triphosphate pyrophosphatase OS=Mus musculus OX=10090 GN=Itpa PE=1 SV=2	Q9D892	Inosine triphosphate pyrophosphatase	Itpa	27586	51604	83594	69900	37755	78353	83679	47215	53075		7	7	52.5
	sp|P11881-8|ITPR1_MOUSE Isoform 8 of Inositol 1,4,5-trisphosphate receptor type 1 OS=Mus musculus OX=10090 GN=Itpr1;sp|P11881-7|ITPR1_MOUSE Isoform 7 of Inositol 1,4,5-trisphosphate receptor type 1 OS=Mus musculus OX=10090 GN=Itpr1;sp|P11881-6|ITPR1_MOUSE	P11881-8;P11881-7;P11881-6;P11881-5;P11881-4;P11881-2;P11881-3;P11881	Inositol 1,4,5-trisphosphate receptor type 1	Itpr1	0	0	319	773	659	0	263	530	139		2	2	1.6
	sp|Q9Z329|ITPR2_MOUSE Inositol 1,4,5-trisphosphate receptor type 2 OS=Mus musculus OX=10090 GN=Itpr2 PE=1 SV=4;sp|Q9Z329-3|ITPR2_MOUSE Isoform 3 of Inositol 1,4,5-trisphosphate receptor type 2 OS=Mus musculus OX=10090 GN=Itpr2;sp|Q9Z329-2|ITPR2_MOUSE Isofo	Q9Z329;Q9Z329-3;Q9Z329-2	Inositol 1,4,5-trisphosphate receptor type 2	Itpr2	332	0	896	465	754	529	894	399	510		6	6	5
	sp|P70227|ITPR3_MOUSE Inositol 1,4,5-trisphosphate receptor type 3 OS=Mus musculus OX=10090 GN=Itpr3 PE=1 SV=3	P70227	Inositol 1,4,5-trisphosphate receptor type 3	Itpr3	1759	1106	1834	2370	2623	2139	3121	1647	864		16	12	7.7
	sp|Q9Z0R6-2|ITSN2_MOUSE Isoform 2 of Intersectin-2 OS=Mus musculus OX=10090 GN=Itsn2;sp|Q9Z0R6|ITSN2_MOUSE Intersectin-2 OS=Mus musculus OX=10090 GN=Itsn2 PE=1 SV=2	Q9Z0R6-2;Q9Z0R6	Intersectin-2	Itsn2	4947	1377	6873	2128	4449	5188	7033	892	2361		15	15	16.9
	sp|Q9JHI5|IVD_MOUSE Isovaleryl-CoA dehydrogenase, mitochondrial OS=Mus musculus OX=10090 GN=Ivd PE=1 SV=1	Q9JHI5	Isovaleryl-CoA dehydrogenase, mitochondrial	Ivd	2364	13013	22041	2664	0	13027	14103	2184	9296		5	5	13.7
	sp|Q920Q8|NS1BP_MOUSE Influenza virus NS1A-binding protein homolog OS=Mus musculus OX=10090 GN=Ivns1abp PE=1 SV=2;sp|Q920Q8-2|NS1BP_MOUSE Isoform 2 of Influenza virus NS1A-binding protein homolog OS=Mus musculus OX=10090 GN=Ivns1abp;sp|Q920Q8-4|NS1BP_MOUSE	Q920Q8;Q920Q8-2;Q920Q8-4;Q920Q8-3	Influenza virus NS1A-binding protein homolog	Ivns1abp	3975	4063	5509	1959	0	0	3466	917	2990		5	5	12.8
	sp|Q8C1D8|IWS1_MOUSE Protein IWS1 homolog OS=Mus musculus OX=10090 GN=Iws1 PE=1 SV=1	Q8C1D8;Q8C1D8-2	Protein IWS1 homolog	Iws1	9724	8618	4543	2492	5892	7471	12258	7343	7728		6	6	10.4
	sp|Q5XKN4|JAGN1_MOUSE Protein jagunal homolog 1 OS=Mus musculus OX=10090 GN=Jagn1 PE=1 SV=2	Q5XKN4	Protein jagunal homolog 1	Jagn1	13250	10144	0	10634	7997	9705	13464	12280	9427		1	1	6.6
	sp|P52332|JAK1_MOUSE Tyrosine-protein kinase JAK1 OS=Mus musculus OX=10090 GN=Jak1 PE=1 SV=1	P52332	Tyrosine-protein kinase JAK1	Jak1	7712	5610	8213	10429	4585	8993	6289	4535	4618		18	18	20.3
	sp|Q62137|JAK3_MOUSE Tyrosine-protein kinase JAK3 OS=Mus musculus OX=10090 GN=Jak3 PE=1 SV=2;sp|Q62137-2|JAK3_MOUSE Isoform 2 of Tyrosine-protein kinase JAK3 OS=Mus musculus OX=10090 GN=Jak3	Q62137;Q62137-2	Tyrosine-protein kinase JAK3	Jak3	817	275	1005	2452	1558	1131	2083	1003	437		7	7	8.2
	sp|Q9ERI5-2|JMJD6_MOUSE Isoform 2 of Bifunctional arginine demethylase and lysyl-hydroxylase JMJD6 OS=Mus musculus OX=10090 GN=Jmjd6;sp|Q9ERI5|JMJD6_MOUSE Bifunctional arginine demethylase and lysyl-hydroxylase JMJD6 OS=Mus musculus OX=10090 GN=Jmjd6 PE=1	Q9ERI5-2;Q9ERI5	Bifunctional arginine demethylase and lysyl-hydroxylase JMJD6	Jmjd6	7005	7052	4838	0	0	3333	7787	3619	2928		3	3	18.8
	sp|P15066|JUND_MOUSE Transcription factor jun-D OS=Mus musculus OX=10090 GN=Jund PE=1 SV=1	P15066	Transcription factor jun-D	Jund	19965	15028	13593	21844	16884	17394	17286	15945	16822		4	4	22.9
	sp|Q99MN1|SYK_MOUSE Lysine--tRNA ligase OS=Mus musculus OX=10090 GN=Kars PE=1 SV=1	Q99MN1	Lysine--tRNA ligase	Kars	211736	268583	271328	165451	155950	172151	187027	123458	225952		33	33	62.4
	sp|Q5SVQ0-4|KAT7_MOUSE Isoform 4 of Histone acetyltransferase KAT7 OS=Mus musculus OX=10090 GN=Kat7;sp|Q5SVQ0-2|KAT7_MOUSE Isoform 2 of Histone acetyltransferase KAT7 OS=Mus musculus OX=10090 GN=Kat7;sp|Q5SVQ0-3|KAT7_MOUSE Isoform 3 of Histone acetyltransf	Q5SVQ0-4;Q5SVQ0-2;Q5SVQ0-3;Q5SVQ0;Q5SVQ0-5	Histone acetyltransferase KAT7	Kat7	3815	2893	5330	9091	4650	0	9443	6526	0		9	9	19.4
	sp|Q9WV86|KTNA1_MOUSE Katanin p60 ATPase-containing subunit A1 OS=Mus musculus OX=10090 GN=Katna1 PE=1 SV=1	Q9WV86	Katanin p60 ATPase-containing subunit A1	Katna1	1743	0	0	1720	1316	1728	1991	1462	0		1	1	2.4
	sp|Q8BNW9|KBTBB_MOUSE Kelch repeat and BTB domain-containing protein 11 OS=Mus musculus OX=10090 GN=Kbtbd11 PE=1 SV=3	Q8BNW9	Kelch repeat and BTB domain-containing protein 11	Kbtbd11	25748	20973	25232	32222	11536	24550	27368	19201	27565		18	18	38.2
	sp|Q80UY2|KCMF1_MOUSE E3 ubiquitin-protein ligase KCMF1 OS=Mus musculus OX=10090 GN=Kcmf1 PE=1 SV=1	Q80UY2	E3 ubiquitin-protein ligase KCMF1	Kcmf1	0	2918	0	2462	0	3444	5730	2887	0		1	1	2.9
	sp|P62482|KCAB2_MOUSE Voltage-gated potassium channel subunit beta-2 OS=Mus musculus OX=10090 GN=Kcnab2 PE=1 SV=1	P62482	Voltage-gated potassium channel subunit beta-2	Kcnab2	151059	125012	239567	236388	182578	175472	214442	177211	167810		12	10	46
	sp|Q6WVG3|KCD12_MOUSE BTB/POZ domain-containing protein KCTD12 OS=Mus musculus OX=10090 GN=Kctd12 PE=1 SV=1	Q6WVG3	BTB/POZ domain-containing protein KCTD12	Kctd12	0	1110	2151	1204	1995	0	1830	1789	0		1	1	3.1
	sp|Q6ZQ88|KDM1A_MOUSE Lysine-specific histone demethylase 1A OS=Mus musculus OX=10090 GN=Kdm1a PE=1 SV=2	Q6ZQ88	Lysine-specific histone demethylase 1A	Kdm1a	5424	1399	1644	3739	2402	1516	5342	1940	3168		13	13	22.7
	sp|P59997|KDM2A_MOUSE Lysine-specific demethylase 2A OS=Mus musculus OX=10090 GN=Kdm2a PE=1 SV=2	P59997;Q6P1G2-2	Lysine-specific demethylase 2A	Kdm2a	4685	3344	930	3083	0	2268	3304	2371	3539		10	9	12.8
	sp|Q6PCM1|KDM3A_MOUSE Lysine-specific demethylase 3A OS=Mus musculus OX=10090 GN=Kdm3a PE=1 SV=1;sp|Q6PCM1-2|KDM3A_MOUSE Isoform 2 of Lysine-specific demethylase 3A OS=Mus musculus OX=10090 GN=Kdm3a	Q6PCM1;Q6PCM1-2	Lysine-specific demethylase 3A	Kdm3a	1616	0	1596	1175	1524	1683	1246	1100	1929		8	8	8.6
	sp|Q6ZPY7|KDM3B_MOUSE Lysine-specific demethylase 3B OS=Mus musculus OX=10090 GN=Kdm3b PE=1 SV=2;sp|Q6ZPY7-2|KDM3B_MOUSE Isoform 2 of Lysine-specific demethylase 3B OS=Mus musculus OX=10090 GN=Kdm3b	Q6ZPY7;Q6ZPY7-2	Lysine-specific demethylase 3B	Kdm3b	647	569	263	0	466	381	0	225	909		8	8	9.3
	sp|Q3UXZ9|KDM5A_MOUSE Lysine-specific demethylase 5A OS=Mus musculus OX=10090 GN=Kdm5a PE=1 SV=2	Q3UXZ9	Lysine-specific demethylase 5A	Kdm5a	174	844	637	238	298	373	0	278	191		3	2	3.2
	sp|Q9Z2X8|KEAP1_MOUSE Kelch-like ECH-associated protein 1 OS=Mus musculus OX=10090 GN=Keap1 PE=1 SV=1	Q9Z2X8	Kelch-like ECH-associated protein 1	Keap1	3110	3136	0	0	3364	0	4188	1254	0		6	6	11.4
	sp|Q60749|KHDR1_MOUSE KH domain-containing, RNA-binding, signal transduction-associated protein 1 OS=Mus musculus OX=10090 GN=Khdrbs1 PE=1 SV=2	Q60749;Q9WU01-2;Q9R226;Q9WU01	KH domain-containing, RNA-binding, signal transduction-associated protein 1	Khdrbs1	133040	111391	179227	208602	179944	180504	135182	176793	129360		7	7	22.8
	sp|Q3U0V1|FUBP2_MOUSE Far upstream element-binding protein 2 OS=Mus musculus OX=10090 GN=Khsrp PE=1 SV=2	Q3U0V1	Far upstream element-binding protein 2	Khsrp	108201	113885	143453	91656	106161	170104	147632	165104	107909		24	23	43.9
	sp|Q8BKS9|PUM3_MOUSE Pumilio homolog 3 OS=Mus musculus OX=10090 GN=Pum3 PE=1 SV=2	Q8BKS9	Pumilio domain-containing protein KIAA0020	Kiaa0020	39610	24171	32581	23528	22359	25288	22214	26463	23276		19	19	37.9
	sp|Q8C2E7|WASC5_MOUSE WASH complex subunit 5 OS=Mus musculus OX=10090 GN=Washc5 PE=1 SV=2;sp|Q8C2E7-2|WASC5_MOUSE Isoform 2 of WASH complex subunit 5 OS=Mus musculus OX=10090 GN=Washc5	Q8C2E7;Q8C2E7-2	WASH complex subunit strumpellin	Kiaa0196	11109	6079	1223	1518	3454	950	10296	676	6524		12	12	11.5
	sp|Q3UMB9|WASC4_MOUSE WASH complex subunit 4 OS=Mus musculus OX=10090 GN=Washc4 PE=1 SV=2	Q3UMB9	WASH complex subunit 7	Kiaa1033	419	565	946	387	0	1047	518	367	0		5	5	4
	sp|A2AIV2|VIR_MOUSE Protein virilizer homolog OS=Mus musculus OX=10090 GN=Virma PE=1 SV=1;sp|A2AIV2-2|VIR_MOUSE Isoform 2 of Protein virilizer homolog OS=Mus musculus OX=10090 GN=Virma	A2AIV2;A2AIV2-2	Protein virilizer homolog	Kiaa1429	572	1776	3903	2239	1506	1864	3419	2970	979		10	10	8
	sp|Q8BWY9|CIP2A_MOUSE Protein CIP2A OS=Mus musculus OX=10090 GN=Cip2a PE=1 SV=3	Q8BWY9	Protein CIP2A	Kiaa1524	2074	1665	8731	6535	3100	7025	3086	3172	5296		14	14	20.4
	sp|Q6P9P6|KIF11_MOUSE Kinesin-like protein KIF11 OS=Mus musculus OX=10090 GN=Kif11 PE=1 SV=1	Q6P9P6	Kinesin-like protein KIF11	Kif11	8122	7102	15701	17406	17908	15789	14363	16575	14378		22	22	28.5
	sp|Q6P9L6|KIF15_MOUSE Kinesin-like protein KIF15 OS=Mus musculus OX=10090 GN=Kif15 PE=1 SV=1	Q6P9L6	Kinesin-like protein KIF15	Kif15	10070	12834	21977	14955	19752	11886	14999	14072	13082		35	35	33.2
	sp|P97329|KI20A_MOUSE Kinesin-like protein KIF20A OS=Mus musculus OX=10090 GN=Kif20a PE=1 SV=1	P97329	Kinesin-like protein KIF20A	Kif20a	4256	2799	4965	6472	5676	6416	7150	3364	4577		10	10	15.6
	sp|Q9QXL1|KI21B_MOUSE Kinesin-like protein KIF21B OS=Mus musculus OX=10090 GN=Kif21b PE=1 SV=2	Q9QXL1	Kinesin-like protein KIF21B	Kif21b	0	355	249	3826	227	169	0	3307	0		6	6	4.7
	sp|Q3V300|KIF22_MOUSE Kinesin-like protein KIF22 OS=Mus musculus OX=10090 GN=Kif22 PE=2 SV=2	Q3V300	Kinesin-like protein KIF22	Kif22	3412	3857	3269	7788	6203	7751	3585	3245	5318		11	11	27.1
	sp|E9Q5G3|KIF23_MOUSE Kinesin-like protein KIF23 OS=Mus musculus OX=10090 GN=Kif23 PE=1 SV=1	E9Q5G3	Kinesin-like protein KIF23	Kif23	2283	466	0	3637	0	2124	1245	1817	0		8	8	11.5
	sp|P28740-2|KIF2A_MOUSE Isoform 2 of Kinesin-like protein KIF2A OS=Mus musculus OX=10090 GN=Kif2a	P28740-2	Kinesin-like protein KIF2A	Kif2a	13596	11238	24018	14809	21106	13224	26644	10271	22336		10	1	17.3
	sp|Q922S8|KIF2C_MOUSE Kinesin-like protein KIF2C OS=Mus musculus OX=10090 GN=Kif2c PE=1 SV=1	Q922S8	Kinesin-like protein KIF2C	Kif2c	5395	6966	3529	21283	7145	8183	11838	17319	11665		9	9	15.7
	sp|P33174|KIF4_MOUSE Chromosome-associated kinesin KIF4 OS=Mus musculus OX=10090 GN=Kif4 PE=1 SV=3	P33174;P28741	Chromosome-associated kinesin KIF4	Kif4	3873	9404	6571	8720	9643	12746	10284	8918	8807		21	20	22.3
	sp|Q61768|KINH_MOUSE Kinesin-1 heavy chain OS=Mus musculus OX=10090 GN=Kif5b PE=1 SV=3	Q61768;P28738	Kinesin-1 heavy chain	Kif5b	30596	25760	36241	28258	22183	20292	35075	19465	26944		27	22	36.9
	sp|Q9QWT9-3|KIFC1_MOUSE Isoform 3 of Kinesin-like protein KIFC1 OS=Mus musculus OX=10090 GN=Kifc1;sp|Q9QWT9-2|KIFC1_MOUSE Isoform 2 of Kinesin-like protein KIFC1 OS=Mus musculus OX=10090 GN=Kifc1;sp|Q9QWT9|KIFC1_MOUSE Kinesin-like protein KIFC1 OS=Mus musc	Q9QWT9-3;Q9QWT9-2;Q9QWT9	Kinesin-like protein KIFC1	Kifc1	13153	6553	13752	15795	10438	12319	17997	12881	7375		10	10	26.4
	sp|O88447|KLC1_MOUSE Kinesin light chain 1 OS=Mus musculus OX=10090 GN=Klc1 PE=1 SV=3	O88447;Q91W40	Kinesin light chain 1	Klc1	10888	7628	11012	14480	9422	6555	8878	7378	10926		11	7	26.6
	sp|Q9JJZ6|KLF13_MOUSE Krueppel-like factor 13 OS=Mus musculus OX=10090 GN=Klf13 PE=1 SV=2	Q9JJZ6	Krueppel-like factor 13	Klf13	4685	0	0	4474	0	3525	3519	5125	0		2	2	6.2
	sp|Q921I2|KLDC4_MOUSE Kelch domain-containing protein 4 OS=Mus musculus OX=10090 GN=Klhdc4 PE=2 SV=2	Q921I2	Kelch domain-containing protein 4	Klhdc4	34355	42840	11447	6631	9070	9522	31309	9178	5687		14	14	29.8
	sp|Q8R2P1|KLH25_MOUSE Kelch-like protein 25 OS=Mus musculus OX=10090 GN=Klhl25 PE=2 SV=1	Q8R2P1	Kelch-like protein 25	Klhl25	794	1277	0	0	1094	1232	0	845	812		3	3	5.1
	sp|Q8C3Y4|KNTC1_MOUSE Kinetochore-associated protein 1 OS=Mus musculus OX=10090 GN=Kntc1 PE=1 SV=2	Q8C3Y4	Kinetochore-associated protein 1	Kntc1	586	0	2635	3130	1947	1576	1949	907	886		21	21	10.9
	sp|Q60960|IMA5_MOUSE Importin subunit alpha-5 OS=Mus musculus OX=10090 GN=Kpna1 PE=1 SV=2	Q60960	Importin subunit alpha-5;Importin subunit alpha-5, N-terminally processed	Kpna1	16671	17135	12475	19178	19963	14284	25240	22626	17190		8	5	22.1
	sp|P52293|IMA1_MOUSE Importin subunit alpha-1 OS=Mus musculus OX=10090 GN=Kpna2 PE=1 SV=2	P52293	Importin subunit alpha-1	Kpna2	127036	128491	169389	113066	120660	114102	152104	120372	134130		19	19	52.2
	sp|O35344|IMA4_MOUSE Importin subunit alpha-4 OS=Mus musculus OX=10090 GN=Kpna3 PE=1 SV=1	O35344	Importin subunit alpha-4	Kpna3	76966	80031	103576	70506	71493	61841	55201	79338	62103		13	7	38.8
	sp|O35343|IMA3_MOUSE Importin subunit alpha-3 OS=Mus musculus OX=10090 GN=Kpna4 PE=1 SV=1	O35343	Importin subunit alpha-3	Kpna4	11043	13441	9706	11470	3322	6154	3256	10455	2100		4	4	25.7
	sp|O35345|IMA7_MOUSE Importin subunit alpha-7 OS=Mus musculus OX=10090 GN=Kpna6 PE=1 SV=2	O35345	Importin subunit alpha-7	Kpna6	2554	7346	8124	1481	1043	0	0	11680	2398		5	5	20.1
	sp|P70168|IMB1_MOUSE Importin subunit beta-1 OS=Mus musculus OX=10090 GN=Kpnb1 PE=1 SV=2	P70168	Importin subunit beta-1	Kpnb1	192731	206274	282664	201349	176402	188206	253755	197831	192701		42	42	57.4
	sp|P32883-2|RASK_MOUSE Isoform 2B of GTPase KRas OS=Mus musculus OX=10090 GN=Kras;sp|P32883|RASK_MOUSE GTPase KRas OS=Mus musculus OX=10090 GN=Kras PE=1 SV=1	P32883-2;P32883	GTPase KRas;GTPase KRas, N-terminally processed	Kras	6394	0	5758	5094	3131	4513	0	5406	8877		2	1	41
	sp|Q8VDQ9|KRI1_MOUSE Protein KRI1 homolog OS=Mus musculus OX=10090 GN=Kri1 PE=1 SV=3	Q8VDQ9	Protein KRI1 homolog	Kri1	1767	2082	2546	2231	2843	2428	3627	0	4948		5	5	9.8
	sp|Q8BGA5|KRR1_MOUSE KRR1 small subunit processome component homolog OS=Mus musculus OX=10090 GN=Krr1 PE=2 SV=1	Q8BGA5	KRR1 small subunit processome component homolog	Krr1	50532	39772	50359	38059	43543	43106	28796	47562	34002		7	7	20
	sp|Q5RL79|KTAP2_MOUSE Keratinocyte-associated protein 2 OS=Mus musculus OX=10090 GN=Krtcap2 PE=1 SV=2	Q5RL79	Keratinocyte-associated protein 2	Krtcap2	28444	16302	9531	21144	9455	14168	23483	18600	9583		1	1	12.5
	sp|Q61595-2|KTN1_MOUSE Isoform 2 of Kinectin OS=Mus musculus OX=10090 GN=Ktn1;sp|Q61595-12|KTN1_MOUSE Isoform 12 of Kinectin OS=Mus musculus OX=10090 GN=Ktn1;sp|Q61595-16|KTN1_MOUSE Isoform 16 of Kinectin OS=Mus musculus OX=10090 GN=Ktn1;sp|Q61595-3|KTN1_M	Q61595-2;Q61595-12;Q61595-16;Q61595-3;Q61595-14;Q61595-6;Q61595-4;Q61595-9;Q61595-8;Q61595-13;Q61595-5;Q61595-15;Q61595-10;Q61595-7;Q61595-11;Q61595	Kinectin	Ktn1	4035	3399	2516	1891	1676	1799	2086	3480	3134		8	8	7.9
	sp|Q99KR3|LACB2_MOUSE Endoribonuclease LACTB2 OS=Mus musculus OX=10090 GN=Lactb2 PE=1 SV=1	Q99KR3	Beta-lactamase-like protein 2	Lactb2	11181	5563	12930	7242	2847	7551	8108	8892	8970		2	2	12.5
	sp|Q61790|LAG3_MOUSE Lymphocyte activation gene 3 protein OS=Mus musculus OX=10090 GN=Lag3 PE=1 SV=1	Q61790	Lymphocyte activation gene 3 protein	Lag3	0	0	0	3317	4302	1485	3405	4481	6960		5	5	15
	sp|P17047-3|LAMP2_MOUSE Isoform LAMP-2C of Lysosome-associated membrane glycoprotein 2 OS=Mus musculus OX=10090 GN=Lamp2;sp|P17047|LAMP2_MOUSE Lysosome-associated membrane glycoprotein 2 OS=Mus musculus OX=10090 GN=Lamp2 PE=1 SV=2;sp|P17047-2|LAMP2_MOUSE I	P17047-3;P17047;P17047-2	Lysosome-associated membrane glycoprotein 2	Lamp2	8869	8865	9096	9965	10510	9725	10202	8102	7120		2	2	4.1
	sp|Q9CQ22|LTOR1_MOUSE Ragulator complex protein LAMTOR1 OS=Mus musculus OX=10090 GN=Lamtor1 PE=1 SV=1	Q9CQ22	Ragulator complex protein LAMTOR1	Lamtor1	9315	13641	13663	22338	5800	28547	18316	14618	17102		3	3	34.8
	sp|O88653|LTOR3_MOUSE Ragulator complex protein LAMTOR3 OS=Mus musculus OX=10090 GN=Lamtor3 PE=1 SV=1	O88653	Ragulator complex protein LAMTOR3	Lamtor3	41271	435956	578023	430973	344490	73710	18012	396059	60517		4	4	55.6
	sp|O89112|LANC1_MOUSE Glutathione S-transferase LANCL1 OS=Mus musculus OX=10090 GN=Lancl1 PE=1 SV=1	O89112	LanC-like protein 1	Lancl1	3929	0	0	6542	0	7677	3582	12892	4487		4	4	13.3
	sp|Q9JJK2|LANC2_MOUSE LanC-like protein 2 OS=Mus musculus OX=10090 GN=Lancl2 PE=1 SV=1	Q9JJK2	LanC-like protein 2	Lancl2	978	2359	2221	6168	3174	6037	8791	910	5000		6	6	16.4
	sp|Q9CPY7|AMPL_MOUSE Cytosol aminopeptidase OS=Mus musculus OX=10090 GN=Lap3 PE=1 SV=3;sp|Q9CPY7-2|AMPL_MOUSE Isoform 2 of Cytosol aminopeptidase OS=Mus musculus OX=10090 GN=Lap3	Q9CPY7;Q9CPY7-2	Cytosol aminopeptidase	Lap3	119610	95485	161451	119397	79861	110590	135174	100349	103275		25	25	61.7
	sp|Q61168|LAPM5_MOUSE Lysosomal-associated transmembrane protein 5 OS=Mus musculus OX=10090 GN=Laptm5 PE=1 SV=1	Q61168	Lysosomal-associated transmembrane protein 5	Laptm5	0	3487	0	11834	8734	14031	5316	8888	7407		2	2	11.1
	sp|Q6ZQ58|LARP1_MOUSE La-related protein 1 OS=Mus musculus OX=10090 GN=Larp1 PE=1 SV=3	Q6ZQ58;Q6ZQ58-2	La-related protein 1	Larp1	48907	43823	61243	32475	36821	34418	51901	27014	39311		35	35	43.1
	sp|Q8BWW4|LARP4_MOUSE La-related protein 4 OS=Mus musculus OX=10090 GN=Larp4 PE=1 SV=2	Q8BWW4	La-related protein 4	Larp4	9281	5823	15151	4935	0	2006	2974	4678	6428		12	12	23.2
	sp|Q6A0A2|LAR4B_MOUSE La-related protein 4B OS=Mus musculus OX=10090 GN=Larp4b PE=1 SV=2;sp|Q6A0A2-2|LAR4B_MOUSE Isoform 2 of La-related protein 4B OS=Mus musculus OX=10090 GN=Larp4b;sp|Q6A0A2-3|LAR4B_MOUSE Isoform 3 of La-related protein 4B OS=Mus musculu	Q6A0A2;Q6A0A2-2;Q6A0A2-3	La-related protein 4B	Larp4b	2842	573	3604	1781	586	0	1554	1316	1935		7	7	16.5
	sp|Q05CL8|LARP7_MOUSE La-related protein 7 OS=Mus musculus OX=10090 GN=Larp7 PE=1 SV=2	Q05CL8;Q05CL8-2	La-related protein 7	Larp7	12905	22300	31984	19440	17690	10208	18790	15874	22805		12	12	22.8
	sp|Q8BMJ2|SYLC_MOUSE Leucine--tRNA ligase, cytoplasmic OS=Mus musculus OX=10090 GN=Lars PE=1 SV=2	Q8BMJ2	Leucine--tRNA ligase, cytoplasmic	Lars	98610	79123	90393	83265	79431	59031	79302	66174	73828		46	46	45.6
	sp|A2BE28-2|LAS1L_MOUSE Isoform 2 of Ribosomal biogenesis protein LAS1L OS=Mus musculus OX=10090 GN=Las1l;sp|A2BE28|LAS1L_MOUSE Ribosomal biogenesis protein LAS1L OS=Mus musculus OX=10090 GN=Las1l PE=1 SV=1	A2BE28-2;A2BE28	Ribosomal biogenesis protein LAS1L	Las1l	3627	3217	9883	5543	5649	89032	3636	8403	2365		12	12	21.1
	sp|Q61792|LASP1_MOUSE LIM and SH3 domain protein 1 OS=Mus musculus OX=10090 GN=Lasp1 PE=1 SV=1	Q61792	LIM and SH3 domain protein 1	Lasp1	221432	245125	367773	200129	245625	227451	171120	184393	200643		9	9	48.7
	sp|Q3U9G9|LBR_MOUSE Delta(14)-sterol reductase LBR OS=Mus musculus OX=10090 GN=Lbr PE=1 SV=2	Q3U9G9	Lamin-B receptor	Lbr	353138	417566	513882	404483	360085	381240	428169	291140	255454		22	22	33.4
	sp|P06240|LCK_MOUSE Proto-oncogene tyrosine-protein kinase LCK OS=Mus musculus OX=10090 GN=Lck PE=1 SV=4	P06240	Proto-oncogene tyrosine-protein kinase LCK	Lck	78557	116383	138054	144649	112863	114396	152015	108386	111711		21	20	54
	tr|A2RTH5|A2RTH5_MOUSE Leucine carboxyl methyltransferase 1 OS=Mus musculus OX=10090 GN=Lcmt1 PE=1 SV=1;tr|A0A0U1RNF2|A0A0U1RNF2_MOUSE Leucine carboxyl methyltransferase 1 OS=Mus musculus OX=10090 GN=Lcmt1 PE=1 SV=1	A2RTH5;A0A0U1RNF2		Lcmt1	4235	0	1970	6716	990	1779	6195	5655	7373		5	5	17.5
	sp|Q61233|PLSL_MOUSE Plastin-2 OS=Mus musculus OX=10090 GN=Lcp1 PE=1 SV=4	Q61233	Plastin-2	Lcp1	2512810	2224890	3183700	2574490	2573710	2471570	2452710	2197450	2161950		60	53	88.4
	sp|Q60787|LCP2_MOUSE Lymphocyte cytosolic protein 2 OS=Mus musculus OX=10090 GN=Lcp2 PE=1 SV=2	Q60787	Lymphocyte cytosolic protein 2	Lcp2	28692	38929	56399	65384	48023	45364	51982	54112	34779		14	14	41.3
	sp|P70662-2|LDB1_MOUSE Isoform 2 of LIM domain-binding protein 1 OS=Mus musculus OX=10090 GN=Ldb1;sp|P70662-3|LDB1_MOUSE Isoform 3 of LIM domain-binding protein 1 OS=Mus musculus OX=10090 GN=Ldb1;sp|P70662|LDB1_MOUSE LIM domain-binding protein 1 OS=Mus mus	P70662-2;P70662-3;P70662;O55203-3;O55203-2;O55203	LIM domain-binding protein 1	Ldb1	0	0	9703	6415	1760	0	10586	2559	5574		5	5	21.9
	sp|P06151|LDHA_MOUSE L-lactate dehydrogenase A chain OS=Mus musculus OX=10090 GN=Ldha PE=1 SV=3	P06151;P00342;P16125	L-lactate dehydrogenase A chain	Ldha	4383230	4560430	4955270	3054950	3508620	3585480	3789940	2975690	3604640		33	33	85.2
	sp|P35951|LDLR_MOUSE Low-density lipoprotein receptor OS=Mus musculus OX=10090 GN=Ldlr PE=1 SV=2	P35951	Low-density lipoprotein receptor	Ldlr	0	2529	3468	293	1486	1154	755	0	663		9	9	18
	sp|Q5XJE5|LEO1_MOUSE RNA polymerase-associated protein LEO1 OS=Mus musculus OX=10090 GN=Leo1 PE=1 SV=2	Q5XJE5	RNA polymerase-associated protein LEO1	Leo1	6950	5244	10693	2905	6880	7522	5129	5837	6848		3	3	4.9
	sp|Q9Z2I0|LETM1_MOUSE Mitochondrial proton/calcium exchanger protein OS=Mus musculus OX=10090 GN=Letm1 PE=1 SV=1	Q9Z2I0	LETM1 and EF-hand domain-containing protein 1, mitochondrial	Letm1	15823	18215	32703	30517	16828	18754	19586	23251	14185		18	18	35
	sp|P16045|LEG1_MOUSE Galectin-1 OS=Mus musculus OX=10090 GN=Lgals1 PE=1 SV=3	P16045	Galectin-1	Lgals1	158954	321585	335881	277912	184786	584965	326369	324811	317089		9	9	86.7
	sp|P16110|LEG3_MOUSE Galectin-3 OS=Mus musculus OX=10090 GN=Lgals3 PE=1 SV=3	P16110	Galectin-3	Lgals3	81082	112034	82148	83208	52788	208072	109501	113188	72931		6	6	20.1
	sp|Q07797|LG3BP_MOUSE Galectin-3-binding protein OS=Mus musculus OX=10090 GN=Lgals3bp PE=1 SV=1	Q07797	Galectin-3-binding protein	Lgals3bp	115763	104004	127562	115340	82970	106919	133647	113771	95673		15	15	36.7
	sp|O08573-3|LEG9_MOUSE Isoform 3 of Galectin-9 OS=Mus musculus OX=10090 GN=Lgals9;sp|O08573-2|LEG9_MOUSE Isoform 2 of Galectin-9 OS=Mus musculus OX=10090 GN=Lgals9;sp|O08573|LEG9_MOUSE Galectin-9 OS=Mus musculus OX=10090 GN=Lgals9 PE=1 SV=1	O08573-3;O08573-2;O08573	Galectin-9	Lgals9	7738	6131	12265	12448	9846	5885	5629	8788	5674		6	6	23.5
	sp|P37913|DNLI1_MOUSE DNA ligase 1 OS=Mus musculus OX=10090 GN=Lig1 PE=1 SV=2	P37913	DNA ligase 1	Lig1	40281	58042	65508	87744	76497	63055	60763	67107	83816		34	34	41
	sp|P97386-2|DNLI3_MOUSE Isoform Beta of DNA ligase 3 OS=Mus musculus OX=10090 GN=Lig3;sp|P97386|DNLI3_MOUSE DNA ligase 3 OS=Mus musculus OX=10090 GN=Lig3 PE=1 SV=2	P97386-2;P97386	DNA ligase 3	Lig3	4189	3767	848	1035	779	0	269	3670	2806		12	12	14.7
	sp|Q9QXD8|LIMD1_MOUSE LIM domain-containing protein 1 OS=Mus musculus OX=10090 GN=Limd1 PE=1 SV=2	Q9QXD8	LIM domain-containing protein 1	Limd1	2053	0	2168	797	1982	2970	1934	1865	1755		2	2	5.4
	sp|Q8BGB5|LIMD2_MOUSE LIM domain-containing protein 2 OS=Mus musculus OX=10090 GN=Limd2 PE=1 SV=1	Q8BGB5;Q9ERG0-2;Q9ERG0	LIM domain-containing protein 2	Limd2	184907	119795	153459	123321	113842	88331	139309	81359	88992		6	6	53.9
	sp|Q9EQR5|LIME1_MOUSE Lck-interacting transmembrane adapter 1 OS=Mus musculus OX=10090 GN=Lime1 PE=1 SV=1	Q9EQR5	Lck-interacting transmembrane adapter 1	Lime1	0	2510	3577	2451	0	911	4515	0	0		4	4	22.3
	sp|Q99JW4|LIMS1_MOUSE LIM and senescent cell antigen-like-containing domain protein 1 OS=Mus musculus OX=10090 GN=Lims1 PE=1 SV=3	Q99JW4;Q91XD2	LIM and senescent cell antigen-like-containing domain protein 1	Lims1	5148	25336	0	5988	14864	6251	4041	7902	12516		8	8	35.4
	sp|Q9Z0M5|LICH_MOUSE Lysosomal acid lipase/cholesteryl ester hydrolase OS=Mus musculus OX=10090 GN=Lipa PE=1 SV=2	Q9Z0M5	Lysosomal acid lipase/cholesteryl ester hydrolase	Lipa	8219	2671	2787	0	0	1568	2518	2139	2042		2	2	5.8
	sp|Q9D945-2|LLPH_MOUSE Isoform 2 of Protein LLP homolog OS=Mus musculus OX=10090 GN=Llph;sp|Q9D945|LLPH_MOUSE Protein LLP homolog OS=Mus musculus OX=10090 GN=Llph PE=1 SV=1	Q9D945-2;Q9D945	Protein LLP homolog	Llph	0	20120	36196	0	23050	0	0	30382	27311		2	2	21.7
	sp|Q9D0F3|LMAN1_MOUSE Protein ERGIC-53 OS=Mus musculus OX=10090 GN=Lman1 PE=1 SV=1	Q9D0F3	Protein ERGIC-53	Lman1	67561	58172	69571	46658	39977	56693	77811	46458	52196		10	10	35.4
	sp|Q9DBH5|LMAN2_MOUSE Vesicular integral-membrane protein VIP36 OS=Mus musculus OX=10090 GN=Lman2 PE=1 SV=2	Q9DBH5	Vesicular integral-membrane protein VIP36	Lman2	149246	117941	139992	106799	84892	98744	110939	91184	90798		19	19	57
	sp|Q3U3R4-3|LMF1_MOUSE Isoform 3 of Lipase maturation factor 1 OS=Mus musculus OX=10090 GN=Lmf1;sp|Q3U3R4-2|LMF1_MOUSE Isoform 2 of Lipase maturation factor 1 OS=Mus musculus OX=10090 GN=Lmf1;sp|Q3U3R4|LMF1_MOUSE Lipase maturation factor 1 OS=Mus musculus	Q3U3R4-3;Q3U3R4-2;Q3U3R4	Lipase maturation factor 1	Lmf1	0	0	0	35062	48016	42829	49524	42024	35529		2	2	5.6
	sp|Q8C3X8|LMF2_MOUSE Lipase maturation factor 2 OS=Mus musculus OX=10090 GN=Lmf2 PE=1 SV=1	Q8C3X8	Lipase maturation factor 2	Lmf2	9386	14065	16378	6100	2402	4428	16580	9835	4194		4	4	8.7
	sp|P48678|LMNA_MOUSE Prelamin-A/C OS=Mus musculus OX=10090 GN=Lmna PE=1 SV=2;sp|P48678-2|LMNA_MOUSE Isoform C of Prelamin-A/C OS=Mus musculus OX=10090 GN=Lmna;sp|P48678-3|LMNA_MOUSE Isoform C2 of Prelamin-A/C OS=Mus musculus OX=10090 GN=Lmna	P48678;P48678-2;P48678-3	Prelamin-A/C;Lamin-A/C	Lmna	4769	5735	8766	5453	8889	8409	4833	7459	5233		10	10	16.7
	sp|P14733|LMNB1_MOUSE Lamin-B1 OS=Mus musculus OX=10090 GN=Lmnb1 PE=1 SV=3	P14733	Lamin-B1	Lmnb1	748498	789886	974338	990653	871696	965237	865646	990754	760196		46	43	71.3
	sp|P21619|LMNB2_MOUSE Lamin-B2 OS=Mus musculus OX=10090 GN=Lmnb2 PE=1 SV=2;sp|P21619-2|LMNB2_MOUSE Isoform B3 of Lamin-B2 OS=Mus musculus OX=10090 GN=Lmnb2	P21619;P21619-2	Lamin-B2	Lmnb2	5699	23001	13682	26674	11450	13377	4636	11468	18821		21	21	54.2
	sp|Q7TQ95|LNP_MOUSE Endoplasmic reticulum junction formation protein lunapark OS=Mus musculus OX=10090 GN=Lnpk PE=1 SV=1	Q7TQ95	Protein lunapark	Lnp	2696	7132	21116	19865	0	2130	21605	18552	3611		6	6	16
	sp|Q8C129|LCAP_MOUSE Leucyl-cystinyl aminopeptidase OS=Mus musculus OX=10090 GN=Lnpep PE=1 SV=1	Q8C129	Leucyl-cystinyl aminopeptidase	Lnpep	69515	78095	77430	68005	63204	69084	91203	66601	69782		27	27	35.1
	sp|Q8CGK3|LONM_MOUSE Lon protease homolog, mitochondrial OS=Mus musculus OX=10090 GN=Lonp1 PE=1 SV=2	Q8CGK3	Lon protease homolog, mitochondrial	Lonp1	13686	17423	13094	13664	6239	11220	17770	8754	8069		21	21	28.7
	sp|Q3TFD2|PCAT1_MOUSE Lysophosphatidylcholine acyltransferase 1 OS=Mus musculus OX=10090 GN=Lpcat1 PE=1 SV=1;sp|Q3TFD2-2|PCAT1_MOUSE Isoform 2 of Lysophosphatidylcholine acyltransferase 1 OS=Mus musculus OX=10090 GN=Lpcat1;sp|Q3TFD2-3|PCAT1_MOUSE Isoform 3	Q3TFD2;Q3TFD2-2;Q3TFD2-3	Lysophosphatidylcholine acyltransferase 1	Lpcat1	600	0	0	611	1640	1846	3969	2248	0		6	6	17
	sp|Q91V01|MBOA5_MOUSE Lysophospholipid acyltransferase 5 OS=Mus musculus OX=10090 GN=Lpcat3 PE=1 SV=1	Q91V01	Lysophospholipid acyltransferase 5	Lpcat3	10993	14253	14647	17561	9670	7300	9357	14407	5534		4	4	13.6
	sp|Q6NVG1|LPCT4_MOUSE Lysophospholipid acyltransferase LPCAT4 OS=Mus musculus OX=10090 GN=Lpcat4 PE=1 SV=1	Q6NVG1	Lysophospholipid acyltransferase LPCAT4	Lpcat4	3131	14557	0	8014	2553	1366	0	0	2974		5	5	16.4
	sp|Q8BFW7|LPP_MOUSE Lipoma-preferred partner homolog OS=Mus musculus OX=10090 GN=Lpp PE=1 SV=1;sp|Q8BFW7-4|LPP_MOUSE Isoform 4 of Lipoma-preferred partner homolog OS=Mus musculus OX=10090 GN=Lpp;sp|Q8BFW7-5|LPP_MOUSE Isoform 5 of Lipoma-preferred partner h	Q8BFW7;Q8BFW7-4;Q8BFW7-5	Lipoma-preferred partner homolog	Lpp	1057	0	6561	1429	1279	2819	2238	1137	0		5	5	15.8
	sp|Q99N69|LPXN_MOUSE Leupaxin OS=Mus musculus OX=10090 GN=Lpxn PE=1 SV=2	Q99N69	Leupaxin	Lpxn	19164	21855	15855	23012	14732	40728	51358	20224	46282		12	12	47.4
	sp|Q9ESE1-3|LRBA_MOUSE Isoform 3 of Lipopolysaccharide-responsive and beige-like anchor protein OS=Mus musculus OX=10090 GN=Lrba;sp|Q9ESE1-2|LRBA_MOUSE Isoform 2 of Lipopolysaccharide-responsive and beige-like anchor protein OS=Mus musculus OX=10090 GN=Lrb	Q9ESE1-3;Q9ESE1-2;Q9ESE1;Q9EPN1-3;Q9EPN1-4;Q9EPN1	Lipopolysaccharide-responsive and beige-like anchor protein	Lrba	981	1924	981	1471	1461	1023	1688	1130	1090		11	11	5.5
	sp|Q8BVU0|LRCH3_MOUSE Leucine-rich repeat and calponin homology domain-containing protein 3 OS=Mus musculus OX=10090 GN=Lrch3 PE=1 SV=3	Q8BVU0	Leucine-rich repeat and calponin homology domain-containing protein 3	Lrch3	3662	1771	2894	7866	4980	4124	2536	4075	2603		4	4	7.7
	sp|Q921G6|LRCH4_MOUSE Leucine-rich repeat and calponin homology domain-containing protein 4 OS=Mus musculus OX=10090 GN=Lrch4 PE=1 SV=1	Q921G6	Leucine-rich repeat and calponin homology domain-containing protein 4	Lrch4	4026	1052	3285	4158	2485	5947	4711	6269	1230		7	7	15.6
	sp|P55302|AMRP_MOUSE Alpha-2-macroglobulin receptor-associated protein OS=Mus musculus OX=10090 GN=Lrpap1 PE=1 SV=1	P55302	Alpha-2-macroglobulin receptor-associated protein	Lrpap1	19468	12317	6076	14060	5562	10326	21192	18620	5024		6	6	20.8
	sp|Q6PB66|LPPRC_MOUSE Leucine-rich PPR motif-containing protein, mitochondrial OS=Mus musculus OX=10090 GN=Lrpprc PE=1 SV=2	Q6PB66	Leucine-rich PPR motif-containing protein, mitochondrial	Lrpprc	84884	66472	96613	84008	64742	59169	93802	61825	66761		61	61	53.2
	sp|Q9CRC8|LRC40_MOUSE Leucine-rich repeat-containing protein 40 OS=Mus musculus OX=10090 GN=Lrrc40 PE=1 SV=2	Q9CRC8	Leucine-rich repeat-containing protein 40	Lrrc40	10043	7093	13955	12397	12796	10080	19173	13646	9503		18	18	38.9
	sp|Q505F5|LRC47_MOUSE Leucine-rich repeat-containing protein 47 OS=Mus musculus OX=10090 GN=Lrrc47 PE=1 SV=1	Q505F5	Leucine-rich repeat-containing protein 47	Lrrc47	65467	49177	57424	50412	38161	40915	45881	42797	33801		17	17	34.8
	sp|Q9D1G5|LRC57_MOUSE Leucine-rich repeat-containing protein 57 OS=Mus musculus OX=10090 GN=Lrrc57 PE=1 SV=1	Q9D1G5	Leucine-rich repeat-containing protein 57	Lrrc57	8108	3026	11060	7886	7353	8672	9824	6758	5744		4	4	18.8
	sp|Q922Q8|LRC59_MOUSE Leucine-rich repeat-containing protein 59 OS=Mus musculus OX=10090 GN=Lrrc59 PE=1 SV=1	Q922Q8	Leucine-rich repeat-containing protein 59	Lrrc59	178378	178484	631380	429284	280969	192675	314537	298972	312132		12	12	47.6
[truncated: 1,964 more rows]

## Sheet: fold change + q val
					PIM447 / DMSO			AZD1208 / DMSO
[truncated: 3,547 more rows]

## Sheet: protein content per cell
	DMSO			PIM447			AZD1208
	BR1	BR2	BR3	BR1	BR2	BR3	BR1	BR2	BR3
[truncated: 1 more rows]
