# Supplementary material for: PIM kinase control of CD8 T cell protein synthesis and cell trafficking
Source: eLife. 2025 May 13;13:RP98622. doi: 10.7554/eLife.98622 (PMC12074636; doi:10.7554/eLife.98622)
Supplement: Supplementary file 6. [file elife-98622-supp6.xlsx]

## Sheet: TPM, DE analysis
Day 6, IL2 expanded CD8 T cells, RNAseq				mRNA expression - Transcript Per Million (TPM)							DE analysis
				WT			Pim dKO				Pim dKO / WT
	ensembl_gene_id	description	mgi_symbol	BR1	BR2	BR3	BR1	BR2	BR3		Fold-change (log2)	q-value	p-value (unadjusted)
	ENSMUSG00000031155	proviral integration site 2 [Source:MGI Symbol;Acc:MGI:97587]	Pim2	127.82	130.207	134.91	4.01312	2.88332	2.48306		-5.53938	1.98416e-14	2.53296e-18
	ENSMUSG00000078249	high mobility group AT-hook 1B [Source:MGI Symbol;Acc:MGI:96161]	Hmga1b	3.12357	4.00178	3.70965	143.547	73.5303	73.455		4.43406	2.28994e-08	5.84663e-12
	ENSMUSG00000117786	predicted gene 10503 [Source:MGI Symbol;Acc:MGI:3642784]	Gm10503	0	0	0	3.29675	2.12756	1.53378		7.36006	1.05645e-06	4.04595e-10
	ENSMUSG00000030149	killer cell lectin-like receptor subfamily K, member 1 [Source:MGI Symbol;Acc:MGI:1196250]	Klrk1	45.1886	40.1604	42.7703	77.7445	59.5298	61.8518		0.55932	3.12023e-05	1.93145e-08
	ENSMUSG00000075391	glyoxalase 1, pseudogene [Source:MGI Symbol;Acc:MGI:3649615]	Glo1-ps	4.57561	4.31942	6.16848	40.8746	26.0069	22.9927		2.25355	3.12023e-05	2.40575e-08
	ENSMUSG00000024026	glyoxalase 1 [Source:MGI Symbol;Acc:MGI:95742]	Glo1	9.89183	9.92415	9.59876	21.0172	16.3908	16.8263		0.821122	3.12023e-05	2.78828e-08
	ENSMUSG00000097125	predicted gene, 26885 [Source:MGI Symbol;Acc:MGI:5477379]	Gm26885	0.122093	0.0344986	0.086217	1.35209	1.12685	0.879537		3.64545	3.12023e-05	2.23844e-08
	ENSMUSG00000033826	dynein, axonemal, heavy chain 8 [Source:MGI Symbol;Acc:MGI:107714]	Dnah8	3.81324	4.16274	3.97531	17.0578	10.3016	9.25304		1.39216	3.74886e-05	3.82861e-08
*note: due to the design of the Pim1 KO mouse read alignment to the Pim1 gene is detected. Pim1 protein deletion has been verifed in these mice.	ENSMUSG00000024014	proviral integration site 1 [Source:MGI Symbol;Acc:MGI:97584]	Pim1	176.51	184.544	183.269	100.314	129.763	119.496		-0.558614	0.000104889	1.2051e-07
	ENSMUSG00000056290	membrane-spanning 4-domains, subfamily A, member 4B [Source:MGI Symbol;Acc:MGI:1913083]	Ms4a4b	105.478	88.9845	104.703	203.083	140.708	141.503		0.552591	0.000392844	5.5165e-07
	ENSMUSG00000040699	LIM domain containing 2 [Source:MGI Symbol;Acc:MGI:1915053]	Limd2	66.4494	61.651	71.837	158.532	100.554	96.9002		0.618007	0.000392844	5.1021e-07
	ENSMUSG00000042644	inositol 1,4,5-triphosphate receptor 3 [Source:MGI Symbol;Acc:MGI:96624]	Itpr3	56.6208	54.844	58.2848	41.5582	44.744	44.4823		-0.348009	0.000395833	6.06379e-07
	ENSMUSG00000032812	ArfGAP with RhoGAP domain, ankyrin repeat and PH domain 1 [Source:MGI Symbol;Acc:MGI:1916960]	Arap1	33.1658	31.4325	33.5695	23.7922	26.3157	23.9194		-0.381581	0.000480077	7.96719e-07
	ENSMUSG00000001128	complement factor properdin [Source:MGI Symbol;Acc:MGI:97545]	Cfp	41.624	44.2552	37.657	12.4142	21.1325	23.5998		-0.896456	0.000786208	1.5055e-06
	ENSMUSG00000014686	carcinoembryonic antigen-related cell adhesion molecule 16 [Source:MGI Symbol;Acc:MGI:2685615]	Ceacam16	45.8897	36.5858	35.1474	17.8061	20.7459	18.2798		-0.930281	0.000786208	1.4178e-06
	ENSMUSG00000027087	integrin alpha V [Source:MGI Symbol;Acc:MGI:96608]	Itgav	76.3124	70.625	74.7902	47.883	58.3609	56.7608		-0.372277	0.000799793	1.81446e-06
	ENSMUSG00000029810	transmembrane protein 176B [Source:MGI Symbol;Acc:MGI:1916348]	Tmem176b	11.4408	11.1219	13.0639	24.8764	21.9663	17.657		0.732441	0.000799793	1.75404e-06
	ENSMUSG00000043251	exocyst complex component 3-like [Source:MGI Symbol;Acc:MGI:3041195]	Exoc3l	19.5978	18.7014	20.9022	11.7055	13.7772	13.1246		-0.582583	0.000799793	1.83781e-06
	ENSMUSG00000110631	predicted gene, 42047 [Source:MGI Symbol;Acc:MGI:5624932]	Gm42047	123.934	70.9154	105.574	23.1661	46.8816	28.3066		-1.48051	0.00080403	1.95019e-06
	ENSMUSG00000029632	Ndufa4, mitochondrial complex associated [Source:MGI Symbol;Acc:MGI:107686]	Ndufa4	160.649	157.306	162.67	254.342	201.283	204.017		0.380626	0.000811058	2.07078e-06
	ENSMUSG00000050989	selenoprotein N [Source:MGI Symbol;Acc:MGI:2151208]	Selenon	36.4567	33.0892	33.3346	18.0043	22.7003	24.4661		-0.545142	0.000888575	2.38212e-06
	ENSMUSG00000024677	membrane-spanning 4-domains, subfamily A, member 6B [Source:MGI Symbol;Acc:MGI:1917024]	Ms4a6b	78.8065	70.2753	75.9143	164.218	98.2101	106.148		0.523211	0.000919694	2.69751e-06
	ENSMUSG00000021728	embigin [Source:MGI Symbol;Acc:MGI:95321]	Emb	79.0093	74.6494	80.5914	104.076	94.7486	91.6121		0.275517	0.000919694	2.81777e-06
	ENSMUSG00000045349	SH2 domain containing 5 [Source:MGI Symbol;Acc:MGI:2446215]	Sh2d5	85.9553	75.7276	79.6377	45.054	56.5068	57.2859		-0.507314	0.000919694	2.80661e-06
	ENSMUSG00000039087	ras responsive element binding protein 1 [Source:MGI Symbol;Acc:MGI:2443664]	Rreb1	17.0415	15.7032	16.1579	10.6001	11.3801	12.7104		-0.435537	0.000975616	3.11365e-06
	ENSMUSG00000059901	a disintegrin-like and metallopeptidase (reprolysin type) with thrombospondin type 1 motif, 14 [Source:MGI Symbol;Acc:MGI:2179942]	Adamts14	21.7889	21.6802	19.1193	4.6561	11.5491	9.26175		-1.05091	0.000996828	3.3086e-06
	ENSMUSG00000025432	advillin [Source:MGI Symbol;Acc:MGI:1333798]	Avil	10.7685	15.7225	11.0346	1.37231	3.71678	5.10606		-1.58332	0.00101923	3.51308e-06
	ENSMUSG00000085396	functional intergenic repeating RNA element [Source:MGI Symbol;Acc:MGI:2147989]	Firre	32.9201	22.1889	26.2811	16.4128	17.0644	16.8036		-0.633325	0.00112074	4.1491e-06
	ENSMUSG00000021136	SPARC related modular calcium binding 1 [Source:MGI Symbol;Acc:MGI:1929878]	Smoc1	1.81598	1.89389	2.30826	0.576796	0.756923	0.28817		-2.06486	0.00112074	4.1129e-06
	ENSMUSG00000030165	killer cell lectin-like receptor, subfamily D, member 1 [Source:MGI Symbol;Acc:MGI:1196275]	Klrd1	188.058	183.666	191.595	332.637	247.231	271.325		0.504229	0.00124791	5.25442e-06
	ENSMUSG00000064023	kallikrein related-peptidase 8 [Source:MGI Symbol;Acc:MGI:1343327]	Klk8	68.8084	72.793	75.3192	123.084	96.3818	94.9292		0.43546	0.00124791	4.95137e-06
	ENSMUSG00000040284	granzyme G [Source:MGI Symbol;Acc:MGI:109253]	Gzmg	62.858	90.1694	58.9146	1.38647	15.3495	16.8707		-2.33313	0.00124791	5.25714e-06
	ENSMUSG00000034863	anoctamin 8 [Source:MGI Symbol;Acc:MGI:2687327]	Ano8	11.7167	11.9208	11.9405	7.62033	8.67815	8.5666		-0.46183	0.00124791	4.81895e-06
	ENSMUSG00000004266	protein tyrosine phosphatase, non-receptor type 6 [Source:MGI Symbol;Acc:MGI:96055]	Ptpn6	158.15	136.808	162.122	351.328	207.682	217.764		0.5434	0.00125467	5.44576e-06
	ENSMUSG00000112963	predicted gene 6093 [Source:MGI Symbol;Acc:MGI:3648840]	Gm6093	20.2545	11.7908	14.255	5.62106	6.81174	7.88295		-1.02148	0.00143449	6.4094e-06
	ENSMUSG00000028362	tumor necrosis factor (ligand) superfamily, member 8 [Source:MGI Symbol;Acc:MGI:88328]	Tnfsf8	50.0591	43.5694	48.2178	83.1924	63.9166	70.303		0.54196	0.00144394	7.74193e-06
	ENSMUSG00000009681	BCR activator of RhoGEF and GTPase [Source:MGI Symbol;Acc:MGI:88141]	Bcr	56.7779	56.6669	57.8675	27.0801	43.1288	39.2897		-0.516638	0.00144394	7.33968e-06
	ENSMUSG00000034707	glucosamine (N-acetyl)-6-sulfatase [Source:MGI Symbol;Acc:MGI:1922862]	Gns	27.9712	25.9577	27.0815	19.6213	20.0385	21.8612		-0.361274	0.00144394	7.4888e-06
	ENSMUSG00000021493	PDZ and LIM domain 7 [Source:MGI Symbol;Acc:MGI:1914649]	Pdlim7	20.02	18.975	18.4743	10.5783	13.643	13.7354		-0.481484	0.00144394	7.63649e-06
	ENSMUSG00000032666	RIKEN cDNA 1700025G04 gene [Source:MGI Symbol;Acc:MGI:1916649]	1700025G04Rik	7.44205	5.87824	7.58557	20.2174	10.5507	11.1387		0.702952	0.00144394	6.9123e-06
	ENSMUSG00000040998	nephronectin [Source:MGI Symbol;Acc:MGI:2148811]	Npnt	6.26988	6.63222	6.42235	0.727193	2.05815	3.07351		-1.51104	0.00144394	7.46007e-06
	ENSMUSG00000062380	tubulin, beta 3 class III [Source:MGI Symbol;Acc:MGI:107813]	Tubb3	0.988695	0.672225	0.567268	1.8891	2.0605	2.03741		1.61513	0.00144394	7.00179e-06
	ENSMUSG00000030924	RNA exonuclease 5 [Source:MGI Symbol;Acc:MGI:1919402]	Rexo5	79.8501	65.1945	70.7051	57.6913	56.7956	51.7087		-0.365675	0.00151751	8.33013e-06
	ENSMUSG00000076928	T cell receptor alpha constant [Source:MGI Symbol;Acc:MGI:4439838]	Trac	792.95	739.267	813.028	1271.89	965.6	949.377		0.33424	0.00152364	1.06979e-05
	ENSMUSG00000026473	glutamate-ammonia ligase (glutamine synthetase) [Source:MGI Symbol;Acc:MGI:95739]	Glul	42.1189	43.8574	43.3208	68.4801	53.0169	50.8782		0.32339	0.00152364	9.89524e-06
	ENSMUSG00000032220	myosin IE [Source:MGI Symbol;Acc:MGI:106621]	Myo1e	53.8094	52.615	51.7881	19.1343	33.8873	34.6568		-0.677028	0.00152364	9.44685e-06
	ENSMUSG00000015839	nuclear factor, erythroid derived 2, like 2 [Source:MGI Symbol;Acc:MGI:108420]	Nfe2l2	28.7967	26.7346	29.59	52.59	35.9959	37.7451		0.422989	0.00152364	1.04432e-05
	ENSMUSG00000036948	microtubule associated protein 11 [Source:MGI Symbol;Acc:MGI:2385896]	Map11	40.087	32.9975	35.5542	28.469	25.232	26.5369		-0.440022	0.00152364	9.99326e-06
	ENSMUSG00000018334	kinase suppressor of ras 1 [Source:MGI Symbol;Acc:MGI:105051]	Ksr1	25.4489	22.3716	26.1646	18.4175	20.1175	18.785		-0.35716	0.00152364	1.0526e-05
	ENSMUSG00000022372	src-like adaptor [Source:MGI Symbol;Acc:MGI:104295]	Sla	15.1293	14.5646	17.4187	36.5084	22.2992	23.555		0.576541	0.00152364	8.89305e-06
	ENSMUSG00000040712	calmodulin binding transcription activator 2 [Source:MGI Symbol;Acc:MGI:2135957]	Camta2	25.0945	22.9101	23.9981	18.8549	19.5888	17.4345		-0.351622	0.00152364	9.11602e-06
	ENSMUSG00000027200	sema domain, transmembrane domain (TM), and cytoplasmic domain, (semaphorin) 6D [Source:MGI Symbol;Acc:MGI:2387661]	Sema6d	25.6681	20.1306	19.6852	2.54232	7.05129	11.0888		-1.40811	0.00152364	9.8904e-06
	ENSMUSG00000051339	RIKEN cDNA 2900026A02 gene [Source:MGI Symbol;Acc:MGI:1920194]	2900026A02Rik	13.7696	13.8288	13.4396	1.61995	6.21764	6.34529		-1.28302	0.00152364	9.79775e-06
	ENSMUSG00000026399	CD55 molecule, decay accelerating factor for complement [Source:MGI Symbol;Acc:MGI:104850]	Cd55	8.22972	9.69138	8.4317	2.88262	4.53567	4.65928		-0.95457	0.00152364	2.85372
	ENSMUSG00000029455	aldehyde dehydrogenase 2, mitochondrial [Source:MGI Symbol;Acc:MGI:99600]	Aldh2	1.28356	1.15804	1.30394	3.19624	2.36997	2.18373		0.906458	0.00152364	9.62237e-06
	ENSMUSG00000117628	predicted gene, 50012 [Source:MGI Symbol;Acc:MGI:6275301]	Gm50012	29.1956	26.5027	24.2192	11.14	16.5244	16.3317		-0.673801	0.00159244	1.14353e-05
	ENSMUSG00000007613	transforming growth factor, beta receptor I [Source:MGI Symbol;Acc:MGI:98728]	Tgfbr1	11.5359	11.5484	11.1901	17.6488	14.8189	13.8766		0.387734	0.00159244	1.15875e-05
	ENSMUSG00000020715	endoplasmic reticulum (ER) to nucleus signalling 1 [Source:MGI Symbol;Acc:MGI:1930134]	Ern1	13.7279	11.4254	11.5391	7.46342	8.93321	8.38199		-0.4634	0.00159645	1.18205e-05
	ENSMUSG00000022156	granzyme E [Source:MGI Symbol;Acc:MGI:109265]	Gzme	412.071	523.672	368.851	14.0339	136.565	130.024		-1.91619	0.00181409	1.36635e-05
	ENSMUSG00000024975	programmed cell death 4 [Source:MGI Symbol;Acc:MGI:107490]	Pdcd4	27.6885	27.8927	30.0307	102.352	49.2254	45.1322		0.824809	0.00186374	1.42753e-05
	ENSMUSG00000092341	metastasis associated lung adenocarcinoma transcript 1 (non-coding RNA) [Source:MGI Symbol;Acc:MGI:1919539]	Malat1	98.4371	66.012	74.088	51.9244	49.229	51.2		-0.591378	0.00192112	1.49602e-05
	ENSMUSG00000046711	high mobility group AT-hook 1 [Source:MGI Symbol;Acc:MGI:96160]	Hmga1	171.38	180.716	186.768	66.188	122.489	112.149		-0.693596	0.00192112	1.52054e-05
	ENSMUSG00000024399	lymphotoxin B [Source:MGI Symbol;Acc:MGI:104796]	Ltb	87.6386	75.3008	98.7715	209.745	126.788	128.404		0.578287	0.00195091	1.59392e-05
	ENSMUSG00000113669	predicted gene, 36723 [Source:MGI Symbol;Acc:MGI:5595882]	Gm36723	22.0578	20.9921	19.8298	6.00231	12.8539	12.6039		-0.774961	0.00195091	1.581e-05
	ENSMUSG00000022489	phosphodiesterase 1B, Ca2+-calmodulin dependent [Source:MGI Symbol;Acc:MGI:97523]	Pde1b	10.3536	9.09694	9.74337	6.96015	6.53125	5.78775		-0.621347	0.00202635	1.7073e-05
	ENSMUSG00000031075	anoctamin 1, calcium activated chloride channel [Source:MGI Symbol;Acc:MGI:2142149]	Ano1	0.419945	0.397253	0.438375	0.0398703	0.0761037	0.159355		-1.97281	0.00202635	1.69486e-05
	ENSMUSG00000079186	granzyme C [Source:MGI Symbol;Acc:MGI:109256]	Gzmc	686.642	807.52	618.543	137.026	362.999	368.869		-1.00356	0.00214645	1.88817e-05
	ENSMUSG00000038642	cathepsin S [Source:MGI Symbol;Acc:MGI:107341]	Ctss	40.2901	40.77	44.7176	80.6481	60.5838	55.392		0.497393	0.00214645	1.84258e-05
	ENSMUSG00000022034	establishment of sister chromatid cohesion N-acetyltransferase 2 [Source:MGI Symbol;Acc:MGI:1919238]	Esco2	22.138	21.1724	22.9038	36.7208	27.5013	26.5028		0.334143	0.00214645	1.89069e-05
	ENSMUSG00000046432	brain expressed X-linked 3 [Source:MGI Symbol;Acc:MGI:1338016]	Bex3	142.597	138.325	139.735	192.089	173.686	162.672		0.301747	0.00223274	1.99521e-05
	ENSMUSG00000067629	synaptic Ras GTPase activating protein 1 homolog (rat) [Source:MGI Symbol;Acc:MGI:3039785]	Syngap1	7.44442	8.30106	6.97397	1.70925	4.37326	3.89223		-0.927641	0.00225995	2.04837e-05
	ENSMUSG00000003847	nuclear factor of activated T cells 5 [Source:MGI Symbol;Acc:MGI:1859333]	Nfat5	30.8894	26.1072	26.9533	18.6254	21.1138	20.9526		-0.389826	0.00227429	2.0904e-05
	ENSMUSG00000054435	GTPase, IMAP family member 4 [Source:MGI Symbol;Acc:MGI:1349656]	Gimap4	883.289	843.027	893.792	1302.63	1042.07	1023.04		0.282397	0.00228631	2.13063e-05
	ENSMUSG00000027562	carbonic anhydrase 2 [Source:MGI Symbol;Acc:MGI:88269]	Car2	13.3922	21.1627	18.6448	1.56107	6.3071	8.18044		-1.51438	0.00229423	2.16731e-05
	ENSMUSG00000036098	myelin regulatory factor [Source:MGI Symbol;Acc:MGI:2684944]	Myrf	7.725	7.81306	8.53963	1.60445	4.38308	4.54969		-1.00174	0.00230722	2.23458e-05
	ENSMUSG00000047712	uronyl-2-sulfotransferase [Source:MGI Symbol;Acc:MGI:2442406]	Ust	1.69677	1.67804	1.79728	4.63145	2.83414	3.0247		0.818675	0.00230722	2.23848e-05
	ENSMUSG00000033487	fibronectin type III domain containing 3A [Source:MGI Symbol;Acc:MGI:1196463]	Fndc3a	88.4763	78.9931	81.8153	56.8174	64.5681	68.768		-0.316254	0.0023289	2.28925e-05
	ENSMUSG00000037202	perforin 1 (pore forming protein) [Source:MGI Symbol;Acc:MGI:97551]	Prf1	741.674	853.475	708.309	142.613	432.624	390.397		-0.99374	0.00234682	2.40709e-05
	ENSMUSG00000037410	TBC1 domain family, member 2B [Source:MGI Symbol;Acc:MGI:1914266]	Tbc1d2b	76.3893	67.8916	71.081	60.2291	59.7924	60.1353		-0.235042	0.00234682	2.48417e-05
	ENSMUSG00000000594	GM2 ganglioside activator protein [Source:MGI Symbol;Acc:MGI:95762]	Gm2a	43.7163	48.683	49.16	68.6493	63.7112	57.3929		0.375641	0.00234682	2.51343e-05
	ENSMUSG00000057191	cDNA sequence AB124611 [Source:MGI Symbol;Acc:MGI:3043001]	AB124611	22.8946	17.435	20.0541	50.952	32.585	26.9982		0.666328	0.00234682	2.42916e-05
	ENSMUSG00000023927	special AT-rich sequence binding protein 1 [Source:MGI Symbol;Acc:MGI:105084]	Satb1	15.6398	15.4012	16.9647	35.5761	23.3522	21.0733		0.53119	0.00234682	2.38592e-05
	ENSMUSG00000039997	interferon activated gene 203 [Source:MGI Symbol;Acc:MGI:96428]	Ifi203	14.1146	11.7288	15.2425	33.6218	21.2547	19.2628		0.60394	0.00234682	2.54654e-05
	ENSMUSG00000036661	DENN/MADD domain containing 3 [Source:MGI Symbol;Acc:MGI:2146009]	Dennd3	8.39088	10.0979	8.86652	3.20097	5.73072	5.50965		-0.738993	0.00234682	2.39148e-05
	ENSMUSG00000024130	ATP-binding cassette, sub-family A (ABC1), member 3 [Source:MGI Symbol;Acc:MGI:1351617]	Abca3	2.90607	2.86182	3.34778	6.06353	5.1839	4.21529		0.626695	0.00234682	2.52959e-05
	ENSMUSG00000003541	immediate early response 3 [Source:MGI Symbol;Acc:MGI:104814]	Ier3	75.1163	88.2161	79.7823	46.8016	59.237	55.2267		-0.5015	0.00241598	2.70993e-05
	ENSMUSG00000035168	tetratricopeptide repeat, ankyrin repeat and coiled-coil containing 1 [Source:MGI Symbol;Acc:MGI:1914110]	Tanc1	14.5139	14.675	14.5681	8.56347	11.5081	11.0017		-0.392938	0.00241598	2.7141e-05
	ENSMUSG00000015846	retinoid X receptor alpha [Source:MGI Symbol;Acc:MGI:98214]	Rxra	6.70275	4.32862	5.48328	21.2949	8.64473	11.0819		0.970144	0.00241598	2.68067e-05
	ENSMUSG00000042759	apolipoprotein B receptor [Source:MGI Symbol;Acc:MGI:2176230]	Apobr	74.4996	75.7012	72.9273	40.5204	55.287	53.0217		-0.470547	0.00244421	2.83943e-05
	ENSMUSG00000052673	predicted gene 9887 [Source:MGI Symbol;Acc:MGI:3642578]	Gm9887	9.07159	9.37402	9.81429	4.25391	5.02942	6.54146		-0.763677	0.00244421	2.80844e-05
	ENSMUSG00000040276	protein kinase C and casein kinase substrate in neurons 1 [Source:MGI Symbol;Acc:MGI:1345181]	Pacsin1	0.353809	0.349904	0.449721	4.5197	1.47472	1.69837		2.1011	0.00244421	2.82099e-05
	ENSMUSG00000078920	interferon gamma inducible protein 47 [Source:MGI Symbol;Acc:MGI:99448]	Ifi47	160.566	167.333	175.78	275.35	212.937	211.519		0.371017	0.00252694	3.0735e-05
	ENSMUSG00000035047	KRI1 homolog [Source:MGI Symbol;Acc:MGI:2384899]	Kri1	117.362	107.441	112.152	103.337	96.4096	93.2013		-0.212106	0.00252694	3.12889e-05
	ENSMUSG00000021819	zinc finger SWIM-type containing 8 [Source:MGI Symbol;Acc:MGI:1919156]	Zswim8	39.1979	38.433	37.9093	32.043	31.7298	30.8318		-0.271043	0.00252694	3.06915e-05
	ENSMUSG00000019256	aryl-hydrocarbon receptor [Source:MGI Symbol;Acc:MGI:105043]	Ahr	18.3362	19.2452	21.0426	24.8665	26.1525	25.5552		0.37909	0.00252694	3.01126e-05
	ENSMUSG00000013418	beta-1,4-N-acetyl-galactosaminyl transferase 2 [Source:MGI Symbol;Acc:MGI:1342058]	B4galnt2	22.8581	27.9755	25.8926	1.53695	9.98857	11.5058		-1.50807	0.00252694	3.05863e-05
	ENSMUSG00000059900	transmembrane protein 40 [Source:MGI Symbol;Acc:MGI:2137870]	Tmem40	20.5509	23.9514	18.9306	4.53472	11.0165	11.6123		-0.943859	0.00252694	3.12909e-05
	ENSMUSG00000041607	myelin basic protein [Source:MGI Symbol;Acc:MGI:96925]	Mbp	21.8893	20.4211	23.2726	37.9474	27.5247	27.1881		0.357932	0.00255306	3.19403e-05
	ENSMUSG00000059256	granzyme D [Source:MGI Symbol;Acc:MGI:109255]	Gzmd	597.507	748.764	518.159	19.349	199.763	196.82		-1.86416	0.00255928	3.31756e-05
	ENSMUSG00000028211	transformation related protein 53 inducible nuclear protein 1 [Source:MGI Symbol;Acc:MGI:1926609]	Trp53inp1	42.8384	34.9961	39.0502	81.0096	51.6609	51.4482		0.489187	0.00255928	3.33249e-05
	ENSMUSG00000019302	ATPase, H+ transporting, lysosomal V0 subunit A1 [Source:MGI Symbol;Acc:MGI:103286]	Atp6v0a1	25.1601	22.7407	23.735	9.28501	15.448	16.1863		-0.646386	0.00255928	3.25431e-05
	ENSMUSG00000036353	purinergic receptor P2Y, G-protein coupled 12 [Source:MGI Symbol;Acc:MGI:1918089]	P2ry12	19.994	16.4553	18.0248	7.07867	9.87389	11.5191		-0.798838	0.00255928	3.26942e-05
	ENSMUSG00000006360	cysteine-rich protein 1 (intestinal) [Source:MGI Symbol;Acc:MGI:88501]	Crip1	161.248	158.216	164.74	321.929	201.261	212.191		0.424985	0.00257262	3.40459e-05
	ENSMUSG00000015441	granzyme F [Source:MGI Symbol;Acc:MGI:109254]	Gzmf	21.2271	28.1974	16.3201	0.959967	7.59124	4.50675		-1.91758	0.00257262	3.41555e-05
	ENSMUSG00000076754	T cell receptor gamma variable 2 [Source:MGI Symbol;Acc:MGI:98632]	Trgv2	156.101	132.291	168.668	281.578	247.668	196.29		0.541592	0.00257479	3.48422e-05
	ENSMUSG00000026475	regulator of G-protein signaling 16 [Source:MGI Symbol;Acc:MGI:108407]	Rgs16	83.3032	87.1178	82.6272	20.9601	50.7046	52.595		-0.805869	0.00257479	3.51703e-05
	ENSMUSG00000060470	adhesion G protein-coupled receptor G3 [Source:MGI Symbol;Acc:MGI:1859670]	Adgrg3	10.9328	10.4485	9.59729	5.9684	7.40331	6.04676		-0.576434	0.00257479	3.48562e-05
	ENSMUSG00000030844	regulator of G-protein signalling 10 [Source:MGI Symbol;Acc:MGI:1915115]	Rgs10	18.8223	19.6154	19.3895	25.9279	27.6276	23.4213		0.421054	0.0026781	3.69234e-05
	ENSMUSG00000015709	aryl hydrocarbon receptor nuclear translocator 2 [Source:MGI Symbol;Acc:MGI:107188]	Arnt2	3.36277	3.39989	3.72099	0.786766	2.04928	1.79066		-1.00033	0.00274701	3.82241e-05
	ENSMUSG00000041126	H2A.Z histone variant 2 [Source:MGI Symbol;Acc:MGI:1924855]	H2az2	43.896	45.998	43.9256	99.867	60.3251	55.9347		0.484162	0.0027508	3.86281e-05
	ENSMUSG00000086447	predicted gene 13522 [Source:MGI Symbol;Acc:MGI:3651428]	Gm13522	2.80434	3.13124	2.55524	0.197539	0.848384	0.964982		-1.70512	0.00282614	4.00467e-05
	ENSMUSG00000052085	dedicator of cytokinesis 8 [Source:MGI Symbol;Acc:MGI:1921396]	Dock8	101.744	100.314	106.581	78.6217	88.2824	85.5597		-0.254334	0.00295391	4.22344e-05
	ENSMUSG00000027306	nucleolar and spindle associated protein 1 [Source:MGI Symbol;Acc:MGI:2675669]	Nusap1	116.681	121.159	127.399	195.643	145.174	147.127		0.300743	0.00300219	4.3308e-05
	ENSMUSG00000034832	tet methylcytosine dioxygenase 3 [Source:MGI Symbol;Acc:MGI:2446229]	Tet3	43.8559	37.7648	41.5201	35.3896	33.8115	34.5838		-0.243435	0.00308652	4.49185e-05
	ENSMUSG00000076752	T cell receptor gamma, constant 2 [Source:MGI Symbol;Acc:MGI:98626]	Trgc2	278.346	257.913	289.929	492.124	426.909	338.018		0.501626	0.00309012	4.6154e-05
	ENSMUSG00000001918	solute carrier family 1 (neutral amino acid transporter), member 5 [Source:MGI Symbol;Acc:MGI:105305]	Slc1a5	326.208	315.96	320.833	256.137	279.649	260.223		-0.238279	0.00309012	4.59629e-05
	ENSMUSG00000024940	latent transforming growth factor beta binding protein 3 [Source:MGI Symbol;Acc:MGI:1101355]	Ltbp3	1.76919	2.15246	1.85152	0.680943	1.20693	0.975091		-0.839808	0.00309012	4.61543e-05
	ENSMUSG00000026011	cytotoxic T-lymphocyte-associated protein 4 [Source:MGI Symbol;Acc:MGI:88556]	Ctla4	22.2438	22.3413	22.5995	53.2247	35.207	34.0138		0.701153	0.00316284	4.76442e-05
	ENSMUSG00000027639	SAM domain and HD domain, 1 [Source:MGI Symbol;Acc:MGI:1927468]	Samhd1	89.8211	85.3737	92.5228	146.429	113.118	105.846		0.339324	0.00320021	4.89682e-05
	ENSMUSG00000028059	rho/rac guanine nucleotide exchange factor (GEF) 2 [Source:MGI Symbol;Acc:MGI:103264]	Arhgef2	72.8533	68.8137	71.7743	59.123	61.4117	61.0405		-0.207176	0.00320021	4.90242e-05
	ENSMUSG00000015937	macroH2A.1 histone [Source:MGI Symbol;Acc:MGI:1349392]	Macroh2a1	211.941	219.259	219.181	301.091	254.413	238.261		0.225473	0.00320419	5.06004e-05
	ENSMUSG00000024696	leupaxin [Source:MGI Symbol;Acc:MGI:2147677]	Lpxn	166.116	161.668	160.611	205.45	183.783	185.792		0.221316	0.00320419	5.35846e-05
	ENSMUSG00000028760	eukaryotic translation initiation factor 4 gamma, 3 [Source:MGI Symbol;Acc:MGI:1923935]	Eif4g3	81.6348	75.6775	76.9586	66.5978	66.8982	64.9388		-0.217393	0.00320419	5.23947e-05
	ENSMUSG00000021665	hexosaminidase B [Source:MGI Symbol;Acc:MGI:96074]	Hexb	53.6575	51.3882	54.3556	71.8755	62.6653	63.78		0.274723	0.00320419	5.28337e-05
	ENSMUSG00000024521	phorbol-12-myristate-13-acetate-induced protein 1 [Source:MGI Symbol;Acc:MGI:1930146]	Pmaip1	47.0678	47.5929	44.9629	61.5388	58.9522	52.896		0.315034	0.00320419	5.35835e-05
	ENSMUSG00000024937	EH domain binding protein 1-like 1 [Source:MGI Symbol;Acc:MGI:3612340]	Ehbp1l1	56.4222	57.6845	56.218	34.3488	43.3008	45.7782		-0.36693	0.00320419	5.3382e-05
	ENSMUSG00000026875	TNF receptor-associated factor 1 [Source:MGI Symbol;Acc:MGI:101836]	Traf1	43.18	39.8297	41.6757	27.2096	34.302	32.5317		-0.324671	0.00320419	5.35837e-05
	ENSMUSG00000045382	chemokine (C-X-C motif) receptor 4 [Source:MGI Symbol;Acc:MGI:109563]	Cxcr4	7.27823	5.36685	7.97988	28.4404	13.7712	12.4444		0.984357	0.00320419	5.26447e-05
	ENSMUSG00000046605	UDP-GlcNAc:betaGal beta-1,3-N-acetylglucosaminyltransferase-like 1 [Source:MGI Symbol;Acc:MGI:2441705]	B3gntl1	14.5026	11.6492	12.4191	9.31433	8.99208	9.2274		-0.449703	0.00320419	5.09364e-05
	ENSMUSG00000026883	disabled 2 interacting protein [Source:MGI Symbol;Acc:MGI:1916851]	Dab2ip	4.41521	3.8616	4.09216	1.77762	2.97614	2.4218		-0.644309	0.00320419	5.35022e-05
	ENSMUSG00000034462	polycystin 2, transient receptor potential cation channel [Source:MGI Symbol;Acc:MGI:1099818]	Pkd2	2.06591	2.12169	2.02798	0.731219	1.3366	1.24388		-0.726883	0.00320419	4.97449e-05
	ENSMUSG00000038260	transient receptor potential cation channel, subfamily M, member 4 [Source:MGI Symbol;Acc:MGI:1915917]	Trpm4	5.56573	4.61854	4.96933	3.27124	3.78867	3.55687		-0.442287	0.00325301	5.50535e-05
	ENSMUSG00000001507	integrin alpha 3 [Source:MGI Symbol;Acc:MGI:96602]	Itga3	2.38542	2.8589	2.12702	0.949088	1.34817	1.17623		-0.887503	0.00325301	5.52317e-05
	ENSMUSG00000024457	tripartite motif-containing 26 [Source:MGI Symbol;Acc:MGI:1337056]	Trim26	52.0847	50.4627	50.5593	41.2515	43.2581	41.9686		-0.241898	0.00326377	5.62477e-05
	ENSMUSG00000033705	START domain containing 9 [Source:MGI Symbol;Acc:MGI:3045258]	Stard9	0.418737	0.424468	0.443542	0.142872	0.218169	0.23349		-0.98104	0.00326377	5.59297e-05
	ENSMUSG00000044447	dedicator of cytokinesis 5 [Source:MGI Symbol;Acc:MGI:2652871]	Dock5	24.1029	19.4653	23.4911	15.4728	16.1312	17.0818		-0.43964	0.00330236	5.73342e-05
	ENSMUSG00000109214	predicted gene 44659 [Source:MGI Symbol;Acc:MGI:5753235]	Gm44659	38.1237	23.8261	29.1648	11.8514	16.5526	13.3504		-0.987221	0.00330832	5.82825e-05
	ENSMUSG00000021069	liver glycogen phosphorylase [Source:MGI Symbol;Acc:MGI:97829]	Pygl	1.74108	1.27484	1.48956	3.19873	3.00051	2.37026		0.889569	0.00330832	5.78855e-05
	ENSMUSG00000038534	oxysterol binding protein-like 7 [Source:MGI Symbol;Acc:MGI:1918490]	Osbpl7	24.6459	23.4675	24.5775	20.5437	20.2366	19.3433		-0.274569	0.00331473	5.88186e-05
	ENSMUSG00000066684	paired immunoglobin-like type 2 receptor beta 1 [Source:MGI Symbol;Acc:MGI:2450532]	Pilrb1	49.8998	46.6657	47.0246	28.5934	34.7263	36.4928		-0.429446	0.00335295	6.03528e-05
	ENSMUSG00000049109	thymocyte selection associated [Source:MGI Symbol;Acc:MGI:2443552]	Themis	32.222	30.4006	32.048	56.3801	40.9795	36.2969		0.357198	0.00335295	6.00576e-05
	ENSMUSG00000055296	transmembrane protein 245 [Source:MGI Symbol;Acc:MGI:2445107]	Tmem245	14.5487	12.972	14.5949	10.4128	11.5848	11.5278		-0.293378	0.00336426	6.09858e-05
	ENSMUSG00000095041			34.7816	23.8656	31.7739	23.4931	21.7121	15.0554		-0.685794	0.00339562	6.24212e-05
	ENSMUSG00000074796	solute carrier family 4, sodium bicarbonate transporter-like, member 11 [Source:MGI Symbol;Acc:MGI:2138987]	Slc4a11	11.871	8.35956	8.25232	2.39553	4.64474	5.44236		-0.906779	0.00339562	6.20081e-05
	ENSMUSG00000026924	SEC16 homolog A, endoplasmic reticulum export factor [Source:MGI Symbol;Acc:MGI:2139207]	Sec16a	45.3354	41.3938	45.7901	37.2096	36.6775	37.5685		-0.248226	0.00350219	6.48322e-05
	ENSMUSG00000034731	diacylglycerol kinase, eta [Source:MGI Symbol;Acc:MGI:2444188]	Dgkh	9.21401	7.06792	7.50055	4.81104	5.31437	6.05355		-0.453062	0.00350219	6.52745e-05
	ENSMUSG00000034833	thymocyte expressed, positive selection associated 1 [Source:MGI Symbol;Acc:MGI:1914846]	Tespa1	11.499	10.8098	12.1867	21.4656	15.6707	14.5125		0.430004	0.00361753	6.78861e-05
	ENSMUSG00000029992	glutamine fructose-6-phosphate transaminase 1 [Source:MGI Symbol;Acc:MGI:95698]	Gfpt1	44.5584	46.3107	47.457	31.983	39.4093	36.1531		-0.305317	0.00363291	6.90877e-05
	ENSMUSG00000036006	RHO family interacting cell polarization regulator 2 [Source:MGI Symbol;Acc:MGI:2444879]	Ripor2	4.40245	4.08355	5.00446	12.1181	7.56784	6.62635		0.694652	0.00363291	6.91022e-05
	ENSMUSG00000025626	PHD finger protein 6 [Source:MGI Symbol;Acc:MGI:1918248]	Phf6	51.6494	46.5104	52.3855	73.8471	59.8985	58.6764		0.271839	0.00365604	7.01528e-05
	ENSMUSG00000085148	Mir22 host gene (non-protein coding) [Source:MGI Symbol;Acc:MGI:1914348]	Mir22hg	16.9186	18.2745	14.2349	6.15739	10.2527	8.90151		-0.735324	0.00365604	7.04756e-05
	ENSMUSG00000087387	predicted gene 15420 [Source:MGI Symbol;Acc:MGI:3705302]	Gm15420	0	0	0	4.54747	1.86003	0.577		3.51877	0.00366122	7.15102e-05
	ENSMUSG00000099025	predicted gene 27162 [Source:MGI Symbol;Acc:MGI:5521005]	Gm27162	0.419238	0.368542	0.526308	2.23782	1.55328	1.03897		1.51788	0.00366122	7.10762e-05
	ENSMUSG00000111394	predicted gene, 49759 [Source:MGI Symbol;Acc:MGI:6215263]	Gm49759	28.0929	18.7959	19.5235	15.7902	14.3893	11.8936		-0.622105	0.0036912	7.30383e-05
	ENSMUSG00000037649	histocompatibility 2, class II, locus DMa [Source:MGI Symbol;Acc:MGI:95921]	H2-DMa	7.80024	8.97224	8.6051	20.4689	12.7329	12.4989		0.652286	0.0036912	7.2611e-05
	ENSMUSG00000022696	SID1 transmembrane family, member 1 [Source:MGI Symbol;Acc:MGI:2443155]	Sidt1	28.0826	22.413	26.2381	14.5238	16.6636	19.4294		-0.529101	0.00370589	7.42751e-05
	ENSMUSG00000020482	coiled-coil domain containing 117 [Source:MGI Symbol;Acc:MGI:2144383]	Ccdc117	10.4407	11.138	11.0713	21.7899	15.1244	15.2039		0.536709	0.00370589	7.39479e-05
	ENSMUSG00000030530	furin (paired basic amino acid cleaving enzyme) [Source:MGI Symbol;Acc:MGI:97513]	Furin	58.8218	66.2199	61.1384	32.5305	49.0537	43.8702		-0.442812	0.00386492	7.79557e-05
	ENSMUSG00000024334	histocompatibility 2, O region alpha locus [Source:MGI Symbol;Acc:MGI:95924]	H2-Oa	9.10643	7.7889	8.16858	18.9896	15.4734	11.5359		0.765556	0.00387298	7.86129e-05
	ENSMUSG00000028832	stathmin 1 [Source:MGI Symbol;Acc:MGI:96739]	Stmn1	146.66	149.674	157.553	276.453	190.811	177.633		0.340354	0.0039333	8.1084e-05
	ENSMUSG00000037965	zinc finger CCCH type containing 7 A [Source:MGI Symbol;Acc:MGI:2445044]	Zc3h7a	62.3398	55.6573	56.9694	49.0086	49.1764	45.6795		-0.262175	0.0039333	8.08488e-05
	ENSMUSG00000024140	endothelial PAS domain protein 1 [Source:MGI Symbol;Acc:MGI:109169]	Epas1	20.8972	23.8523	22.5434	2.63784	12.5231	11.4942		-1.09425	0.0039333	8.13435e-05
	ENSMUSG00000021175	cell division cycle associated 7 like [Source:MGI Symbol;Acc:MGI:2384982]	Cdca7l	73.871	69.5518	78.3096	120.846	90.3776	85.9978		0.29114	0.00394696	0.911983
	ENSMUSG00000047898	chemokine (C-C motif) receptor 4 [Source:MGI Symbol;Acc:MGI:107824]	Ccr4	26.4597	27.644	29.7006	40.5839	38.5773	34.1641		0.381978	0.00394696	8.29459e-05
	ENSMUSG00000097352	RIKEN cDNA C920009B18 gene [Source:MGI Symbol;Acc:MGI:3583961]	C920009B18Rik	8.70474	8.13909	7.93513	6.00966	6.06541	5.59349		-0.454757	0.00394696	8.36415e-05
	ENSMUSG00000117495	predicted gene 4125 [Source:MGI Symbol;Acc:MGI:3782301]	Gm4125	7.99874	6.81936	7.69349	0.903441	3.16153	2.80848		-1.45744	0.00394696	8.2335e-05
	ENSMUSG00000020614	FAM20A, golgi associated secretory pathway pseudokinase [Source:MGI Symbol;Acc:MGI:2388266]	Fam20a	114.128	110.826	109.438	60.7261	92.5449	78.5783		-0.40295	0.00395906	8.61705e-05
	ENSMUSG00000110206	FMS-like tyrosine kinase 3 ligand [Source:MGI Symbol;Acc:MGI:95560]	Flt3l	100.28	74.4752	78.8636	64.4774	62.033	60.3276		-0.396719	0.00395906	8.64249e-05
	ENSMUSG00000023088	ATP-binding cassette, sub-family C (CFTR/MRP), member 1 [Source:MGI Symbol;Acc:MGI:102676]	Abcc1	23.1518	23.0702	23.8671	18.6306	20.3392	19.848		-0.219821	0.00395906	8.59179e-05
	ENSMUSG00000039304	tumor necrosis factor (ligand) superfamily, member 10 [Source:MGI Symbol;Acc:MGI:107414]	Tnfsf10	15.0151	13.8522	14.6895	32.3571	18.6156	19.6625		0.482614	0.00395906	8.52453e-05
	ENSMUSG00000017493	insulin-like growth factor binding protein 4 [Source:MGI Symbol;Acc:MGI:96439]	Igfbp4	10.9784	9.66811	11.2042	39.4985	25.6852	17.0594		1.06757	0.00395906	8.48927e-05
	ENSMUSG00000051735	Ras and Rab interactor-like [Source:MGI Symbol;Acc:MGI:2444024]	Rinl	172.158	155.925	172.291	148.183	141.225	138.81		-0.238907	0.00414025	9.09088e-05
	ENSMUSG00000038375	transformation related protein 53 inducible nuclear protein 2 [Source:MGI Symbol;Acc:MGI:1915978]	Trp53inp2	13.0207	13.9845	12.761	3.23646	8.16828	8.11268		-0.790561	0.00414563	9.15562e-05
	ENSMUSG00000024548	SET binding protein 1 [Source:MGI Symbol;Acc:MGI:1933199]	Setbp1	7.0049	7.09963	7.93581	17.9048	11.1424	10.4706		0.604754	0.00416127	9.24329e-05
	ENSMUSG00000053007	cAMP responsive element binding protein 5 [Source:MGI Symbol;Acc:MGI:2443973]	Creb5	0.17992	0.205308	0.247589	0.0755545	0.0961448	0.0850014		-1.28719	0.00416248	9.2991e-05
	ENSMUSG00000023079	general transcription factor II I repeat domain-containing 1 [Source:MGI Symbol;Acc:MGI:1861942]	Gtf2ird1	3.86085	3.44242	3.85341	3.26941	2.64513	2.69748		-0.44783	0.00424051	9.61868e-05
	ENSMUSG00000046774	RIKEN cDNA 8030474K03 gene [Source:MGI Symbol;Acc:MGI:2685988]	8030474K03Rik	0	0.0569641	0	1.06912	0.780272	0.167572		3.85862	0.00424051	9.63582e-05
	ENSMUSG00000028005	guanylate cyclase 1, soluble, beta 1 [Source:MGI Symbol;Acc:MGI:1860604]	Gucy1b1	0.029394	0	0.0207568	0.256746	0.398183	0.142523		3.23912	0.00424051	9.53526e-05
	ENSMUSG00000030342	CD9 antigen [Source:MGI Symbol;Acc:MGI:88348]	Cd9	9.48741	5.47323	8.9727	19.1141	12.4166	14.8959		0.79228	0.00434373	8.21573
	ENSMUSG00000015647	laminin, alpha 5 [Source:MGI Symbol;Acc:MGI:105382]	Lama5	20.0999	14.7557	18.6244	11.742	12.6007	11.5201		-0.558583	0.00435971	0.00010018
	ENSMUSG00000027397	solute carrier family 20, member 1 [Source:MGI Symbol;Acc:MGI:108392]	Slc20a1	427.691	380.275	382.624	236.159	306.202	317.378		-0.352577	0.00437643	0.000101123
	ENSMUSG00000006310	zinc finger and BTB domain containing 32 [Source:MGI Symbol;Acc:MGI:1891838]	Zbtb32	694.54	678.446	671.428	465.14	550.174	558.36		-0.299399	0.00441918	0.000104522
	ENSMUSG00000029528	paxillin [Source:MGI Symbol;Acc:MGI:108295]	Pxn	104.804	101.241	105.24	71.3361	83.8972	86.6221		-0.298022	0.00441918	0.000105044
	ENSMUSG00000030410	dystrophia myotonica-containing WD repeat motif [Source:MGI Symbol;Acc:MGI:94907]	Dmwd	49.0443	48.5922	48.5373	24.5551	40.094	33.2398		-0.446677	0.00441918	0.000107188
	ENSMUSG00000030793	PYD and CARD domain containing [Source:MGI Symbol;Acc:MGI:1931465]	Pycard	33.7178	31.9937	31.661	46.4321	40.4211	38.7953		0.341818	0.00441918	0.000106999
	ENSMUSG00000041836	protein tyrosine phosphatase, receptor type, E [Source:MGI Symbol;Acc:MGI:97813]	Ptpre	38.9708	36.9852	36.0056	19.4092	28.4286	29.0461		-0.397479	0.00441918	0.000103892
	ENSMUSG00000064267	hydrogen voltage-gated channel 1 [Source:MGI Symbol;Acc:MGI:1921346]	Hvcn1	17.8507	16.6284	21.2988	36.7514	28.3572	23.9082		0.486699	0.00441918	0.000105848
	ENSMUSG00000048905	BCL2 interacting protein 5 [Source:MGI Symbol;Acc:MGI:1925441]	Bnip5	18.3526	20.7288	18.6594	5.26029	12.318	12.7399		-0.704731	0.00441918	0.00010478
	ENSMUSG00000020527	myosin XIX [Source:MGI Symbol;Acc:MGI:1913446]	Myo19	14.0697	12.0206	13.1327	10.4183	10.4336	10.1504		-0.323424	0.00441918	0.000105523
	ENSMUSG00000007021	synaptogyrin 3 [Source:MGI Symbol;Acc:MGI:1341881]	Syngr3	0.501628	0.275606	0.432946	1.39966	1.1035	1.13505		1.46899	0.00441918	0.000106323
	ENSMUSG00000050921	purinergic receptor P2Y, G-protein coupled 10 [Source:MGI Symbol;Acc:MGI:1926076]	P2ry10	48.2701	37.4012	43.1068	74.2149	53.3242	54.7678		0.398997	0.00445409	0.000109172
	ENSMUSG00000055538	zinc finger, CCHC domain containing 24 [Source:MGI Symbol;Acc:MGI:1919168]	Zcchc24	10.74	11.4732	11.3047	4.34205	7.20583	7.93416		-0.629469	0.00445409	0.000108898
	ENSMUSG00000030720	ceroid lipofuscinosis, neuronal 3, juvenile (Batten, Spielmeyer-Vogt disease) [Source:MGI Symbol;Acc:MGI:107537]	Cln3	33.9841	31.6936	32.6838	27.5125	27.2564	26.876		-0.253479	0.00449825	0.000110829
	ENSMUSG00000033712	cell cycle activator and apoptosis regulator 2 [Source:MGI Symbol;Acc:MGI:2444228]	Ccar2	119.965	120.92	119.993	104.601	104.143	102.974		-0.196354	0.00455425	0.00011279
	ENSMUSG00000006587	snail family zinc finger 3 [Source:MGI Symbol;Acc:MGI:1353563]	Snai3	61.1184	50.4867	57.2286	43.0422	44.1083	43.8676		-0.344051	0.0045966	0.000114425
	ENSMUSG00000044083	EF-hand calcium binding domain 8 [Source:MGI Symbol;Acc:MGI:3644206]	Efcab8	0.527171	0.521352	0.501128	0.177102	0.190152	0.0786495		-1.87442	0.00460077	0.000115116
	ENSMUSG00000015133	leucine-rich repeat kinase 1 [Source:MGI Symbol;Acc:MGI:2142227]	Lrrk1	54.9321	47.1488	51.3177	29.4196	37.0403	38.9127		-0.44707	0.00460828	0.000115893
	ENSMUSG00000031590	FSHD region gene 1 [Source:MGI Symbol;Acc:MGI:893597]	Frg1	110.048	112.382	105.824	136.802	122.583	128.732		0.244149	0.00473099	0.000119583
	ENSMUSG00000034394	leukemia inhibitory factor [Source:MGI Symbol;Acc:MGI:96787]	Lif	49.1971	48.208	47.989	95.0006	64.3439	57.024		0.410378	0.00475206	0.000120722
	ENSMUSG00000003038	high mobility group nucleosomal binding domain 2 [Source:MGI Symbol;Acc:MGI:96136]	Hmgn2	231.728	243.122	243.471	338.922	283.409	275.858		0.260652	0.00476889	0.000121758
	ENSMUSG00000001123	lectin, galactose binding, soluble 9 [Source:MGI Symbol;Acc:MGI:109496]	Lgals9	97.4972	92.7351	96.7311	148.205	114.316	109.581		0.279675	0.00495786	0.000127516
	ENSMUSG00000025289	peroxiredoxin 4 [Source:MGI Symbol;Acc:MGI:1859815]	Prdx4	24.2261	23.8503	23.6873	48.9518	37.9237	28.6489		0.547533	0.00495786	0.000127849
	ENSMUSG00000020572	nicotinamide phosphoribosyltransferase [Source:MGI Symbol;Acc:MGI:1929865]	Nampt	94.0982	99.8809	101.592	122.19	117.021	113.267		0.237038	0.00495836	0.000129749
	ENSMUSG00000032333	stomatin-like 1 [Source:MGI Symbol;Acc:MGI:1916356]	Stoml1	29.8932	25.4295	24.4826	18.5398	18.6276	19.9049		-0.404106	0.00495836	0.000129761
	ENSMUSG00000000782	transcription factor 7, T cell specific [Source:MGI Symbol;Acc:MGI:98507]	Tcf7	2.9823	2.57125	4.58994	38.5312	9.16358	9.8627		1.55102	0.00495836	0.000129723
	ENSMUSG00000039936	phosphatidylinositol-4,5-bisphosphate 3-kinase catalytic subunit delta [Source:MGI Symbol;Acc:MGI:1098211]	Pik3cd	508.177	502.057	527.699	420.697	448.016	435.43		-0.216058	0.00497953	0.000131369
	ENSMUSG00000040451	sphingomyelin synthase 1 [Source:MGI Symbol;Acc:MGI:2444110]	Sgms1	1.53236	1.50462	1.46855	3.02348	2.28109	2.06978		0.611533	0.00497953	0.000132858
	ENSMUSG00000076612	immunoglobulin heavy constant gamma 2C [Source:MGI Symbol;Acc:MGI:2686979]	Ighg2c	0.870514	0.946996	1.29091	0.285136	0.0907104	0.337671		-2.29952	0.00497953	0.000131903
	ENSMUSG00000033316	polypeptide N-acetylgalactosaminyltransferase 9 [Source:MGI Symbol;Acc:MGI:2677965]	Galnt9	0.0383999	0	0.0271164	0.0419262	0.320112	0.260667		2.88038	0.00497953	0.000132314
	ENSMUSG00000045362	tumor necrosis factor receptor superfamily, member 26 [Source:MGI Symbol;Acc:MGI:2651928]	Tnfrsf26	12.8774	10.2166	13.9822	31.7229	18.0909	18.4012		0.595669	0.00499553	0.000133922
	ENSMUSG00000041168	lon peptidase 1, mitochondrial [Source:MGI Symbol;Acc:MGI:1921392]	Lonp1	134.589	134.278	136.207	114.216	121.602	113.601		-0.188909	0.00507444	0.000139885
	ENSMUSG00000017639	RAB11 family interacting protein 4 (class II) [Source:MGI Symbol;Acc:MGI:2442920]	Rab11fip4	32.0992	29.171	30.4891	14.3773	21.6801	22.4897		-0.509479	0.00507444	0.000138234
	ENSMUSG00000054920	kelch-like 5 [Source:MGI Symbol;Acc:MGI:1919028]	Klhl5	18.6795	19.5248	20.3058	15.1086	15.5444	16.2268		-0.306952	0.00507444	0.000138763
	ENSMUSG00000051727	potassium channel tetramerisation domain containing 14 [Source:MGI Symbol;Acc:MGI:1289222]	Kctd14	7.50656	9.77972	9.10979	3.53355	5.99536	4.66408		-0.780173	0.00507444	0.000138421
	ENSMUSG00000068923	synaptotagmin XI [Source:MGI Symbol;Acc:MGI:1859547]	Syt11	3.68135	3.48719	3.66452	7.40926	5.63858	4.96785		0.610968	0.00507444	0.000136906
	ENSMUSG00000001552	junction plakoglobin [Source:MGI Symbol;Acc:MGI:96650]	Jup	4.25061	3.49421	3.73618	0.86161	1.71938	2.59148		-0.949871	0.00507444	0.000139924
	ENSMUSG00000021256	vasohibin 1 [Source:MGI Symbol;Acc:MGI:2442543]	Vash1	82.209	83.7613	89.7291	47.6189	64.8847	66.3703		-0.429213	0.00515737	0.000143497
	ENSMUSG00000020806	rhomboid 5 homolog 2 [Source:MGI Symbol;Acc:MGI:2442473]	Rhbdf2	57.9659	56.5065	53.8537	31.5968	45.813	42.2755		-0.356887	0.00515737	0.000143528
	ENSMUSG00000042625	scaffold attachment factor B2 [Source:MGI Symbol;Acc:MGI:2146808]	Safb2	42.3126	39.4408	41.1703	40.6568	34.6188	33.6431		-0.222169	0.00518729	0.000145685
	ENSMUSG00000034205	lysyl oxidase-like 2 [Source:MGI Symbol;Acc:MGI:2137913]	Loxl2	1.51629	1.56291	1.67397	0.25649	0.979168	0.683432		-1.1037	0.00518729	0.000145626
	ENSMUSG00000035042	chemokine (C-C motif) ligand 5 [Source:MGI Symbol;Acc:MGI:98262]	Ccl5	46.7733	34.2468	35.4917	109.357	55.3798	52.7041		0.656114	0.00521859	0.00014723
	ENSMUSG00000051431	G protein-coupled receptor 87 [Source:MGI Symbol;Acc:MGI:1934133]	Gpr87	2.95029	2.84478	3.22923	0.0805304	1.076	1.14441		-1.73988	0.00524252	0.000148574
	ENSMUSG00000034271	Jun dimerization protein 2 [Source:MGI Symbol;Acc:MGI:1932093]	Jdp2	18.2173	20.5141	19.9226	12.4387	16.0152	13.2887		-0.431725	0.00533082	0.000152066
	ENSMUSG00000042671	regulator of G-protein signaling 8 [Source:MGI Symbol;Acc:MGI:108408]	Rgs8	1.22136	1.31445	0.989305	0.209178	0.686256	0.325131		-1.27322	0.00533082	0.000152438
	ENSMUSG00000034684	sema domain, immunoglobulin domain (Ig), short basic domain, secreted, (semaphorin) 3F [Source:MGI Symbol;Acc:MGI:1096347]	Sema3f	1.51034	1.88905	1.67823	0.485011	0.902635	0.81848		-1.01742	0.00535149	0.000153712
	ENSMUSG00000021947	crystallin, lambda 1 [Source:MGI Symbol;Acc:MGI:1915881]	Cryl1	6.99577	5.50339	6.58683	12.846	9.00182	9.30246		0.574998	0.00549337	0.000158489
	ENSMUSG00000045092	sphingosine-1-phosphate receptor 1 [Source:MGI Symbol;Acc:MGI:1096355]	S1pr1	10.0045	5.43422	10.3027	43.6099	15.2031	18.7053		1.05462	0.00553509	0.000160399
	ENSMUSG00000043059	zinc finger protein 513 [Source:MGI Symbol;Acc:MGI:2141255]	Zfp513	21.4916	21.3005	20.0159	17.0008	14.0879	15.8232		-0.427184	0.00554425	0.000161372
	ENSMUSG00000002565	scinderin [Source:MGI Symbol;Acc:MGI:1306794]	Scin	25.788	32.3169	29.4085	2.60549	15.682	14.4821		-1.17683	0.00588004	0.000171896
	ENSMUSG00000027313	ChaC, cation transport regulator 1 [Source:MGI Symbol;Acc:MGI:1916315]	Chac1	16.0065	13.668	11.8011	4.15737	8.009	7.52179		-0.796221	0.00594283	0.000174491
	ENSMUSG00000108090	predicted gene 6637 [Source:MGI Symbol;Acc:MGI:3642957]	Gm6637	42.9086	39.7454	45.237	5.93859	25.5048	18.461		-1.15161	0.00596545	0.000175996
	ENSMUSG00000034243	golgi autoantigen, golgin subfamily b, macrogolgin 1 [Source:MGI Symbol;Acc:MGI:1099447]	Golgb1	20.3282	18.5641	18.9453	16.2451	16.143	15.2214		-0.264073	0.00596545	0.000176678
	ENSMUSG00000102418	SH2 domain containing 1B1 [Source:MGI Symbol;Acc:MGI:1349420]	Sh2d1b1	4.26511	4.80137	5.06246	0.792642	2.64772	2.55204		-1.03299	0.00599541	0.000178458
	ENSMUSG00000045010	predicted gene 4779 [Source:MGI Symbol;Acc:MGI:3646776]	Gm4779	0	0.144868	0	1.43943	0.508807	0.236755		3.73347	0.00599541	0.000179096
	ENSMUSG00000006281	telomerase associated protein 1 [Source:MGI Symbol;Acc:MGI:109573]	Tep1	24.2128	22.49	25.0039	17.0578	20.7677	18.5549		-0.303039	0.00608204	0.00018246
	ENSMUSG00000032411	transcription factor Dp 2 [Source:MGI Symbol;Acc:MGI:107167]	Tfdp2	2.25446	2.66898	2.39963	7.5821	4.20117	3.27939		0.737216	0.00613497	0.000184831
	ENSMUSG00000067235	histocompatibility 2, Q region locus 10 [Source:MGI Symbol;Acc:MGI:95929]	H2-Q10	37.6183	36.2579	40.831	15.8262	29.6002	24.5347		-0.587467	0.00615994	0.00018637
	ENSMUSG00000008305	transducin-like enhancer of split 1 [Source:MGI Symbol;Acc:MGI:104636]	Tle1	1.2456	0.825603	1.11353	1.83743	1.97455	1.55487		0.740249	0.00622332	0.000189807
	ENSMUSG00000096035	odontogenesis associated phosphoprotein [Source:MGI Symbol;Acc:MGI:2685891]	Odaph	1.74495	2.31177	1.32521	0.107841	0.27446	0.670478		-1.99944	0.00622332	0.000189876
	ENSMUSG00000016526	dual-specificity tyrosine-(Y)-phosphorylation regulated kinase 3 [Source:MGI Symbol;Acc:MGI:1330300]	Dyrk3	16.2358	15.9129	15.1072	19.4319	19.3026	20.0065		0.359217	0.00625912	0.000191768
	ENSMUSG00000074923	p21 (RAC1) activated kinase 6 [Source:MGI Symbol;Acc:MGI:2679420]	Pak6	58.3464	53.2553	58.6899	30.9573	42.61	44.917		-0.421354	0.00633327	0.000194848
	ENSMUSG00000037172	DENN domain containing 11 [Source:MGI Symbol;Acc:MGI:2444256]	Dennd11	91.2092	81.4482	83.3904	53.3098	64.6914	71.3101		-0.336326	0.00640973	0.000198019
	ENSMUSG00000057123	gap junction protein, alpha 5 [Source:MGI Symbol;Acc:MGI:95716]	Gja5	7.23196	6.17865	7.66037	1.84242	3.45397	5.25988		-0.869474	0.00654135	0.00020292
	ENSMUSG00000015766	epidermal growth factor receptor pathway substrate 8 [Source:MGI Symbol;Acc:MGI:104684]	Eps8	6.62404	6.46776	7.05932	4.1619	5.52002	5.29112		-0.356389	0.00655853	0.00020429
	ENSMUSG00000040204	PCNA clamp associated factor [Source:MGI Symbol;Acc:MGI:1915276]	Pclaf	245.13	241.689	252.835	344.861	289.022	278.856		0.238093	0.00660235	0.000206498
	ENSMUSG00000036158	prickle planar cell polarity protein 1 [Source:MGI Symbol;Acc:MGI:1916034]	Prickle1	1.70024	2.12811	1.876	3.97379	3.43267	2.62777		0.729732	0.00662401	0.000208021
	ENSMUSG00000028484	PC4 and SFRS1 interacting protein 1 [Source:MGI Symbol;Acc:MGI:2142116]	Psip1	114.93	106.698	115.483	150.557	126.672	124.493		0.192725	0.00675128	0.000216508
	ENSMUSG00000025555	FERM, RhoGEF (Arhgef) and pleckstrin domain protein 1 (chondrocyte-derived) [Source:MGI Symbol;Acc:MGI:2446173]	Farp1	19.7259	17.917	18.6368	10.9968	13.6743	14.3266		-0.433433	0.00675128	0.000217587
	ENSMUSG00000025558	dedicator of cytokinesis 9 [Source:MGI Symbol;Acc:MGI:106321]	Dock9	14.1122	13.3429	14.1146	11.3538	11.8953	11.5631		-0.234819	0.00675128	0.000217412
	ENSMUSG00000030630	fumarylacetoacetate hydrolase [Source:MGI Symbol;Acc:MGI:95482]	Fah	13.3229	14.4625	11.6498	4.88665	8.24295	8.32721		-0.646441	0.00675128	0.000216151
	ENSMUSG00000038712	MINDY lysine 48 deubiquitinase 1 [Source:MGI Symbol;Acc:MGI:1922257]	Mindy1	10.9567	13.7878	10.0344	3.92258	7.56186	6.84662		-0.665755	0.00675128	0.000216411
	ENSMUSG00000032648	muscle glycogen phosphorylase [Source:MGI Symbol;Acc:MGI:97830]	Pygm	7.67621	5.53398	5.26864	15.1565	8.48477	8.80059		0.688478	0.00675128	0.000215687
	ENSMUSG00000015944	cytosolic arginine sensor for mTORC1 subunit 2 [Source:MGI Symbol;Acc:MGI:1933384]	Castor2	8.30608	6.9762	8.0326	3.5175	6.07774	5.24154		-0.518663	0.00675128	0.000218051
	ENSMUSG00000072620	schlafen 2 [Source:MGI Symbol;Acc:MGI:1313258]	Slfn2	124.518	122.457	142.107	194.195	153.244	166.158		0.299408	0.00678507	0.000220008
	ENSMUSG00000074785	plexin C1 [Source:MGI Symbol;Acc:MGI:1890127]	Plxnc1	5.25374	4.53944	5.40875	8.55899	6.6271	6.18079		0.363785	0.00692308	0.000225367
	ENSMUSG00000029449	ras homolog family member F (in filopodia) [Source:MGI Symbol;Acc:MGI:1345629]	Rhof	143.372	138.466	142.035	100.369	118.897	122.105		-0.240822	0.00710505	0.000232198
	ENSMUSG00000028017	epidermal growth factor [Source:MGI Symbol;Acc:MGI:95290]	Egf	0.573312	0.566983	0.665109	0.469469	0.245364	0.377263		-0.955768	0.00715234	0.000234656
	ENSMUSG00000021213	aldo-keto reductase family 1, member C13 [Source:MGI Symbol;Acc:MGI:1351662]	Akr1c13	46.2848	56.2819	54.455	91.9298	70.0386	64.2433		0.401357	0.00717338	0.000236262
	ENSMUSG00000058301	UPF1 regulator of nonsense transcripts homolog (yeast) [Source:MGI Symbol;Acc:MGI:107995]	Upf1	180.719	173.039	186.323	162.764	155.991	154.769		-0.202687	0.00723984	0.000239376
	ENSMUSG00000059456	PTK2 protein tyrosine kinase 2 beta [Source:MGI Symbol;Acc:MGI:104908]	Ptk2b	130.034	134.231	131.446	100.681	108.966	115.403		-0.23301	0.00724719	0.000240544
	ENSMUSG00000114184	predicted gene 7143 [Source:MGI Symbol;Acc:MGI:3646528]	Gm7143	16.7972	18.0736	14.3287	22.7412	28.8453	21.6318		0.698538	0.00730047	0.000243244
	ENSMUSG00000102561	predicted gene, 37039 [Source:MGI Symbol;Acc:MGI:5610267]	Gm37039	0.929015	0.735009	0.852842	0.456447	0.0968064	0.270273		-2.06468	0.00736817	0.000246441
	ENSMUSG00000026421	cysteine and glycine-rich protein 1 [Source:MGI Symbol;Acc:MGI:88549]	Csrp1	186.187	198.197	197.112	263.4	225.436	220.499		0.234885	0.00737587	0.000248581
	ENSMUSG00000028602	tumor necrosis factor receptor superfamily, member 8 [Source:MGI Symbol;Acc:MGI:99908]	Tnfrsf8	134.885	123.958	130.952	39.4595	94.5147	88.7025		-0.60501	0.00737587	0.00024837
	ENSMUSG00000025224	golgi-specific brefeldin A-resistance factor 1 [Source:MGI Symbol;Acc:MGI:1861607]	Gbf1	26.4144	24.1668	26.5524	23.7083	22.2835	22.1298		-0.197859	0.00747999	0.000253045
	ENSMUSG00000000440	peroxisome proliferator activated receptor gamma [Source:MGI Symbol;Acc:MGI:97747]	Pparg	11.7658	11.1334	10.986	2.34732	7.57617	6.10295		-0.836532	0.00753763	0.000255957
	ENSMUSG00000090394	RIKEN cDNA 4930523C07 gene [Source:MGI Symbol;Acc:MGI:1914897]	4930523C07Rik	12.3865	11.6675	11.6891	20.2612	14.4763	14.2187		0.345274	0.00778188	0.000265245
	ENSMUSG00000095574	T cell receptor beta, variable 12-1 [Source:MGI Symbol;Acc:MGI:98602]	Trbv12-1	119.881	132.644	120.906	145.145	156.15	152.512		0.336805	0.00779184	0.000267177
	ENSMUSG00000038910	phospholipase C-like 2 [Source:MGI Symbol;Acc:MGI:1352756]	Plcl2	33.9357	31.5798	34.3098	52.6488	37.5949	41.5755		0.289852	0.00779184	0.000270025
	ENSMUSG00000024413	NPC intracellular cholesterol transporter 1 [Source:MGI Symbol;Acc:MGI:1097712]	Npc1	32.2005	30.1101	32.1453	27.3843	25.3913	25.6972		-0.283242	0.00779184	0.000270406
	ENSMUSG00000028073	platelet endothelial aggregation receptor 1 [Source:MGI Symbol;Acc:MGI:1920432]	Pear1	20.4952	17.5586	18.3916	9.64601	14.0308	13.5527		-0.463277	0.00779184	0.000270206
	ENSMUSG00000057135	SLP adaptor and CSK interacting membrane protein [Source:MGI Symbol;Acc:MGI:3610314]	Scimp	8.4435	7.2933	6.26435	1.75042	3.34117	3.31668		-1.09516	0.00779184	0.000270558
	ENSMUSG00000032322	proline-serine-threonine phosphatase-interacting protein 1 [Source:MGI Symbol;Acc:MGI:1321396]	Pstpip1	184.085	192.992	189.627	152.585	165.882	158.233		-0.213671	0.00782404	0.000276518
	ENSMUSG00000076432	tyrosine 3-monooxygenase/tryptophan 5-monooxygenase activation protein theta [Source:MGI Symbol;Acc:MGI:891963]	Ywhaq	81.2649	84.6567	87.7432	108.12	102.953	98.6634		0.26398	0.00782404	0.000274125
	ENSMUSG00000037362	cellular communication network factor 3 [Source:MGI Symbol;Acc:MGI:109185]	Ccn3	36.0493	38.0387	38.4121	138.681	58.9461	62.4652		0.812537	0.00782404	0.000275062
	ENSMUSG00000055044	PDZ and LIM domain 1 (elfin) [Source:MGI Symbol;Acc:MGI:1860611]	Pdlim1	41.0589	43.6224	44.3667	62.1524	51.4285	47.8184		0.240881	0.00782404	0.000274819
	ENSMUSG00000046245	paired immunoglobin-like type 2 receptor alpha [Source:MGI Symbol;Acc:MGI:2450529]	Pilra	0.933901	0.480268	1.13431	0.530223	0.194631	0.253581		-1.81836	0.00782404	0.000277649
	ENSMUSG00000001247	lipolysis stimulated lipoprotein receptor [Source:MGI Symbol;Acc:MGI:1927471]	Lsr	0.265723	0.26279	0.150114	0.754323	0.996812	0.463831		1.78791	0.00782404	0.000277669
	ENSMUSG00000029385	cyclin G2 [Source:MGI Symbol;Acc:MGI:1095734]	Ccng2	7.8462	8.26157	8.45288	22.8831	10.9528	12.2028		0.589871	0.007848	0.000279521
	ENSMUSG00000022564	glutamate receptor, ionotropic, N-methyl D-aspartate-associated protein 1 (glutamate binding) [Source:MGI Symbol;Acc:MGI:1913418]	Grina	143.017	136.468	133.211	109.019	112.717	110.584		-0.270329	0.00785307	0.000281781
	ENSMUSG00000022560	solute carrier protein 52, member 2 [Source:MGI Symbol;Acc:MGI:1289288]	Slc52a2	8.7323	9.00959	9.21994	8.13614	7.37134	6.73785		-0.324348	0.00785307	0.00028454
	ENSMUSG00000052584	stress-associated endoplasmic reticulum protein family member 2 [Source:MGI Symbol;Acc:MGI:1919911]	Serp2	4.98978	3.53653	3.05376	7.17318	6.58604	5.96787		0.891335	0.00785307	0.000282054
	ENSMUSG00000062458	predicted gene 8623 [Source:MGI Symbol;Acc:MGI:3644689]	Gm8623	1.58849	1.83278	1.68259	2.8906	6.62102	3.59434		1.43797	0.00785307	0.000283767
	ENSMUSG00000009376	met proto-oncogene [Source:MGI Symbol;Acc:MGI:96969]	Met	0.345734	0.52031	0.403367	0.0984738	0.172301	0.189503		-1.21672	0.00785307	0.000284714
	ENSMUSG00000001281	integrin beta 7 [Source:MGI Symbol;Acc:MGI:96616]	Itgb7	426.133	433.216	469.003	678.424	526.071	515.884		0.264657	0.00795985	0.000290618
	ENSMUSG00000019935	solute carrier family 17 (sodium-dependent inorganic phosphate cotransporter), member 8 [Source:MGI Symbol;Acc:MGI:3039629]	Slc17a8	4.01071	3.82132	3.83383	1.06805	2.42093	2.18184		-0.830338	0.00795985	0.000289832
	ENSMUSG00000026657	FERM domain containing 4A [Source:MGI Symbol;Acc:MGI:1919850]	Frmd4a	2.58719	2.98183	2.77866	1.32109	2.14753	2.0224		-0.459001	0.00822597	0.000301384
	ENSMUSG00000023952	GTP binding protein 2 [Source:MGI Symbol;Acc:MGI:1860138]	Gtpbp2	69.4539	60.8115	61.7678	54.712	51.8085	51.4851		-0.264129	0.00823366	0.000302717
	ENSMUSG00000052949	ring finger protein 157 [Source:MGI Symbol;Acc:MGI:2442484]	Rnf157	15.1777	12.4486	15.7776	23.9982	17.5183	19.026		0.351676	0.00835866	0.00030838
	ENSMUSG00000021143	phosphofurin acidic cluster sorting protein 2 [Source:MGI Symbol;Acc:MGI:1924399]	Pacs2	49.1797	46.7574	49.7474	46.5869	40.9665	42.4034		-0.198797	0.00842228	0.000311802
	ENSMUSG00000091742	predicted gene 5093 [Source:MGI Symbol;Acc:MGI:3644404]	Gm5093	3.10773	2.19531	2.97832	7.0286	9.25246	4.73584		1.2531	0.00843902	0.000313499
	ENSMUSG00000020798	spinster homolog 3 [Source:MGI Symbol;Acc:MGI:1924827]	Spns3	0.46105	0.352333	0.473563	0.0457625	0.174701	0.121937		-1.64092	0.00846904	0.000315695
	ENSMUSG00000031015	SWA-70 protein [Source:MGI Symbol;Acc:MGI:1298390]	Swap70	32.3319	35.0935	33.4008	15.485	25.0971	26.0681		-0.444722	0.00850155	0.000318088
	ENSMUSG00000034416	polycystic kidney disease 1 like 2 [Source:MGI Symbol;Acc:MGI:2664668]	Pkd1l2	1.87725	1.67775	1.50239	0.622483	0.825933	1.06531		-0.812278	0.00850155	0.000319078
	ENSMUSG00000020399	hepatitis A virus cellular receptor 2 [Source:MGI Symbol;Acc:MGI:2159682]	Havcr2	231.709	242.912	229.408	94.6267	173.416	175.826		-0.485708	0.00853104	0.000321274
	ENSMUSG00000029304	secreted phosphoprotein 1 [Source:MGI Symbol;Acc:MGI:98389]	Spp1	1150.03	1383.24	1105.26	178.644	669.141	681.273		-0.972401	0.00862777	0.00032675
	ENSMUSG00000042570	MIER family member 2 [Source:MGI Symbol;Acc:MGI:1917677]	Mier2	23.8715	23.3795	25.0318	20.4025	20.9965	19.4653		-0.251412	0.00862777	0.000328221
	ENSMUSG00000089736	transforming growth factor, beta receptor III-like [Source:MGI Symbol;Acc:MGI:3833469]	Tgfbr3l	2.44255	1.32468	1.97521	1.72055	0.779985	0.764082		-1.14351	0.00862777	0.000327424
	ENSMUSG00000029860	zyxin [Source:MGI Symbol;Acc:MGI:103072]	Zyx	192.376	198.471	194.117	171.999	172.813	169.195		-0.169495	0.00863016	0.00033165
	ENSMUSG00000020576	neuroblastoma amplified sequence [Source:MGI Symbol;Acc:MGI:1918419]	Nbas	17.4085	15.9926	17.2619	14.1196	14.1962	14.4349		-0.232324	0.00863016	0.000332718
	ENSMUSG00000041849	caspase recruitment domain family, member 6 [Source:MGI Symbol;Acc:MGI:3032959]	Card6	13.3764	11.4137	12.8394	18.9221	15.3384	15.3018		0.326861	0.00863016	0.000329646
	ENSMUSG00000068205	mono-ADP ribosylhydrolase 2 [Source:MGI Symbol;Acc:MGI:1920149]	Macrod2	0.0335943	0.044298	0.0158153	0.0978114	0.116688	0.0760153		1.87577	0.00863016	0.00033114
	ENSMUSG00000020707	ring finger protein 135 [Source:MGI Symbol;Acc:MGI:1919206]	Rnf135	8.19878	6.77468	8.41783	5.00586	5.22721	5.5969		-0.556346	0.00872868	0.000337631
	ENSMUSG00000023932	cell division cycle 5-like (S. pombe) [Source:MGI Symbol;Acc:MGI:1918952]	Cdc5l	124.839	128.789	126.097	146.577	141.969	138.023		0.170984	0.00872877	0.186922
	ENSMUSG00000022139	muscleblind like splicing factor 2 [Source:MGI Symbol;Acc:MGI:2145597]	Mbnl2	17.8347	15.6771	16.7333	13.6822	13.5296	13.9631		-0.265558	0.00872877	0.000339904
	ENSMUSG00000031174	retinitis pigmentosa GTPase regulator [Source:MGI Symbol;Acc:MGI:1344037]	Rpgr	1.57687	1.49646	1.34972	1.89558	2.20746	2.06978		0.591022	0.00872877	0.000340977
	ENSMUSG00000027422	ribosome binding protein 1 [Source:MGI Symbol;Acc:MGI:1932395]	Rrbp1	72.6135	73.1503	71.7521	52.3428	64.0153	60.0459		-0.226054	0.00878586	0.000344329
	ENSMUSG00000021054	sphingosine-1-phosphate phosphatase 1 [Source:MGI Symbol;Acc:MGI:2135760]	Sgpp1	38.8241	37.082	38.7864	48.8592	42.4575	42.8214		0.18739	0.00878682	0.000347732
	ENSMUSG00000047557	latexin [Source:MGI Symbol;Acc:MGI:107633]	Lxn	37.8133	43.3006	46.1613	28.2481	32.3836	34.7394		-0.390348	0.00878682	0.000346063
	ENSMUSG00000022197	PDZ domain containing 2 [Source:MGI Symbol;Acc:MGI:1922394]	Pdzd2	0.958837	1.097	1.07095	0.492652	0.770578	0.650272		-0.598444	0.00878682	0.000347592
	ENSMUSG00000099133	NA	NA	11.8825	10.912	11.9871	6.48684	3.5377	3.29229		-1.55149	0.0088266	0.000350433
	ENSMUSG00000017774	myosin IC [Source:MGI Symbol;Acc:MGI:106612]	Myo1c	6.31053	6.31022	6.32538	13.3016	9.37048	7.56452		0.500226	0.00898168	0.000357737
	ENSMUSG00000063146	CAP-GLY domain containing linker protein 2 [Source:MGI Symbol;Acc:MGI:1313136]	Clip2	5.89724	6.82251	5.51585	2.91567	4.22042	3.77658		-0.569445	0.0089947	0.000359403
	ENSMUSG00000030173	killer cell lectin-like receptor, subfamily A, member 5 [Source:MGI Symbol;Acc:MGI:101903]	Klra5	23.3668	27.355	24.0221	35.429	30.1995	37.7931		0.480629	0.00900702	0.000361046
	ENSMUSG00000023026	disco interacting protein 2 homolog B [Source:MGI Symbol;Acc:MGI:2145977]	Dip2b	31.57	29.9081	29.5974	24.7857	25.4028	26.0526		-0.214471	0.0090324	0.000363216
	ENSMUSG00000031447	lysosomal-associated membrane protein 1 [Source:MGI Symbol;Acc:MGI:96745]	Lamp1	238.369	239.92	238.472	289.893	267.768	254.967		0.16281	0.00906916	0.000369778
	ENSMUSG00000028332	hemogen [Source:MGI Symbol;Acc:MGI:2136910]	Hemgn	43.7173	43.3256	44.1807	64.0941	51.5426	52.7816		0.294697	0.00906916	0.000370483
	ENSMUSG00000052125	RIKEN cDNA F730043M19 gene [Source:MGI Symbol;Acc:MGI:2443237]	F730043M19Rik	20.8075	13.2233	16.3201	12.0836	12.0282	10.6353		-0.503347	0.00906916	0.000368847
	ENSMUSG00000093594	predicted gene 20707 [Source:MGI Symbol;Acc:MGI:5313154]	Gm20707	9.22157	8.62069	8.81211	6.81243	5.44998	6.85153		-0.503381	0.00906916	0.000367224
	ENSMUSG00000021701	polo like kinase 2 [Source:MGI Symbol;Acc:MGI:1099790]	Plk2	2.69877	3.02484	2.37766	4.15329	4.87449	3.51442		0.717015	0.00906916	0.000369821
	ENSMUSG00000092274	nuclear paraspeckle assembly transcript 1 (non-protein coding) [Source:MGI Symbol;Acc:MGI:1914211]	Neat1	17.8611	11.8492	12.2243	11.0248	8.46045	8.66036		-0.569235	0.00932021	0.000383118
	ENSMUSG00000027035	ceramide synthase 6 [Source:MGI Symbol;Acc:MGI:2442564]	Cers6	8.24594	8.55366	6.75976	3.43654	5.25852	5.25951		-0.531348	0.00932021	0.000382593
	ENSMUSG00000029254	signal transducing adaptor family member 1 [Source:MGI Symbol;Acc:MGI:1926193]	Stap1	12.6295	11.4064	11.5022	16.0605	14.1668	13.7784		0.29428	0.00935591	0.00038578
	ENSMUSG00000031862	ATPase type 13A1 [Source:MGI Symbol;Acc:MGI:2180801]	Atp13a1	78.5727	75.3579	76.9381	74.1755	67.9163	62.8658		-0.198134	0.00941061	0.000389237
	ENSMUSG00000031028	tubby bipartite transcription factor [Source:MGI Symbol;Acc:MGI:2651573]	Tub	0.151321	0.217673	0.145713	0.375492	0.415704	0.320166		1.1948	0.00943239	0.000391342
	ENSMUSG00000024778	Fas (TNF receptor superfamily member 6) [Source:MGI Symbol;Acc:MGI:95484]	Fas	4.64632	4.59503	5.1785	9.47364	6.70826	7.54577		0.57871	0.00950901	0.000395734
	ENSMUSG00000017765	solute carrier family 12, member 4 [Source:MGI Symbol;Acc:MGI:1309465]	Slc12a4	55.4356	58.3185	55.7764	38.7309	47.9835	44.027		-0.296066	0.00950954	0.000396971
	ENSMUSG00000032295	mannosidase, alpha, class 2C, member 1 [Source:MGI Symbol;Acc:MGI:1920994]	Man2c1	26.3695	23.5046	25.4523	23.93	20.3824	19.4923		-0.293086	0.0095655	0.000400528
	ENSMUSG00000028217	cadherin 17 [Source:MGI Symbol;Acc:MGI:1095414]	Cdh17	7.27566	8.29251	7.50625	2.70426	4.97366	5.6044		-0.603611	0.00963397	4.48991
	ENSMUSG00000042284	integrin alpha 1 [Source:MGI Symbol;Acc:MGI:96599]	Itga1	4.62366	4.23505	4.67185	0.447227	1.90133	2.29305		-1.3254	0.00964118	0.000406158
	ENSMUSG00000019873	receptor accessory protein 3 [Source:MGI Symbol;Acc:MGI:88930]	Reep3	17.16	15.7319	16.668	20.9847	19.1575	18.5304		0.220288	0.00965455	0.000409186
	ENSMUSG00000095710	predicted pseudogene 8871 [Source:MGI Symbol;Acc:MGI:3645635]	Gm8871	4.30353	3.68855	3.9169	0.626496	2.09273	1.94755		-1.07931	0.00965455	0.000408896
	ENSMUSG00000004707	lymphocyte antigen 9 [Source:MGI Symbol;Acc:MGI:96885]	Ly9	82.6196	82.6397	89.7692	123.667	99.9137	97.1122		0.237435	0.0096688	0.000411025
	ENSMUSG00000026832	cytohesin 1 interacting protein [Source:MGI Symbol;Acc:MGI:2183535]	Cytip	72.2808	66.8449	74.26	109.865	84.2723	83.5717		0.27624	0.00988112	0.000421312
	ENSMUSG00000051998	lymphocyte transmembrane adaptor 1 [Source:MGI Symbol;Acc:MGI:2443362]	Lax1	270.853	246.11	244.43	195.349	206.287	209.235		-0.261719	0.00988131	0.000429861
	ENSMUSG00000006736	tetraspanin 31 [Source:MGI Symbol;Acc:MGI:1914375]	Tspan31	146.906	155.956	151.353	94.3645	123.353	123.933		-0.312978	0.00988131	0.000426235
	ENSMUSG00000082536	predicted gene 13456 [Source:MGI Symbol;Acc:MGI:3651389]	Gm13456	58.8567	57.4543	54.4011	77.2799	66.9702	64.9486		0.278959	0.00988131	0.000428762
	ENSMUSG00000022272	myosin X [Source:MGI Symbol;Acc:MGI:107716]	Myo10	64.1925	71.1868	70.8579	22.6112	47.7349	43.4946		-0.684933	0.00988131	0.000426457
	ENSMUSG00000024654	asparaginase like 1 [Source:MGI Symbol;Acc:MGI:1913764]	Asrgl1	24.6602	23.591	26.5194	34.0225	29.3917	29.4889		0.246978	0.00988131	0.00043015
	ENSMUSG00000031441	ATPase, class VI, type 11A [Source:MGI Symbol;Acc:MGI:1354735]	Atp11a	13.9862	12.4087	13.3782	11.9587	10.6474	11.3845		-0.242394	0.00988131	0.000427571
	ENSMUSG00000032558	nephronophthisis 3 (adolescent) [Source:MGI Symbol;Acc:MGI:1921275]	Nphp3	2.96556	2.70855	2.73472	1.52371	1.99955	1.74242		-0.574236	0.00988131	0.000427456
	ENSMUSG00000022094	solute carrier family 39 (zinc transporter), member 14 [Source:MGI Symbol;Acc:MGI:2384851]	Slc39a14	45.7344	43.9203	45.8244	30.964	38.5358	38.1862		-0.253735	0.00990186	0.000432309
	ENSMUSG00000000278	serine carboxypeptidase 1 [Source:MGI Symbol;Acc:MGI:1921867]	Scpep1	77.7791	75.7774	77.003	93.6961	86.899	86.7426		0.203651	0.00995643	0.000442317
	ENSMUSG00000076617	immunoglobulin heavy constant mu [Source:MGI Symbol;Acc:MGI:96448]	Ighm	60.9589	38.1932	53.4193	187.107	77.4881	73.6559		0.71166	0.00995643	0.000438524
	ENSMUSG00000020827	misshapen-like kinase 1 (zebrafish) [Source:MGI Symbol;Acc:MGI:1355329]	Mink1	43.7592	37.7191	38.3441	38.7353	32.338	31.8576		-0.247734	0.00995643	0.000437296
	ENSMUSG00000054874	pecanex homolog 3 [Source:MGI Symbol;Acc:MGI:1861733]	Pcnx3	35.9195	33.0332	37.177	34.0801	30.4104	29.7581		-0.219395	0.00995643	0.000442257
	ENSMUSG00000032946	RAS, guanyl releasing protein 2 [Source:MGI Symbol;Acc:MGI:1333849]	Rasgrp2	21.2144	18.5559	21.9445	45.4498	27.8948	24.8118		0.425093	0.00995643	0.000442052
	ENSMUSG00000029179	zinc finger, CCHC domain containing 4 [Source:MGI Symbol;Acc:MGI:1926046]	Zcchc4	8.92976	7.20743	7.49519	7.49449	5.81707	5.97852		-0.333394	0.00995643	0.000439381
	ENSMUSG00000050410	transcription factor 19 [Source:MGI Symbol;Acc:MGI:103180]	Tcf19	100.92	97.6924	109.963	157.007	122.037	119.601		0.254988	0.00997392	0.000448187
	ENSMUSG00000040661	RAD54 like 2 (S. cerevisiae) [Source:MGI Symbol;Acc:MGI:1933196]	Rad54l2	55.9487	50.6502	52.7885	41.6619	45.66	44.8206		-0.220874	0.00997392	0.000448169
	ENSMUSG00000002250	peroxisome proliferator activator receptor delta [Source:MGI Symbol;Acc:MGI:101884]	Ppard	12.7351	12.5186	14.1567	10.2649	10.6451	10.6962		-0.325337	0.00997392	0.000444855
	ENSMUSG00000117679	amyloid beta (A4) precursor protein-binding, family B, member 3 [Source:MGI Symbol;Acc:MGI:108404]	Apbb3	13.8768	10.5718	11.6278	10.3666	7.95653	8.14504		-0.497476	0.00997392	0.000447772
	ENSMUSG00000109336	sterile alpha motif domain containing 4B [Source:MGI Symbol;Acc:MGI:2448542]	Samd4b	40.198	37.4574	37.8773	32.6675	34.1125	31.1232		-0.211026	0.0101689	0.000458245
	ENSMUSG00000067750	KH domain containing 1A [Source:MGI Symbol;Acc:MGI:2676610]	Khdc1a	12.8966	16.546	15.0553	2.98108	9.68551	8.50661		-0.844432	0.0102088	0.000461348
	ENSMUSG00000040061	phospholipase C, beta 2 [Source:MGI Symbol;Acc:MGI:107465]	Plcb2	23.7089	23.2223	24.1311	21.0719	19.6915	18.4951		-0.287569	0.0102589	0.000465313
	ENSMUSG00000042632	phospholipase A2, group VI [Source:MGI Symbol;Acc:MGI:1859152]	Pla2g6	17.015	12.3525	13.5603	10.5759	10.4478	10.6912		-0.377978	0.0102589	0.000466234
	ENSMUSG00000068735	transformation related protein 53 inducible protein 11 [Source:MGI Symbol;Acc:MGI:2670995]	Trp53i11	195.637	191.064	189.422	180.267	172.763	162.689		-0.160606	0.0104135	0.000475916
	ENSMUSG00000024331	desmocollin 2 [Source:MGI Symbol;Acc:MGI:103221]	Dsc2	0.874968	1.1898	0.849566	0.0477658	0.273523	0.403036		-1.66312	0.0104135	0.000475893
	ENSMUSG00000019857	anti-silencing function 1A histone chaperone [Source:MGI Symbol;Acc:MGI:1913653]	Asf1a	21.8613	22.0907	21.5767	27.3331	26.5824	24.0307		0.248481	0.010497	0.000482415
	ENSMUSG00000101801	RIKEN cDNA 1700020G17 gene [Source:MGI Symbol;Acc:MGI:1922880]	1700020G17Rik	1.48589	1.08278	0.994049	0	0	0.60671		-3.05756	0.010497	0.00048193
	ENSMUSG00000046675	transmembrane protein 251 [Source:MGI Symbol;Acc:MGI:2443862]	Tmem251	24.2722	24.8519	25.7827	28.6721	30.5795	28.8239		0.247131	0.0105567	0.000486504
	ENSMUSG00000053964	lectin, galactose binding, soluble 4 [Source:MGI Symbol;Acc:MGI:107536]	Lgals4	10.122	8.1857	8.09839	6.31511	4.62423	5.36722		-0.714764	0.0105975	0.00049032
	ENSMUSG00000003992	single-stranded DNA binding protein 2 [Source:MGI Symbol;Acc:MGI:1914220]	Ssbp2	5.49323	4.98941	5.75739	9.45422	7.38111	7.02328		0.435973	0.0105975	0.000491088
	ENSMUSG00000032177	phosphodiesterase 4A, cAMP specific [Source:MGI Symbol;Acc:MGI:99558]	Pde4a	5.97131	5.30889	5.59031	2.37078	4.08534	3.50949		-0.606767	0.0106059	0.000492832
	ENSMUSG00000032420	5' nucleotidase, ecto [Source:MGI Symbol;Acc:MGI:99782]	Nt5e	11.5672	6.99375	9.15375	21.889	11.6059	14.8348		0.61813	0.0106521	0.000496342
	ENSMUSG00000082465	ribosomal protein S6, pseudogene 3 [Source:MGI Symbol;Acc:MGI:3643565]	Rps6-ps3	10.9274	11.2634	10.2162	17.9803	17.481	16.1191		0.696212	0.0106593	0.000499398
	ENSMUSG00000028041	a disintegrin and metallopeptidase domain 15 (metargidin) [Source:MGI Symbol;Acc:MGI:1333882]	Adam15	7.64525	7.33794	7.91907	5.59906	6.12665	6.08418		-0.33497	0.0106593	0.000498746
	ENSMUSG00000114652	predicted gene, 41043 [Source:MGI Symbol;Acc:MGI:5623928]	Gm41043	0.496296	0.531719	0.525695	0.180623	0.0430964	0.240641		-2.00592	0.0106832	0.00050188
	ENSMUSG00000053617	SH3 and PX domains 2A [Source:MGI Symbol;Acc:MGI:1298393]	Sh3pxd2a	6.30271	6.28237	6.58818	2.29383	4.79343	4.31608		-0.580484	0.0106975	0.000503919
	ENSMUSG00000004565	patatin-like phospholipase domain containing 6 [Source:MGI Symbol;Acc:MGI:1354723]	Pnpla6	8.62929	6.90963	7.5225	6.17285	5.90371	5.51726		-0.380664	0.0109212	0.00051585
	ENSMUSG00000017670	engulfment and cell motility 2 [Source:MGI Symbol;Acc:MGI:2153045]	Elmo2	123.291	123.766	124.964	87.2661	101.169	102.784		-0.290955	0.0109735	0.000523923
	ENSMUSG00000024063	limb-bud and heart [Source:MGI Symbol;Acc:MGI:1925139]	Lbh	54.2651	56.4738	61.5147	83.4968	67.6305	69.8044		0.269368	0.0109735	0.000521294
	ENSMUSG00000039497	dermatan sulfate epimerase [Source:MGI Symbol;Acc:MGI:2443455]	Dse	12.702	11.5302	12.9961	16.9052	14.7575	15.7792		0.305667	0.0109735	0.00052258
	ENSMUSG00000028497	3-hydroxyacyl-CoA dehydratase 4 [Source:MGI Symbol;Acc:MGI:1914025]	Hacd4	0.187941	0.304146	0.349889	0.0186545	0.106822	0.0828434		-1.74068	0.0109735	0.000523709
	ENSMUSG00000054717	high mobility group box 2 [Source:MGI Symbol;Acc:MGI:96157]	Hmgb2	608.478	596.706	645.5	905.293	733.908	700.628		0.24929	0.0111448	0.000533523
	ENSMUSG00000028793	ring finger protein 19B [Source:MGI Symbol;Acc:MGI:1922484]	Rnf19b	194.889	195.679	202.616	257.194	220.294	220.173		0.183455	0.0111577	0.000535569
	ENSMUSG00000032020	ubiquitin associated and SH3 domain containing, B [Source:MGI Symbol;Acc:MGI:1920078]	Ubash3b	51.0187	46.9339	48.589	31.172	38.8133	41.9271		-0.292776	0.0112612	0.000541972
	ENSMUSG00000020300	cytoplasmic polyadenylation element binding protein 4 [Source:MGI Symbol;Acc:MGI:1914829]	Cpeb4	67.8191	58.4671	59.2431	36.5089	48.3281	50.8457		-0.322123	0.0112664	0.000543688
	ENSMUSG00000046731	potassium channel tetramerisation domain containing 11 [Source:MGI Symbol;Acc:MGI:2448712]	Kctd11	11.7411	11.793	9.71615	6.3696	7.68489	7.43644		-0.476256	0.0112664	0.000545101
	ENSMUSG00000054520	SH3-domain binding protein 2 [Source:MGI Symbol;Acc:MGI:1346349]	Sh3bp2	71.284	70.3378	70.4502	61.0201	61.4569	56.6725		-0.234351	0.0112847	0.000547424
	ENSMUSG00000039218	serine/arginine repetitive matrix 2 [Source:MGI Symbol;Acc:MGI:1923206]	Srrm2	242.123	217.538	233.695	226.73	210.695	186.151		-0.185414	0.0113585	0.000555072
	ENSMUSG00000023045	sterol O-acyltransferase 2 [Source:MGI Symbol;Acc:MGI:1332226]	Soat2	52.3165	40.3389	46.9256	37.1313	36.1987	37.6836		-0.311615	0.0113585	0.000555355
	ENSMUSG00000026581	selectin, lymphocyte [Source:MGI Symbol;Acc:MGI:98279]	Sell	6.4833	4.48049	8.54973	58.1218	12.3314	17.1761		1.24104	0.0113585	0.000554797
	ENSMUSG00000026107	nucleic acid binding protein 1 [Source:MGI Symbol;Acc:MGI:1923258]	Nabp1	73.8927	51.8928	62.6351	41.6738	45.4773	50.3708		-0.380889	0.0114104	0.000559349
	ENSMUSG00000027692	TRAF2 and NCK interacting kinase [Source:MGI Symbol;Acc:MGI:1916264]	Tnik	12.7271	11.6335	11.9465	9.68004	10.561	10.0954		-0.211205	0.0114306	0.000561798
	ENSMUSG00000023800	T cell lymphoma invasion and metastasis 2 [Source:MGI Symbol;Acc:MGI:1344338]	Tiam2	0.35333	0.528625	0.409447	0.138484	0.16993	0.245998		-1.05929	0.0114719	0.000565292
	ENSMUSG00000064351	mitochondrially encoded cytochrome c oxidase I [Source:MGI Symbol;Acc:MGI:102504]	mt-Co1	14151.3	11059.9	12052.3	11573.6	10331.6	9453.87		-0.266482	0.0114945	0.000567874
	ENSMUSG00000022033	PDZ binding kinase [Source:MGI Symbol;Acc:MGI:1289156]	Pbk	89.5212	92.4849	98.7611	123.989	109.805	107.25		0.223681	0.0115259	0.000570898
	ENSMUSG00000027115	kinesin family member 18A [Source:MGI Symbol;Acc:MGI:2446977]	Kif18a	12.656	12.7717	13.3228	17.1638	14.6682	14.9144		0.217615	0.011552	0.000574658
	ENSMUSG00000039145	calcium/calmodulin-dependent protein kinase ID [Source:MGI Symbol;Acc:MGI:2442190]	Camk1d	11.0503	9.68336	10.7227	15.8831	12.859	11.9519		0.286434	0.011552	0.00057514
	ENSMUSG00000061589	DOT1-like, histone H3 methyltransferase (S. cerevisiae) [Source:MGI Symbol;Acc:MGI:2143886]	Dot1l	83.6189	81.4894	83.853	73.7504	74.836	68.6673		-0.191782	0.0115819	0.000578423
	ENSMUSG00000001444	T-box 21 [Source:MGI Symbol;Acc:MGI:1888984]	Tbx21	40.9202	39.4591	41.5751	76.236	51.1972	49.4003		0.372213	0.0115819	0.000579585
	ENSMUSG00000036002	family with sequence similarity 214, member B [Source:MGI Symbol;Acc:MGI:2441854]	Fam214b	16.7456	18.1367	16.7407	6.4709	12.9342	11.3592		-0.555591	0.0118494	0.000594484
	ENSMUSG00000015120	ubiquitin-conjugating enzyme E2I [Source:MGI Symbol;Acc:MGI:107365]	Ube2i	94.0901	87.4001	90.1933	84.657	81.0815	75.3546		-0.178706	0.0118662	0.000596843
	ENSMUSG00000000751	replication protein A1 [Source:MGI Symbol;Acc:MGI:1915525]	Rpa1	192.411	193.93	201.354	246.683	216.068	217.836		0.169973	0.0119047	0.000608998
	ENSMUSG00000000530	activin A receptor, type II-like 1 [Source:MGI Symbol;Acc:MGI:1338946]	Acvrl1	50.7189	67.1018	52.1562	6.38276	27.0176	35.8254		-1.02899	0.0119047	0.000606729
	ENSMUSG00000021236	ectonucleoside triphosphate diphosphohydrolase 5 [Source:MGI Symbol;Acc:MGI:1321385]	Entpd5	30.5252	30.3773	31.8138	42.8448	34.9353	34.9771		0.209415	0.0119047	0.000602302
	ENSMUSG00000042213	zinc finger, AN1-type domain 4 [Source:MGI Symbol;Acc:MGI:1914742]	Zfand4	11.5955	12.2593	12.7308	9.01291	9.11968	10.1202		-0.36025	0.0119047	0.000601022
	ENSMUSG00000029413	N-acylethanolamine acid amidase [Source:MGI Symbol;Acc:MGI:1914361]	Naaa	6.08017	7.27089	6.59369	5.01275	4.81645	4.87341		-0.426393	0.0119047	0.000607
	ENSMUSG00000001995	signal-induced proliferation-associated 1 like 2 [Source:MGI Symbol;Acc:MGI:2676970]	Sipa1l2	6.76953	6.55237	5.82289	4.18047	4.69021	4.76059		-0.378684	0.0119047	0.000609418
	ENSMUSG00000026479	laminin, gamma 2 [Source:MGI Symbol;Acc:MGI:99913]	Lamc2	0.258458	0.227204	0.283908	0.0627093	0.134661	0.0974705		-1.20831	0.0119047	0.000607733
	ENSMUSG00000028967	ERBB receptor feedback inhibitor 1 [Source:MGI Symbol;Acc:MGI:1921405]	Errfi1	66.5447	68.2004	60.1669	23.0105	42.4445	49.969		-0.54088	0.0119296	0.000612215
	ENSMUSG00000056671	PRELI domain containing 2 [Source:MGI Symbol;Acc:MGI:1924869]	Prelid2	157.476	161.956	159.902	183.843	194.294	176.147		0.230126	0.011998	0.000618454
	ENSMUSG00000039768	DnaJ heat shock protein family (Hsp40) member C11 [Source:MGI Symbol;Acc:MGI:2443386]	Dnajc11	33.2194	31.3026	33.7789	28.5509	28.9271	28.7969		-0.179891	0.011998	0.000618786
	ENSMUSG00000102973	RIKEN cDNA E430014B02 gene [Source:MGI Symbol;Acc:MGI:2445017]	E430014B02Rik	0.146299	0.0723422	0.0516553	0.239601	0.266785	0.248278		1.72276	0.0120618	0.000623617
	ENSMUSG00000070972	DnaJ heat shock protein family (Hsp40) member C25 [Source:MGI Symbol;Acc:MGI:1919679]	Dnajc25	8.25953	7.9673	8.1835	6.15999	6.01145	6.38308		-0.378829	0.0120913	0.000626684
	ENSMUSG00000059363	frataxin [Source:MGI Symbol;Acc:MGI:1096879]	Fxn	28.5061	25.8005	24.8943	34.0091	31.8135	29.9337		0.293715	0.0121301	0.000630246
	ENSMUSG00000027712	annexin A5 [Source:MGI Symbol;Acc:MGI:106008]	Anxa5	228.652	247.97	243.802	144.257	197.446	202.206		-0.301502	0.0121321	0.000632613
	ENSMUSG00000025104	HDGF like 3 [Source:MGI Symbol;Acc:MGI:1352760]	Hdgfl3	18.071	16.4289	19.3586	31.7609	22.6746	21.6511		0.33785	0.0121321	0.000633447
	ENSMUSG00000002546	golgi autoantigen, golgin subfamily a, 2 [Source:MGI Symbol;Acc:MGI:2139395]	Golga2	53.4966	54.5043	56.1692	41.3837	47.8941	47.2989		-0.215327	0.0122891	0.00065059
	ENSMUSG00000025959	Kruppel-like factor 7 (ubiquitous) [Source:MGI Symbol;Acc:MGI:1935151]	Klf7	31.8423	28.3881	30.0645	27.7759	27.012	24.9592		-0.181067	0.0122891	0.000651055
	ENSMUSG00000059183	mitochondrial methionyl-tRNA formyltransferase [Source:MGI Symbol;Acc:MGI:1916856]	Mtfmt	26.2442	21.863	25.1561	22.3785	20.9959	18.9575		-0.266325	0.0122891	0.000650541
	ENSMUSG00000085531	solute carrier family 36 (proton/amino acid symporter), member 3, opposite strand [Source:MGI Symbol;Acc:MGI:3651340]	Slc36a3os	7.32537	6.80546	5.17288	12.603	10.6403	9.68694		0.835802	0.0122891	0.000647404
	ENSMUSG00000025816	Sec61, alpha subunit 2 (S. cerevisiae) [Source:MGI Symbol;Acc:MGI:1931071]	Sec61a2	10.1999	9.28829	9.69872	7.44272	8.07667	6.68396		-0.376519	0.0122891	0.000643651
	ENSMUSG00000050122	von Willebrand factor A domain containing 3B [Source:MGI Symbol;Acc:MGI:1918103]	Vwa3b	0.0193545	0.0574225	0.0136673	0.0633954	0.181512	0.131383		2.41331	0.0122891	0.000645588
	ENSMUSG00000022051	BCL2/adenovirus E1B interacting protein 3-like [Source:MGI Symbol;Acc:MGI:1332659]	Bnip3l	38.8855	39.3733	38.2741	48.3349	47.1902	41.8281		0.233844	0.0123102	0.000656892
	ENSMUSG00000034612	carbohydrate sulfotransferase 11 [Source:MGI Symbol;Acc:MGI:1927166]	Chst11	37.3629	40.6062	40.5274	21.138	31.2946	31.4731		-0.381997	0.0123102	0.000655879
	ENSMUSG00000107458	predicted gene, 44040 [Source:MGI Symbol;Acc:MGI:5690432]	Gm44040	20.968	23.8785	17.0502	7.16868	10.3729	10.8857		-0.86903	0.0123102	0.000655674
	ENSMUSG00000028618	transmembrane protein 59 [Source:MGI Symbol;Acc:MGI:1929278]	Tmem59	92.3553	91.1138	102.762	136.696	112.033	108.998		0.224658	0.0123534	0.000664693
	ENSMUSG00000026308	kelch-like 30 [Source:MGI Symbol;Acc:MGI:1918038]	Klhl30	60.088	57.8356	55.1506	25.3774	37.2255	44.6447		-0.529568	0.0123534	0.000666592
	ENSMUSG00000000386	MX dynamin-like GTPase 1 [Source:MGI Symbol;Acc:MGI:97243]	Mx1	43.7018	39.3288	34.9306	20.3446	30.0625	27.0899		-0.422899	0.0123534	0.000667081
	ENSMUSG00000117871	predicted gene, 50287 [Source:MGI Symbol;Acc:MGI:6303125]	Gm50287	1.06579	0.549929	0.75262	0.354159	0.241433	0.224685		-1.52056	0.0123534	0.000663478
	ENSMUSG00000030088	aldehyde dehydrogenase 1 family, member L1 [Source:MGI Symbol;Acc:MGI:1340024]	Aldh1l1	0.715687	1.08696	0.667835	0.0558149	0.266346	0.148722		-1.96244	0.0123534	0.000664865
	ENSMUSG00000021706	zinc finger, FYVE domain containing 16 [Source:MGI Symbol;Acc:MGI:2145181]	Zfyve16	9.89355	8.656	9.54158	7.83016	7.50701	7.85557		-0.273314	0.0124848	0.000675769
	ENSMUSG00000031749	ST3 beta-galactoside alpha-2,3-sialyltransferase 2 [Source:MGI Symbol;Acc:MGI:99427]	St3gal2	3.8927	3.73651	4.23649	11.5005	8.23195	4.88521		0.754483	0.0126019	0.000684178
	ENSMUSG00000090273	proline rich 22 [Source:MGI Symbol;Acc:MGI:2685392]	Prr22	2.0623	1.57336	1.95562	1.60835	0.736796	0.914246		-1.06463	0.0126019	0.000685323
	ENSMUSG00000030766	Rho GTPase activating protein 17 [Source:MGI Symbol;Acc:MGI:1917747]	Arhgap17	20.6045	19.336	21.1235	18.1445	16.0844	18.1918		-0.245014	0.0126444	0.000689253
	ENSMUSG00000028270	guanylate binding protein 2 [Source:MGI Symbol;Acc:MGI:102772]	Gbp2	154.289	147.414	165.713	260.726	201.028	200.83		0.394116	0.0127799	0.000698267
	ENSMUSG00000032440	transforming growth factor, beta receptor II [Source:MGI Symbol;Acc:MGI:98729]	Tgfbr2	116.192	110.252	115.433	70.9506	91.6329	97.2809		-0.300898	0.0127955	0.000700752
	ENSMUSG00000076281	NA	NA	368.566	244.334	328.908	329.447	540.214	738.398		0.918446	0.0128177	0.000703609
	ENSMUSG00000036306	leucine zipper, putative tumor suppressor 1 [Source:MGI Symbol;Acc:MGI:2684762]	Lzts1	6.09224	6.76343	5.08102	1.46374	3.96106	3.07739		-0.772395	0.0129509	0.000712573
	ENSMUSG00000006127	inositol polyphosphate 5-phosphatase K [Source:MGI Symbol;Acc:MGI:1194899]	Inpp5k	18.3785	19.3515	18.215	27.7891	21.4819	21.2229		0.262394	0.0130002	0.000718602
	ENSMUSG00000020520	polypeptide N-acetylgalactosaminyltransferase 10 [Source:MGI Symbol;Acc:MGI:1890480]	Galnt10	22.9699	23.1948	23.8865	14.7475	17.5029	18.8784		-0.385663	0.0130002	0.000718133
	ENSMUSG00000040751	linker for activation of T cells family, member 2 [Source:MGI Symbol;Acc:MGI:1926479]	Lat2	177.175	193.556	177.61	46.4498	127.166	118.857		-0.676145	0.0130257	0.000724999
	ENSMUSG00000058715	Fc receptor, IgE, high affinity I, gamma polypeptide [Source:MGI Symbol;Acc:MGI:95496]	Fcer1g	110.94	140.671	105.294	22.3509	72.527	66.5992		-0.841708	0.0130257	0.000723582
	ENSMUSG00000021959	large tumor suppressor 2 [Source:MGI Symbol;Acc:MGI:1354386]	Lats2	2.21886	1.60483	1.91765	3.16386	2.98505	2.32836		0.519918	0.0130257	0.000722505
	ENSMUSG00000040749	siah E3 ubiquitin protein ligase 1B [Source:MGI Symbol;Acc:MGI:108063]	Siah1b	15.6885	16.054	16.6948	20.9356	20.7755	19.0173		0.308397	0.0131769	0.0007351
	ENSMUSG00000112980	RIKEN cDNA D430020J02 gene [Source:MGI Symbol;Acc:MGI:2442237]	D430020J02Rik	13.8548	10.4025	12.5552	10.4132	7.85248	8.79213		-0.51812	0.0132108	0.000738675
	ENSMUSG00000029135	fos-like antigen 2 [Source:MGI Symbol;Acc:MGI:102858]	Fosl2	47.5792	42.2424	43.0127	33.2131	34.9911	38.1375		-0.259981	0.0132804	0.00074596
	ENSMUSG00000031808	solute carrier family 27 (fatty acid transporter), member 1 [Source:MGI Symbol;Acc:MGI:1347098]	Slc27a1	9.29772	6.417	7.71116	3.58543	5.62759	5.46741		-0.512886	0.0132804	0.000744545
	ENSMUSG00000066152	solute carrier family 31, member 2 [Source:MGI Symbol;Acc:MGI:1333844]	Slc31a2	7.43795	5.95206	7.77832	5.88925	4.31903	4.68014		-0.639996	0.0132821	0.000748791
	ENSMUSG00000026989	death associated protein-like 1 [Source:MGI Symbol;Acc:MGI:1923997]	Dapl1	1.02	0.168124	0	3.71222	1.06287	1.48371		3.17563	0.0132821	0.000749443
	ENSMUSG00000081683	frizzled class receptor 10 [Source:MGI Symbol;Acc:MGI:2136761]	Fzd10	0.887924	0.561999	0.576854	0.0775569	0.0740197	0.27554		-2.04164	0.0133058	0.000752483
	ENSMUSG00000022148	FYN binding protein [Source:MGI Symbol;Acc:MGI:1346327]	Fyb	84.4715	80.6131	83.1017	76.6386	69.9485	71.8532		-0.196707	0.0133177	0.000754856
	ENSMUSG00000075254	heart development protein with EGF-like domains 1 [Source:MGI Symbol;Acc:MGI:1924696]	Heg1	9.54965	7.48005	9.34365	14.6547	10.9055	10.7646		0.337695	0.0133363	0.000758282
	ENSMUSG00000020231	disco interacting protein 2 homolog A [Source:MGI Symbol;Acc:MGI:2385920]	Dip2a	10.8334	8.57386	10.8352	7.73209	7.87726	8.27101		-0.340475	0.0133363	0.000759316
	ENSMUSG00000044055	otospiralin [Source:MGI Symbol;Acc:MGI:2672814]	Otos	5.84267	5.44482	4.86639	2.658	3.12218	3.26879		-0.695452	0.0133484	0.000761706
	ENSMUSG00000025557	solute carrier family 15 (oligopeptide transporter), member 1 [Source:MGI Symbol;Acc:MGI:1861376]	Slc15a1	1.32325	0.864641	1.5685	4.43749	2.31453	2.22272		0.865502	0.0133594	0.000765744
	ENSMUSG00000075225	coiled-coil domain containing 162 [Source:MGI Symbol;Acc:MGI:1923223]	Ccdc162	0.566001	0.514973	0.591536	0.407864	0.36567	0.296394		-0.726442	0.0133594	0.0007655
	ENSMUSG00000036880	acetyl-Coenzyme A acyltransferase 2 (mitochondrial 3-oxoacyl-Coenzyme A thiolase) [Source:MGI Symbol;Acc:MGI:1098623]	Acaa2	65.9383	72.5147	69.5218	96.9334	81.2458	77.5296		0.240206	0.0133647	0.000767754
	ENSMUSG00000022440	C1q and tumor necrosis factor related protein 6 [Source:MGI Symbol;Acc:MGI:1919959]	C1qtnf6	30.9295	30.1656	28.8098	16.8848	23.8605	21.1282		-0.41252	0.0134111	0.000772134
	ENSMUSG00000041707	transmembrane protein 273 [Source:MGI Symbol;Acc:MGI:1916319]	Tmem273	10.6507	9.8214	10.8242	4.47862	7.57386	6.97868		-0.58388	0.0134329	0.000775105
	ENSMUSG00000034163	zinc finger, C3H1-type containing [Source:MGI Symbol;Acc:MGI:2446143]	Zfc3h1	50.7875	39.5793	43.9446	41.1107	36.5689	35.216		-0.264848	0.0134354	0.000778679
	ENSMUSG00000038764	protein tyrosine phosphatase, non-receptor type 3 [Source:MGI Symbol;Acc:MGI:105307]	Ptpn3	19.855	17.6801	18.7394	5.85052	12.8458	13.9961		-0.580242	0.0134354	0.00077842
	ENSMUSG00000041481	serine (or cysteine) peptidase inhibitor, clade A, member 3G [Source:MGI Symbol;Acc:MGI:105046]	Serpina3g	37.5079	32.5928	36.9418	61.129	46.3414	46.4237		0.418954	0.0135392	0.000786422
	ENSMUSG00000064367	mitochondrially encoded NADH dehydrogenase 5 [Source:MGI Symbol;Acc:MGI:102496]	mt-Nd5	2941.13	2328.37	2450.28	2554.53	2133.42	1939.52		-0.258112	0.0135558	0.000794904
	ENSMUSG00000017631	active BCR-related gene [Source:MGI Symbol;Acc:MGI:107771]	Abr	56.2951	54.2798	56.1908	46.4545	47.6787	48.6146		-0.200119	0.0135558	0.000797767
	ENSMUSG00000031832	TATA-box binding protein associated factor, RNA polymerase I, C [Source:MGI Symbol;Acc:MGI:109576]	Taf1c	34.0668	33.102	37.9533	34.1256	28.4334	27.9685		-0.307956	0.0135558	0.000792749
	ENSMUSG00000025076	caspase 7 [Source:MGI Symbol;Acc:MGI:109383]	Casp7	19.5573	19.134	21.0676	29.1961	23.357	23.8215		0.261868	0.0135558	0.000797227
	ENSMUSG00000034413	neuralized E3 ubiquitin protein ligase 1B [Source:MGI Symbol;Acc:MGI:3643092]	Neurl1b	5.25097	4.18326	4.50627	10.5307	6.32663	5.53413		0.473247	0.0135558	0.000789436
	ENSMUSG00000022123	sciellin [Source:MGI Symbol;Acc:MGI:1891228]	Scel	5.71847	5.47292	4.4615	1.6616	3.12358	3.04106		-0.724292	0.0135558	0.000795574
	ENSMUSG00000027763	muscleblind like splicing factor 1 [Source:MGI Symbol;Acc:MGI:1928482]	Mbnl1	145.291	125.488	137.312	212.427	152.658	154.143		0.235293	0.0137108	0.00080864
	ENSMUSG00000045409	tripartite motif-containing 39 [Source:MGI Symbol;Acc:MGI:1890659]	Trim39	27.4712	20.1191	21.6899	19.4027	17.1189	15.7299		-0.405838	0.0137293	0.000811488
	ENSMUSG00000015749	acidic (leucine-rich) nuclear phosphoprotein 32 family, member E [Source:MGI Symbol;Acc:MGI:1913721]	Anp32e	296.959	285.838	311.807	374.909	334.84	333.146		0.178498	0.0141067	0.000846338
	ENSMUSG00000038366	LIM and SH3 protein 1 [Source:MGI Symbol;Acc:MGI:109656]	Lasp1	347.037	353.717	344.559	274.394	298.27	303.758		-0.203248	0.0141067	0.000849821
	ENSMUSG00000022186	3-oxoacid CoA transferase 1 [Source:MGI Symbol;Acc:MGI:1914291]	Oxct1	148.023	148.424	147.563	189.641	160.224	167.257		0.182956	0.0141067	0.000849795
	ENSMUSG00000051124	GTPase, IMAP family member 9 [Source:MGI Symbol;Acc:MGI:3511744]	Gimap9	117.188	122.985	127.183	168.628	144.089	135.185		0.2156	0.0141067	0.000843611
	ENSMUSG00000077565	predicted gene, 23201 [Source:MGI Symbol;Acc:MGI:5452978]	Gm23201	159.527	87.2203	132.8	62.307	72.9801	67.9174		-0.830917	0.0141067	0.000849996
	ENSMUSG00000031153	GRIP1 associated protein 1 [Source:MGI Symbol;Acc:MGI:1859616]	Gripap1	34.2598	32.6783	32.8744	28.5182	27.8734	27.9336		-0.226278	0.0141067	0.000845161
	ENSMUSG00000036565	tweety family member 3 [Source:MGI Symbol;Acc:MGI:1925589]	Ttyh3	16.5509	16.3482	16.9506	25.3878	20.4208	18.9846		0.289437	0.0141067	0.000837204
	ENSMUSG00000000673	3-hydroxyanthranilate 3,4-dioxygenase [Source:MGI Symbol;Acc:MGI:1349444]	Haao	20.196	19.1683	19.1895	14.9427	16.5995	15.998		-0.243108	0.0141067	0.000839834
	ENSMUSG00000067586	sphingosine-1-phosphate receptor 3 [Source:MGI Symbol;Acc:MGI:1339365]	S1pr3	1.47424	1.48354	1.51591	0.451822	0.997184	0.852765		-0.767496	0.0141067	0.000846929
	ENSMUSG00000013707	tumor necrosis factor, alpha-induced protein 8-like 2 [Source:MGI Symbol;Acc:MGI:1917019]	Tnfaip8l2	41.8717	36.0171	37.7774	63.352	44.5965	47.8879		0.336582	0.0141546	0.000854879
	ENSMUSG00000020205	pleckstrin homology like domain, family A, member 1 [Source:MGI Symbol;Acc:MGI:1096880]	Phlda1	25.7035	32.4607	29.2038	13.3175	22.9654	20.2047		-0.479616	0.0141546	0.000856501
	ENSMUSG00000029364	WD repeat and SOCS box-containing 2 [Source:MGI Symbol;Acc:MGI:2144041]	Wsb2	33.5628	36.2719	34.4029	20.5495	27.0054	29.6424		-0.320998	0.0141924	0.000860599
	ENSMUSG00000026021	small ubiquitin-like modifier 1 [Source:MGI Symbol;Acc:MGI:1197010]	Sumo1	89.5195	93.9203	90.582	110.124	104.117	101.693		0.20335	0.0142175	0.000863935
	ENSMUSG00000096544	predicted pseudogene 4617 [Source:MGI Symbol;Acc:MGI:3704225]	Gm4617	41.1503	50.3528	45.8043	59.0171	69.7708	58.5053		0.49255	0.0142459	0.000869295
	ENSMUSG00000043102	pyroglutamylated RFamide peptide [Source:MGI Symbol;Acc:MGI:3630329]	Qrfp	6.6253	4.83613	6.5165	3.3585	4.19158	3.93905		-0.600251	0.0142459	0.000867516
	ENSMUSG00000026991	plakophilin 4 [Source:MGI Symbol;Acc:MGI:109281]	Pkp4	28.1142	28.1039	28.737	49.3343	32.0991	34.0502		0.287786	0.0142466	0.00087144
	ENSMUSG00000028042	zinc finger and BTB domain containing 7B [Source:MGI Symbol;Acc:MGI:102755]	Zbtb7b	15.8765	14.8438	15.7601	9.30968	12.3057	12.353		-0.358132	0.0142466	0.000874796
	ENSMUSG00000071392	epithelial cell transforming sequence 2 oncogene-like [Source:MGI Symbol;Acc:MGI:3641723]	Ect2l	2.95558	1.74304	2.01051	0.562502	1.04544	1.10439		-1.0291	0.0142466	0.000873525
	ENSMUSG00000106734	predicted gene, 20559 [Source:MGI Symbol;Acc:MGI:5295666]	Gm20559	36.1796	29.4031	31.4751	29.9624	26.0825	24.5357		-0.292001	0.0142594	0.000881042
	ENSMUSG00000068114	coiled-coil domain containing 134 [Source:MGI Symbol;Acc:MGI:1923707]	Ccdc134	26.1978	22.1739	24.001	20.9461	19.0913	18.5622		-0.317563	0.0142594	0.00087836
	ENSMUSG00000047909	ankyrin repeat domain 16 [Source:MGI Symbol;Acc:MGI:2444796]	Ankrd16	22.0887	19.2829	18.6655	18.2686	15.6695	12.7881		-0.400508	0.0142594	0.000880554
	ENSMUSG00000000340	dihydrolipoamide branched chain transacylase E2 [Source:MGI Symbol;Acc:MGI:105386]	Dbt	46.7513	48.0083	48.4251	33.7285	42.034	39.9874		-0.23479	0.0142872	0.000886409
	ENSMUSG00000028649	microtubule-actin crosslinking factor 1 [Source:MGI Symbol;Acc:MGI:108559]	Macf1	33.7041	31.4991	34.1955	26.1244	27.2988	26.6529		-0.295663	0.0142872	0.000885208
	ENSMUSG00000064326	SIVA1, apoptosis-inducing factor [Source:MGI Symbol;Acc:MGI:1353606]	Siva1	36.1077	39.7187	37.1856	48.5893	45.3294	42.2311		0.256939	0.0143272	0.000890719
	ENSMUSG00000037259	double zinc ribbon and ankyrin repeat domains 1 [Source:MGI Symbol;Acc:MGI:2139080]	Dzank1	0.656647	0.607948	0.670881	0.503388	0.363961	0.298068		-0.892369	0.0143473	0.000893804
	ENSMUSG00000032249	acidic (leucine-rich) nuclear phosphoprotein 32 family, member A [Source:MGI Symbol;Acc:MGI:108447]	Anp32a	248.178	237.903	265.674	331.515	281.101	282.921		0.185864	0.0143553	0.000896134
	ENSMUSG00000027074	solute carrier family 43, member 3 [Source:MGI Symbol;Acc:MGI:1931054]	Slc43a3	67.0757	65.4658	67.1963	53.6418	59.3865	54.1134		-0.223705	0.0143568	0.000900297
	ENSMUSG00000029120	protein phosphatase 2, regulatory subunit B, gamma [Source:MGI Symbol;Acc:MGI:2442660]	Ppp2r2c	63.733	59.8229	67.6824	11.2436	29.2461	45.228		-0.992103	0.0143568	0.000901726
	ENSMUSG00000035770	dynein, cytoplasmic 1 light intermediate chain 2 [Source:MGI Symbol;Acc:MGI:107738]	Dync1li2	41.9816	39.5104	42.3587	35.2976	35.9828	36.7183		-0.181877	0.0143568	0.000899849
	ENSMUSG00000038708	golgi autoantigen, golgin subfamily a, 4 [Source:MGI Symbol;Acc:MGI:1859646]	Golga4	23.9567	22.5929	23.7968	22.1539	20.2769	20.4421		-0.180702	0.014378	0.000904894
	ENSMUSG00000027433	5'-3' exoribonuclease 2 [Source:MGI Symbol;Acc:MGI:894687]	Xrn2	188.585	183.837	189.56	228.791	206.543	200.594		0.149204	0.0144081	0.000908623
	ENSMUSG00000006307	lysine (K)-specific methyltransferase 2B [Source:MGI Symbol;Acc:MGI:109565]	Kmt2b	80.2093	71.2226	75.1837	71.9853	64.6409	65.266		-0.181906	0.014451	0.000913174
	ENSMUSG00000031785	adhesion G protein-coupled receptor G1 [Source:MGI Symbol;Acc:MGI:1340051]	Adgrg1	5.04648	4.6749	4.1801	1.25542	2.68477	3.11799		-0.714061	0.0144737	0.000916458
	ENSMUSG00000020732	RAB37, member RAS oncogene family [Source:MGI Symbol;Acc:MGI:1929945]	Rab37	24.0173	23.795	26.3499	37.478	29.6079	27.89		0.241503	0.0145326	0.000922039
	ENSMUSG00000061981	flotillin 2 [Source:MGI Symbol;Acc:MGI:103309]	Flot2	47.6887	49.8287	47.4198	76.4919	55.4877	53.6403		0.250415	0.0145859	0.000929146
	ENSMUSG00000049744	Rho GTPase activating protein 15 [Source:MGI Symbol;Acc:MGI:1923367]	Arhgap15	24.6359	23.3672	25.3558	33.2297	30.241	26.6199		0.240956	0.0145859	0.000927969
	ENSMUSG00000002885	adhesion G protein-coupled receptor E5 [Source:MGI Symbol;Acc:MGI:1347095]	Adgre5	39.6033	27.9237	32.8912	85.4736	42.4204	43.1126		0.489429	0.014612	0.000932676
	ENSMUSG00000056724	neurobeachin-like 2 [Source:MGI Symbol;Acc:MGI:2448554]	Nbeal2	94.1057	85.4557	98.0123	96.0329	81.0399	77.6794		-0.198931	0.0146176	0.000936764
	ENSMUSG00000021431	small nuclear ribonucleoprotein 48 (U11/U12) [Source:MGI Symbol;Acc:MGI:1915047]	Snrnp48	20.0798	15.8347	16.8432	16.7476	14.0956	12.6205		-0.317317	0.0146176	0.000935594
	ENSMUSG00000004709	CD244 molecule A [Source:MGI Symbol;Acc:MGI:109294]	Cd244a	54.6849	54.4325	51.9229	23.4949	40.2831	41.5061		-0.43667	0.0146451	35.7253
	ENSMUSG00000022218	transglutaminase 1, K polypeptide [Source:MGI Symbol;Acc:MGI:98730]	Tgm1	1.3142	1.80512	1.59827	3.3879	2.43455	2.33647		0.660794	0.0146986	0.000945711
	ENSMUSG00000061111	MAPK regulated corepressor interacting protein 1 [Source:MGI Symbol;Acc:MGI:2384752]	Mcrip1	62.4871	66.5168	71.0846	87.1003	78.6242	80.2426		0.248654	0.0147056	0.000949748
	ENSMUSG00000020027	suppressor of cytokine signaling 2 [Source:MGI Symbol;Acc:MGI:1201787]	Socs2	27.492	23.8349	26.7088	53.4084	31.9036	31.7574		0.371756	0.0147056	0.000949916
	ENSMUSG00000052353	cell migration inducing protein, hyaluronan binding [Source:MGI Symbol;Acc:MGI:2443629]	Cemip	0.632261	0.606617	0.493124	0.0927297	0.285168	0.320293		-0.967691	0.0147922	0.000957397
	ENSMUSG00000046876	ataxin 1 [Source:MGI Symbol;Acc:MGI:104783]	Atxn1	12.4191	12.8317	11.9626	9.62842	10.6502	10.193		-0.225338	0.0149847	0.000971771
	ENSMUSG00000029119	mannosidase 2, alpha B2 [Source:MGI Symbol;Acc:MGI:1195262]	Man2b2	121.516	116.227	122.869	96.773	107.804	100.103		-0.210162	0.0150138	0.000978771
	ENSMUSG00000030096	solute carrier family 6 (neurotransmitter transporter, taurine), member 6 [Source:MGI Symbol;Acc:MGI:98488]	Slc6a6	107.95	105.908	107.16	89.7425	93.3582	95.2207		-0.173543	0.0150138	0.00097664
	ENSMUSG00000020610	archaelysin family metallopeptidase 2 [Source:MGI Symbol;Acc:MGI:104837]	Amz2	11.0474	10.415	12.1612	18.8707	14.266	13.3765		0.321815	0.0150138	0.000979407
	ENSMUSG00000036057	protein tyrosine phosphatase, non-receptor type 23 [Source:MGI Symbol;Acc:MGI:2144837]	Ptpn23	45.9132	47.9256	42.6346	39.1391	38.3601	35.0018		-0.251232	0.0150493	0.000983643
	ENSMUSG00000038615	nuclear factor, erythroid derived 2,-like 1 [Source:MGI Symbol;Acc:MGI:99421]	Nfe2l1	97.6097	101.966	100.883	77.5498	89.1117	86.3657		-0.193998	0.0151558	0.00100499
	ENSMUSG00000022305	low density lipoprotein-related protein 12 [Source:MGI Symbol;Acc:MGI:2443132]	Lrp12	56.3313	62.9998	58.2381	36.8091	52.6954	44.4531		-0.299045	0.0151558	0.000998665
	ENSMUSG00000021288	kinesin light chain 1 [Source:MGI Symbol;Acc:MGI:107978]	Klc1	45.3002	43.7763	43.7125	40.4962	39.5766	38.4341		-0.152644	0.0151558	0.00100535
	ENSMUSG00000023791	phosphatidylinositol glycan anchor biosynthesis, class X [Source:MGI Symbol;Acc:MGI:1919334]	Pigx	35.2356	38.3218	37.4588	45.4086	44.1903	41.2182		0.227247	0.0151558	0.00100699
	ENSMUSG00000041629	family with sequence similarity 104, member A [Source:MGI Symbol;Acc:MGI:106351]	Fam104a	16.7482	17.4351	19.1408	22.9539	22.6418	21.1139		0.284484	0.0151558	0.00100077
	ENSMUSG00000013089	ets variant 5 [Source:MGI Symbol;Acc:MGI:1096867]	Etv5	16.0077	16.3597	16.5487	13.0545	13.2507	13.2045		-0.293103	0.0151558	0.00100802
	ENSMUSG00000000562	adenosine A3 receptor [Source:MGI Symbol;Acc:MGI:104847]	Adora3	12.7224	16.5617	14.6236	4.19086	10.7412	9.54579		-0.628416	0.0151558	0.000998168
	ENSMUSG00000063564	collagen, type XXIII, alpha 1 [Source:MGI Symbol;Acc:MGI:2653243]	Col23a1	7.12383	7.52283	6.25266	4.28449	5.13757	4.93729		-0.406189	0.0151558	0.00100559
	ENSMUSG00000047293	G protein-coupled receptor 15 [Source:MGI Symbol;Acc:MGI:1918473]	Gpr15	0.422821	0.209077	0.398105	1.23106	0.954619	0.956735		1.42995	0.0151558	0.00100795
	ENSMUSG00000034156	TSPO associated protein 1 [Source:MGI Symbol;Acc:MGI:2450877]	Tspoap1	6.03946	6.69385	6.44442	3.87417	5.55888	4.03019		-0.439937	0.0153411	0.0010223
	ENSMUSG00000076749	T cell receptor gamma, constant 1 [Source:MGI Symbol;Acc:MGI:98625]	Trgc1	49.8448	51.7656	65.192	103.661	73.4188	77.1693		0.415002	0.0153654	0.00102588
	ENSMUSG00000054509	poly (ADP-ribose) polymerase family, member 4 [Source:MGI Symbol;Acc:MGI:2685589]	Parp4	56.6198	52.8325	55.6013	43.8424	48.3595	46.6322		-0.208702	0.0153962	0.00103004
	ENSMUSG00000086862	predicted gene 13546 [Source:MGI Symbol;Acc:MGI:3649666]	Gm13546	2.05361	1.94632	2.05442	6.25946	5.26066	2.65531		0.976018	0.0153962	0.00103187
	ENSMUSG00000029247	phosphoribosylaminoimidazole carboxylase, phosphoribosylaminoribosylaminoimidazole, succinocarboxamide synthetase [Source:MGI Symbol;Acc:MGI:1914304]	Paics	269.913	280.099	284.136	335.411	307.008	308.962		0.166391	0.0155255	0.00104251
	ENSMUSG00000029910	MAD2 mitotic arrest deficient-like 1 [Source:MGI Symbol;Acc:MGI:1860374]	Mad2l1	55.6376	56.8331	59.3998	78.9978	64.9293	64.0675		0.200581	0.015848	0.00106619
	ENSMUSG00000029068	cyclin L2 [Source:MGI Symbol;Acc:MGI:1927119]	Ccnl2	107.579	82.881	87.7976	84.2906	72.47	65.3007		-0.348144	0.0158985	0.00107522
	ENSMUSG00000021188	thyroid hormone receptor interactor 11 [Source:MGI Symbol;Acc:MGI:1924393]	Trip11	35.9482	33.5495	34.7008	27.7639	31.4274	29.9089		-0.173449	0.0158985	0.00107771
	ENSMUSG00000089682	BCL2-like 2 [Source:MGI Symbol;Acc:MGI:108052]	Bcl2l2	9.26132	8.80091	8.95134	5.90324	7.19751	6.82365		-0.360735	0.0158985	0.00107648
	ENSMUSG00000019796	low density lipoprotein receptor-related protein 11 [Source:MGI Symbol;Acc:MGI:2442989]	Lrp11	8.03756	7.51466	7.60747	5.05152	5.80647	5.92767		-0.387663	0.0158985	0.00107167
	ENSMUSG00000041722	KH domain containing 1C [Source:MGI Symbol;Acc:MGI:3583007]	Khdc1c	5.16055	6.68745	5.02643	0.841927	3.02868	3.16371		-0.943576	0.0159546	0.00108355
	ENSMUSG00000064363	mitochondrially encoded NADH dehydrogenase 4 [Source:MGI Symbol;Acc:MGI:102498]	mt-Nd4	1971.19	1565.63	1677.15	1683.75	1467.04	1325.47		-0.24799	0.0159648	0.00108753
	ENSMUSG00000026827	glycerol phosphate dehydrogenase 2, mitochondrial [Source:MGI Symbol;Acc:MGI:99778]	Gpd2	92.041	91.5479	93.137	62.9284	83.7143	74.7449		-0.237414	0.0159648	0.00109487
	ENSMUSG00000037058	polyadenylate-binding protein-interacting protein 2 [Source:MGI Symbol;Acc:MGI:1915119]	Paip2	39.7046	46.3265	43.6219	70.1155	53.5341	50.105		0.318003	0.0159648	0.00109851
	ENSMUSG00000110679	ribosomal protein L10, pseudogene 5 [Source:MGI Symbol;Acc:MGI:3781583]	Rpl10-ps5	23.1939	20.9819	19.6797	30.4278	36.9089	24.4101		0.572445	0.0159648	0.00109517
	ENSMUSG00000036281	small nuclear RNA activating complex, polypeptide 4 [Source:MGI Symbol;Acc:MGI:2443935]	Snapc4	22.5387	20.7212	20.815	21.4491	18.4364	16.2785		-0.236421	0.0159648	0.00108879
	ENSMUSG00000052151	phospholipid phosphatase 2 [Source:MGI Symbol;Acc:MGI:1354945]	Plpp2	21.9136	22.845	19.762	12.2677	12.799	17.5284		-0.486743	0.0159648	0.00109706
	ENSMUSG00000074412	predicted gene 10689 [Source:MGI Symbol;Acc:MGI:3642613]	Gm10689	2.1376	1.5855	0.754741	3.50083	3.89803	4.14585		1.78071	0.0159648	0.00109318
	ENSMUSG00000001054	required for meiotic nuclear division 5 homolog B [Source:MGI Symbol;Acc:MGI:1913339]	Rmnd5b	101.061	96.9349	99.0893	87.1887	81.0971	85.106		-0.229919	0.0159958	0.00110322
	ENSMUSG00000040455	ubiquitin specific petidase 45 [Source:MGI Symbol;Acc:MGI:101850]	Usp45	14.0904	11.808	13.6813	12.3277	10.8188	10.8594		-0.262521	0.0159958	0.00110677
	ENSMUSG00000002732	FK506 binding protein 7 [Source:MGI Symbol;Acc:MGI:1336879]	Fkbp7	1.94327	2.07556	1.7016	2.63093	3.40191	2.86441		0.769657	0.0159958	0.00110633
	ENSMUSG00000032252	glucuronyl C5-epimerase [Source:MGI Symbol;Acc:MGI:2136405]	Glce	9.56846	7.908	8.27297	10.7425	10.3582	9.86916		0.289448	0.0161386	0.00111871
	ENSMUSG00000019838	solute carrier family 16 (monocarboxylic acid transporters), member 10 [Source:MGI Symbol;Acc:MGI:1919722]	Slc16a10	30.3169	30.184	31.2152	17.4413	24.3801	26.2649		-0.318799	0.0161732	0.00112317
	ENSMUSG00000027863	CD2 antigen [Source:MGI Symbol;Acc:MGI:88320]	Cd2	394.292	410.267	418.328	574.483	467.034	454.696		0.213907	0.0161798	0.00112776
	ENSMUSG00000020409	SLU7 splicing factor homolog (S. cerevisiae) [Source:MGI Symbol;Acc:MGI:2385598]	Slu7	65.6954	67.7889	68.4298	78.0764	77.9605	72.0825		0.172604	0.0161798	0.00112572
	ENSMUSG00000021196	phosphofructokinase, platelet [Source:MGI Symbol;Acc:MGI:1891833]	Pfkp	171.875	166.775	166.43	145.911	156.804	141.75		-0.152948	0.016302	0.00113863
	ENSMUSG00000024594	proline-rich coiled-coil 1 [Source:MGI Symbol;Acc:MGI:1916106]	Prrc1	20.3468	20.1413	21.3074	17.5914	18.6746	17.5285		-0.187654	0.016302	0.00114044
	ENSMUSG00000004880	lamin B receptor [Source:MGI Symbol;Acc:MGI:2138281]	Lbr	245.965	257.253	257.77	306.353	282.022	274.684		0.157595	0.0163389	0.00114511
	ENSMUSG00000040856	delta like non-canonical Notch ligand 1 [Source:MGI Symbol;Acc:MGI:94900]	Dlk1	0.0204048	0	0	0.0891144	0.0212625	0.07915		2.37355	0.0164108	0.00115224
	ENSMUSG00000036529	SET binding factor 1 [Source:MGI Symbol;Acc:MGI:1925230]	Sbf1	94.901	89.2377	96.1044	95.4734	83.1189	77.8777		-0.183716	0.0164721	0.00116054
	ENSMUSG00000018983	E2F transcription factor 2 [Source:MGI Symbol;Acc:MGI:1096341]	E2f2	39.3437	35.2616	41.3905	77.7039	48.2163	45.995		0.342547	0.0164721	0.00116075
	ENSMUSG00000025958	cAMP responsive element binding protein 1 [Source:MGI Symbol;Acc:MGI:88494]	Creb1	13.7673	11.1066	12.5631	18.113	14.451	14.1898		0.252036	0.016533	0.00116844
	ENSMUSG00000081357	X-linked lymphocyte-regulated 4E, pseudogene [Source:MGI Symbol;Acc:MGI:3574182]	Xlr4e-ps	6.94719	5.98967	7.29583	2.72287	3.52679	4.31859		-0.846586	0.016533	0.00116927
	ENSMUSG00000025431	cysteine-rich secretory protein 1 [Source:MGI Symbol;Acc:MGI:102553]	Crisp1	6.84755	7.49754	6.50484	1.69108	3.99241	4.18977		-0.821587	0.0167546	0.00118707
	ENSMUSG00000025041	5'-nucleotidase, cytosolic II [Source:MGI Symbol;Acc:MGI:2178563]	Nt5c2	23.8035	23.1684	23.478	18.4986	20.63	20.5073		-0.187808	0.0167988	0.00119401
	ENSMUSG00000035735	diacylglycerol lipase, alpha [Source:MGI Symbol;Acc:MGI:2677061]	Dagla	0.461962	0.55618	0.425502	0.131578	0.209295	0.194776		-1.17026	0.0167988	0.00119449
	ENSMUSG00000066551	high mobility group box 1 [Source:MGI Symbol;Acc:MGI:96113]	Hmgb1	208.73	200.063	202.441	250.078	224.999	224.99		0.178307	0.016802	0.00120079
	ENSMUSG00000038181	chondroitin polymerizing factor 2 [Source:MGI Symbol;Acc:MGI:1917522]	Chpf2	36.3766	32.2366	32.5144	26.9066	26.7772	29.2265		-0.238015	0.016802	0.00120759
	ENSMUSG00000047388	ATM interactor [Source:MGI Symbol;Acc:MGI:2682328]	Atmin	29.893	28.3225	30.3518	26.7462	25.2304	25.959		-0.195913	0.016802	0.00120257
	ENSMUSG00000037979	coiled-coil domain containing 92 [Source:MGI Symbol;Acc:MGI:106485]	Ccdc92	11.3781	11.4198	13.7695	22.6752	15.9553	15.6278		0.376048	0.016802	0.00120602
	ENSMUSG00000019699	thymoma viral proto-oncogene 3 [Source:MGI Symbol;Acc:MGI:1345147]	Akt3	9.61918	9.37933	9.70381	18.324	11.9719	11.6438		0.375512	0.016802	0.00120569
	ENSMUSG00000105504	guanylate binding protein 5 [Source:MGI Symbol;Acc:MGI:2429943]	Gbp5	9.39164	8.29037	9.11284	17.3559	11.9611	10.9121		0.424685	0.016802	0.00120759
	ENSMUSG00000026950	nebulin [Source:MGI Symbol;Acc:MGI:97292]	Neb	22.6057	21.7528	22.1511	11.3722	17.6804	16.605		-0.409007	0.0168216	0.00121115
	ENSMUSG00000094410	predicted gene, 38394 [Source:MGI Symbol;Acc:MGI:5614057]	Gm38394	24.6977	21.1092	21.9912	21.096	19.8733	17.6239		-0.217371	0.016854	0.00121563
	ENSMUSG00000021115	vaccinia related kinase 1 [Source:MGI Symbol;Acc:MGI:1261847]	Vrk1	52.6895	52.6428	53.4873	71.7254	60.5167	56.1657		0.18264	0.0169367	0.00122376
	ENSMUSG00000022157	mast cell protease 8 [Source:MGI Symbol;Acc:MGI:1261780]	Mcpt8	9.25292	11.896	10.6178	0.631413	5.18249	5.15946		-1.28483	0.0170447	0.00123592
	ENSMUSG00000102324	predicted gene, 19721 [Source:MGI Symbol;Acc:MGI:5011906]	Gm19721	0.588929	0.711857	0.831755	0.500119	0.068187	0.317284		-1.91127	0.0170447	0.0012349
	ENSMUSG00000057948	unc-13 homolog D [Source:MGI Symbol;Acc:MGI:1917700]	Unc13d	120.29	118.596	118.601	108.791	108.791	101.77		-0.153502	0.0170991	0.00124422
	ENSMUSG00000017466	tissue inhibitor of metalloproteinase 2 [Source:MGI Symbol;Acc:MGI:98753]	Timp2	0.533302	0.468813	0.585815	2.16735	1.17318	1.12053		1.15647	0.0170991	0.0012436
	ENSMUSG00000026436	ELK4, member of ETS oncogene family [Source:MGI Symbol;Acc:MGI:102853]	Elk4	32.3031	31.3942	32.2384	49.6685	37.2279	35.4141		0.242181	0.0171164	0.00124816
	ENSMUSG00000104074	predicted gene, 37025 [Source:MGI Symbol;Acc:MGI:5610253]	Gm37025	1.94936	1.65244	1.57321	2.2804	3.91751	3.51072		1.09383	0.0171164	0.00124985
	ENSMUSG00000039834	zinc finger protein 335 [Source:MGI Symbol;Acc:MGI:2682313]	Zfp335	43.1981	39.7368	42.3113	39.2465	36.9494	33.6545		-0.213584	0.0171176	0.00125318
	ENSMUSG00000022946	DOP1 leucine zipper like protein B [Source:MGI Symbol;Acc:MGI:1917278]	Dop1b	9.60556	8.65693	8.91769	7.77334	7.6134	7.20975		-0.253443	0.0171176	0.00125431
	ENSMUSG00000031681	SMAD family member 1 [Source:MGI Symbol;Acc:MGI:109452]	Smad1	4.07379	3.02617	3.69681	7.54731	4.78285	4.7907		0.486454	0.0171944	0.00126214
	ENSMUSG00000031901	dihydrouridine synthase 2 [Source:MGI Symbol;Acc:MGI:1913619]	Dus2	24.9236	26.0047	24.4028	17.1059	20.5412	20.446		-0.284173	0.0173201	0.00127357
	ENSMUSG00000003271	sulfotransferase family, cytosolic, 2B, member 1 [Source:MGI Symbol;Acc:MGI:1926342]	Sult2b1	7.21804	9.24808	8.93537	3.25445	5.66391	6.54624		-0.573346	0.0173693	0.00127941
	ENSMUSG00000023367	transmembrane protein 176A [Source:MGI Symbol;Acc:MGI:1913308]	Tmem176a	5.84725	6.80142	7.61635	13.0661	10.576	8.43207		0.486061	0.0174348	0.00128645
	ENSMUSG00000087113	predicted gene 11714 [Source:MGI Symbol;Acc:MGI:3649214]	Gm11714	55.0797	50.5623	53.5039	17.1205	36.7986	35.3959		-0.641699	0.0174785	0.00129415
	ENSMUSG00000057706	mex3 RNA binding family member B [Source:MGI Symbol;Acc:MGI:1918252]	Mex3b	3.54376	4.15113	4.20315	8.41452	5.98721	5.00468		0.513747	0.0174785	0.00129371
	ENSMUSG00000013663	phosphatase and tensin homolog [Source:MGI Symbol;Acc:MGI:109583]	Pten	28.5792	25.8232	27.8247	35.9788	30.2717	29.4266		0.162197	0.0174823	0.00129889
	ENSMUSG00000057530	endothelin converting enzyme 1 [Source:MGI Symbol;Acc:MGI:1101357]	Ece1	29.2713	26.7297	28.3293	24.2311	24.0337	23.866		-0.213615	0.0174823	0.00129709
	ENSMUSG00000002319	importin 4 [Source:MGI Symbol;Acc:MGI:1923001]	Ipo4	23.0663	22.396	23.5685	17.3834	19.8108	19.0359		-0.253085	0.0177772	0.00132307
	ENSMUSG00000036499	early endosome antigen 1 [Source:MGI Symbol;Acc:MGI:2442192]	Eea1	39.2669	36.6556	37.8922	29.5629	33.08	33.8078		-0.180706	0.0177858	0.00132598
	ENSMUSG00000031822	genetic suppressor element 1, coiled-coil protein [Source:MGI Symbol;Acc:MGI:1098275]	Gse1	35.4955	33.9788	34.7751	32.2411	31.9559	29.1335		-0.159669	0.0178124	0.0013327
	ENSMUSG00000076757	T cell receptor gamma, constant 4 [Source:MGI Symbol;Acc:MGI:98628]	Trgc4	10.6641	11.8212	12.2475	20.3439	22.7131	14.6599		0.666287	0.0178124	0.00133426
	ENSMUSG00000021340	glycosylphosphatidylinositol specific phospholipase D1 [Source:MGI Symbol;Acc:MGI:106604]	Gpld1	6.71477	5.18604	5.5395	20.365	8.15207	8.18604		0.670527	0.0178124	0.00133478
	ENSMUSG00000003352	calcium channel, voltage-dependent, beta 3 subunit [Source:MGI Symbol;Acc:MGI:103307]	Cacnb3	1.41049	1.39492	1.15865	2.20003	1.76973	1.95403		0.609531	0.0178905	0.00134292
	ENSMUSG00000056476	mediator complex subunit 12-like [Source:MGI Symbol;Acc:MGI:2139916]	Med12l	6.58412	5.51863	6.27801	4.7892	5.06083	4.96411		-0.285975	0.0179307	0.00134823
	ENSMUSG00000050947	adhesion molecule with Ig like domain 1 [Source:MGI Symbol;Acc:MGI:2653612]	Amigo1	4.77139	3.42056	4.28159	2.04742	2.43169	3.3743		-0.575642	0.0179429	0.00135144
	ENSMUSG00000028341	nuclear receptor subfamily 4, group A, member 3 [Source:MGI Symbol;Acc:MGI:1352457]	Nr4a3	20.9382	17.9614	17.1411	11.7883	13.4004	13.7048		-0.414017	0.0181123	0.00136651
	ENSMUSG00000062115	retinoic acid induced 1 [Source:MGI Symbol;Acc:MGI:103291]	Rai1	38.7656	33.8743	37.3522	37.8051	31.0895	31.2553		-0.195317	0.0181897	0.00137467
	ENSMUSG00000030124	lymphocyte-activation gene 3 [Source:MGI Symbol;Acc:MGI:106588]	Lag3	83.8497	87.5792	85.8794	114.198	110.016	94.3697		0.285076	0.0182711	0.00138939
	ENSMUSG00000033596	ring finger and WD repeat domain 3 [Source:MGI Symbol;Acc:MGI:2384584]	Rfwd3	60.9349	59.6534	61.4307	79.1934	64.9873	67.45		0.16165	0.0182711	0.00138411
	ENSMUSG00000015112	solute carrier family 25 (mitochondrial carrier, adenine nucleotide translocator), member 13 [Source:MGI Symbol;Acc:MGI:1354721]	Slc25a13	29.511	30.5077	31.1626	19.0804	23.7207	26.9087		-0.303575	0.0182711	0.0013859
	ENSMUSG00000096656	T cell receptor alpha variable 12-2 [Source:MGI Symbol;Acc:MGI:5293447]	Trav12-2	10.8385	12.8627	13.0113	20.7092	18.0705	18.3936		0.574619	0.0182711	0.00139249
	ENSMUSG00000044117	bMERB domain containing 1 [Source:MGI Symbol;Acc:MGI:1914504]	Bmerb1	2.5544	2.04957	2.55257	0.684088	1.20533	1.49562		-0.924492	0.0182711	0.00139193
	ENSMUSG00000056917	signal-induced proliferation associated gene 1 [Source:MGI Symbol;Acc:MGI:107576]	Sipa1	132.958	127.073	136.278	119.328	115.437	112.419		-0.202094	0.0182737	0.00139529
	ENSMUSG00000023051	TARBP2, RISC loading complex RNA binding subunit [Source:MGI Symbol;Acc:MGI:103027]	Tarbp2	21.4417	23.9404	22.9001	20.2246	19.5931	18.5538		-0.231241	0.0182737	0.00139968
	ENSMUSG00000027165	intraflagellar transport associated protein [Source:MGI Symbol;Acc:MGI:1915420]	Iftap	0.511348	0.505704	0.589152	0.646458	0.953506	1.01785		0.778882	0.0182737	0.00139945
	ENSMUSG00000036721	zinc finger and SCAN domain containing 12 [Source:MGI Symbol;Acc:MGI:1099444]	Zscan12	1.03825	1.07242	1.336	2.56947	1.73102	2.01367		0.675388	0.0182901	0.00140327
	ENSMUSG00000005470	anti-silencing function 1B histone chaperone [Source:MGI Symbol;Acc:MGI:1914179]	Asf1b	120.367	114.254	126.87	165.758	138.443	134.249		0.200784	0.0183738	0.00141204
	ENSMUSG00000017715	phosphatidylglycerophosphate synthase 1 [Source:MGI Symbol;Acc:MGI:1921701]	Pgs1	49.4793	46.4073	46.1285	40.3164	41.5901	40.9299		-0.169884	0.018467	0.00142156
	ENSMUSG00000038241	centrosomal protein 250 [Source:MGI Symbol;Acc:MGI:108084]	Cep250	71.2077	68.5839	72.876	65.451	64.1589	61.7693		-0.159018	0.0185713	0.00143641
	ENSMUSG00000028980	hexose-6-phosphate dehydrogenase (glucose 1-dehydrogenase) [Source:MGI Symbol;Acc:MGI:2140356]	H6pd	42.4816	39.9851	40.6159	34.9014	34.9635	35.9373		-0.19016	0.0185713	0.00143518
	ENSMUSG00000039623	adaptor-related protein complex 5, zeta 1 subunit [Source:MGI Symbol;Acc:MGI:1924908]	Ap5z1	11.0964	8.60172	9.92907	8.60215	8.16917	7.37554		-0.307755	0.0185713	0.0014367
	ENSMUSG00000004207	prosaposin [Source:MGI Symbol;Acc:MGI:97783]	Psap	235.782	241.25	249.734	328.027	266.645	277.764		0.196227	0.0186032	0.0014501
	ENSMUSG00000097195	small nucleolar RNA host gene 5 [Source:MGI Symbol;Acc:MGI:1919905]	Snhg5	63.8455	52.366	58.947	51.2582	50.0789	49.1615		-0.21128	0.0186032	0.00145342
	ENSMUSG00000044934	zinc finger protein 367 [Source:MGI Symbol;Acc:MGI:2442266]	Zfp367	26.5234	25.3611	25.6037	38.1244	29.7978	28.2585		0.230202	0.0186032	0.00144519
	ENSMUSG00000033396	SPG11, spatacsin vesicle trafficking associated [Source:MGI Symbol;Acc:MGI:2444989]	Spg11	18.8604	16.381	19.5722	18.414	15.54	15.0188		-0.244307	0.0186032	0.00145146
	ENSMUSG00000000627	sema domain, immunoglobulin domain (Ig), TM domain, and short cytoplasmic domain [Source:MGI Symbol;Acc:MGI:1340055]	Sema4f	3.46945	2.76219	3.29746	5.16985	4.07003	4.78223		0.495095	0.0186032	0.00144909
	ENSMUSG00000015316	signaling lymphocytic activation molecule family member 1 [Source:MGI Symbol;Acc:MGI:1351314]	Slamf1	1.89383	1.66895	2.03912	4.38116	3.22393	2.34568		0.600755	0.0186032	0.00144179
	ENSMUSG00000025140	pyrroline-5-carboxylate reductase 1 [Source:MGI Symbol;Acc:MGI:2384795]	Pycr1	11.9684	13.6639	11.7452	6.34154	10.1789	8.67626		-0.404391	0.0186354	0.00146069
	ENSMUSG00000034312	IQ motif and Sec7 domain 1 [Source:MGI Symbol;Acc:MGI:1196356]	Iqsec1	11.1658	11.3791	10.738	8.08787	10.0204	8.36322		-0.255623	0.0186354	0.00146035
	ENSMUSG00000025047	programmed cell death 11 [Source:MGI Symbol;Acc:MGI:1341788]	Pdcd11	58.8509	56.3174	61.134	54.1144	52.312	51.5975		-0.170986	0.0188423	0.00147932
	ENSMUSG00000059970	heat shock protein 2 [Source:MGI Symbol;Acc:MGI:96243]	Hspa2	4.97694	5.52646	5.54923	4.00398	4.13981	3.42926		-0.492347	0.018864	0.00148342
	ENSMUSG00000064918	predicted gene, 22571 [Source:MGI Symbol;Acc:MGI:5452348]	Gm22571	41.2251	39.1392	36.0982	12.603	13.7465	20.7885		-1.14033	0.0188858	0.00148755
	ENSMUSG00000041920	solute carrier family 16 (monocarboxylic acid transporters), member 6 [Source:MGI Symbol;Acc:MGI:2144585]	Slc16a6	139.258	147.073	144.595	102.466	128.534	122.345		-0.209097	0.0189974	0.00150847
	ENSMUSG00000038623	transmembrane 6 superfamily member 1 [Source:MGI Symbol;Acc:MGI:1933209]	Tm6sf1	58.3877	54.3306	55.2729	44.3585	49.9939	46.8283		-0.196323	0.0189974	0.00150267
	ENSMUSG00000013076	angiomotin-like 1 [Source:MGI Symbol;Acc:MGI:1922973]	Amotl1	6.82442	5.53539	6.00973	3.44379	3.84845	4.7716		-0.514972	0.0189974	0.00150796
	ENSMUSG00000091933	predicted gene 8857 [Source:MGI Symbol;Acc:MGI:3648006]	Gm8857	7.85595	6.42257	7.2488	0.914918	3.82021	3.85993		-1.06597	0.0189974	0.00150194
	ENSMUSG00000040591	RIKEN cDNA 1110051M20 gene [Source:MGI Symbol;Acc:MGI:1915079]	1110051M20Rik	1.57546	1.44835	1.28489	2.30159	2.31222	1.74298		0.593015	0.0189974	0.0015078
	ENSMUSG00000056665	thioesterase superfamily member 6 [Source:MGI Symbol;Acc:MGI:1925301]	Them6	36.4278	36.7936	43.0405	77.6384	48.2072	48.5023		0.347993	0.0191076	0.00152164
	ENSMUSG00000039254	protein-O-mannosyltransferase 1 [Source:MGI Symbol;Acc:MGI:2138994]	Pomt1	5.9489	5.45794	5.85844	5.98652	4.72389	4.08342		-0.333223	0.0191076	0.00152247
	ENSMUSG00000090115	ubiquitin specific peptidase 49 [Source:MGI Symbol;Acc:MGI:2685391]	Usp49	2.11194	1.88908	2.2038	2.65837	2.77541	2.56984		0.354451	0.0191076	0.00152454
	ENSMUSG00000026672	optineurin [Source:MGI Symbol;Acc:MGI:1918898]	Optn	10.3958	11.8932	10.0994	5.1715	7.98034	7.96361		-0.438721	0.0191925	0.00153621
	ENSMUSG00000055912	transmembrane protein 150A [Source:MGI Symbol;Acc:MGI:2385244]	Tmem150a	5.44341	4.42465	5.00235	1.70971	3.10806	2.96476		-0.75734	0.0191925	0.00153614
	ENSMUSG00000035314	glycerophosphodiester phosphodiesterase domain containing 5 [Source:MGI Symbol;Acc:MGI:2686926]	Gdpd5	19.7836	15.3642	18.1433	13.1472	12.1906	13.5874		-0.449529	0.0192192	0.0015408
	ENSMUSG00000112023	leukocyte immunoglobulin-like receptor, subfamily B, member 4B [Source:MGI Symbol;Acc:MGI:102702]	Lilr4b	34.9325	33.6654	30.168	21.1324	26.2281	22.2682		-0.396491	0.0192728	0.00154756
	ENSMUSG00000021892	SH3-domain binding protein 5 (BTK-associated) [Source:MGI Symbol;Acc:MGI:1344391]	Sh3bp5	18.7204	20.1221	22.509	42.181	26.3234	26.9506		0.411507	0.0194675	0.00156567
	ENSMUSG00000036466	multiple EGF-like-domains 11 [Source:MGI Symbol;Acc:MGI:1920951]	Megf11	3.72688	3.44071	3.64511	1.33007	2.62488	2.43278		-0.58468	0.0195573	0.0015754
	ENSMUSG00000030616	synaptotagmin-like 2 [Source:MGI Symbol;Acc:MGI:1933366]	Sytl2	49.3648	46.8311	49.5278	29.0498	39.6427	39.6052		-0.32766	0.0196252	0.00158337
	ENSMUSG00000026311	ankyrin repeat and SOCS box-containing 1 [Source:MGI Symbol;Acc:MGI:1929735]	Asb1	24.7479	28.2905	24.6234	18.0463	22.0854	20.2922		-0.266614	0.0196517	0.00158801
	ENSMUSG00000068917	CDC-like kinase 2 [Source:MGI Symbol;Acc:MGI:1098669]	Clk2	46.1154	34.3394	38.3794	37.0551	31.5062	31.264		-0.26868	0.019728	0.0015967
	ENSMUSG00000079435	ribosomal protein L36A [Source:MGI Symbol;Acc:MGI:1201789]	Rpl36a	412.968	411.927	395.099	481.96	450.894	445.249		0.180266	0.0200562	0.00162666
	ENSMUSG00000057236	retinoblastoma binding protein 4, chromatin remodeling factor [Source:MGI Symbol;Acc:MGI:1194912]	Rbbp4	110.678	116.297	116.106	147.391	128.838	126.25		0.188035	0.0200562	0.00162839
	ENSMUSG00000068227	interleukin 2 receptor, beta chain [Source:MGI Symbol;Acc:MGI:96550]	Il2rb	1793.11	1728.58	1727.63	1374.07	1510.1	1561.67		-0.182134	0.0200572	0.00164004
	ENSMUSG00000059810	regulator of G-protein signaling 3 [Source:MGI Symbol;Acc:MGI:1354734]	Rgs3	50.325	47.1801	45.7632	35.0518	39.8119	41.8485		-0.21147	0.0200572	0.00163737
	ENSMUSG00000073643	WD repeat and FYVE domain containing 1 [Source:MGI Symbol;Acc:MGI:1916618]	Wdfy1	8.98462	7.16114	8.06577	6.23546	6.15499	5.59		-0.424302	0.0200572	0.00163453
	ENSMUSG00000031162	GATA binding protein 1 [Source:MGI Symbol;Acc:MGI:95661]	Gata1	2.79343	2.29436	2.64128	7.49563	3.74956	3.76494		0.646585	0.0200572	0.00164109
	ENSMUSG00000037032	amyloid beta (A4) precursor protein-binding, family B, member 1 [Source:MGI Symbol;Acc:MGI:107765]	Apbb1	1.23077	0.984104	1.23895	2.17293	1.88282	1.59984		0.60734	0.0200572	0.00164127
	ENSMUSG00000034282	envoplakin [Source:MGI Symbol;Acc:MGI:107507]	Evpl	6.74427	5.54329	6.10319	2.05312	3.39141	4.47121		-0.721679	0.02017	0.00165488
	ENSMUSG00000003032	Kruppel-like factor 4 (gut) [Source:MGI Symbol;Acc:MGI:1342287]	Klf4	0.189292	0.411845	0.320808	1.07471	0.907342	0.587408		1.30386	0.02017	0.00165565
	ENSMUSG00000027254	microtubule-associated protein 1 A [Source:MGI Symbol;Acc:MGI:1306776]	Map1a	0.256174	0.253346	0.1742	0.621552	0.365809	0.368035		0.933856	0.020286	0.00166776
	ENSMUSG00000054892	TXK tyrosine kinase [Source:MGI Symbol;Acc:MGI:102960]	Txk	22.9701	23.5398	22.3963	14.553	19.1156	18.6376		-0.289139	0.0204088	0.00168046
	ENSMUSG00000024383	mitogen-activated protein kinase kinase kinase 2 [Source:MGI Symbol;Acc:MGI:1346873]	Map3k2	16.6401	15.7936	16.7699	11.8802	14.865	13.7856		-0.212422	0.0204542	0.00168681
	ENSMUSG00000036800	family with sequence similarity 135, member B [Source:MGI Symbol;Acc:MGI:1917613]	Fam135b	0.0118438	0.00585656	0.00836364	0.0452601	0.0246833	0.0516849		1.8808	0.0206256	0.00170357
	ENSMUSG00000096732	predicted gene 8897 [Source:MGI Symbol;Acc:MGI:3779819]	Gm8897	11.4485	8.62143	7.7136	1.4908	3.83064	5.90755		-0.979874	0.0207135	0.00171348
	ENSMUSG00000090582	predicted gene 17024 [Source:MGI Symbol;Acc:MGI:4937851]	Gm17024	5.09786	4.68148	5.01415	4.96964	2.84579	1.58902		-1.03453	0.0207475	0.00171894
	ENSMUSG00000041272	thymocyte selection-associated high mobility group box [Source:MGI Symbol;Acc:MGI:2181659]	Tox	1.09226	1.0652	1.21052	3.6108	1.92856	1.91246		0.836472	0.0207725	0.00172366
	ENSMUSG00000079037	prion protein [Source:MGI Symbol;Acc:MGI:97769]	Prnp	54.7838	56.7126	59.9773	96.1766	64.1196	72.4754		0.292056	0.0208209	0.00173565
	ENSMUSG00000024538	peptidylprolyl isomerase C [Source:MGI Symbol;Acc:MGI:97751]	Ppic	22.7076	22.1315	19.8115	38.4468	25.9768	26.5683		0.406267	0.0208209	0.00173469
	ENSMUSG00000023805	synaptojanin 2 [Source:MGI Symbol;Acc:MGI:1201671]	Synj2	5.99152	5.02221	6.17545	4.48704	4.78705	4.56232		-0.316577	0.0208209	0.00173532
	ENSMUSG00000050965	protein kinase C, alpha [Source:MGI Symbol;Acc:MGI:97595]	Prkca	19.2041	18.6367	19.6437	28.6483	22.9809	21.4739		0.256191	0.0209125	0.00174864
	ENSMUSG00000042156	DAZ interacting protein 1 [Source:MGI Symbol;Acc:MGI:1914311]	Dzip1	1.94828	1.84018	1.57675	2.66496	2.53201	2.00609		0.45641	0.0209125	0.00174772
	ENSMUSG00000021831	endoplasmic reticulum oxidoreductase 1 alpha [Source:MGI Symbol;Acc:MGI:1354385]	Ero1a	129.867	140.962	132.995	72.4941	118.575	103.889		-0.312147	0.02113	0.00177102
	ENSMUSG00000023951	vascular endothelial growth factor A [Source:MGI Symbol;Acc:MGI:103178]	Vegfa	9.18592	9.80383	8.54116	4.26473	7.38253	5.90385		-0.469284	0.02113	0.00177221
	ENSMUSG00000012443	kinesin family member 11 [Source:MGI Symbol;Acc:MGI:1098231]	Kif11	148.43	143.181	154.164	203.462	164.729	160.803		0.165152	0.0211391	0.00177567
	ENSMUSG00000015355	CD48 antigen [Source:MGI Symbol;Acc:MGI:88339]	Cd48	568.025	593.054	579.085	681.346	646.326	612.505		0.14729	0.0211485	3.6904
	ENSMUSG00000003363	phospholipase D family, member 3 [Source:MGI Symbol;Acc:MGI:1333782]	Pld3	158.894	156.281	151.901	113.66	129.414	137.702		-0.217549	0.0211485	0.00178826
	ENSMUSG00000028292	arginyl-tRNA synthetase 2, mitochondrial [Source:MGI Symbol;Acc:MGI:1923596]	Rars2	41.8231	39.7548	42.9475	35.021	35.8545	36.397		-0.203783	0.0211485	0.00178291
	ENSMUSG00000015335	zinc finger, DHHC domain containing 12 [Source:MGI Symbol;Acc:MGI:1913470]	Zdhhc12	33.95	28.2672	32.7875	26.9005	24.7976	27.0282		-0.283276	0.0211485	0.00178694
	ENSMUSG00000021458	aminopeptidase O [Source:MGI Symbol;Acc:MGI:1919311]	Aopep	25.0708	24.1169	24.2356	21.191	21.0339	21.7553		-0.173737	0.0211485	0.00178997
	ENSMUSG00000022965	interferon gamma receptor 2 [Source:MGI Symbol;Acc:MGI:107654]	Ifngr2	4.44316	3.6062	4.52243	8.46445	6.57767	6.38881		0.647101	0.0212808	0.00180388
	ENSMUSG00000106620	T cell receptor alpha variable 7-5 [Source:MGI Symbol;Acc:MGI:3648929]	Trav7-5	7.87802	4.40364	6.04688	10.8453	9.99375	13.2864		0.942768	0.0213913	0.00181597
	ENSMUSG00000019792	tRNA methyltransferase 11 [Source:MGI Symbol;Acc:MGI:1920931]	Trmt11	13.7438	14.2803	14.4504	17.7838	16.7914	15.732		0.219928	0.0213991	0.00181937
	ENSMUSG00000007827	ankyrin repeat domain 26 [Source:MGI Symbol;Acc:MGI:1917887]	Ankrd26	12.2067	10.4351	10.9349	9.5917	9.53566	9.09023		-0.225683	0.0214957	0.00183032
	ENSMUSG00000059495	Rho guanine nucleotide exchange factor (GEF) 12 [Source:MGI Symbol;Acc:MGI:1916882]	Arhgef12	6.44951	6.33641	5.71542	4.68217	4.61876	4.28191		-0.401521	0.0215079	0.00183411
	ENSMUSG00000029102	hepatocyte growth factor activator [Source:MGI Symbol;Acc:MGI:1859281]	Hgfac	2.97884	2.94596	2.27086	1.40444	1.72839	1.47719		-0.649052	0.02153	0.00183874
	ENSMUSG00000045672	collagen, type XXVII, alpha 1 [Source:MGI Symbol;Acc:MGI:2672118]	Col27a1	0.726868	0.75391	0.826262	0.251634	0.424894	0.550148		-0.779325	0.0217835	0.00186318
	ENSMUSG00000030102	inositol 1,4,5-trisphosphate receptor 1 [Source:MGI Symbol;Acc:MGI:96623]	Itpr1	11.4365	10.1388	11.0839	9.19134	9.92118	8.92131		-0.199584	0.0217951	0.00186695
	ENSMUSG00000028479	glucosamine (UDP-N-acetyl)-2-epimerase/N-acetylmannosamine kinase [Source:MGI Symbol;Acc:MGI:1354951]	Gne	52.7769	45.3356	49.2944	38.6336	39.3309	43.8562		-0.23595	0.021929	0.00188122
	ENSMUSG00000019852	ARFGEF family member 3 [Source:MGI Symbol;Acc:MGI:106387]	Arfgef3	12.106	10.328	12.3674	8.48038	10.1809	9.31345		-0.279061	0.0220778	0.0018968
	ENSMUSG00000043036	coiled-coil domain containing 63 [Source:MGI Symbol;Acc:MGI:3607777]	Ccdc63	0.408269	0.46588	0.410277	0.257169	0.163627	0.228414		-1.03632	0.0221596	0.00190666
	ENSMUSG00000057058	src family associated phosphoprotein 1 [Source:MGI Symbol;Acc:MGI:1925723]	Skap1	92.1183	100.403	98.9679	116.319	106.984	107.453		0.16167	0.0221789	0.00191115
	ENSMUSG00000007891	cathepsin D [Source:MGI Symbol;Acc:MGI:88562]	Ctsd	554.369	586.998	547.562	333.918	465.779	475.463		-0.278671	0.0223659	0.00193012
	ENSMUSG00000036155	mannoside acetylglucosaminyltransferase 5 [Source:MGI Symbol;Acc:MGI:894701]	Mgat5	42.8811	37.5048	41.9639	25.1178	34.7369	32.7188		-0.306279	0.0224274	0.00193843
	ENSMUSG00000030257	SLIT-ROBO Rho GTPase activating protein 3 [Source:MGI Symbol;Acc:MGI:2152938]	Srgap3	9.2794	8.89889	9.80428	5.85889	7.91136	7.18075		-0.347268	0.0224274	0.00194115
	ENSMUSG00000027883	G-protein signalling modulator 2 (AGS3-like, C. elegans) [Source:MGI Symbol;Acc:MGI:1923373]	Gpsm2	33.8111	34.3432	37.0964	54.9386	39.7863	41.8658		0.247884	0.0224742	0.00194858
	ENSMUSG00000087259	RIKEN cDNA 2610035D17 gene [Source:MGI Symbol;Acc:MGI:1919636]	2610035D17Rik	4.24496	3.65988	3.95839	5.05071	5.27403	6.01647		0.512342	0.0224742	0.00195094
	ENSMUSG00000043068	family with sequence similarity 89, member A [Source:MGI Symbol;Acc:MGI:1916877]	Fam89a	0.603895	0.426592	0.304604	1.3187	0.719175	1.17125		1.28046	0.0224839	0.00195465
	ENSMUSG00000053175	B cell leukemia/lymphoma 3 [Source:MGI Symbol;Acc:MGI:88140]	Bcl3	32.7402	33.4396	33.2306	22.7618	25.4658	28.2219		-0.313875	0.0225261	0.0019612
	ENSMUSG00000028792	adenylate kinase 2 [Source:MGI Symbol;Acc:MGI:87978]	Ak2	242.997	245.862	254.82	320.67	275.412	270.534		0.1668	0.0225383	0.00197302
	ENSMUSG00000027811	RIKEN cDNA 4930579G24 gene [Source:MGI Symbol;Acc:MGI:1923189]	4930579G24Rik	32.5197	29.1475	30.2463	42.3512	38.9543	33.07		0.2824	0.0225383	0.00197568
	ENSMUSG00000032561	acid phosphatase, prostate [Source:MGI Symbol;Acc:MGI:1928480]	Acpp	44.8335	40.4296	31.7041	6.8431	21.4965	22.9221		-0.850397	0.0225383	0.00197665
	ENSMUSG00000024294	mindbomb E3 ubiquitin protein ligase 1 [Source:MGI Symbol;Acc:MGI:2443157]	Mib1	27.314	23.1506	24.8628	23.3461	21.4675	21.3191		-0.192291	0.0225383	0.00196881
	ENSMUSG00000008855	histone deacetylase 5 [Source:MGI Symbol;Acc:MGI:1333784]	Hdac5	6.56032	5.20073	6.59152	15.7753	8.64441	7.48378		0.475379	0.0225383	0.00196708
	ENSMUSG00000093661	eukaryotic translation initiation factor 4E member 3 [Source:MGI Symbol;Acc:MGI:1914142]	Eif4e3	74.4444	68.5844	72.826	89.8997	82.5952	78.8684		0.195058	0.0226374	0.00198823
	ENSMUSG00000029598	phospholipase B domain containing 2 [Source:MGI Symbol;Acc:MGI:1919022]	Plbd2	23.2081	23.5555	24.6752	22.7121	20.586	20.5783		-0.196668	0.0226488	0.00199212
	ENSMUSG00000028567	thioredoxin domain containing 12 (endoplasmic reticulum) [Source:MGI Symbol;Acc:MGI:1913323]	Txndc12	39.194	42.8655	45.3327	49.5617	49.9173	49.8827		0.215643	0.0227942	0.00200782
	ENSMUSG00000029408	ATP-binding cassette, sub-family B (MDR/TAP), member 9 [Source:MGI Symbol;Acc:MGI:1861729]	Abcb9	87.2785	95.3033	92.5578	83.21	78.7062	81.1006		-0.181797	0.0228529	0.00201591
	ENSMUSG00000052632	ArfGAP with SH3 domain, ankyrin repeat and PH domain 2 [Source:MGI Symbol;Acc:MGI:2685438]	Asap2	5.13981	3.90249	4.57788	2.75159	3.12712	3.55333		-0.451714	0.022859	0.00201937
	ENSMUSG00000021675	coagulation factor II (thrombin) receptor-like 2 [Source:MGI Symbol;Acc:MGI:1298208]	F2rl2	168.532	178.945	177.945	92.1802	135.281	136.455		-0.411093	0.0228761	0.00202379
	ENSMUSG00000040254	sema domain, immunoglobulin domain (Ig), short basic domain, secreted, (semaphorin) 3D [Source:MGI Symbol;Acc:MGI:1860118]	Sema3d	0.631206	0.584394	0.417281	0.131969	0.223911	0.299543		-0.961148	0.0229296	0.00203145
	ENSMUSG00000014956	protein phosphatase 1 catalytic subunit beta [Source:MGI Symbol;Acc:MGI:104871]	Ppp1cb	78.0394	72.7008	77.9716	94.895	83.5019	83.0534		0.154469	0.0230588	0.00204586
	ENSMUSG00000031442	mcf.2 transforming sequence-like [Source:MGI Symbol;Acc:MGI:103263]	Mcf2l	4.57844	4.83563	5.12903	2.19368	3.96493	3.66402		-0.433487	0.0230588	0.00204879
	ENSMUSG00000026123	pleckstrin homology domain containing, family B (evectins) member 2 [Source:MGI Symbol;Acc:MGI:2385825]	Plekhb2	42.5474	42.2064	40.8325	31.9691	37.3029	35.3739		-0.191874	0.0231497	0.00205982
	ENSMUSG00000049502	deltex 3-like, E3 ubiquitin ligase [Source:MGI Symbol;Acc:MGI:2656973]	Dtx3l	83.6541	78.1844	83.4484	110.202	90.1537	92.4832		0.194109	0.0232049	0.00206769
	ENSMUSG00000029217	tec protein tyrosine kinase [Source:MGI Symbol;Acc:MGI:98662]	Tec	28.1793	29.2403	26.3216	18.2447	23.4524	20.8688		-0.309401	0.0234835	0.00210125
	ENSMUSG00000020474	polymerase (DNA directed), mu [Source:MGI Symbol;Acc:MGI:1860191]	Polm	27.4533	24.5913	26.1828	23.566	21.702	22.0326		-0.225706	0.0234835	0.00209999
	ENSMUSG00000020260	protein O-fucosyltransferase 2 [Source:MGI Symbol;Acc:MGI:1916863]	Pofut2	21.4655	22.5327	22.3077	18.7173	19.421	19.0826		-0.189883	0.0234835	0.00210451
	ENSMUSG00000042050	dynein 2 intermediate chain 1 [Source:MGI Symbol;Acc:MGI:2445085]	Dync2i1	3.3163	2.8715	3.05544	2.06683	2.03189	2.51205		-0.436488	0.0234835	0.00210427
	ENSMUSG00000028468	RAB6A GEF compex partner 1 [Source:MGI Symbol;Acc:MGI:1915956]	Rgp1	43.3678	38.985	43.2609	37.5305	34.9262	37.2344		-0.207229	0.023521	0.00211302
	ENSMUSG00000046519	golgi phosphoprotein 3-like [Source:MGI Symbol;Acc:MGI:1917129]	Golph3l	30.8789	31.2211	32.4786	39.3483	36.834	34.4758		0.194272	0.023521	0.00211388
	ENSMUSG00000066568	LSM14A mRNA processing body assembly factor [Source:MGI Symbol;Acc:MGI:1914320]	Lsm14a	84.8795	86.51	89.084	102.204	95.1709	93.0749		0.134045	0.0235808	0.00212854
	ENSMUSG00000023277	twinfilin actin binding protein 2 [Source:MGI Symbol;Acc:MGI:1346078]	Twf2	66.1521	68.9662	72.9355	109.78	84.3893	74.2874		0.232399	0.0235808	0.00213314
	ENSMUSG00000023072	centrosomal protein 89 [Source:MGI Symbol;Acc:MGI:1919390]	Cep89	14.4543	15.3495	14.0046	19.7952	16.8589	16.0634		0.240238	0.0235808	0.0021343
	ENSMUSG00000097006	RIKEN cDNA 9530082P21 gene [Source:MGI Symbol;Acc:MGI:3603340]	9530082P21Rik	2.33626	2.23974	2.49149	1.50965	1.61469	1.80321		-0.492699	0.0235808	0.00212531
	ENSMUSG00000036067	solute carrier family 2 (facilitated glucose transporter), member 6 [Source:MGI Symbol;Acc:MGI:2443286]	Slc2a6	0.21569	0	0.152311	0.392495	0.674268	0.313747		2.15451	0.0235808	0.00212834
	ENSMUSG00000015291	guanosine diphosphate (GDP) dissociation inhibitor 1 [Source:MGI Symbol;Acc:MGI:99846]	Gdi1	71.0959	58.2472	62.0068	51.9258	51.4614	48.1521		-0.313207	0.0236892	0.00214713
	ENSMUSG00000040339	family with sequence similarity 102, member B [Source:MGI Symbol;Acc:MGI:3036259]	Fam102b	25.7299	23.6641	26.7037	41.4648	29.2372	30.0949		0.26514	0.0237188	0.00216141
	ENSMUSG00000017724	ets variant 4 [Source:MGI Symbol;Acc:MGI:99423]	Etv4	18.7797	17.2484	14.9421	9.29796	13.679	10.8187		-0.417638	0.0237188	0.00216151
	ENSMUSG00000112478	predicted gene, 47761 [Source:MGI Symbol;Acc:MGI:6096912]	Gm47761	2.10847	1.78731	1.72525	0.475033	1.29035	0.649104		-1.01921	0.0237188	0.00216103
	ENSMUSG00000104213	immunoglobulin heavy constant delta [Source:MGI Symbol;Acc:MGI:96447]	Ighd	0.121505	0	0.0429011	1.39296	0.253225	0.235659		2.33257	0.0237188	0.00216193
	ENSMUSG00000020661	DNA methyltransferase 3A [Source:MGI Symbol;Acc:MGI:1261827]	Dnmt3a	21.1481	18.5138	20.2727	17.1529	16.8692	18.1406		-0.182661	0.0238419	0.0021762
	ENSMUSG00000029366	deoxycytidine kinase [Source:MGI Symbol;Acc:MGI:102726]	Dck	91.5259	86.6511	96.3657	122.463	102.181	102.109		0.1789	0.0238933	0.00219178
	ENSMUSG00000073838	Tu translation elongation factor, mitochondrial [Source:MGI Symbol;Acc:MGI:1923686]	Tufm	73.0605	74.6715	78.5584	73.6608	66.7919	66.1619		-0.170333	0.0238933	0.00218937
	ENSMUSG00000074925	protein prenyltransferase alpha subunit repeat containing 1 [Source:MGI Symbol;Acc:MGI:1921875]	Ptar1	21.6803	18.4111	19.5731	18.2896	17.9343	16.3145		-0.176229	0.0238933	0.00218964
	ENSMUSG00000035901	DENN/MADD domain containing 5A [Source:MGI Symbol;Acc:MGI:1201681]	Dennd5a	11.7466	11.2748	12.0338	21.2059	14.5969	13.7262		0.33735	0.0238933	0.00219309
	ENSMUSG00000021760	glutathione peroxidase 8 (putative) [Source:MGI Symbol;Acc:MGI:1916840]	Gpx8	15.6403	14.4874	12.6001	3.9685	9.2966	8.7585		-0.672567	0.0242742	0.00223115
	ENSMUSG00000074151	NLR family, CARD domain containing 5 [Source:MGI Symbol;Acc:MGI:3612191]	Nlrc5	161.559	132.866	152.563	153.883	126.188	127.688		-0.191895	0.0244014	0.00225258
	ENSMUSG00000017664	solute carrier family 35, member C2 [Source:MGI Symbol;Acc:MGI:2385166]	Slc35c2	62.8466	61.3654	63.9767	53.1941	55.3162	56.8556		-0.161219	0.0244014	0.00225448
	ENSMUSG00000042404	DENN/MADD domain containing 4B [Source:MGI Symbol;Acc:MGI:2446201]	Dennd4b	34.9487	29.9255	32.9508	31.3873	26.9443	27.8778		-0.216384	0.0244014	0.00224996
	ENSMUSG00000044037	ALS2 C-terminal like [Source:MGI Symbol;Acc:MGI:2447532]	Als2cl	22.4464	23.6928	20.1044	15.5101	16.8881	14.9555		-0.406401	0.0244014	0.00225648
	ENSMUSG00000019326	amine oxidase, copper containing 3 [Source:MGI Symbol;Acc:MGI:1306797]	Aoc3	0.499589	0.419964	0.352789	0.354553	0.130147	0.145343		-1.28183	0.0244014	0.00225841
	ENSMUSG00000110830	predicted gene, 46218 [Source:MGI Symbol;Acc:MGI:5825855]	Gm46218	0.357093	0.397295	0.409766	0.097471	0.0465127	0.216431		-1.70623	0.0245685	0.00227702
	ENSMUSG00000047434	xyloside xylosyltransferase 1 [Source:MGI Symbol;Acc:MGI:2146443]	Xxylt1	18.8185	18.8746	20.174	23.5234	21.6477	22.9624		0.209137	0.024663	0.00228892
	ENSMUSG00000035725	protein kinase, X-linked [Source:MGI Symbol;Acc:MGI:1309999]	Prkx	51.7219	51.4459	51.431	37.6766	43.8293	46.3211		-0.201778	0.0247157	0.00229697
	ENSMUSG00000020689	integrin beta 3 [Source:MGI Symbol;Acc:MGI:96612]	Itgb3	14.1818	15.2247	14.6973	7.34695	11.0681	11.5903		-0.418834	0.0247419	0.00230256
	ENSMUSG00000028465	talin 1 [Source:MGI Symbol;Acc:MGI:1099832]	Tln1	261.293	254.437	276.406	265.176	240.036	228.067		-0.157128	0.0247942	0.00231147
	ENSMUSG00000034317	tripartite motif-containing 59 [Source:MGI Symbol;Acc:MGI:1914199]	Trim59	114.845	105.233	110.912	151.973	119.313	121.088		0.172401	0.0247942	0.00232009
	ENSMUSG00000028551	cyclin dependent kinase inhibitor 2C [Source:MGI Symbol;Acc:MGI:105388]	Cdkn2c	45.854	46.7504	51.3774	83.6603	55.439	56.8858		0.264845	0.0247942	6.01427
	ENSMUSG00000069206	zinc finger protein 874a [Source:MGI Symbol;Acc:MGI:3040703]	Zfp874a	1.95441	1.89893	1.79174	3.42544	2.46531	2.42729		0.472377	0.0247942	0.00231774
	ENSMUSG00000041954	tumor necrosis factor receptor superfamily, member 18 [Source:MGI Symbol;Acc:MGI:894675]	Tnfrsf18	124.368	126.441	123.926	149.681	144.038	141.171		0.219704	0.0248049	0.00232426
	ENSMUSG00000001366	f-box protein 9 [Source:MGI Symbol;Acc:MGI:1918788]	Fbxo9	45.0858	43.3373	42.9757	33.8734	38.9182	36.2905		-0.205119	0.0249786	0.00234691
	ENSMUSG00000030336	CD27 antigen [Source:MGI Symbol;Acc:MGI:88326]	Cd27	17.1559	13.583	17.0167	51.2674	21.907	24.1859		0.627894	0.0249786	11.7354
	ENSMUSG00000023015	Rac GTPase-activating protein 1 [Source:MGI Symbol;Acc:MGI:1349423]	Racgap1	117.175	122.219	126.431	170.022	135.285	133.174		0.173037	0.0250006	0.00235536
	ENSMUSG00000024431	nuclear receptor subfamily 3, group C, member 1 [Source:MGI Symbol;Acc:MGI:95824]	Nr3c1	21.9023	19.4915	20.5902	30.917	23.7934	22.3614		0.22307	0.0250006	0.00235458
	ENSMUSG00000007817	zinc finger, MIZ-type containing 1 [Source:MGI Symbol;Acc:MGI:3040693]	Zmiz1	137.017	122.588	137.964	106.597	111.858	111.643		-0.249998	0.0250579	0.00236396
	ENSMUSG00000022797	transferrin receptor [Source:MGI Symbol;Acc:MGI:98822]	Tfrc	347.392	334.033	349.586	430.58	376.598	368.264		0.147093	0.0251964	0.00238305
	ENSMUSG00000004451	v-ral simian leukemia viral oncogene B [Source:MGI Symbol;Acc:MGI:1927244]	Ralb	6.34515	8.4054	6.91116	3.75789	5.61153	5.15414		-0.424561	0.0251964	0.00238346
	ENSMUSG00000046330	ribosomal protein L37a [Source:MGI Symbol;Acc:MGI:98068]	Rpl37a	607.195	640.569	605.675	735.175	684.669	696.476		0.193884	0.025228	0.00239659
	ENSMUSG00000037754	protein phosphatase 1, regulatory subunit 16B [Source:MGI Symbol;Acc:MGI:2151841]	Ppp1r16b	81.1561	87.9662	83.3738	60.0794	71.5925	70.8788		-0.243628	0.025228	0.00239308
	ENSMUSG00000049764	zinc finger protein 280B [Source:MGI Symbol;Acc:MGI:1927865]	Zfp280b	41.4302	39.8366	44.3136	67.1163	51.6908	45.2123		0.248227	0.025228	0.00239238
	ENSMUSG00000031239	integral membrane protein 2A [Source:MGI Symbol;Acc:MGI:107706]	Itm2a	5.29496	6.02199	7.7586	13.2245	10.3454	9.94861		0.624162	0.025228	0.00239933
	ENSMUSG00000052485	transmembrane protein 171 [Source:MGI Symbol;Acc:MGI:2685751]	Tmem171	12.1774	16.3698	12.6156	3.02536	8.81409	8.27337		-0.750581	0.0252551	0.00241158
	ENSMUSG00000083481	ribosomal protein S8, pseudogene 2 [Source:MGI Symbol;Acc:MGI:3649696]	Rps8-ps2	1.29489	1.09765	0.391885	2.01971	3.46967	2.51143		2.08511	0.0252551	0.00241103
	ENSMUSG00000030187	killer cell lectin-like receptor, subfamily A, member 2 [Source:MGI Symbol;Acc:MGI:101906]	Klra2	0.729801	0.601454	0.601248	0	0.190119	0.235907		-1.68449	0.0252551	0.00240556
	ENSMUSG00000026094	serine/threonine kinase 17b (apoptosis-inducing) [Source:MGI Symbol;Acc:MGI:2138162]	Stk17b	267.504	257.814	264.234	327.775	276.15	294.299		0.148575	0.0252685	0.00244092
	ENSMUSG00000030161	gamma-aminobutyric acid (GABA) A receptor-associated protein-like 1 [Source:MGI Symbol;Acc:MGI:1914980]	Gabarapl1	95.7044	99.6384	98.276	120.207	110.961	113.94		0.223934	0.0252685	0.0024318
	ENSMUSG00000042694	STN1, CST complex subunit [Source:MGI Symbol;Acc:MGI:1915581]	Stn1	31.4472	32.2854	32.2622	25.6422	26.0487	28.6141		-0.226411	0.0252685	0.00243592
	ENSMUSG00000033429	methylmalonyl CoA epimerase [Source:MGI Symbol;Acc:MGI:1920974]	Mcee	13.8854	13.2545	13.6422	17.0061	18.7469	16.1584		0.373304	0.0252685	0.00243683
	ENSMUSG00000037151	leucine rich repeat containing 20 [Source:MGI Symbol;Acc:MGI:2387182]	Lrrc20	14.5006	15.4764	15.9678	12.8538	12.5668	12.7392		-0.27807	0.0252685	0.00244189
	ENSMUSG00000082741	predicted gene 9703 [Source:MGI Symbol;Acc:MGI:3780110]	Gm9703	6.33865	10.2279	4.47609	11.656	15.9912	10.9997		1.20858	0.0252685	0.0024209
	ENSMUSG00000034574	dishevelled associated activator of morphogenesis 1 [Source:MGI Symbol;Acc:MGI:1914596]	Daam1	3.57868	3.60968	3.63461	3.03555	2.89711	2.54404		-0.376389	0.0252685	0.00242919
	ENSMUSG00000064043	transcriptional regulating factor 1 [Source:MGI Symbol;Acc:MGI:2442086]	Trerf1	1.1963	1.04465	1.42893	2.26493	2.00249	1.54269		0.50033	0.0252685	0.00242618
	ENSMUSG00000029861	family with sequence similarity 131, member B [Source:MGI Symbol;Acc:MGI:1923406]	Fam131b	0.0562525	0.0278158	0.0397232	0.0921272	0.117234	0.190927		1.62656	0.0252685	0.00243243
	ENSMUSG00000020009	interferon gamma receptor 1 [Source:MGI Symbol;Acc:MGI:107655]	Ifngr1	257.376	239.218	267.154	428.112	297.262	295.434		0.268647	0.0254303	0.00247005
	ENSMUSG00000031511	Rho guanine nucleotide exchange factor (GEF7) [Source:MGI Symbol;Acc:MGI:1860493]	Arhgef7	30.3519	31.9729	30.4296	21.7143	26.907	26.8456		-0.208025	0.0254303	0.00247051
	ENSMUSG00000043099	hypermethylated in cancer 1 [Source:MGI Symbol;Acc:MGI:1338010]	Hic1	9.97317	12.5724	13.3028	21.005	17.3206	14.2087		0.399347	0.0254303	0.00246961
	ENSMUSG00000105124	predicted gene 5297 [Source:MGI Symbol;Acc:MGI:3646414]	Gm5297	0.887166	0.974859	0.487262	0.968634	1.43804	1.62506		1.17192	0.0254303	0.00246681
	ENSMUSG00000024065	EH-domain containing 3 [Source:MGI Symbol;Acc:MGI:1928900]	Ehd3	14.0635	10.5487	13.8091	17.6419	16.3971	15.4303		0.316314	0.025492	0.00247976
	ENSMUSG00000061950	protein phosphatase 4, regulatory subunit 1 [Source:MGI Symbol;Acc:MGI:1917601]	Ppp4r1	45.4179	44.5604	46.0141	39.4581	39.1374	41.1884		-0.168209	0.0255916	0.00249598
	ENSMUSG00000029814	insulin-like growth factor 2 mRNA binding protein 3 [Source:MGI Symbol;Acc:MGI:1890359]	Igf2bp3	11.983	10.8993	11.6289	2.96578	7.81339	8.58845		-0.618004	0.0255916	0.00249496
	ENSMUSG00000029863	caspase 2 [Source:MGI Symbol;Acc:MGI:97295]	Casp2	37.9315	34.6819	37.8741	58.0592	41.3666	40.6542		0.210006	0.0256646	0.00250966
	ENSMUSG00000041135	receptor (TNFRSF)-interacting serine-threonine kinase 2 [Source:MGI Symbol;Acc:MGI:1891456]	Ripk2	36.8098	32.0658	33.9247	28.5537	29.6433	28.0242		-0.222979	0.0256646	0.00250693
	ENSMUSG00000001127	Araf proto-oncogene, serine/threonine kinase [Source:MGI Symbol;Acc:MGI:88065]	Araf	44.8062	43.2645	43.3792	40.1346	38.3777	38.2653		-0.164102	0.0256924	0.00251565
	ENSMUSG00000041248	potassium inwardly-rectifying channel, subfamily J, member 1 [Source:MGI Symbol;Acc:MGI:1927248]	Kcnj1	0	0.0342502	0	0.189064	0.0360882	0.100754		2.21162	0.0257531	0.00252489
	ENSMUSG00000003644	ribosomal protein S6 kinase polypeptide 1 [Source:MGI Symbol;Acc:MGI:104558]	Rps6ka1	255.421	266.141	265.192	223.172	233.587	234.286		-0.159898	0.0258516	0.00254774
	ENSMUSG00000034390	c-Maf inducing protein [Source:MGI Symbol;Acc:MGI:1921690]	Cmip	54.0274	51.8316	54.6676	49.1507	49.9462	44.8441		-0.160633	0.0258516	0.00254768
	ENSMUSG00000078300	predicted pseudogene 2606 [Source:MGI Symbol;Acc:MGI:3780774]	Gm2606	7.37278	5.92426	5.36905	7.42093	10.2036	8.15516		0.639394	0.0258516	0.00254229
	ENSMUSG00000039131	GIPC PDZ domain containing family, member 2 [Source:MGI Symbol;Acc:MGI:1889209]	Gipc2	3.09698	3.24121	2.73901	0.59092	1.87989	1.8078		-0.785682	0.0258516	0.00254501
	ENSMUSG00000031353	retinoblastoma binding protein 7, chromatin remodeling factor [Source:MGI Symbol;Acc:MGI:1194910]	Rbbp7	455.729	457.566	475.314	554.073	507.012	497.314		0.137322	0.0258809	0.00256054
	ENSMUSG00000097080	RIKEN cDNA 1700086O06 gene [Source:MGI Symbol;Acc:MGI:1920766]	1700086O06Rik	3.41678	4.50542	4.38323	2.98443	2.3736	2.70595		-0.682644	0.0258809	0.00256012
	ENSMUSG00000094786	predicted gene 14403 [Source:MGI Symbol;Acc:MGI:3649813]	Gm14403	0.766746	0.896152	0.738333	0.761051	0.072634	0.270382		-1.945	0.0258809	0.00255668
	ENSMUSG00000025060	STE20-like kinase [Source:MGI Symbol;Acc:MGI:103241]	Slk	91.6286	85.0432	88.2917	75.8804	78.3215	78.796		-0.155441	0.0259554	0.00258117
	ENSMUSG00000047959	potassium voltage-gated channel, shaker-related subfamily, member 3 [Source:MGI Symbol;Acc:MGI:96660]	Kcna3	28.281	26.6484	30.8134	50.4253	36.9952	32.8987		0.319663	0.0259554	0.00257796
	ENSMUSG00000023915	tumor necrosis factor receptor superfamily, member 21 [Source:MGI Symbol;Acc:MGI:2151075]	Tnfrsf21	22.7826	23.2535	23.0114	16.6854	19.9348	18.906		-0.247029	0.0259554	0.0025802
	ENSMUSG00000030545	peroxisomal biogenesis factor 11 alpha [Source:MGI Symbol;Acc:MGI:1338788]	Pex11a	6.78361	7.39036	6.3273	2.17839	4.9519	4.67874		-0.547505	0.0259554	0.0025797
	ENSMUSG00000043467	zinc finger and BTB domain containing 37 [Source:MGI Symbol;Acc:MGI:2444467]	Zbtb37	4.39903	3.96822	4.23287	4.16661	3.4907	3.56983		-0.212123	0.0261367	0.00260253
	ENSMUSG00000020485	SPT4A, DSIF elongation factor subunit [Source:MGI Symbol;Acc:MGI:107416]	Supt4a	133.811	134.273	141.045	157.471	159.482	152.103		0.194973	0.0261795	0.00261014
	ENSMUSG00000022881	replication factor C (activator 1) 4 [Source:MGI Symbol;Acc:MGI:2146571]	Rfc4	106.018	103.135	109.533	140.992	116.673	122.234		0.193559	0.0262126	0.00261678
	ENSMUSG00000097530	KAT8 regulatory NSL complex subunit 2, pseudogene [Source:MGI Symbol;Acc:MGI:3648525]	Kansl2-ps	2.76527	3.43796	3.34752	1.46647	1.31726	2.45176		-0.855912	0.0265148	0.00265033
	ENSMUSG00000002222	required for meiotic nuclear division 5 homolog A [Source:MGI Symbol;Acc:MGI:1915727]	Rmnd5a	43.6501	40.2567	41.6633	61.4078	47.3822	45.531		0.211258	0.0265489	0.00265713
	ENSMUSG00000026979	pleckstrin and Sec7 domain containing 4 [Source:MGI Symbol;Acc:MGI:2674093]	Psd4	121.737	112.277	116.251	101.393	102.422	105.062		-0.154167	0.0265965	0.00266976
	ENSMUSG00000045302	prolactin regulatory element binding [Source:MGI Symbol;Acc:MGI:1355326]	Preb	47.7797	44.1486	45.6915	38.9856	41.7958	39.1138		-0.164671	0.0265965	0.00267209
	ENSMUSG00000038930	RCC1 domain containing 1 [Source:MGI Symbol;Acc:MGI:2444156]	Rccd1	3.21573	2.65983	2.86949	2.69711	2.11716	2.23961		-0.35869	0.0265965	0.0026709
	ENSMUSG00000001767	crooked neck pre-mRNA splicing factor 1 [Source:MGI Symbol;Acc:MGI:1914127]	Crnkl1	58.8261	57.9392	59.3952	69.1132	63.9585	63.4237		0.140996	0.0266494	0.0026808
	ENSMUSG00000066640	F-box and leucine-rich repeat protein 18 [Source:MGI Symbol;Acc:MGI:2444450]	Fbxl18	5.42907	4.61852	5.73176	5.24516	4.24295	4.33828		-0.289758	0.026658	0.00268507
	ENSMUSG00000029370	Ras association (RalGDS/AF-6) domain family member 6 [Source:MGI Symbol;Acc:MGI:1920496]	Rassf6	0.812888	0.937902	0.841908	0.0887535	0.395293	0.367871		-1.29891	0.0268035	0.00270315
	ENSMUSG00000080776	predicted gene 12174 [Source:MGI Symbol;Acc:MGI:3651722]	Gm12174	14.1981	16.2879	17.5456	18.9123	25.2992	20.9281		0.467461	0.0269978	0.00272619
	ENSMUSG00000022680	pyridoxal-dependent decarboxylase domain containing 1 [Source:MGI Symbol;Acc:MGI:1920909]	Pdxdc1	39.487	35.853	39.5681	29.9875	32.6847	35.1142		-0.19165	0.0270408	0.00273398
	ENSMUSG00000030541	isocitrate dehydrogenase 2 (NADP+), mitochondrial [Source:MGI Symbol;Acc:MGI:96414]	Idh2	20.0709	18.3055	19.8426	27.7091	23.2384	21.6263		0.246542	0.0270537	0.00273874
	ENSMUSG00000007038	neuraminidase 1 [Source:MGI Symbol;Acc:MGI:97305]	Neu1	17.8108	17.339	20.2197	13.5719	14.4673	15.5628		-0.343186	0.0270999	0.00274687
	ENSMUSG00000054932	alpha fetoprotein [Source:MGI Symbol;Acc:MGI:87951]	Afp	15.4912	17.2183	17.1349	6.96009	14.2138	12.264		-0.415097	0.0275722	0.00279827
	ENSMUSG00000096910	zinc finger protein 955B [Source:MGI Symbol;Acc:MGI:4834573]	Zfp955b	7.19943	6.88328	6.47815	8.64442	8.08391	7.60049		0.260459	0.0276051	0.00280513
	ENSMUSG00000026970	RNA binding motif, single stranded interacting protein 1 [Source:MGI Symbol;Acc:MGI:1861774]	Rbms1	203.126	197.192	204.636	165.868	175.885	182.909		-0.170109	0.0277381	0.00282843
	ENSMUSG00000029191	replication factor C (activator 1) 1 [Source:MGI Symbol;Acc:MGI:97891]	Rfc1	81.1136	79.0807	80.5102	99.9072	86.8803	84.7575		0.134836	0.0277381	0.00282927
	ENSMUSG00000067722	cDNA sequence BC003965 [Source:MGI Symbol;Acc:MGI:2670966]	BC003965	31.9299	30.8063	33.1921	29.9975	25.6503	28.0835		-0.240111	0.0277381	0.00282598
	ENSMUSG00000047139	CD24a antigen [Source:MGI Symbol;Acc:MGI:88323]	Cd24a	0.492144	0.353972	0.25275	0.879279	0.606072	0.694189		1.08452	0.0277466	0.588745
	ENSMUSG00000030775	T cell receptor associated transmembrane adaptor 1 [Source:MGI Symbol;Acc:MGI:1924897]	Trat1	0.0742316	0.097883	0.22715	0.648386	0.618814	0.263948		1.45421	0.0277543	0.00283801
	ENSMUSG00000001588	ArfGAP with coiled-coil, ankyrin repeat and PH domains 1 [Source:MGI Symbol;Acc:MGI:2388270]	Acap1	189.473	176.663	178.815	171.425	158.428	154.483		-0.176764	0.0277748	0.00284669
	ENSMUSG00000020777	acyl-Coenzyme A oxidase 1, palmitoyl [Source:MGI Symbol;Acc:MGI:1330812]	Acox1	13.2647	12.6466	13.858	12.722	10.1773	10.9691		-0.307798	0.0277748	0.0028472
	ENSMUSG00000039741	BAH domain and coiled-coil containing 1 [Source:MGI Symbol;Acc:MGI:2679272]	Bahcc1	0.342615	0.420975	0.608517	0.124692	0.281285	0.231568		-1.04022	0.0278943	0.00286301
	ENSMUSG00000036644	TBC1 domain family, member 9B [Source:MGI Symbol;Acc:MGI:1924045]	Tbc1d9b	31.1333	29.3158	31.5449	26.3469	28.3446	25.6992		-0.180085	0.0281062	0.00288834
	ENSMUSG00000050157	predicted gene 867 [Source:MGI Symbol;Acc:MGI:2685713]	Gm867	9.49385	5.76358	6.83692	3.18154	4.01593	4.8312		-0.697484	0.0281134	0.00289267
	ENSMUSG00000058748	zinc finger protein 958 [Source:MGI Symbol;Acc:MGI:2385298]	Zfp958	29.3946	27.7664	27.3431	34.3864	32.9198	30.8256		0.225253	0.0282242	0.0029137
	ENSMUSG00000045763	brain abundant, membrane attached signal protein 1 [Source:MGI Symbol;Acc:MGI:1917600]	Basp1	27.5791	30.9682	31.4038	9.40991	27.5409	16.2697		-0.609025	0.0282242	0.00291849
	ENSMUSG00000030681	major vault protein [Source:MGI Symbol;Acc:MGI:1925638]	Mvp	20.7039	22.5259	22.0693	16.1441	19.4293	18.4631		-0.211035	0.0282242	0.00291302
	ENSMUSG00000112148	leukocyte immunoglobulin-like receptor, subfamily B, member 4A [Source:MGI Symbol;Acc:MGI:102701]	Lilrb4a	13.0513	10.1991	9.73092	7.28163	8.56034	6.40318		-0.468904	0.0282242	0.00291561
	ENSMUSG00000001248	GRAM domain containing 1A [Source:MGI Symbol;Acc:MGI:105490]	Gramd1a	155.728	134.006	143.078	135.604	120.764	114.716		-0.247726	0.0285809	0.00295902
	ENSMUSG00000026009	inducible T cell co-stimulator [Source:MGI Symbol;Acc:MGI:1858745]	Icos	125.728	117.418	117.681	77.3817	96.962	107.304		-0.250686	0.0285919	0.00297111
	ENSMUSG00000034653	YTH domain containing 2 [Source:MGI Symbol;Acc:MGI:2448561]	Ythdc2	16.4083	14.8128	16.1041	14.6926	13.8328	13.8063		-0.172961	0.0285919	0.00297074
	ENSMUSG00000021714	centromere protein K [Source:MGI Symbol;Acc:MGI:1926210]	Cenpk	10.9671	11.0643	11.4687	15.5158	12.3478	13.7381		0.247343	0.0285919	0.0029679
	ENSMUSG00000037692	AT hook, DNA binding motif, containing 1 [Source:MGI Symbol;Acc:MGI:2444218]	Ahdc1	22.8017	23.0367	23.1678	19.3433	20.085	19.0629		-0.219489	0.0286005	0.00297565
	ENSMUSG00000085028	Slc2a4 regulator, pseudogene [Source:MGI Symbol;Acc:MGI:3651388]	Slc2a4rg-ps	27.8879	20.5604	22.7883	23.0801	17.2986	14.895		-0.459515	0.0286385	0.00298327
	ENSMUSG00000055170	interferon gamma [Source:MGI Symbol;Acc:MGI:107656]	Ifng	41.0022	55.4472	43.8088	17.323	33.1588	35.0941		-0.489786	0.0287307	0.00300754
	ENSMUSG00000038290	Smg-6 homolog, nonsense mediated mRNA decay factor (C. elegans) [Source:MGI Symbol;Acc:MGI:2144117]	Smg6	21.0295	22.58	23.4806	30.2663	25.8265	24.5382		0.191325	0.0287307	0.00300084
	ENSMUSG00000033577	myosin VI [Source:MGI Symbol;Acc:MGI:104785]	Myo6	8.65869	8.90338	9.0029	4.46604	6.96118	7.12703		-0.38445	0.0287307	0.00300429
	ENSMUSG00000046447	calcium/calmodulin-dependent protein kinase II inhibitor 1 [Source:MGI Symbol;Acc:MGI:1913509]	Camk2n1	8.44167	6.11367	7.2451	3.11955	5.0343	5.44073		-0.51439	0.0287307	0.00299885
	ENSMUSG00000031137	fibroblast growth factor 13 [Source:MGI Symbol;Acc:MGI:109178]	Fgf13	10.914	9.94143	11.0941	17.0904	12.121	12.9791		0.274412	0.0288486	0.00302356
	ENSMUSG00000027699	ect2 oncogene [Source:MGI Symbol;Acc:MGI:95281]	Ect2	61.2298	63.161	65.0159	82.9046	71.1508	68.1063		0.17007	0.0288738	0.00303726
	ENSMUSG00000022582	lymphocyte antigen 6 complex, locus G [Source:MGI Symbol;Acc:MGI:109440]	Ly6g	27.2033	52.9577	42.3136	2.6758	24.8991	19.607		-1.144	0.0288738	0.00303616
	ENSMUSG00000020042	BTB (POZ) domain containing 11 [Source:MGI Symbol;Acc:MGI:1921257]	Btbd11	0.621273	0.295829	0.625578	1.62044	0.887159	0.903715		0.837843	0.0288738	0.00303058
	ENSMUSG00000105196	microRNA 142 [Source:MGI Symbol;Acc:MGI:2676827]	Mir142	243.485	156.965	161.75	131.938	112.764	99.6947		-0.657485	0.02888	0.00304353
	ENSMUSG00000042271	nuclear transport factor 2-like export factor 2 [Source:MGI Symbol;Acc:MGI:2147914]	Nxt2	7.01449	7.65593	6.95521	9.44431	8.9757	8.45879		0.324962	0.02888	0.00304529
	ENSMUSG00000105826	predicted gene, 42141 [Source:MGI Symbol;Acc:MGI:5625026]	Gm42141	15.9965	12.7716	13.0599	9.98028	9.69122	10.8227		-0.386982	0.0289452	0.00305586
	ENSMUSG00000030104	ER degradation enhancer, mannosidase alpha-like 1 [Source:MGI Symbol;Acc:MGI:2180139]	Edem1	239.786	222.987	236.528	182.59	207.236	207.934		-0.173242	0.0291394	0.00308261
	ENSMUSG00000022898	VPS26 endosomal protein sorting factor C [Source:MGI Symbol;Acc:MGI:1206040]	Vps26c	31.6294	30.9386	32.1612	36.763	34.8572	35.5156		0.170406	0.0291394	0.0030838
	ENSMUSG00000054099	solute carrier family 25, member 40 [Source:MGI Symbol;Acc:MGI:2442486]	Slc25a40	11.6311	10.8902	11.6932	9.84375	10.1837	9.15686		-0.228762	0.0291477	0.0030884
	ENSMUSG00000021003	galactosylceramidase [Source:MGI Symbol;Acc:MGI:95636]	Galc	1.82311	1.94876	1.99411	1.34678	1.6168	1.46703		-0.337406	0.0291631	0.00309375
	ENSMUSG00000099413	predicted gene, 17767 [Source:MGI Symbol;Acc:MGI:5009931]	Gm17767	43.3407	34.5423	38.6767	35.1579	29.2921	33.2804		-0.275243	0.029238	0.0031129
	ENSMUSG00000039738	SLX4 structure-specific endonuclease subunit homolog (S. cerevisiae) [Source:MGI Symbol;Acc:MGI:106299]	Slx4	39.4516	32.0388	35.577	32.9847	30.4122	29.969		-0.203664	0.029238	0.00310932
	ENSMUSG00000031995	suppression of tumorigenicity 14 (colon carcinoma) [Source:MGI Symbol;Acc:MGI:1338881]	St14	12.7114	12.8401	13.5871	18.9779	16.0334	14.115		0.237523	0.029238	0.00310893
	ENSMUSG00000033326	lysine (K)-specific demethylase 4A [Source:MGI Symbol;Acc:MGI:2446210]	Kdm4a	53.3231	53.6427	55.1496	50.8959	49.5107	46.8118		-0.149487	0.029285	0.00312164
	ENSMUSG00000027508	phosphoprotein associated with glycosphingolipid microdomains 1 [Source:MGI Symbol;Acc:MGI:2443160]	Pag1	48.0156	53.3006	52.7701	39.5061	46.3048	44.226		-0.195615	0.0294527	0.00314704
	ENSMUSG00000025280	polymerase (RNA) III (DNA directed) polypeptide A [Source:MGI Symbol;Acc:MGI:2681836]	Polr3a	41.3552	38.9596	41.763	37.5625	37.6036	35.091		-0.15108	0.0294527	0.0031435
	ENSMUSG00000021065	fucosyltransferase 8 [Source:MGI Symbol;Acc:MGI:1858901]	Fut8	35.0439	36.983	37.7852	44.6257	43.1383	37.9359		0.163799	0.0294975	0.00315935
	ENSMUSG00000011158	BRF1, RNA polymerase III transcription initiation factor 90 kDa subunit [Source:MGI Symbol;Acc:MGI:1919558]	Brf1	27.8941	26.1937	27.7777	28.8212	23.6147	23.2414		-0.180774	0.0294975	0.00315875
	ENSMUSG00000079020	solute carrier family 45, member 4 [Source:MGI Symbol;Acc:MGI:2146236]	Slc45a4	6.47259	6.18553	6.23537	5.05846	5.52351	4.92892		-0.248088	0.0295768	0.00317162
	ENSMUSG00000050708	ferritin light polypeptide 1 [Source:MGI Symbol;Acc:MGI:95589]	Ftl1	670.959	792.362	762.016	497.913	671.066	598.116		-0.252325	0.0296538	0.00319349
	ENSMUSG00000022314	RAD21 cohesin complex component [Source:MGI Symbol;Acc:MGI:108016]	Rad21	357.91	359.786	376.3	475.859	394.355	393.661		0.141544	0.0296538	0.003189
	ENSMUSG00000036309	S-phase kinase-associated protein 1 [Source:MGI Symbol;Acc:MGI:103575]	Skp1	184.396	182.98	179.577	208.853	196.825	199.271		0.150584	0.0296538	0.00319502
	ENSMUSG00000089715	chromobox 6 [Source:MGI Symbol;Acc:MGI:3512628]	Cbx6	11.74	10.7388	11.7785	20.6585	13.1971	13.3156		0.280133	0.0296538	0.00318541
	ENSMUSG00000022474	phosphomannomutase 1 [Source:MGI Symbol;Acc:MGI:1353418]	Pmm1	17.9227	19.7961	20.7904	24.9334	22.705	23.4343		0.235482	0.0296649	0.00320572
	ENSMUSG00000111758	predicted gene, 30373 [Source:MGI Symbol;Acc:MGI:5589532]	Gm30373	1.75908	1.3993	1.75527	1.44046	1.21537	0.964183		-0.561565	0.0296649	0.00320758
	ENSMUSG00000032135	melanoma cell adhesion molecule [Source:MGI Symbol;Acc:MGI:1933966]	Mcam	0.137827	0.102229	0.145992	0.112863	0.574481	0.300729		1.41714	0.0296649	0.00320286
	ENSMUSG00000039740	asparagine-linked glycosylation 2 (alpha-1,3-mannosyltransferase) [Source:MGI Symbol;Acc:MGI:1914731]	Alg2	26.5991	24.1878	27.0762	21.2972	23.7426	20.7977		-0.229104	0.0297219	0.00322133
	ENSMUSG00000050855	zinc finger protein 940 [Source:MGI Symbol;Acc:MGI:2446235]	Zfp940	3.03265	2.718	2.60999	3.99405	3.16012	3.56584		0.34878	0.0297219	0.00322024
	ENSMUSG00000028096	G protein-coupled receptor 89 [Source:MGI Symbol;Acc:MGI:1914799]	Gpr89	38.0177	35.4703	39.2595	32.4413	33.8987	32.5486		-0.182537	0.0298286	0.00324432
	ENSMUSG00000022246	retinoic acid induced 14 [Source:MGI Symbol;Acc:MGI:1922896]	Rai14	14.7323	15.2172	15.1041	7.52129	11.4426	12.5933		-0.375348	0.0298286	0.00323884
	ENSMUSG00000037370	ectonucleotide pyrophosphatase/phosphodiesterase 1 [Source:MGI Symbol;Acc:MGI:97370]	Enpp1	2.0707	2.09236	2.2331	1.29016	1.80593	1.46239		-0.424814	0.0298286	0.00324147
	ENSMUSG00000031065	cyclin-dependent kinase 16 [Source:MGI Symbol;Acc:MGI:97516]	Cdk16	42.8974	37.5218	40.6443	40.5035	32.7217	32.9831		-0.250618	0.0298438	2.87225
	ENSMUSG00000099759	RIKEN cDNA 1700030C10 gene [Source:MGI Symbol;Acc:MGI:1916763]	1700030C10Rik	1.13102	0.460572	0.892639	1.01696	0.138654	0.25807		-1.68829	0.0300311	0.00327401
	ENSMUSG00000084796	Mir142 host gene (non-protein coding) [Source:MGI Symbol;Acc:MGI:1925841]	Mir142hg	327.839	234.678	266.959	241.753	209.711	175.189		-0.442462	0.0300444	0.00328135
	ENSMUSG00000037306	mannosidase, alpha, class 1C, member 1 [Source:MGI Symbol;Acc:MGI:2446214]	Man1c1	2.66284	2.55365	2.77785	1.1233	2.1021	1.95627		-0.475405	0.0300444	0.00328313
	ENSMUSG00000083720	predicted gene 12901 [Source:MGI Symbol;Acc:MGI:3650176]	Gm12901	0.650922	2.14579	1.37896	3.07968	4.06969	3.36655		1.43941	0.0301236	0.00329563
	ENSMUSG00000035547	calpain 5 [Source:MGI Symbol;Acc:MGI:1100859]	Capn5	6.1661	5.72341	5.87005	3.3317	5.06566	4.12242		-0.386983	0.0301735	0.00330495
	ENSMUSG00000024220	zinc finger protein 523 [Source:MGI Symbol;Acc:MGI:2687278]	Zfp523	4.53263	4.45646	5.2164	4.80458	3.91071	3.54972		-0.341958	0.0301767	0.00330915
	ENSMUSG00000040009	guanine nucleotide binding protein, alpha z subunit [Source:MGI Symbol;Acc:MGI:95780]	Gnaz	0.287617	0.221233	0.270804	0.628057	0.632712	0.402877		0.97648	0.0302017	0.00331574
	ENSMUSG00000063410	serine/threonine kinase 24 [Source:MGI Symbol;Acc:MGI:2385007]	Stk24	124.918	123.667	125.61	151.245	133.584	131.783		0.121845	0.0302173	0.00332131
	ENSMUSG00000001029	intercellular adhesion molecule 2 [Source:MGI Symbol;Acc:MGI:96394]	Icam2	13.2769	15.8883	15.84	20.8506	18.3203	19.401		0.330828	0.030251	0.00332888
	ENSMUSG00000033952	abnormal spindle microtubule assembly [Source:MGI Symbol;Acc:MGI:1334448]	Aspm	31.1632	29.6668	33.3362	48.2155	35.4827	35.3585		0.208808	0.0302699	0.00333815
	ENSMUSG00000042659	arrestin domain containing 4 [Source:MGI Symbol;Acc:MGI:1913662]	Arrdc4	4.65836	5.48311	4.8435	7.6136	6.46229	5.70914		0.352801	0.0302699	0.00333869
	ENSMUSG00000031198	FUN14 domain containing 2 [Source:MGI Symbol;Acc:MGI:1914641]	Fundc2	75.8482	74.1092	74.2242	99.3307	79.425	84.2047		0.176793	0.0302775	0.00335629
	ENSMUSG00000035545	leukocyte receptor cluster (LRC) member 8 [Source:MGI Symbol;Acc:MGI:2142195]	Leng8	88.68	68.8685	73.227	78.1012	59.6049	52.2844		-0.363378	0.0302775	0.00334674
	ENSMUSG00000071716	apolipoprotein L 7e [Source:MGI Symbol;Acc:MGI:3704456]	Apol7e	47.3388	41.6617	40.5196	29.2887	33.9819	34.2677		-0.305151	0.0302775	0.00335885
	ENSMUSG00000024807	synovial apoptosis inhibitor 1, synoviolin [Source:MGI Symbol;Acc:MGI:1921376]	Syvn1	31.3816	30.5653	32.578	28.7646	28.2696	27.5065		-0.1697	0.0302775	0.00334815
	ENSMUSG00000110027	RIKEN cDNA C030029H02 gene [Source:MGI Symbol;Acc:MGI:1924633]	C030029H02Rik	0.0304404	0	0	0.731187	0.0634398	0.0885585		2.78556	0.0302775	0.00335789
	ENSMUSG00000025227	major facilitator superfamily domain containing 13a [Source:MGI Symbol;Acc:MGI:1922396]	Mfsd13a	17.9485	20.3559	18.6629	13.8435	14.928	15.8885		-0.289559	0.0303137	0.00336674
	ENSMUSG00000003500	inosine monophosphate dehydrogenase 1 [Source:MGI Symbol;Acc:MGI:96567]	Impdh1	179.243	192.27	193.461	157.863	168.921	167.499		-0.166832	0.0303723	0.00337712
	ENSMUSG00000079487	mediator complex subunit 12 [Source:MGI Symbol;Acc:MGI:1926212]	Med12	62.1801	54.1441	59.2084	57.1258	52.1472	51.5519		-0.145281	0.0303749	0.00338129
	ENSMUSG00000004270	lysophosphatidylcholine acyltransferase 3 [Source:MGI Symbol;Acc:MGI:1315211]	Lpcat3	97.6282	100.882	102.813	78.4795	88.5552	83.6452		-0.22781	0.0304269	0.00340091
	ENSMUSG00000037474	denticleless E3 ubiquitin protein ligase [Source:MGI Symbol;Acc:MGI:1924093]	Dtl	26.0431	25.3476	25.5673	34.6493	29.1646	26.1044		0.159284	0.0304269	0.00340461
	ENSMUSG00000024410	regulator of MON1-CCZ1 [Source:MGI Symbol;Acc:MGI:1916528]	Rmc1	28.3067	25.0582	25.3555	20.774	21.8305	22.5433		-0.214057	0.0304269	0.00341039
	ENSMUSG00000028803	NIPA-like domain containing 3 [Source:MGI Symbol;Acc:MGI:1921802]	Nipal3	12.7782	13.1036	13.9004	19.9143	15.598	15.9321		0.274626	0.0304269	0.00340702
	ENSMUSG00000028914	caspase 9 [Source:MGI Symbol;Acc:MGI:1277950]	Casp9	12.7046	13.2893	12.5632	10.7187	10.577	10.791		-0.235583	0.0304269	0.00340134
	ENSMUSG00000074570	Cas scaffolding protein family member 4 [Source:MGI Symbol;Acc:MGI:2444482]	Cass4	10.3325	10.7101	8.80757	3.39856	7.32053	6.89655		-0.495624	0.0304269	0.00339344
	ENSMUSG00000107215	predicted gene 43197 [Source:MGI Symbol;Acc:MGI:5663334]	Gm43197	5.89887	4.81727	5.17537	4.44008	3.91161	3.12022		-0.521591	0.0304976	0.0034222
	ENSMUSG00000030047	Rho GTPase activating protein 25 [Source:MGI Symbol;Acc:MGI:2443687]	Arhgap25	24.3669	23.8404	24.0639	34.7904	26.3405	28.1233		0.227348	0.0305203	0.00343199
	ENSMUSG00000075555	predicted gene 10863 [Source:MGI Symbol;Acc:MGI:3641623]	Gm10863	4.27054	4.09918	4.65656	3.08561	3.1412	3.0451		-0.502912	0.0305203	0.00343254
	ENSMUSG00000055612	cell division cycle associated 7 [Source:MGI Symbol;Acc:MGI:1914203]	Cdca7	106.526	100.573	108.929	153.346	115.924	116.622		0.183886	0.0305216	42.4332
	ENSMUSG00000026520	pyrroline-5-carboxylate reductase family, member 2 [Source:MGI Symbol;Acc:MGI:1277956]	Pycr2	25.9503	28.4425	28.0525	39.5814	32.9779	30.8037		0.252253	0.0305216	0.0034382
	ENSMUSG00000004642	stem-loop binding protein [Source:MGI Symbol;Acc:MGI:108402]	Slbp	90.0302	89.6564	95.9738	109.125	101.06	99.8156		0.138541	0.030677	0.00346192
	ENSMUSG00000025314	protein tyrosine phosphatase, receptor type, J [Source:MGI Symbol;Acc:MGI:104574]	Ptprj	23.965	20.9259	22.8081	21.005	18.6932	18.9512		-0.231337	0.0309805	0.00350011
	ENSMUSG00000053044	CD8 antigen, beta chain 1 [Source:MGI Symbol;Acc:MGI:88347]	Cd8b1	715.854	664.306	703.708	891.048	765.084	743.032		0.155337	0.03099	63.3886
	ENSMUSG00000033545	zinc and ring finger 1 [Source:MGI Symbol;Acc:MGI:2177308]	Znrf1	46.5471	39.4292	45.4251	41.591	37.7231	38.2484		-0.188225	0.03099	0.00352098
	ENSMUSG00000027333	spermine oxidase [Source:MGI Symbol;Acc:MGI:2445356]	Smox	7.14398	7.03581	6.25888	4.43403	5.40558	4.80063		-0.365645	0.03099	0.00351047
	ENSMUSG00000027009	integrin alpha 4 [Source:MGI Symbol;Acc:MGI:96603]	Itga4	3.72435	2.61339	2.96238	7.31223	4.25952	3.81188		0.520264	0.03099	0.00350542
	ENSMUSG00000092116	predicted pseudogene 10320 [Source:MGI Symbol;Acc:MGI:3642323]	Gm10320	0.87613	2.59938	1.23737	1.91317	3.88006	3.18609		1.26446	0.03099	0.00352013
	ENSMUSG00000055413	histocompatibility 2, Q region locus 5 [Source:MGI Symbol;Acc:MGI:95934]	H2-Q5	80.5327	70.4596	75.8764	67.1738	68.7217	54.3156		-0.269694	0.0310119	0.00352742
	ENSMUSG00000024590	lamin B1 [Source:MGI Symbol;Acc:MGI:96795]	Lmnb1	468.346	465.219	519.894	704.611	543.177	553.303		0.200552	0.0310246	0.00353282
	ENSMUSG00000041220	ELOVL family member 6, elongation of long chain fatty acids (yeast) [Source:MGI Symbol;Acc:MGI:2156528]	Elovl6	51.8009	46.4363	51.5486	71.5692	58.9907	52.3398		0.198144	0.0310595	0.00354869
	ENSMUSG00000020056	WASH complex subunit 3 [Source:MGI Symbol;Acc:MGI:1914532]	Washc3	21.7068	21.5427	20.1085	23.0333	24.2102	22.3827		0.18582	0.0310595	0.00354569
	ENSMUSG00000106391	predicted gene 42690 [Source:MGI Symbol;Acc:MGI:5662827]	Gm42690	0.691575	0.559588	0.621551	0.617794	0.262052	0.182905		-1.208	0.0310595	0.00354857
	ENSMUSG00000053329	glutamine amidotransferase like class 1 domain containing 3A [Source:MGI Symbol;Acc:MGI:1351861]	Gatd3a	31.5183	30.0862	32.0952	38.2529	36.175	35.083		0.204558	0.0310744	0.00355436
	ENSMUSG00000027351	sprouty protein with EVH-1 domain 1, related sequence [Source:MGI Symbol;Acc:MGI:2150016]	Spred1	35.6976	37.6762	35.7456	26.5287	31.7371	30.7895		-0.21503	0.031192	0.0035718
	ENSMUSG00000004677	myosin IXb [Source:MGI Symbol;Acc:MGI:106624]	Myo9b	102.249	93.7645	100.52	101.534	88.5266	87.0894		-0.138562	0.0313192	0.00359836
	ENSMUSG00000020522	microfibrillar-associated protein 3 [Source:MGI Symbol;Acc:MGI:1924068]	Mfap3	43.5574	41.0497	43.7419	41.0396	36.5138	39.4224		-0.156416	0.0313192	0.00359781
	ENSMUSG00000080877	ribosomal protein L22, pseudogene 1 [Source:MGI Symbol;Acc:MGI:3644276]	Rpl22-ps1	14.354	11.2382	9.92504	17.9576	17.4502	15.0797		0.601145	0.0313192	0.00359072
	ENSMUSG00000027109	trans-acting transcription factor 3 [Source:MGI Symbol;Acc:MGI:1277166]	Sp3	102.818	90.1122	95.7225	119.924	102.482	104.994		0.15058	0.0313482	0.00360569
	ENSMUSG00000001017	chromatin target of PRMT1 [Source:MGI Symbol;Acc:MGI:1913761]	Chtop	160.149	160.39	161.747	187.33	175.842	166.845		0.11983	0.0313793	0.00361624
	ENSMUSG00000030123	plexin D1 [Source:MGI Symbol;Acc:MGI:2154244]	Plxnd1	6.84581	7.30186	7.32391	4.93694	5.81558	5.79545		-0.318455	0.0313793	0.00361728
	ENSMUSG00000026483	niban apoptosis regulator 1 [Source:MGI Symbol;Acc:MGI:2137237]	Niban1	33.2526	34.8655	35.1562	18.58	30.0216	27.6963		-0.307415	0.0315425	0.00364012
	ENSMUSG00000026727	Ras suppressor protein 1 [Source:MGI Symbol;Acc:MGI:103040]	Rsu1	11.9415	12.0552	12.2281	15.8164	14.4095	12.784		0.204124	0.0317409	0.00366706
	ENSMUSG00000018820	zinc finger, FYVE domain containing 27 [Source:MGI Symbol;Acc:MGI:1919602]	Zfyve27	14.1359	14.0461	14.1037	13.1248	12.5262	11.1899		-0.216733	0.0317953	0.00367741
	ENSMUSG00000037940	inositol polyphosphate-4-phosphatase, type II [Source:MGI Symbol;Acc:MGI:2158925]	Inpp4b	73.9085	66.4789	74.1194	107.52	80.3475	78.2435		0.196537	0.03189	0.00369244
	ENSMUSG00000021313	ryanodine receptor 2, cardiac [Source:MGI Symbol;Acc:MGI:99685]	Ryr2	0.0601408	0.0713723	0.065119	0.00437756	0.0334233	0.0311047		-1.17743	0.0319112	0.00369896
	ENSMUSG00000055805	formin-like 1 [Source:MGI Symbol;Acc:MGI:1888994]	Fmnl1	427.819	424.055	443.828	412.37	397.378	386.605		-0.126625	0.0319826	0.00372601
	ENSMUSG00000090213	transmembrane protein 189 [Source:MGI Symbol;Acc:MGI:2142624]	Tmem189	88.7734	89.5417	87.2291	72.4914	81.0107	76.6595		-0.153504	0.0319826	0.00372241
	ENSMUSG00000041130	zinc finger protein 598 [Source:MGI Symbol;Acc:MGI:2670965]	Zfp598	61.8196	56.36	60.5428	64.5843	50.5524	50.6667		-0.189765	0.0319826	0.00371769
	ENSMUSG00000026158	opioid growth factor receptor-like 1 [Source:MGI Symbol;Acc:MGI:1917405]	Ogfrl1	7.70104	6.65875	8.70507	11.6254	9.53771	9.41444		0.286521	0.0319826	0.00371877
	ENSMUSG00000026841	fibrinogen C domain containing 1 [Source:MGI Symbol;Acc:MGI:2138953]	Fibcd1	0.170072	0.360417	0.171568	0.026527	0.0506344	0.0471218		-1.82921	0.0319826	0.00372766
	ENSMUSG00000074749	kizuna centrosomal protein [Source:MGI Symbol;Acc:MGI:2684960]	Kiz	5.67523	4.20944	6.19033	7.96678	8.55385	6.92856		0.481085	0.0320039	0.00373423
	ENSMUSG00000028071	SH2 domain containing 2A [Source:MGI Symbol;Acc:MGI:1351596]	Sh2d2a	247.828	242.478	241.366	209.746	212.21	212.511		-0.179774	0.0320255	0.00374482
	ENSMUSG00000021932	ribonuclease H2, subunit B [Source:MGI Symbol;Acc:MGI:1914403]	Rnaseh2b	39.8634	39.8074	40.0444	53.3553	43.4657	43.9647		0.174743	0.0320255	0.00374491
	ENSMUSG00000032113	checkpoint kinase 1 [Source:MGI Symbol;Acc:MGI:1202065]	Chek1	27.6684	28.2004	29.4569	43.3152	31.9195	31.4199		0.198771	0.0320695	0.00375521
	ENSMUSG00000053286	tRNA methyltransferase 1 like [Source:MGI Symbol;Acc:MGI:1916185]	Trmt1l	11.7665	10.0239	10.8802	10.9131	9.1409	8.9703		-0.217403	0.0320695	0.00375825
	ENSMUSG00000039835	NHS-like 1 [Source:MGI Symbol;Acc:MGI:106390]	Nhsl1	1.7699	1.82078	1.767	0.322072	1.19773	1.19356		-0.731445	0.0323937	0.00380037
	ENSMUSG00000090709	predicted gene 17173 [Source:MGI Symbol;Acc:MGI:4938000]	Gm17173	5.89573	5.24392	5.10596	2.91492	3.43883	4.3869		-0.466232	0.0324048	0.00380582
	ENSMUSG00000053334	FIC domain containing [Source:MGI Symbol;Acc:MGI:1098550]	Ficd	8.25291	8.0525	7.46695	7.28102	5.98914	6.00242		-0.320291	0.0325889	0.0038316
	ENSMUSG00000021127	zinc finger protein 36, C3H type-like 1 [Source:MGI Symbol;Acc:MGI:107946]	Zfp36l1	35.4398	33.445	37.8663	67.2301	45.2164	40.4324		0.317433	0.032627	0.00384332
	ENSMUSG00000028228	copine III [Source:MGI Symbol;Acc:MGI:1917818]	Cpne3	27.3886	25.5174	26.5306	34.9583	29.9904	28.2239		0.180895	0.032627	0.00384441
	ENSMUSG00000035722	ATP-binding cassette, sub-family A (ABC1), member 7 [Source:MGI Symbol;Acc:MGI:1351646]	Abca7	28.6866	25.631	27.561	26.1131	24.1027	21.4857		-0.224913	0.0327374	0.00387275
	ENSMUSG00000100228	predicted gene 29257 [Source:MGI Symbol;Acc:MGI:5579963]	Gm29257	3.61284	5.71673	2.6788	5.9169	7.52939	5.2553		0.922632	0.0327374	0.00387414
	ENSMUSG00000027078	ubiquitin-conjugating enzyme E2L 6 [Source:MGI Symbol;Acc:MGI:1914500]	Ube2l6	3.29635	3.71751	3.63455	5.74586	5.60432	4.31825		0.501746	0.0327374	0.00386741
	ENSMUSG00000059336	solute carrier family 14 (urea transporter), member 1 [Source:MGI Symbol;Acc:MGI:1351654]	Slc14a1	1.06907	1.28586	1.77511	5.14215	2.49897	2.07344		0.728429	0.0327374	0.00387071
	ENSMUSG00000008398	ELK3, member of ETS oncogene family [Source:MGI Symbol;Acc:MGI:101762]	Elk3	64.6663	66.0349	67.8072	50.3566	60.4053	57.1499		-0.185558	0.0331806	0.00393359
	ENSMUSG00000041957	plakophilin 2 [Source:MGI Symbol;Acc:MGI:1914701]	Pkp2	2.08894	2.10848	1.80969	0.681879	1.54841	1.12773		-0.599299	0.0331806	0.00393505
	ENSMUSG00000031842	phosphodiesterase 4C, cAMP specific [Source:MGI Symbol;Acc:MGI:99556]	Pde4c	2.86719	2.42755	2.60734	1.39633	2.27839	1.46023		-0.525726	0.0332335	0.00394558
	ENSMUSG00000112160	cDNA sequence BC024063 [Source:MGI Symbol;Acc:MGI:2670978]	BC024063	1.14329	1.34006	1.16617	1.71061	1.98558	1.76571		0.651044	0.0332344	0.00394993
	ENSMUSG00000027201	myelin basic protein expression factor 2, repressor [Source:MGI Symbol;Acc:MGI:104592]	Myef2	35.3913	33.7891	35.3045	34.4162	30.8	30.7188		-0.151784	0.0333685	0.00397012
	ENSMUSG00000028959	Fas-activated serine/threonine kinase [Source:MGI Symbol;Acc:MGI:1913837]	Fastk	46.6262	39.3488	40.9984	40.9338	34.5824	35.6655		-0.210527	0.0334728	0.0039868
	ENSMUSG00000111229	predicted gene, 39323 [Source:MGI Symbol;Acc:MGI:5622208]	Gm39323	54.8117	34.6503	43.0833	34.1849	31.5219	32.5693		-0.4028	0.0335596	0.00400143
	ENSMUSG00000039840	ectopic P-granules autophagy protein 5 homolog (C. elegans) [Source:MGI Symbol;Acc:MGI:1918673]	Epg5	15.2926	12.0194	14.737	12.9809	11.8736	12.0758		-0.216363	0.0335768	0.00400777
	ENSMUSG00000095115	inositol 1,4,5-triphosphate receptor interacting protein-like 2 [Source:MGI Symbol;Acc:MGI:2442416]	Itpripl2	47.0128	41.1893	48.7647	31.9252	38.8792	39.5085		-0.258284	0.033589	0.00401351
	ENSMUSG00000105703	predicted gene 43305 [Source:MGI Symbol;Acc:MGI:5663442]	Gm43305	8.65611	5.23651	9.98173	19.0277	23.1016	10.716		0.952433	0.0336035	0.00402382
	ENSMUSG00000038560	trans-acting transcription factor 6 [Source:MGI Symbol;Acc:MGI:1932575]	Sp6	2.25391	2.08043	1.95238	0.623424	1.31524	1.28229		-0.71999	0.0336035	0.00402107
	ENSMUSG00000013878	ring finger protein 170 [Source:MGI Symbol;Acc:MGI:1924983]	Rnf170	4.95996	4.46594	5.46289	4.86985	4.0499	3.94843		-0.315272	0.0337217	0.00404228
	ENSMUSG00000021327	zinc finger with KRAB and SCAN domains 3 [Source:MGI Symbol;Acc:MGI:1919989]	Zkscan3	13.7665	9.67764	10.9582	11.2058	9.30699	7.94543		-0.318574	0.0339721	0.00407662
	ENSMUSG00000016498	programmed cell death 1 ligand 2 [Source:MGI Symbol;Acc:MGI:1930125]	Pdcd1lg2	30.2555	28.7573	29.055	21.5299	24.2281	25.1161		-0.245327	0.0339741	0.00408121
	ENSMUSG00000021621	zinc finger, CCHC domain containing 9 [Source:MGI Symbol;Acc:MGI:1916335]	Zcchc9	46.3812	43.901	45.5915	39.0759	38.5943	40.7909		-0.178996	0.0339976	0.00410345
	ENSMUSG00000021360	glucosaminyl (N-acetyl) transferase 2, I-branching enzyme [Source:MGI Symbol;Acc:MGI:1100870]	Gcnt2	26.4388	26.406	27.3749	32.0661	30.6036	31.8938		0.233071	0.0339976	0.00410573
	ENSMUSG00000020961	stonin 2 [Source:MGI Symbol;Acc:MGI:1918272]	Ston2	7.78004	9.19814	8.80733	3.38159	7.01516	6.5465		-0.431699	0.0339976	0.00409776
	ENSMUSG00000026707	NOL1/NOP2/Sun domain family member 6 [Source:MGI Symbol;Acc:MGI:1921705]	Nsun6	5.60318	5.10806	5.53617	4.55682	4.34899	4.1591		-0.32937	0.0339976	0.00409584
	ENSMUSG00000082804	ribosomal protein L17, pseudogene 1 [Source:MGI Symbol;Acc:MGI:3652107]	Rpl17-ps1	1.88201	2.06804	1.329	4.79462	3.26853	3.24458		1.09504	0.0339976	0.00409737
	ENSMUSG00000036305	ribosomal protein L39, pseudogene [Source:MGI Symbol;Acc:MGI:3705781]	Rpl39-ps	84.8526	99.792	72.875	111.841	103.554	120.834		0.496239	0.0340193	0.00411269
	ENSMUSG00000017929	UDP-Gal:betaGlcNAc beta 1,4-galactosyltransferase, polypeptide 5 [Source:MGI Symbol;Acc:MGI:1927169]	B4galt5	313.628	288.994	305.367	267.126	256.451	268.386		-0.190372	0.0341008	0.00413561
	ENSMUSG00000033900	microtubule-associated protein 9 [Source:MGI Symbol;Acc:MGI:2442208]	Map9	4.87952	5.30481	4.91198	5.11979	6.9598	5.67157		0.328449	0.0341008	0.00413378
	ENSMUSG00000009418	neuron navigator 1 [Source:MGI Symbol;Acc:MGI:2183683]	Nav1	0.171789	0.145623	0.0996479	1.82875	0.262122	0.273687		1.42516	0.0341008	0.00412759
	ENSMUSG00000030122	parathymosin [Source:MGI Symbol;Acc:MGI:1916452]	Ptms	124.627	131.008	137.347	182.701	168.202	136.828		0.237795	0.0341044	0.00416851
	ENSMUSG00000100150	predicted gene, 19585 [Source:MGI Symbol;Acc:MGI:5011770]	Gm19585	49.9448	42.5306	46.2085	69.3645	51.7385	53.3625		0.244423	0.0341044	0.00414719
	ENSMUSG00000042901	axin interactor, dorsalization associated [Source:MGI Symbol;Acc:MGI:1919737]	Aida	38.4892	37.066	38.6638	47.5138	40.8666	41.7297		0.146829	0.0341044	0.004148
	ENSMUSG00000038119	cell adhesion molecule-related/down-regulated by oncogenes [Source:MGI Symbol;Acc:MGI:1926387]	Cdon	7.51081	7.08759	7.71274	11.19	8.32541	8.83606		0.240343	0.0341044	0.00415912
	ENSMUSG00000046207	phosphoinositide-3-kinase regulatory subunit 5 [Source:MGI Symbol;Acc:MGI:2144613]	Pik3r6	6.24636	4.79064	5.7387	2.26172	4.21751	4.04856		-0.505019	0.0341044	0.00416627
	ENSMUSG00000029524	sirtuin 4 [Source:MGI Symbol;Acc:MGI:1922637]	Sirt4	4.8136	4.61765	4.72484	4.51984	3.16003	3.31426		-0.476156	0.0341044	0.00415541
	ENSMUSG00000046027	StAR-related lipid transfer (START) domain containing 5 [Source:MGI Symbol;Acc:MGI:2156765]	Stard5	4.43962	4.97603	4.82205	3.39312	3.50272	3.87478		-0.36816	0.0341044	0.00415189
	ENSMUSG00000079853	killer cell lectin-like receptor, subfamily A, member 1 [Source:MGI Symbol;Acc:MGI:101907]	Klra1	0.261746	0.453	0.32346	0.428674	1.5683	0.761483		1.55534	0.0341044	0.00417088
	ENSMUSG00000023883	PHD finger protein 10 [Source:MGI Symbol;Acc:MGI:1919307]	Phf10	62.0372	60.2606	58.1565	39.4966	55.6861	47.085		-0.229926	0.034198	0.00419105
	ENSMUSG00000032373	carbonic anhydrase 12 [Source:MGI Symbol;Acc:MGI:1923709]	Car12	25.8909	23.4864	25.7401	20.123	21.6593	21.866		-0.207365	0.034198	0.00418873
	ENSMUSG00000071552	T cell immunoreceptor with Ig and ITIM domains [Source:MGI Symbol;Acc:MGI:3642260]	Tigit	44.7151	43.352	44.1708	81.4601	55.7564	55.6645		0.407951	0.0342339	0.00419983
	ENSMUSG00000024151	mutS homolog 2 [Source:MGI Symbol;Acc:MGI:101816]	Msh2	40.1014	39.576	44.4638	60.7082	49.2637	44.3451		0.199146	0.0343683	0.00422255
	ENSMUSG00000020297	neuron specific gene family member 2 [Source:MGI Symbol;Acc:MGI:1202070]	Nsg2	1.0274	1.23575	1.25494	3.54715	1.96757	1.72337		0.722394	0.0343683	0.00422509
	ENSMUSG00000024516	SEC11 homolog C, signal peptidase complex subunit [Source:MGI Symbol;Acc:MGI:1913536]	Sec11c	64.3445	63.5169	64.4864	55.5917	57.3141	57.6296		-0.147903	0.0343916	0.00423673
	ENSMUSG00000006678	polymerase (DNA directed), alpha 1 [Source:MGI Symbol;Acc:MGI:99660]	Pola1	39.1753	39.1055	43.0359	54.5706	45.7898	44.3408		0.173345	0.0343916	0.00423571
	ENSMUSG00000029468	purinergic receptor P2X, ligand-gated ion channel, 7 [Source:MGI Symbol;Acc:MGI:1339957]	P2rx7	0.754066	0.994324	1.16056	2.42771	2.53861	1.2		0.832324	0.0344196	0.00424458
	ENSMUSG00000097636	myocardial infarction associated transcript 1 [Source:MGI Symbol;Acc:MGI:1922001]	Mirt1	3.31378	2.06491	2.65397	2.2944	1.99324	1.37163		-0.595251	0.034486	0.00425717
	ENSMUSG00000020492	spindle and kinetochore associated complex subunit 2 [Source:MGI Symbol;Acc:MGI:1913390]	Ska2	46.0733	50.3096	47.0338	63.8624	56.5752	49.1952		0.198058	0.034503	0.00426865
	ENSMUSG00000036362	purinergic receptor P2Y, G-protein coupled 13 [Source:MGI Symbol;Acc:MGI:1921441]	P2ry13	6.30117	4.74145	5.38469	2.49268	2.99753	4.56076		-0.588815	0.034503	0.00426547
	ENSMUSG00000061410	zinc finger, CCHC domain containing 14 [Source:MGI Symbol;Acc:MGI:2159407]	Zcchc14	2.49258	2.27432	2.03256	0.388782	1.43782	1.46757		-0.734234	0.034503	0.00427247
	ENSMUSG00000019790	syntaxin binding protein 5 (tomosyn) [Source:MGI Symbol;Acc:MGI:1926058]	Stxbp5	18.5382	18.4372	19.0933	16.3252	17.4381	16.4995		-0.13614	0.0345116	0.00428195
	ENSMUSG00000037463	F-box protein 27 [Source:MGI Symbol;Acc:MGI:2685007]	Fbxo27	0.527767	0.596504	0.452549	0.288116	0.196411	0.182786		-1.21725	0.0345116	0.00428236
	ENSMUSG00000026923	notch 1 [Source:MGI Symbol;Acc:MGI:97363]	Notch1	64.1225	66.583	66.3917	59.3046	61.1298	56.6454		-0.143572	0.0346498	0.00432603
	ENSMUSG00000045932	interferon-induced protein with tetratricopeptide repeats 2 [Source:MGI Symbol;Acc:MGI:99449]	Ifit2	17.607	17.1801	16.9376	26.1881	21.6244	19.2407		0.308213	0.0346498	0.00432151
	ENSMUSG00000036052	DnaJ heat shock protein family (Hsp40) member B5 [Source:MGI Symbol;Acc:MGI:1930018]	Dnajb5	13.4565	12.6925	13.1139	7.32486	11.0029	10.4848		-0.318656	0.0346498	0.00432185
	ENSMUSG00000038239	histidine rich calcium binding protein [Source:MGI Symbol;Acc:MGI:96226]	Hrc	12.8656	14.0582	12.5159	4.02746	11.0626	8.33209		-0.51893	0.0346498	0.00432196
	ENSMUSG00000102929	predicted gene, 37154 [Source:MGI Symbol;Acc:MGI:5610382]	Gm37154	2.14754	1.06192	1.07419	0.879279	0.279725	0.520642		-1.45033	0.0346498	0.00431743
	ENSMUSG00000102275	predicted gene, 37144 [Source:MGI Symbol;Acc:MGI:5610372]	Gm37144	1.00374	1.19119	1.27584	1.75346	0.418372	0.292012		-1.39608	0.0346498	0.00432598
	ENSMUSG00000020115	TANK-binding kinase 1 [Source:MGI Symbol;Acc:MGI:1929658]	Tbk1	87.473	83.8215	87.8078	76.6817	76.5067	79.6449		-0.13911	0.0346814	0.00433454
	ENSMUSG00000039021	tetratricopeptide repeat domain 16 [Source:MGI Symbol;Acc:MGI:2443048]	Ttc16	1.75277	1.87639	1.72262	0.927272	1.20508	0.876158		-0.7578	0.0346814	0.00433884
	ENSMUSG00000040658	2'-deoxynucleoside 5'-phosphate N-hydrolase 1 [Source:MGI Symbol;Acc:MGI:3039376]	Dnph1	18.139	21.2963	19.8643	35.1613	26.9876	22.7639		0.394339	0.0347666	0.00435837
	ENSMUSG00000022833	coiled-coil domain containing 14 [Source:MGI Symbol;Acc:MGI:2443448]	Ccdc14	7.75343	6.66878	7.55286	7.99665	5.89501	6.08611		-0.24578	0.0347666	0.00435668
	ENSMUSG00000028645	solute carrier family 2 (facilitated glucose transporter), member 1 [Source:MGI Symbol;Acc:MGI:95755]	Slc2a1	123.266	137.469	134.009	94.0372	120.625	109.575		-0.211471	0.0348765	0.00437661
	ENSMUSG00000031758	chromodomain protein, Y chromosome-like 2 [Source:MGI Symbol;Acc:MGI:1923046]	Cdyl2	20.7305	20.6911	19.6089	17.6682	17.4112	16.1569		-0.229544	0.0350182	0.0044026
	ENSMUSG00000033767	transmembrane 131 like [Source:MGI Symbol;Acc:MGI:2443399]	Tmem131l	10.9465	8.92726	10.156	18.4219	11.5604	11.5413		0.287175	0.0350182	0.00440333
	ENSMUSG00000024963	DnaJ heat shock protein family (Hsp40) member C4 [Source:MGI Symbol;Acc:MGI:1927346]	Dnajc4	18.897	20.7138	22.4815	15.957	16.8783	16.881		-0.328255	0.0350925	0.00441716
	ENSMUSG00000029121	collapsin response mediator protein 1 [Source:MGI Symbol;Acc:MGI:107793]	Crmp1	21.4445	20.3329	21.5638	31.2124	24.309	22.6863		0.202711	0.0352042	0.00443571
	ENSMUSG00000030400	excision repair cross-complementing rodent repair deficiency, complementation group 2 [Source:MGI Symbol;Acc:MGI:95413]	Ercc2	38.0892	34.2194	38.2149	37.4161	32.5655	31.0849		-0.186147	0.0352115	0.00444112
	ENSMUSG00000002957	adaptor-related protein complex 2, alpha 2 subunit [Source:MGI Symbol;Acc:MGI:101920]	Ap2a2	86.6083	83.6768	85.7294	79.5838	79.5437	74.7966		-0.12405	0.035287	0.00445514
	ENSMUSG00000027932	solute carrier family 27 (fatty acid transporter), member 3 [Source:MGI Symbol;Acc:MGI:1347358]	Slc27a3	1.03343	0.710976	0.856685	0.588696	0.327744	0.479298		-0.99558	0.0354235	0.0044769
	ENSMUSG00000024513	methyl-CpG binding domain protein 2 [Source:MGI Symbol;Acc:MGI:1333813]	Mbd2	255.534	255.484	257.546	298.449	274.994	269.013		0.114581	0.0354409	0.00448363
	ENSMUSG00000025161	solute carrier family 16 (monocarboxylic acid transporters), member 3 [Source:MGI Symbol;Acc:MGI:1933438]	Slc16a3	57.1724	70.623	66.1231	30.8558	55.3912	49.4438		-0.367243	0.0354964	0.00449518
	ENSMUSG00000029554	MAD1 mitotic arrest deficient 1-like 1 [Source:MGI Symbol;Acc:MGI:1341857]	Mad1l1	27.7425	26.6228	30.8267	40.168	31.8752	33.8974		0.214036	0.0355259	0.00450345
	ENSMUSG00000063659	zinc finger and BTB domain containing 18 [Source:MGI Symbol;Acc:MGI:1353609]	Zbtb18	9.40291	6.21181	8.07418	17.1654	9.465	10.1397		0.40944	0.0355789	0.00451471
	ENSMUSG00000050621	ribosomal protein S27, retrogene [Source:MGI Symbol;Acc:MGI:3704345]	Rps27rt	36.1105	38.459	30.0766	48.8619	52.4223	43.6977		0.570052	0.0356382	0.00452679
	ENSMUSG00000038646	RNA guanine-7 methyltransferase activating subunit [Source:MGI Symbol;Acc:MGI:1914398]	Ramac	45.814	43.538	46.2572	58.2011	50.6414	50.8575		0.192334	0.0357131	0.00454086
	ENSMUSG00000032745	GC-rich promoter binding protein 1 [Source:MGI Symbol;Acc:MGI:1920524]	Gpbp1	93.4674	85.9167	91.7193	101.566	101.092	93.5062		0.125966	0.0357904	0.00455557
	ENSMUSG00000030598	F-box protein 17 [Source:MGI Symbol;Acc:MGI:1354707]	Fbxo17	9.52287	9.09774	9.89112	15.3941	12.428	10.8486		0.32732	0.0357904	0.00455982
	ENSMUSG00000035310	NA	NA	33.439	33.1288	33.6412	39.563	36.2499	35.9856		0.139802	0.0357963	0.00456847
	ENSMUSG00000026199	ankyrin repeat and zinc finger domain containing 1 [Source:MGI Symbol;Acc:MGI:1098746]	Ankzf1	9.6753	9.6129	9.40035	9.53436	7.57903	7.0315		-0.321986	0.0357963	0.00457595
	ENSMUSG00000079057	cytochrome P450, family 4, subfamily v, polypeptide 3 [Source:MGI Symbol;Acc:MGI:2142763]	Cyp4v3	1.60656	1.13916	1.60541	2.64769	2.30583	2.26345		0.647532	0.0357963	0.00457885
	ENSMUSG00000019732	calreticulin 3 [Source:MGI Symbol;Acc:MGI:1920566]	Calr3	1.17666	1.10549	1.74491	0.835061	0.735669	0.627583		-1.02478	0.0357963	0.00457584
	ENSMUSG00000026222	nuclear antigen Sp100 [Source:MGI Symbol;Acc:MGI:109561]	Sp100	76.765	73.6515	76.6144	93.7886	80.4533	82.2942		0.13604	0.0358131	0.00458558
	ENSMUSG00000037580	GTP cyclohydrolase 1 [Source:MGI Symbol;Acc:MGI:95675]	Gch1	3.12073	2.95845	3.23388	3.54844	4.27173	3.7247		0.344371	0.0358599	0.00459614
	ENSMUSG00000021910	nischarin [Source:MGI Symbol;Acc:MGI:1928323]	Nisch	28.8532	25.3171	26.8351	28.342	23.2671	20.0756		-0.256002	0.0359172	0.00460808
	ENSMUSG00000025137	phosphate cytidylyltransferase 2, ethanolamine [Source:MGI Symbol;Acc:MGI:1915921]	Pcyt2	82.0972	88.4144	85.0568	74.4116	77.7432	70.4957		-0.181609	0.0359534	0.00461731
	ENSMUSG00000031527	exoribonuclease 1 [Source:MGI Symbol;Acc:MGI:1914526]	Eri1	58.2878	55.765	62.0899	67.3212	64.8068	64.1737		0.135336	0.0361019	0.00464099
	ENSMUSG00000053600	zinc finger protein 472 [Source:MGI Symbol;Acc:MGI:2385049]	Zfp472	25.4141	27.8854	27.1161	30.6847	32.2814	30.5367		0.237819	0.0363018	0.00467698
	ENSMUSG00000044345	MARVEL (membrane-associating) domain containing 1 [Source:MGI Symbol;Acc:MGI:2147570]	Marveld1	11.9882	11.0071	10.9844	10.3366	9.19441	9.33683		-0.237071	0.0363018	0.00468059
	ENSMUSG00000022656	nectin cell adhesion molecule 3 [Source:MGI Symbol;Acc:MGI:1930171]	Nectin3	0.0633883	0.107466	0.16626	0.563561	0.311391	0.193193		1.0927	0.0363018	0.00467537
	ENSMUSG00000032262	elongation of very long chain fatty acids (FEN1/Elo2, SUR4/Elo3, yeast)-like 4 [Source:MGI Symbol;Acc:MGI:1933331]	Elovl4	0.419607	0.452701	0.269372	0.708034	0.675741	0.628865		0.99238	0.0365545	0.00471784
	ENSMUSG00000077704	small nucleolar RNA, C/D box 89 [Source:MGI Symbol;Acc:MGI:3819562]	Snord89	15.7405	5.18891	14.8204	21.7688	24.0564	26.4581		1.04046	0.0367452	0.00474714
	ENSMUSG00000064370	mitochondrially encoded cytochrome b [Source:MGI Symbol;Acc:MGI:102501]	mt-Cytb	7223.47	5756.3	6286.11	6335.98	5555.05	5020.96		-0.219875	0.0370294	0.00478859
	ENSMUSG00000039942	prostaglandin E receptor 4 (subtype EP4) [Source:MGI Symbol;Acc:MGI:104311]	Ptger4	21.8255	20.5543	23.3084	33.517	24.4255	25.0715		0.205745	0.0370333	0.00479381
	ENSMUSG00000074220	zinc finger protein 382 [Source:MGI Symbol;Acc:MGI:3588204]	Zfp382	24.5126	26.7755	27.2416	23.3633	22.7688	21.92		-0.224915	0.0370928	0.00480625
	ENSMUSG00000036356	chondroitin sulfate N-acetylgalactosaminyltransferase 1 [Source:MGI Symbol;Acc:MGI:2442354]	Csgalnact1	2.83306	2.42074	2.7208	0.940338	2.17277	1.47258		-0.63853	0.037142	0.00481737
	ENSMUSG00000037851	isoleucine-tRNA synthetase [Source:MGI Symbol;Acc:MGI:2145219]	Iars	200.01	195.031	208.125	166.215	184.644	178.375		-0.156401	0.0371476	0.00482485
	ENSMUSG00000028420	transmembrane protein 38B [Source:MGI Symbol;Acc:MGI:1098718]	Tmem38b	5.0332	6.38698	5.84523	4.03879	4.86562	3.7048		-0.426344	0.0371476	0.00482758
	ENSMUSG00000018925	HEAT repeat containing 9 [Source:MGI Symbol;Acc:MGI:3650286]	Heatr9	0.492502	0.426182	0.304311	1.88205	0.641504	0.835803		1.1247	0.0371635	0.00483439
	ENSMUSG00000081926	predicted gene 15536 [Source:MGI Symbol;Acc:MGI:3782984]	Gm15536	123.531	111.152	72.2168	161.407	131.888	135.504		0.651909	0.0372562	0.00485872
	ENSMUSG00000058503	family with sequence similarity 133, member B [Source:MGI Symbol;Acc:MGI:1915402]	Fam133b	29.1618	26.0315	27.8538	36.1497	30.4038	29.8834		0.165484	0.0372562	0.00486071
	ENSMUSG00000114993	predicted gene 6363 [Source:MGI Symbol;Acc:MGI:3645989]	Gm6363	0.967292	1.06291	0.986644	2.46427	2.12789	1.56338		0.914917	0.0372562	0.00485493
	ENSMUSG00000020589	CYFIP related Rac1 interactor A [Source:MGI Symbol;Acc:MGI:1261783]	Cyria	4.64616	4.06017	4.85992	6.81379	5.67224	5.2432		0.28479	0.0373269	0.00487471
	ENSMUSG00000029186	phosphatidylinositol 4-kinase type 2 beta [Source:MGI Symbol;Acc:MGI:1914323]	Pi4k2b	31.467	31.9698	29.9817	25.4071	28.311	25.3647		-0.183198	0.0373376	0.00488086
	ENSMUSG00000033557	FAM20B, glycosaminoglycan xylosylkinase [Source:MGI Symbol;Acc:MGI:2443990]	Fam20b	36.8534	34.4681	37.8654	28.8992	31.4626	33.7856		-0.176988	0.0374538	0.00490084
	ENSMUSG00000021843	kinectin 1 [Source:MGI Symbol;Acc:MGI:109153]	Ktn1	21.2587	20.8031	21.3818	19.4628	19.4322	18.561		-0.137924	0.0375123	0.00491719
	ENSMUSG00000072763	RIKEN cDNA 5430403G16 gene [Source:MGI Symbol;Acc:MGI:1924450]	5430403G16Rik	3.42041	2.63095	3.19607	2.716	1.9441	2.3453		-0.490017	0.0375123	0.00491807
	ENSMUSG00000027575	ADP-ribosylation factor GTPase activating protein 1 [Source:MGI Symbol;Acc:MGI:2183559]	Arfgap1	38.6488	33.9256	36.0858	35.6932	30.3002	32.6407		-0.165642	0.0375687	0.00493027
	ENSMUSG00000064080	fibulin 2 [Source:MGI Symbol;Acc:MGI:95488]	Fbln2	0.0906045	0.19713	0.191944	0.949677	0.302121	0.421744		1.216	0.0376089	0.00494035
	ENSMUSG00000053101	G protein-coupled receptor 141 [Source:MGI Symbol;Acc:MGI:2672983]	Gpr141	37.1757	44.2751	41.1244	10.4638	32.8993	27.9002		-0.560084	0.0376241	0.00494714
	ENSMUSG00000017176	5'-nucleotidase, cytosolic IIIB [Source:MGI Symbol;Acc:MGI:1915356]	Nt5c3b	64.7016	63.7538	68.7609	87.4471	74.2794	73.2179		0.186285	0.0376433	0.00495447
	ENSMUSG00000042997	NHL repeat containing 3 [Source:MGI Symbol;Acc:MGI:2444520]	Nhlrc3	12.2499	11.0294	12.4079	11.1457	10.1321	10.58		-0.192792	0.0376675	0.00496247
	ENSMUSG00000020865	ATP-binding cassette, sub-family C (CFTR/MRP), member 3 [Source:MGI Symbol;Acc:MGI:1923658]	Abcc3	0.891353	1.12193	1.23026	0.398129	0.781052	0.72687		-0.647707	0.0376775	0.00496859
	ENSMUSG00000007872	inhibitor of DNA binding 3 [Source:MGI Symbol;Acc:MGI:96398]	Id3	7.15396	7.26621	9.1024	20.9698	13.5661	10.75		0.64143	0.0376867	0.00497462
	ENSMUSG00000043411	ubiquitin specific peptidase 48 [Source:MGI Symbol;Acc:MGI:2158502]	Usp48	43.0331	38.5745	41.0169	39.8544	37.6393	33.2717		-0.169781	0.0379349	0.00501666
	ENSMUSG00000074579	leucine, glutamate and lysine rich 1 [Source:MGI Symbol;Acc:MGI:3645902]	Lekr1	0.379029	0.281134	0.256502	0.413835	0.493701	0.428822		0.703135	0.0379349	0.00501706
	ENSMUSG00000040331	NSE4 homolog A, SMC5-SMC6 complex component [Source:MGI Symbol;Acc:MGI:1915122]	Nsmce4a	55.4266	53.819	59.4857	68.7868	63.0502	61.9165		0.157789	0.0379564	0.00502475
	ENSMUSG00000060600	enolase 3, beta muscle [Source:MGI Symbol;Acc:MGI:95395]	Eno3	31.662	28.2928	30.2799	52.8326	33.7536	34.7593		0.263493	0.0379593	0.00502999
	ENSMUSG00000038525	armadillo repeat containing 10 [Source:MGI Symbol;Acc:MGI:1914461]	Armc10	55.0216	57.9659	57.635	67.2135	62.983	60.6509		0.143299	0.0380777	0.00505435
	ENSMUSG00000097303	RIKEN cDNA 3110083C13 gene [Source:MGI Symbol;Acc:MGI:1920458]	3110083C13Rik	4.65059	3.41996	3.7893	3.5153	1.86387	2.31277		-0.786416	0.0380777	0.0050554
	ENSMUSG00000021890	ELL associated factor 1 [Source:MGI Symbol;Acc:MGI:1921677]	Eaf1	154.895	170.943	159.55	107.435	147.406	133.49		-0.217687	0.0380937	0.00509156
	ENSMUSG00000034908	SID1 transmembrane family, member 2 [Source:MGI Symbol;Acc:MGI:2446134]	Sidt2	140.979	135.851	133.15	128.038	119.534	116.31		-0.171395	0.0380937	0.00508661
	ENSMUSG00000030750	NSE1 homolog, SMC5-SMC6 complex component [Source:MGI Symbol;Acc:MGI:1914961]	Nsmce1	65.1412	77.4784	81.512	120.53	92.7682	93.0711		0.32459	0.0380937	0.00508999
	ENSMUSG00000022500	LPS-induced TN factor [Source:MGI Symbol;Acc:MGI:1929512]	Litaf	76.7445	80.4583	78.2711	43.827	61.9373	68.4089		-0.310008	0.0380937	0.00506257
	ENSMUSG00000025017	phosphoinositide-3-kinase adaptor protein 1 [Source:MGI Symbol;Acc:MGI:1933177]	Pik3ap1	61.3404	69.1246	62.1873	29.879	54.0103	49.5605		-0.353891	0.0380937	0.00508488
	ENSMUSG00000037944	chemokine (C-C motif) receptor 7 [Source:MGI Symbol;Acc:MGI:103011]	Ccr7	25.8522	21.2383	30.2476	69.8963	33.6279	38.1992		0.504317	0.0380937	0.00507964
	ENSMUSG00000014786	solute carrier family 9 (sodium/hydrogen exchanger), member 5 [Source:MGI Symbol;Acc:MGI:2685542]	Slc9a5	18.8565	13.8556	15.6335	16.0664	13.3366	12.1337		-0.261252	0.0380937	0.00508379
	ENSMUSG00000026172	BCS1-like (yeast) [Source:MGI Symbol;Acc:MGI:1914071]	Bcs1l	17.7463	16.8734	17.6634	18.0536	14.267	14.4008		-0.237972	0.03826	0.00511867
	ENSMUSG00000033287	potassium channel tetramerisation domain containing 17 [Source:MGI Symbol;Acc:MGI:1920094]	Kctd17	28.7553	28.8872	31.373	49.797	36.2124	33.436		0.269858	0.038462	0.00515551
	ENSMUSG00000037606	oxysterol binding protein-like 5 [Source:MGI Symbol;Acc:MGI:1930265]	Osbpl5	22.6398	20.6247	21.9079	21.5136	17.2775	18.2198		-0.251127	0.038462	0.00515129
	ENSMUSG00000027722	spermatogenesis associated 5 [Source:MGI Symbol;Acc:MGI:1927170]	Spata5	77.0623	75.2425	79.7715	91.4342	84.1386	85.9333		0.149425	0.0384924	0.00516734
	ENSMUSG00000027533	fatty acid binding protein 5, epidermal [Source:MGI Symbol;Acc:MGI:101790]	Fabp5	49.9324	49.1892	50.4565	65.1879	58.4718	56.424		0.234601	0.0384924	0.00516942
	ENSMUSG00000017652	CD40 antigen [Source:MGI Symbol;Acc:MGI:88336]	Cd40	0.237232	0.268129	0.454706	0.740047	0.812239	0.887353		1.21758	0.0386528	2.50797
	ENSMUSG00000036246	Gem-interacting protein [Source:MGI Symbol;Acc:MGI:1926066]	Gmip	61.7693	53.2947	59.0492	61.653	50.5435	48.6503		-0.18254	0.0387077	0.00520821
	ENSMUSG00000030769	solute carrier family 5 (sodium/glucose cotransporter), member 11 [Source:MGI Symbol;Acc:MGI:1919316]	Slc5a11	2.67858	2.56623	2.63037	1.87354	2.09338	1.13643		-0.698641	0.0387484	0.00521863
	ENSMUSG00000019891	discoidin, CUB and LCCL domain containing 1 [Source:MGI Symbol;Acc:MGI:1913936]	Dcbld1	0.602355	0.313529	0.380583	0.986502	0.693744	0.584131		0.747445	0.0388881	0.00524242
	ENSMUSG00000021575	aryl-hydrocarbon receptor repressor [Source:MGI Symbol;Acc:MGI:1333776]	Ahrr	5.66086	6.34805	5.2062	5.2329	6.80336	7.80163		0.370161	0.0388919	0.0052479
	ENSMUSG00000031668	eukaryotic translation initiation factor 2 alpha kinase 3 [Source:MGI Symbol;Acc:MGI:1341830]	Eif2ak3	59.2858	55.6383	54.6615	41.0967	49.7615	48.2043		-0.196185	0.0389933	0.00527153
	ENSMUSG00000038481	cyclin-dependent kinase 19 [Source:MGI Symbol;Acc:MGI:1925584]	Cdk19	22.7267	23.7646	24.2891	36.6923	28.0027	26.2133		0.246075	0.0389933	0.53965
	ENSMUSG00000032035	E26 avian leukemia oncogene 1, 5' domain [Source:MGI Symbol;Acc:MGI:95455]	Ets1	105.775	92.6474	112.065	176.808	115.471	128.05		0.268937	0.0390125	0.0052791
	ENSMUSG00000027715	cyclin A2 [Source:MGI Symbol;Acc:MGI:108069]	Ccna2	281.296	272.711	293.587	376.084	306.67	310.482		0.155569	0.0392974	0.00532268
	ENSMUSG00000033213	expressed sequence AA467197 [Source:MGI Symbol;Acc:MGI:3034182]	AA467197	281.331	295.876	281.057	133.259	214.268	226.295		-0.423918	0.0393311	0.00533226
	ENSMUSG00000028822	transmembrane protein 50A [Source:MGI Symbol;Acc:MGI:1919067]	Tmem50a	233.133	230.919	240.364	269.923	255.339	253.138		0.129877	0.0393465	0.00534225
	ENSMUSG00000052160	phospholipase D family, member 4 [Source:MGI Symbol;Acc:MGI:2144765]	Pld4	2.80073	2.539	2.63701	5.09653	3.7523	3.36267		0.494186	0.0393465	0.00534928
	ENSMUSG00000056204	pyroglutamyl-peptidase I [Source:MGI Symbol;Acc:MGI:1913772]	Pgpep1	3.27692	3.30514	3.69325	1.91924	2.4875	2.9042		-0.420937	0.0393465	0.00535445
	ENSMUSG00000032122	solute carrier family 37 (glycerol-3-phosphate transporter), member 2 [Source:MGI Symbol;Acc:MGI:1929693]	Slc37a2	2.13727	2.35426	2.4418	0.891677	1.84687	1.43229		-0.593269	0.0393465	0.00535414
	ENSMUSG00000019961	thymopoietin [Source:MGI Symbol;Acc:MGI:106920]	Tmpo	109.038	104.835	113.055	149.006	115.328	122.543		0.157139	0.0393717	0.00536289
	ENSMUSG00000073555	predicted gene 4951 [Source:MGI Symbol;Acc:MGI:3644953]	Gm4951	20.3803	17.0479	22.0036	33.4492	23.0559	25.477		0.2993	0.0394167	0.00538413
	ENSMUSG00000022265	progressive ankylosis [Source:MGI Symbol;Acc:MGI:3045421]	Ank	19.6327	18.0246	21.2473	27.161	22.6237	23.7829		0.239006	0.0394167	0.00537503
	ENSMUSG00000039307	hexosaminidase (glycosyl hydrolase family 20, catalytic domain) containing [Source:MGI Symbol;Acc:MGI:3605542]	Hexdc	3.56824	2.85209	2.74411	2.82854	1.85911	2.22786		-0.452511	0.0394167	0.00538361
	ENSMUSG00000051166	echinoderm microtubule associated protein like 5 [Source:MGI Symbol;Acc:MGI:2442513]	Eml5	7.33971	6.87916	6.01635	5.16439	5.31876	4.97771		-0.304006	0.0395634	0.00540921
	ENSMUSG00000027452	acyl-CoA synthetase short-chain family member 1 [Source:MGI Symbol;Acc:MGI:1915988]	Acss1	3.99867	3.67799	3.85049	9.46446	5.79848	5.12507		0.601411	0.0396627	0.00542789
	ENSMUSG00000036834	phospholipase C, eta 1 [Source:MGI Symbol;Acc:MGI:2683547]	Plch1	1.60375	1.40101	1.74594	2.62654	2.18644	1.87924		0.362253	0.0396627	0.00543292
	ENSMUSG00000055897	protein phosphatase 4, regulatory subunit 1-like, pseudogene [Source:MGI Symbol;Acc:MGI:1924560]	Ppp4r1l-ps	2.06382	1.86067	2.1488	1.82364	1.48039	1.46148		-0.442158	0.0397199	0.00544582
	ENSMUSG00000025592	dachshund family transcription factor 2 [Source:MGI Symbol;Acc:MGI:1890446]	Dach2	0.0467897	0.0347049	0.0413012	0.229889	0.0975127	0.102092		1.33952	0.0398157	0.00546403
	ENSMUSG00000090272	myeloid nuclear differentiation antigen like [Source:MGI Symbol;Acc:MGI:3780953]	Mndal	46.9307	40.6587	42.2655	59.2071	48.1329	47.1941		0.202872	0.0399944	0.00549367
	ENSMUSG00000020196	calcineurin binding protein 1 [Source:MGI Symbol;Acc:MGI:1298375]	Cabin1	40.1455	36.5551	39.3909	41.4257	34.9234	33.9655		-0.130311	0.0400081	0.00550066
	ENSMUSG00000071172	serine and arginine-rich splicing factor 3 [Source:MGI Symbol;Acc:MGI:98285]	Srsf3	144.277	146.037	149.103	171.343	163.026	155.018		0.139235	0.0400107	0.00551123
	ENSMUSG00000028393	aminolevulinate, delta-, dehydratase [Source:MGI Symbol;Acc:MGI:96853]	Alad	77.8583	77.9141	80.4229	64.5306	65.7661	70.5969		-0.210584	0.0400107	0.00550835
	ENSMUSG00000047539	F-box protein 28 [Source:MGI Symbol;Acc:MGI:1261890]	Fbxo28	46.3848	45.6152	47.5308	39.8376	43.0871	41.4873		-0.137414	0.0400652	0.00552385
	ENSMUSG00000022175	low-density lipoprotein receptor-related protein 10 [Source:MGI Symbol;Acc:MGI:1929480]	Lrp10	165.709	163.548	170.384	144.046	153.27	148.983		-0.138851	0.0400798	0.00554753
	ENSMUSG00000060671	ATPase, class I, type 8B, member 2 [Source:MGI Symbol;Acc:MGI:1859660]	Atp8b2	123.008	122.01	120.216	107.349	111.473	108.591		-0.126173	0.0400798	0.00553617
	ENSMUSG00000001065	zinc finger protein (C2H2 type) 276 [Source:MGI Symbol;Acc:MGI:1888495]	Zfp276	11.6683	10.2389	11.5561	10.6203	9.91837	8.62307		-0.246151	0.0400798	0.00555144
	ENSMUSG00000004032	glutathione S-transferase, mu 5 [Source:MGI Symbol;Acc:MGI:1309466]	Gstm5	3.25155	5.18079	2.93392	0.98615	1.78823	2.01453		-0.880305	0.0400798	0.00553198
	ENSMUSG00000014782	pleckstrin homology domain containing, family G (with RhoGef domain) member 4 [Source:MGI Symbol;Acc:MGI:2142544]	Plekhg4	1.49608	1.58376	1.38383	1.01229	1.05395	0.919534		-0.52121	0.0400798	0.00555113
	ENSMUSG00000084235	predicted gene 15421 [Source:MGI Symbol;Acc:MGI:3705475]	Gm15421	9.91425	9.80481	8.50125	13.6597	14.7585	12.3612		0.603444	0.0400878	0.00555767
	ENSMUSG00000092748	NA	NA	0	0	1.04503	8.07885	1.54208	4.30531		1.76751	0.0401576	0.00557248
	ENSMUSG00000024277	microtubule-associated protein, RP/EB family, member 2 [Source:MGI Symbol;Acc:MGI:106271]	Mapre2	13.3624	13.8527	15.2446	19.5308	16.4235	15.7231		0.192237	0.0403068	0.00559832
	ENSMUSG00000031129	solute carrier family 9 (sodium/hydrogen exchanger), member 9 [Source:MGI Symbol;Acc:MGI:2679732]	Slc9a9	20.8136	20.5437	20.4534	22.7249	24.5266	21.7411		0.187183	0.0403338	0.00560984
	ENSMUSG00000097048	RIKEN cDNA 1600020E01 gene [Source:MGI Symbol;Acc:MGI:1919262]	1600020E01Rik	5.33411	4.80046	4.97208	3.96028	4.50224	2.92259		-0.421909	0.0403338	0.00561237
	ENSMUSG00000025019	ligand dependent nuclear receptor corepressor [Source:MGI Symbol;Acc:MGI:2443930]	Lcor	11.9997	11.894	12.586	10.3174	11.3262	9.88281		-0.200101	0.0403391	0.00563205
	ENSMUSG00000095296	predicted gene 8906 [Source:MGI Symbol;Acc:MGI:3779820]	Gm8906	11.3435	10.0756	10.0128	1.94951	6.5668	7.43537		-0.708804	0.0403391	0.00562891
	ENSMUSG00000020712	testicular cell adhesion molecule 1 [Source:MGI Symbol;Acc:MGI:1923120]	Tcam1	0.738359	0.39553	0.564849	0.940522	1.12203	0.805524		0.797573	0.0403391	0.00562454
	ENSMUSG00000028664	Eph receptor B2 [Source:MGI Symbol;Acc:MGI:99611]	Ephb2	0.704959	0.805829	1.112	0.239905	0.658269	0.568213		-0.740065	0.0403391	0.00563371
	ENSMUSG00000038563	elongation factor like GTPase 1 [Source:MGI Symbol;Acc:MGI:2141969]	Efl1	28.1864	28.2977	28.937	23.2032	25.0693	25.894		-0.164463	0.0403973	0.005647
	ENSMUSG00000026174	CCR4-NOT transcription complex, subunit 9 [Source:MGI Symbol;Acc:MGI:1928902]	Cnot9	127.619	122.928	128.446	144.608	135.781	136.338		0.125693	0.0404389	0.0056725
	ENSMUSG00000022022	mitochondrial translational release factor 1 [Source:MGI Symbol;Acc:MGI:2384815]	Mtrf1	11.2416	10.1241	11.2489	8.20005	7.92575	9.3243		-0.346378	0.0404389	0.00567195
	ENSMUSG00000042814	malignant T cell amplified sequence 2 [Source:MGI Symbol;Acc:MGI:1913655]	Mcts2	4.93616	6.00821	5.18388	4.42211	3.42909	1.96382		-0.903377	0.0404389	0.00567346
	ENSMUSG00000024034	transmembrane protease, serine 3 [Source:MGI Symbol;Acc:MGI:2155445]	Tmprss3	0.785833	0.690808	0.801555	0.254221	0.454924	0.423366		-0.845511	0.0404389	0.00567095
	ENSMUSG00000069682	predicted pseudogene 10275 [Source:MGI Symbol;Acc:MGI:3704354]	Gm10275	61.078	50.5163	53.5284	76.2134	65.5395	63.4609		0.291388	0.0405096	0.00569372
	ENSMUSG00000053819	calcium/calmodulin-dependent protein kinase II, delta [Source:MGI Symbol;Acc:MGI:1341265]	Camk2d	2.97133	2.54774	2.6853	3.86612	3.01066	3.24472		0.252175	0.0405096	0.00569362
	ENSMUSG00000037992	retinoic acid receptor, alpha [Source:MGI Symbol;Acc:MGI:97856]	Rara	106.915	112.43	113.127	99.1783	100.717	99.167		-0.142251	0.0405341	0.00570971
	ENSMUSG00000032580	RNA binding motif protein 5 [Source:MGI Symbol;Acc:MGI:1933204]	Rbm5	27.4627	20.9392	23.354	21.3044	19.4521	19.8288		-0.23563	0.0405341	0.00571063
	ENSMUSG00000022556	heat shock factor 1 [Source:MGI Symbol;Acc:MGI:96238]	Hsf1	20.2438	20.9208	19.646	20.8955	17.6721	16.8088		-0.172043	0.0405341	0.00571787
	ENSMUSG00000029484	annexin A3 [Source:MGI Symbol;Acc:MGI:1201378]	Anxa3	3.07349	3.0709	2.34937	0.207571	1.68388	0.921806		-1.26577	0.0405341	0.00571526
	ENSMUSG00000059005	heterogeneous nuclear ribonucleoprotein A3 [Source:MGI Symbol;Acc:MGI:1917171]	Hnrnpa3	532.335	506.403	546.43	634.401	568.308	570.145		0.126096	0.0405732	0.00572856
	ENSMUSG00000036333	kinase D-interacting substrate 220 [Source:MGI Symbol;Acc:MGI:1924730]	Kidins220	86.5493	81.7093	87.1912	78.8832	78.7958	76.2092		-0.124666	0.0406877	0.00574992
	ENSMUSG00000104818	predicted gene 43661 [Source:MGI Symbol;Acc:MGI:5663798]	Gm43661	1.84823	3.65565	2.84758	1.1007	1.0505	1.62937		-1.03269	0.0406916	0.00575566
	ENSMUSG00000002603	transforming growth factor, beta 1 [Source:MGI Symbol;Acc:MGI:98725]	Tgfb1	214.354	236.033	232.815	194.444	203.683	188.954		-0.207244	0.0407142	0.00577622
	ENSMUSG00000041765	ubiquitin associated domain containing 2 [Source:MGI Symbol;Acc:MGI:1916139]	Ubac2	85.9525	90.1927	85.655	107.542	95.4303	92.557		0.152943	0.0407142	0.00577965
	ENSMUSG00000024404	RIO kinase 3 [Source:MGI Symbol;Acc:MGI:1914128]	Riok3	44.0536	45.5874	45.8157	38.4309	41.385	40.8115		-0.134469	0.0407142	0.00577266
	ENSMUSG00000040065	pore forming protein-like [Source:MGI Symbol;Acc:MGI:1860266]	Pfpl	0.441922	0.582726	0.457699	0.0321669	0.153499	0.342842		-1.22413	0.0407142	0.00577924
	ENSMUSG00000027309	RIKEN cDNA 4930402H24 gene [Source:MGI Symbol;Acc:MGI:1923029]	4930402H24Rik	4.95985	4.16612	3.78539	3.2279	3.08068	3.36055		-0.32169	0.0407604	0.00579586
	ENSMUSG00000052234	eosinophil peroxidase [Source:MGI Symbol;Acc:MGI:107569]	Epx	0.548262	0.667335	0.744538	0.230234	0.307626	0.327184		-1.07676	0.0407604	0.00579662
	ENSMUSG00000033721	vav 3 oncogene [Source:MGI Symbol;Acc:MGI:1888518]	Vav3	25.9502	29.2186	26.2386	14.7962	22.474	21.9402		-0.310056	0.0408196	0.00581025
	ENSMUSG00000041712	ubiquitin protein ligase E3 component n-recognin 7 (putative) [Source:MGI Symbol;Acc:MGI:1913872]	Ubr7	88.5991	87.4111	93.6601	110.687	97.5608	98.585		0.140861	0.0409154	0.00582911
	ENSMUSG00000027968	La ribonucleoprotein domain family, member 7 [Source:MGI Symbol;Acc:MGI:107634]	Larp7	130.798	132.635	134.292	150.639	144.023	141.034		0.123826	0.0409884	0.00584473
	ENSMUSG00000030921	tripartite motif-containing 30A [Source:MGI Symbol;Acc:MGI:98178]	Trim30a	32.6271	31.4616	33.9848	41.5706	36.6902	36.2144		0.17433	0.0409902	0.00585022
	ENSMUSG00000053838	NudC domain containing 3 [Source:MGI Symbol;Acc:MGI:2144158]	Nudcd3	40.461	37.9759	39.9529	49.376	42.6801	41.9423		0.135125	0.0412419	0.00589141
	ENSMUSG00000056515	RAB31, member RAS oncogene family [Source:MGI Symbol;Acc:MGI:1914603]	Rab31	5.02528	4.64049	4.21135	2.04927	3.72234	2.99441		-0.454817	0.0412454	0.00589719
	ENSMUSG00000032336	neuroplastin [Source:MGI Symbol;Acc:MGI:108077]	Nptn	79.7044	76.3631	78.935	94.3795	86.5843	83.6449		0.149388	0.0412718	0.00590623
	ENSMUSG00000037617	sperm associated antigen 1 [Source:MGI Symbol;Acc:MGI:1349387]	Spag1	4.87893	5.13176	4.21903	2.52805	3.813	3.54849		-0.329519	0.0415042	0.00594478
	ENSMUSG00000020092	phosphatase domain containing, paladin 1 [Source:MGI Symbol;Acc:MGI:1351623]	Pald1	1.73082	1.23344	1.13236	0.500229	0.769168	0.78986		-0.713191	0.0415136	0.00595142
	ENSMUSG00000024072	Yip1 domain family, member 4 [Source:MGI Symbol;Acc:MGI:1915114]	Yipf4	41.4687	43.9403	43.1012	51.8918	49.338	44.5663		0.161434	0.041581	0.0059664
	ENSMUSG00000040761	spen family transcription repressor [Source:MGI Symbol;Acc:MGI:1891706]	Spen	38.0398	35.181	38.5951	37.7133	32.843	32.1695		-0.172675	0.0416508	0.00598173
	ENSMUSG00000032556	beaded filament structural protein 2, phakinin [Source:MGI Symbol;Acc:MGI:1333828]	Bfsp2	4.35072	5.10946	5.42453	1.55868	3.4002	3.42802		-0.670366	0.0416936	0.00599321
	ENSMUSG00000038023	ATPase, H+ transporting, lysosomal V0 subunit A2 [Source:MGI Symbol;Acc:MGI:104855]	Atp6v0a2	86.9931	81.009	87.3655	74.52	76.2894	78.2201		-0.138739	0.0417101	0.00600394
	ENSMUSG00000005672	KIT proto-oncogene receptor tyrosine kinase [Source:MGI Symbol;Acc:MGI:96677]	Kit	4.90944	5.0346	5.46097	2.1922	4.3734	3.63035		-0.459354	0.0417101	0.00600623
	ENSMUSG00000030835	nodal modulator 1 [Source:MGI Symbol;Acc:MGI:2385850]	Nomo1	117.744	123.445	122.996	108.217	110.981	107.714		-0.140699	0.0418061	0.00603606
	ENSMUSG00000054967	zinc finger protein 647 [Source:MGI Symbol;Acc:MGI:3052806]	Zfp647	1.08121	0.812651	0.763507	2.45544	1.35199	1.17432		0.711788	0.0418061	0.00603123
	ENSMUSG00000115852	predicted gene, 52969 [Source:MGI Symbol;Acc:MGI:6388851]	Gm52969	0.402031	0.491145	0.283898	0.129103	0.123214	0.183467		-1.12171	0.0418061	0.00603496
	ENSMUSG00000038608	dedicator of cytokinesis 10 [Source:MGI Symbol;Acc:MGI:2146320]	Dock10	91.2029	83.8032	89.5932	87.7111	78.9896	79.1354		-0.131389	0.0418095	0.00604188
	ENSMUSG00000027405	NOP56 ribonucleoprotein [Source:MGI Symbol;Acc:MGI:1914384]	Nop56	255.501	241.708	255.652	242.067	223.867	227.071		-0.135088	0.0418647	0.0060659
	ENSMUSG00000024539	protein tyrosine phosphatase, non-receptor type 2 [Source:MGI Symbol;Acc:MGI:97806]	Ptpn2	95.2253	98.5577	94.7887	111.673	107.349	102.052		0.156188	0.0418647	0.00606122
	ENSMUSG00000039910	Cbp/p300-interacting transactivator, with Glu/Asp-rich carboxy-terminal domain, 2 [Source:MGI Symbol;Acc:MGI:1306784]	Cited2	23.725	23.6489	26.3413	45.6006	35.2964	26.1507		0.350231	0.0418647	0.00607031
	ENSMUSG00000027864	prostaglandin F2 receptor negative regulator [Source:MGI Symbol;Acc:MGI:1277114]	Ptgfrn	0.66187	0.894571	0.778976	2.55336	1.29892	0.994861		0.683987	0.0418647	0.00607124
	ENSMUSG00000036438	calmodulin 2 [Source:MGI Symbol;Acc:MGI:103250]	Calm2	826.738	812.476	824.344	944.237	882.969	875.054		0.123905	0.0419329	0.00609183
	ENSMUSG00000017386	TNF receptor associated factor 4 [Source:MGI Symbol;Acc:MGI:1202880]	Traf4	32.1886	33.3591	31.8917	50.6494	38.328	34.139		0.232414	0.0419329	0.00608956
	ENSMUSG00000060438	ribosomal protein S10, pseudogene 1 [Source:MGI Symbol;Acc:MGI:3644167]	Rps10-ps1	32.6469	28.1354	31.4521	36.1541	42.5239	38.6695		0.393799	0.0420096	0.00611398
	ENSMUSG00000036391	Sec24 related gene family, member A (S. cerevisiae) [Source:MGI Symbol;Acc:MGI:1924621]	Sec24a	36.3589	32.068	33.3968	35.1794	30.4223	28.6891		-0.14652	0.0420096	0.00611139
	ENSMUSG00000062310	glutamine repeat protein 1 [Source:MGI Symbol;Acc:MGI:108038]	Glrp1	10.2041	9.62481	9.03838	3.79958	7.92865	6.12027		-0.485296	0.0420096	0.00611907
	ENSMUSG00000023249	poly (ADP-ribose) polymerase family, member 3 [Source:MGI Symbol;Acc:MGI:1891258]	Parp3	21.4072	17.2823	19.0393	18.126	15.4133	15.3729		-0.269269	0.0420563	0.00613124
	ENSMUSG00000039477	trinucleotide repeat containing 18 [Source:MGI Symbol;Acc:MGI:3648294]	Tnrc18	24.1193	23.1737	26.515	22.8408	21.6617	22.1667		-0.177411	0.0420677	0.00613916
	ENSMUSG00000079659	transmembrane protein 243, mitochondrial [Source:MGI Symbol;Acc:MGI:3606159]	Tmem243	8.99346	9.04437	10.0207	12.9143	10.655	11.1594		0.224994	0.0420677	0.00614364
	ENSMUSG00000040697	DnaJ heat shock protein family (Hsp40) member C16 [Source:MGI Symbol;Acc:MGI:2442146]	Dnajc16	13.7594	12.6256	12.7589	12.2933	11.1598	11.211		-0.177123	0.042085	0.00615154
	ENSMUSG00000042379	endothelial cell-specific molecule 1 [Source:MGI Symbol;Acc:MGI:1918940]	Esm1	54.4399	41.0461	49.3659	74.8848	57.0723	55.4619		0.276311	0.042111	0.00616072
	ENSMUSG00000020288	AHA1, activator of heat shock protein ATPase 2 [Source:MGI Symbol;Acc:MGI:1916133]	Ahsa2	34.0025	32.141	32.0329	27.1415	28.8496	29.1701		-0.153528	0.042274	0.00619536
	ENSMUSG00000095918	predicted gene 5861 [Source:MGI Symbol;Acc:MGI:3644254]	Gm5861	35.7033	31.9762	26.6996	3.67971	18.1081	20.6309		-0.812057	0.042274	0.00619188
	ENSMUSG00000110815	predicted gene, 47345 [Source:MGI Symbol;Acc:MGI:6096241]	Gm47345	3.75162	2.31216	2.38047	2.07774	1.64304	1.31816		-0.727467	0.0422758	0.00620641
	ENSMUSG00000070780	RNA binding motif protein 47 [Source:MGI Symbol;Acc:MGI:2384294]	Rbm47	1.12803	1.06777	1.28589	0.263919	0.587724	0.812617		-0.91355	0.0422758	0.00620497
	ENSMUSG00000031358	MSL complex subunit 3 [Source:MGI Symbol;Acc:MGI:1341851]	Msl3	70.0525	69.1602	72.7007	80.0775	75.9653	79.4888		0.144304	0.0422815	0.00624693
	ENSMUSG00000036249	RNA binding motif protein 43 [Source:MGI Symbol;Acc:MGI:1918934]	Rbm43	43.5329	43.5293	43.2172	52.6042	47.327	48.3803		0.17307	0.0422815	0.00624292
	ENSMUSG00000024165	Jupiter microtubule associated homolog 2 [Source:MGI Symbol;Acc:MGI:1196260]	Jpt2	36.7993	34.7893	37.3709	52.6774	39.9366	41.9536		0.210706	0.0422815	0.00621511
	ENSMUSG00000045466	zinc finger protein 956 [Source:MGI Symbol;Acc:MGI:2141515]	Zfp956	11.9397	9.80788	11.3699	10.7007	7.74052	8.335		-0.412914	0.0422815	0.0062416
	ENSMUSG00000085154	RIKEN cDNA C130046K22 gene [Source:MGI Symbol;Acc:MGI:3026935]	C130046K22Rik	5.32755	3.51249	4.70262	3.06996	2.77574	2.58318		-0.701158	0.0422815	0.00623575
	ENSMUSG00000020953	cochlin [Source:MGI Symbol;Acc:MGI:1278313]	Coch	3.54222	5.48314	4.43177	0.756685	3.37014	2.3896		-0.79359	0.0422815	0.00622954
	ENSMUSG00000094092	predicted gene 15921 [Source:MGI Symbol;Acc:MGI:3801933]	Gm15921	2.62884	3.54522	1.01257	3.65304	5.22965	3.24458		1.32257	0.0422815	0.00625806
	ENSMUSG00000026930	G-protein signalling modulator 1 (AGS3-like, C. elegans) [Source:MGI Symbol;Acc:MGI:1915089]	Gpsm1	1.43671	0.975511	1.77167	3.93332	2.48027	2.03788		0.678261	0.0422815	0.00626122
	ENSMUSG00000026335	peptidylglycine alpha-amidating monooxygenase [Source:MGI Symbol;Acc:MGI:97475]	Pam	2.26162	1.97748	2.44701	1.91822	1.70935	1.83551		-0.351075	0.0422815	0.00625435
	ENSMUSG00000086682	predicted gene 16023 [Source:MGI Symbol;Acc:MGI:3802146]	Gm16023	1.1668	0.989077	1.26535	1.36495	0.477654	0.727395		-0.851734	0.0422815	0.00623024
	ENSMUSG00000002668	DENN/MADD domain containing 1C [Source:MGI Symbol;Acc:MGI:1918035]	Dennd1c	52.9366	46.2746	44.7048	45.8336	39.2229	35.8666		-0.268923	0.0423277	0.00627936
	ENSMUSG00000026767	MINDY lysine 48 deubiquitinase 3 [Source:MGI Symbol;Acc:MGI:1914210]	Mindy3	40.2923	40.4824	41.4424	30.3561	36.1381	36.9214		-0.17444	0.0423277	0.00629509
	ENSMUSG00000032265	terminal nucleotidyltransferase 5A [Source:MGI Symbol;Acc:MGI:2670964]	Tent5a	40.8246	34.9494	37.0041	28.6402	34.5892	31.0317		-0.185066	0.0423277	0.00629121
	ENSMUSG00000020389	cyclin-dependent kinase-like 3 [Source:MGI Symbol;Acc:MGI:2388268]	Cdkl3	4.63013	4.68551	5.21616	3.55047	4.35349	3.65469		-0.314083	0.0423277	11.1345
	ENSMUSG00000029094	actin filament associated protein 1 [Source:MGI Symbol;Acc:MGI:1917542]	Afap1	0.39234	0.424103	0.360815	0.129507	0.266216	0.212356		-0.718008	0.0423277	0.00627673
	ENSMUSG00000031760	metallothionein 3 [Source:MGI Symbol;Acc:MGI:97173]	Mt3	3.2485	4.06935	4.28206	1.65518	2.2567	1.68012		-1.01692	0.0425386	0.00633188
	ENSMUSG00000085054	predicted gene 15834 [Source:MGI Symbol;Acc:MGI:3802168]	Gm15834	0.700183	0.46988	0.512099	0.409543	0.338749	0.194		-0.923841	0.0425397	0.00633747
	ENSMUSG00000041638	GCN1 activator of EIF2AK4 [Source:MGI Symbol;Acc:MGI:2444248]	Gcn1	27.4207	25.8749	29.0725	28.722	25.7038	22.9782		-0.155959	0.0426715	0.00636256
	ENSMUSG00000049323	Smith-Magenis syndrome chromosome region, candidate 8 homolog (human) [Source:MGI Symbol;Acc:MGI:2444720]	Smcr8	36.2237	33.5204	35.2263	33.1847	30.5544	31.9546		-0.140393	0.042791	0.00638691
	ENSMUSG00000028572	hook microtubule tethering protein 1 [Source:MGI Symbol;Acc:MGI:1925213]	Hook1	17.5268	16.8668	16.5121	13.3333	14.6918	14.6819		-0.189	0.042791	0.00639973
	ENSMUSG00000033253	SZT2 subunit of KICSTOR complex [Source:MGI Symbol;Acc:MGI:3033336]	Szt2	15.0725	12.3835	13.5228	14.3468	11.9507	11.0092		-0.190591	0.042791	0.00640222
	ENSMUSG00000024600	solute carrier family 27 (fatty acid transporter), member 6 [Source:MGI Symbol;Acc:MGI:3036230]	Slc27a6	3.94832	3.90473	3.47697	0.456447	2.46856	2.20723		-0.837204	0.042791	0.00639529
	ENSMUSG00000081137	cDNA sequence BC022960 [Source:MGI Symbol;Acc:MGI:2670977]	BC022960	0.89037	1.00633	1.25749	0.763818	0.596439	0.431717		-1.00852	0.042797	0.00640859
	ENSMUSG00000023827	1-acylglycerol-3-phosphate O-acyltransferase 4 (lysophosphatidic acid acyltransferase, delta) [Source:MGI Symbol;Acc:MGI:1915512]	Agpat4	29.8725	26.5843	28.7299	15.5846	22.2217	22.8766		-0.370004	0.042798	0.0064142
	ENSMUSG00000020577	tetraspanin 13 [Source:MGI Symbol;Acc:MGI:1913359]	Tspan13	48.9902	49.5107	52.8477	71.7261	54.8416	58.8195		0.195722	0.0429955	0.00644929
	ENSMUSG00000064345	mitochondrially encoded NADH dehydrogenase 2 [Source:MGI Symbol;Acc:MGI:102500]	mt-Nd2	4329.19	3352.43	3716.73	3766.94	3275.77	3093.07		-0.194507	0.0430171	0.00646399
	ENSMUSG00000041859	minichromosome maintenance complex component 3 [Source:MGI Symbol;Acc:MGI:101845]	Mcm3	367.734	383.025	396.937	456.086	415.89	408.4		0.122922	0.0430171	0.00648905
	ENSMUSG00000024425	Nedd4 family interacting protein 1 [Source:MGI Symbol;Acc:MGI:1929601]	Ndfip1	100.297	95.115	101.958	115.181	107.439	105.396		0.119714	0.0430171	0.00649097
	ENSMUSG00000048832	vacuolar protein sorting 37C [Source:MGI Symbol;Acc:MGI:2147661]	Vps37c	46.8202	46.0504	46.4923	39.3407	42.2564	38.6221		-0.185144	0.0430171	0.00646862
	ENSMUSG00000032783	trophinin associated protein [Source:MGI Symbol;Acc:MGI:1925983]	Troap	33.8092	33.5658	34.8973	41.0672	29.7629	27.4121		-0.196744	0.0430171	0.00648904
	ENSMUSG00000024095	heterogeneous nuclear ribonucleoprotein L-like [Source:MGI Symbol;Acc:MGI:1919942]	Hnrnpll	22.7163	21.5173	23.5035	27.5654	24.9793	25.3363		0.167911	0.0430171	0.00648379
	ENSMUSG00000039617	predicted gene 7488 [Source:MGI Symbol;Acc:MGI:3647006]	Gm7488	5.06273	5.50753	5.72014	6.4489	8.26499	8.01895		0.539025	0.0430171	0.00647051
	ENSMUSG00000035849	keratin 222 [Source:MGI Symbol;Acc:MGI:2442728]	Krt222	0.45583	0.554829	0.39617	1.03366	0.876904	0.68006		0.869001	0.0431973	0.00652368
	ENSMUSG00000004633	chimerin 2 [Source:MGI Symbol;Acc:MGI:1917243]	Chn2	1.92648	2.61231	2.31409	1.9516	1.3452	1.63708		-0.569345	0.0432342	0.00653477
	ENSMUSG00000040433	zinc finger and BTB domain containing 38 [Source:MGI Symbol;Acc:MGI:2442866]	Zbtb38	11.9041	11.7824	11.7756	9.39881	10.7539	10.1606		-0.170663	0.0432364	0.00654062
	ENSMUSG00000027652	Ral GTPase activating protein, beta subunit (non-catalytic) [Source:MGI Symbol;Acc:MGI:2444531]	Ralgapb	24.9038	23.2846	25.3533	23.4657	22.2288	21.6604		-0.146595	0.0434715	0.00658173
	ENSMUSG00000022948	SET domain containing 4 [Source:MGI Symbol;Acc:MGI:2136890]	Setd4	6.58804	6.38798	6.54642	6.25581	5.5009	5.07768		-0.258783	0.0435328	0.00660792
	ENSMUSG00000105677	predicted gene 43328 [Source:MGI Symbol;Acc:MGI:5663465]	Gm43328	7.24457	5.33365	5.6274	4.30646	4.44557	3.35658		-0.551024	0.0435328	0.0065984
	ENSMUSG00000010538	TSSK6 activating co-chaperone [Source:MGI Symbol;Acc:MGI:1924177]	Tsacc	2.5951	2.36114	2.27237	2.38006	1.40617	1.00664		-0.826867	0.0435328	0.00661325
	ENSMUSG00000021720	ring finger protein 180 [Source:MGI Symbol;Acc:MGI:1919066]	Rnf180	0.331042	0.245541	0.306821	0.0903603	0.215598	0.0802566		-1.10331	0.0435328	0.00660653
	ENSMUSG00000055795	predicted gene 5160 [Source:MGI Symbol;Acc:MGI:3648528]	Gm5160	6.88345	7.59295	8.59989	9.82803	12.1385	11.5532		0.552097	0.0436941	0.00664698
	ENSMUSG00000037656	solute carrier family 20, member 2 [Source:MGI Symbol;Acc:MGI:97851]	Slc20a2	7.53936	7.51123	7.72371	6.99491	6.73393	5.92464		-0.239023	0.0436941	0.00664891
	ENSMUSG00000005640	insulin receptor-related receptor [Source:MGI Symbol;Acc:MGI:1346037]	Insrr	2.96959	2.47731	2.12553	1.69834	1.68403	1.52803		-0.512869	0.0436941	0.00665448
	ENSMUSG00000022996	wingless-type MMTV integration site family, member 10B [Source:MGI Symbol;Acc:MGI:108061]	Wnt10b	27.4236	21.012	21.2588	15.1192	19.8053	14.054		-0.406885	0.043732	0.00666584
	ENSMUSG00000031996	amyloid beta (A4) precursor-like protein 2 [Source:MGI Symbol;Acc:MGI:88047]	Aplp2	56.0548	57.7484	58.4667	42.8395	49.6892	51.4629		-0.198771	0.0437768	0.00667826
	ENSMUSG00000076258	NA	NA	4123.08	3580.89	3088.88	3553.16	4617.14	7138.5		0.696401	0.0437785	0.00668411
	ENSMUSG00000005501	ubiquitin specific peptidase 40 [Source:MGI Symbol;Acc:MGI:2443184]	Usp40	3.52971	3.01954	4.08556	2.76032	2.82694	2.93258		-0.359978	0.0438231	0.0066965
	ENSMUSG00000031158	translocase of inner mitochondrial membrane 17b [Source:MGI Symbol;Acc:MGI:1343176]	Timm17b	29.0268	33.8405	30.9854	37.8041	36.0328	34.365		0.204327	0.043865	0.00670878
	ENSMUSG00000039217	interleukin 18 [Source:MGI Symbol;Acc:MGI:107936]	Il18	1.67939	1.10724	0.395306	1.58913	1.98331	1.41144		1.30251	0.043865	0.00671411
	ENSMUSG00000105655	predicted gene 42659 [Source:MGI Symbol;Acc:MGI:5662796]	Gm42659	3.35629	3.124	3.02068	2.443	2.60588	1.14874		-0.743156	0.0440545	0.00674874
	ENSMUSG00000000247	LIM homeobox protein 2 [Source:MGI Symbol;Acc:MGI:96785]	Lhx2	0.13138	0.337817	0.33399	0.688532	0.520227	0.611544		1.03452	0.0441716	0.00677232
	ENSMUSG00000036931	nuclear factor of kappa light polypeptide gene enhancer in B cells inhibitor, delta [Source:MGI Symbol;Acc:MGI:3041243]	Nfkbid	64.2591	51.8227	55.1405	51.5187	49.7842	44.8038		-0.216443	0.0442359	0.00678783
	ENSMUSG00000044477	zinc finger, AN1-type domain 3 [Source:MGI Symbol;Acc:MGI:1096572]	Zfand3	31.4332	30.9303	31.4393	26.1415	28.1534	27.8061		-0.154069	0.0442626	0.00679858
	ENSMUSG00000035842	DEAD/H box helicase 11 [Source:MGI Symbol;Acc:MGI:2443590]	Ddx11	15.4673	14.5214	14.8461	14.035	12.8867	12.3137		-0.207695	0.0442626	0.00680406
	ENSMUSG00000025665	ribosomal protein S6 kinase polypeptide 6 [Source:MGI Symbol;Acc:MGI:1914321]	Rps6ka6	0.138157	0.11386	0.227642	3.79624	0.431892	0.49125		1.6351	0.0442626	0.00680887
	ENSMUSG00000062931	zinc finger protein 938 [Source:MGI Symbol;Acc:MGI:3621440]	Zfp938	7.43136	7.08111	6.32024	10.0682	8.76114	8.20598		0.388075	0.0442678	0.00681885
	ENSMUSG00000035172	pleckstrin homology domain containing, family H (with MyTH4 domain) member 3 [Source:MGI Symbol;Acc:MGI:2384950]	Plekhh3	2.12685	1.88029	2.41214	1.30182	1.54466	1.62501		-0.500223	0.0442678	0.00682098
	ENSMUSG00000028842	argonaute RISC catalytic subunit 3 [Source:MGI Symbol;Acc:MGI:2446634]	Ago3	5.85823	4.85668	5.1649	4.41116	4.64549	4.29621		-0.208269	0.0442946	0.00683076
	ENSMUSG00000032215	ribosomal L24 domain containing 1 [Source:MGI Symbol;Acc:MGI:2681840]	Rsl24d1	107.762	110.098	107.258	126.544	118.249	116.439		0.148222	0.0445232	0.00687169
	ENSMUSG00000032218	cyclin B2 [Source:MGI Symbol;Acc:MGI:88311]	Ccnb2	304.22	313.09	326.9	427.811	346.154	349.048		0.172116	0.0445967	0.00689971
	ENSMUSG00000033644	piwi-like RNA-mediated gene silencing 2 [Source:MGI Symbol;Acc:MGI:1930036]	Piwil2	18.4706	23.0169	21.7848	7.03213	16.2211	17.0649		-0.459789	0.0445967	0.0069033
	ENSMUSG00000019872	sphingomyelin phosphodiesterase, acid-like 3A [Source:MGI Symbol;Acc:MGI:1931437]	Smpdl3a	5.42214	5.41757	5.60518	11.9011	8.44595	6.83011		0.542136	0.0445967	0.0069058
	ENSMUSG00000037355	UV stimulated scaffold protein A [Source:MGI Symbol;Acc:MGI:1918351]	Uvssa	6.75318	5.62481	6.20793	6.03536	4.83015	5.06343		-0.276497	0.0445967	0.00690282
	ENSMUSG00000053192	myeloid/lymphoid or mixed-lineage leukemia; translocated to, 11 [Source:MGI Symbol;Acc:MGI:1929671]	Mllt11	21.1017	21.6825	21.1897	16.7512	18.3575	17.7411		-0.228027	0.0447679	0.00693803
	ENSMUSG00000031402	membrane protein, palmitoylated [Source:MGI Symbol;Acc:MGI:105941]	Mpp1	23.4619	23.5875	23.9822	29.5792	25.191	26.167		0.146752	0.0447896	0.00695283
	ENSMUSG00000030114	killer cell lectin-like receptor subfamily G, member 1 [Source:MGI Symbol;Acc:MGI:1355294]	Klrg1	1.06124	1.04952	2.01762	0	0.595455	0.712476		-1.56127	0.0447896	0.00694851
	ENSMUSG00000012483	replication protein A3 [Source:MGI Symbol;Acc:MGI:1915490]	Rpa3	106.692	102.7	99.2351	119.595	114.035	111.544		0.178999	0.0448628	0.00696992
	ENSMUSG00000030978	ribonucleotide reductase M1 [Source:MGI Symbol;Acc:MGI:98180]	Rrm1	154.151	160.753	166.673	199.231	174.743	175.083		0.142509	0.0449933	0.00700743
	ENSMUSG00000037395	REST corepressor 3 [Source:MGI Symbol;Acc:MGI:2441920]	Rcor3	4.76228	4.07281	4.43403	4.84802	3.52316	3.59924		-0.24973	0.0449933	0.00700033
	ENSMUSG00000104344	predicted gene, 38077 [Source:MGI Symbol;Acc:MGI:5611305]	Gm38077	4.80218	4.08077	4.27027	4.15569	3.48428	2.58716		-0.454099	0.0449933	0.00700336
	ENSMUSG00000026509	calpain 2 [Source:MGI Symbol;Acc:MGI:88264]	Capn2	308.214	307.924	315.899	208.64	267.407	269.022		-0.237637	0.0450328	0.00704256
	ENSMUSG00000046791	ribosomal oxygenase 1 [Source:MGI Symbol;Acc:MGI:1919202]	Riox1	43.3848	40.3734	42.147	48.1215	46.3373	46.3224		0.164847	0.0450328	0.00704808
	ENSMUSG00000010362	RAD52 motif 1 [Source:MGI Symbol;Acc:MGI:1913849]	Rdm1	13.4119	16.2355	14.4393	34.0881	17.1831	18.6919		0.402807	0.0450328	0.00702459
	ENSMUSG00000085334	predicted gene 12940 [Source:MGI Symbol;Acc:MGI:3702626]	Gm12940	12.3614	12.2675	11.8922	12.65	9.96365	8.81303		-0.300202	0.0450328	0.0070311
	ENSMUSG00000091264	small integral membrane protein 13 [Source:MGI Symbol;Acc:MGI:2652854]	Smim13	8.54847	7.6138	7.83664	8.85556	10.0615	8.96402		0.27277	0.0450328	0.00702557
	ENSMUSG00000036819	jumonji domain containing 4 [Source:MGI Symbol;Acc:MGI:2144404]	Jmjd4	7.96573	7.94199	7.60702	6.96132	6.50858	6.63919		-0.210529	0.0450328	0.00704655
	ENSMUSG00000030103	basic helix-loop-helix family, member e40 [Source:MGI Symbol;Acc:MGI:1097714]	Bhlhe40	333.705	352.27	324.246	241.962	292.588	276.264		-0.231934	0.0450637	0.00707592
	ENSMUSG00000028771	protein tyrosine phosphatase, non-receptor type 12 [Source:MGI Symbol;Acc:MGI:104673]	Ptpn12	58.2579	53.6458	54.9608	49.744	50.9716	48.8074		-0.13131	0.0450637	0.00706519
	ENSMUSG00000026856	dolichyl pyrophosphate phosphatase 1 [Source:MGI Symbol;Acc:MGI:1914093]	Dolpp1	37.0605	37.3223	38.4238	34.2655	31.1029	34.5197		-0.188019	0.0450637	0.0070712
	ENSMUSG00000038151	PR domain containing 1, with ZNF domain [Source:MGI Symbol;Acc:MGI:99655]	Prdm1	16.9038	14.4051	16.0423	13.1474	13.4533	13.0618		-0.238928	0.0450637	0.00706023
	ENSMUSG00000024222	FK506 binding protein 5 [Source:MGI Symbol;Acc:MGI:104670]	Fkbp5	106.701	103.546	108.795	86.1365	95.725	94.5585		-0.166559	0.0450684	0.00708241
	ENSMUSG00000002058	unc-119 lipid binding chaperone [Source:MGI Symbol;Acc:MGI:1328357]	Unc119	73.9357	78.9486	80.946	61.2646	70.2136	65.2971		-0.216177	0.0451707	0.00711002
	ENSMUSG00000100658	RIKEN cDNA F730311O21 gene [Source:MGI Symbol;Acc:MGI:3643355]	F730311O21Rik	0.339064	0.482025	0.389079	0.393338	0.242905	0.123302		-0.993717	0.0451707	0.00710889
	ENSMUSG00000111913	predicted gene, 49751 [Source:MGI Symbol;Acc:MGI:6215248]	Gm49751	1.48422	1.30009	1.61706	0.370404	1.10472	0.740222		-0.822999	0.0451747	0.00711641
	ENSMUSG00000062867	inosine monophosphate dehydrogenase 2 [Source:MGI Symbol;Acc:MGI:109367]	Impdh2	197.21	195.553	208.138	245.179	217.344	212.235		0.120413	0.0452468	0.00713355
	ENSMUSG00000025188	HPS1, biogenesis of lysosomal organelles complex 3 subunit 1 [Source:MGI Symbol;Acc:MGI:2177763]	Hps1	21.1343	20.8425	22.8178	22.7521	19.3108	18.1433		-0.187435	0.0453165	0.00715033
	ENSMUSG00000041779	translocating chain-associating membrane protein 2 [Source:MGI Symbol;Acc:MGI:1924817]	Tram2	6.2212	6.18681	6.35111	5.80862	4.87556	5.56245		-0.241255	0.0455116	0.00718693
	ENSMUSG00000028494	perilipin 2 [Source:MGI Symbol;Acc:MGI:87920]	Plin2	25.768	27.6289	26.2036	12.4164	21.1658	22.2792		-0.342829	0.0455434	0.00719775
	ENSMUSG00000038886	mannosidase 2, alpha 2 [Source:MGI Symbol;Acc:MGI:2150656]	Man2a2	35.3775	31.7229	34.471	30.4172	29.403	28.6436		-0.203613	0.0456384	0.00721859
	ENSMUSG00000033906	zinc finger, DHHC domain containing 15 [Source:MGI Symbol;Acc:MGI:1915336]	Zdhhc15	30.9057	26.4409	29.326	23.8151	22.8162	26.9431		-0.21632	0.0456587	0.00722763
	ENSMUSG00000022021	diaphanous related formin 3 [Source:MGI Symbol;Acc:MGI:1927222]	Diaph3	39.8793	40.5255	45.2861	54.7209	46.6743	48.0797		0.177707	0.0458042	0.00725651
	ENSMUSG00000026456	cytochrome b5 reductase 1 [Source:MGI Symbol;Acc:MGI:1919267]	Cyb5r1	25.6511	23.0525	24.4885	20.3943	21.66	21.7216		-0.160031	0.0461768	0.00732144
	ENSMUSG00000040007	bromo adjacent homology domain containing 1 [Source:MGI Symbol;Acc:MGI:2139371]	Bahd1	37.4455	40.4343	40.3191	34.5069	35.4605	35.0886		-0.156408	0.0462831	0.0073442
	ENSMUSG00000055148	Kruppel-like factor 2 (lung) [Source:MGI Symbol;Acc:MGI:1342772]	Klf2	9.24941	8.0348	8.60576	36.3692	12.699	13.6362		0.769559	0.0463207	0.00735608
	ENSMUSG00000110702	predicted gene 45767 [Source:MGI Symbol;Acc:MGI:5804882]	Gm45767	0.0506162	0.0750862	0.0178715	0.248689	0.131859	0.171797		2.04862	0.0463415	0.00736531
	ENSMUSG00000028756	PTEN induced putative kinase 1 [Source:MGI Symbol;Acc:MGI:1916193]	Pink1	16.928	16.6558	17.7478	19.4255	21.4195	18.9704		0.232179	0.0463829	0.00738373
	ENSMUSG00000085030	RIKEN cDNA 2810455O05 gene [Source:MGI Symbol;Acc:MGI:1920072]	2810455O05Rik	2.18437	2.43029	2.07275	3.72649	3.05862	3.11123		0.552644	0.0463829	0.00738333
	ENSMUSG00000061119	prolylcarboxypeptidase (angiotensinase C) [Source:MGI Symbol;Acc:MGI:1919711]	Prcp	6.88759	6.29239	6.46521	5.15859	5.44846	5.47777		-0.241365	0.0464099	0.00739844
	ENSMUSG00000030717	nuclear protein transcription regulator 1 [Source:MGI Symbol;Acc:MGI:1891834]	Nupr1	4.63741	5.63061	5.31741	1.85486	2.91854	4.18543		-0.655755	0.0464099	0.00739987
	ENSMUSG00000097431	predicted gene, 26782 [Source:MGI Symbol;Acc:MGI:5477276]	Gm26782	15.588	12.5446	14.3915	11.3873	11.7785	12.2735		-0.229883	0.0465284	0.00742471
	ENSMUSG00000111375	BTB (POZ) domain containing 8 [Source:MGI Symbol;Acc:MGI:3646208]	Btbd8	4.02047	4.01978	4.10784	3.00684	3.13058	3.35614		-0.321546	0.046562	0.00743601
	ENSMUSG00000073755	RIKEN cDNA 5730409E04Rik gene [Source:MGI Symbol;Acc:MGI:3609248]	5730409E04Rik	0.239564	0.0394867	0.11278	0.261563	0.249634	0.425914		1.45959	0.0465631	0.00744212
	ENSMUSG00000024241	SOS Ras/Rac guanine nucleotide exchange factor 1 [Source:MGI Symbol;Acc:MGI:98354]	Sos1	15.2977	15.4413	15.473	14.8348	14.249	13.0809		-0.144942	0.0466559	0.00746292
	ENSMUSG00000024661	ferritin heavy polypeptide 1 [Source:MGI Symbol;Acc:MGI:95588]	Fth1	629.858	689.576	657.124	486.754	589.933	576.792		-0.182938	0.0467933	0.00749575
	ENSMUSG00000032041	toll-interleukin 1 receptor (TIR) domain-containing adaptor protein [Source:MGI Symbol;Acc:MGI:2152213]	Tirap	13.6764	12.8538	13.2629	9.63954	12.0062	10.7873		-0.221959	0.0467933	0.00750282
	ENSMUSG00000052302	TBC1 domain family, member 30 [Source:MGI Symbol;Acc:MGI:1921944]	Tbc1d30	3.36021	3.03489	2.91763	1.5349	2.34025	2.39404		-0.392786	0.0467933	0.00749994
	ENSMUSG00000038312	ER degradation enhancer, mannosidase alpha-like 2 [Source:MGI Symbol;Acc:MGI:1915540]	Edem2	67.4981	69.0936	72.0027	56.2277	63.7359	62.4176		-0.155266	0.046797	0.00750939
	ENSMUSG00000040918	solute carrier family 19 (thiamine transporter), member 2 [Source:MGI Symbol;Acc:MGI:1928761]	Slc19a2	38.8878	42.0872	40.2463	42.82	48.2632	41.8236		0.169394	0.0468302	0.00752068
	ENSMUSG00000068631	predicted gene 7676 [Source:MGI Symbol;Acc:MGI:3644053]	Gm7676	24.6058	28.9863	19.6753	26.0752	33.9353	31.5812		0.543656	0.0468842	0.00753535
	ENSMUSG00000049932	H2A.X variant histone [Source:MGI Symbol;Acc:MGI:102688]	H2ax	96.7478	117.043	123.682	232.208	138.272	133.29		0.319328	0.0469271	0.00756021
	ENSMUSG00000030533	unc-45 myosin chaperone A [Source:MGI Symbol;Acc:MGI:2142246]	Unc45a	20.5489	22.8238	22.0874	16.5718	20.166	18.3441		-0.188925	0.0469271	0.00754958
	ENSMUSG00000111656	predicted gene, 47232 [Source:MGI Symbol;Acc:MGI:6096048]	Gm47232	1.86608	1.05456	1.88249	1.60084	0.277787	0.90481		-1.42696	0.0469271	0.00755907
	ENSMUSG00000005045	chromodomain helicase DNA binding protein 5 [Source:MGI Symbol;Acc:MGI:3036258]	Chd5	0.421586	0.262072	0.297706	0.157817	0.175722	0.151852		-0.878629	0.0470724	0.00758963
	ENSMUSG00000026708	centromere protein L [Source:MGI Symbol;Acc:MGI:1917704]	Cenpl	18.6877	18.301	18.5352	24.52	21.6698	19.4982		0.195901	0.0470786	0.00760729
	ENSMUSG00000022636	activated leukocyte cell adhesion molecule [Source:MGI Symbol;Acc:MGI:1313266]	Alcam	21.786	19.8142	21.6686	15.7161	17.7864	19.0991		-0.212212	0.0470786	0.00760594
	ENSMUSG00000031570	phospholipid phosphatase 5 [Source:MGI Symbol;Acc:MGI:1919160]	Plpp5	15.0831	15.855	15.8496	11.4313	12.8874	11.9299		-0.330745	0.0470786	0.00760991
	ENSMUSG00000020424	cytosolic arginine sensor for mTORC1 subunit 1 [Source:MGI Symbol;Acc:MGI:1919212]	Castor1	10.267	9.86354	11.4448	19.2968	14.6723	12.161		0.371007	0.0470786	0.00761467
	ENSMUSG00000000290	integrin beta 2 [Source:MGI Symbol;Acc:MGI:96611]	Itgb2	756.536	788.32	768.114	636.881	709.593	686.922		-0.137017	0.0472802	0.00771986
	ENSMUSG00000021377	DEK proto-oncogene (DNA binding) [Source:MGI Symbol;Acc:MGI:1926209]	Dek	452.225	424.976	471.772	579.065	485.395	489.469		0.138064	0.0472802	0.00765392
	ENSMUSG00000023004	tubulin, alpha 1B [Source:MGI Symbol;Acc:MGI:107804]	Tuba1b	275.986	288.343	285.357	352.212	305.163	303.456		0.137398	0.0472802	0.00770498
	ENSMUSG00000031197	von Hippel-Lindau binding protein 1 [Source:MGI Symbol;Acc:MGI:1333804]	Vbp1	144.45	148.317	147.157	161.439	165.698	151.473		0.132055	0.0472802	0.00769618
	ENSMUSG00000019923	ZW10 interactor [Source:MGI Symbol;Acc:MGI:1289227]	Zwint	118.059	124.145	121.79	99.7951	107.342	111.155		-0.150335	0.0472802	0.00766782
	ENSMUSG00000020272	serine/threonine kinase 10 [Source:MGI Symbol;Acc:MGI:1099439]	Stk10	90.0609	88.5386	94.4295	131.545	98.2987	100.241		0.165095	0.0472802	0.00773177
	ENSMUSG00000025862	stromal antigen 2 [Source:MGI Symbol;Acc:MGI:1098583]	Stag2	87.3435	84.9995	90.2416	113.264	94.1697	94.9436		0.140626	0.0472802	0.00768528
	ENSMUSG00000025171	ubiquitin domain containing 1 [Source:MGI Symbol;Acc:MGI:2385092]	Ubtd1	79.85	84.8557	85.7157	49.6052	71.7984	71.9269		-0.263375	0.0472802	0.00770771
	ENSMUSG00000079017	interferon, alpha-inducible protein 27 like 2A [Source:MGI Symbol;Acc:MGI:1924183]	Ifi27l2a	19.6954	26.3816	30.1049	67.5064	41.5661	43.518		0.736498	0.0472802	0.00772094
	ENSMUSG00000018986	schlafen 3 [Source:MGI Symbol;Acc:MGI:1329005]	Slfn3	25.8542	25.2676	24.7332	32.2188	27.6462	27.402		0.174901	0.0472802	0.00770132
	ENSMUSG00000028874	FGR proto-oncogene, Src family tyrosine kinase [Source:MGI Symbol;Acc:MGI:95527]	Fgr	14.9405	14.5096	14.3063	11.7123	11.9254	12.6339		-0.226534	0.0472802	0.00772636
	ENSMUSG00000025949	phosphoinositide kinase, FYVE type zinc finger containing [Source:MGI Symbol;Acc:MGI:1335106]	Pikfyve	6.15876	5.06277	5.35041	4.38228	4.98383	4.44582		-0.197665	0.0472802	0.00771096
	ENSMUSG00000040710	ST8 alpha-N-acetyl-neuraminide alpha-2,8-sialyltransferase 4 [Source:MGI Symbol;Acc:MGI:106018]	St8sia4	1.8615	1.41481	1.74863	4.03979	2.05349	2.26762		0.452182	0.0472802	0.00768518
	ENSMUSG00000032714	synapse defective 1, Rho GTPase, homolog 1 (C. elegans) [Source:MGI Symbol;Acc:MGI:1918959]	Syde1	0.070213	0.104157	0.0495815	0.268312	0.109746	0.272355		1.37208	0.0472802	0.00769945
	ENSMUSG00000087142	predicted gene 12454 [Source:MGI Symbol;Acc:MGI:3649695]	Gm12454	6.08089	4.6422	4.52007	3.72732	2.77916	3.20709		-0.630674	0.0473054	0.00774194
	ENSMUSG00000022637	Casitas B-lineage lymphoma b [Source:MGI Symbol;Acc:MGI:2146430]	Cblb	46.5026	47.0355	48.2613	42.8923	41.5676	40.0519		-0.196348	0.0474207	0.00777329
	ENSMUSG00000048154	lysine (K)-specific methyltransferase 2D [Source:MGI Symbol;Acc:MGI:2682319]	Kmt2d	27.0752	25.0123	26.9471	25.5525	22.981	21.0161		-0.229137	0.0474207	0.00777897
	ENSMUSG00000026915	spermatid perinuclear RNA binding protein [Source:MGI Symbol;Acc:MGI:104626]	Strbp	8.09797	8.49915	8.55578	9.13948	9.22015	9.2059		0.142093	0.0474207	0.00777164
	ENSMUSG00000110656	predicted gene, 20735 [Source:MGI Symbol;Acc:MGI:5434091]	Gm20735	0.93324	0.576837	0.370696	0.318418	0.121558	0.169689		-1.46042	0.0474751	0.00779396
	ENSMUSG00000031824	RIKEN cDNA 6430548M08 gene [Source:MGI Symbol;Acc:MGI:2443793]	6430548M08Rik	0.487782	0.671911	0.528979	0.171185	0.36306	0.253406		-0.878055	0.0475292	0.00780891
	ENSMUSG00000079614	SEH1-like (S. cerevisiae [Source:MGI Symbol;Acc:MGI:1919374]	Seh1l	93.5262	89.5852	98.028	118.629	99.6755	104.794		0.142274	0.0476644	0.0078372
	ENSMUSG00000022793	UDP-Gal:betaGlcNAc beta 1,4-galactosyltransferase, polypeptide 4 [Source:MGI Symbol;Acc:MGI:1928387]	B4galt4	0.970001	1.06588	1.04015	4.04018	1.64719	1.49808		0.753262	0.047691	0.00784767
	ENSMUSG00000030534	vacuolar protein sorting 33B [Source:MGI Symbol;Acc:MGI:2446237]	Vps33b	35.5502	33.5792	34.9203	30.863	31.4653	30.7338		-0.142513	0.0477128	0.00787562
	ENSMUSG00000002910	arrestin domain containing 2 [Source:MGI Symbol;Acc:MGI:1918057]	Arrdc2	14.0359	12.3975	12.5849	10.9184	10.7554	10.4595		-0.249165	0.0477128	0.00787164
	ENSMUSG00000043587	2-phosphoxylose phosphatase 1 [Source:MGI Symbol;Acc:MGI:2442444]	Pxylp1	4.44973	3.95498	5.51545	10.2292	6.06496	5.95376		0.375697	0.0477128	0.00786624
	ENSMUSG00000033854	potassium channel, subfamily K, member 10 [Source:MGI Symbol;Acc:MGI:1919508]	Kcnk10	1.32875	1.31408	1.2263	1.01985	0.712863	1.09718		-0.480877	0.0477128	0.00785769
	ENSMUSG00000038213	TAP binding protein-like [Source:MGI Symbol;Acc:MGI:2384853]	Tapbpl	108.314	110.953	117.763	145.749	120.538	129.928		0.170089	0.0477135	0.00788183
	ENSMUSG00000047867	GTPase, IMAP family member 6 [Source:MGI Symbol;Acc:MGI:1918876]	Gimap6	117.048	113.078	122.688	173.688	132.874	127.915		0.188784	0.0477264	0.00789614
	ENSMUSG00000021257	angel homolog 1 [Source:MGI Symbol;Acc:MGI:1915987]	Angel1	14.7682	14.4517	15.086	13.8653	12.1279	13.3433		-0.198218	0.0477264	0.00789228
	ENSMUSG00000026192	5-aminoimidazole-4-carboxamide ribonucleotide formyltransferase/IMP cyclohydrolase [Source:MGI Symbol;Acc:MGI:1351352]	Atic	90.2047	89.9667	93.7414	107.516	98.4098	97.2605		0.118791	0.0477712	0.00790965
	ENSMUSG00000020130	TBC1 domain family, member 15 [Source:MGI Symbol;Acc:MGI:1913937]	Tbc1d15	53.5297	53.6622	53.946	68.2059	56.7959	61.3938		0.169943	0.0477748	0.00794042
	ENSMUSG00000037343	TATA-box binding protein associated factor 2 [Source:MGI Symbol;Acc:MGI:2443028]	Taf2	46.6386	41.1778	43.4818	43.1888	39.5227	38.1318		-0.133862	0.0477748	0.00792701
	ENSMUSG00000025583	regulatory associated protein of MTOR, complex 1 [Source:MGI Symbol;Acc:MGI:1921620]	Rptor	15.8437	15.5163	15.8534	14.5293	14.0899	13.9185		-0.148595	0.0477748	0.00794074
	ENSMUSG00000035762	transmembrane protein 161B [Source:MGI Symbol;Acc:MGI:1919995]	Tmem161b	14.7467	13.7272	14.3837	11.7537	13.5418	11.3869		-0.189931	0.0477748	0.00793366
	ENSMUSG00000030409	dystrophia myotonica-protein kinase [Source:MGI Symbol;Acc:MGI:94906]	Dmpk	1.73279	2.24094	1.37422	0.69855	1.27782	0.723848		-0.727409	0.0477748	0.00792816
	ENSMUSG00000001300	ephrin B2 [Source:MGI Symbol;Acc:MGI:105097]	Efnb2	0.85878	1.18236	0.820471	0.496398	0.508851	0.636846		-0.643511	0.0477977	0.00795064
	ENSMUSG00000033902	mitogen-activated protein kinase binding protein 1 [Source:MGI Symbol;Acc:MGI:1347004]	Mapkbp1	11.3881	9.70071	8.83529	7.74218	7.89538	7.67162		-0.266485	0.0479337	0.00797939
	ENSMUSG00000033618	mitogen-activated protein kinase kinase kinase 13 [Source:MGI Symbol;Acc:MGI:2444243]	Map3k13	0.278177	0.275106	0.243208	0.159092	0.16564	0.102766		-0.87537	0.0479358	0.00798585
	ENSMUSG00000079523	thymosin, beta 10 [Source:MGI Symbol;Acc:MGI:109146]	Tmsb10	2253.96	2439.95	2342.58	2735.52	2589.55	2522.55		0.150931	0.0479884	0.00800687
	ENSMUSG00000038648	cAMP responsive element binding protein 3-like 2 [Source:MGI Symbol;Acc:MGI:2442695]	Creb3l2	3.53438	3.46402	3.12259	1.86891	2.93975	2.12103		-0.400832	0.0479884	0.00800617
	ENSMUSG00000043931	GTPase, IMAP family member 7 [Source:MGI Symbol;Acc:MGI:1349657]	Gimap7	92.0959	80.7685	87.9979	114.809	97.7776	96.1944		0.196019	0.0480413	0.00802182
	ENSMUSG00000040794	C1q and tumor necrosis factor related protein 4 [Source:MGI Symbol;Acc:MGI:1914695]	C1qtnf4	0.447404	0.530958	0.379126	0.0976977	0	0.173547		-2.16748	0.0481871	0.00805233
	ENSMUSG00000017747	GH3 domain containing [Source:MGI Symbol;Acc:MGI:1931556]	Ghdc	13.2925	12.8489	11.7484	8.38015	8.93625	10.8528		-0.32297	0.0483094	0.00807894
	ENSMUSG00000000168	dihydrolipoamide S-acetyltransferase (E2 component of pyruvate dehydrogenase complex) [Source:MGI Symbol;Acc:MGI:2385311]	Dlat	51.3128	53.3398	54.8529	42.1476	47.1675	48.9814		-0.162375	0.0484557	0.00810959
	ENSMUSG00000024791	cell division cycle associated 5 [Source:MGI Symbol;Acc:MGI:1915099]	Cdca5	63.5977	71.8502	71.6724	99.865	78.8132	75.9222		0.199269	0.0485325	19.2545
	ENSMUSG00000059920	RIKEN cDNA 4930453N24 gene [Source:MGI Symbol;Acc:MGI:1914859]	4930453N24Rik	34.3108	32.0128	35.4388	43.1401	36.3596	37.5259		0.14135	0.0485325	0.0081596
	ENSMUSG00000038446	cell division cycle 40 [Source:MGI Symbol;Acc:MGI:1918963]	Cdc40	31.2659	32.1186	31.6162	36.4281	33.5339	34.5402		0.130504	0.0485325	1.06279
	ENSMUSG00000039427	asparagine-linked glycosylation 1 (beta-1,4-mannosyltransferase) [Source:MGI Symbol;Acc:MGI:2384774]	Alg1	30.3424	31.4121	33.8874	27.4428	27.5366	29.0905		-0.191242	0.0485325	0.00815912
	ENSMUSG00000037415	RAN binding protein 10 [Source:MGI Symbol;Acc:MGI:1921584]	Ranbp10	28.341	26.238	26.5853	25.2739	23.2638	22.572		-0.197097	0.0485325	0.0081664
	ENSMUSG00000037847	nicotinamide riboside kinase 1 [Source:MGI Symbol;Acc:MGI:2147434]	Nmrk1	9.63743	7.89097	8.50695	7.55019	6.52111	7.10043		-0.302492	0.0485325	0.00816827
	ENSMUSG00000022914	bromodomain and WD repeat domain containing 1 [Source:MGI Symbol;Acc:MGI:1890651]	Brwd1	8.65726	7.31206	7.93014	7.20882	6.98679	6.56835		-0.199304	0.0485325	0.00815851
	ENSMUSG00000113780	predicted gene, 33195 [Source:MGI Symbol;Acc:MGI:5592354]	Gm33195	0.691494	0.586167	0.871973	0.323569	0.411748	0.239491		-1.17743	0.0485325	0.008172
	ENSMUSG00000028245	neutral sphingomyelinase (N-SMase) activation associated factor [Source:MGI Symbol;Acc:MGI:1341864]	Nsmaf	73.4957	71.0201	74.5473	67.3676	68.5067	65.5335		-0.113443	0.0485583	0.0081827
	ENSMUSG00000099034	RIKEN cDNA 2810039B14 gene [Source:MGI Symbol;Acc:MGI:1919915]	2810039B14Rik	0.431649	0.249016	0.165107	0.412376	0.393568	0.41859		0.897662	0.0485583	0.00818875
	ENSMUSG00000026014	Ras association (RalGDS/AF-6) and pleckstrin homology domains 1 [Source:MGI Symbol;Acc:MGI:1924550]	Raph1	9.14521	7.33454	8.25141	6.33901	6.93009	6.72239		-0.258143	0.0485602	0.00819527
	ENSMUSG00000037049	sphingomyelin phosphodiesterase 1, acid lysosomal [Source:MGI Symbol;Acc:MGI:98325]	Smpd1	42.201	42.6931	45.2872	34.8971	40.118	38.2743		-0.165704	0.0486349	0.00821456
	ENSMUSG00000084349	ribosomal protein L3, pseudogene 1 [Source:MGI Symbol;Acc:MGI:3644217]	Rpl3-ps1	19.7471	16.8875	17.5823	28.3307	22.0683	20.7224		0.320742	0.0486349	0.00822568
	ENSMUSG00000000244	tetraspanin 32 [Source:MGI Symbol;Acc:MGI:1350360]	Tspan32	1.12949	0.787409	1.18986	3.07292	2.27675	1.22101		0.738437	0.0486349	0.0082265
	ENSMUSG00000030587	RIKEN cDNA 2200002D01 gene [Source:MGI Symbol;Acc:MGI:1919525]	2200002D01Rik	0.295218	0	0	0.402909	0.23072	0.143143		2.24792	0.0486796	0.00824028
	ENSMUSG00000047804	A kinase (PRKA) anchor protein 10 [Source:MGI Symbol;Acc:MGI:1890218]	Akap10	26.1422	23.5709	25.309	22.0372	22.2813	22.6444		-0.144083	0.0487297	0.00825497
	ENSMUSG00000034354	myotubularin related protein 3 [Source:MGI Symbol;Acc:MGI:1921552]	Mtmr3	49.2875	42.7709	45.0529	81.584	51.7396	51.7794		0.270319	0.048799	0.00828943
	ENSMUSG00000054280	proline rich 14-like [Source:MGI Symbol;Acc:MGI:2443658]	Prr14l	31.7372	28.4457	30.2869	28.8359	27.2779	26.9783		-0.126189	0.048799	0.00827369
	ENSMUSG00000028273	PDZ and LIM domain 5 [Source:MGI Symbol;Acc:MGI:1927489]	Pdlim5	17.6715	15.9718	17.0333	13.3455	13.3872	15.8758		-0.213344	0.048799	0.00828592
	ENSMUSG00000026904	solute carrier family 4, sodium bicarbonate cotransporter-like, member 10 [Source:MGI Symbol;Acc:MGI:2150150]	Slc4a10	1.74295	1.59932	1.6749	0.823982	1.23577	1.30687		-0.433859	0.048799	0.00829164
	ENSMUSG00000048249	CREB3 regulatory factor [Source:MGI Symbol;Acc:MGI:1924378]	Crebrf	5.35098	5.57184	4.95887	10.89	7.00849	6.14326		0.438864	0.0489695	0.00832686
	ENSMUSG00000018008	cytohesin 4 [Source:MGI Symbol;Acc:MGI:2441702]	Cyth4	112.022	96.8331	102.16	92.0526	85.7678	95.5297		-0.169509	0.0491	0.00835767
	ENSMUSG00000075595	zinc finger protein 652 [Source:MGI Symbol;Acc:MGI:2442221]	Zfp652	27.6243	26.6985	29.9099	27.1335	25.7091	25.4549		-0.135604	0.0491	0.00836158
	ENSMUSG00000005410	minichromosome maintenance complex component 5 [Source:MGI Symbol;Acc:MGI:103197]	Mcm5	359.819	374.831	390.821	459.459	404.705	409.935		0.134225	0.0491151	0.00837042
	ENSMUSG00000021610	CLPTM1-like [Source:MGI Symbol;Acc:MGI:2442892]	Clptm1l	221.492	215.922	221.103	179.761	197.399	201.912		-0.137997	0.0491402	0.00839173
	ENSMUSG00000029478	nuclear receptor co-repressor 2 [Source:MGI Symbol;Acc:MGI:1337080]	Ncor2	34.9702	32.9953	40.0722	37.1963	31.2229	29.8359		-0.237219	0.0491402	0.00839979
	ENSMUSG00000041406	cDNA sequence BC055324 [Source:MGI Symbol;Acc:MGI:3590554]	BC055324	18.5056	16.8977	17.7251	25.4005	19.0514	19.8887		0.191565	0.0491402	0.00839929
	ENSMUSG00000076840	T cell receptor alpha variable 14-1 [Source:MGI Symbol;Acc:MGI:3646773]	Trav14-1	7.81106	7.15263	8.17163	12.0029	14.7715	11.2218		0.718061	0.0491402	0.00839702
	ENSMUSG00000039236	interferon-stimulated protein [Source:MGI Symbol;Acc:MGI:1928895]	Isg20	99.7912	105.993	101.715	74.1273	83.486	91.7771		-0.23206	0.0491752	0.00841753
	ENSMUSG00000072294	Kruppel-like factor 12 [Source:MGI Symbol;Acc:MGI:1333796]	Klf12	0.0991526	0.130744	0.128365	0.61346	0.20664	0.272433		1.06709	0.0491752	0.00841833
	ENSMUSG00000028560	ubiquitin specific peptidase 1 [Source:MGI Symbol;Acc:MGI:2385198]	Usp1	213.884	214.092	224.906	263.167	238.953	226.305		0.11742	0.0492105	0.0084495
	ENSMUSG00000020014	cilia and flagella associated protein 54 [Source:MGI Symbol;Acc:MGI:1922208]	Cfap54	2.07293	1.90195	2.11503	1.91046	1.71655	1.61276		-0.268715	0.0492105	0.00844162
	ENSMUSG00000045658	phosphotyrosine interaction domain containing 1 [Source:MGI Symbol;Acc:MGI:2138391]	Pid1	0.734504	0.810212	0.668295	0.107955	0.471001	0.383537		-0.884045	0.0492105	0.0084481
	ENSMUSG00000054939	zinc finger protein 174 [Source:MGI Symbol;Acc:MGI:2686600]	Zfp174	0.293616	0.34845	0.248807	0.106859	0.14278	0.113893		-1.0469	0.0492105	0.00844586
	ENSMUSG00000074063	oxidative stress induced growth inhibitor 1 [Source:MGI Symbol;Acc:MGI:1919089]	Osgin1	78.9967	96.5673	83.0666	27.6191	62.1202	67.8995		-0.492875	0.0494527	0.00849741
	ENSMUSG00000024236	supervillin [Source:MGI Symbol;Acc:MGI:2147319]	Svil	15.6086	14.9989	15.8972	13.9916	14.0728	13.2953		-0.17006	0.0494594	0.00850486
	ENSMUSG00000047515	cDNA sequence BC049715 [Source:MGI Symbol;Acc:MGI:3605234]	BC049715	2.46508	1.89023	2.01825	1.8138	1.41464	1.62831		-0.404148	0.0495269	0.00854176
	ENSMUSG00000084941	predicted gene 11944 [Source:MGI Symbol;Acc:MGI:3702312]	Gm11944	1.32222	0.91534	1.58729	3.03165	0.13778	0.641111		-1.61433	0.0495269	0.00853674
	ENSMUSG00000103199	predicted gene, 37648 [Source:MGI Symbol;Acc:MGI:5610876]	Gm37648	1.08089	0.97988	1.36754	0.196691	0.563162	0.873492		-0.927851	0.0495269	0.00854128
	ENSMUSG00000028758	kinesin family member 17 [Source:MGI Symbol;Acc:MGI:1098229]	Kif17	0.806147	0.647764	0.836112	0.357571	0.315012	0.635178		-0.818875	0.0495269	0.0085334
	ENSMUSG00000050232	chemokine (C-X-C motif) receptor 3 [Source:MGI Symbol;Acc:MGI:1277207]	Cxcr3	52.5471	42.2067	57.5905	108.556	60.8706	68.5466		0.376399	0.0497577	0.00858793
	ENSMUSG00000062933	predicted pseudogene 10123 [Source:MGI Symbol;Acc:MGI:3704342]	Gm10123	48.9989	52.1856	49.5726	61.4718	60.3864	58.2534		0.270903	0.0498539	0.00861089
	ENSMUSG00000042377	family with sequence similarity 83, member G [Source:MGI Symbol;Acc:MGI:1916890]	Fam83g	1.80278	1.42288	1.51787	0.359599	0.939279	1.24394		-0.650885	0.0499751	0.0086382
	ENSMUSG00000049800	SERTA domain containing 2 [Source:MGI Symbol;Acc:MGI:1931026]	Sertad2	28.3487	29.815	28.039	20.1981	26.0371	23.2793		-0.217807	0.0500125	0.00866122
	ENSMUSG00000038973	claudin domain containing 2 [Source:MGI Symbol;Acc:MGI:1921526]	Cldnd2	27.8569	21.5329	23.4022	22.7239	15.348	17.5437		-0.472467	0.0500125	0.00865753
	ENSMUSG00000021678	coagulation factor II (thrombin) receptor-like 1 [Source:MGI Symbol;Acc:MGI:101910]	F2rl1	17.603	11.2865	14.423	20.369	17.5091	17.683		0.342813	0.0500125	0.00866383
	ENSMUSG00000021271	zinc finger protein 839 [Source:MGI Symbol;Acc:MGI:1920055]	Zfp839	3.5408	3.19722	2.95696	1.84893	2.08544	2.32893		-0.501466	0.0500564	0.00867782
	ENSMUSG00000050229	phosphatidylinositol glycan anchor biosynthesis, class M [Source:MGI Symbol;Acc:MGI:1914806]	Pigm	29.1861	25.7962	28.2713	29.8641	24.6646	23.7094		-0.156908	0.0500812	0.00870048
	ENSMUSG00000075122	CD80 antigen [Source:MGI Symbol;Acc:MGI:101775]	Cd80	20.3554	19.6683	17.1917	25.628	22.0555	19.8907		0.243532	0.0500812	30.3534
	ENSMUSG00000068606	predicted gene 4841 [Source:MGI Symbol;Acc:MGI:3643814]	Gm4841	5.04168	3.13638	4.27802	7.54671	5.33833	5.40173		0.439426	0.0500812	0.0087013
	ENSMUSG00000109243	predicted gene 45867 [Source:MGI Symbol;Acc:MGI:5804982]	Gm45867	3.28804	2.75906	2.95512	1.90378	2.28416	1.93246		-0.485588	0.0500857	0.00870848
	ENSMUSG00000039952	dystroglycan 1 [Source:MGI Symbol;Acc:MGI:101864]	Dag1	13.1282	14.0428	13.9764	11.9349	11.9582	12.0267		-0.186568	0.0501376	0.0087239
	ENSMUSG00000067377	tetraspanin 6 [Source:MGI Symbol;Acc:MGI:1926264]	Tspan6	0.336204	0.443324	0.237414	0.795335	0.700672	0.489049		1.03176	0.0502212	0.00874485
	ENSMUSG00000008690	non-SMC condensin II complex, subunit H2 [Source:MGI Symbol;Acc:MGI:1289164]	Ncaph2	149.773	159.487	157.879	203.305	166.985	165.427		0.132881	0.0502318	0.0087531
	ENSMUSG00000005514	P450 (cytochrome) oxidoreductase [Source:MGI Symbol;Acc:MGI:97744]	Por	79.7763	80.6275	89.0936	71.9321	74.1255	75.8595		-0.169221	0.0502411	0.00877594
	ENSMUSG00000057963	inositol 1,3,4-triphosphate 5/6 kinase [Source:MGI Symbol;Acc:MGI:2446159]	Itpk1	35.0463	31.5304	33.8324	29.4197	29.527	30.2098		-0.152469	0.0502411	0.00877514
	ENSMUSG00000021485	Max dimerization protein 3 [Source:MGI Symbol;Acc:MGI:104987]	Mxd3	25.8244	23.4673	28.4552	49.5821	30.7178	30.5715		0.278775	0.0502411	0.00879064
	ENSMUSG00000025525	apolipoprotein O-like [Source:MGI Symbol;Acc:MGI:1915367]	Apool	17.8476	18.895	18.4022	23.0296	20.4955	19.8123		0.169238	0.0502411	0.00876855
	ENSMUSG00000036620	mannoside acetylglucosaminyltransferase 4, isoenzyme B [Source:MGI Symbol;Acc:MGI:2143974]	Mgat4b	15.368	14.1068	15.7988	13.8128	13.4482	12.3506		-0.221421	0.0502411	0.00878932
	ENSMUSG00000104728	predicted gene 42462 [Source:MGI Symbol;Acc:MGI:5662599]	Gm42462	1.18564	2.01008	1.8539	1.29451	0.882479	0.821262		-0.903737	0.0502411	0.00879322
	ENSMUSG00000029407	USO1 vesicle docking factor [Source:MGI Symbol;Acc:MGI:1929095]	Uso1	94.4841	93.695	98.004	75.1179	85.0634	87.8159		-0.157572	0.0502682	0.00881079
	ENSMUSG00000002996	high mobility group box transcription factor 1 [Source:MGI Symbol;Acc:MGI:894659]	Hbp1	5.42804	6.10856	5.39272	10.5246	7.52859	6.47995		0.412317	0.0502682	0.00880614
	ENSMUSG00000019996	microtubule-associated protein 7 [Source:MGI Symbol;Acc:MGI:1328328]	Map7	6.34248	6.33001	6.84146	4.66954	5.21449	5.31829		-0.330561	0.050442	0.00885127
	ENSMUSG00000027082	tissue factor pathway inhibitor [Source:MGI Symbol;Acc:MGI:1095418]	Tfpi	0.993084	1.1075	1.28318	1.66102	2.22377	1.51627		0.643129	0.050442	0.00885413
	ENSMUSG00000055850	ring finger protein 181 [Source:MGI Symbol;Acc:MGI:1913760]	Rnf181	54.0827	52.7273	54.9494	48.0324	50.0894	46.8887		-0.144831	0.0504773	0.00886677
	ENSMUSG00000111027	predicted gene 2981 [Source:MGI Symbol;Acc:MGI:3781159]	Gm2981	0.831629	1.80939	0.93962	1.81599	2.77307	1.77423		1.03421	0.0504887	0.00887522
	ENSMUSG00000028873	cell division cycle associated 8 [Source:MGI Symbol;Acc:MGI:1196274]	Cdca8	70.2124	71.1794	78.8826	93.847	84.525	78.7479		0.159254	0.0505252	6.54401
	ENSMUSG00000021182	coiled-coil domain containing 88C [Source:MGI Symbol;Acc:MGI:1915589]	Ccdc88c	83.0598	73.6811	80.5169	80.05	72.6382	69.4869		-0.124577	0.050748	0.00893375
	ENSMUSG00000034330	phospholipase C, gamma 2 [Source:MGI Symbol;Acc:MGI:97616]	Plcg2	58.9236	65.3914	62.0538	37.4747	56.9786	48.911		-0.260829	0.0508276	0.00895425
	ENSMUSG00000032412	ATPase, Na+/K+ transporting, beta 3 polypeptide [Source:MGI Symbol;Acc:MGI:107788]	Atp1b3	327.108	321.778	337.819	408.688	356.012	352.682		0.133373	0.0508766	0.00896939
	ENSMUSG00000002808	ependymin related protein 1 (zebrafish) [Source:MGI Symbol;Acc:MGI:2145369]	Epdr1	1.51384	1.45554	1.87077	1.1019	1.22692	0.937914		-0.626536	0.051096	0.00901458
	ENSMUSG00000039599	family with sequence similarity 149, member B [Source:MGI Symbol;Acc:MGI:2145567]	Fam149b	8.84146	7.79661	8.48939	9.21092	9.35384	9.18129		0.158862	0.0511462	0.00902997
	ENSMUSG00000098286	microRNA 8091 [Source:MGI Symbol;Acc:MGI:5530957]	Mir8091	11.6261	15.6041	14.074	17.2271	26.8255	20.938		0.745305	0.0512409	0.00905324
	ENSMUSG00000024143	ras homolog family member Q [Source:MGI Symbol;Acc:MGI:1931553]	Rhoq	115.931	106.428	106.294	63.2124	92.8701	95.5153		-0.241812	0.0512534	0.00906852
	ENSMUSG00000032491	neurotrophin receptor associated death domain [Source:MGI Symbol;Acc:MGI:1914419]	Nradd	13.1503	11.9999	10.004	10.6817	7.54658	7.94716		-0.435905	0.0512534	0.00906361
	ENSMUSG00000027342	proliferating cell nuclear antigen [Source:MGI Symbol;Acc:MGI:97503]	Pcna	502.506	528.257	533.938	631.62	563.822	575.921		0.147759	0.0516331	0.00914927
	ENSMUSG00000026288	inositol polyphosphate-5-phosphatase D [Source:MGI Symbol;Acc:MGI:107357]	Inpp5d	157.369	152.779	160.065	130.324	140.598	144.995		-0.139933	0.0516331	0.00915548
	ENSMUSG00000025742	phosphoribosyl pyrophosphate synthetase 2 [Source:MGI Symbol;Acc:MGI:97776]	Prps2	63.4523	58.6844	65.0328	83.239	67.7964	68.1512		0.151082	0.0516331	0.00914851
	ENSMUSG00000032064	DIX domain containing 1 [Source:MGI Symbol;Acc:MGI:2679721]	Dixdc1	2.44266	2.09513	2.20723	0.303352	1.53202	1.52678		-0.74273	0.0518518	0.00920089
	ENSMUSG00000022995	ENAH actin regulator [Source:MGI Symbol;Acc:MGI:108360]	Enah	4.28316	4.0922	4.14552	6.39785	5.33228	4.1588		0.244981	0.0518533	0.00920777
	ENSMUSG00000032540	abhydrolase domain containing 5 [Source:MGI Symbol;Acc:MGI:1914719]	Abhd5	16.7641	16.0424	15.6017	11.1303	14.3991	13.5882		-0.19922	0.0518673	0.00921688
	ENSMUSG00000027593	hnRNP-associated with lethal yellow [Source:MGI Symbol;Acc:MGI:97850]	Raly	281.002	298.914	305.051	369.055	327.012	319.526		0.153249	0.0518822	0.00923277
	ENSMUSG00000084128	epithelial splicing regulatory protein 2 [Source:MGI Symbol;Acc:MGI:1924661]	Esrp2	1.27665	1.34146	1.31471	0.261353	0.803727	0.980102		-0.704756	0.0518822	0.00923055
	ENSMUSG00000000078	Kruppel-like factor 6 [Source:MGI Symbol;Acc:MGI:1346318]	Klf6	160.409	140.206	158.959	198.56	164.713	169.398		0.152583	0.0519501	0.00925148
	ENSMUSG00000018819	lymphocyte specific 1 [Source:MGI Symbol;Acc:MGI:96832]	Lsp1	259.037	270.497	261.283	316.244	277.225	278.071		0.113217	0.0520128	0.00928921
	ENSMUSG00000076488	T cell receptor beta joining 1-6 [Source:MGI Symbol;Acc:MGI:4439575]	Trbj1-6	104.541	86.1555	101.506	116.518	54.4673	52.8009		-0.738584	0.0520128	0.0092778
	ENSMUSG00000027580	helicase with zinc finger 2, transcriptional coactivator [Source:MGI Symbol;Acc:MGI:2385169]	Helz2	31.9087	30.7545	32.6288	28.3565	29.4315	28.419		-0.131353	0.0520128	0.00928688
	ENSMUSG00000020359	5-phosphohydroxy-L-lysine phospholyase [Source:MGI Symbol;Acc:MGI:1920197]	Phykpl	6.39097	5.19052	5.76526	4.14513	4.97299	4.91654		-0.224229	0.0520128	0.00928015
	ENSMUSG00000037089	solute carrier family 35, member B2 [Source:MGI Symbol;Acc:MGI:1921086]	Slc35b2	29.5918	31.2872	31.4235	40.427	34.7869	32.4818		0.161478	0.0520606	0.00931295
	ENSMUSG00000037349	nudix (nucleoside diphosphate linked moiety X)-type motif 22 [Source:MGI Symbol;Acc:MGI:1915573]	Nudt22	10.6254	13.0873	11.0502	9.91366	8.45496	8.61782		-0.37017	0.0520606	0.00932315
	ENSMUSG00000109241	predicted gene 7434 [Source:MGI Symbol;Acc:MGI:3644530]	Gm7434	1.6975	4.47671	4.99461	8.03132	6.48579	8.23073		0.896732	0.0520606	0.00930714
	ENSMUSG00000047905	predicted pseudogene 8566 [Source:MGI Symbol;Acc:MGI:3647296]	Gm8566	0.744711	2.20947	2.45412	3.25239	3.62139	4.81454		1.07574	0.0520606	0.00932433
	ENSMUSG00000030707	coronin, actin binding protein 1A [Source:MGI Symbol;Acc:MGI:1345961]	Coro1a	1614.61	1782.4	1776.72	2153.2	1893.82	1874.43		0.150358	0.0520951	0.00937196
	ENSMUSG00000076137	NA	NA	38.8265	19.7179	12.5973	43.5376	42.6454	31.5461		1.11667	0.0520951	0.00935699
	ENSMUSG00000030451	HECT and RLD domain containing E3 ubiquitin protein ligase 2 [Source:MGI Symbol;Acc:MGI:103234]	Herc2	14.7936	13.5364	15.229	13.8458	12.3219	12.6436		-0.207624	0.0520951	0.00934495
	ENSMUSG00000024219	ankyrin repeat and SAM domain containing 1 [Source:MGI Symbol;Acc:MGI:2446180]	Anks1	10.2835	8.9649	9.7467	9.74818	7.98636	8.50357		-0.191461	0.0520951	0.00936906
	ENSMUSG00000039164	nuclear apoptosis inducing factor 1 [Source:MGI Symbol;Acc:MGI:1918504]	Naif1	6.62792	6.11287	7.71296	5.36644	5.69076	5.7293		-0.310855	0.0520951	0.00937707
	ENSMUSG00000061143	mastermind like transcriptional coactivator 3 [Source:MGI Symbol;Acc:MGI:2389461]	Maml3	2.35572	2.63454	2.75179	6.61039	3.64769	3.5014		0.537736	0.0520951	0.00934916
	ENSMUSG00000045071	RIKEN cDNA E130308A19 gene [Source:MGI Symbol;Acc:MGI:2442164]	E130308A19Rik	1.92172	1.66743	1.77951	1.7122	1.36019	1.42406		-0.308893	0.0520951	0.00937252
	ENSMUSG00000012126	UBX domain protein 11 [Source:MGI Symbol;Acc:MGI:1914836]	Ubxn11	12.4388	10.496	10.6574	11.1625	7.99005	9.51307		-0.27954	0.0522758	0.00941626
	ENSMUSG00000082480	predicted gene 11687 [Source:MGI Symbol;Acc:MGI:3652085]	Gm11687	1.56339	1.93266	1.288	2.41818	3.12244	2.90584		1.01465	0.0523029	0.00942782
	ENSMUSG00000063511	small nuclear ribonucleoprotein 70 (U1) [Source:MGI Symbol;Acc:MGI:98341]	Snrnp70	163.251	153.687	162.767	164.263	147.834	137.711		-0.132069	0.0523891	0.00949479
	ENSMUSG00000031093	dedicator of cytokinesis 11 [Source:MGI Symbol;Acc:MGI:1923224]	Dock11	60.0387	57.3622	62.2985	78.6596	64.632	64.6914		0.138465	0.0523891	0.00947193
	ENSMUSG00000051341	zinc finger protein 52 [Source:MGI Symbol;Acc:MGI:99199]	Zfp52	57.3867	54.8411	55.389	37.4425	47.5197	48.9994		-0.224597	0.0523891	0.0094704
	ENSMUSG00000047153	KH and NYN domain containing [Source:MGI Symbol;Acc:MGI:2451333]	Khnyn	41.2758	37.3088	39.0134	39.1154	33.6131	32.7791		-0.194537	0.0523891	0.00949358
	ENSMUSG00000040857	Ets2 repressor factor [Source:MGI Symbol;Acc:MGI:109637]	Erf	14.5608	11.8682	13.0166	22.3968	15.8397	14.772		0.301755	0.0523891	0.0094743
	ENSMUSG00000075279	mitichondrial ribosomal protein L23, pseudogene 1 [Source:MGI Symbol;Acc:MGI:3650679]	Mrpl23-ps1	3.58232	3.93641	3.37291	6.51879	4.35504	7.71986		0.732047	0.0523891	0.00949687
	ENSMUSG00000059498	Fc receptor, IgG, low affinity III [Source:MGI Symbol;Acc:MGI:95500]	Fcgr3	3.72355	4.27427	4.46062	0.435588	3.04862	2.32129		-0.89053	0.0523891	0.00948544
	ENSMUSG00000028435	aquaporin 3 [Source:MGI Symbol;Acc:MGI:1333777]	Aqp3	1.76711	0.56173	1.29243	3.92767	2.43326	2.69288		1.20754	0.0523891	0.0094776
	ENSMUSG00000006728	cyclin-dependent kinase 4 [Source:MGI Symbol;Acc:MGI:88357]	Cdk4	276.016	292.154	288.566	379.991	311.237	301.947		0.145074	0.0524105	7.91025
	ENSMUSG00000002804	nudix (nucleoside diphosphate linked moiety X)-type motif 14 [Source:MGI Symbol;Acc:MGI:1913424]	Nudt14	13.0195	14.3145	15.1519	18.5035	19.4786	15.7997		0.301171	0.0524105	0.00952082
	ENSMUSG00000009647	mitochondrial calcium uniporter [Source:MGI Symbol;Acc:MGI:3026965]	Mcu	8.95349	8.55841	8.97854	6.54135	7.14478	8.1339		-0.225926	0.0524105	0.00951464
	ENSMUSG00000026623	lysophosphatidylglycerol acyltransferase 1 [Source:MGI Symbol;Acc:MGI:2446186]	Lpgat1	51.5113	48.0475	51.1887	45.6755	44.5881	46.3197		-0.135207	0.052418	0.00953766
	ENSMUSG00000039841	zinc finger protein 800 [Source:MGI Symbol;Acc:MGI:1889334]	Zfp800	43.1997	40.667	41.1188	38.4273	37.073	37.6061		-0.129217	0.052418	0.00954894
	ENSMUSG00000021608	lysophosphatidylcholine acyltransferase 1 [Source:MGI Symbol;Acc:MGI:2384812]	Lpcat1	7.77509	5.89017	6.73987	15.2368	8.12786	7.78152		0.348338	0.052418	0.00954492
	ENSMUSG00000067931	zinc finger protein 948 [Source:MGI Symbol;Acc:MGI:3040683]	Zfp948	10.3591	10.6322	8.6983	6.41555	7.98251	6.28912		-0.393162	0.052418	0.00954715
	ENSMUSG00000061689	DLG associated protein 4 [Source:MGI Symbol;Acc:MGI:2138865]	Dlgap4	13.9046	14.6156	13.8409	11.5874	12.6103	11.8945		-0.183271	0.0524336	0.00955849
	ENSMUSG00000059248	septin 9 [Source:MGI Symbol;Acc:MGI:1858222]	Septin9	433.752	437.098	452.879	398.698	407.957	402.503		-0.118984	0.0525168	0.00958921
	ENSMUSG00000111390	predicted gene, 48796 [Source:MGI Symbol;Acc:MGI:6098500]	Gm48796	2.02223	1.80637	2.14202	1.49569	1.56343	1.23356		-0.516979	0.0525168	0.0095903
	ENSMUSG00000030465	pleckstrin and Sec7 domain containing 3 [Source:MGI Symbol;Acc:MGI:1918215]	Psd3	0.988541	0.867565	1.03092	0.643302	0.920943	0.53328		-0.472126	0.0525168	0.00959377
	ENSMUSG00000036270	enhancer of mRNA decapping 4 [Source:MGI Symbol;Acc:MGI:2446249]	Edc4	60.6234	57.836	60.6187	60.5962	54.3971	52.7821		-0.126768	0.0527926	0.00965089
	ENSMUSG00000055629	beta-1,4-N-acetyl-galactosaminyl transferase 4 [Source:MGI Symbol;Acc:MGI:2652891]	B4galnt4	128.645	116.794	134.859	71.8489	101.422	107.637		-0.340361	0.0529779	0.00970788
	ENSMUSG00000055717	SLAIN motif family, member 1 [Source:MGI Symbol;Acc:MGI:2145578]	Slain1	35.7468	34.6222	35.767	46.5897	37.6888	39.301		0.15964	0.0529779	0.00970246
	ENSMUSG00000052539	membrane associated guanylate kinase, WW and PDZ domain containing 3 [Source:MGI Symbol;Acc:MGI:1923484]	Magi3	4.30831	4.22056	4.38175	5.78377	4.78587	5.11078		0.229383	0.0529779	0.00971181
	ENSMUSG00000068740	cadherin, EGF LAG seven-pass G-type receptor 2 [Source:MGI Symbol;Acc:MGI:1858235]	Celsr2	0.300782	0.2578	0.26904	0.470711	0.45969	0.340296		0.582869	0.0529779	0.00969418
	ENSMUSG00000078853	interferon gamma induced GTPase [Source:MGI Symbol;Acc:MGI:107729]	Igtp	518.294	490.385	522.894	669.667	582.612	572.589		0.206901	0.053049	0.00973161
	ENSMUSG00000027206	COP9 signalosome subunit 2 [Source:MGI Symbol;Acc:MGI:1330276]	Cops2	176.934	179.452	180.755	185.547	197.454	189.465		0.119437	0.0531108	0.00974974
	ENSMUSG00000114995	predicted gene, 49284 [Source:MGI Symbol;Acc:MGI:6118771]	Gm49284	1.90147	1.27209	1.46121	1.22122	0.815866	0.92197		-0.698968	0.0532191	0.00977641
	ENSMUSG00000031490	eukaryotic translation initiation factor 4E binding protein 1 [Source:MGI Symbol;Acc:MGI:103267]	Eif4ebp1	82.9983	94.6102	88.8615	50.9056	80.9	70.7003		-0.266217	0.0532858	0.00980226
	ENSMUSG00000078922	T cell specific GTPase 1 [Source:MGI Symbol;Acc:MGI:98734]	Tgtp1	39.2571	34.3002	39.5479	45.1427	42.3708	44.6005		0.205715	0.0532858	0.00979615
	ENSMUSG00000020607	LRAT domain containing 1 [Source:MGI Symbol;Acc:MGI:2145011]	Lratd1	0	0.0264986	0.0189211	0.0877646	0.0558412	0.0519675		1.44873	0.0533168	0.00981477
	ENSMUSG00000026393	NIMA (never in mitosis gene a)-related expressed kinase 7 [Source:MGI Symbol;Acc:MGI:1890645]	Nek7	60.2033	59.9102	63.2779	73.284	65.3267	68.216		0.14062	0.0535102	0.00986131
	ENSMUSG00000056367	ARP3 actin-related protein 3B [Source:MGI Symbol;Acc:MGI:2661120]	Actr3b	4.23641	4.47209	4.5714	2.85841	2.92645	3.64664		-0.457112	0.0535102	0.00986404
	ENSMUSG00000054499	death effector domain-containing DNA binding protein 2 [Source:MGI Symbol;Acc:MGI:1914629]	Dedd2	29.1036	30.1948	29.8191	26.2343	26.1238	26.3703		-0.16335	0.0535842	0.00991873
	ENSMUSG00000091086	ribosomal protein L6-like [Source:MGI Symbol;Acc:MGI:3647789]	Rpl6l	5.30104	4.32508	6.08299	8.10296	9.94294	6.29731		0.549001	0.0535842	0.00990396
	ENSMUSG00000046798	claudin 12 [Source:MGI Symbol;Acc:MGI:1929288]	Cldn12	5.65138	5.076	5.49454	3.30873	4.55182	4.23606		-0.325118	0.0535842	0.00991335
	ENSMUSG00000075245	predicted gene 6043 [Source:MGI Symbol;Acc:MGI:3805955]	Gm6043	2.11153	1.39215	1.82242	3.58622	3.42266	3.18523		0.902305	0.0535842	0.00989156
	ENSMUSG00000041594	transmembrane and tetratricopeptide repeat containing 4 [Source:MGI Symbol;Acc:MGI:1921050]	Tmtc4	1.44985	1.17189	1.4176	2.63324	1.65606	1.67637		0.36496	0.0535842	0.00991808
	ENSMUSG00000026490	CDC42 binding protein kinase alpha [Source:MGI Symbol;Acc:MGI:2441841]	Cdc42bpa	0.68651	0.663019	0.821862	0.433334	0.676244	0.431691		-0.489785	0.0535842	213.655
	ENSMUSG00000063015	cyclin I [Source:MGI Symbol;Acc:MGI:1341077]	Ccni	121.476	122.52	126.303	165.941	137.434	126.341		0.135668	0.0536959	0.00994626
	ENSMUSG00000060739	NSA2 ribosome biogenesis homolog [Source:MGI Symbol;Acc:MGI:1913883]	Nsa2	98.4464	103.315	98.9394	109.02	110.969	107.46		0.146887	0.0537716	0.00996713
	ENSMUSG00000084838	predicted pseudogene 10241 [Source:MGI Symbol;Acc:MGI:3704461]	Gm10241	4.43962	0	1.99505	7.05063	5.04679	4.30531		1.78373	0.0539374	0.0100048
	ENSMUSG00000097589	deleted in lymphocytic leukemia, 2 [Source:MGI Symbol;Acc:MGI:1934030]	Dleu2	9.1456	6.31514	7.11989	9.04027	5.65646	5.14555		-0.343333	0.0541529	0.0100517
	ENSMUSG00000032643	four and a half LIM domains 3 [Source:MGI Symbol;Acc:MGI:1341092]	Fhl3	95.6088	99.912	93.1358	74.8841	86.4772	81.4094		-0.177546	0.054366	0.0100981
	ENSMUSG00000031993	sorting nexin 19 [Source:MGI Symbol;Acc:MGI:1921581]	Snx19	21.8502	20.9809	21.7931	19.5651	18.4045	19.7577		-0.161448	0.0543955	0.0101106
	ENSMUSG00000030284	cysteine-rich with EGF-like domains 1 [Source:MGI Symbol;Acc:MGI:2152539]	Creld1	2.49814	2.44371	2.47355	1.5713	1.75429	2.00124		-0.404262	0.0544579	0.0101291
	ENSMUSG00000022610	mitogen-activated protein kinase 12 [Source:MGI Symbol;Acc:MGI:1353438]	Mapk12	0.333701	0.0600032	0.299913	0.794933	0.600619	0.44128		1.26403	0.0545112	0.010146
	ENSMUSG00000035697	Rho GTPase activating protein 45 [Source:MGI Symbol;Acc:MGI:1917969]	Arhgap45	351.858	330.869	350.076	369.928	311.342	299.768		-0.133541	0.0545278	0.0101769
	ENSMUSG00000020808	PICALM interacting mitotic regulator [Source:MGI Symbol;Acc:MGI:1924434]	Pimreg	65.6797	71.0033	71.9072	97.1762	77.4294	78.1662		0.193399	0.0545278	0.0101644
	ENSMUSG00000027775	major facilitator superfamily domain containing 1 [Source:MGI Symbol;Acc:MGI:1914118]	Mfsd1	61.0922	62.3693	63.1303	69.6852	71.5286	64.6532		0.144912	0.0545278	0.0101727
	ENSMUSG00000072980	Opa interacting protein 5 [Source:MGI Symbol;Acc:MGI:1917895]	Oip5	28.6952	26.1955	28.9281	36.6465	31.0514	32.1082		0.196949	0.0545278	0.0101601
	ENSMUSG00000050627	glycerol-3-phosphate dehydrogenase 1-like [Source:MGI Symbol;Acc:MGI:1289257]	Gpd1l	27.4195	24.7784	27.936	38.2782	30.0409	28.2656		0.162103	0.0546447	0.0102127
	ENSMUSG00000024812	tight junction protein 2 [Source:MGI Symbol;Acc:MGI:1341872]	Tjp2	12.6249	14.0508	14.7534	9.65708	11.9913	11.629		-0.269413	0.0546447	0.0102067
	ENSMUSG00000010057	NPR2 like, GATOR1 complex subunit [Source:MGI Symbol;Acc:MGI:1914482]	Nprl2	30.2768	27.1638	29.0738	25.4815	25.6936	24.7453		-0.175254	0.0548045	0.0102496
	ENSMUSG00000003948	monocyte to macrophage differentiation-associated [Source:MGI Symbol;Acc:MGI:1914718]	Mmd	52.6382	47.7855	51.1015	35.1941	42.1877	46.9508		-0.204067	0.0548199	0.0102594
	ENSMUSG00000035683	maternal embryonic leucine zipper kinase [Source:MGI Symbol;Acc:MGI:106924]	Melk	56.3557	55.2343	57.1571	74.4646	60.5052	60.7147		0.146212	0.0549766	0.0102958
	ENSMUSG00000040701	adaptor protein complex AP-1, gamma 2 subunit [Source:MGI Symbol;Acc:MGI:1328307]	Ap1g2	67.2097	63.5113	68.6499	68.4552	59.2756	60.4787		-0.12908	0.0551584	0.0103369
	ENSMUSG00000113853	predicted gene, 47583 [Source:MGI Symbol;Acc:MGI:6096621]	Gm47583	0.741449	0.733265	0.642576	0.367971	0.175594	0.522922		-1.08465	0.0551798	0.0103479
	ENSMUSG00000027998	pleiotropic regulator 1 [Source:MGI Symbol;Acc:MGI:1858197]	Plrg1	75.5051	83.2658	83.1909	90.9421	90.8949	86.5373		0.144108	0.0552594	0.0103705
	ENSMUSG00000039461	T cell leukemia translocation altered gene [Source:MGI Symbol;Acc:MGI:1918829]	Tcta	14.6957	12.4839	13.2158	10.4911	11.1251	10.9624		-0.258741	0.0552594	0.010377
	ENSMUSG00000047284	neuralized E3 ubiquitin protein ligase 4 [Source:MGI Symbol;Acc:MGI:1921092]	Neurl4	29.6367	26.0142	28.4164	27.864	23.6928	24.3302		-0.18929	0.0554474	0.0104193
	ENSMUSG00000058392	ribosomal RNA processing 1B [Source:MGI Symbol;Acc:MGI:1919712]	Rrp1b	83.8198	76.909	87.0131	83.6493	74.3547	74.1798		-0.139899	0.0555762	0.0104577
	ENSMUSG00000078851	H2A.W histone [Source:MGI Symbol;Acc:MGI:2448458]	H2aw	0.322731	0.638337	0.227899	0.234911	0.112099	0.0521612		-1.48662	0.0555762	0.0104512
	ENSMUSG00000094212	T cell receptor alpha variable 14-3 [Source:MGI Symbol;Acc:MGI:3702149]	Trav14-3	6.61319	4.45922	8.06629	7.54867	11.2764	11.0772		0.663865	0.0556929	0.0104868
	ENSMUSG00000058799	nucleosome assembly protein 1-like 1 [Source:MGI Symbol;Acc:MGI:1855693]	Nap1l1	288.159	275.538	290.695	331.176	303.86	304.837		0.116376	0.0557136	0.0104978
	ENSMUSG00000037465	Kruppel-like factor 10 [Source:MGI Symbol;Acc:MGI:1101353]	Klf10	41.9846	44.5807	42.1311	48.4336	46.4837	45.9109		0.140128	0.0558733	0.0105493
	ENSMUSG00000009406	ELK1, member of ETS oncogene family [Source:MGI Symbol;Acc:MGI:101833]	Elk1	14.1579	13.3652	13.3455	10.4459	12.0483	11.6286		-0.188557	0.0558733	0.0105438
	ENSMUSG00000074405	zinc finger protein 865 [Source:MGI Symbol;Acc:MGI:2442656]	Zfp865	11.918	10.8593	12.2309	12.603	10.6361	9.30733		-0.198333	0.0558733	0.010548
	ENSMUSG00000037487	ubiquitin protein ligase E3 component n-recognin 5 [Source:MGI Symbol;Acc:MGI:1918040]	Ubr5	71.735	66.1212	71.6329	62.6546	65.8002	61.5921		-0.125926	0.0560477	0.0105894
	ENSMUSG00000033323	CTD (carboxy-terminal domain, RNA polymerase II, polypeptide A) phosphatase, subunit 1 [Source:MGI Symbol;Acc:MGI:1926953]	Ctdp1	46.3492	48.6988	49.616	58.0834	54.2345	51.2739		0.147236	0.0560984	0.0106061
	ENSMUSG00000054626	X-linked lymphocyte-regulated [Source:MGI Symbol;Acc:MGI:98976]	Xlr	2.02856	3.42517	2.30595	1.94474	2.11383	0.191921		-1.63701	0.0561072	0.0106149
	ENSMUSG00000026307	selenocysteine lyase [Source:MGI Symbol;Acc:MGI:1355310]	Scly	38.2145	34.9821	37.8084	30.6417	33.0518	32.5553		-0.174161	0.0561174	0.010624
	ENSMUSG00000094025	predicted gene 8879 [Source:MGI Symbol;Acc:MGI:3648905]	Gm8879	11.4917	5.58096	7.31797	1.6804	3.95594	5.67152		-0.794989	0.056303	0.0106664
	ENSMUSG00000040570	RUN domain containing 3B [Source:MGI Symbol;Acc:MGI:2685286]	Rundc3b	16.9946	15.4636	16.2853	22.9056	19.1872	18.4709		0.259079	0.0563603	0.0106844
	ENSMUSG00000015961	adenylosuccinate synthetase, non muscle [Source:MGI Symbol;Acc:MGI:87948]	Adss	104.323	103.952	109.666	122.442	117.495	111.617		0.124726	0.0564099	0.010701
	ENSMUSG00000023940	shugoshin 1 [Source:MGI Symbol;Acc:MGI:1919665]	Sgo1	65.3195	59.7446	61.9577	75.8496	65.6342	68.3674		0.142042	0.0565027	0.0107258
	ENSMUSG00000047126	clathrin, heavy polypeptide (Hc) [Source:MGI Symbol;Acc:MGI:2388633]	Cltc	283.829	277.029	276.406	232.145	251.051	251.258		-0.141821	0.0565374	0.0107396
	ENSMUSG00000030651	ADP-ribosyltransferase 2b [Source:MGI Symbol;Acc:MGI:107545]	Art2b	0.775521	0.201832	0.461171	1.64891	0.85065	1.1083		1.23184	0.056587	0.0107635
	ENSMUSG00000057378	ryanodine receptor 3 [Source:MGI Symbol;Acc:MGI:99684]	Ryr3	0.310214	0.198511	0.227651	0.1129	0.126766	0.159263		-0.727536	0.056587	0.0107591
	ENSMUSG00000110057	predicted gene 2225 [Source:MGI Symbol;Acc:MGI:3780395]	Gm2225	11.0225	14.8373	10.162	18.052	16.9097	14.8459		0.541817	0.0567362	0.0107991
	ENSMUSG00000020914	topoisomerase (DNA) II alpha [Source:MGI Symbol;Acc:MGI:98790]	Top2a	486.963	463.856	522.742	652.355	536.391	540.501		0.151327	0.0567496	0.0108442
	ENSMUSG00000022346	myelocytomatosis oncogene [Source:MGI Symbol;Acc:MGI:97250]	Myc	222.576	198.481	224.046	343.579	254.996	224.453		0.210282	0.0567496	0.0108524
	ENSMUSG00000048277	synaptogyrin 2 [Source:MGI Symbol;Acc:MGI:1328324]	Syngr2	259.718	263.214	252.751	214.166	225.258	234.969		-0.152414	0.0567496	0.0108359
	ENSMUSG00000046908	leukotriene B4 receptor 1 [Source:MGI Symbol;Acc:MGI:1309472]	Ltb4r1	155.259	170.497	162.966	48.2784	136.849	124.545		-0.438162	0.0567496	0.0108149
	ENSMUSG00000020079	suppressor of var1, 3-like 1 (S. cerevisiae) [Source:MGI Symbol;Acc:MGI:2441711]	Supv3l1	44.2826	42.871	46.343	44.8682	40.5936	37.8908		-0.163996	0.0567496	0.0108281
	ENSMUSG00000039637	coronin 7 [Source:MGI Symbol;Acc:MGI:1926135]	Coro7	32.0492	28.3737	33.0638	46.2999	36.5237	32.8289		0.187841	0.0567496	0.0108494
	ENSMUSG00000055497	predicted gene 9974 [Source:MGI Symbol;Acc:MGI:3708610]	Gm9974	1.99879	0.494182	0.705732	1.27303	0	0.323053		-1.98765	0.0567496	0.010832
	ENSMUSG00000060427	zinc finger protein 868 [Source:MGI Symbol;Acc:MGI:2142546]	Zfp868	21.5858	20.7556	20.9908	23.7423	23.6573	22.8287		0.16438	0.05701	0.0109095
	ENSMUSG00000090733	ribosomal protein S27 [Source:MGI Symbol;Acc:MGI:1888676]	Rps27	967.71	1036.27	974.158	1146.72	1141.93	1084.39		0.195104	0.0571285	0.0109424
	ENSMUSG00000038963	solute carrier organic anion transporter family, member 4a1 [Source:MGI Symbol;Acc:MGI:1351866]	Slco4a1	24.4859	24.8341	25.9874	21.6659	23.7606	20.4329		-0.186633	0.0571285	0.0109467
	ENSMUSG00000022884	eukaryotic translation initiation factor 4A2 [Source:MGI Symbol;Acc:MGI:106906]	Eif4a2	169.21	143.732	149.754	143.737	138.669	128.295		-0.162223	0.0571312	0.0109901
	ENSMUSG00000068040	transmembrane 9 superfamily member 4 [Source:MGI Symbol;Acc:MGI:2139220]	Tm9sf4	53.9023	49.3563	54.6884	44.0698	49.3121	46.9521		-0.138671	0.0571312	0.0109632
	ENSMUSG00000026879	gelsolin [Source:MGI Symbol;Acc:MGI:95851]	Gsn	54.077	59.7719	54.2467	13.2537	42.253	42.0166		ENSMUSG00000106106	0.0571312	0.0109962
	ENSMUSG00000085156	small nucleolar RNA host gene 15 [Source:MGI Symbol;Acc:MGI:3650059]	Snhg15	45.1361	42.9592	43.8911	42.6278	38.7333	35.7509		-0.200674	0.0571312	0.0109762
	ENSMUSG00000073902	GTPase, very large interferon inducible, family member 3 [Source:MGI Symbol;Acc:MGI:3584360]	Gvin3	23.6463	19.1904	23.7171	44.533	25.2835	27.5355		0.311481	0.0571312	0.0109721
	ENSMUSG00000063952	bromodomain and PHD finger containing, 3 [Source:MGI Symbol;Acc:MGI:2146836]	Brpf3	15.8593	13.2043	13.9495	13.6166	12.0504	12.301		-0.183669	0.0571312	0.0109983
	ENSMUSG00000037138	AF4/FMR2 family, member 3 [Source:MGI Symbol;Acc:MGI:106927]	Aff3	1.37045	1.08083	1.93551	4.82982	2.2415	2.43929		0.658746	0.0571312	0.0109782
	ENSMUSG00000020321	malate dehydrogenase 1, NAD (soluble) [Source:MGI Symbol;Acc:MGI:97051]	Mdh1	245.734	249.196	255.529	298.694	268.488	262.394		0.110218	0.0571535	0.0110135
	ENSMUSG00000025026	adducin 3 (gamma) [Source:MGI Symbol;Acc:MGI:1351615]	Add3	41.468	36.4118	41.5992	58.1753	44.5307	42.8101		0.173763	0.0571535	0.0110357
	ENSMUSG00000040663	cardiotrophin-like cytokine factor 1 [Source:MGI Symbol;Acc:MGI:1930088]	Clcf1	23.171	19.226	17.733	16.0269	15.3592	13.5584		-0.363358	0.0571535	0.0110327
	ENSMUSG00000114575	predicted gene, 47814 [Source:MGI Symbol;Acc:MGI:6096999]	Gm47814	5.80204	4.832	7.97869	4.33437	2.22744	4.14585		-1.05167	0.0571535	0.0110391
	ENSMUSG00000031661	naked cuticle 1 [Source:MGI Symbol;Acc:MGI:2135954]	Nkd1	0.48117	0.400723	0.608032	0.221202	0.290281	0.294703		-0.848643	0.0571535	0.011032
	ENSMUSG00000031805	Janus kinase 3 [Source:MGI Symbol;Acc:MGI:99928]	Jak3	97.8525	101.017	104.053	106.556	95.2457	81.3809		-0.162815	0.0572224	0.0110597
	ENSMUSG00000025579	glucosidase, alpha, acid [Source:MGI Symbol;Acc:MGI:95609]	Gaa	27.7293	28.0915	28.8521	26.982	25.3741	25.0883		-0.145535	0.0574118	0.0111146
	ENSMUSG00000058997	von Willebrand factor A domain containing 8 [Source:MGI Symbol;Acc:MGI:1919008]	Vwa8	9.4799	9.52881	9.06764	9.05414	7.86082	8.29859		-0.163114	0.0574118	0.0111125
	ENSMUSG00000032109	NLR family member X1 [Source:MGI Symbol;Acc:MGI:2429611]	Nlrx1	3.49302	3.47431	3.57235	2.41101	2.40564	3.1148		-0.372137	0.0574118	0.0111183
	ENSMUSG00000033885	PX domain containing serine/threonine kinase [Source:MGI Symbol;Acc:MGI:1289230]	Pxk	21.3897	20.5605	20.2671	24.1646	22.6161	22.238		0.154872	0.0574131	0.0111259
	ENSMUSG00000037894	H2A.Z variant histone 1 [Source:MGI Symbol;Acc:MGI:1888388]	H2az1	353.245	402.76	419.814	521.293	458.981	438.361		0.204735	0.0575568	0.0111611
	ENSMUSG00000021453	growth arrest and DNA-damage-inducible 45 gamma [Source:MGI Symbol;Acc:MGI:1346325]	Gadd45g	473.431	580.22	550.084	331.567	474.463	448.706		-0.251602	0.0575898	0.0111775
	ENSMUSG00000032212	SAFB-like, transcription modulator [Source:MGI Symbol;Acc:MGI:1913910]	Sltm	49.7304	43.5729	47.5077	43.8803	43.6603	40.721		-0.13208	0.0575898	0.0112153
	ENSMUSG00000091649	PHD finger protein 11B [Source:MGI Symbol;Acc:MGI:3645789]	Phf11b	30.6124	23.7182	26.2298	42.4713	30.1721	30.8208		0.268039	0.0575898	0.0111982
	ENSMUSG00000028218	CBY1 interacting BAR domain containing 1 [Source:MGI Symbol;Acc:MGI:1915349]	Cibar1	20.631	18.5994	21.7574	24.3287	23.8355	22.2298		0.17338	0.0575898	0.0112189
	ENSMUSG00000082177	predicted gene 16005 [Source:MGI Symbol;Acc:MGI:3801854]	Gm16005	2.12188	1.67877	2.09774	3.24342	4.86434	3.29229		0.951675	0.0575898	0.0111919
	ENSMUSG00000056185	sorting nexin 32 [Source:MGI Symbol;Acc:MGI:2444704]	Snx32	3.37781	2.15207	3.48616	3.43976	1.9968	1.85828		-0.597335	0.0575898	0.0112156
	ENSMUSG00000025608	podocalyxin-like [Source:MGI Symbol;Acc:MGI:1351317]	Podxl	0.483763	0.499225	0.371319	6.4301	0.767104	0.815874		1.2214	0.0575898	0.0112146
	ENSMUSG00000020515	CCR4-NOT transcription complex, subunit 8 [Source:MGI Symbol;Acc:MGI:1916375]	Cnot8	72.2095	70.633	72.3898	82.5219	77.4806	75.418		0.116362	0.0576427	0.0112436
	ENSMUSG00000036966	SPRY domain containing 3 [Source:MGI Symbol;Acc:MGI:2446175]	Spryd3	66.608	64.4687	67.6157	64.4144	59.6684	60.0419		-0.127974	0.0576427	0.0112439
	ENSMUSG00000020029	nudix (nucleoside diphosphate linked moiety X)-type motif 4 [Source:MGI Symbol;Acc:MGI:1918457]	Nudt4	120.716	123.189	128.769	160.816	132.835	136.801		0.142537	0.0576929	0.0112611
	ENSMUSG00000072621	schlafen 10, pseudogene [Source:MGI Symbol;Acc:MGI:3512288]	Slfn10-ps	23.7172	19.3886	22.3984	19.5954	17.8712	19.0737		-0.225351	0.0578409	0.0112974
	ENSMUSG00000034349	structural maintenance of chromosomes 4 [Source:MGI Symbol;Acc:MGI:1917349]	Smc4	358.742	335.194	368.994	459.683	375.229	385.101		0.128355	0.0578416	0.0113049
	ENSMUSG00000022443	myosin, heavy polypeptide 9, non-muscle [Source:MGI Symbol;Acc:MGI:107717]	Myh9	523.561	507.786	549.607	515.409	467.674	463.303		-0.164558	0.057891	0.0113219
	ENSMUSG00000063556	predicted gene 10132 [Source:MGI Symbol;Acc:MGI:3704449]	Gm10132	5.67285	6.09808	4.52844	5.3859	13.3647	7.17551		0.899374	0.0579384	0.0113386
	ENSMUSG00000032740	coiled coil domain containing 88A [Source:MGI Symbol;Acc:MGI:1925177]	Ccdc88a	0.659022	0.671801	0.988024	1.77117	1.37344	0.963541		0.532684	0.057954	0.0113491
	ENSMUSG00000059474	mbt domain containing 1 [Source:MGI Symbol;Acc:MGI:2143977]	Mbtd1	11.2722	10.2031	11.2742	13.2687	12.1961	11.6642		0.147185	0.0580056	0.011374
	ENSMUSG00000008307	RIKEN cDNA 1700109H08 gene [Source:MGI Symbol;Acc:MGI:1924286]	1700109H08Rik	9.04743	6.00233	6.14934	7.32637	4.63529	4.42341		-0.453803	0.0580056	0.0113699
	ENSMUSG00000038369	nuclear receptor coactivator 6 [Source:MGI Symbol;Acc:MGI:1929915]	Ncoa6	38.5004	36.2712	39.5849	39.3973	34.9588	34.0386		-0.12342	0.0580211	0.0113844
	ENSMUSG00000021476	hyaluronic acid binding protein 4 [Source:MGI Symbol;Acc:MGI:1891713]	Habp4	10.8714	10.3681	10.1396	10.1774	8.90562	8.87237		-0.1789	0.0580388	0.0113953
	ENSMUSG00000015714	ceramide synthase 2 [Source:MGI Symbol;Acc:MGI:1924143]	Cers2	192.363	200.984	194.023	158.36	180.488	175.794		-0.131569	0.0581268	0.01142
	ENSMUSG00000028124	glutamate-cysteine ligase, modifier subunit [Source:MGI Symbol;Acc:MGI:104995]	Gclm	20.8805	19.3254	21.068	25.1018	22.2936	22.384		0.148661	0.0581676	0.0114456
	ENSMUSG00000037315	jade family PHD finger 3 [Source:MGI Symbol;Acc:MGI:2148019]	Jade3	13.7612	12.9738	12.6595	14.7829	15.0324	13.8391		0.180276	0.0581676	0.0114503
	ENSMUSG00000038895	zinc finger protein 653 [Source:MGI Symbol;Acc:MGI:2442362]	Zfp653	8.36857	7.23589	7.26312	7.376	5.9191	5.30447		-0.353029	0.0581676	0.011448
	ENSMUSG00000026275	protein phosphatase 1, regulatory subunit 7 [Source:MGI Symbol;Acc:MGI:1913635]	Ppp1r7	30.2791	29.9666	31.401	34.8969	33.1105	33.3414		0.132608	0.0582316	0.0114703
	ENSMUSG00000039783	kynurenine 3-monooxygenase (kynurenine 3-hydroxylase) [Source:MGI Symbol;Acc:MGI:2138151]	Kmo	4.76479	3.47978	4.21019	6.0027	5.52523	4.47847		0.311878	0.058259	0.0114832
	ENSMUSG00000027132	katanin p80 subunit B like 1 [Source:MGI Symbol;Acc:MGI:1919675]	Katnbl1	18.6637	15.4988	15.4533	19.5065	18.3793	17.6846		0.197408	0.058305	0.0114997
	ENSMUSG00000033955	tankyrase 1 binding protein 1 [Source:MGI Symbol;Acc:MGI:2446193]	Tnks1bp1	13.7079	12.7393	14.0569	9.92548	11.6631	11.9342		-0.220857	0.0583397	0.011514
	ENSMUSG00000023505	cell division cycle associated 3 [Source:MGI Symbol;Acc:MGI:1315198]	Cdca3	134.521	141.361	142.774	181.745	152.808	147.714		0.140446	0.0583811	198.836
	ENSMUSG00000033031	cell proliferation regulating inhibitor of protein phosphatase 2A [Source:MGI Symbol;Acc:MGI:2146335]	Cip2a	78.861	75.4016	79.2335	102.278	82.3449	86.1182		0.149303	0.0583811	0.0115445
	ENSMUSG00000032308	unc-51-like kinase 3 [Source:MGI Symbol;Acc:MGI:1918992]	Ulk3	15.772	12.7145	13.9808	11.3388	11.0531	11.2827		-0.309042	0.0583811	0.0115444
	ENSMUSG00000051220	excision repair cross-complementing rodent repair deficiency complementation group 6 like [Source:MGI Symbol;Acc:MGI:2654144]	Ercc6l	25.7987	24.9326	27.227	35.2989	28.335	29.5151		0.175723	0.058465	0.0115685
	ENSMUSG00000070713	predicted pseudogene 10282 [Source:MGI Symbol;Acc:MGI:3704312]	Gm10282	0.601721	0.991799	1.06228	2.08043	1.56753	1.94506		0.915179	0.0587204	0.0116282
	ENSMUSG00000073125	X-linked lymphocyte-regulated 3B [Source:MGI Symbol;Acc:MGI:109505]	Xlr3b	0.641279	0.8456	2.04858	0.933556	0.572771	0.444198		-1.29819	0.0587204	0.0116341
	ENSMUSG00000027901	DENN/MADD domain containing 2D [Source:MGI Symbol;Acc:MGI:2181193]	Dennd2d	74.2531	65.9539	69.1333	67.8595	62.7505	61.6897		-0.128821	0.0587534	0.0116556
	ENSMUSG00000020407	uridine phosphorylase 1 [Source:MGI Symbol;Acc:MGI:1097668]	Upp1	12.3612	12.574	10.8073	3.98463	9.13922	8.2769		-0.481115	0.0587534	0.011651
	ENSMUSG00000040212	epithelial membrane protein 3 [Source:MGI Symbol;Acc:MGI:1098729]	Emp3	308.676	309.959	304.281	384.091	332.881	321.077		0.133537	0.0587632	0.0116746
	ENSMUSG00000052142	RAS protein activator like 3 [Source:MGI Symbol;Acc:MGI:2444128]	Rasal3	185.461	174.299	180.219	185.249	162.185	160.032		-0.122461	0.0587632	0.0116801
	ENSMUSG00000079445	UDP-GlcNAc:betaGal beta-1,3-N-acetylglucosaminyltransferase 7 [Source:MGI Symbol;Acc:MGI:2384394]	B3gnt7	0.44643	0.524284	0.334954	0.792067	0.639643	0.838791		0.918486	0.0587632	0.0116651
	ENSMUSG00000097882	RIKEN cDNA 0610038B21 gene [Source:MGI Symbol;Acc:MGI:1917595]	0610038B21Rik	1.1652	0.892134	1.03516	0.861814	0.509171	0.6561		-0.737215	0.0589601	0.0117267
	ENSMUSG00000001525	tubulin, beta 5 class I [Source:MGI Symbol;Acc:MGI:107812]	Tubb5	1855.9	1905.14	1995.51	2448.89	2054.52	2055.26		0.123563	0.0590088	0.0117439
	ENSMUSG00000026946	N-myc (and STAT) interactor [Source:MGI Symbol;Acc:MGI:1928368]	Nmi	80.0108	83.1211	83.0192	94.6012	91.4888	88.7784		0.154405	0.0590828	0.0117785
	ENSMUSG00000026683	NUF2, NDC80 kinetochore complex component [Source:MGI Symbol;Acc:MGI:1914227]	Nuf2	45.6187	43.6929	47.9097	63.0051	49.5089	50.8584		0.161341	0.0590828	0.0117831
	ENSMUSG00000071632	RIKEN cDNA 2510002D24 gene [Source:MGI Symbol;Acc:MGI:1919557]	2510002D24Rik	27.5758	23.8913	24.2452	19.9307	21.8547	18.9827		-0.26376	0.0590828	0.0117743
	ENSMUSG00000031934	pannexin 1 [Source:MGI Symbol;Acc:MGI:1860055]	Panx1	19.6212	19.575	20.4929	24.9761	21.8622	21.478		0.146026	0.0590828	0.0117888
	ENSMUSG00000076855	T cell receptor alpha variable 16 [Source:MGI Symbol;Acc:MGI:3702130]	Trav16	23.3609	16.308	22.7069	28.2067	25.7747	31.1827		0.424098	0.0591354	0.0118069
	ENSMUSG00000029469	intraflagellar transport 81 [Source:MGI Symbol;Acc:MGI:1098597]	Ift81	0.0197654	0.0195473	0	0.237385	0.0411924	0.0383349		2.09038	0.0591689	0.0118211
	ENSMUSG00000021676	IQ motif containing GTPase activating protein 2 [Source:MGI Symbol;Acc:MGI:2449975]	Iqgap2	82.9727	72.475	81.9013	118.206	85.4333	88.7242		0.184955	0.0591958	0.0118477
	ENSMUSG00000027751	SPT20 SAGA complex component [Source:MGI Symbol;Acc:MGI:1929651]	Supt20	57.9177	49.4445	52.6719	49.1368	47.606	45.5898		-0.159471	0.0591958	0.0118492
	ENSMUSG00000046667	RNA binding motif protein 12 B1 [Source:MGI Symbol;Acc:MGI:1919647]	Rbm12b1	7.17279	6.21605	6.97108	5.81304	5.89466	4.66109		-0.345397	0.0591958	0.0118441
	ENSMUSG00000024269	tubulin polyglutamylase complex subunit 2 [Source:MGI Symbol;Acc:MGI:1913898]	Tpgs2	20.9597	20.745	21.4148	17.799	20.0294	17.8708		-0.14982	0.0593184	0.0118813
	ENSMUSG00000032462	phosphatidylinositol-4,5-bisphosphate 3-kinase catalytic subunit beta [Source:MGI Symbol;Acc:MGI:1922019]	Pik3cb	4.23656	4.63417	4.80482	3.36407	4.11363	3.57928		-0.274061	0.0594884	0.0119229
	ENSMUSG00000021180	ribosomal protein S6 kinase, polypeptide 5 [Source:MGI Symbol;Acc:MGI:1920336]	Rps6ka5	3.22144	3.5303	3.58647	5.26005	4.35483	3.74315		0.2642	0.0595628	0.0119454
	ENSMUSG00000030516	tight junction protein 1 [Source:MGI Symbol;Acc:MGI:98759]	Tjp1	38.792	44.8966	42.8275	22.5244	36.157	37.0021		-0.263413	0.0597444	0.0120165
	ENSMUSG00000022812	glycogen synthase kinase 3 beta [Source:MGI Symbol;Acc:MGI:1861437]	Gsk3b	36.9738	35.5438	36.1087	33.408	33.9765	32.2913		-0.106694	0.0597444	0.01202
	ENSMUSG00000043050	transition protein 2 [Source:MGI Symbol;Acc:MGI:98785]	Tnp2	29.3784	29.0541	24.4242	45.7257	33.87	30.3081		0.358006	0.0597444	0.012019
	ENSMUSG00000049807	Rho GTPase activating protein 23 [Source:MGI Symbol;Acc:MGI:3697726]	Arhgap23	1.04352	0.877197	0.712324	0.322813	0.561811	0.489107		-0.643852	0.0597444	0.0120081
	ENSMUSG00000038663	fibronectin type III and SPRY domain containing 2 [Source:MGI Symbol;Acc:MGI:2444310]	Fsd2	0.463459	0.343757	0.572732	0.253009	0.271653	0.196629		-1.00235	0.0597444	0.0119936
	ENSMUSG00000040813	testis expressed gene 264 [Source:MGI Symbol;Acc:MGI:1096570]	Tex264	52.9758	59.9776	55.9863	42.9309	50.4732	49.1919		-0.175937	0.0597558	0.0120299
	ENSMUSG00000052707	trinucleotide repeat containing 6a [Source:MGI Symbol;Acc:MGI:2385292]	Tnrc6a	49.5207	43.6194	44.5089	42.7605	39.9204	39.7765		-0.159697	0.060092	0.0121129
	ENSMUSG00000038855	inositol 1,4,5-trisphosphate 3-kinase B [Source:MGI Symbol;Acc:MGI:109235]	Itpkb	22.1858	20.1734	19.9826	29.5351	23.5667	22.4347		0.221088	0.060092	0.0121108
	ENSMUSG00000079652	family with sequence similarity 71, member F2 [Source:MGI Symbol;Acc:MGI:2141439]	Fam71f2	2.35203	3.04177	2.42747	1.38277	1.41397	1.57906		-0.730915	0.0601351	0.0121293
	ENSMUSG00000021733	solute carrier family 4, sodium bicarbonate cotransporter, member 7 [Source:MGI Symbol;Acc:MGI:2443878]	Slc4a7	12.0966	10.7014	11.6415	8.96247	10.429	10.3389		-0.151592	0.0602133	0.0121551
	ENSMUSG00000040594	RAN binding protein 17 [Source:MGI Symbol;Acc:MGI:1929706]	Ranbp17	0.0648994	0.0513465	0.0733269	0.255093	0.14878	0.138459		1.16183	0.0602133	0.0121605
	ENSMUSG00000004356	UTP20 small subunit processome component [Source:MGI Symbol;Acc:MGI:1917933]	Utp20	52.9673	51.0171	54.4825	51.0595	47.1504	47.5344		-0.143558	0.0602857	0.0121828
	ENSMUSG00000095159	tubulin, beta 4B class IVB, pseudogene 1 [Source:MGI Symbol;Acc:MGI:3642800]	Tubb4b-ps1	1.9872	2.13615	1.76935	3.30168	3.1511	2.51358		0.620143	0.0602922	0.0121918
	ENSMUSG00000033319	fem 1 homolog c [Source:MGI Symbol;Acc:MGI:2444737]	Fem1c	33.101	35.5267	33.3394	40.4106	36.6139	35.7748		0.133398	0.0603726	0.0122158
	ENSMUSG00000072762	RIKEN cDNA 4930522L14 gene [Source:MGI Symbol;Acc:MGI:1925270]	4930522L14Rik	6.5166	6.68161	5.78603	8.26598	7.43961	7.43465		0.319006	0.0603817	0.0122253
	ENSMUSG00000029480	DEAH (Asp-Glu-Ala-His) box polypeptide 37 [Source:MGI Symbol;Acc:MGI:3028576]	Dhx37	38.7141	36.6054	42.0215	41.4665	35.601	34.2676		-0.153981	0.0604798	0.0122529
	ENSMUSG00000019487	thyroid hormone receptor interactor 10 [Source:MGI Symbol;Acc:MGI:2146901]	Trip10	16.1893	18.2003	15.9179	11.6518	15.092	12.1442		-0.276064	0.0604895	0.0122626
	ENSMUSG00000022385	G two S phase expressed protein 1 [Source:MGI Symbol;Acc:MGI:1352755]	Gtse1	113.367	120.109	122.773	151.264	134.188	124.063		0.145753	0.0605011	0.0122726
	ENSMUSG00000040183	ankyrin repeat domain 6 [Source:MGI Symbol;Acc:MGI:2154278]	Ankrd6	0.126453	0.0208428	0.0446478	0.0460215	0.263535	0.102189		1.51516	0.0605278	0.0122858
	ENSMUSG00000031154	OTU domain containing 5 [Source:MGI Symbol;Acc:MGI:1859615]	Otud5	67.6598	65.7495	62.1529	87.5181	68.8845	69.2508		0.156545	0.0605316	0.0123291
	ENSMUSG00000070420	zinc finger and SCAN domain containing 25 [Source:MGI Symbol;Acc:MGI:3647079]	Zscan25	28.7378	30.789	31.1166	37.2599	36.1844	32.3389		0.195295	0.0605316	0.0123097
	ENSMUSG00000098343	microRNA 6240 [Source:MGI Symbol;Acc:MGI:5531232]	Mir6240	19.7316	14.6354	19.5071	18.3121	39.0659	42.0963		1.03447	0.0605316	0.012323
	ENSMUSG00000022386	tRNA 5-methylaminomethyl-2-thiouridylate methyltransferase [Source:MGI Symbol;Acc:MGI:1919276]	Trmu	9.96289	10.1976	10.5838	8.75297	9.47364	8.19676		-0.214787	0.0605316	0.0123007
	ENSMUSG00000030579	TYRO protein tyrosine kinase binding protein [Source:MGI Symbol;Acc:MGI:1277211]	Tyrobp	3.28812	2.56723	3.42179	1.32265	1.98366	1.34258		-0.925645	0.0605316	0.0123141
	ENSMUSG00000091475	cytoplasmic endogenous regulator of oxidative phosphorylation 1 [Source:MGI Symbol;Acc:MGI:1920084]	Cerox1	0.271728	0.107492	0.11513	1.12739	0.22652	0.474313		1.34031	0.0605316	0.0123329
	ENSMUSG00000006398	cell division cycle 20 [Source:MGI Symbol;Acc:MGI:1859866]	Cdc20	235.927	252.94	260.725	339.161	282.547	267.381		0.166436	0.0605335	65.9791
	ENSMUSG00000114822	predicted gene 4813 [Source:MGI Symbol;Acc:MGI:3648783]	Gm4813	4.18958	1.57161	3.36658	0.946408	1.95703	1.12078		-1.00241	0.0605335	0.0123459
	ENSMUSG00000021548	cyclin H [Source:MGI Symbol;Acc:MGI:1913921]	Ccnh	42.4545	43.1991	44.9169	51.4673	47.7254	46.794		0.132749	0.0607239	0.0123954
	ENSMUSG00000035139	SECIS binding protein 2 [Source:MGI Symbol;Acc:MGI:1922670]	Secisbp2	37.9527	34.8193	38.7473	37.0516	34.2177	32.7877		-0.13625	0.0607642	0.0124145
	ENSMUSG00000041420	Meis homeobox 3 [Source:MGI Symbol;Acc:MGI:108519]	Meis3	3.63789	2.59037	2.36341	5.04438	3.63916	3.42199		0.498588	0.0607642	0.0124191
	ENSMUSG00000028708	MAP kinase-interacting serine/threonine kinase 1 [Source:MGI Symbol;Acc:MGI:894316]	Mknk1	24.8449	22.2379	25.6558	23.5431	21.3205	21.756		-0.167798	0.0610348	0.0124822
	ENSMUSG00000021203	OTU domain, ubiquitin aldehyde binding 2 [Source:MGI Symbol;Acc:MGI:1915399]	Otub2	2.74908	2.74963	2.62515	1.80774	2.08337	1.96914		-0.392525	0.0611139	0.012514
	ENSMUSG00000102411	predicted gene, 36936 [Source:MGI Symbol;Acc:MGI:5610164]	Gm36936	1.17572	0.91358	0.800591	0.87107	0.481303	0.325756		-0.98369	0.0611139	0.0125218
	ENSMUSG00000039154	src homology 2 domain-containing transforming protein D [Source:MGI Symbol;Acc:MGI:1099461]	Shd	0.493291	0.354797	0.475012	0.146888	0.233648	0.173952		-1.07527	0.0611139	0.0125216
	ENSMUSG00000037815	catenin (cadherin associated protein), alpha 1 [Source:MGI Symbol;Acc:MGI:88274]	Ctnna1	110.022	114.44	115.436	81.1104	101.786	97.1116		-0.207097	0.0611621	0.0125395
	ENSMUSG00000020456	oxoglutarate (alpha-ketoglutarate) dehydrogenase (lipoamide) [Source:MGI Symbol;Acc:MGI:1098267]	Ogdh	137.052	131.941	139.016	124.644	123.633	124.761		-0.122683	0.061169	0.0125487
	ENSMUSG00000009035	transmembrane protein 184b [Source:MGI Symbol;Acc:MGI:2445179]	Tmem184b	44.9004	42.0984	46.9795	31.8962	40.3157	39.0664		-0.205331	0.0612049	0.0125866
	ENSMUSG00000032059	asparagine-linked glycosylation 9 (alpha 1,2 mannosyltransferase) [Source:MGI Symbol;Acc:MGI:1924753]	Alg9	28.8798	30.0287	29.8465	25.1477	25.9492	25.9625		-0.179954	0.0612049	0.012585
	ENSMUSG00000073647	predicted gene 10557 [Source:MGI Symbol;Acc:MGI:3708638]	Gm10557	28.9042	24.3434	28.1802	25.4503	23.318	19.3495		-0.321467	0.0612049	0.012598
	ENSMUSG00000025545	citrate lyase beta like [Source:MGI Symbol;Acc:MGI:1916884]	Clybl	16.7869	15.653	14.9589	18.7649	18.8253	17.8295		0.26971	0.0612049	0.0125725
	ENSMUSG00000070047	FAT atypical cadherin 1 [Source:MGI Symbol;Acc:MGI:109168]	Fat1	1.16499	1.18859	1.30169	0.539381	0.975778	0.95814		-0.430236	0.0612049	0.0125977
	ENSMUSG00000042523	dynein, axonemal, light chain 1 [Source:MGI Symbol;Acc:MGI:1921462]	Dnal1	1.18125	1.21758	1.01038	0.853763	0.693468	0.790568		-0.505347	0.0612049	0.0126029
	ENSMUSG00000030059	TATA element modulatory factor 1 [Source:MGI Symbol;Acc:MGI:2684999]	Tmf1	43.3367	47.3592	46.686	40.1264	41.8217	41.4592		-0.134193	0.0616924	0.0127148
	ENSMUSG00000025163	CD7 antigen [Source:MGI Symbol;Acc:MGI:88344]	Cd7	1.12068	0.9068	1.22304	6.00673	2.76022	2.17355		1.24153	0.0616924	32.4769
	ENSMUSG00000024913	low density lipoprotein receptor-related protein 5 [Source:MGI Symbol;Acc:MGI:1278315]	Lrp5	8.36863	9.47197	8.43747	6.43222	7.60872	7.2993		-0.213681	0.0617691	0.0127506
	ENSMUSG00000110159	predicted gene 45501 [Source:MGI Symbol;Acc:MGI:5791337]	Gm45501	1.05103	0.271154	0.516307	0.399145	0.0476176	0.354514		-1.60855	0.0617691	0.0127471
	ENSMUSG00000018547	phosphatidylinositol-5-phosphate 4-kinase, type II, beta [Source:MGI Symbol;Acc:MGI:1934234]	Pip4k2b	124.125	121.943	126.513	116.779	113.672	112.949		-0.118732	0.0618223	0.0127774
	ENSMUSG00000034928	ring finger protein 44 [Source:MGI Symbol;Acc:MGI:2145310]	Rnf44	76.7315	74.6557	75.73	78.9807	69.2511	64.5332		-0.136703	0.0618223	0.0127731
	ENSMUSG00000030654	ADP-ribosylation factor-like 6 interacting protein 1 [Source:MGI Symbol;Acc:MGI:1858943]	Arl6ip1	514.925	512.092	546.413	675.139	561.623	574.934		0.138601	0.0619202	0.0128201
	ENSMUSG00000017707	serine incorporator 3 [Source:MGI Symbol;Acc:MGI:1349457]	Serinc3	397.332	400.26	423.947	471.103	446.891	440.318		0.132161	0.0619202	0.0128063
	ENSMUSG00000042524	Sad1 and UNC84 domain containing 2 [Source:MGI Symbol;Acc:MGI:2443011]	Sun2	84.7624	89.8505	91.8138	144.493	95.7373	99.443		0.191371	0.0619202	0.012824
	ENSMUSG00000020783	nuclear cap binding subunit 3 [Source:MGI Symbol;Acc:MGI:1914124]	Ncbp3	18.0309	17.1565	19.0163	21.7701	19.626	19.2061		0.115248	0.0619202	0.0128293
	ENSMUSG00000027523	GNAS (guanine nucleotide binding protein, alpha stimulating) complex locus [Source:MGI Symbol;Acc:MGI:95777]	Gnas	183.845	186.868	189.839	226.084	200.477	191.632		0.100228	0.0619844	0.0128505
	ENSMUSG00000027387	zinc finger CCCH type containing 8 [Source:MGI Symbol;Acc:MGI:1930128]	Zc3h8	31.132	31.9131	33.177	33.758	26.8116	28.1223		-0.196657	0.0620081	0.012868
	ENSMUSG00000100392	predicted gene 28935 [Source:MGI Symbol;Acc:MGI:5579641]	Gm28935	4.87733	4.22056	5.16625	7.98782	7.83527	6.30636		0.558508	0.0620081	0.0128712
	ENSMUSG00000046794	protein phosphatase 1, regulatory subunit 3B [Source:MGI Symbol;Acc:MGI:2177268]	Ppp1r3b	72.2367	73.4962	70.3002	40.3677	62.792	59.5706		-0.26415	0.0620978	0.0128982
	ENSMUSG00000074403	H3 clustered histone 13 [Source:MGI Symbol;Acc:MGI:2448351]	H3c13	0.946149	1.40356	0.334066	1.03303	1.72536	2.75257		1.69174	0.0620978	0.0129057
	ENSMUSG00000018169	MFNG O-fucosylpeptide 3-beta-N-acetylglucosaminyltransferase [Source:MGI Symbol;Acc:MGI:1095404]	Mfng	158.528	153.682	156.191	152.71	140.873	140.957		-0.119304	0.0623136	0.0130023
	ENSMUSG00000018209	serine/threonine kinase 4 [Source:MGI Symbol;Acc:MGI:1929004]	Stk4	133.887	129.838	137.583	166.248	141.67	147.047		0.133593	0.0623136	0.0130142
	ENSMUSG00000050106	transmembrane channel-like gene family 8 [Source:MGI Symbol;Acc:MGI:2669037]	Tmc8	55.9776	49.4576	53.0522	53.571	44.4366	46.7385		-0.173606	0.0623136	0.0130032
	ENSMUSG00000026821	ral guanine nucleotide dissociation stimulator [Source:MGI Symbol;Acc:MGI:107485]	Ralgds	16.5004	15.1668	13.6303	18.6115	18.0281	16.1953		0.269501	0.0623136	0.0129811
	ENSMUSG00000093579	predicted gene, 20036 [Source:MGI Symbol;Acc:MGI:5012221]	Gm20036	3.41914	2.70512	4.05628	0.895948	1.71017	2.51993		-0.871387	0.0623136	0.0129602
	ENSMUSG00000029470	purinergic receptor P2X, ligand-gated ion channel 4 [Source:MGI Symbol;Acc:MGI:1338859]	P2rx4	0.772273	0.747498	0.997869	1.39934	1.30127	1.1632		0.496861	0.0623136	0.0129999
	ENSMUSG00000022425	ectonucleotide pyrophosphatase/phosphodiesterase 2 [Source:MGI Symbol;Acc:MGI:1321390]	Enpp2	0.219715	0.0790144	0.098734	0.850523	0.249764	0.213068		1.21345	0.0623136	0.0129829
	ENSMUSG00000042807	HECT, C2 and WW domain containing E3 ubiquitin protein ligase 2 [Source:MGI Symbol;Acc:MGI:2685817]	Hecw2	0.187227	0.185161	0.201466	0.155749	0.111484	0.121042		-0.664188	0.0623136	0.0130066
	ENSMUSG00000101841	predicted gene 11993 [Source:MGI Symbol;Acc:MGI:3651126]	Gm11993	1.40768	1.80979	1.68988	1.07587	0.733426	0.955568		-0.868346	0.0623466	0.013029
	ENSMUSG00000022555	diacylglycerol O-acyltransferase 1 [Source:MGI Symbol;Acc:MGI:1333825]	Dgat1	21.3788	17.3699	18.4309	14.4753	15.8224	15.8237		-0.237818	0.0624887	0.0130713
	ENSMUSG00000038206	F-box protein 8 [Source:MGI Symbol;Acc:MGI:1354696]	Fbxo8	11.5725	13.4669	13.0098	15.1669	15.0023	13.6141		0.187349	0.0624887	0.0130747
	ENSMUSG00000075600	zinc finger CCCH type containing 3 [Source:MGI Symbol;Acc:MGI:2663721]	Zc3h3	4.14483	4.4244	4.32067	4.34586	3.32498	3.28572		-0.322814	0.0625949	0.0131049
	ENSMUSG00000082575	eukaryotic translation elongation factor 2, pseudogene 2 [Source:MGI Symbol;Acc:MGI:3650664]	Eef2-ps2	25.7465	34.7985	26.4838	39.1677	47.8445	30.294		0.481856	0.0626025	0.01313
	ENSMUSG00000097772	RIKEN cDNA 5430416N02 gene [Source:MGI Symbol;Acc:MGI:1918676]	5430416N02Rik	14.007	12.2821	12.5141	10.7424	12.3207	8.77136		-0.262896	0.0626025	0.01312
	ENSMUSG00000044197	G protein-coupled receptor 146 [Source:MGI Symbol;Acc:MGI:1933113]	Gpr146	8.36894	8.3775	7.06293	13.5019	9.62468	8.37968		0.324617	0.0626025	0.0131305
	ENSMUSG00000063739	predicted gene 4963 [Source:MGI Symbol;Acc:MGI:3645168]	Gm4963	1.52685	2.718	2.58768	3.33413	4.13668	5.03425		0.897667	0.0626025	0.0131385
	ENSMUSG00000029502	golgi autoantigen, golgin subfamily a, 3 [Source:MGI Symbol;Acc:MGI:96958]	Golga3	25.0246	25.361	26.3751	23.4734	23.5893	23.0661		-0.128653	0.0627905	0.0131939
	ENSMUSG00000074604	microsomal glutathione S-transferase 2 [Source:MGI Symbol;Acc:MGI:2448481]	Mgst2	18.3915	13.7801	13.9119	27.8743	19.5868	15.0843		0.319896	0.0627905	0.0131877
	ENSMUSG00000006463	zinc finger, DHHC domain containing 24 [Source:MGI Symbol;Acc:MGI:1917855]	Zdhhc24	13.3006	9.47385	11.992	11.8855	9.07477	9.09784		-0.302169	0.0628236	0.0132169
	ENSMUSG00000026480	neutrophil cytosolic factor 2 [Source:MGI Symbol;Acc:MGI:97284]	Ncf2	0.326766	0.309694	0.336509	0.386504	0.624252	0.409304		0.606743	0.0628236	0.0132132
	ENSMUSG00000001473	tubulin, beta 6 class V [Source:MGI Symbol;Acc:MGI:1915201]	Tubb6	212.482	253.467	229.451	114.808	190.516	181.434		-0.362275	0.0628293	0.0132495
	ENSMUSG00000061887	single-stranded DNA binding protein 3 [Source:MGI Symbol;Acc:MGI:1919725]	Ssbp3	78.5493	73.2943	78.3912	73.9866	68.9492	67.8736		-0.145431	0.0628293	0.0132579
	ENSMUSG00000054434	transmembrane protein 120B [Source:MGI Symbol;Acc:MGI:3603158]	Tmem120b	8.62084	8.60573	8.28839	2.91654	5.82009	6.94706		-0.495466	0.0628293	0.0132385
	ENSMUSG00000069862	ribosomal protein S12, pseudogene 9 [Source:MGI Symbol;Acc:MGI:3704324]	Rps12-ps9	5.49667	3.43326	4.90298	5.68556	9.04376	6.17202		0.66468	0.0628293	0.0132328
	ENSMUSG00000106208	predicted gene 4734 [Source:MGI Symbol;Acc:MGI:3782914]	Gm4734	4.3082	4.55449	4.72077	6.48803	8.82377	5.18631		0.576864	0.0628293	0.0132582
	ENSMUSG00000022505	epithelial membrane protein 2 [Source:MGI Symbol;Acc:MGI:1098726]	Emp2	0.440675	0.277334	0.490355	0.0729003	0.320047	0.207197		-0.846914	0.0628379	0.0132681
	ENSMUSG00000024442	DAP3 binding cell death enhancer 1 [Source:MGI Symbol;Acc:MGI:1914089]	Dele1	18.5007	18.0181	18.7187	20.6777	15.9213	16.3486		-0.146915	0.0628392	0.0132764
	ENSMUSG00000033386	ferric-chelate reductase 1 [Source:MGI Symbol;Acc:MGI:108076]	Frrs1	20.5103	19.1518	19.884	14.9986	18.1251	16.9757		-0.180243	0.0628417	0.0132849
	ENSMUSG00000034343	ubiquitin-conjugating enzyme E2F (putative) [Source:MGI Symbol;Acc:MGI:1915171]	Ube2f	15.9137	16.4094	16.142	12.7997	14.2156	14.698		-0.160037	0.0628814	0.0133014
	ENSMUSG00000024754	cell migration inducing hyaluronidase 2 [Source:MGI Symbol;Acc:MGI:1890373]	Cemip2	33.6129	28.9142	32.3752	25.4871	24.494	28.6545		-0.255178	0.0629638	0.0133346
	ENSMUSG00000063077	kinesin family member 1B [Source:MGI Symbol;Acc:MGI:108426]	Kif1b	7.18157	5.6921	6.58174	5.88079	5.70037	5.46836		-0.190781	0.0629638	0.0133349
	ENSMUSG00000034227	forkhead box J1 [Source:MGI Symbol;Acc:MGI:1347474]	Foxj1	0.308048	0.435212	0.155379	0.960961	0.458566	0.426755		1.06706	0.0630968	0.0133711
	ENSMUSG00000028691	peroxiredoxin 1 [Source:MGI Symbol;Acc:MGI:99523]	Prdx1	410.17	436.441	425.159	471.525	472.076	474.495		0.173244	0.0632894	0.01342
	ENSMUSG00000035773	KISS1 receptor [Source:MGI Symbol;Acc:MGI:2148793]	Kiss1r	0.209546	0.118419	0.190251	0.196105	0	0.116118		-1.89171	0.0633029	0.0134309
	ENSMUSG00000000628	hexokinase 2 [Source:MGI Symbol;Acc:MGI:1315197]	Hk2	98.6445	117.465	109.507	68.2407	99.9696	87.465		-0.241789	0.0633475	0.0134485
	ENSMUSG00000028300	C9orf72, member of C9orf72-SMCR8 complex [Source:MGI Symbol;Acc:MGI:1920455]	C9orf72	13.0903	10.1433	12.0949	6.24263	9.3811	10.5056		-0.301645	0.0633919	0.0134741
	ENSMUSG00000079501	predicted gene 5138 [Source:MGI Symbol;Acc:MGI:3779464]	Gm5138	1.152	1.70892	1.46429	1.88668	2.40084	2.23429		0.663627	0.0633919	0.0134682
	ENSMUSG00000052889	protein kinase C, beta [Source:MGI Symbol;Acc:MGI:97596]	Prkcb	9.51986	7.311	10.1211	14.5451	10.8475	10.534		0.25825	0.0634361	0.013498
	ENSMUSG00000029059	peroxiredoxin like 2B [Source:MGI Symbol;Acc:MGI:1913719]	Prxl2b	0.899164	0.778084	0.714321	0.7363	1.87392	1.30794		0.933482	0.0634361	0.0134997
	ENSMUSG00000089417	predicted gene, 22009 [Source:MGI Symbol;Acc:MGI:5451786]	Gm22009	2.69225	0.665633	0	1.83717	1.4027	2.28445		2.32639	0.063478	0.0135167
	ENSMUSG00000020611	guanine nucleotide binding protein, alpha 13 [Source:MGI Symbol;Acc:MGI:95768]	Gna13	118.199	110.263	118.111	144.009	123.935	118.737		0.104504	0.0635806	0.0135466
	ENSMUSG00000070034	Sp110 nuclear body protein [Source:MGI Symbol;Acc:MGI:1923364]	Sp110	53.0594	48.2987	51.2801	66.537	54.0302	53.1049		0.120515	0.0636419	0.0135678
	ENSMUSG00000038518	jumonji, AT rich interactive domain 2 [Source:MGI Symbol;Acc:MGI:104813]	Jarid2	54.0615	52.8185	58.5561	54.3427	50.6014	50.5593		-0.122954	0.0636913	0.0135938
	ENSMUSG00000059288	chromodomain protein, Y chromosome-like [Source:MGI Symbol;Acc:MGI:1339956]	Cdyl	25.3883	23.3666	25.389	21.8946	23.0047	21.4089		-0.149906	0.0636913	0.0136109
	ENSMUSG00000075327	zinc finger and BTB domain containing 2 [Source:MGI Symbol;Acc:MGI:2685949]	Zbtb2	10.6445	11.6881	11.463	14.6642	12.6089	12.3414		0.178514	0.0636913	0.0135947
	ENSMUSG00000020241	collagen, type VI, alpha 2 [Source:MGI Symbol;Acc:MGI:88460]	Col6a2	0.790238	0.658118	1.05733	1.93753	1.32908	1.15622		0.534033	0.0636913	0.0136056
	ENSMUSG00000084862	predicted gene 16278 [Source:MGI Symbol;Acc:MGI:3826602]	Gm16278	0.836046	1.37803	0.865893	1.52137	1.56814	1.40531		0.662509	0.0636961	0.0136201
	ENSMUSG00000026395	protein tyrosine phosphatase, receptor type, C [Source:MGI Symbol;Acc:MGI:97810]	Ptprc	401.374	375.269	404.827	466.696	414.777	419.213		0.104496	0.0636963	0.0136334
	ENSMUSG00000038342	MLX interacting protein [Source:MGI Symbol;Acc:MGI:2141183]	Mlxip	42.5758	40.6662	38.8763	41.4903	37.0554	34.0815		-0.132112	0.0636963	0.0136363
	ENSMUSG00000036599	carbohydrate sulfotransferase 12 [Source:MGI Symbol;Acc:MGI:1929064]	Chst12	54.8318	49.9735	57.7348	49.8357	46.3916	47.2016		-0.215311	0.0637719	0.0136607
	ENSMUSG00000026355	minichromosome maintenance complex component 6 [Source:MGI Symbol;Acc:MGI:1298227]	Mcm6	347.701	353.649	383.138	467.089	390.775	386.577		0.123017	0.0638447	0.0136847
	ENSMUSG00000043801	ornithine decarboxylase antizyme 1, pseudogene [Source:MGI Symbol;Acc:MGI:108188]	Oaz1-ps	17.3567	21.1647	21.1812	22.6302	26.6903	25.1656		0.347848	0.0638447	0.0137089
	ENSMUSG00000021022	protein phosphatase 2, regulatory subunit B'', gamma [Source:MGI Symbol;Acc:MGI:1930009]	Ppp2r3c	12.3362	12.7011	12.3858	10.6603	10.9052	10.9235		-0.173833	0.0638447	0.0137086
	ENSMUSG00000117515	predicted gene 6883 [Source:MGI Symbol;Acc:MGI:3644521]	Gm6883	7.5924	7.50859	9.17805	7.30609	6.43649	5.61562		-0.442853	0.0638447	0.0137016
	ENSMUSG00000069011	predicted gene 10254 [Source:MGI Symbol;Acc:MGI:3708673]	Gm10254	7.18942	6.84673	5.07687	7.70426	7.35288	8.90856		0.492681	0.0638642	0.0137212
	ENSMUSG00000021731	mitochondrial ribosomal protein S30 [Source:MGI Symbol;Acc:MGI:1926237]	Mrps30	20.641	22.3654	21.9493	25.1266	24.3234	23.0559		0.149304	0.0638993	0.0137369
	ENSMUSG00000023795	phosphatidylserine decarboxylase, pseudogene 2 [Source:MGI Symbol;Acc:MGI:3612472]	Pisd-ps2	1.80702	2.11199	1.62405	1.7936	1.36943	0.584116		-0.809082	0.0640318	0.0137736
	ENSMUSG00000042029	non-SMC condensin II complex, subunit G2 [Source:MGI Symbol;Acc:MGI:1923294]	Ncapg2	70.1477	65.9851	73.1714	92.9723	74.7421	77.8238		0.152724	0.0640549	0.0137867
	ENSMUSG00000035093	SECIS binding protein 2-like [Source:MGI Symbol;Acc:MGI:1917604]	Secisbp2l	47.3822	45.3736	48.1518	37.7845	42.8492	43.0216		-0.140757	0.0642125	0.0138288
	ENSMUSG00000037544	DLG associated protein 5 [Source:MGI Symbol;Acc:MGI:2183453]	Dlgap5	61.0313	63.5952	61.4365	75.9699	65.5939	66.3239		0.129187	0.0642204	0.0138419
	ENSMUSG00000028681	patched 2 [Source:MGI Symbol;Acc:MGI:1095405]	Ptch2	1.17865	0.535047	0.955112	1.72991	1.51007	1.0493		0.579842	0.0642204	0.0138469
	ENSMUSG00000091575	RIKEN cDNA 2010016I18 gene [Source:MGI Symbol;Acc:MGI:1916456]	2010016I18Rik	24.1663	14.7288	16.9991	18.4085	11.7126	11.0818		-0.547536	0.0644135	0.0138968
	ENSMUSG00000037960	caspase recruitment domain family, member 19 [Source:MGI Symbol;Acc:MGI:1915730]	Card19	50.9549	57.735	60.2096	51.6237	47.559	49.9439		-0.218185	0.0644546	0.0139139
	ENSMUSG00000026411	transmembrane protein 9 [Source:MGI Symbol;Acc:MGI:1913491]	Tmem9	9.52743	9.29664	9.59844	12.2054	12.3547	9.77301		0.244896	0.0645737	0.0139478
	ENSMUSG00000061028	CLK4-associating serine/arginine rich protein [Source:MGI Symbol;Acc:MGI:1855695]	Clasrp	17.9952	16.5222	17.889	17.6283	15.4183	14.8045		-0.179646	0.0646099	0.0139639
	ENSMUSG00000003549	excision repair cross-complementing rodent repair deficiency, complementation group 1 [Source:MGI Symbol;Acc:MGI:95412]	Ercc1	30.722	33.4652	31.5463	32.2063	27.8377	27.7056		-0.15571	0.0648592	0.0140261
	ENSMUSG00000024789	Janus kinase 2 [Source:MGI Symbol;Acc:MGI:96629]	Jak2	91.1508	84.4482	91.6402	76.1943	78.6735	81.0271		-0.159271	0.065011	0.0140672
	ENSMUSG00000050914	ankyrin repeat domain 37 [Source:MGI Symbol;Acc:MGI:3603344]	Ankrd37	7.27532	6.23074	6.6735	6.46938	4.45489	5.23686		-0.410203	0.0650635	0.0140952
	ENSMUSG00000105954	predicted gene 42793 [Source:MGI Symbol;Acc:MGI:5662930]	Gm42793	4.60983	2.73537	1.82295	0.503315	1.44108	0.98348		-1.05069	0.0650635	0.0140878
	ENSMUSG00000020840	bleomycin hydrolase [Source:MGI Symbol;Acc:MGI:1345186]	Blmh	64.4849	65.6528	67.3432	71.7115	69.9109	72.8138		0.122357	0.0650665	0.0141041
	ENSMUSG00000022565	plectin [Source:MGI Symbol;Acc:MGI:1277961]	Plec	85.1977	80.4947	92.821	91.5045	77.6822	74.0361		-0.169259	0.065101	0.0141199
	ENSMUSG00000066363	serine (or cysteine) peptidase inhibitor, clade A, member 3F [Source:MGI Symbol;Acc:MGI:2182838]	Serpina3f	28.7315	28.4144	34.0642	48.5408	37.8704	38.5673		0.321822	0.0651608	0.0141466
	ENSMUSG00000086836	predicted gene 13748 [Source:MGI Symbol;Acc:MGI:3702115]	Gm13748	5.1913	5.134	5.60665	0.333413	1.90924	4.14585		-1.14351	0.0651608	0.0141495
	ENSMUSG00000030942	THUMP domain containing 1 [Source:MGI Symbol;Acc:MGI:2444479]	Thumpd1	154.317	152.309	158.628	175.368	169.452	164.181		0.120184	0.0652712	0.0141835
	ENSMUSG00000021816	protein phosphatase 3, catalytic subunit, beta isoform [Source:MGI Symbol;Acc:MGI:107163]	Ppp3cb	66.6976	63.1752	68.3631	78.5595	70.7163	69.6229		0.106096	0.0652712	0.0142152
	ENSMUSG00000014504	signal recognition particle 19 [Source:MGI Symbol;Acc:MGI:1913634]	Srp19	70.1485	69.8144	73.6078	60.6194	65.2107	65.1275		-0.135644	0.0652712	0.0142141
	ENSMUSG00000037855	zinc finger protein 365 [Source:MGI Symbol;Acc:MGI:2143676]	Zfp365	2.17332	2.23706	2.41169	4.3826	3.16592	2.73124		0.414104	0.0652712	0.0142091
	ENSMUSG00000041598	CDC42 effector protein (Rho GTPase binding) 4 [Source:MGI Symbol;Acc:MGI:1929760]	Cdc42ep4	0.126742	0.0940072	0.179	0.484332	0.429225	0.215088		1.10553	0.0652712	260.823
	ENSMUSG00000028345	testis expressed gene 10 [Source:MGI Symbol;Acc:MGI:1344413]	Tex10	47.3364	45.9542	47.3782	56.2274	50.7534	50.5279		0.138614	0.0652942	0.0142285
	ENSMUSG00000108955	predicted gene 44775 [Source:MGI Symbol;Acc:MGI:5753351]	Gm44775	0.079279	0.313615	0.111967	0.605914	0.330445	0.384402		1.3398	0.0653055	0.0142393
	ENSMUSG00000064341	mitochondrially encoded NADH dehydrogenase 1 [Source:MGI Symbol;Acc:MGI:101787]	mt-Nd1	9621.11	7786.11	8456.98	8287.03	7629.8	7237.37		-0.165596	0.0653648	0.0143153
	ENSMUSG00000045962	WNK lysine deficient protein kinase 1 [Source:MGI Symbol;Acc:MGI:2442092]	Wnk1	152.702	140.723	152.3	133.948	135.006	136.748		-0.123225	0.0653648	0.0142954
	ENSMUSG00000059775	ribosomal protein S26, pseudogene 1 [Source:MGI Symbol;Acc:MGI:3704322]	Rps26-ps1	50.3882	53.3915	42.1176	65.1202	64.829	51.6061		0.376403	0.0653648	0.0143162
	ENSMUSG00000063696	predicted pseudogene 8730 [Source:MGI Symbol;Acc:MGI:3644565]	Gm8730	22.6262	20.7012	20.3353	31.7057	25.8467	24.1711		0.315288	0.0653648	0.0143263
	ENSMUSG00000100078	predicted gene 6170 [Source:MGI Symbol;Acc:MGI:3643368]	Gm6170	7.98364	7.73103	8.33912	10.8052	10.4857	9.91957		0.352684	0.0653648	0.0142721
	ENSMUSG00000004462	TBCC domain containing 1 [Source:MGI Symbol;Acc:MGI:1917823]	Tbccd1	8.99953	8.3902	8.44605	8.51824	6.70833	7.79162		-0.202244	0.0653648	0.0143273
	ENSMUSG00000085017	predicted gene 13412 [Source:MGI Symbol;Acc:MGI:3650612]	Gm13412	11.5942	7.58792	9.63214	2.79239	6.04075	6.44842		-0.689444	0.0653648	0.0142646
	ENSMUSG00000027709	methylcrotonoyl-Coenzyme A carboxylase 1 (alpha) [Source:MGI Symbol;Acc:MGI:1919289]	Mccc1	4.6269	4.57583	4.27953	3.62486	4.01965	3.54661		-0.206925	0.0653648	0.0143026
	ENSMUSG00000107257	predicted gene 43028 [Source:MGI Symbol;Acc:MGI:5663165]	Gm43028	1.43988	1.18665	0.847318	3.1442	2.2506	1.86175		1.04122	0.0653648	0.0143119
	ENSMUSG00000023919	centromere protein Q [Source:MGI Symbol;Acc:MGI:1933744]	Cenpq	44.5497	51.4667	44.4497	52.5609	52.5194	50.0368		0.18113	0.065576	0.014382
	ENSMUSG00000029328	heterogeneous nuclear ribonucleoprotein D-like [Source:MGI Symbol;Acc:MGI:1355299]	Hnrnpdl	259.73	248.523	254.213	290.146	269.224	267.624		0.107398	0.0655846	0.0144592
	ENSMUSG00000028759	heterochromatin protein 1, binding protein 3 [Source:MGI Symbol;Acc:MGI:109369]	Hp1bp3	128.352	123.131	126.709	168.219	133.162	130.8		0.11598	0.0655846	0.0144069
	ENSMUSG00000029062	cyclin-dependent kinase 11B [Source:MGI Symbol;Acc:MGI:88353]	Cdk11b	116.599	112.483	113.491	112.829	105.535	101.138		-0.110374	0.0655846	0.263195
	ENSMUSG00000014074	ring finger protein 168 [Source:MGI Symbol;Acc:MGI:1917488]	Rnf168	36.6572	35.5362	38.7465	44.4579	39.5728	40.6409		0.125725	0.0655846	0.0143979
	ENSMUSG00000020657	DnaJ heat shock protein family (Hsp40) member C27 [Source:MGI Symbol;Acc:MGI:2443036]	Dnajc27	5.21795	4.28534	5.78338	10.6759	6.26468	6.35811		0.335244	0.0655846	0.0144557
	ENSMUSG00000071497	nuclear transport factor 2, pseudogene 1 [Source:MGI Symbol;Acc:MGI:108008]	Nutf2-ps1	3.20283	3.42088	3.25686	3.7767	4.80594	4.9695		0.553953	0.0655846	0.0144159
	ENSMUSG00000025584	phosphodiesterase 8A [Source:MGI Symbol;Acc:MGI:1277116]	Pde8a	3.05341	2.68104	3.04285	1.15281	2.46808	2.18618		-0.424451	0.0655846	0.0144475
	ENSMUSG00000031292	cyclin-dependent kinase-like 5 [Source:MGI Symbol;Acc:MGI:1278336]	Cdkl5	0.459111	0.334558	0.352644	0.677155	0.612698	0.406167		0.510651	0.0655846	22.7973
	ENSMUSG00000039238	zinc finger protein 750 [Source:MGI Symbol;Acc:MGI:2442210]	Zfp750	0.214289	0.176603	0.353084	0.467933	0.855967	0.48488		1.1745	0.0655846	0.0144566
	ENSMUSG00000106926	ribosomal protein L7, pseudogene 7 [Source:MGI Symbol;Acc:MGI:3644615]	Rpl7-ps7	9.67937	8.00092	6.4271	11.6724	10.2368	9.10634		0.453856	0.0656579	0.014485
	ENSMUSG00000028035	DnaJ heat shock protein family (Hsp40) member B4 [Source:MGI Symbol;Acc:MGI:1914285]	Dnajb4	4.66198	4.06351	3.90588	3.14895	2.97789	3.65251		-0.296996	0.0656579	0.0144921
	ENSMUSG00000057836	X-linked lymphocyte-regulated 3A [Source:MGI Symbol;Acc:MGI:109506]	Xlr3a	0.456584	0.36688	0.604539	0.062314	0.14868	0.193712		-1.62343	0.0658058	0.0145332
	ENSMUSG00000044211	predicted gene 7887 [Source:MGI Symbol;Acc:MGI:3648251]	Gm7887	7.09347	5.31453	8.04495	8.68363	3.80781	4.37746		-0.681048	0.0659994	0.0145844
	ENSMUSG00000063383	zinc finger protein 947 [Source:MGI Symbol;Acc:MGI:3646759]	Zfp947	0.562682	0.516723	0.652777	0.833764	1.38207	0.740537		0.741943	0.0659994	0.0145928
	ENSMUSG00000039057	myosin XVI [Source:MGI Symbol;Acc:MGI:2685951]	Myo16	1.21121	1.09682	1.09232	0.764784	0.86676	0.849087		-0.370891	0.0660222	0.0146063
	ENSMUSG00000097343	RIKEN cDNA 9030407P20 gene [Source:MGI Symbol;Acc:MGI:1918818]	9030407P20Rik	2.31053	1.76137	2.34542	2.15481	1.70542	1.16699		-0.547411	0.066063	0.0146237
	ENSMUSG00000047514	testis-specific protein, Y-encoded-like 1 [Source:MGI Symbol;Acc:MGI:1298395]	Tspyl1	50.3464	54.5256	56.8154	70.3661	59.4784	58.4718		0.146251	0.0661169	0.0146441
	ENSMUSG00000001435	collagen, type XVIII, alpha 1 [Source:MGI Symbol;Acc:MGI:88451]	Col18a1	0.558984	0.796702	0.522438	0.0359009	0.342635	0.28698		-1.11172	0.0661201	0.0146532
	ENSMUSG00000028613	low density lipoprotein receptor-related protein 8, apolipoprotein e receptor [Source:MGI Symbol;Acc:MGI:1340044]	Lrp8	42.1185	38.9996	40.4252	34.6933	37.1112	34.0516		-0.16992	0.0661225	0.0146622
	ENSMUSG00000007815	ras homolog family member A [Source:MGI Symbol;Acc:MGI:1096342]	Rhoa	171.066	177.297	171.965	188.002	185.094	181.246		0.103114	0.0662578	0.0147007
	ENSMUSG00000111086	predicted gene, 48671 [Source:MGI Symbol;Acc:MGI:6098289]	Gm48671	1.87437	1.23579	2.20601	1.19379	1.3021	0.454417		-1.09373	0.0663188	0.0147227
	ENSMUSG00000059436	Max protein [Source:MGI Symbol;Acc:MGI:96921]	Max	115.494	113.585	117.578	144.49	121.686	123.294		0.116299	0.0663234	0.0147406
	ENSMUSG00000032290	protein tyrosine phosphatase, non-receptor type 9 [Source:MGI Symbol;Acc:MGI:1928376]	Ptpn9	60.4044	56.7226	61.926	88.1425	65.6036	66.2686		0.185232	0.0663234	0.0147375
	ENSMUSG00000031659	adenylate cyclase 7 [Source:MGI Symbol;Acc:MGI:102891]	Adcy7	101.406	81.1113	92.1414	86.5158	81.6588	76.5095		-0.175994	0.0663342	0.0147769
	ENSMUSG00000035206	signal peptide peptidase like 2B [Source:MGI Symbol;Acc:MGI:1920468]	Sppl2b	20.6817	16.9111	18.9877	21.9113	15.0576	15.6309		-0.229406	0.0663342	0.0147732
	ENSMUSG00000100865	predicted gene 9320 [Source:MGI Symbol;Acc:MGI:3645000]	Gm9320	5.26011	4.19054	4.23037	7.49799	7.76504	5.10097		0.563701	0.0663342	0.0147693
	ENSMUSG00000023007	pre-mRNA processing factor 40B [Source:MGI Symbol;Acc:MGI:1925583]	Prpf40b	2.98365	1.45231	1.64604	1.22162	1.06874	1.26586		-0.601655	0.0663342	0.0147537
	ENSMUSG00000020290	exportin 1 [Source:MGI Symbol;Acc:MGI:2144013]	Xpo1	199.628	189.126	204.682	230.719	211.62	209.706		0.107168	0.0664267	0.014806
	ENSMUSG00000033066	growth arrest specific 7 [Source:MGI Symbol;Acc:MGI:1202388]	Gas7	2.29122	2.83241	3.10343	0.992023	2.10967	2.03994		-0.549793	0.0665315	0.0148379
	ENSMUSG00000029836	chromobox 3 [Source:MGI Symbol;Acc:MGI:108515]	Cbx3	43.6331	43.9897	46.6191	57.9671	47.9161	48.6459		0.132915	0.0666823	0.01488
	ENSMUSG00000024066	xanthine dehydrogenase [Source:MGI Symbol;Acc:MGI:98973]	Xdh	26.7848	26.8624	26.9634	24.5604	24.3186	22.9		-0.164302	0.0667317	0.0148995
	ENSMUSG00000059851	lysine methyltransferase 5C [Source:MGI Symbol;Acc:MGI:2385262]	Kmt5c	24.9844	21.3704	22.1657	23.5302	18.4286	19.1926		-0.212031	0.0668102	0.0149256
	ENSMUSG00000006517	mevalonate (diphospho) decarboxylase [Source:MGI Symbol;Acc:MGI:2179327]	Mvd	117.665	131.596	127.245	98.5732	109.347	107.362		-0.214079	0.0669531	0.0149746
	ENSMUSG00000032845	alpha-kinase 2 [Source:MGI Symbol;Acc:MGI:2449492]	Alpk2	1.31962	1.4628	1.07522	0.364157	0.800872	0.900004		-0.584243	0.0669531	0.0149676
	ENSMUSG00000028603	sterol carrier protein 2, liver [Source:MGI Symbol;Acc:MGI:98254]	Scp2	34.3834	34.4963	34.311	36.1639	36.4858	39.4583		0.152153	0.0671568	0.0150287
	ENSMUSG00000034064	protein O-glucosyltransferase 1 [Source:MGI Symbol;Acc:MGI:2444232]	Poglut1	7.38475	6.61703	8.41719	11.6614	8.7797	9.08384		0.248921	0.0673634	0.0150836
	ENSMUSG00000020802	ubiquitin-conjugating enzyme E2O [Source:MGI Symbol;Acc:MGI:2444266]	Ube2o	49.2019	44.1254	47.5846	43.7816	40.9887	43.0351		-0.1433	0.0673979	0.0151052
	ENSMUSG00000033434	GTP binding protein 6 (putative) [Source:MGI Symbol;Acc:MGI:1306825]	Gtpbp6	21.9011	19.5985	20.8324	20.5217	18.3936	16.5232		-0.20892	0.0673979	0.0151129
	ENSMUSG00000040618	phosphoenolpyruvate carboxykinase 2 (mitochondrial) [Source:MGI Symbol;Acc:MGI:1860456]	Pck2	18.2624	19.611	17.9084	9.558	17.2426	14.2826		-0.271719	0.0673979	0.0151171
	ENSMUSG00000040054	bromodomain adjacent to zinc finger domain, 2A [Source:MGI Symbol;Acc:MGI:2151152]	Baz2a	55.5313	50.0563	52.4852	51.9272	48.393	45.4533		-0.130797	0.0674778	0.0151437
	ENSMUSG00000039208	meteorin, glial cell differentiation regulator-like [Source:MGI Symbol;Acc:MGI:2384806]	Metrnl	19.9419	30.5904	19.3244	11.2044	17.5948	14.2569		-0.456963	0.067547	0.0151935
	ENSMUSG00000044501	zinc finger protein 758 [Source:MGI Symbol;Acc:MGI:2385044]	Zfp758	15.4476	14.0488	13.5671	17.1628	15.5307	16.8246		0.23071	0.067547	0.0151836
	ENSMUSG00000064288	H4 clustered histone 12 [Source:MGI Symbol;Acc:MGI:2448439]	H4c12	4.80959	3.29296	1.8288	3.23154	5.39727	7.53429		1.21553	0.067547	0.0151741
	ENSMUSG00000104814	predicted gene 42979 [Source:MGI Symbol;Acc:MGI:5663116]	Gm42979	5.2845	3.27917	3.40243	3.50712	2.37541	2.36135		-0.554908	0.067547	0.0151951
	ENSMUSG00000039982	deltex 4, E3 ubiquitin ligase [Source:MGI Symbol;Acc:MGI:2672905]	Dtx4	0.795156	1.04851	1.10742	1.90516	1.49604	1.37084		0.537483	0.067547	0.0152023
	ENSMUSG00000006715	geminin [Source:MGI Symbol;Acc:MGI:1927344]	Gmnn	178.385	183.585	186.114	221.004	203.699	194.612		0.148254	0.0675533	0.0152123
	ENSMUSG00000088609	NA	NA	3912.47	2625.59	2659.87	2699.7	3357.34	5351.42		0.502501	0.0676187	0.0152404
	ENSMUSG00000028274	RNA guanylyltransferase and 5'-phosphatase [Source:MGI Symbol;Acc:MGI:1329041]	Rngtt	20.1441	21.3862	21.3949	23.3975	23.3985	22.4854		0.140167	0.0676187	0.015253
	ENSMUSG00000073985	predicted gene 10602 [Source:MGI Symbol;Acc:MGI:3708759]	Gm10602	0.387675	0.239622	0.41064	0.158728	0.151489	0.234966		-0.902324	0.0676187	0.0152522
	ENSMUSG00000020198	adaptor-related protein complex 3, delta 1 subunit [Source:MGI Symbol;Acc:MGI:107734]	Ap3d1	55.1641	51.059	52.1955	49.1593	47.6594	47.7312		-0.118799	0.0677272	0.0153034
	ENSMUSG00000034152	exocyst complex component 3 [Source:MGI Symbol;Acc:MGI:2443972]	Exoc3	40.6246	42.1356	43.6152	46.6023	45.2185	47.5657		0.138738	0.0677272	0.0152872
	ENSMUSG00000036864	proline and serine rich 3 [Source:MGI Symbol;Acc:MGI:2681861]	Proser3	2.05557	1.66987	1.81445	1.87028	1.47898	0.996692		-0.49668	0.0677272	0.0152959
	ENSMUSG00000021552	G kinase anchoring protein 1 [Source:MGI Symbol;Acc:MGI:1891694]	Gkap1	2.41937	1.89832	1.83554	2.92535	2.70858	2.21045		0.374777	0.0678798	0.0153465
	ENSMUSG00000068141	predicted pseudogene 10232 [Source:MGI Symbol;Acc:MGI:3641637]	Gm10232	9.13822	11.5742	8.71726	11.2027	11.8611	14.9251		0.500958	0.067926	0.0153656
	ENSMUSG00000022102	docking protein 2 [Source:MGI Symbol;Acc:MGI:1332623]	Dok2	334.954	369.729	353.181	278.378	312.518	305.264		-0.189315	0.0679676	0.0154215
	ENSMUSG00000048534	junction adhesion molecule like [Source:MGI Symbol;Acc:MGI:2685484]	Jaml	149.339	138.581	148.154	181.34	150.314	166.862		0.149537	0.0679676	0.0153961
	ENSMUSG00000031988	VPS26 retromer complex component B [Source:MGI Symbol;Acc:MGI:1917656]	Vps26b	55.0778	55.0519	57.8049	66.5618	60.8133	58.0216		0.105272	0.0679676	0.0154358
	ENSMUSG00000042032	methionine adenosyltransferase II, beta [Source:MGI Symbol;Acc:MGI:1913667]	Mat2b	46.9707	50.8578	49.6798	60.9107	52.5046	52.5779		0.128267	0.0679676	0.0154274
	ENSMUSG00000038459	abhydrolase domain containing 17C [Source:MGI Symbol;Acc:MGI:1917428]	Abhd17c	36.1126	35.714	35.9247	32.7251	32.7994	32.4683		-0.119802	0.0679676	0.0153952
	ENSMUSG00000021567	naked cuticle 2 [Source:MGI Symbol;Acc:MGI:1919543]	Nkd2	0.88498	1.23003	0.760058	1.54077	1.42065	1.15974		0.61446	0.0679676	0.0154108
	ENSMUSG00000107994	RIKEN cDNA D830050J10 gene [Source:MGI Symbol;Acc:MGI:2444203]	D830050J10Rik	0.254672	0.0629653	0.0899195	0.695146	0.265377	0.308709		1.41089	0.0679676	0.0154162
	ENSMUSG00000094525	T cell receptor beta, variable 12-2 [Source:MGI Symbol;Acc:MGI:98601]	Trbv12-2	155.906	144.4	141.852	166.621	157.772	163.11		0.168049	0.0679761	0.0154605
	ENSMUSG00000023830	insulin-like growth factor 2 receptor [Source:MGI Symbol;Acc:MGI:96435]	Igf2r	139.067	130.492	140.719	118.272	124.055	125.118		-0.136109	0.0679761	0.0154638
	ENSMUSG00000071398	RIKEN cDNA 2410004P03 gene [Source:MGI Symbol;Acc:MGI:1920917]	2410004P03Rik	0.587431	0.516397	0.414819	0.605742	0.748149	0.917784		0.790994	0.0679761	0.0154636
	ENSMUSG00000036944	transmembrane protein 71 [Source:MGI Symbol;Acc:MGI:2146049]	Tmem71	18.852	20.3632	20.569	26.7835	23.9115	23.002		0.254791	0.0680224	0.015483
	ENSMUSG00000030397	MAP/microtubule affinity regulating kinase 4 [Source:MGI Symbol;Acc:MGI:1920955]	Mark4	17.4791	16.587	16.991	17.7267	15.013	13.9479		-0.184108	0.0680368	0.0154949
	ENSMUSG00000037337	mitogen-activated protein kinase kinase kinase kinase 1 [Source:MGI Symbol;Acc:MGI:1346882]	Map4k1	105.752	109.964	113.645	146.673	118.601	116.085		0.128868	0.0681934	0.015548
	ENSMUSG00000006638	abhydrolase domain containing 1 [Source:MGI Symbol;Acc:MGI:1931013]	Abhd1	4.86651	4.05288	3.25566	3.26261	2.66898	1.90427		-0.617482	0.0681934	0.0155421
	ENSMUSG00000061288	TAO kinase 3 [Source:MGI Symbol;Acc:MGI:3041177]	Taok3	37.8181	36.3368	39.0869	33.1367	35.0423	34.6076		-0.120519	0.0683626	0.0155953
	ENSMUSG00000029602	RAS protein activator like 1 (GAP1 like) [Source:MGI Symbol;Acc:MGI:1330842]	Rasal1	2.83764	1.80637	2.57964	1.8162	1.66539	1.64475		-0.522861	0.0687047	0.0156821
	ENSMUSG00000000223	dystrophin related protein 2 [Source:MGI Symbol;Acc:MGI:107432]	Drp2	0.431868	0.427101	0.4098	0.36838	0.309389	0.209401		-0.617408	0.0687679	0.0157053
	ENSMUSG00000108760	predicted gene, 31897 [Source:MGI Symbol;Acc:MGI:5591056]	Gm31897	3.0657	2.24094	2.44724	2.18297	1.66672	1.16333		-0.72681	0.0688725	0.015738
	ENSMUSG00000032965	intraflagellar transport 57 [Source:MGI Symbol;Acc:MGI:1921166]	Ift57	21.2146	18.3878	20.7625	25.6728	23.6193	21.4333		0.185638	0.0688823	0.015749
	ENSMUSG00000037217	synapsin I [Source:MGI Symbol;Acc:MGI:98460]	Syn1	5.2834	5.43271	4.37333	2.10114	2.95327	3.76633		-0.555574	0.0689912	0.0157827
	ENSMUSG00000020491	RIKEN cDNA 2810021J22 gene [Source:MGI Symbol;Acc:MGI:1917194]	2810021J22Rik	7.37601	6.39367	6.59899	5.22986	5.26693	5.89897		-0.256813	0.0690524	0.0158056
	ENSMUSG00000044424	predicted gene 9493 [Source:MGI Symbol;Acc:MGI:3779903]	Gm9493	10.7142	8.39677	8.27968	11.6981	12.6391	12.3504		0.525481	0.0691266	0.0158314
	ENSMUSG00000099980	predicted gene 5619 [Source:MGI Symbol;Acc:MGI:3643807]	Gm5619	12.1505	14.8703	9.22373	15.7538	19.1502	12.9612		0.578256	0.069132	0.0158472
	ENSMUSG00000052609	pleckstrin homology domain containing, family G (with RhoGef domain) member 3 [Source:MGI Symbol;Acc:MGI:2388284]	Plekhg3	10.8865	10.1238	10.7737	11.1876	9.27218	9.1826		-0.161769	0.069132	0.0158503
	ENSMUSG00000047810	coiled-coil domain containing 88B [Source:MGI Symbol;Acc:MGI:1925567]	Ccdc88b	134.424	138.339	149.045	139.93	135.078	121.348		-0.127495	0.0691395	0.0158737
	ENSMUSG00000015363	TraB domain containing [Source:MGI Symbol;Acc:MGI:1915226]	Trabd	42.5095	45.4296	45.9243	42.1528	39.7569	40.0222		-0.150773	0.0691395	0.0158871
	ENSMUSG00000045098	lysine methyltransferase 5B [Source:MGI Symbol;Acc:MGI:2444557]	Kmt5b	15.0626	14.6177	15.1122	13.0883	13.9182	12.854		-0.147427	0.0691395	0.0158873
	ENSMUSG00000113328	predicted gene, 47260 [Source:MGI Symbol;Acc:MGI:6096093]	Gm47260	5.31611	4.81624	4.51532	4.54601	4.10624	2.77592		-0.413036	0.0691395	0.0158618
	ENSMUSG00000038866	zinc finger, CCHC domain containing 2 [Source:MGI Symbol;Acc:MGI:2444114]	Zcchc2	52.8757	50.3877	49.4078	43.3682	45.8293	45.2941		-0.134179	0.0691705	0.0159211
	ENSMUSG00000029229	cysteine-rich hydrophobic domain 2 [Source:MGI Symbol;Acc:MGI:1921527]	Chic2	9.3528	9.41348	9.97373	12.2023	11.0289	10.195		0.164653	0.0691705	0.0159297
	ENSMUSG00000034308	short chain dehydrogenase/reductase family 42E, member 1 [Source:MGI Symbol;Acc:MGI:1921282]	Sdr42e1	5.15278	5.36614	5.34776	4.38995	4.31176	4.08837		-0.311527	0.0691705	0.0159208
	ENSMUSG00000026814	endoglin [Source:MGI Symbol;Acc:MGI:95392]	Eng	1.39725	0.987021	1.46995	2.42844	2.46626	1.43794		0.553547	0.0691705	0.0159222
	ENSMUSG00000015880	non-SMC condensin I complex, subunit G [Source:MGI Symbol;Acc:MGI:1930197]	Ncapg	60.3615	53.1037	58.0482	78.2114	59.4941	63.7948		0.152359	0.0691719	0.0159475
	ENSMUSG00000053646	plexin B1 [Source:MGI Symbol;Acc:MGI:2154238]	Plxnb1	0.012034	0.0357035	0.0424896	0.118252	0.0626991	0.128369		1.39565	0.0691719	0.0159477
	ENSMUSG00000054277	ADP-ribosylation factor GTPase activating protein 3 [Source:MGI Symbol;Acc:MGI:1913501]	Arfgap3	16.5587	17.0892	17.1258	12.6653	14.4677	15.5332		-0.188012	0.0692656	0.0159782
	ENSMUSG00000002033	CD3 antigen, gamma polypeptide [Source:MGI Symbol;Acc:MGI:88333]	Cd3g	306.531	309.189	313.406	346.939	334.501	336.191		0.130946	0.0694453	28.5377
	ENSMUSG00000031506	protein tyrosine phosphatase, non-receptor type 7 [Source:MGI Symbol;Acc:MGI:2156893]	Ptpn7	242.494	221.484	234.05	208.356	211.647	216.098		-0.10967	0.0694453	0.0160359
	ENSMUSG00000034771	transducin-like enhancer of split 2 [Source:MGI Symbol;Acc:MGI:104635]	Tle2	0.259769	0.0734004	0.0524109	0.3444	0.270688	0.125955		1.2916	0.0694453	0.0160462
	ENSMUSG00000031295	phosphorylase kinase alpha 2 [Source:MGI Symbol;Acc:MGI:97577]	Phka2	10.9761	10.5916	11.6465	11.631	10.1094	9.07605		-0.187817	0.0694739	0.0160617
	ENSMUSG00000025630	hypoxanthine guanine phosphoribosyl transferase [Source:MGI Symbol;Acc:MGI:96217]	Hprt	568.912	572.64	567.485	640.025	602.343	642.015		0.147	0.0698138	0.0161581
	ENSMUSG00000043372	hexamethylene bis-acetamide inducible 2 [Source:MGI Symbol;Acc:MGI:1918309]	Hexim2	3.74552	2.98258	3.91587	2.97416	3.04126	2.26423		-0.436245	0.0698138	0.0161579
	ENSMUSG00000030361	killer cell lectin-like receptor subfamily B member 1A [Source:MGI Symbol;Acc:MGI:107540]	Klrb1a	0.65133	0.143142	0.153314	0.0790157	0.0754119	0		-1.75712	0.0698434	0.0161739
	ENSMUSG00000018661	component of oligomeric golgi complex 1 [Source:MGI Symbol;Acc:MGI:1333873]	Cog1	26.6413	28.8652	27.7209	26.2826	24.7703	24.1069		-0.154291	0.070078	0.0162461
	ENSMUSG00000023186	von Willebrand factor A domain containing 5A [Source:MGI Symbol;Acc:MGI:1915026]	Vwa5a	23.8447	21.997	23.9428	32.4401	26.1482	25.3397		0.183351	0.070078	0.0162449
	ENSMUSG00000042712	transcription elongation factor A like 9 [Source:MGI Symbol;Acc:MGI:109567]	Tceal9	80.8122	74.0858	81.512	96.2544	84.3249	89.1618		0.152678	0.0702822	0.0163024
	ENSMUSG00000028454	phosphatidylinositol glycan anchor biosynthesis, class O [Source:MGI Symbol;Acc:MGI:1861452]	Pigo	32.5565	31.0244	33.1719	29.2491	29.9371	26.9456		-0.172265	0.070426	0.0163447
	ENSMUSG00000025758	polo like kinase 4 [Source:MGI Symbol;Acc:MGI:101783]	Plk4	54.5578	54.5218	55.9942	63.9067	58.4477	58.5409		0.109768	0.0704369	0.0163563
	ENSMUSG00000072235	tubulin, alpha 1A [Source:MGI Symbol;Acc:MGI:98869]	Tuba1a	140.014	156.703	146.884	178.595	164.445	165.641		0.189484	0.0704404	0.0163724
	ENSMUSG00000034799	unc-13 homolog A [Source:MGI Symbol;Acc:MGI:3051532]	Unc13a	4.76425	4.40418	4.30064	3.42457	4.05927	3.47617		-0.222122	0.0704404	0.0163839
	ENSMUSG00000033847	phospholipase A2, group IVC (cytosolic, calcium-independent) [Source:MGI Symbol;Acc:MGI:1196403]	Pla2g4c	1.87917	1.31004	1.39225	1.37903	0.866723	1.07546		-0.520455	0.0704404	0.0163841
	ENSMUSG00000032802	sulfiredoxin 1 homolog (S. cerevisiae) [Source:MGI Symbol;Acc:MGI:104971]	Srxn1	34.056	33.923	32.3158	11.3069	24.5256	28.6196		-0.41998	0.0704599	0.0163976
	ENSMUSG00000067344	ribosomal protein S25, pseudogene 1 [Source:MGI Symbol;Acc:MGI:3642902]	Rps25-ps1	14.6578	13.288	11.6446	17.3375	18.1378	16.8795		0.50087	0.0705294	0.0164228
	ENSMUSG00000032202	RAB27A, member RAS oncogene family [Source:MGI Symbol;Acc:MGI:1861441]	Rab27a	185.123	177.841	181.978	139.676	164.624	167.344		-0.137916	0.0706911	0.0164875
	ENSMUSG00000055093	ribosomal protein S27A, pseudogene 3 [Source:MGI Symbol;Acc:MGI:3645406]	Rps27a-ps3	35.2907	29.8114	30.978	54.0511	46.223	39.6893		0.495833	0.0706911	0.0164787
	ENSMUSG00000063873	solute carrier family 24 (sodium/potassium/calcium exchanger), member 3 [Source:MGI Symbol;Acc:MGI:2137513]	Slc24a3	9.71191	9.3796	8.66199	4.52869	6.61498	8.19178		-0.34338	0.0706911	0.0164697
	ENSMUSG00000041773	ectodermal-neural cortex 1 [Source:MGI Symbol;Acc:MGI:109610]	Enc1	8.74803	9.61542	10.2557	12.7174	12.3405	10.1848		0.23293	0.070711	0.0165011
	ENSMUSG00000020828	phospholipase D2 [Source:MGI Symbol;Acc:MGI:892877]	Pld2	3.1387	2.13632	2.30768	1.67314	1.90466	1.61139		-0.441668	0.0707428	0.0165176
	ENSMUSG00000078919	dolichol-phosphate (beta-D) mannosyltransferase 1 [Source:MGI Symbol;Acc:MGI:1330239]	Dpm1	2.82063	2.3322	2.23127	2.32236	1.81491	1.80858		-0.32417	0.0708229	0.0165453
	ENSMUSG00000029279	bromodomain, testis-specific [Source:MGI Symbol;Acc:MGI:1891374]	Brdt	1.55712	1.22748	1.33861	0.640622	0.917106	1.05044		-0.499796	0.070867	0.0165647
	ENSMUSG00000054051	excision repair cross-complementing rodent repair deficiency, complementation group 6 [Source:MGI Symbol;Acc:MGI:1100494]	Ercc6	17.6231	16.3892	15.2546	13.9064	14.8258	13.3705		-0.164583	0.0708866	0.0166145
	ENSMUSG00000084314	ribosomal protein S15A, pseudogene 3 [Source:MGI Symbol;Acc:MGI:3650886]	Rps15a-ps3	5.26011	1.73402	3.71447	9.5719	7.30827	4.81758		0.883197	0.0708866	0.0165979
	ENSMUSG00000105139	predicted gene, 19391 [Source:MGI Symbol;Acc:MGI:5011576]	Gm19391	3.12634	2.27056	3.07007	1.76005	1.67977	2.27381		-0.560854	0.0708866	0.0165988
	ENSMUSG00000031480	thrombospondin, type I, domain 1 [Source:MGI Symbol;Acc:MGI:1929096]	Thsd1	0.417658	0.361417	0.313366	0.171004	0.163205	0.202511		-0.848295	0.0708866	0.0166076
	ENSMUSG00000020333	acyl-CoA synthetase long-chain family member 6 [Source:MGI Symbol;Acc:MGI:894291]	Acsl6	0.128075	0.0230293	0.0575534	0.406794	0.327578	0.0677454		1.54399	0.0708866	0.0166072
	ENSMUSG00000020430	pescadillo ribosomal biogenesis factor 1 [Source:MGI Symbol;Acc:MGI:1890613]	Pes1	182.077	191.204	188.739	207.466	201.305	200.333		0.118148	0.0709957	0.0166582
	ENSMUSG00000037443	centrosomal protein 85 [Source:MGI Symbol;Acc:MGI:1917262]	Cep85	36.7387	35.8782	36.8498	37.0029	32.5074	33.439		-0.117823	0.0709957	0.0166543
	ENSMUSG00000028884	replication protein A2 [Source:MGI Symbol;Acc:MGI:1339939]	Rpa2	97.4966	103.362	102.455	122.872	114.535	102.588		0.131764	0.0711732	0.0167192
	ENSMUSG00000044551	RIKEN cDNA 9930012K11 gene [Source:MGI Symbol;Acc:MGI:2145726]	9930012K11Rik	16.5474	16.4088	15.4331	13.3432	13.4318	13.3651		-0.223328	0.0711732	0.0167203
	ENSMUSG00000117804	predicted gene 6252 [Source:MGI Symbol;Acc:MGI:3644748]	Gm6252	1.79116	4.7237	2.52968	3.2594	4.56242	5.2109		0.79942	0.0711732	0.0167271
	ENSMUSG00000029670	inhibitor of growth family, member 3 [Source:MGI Symbol;Acc:MGI:1919027]	Ing3	21.3965	20.3272	21.4147	24.6226	23.5999	22.5696		0.152709	0.0711963	0.0167416
	ENSMUSG00000026675	hydroxysteroid (17-beta) dehydrogenase 7 [Source:MGI Symbol;Acc:MGI:1330808]	Hsd17b7	74.9256	80.115	76.2418	56.595	70.0152	68.8646		-0.157171	0.0712463	0.0167625
	ENSMUSG00000061062	histone deacetylase 1, pseudogene [Source:MGI Symbol;Acc:MGI:3704479]	Hdac1-ps	9.19284	8.53798	10.8946	13.9645	13.2443	11.2403		0.324322	0.071339	0.0167934
	ENSMUSG00000066148	pre-mRNA processing factor 4 [Source:MGI Symbol;Acc:MGI:1917302]	Prpf4	65.3582	62.503	64.8819	58.8481	56.8428	60.2227		-0.122368	0.07142	0.0168276
	ENSMUSG00000017692	rhomboid like 3 [Source:MGI Symbol;Acc:MGI:2179276]	Rhbdl3	0.438898	0.361711	0.430461	0.212978	0.203265	0.260101		-0.812817	0.07142	0.0168307
	ENSMUSG00000052751	replication initiator 1 [Source:MGI Symbol;Acc:MGI:1889817]	Repin1	5.57549	5.11189	5.35211	8.71906	6.62685	5.80106		0.283082	0.0714793	0.0168538
	ENSMUSG00000025332	lysine (K)-specific demethylase 5C [Source:MGI Symbol;Acc:MGI:99781]	Kdm5c	50.5392	47.8942	50.9479	47.1682	43.9173	46.3968		-0.129232	0.0715416	0.0168868
	ENSMUSG00000023571	C1q and tumor necrosis factor related 12 [Source:MGI Symbol;Acc:MGI:1914639]	C1qtnf12	3.5491	6.602	6.44458	9.96431	9.77401	6.63761		0.536064	0.0715416	0.0168812
	ENSMUSG00000022009	nuclear fragile X mental retardation protein interacting protein 1 [Source:MGI Symbol;Acc:MGI:1351474]	Nufip1	39.9387	42.8875	41.2688	48.3316	45.9154	43.6034		0.143851	0.0716293	0.0169166
	ENSMUSG00000052736	killer cell lectin-like receptor subfamily C, member 2 [Source:MGI Symbol;Acc:MGI:1336162]	Klrc2	0.714984	0.923147	0.855511	1.62633	1.11755	1.13633		0.492176	0.0716859	0.0169392
	ENSMUSG00000027737	solute carrier family 7 (cationic amino acid transporter, y+ system), member 11 [Source:MGI Symbol;Acc:MGI:1347355]	Slc7a11	0.746208	0.729772	0.784557	0.0814732	0.596139	0.474381		-0.750437	0.0716859	0.0169483
	ENSMUSG00000078866	zinc finger protein 970 [Source:MGI Symbol;Acc:MGI:3652255]	Zfp970	1.80692	1.26139	0.675514	3.01729	2.15976	1.28842		0.934046	0.0716974	0.0169601
	ENSMUSG00000043421	hypoxia inducible lipid droplet associated [Source:MGI Symbol;Acc:MGI:1916823]	Hilpda	55.4651	71.6192	57.051	33.707	51.4715	47.1905		-0.30476	0.0717844	0.0169904
	ENSMUSG00000106681	predicted gene 43004 [Source:MGI Symbol;Acc:MGI:5663141]	Gm43004	0.164197	0.324768	0.347846	0.717098	0	0		-1.81142	0.0717844	0.0169991
	ENSMUSG00000026313	histone deacetylase 4 [Source:MGI Symbol;Acc:MGI:3036234]	Hdac4	10.8036	10.9947	11.0724	11.2856	10.1091	9.64848		-0.117718	0.0718529	0.0170245
	ENSMUSG00000050471	family with sequence similarity 118, member B [Source:MGI Symbol;Acc:MGI:1924483]	Fam118b	11.6901	10.4982	11.2242	13.8752	12.0636	12.3786		0.166784	0.0719335	0.0170527
	ENSMUSG00000038538	ubinuclein 2 [Source:MGI Symbol;Acc:MGI:2444236]	Ubn2	8.15194	7.09814	7.59303	7.47785	6.95725	6.60516		-0.130371	0.071982	0.0170734
	ENSMUSG00000010067	Ras association (RalGDS/AF-6) domain family member 1 [Source:MGI Symbol;Acc:MGI:1928386]	Rassf1	71.6082	73.845	73.2004	64.4704	68.2387	65.2094		-0.116358	0.0719984	0.0170865
	ENSMUSG00000097657	predicted gene 7389 [Source:MGI Symbol;Acc:MGI:3645153]	Gm7389	1.96119	1.10831	1.2436	0.830295	1.00096	0.621015		-0.695398	0.0720387	0.0171053
	ENSMUSG00000014873	surfeit gene 2 [Source:MGI Symbol;Acc:MGI:98444]	Surf2	54.328	52.422	55.7286	48.7405	49.4116	49.6955		-0.126456	0.0720469	0.0171256
	ENSMUSG00000096096	T cell receptor alpha variable 4-4-DV10 [Source:MGI Symbol;Acc:MGI:3702138]	Trav4-4-dv10	6.07527	6.32443	5.41908	6.63316	8.66297	9.30232		0.617551	0.0720469	0.0171233
	ENSMUSG00000020608	structural maintenance of chromosomes 6 [Source:MGI Symbol;Acc:MGI:1914491]	Smc6	49.5162	46.3125	50.9336	59.2952	51.203	53.4082		0.113348	0.0721522	0.0171598
	ENSMUSG00000059981	TAO kinase 2 [Source:MGI Symbol;Acc:MGI:1915919]	Taok2	37.4194	33.6978	36.3637	38.4205	32.3816	30.8322		-0.139893	0.0722768	0.0172172
	ENSMUSG00000024642	transducin-like enhancer of split 4 [Source:MGI Symbol;Acc:MGI:104633]	Tle4	25.0618	27.2877	25.6315	35.475	31.5788	27.209		0.22831	0.0722768	0.0172153
	ENSMUSG00000021179	nrde-2 necessary for RNA interference, domain containing [Source:MGI Symbol;Acc:MGI:2670969]	Nrde2	21.9526	22.7986	23.5833	27.1824	24.624	25.2901		0.142383	0.0722768	0.0172103
	ENSMUSG00000025158	RFNG O-fucosylpeptide 3-beta-N-acetylglucosaminyltransferase [Source:MGI Symbol;Acc:MGI:894275]	Rfng	21.3794	20.7306	22.2693	19.2412	18.557	18.6188		-0.203816	0.0723115	0.0172369
	ENSMUSG00000039981	zinc finger CCCH type containing 12D [Source:MGI Symbol;Acc:MGI:3045313]	Zc3h12d	6.1213	3.62666	4.80068	10.8105	5.87888	6.72941		0.495583	0.0723115	0.0172439
	ENSMUSG00000031812	microtubule-associated protein 1 light chain 3 beta [Source:MGI Symbol;Acc:MGI:1914693]	Map1lc3b	17.9817	19.2563	17.0463	22.7012	20.6417	18.912		0.197465	0.0723446	0.0172702
	ENSMUSG00000021211	aldo-keto reductase family 1, member C12 [Source:MGI Symbol;Acc:MGI:1351661]	Akr1c12	10.8016	12.4024	11.7	32.0822	14.2125	14.8245		0.443002	0.0723446	0.0172683
	ENSMUSG00000056209	nucleoplasmin 3 [Source:MGI Symbol;Acc:MGI:894653]	Npm3	305.156	318.233	331.748	392.636	342.606	360.804		0.155385	0.07235	0.0172808
	ENSMUSG00000022744	claudin domain containing 1 [Source:MGI Symbol;Acc:MGI:2447860]	Cldnd1	107.864	96.3846	108.227	126.866	109.159	127.224		0.186032	0.0723605	0.0172984
	ENSMUSG00000019795	protein-L-isoaspartate (D-aspartate) O-methyltransferase 1 [Source:MGI Symbol;Acc:MGI:97502]	Pcmt1	57.5193	57.9007	58.292	65.2589	60.4979	63.229		0.11543	0.0723605	0.0173018
	ENSMUSG00000040225	proline-rich coiled-coil 2C [Source:MGI Symbol;Acc:MGI:1913754]	Prrc2c	124.762	112.113	126.584	120.9	113.166	109.281		-0.109876	0.0726001	0.0173776
	ENSMUSG00000079553	kinesin family member C1 [Source:MGI Symbol;Acc:MGI:109596]	Kifc1	70.7661	72.2587	75.0417	98.1218	76.8409	79.8386		0.140252	0.0726001	0.0173686
	ENSMUSG00000074892	UDP-Gal:betaGlcNAc beta 1,3-galactosyltransferase, polypeptide 5 [Source:MGI Symbol;Acc:MGI:2136878]	B3galt5	4.02947	3.94792	4.30125	2.76247	3.55436	3.12605		-0.327184	0.0726489	0.0173985
	ENSMUSG00000031090	NAD synthetase 1 [Source:MGI Symbol;Acc:MGI:1926164]	Nadsyn1	9.25257	8.42531	8.92539	8.69172	7.89509	6.53479		-0.256175	0.072749	0.0174318
	ENSMUSG00000087700	predicted gene 15283 [Source:MGI Symbol;Acc:MGI:3705161]	Gm15283	0.735849	0.582181	0.103925	0.37493	0.613423	0.713587		1.4025	0.0728371	0.0174622
	ENSMUSG00000025007	aldehyde dehydrogenase 18 family, member A1 [Source:MGI Symbol;Acc:MGI:1888908]	Aldh18a1	166.625	174.935	171.491	147.138	161.37	153.035		-0.114354	0.0731203	0.0175438
	ENSMUSG00000044468	terminal nucleotidyltransferase 5C [Source:MGI Symbol;Acc:MGI:1921895]	Tent5c	2.38547	2.43403	1.83158	3.8241	2.95921	2.62541		0.511107	0.0731203	0.0175488
	ENSMUSG00000060166	zinc finger, DHHC domain containing 8 [Source:MGI Symbol;Acc:MGI:1338012]	Zdhhc8	41.4723	40.6394	43.2509	62.7302	47.6631	42.839		0.162544	0.0731683	0.0175774
	ENSMUSG00000095105	EDAR (ectodysplasin-A receptor)-associated death domain [Source:MGI Symbol;Acc:MGI:1931001]	Edaradd	9.69419	9.96383	9.02157	7.04997	7.84683	7.57109		-0.270842	0.0731683	0.0175829
	ENSMUSG00000041538	histocompatibility 2, O region beta locus [Source:MGI Symbol;Acc:MGI:95925]	H2-Ob	0.150188	0.0636558	0.0909056	0.53879	0.178858	0.291288		1.34935	0.0731683	0.0175883
	ENSMUSG00000032637	ataxin 2-like [Source:MGI Symbol;Acc:MGI:2446242]	Atxn2l	219.298	219.957	221.269	214.135	208.645	188.787		-0.12133	0.0732355	0.0176138
	ENSMUSG00000025473	a disintegrin and metallopeptidase domain 8 [Source:MGI Symbol;Acc:MGI:107825]	Adam8	247.834	256.494	247.102	127.253	199.069	191.68		-0.395023	0.0736033	0.0177667
	ENSMUSG00000037169	v-myc avian myelocytomatosis viral related oncogene, neuroblastoma derived [Source:MGI Symbol;Acc:MGI:97357]	Mycn	100.962	122.402	116.492	82.5793	104.95	94.6122		-0.203134	0.0736033	0.0177427
	ENSMUSG00000048120	ectonucleoside triphosphate diphosphohydrolase 1 [Source:MGI Symbol;Acc:MGI:102805]	Entpd1	83.9248	82.4256	82.7391	51.7898	68.8496	71.2551		-0.269557	0.0736033	0.0177574
	ENSMUSG00000038828	transmembrane protein 214 [Source:MGI Symbol;Acc:MGI:1916046]	Tmem214	23.3601	24.4728	24.1633	19.0541	21.819	21.5754		-0.149244	0.0736033	0.0177246
	ENSMUSG00000024299	a disintegrin-like and metallopeptidase (reprolysin type) with thrombospondin type 1 motif, 10 [Source:MGI Symbol;Acc:MGI:2449112]	Adamts10	26.1655	18.7817	20.3434	22.5828	15.8549	17.1962		-0.291701	0.0736033	0.0177673
	ENSMUSG00000042831	alkB homolog 6 [Source:MGI Symbol;Acc:MGI:2142037]	Alkbh6	7.90972	8.88246	8.95249	8.35357	6.66307	7.2403		-0.285656	0.0736033	0.0177681
	ENSMUSG00000043154	protein phosphatase 2, regulatory subunit B'', alpha [Source:MGI Symbol;Acc:MGI:2442104]	Ppp2r3a	2.56717	2.36469	2.48692	2.13507	2.09564	1.96824		-0.258253	0.0736033	0.0177362
	ENSMUSG00000020621	retinol dehydrogenase 14 (all-trans and 9-cis) [Source:MGI Symbol;Acc:MGI:1920402]	Rdh14	13.1809	12.9583	14.7052	16.2647	16.0918	17.2445		0.261998	0.0736061	0.0177781
	ENSMUSG00000030208	epithelial membrane protein 1 [Source:MGI Symbol;Acc:MGI:107941]	Emp1	87.8125	91.6326	88.4065	83.5387	100.319	103.432		0.182494	0.073632	0.0177938
	ENSMUSG00000050394	armadillo repeat containing, X-linked 6 [Source:MGI Symbol;Acc:MGI:2147993]	Armcx6	0.278592	0.137759	0.295096	0.456263	0.483837	0.495301		0.944498	0.0736794	0.0178146
	ENSMUSG00000020455	tripartite motif-containing 11 [Source:MGI Symbol;Acc:MGI:2137355]	Trim11	33.694	33.8642	33.174	34.183	30.5073	26.5774		-0.184726	0.0738264	0.017869
	ENSMUSG00000056214	par-6 family cell polarity regulator gamma [Source:MGI Symbol;Acc:MGI:2135606]	Pard6g	3.48455	2.32157	3.26359	4.72562	4.01322	3.69925		0.370999	0.0738264	0.0178598
	ENSMUSG00000010095	solute carrier family 3 (activators of dibasic and neutral amino acid transport), member 2 [Source:MGI Symbol;Acc:MGI:96955]	Slc3a2	252.579	252.735	256.316	204.884	234.327	234.47		-0.121259	0.0739246	0.017927
	ENSMUSG00000102869	non-coding RNA activated by DNA damage [Source:MGI Symbol;Acc:MGI:1914767]	Norad	78.6287	75.1827	78.2117	68.3613	72.0468	70.4651		-0.110581	0.0739246	0.0179149
	ENSMUSG00000034438	guanylate-binding protein 8 [Source:MGI Symbol;Acc:MGI:1923324]	Gbp8	45.2602	38.4941	39.4421	41.6928	36.6121	31.5689		-0.197558	0.0739246	0.01794
	ENSMUSG00000051444	Bardet-Biedl syndrome 12 (human) [Source:MGI Symbol;Acc:MGI:2686651]	Bbs12	34.9228	26.7582	28.9776	29.438	23.7503	26.1464		-0.20738	0.0739246	0.0179365
	ENSMUSG00000076926	T cell receptor alpha joining 2 [Source:MGI Symbol;Acc:MGI:4840255]	Traj2	1.74894	5.18891	1.23503	5.72864	10.9347	3.39206		1.46768	0.0739246	0.0179301
	ENSMUSG00000015488	calcium channel flower domain containing 1 [Source:MGI Symbol;Acc:MGI:1924317]	Cacfd1	15.963	14.3516	15.7362	14.5554	12.6613	14.0012		-0.188156	0.0739343	0.0179518
	ENSMUSG00000058239	upstream transcription factor 2 [Source:MGI Symbol;Acc:MGI:99961]	Usf2	36.4012	40.1333	38.619	51.6766	44.1472	39.7758		0.1727	0.0739466	0.0179642
	ENSMUSG00000115312	predicted gene 8518 [Source:MGI Symbol;Acc:MGI:3645036]	Gm8518	11.0719	13.2794	17.3005	12.8602	10.5554	9.59468		-0.516554	0.0739556	0.0179853
	ENSMUSG00000038170	phosphodiesterase 4D interacting protein (myomegalin) [Source:MGI Symbol;Acc:MGI:1891434]	Pde4dip	8.10757	7.02259	8.28805	6.13066	7.20678	6.95918		-0.168537	0.0739556	0.0179813
	ENSMUSG00000026721	RAB GTPase activating protein 1-like [Source:MGI Symbol;Acc:MGI:1352507]	Rabgap1l	5.1723	5.21839	5.19274	7.90942	5.88155	5.60364		0.208022	0.0740412	0.0180155
	ENSMUSG00000105388	ribosomal protein L36A, pseudogene 2 [Source:MGI Symbol;Acc:MGI:3780887]	Rpl36a-ps2	51.4222	61.5233	54.8492	89.9093	65.949	65.9074		0.310599	0.0740553	0.0180284
	ENSMUSG00000021488	nuclear receptor-binding SET-domain protein 1 [Source:MGI Symbol;Acc:MGI:1276545]	Nsd1	42.8827	37.3621	42.5953	38.3143	35.5211	37.6925		-0.154072	0.0740743	0.0180425
	ENSMUSG00000033257	tubulin tyrosine ligase-like family, member 4 [Source:MGI Symbol;Acc:MGI:1914784]	Ttll4	22.6715	19.1729	21.7304	21.9872	18.7096	18.1594		-0.165985	0.0741586	0.0180725
	ENSMUSG00000087412	predicted pseudogene 15501 [Source:MGI Symbol;Acc:MGI:3704296]	Gm15501	25.0167	25.1439	19.97	33.1033	29.4684	24.919		0.358274	0.0741609	0.018092
	ENSMUSG00000091422	predicted gene 6455 [Source:MGI Symbol;Acc:MGI:3648736]	Gm6455	1.02068	0.825888	1.24496	0.303931	0.0966897	1.25975		-1.44954	0.0741609	0.018091
	ENSMUSG00000041058	WW domain containing E3 ubiquitin protein ligase 1 [Source:MGI Symbol;Acc:MGI:1861728]	Wwp1	52.787	45.0751	47.836	40.3499	45.6486	41.0942		-0.143653	0.0742859	0.018132
	ENSMUSG00000014444	piezo-type mechanosensitive ion channel component 1 [Source:MGI Symbol;Acc:MGI:3603204]	Piezo1	43.4533	36.8494	42.7866	44.3864	36.1996	36.4376		-0.145164	0.0743456	0.018175
	ENSMUSG00000105699	predicted gene 43703 [Source:MGI Symbol;Acc:MGI:5663840]	Gm43703	4.08468	4.48844	4.4869	6.93743	7.56688	5.7216		0.606798	0.0743456	0.0181746
	ENSMUSG00000049897	serine/threonine kinase-like domain containing 1 [Source:MGI Symbol;Acc:MGI:2685557]	Stkld1	0.210735	0.208409	0.0744062	0.172565	0.274491	0.357629		1.24178	0.0743456	0.0181605
	ENSMUSG00000081924	predicted gene 11191 [Source:MGI Symbol;Acc:MGI:3641971]	Gm11191	4.73074	4.49138	1.87077	3.51231	5.52114	5.32164		0.944922	0.074372	0.018191
	ENSMUSG00000029580	actin, beta [Source:MGI Symbol;Acc:MGI:87904]	Actb	16104.5	16517.6	16426	13831.1	14693.2	14770.8		-0.144893	0.0744728	0.0182251
	ENSMUSG00000017802	reticulophagy regulator family member 3 [Source:MGI Symbol;Acc:MGI:1915248]	Retreg3	65.0963	63.1055	57.9601	79.1506	65.8551	65.6532		0.161847	0.074865	0.0183307
	ENSMUSG00000073448	predicted gene 10509 [Source:MGI Symbol;Acc:MGI:3796835]	Gm10509	17.5268	18.1458	20.4022	17.7907	13.8403	15.2703		-0.364642	0.0748797	0.0183438
	ENSMUSG00000066036	ubiquitin protein ligase E3 component n-recognin 4 [Source:MGI Symbol;Acc:MGI:1916366]	Ubr4	40.5484	38.7688	42.0763	39.6991	36.0505	34.9242		-0.171835	0.0752777	0.018451
	ENSMUSG00000023935	spermatogenesis associated, serine-rich 1 [Source:MGI Symbol;Acc:MGI:1918270]	Spats1	0.0950825	0.0235082	0.20143	0.285488	0.371546	0.253566		1.37803	0.0753283	0.018473
	ENSMUSG00000113211	RIKEN cDNA 4921525O09 gene [Source:MGI Symbol;Acc:MGI:1921300]	4921525O09Rik	2.89577	2.22402	2.34943	1.47994	1.99025	1.6132		-0.43126	0.0753599	0.0184903
	ENSMUSG00000114133	predicted gene, 20075 [Source:MGI Symbol;Acc:MGI:5012260]	Gm20075	0.320491	0.581081	0.188598	0.583202	0.667924	0.466192		1.04236	0.075467	0.0185262
	ENSMUSG00000005973	reticulocalbin 1 [Source:MGI Symbol;Acc:MGI:104559]	Rcn1	56.0176	51.2202	56.8238	78.9462	58.3345	60.2419		0.155817	0.0754762	0.0185509
	ENSMUSG00000023980	TATA-box binding protein associated factor 8 [Source:MGI Symbol;Acc:MGI:1926879]	Taf8	32.1077	30.8224	28.7996	35.0006	31.8931	33.2335		0.149674	0.0754762	0.0185574
	ENSMUSG00000032551	RIKEN cDNA 1110059G10 gene [Source:MGI Symbol;Acc:MGI:1913452]	1110059G10Rik	12.1538	10.8156	11.5405	12.7292	13.1807	12.1263		0.15778	0.0754762	0.0185519
	ENSMUSG00000035900	GRAM domain containing 4 [Source:MGI Symbol;Acc:MGI:2676308]	Gramd4	70.0004	66.2134	64.2344	65.7656	58.4449	59.5179		-0.128674	0.075803	0.0186474
	ENSMUSG00000035370	predicted gene, 49322 [Source:MGI Symbol;Acc:MGI:6121503]	Gm49322	2.14516	1.56586	1.28039	1.22684	1.06444	0.817246		-0.589911	0.0758352	0.018665
	ENSMUSG00000034028	CD226 antigen [Source:MGI Symbol;Acc:MGI:3039602]	Cd226	33.7015	32.9328	35.398	48.8814	35.5116	41.2186		0.198204	0.0759483	1.84035
	ENSMUSG00000037548	histocompatibility 2, class II, locus Mb2 [Source:MGI Symbol;Acc:MGI:95923]	H2-DMb2	2.77508	1.96032	2.98613	7.21408	4.40644	3.07557		0.564963	0.0759483	0.0187123
	ENSMUSG00000028060	KH domain containing 4, pre-mRNA splicing factor [Source:MGI Symbol;Acc:MGI:1921450]	Khdc4	46.8248	41.4665	44.1887	46.211	38.9663	38.8285		-0.139159	0.075974	0.0187815
	ENSMUSG00000037913	transmembrane protein 156 [Source:MGI Symbol;Acc:MGI:2685292]	Tmem156	27.7325	30.7038	28.8457	19.7291	24.6816	26.3861		-0.203709	0.075974	0.0187618
	ENSMUSG00000024566	ATPase, class II, type 9B [Source:MGI Symbol;Acc:MGI:1354757]	Atp9b	19.6217	16.5068	18.1869	18.1072	16.1286	15.8661		-0.141076	0.075974	0.0187328
	ENSMUSG00000045282	transmembrane protein 86B [Source:MGI Symbol;Acc:MGI:1915505]	Tmem86b	20.7738	15.6615	19.3894	15.9099	15.4352	15.182		-0.271292	0.075974	0.0187769
	ENSMUSG00000117660	predicted gene, 18086 [Source:MGI Symbol;Acc:MGI:5010271]	Gm18086	5.52132	5.80165	2.55867	5.08641	9.34927	4.685		0.892641	0.075974	0.018758
	ENSMUSG00000034898	filamin A interacting protein 1 [Source:MGI Symbol;Acc:MGI:1917848]	Filip1	2.2551	2.97361	2.38869	0.917284	2.28077	1.35072		-0.549054	0.075974	0.0187962
	ENSMUSG00000029126	neuron specific gene family member 1 [Source:MGI Symbol;Acc:MGI:109149]	Nsg1	0.466747	0.568117	0.456366	1.37202	0.82308	0.696348		0.750032	0.075974	0.0187932
	ENSMUSG00000001911	nuclear factor I/X [Source:MGI Symbol;Acc:MGI:97311]	Nfix	0.376864	0.295057	0.476808	1.30299	0.621781	0.563421		0.647644	0.075974	0.0187759
	ENSMUSG00000032777	general transcription factor III C 1 [Source:MGI Symbol;Acc:MGI:107887]	Gtf3c1	31.8398	29.8071	32.7187	31.4289	29.465	28.3803		-0.107838	0.0760238	0.0188182
	ENSMUSG00000044456	Ras and Rab interactor 3 [Source:MGI Symbol;Acc:MGI:2385708]	Rin3	38.8088	38.1968	40.1538	36.4722	35.8822	35.8988		-0.114948	0.0760828	0.0188522
	ENSMUSG00000117875	predicted gene 6789 [Source:MGI Symbol;Acc:MGI:3643581]	Gm6789	9.08439	8.65443	10.3582	9.55462	14.7638	10.9917		0.373686	0.0760828	0.0188484
	ENSMUSG00000011958	BCL2/adenovirus E1B interacting protein 2 [Source:MGI Symbol;Acc:MGI:109327]	Bnip2	141.089	138.111	139.148	124.717	128.846	128.721		-0.100871	0.0762171	0.0188952
	ENSMUSG00000015202	Cnksr family member 3 [Source:MGI Symbol;Acc:MGI:2674130]	Cnksr3	1.35375	0.773536	1.10467	4.26998	1.41066	1.77957		0.716738	0.0763134	0.0189386
	ENSMUSG00000062995	islet cell autoantigen 1 [Source:MGI Symbol;Acc:MGI:96391]	Ica1	0.78306	0.387208	0.502695	0.54407	0.222538	0.276134		-0.88879	0.0763134	0.0189317
	ENSMUSG00000059195	predicted gene 12715 [Source:MGI Symbol;Acc:MGI:3650759]	Gm12715	33.4625	39.064	44.2246	27.0384	37.9613	28.2822		-0.317584	0.0764134	0.0189732
	ENSMUSG00000043510	HscB iron-sulfur cluster co-chaperone [Source:MGI Symbol;Acc:MGI:2141135]	Hscb	48.4679	57.7718	58.8147	71.4402	63.2643	66.1733		0.228949	0.0765123	0.0190173
	ENSMUSG00000032352	leucine rich repeat containing 1 [Source:MGI Symbol;Acc:MGI:2442313]	Lrrc1	2.98611	2.38202	3.06354	2.13767	2.15759	2.40404		-0.336492	0.0765123	0.019014
	ENSMUSG00000062397	zinc finger protein 706 [Source:MGI Symbol;Acc:MGI:1915286]	Zfp706	63.7288	63.117	69.7295	71.6557	72.0339	71.6439		0.122036	0.0768829	0.0191682
	ENSMUSG00000028293	solute carrier family 35 (CMP-sialic acid transporter), member 1 [Source:MGI Symbol;Acc:MGI:1345622]	Slc35a1	26.8817	22.4528	23.7106	23.0844	19.0416	21.1379		-0.224206	0.0768829	0.0191483
	ENSMUSG00000022023	WW domain binding protein 4 [Source:MGI Symbol;Acc:MGI:109568]	Wbp4	17.3618	15.767	16.5588	18.9395	17.3921	18.2569		0.132562	0.0768829	0.0191302
	ENSMUSG00000021177	tyrosyl-DNA phosphodiesterase 1 [Source:MGI Symbol;Acc:MGI:1920036]	Tdp1	13.2222	14.4053	14.0207	15.2883	15.6752	14.798		0.148025	0.0768829	0.0191207
	ENSMUSG00000028093	acid phosphatase 6, lysophosphatidic [Source:MGI Symbol;Acc:MGI:1931010]	Acp6	6.82834	6.64556	6.48031	7.05519	5.50273	5.38429		-0.218936	0.0768829	0.0191683
	ENSMUSG00000116438	predicted gene, 18911 [Source:MGI Symbol;Acc:MGI:5011096]	Gm18911	2.31301	2.17855	2.56669	1.68361	1.95114	1.06811		-0.669158	0.0768829	0.0191658
	ENSMUSG00000022018	regulator of cell cycle [Source:MGI Symbol;Acc:MGI:1913464]	Rgcc	32.9441	38.1764	38.4474	55.4642	47.4314	40.1172		0.282986	0.0769011	0.0191924
	ENSMUSG00000100210	H3 clustered histone 7 [Source:MGI Symbol;Acc:MGI:2448329]	H3c7	0.823847	0.543169	0.129282	0.0999445	1.71695	0.976461		1.87967	0.0769011	0.019184
	ENSMUSG00000024899	3'-phosphoadenosine 5'-phosphosulfate synthase 2 [Source:MGI Symbol;Acc:MGI:1330223]	Papss2	1.36494	0.859008	1.57723	0.13548	0.93743	0.691903		-0.942655	0.0769937	0.0192254
	ENSMUSG00000039377	H2.0-like homeobox [Source:MGI Symbol;Acc:MGI:96109]	Hlx	6.33396	10.3733	9.05291	2.76624	6.07218	6.732		-0.539248	0.0770371	0.019246
	ENSMUSG00000029635	cyclin-dependent kinase 8 [Source:MGI Symbol;Acc:MGI:1196224]	Cdk8	27.437	26.0311	26.7368	22.7269	24.5898	24.0566		-0.127019	0.0771089	3.21069
	ENSMUSG00000026482	ral guanine nucleotide dissociation stimulator,-like 1 [Source:MGI Symbol;Acc:MGI:107484]	Rgl1	0.183833	0.247914	0.377644	0.364934	0.557264	0.469987		0.73618	0.0771089	0.0192785
	ENSMUSG00000037788	vesicular, overexpressed in cancer, prosurvival protein 1 [Source:MGI Symbol;Acc:MGI:2141658]	Vopp1	15.8318	15.1456	15.5704	17.1573	17.1954	16.0823		0.122708	0.0772467	0.019328
	ENSMUSG00000029730	minichromosome maintenance complex component 7 [Source:MGI Symbol;Acc:MGI:1298398]	Mcm7	234.199	244.019	256.967	331.021	261.761	261.205		0.123024	0.0772842	0.0193472
	ENSMUSG00000100801	predicted gene 15459 [Source:MGI Symbol;Acc:MGI:3705702]	Gm15459	25.5719	23.584	21.3754	25.9722	27.7621	23.8755		0.211224	0.0774384	0.0193957
	ENSMUSG00000038406	SR-related CTD-associated factor 1 [Source:MGI Symbol;Acc:MGI:2141980]	Scaf1	58.4353	57.232	62.433	62.2074	55.2932	52.137		-0.127705	0.0774699	0.0194202
	ENSMUSG00000027646	Rous sarcoma oncogene [Source:MGI Symbol;Acc:MGI:98397]	Src	0.792245	0.365634	0.671341	0.89383	0.880582	0.99876		0.6219	0.0774699	0.0194234
	ENSMUSG00000071303	ribosomal protein S8, pseudogene 1 [Source:MGI Symbol;Acc:MGI:3647445]	Rps8-ps1	3.5147	2.74414	2.87382	4.64534	5.78279	3.58775		0.645916	0.077494	0.0194393
	ENSMUSG00000059751	ribosomal protein S3A3 [Source:MGI Symbol;Acc:MGI:3643406]	Rps3a3	13.358	10.6258	9.22777	14.109	13.3142	13.0946		0.398865	0.0776051	0.019487
	ENSMUSG00000087647	predicted gene 15407 [Source:MGI Symbol;Acc:MGI:3705245]	Gm15407	7.10059	7.38233	5.78555	3.77692	3.22523	5.12019		-0.625321	0.0776051	0.0194832
	ENSMUSG00000026728	vimentin [Source:MGI Symbol;Acc:MGI:98932]	Vim	2155.38	2189.59	2339.17	2464.45	2440.46	2352.99		0.106722	0.0776493	0.019508
	ENSMUSG00000028522	MEIR1 treanscription regulator [Source:MGI Symbol;Acc:MGI:1918398]	Mier1	47.9322	43.024	46.8109	57.7424	50.043	47.1977		0.118641	0.0778029	0.0195572
	ENSMUSG00000058729	lin-9 homolog (C. elegans) [Source:MGI Symbol;Acc:MGI:1919818]	Lin9	13.3851	13.127	13.8516	14.4402	15.0103	14.5408		0.135506	0.0778029	0.0195665
	ENSMUSG00000024381	bridging integrator 1 [Source:MGI Symbol;Acc:MGI:108092]	Bin1	83.131	83.2116	82.2248	71.4486	73.2443	76.9183		-0.130011	0.0779191	0.0196099
	ENSMUSG00000039414	HEAT repeat containing 5B [Source:MGI Symbol;Acc:MGI:2444098]	Heatr5b	21.0579	19.317	21.0138	17.3787	17.8076	19.2293		-0.149595	0.0779191	0.0196345
	ENSMUSG00000063849	phosphopantothenoylcysteine decarboxylase [Source:MGI Symbol;Acc:MGI:1914062]	Ppcdc	20.5479	17.2326	19.5668	19.7852	16.2711	16.049		-0.203666	0.0779191	0.0196338
	ENSMUSG00000034853	acyl-CoA thioesterase 11 [Source:MGI Symbol;Acc:MGI:1913736]	Acot11	10.6929	8.68988	9.90635	7.82485	8.32202	8.26226		-0.227526	0.0779191	0.0196355
	ENSMUSG00000079339	interferon induced protein with tetratricpeptide repeats 1B like 1 [Source:MGI Symbol;Acc:MGI:3650685]	Ifit1bl1	3.67742	2.82864	4.47234	8.25329	6.28021	5.69596		0.674084	0.0779265	0.0196505
	ENSMUSG00000058581	predicted pseudogene 5801 [Source:MGI Symbol;Acc:MGI:3646055]	Gm5801	1.33189	1.75625	1.46304	1.13104	0.61683	0.861061		-0.882274	0.0779265	0.0196573
	ENSMUSG00000026080	carbohydrate sulfotransferase 10 [Source:MGI Symbol;Acc:MGI:2138283]	Chst10	4.67934	4.52273	5.27334	5.83589	5.89144	5.4079		0.20398	0.0779322	0.0196686
	ENSMUSG00000018476	KDM1 lysine (K)-specific demethylase 6B [Source:MGI Symbol;Acc:MGI:2448492]	Kdm6b	32.7998	39.1519	36.4659	27.9281	32.7947	30.8256		-0.187605	0.0779435	0.0196815
	ENSMUSG00000009535	RNA (guanine-7-) methyltransferase [Source:MGI Symbol;Acc:MGI:1915147]	Rnmt	29.7737	30.005	30.2768	34.1736	33.1558	30.871		0.116279	0.0783317	0.0198095
	ENSMUSG00000040717	interleukin 17 receptor D [Source:MGI Symbol;Acc:MGI:2159727]	Il17rd	0.577939	0.550776	0.422957	0.206513	0.339439	0.315892		-0.567222	0.0783317	0.0198012
	ENSMUSG00000021782	discs large MAGUK scaffold protein 5 [Source:MGI Symbol;Acc:MGI:1918478]	Dlg5	0.0951609	0.0403331	0.0959981	0.133585	0.212487	0.118648		0.961665	0.0783317	0.0198019
	ENSMUSG00000017291	TAO kinase 1 [Source:MGI Symbol;Acc:MGI:1914490]	Taok1	25.1937	22.5904	23.0932	23.1442	21.7885	20.4482		-0.117437	0.0783713	0.0198295
	ENSMUSG00000023206	interleukin 15 receptor, alpha chain [Source:MGI Symbol;Acc:MGI:104644]	Il15ra	15.7334	17.6652	16.9404	17.0648	15.2584	13.9482		-0.164975	0.0784593	0.0198618
	ENSMUSG00000094966	T cell receptor alpha variable 9-2 [Source:MGI Symbol;Acc:MGI:4439903]	Trav9-2	4.30557	3.44698	3.04041	7.38719	4.27289	5.7659		0.629843	0.0785736	0.0199007
	ENSMUSG00000078695	CDGSH iron sulfur domain 3 [Source:MGI Symbol;Acc:MGI:101788]	Cisd3	133.444	119.364	115.663	88.5085	105.987	104.681		-0.192299	0.0786065	0.0199212
	ENSMUSG00000043909	transformation related protein 53 binding protein 1 [Source:MGI Symbol;Acc:MGI:1351320]	Trp53bp1	15.3374	14.3541	14.8936	13.9964	13.8251	13.0478		-0.121065	0.0786065	0.0199291
	ENSMUSG00000039633	LON peptidase N-terminal domain and ring finger 1 [Source:MGI Symbol;Acc:MGI:3609241]	Lonrf1	5.25751	5.66423	5.64154	6.47788	7.80455	6.20928		0.335169	0.0786087	0.0199397
	ENSMUSG00000032312	c-src tyrosine kinase [Source:MGI Symbol;Acc:MGI:88537]	Csk	264.189	269.246	282.947	356.574	294.316	286.51		0.123319	0.0786127	0.0199608
	ENSMUSG00000035621	midnolin [Source:MGI Symbol;Acc:MGI:1890222]	Midn	103.37	110.392	105.793	94.4567	98.9457	93.8491		-0.126119	0.0786127	0.0199526
	ENSMUSG00000017404	ribosomal protein L19 [Source:MGI Symbol;Acc:MGI:98020]	Rpl19	1071.17	1170.6	1076.72	1166.58	1226.59	1191.45		0.152182	0.0786694	0.0200513
	ENSMUSG00000004837	GRB2-related adaptor protein [Source:MGI Symbol;Acc:MGI:1918770]	Grap	124.121	127.908	127.064	160.402	136.986	132.041		0.12997	0.0786694	0.0200247
	ENSMUSG00000084416	ribosomal protein L10A, pseudogene 1 [Source:MGI Symbol;Acc:MGI:3705885]	Rpl10a-ps1	93.1913	109.792	85.5004	119.863	106.856	113.992		0.295471	0.0786694	0.02004
	ENSMUSG00000036093	ADP-ribosylation factor-like 5A [Source:MGI Symbol;Acc:MGI:1922673]	Arl5a	89.3522	83.955	88.8962	108.089	93.3747	93.9128		0.130052	0.0786694	0.0200155
	ENSMUSG00000005161	peroxiredoxin 2 [Source:MGI Symbol;Acc:MGI:109486]	Prdx2	78.1519	87.0954	80.3628	96.4853	94.2143	85.4399		0.170935	0.0786694	0.0200005
	ENSMUSG00000079845	X-linked lymphocyte-regulated 4A [Source:MGI Symbol;Acc:MGI:3574098]	Xlr4a	45.4201	41.0515	46.3583	38.7532	42.3142	36.4619		-0.175715	0.0786694	0.0200585
	ENSMUSG00000059586	NSE2/MMS21 homolog, SMC5-SMC6 complex SUMO ligase [Source:MGI Symbol;Acc:MGI:1915751]	Nsmce2	35.466	35.6608	34.698	40.5885	36.557	39.4657		0.140656	0.0786694	0.020038
	ENSMUSG00000032228	transcription factor 12 [Source:MGI Symbol;Acc:MGI:101877]	Tcf12	23.6078	24.0383	24.5549	28.9328	25.3824	26.0581		0.119249	0.0786694	0.0200756
[truncated: 11,950 more rows]
