# Supplementary material for: PIM kinase control of CD8 T cell protein synthesis and cell trafficking
Source: eLife. 2025 May 13;13:RP98622. doi: 10.7554/eLife.98622 (PMC12074636; doi:10.7554/eLife.98622)
Supplement: Supplementary file 7. [file elife-98622-supp7.xlsx]

## Sheet: Sheet1
Day 6, IL2 expanded CD8 T cells, RNAseq proteomics data combined				RNASEQ DATA														Proteomics data filtered for proteins that have >=2 peptides in at least two bio reps of one condition				PROTEOMICS DATA
				mRNA EXPRESSION - TRANSCRIPT PER MILLION (TPM)							AVERAGE TPM			DE ANALYSIS								PROTEIN EXPRESSSION - ESTIMATED COPY NUMBER PER CELL							AVERAGE COPIES			DE ANALYSIS
				WT			Pim dKO				WT	Pim dKO		Pim dKO / WT								WT			Pim dKO				WT	Pim dKO		Pim dKO / WT
	ensembl_gene_id	description	mgi_symbol	BR1	BR2	BR3	BR1	BR2	BR3					Fold-change (log2)	q-value	p-value (unadjusted)		Protein_Group_IDs (uniprot)	Protein description	Protein names	Gene names	BR1	BR2	BR3	BR1	BR2	BR3					log2(fold-change)	q value	p-value (unadjusted)
	ENSMUSG00000036678	achalasia, adrenocortical insufficiency, alacrimia [Source:MGI Symbol;Acc:MGI:2443767]	Aaas	115.9	110.2	113.5	126.3	114.3	103.7		113.2	114.767		-0.016128	0.485903	0.145866		P58742	Aladin	AAAS_MOUSE	Aaas	54312	41842	33383	26148	32029	31265		43179	29814		-0.51157	0.0310576	0.0389975
	ENSMUSG00000029482	acetoacetyl-CoA synthetase [Source:MGI Symbol;Acc:MGI:1926144]	Aacs	122.9	130	136	122.4	124.9	125.2		129.633	124.167		-0.0595642	0.37911	0.369469		Q9D2R0	Acetoacetyl-CoA synthetase	AACS_MOUSE	Aacs	75905	77939	73943	52241	64387	67662		75929	61430		-0.314219	0.0301041	0.0357876
	ENSMUSG00000037257	alpha- and gamma-adaptin binding protein [Source:MGI Symbol;Acc:MGI:1914189]	Aagab	28.5	28.8	31	29.4	28.2	30.5		29.4333	29.3667		-0.0156545	0.501685	0.113469		Q8R2R3	Alpha- and gamma-adaptin-binding protein p34	AAGAB_MOUSE	Aagab	8487	9028	7486	4792	6555	7050		8333.67	6132.33		-0.45767	0.0298654	0.034643
	ENSMUSG00000057230	AP2 associated kinase 1 [Source:MGI Symbol;Acc:MGI:1098687]	Aak1	28.6	26.2	28.7	30.6	27.7	26.9		27.8333	28.4		-0.00626967	0.536045	0.0465819		Q3UHJ0	AP2-associated protein kinase 1	AAK1_MOUSE	Aak1	28551	28695	31178	23635	27044	28670		29474.7	26449.7		-0.159698	0.0691849	0.164749
	ENSMUSG00000035642	adipogenesis associated Mth938 domain containing [Source:MGI Symbol;Acc:MGI:1913523]	Aamdc	3.4	3.7	3.8	4.3	3.8	4		3.63333	4.03333		0.107517	0.330574	0.489036		Q8R0P4	Mth938 domain-containing protein	AAMDC_MOUSE	Aamdc	5046	3989	5882	6099	5213	4747		4972.33	5353		0.116743	0.161259	0.523461
	ENSMUSG00000006299	angio-associated migratory protein [Source:MGI Symbol;Acc:MGI:107809]	Aamp	76.7	76.6	77.1	84.7	74.3	74.2		76.8	77.7333		-0.0150028	0.485449	0.146579		J3QN89;Q3TJ22	Angio-associated migratory protein	J3QN89_MOUSE;Q3TJ22_MOUSE	Aamp	9113	9183	8673	6538	7715	7305		8989.67	7186		-0.326008	0.0279451	0.0115619
	ENSMUSG00000027628	AAR2 splicing factor homolog [Source:MGI Symbol;Acc:MGI:1915545]	Aar2	29.3	32.7	31.5	35.5	30.9	29.3		31.1667	31.9		-0.0142166	0.515977	0.0853573		Q9D2V5	Protein AAR2 homolog	AAR2_MOUSE	Aar2	3359	6146	7983	2065	8286	7722		5829.33	6024.33		-0.106273	0.237353	0.868867
	ENSMUSG00000031960	alanyl-tRNA synthetase [Source:MGI Symbol;Acc:MGI:2384560]	Aars	103.5	107.7	107.5	88.9	100.6	98		106.233	95.8333		-0.100942	0.159258	1.10268		Q8BGQ7	Alanine--tRNA ligase, cytoplasmic	SYAC_MOUSE	Aars1	155653	163450	169049	100395	136690	135400		162717	124162		-0.4036	0.0287318	0.0280389
	ENSMUSG00000023938	alanyl-tRNA synthetase 2, mitochondrial [Source:MGI Symbol;Acc:MGI:2681839]	Aars2	8.9	7.3	8.9	8.8	7	7.5		8.36667	7.76667		-0.197166	0.191262	0.947208		Q14CH7	Alanine--tRNA ligase, mitochondrial	SYAM_MOUSE	Aars2	5688	1218	7856	5462	716	7049		4920.67	4409		-0.327117	0.218054	0.774813
	ENSMUSG00000075528	alanyl-tRNA synthetase domain containing 1 [Source:MGI Symbol;Acc:MGI:1916934]	Aarsd1	1.1	1.1	0.9	1.3	0.9	0.9		1.03333	1.03333		0.0637982	0.503717	0.108682		Q3THG9	Alanyl-tRNA editing protein Aarsd1	AASD1_MOUSE	Aarsd1	53183	42249	42484	32643	37040	38193		45972	35958.7		-0.349212	0.0291707	0.031868
	ENSMUSG00000025894	aminoadipate-semialdehyde dehydrogenase-phosphopantetheinyl transferase [Source:MGI Symbol;Acc:MGI:1914868]	Aasdhppt	32.8	33.5	32.5	34.5	31.5	34.2		32.9333	33.4		0.0257721	0.488725	0.139085		Q9CQF6	L-aminoadipate-semialdehyde dehydrogenase-phosphopantetheinyl transferase	ADPPT_MOUSE	Aasdhppt	3823	4118	3518	2514	2915	2609		3819.67	2679.33		-0.511476	0.0279451	0.00228331
	ENSMUSG00000018697	apoptosis antagonizing transcription factor [Source:MGI Symbol;Acc:MGI:1929608]	Aatf	75	75	76.4	76.3	77.6	73.3		75.4667	75.7333		0.0136218	0.498223	0.122518		Q9JKX4	Protein AATF	AATF_MOUSE	Aatf	23448	23126	24259	21354	23743	21117		23611	22071.3		-0.0990291	0.0981341	0.272543
	ENSMUSG00000035722	ATP-binding cassette, sub-family A (ABC1), member 7 [Source:MGI Symbol;Acc:MGI:1351646]	Abca7	28.7	25.6	27.6	26.1	24.1	21.5		27.3	23.9		-0.224913	0.0327374	2.41198		Q91V24	ATP-binding cassette sub-family A member 7	ABCA7_MOUSE	Abca7	19	13	18	15	18	40		16.6667	24.3333		0.426817	0.108804	0.313379
	ENSMUSG00000031974	ATP-binding cassette, sub-family B (MDR/TAP), member 10 [Source:MGI Symbol;Acc:MGI:1860508]	Abcb10	17.3	19	17.2	14.1	16.9	16.7		17.8333	15.9		-0.0714185	0.344083	0.455294		Q9JI39	ATP-binding cassette sub-family B member 10, mitochondrial	ABCBA_MOUSE	Abcb10	640	742	838	1011	686	629		740	775.333		0.0441795	0.230677	0.837607
	ENSMUSG00000040584	ATP-binding cassette, sub-family B (MDR/TAP), member 1A [Source:MGI Symbol;Acc:MGI:97570]	Abcb1a	9.1	8.4	8.6	8.5	8.9	8.6		8.7	8.66667		0.0296054	0.501861	0.11317		P21447	ATP-dependent translocase ABCB1	MDR1A_MOUSE	Abcb1a	9988	9346	9577	7812	8838	8497		9637	8382.33		-0.202584	0.0342882	0.0502331
	ENSMUSG00000028970	ATP-binding cassette, sub-family B (MDR/TAP), member 1B [Source:MGI Symbol;Acc:MGI:97568]	Abcb1b	26.6	23.5	26.4	29.1	24.8	25.6		25.5	26.5		0.00871124	0.52931	0.0604157		P06795	ATP-dependent translocase ABCB1	MDR1B_MOUSE	Abcb1b	3277	2975	2060	2766	2744	2581		2770.67	2697		-0.011966	0.2539	0.949632
	ENSMUSG00000031333	ATP-binding cassette, sub-family B (MDR/TAP), member 7 [Source:MGI Symbol;Acc:MGI:109533]	Abcb7	47.2	46.9	48.2	54.3	49.6	48.6		47.4333	50.8333		0.0744616	0.204722	0.884423		Q61102	ATP-binding cassette sub-family B member 7, mitochondrial	ABCB7_MOUSE	Abcb7	16583	15654	15383	12395	14599	14507		15873.3	13833.7		-0.201732	0.0436884	0.0802991
	ENSMUSG00000028973	ATP-binding cassette, sub-family B (MDR/TAP), member 8 [Source:MGI Symbol;Acc:MGI:1351667]	Abcb8	23.8	22	22	22.8	21.7	20.2		22.6	21.5667		-0.062161	0.322005	0.511597		Q9CXJ4	Mitochondrial potassium channel ATP-binding subunit	MITOS_MOUSE	Abcb8	17054	14514	15196	11605	12657	13008		15588	12423.3		-0.325722	0.0279451	0.0151383
	ENSMUSG00000029408	ATP-binding cassette, sub-family B (MDR/TAP), member 9 [Source:MGI Symbol;Acc:MGI:1861729]	Abcb9	87.3	95.3	92.6	83.2	78.7	81.1		91.7333	81		-0.181797	0.0228529	2.69553		Q9JJ59;Q9JJ59-2	ATP-binding cassette sub-family B member 9;Isoform 2 of ATP-binding cassette sub-family B member 9	ABCB9_MOUSE	Abcb9	170	366	339	188	281	278		291.667	249		-0.174092	0.183557	0.621066
	ENSMUSG00000023088	ATP-binding cassette, sub-family C (CFTR/MRP), member 1 [Source:MGI Symbol;Acc:MGI:102676]	Abcc1	23.2	23.1	23.9	18.6	20.3	19.8		23.4	19.5667		-0.219821	0.00395906	4.06592		O35379	Multidrug resistance-associated protein 1	MRP1_MOUSE	Abcc1	4278	3248	3478	2478	3311	3458		3668	3082.33		-0.256122	0.0750086	0.185231
	ENSMUSG00000032849	ATP-binding cassette, sub-family C (CFTR/MRP), member 4 [Source:MGI Symbol;Acc:MGI:2443111]	Abcc4	18.4	16.6	19.2	19.7	17.8	17.3		18.0667	18.2667		-0.0381582	0.415151	0.290766		E9Q236;E9Q467	ATP-binding cassette, sub-family C (CFTR/MRP), member 4;ATP-binding cassette, sub-family C (CFTR/MRP), member 4	E9Q236_MOUSE;E9Q467_MOUSE	Abcc4	413	392	291	290	325	301		365.333	305.333		-0.243919	0.0666367	0.156163
	ENSMUSG00000031378	ATP-binding cassette, sub-family D (ALD), member 1 [Source:MGI Symbol;Acc:MGI:1349215]	Abcd1	22.8	22.6	22.1	27.9	23.7	21.4		22.5	24.3333		0.0607691	0.355708	0.425612		P48410	ATP-binding cassette sub-family D member 1	ABCD1_MOUSE	Abcd1	7871	6280	7358	6830	7679	6465		7169.67	6991.33		-0.0337236	0.220643	0.787569
	ENSMUSG00000028127	ATP-binding cassette, sub-family D (ALD), member 3 [Source:MGI Symbol;Acc:MGI:1349216]	Abcd3	11.1	10.9	11	11.4	10.6	10.1		11	10.7		-0.0599469	0.333507	0.481974		P55096	ATP-binding cassette sub-family D member 3	ABCD3_MOUSE	Abcd3	2456	2600	2206	1766	2165	2191		2420.67	2040.67		-0.249938	0.0447613	0.0837665
	ENSMUSG00000058355	ATP-binding cassette, sub-family E (OABP), member 1 [Source:MGI Symbol;Acc:MGI:1195458]	Abce1	260.3	249.7	259.6	241	256.5	252.3		256.533	249.933		-0.00673202	0.532167	0.0548524		P61222	ATP-binding cassette sub-family E member 1	ABCE1_MOUSE	Abce1	239023	242003	244525	171804	207895	199562		241850	193087		-0.329567	0.0279451	0.014047
	ENSMUSG00000038762	ATP-binding cassette, sub-family F (GCN20), member 1 [Source:MGI Symbol;Acc:MGI:1351658]	Abcf1	199	203.1	212.2	213	201.2	196.4		204.767	203.533		-0.0307419	0.381725	0.363395		Q6P542	ATP-binding cassette sub-family F member 1	ABCF1_MOUSE	Abcf1	105217	103443	113154	84788	97717	94491		107271	92332		-0.217876	0.0347546	0.0519633
	ENSMUSG00000028953	ATP-binding cassette, sub-family F (GCN20), member 2 [Source:MGI Symbol;Acc:MGI:1351657]	Abcf2	234.6	243.9	249.7	250.6	247.4	252.6		242.733	250.2		0.0467118	0.333208	0.482811		Q99LE6	ATP-binding cassette sub-family F member 2	ABCF2_MOUSE	Abcf2	129716	124409	139025	96634	118632	113102		131050	109456		-0.26369	0.0334807	0.0479133
	ENSMUSG00000003234	ATP-binding cassette, sub-family F (GCN20), member 3 [Source:MGI Symbol;Acc:MGI:1351656]	Abcf3	38.2	33.2	37.1	37.1	31.8	36.7		36.1667	35.2		-0.0650592	0.348622	0.44386		Q8K268	ATP-binding cassette sub-family F member 3	ABCF3_MOUSE	Abcf3	26952	26349	25647	20821	24327	23253		26316	22800.3		-0.209639	0.0358013	0.0548791
	ENSMUSG00000029299	ATP binding cassette subfamily G member 3 [Source:MGI Symbol;Acc:MGI:1351624]	Abcg3	7	5	5.2	10.8	6.5	6		5.73333	7.76667		0.28821	0.122922	1.32059		Q99P81	ATP-binding cassette sub-family G member 3	ABCG3_MOUSE	Abcg3	363	224	433	314	248	197		340	253		-0.399512	0.0838287	0.216843
	ENSMUSG00000033157	abhydrolase domain containing 10 [Source:MGI Symbol;Acc:MGI:2442422]	Abhd10	13.2	12.6	13.1	14.1	12.8	13.1		12.9667	13.3333		0.0221383	0.49072	0.135857		Q6PE15	Mycophenolic acid acyl-glucuronide esterase, mitochondrial	ABHDA_MOUSE	Abhd10	5099	3186	3998	3111	3625	3550		4094.33	3428.67		-0.232687	0.0924037	0.249948
	ENSMUSG00000040532	abhydrolase domain containing 11 [Source:MGI Symbol;Acc:MGI:1916008]	Abhd11	28.6	26.6	28.1	30.9	26.7	26.6		27.7667	28.0667		-0.0261303	0.476053	0.163485		Q8K4F5	Protein ABHD11	ABHDB_MOUSE	Abhd11	7973	6734	4957	4685	4894	5078		6554.67	4885.67		-0.397577	0.0402433	0.0687396
	ENSMUSG00000032046	abhydrolase domain containing 12 [Source:MGI Symbol;Acc:MGI:1923442]	Abhd12	42.9	44.2	46.1	43.8	44.3	45		44.4	44.3667		0.00505878	0.542866	0.0333525		Q99LR1	Lysophosphatidylserine lipase ABHD12	ABD12_MOUSE	Abhd12	11848	10411	8933	7157	7830	8470		10397.3	7819		-0.405008	0.0279451	0.0212119
	ENSMUSG00000040396	abhydrolase domain containing 13 [Source:MGI Symbol;Acc:MGI:1916154]	Abhd13	32.1	30.9	29.8	28.7	30.4	30.8		30.9333	29.9667		0.0114382	0.518348	0.0806144		Q80UX8	Protein ABHD13	ABHDD_MOUSE	Abhd13	1609	1554	1246	896	1006	1136		1469.67	1012.67		-0.535097	0.0279451	0.00915734
	ENSMUSG00000042073	abhydrolase domain containing 14b [Source:MGI Symbol;Acc:MGI:1923741]	Abhd14b	4.8	4.8	4.5	5.5	4.3	4.1		4.7	4.63333		-0.0766786	0.436031	0.243955		Q8VCR7	Protein ABHD14B	ABHEB_MOUSE	Abhd14b	3046	2446	1762	1985	2000	2121		2418	2035.33		-0.213557	0.112567	0.328655
	ENSMUSG00000000686	abhydrolase domain containing 15 [Source:MGI Symbol;Acc:MGI:1914727]	Abhd15	5.7	6.1	6.2	7.4	6.4	5.7		6	6.5		0.0386021	0.502204	0.111998		Q5F2F2	Protein ABHD15	ABH15_MOUSE	Abhd15	311	444	344	290	286	318		366.333	298		-0.282929	0.0509789	0.103136
	ENSMUSG00000007036	abhydrolase domain containing 16A [Source:MGI Symbol;Acc:MGI:99476]	Abhd16a	45.1	45.3	48.2	54.5	50.8	46.7		46.2	50.6667		0.090176	0.181543	0.992209		Q9Z1Q2	Phosphatidylserine lipase ABHD16A	ABHGA_MOUSE	Abhd16a	5137	5210	5383	4537	5216	5254		5243.33	5002.33		-0.0708404	0.145227	0.456861
	ENSMUSG00000003346	abhydrolase domain containing 17A [Source:MGI Symbol;Acc:MGI:106388]	Abhd17a	93.3	106	116.1	117	117.8	106.3		105.133	113.7		0.0687174	0.361606	0.410608		Q99JW1	Alpha/beta hydrolase domain-containing protein 17A	AB17A_MOUSE	Abhd17a	3591	3495	1425	1142	1039	1421		2837	1200.67		-1.13566	0.0283715	0.0246276
	ENSMUSG00000047368	abhydrolase domain containing 17B [Source:MGI Symbol;Acc:MGI:1917816]	Abhd17b	44.2	44.4	42.7	47.5	44.7	48.9		43.7667	47.0333		0.125143	0.115448	1.37392		Q7M759	Alpha/beta hydrolase domain-containing protein 17B	AB17B_MOUSE	Abhd17b	4333	3770	2636	1968	2417	2519		3579.67	2301.33		-0.615161	0.0283715	0.0253103
	ENSMUSG00000032540	abhydrolase domain containing 5 [Source:MGI Symbol;Acc:MGI:1914719]	Abhd5	16.8	16	15.6	11.1	14.4	13.6		16.1333	13.0333		-0.19922	0.0518673	2.03542		Q9DBL9;Q9DBL9-2	1-acylglycerol-3-phosphate O-acyltransferase ABHD5;Isoform 2 of 1-acylglycerol-3-phosphate O-acyltransferase ABHD5	ABHD5_MOUSE	Abhd5	930	1240	1249	560	973	1017		1139.67	850		-0.459362	0.0589841	0.130941
	ENSMUSG00000025277	abhydrolase domain containing 6 [Source:MGI Symbol;Acc:MGI:1913332]	Abhd6	5.5	3.5	4.4	2.6	3.4	4.8		4.46667	3.6		-0.163395	0.378852	0.370116		Q8R2Y0;Q8R2Y0-2	Monoacylglycerol lipase ABHD6;Isoform 2 of Monoacylglycerol lipase ABHD6	ABHD6_MOUSE	Abhd6	2165	1700	1288	925	1068	1529		1717.67	1174		-0.550003	0.0428327	0.0778243
	ENSMUSG00000058835	abl interactor 1 [Source:MGI Symbol;Acc:MGI:104913]	Abi1	111.3	119.8	115.4	115	118.3	110.3		115.5	114.533		0.00430549	0.541662	0.0358109		Q8CBW3;Q8CBW3-2;Q8CBW3-3;Q8CBW3-4	Abl interactor 1;Isoform 2 of Abl interactor 1;Isoform 3 of Abl interactor 1;Isoform 4 of Abl interactor 1	ABI1_MOUSE	Abi1	36362	37809	34658	32043	33495	35779		36276.3	33772.3		-0.103761	0.093682	0.25534
	ENSMUSG00000018381	ABI family member 3 [Source:MGI Symbol;Acc:MGI:1913860]	Abi3	61.3	56.6	61.8	51.6	54.4	62.1		59.9	56.0333		-0.059176	0.385077	0.355348		Q8BYZ1	ABI gene family member 3	ABI3_MOUSE	Abi3	32543	37846	32210	23672	29129	30311		34199.7	27704		-0.308173	0.03523	0.0532723
	ENSMUSG00000038827	actin binding transcription modulator [Source:MGI Symbol;Acc:MGI:2677850]	Abitram	25.5	21.2	23.4	20.7	23.5	23.3		23.3667	22.5		0.00968673	0.530115	0.0586526		Q80ZQ9	Protein Abitram	ABITM_MOUSE	Abitram	28290	26628	26570	20550	24775	23313		27162.7	22879.3		-0.251292	0.0316174	0.0405081
	ENSMUSG00000025085	actin-binding LIM protein 1 [Source:MGI Symbol;Acc:MGI:1194500]	Ablim1	188.5	165.7	188.5	210.4	174.2	188.6		180.9	191.067		0.0241634	0.471148	0.172612		Q8K4G5;Q8K4G5-2;Q8K4G5-3	Actin-binding LIM protein 1;Isoform 2 of Actin-binding LIM protein 1;Isoform 3 of Actin-binding LIM protein 1	ABLM1_MOUSE	Ablim1	19104	19762	19847	15927	18044	18073		19571	17348		-0.176232	0.0442951	0.0822147
	ENSMUSG00000017631	active BCR-related gene [Source:MGI Symbol;Acc:MGI:107771]	Abr	56.3	54.3	56.2	46.5	47.7	48.6		55.6	47.6		-0.200119	0.0135558	3.09812		Q5SSL4;Q5SSL4-2	Active breakpoint cluster region-related protein;Isoform 2 of Active breakpoint cluster region-related protein	ABR_MOUSE	Abr	31006	31385	35727	20359	28949	25912		32706	25073.3		-0.395612	0.0308984	0.0384839
	ENSMUSG00000078453	ABRA C-terminal like [Source:MGI Symbol;Acc:MGI:1920362]	Abracl	308.6	298	326.8	316.3	317.9	321.2		311.133	318.467		0.0323107	0.418226	0.284798		Q4KML4	Costars family protein ABRACL	ABRAL_MOUSE	Abracl	1318176	656574	549234	405840	467335	410589		841328	427921		-0.869929	0.0306353	0.0374824
	ENSMUSG00000035234	BRCA1 A complex subunit [Source:MGI Symbol;Acc:MGI:1917931]	Abraxas1	17.3	16.3	16.9	19.4	16.1	17.9		16.8333	17.8		0.0455	0.425899	0.266121		Q8BPZ8	BRCA1-A complex subunit Abraxas 1	ABRX1_MOUSE	Abraxas1	2625	9332	2764	2190	1679	2451		4907	2106.67		-0.969786	0.0520291	0.106714
	ENSMUSG00000030965	BRISC complex subunit [Source:MGI Symbol;Acc:MGI:1926116]	Abraxas2	13.8	14.2	13.8	14.4	12.5	13.3		13.9333	13.4		-0.0779875	0.223528	0.809095		Q3TCJ1	BRISC complex subunit Abraxas 2	ABRX2_MOUSE	Abraxas2	10519	10429	11085	8848	9907	10309		10677.7	9688		-0.142786	0.0677216	0.159857
	ENSMUSG00000036376	activator of basal transcription 1 [Source:MGI Symbol;Acc:MGI:1353636]	Abt1	17.7	19	19.7	18.2	19.5	19.7		18.8	19.1333		0.0437182	0.419787	0.280404		Q9QYL7	Activator of basal transcription 1	ABT1_MOUSE	Abt1	13802	13808	17541	13012	15670	15417		15050.3	14699.7		-0.0295809	0.230066	0.834128
	ENSMUSG00000036138	acetyl-Coenzyme A acyltransferase 1A [Source:MGI Symbol;Acc:MGI:2148491]	Acaa1a	21.1	20.9	23.4	23.9	22.9	21.1		21.8	22.6333		0.00510772	0.544997	0.0287034		Q921H8	3-ketoacyl-CoA thiolase A, peroxisomal	THIKA_MOUSE	Acaa1a	92591	84280	91665	75691	84001	82674		89512	80788.7		-0.148157	0.0591053	0.131424
	ENSMUSG00000036880	acetyl-Coenzyme A acyltransferase 2 (mitochondrial 3-oxoacyl-Coenzyme A thiolase) [Source:MGI Symbol;Acc:MGI:1098623]	Acaa2	65.9	72.5	69.5	96.9	81.2	77.5		69.3	85.2		0.240206	0.0133647	3.11478		Q8BWT1	3-ketoacyl-CoA thiolase, mitochondrial	THIM_MOUSE	Acaa2	117503	116924	119344	111018	110435	102704		117924	108052		-0.12697	0.0604926	0.135668
	ENSMUSG00000020532	acetyl-Coenzyme A carboxylase alpha [Source:MGI Symbol;Acc:MGI:108451]	Acaca	22	21.3	22.6	22.4	20.8	20.4		21.9667	21.2		-0.0738028	0.294076	0.586955		Q5SWU9;Q5SWU9-2	Acetyl-CoA carboxylase 1;Isoform 2 of Acetyl-CoA carboxylase 1	ACACA_MOUSE	Acaca	39245	37128	36665	28159	32680	32344		37679.3	31061		-0.281306	0.0279451	0.0215994
	ENSMUSG00000029456	acyl-Coenzyme A dehydrogenase family, member 10 [Source:MGI Symbol;Acc:MGI:1919235]	Acad10	1	1	0.7	1.1	0.7	1.1		0.9	0.966667		0.154814	0.41977	0.280466		Q8K370	Acyl-CoA dehydrogenase family member 10	ACD10_MOUSE	Acad10	135	96	88	109	83	69		106.333	87		-0.289821	0.0935304	0.254179
	ENSMUSG00000090150	acyl-Coenzyme A dehydrogenase family, member 11 [Source:MGI Symbol;Acc:MGI:2143169]	Acad11	3.4	3.3	3.1	2.9	2.8	2.8		3.26667	2.83333		-0.149161	0.237657	0.760754		Q80XL6	Acyl-CoA dehydrogenase family member 11	ACD11_MOUSE	Acad11	468	459	374	262	401	402		433.667	355		-0.309225	0.0712938	0.172521
	ENSMUSG00000031969	acyl-Coenzyme A dehydrogenase family, member 8 [Source:MGI Symbol;Acc:MGI:1914198]	Acad8	10.8	9.6	9.9	10.4	9.2	8.9		10.1	9.5		-0.104856	0.271407	0.65408		Q9D7B6	Isobutyryl-CoA dehydrogenase, mitochondrial	ACAD8_MOUSE	Acad8	4897	4551	3554	4935	4843	4770		4334	4849.33		0.175138	0.0890052	0.236515
	ENSMUSG00000027710	acyl-Coenzyme A dehydrogenase family, member 9 [Source:MGI Symbol;Acc:MGI:1914272]	Acad9	9.9	9.4	10.5	10.2	10.1	9.7		9.93333	10		-0.00952559	0.5331	0.0525626		Q8JZN5	Complex I assembly factor ACAD9, mitochondrial	ACAD9_MOUSE	Acad9	35305	32840	32886	29726	31311	32418		33677	31151.7		-0.112537	0.0795691	0.202158
	ENSMUSG00000026003	acyl-Coenzyme A dehydrogenase, long-chain [Source:MGI Symbol;Acc:MGI:87866]	Acadl	305.3	333.4	319.1	285.3	317.9	305.3		319.267	302.833		-0.0299167	0.42362	0.272158		P51174	Long-chain specific acyl-CoA dehydrogenase, mitochondrial	ACADL_MOUSE	Acadl	217438	213544	237169	168042	192368	181298		222717	180569		-0.303333	0.0279451	0.0150626
	ENSMUSG00000062908	acyl-Coenzyme A dehydrogenase, medium chain [Source:MGI Symbol;Acc:MGI:87867]	Acadm	17.7	17.4	18.3	22.1	18.4	19.1		17.8	19.8667		0.0964919	0.259265	0.691118		P45952	Medium-chain specific acyl-CoA dehydrogenase, mitochondrial	ACADM_MOUSE	Acadm	23405	23748	22052	22905	22546	23328		23068.3	22926.3		-0.00831187	0.24649	0.913195
	ENSMUSG00000029545	acyl-Coenzyme A dehydrogenase, short chain [Source:MGI Symbol;Acc:MGI:87868]	Acads	49.4	53.5	53.3	57.8	54	49.5		52.0667	53.7667		0.0119509	0.51798	0.0811996		Q07417	Short-chain specific acyl-CoA dehydrogenase, mitochondrial	ACADS_MOUSE	Acads	95908	93526	102913	86625	93709	90875		97449	90403		-0.107839	0.0862108	0.225302
	ENSMUSG00000030861	acyl-Coenzyme A dehydrogenase, short/branched chain [Source:MGI Symbol;Acc:MGI:1914135]	Acadsb	7.8	8.8	7.7	6.7	8.6	7.8		8.1	7.7		0.0335899	0.486569	0.144749		Q9DBL1	Short/branched chain specific acyl-CoA dehydrogenase, mitochondrial	ACDSB_MOUSE	Acadsb	9375	13779	6109	7125	10830	8703		9754.33	8886		-0.0775967	0.226377	0.815887
	ENSMUSG00000018574	acyl-Coenzyme A dehydrogenase, very long chain [Source:MGI Symbol;Acc:MGI:895149]	Acadvl	66.4	69.2	74.3	76	76.8	71.5		69.9667	74.7667		0.0759745	0.281761	0.623735		P50544	Very long-chain specific acyl-CoA dehydrogenase, mitochondrial	ACADV_MOUSE	Acadvl	60837	64978	68520	55551	64993	59635		64778.3	60059.7		-0.11039	0.102628	0.289135
	ENSMUSG00000001588	ArfGAP with coiled-coil, ankyrin repeat and PH domains 1 [Source:MGI Symbol;Acc:MGI:2388270]	Acap1	189.5	176.7	178.8	171.4	158.4	154.5		181.667	161.433		-0.176764	0.0277748	2.54566		Q8K2H4	Arf-GAP with coiled-coil, ANK repeat and PH domain-containing protein 1	ACAP1_MOUSE	Acap1	50294	47736	47142	36341	41757	40535		48390.7	39544.3		-0.293231	0.0279451	0.0149311
	ENSMUSG00000049076	ArfGAP with coiled-coil, ankyrin repeat and PH domains 2 [Source:MGI Symbol;Acc:MGI:1925868]	Acap2	33.1	30.1	33.3	33.5	34	30.3		32.1667	32.6		0.00974826	0.528386	0.062365		Q6ZQK5	Arf-GAP with coiled-coil, ANK repeat and PH domain-containing protein 2	ACAP2_MOUSE	Acap2	7552	6803	7346	5457	6305	5773		7233.67	5845		-0.308688	0.0279451	0.0148362
	ENSMUSG00000032047	acetyl-Coenzyme A acetyltransferase 1 [Source:MGI Symbol;Acc:MGI:87870]	Acat1	98.4	100.4	95.9	95.6	97.4	94		98.2333	95.6667		-0.00912624	0.521731	0.0740001		Q8QZT1	Acetyl-CoA acetyltransferase, mitochondrial	THIL_MOUSE	Acat1	192007	198539	195224	147273	179010	176130		195257	167471		-0.226846	0.0390204	0.0646237
	ENSMUSG00000023832	acetyl-Coenzyme A acetyltransferase 2 [Source:MGI Symbol;Acc:MGI:87871]	Acat2	55.4	55.9	57	58.5	57.2	54.5		56.1	56.7333		0.00910349	0.532167	0.0548746		Q8CAY6	Acetyl-CoA acetyltransferase, cytosolic	THIC_MOUSE	Acat2	88008	81149	82342	60417	72093	72287		83833	68265.7		-0.300429	0.0283715	0.0252261
	ENSMUSG00000026499	acyl-Coenzyme A binding domain containing 3 [Source:MGI Symbol;Acc:MGI:2181074]	Acbd3	32.7	32.4	33.9	29.3	31	32.1		33	30.8		-0.0713074	0.238092	0.759202		Q8BMP6	Golgi resident protein GCP60	GCP60_MOUSE	Acbd3	23280	42674	28401	20315	25897	40401		31451.7	28871		-0.136223	0.199226	0.689185
	ENSMUSG00000026781	acyl-Coenzyme A binding domain containing 5 [Source:MGI Symbol;Acc:MGI:1921409]	Acbd5	11.6	11.3	11.4	11.4	10.7	10.4		11.4333	10.8333		-0.0789042	0.203832	0.889282		Q5XG73;Q5XG73-2;Q5XG73-3	Acyl-CoA-binding domain-containing protein 5;Isoform 2 of Acyl-CoA-binding domain-containing protein 5;Isoform 3 of Acyl-CoA-binding domain-containing protein 5	ACBD5_MOUSE	Acbd5	503	546	577	411	678	500		542	529.667		-0.061893	0.213859	0.756159
	ENSMUSG00000033701	acyl-Coenzyme A binding domain containing 6 [Source:MGI Symbol;Acc:MGI:1919732]	Acbd6	19.3	19.2	20.1	19.2	20.3	19.6		19.5333	19.7		0.0281956	0.452831	0.208832		Q9D061	Acyl-CoA-binding domain-containing protein 6	ACBD6_MOUSE	Acbd6	4742	4497	4570	2931	3667	3192		4603	3263.33		-0.502066	0.0279451	0.00291634
	ENSMUSG00000038000	adrenocortical dysplasia [Source:MGI Symbol;Acc:MGI:87873]	Acd	39.6	39.9	40.1	38.3	37.9	35.2		39.8667	37.1333		-0.102543	0.163179	1.08414		Q5EE38	Adrenocortical dysplasia protein	ACD_MOUSE	Acd	6547	8699	5248	4721	5492	5412		6831.33	5208.33		-0.363622	0.0528849	0.109727
	ENSMUSG00000022185	apoptotic chromatin condensation inducer 1 [Source:MGI Symbol;Acc:MGI:1891824]	Acin1	102.9	99.2	99.6	103.7	96.7	93.8		100.567	98.0667		-0.0439048	0.321635	0.513091		Q9JIX8;Q9JIX8-4	Apoptotic chromatin condensation inducer in the nucleus;Isoform 4 of Apoptotic chromatin condensation inducer in the nucleus	ACINU_MOUSE	Acin1	49078	50884	51334	43959	47377	47518		50432	46284.7		-0.124461	0.06459	0.149315
	ENSMUSG00000020917	ATP citrate lyase [Source:MGI Symbol;Acc:MGI:103251]	Acly	330	351.8	345.5	333.7	343.9	326.6		342.433	334.733		-0.0175002	0.479327	0.158474		Q91V92	ATP-citrate synthase	ACLY_MOUSE	Acly	219979	218949	210363	145387	181914	182316		216430	169872		-0.357082	0.0279451	0.0192136
	ENSMUSG00000028405	aconitase 1 [Source:MGI Symbol;Acc:MGI:87879]	Aco1	43.4	43.3	43.4	36.5	41.2	40.8		43.3667	39.5		-0.0802419	0.20254	0.895105		P28271	Cytoplasmic aconitate hydratase	ACOC_MOUSE	Aco1	41461	41088	42013	26971	34515	36682		41520.7	32722.7		-0.355868	0.0296488	0.0338297
	ENSMUSG00000022477	aconitase 2, mitochondrial [Source:MGI Symbol;Acc:MGI:87880]	Aco2	316.2	313.5	333.4	341.1	329.2	326		321.033	332.1		0.0361224	0.335339	0.476983		Q99KI0	Aconitate hydratase, mitochondrial	ACON_MOUSE	Aco2	324329	323393	358152	287436	317310	300734		335291	301827		-0.151232	0.0573202	0.125132
	ENSMUSG00000034853	acyl-CoA thioesterase 11 [Source:MGI Symbol;Acc:MGI:1913736]	Acot11	10.7	8.7	9.9	7.8	8.3	8.3		9.76667	8.13333		-0.227526	0.0779191	1.70696		Q8VHQ9	Acyl-coenzyme A thioesterase 11	ACO11_MOUSE	Acot11	1703	1450	1426	777	1028	1236		1526.33	1013.67		-0.611533	0.0279451	0.0164663
	ENSMUSG00000006717	acyl-CoA thioesterase 13 [Source:MGI Symbol;Acc:MGI:1914084]	Acot13	55.2	60.8	61	56.1	59.7	56		59	57.2667		-0.0333061	0.486316	0.145126		Q9CQR4	Acyl-coenzyme A thioesterase 13	ACO13_MOUSE	Acot13	43342	44060	35334	31495	34809	39293		40912	35199		-0.215812	0.0651386	0.151205
	ENSMUSG00000021226	acyl-CoA thioesterase 2 [Source:MGI Symbol;Acc:MGI:2159605]	Acot2	5.6	8.4	6.5	6.1	7.9	5		6.83333	6.33333		-0.0484235	0.50453	0.107422		Q9QYR9	Acyl-coenzyme A thioesterase 2, mitochondrial	ACOT2_MOUSE	Acot2	9621	10433	6865	6065	7536	7341		8973	6980.67		-0.346082	0.0527836	0.109331
	ENSMUSG00000028937	acyl-CoA thioesterase 7 [Source:MGI Symbol;Acc:MGI:1917275]	Acot7	333.9	373.2	361	307.2	336.2	330.3		356.033	324.567		-0.0958433	0.20332	0.892024		Q91V12-2	Isoform A of Cytosolic acyl coenzyme A thioester hydrolase	BACH_MOUSE	Acot7	505296	489506	490312	327611	402117	410460		495038	380063		-0.388438	0.0279451	0.0118902
	ENSMUSG00000017307	acyl-CoA thioesterase 8 [Source:MGI Symbol;Acc:MGI:2158201]	Acot8	25.4	26.2	24.7	22.2	23	23		25.4333	22.7333		-0.114474	0.239111	0.756664		P58137	Acyl-coenzyme A thioesterase 8	ACOT8_MOUSE	Acot8	18550	19367	20170	13983	19158	16695		19362.3	16612		-0.232065	0.0571268	0.124428
	ENSMUSG00000025287	acyl-CoA thioesterase 9 [Source:MGI Symbol;Acc:MGI:1928939]	Acot9	62.1	67	63.4	56.7	61.6	60.5		64.1667	59.6		-0.0579569	0.349394	0.441908		Q9R0X4	Acyl-coenzyme A thioesterase 9, mitochondrial	ACOT9_MOUSE	Acot9	30674	26593	24871	21860	22019	22645		27379.3	22174.7		-0.298764	0.0283413	0.024408
	ENSMUSG00000029098	acyl-Coenzyme A oxidase 3, pristanoyl [Source:MGI Symbol;Acc:MGI:1933156]	Acox3	7.6	6.3	6.6	6.7	6.6	5.3		6.83333	6.2		-0.14685	0.222327	0.814442		Q9EPL9	Peroxisomal acyl-coenzyme A oxidase 3	ACOX3_MOUSE	Acox3	1812	1386	1908	1577	2093	2009		1702	1893		0.15622	0.130031	0.39464
	ENSMUSG00000044573	acid phosphatase 1, soluble [Source:MGI Symbol;Acc:MGI:87881]	Acp1	54.4	54.9	55.7	56	54.5	54.8		55	55.1		0.00612888	0.535272	0.0476379		Q9D358	Low molecular weight phosphotyrosine protein phosphatase	PPAC_MOUSE	Acp1	229977	213715	211333	160184	184051	187219		218342	177151		-0.304044	0.0279451	0.0180331
	ENSMUSG00000032561	acid phosphatase, prostate [Source:MGI Symbol;Acc:MGI:1928480]	Acpp	44.8	40.4	31.7	6.8	21.5	22.9		38.9667	17.0667		-0.850397	0.0225383	2.70407		Q8CE08;Q8CE08-2	Prostatic acid phosphatase;Isoform 2 of Prostatic acid phosphatase	PPAP_MOUSE	Acp3	8990	7543	5200	780	2618	3240		7244.33	2212.67		-1.91199	0.0279451	0.0144186
	ENSMUSG00000001348	acid phosphatase 5, tartrate resistant [Source:MGI Symbol;Acc:MGI:87883]	Acp5	69.3	78.8	81.1	67.5	73.5	71.3		76.4	70.7667		-0.0987266	0.250809	0.719505		Q05117	Tartrate-resistant acid phosphatase type 5	PPA5_MOUSE	Acp5	17402	20695	15344	9633	13398	15525		17813.7	12852		-0.487847	0.0362749	0.0563424
	ENSMUSG00000028093	acid phosphatase 6, lysophosphatidic [Source:MGI Symbol;Acc:MGI:1931010]	Acp6	6.8	6.6	6.5	7.1	5.5	5.4		6.63333	6		-0.218936	0.0768829	1.71742		Q8BP40	Lysophosphatidic acid phosphatase type 6	PPA6_MOUSE	Acp6	4766	3457	3575	3816	3918	3688		3932.67	3807.33		-0.0317419	0.228684	0.827239
	ENSMUSG00000076435	acyl-CoA synthetase family member 2 [Source:MGI Symbol;Acc:MGI:2388287]	Acsf2	14.4	14	12.7	15.8	14.1	13.7		13.7	14.5333		0.100791	0.333507	0.481878		Q8VCW8	Medium-chain acyl-CoA ligase ACSF2, mitochondrial	ACSF2_MOUSE	Acsf2	15006	15367	13819	11231	16220	15249		14730.7	14233.3		-0.0660178	0.198141	0.684415
	ENSMUSG00000015016	acyl-CoA synthetase family member 3 [Source:MGI Symbol;Acc:MGI:2182591]	Acsf3	15	16.3	16.6	18.4	18.4	16.8		15.9667	17.8667		0.14615	0.11211	1.39973		Q3URE1	Malonate--CoA ligase ACSF3, mitochondrial	ACSF3_MOUSE	Acsf3	5239	5277	5145	4611	4911	4589		5220.33	4703.67		-0.150968	0.0442951	0.082207
	ENSMUSG00000018796	acyl-CoA synthetase long-chain family member 1 [Source:MGI Symbol;Acc:MGI:102797]	Acsl1	9.3	9.4	8.8	8.9	9.2	8.1		9.16667	8.73333		-0.0341515	0.446335	0.221613		P41216	Long-chain-fatty-acid--CoA ligase 1	ACSL1_MOUSE	Acsl1	2205	1919	2288	1524	1921	1985		2137.33	1810		-0.245454	0.055256	0.118215
	ENSMUSG00000032883	acyl-CoA synthetase long-chain family member 3 [Source:MGI Symbol;Acc:MGI:1921455]	Acsl3	19.3	20.5	20.5	20.8	19.3	21.8		20.1	20.6333		0.0341935	0.488367	0.139991		Q9CZW4	Long-chain-fatty-acid--CoA ligase 3	ACSL3_MOUSE	Acsl3	4951	5097	5467	3534	4761	4332		5171.67	4209		-0.306839	0.0355273	0.0540915
	ENSMUSG00000031278	acyl-CoA synthetase long-chain family member 4 [Source:MGI Symbol;Acc:MGI:1354713]	Acsl4	183.7	188.7	193.4	153.2	179.1	178.9		188.6	170.4		-0.091564	0.172719	1.03515		Q9QUJ7;Q9QUJ7-2	Long-chain-fatty-acid--CoA ligase 4;Isoform Short of Long-chain-fatty-acid--CoA ligase 4	ACSL4_MOUSE	Acsl4	131290	130644	122521	73674	101472	96403		128152	90516.3		-0.514656	0.0279451	0.00965486
	ENSMUSG00000024981	acyl-CoA synthetase long-chain family member 5 [Source:MGI Symbol;Acc:MGI:1919129]	Acsl5	315	327	337.3	347	331.8	329.4		326.433	336.067		0.0279035	0.432257	0.251741		Q8JZR0	Long-chain-fatty-acid--CoA ligase 5	ACSL5_MOUSE	Acsl5	77359	75338	69768	55899	62132	62920		74155	60317		-0.298612	0.0279451	0.0148752
	ENSMUSG00000027452	acyl-CoA synthetase short-chain family member 1 [Source:MGI Symbol;Acc:MGI:1915988]	Acss1	4	3.7	3.9	9.5	5.8	5.1		3.86667	6.8		0.601411	0.0396627	2.26537		Q99NB1	Acetyl-coenzyme A synthetase 2-like, mitochondrial	ACS2L_MOUSE	Acss1	3468	2107	3640	4409	4324	3649		3071.67	4127.33		0.462362	0.0464899	0.0892164
	ENSMUSG00000027605	acyl-CoA synthetase short-chain family member 2 [Source:MGI Symbol;Acc:MGI:1890410]	Acss2	7	7.7	7.5	4.5	6.9	6.5		7.4	5.96667		-0.186168	0.136769	1.23227		Q9QXG4	Acetyl-coenzyme A synthetase, cytoplasmic	ACSA_MOUSE	Acss2	1835	1804	2738	903	1775	1891		2125.67	1523		-0.526779	0.0679726	0.160708
	ENSMUSG00000029580	actin, beta [Source:MGI Symbol;Acc:MGI:87904]	Actb	16104.5	16517.6	16426	13831.1	14693.2	14770.8		16349.4	14431.7		-0.144893	0.0744728	1.73933		P60710	Actin, cytoplasmic 1	ACTB_MOUSE	Actb	27050834	27331064	23277255	15057052	19257102	18889488		2.58864e+07	1.77345e+07		-0.550574	0.0279451	0.00553679
	ENSMUSG00000062825	actin, gamma, cytoplasmic 1 [Source:MGI Symbol;Acc:MGI:87906]	Actg1	1528	1667.9	1552.6	1197.4	1490.3	1373.2		1582.83	1353.63		-0.143779	0.103299	1.46639		P63260	Actin, cytoplasmic 2	ACTG_MOUSE	Actg1	1944867	3021471	2427709	1468085	2066047	1627016		2.46468e+06	1.72038e+06		-0.510494	0.0331533	0.0458832
	ENSMUSG00000027671	actin-like 6A [Source:MGI Symbol;Acc:MGI:1861453]	Actl6a	101.2	107.4	108.1	115.4	110.9	105.6		105.567	110.633		0.0525884	0.320232	0.516969		Q9Z2N8	Actin-like protein 6A	ACL6A_MOUSE	Actl6a	104903	101562	104173	95949	99347	93539		103546	96278.3		-0.10529	0.075847	0.189211
	ENSMUSG00000015143	actinin, alpha 1 [Source:MGI Symbol;Acc:MGI:2137706]	Actn1	7.6	8.4	8.2	7.5	7.2	7.4		8.06667	7.36667		-0.12607	0.317959	0.522262		Q7TPR4	Alpha-actinin-1	ACTN1_MOUSE	Actn1	239199	213222	233545	170554	187941	185209		228655	181235		-0.334869	0.0279451	0.00828662
	ENSMUSG00000054808	actinin alpha 4 [Source:MGI Symbol;Acc:MGI:1890773]	Actn4	311.5	324.5	330.9	340.6	324.9	321.3		322.3	328.933		0.016609	0.483033	0.150901		P57780	Alpha-actinin-4	ACTN4_MOUSE	Actn4	349171	342486	374827	259668	303644	300020		355495	287777		-0.307365	0.0279451	0.0180193
	ENSMUSG00000021076	ARP10 actin-related protein 10 [Source:MGI Symbol;Acc:MGI:1891654]	Actr10	37.3	40.6	39.4	33.6	38.4	38.4		39.1	36.8		-0.0323832	0.430222	0.257653		Q9QZB7	Actin-related protein 10	ARP10_MOUSE	Actr10	24477	22785	21559	15905	19681	17794		22940.3	17793.3		-0.370042	0.0279451	0.0140637
	ENSMUSG00000025228	ARP1 actin-related protein 1A, centractin alpha [Source:MGI Symbol;Acc:MGI:1858964]	Actr1a	133.6	137.2	132.8	131.2	133.5	127.1		134.533	130.6		-0.0214537	0.445381	0.223758		P61164	Alpha-centractin	ACTZ_MOUSE	Actr1a	61171	57765	56456	48312	51577	58782		58464	52890.3		-0.148562	0.0752543	0.186497
	ENSMUSG00000037351	ARP1 actin-related protein 1B, centractin beta [Source:MGI Symbol;Acc:MGI:1917446]	Actr1b	103.7	98.6	101.3	97.3	91.4	101.7		101.2	96.8		-0.054572	0.323992	0.507255		Q8R5C5	Beta-centractin	ACTY_MOUSE	Actr1b	88722	88384	83752	64060	74091	71379		86952.7	69843.3		-0.318326	0.0279451	0.0108348
	ENSMUSG00000020152	ARP2 actin-related protein 2 [Source:MGI Symbol;Acc:MGI:1913963]	Actr2	601.8	595.3	622.4	567.4	596.8	607.5		606.5	590.567		-0.0132564	0.505227	0.106172		P61161	Actin-related protein 2	ARP2_MOUSE	Actr2	715287	701376	758238	584992	639030	642347		724967	622123		-0.221236	0.0296904	0.0340437
	ENSMUSG00000026341	ARP3 actin-related protein 3 [Source:MGI Symbol;Acc:MGI:1921367]	Actr3	616.6	647.1	654.4	639.9	669.8	663.7		639.367	657.8		0.0615528	0.279982	0.629386		Q99JY9	Actin-related protein 3	ARP3_MOUSE	Actr3	1170505	1377809	1228085	949676	1070000	1100778		1.2588e+06	1.04015e+06		-0.274759	0.0305656	0.0372334
	ENSMUSG00000037761	ARP5 actin-related protein 5 [Source:MGI Symbol;Acc:MGI:1924748]	Actr5	16.3	15.9	15.9	18.3	15.5	13.7		16.0333	15.8333		-0.0783316	0.288733	0.6028		Q80US4	Actin-related protein 5	ARP5_MOUSE	Actr5	8748	10027	9658	6927	9698	8093		9477.67	8239.33		-0.213301	0.0741347	0.182058
	ENSMUSG00000019948	ARP6 actin-related protein 6 [Source:MGI Symbol;Acc:MGI:1914269]	Actr6	21.5	23.5	22.3	23.1	22.3	22.2		22.4333	22.5333		0.0165718	0.517452	0.082648		Q9D864	Actin-related protein 6	ARP6_MOUSE	Actr6	1933	1861	1526	1343	1506	1599		1773.33	1482.67		-0.254441	0.0461183	0.0881497
	ENSMUSG00000015971	ARP8 actin-related protein 8 [Source:MGI Symbol;Acc:MGI:1860775]	Actr8	12.4	11.1	10.8	11.4	10.8	10.4		11.4333	10.8667		-0.0443153	0.407685	0.307313		Q8R2S9	Actin-related protein 8	ARP8_MOUSE	Actr8	3260	2727	2625	2023	2476	2247		2870.67	2248.67		-0.350665	0.0289234	0.0303994
	ENSMUSG00000000530	activin A receptor, type II-like 1 [Source:MGI Symbol;Acc:MGI:1338946]	Acvrl1	50.7	67.1	52.2	6.4	27	35.8		56.6667	23.0667		-1.02899	0.0119047	3.21701		Q61288	Serine/threonine-protein kinase receptor R3	ACVL1_MOUSE	Acvrl1	10259	11416	9293	4015	9255	8346		10322.7	7205.33		-0.603743	0.0536256	0.112749
	ENSMUSG00000023262	aminoacylase 1 [Source:MGI Symbol;Acc:MGI:87913]	Acy1	10.3	9.7	10.1	9	9	8.7		10.0333	8.9		-0.15981	0.22379	0.80811		Q99JW2	Aminoacylase-1	ACY1_MOUSE	Acy1	4985	4732	4788	3478	4173	3816		4835	3822.33		-0.342688	0.0279451	0.0104484
	ENSMUSG00000008822	acylphosphatase 1, erythrocyte (common) type [Source:MGI Symbol;Acc:MGI:1913454]	Acyp1	7.3	9.2	8	9.6	7.6	8		8.16667	8.4		-0.000496229	0.560554	0.00128657		P56376	Acylphosphatase-1	ACYP1_MOUSE	Acyp1	50184	41125	55080	41766	51292	45545		48796.3	46201		-0.0734721	0.183446	0.620104
	ENSMUSG00000017697	adenosine deaminase [Source:MGI Symbol;Acc:MGI:87916]	Ada	41.3	43.3	43.4	48	45.7	49.5		42.6667	47.7333		0.163976	0.137991	1.22228		P03958	Adenosine deaminase	ADA_MOUSE	Ada	49297	48178	50867	41283	44673	45139		49447.3	43698.3		-0.179093	0.0373119	0.0593834
	ENSMUSG00000054693	a disintegrin and metallopeptidase domain 10 [Source:MGI Symbol;Acc:MGI:109548]	Adam10	119	120.7	130.3	134.6	127.8	128.9		123.333	130.433		0.0574143	0.309886	0.543609		O35598	Disintegrin and metalloproteinase domain-containing protein 10	ADA10_MOUSE	Adam10	12042	12286	13346	10317	11653	10822		12558	10930.7		-0.200602	0.0379072	0.0614105
	ENSMUSG00000052593	a disintegrin and metallopeptidase domain 17 [Source:MGI Symbol;Acc:MGI:1096335]	Adam17	43.3	41.1	42.8	40.7	42.3	41.2		42.4	41.4		-0.0121288	0.512645	0.0913066		Q9Z0F8;Q9Z0F8-2	Disintegrin and metalloproteinase domain-containing protein 17;Isoform Short of Disintegrin and metalloproteinase domain-containing protein 17	ADA17_MOUSE	Adam17	1936	1885	1857	1225	1545	1426		1892.67	1398.67		-0.442752	0.0279451	0.00577543
	ENSMUSG00000011256	a disintegrin and metallopeptidase domain 19 (meltrin beta) [Source:MGI Symbol;Acc:MGI:105377]	Adam19	226.7	198.3	228.7	200.9	194.7	206.8		217.9	200.8		-0.120726	0.15376	1.13385		O35674	Disintegrin and metalloproteinase domain-containing protein 19	ADA19_MOUSE	Adam19	3176	3261	3611	2162	2881	2756		3349.33	2599.67		-0.374471	0.0289943	0.0307293
	ENSMUSG00000025473	a disintegrin and metallopeptidase domain 8 [Source:MGI Symbol;Acc:MGI:107825]	Adam8	247.8	256.5	247.1	127.3	199.1	191.7		250.467	172.7		-0.395023	0.0736033	1.75039		Q05910	Disintegrin and metalloproteinase domain-containing protein 8	ADAM8_MOUSE	Adam8	9562	10356	10349	3077	6315	6982		10089	5458		-0.972393	0.0279451	0.0211251
	ENSMUSG00000056413	ArfGAP with dual PH domains 1 [Source:MGI Symbol;Acc:MGI:2442201]	Adap1	84.3	81.4	89.3	79.8	80.2	80.2		85	80.0667		-0.0886399	0.20958	0.864774		E9PY16	ArfGAP with dual PH domains 1	E9PY16_MOUSE	Adap1	16209	13315	12268	9791	11817	12068		13930.7	11225.3		-0.307723	0.0417465	0.073506
	ENSMUSG00000027951	adenosine deaminase, RNA-specific [Source:MGI Symbol;Acc:MGI:1889575]	Adar	56	54.7	55.1	59.6	50.2	51.6		55.2667	53.8		-0.0790299	0.170828	1.04639		Q99MU3-2	Isoform 2 of Double-stranded RNA-specific adenosine deaminase	DSRAD_MOUSE	Adar	8603	7559	7623	5989	6626	6562		7928.33	6392.33		-0.309602	0.0279451	0.0148597
	ENSMUSG00000031949	adenosine deaminase, tRNA-specific 1 [Source:MGI Symbol;Acc:MGI:1353631]	Adat1	5.9	4	5.2	5.8	3.3	4.6		5.03333	4.56667		-0.323707	0.13169	1.26387		Q9JHI2;Q9JHI2-2;Q9JHI2-3	tRNA-specific adenosine deaminase 1;Isoform 2 of tRNA-specific adenosine deaminase 1;Isoform 3 of tRNA-specific adenosine deaminase 1	ADAT1_MOUSE	Adat1	1152	1011	763	862	969	820		975.333	883.667		-0.125218	0.152303	0.486212
	ENSMUSG00000019808	adenosine deaminase, tRNA-specific 2 [Source:MGI Symbol;Acc:MGI:1914007]	Adat2	22.3	25.7	23.4	24.4	24.9	24.1		23.8	24.4667		0.0701947	0.382242	0.362611		Q6P6J0	tRNA-specific adenosine deaminase 2	ADAT2_MOUSE	Adat2	189914	168594	14741	6563	105226	4337		124416	38708.7		-2.43332	0.0692104	0.164923
	ENSMUSG00000021044	aarF domain containing kinase 1 [Source:MGI Symbol;Acc:MGI:1919363]	Adck1	11	11.6	11.2	9.5	11.1	10.3		11.2667	10.3		-0.0743492	0.305906	0.554359		Q9D0L4	AarF domain-containing protein kinase 1	ADCK1_MOUSE	Adck1	3130	1638	1471	1013	1286	1292		2079.67	1197		-0.721255	0.0355198	0.0540315
	ENSMUSG00000022550	aarF domain containing kinase 5 [Source:MGI Symbol;Acc:MGI:2679274]	Adck5	10.2	10.2	10.9	11.7	9.8	10.1		10.4333	10.5333		-0.0556479	0.419188	0.282079		Q80V03;Q80V03-2	Uncharacterized aarF domain-containing protein kinase 5;Isoform 2 of Uncharacterized aarF domain-containing protein kinase 5	ADCK5_MOUSE	Adck5	90	113	54	52	110	67		85.6667	76.3333		-0.17301	0.19214	0.658216
	ENSMUSG00000020654	adenylate cyclase 3 [Source:MGI Symbol;Acc:MGI:99675]	Adcy3	29.8	30.9	32.7	32.2	28.4	32		31.1333	30.8667		-0.0465415	0.403308	0.315818		Q8VHH7	Adenylate cyclase type 3	ADCY3_MOUSE	Adcy3	192	383	230	76	85	97		268.333	86		-1.58481	0.0279451	0.00102104
	ENSMUSG00000031659	adenylate cyclase 7 [Source:MGI Symbol;Acc:MGI:102891]	Adcy7	101.4	81.1	92.1	86.5	81.7	76.5		91.5333	81.5667		-0.175994	0.0663342	1.83042		P51829	Adenylate cyclase type 7	ADCY7_MOUSE	Adcy7	3185	2716	2440	1446	1919	2338		2780.33	1901		-0.56732	0.0288563	0.0296939
	ENSMUSG00000029106	adducin 1 (alpha) [Source:MGI Symbol;Acc:MGI:87918]	Add1	113.8	117.4	116.8	129.7	114.8	115.7		116	120.067		0.0206422	0.444462	0.225734		Q9QYC0	Alpha-adducin	ADDA_MOUSE	Add1	33974	34443	33082	31238	31968	31340		33833	31515.3		-0.102251	0.0758352	0.189048
	ENSMUSG00000025026	adducin 3 (gamma) [Source:MGI Symbol;Acc:MGI:1351615]	Add3	41.5	36.4	41.6	58.2	44.5	42.8		39.8333	48.5		0.173763	0.0571535	1.9572		Q9QYB5-2	Isoform 1 of Gamma-adducin	ADDG_MOUSE	Add3	27011	25556	29784	27749	27621	26378		27450.3	27249.3		-0.00807003	0.249949	0.929486
	ENSMUSG00000002885	adhesion G protein-coupled receptor E5 [Source:MGI Symbol;Acc:MGI:1347095]	Adgre5	39.6	27.9	32.9	85.5	42.4	43.1		33.4667	57		0.489429	0.014612	3.03027		Q9Z0M6;Q9Z0M6-3	Adhesion G protein-coupled receptor E5;Isoform 3 of Adhesion G protein-coupled receptor E5	AGRE5_MOUSE	Adgre5	4833	5556	4632	7297	5910	5039		5007	6082		0.268333	0.0615631	0.138845
	ENSMUSG00000028138	alcohol dehydrogenase 5 (class III), chi polypeptide [Source:MGI Symbol;Acc:MGI:87929]	Adh5	72.3	71.3	73.8	80.8	77.3	74.5		72.4667	77.5333		0.0852542	0.131261	1.26769		P28474	Alcohol dehydrogenase class-3	ADHX_MOUSE	Adh5	223356	222664	242975	197038	221309	202238		229665	206862		-0.151477	0.0580776	0.127994
	ENSMUSG00000020629	acireductone dioxygenase 1 [Source:MGI Symbol;Acc:MGI:2144929]	Adi1	40.8	39	39.7	51.5	44.8	41.5		39.8333	45.9333		0.160852	0.0906826	1.58078		Q99JT9	1,2-dihydroxy-3-keto-5-methylthiopentene dioxygenase	MTND_MOUSE	Adi1	13118	14438	14103	12548	13083	10333		13886.3	11988		-0.218337	0.0512953	0.10431
	ENSMUSG00000039197	adenosine kinase [Source:MGI Symbol;Acc:MGI:87930]	Adk	11.9	13.2	11.9	12.9	12.5	12.3		12.3333	12.5667		0.0511005	0.371394	0.386769		P55264	Adenosine kinase	ADK_MOUSE	Adk	49532	44986	49847	43565	46997	42083		48121.7	44215		-0.122123	0.0814982	0.208577
	ENSMUSG00000051149	activity-dependent neuroprotective protein [Source:MGI Symbol;Acc:MGI:1338758]	Adnp	1.4	1	0.9	1.3	0.9	0.6		1.1	0.933333		-0.359593	0.201671	0.898666		Q9Z103	Activity-dependent neuroprotector homeobox protein	ADNP_MOUSE	Adnp	14914	16029	17165	15160	16272	15934		16036	15788.7		-0.0206839	0.226789	0.818023
	ENSMUSG00000053950	ADNP homeobox 2 [Source:MGI Symbol;Acc:MGI:2448562]	Adnp2	28.2	25.7	27.5	30.8	26	28.6		27.1333	28.4667		0.033662	0.42518	0.267926		Q8CHC8	Activity-dependent neuroprotector homeobox protein 2	ADNP2_MOUSE	Adnp2	368	350	318	315	346	311		345.333	324		-0.0910163	0.122307	0.364997
	ENSMUSG00000057134	2-aminoethanethiol (cysteamine) dioxygenase [Source:MGI Symbol;Acc:MGI:2685083]	Ado	24.2	21.8	24.7	26.2	24.9	22.4		23.5667	24.5		0.0153886	0.507873	0.0996315		Q6PDY2	2-aminoethanethiol dioxygenase	AEDO_MOUSE	Ado	12030	13064	15326	12734	13135	12749		13473.3	12872.7		-0.0585762	0.180359	0.607286
	ENSMUSG00000025236	ADP-dependent glucokinase [Source:MGI Symbol;Acc:MGI:1919391]	Adpgk	21.3	18.4	19.5	20.4	17.5	17.6		19.7333	18.5		-0.12111	0.14985	1.15683		Q8VDL4;Q8VDL4-3	ADP-dependent glucokinase;Isoform 3 of ADP-dependent glucokinase	ADPGK_MOUSE	Adpgk	21646	20248	21358	15902	17873	17421		21084	17065.3		-0.30628	0.0279451	0.0100596
	ENSMUSG00000002844	ADP-ribosylarginine hydrolase [Source:MGI Symbol;Acc:MGI:1098234]	Adprh	71.5	79.6	77.2	92.9	78.4	81.8		76.1	84.3667		0.103353	0.157179	1.11433		P54923	[Protein ADP-ribosylarginine] hydrolase	ADPRH_MOUSE	Adprh	69336	74410	77775	72029	73748	72861		73840.3	72879.3		-0.0173597	0.229643	0.831715
	ENSMUSG00000020910	ADP-ribose/CDP-alcohol diphosphatase, manganese dependent [Source:MGI Symbol;Acc:MGI:1913608]	Adprm	25.2	25	23.8	25.4	24.9	24.9		24.6667	25.0667		0.0555163	0.382026	0.362955		Q99KS6;Q99KS6-2	Manganese-dependent ADP-ribose/CDP-alcohol diphosphatase;Isoform 2 of Manganese-dependent ADP-ribose/CDP-alcohol diphosphatase	ADPRM_MOUSE	Adprm	1082	1235	1058	740	868	807		1125	805		-0.482515	0.0279451	0.0034811
	ENSMUSG00000042558	ADP-ribosylserine hydrolase [Source:MGI Symbol;Acc:MGI:2140364]	Adprs	41.3	39.2	44.4	46.9	42.6	41.3		41.6333	43.6		0.012913	0.517759	0.0817318		Q8CG72	ADP-ribose glycohydrolase ARH3	ADPRS_MOUSE	Adprs	14675	15659	17533	14384	15654	15261		15955.7	15099.7		-0.0765266	0.144506	0.453881
	ENSMUSG00000039041	adhesion regulating molecule 1 [Source:MGI Symbol;Acc:MGI:1929289]	Adrm1	68.6	74.1	75.6	67.8	69.2	65.8		72.7667	67.6		-0.106152	0.179058	1.00457		Q9JKV1	Proteasomal ubiquitin receptor ADRM1	ADRM1_MOUSE	Adrm1	90289	100570	102331	75584	87288	86607		97730	83159.7		-0.233834	0.0358811	0.0550821
	ENSMUSG00000022407	adenylosuccinate lyase [Source:MGI Symbol;Acc:MGI:103202]	Adsl	83.2	85	87	92.4	89.2	87.6		85.0667	89.7333		0.0687108	0.224762	0.803941		P54822	Adenylosuccinate lyase	PUR8_MOUSE	Adsl	199031	168460	157097	128577	144736	146656		174863	139990		-0.316187	0.0301423	0.0360546
	ENSMUSG00000011148	adenylosuccinate synthetase like 1 [Source:MGI Symbol;Acc:MGI:87947]	Adssl1	7.8	7.2	8.7	6	7.8	7.1		7.9	6.96667		-0.138864	0.296411	0.580946		P28650;P28650-2	Adenylosuccinate synthetase isozyme 1;Isoform 2 of Adenylosuccinate synthetase isozyme 1	PURA1_MOUSE	Adss1	701	826	371	335	415	457		632.667	402.333		-0.585836	0.0535202	0.112378
	ENSMUSG00000015961	adenylosuccinate synthetase, non muscle [Source:MGI Symbol;Acc:MGI:87948]	Adss	104.3	104	109.7	122.4	117.5	111.6		106	117.167		0.124726	0.0564099	1.97057		P46664	Adenylosuccinate synthetase isozyme 2	PURA2_MOUSE	Adss2	197406	197083	232299	198989	207750	195940		208929	200893		-0.0526677	0.178843	0.600124
	ENSMUSG00000030232	AE binding protein 2 [Source:MGI Symbol;Acc:MGI:1338038]	Aebp2	96.1	85.1	91.3	96.8	90.4	92.2		90.8333	93.1333		0.0325517	0.384741	0.356782		Q9Z248;Q9Z248-2	Zinc finger protein AEBP2;Isoform 2 of Zinc finger protein AEBP2	AEBP2_MOUSE	Aebp2	24075	24550	28132	20345	23869	24354		25585.7	22856		-0.163833	0.0763593	0.19091
	ENSMUSG00000030609	apoptosis enhancing nuclease [Source:MGI Symbol;Acc:MGI:1915298]	Aen	64.7	59.7	65.9	62.5	60.4	59.6		63.4333	60.8333		-0.0726442	0.211881	0.852753		Q9CZI9	Apoptosis-enhancing nuclease	AEN_MOUSE	Aen	11011	10156	10911	6206	8245	8255		10692.7	7568.67		-0.510131	0.0279451	0.00894212
	ENSMUSG00000068036	afadin, adherens junction formation factor [Source:MGI Symbol;Acc:MGI:1314653]	Afdn	3.7	2.9	3.1	4.2	3.9	3.3		3.23333	3.8		0.234208	0.125096	1.30408		Q9QZQ1;Q9QZQ1-2	Afadin;Isoform 1 of Afadin	AFAD_MOUSE	Afdn	202	128	66	455	89	110		132	218		0.461403	0.166031	0.544767
	ENSMUSG00000031967	AFG3-like AAA ATPase 1 [Source:MGI Symbol;Acc:MGI:1928277]	Afg3l1	76.3	71.2	76.5	69.4	71.2	71.4		74.6667	70.6667		-0.0628285	0.231146	0.78182		Q920A7	AFG3-like protein 1	AFG31_MOUSE	Afg3l1	10352	8763	9051	7159	7822	7289		9388.67	7423.33		-0.336108	0.0279451	0.0126448
	ENSMUSG00000024527	AFG3-like AAA ATPase 2 [Source:MGI Symbol;Acc:MGI:1916847]	Afg3l2	45.2	45.7	45.8	40	43.9	40.8		45.5667	41.5667		-0.0971712	0.100814	1.48846		Q8JZQ2	AFG3-like protein 2	AFG32_MOUSE	Afg3l2	31009	32877	34372	27532	28217	26821		32752.7	27523.3		-0.249987	0.0279451	0.0182445
	ENSMUSG00000017718	arylformamidase [Source:MGI Symbol;Acc:MGI:2448704]	Afmid	4.8	4.7	5	4.8	4.3	4.2		4.83333	4.43333		-0.153684	0.227321	0.79534		Q8K4H1	Kynurenine formamidase	KFA_MOUSE	Afmid	942	945	936	802	871	867		941	846.667		-0.153414	0.044927	0.0842732
	ENSMUSG00000049659	aftiphilin [Source:MGI Symbol;Acc:MGI:1923012]	Aftph	54.1	48.8	51.1	46.9	46.4	49.4		51.3333	47.5667		-0.0826008	0.222191	0.814989		Q80WT5;Q80WT5-2	Aftiphilin;Isoform 2 of Aftiphilin	AFTIN_MOUSE	Aftph	3150	2901	12988	10071	11119	10661		6346.33	10617		1.11012	0.0511961	0.103829
	ENSMUSG00000031521	aspartylglucosaminidase [Source:MGI Symbol;Acc:MGI:104873]	Aga	21.5	19.8	20.7	19.5	21	18.5		20.6667	19.6667		-0.0433128	0.434852	0.245834		Q64191	N(4)-(beta-N-acetylglucosaminyl)-L-asparaginase	ASPG_MOUSE	Aga	1955	2245	1936	1710	1783	1583		2045.33	1692		-0.272	0.0289943	0.0308653
	ENSMUSG00000025422	ArfGAP with GTPase domain, ankyrin repeat and PH domain 2 [Source:MGI Symbol;Acc:MGI:3580016]	Agap2	82.4	76.5	82.3	84.3	75.5	74.5		80.4	78.1		-0.07589	0.233288	0.776089		Q3UHD9;Q3UHD9-2	Arf-GAP with GTPase, ANK repeat and PH domain-containing protein 2;Isoform 2 of Arf-GAP with GTPase, ANK repeat and PH domain-containing protein 2	AGAP2_MOUSE	Agap2	10553	10056	9824	7613	9415	8929		10144.3	8652.33		-0.234651	0.0390447	0.0647747
	ENSMUSG00000023353	ArfGAP with GTPase domain, ankyrin repeat and PH domain 3 [Source:MGI Symbol;Acc:MGI:2183446]	Agap3	25.3	22.3	26.9	31.2	25.5	25.3		24.8333	27.3333		0.0412707	0.432257	0.251915		Q8VHH5	Arf-GAP with GTPase, ANK repeat and PH domain-containing protein 3	AGAP3_MOUSE	Agap3	869	2801	650	745	658	725		1440	709.333		-0.718119	0.086493	0.226665
	ENSMUSG00000026159	ArfGAP with FG repeats 1 [Source:MGI Symbol;Acc:MGI:1333754]	Agfg1	60.6	59.1	61.8	76.3	63	64.2		60.5	67.8333		0.104799	0.0873598	1.6118		Q8K2K6;Q8K2K6-1;Q8K2K6-3	Arf-GAP domain and FG repeat-containing protein 1;Isoform 1 of Arf-GAP domain and FG repeat-containing protein 1;Isoform 3 of Arf-GAP domain and FG repeat-containing protein 1	AGFG1_MOUSE	Agfg1	33678	38632	32476	29077	32434	33221		34928.7	31577.3		-0.143832	0.0831168	0.2144
	ENSMUSG00000029722	ArfGAP with FG repeats 2 [Source:MGI Symbol;Acc:MGI:2443267]	Agfg2	54.2	58.5	59.6	52.3	56.8	54.2		57.4333	54.4333		-0.058071	0.356553	0.42369		Q80WC7;Q80WC7-2	Arf-GAP domain and FG repeat-containing protein 2;Isoform 2 of Arf-GAP domain and FG repeat-containing protein 2	AGFG2_MOUSE	Agfg2	9172	9483	9374	6876	8135	8238		9343	7749.67		-0.274413	0.0288563	0.0297785
	ENSMUSG00000021681	angiogenic factor with G patch and FHA domains 1 [Source:MGI Symbol;Acc:MGI:1913799]	Aggf1	103.6	106.7	105.5	103.9	103.9	98.9		105.267	102.233		-0.0329233	0.368535	0.394692		Q7TN31	Angiogenic factor with G patch and FHA domains 1	AGGF1_MOUSE	Aggf1	444	403	402	358	452	406		416.333	405.333		-0.043591	0.20319	0.707975
	ENSMUSG00000029916	acylglycerol kinase [Source:MGI Symbol;Acc:MGI:1917173]	Agk	5.6	4.9	5.6	6	5.4	5.4		5.36667	5.6		0.0266888	0.472706	0.169171		Q9ESW4	Acylglycerol kinase, mitochondrial	AGK_MOUSE	Agk	25327	25028	22063	19280	21522	21690		24139.3	20830.7		-0.211967	0.0405081	0.0695522
	ENSMUSG00000033400	amylo-1,6-glucosidase, 4-alpha-glucanotransferase [Source:MGI Symbol;Acc:MGI:1924809]	Agl	4.6	4.3	4.3	3.2	4.2	3.8		4.4	3.73333		-0.14913	0.184166	0.978857		F8VPN4	Amylo-1,6-glucosidase, 4-alpha-glucanotransferase	F8VPN4_MOUSE	Agl	733	666	520	229	448	441		639.667	372.667		-0.829407	0.0289943	0.0308884
	ENSMUSG00000041530	argonaute RISC catalytic subunit 1 [Source:MGI Symbol;Acc:MGI:2446630]	Ago1	21.8	20.7	22.7	21.8	18.4	20.3		21.7333	20.1667		-0.157625	0.0848099	1.63794		Q8CJG1	Protein argonaute-1	AGO1_MOUSE	Ago1	194	304	166	137	140	278		221.333	185		-0.292208	0.141246	0.441093
	ENSMUSG00000036698	argonaute RISC catalytic subunit 2 [Source:MGI Symbol;Acc:MGI:2446632]	Ago2	83.4	74	83.1	81.8	75.2	75.2		80.1667	77.4		-0.075403	0.20353	0.89089		Q8CJG0	Protein argonaute-2	AGO2_MOUSE	Ago2	36598	33701	31906	24635	28297	27381		34068.3	26771		-0.34795	0.0279451	0.0109118
	ENSMUSG00000034254	1-acylglycerol-3-phosphate O-acyltransferase 1 (lysophosphatidic acid acyltransferase, alpha) [Source:MGI Symbol;Acc:MGI:1932075]	Agpat1	52.7	51.1	53.6	49.9	47.7	48.5		52.4667	48.7		-0.114438	0.109006	1.41843		O35083	1-acyl-sn-glycerol-3-phosphate acyltransferase alpha	PLCA_MOUSE	Agpat1	4080	4089	4267	3328	4362	4148		4145.33	3946		-0.0804927	0.1622	0.527434
	ENSMUSG00000001211	1-acylglycerol-3-phosphate O-acyltransferase 3 [Source:MGI Symbol;Acc:MGI:1336186]	Agpat3	102.2	95.2	101.2	103.5	93.4	96.1		99.5333	97.6667		-0.0487657	0.270708	0.655947		Q9D517	1-acyl-sn-glycerol-3-phosphate acyltransferase gamma	PLCC_MOUSE	Agpat3	58392	53786	53869	36739	44414	41931		55349	41028		-0.435371	0.0279451	0.00474236
	ENSMUSG00000023827	1-acylglycerol-3-phosphate O-acyltransferase 4 (lysophosphatidic acid acyltransferase, delta) [Source:MGI Symbol;Acc:MGI:1915512]	Agpat4	29.9	26.6	28.7	15.6	22.2	22.9		28.4	20.2333		-0.370004	0.042798	2.19286		Q8K4X7	1-acyl-sn-glycerol-3-phosphate acyltransferase delta	PLCD_MOUSE	Agpat4	5685	3615	17696	3012	3816	3973		8998.67	3600.33		-0.997832	0.0589991	0.131123
	ENSMUSG00000031467	1-acylglycerol-3-phosphate O-acyltransferase 5 (lysophosphatidic acid acyltransferase, epsilon) [Source:MGI Symbol;Acc:MGI:1196345]	Agpat5	25.8	25.8	26.3	23.8	25.1	24.7		25.9667	24.5333		-0.0582755	0.277753	0.635698		Q9D1E8	1-acyl-sn-glycerol-3-phosphate acyltransferase epsilon	PLCE_MOUSE	Agpat5	4001	4232	3529	2751	3054	3591		3920.67	3132		-0.328639	0.0328679	0.0448335
	ENSMUSG00000042410	alkylglycerone phosphate synthase [Source:MGI Symbol;Acc:MGI:2443065]	Agps	66.2	59.6	68.7	69	63.3	63.4		64.8333	65.2333		-0.0263001	0.446156	0.222199		Q8C0I1	Alkyldihydroxyacetonephosphate synthase, peroxisomal	ADAS_MOUSE	Agps	53865	52152	53845	41325	48109	46056		53287.3	45163.3		-0.241391	0.0291707	0.0317813
	ENSMUSG00000026491	AT hook containing transcription factor 1 [Source:MGI Symbol;Acc:MGI:1915033]	Ahctf1	47.9	44.9	48.3	53.4	48.2	46.8		47.0333	49.4667		0.0391437	0.343324	0.457378		Q8CJF7	Protein ELYS	ELYS_MOUSE	Ahctf1	11270	10334	10730	8931	10540	10029		10778	9833.33		-0.134863	0.0787103	0.199071
	ENSMUSG00000027597	S-adenosylhomocysteine hydrolase [Source:MGI Symbol;Acc:MGI:87968]	Ahcy	119.7	125.6	126.8	134	132.1	122.2		124.033	129.433		0.0512404	0.358305	0.41973		P50247	Adenosylhomocysteinase	SAHH_MOUSE	Ahcy	693745	662300	659621	527141	613507	593626		671889	578091		-0.219568	0.0334171	0.0476976
	ENSMUSG00000027893	S-adenosylhomocysteine hydrolase-like 1 [Source:MGI Symbol;Acc:MGI:2385184]	Ahcyl1	54.2	48.3	52.7	52.4	51.3	51.4		51.7333	51.7		0.0033375	0.546517	0.0252726		Q80SW1	S-adenosylhomocysteine hydrolase-like protein 1	SAHH2_MOUSE	Ahcyl1	5615	5870	4146	5557	5385	4425		5210.33	5122.33		-0.0151455	0.250264	0.931068
	ENSMUSG00000029772	S-adenosylhomocysteine hydrolase-like 2 [Source:MGI Symbol;Acc:MGI:1921590]	Ahcyl2	7.7	8.2	7.8	9	8.4	8.1		7.9	8.5		0.101134	0.224305	0.806164		Q68FL4	Putative adenosylhomocysteinase 3	SAHH3_MOUSE	Ahcyl2	26028	26641	29412	25598	26157	23965		27360.3	25240		-0.11532	0.0872482	0.229122
	ENSMUSG00000037692	AT hook, DNA binding motif, containing 1 [Source:MGI Symbol;Acc:MGI:2444218]	Ahdc1	22.8	23	23.2	19.3	20.1	19.1		23	19.5		-0.219489	0.0286005	2.52642		Q6PAL7	AT-hook DNA-binding motif-containing protein 1	AHDC1_MOUSE	Ahdc1	149	206	191	145	168	159		182	157.333		-0.199329	0.08255	0.212399
	ENSMUSG00000069833	AHNAK nucleoprotein (desmoyokin) [Source:MGI Symbol;Acc:MGI:1316648]	Ahnak	73.1	66.8	72.1	74.9	68.8	64.5		70.6667	69.4		-0.0566224	0.429176	0.259613		E9Q616	AHNAK nucleoprotein (desmoyokin)	E9Q616_MOUSE	Ahnak	153241	168057	166362	115141	141896	137809		162553	131615		-0.309391	0.0288244	0.0285549
	ENSMUSG00000021037	AHA1, activator of heat shock protein ATPase 1 [Source:MGI Symbol;Acc:MGI:2387603]	Ahsa1	109.4	107.9	106.6	116.1	107.4	107.1		107.967	110.2		0.0242623	0.439394	0.236826		Q8BK64	Activator of 90 kDa heat shock protein ATPase homolog 1	AHSA1_MOUSE	Ahsa1	311239	286734	301592	253162	272676	273417		299855	266418		-0.170661	0.0416489	0.0730119
	ENSMUSG00000020288	AHA1, activator of heat shock protein ATPase 2 [Source:MGI Symbol;Acc:MGI:1916133]	Ahsa2	34	32.1	32	27.1	28.8	29.2		32.7	28.3667		-0.153528	0.042274	2.20793		Q8N9S3;Q8N9S3-2;Q8N9S3-3	Activator of 90 kDa heat shock protein ATPase homolog 2;Isoform 2 of Activator of 90 kDa heat shock protein ATPase homolog 2;Isoform 3 of Activator of 90 kDa heat shock protein ATPase homolog 2	AHSA2_MOUSE	Ahsa2	8554	9585	10288	7024	8888	9209		9475.67	8373.67		-0.184357	0.0861917	0.225094
	ENSMUSG00000042901	axin interactor, dorsalization associated [Source:MGI Symbol;Acc:MGI:1919737]	Aida	38.5	37.1	38.7	47.5	40.9	41.7		38.1	43.3667		0.146829	0.0341044	2.38216		Q8C4Q6	Axin interactor, dorsalization-associated protein	AIDA_MOUSE	Aida	10556	10233	10078	4907	6268	5226		10289	5467		-0.919911	0.0279451	0.000167699
	ENSMUSG00000036932	apoptosis-inducing factor, mitochondrion-associated 1 [Source:MGI Symbol;Acc:MGI:1349419]	Aifm1	42.8	39.8	42.2	43.4	40.7	40.8		41.6	41.6333		-0.00965291	0.521335	0.0749136		Q9Z0X1	Apoptosis-inducing factor 1, mitochondrial	AIFM1_MOUSE	Aifm1	59734	57777	56718	46089	55362	55069		58076.3	52173.3		-0.159432	0.0677216	0.159784
	ENSMUSG00000037860	absent in melanoma 2 [Source:MGI Symbol;Acc:MGI:2686159]	Aim2	70.9	71.4	69.3	54	62.9	61.8		70.5333	59.5667		-0.170693	0.0883728	1.60015		Q91VJ1	Interferon-inducible protein AIM2	AIM2_MOUSE	Aim2	15913	15454	14376	7446	10495	9804		15247.7	9248.33		-0.735389	0.0279451	0.00232617
	ENSMUSG00000028029	aminoacyl tRNA synthetase complex-interacting multifunctional protein 1 [Source:MGI Symbol;Acc:MGI:102774]	Aimp1	53.5	55.6	55.7	55.8	57.7	55.5		54.9333	56.3333		0.0531698	0.311719	0.53822		P31230	Aminoacyl tRNA synthase complex-interacting multifunctional protein 1	AIMP1_MOUSE	Aimp1	244667	255072	272509	200428	226925	227323		257416	218225		-0.239328	0.0310905	0.0392156
	ENSMUSG00000029610	aminoacyl tRNA synthetase complex-interacting multifunctional protein 2 [Source:MGI Symbol;Acc:MGI:2385237]	Aimp2	119.8	129.1	123.3	135	124.4	125.6		124.067	128.333		0.0412954	0.430222	0.257529		Q8R010	Aminoacyl tRNA synthase complex-interacting multifunctional protein 2	AIMP2_MOUSE	Aimp2	168667	160540	170865	123286	145458	141937		166691	136894		-0.287368	0.0279451	0.0217042
	ENSMUSG00000024847	aryl-hydrocarbon receptor-interacting protein [Source:MGI Symbol;Acc:MGI:109622]	Aip	160.2	178.7	170.1	193.7	173.3	176.9		169.667	181.3		0.074623	0.253721	0.709387		O08915	AH receptor-interacting protein	AIP_MOUSE	Aip	199686	190702	210612	156595	184382	166178		200333	169052		-0.247058	0.0310673	0.0390999
	ENSMUSG00000028792	adenylate kinase 2 [Source:MGI Symbol;Acc:MGI:87978]	Ak2	243	245.9	254.8	320.7	275.4	270.5		247.9	288.867		0.1668	0.0225383	2.70487		Q9WTP6;Q9WTP6-2	Adenylate kinase 2, mitochondrial;Isoform 2 of Adenylate kinase 2, mitochondrial	KAD2_MOUSE	Ak2	189435	171991	179261	182415	187296	172195		180229	180635		0.00349669	0.257558	0.966667
	ENSMUSG00000024782	adenylate kinase 3 [Source:MGI Symbol;Acc:MGI:1860835]	Ak3	72.6	73.8	77.5	76.4	70.5	73.3		74.6333	73.4		-0.0481892	0.326235	0.50052		Q9WTP7	GTP:AMP phosphotransferase AK3, mitochondrial	KAD3_MOUSE	Ak3	79953	81446	90615	75221	82999	83468		84004.7	80562.7		-0.0597644	0.163614	0.533878
	ENSMUSG00000028527	adenylate kinase 4 [Source:MGI Symbol;Acc:MGI:87979]	Ak4	4.1	5	4.1	2.9	3.9	3.1		4.4	3.3		-0.294868	0.156132	1.1193		Q9WUR9	Adenylate kinase 4, mitochondrial	KAD4_MOUSE	Ak4	6794	6928	7345	4870	6366	6078		7022.33	5771.33		-0.291852	0.0352669	0.0533562
	ENSMUSG00000078941	adenylate kinase 6 [Source:MGI Symbol;Acc:MGI:5510732]	Ak6	28.1	28.9	31.2	27.2	29.9	29.7		29.4	28.9333		-0.00701902	0.541706	0.0356107		Q8VCP8	Adenylate kinase isoenzyme 6	KAD6_MOUSE	Ak6	7847	8743	9742	7323	8696	7537		8777.33	7852		-0.159237	0.0861917	0.225029
	ENSMUSG00000018428	A kinase (PRKA) anchor protein 1 [Source:MGI Symbol;Acc:MGI:104729]	Akap1	30.7	31.4	34	39.6	34.2	34.1		32.0333	35.9667		0.101915	0.187593	0.964282		O08715;O08715-4	A-kinase anchor protein 1, mitochondrial;Isoform 4 of A-kinase anchor protein 1, mitochondrial	AKAP1_MOUSE	Akap1	3751	3132	2938	2304	2364	2068		3273.67	2245.33		-0.538529	0.0279451	0.00411284
	ENSMUSG00000047804	A kinase (PRKA) anchor protein 10 [Source:MGI Symbol;Acc:MGI:1890218]	Akap10	26.1	23.6	25.3	22	22.3	22.6		25	22.3		-0.144083	0.0487297	2.08328		O88845	A-kinase anchor protein 10, mitochondrial	AKA10_MOUSE	Akap10	7917	7214	2431	1504	2547	2725		5854	2258.67		-1.24448	0.0337336	0.0485492
	ENSMUSG00000022016	A kinase (PRKA) anchor protein 11 [Source:MGI Symbol;Acc:MGI:2684060]	Akap11	34.2	31.7	33.8	34.2	33.2	32.7		33.2333	33.3667		0.00253421	0.549689	0.0203247		E9Q774;E9Q777	A kinase (PRKA) anchor protein 11	E9Q774_MOUSE;E9Q777_MOUSE	Akap11	223	370	274	234	219	281		289	244.667		-0.216912	0.113554	0.33247
	ENSMUSG00000066406	A kinase (PRKA) anchor protein 13 [Source:MGI Symbol;Acc:MGI:2676556]	Akap13	59.6	53	58.4	70.1	52.7	55.6		57	59.4667		-0.032008	0.442636	0.23041		E9Q394-2	Isoform 2 of A-kinase anchor protein 13	AKP13_MOUSE	Akap13	6547	6609	6382	6232	6123	5872		6512.67	6075.67		-0.100496	0.0814646	0.208328
	ENSMUSG00000024045	A kinase (PRKA) anchor protein 8 [Source:MGI Symbol;Acc:MGI:1928488]	Akap8	93.3	87.5	90	93.3	87.4	82.2		90.2667	87.6333		-0.0562813	0.224531	0.805321		Q9DBR0	A-kinase anchor protein 8	AKAP8_MOUSE	Akap8	20501	20904	25555	20479	22235	19820		22320	20844.7		-0.0930481	0.142498	0.446246
	ENSMUSG00000002625	A kinase (PRKA) anchor protein 8-like [Source:MGI Symbol;Acc:MGI:1860606]	Akap8l	17.6	17	17.7	18.2	16.8	16.2		17.4333	17.0667		-0.0493512	0.431275	0.25483		Q9R0L7	A-kinase anchor protein 8-like	AKP8L_MOUSE	Akap8l	1180	1146	2017	1577	1696	1715		1447.67	1662.67		0.249974	0.109676	0.317214
	ENSMUSG00000039158	AT-hook transcription factor [Source:MGI Symbol;Acc:MGI:2140340]	Akna	280.6	256.7	280.9	284.7	245.7	255.8		272.733	262.067		-0.098741	0.110298	1.41142		Q80VW7	Microtubule organization protein AKNA	AKNA_MOUSE	Akna	9184	9710	9664	7348	8479	8240		9519.33	8022.33		-0.249108	0.0288244	0.0290137
	ENSMUSG00000028692	aldo-keto reductase family 1, member A1 (aldehyde reductase) [Source:MGI Symbol;Acc:MGI:1929955]	Akr1a1	294.5	313.9	312.3	351.6	326.5	325.9		306.9	334.667		0.107402	0.0929391	1.56353		Q9JII6	Aldo-keto reductase family 1 member A1	AK1A1_MOUSE	Akr1a1	119881	116800	116842	91962	104481	100201		117841	98881.3		-0.254985	0.0279451	0.0199665
	ENSMUSG00000001642	aldo-keto reductase family 1, member B3 (aldose reductase) [Source:MGI Symbol;Acc:MGI:1353494]	Akr1b3	31.4	33	33.2	34.9	35.1	31.7		32.5333	33.9		0.0506481	0.337679	0.470686		P45376	Aldo-keto reductase family 1 member B1	ALDR_MOUSE	Akr1b1	461722	529213	531610	404856	444584	416864		507515	422101		-0.263933	0.0288244	0.0290429
	ENSMUSG00000061758	aldo-keto reductase family 1, member B10 (aldose reductase) [Source:MGI Symbol;Acc:MGI:1915111]	Akr1b10	12.3	11	11.6	12.4	11.7	10.2		11.6333	11.4333		-0.0488863	0.453764	0.206379		G5E895	Aldo-keto reductase family 1, member B10 (aldose reductase)	G5E895_MOUSE	Akr1b10	12170	12529	17232	13900	17404	10734		13977	14012.7		-0.00566633	0.260266	0.980396
	ENSMUSG00000021213	aldo-keto reductase family 1, member C13 [Source:MGI Symbol;Acc:MGI:1351662]	Akr1c13	46.3	56.3	54.5	91.9	70	64.2		52.3667	75.3667		0.401357	0.00717338	3.62661		Q8VC28	Aldo-keto reductase family 1 member C13	AK1CD_MOUSE	Akr1c13	43206	38987	40733	49032	40224	40717		40975.3	43324.3		0.0756628	0.157101	0.506002
	ENSMUSG00000045410	aldo-keto reductase family 1, member E1 [Source:MGI Symbol;Acc:MGI:1914758]	Akr1e1	8.4	8	9.2	11.1	10	10.3		8.53333	10.4667		0.246652	0.0819454	1.66257		Q9DCT1	1,5-anhydro-D-fructose reductase	AKCL2_MOUSE	Akr1e2	4851	5296	5294	5924	5758	4622		5147	5434.67		0.0710377	0.172834	0.573525
	ENSMUSG00000028743	aldo-keto reductase family 7, member A5 (aflatoxin aldehyde reductase) [Source:MGI Symbol;Acc:MGI:107796]	Akr7a5	14	15.9	16.2	14.7	14.8	13.8		15.3667	14.4333		-0.109514	0.282102	0.622356		Q8CG76	Aflatoxin B1 aldehyde reductase member 2	ARK72_MOUSE	Akr7a2	11078	11136	11350	9794	10652	10044		11188	10163.3		-0.139397	0.0522114	0.107594
	ENSMUSG00000001729	thymoma viral proto-oncogene 1 [Source:MGI Symbol;Acc:MGI:87986]	Akt1	301.2	322.5	319	320.3	315.4	301.1		314.233	312.267		-0.0115606	0.508414	0.0981441		P31750	RAC-alpha serine/threonine-protein kinase	AKT1_MOUSE	Akt1	69400	70570	76336	60161	66428	63472		72102	63353.7		-0.186538	0.0391094	0.0650502
	ENSMUSG00000011096	AKT1 substrate 1 (proline-rich) [Source:MGI Symbol;Acc:MGI:1914855]	Akt1s1	11	12.2	11.6	13.1	10.5	11.9		11.6	11.8333		-0.0182773	0.525407	0.0676022		Q9D1F4	Proline-rich AKT1 substrate 1	AKTS1_MOUSE	Akt1s1	2227	1807	1903	1419	1873	1580		1979	1624		-0.288941	0.0440657	0.0815959
	ENSMUSG00000004056	thymoma viral proto-oncogene 2 [Source:MGI Symbol;Acc:MGI:104874]	Akt2	84.4	86.5	87.4	78.3	78.9	83		86.1	80.0667		-0.0854497	0.162846	1.0858		Q60823	RAC-beta serine/threonine-protein kinase	AKT2_MOUSE	Akt2	29803	28627	28887	19833	23406	23391		29105.7	22210		-0.394173	0.0279451	0.00591595
	ENSMUSG00000031667	AKT interacting protein [Source:MGI Symbol;Acc:MGI:3693832]	Aktip	6.1	5.9	5.7	5.9	5.7	6		5.9	5.86667		0.0238327	0.506795	0.102096		Q64362	AKT-interacting protein	AKTIP_MOUSE	Aktip	445	360	224	167	216	102		343	161.667		-1.09528	0.0281378	0.0227355
	ENSMUSG00000028393	aminolevulinate, delta-, dehydratase [Source:MGI Symbol;Acc:MGI:96853]	Alad	77.9	77.9	80.4	64.5	65.8	70.6		78.7333	66.9667		-0.210584	0.0400107	2.25898		P10518	Delta-aminolevulinic acid dehydratase	HEM2_MOUSE	Alad	110829	92804	82383	46867	62171	65255		95338.7	58097.7		-0.718631	0.0279451	0.0059107
	ENSMUSG00000022636	activated leukocyte cell adhesion molecule [Source:MGI Symbol;Acc:MGI:1313266]	Alcam	21.8	19.8	21.7	15.7	17.8	19.1		21.1	17.5333		-0.212212	0.0470786	2.11885		Q61490	CD166 antigen	CD166_MOUSE	Alcam	11228	12155	12496	8011	9009	9082		11959.7	8700.67		-0.459847	0.0279451	0.00230379
	ENSMUSG00000007833	aldehyde dehydrogenase 16 family, member A1 [Source:MGI Symbol;Acc:MGI:1916998]	Aldh16a1	20.6	20.3	20.8	24	22.1	20.9		20.5667	22.3333		0.0946856	0.149053	1.16106		Q571I9	Aldehyde dehydrogenase family 16 member A1	A16A1_MOUSE	Aldh16a1	23439	19839	22266	18600	20545	20749		21848	19964.7		-0.12832	0.0893136	0.237872
	ENSMUSG00000025007	aldehyde dehydrogenase 18 family, member A1 [Source:MGI Symbol;Acc:MGI:1888908]	Aldh18a1	166.6	174.9	171.5	147.1	161.4	153		171	153.833		-0.114354	0.0731203	1.75588		Q9Z110	Delta-1-pyrroline-5-carboxylate synthase	P5CS_MOUSE	Aldh18a1	183516	163708	167433	115221	146754	139523		171552	133833		-0.364103	0.0279451	0.0210802
	ENSMUSG00000035561	aldehyde dehydrogenase 1 family, member B1 [Source:MGI Symbol;Acc:MGI:1919785]	Aldh1b1	9.6	10.1	9.6	9.3	8.4	8		9.76667	8.56667		-0.210496	0.102405	1.47437		Q9CZS1	Aldehyde dehydrogenase X, mitochondrial	AL1B1_MOUSE	Aldh1b1	1128	1586	1575	1182	1492	1313		1429.67	1329		-0.0943891	0.177863	0.595863
	ENSMUSG00000029455	aldehyde dehydrogenase 2, mitochondrial [Source:MGI Symbol;Acc:MGI:99600]	Aldh2	1.3	1.2	1.3	3.2	2.4	2.2		1.26667	2.6		0.906458	0.00152364	5.01672		P47738	Aldehyde dehydrogenase, mitochondrial	ALDH2_MOUSE	Aldh2	9938	2705	2508	3016	2987	2996		5050.33	2999.67		-0.44025	0.140875	0.43939
	ENSMUSG00000010025	aldehyde dehydrogenase family 3, subfamily A2 [Source:MGI Symbol;Acc:MGI:1353452]	Aldh3a2	29	29.7	29.6	28.4	30.1	28.3		29.4333	28.9333		-0.00169156	0.555464	0.0113671		P47740	Aldehyde dehydrogenase family 3 member A2	AL3A2_MOUSE	Aldh3a2	17110	15939	17170	13099	16235	14797		16739.7	14710.3		-0.191141	0.054049	0.114172
	ENSMUSG00000028737	aldehyde dehydrogenase 4 family, member A1 [Source:MGI Symbol;Acc:MGI:2443883]	Aldh4a1	4.9	4.2	4.4	4	5.1	4.1		4.5	4.4		0.042778	0.484276	0.149058		Q8CHT0	Delta-1-pyrroline-5-carboxylate dehydrogenase, mitochondrial	AL4A1_MOUSE	Aldh4a1	3640	4658	4235	3703	4381	4231		4177.67	4105		-0.0216859	0.236948	0.866735
	ENSMUSG00000053644	aldehyde dehydrogenase family 7, member A1 [Source:MGI Symbol;Acc:MGI:108186]	Aldh7a1	14.1	14.9	14.5	10.8	12.4	13.5		14.5	12.2333		-0.174459	0.113126	1.39281		Q9DBF1-2	Isoform 2 of Alpha-aminoadipic semialdehyde dehydrogenase	AL7A1_MOUSE	Aldh7a1	11198	10501	10619	6506	9490	8908		10772.7	8301.33		-0.394307	0.0326056	0.0439536
	ENSMUSG00000026687	aldehyde dehydrogenase 9, subfamily A1 [Source:MGI Symbol;Acc:MGI:1861622]	Aldh9a1	107.6	121.1	117	122.6	122.1	117		115.233	120.567		0.0676267	0.269006	0.661345		Q9JLJ2	4-trimethylaminobutyraldehyde dehydrogenase	AL9A1_MOUSE	Aldh9a1	142048	150216	151397	123346	140808	134889		147887	133014		-0.154514	0.055256	0.118062
	ENSMUSG00000030695	aldolase A, fructose-bisphosphate [Source:MGI Symbol;Acc:MGI:87994]	Aldoa	2237.4	2506.5	2347.9	2124.4	2334.9	2220.9		2363.93	2226.73		-0.043001	0.464034	0.186599		P05064	Fructose-bisphosphate aldolase A	ALDOA_MOUSE	Aldoa	6788360	7203356	7182608	4504996	5940496	6012590		7058108	5.48603e+06		-0.375381	0.0288324	0.0294282
	ENSMUSG00000017390	aldolase C, fructose-bisphosphate [Source:MGI Symbol;Acc:MGI:101863]	Aldoc	30.9	34.7	31	22.1	36.4	30.1		32.2	29.5333		0.0270831	0.534619	0.0488658		P05063	Fructose-bisphosphate aldolase C	ALDOC_MOUSE	Aldoc	290360	294734	220950	182471	247085	224041		268681	217866		-0.301513	0.0561321	0.120816
	ENSMUSG00000039427	asparagine-linked glycosylation 1 (beta-1,4-mannosyltransferase) [Source:MGI Symbol;Acc:MGI:2384774]	Alg1	30.3	31.4	33.9	27.4	27.5	29.1		31.8667	28		-0.191242	0.0485325	2.08836		Q921Q3;Q921Q3-2	Chitobiosyldiphosphodolichol beta-mannosyltransferase;Isoform 2 of Chitobiosyldiphosphodolichol beta-mannosyltransferase	ALG1_MOUSE	Alg1	7105	8586	5634	7879	7664	6533		7108.33	7358.67		0.0662918	0.204875	0.714743
	ENSMUSG00000075470	asparagine-linked glycosylation 10B (alpha-1,2-glucosyltransferase) [Source:MGI Symbol;Acc:MGI:2146159]	Alg10b	52.2	46.3	46.6	50.3	47.7	46.8		48.3667	48.2667		0.0125708	0.506549	0.102852		Q3UGP8	Putative Dol-P-Glc:Glc(2)Man(9)GlcNAc(2)-PP-Dol alpha-1,2-glucosyltransferase	AG10B_MOUSE	Alg10b	481	684	518	403	487	389		561	426.333		-0.386171	0.0368275	0.0580881
	ENSMUSG00000063362	asparagine-linked glycosylation 11 (alpha-1,2-mannosyltransferase) [Source:MGI Symbol;Acc:MGI:2142632]	Alg11	17.7	17.5	18.4	16	16.2	17.5		17.8667	16.5667		-0.0882576	0.21825	0.829879		Q3TZM9	GDP-Man:Man(3)GlcNAc(2)-PP-Dol alpha-1,2-mannosyltransferase	ALG11_MOUSE	Alg11	1504	1669	1652	1166	1198	1480		1608.33	1281.33		-0.334736	0.0288563	0.0298502
	ENSMUSG00000039740	asparagine-linked glycosylation 2 (alpha-1,3-mannosyltransferase) [Source:MGI Symbol;Acc:MGI:1914731]	Alg2	26.6	24.2	27.1	21.3	23.7	20.8		25.9667	21.9333		-0.229104	0.0297219	2.49196		Q9DBE8	Alpha-1,3/1,6-mannosyltransferase ALG2	ALG2_MOUSE	Alg2	8534	7927	7779	4946	6844	6332		8080	6040.67		-0.43194	0.0279451	0.0202338
	ENSMUSG00000033809	asparagine-linked glycosylation 3 (alpha-1,3-mannosyltransferase) [Source:MGI Symbol;Acc:MGI:1098592]	Alg3	63.5	66.4	59.8	53.6	57.7	56		63.2333	55.7667		-0.112915	0.190207	0.952316		Q8K2A8	Dol-P-Man:Man(5)GlcNAc(2)-PP-Dol alpha-1,3-mannosyltransferase	ALG3_MOUSE	Alg3	4905	3950	3859	2500	3185	3112		4238	2932.33		-0.53109	0.0279451	0.0104767
	ENSMUSG00000036632	asparagine-linked glycosylation 5 (dolichyl-phosphate beta-glucosyltransferase) [Source:MGI Symbol;Acc:MGI:1913498]	Alg5	59.6	60.2	57.4	61	60.2	60.3		59.0667	60.5		0.0613668	0.347851	0.44668		Q9DB25	Dolichyl-phosphate beta-glucosyltransferase	ALG5_MOUSE	Alg5	37650	37535	36640	27279	32763	31911		37275	30651		-0.286798	0.0283184	0.0241623
	ENSMUSG00000035704	asparagine-linked glycosylation 8 (alpha-1,3-glucosyltransferase) [Source:MGI Symbol;Acc:MGI:2141959]	Alg8	63.5	55.7	60.5	60.5	60.9	56.3		59.9	59.2333		-0.0104929	0.525286	0.0681689		Q6P8H8	Probable dolichyl pyrophosphate Glc1Man9GlcNAc2 alpha-1,3-glucosyltransferase	ALG8_MOUSE	Alg8	9641	6651	8396	6831	7168	6626		8229.33	6875		-0.24355	0.0643816	0.148464
	ENSMUSG00000032059	asparagine-linked glycosylation 9 (alpha 1,2 mannosyltransferase) [Source:MGI Symbol;Acc:MGI:1924753]	Alg9	28.9	30	29.8	25.1	25.9	26		29.5667	25.6667		-0.179954	0.0612049	1.90015		Q8VDI9	Alpha-1,2-mannosyltransferase ALG9	ALG9_MOUSE	Alg9	1891	1139	1811	1414	1372	1437		1613.67	1407.67		-0.161527	0.145363	0.457687
	ENSMUSG00000040174	alkB homolog 3, alpha-ketoglutarate-dependent dioxygenase [Source:MGI Symbol;Acc:MGI:1916363]	Alkbh3	25.2	24.1	24.4	22.1	23.1	21.9		24.5667	22.3667		-0.105997	0.153515	1.13679		Q8K1E6	Alpha-ketoglutarate-dependent dioxygenase alkB homolog 3	ALKB3_MOUSE	Alkbh3	9257	8133	7919	5944	7134	7145		8436.33	6741		-0.325524	0.0288244	0.0287995
	ENSMUSG00000042650	alkB homolog 5, RNA demethylase [Source:MGI Symbol;Acc:MGI:2144489]	Alkbh5	64.9	64.8	66.1	69.1	68.4	61.3		65.2667	66.2667		0.0129664	0.498043	0.122898		Q3TSG4	RNA demethylase ALKBH5	ALKB5_MOUSE	Alkbh5	25476	22972	22003	18479	20881	20192		23483.7	19850.7		-0.241618	0.0324822	0.0436212
	ENSMUSG00000042831	alkB homolog 6 [Source:MGI Symbol;Acc:MGI:2142037]	Alkbh6	7.9	8.9	9	8.4	6.7	7.2		8.6	7.43333		-0.285656	0.0736033	1.75036		Q8K2U2	Alpha-ketoglutarate-dependent dioxygenase alkB homolog 6	ALKB6_MOUSE	Alkbh6	2439	2278	1873	1808	1873	1810		2196.67	1830.33		-0.254558	0.0407951	0.0703523
	ENSMUSG00000025899	alkB homolog 8, tRNA methyltransferase [Source:MGI Symbol;Acc:MGI:1914917]	Alkbh8	14.2	14.2	15.3	15.1	14.7	13.8		14.5667	14.5333		-0.0295058	0.4383	0.238624		Q80Y20;Q80Y20-2	Alkylated DNA repair protein alkB homolog 8;Isoform 2 of Alkylated DNA repair protein alkB homolog 8	ALKB8_MOUSE	Alkbh8	376	0	553	440	401	217		309.667	352.667		-0.436072	0.10271	0.289582
	ENSMUSG00000025134	Aly/REF export factor [Source:MGI Symbol;Acc:MGI:1341044]	Alyref	142.4	148.6	149.5	172.1	157.7	157.6		146.833	162.467		0.123429	0.10528	1.44863		O08583	THO complex subunit 4	THOC4_MOUSE	Alyref	307860	301707	391125	362200	358231	301179		333564	340537		0.0350819	0.2249	0.808323
	ENSMUSG00000040506	autophagy/beclin 1 regulator 1 [Source:MGI Symbol;Acc:MGI:2443564]	Ambra1	41.4	39.3	41	45.9	40.9	39		40.5667	41.9333		0.0124598	0.505611	0.104674		A2AH22;A2AH22-2;A2AH22-5;A2AH22-6;A2AH22-7	Activating molecule in BECN1-regulated autophagy protein 1;Isoform 2 of Activating molecule in BECN1-regulated autophagy protein 1;Isoform 5 of Activating molecule in BECN1-regulated autophagy protein 1;Isoform 6 of Activating molecule in BECN1-regulated autophagy protein 1;Isoform 7 of Activating molecule in BECN1-regulated autophagy protein 1	AMRA1_MOUSE	Ambra1	1007	1013	1123	819	1001	872		1047.67	897.333		-0.226759	0.0421809	0.0753299
	ENSMUSG00000036820	amidohydrolase domain containing 2 [Source:MGI Symbol;Acc:MGI:2443978]	Amdhd2	19.2	20.2	20.7	19.8	18.3	19		20.0333	19.0333		-0.0963776	0.229072	0.788282		Q8JZV7	N-acetylglucosamine-6-phosphate deacetylase	NAGA_MOUSE	Amdhd2	19668	18586	19249	16023	16777	17541		19167.7	16780.3		-0.192497	0.0329794	0.0452632
	ENSMUSG00000031751	autocrine motility factor receptor [Source:MGI Symbol;Acc:MGI:1345634]	Amfr	167.4	171.4	169.3	153.8	160.9	166.8		169.367	160.5		-0.0409894	0.35538	0.426544		Q9R049-2	Isoform 2 of E3 ubiquitin-protein ligase AMFR	AMFR_MOUSE	Amfr	6438	6461	6500	4556	5519	5802		6466.33	5292.33		-0.296695	0.0300456	0.035642
	ENSMUSG00000041915	AMME chromosomal region gene 1-like [Source:MGI Symbol;Acc:MGI:2442711]	Ammecr1l	19.9	18.3	18.8	20.8	17.2	16.6		19	18.2		-0.110457	0.165844	1.0724		Q8JZZ6	AMMECR1-like protein	AMERL_MOUSE	Ammecr1l	2059	2255	2391	1690	2189	1527		2235	1802		-0.324897	0.0425296	0.0767326
	ENSMUSG00000027889	adenosine monophosphate deaminase 2 [Source:MGI Symbol;Acc:MGI:88016]	Ampd2	82.2	81.2	84.5	84.2	77.3	72.1		82.6333	77.8667		-0.120185	0.0898638	1.58876		Q9DBT5	AMP deaminase 2	AMPD2_MOUSE	Ampd2	34970	22468	27039	20757	23366	32637		28159	25586.7		-0.141505	0.170003	0.561337
	ENSMUSG00000014355	anaphase promoting complex subunit 1 [Source:MGI Symbol;Acc:MGI:103097]	Anapc1	55.3	52.4	57.4	60.3	52.9	53.5		55.0333	55.5667		-0.0323523	0.383143	0.360662		P53995	Anaphase-promoting complex subunit 1	APC1_MOUSE	Anapc1	10580	10716	10218	8401	9439	8864		10504.7	8901.33		-0.240283	0.0282128	0.0236643
	ENSMUSG00000025135	anaphase promoting complex subunit 11 [Source:MGI Symbol;Acc:MGI:1913406]	Anapc11	27.7	29.1	29	34.7	31.5	28.2		28.6	31.4667		0.0941453	0.216987	0.835078		Q9CPX9	Anaphase-promoting complex subunit 11	APC11_MOUSE	Anapc11	2235	2409	3507	1846	2485	2218		2717	2183		-0.297346	0.0780833	0.1971
	ENSMUSG00000026965	anaphase promoting complex subunit 2 [Source:MGI Symbol;Acc:MGI:2139135]	Anapc2	72.8	80.3	80	98	78.7	79.9		77.7	85.5333		0.0613583	0.303282	0.562592		Q8BZQ7	Anaphase-promoting complex subunit 2	ANC2_MOUSE	Anapc2	12535	11814	11346	9111	10563	9860		11898.3	9844.67		-0.274761	0.0281378	0.0230813
	ENSMUSG00000029176	anaphase promoting complex subunit 4 [Source:MGI Symbol;Acc:MGI:1098673]	Anapc4	41	42.4	43.6	41	41.8	41		42.3333	41.2667		-0.0291394	0.415095	0.291061		Q91W96	Anaphase-promoting complex subunit 4	APC4_MOUSE	Anapc4	13774	12986	14028	11232	10906	10075		13596	10737.7		-0.341232	0.0279451	0.00596492
	ENSMUSG00000029472	anaphase-promoting complex subunit 5 [Source:MGI Symbol;Acc:MGI:1929722]	Anapc5	236.8	239.3	249.9	279.4	246.8	246.5		242	257.567		0.0480309	0.299898	0.572685		Q8BTZ4	Anaphase-promoting complex subunit 5	APC5_MOUSE	Anapc5	21790	14254	14209	14972	16675	15087		16751	15578		-0.0761928	0.20048	0.694911
	ENSMUSG00000029466	anaphase promoting complex subunit 7 [Source:MGI Symbol;Acc:MGI:1929711]	Anapc7	31.3	31.6	32.9	37	31.8	32.5		31.9333	33.7667		0.0296607	0.419295	0.281568		Q9WVM3	Anaphase-promoting complex subunit 7	APC7_MOUSE	Anapc7	14916	13108	11720	8082	11746	14239		13248	11355.7		-0.253826	0.105088	0.298647
	ENSMUSG00000026634	angel homolog 2 [Source:MGI Symbol;Acc:MGI:1196310]	Angel2	35.6	33.3	34.8	38.9	34.3	34.9		34.5667	36.0333		0.0316184	0.412728	0.295942		Q8K1C0;Q8K1C0-2;Q8K1C0-3	Protein angel homolog 2;Isoform 2 of Protein angel homolog 2;Isoform 3 of Protein angel homolog 2	ANGE2_MOUSE	Angel2	5205	8509	5738	4966	4994	6379		6484	5446.33		-0.227942	0.111892	0.326074
	ENSMUSG00000020790	ankyrin repeat and FYVE domain containing 1 [Source:MGI Symbol;Acc:MGI:1337008]	Ankfy1	44.7	44.6	47	47.7	44.5	45		45.4333	45.7333		-0.0121092	0.499936	0.117694		Q810B6	Rabankyrin-5	ANFY1_MOUSE	Ankfy1	37811	36486	36133	18201	28175	29641		36810	25339		-0.571146	0.0285336	0.0265693
	ENSMUSG00000024483	ankyrin repeat and KH domain containing 1 [Source:MGI Symbol;Acc:MGI:1921733]	Ankhd1	28.4	24.4	27.5	29.2	25.6	25.5		26.7667	26.7667		-0.0389378	0.384267	0.358319		E9PUR0;E9Q1M6	Ankyrin repeat and KH domain-containing 1	E9PUR0_MOUSE;E9Q1M6_MOUSE	Ankhd1	15224	14278	14412	10142	10566	12433		14638	11047		-0.411155	0.0279451	0.00697572
	ENSMUSG00000029501	ankyrin repeat and LEM domain containing 2 [Source:MGI Symbol;Acc:MGI:1261856]	Ankle2	44.5	42.3	43.7	47.1	43.5	43		43.5	44.5333		0.0207247	0.462197	0.190506		Q6P1H6	Ankyrin repeat and LEM domain-containing protein 2	ANKL2_MOUSE	Ankle2	7982	8027	8886	6269	7626	6905		8298.33	6933.33		-0.262114	0.0326224	0.0441659
	ENSMUSG00000036188	ankyrin repeat and MYND domain containing 2 [Source:MGI Symbol;Acc:MGI:2144755]	Ankmy2	9.4	9.3	9.8	10.8	9.6	9.9		9.5	10.1		0.048787	0.388051	0.348844		Q3TPE9	Ankyrin repeat and MYND domain-containing protein 2	ANKY2_MOUSE	Ankmy2	6365	6039	6075	3797	5162	4974		6159.67	4644.33		-0.420053	0.0279451	0.0202221
	ENSMUSG00000031508	ankyrin repeat domain 10 [Source:MGI Symbol;Acc:MGI:1921840]	Ankrd10	35.5	33.2	32.1	42.7	34.3	31.3		33.6	36.1		0.0454094	0.409483	0.304127		Q99LW0	Ankyrin repeat domain-containing protein 10	ANR10_MOUSE	Ankrd10	2792	2489	2358	2251	2325	2164		2546.33	2246.67		-0.177644	0.0509888	0.10324
	ENSMUSG00000035569	ankyrin repeat domain 11 [Source:MGI Symbol;Acc:MGI:1924337]	Ankrd11	54.9	53.9	55.2	58.3	53.5	48.2		54.6667	53.3333		-0.0702067	0.206816	0.87602		E9Q4F7	Ankyrin repeat domain-containing protein 11	ANR11_MOUSE	Ankrd11	433	304	329	284	303	301		355.333	296		-0.247185	0.0618652	0.139749
	ENSMUSG00000041870	ankyrin repeat domain 13a [Source:MGI Symbol;Acc:MGI:1915670]	Ankrd13a	115.7	120.6	124.1	116.6	123.5	112.1		120.133	117.4		-0.0254969	0.439394	0.236753		Q80UP5	Ankyrin repeat domain-containing protein 13A	AN13A_MOUSE	Ankrd13a	11826	10498	10470	7960	8788	8607		10931.3	8451.67		-0.370103	0.0279451	0.00614476
	ENSMUSG00000055204	ankyrin repeat domain 17 [Source:MGI Symbol;Acc:MGI:1932101]	Ankrd17	26.5	24.9	25.7	26.2	24.8	25.3		25.7	25.4333		-0.0143834	0.486671	0.14447		Q99NH0	Ankyrin repeat domain-containing protein 17	ANR17_MOUSE	Ankrd17	5242	5074	4730	3241	3914	3707		5015.33	3620.67		-0.473249	0.0279451	0.00336871
	ENSMUSG00000014496	ankyrin repeat domain 28 [Source:MGI Symbol;Acc:MGI:2145661]	Ankrd28	25.1	23.8	24.7	27.1	25.5	25.6		24.5333	26.0667		0.0810412	0.190058	0.953156		Q505D1	Serine/threonine-protein phosphatase 6 regulatory ankyrin repeat subunit A	ANR28_MOUSE	Ankrd28	4906	4160	4313	3432	3966	3386		4459.67	3594.67		-0.311169	0.0286083	0.0276071
	ENSMUSG00000052331	ankyrin repeat domain 44 [Source:MGI Symbol;Acc:MGI:3045243]	Ankrd44	90.7	83.8	93	97.5	87.2	88		89.1667	90.9		-0.0114014	0.514574	0.0875047		B2RXR6	Serine/threonine-protein phosphatase 6 regulatory ankyrin repeat subunit B	ANR44_MOUSE	Ankrd44	75639	62347	66817	52496	54264	56106		68267.7	54288.7		-0.326436	0.0279451	0.0153723
	ENSMUSG00000048307	ankyrin repeat domain 46 [Source:MGI Symbol;Acc:MGI:1916089]	Ankrd46	15.5	15.4	14.4	17	15.4	15.8		15.1	16.0667		0.104731	0.185204	0.974386		Q8BTZ5	Ankyrin repeat domain-containing protein 46	ANR46_MOUSE	Ankrd46	5253	1698	4154	3098	3632	2673		3701.67	3134.33		-0.100306	0.227469	0.821121
	ENSMUSG00000031931	ankyrin repeat domain 49 [Source:MGI Symbol;Acc:MGI:1930842]	Ankrd49	29.6	25.5	27.2	28.2	24.4	26		27.4333	26.2		-0.0834433	0.236154	0.76694		Q8VE42	Ankyrin repeat domain-containing protein 49	ANR49_MOUSE	Ankrd49	4628	2811	3228	3036	3038	2823		3555.67	2965.67		-0.229863	0.0979383	0.271839
	ENSMUSG00000014498	ankyrin repeat domain 52 [Source:MGI Symbol;Acc:MGI:2444029]	Ankrd52	89.2	79.9	89	92.4	78.1	75.8		86.0333	82.1		-0.130637	0.0852303	1.62908		Q8BTI7	Serine/threonine-protein phosphatase 6 regulatory ankyrin repeat subunit C	ANR52_MOUSE	Ankrd52	8605	8459	6932	4595	6116	6056		7998.67	5589		-0.522638	0.0279451	0.0143178
	ENSMUSG00000033055	ankyrin repeat domain 54 [Source:MGI Symbol;Acc:MGI:2444209]	Ankrd54	25.5	24.3	25.2	26.8	23.6	21.2		25	23.8667		-0.117337	0.130501	1.27237		Q91WK7	Ankyrin repeat domain-containing protein 54	ANR54_MOUSE	Ankrd54	2880	2699	1537	2211	2234	1613		2372	2019.33		-0.194845	0.157053	0.505657
	ENSMUSG00000024219	ankyrin repeat and SAM domain containing 1 [Source:MGI Symbol;Acc:MGI:2446180]	Anks1	10.3	9	9.7	9.7	8	8.5		9.66667	8.73333		-0.191461	0.0520951	2.0283		P59672;P59672-2	Ankyrin repeat and SAM domain-containing protein 1A;Isoform 2 of Ankyrin repeat and SAM domain-containing protein 1A	ANS1A_MOUSE	Anks1a	520	487	398	311	370	370		468.333	350.333		-0.414412	0.0279451	0.021935
	ENSMUSG00000026199	ankyrin repeat and zinc finger domain containing 1 [Source:MGI Symbol;Acc:MGI:1098746]	Ankzf1	9.7	9.6	9.4	9.5	7.6	7		9.56667	8.03333		-0.321986	0.0357963	2.33952		Q80UU1	Ankyrin repeat and zinc finger domain-containing protein 1	ANKZ1_MOUSE	Ankzf1	3573	3522	3719	3181	3766	3525		3604.67	3490.67		-0.0494363	0.179982	0.605328
	ENSMUSG00000036777	anillin, actin binding protein [Source:MGI Symbol;Acc:MGI:1920174]	Anln	26.2	25.5	27.8	34.7	28.2	28		26.5	30.3		0.110438	0.115448	1.37391		Q8K298	Anillin	ANLN_MOUSE	Anln	8422	5327	7653	5644	4942	6589		7134	5725		-0.300546	0.0758754	0.189408
	ENSMUSG00000037949	anoctamin 10 [Source:MGI Symbol;Acc:MGI:2143103]	Ano10	14.4	13.3	14.5	13.4	14	13.8		14.0667	13.7333		-0.0213212	0.503566	0.109322		Q8BH79;Q8BH79-2	Anoctamin-10;Isoform 2 of Anoctamin-10	ANO10_MOUSE	Ano10	2615	2023	2099	1488	1870	1768		2245.67	1708.67		-0.391493	0.029338	0.0326656
	ENSMUSG00000064210	anoctamin 6 [Source:MGI Symbol;Acc:MGI:2145890]	Ano6	12.9	12.8	13.4	13.8	13.2	12.7		13.0333	13.2333		0.00340233	0.546434	0.0256786		Q6P9J9	Anoctamin-6	ANO6_MOUSE	Ano6	1707	1671	1534	1299	1386	1450		1637.33	1378.33		-0.248364	0.0286659	0.0278824
	ENSMUSG00000032249	acidic (leucine-rich) nuclear phosphoprotein 32 family, member A [Source:MGI Symbol;Acc:MGI:108447]	Anp32a	248.2	237.9	265.7	331.5	281.1	282.9		250.6	298.5		0.185864	0.0143553	3.04763		O35381	Acidic leucine-rich nuclear phosphoprotein 32 family member A	AN32A_MOUSE	Anp32a	576163	551590	651916	617824	600403	550670		593223	589632		-0.00681476	0.253561	0.946947
	ENSMUSG00000028333	acidic (leucine-rich) nuclear phosphoprotein 32 family, member B [Source:MGI Symbol;Acc:MGI:1914878]	Anp32b	1045.5	1045.1	1119	1205.4	1128.9	1130.9		1069.87	1155.07		0.0857132	0.128863	1.28276		Q9EST5;Q9EST5-2	Acidic leucine-rich nuclear phosphoprotein 32 family member B;Isoform 2 of Acidic leucine-rich nuclear phosphoprotein 32 family member B	AN32B_MOUSE	Anp32b	882972	705858	896980	798109	812154	700777		828603	770347		-0.0998423	0.145427	0.45802
	ENSMUSG00000015749	acidic (leucine-rich) nuclear phosphoprotein 32 family, member E [Source:MGI Symbol;Acc:MGI:1913721]	Anp32e	297	285.8	311.8	374.9	334.8	333.1		298.2	347.6		0.178498	0.0141067	3.07246		P97822	Acidic leucine-rich nuclear phosphoprotein 32 family member E	AN32E_MOUSE	Anp32e	361051	298746	307486	300872	303796	263859		322428	289509		-0.153208	0.0833	0.215013
	ENSMUSG00000057411	adenine nucleotide translocase lysine methyltransferase [Source:MGI Symbol;Acc:MGI:2384888]	Antkmt	13.8	14.4	17.6	19.6	14.6	15.4		15.2667	16.5333		-0.048138	0.464663	0.185024		Q501J2	Adenine nucleotide translocase lysine N-methyltransferase	ANKMT_MOUSE	Antkmt	6977	5449	5921	5490	6581	5147		6115.67	5739.33		-0.0918648	0.163614	0.53385
	ENSMUSG00000024659	annexin A1 [Source:MGI Symbol;Acc:MGI:96819]	Anxa1	108.3	130.5	114.6	51.2	105.3	101.4		117.8	85.9667		-0.255269	0.239684	0.75507		P10107	Annexin A1	ANXA1_MOUSE	Anxa1	166182	168916	150186	47946	99798	96275		161761	81339.7		-1.06467	0.0279451	0.0109291
	ENSMUSG00000021866	annexin A11 [Source:MGI Symbol;Acc:MGI:108481]	Anxa11	45.2	43.7	44.5	47.4	46	43		44.4667	45.4667		0.0293966	0.41207	0.297975		P97384	Annexin A11	ANX11_MOUSE	Anxa11	134044	141319	138493	110042	125813	120115		137952	118657		-0.219241	0.0311613	0.0394059
	ENSMUSG00000032231	annexin A2 [Source:MGI Symbol;Acc:MGI:88246]	Anxa2	749.6	814.4	774.7	661	742.6	719.5		779.567	707.7		-0.087071	0.311779	0.537507		P07356	Annexin A2	ANXA2_MOUSE	Anxa2	3085007	2780611	2610913	1681972	2204133	2122860		2.82551e+06	2.00299e+06		-0.502952	0.0279451	0.00929
	ENSMUSG00000029994	annexin A4 [Source:MGI Symbol;Acc:MGI:88030]	Anxa4	19.3	18.3	18.4	12.6	17.6	16.2		18.6667	15.4667		-0.157793	0.155499	1.12279		P97429	Annexin A4	ANXA4_MOUSE	Anxa4	118007	100454	142420	107156	116279	86870		120294	103435		-0.213775	0.0942348	0.25739
	ENSMUSG00000027712	annexin A5 [Source:MGI Symbol;Acc:MGI:106008]	Anxa5	228.7	248	243.8	144.3	197.4	202.2		240.167	181.3		-0.301502	0.0121321	3.19886		P48036	Annexin A5	ANXA5_MOUSE	Anxa5	408157	374445	342843	178578	242945	251672		375148	224398		-0.754232	0.0279451	0.00298958
	ENSMUSG00000018340	annexin A6 [Source:MGI Symbol;Acc:MGI:88255]	Anxa6	992.5	1029.5	1058.3	1185.3	1076.2	1050.8		1026.77	1104.1		0.0702345	0.163933	1.08093		P14824	Annexin A6	ANXA6_MOUSE	Anxa6	2448762	2222103	2033813	1759044	1904181	1847095		2.23489e+06	1.83677e+06		-0.279648	0.0285578	0.0271142
	ENSMUSG00000021814	annexin A7 [Source:MGI Symbol;Acc:MGI:88031]	Anxa7	68.3	75.9	68.8	57.4	67.2	67		71	63.8667		-0.0718171	0.283647	0.617827		Q07076	Annexin A7	ANXA7_MOUSE	Anxa7	142257	136388	140263	89183	113030	108084		139636	103432		-0.440217	0.0279451	0.00710698
	ENSMUSG00000009090	adaptor protein complex AP-1, beta 1 subunit [Source:MGI Symbol;Acc:MGI:1096368]	Ap1b1	75.3	75.5	78.6	77.4	75.1	73.1		76.4667	75.2		-0.0335792	0.378696	0.37052		O35643	AP-1 complex subunit beta-1	AP1B1_MOUSE	Ap1b1	127074	114374	116415	92617	102615	101400		119288	98877.3		-0.270686	0.0279451	0.0201453
	ENSMUSG00000031731	adaptor protein complex AP-1, gamma 1 subunit [Source:MGI Symbol;Acc:MGI:101919]	Ap1g1	99.8	94.5	98	90.4	94.6	90.8		97.4333	91.9333		-0.0589664	0.21364	0.846763		P22892	AP-1 complex subunit gamma-1	AP1G1_MOUSE	Ap1g1	44052	42219	45383	32934	37961	35409		43884.7	35434.7		-0.310347	0.0279451	0.011489
	ENSMUSG00000040701	adaptor protein complex AP-1, gamma 2 subunit [Source:MGI Symbol;Acc:MGI:1328307]	Ap1g2	67.2	63.5	68.6	68.5	59.3	60.5		66.4333	62.7667		-0.12908	0.0551584	1.98561		O88512	AP-1 complex subunit gamma-like 2	AP1G2_MOUSE	Ap1g2	35369	33368	39734	36251	40269	34848		36157	37122.7		0.0391472	0.205825	0.718849
	ENSMUSG00000003033	adaptor-related protein complex AP-1, mu subunit 1 [Source:MGI Symbol;Acc:MGI:102776]	Ap1m1	136	136.5	145.4	174.5	149.9	145.8		139.3	156.733		0.108305	0.0924105	1.56885		P35585	AP-1 complex subunit mu-1	AP1M1_MOUSE	Ap1m1	108793	109856	118147	98758	107438	106477		112265	104224		-0.107256	0.0873835	0.229669
	ENSMUSG00000004849	adaptor protein complex AP-1, sigma 1 [Source:MGI Symbol;Acc:MGI:1098244]	Ap1s1	94	96.4	101.7	108.3	103.2	107.9		97.3667	106.467		0.114732	0.130805	1.27074		P61967	AP-1 complex subunit sigma-1A	AP1S1_MOUSE	Ap1s1	83598	86188	86239	69717	75783	79400		85341.7	74966.7		-0.188924	0.0374968	0.0599447
	ENSMUSG00000031367	adaptor-related protein complex 1, sigma 2 subunit [Source:MGI Symbol;Acc:MGI:1889383]	Ap1s2	14.3	12.3	14.9	16.7	14.5	14.8		13.8333	15.3333		0.0793737	0.304426	0.559271		Q9DB50	AP-1 complex subunit sigma-2	AP1S2_MOUSE	Ap1s2	13690	6441	9740	7693	11386	9819		9957	9632.67		0.000684835	0.263311	0.998242
	ENSMUSG00000054702	adaptor-related protein complex AP-1, sigma 3 [Source:MGI Symbol;Acc:MGI:1891304]	Ap1s3	39.9	34.4	38.7	37.8	38.5	37.4		37.6667	37.9		0.016058	0.508125	0.0988757		Q7TN05	AP-1 complex subunit sigma-3	AP1S3_MOUSE	Ap1s3	8017	6497	5902	4366	5336	5411		6805.33	5037.67		-0.428691	0.0288244	0.0291735
	ENSMUSG00000060279	adaptor-related protein complex 2, alpha 1 subunit [Source:MGI Symbol;Acc:MGI:101921]	Ap2a1	83.1	86.1	87.7	85.9	83.2	77.9		85.6333	82.3333		-0.0713893	0.182992	0.985127		P17426;P17426-2	AP-2 complex subunit alpha-1;Isoform B of AP-2 complex subunit alpha-1	AP2A1_MOUSE	Ap2a1	68568	68814	69708	49549	58827	56532		69030	54969.3		-0.332387	0.0279451	0.0107224
	ENSMUSG00000002957	adaptor-related protein complex 2, alpha 2 subunit [Source:MGI Symbol;Acc:MGI:101920]	Ap2a2	86.6	83.7	85.7	79.6	79.5	74.8		85.3333	77.9667		-0.12405	0.035287	2.35114		P17427	AP-2 complex subunit alpha-2	AP2A2_MOUSE	Ap2a2	45521	41479	39566	28136	33055	31869		42188.7	31020		-0.444578	0.0279451	0.00456334
	ENSMUSG00000035152	adaptor-related protein complex 2, beta 1 subunit [Source:MGI Symbol;Acc:MGI:1919020]	Ap2b1	75.7	77.5	80.3	77.2	78.3	74.6		77.8333	76.7		-0.0208451	0.452072	0.210252		Q9DBG3;Q9DBG3-2	AP-2 complex subunit beta;Isoform 2 of AP-2 complex subunit beta	AP2B1_MOUSE	Ap2b1	90113	84837	87015	65548	76159	74975		87321.7	72227.3		-0.276572	0.0279451	0.0218338
	ENSMUSG00000022841	adaptor-related protein complex 2, mu 1 subunit [Source:MGI Symbol;Acc:MGI:1298405]	Ap2m1	136.6	138.3	138.7	136.4	143.6	139.6		137.867	139.867		0.0484908	0.310603	0.542125		P84091	AP-2 complex subunit mu	AP2M1_MOUSE	Ap2m1	118717	113908	112236	80600	97013	94925		114954	90846		-0.34399	0.0279451	0.0128769
	ENSMUSG00000008036	adaptor-related protein complex 2, sigma 1 subunit [Source:MGI Symbol;Acc:MGI:2141861]	Ap2s1	188.9	224	215.3	219.3	217.2	206.5		209.4	214.333		0.0271001	0.484276	0.149028		P62743	AP-2 complex subunit sigma	AP2S1_MOUSE	Ap2s1	70075	70067	58839	55157	50710	64135		66327	56667.3		-0.229161	0.055256	0.118188
	ENSMUSG00000021686	adaptor-related protein complex 3, beta 1 subunit [Source:MGI Symbol;Acc:MGI:1333879]	Ap3b1	85	85.6	88.2	94.5	94.4	89.3		86.2667	92.7333		0.102812	0.0833688	1.65031		Q9Z1T1	AP-3 complex subunit beta-1	AP3B1_MOUSE	Ap3b1	30305	30697	27568	20197	24791	23116		29523.3	22701.3		-0.3826	0.0279451	0.0110813
	ENSMUSG00000020198	adaptor-related protein complex 3, delta 1 subunit [Source:MGI Symbol;Acc:MGI:107734]	Ap3d1	55.2	51.1	52.2	49.2	47.7	47.7		52.8333	48.2		-0.118799	0.0677272	1.81521		O54774	AP-3 complex subunit delta-1	AP3D1_MOUSE	Ap3d1	27331	22835	22191	16429	19649	18737		24119	18271.7		-0.39839	0.0279451	0.0160982
	ENSMUSG00000021824	adaptor-related protein complex 3, mu 1 subunit [Source:MGI Symbol;Acc:MGI:1929212]	Ap3m1	40.1	38.9	39.7	33.4	35.3	37.6		39.5667	35.4333		-0.11722	0.107791	1.42861		Q9JKC8	AP-3 complex subunit mu-1	AP3M1_MOUSE	Ap3m1	39375	38898	45863	31433	25231	23926		41378.7	26863.3		-0.629417	0.0279451	0.00344266
	ENSMUSG00000024480	adaptor-related protein complex 3, sigma 1 subunit [Source:MGI Symbol;Acc:MGI:1337062]	Ap3s1	53.7	50.5	52.7	52.4	54.3	51.8		52.3	52.8333		0.0351853	0.40518	0.31171		Q9DCR2	AP-3 complex subunit sigma-1	AP3S1_MOUSE	Ap3s1	41381	37655	35381	25844	29729	30104		38139	28559		-0.41771	0.0279451	0.00688405
	ENSMUSG00000032952	adaptor-related protein complex AP-4, beta 1 [Source:MGI Symbol;Acc:MGI:1337130]	Ap4b1	2.3	1.6	1.9	1.4	1.4	1.7		1.93333	1.5		-0.289264	0.224762	0.803852		Q9WV76	AP-4 complex subunit beta-1	AP4B1_MOUSE	Ap4b1	1227	1384	1019	469	840	529		1210	612.667		-1.01789	0.0279451	0.00589982
	ENSMUSG00000001998	adaptor-related protein complex AP-4, epsilon 1 [Source:MGI Symbol;Acc:MGI:1336993]	Ap4e1	13	12.3	12.1	12.2	11.4	11.8		12.4667	11.8		-0.0673544	0.254942	0.705464		Q80V94	AP-4 complex subunit epsilon-1	AP4E1_MOUSE	Ap4e1	1040	792	765	841	708	613		865.667	720.667		-0.262577	0.0721671	0.175842
	ENSMUSG00000019518	adaptor-related protein complex AP-4, mu 1 [Source:MGI Symbol;Acc:MGI:1337063]	Ap4m1	13.9	12.1	12	12.8	12.3	11.7		12.6667	12.2667		-0.0174581	0.51184	0.0926905		Q9JKC7	AP-4 complex subunit mu-1	AP4M1_MOUSE	Ap4m1	901	989	870	630	737	849		920	738.667		-0.325244	0.0332936	0.0464081
	ENSMUSG00000020955	adaptor-related protein complex AP-4, sigma 1 [Source:MGI Symbol;Acc:MGI:1337065]	Ap4s1	48.2	48.2	55.2	52.8	49	47.7		50.5333	49.8333		-0.0796486	0.344083	0.455151		Q9WVL1	AP-4 complex subunit sigma-1	AP4S1_MOUSE	Ap4s1	3715	2984	2812	2250	2683	2244		3170.33	2392.33		-0.400787	0.0287318	0.0281185
	ENSMUSG00000049562	adaptor-related protein complex 5, beta 1 subunit [Source:MGI Symbol;Acc:MGI:2685808]	Ap5b1	11.3	10.1	10.5	11.3	10.8	10.7		10.6333	10.9333		0.0510238	0.454849	0.203961		Q3TAP4	AP-5 complex subunit beta-1	AP5B1_MOUSE	Ap5b1	86	150	168	142	170	161		134.667	157.667		0.280885	0.111213	0.323179
	ENSMUSG00000036291	adaptor-related protein complex 5, mu 1 subunit [Source:MGI Symbol;Acc:MGI:1921635]	Ap5m1	11.2	9.6	11	11.7	10.5	10.1		10.6	10.7667		-0.0208293	0.486574	0.144594		Q8BJ63	AP-5 complex subunit mu-1	AP5M1_MOUSE	Ap5m1	1006	704	614	548	502	611		774.667	553.667		-0.457112	0.0376369	0.0604171
	ENSMUSG00000039623	adaptor-related protein complex 5, zeta 1 subunit [Source:MGI Symbol;Acc:MGI:1924908]	Ap5z1	11.1	8.6	9.9	8.6	8.2	7.4		9.86667	8.06667		-0.307755	0.0185713	2.84263		Q3U829	AP-5 complex subunit zeta-1	AP5Z1_MOUSE	Ap5z1	549	559	520	374	449	452		542.667	425		-0.357363	0.0279451	0.013137
	ENSMUSG00000019979	apoptotic peptidase activating factor 1 [Source:MGI Symbol;Acc:MGI:1306796]	Apaf1	32.1	30	32.1	31.6	31.5	30.5		31.4	31.2		-0.00588601	0.539364	0.0400875		O88879	Apoptotic protease-activating factor 1	APAF_MOUSE	Apaf1	18877	16461	17082	12763	14817	13846		17473.3	13808.7		-0.339823	0.0279451	0.0128639
	ENSMUSG00000026786	amyloid beta (A4) precursor protein-binding, family B, member 1 interacting protein [Source:MGI Symbol;Acc:MGI:1861354]	Apbb1ip	78.4	77.7	81.7	77	74.5	75.3		79.2667	75.6		-0.0742408	0.160719	1.09558		Q8R5A3	Amyloid beta A4 precursor protein-binding family B member 1-interacting protein	AB1IP_MOUSE	Apbb1ip	35786	38722	34269	25514	29873	29384		36259	28257		-0.36143	0.0279451	0.0106721
	ENSMUSG00000032590	acylpeptide hydrolase [Source:MGI Symbol;Acc:MGI:88041]	Apeh	33.3	32.4	32	31.3	31.4	30		32.5667	30.9		-0.0530434	0.296411	0.58106		Q8R146;Q8R146-2	Acylamino-acid-releasing enzyme;Isoform 2 of Acylamino-acid-releasing enzyme	APEH_MOUSE	Apeh	44536	46255	44238	33070	38318	39251		45009.7	36879.7		-0.291198	0.0279451	0.0208951
	ENSMUSG00000035960	apurinic/apyrimidinic endonuclease 1 [Source:MGI Symbol;Acc:MGI:88042]	Apex1	159.4	170.6	170.1	198.4	168.8	170.3		166.7	179.167		0.0532751	0.351773	0.435983		P28352	DNA-(apurinic or apyrimidinic site) endonuclease	APEX1_MOUSE	Apex1	141601	122459	121147	108845	112714	102056		128402	107872		-0.248862	0.0317093	0.0410599
	ENSMUSG00000027193	apoptosis inhibitor 5 [Source:MGI Symbol;Acc:MGI:1888993]	Api5	182.6	180.3	188	211.5	192.3	194.9		183.633	199.567		0.0948486	0.0966151	1.52757		O35841	Apoptosis inhibitor 5	API5_MOUSE	Api5	188589	190727	190883	170114	172942	159242		190066	167433		-0.183811	0.0333057	0.0465822
	ENSMUSG00000010911	APAF1 interacting protein [Source:MGI Symbol;Acc:MGI:1926788]	Apip	55.4	66.6	59.3	56.7	56.4	53.2		60.4333	55.4333		-0.106358	0.259757	0.689589		Q9WVQ5	Methylthioribulose-1-phosphate dehydratase	MTNB_MOUSE	Apip	45008	47700	46845	33233	39782	37812		46517.7	36942.3		-0.336163	0.0279451	0.0119368
	ENSMUSG00000033096	adipocyte plasma membrane associated protein [Source:MGI Symbol;Acc:MGI:1919131]	Apmap	68.6	72.9	74.7	70.6	70.5	75.4		72.0667	72.1667		0.011089	0.523762	0.0703623		Q9D7N9	Adipocyte plasma membrane-associated protein	APMAP_MOUSE	Apmap	45486	74951	63154	42913	55906	39620		61197	46146.3		-0.393199	0.0579884	0.127679
	ENSMUSG00000009585	apolipoprotein B mRNA editing enzyme, catalytic polypeptide 3 [Source:MGI Symbol;Acc:MGI:1933111]	Apobec3	68.4	63.6	70.7	76	69.2	66.5		67.5667	70.5667		0.0221887	0.460714	0.192863		Q99J72;Q99J72-4	DNA dC->dU-editing enzyme APOBEC-3;Isoform 4 of DNA dC->dU-editing enzyme APOBEC-3	ABEC3_MOUSE	Apobec3	164443	154485	151705	120000	138383	135788		156878	131390		-0.257755	0.0288244	0.0288004
	ENSMUSG00000042759	apolipoprotein B receptor [Source:MGI Symbol;Acc:MGI:2176230]	Apobr	74.5	75.7	72.9	40.5	55.3	53		74.3667	49.6		-0.470547	0.00244421	4.54677		Q8VBT6	Apolipoprotein B receptor	APOBR_MOUSE	Apobr	13106	14481	14772	7540	10825	10169		14119.7	9511.33		-0.585358	0.0279451	0.00904081
	ENSMUSG00000079508	apolipoprotein O [Source:MGI Symbol;Acc:MGI:1915566]	Apoo	18.3	18.8	19.7	17.4	22.5	21.5		18.9333	20.4667		0.178686	0.177509	1.01264		Q9DCZ4;Q9DCZ4-2;Q9DCZ4-3	MICOS complex subunit Mic26;Isoform 2 of MICOS complex subunit Mic26;Isoform 3 of MICOS complex subunit Mic26	MIC26_MOUSE	Apoo	28636	25423	24461	21158	22068	21714		26173.3	21646.7		-0.270888	0.0279782	0.022315
	ENSMUSG00000025525	apolipoprotein O-like [Source:MGI Symbol;Acc:MGI:1915367]	Apool	17.8	18.9	18.4	23	20.5	19.8		18.3667	21.1		0.169238	0.0502411	2.05707		Q78IK4	MICOS complex subunit Mic27	MIC27_MOUSE	Apool	40958	33743	42287	39642	41772	39423		38996	40279		0.0532186	0.188608	0.642912
	ENSMUSG00000018481	amyloid beta precursor protein (cytoplasmic tail) binding protein 2 [Source:MGI Symbol;Acc:MGI:1914134]	Appbp2	58.4	59	59.9	58.6	59.9	58.3		59.1	58.9333		0.010517	0.505611	0.104636		Q9DAX9	Amyloid protein-binding protein 2	APBP2_MOUSE	Appbp2	158	136	74	62	78	70		122.667	70		-0.743938	0.0326056	0.0439874
	ENSMUSG00000040760	adaptor protein, phosphotyrosine interaction, PH domain and leucine zipper containing 1 [Source:MGI Symbol;Acc:MGI:1920243]	Appl1	42.6	41	42.7	46.8	44.8	42.7		42.1	44.7667		0.0780828	0.133852	1.25107		Q8K3H0	DCC-interacting protein 13-alpha	DP13A_MOUSE	Appl1	342545	380833	302433	298520	336997	329881		341937	321799		-0.0831862	0.152496	0.486995
	ENSMUSG00000020263	adaptor protein, phosphotyrosine interaction, PH domain and leucine zipper containing 2 [Source:MGI Symbol;Acc:MGI:2384914]	Appl2	9.9	9	8.5	7	7.7	7.9		9.13333	7.53333		-0.184101	0.167342	1.06477		Q8K3G9	DCC-interacting protein 13-beta	DP13B_MOUSE	Appl2	472	405	469	194	277	326		448.667	265.667		-0.785161	0.0279451	0.00810781
	ENSMUSG00000006589	adenine phosphoribosyl transferase [Source:MGI Symbol;Acc:MGI:88061]	Aprt	244	253	251.3	233.6	245.8	226.4		249.433	235.267		-0.0661605	0.299214	0.574734		P08030	Adenine phosphoribosyltransferase	APT_MOUSE	Aprt	575903	568091	508129	351049	432290	450888		550708	411409		-0.426901	0.0279451	0.0131643
	ENSMUSG00000028411	aprataxin [Source:MGI Symbol;Acc:MGI:1913658]	Aptx	10.4	12.2	11.5	10.8	12.1	12.1		11.3667	11.6667		0.0852393	0.305182	0.557399		Q7TQC5;Q7TQC5-3	Aprataxin;Isoform 3 of Aprataxin	APTX_MOUSE	Aptx	2442	2343	2347	2030	2266	2161		2377.33	2152.33		-0.144637	0.0543976	0.115105
	ENSMUSG00000040383	aquarius [Source:MGI Symbol;Acc:MGI:1276102]	Aqr	47.4	43.5	48	51.4	47.6	46.1		46.3	48.3667		0.034217	0.369804	0.391934		Q8CFQ3	RNA helicase aquarius	AQR_MOUSE	Aqr	30018	29041	26216	22129	23427	24295		28425	23283.7		-0.286532	0.0279451	0.0178438
	ENSMUSG00000001127	Araf proto-oncogene, serine/threonine kinase [Source:MGI Symbol;Acc:MGI:88065]	Araf	44.8	43.3	43.4	40.1	38.4	38.3		43.8333	38.9333		-0.164102	0.0256924	2.59935		P04627	Serine/threonine-protein kinase A-Raf	ARAF_MOUSE	Araf	15642	17157	16698	12435	13770	12407		16499	12870.7		-0.358936	0.0279451	0.00552028
	ENSMUSG00000032812	ArfGAP with RhoGAP domain, ankyrin repeat and PH domain 1 [Source:MGI Symbol;Acc:MGI:1916960]	Arap1	33.2	31.4	33.6	23.8	26.3	23.9		32.7333	24.6667		-0.381581	0.000480077	6.09869		Q4LDD4;Q4LDD4-2	Arf-GAP with Rho-GAP domain, ANK repeat and PH domain-containing protein 1;Isoform 2 of Arf-GAP with Rho-GAP domain, ANK repeat and PH domain-containing protein 1	ARAP1_MOUSE	Arap1	27639	21973	15820	12746	17921	19895		21810.7	16854		-0.360028	0.0822346	0.211306
	ENSMUSG00000037999	ArfGAP with RhoGAP domain, ankyrin repeat and PH domain 2 [Source:MGI Symbol;Acc:MGI:2684416]	Arap2	28.4	25.2	27.9	36.9	29.3	28.1		27.1667	31.4333		0.120242	0.258431	0.693719		Q8BZ05	Arf-GAP with Rho-GAP domain, ANK repeat and PH domain-containing protein 2	ARAP2_MOUSE	Arap2	841	594	448	429	499	505		627.667	477.667		-0.349922	0.0749169	0.184818
	ENSMUSG00000032096	archain 1 [Source:MGI Symbol;Acc:MGI:2387591]	Arcn1	88.3	88.3	89.3	82	89.1	86.7		88.6333	85.9333		-0.0070468	0.528399	0.0621362		Q5XJY5	Coatomer subunit delta	COPD_MOUSE	Arcn1	212864	207277	217418	153930	180863	177028		212520	170607		-0.320271	0.0279451	0.0127216
	ENSMUSG00000048076	ADP-ribosylation factor 1 [Source:MGI Symbol;Acc:MGI:99431]	Arf1	747.2	787.9	785.9	703.3	751.3	758.6		773.667	737.733		-0.0359453	0.380445	0.365994		P84078	ADP-ribosylation factor 1	ARF1_MOUSE	Arf1	1639688	1477457	1445532	1113283	1264805	1188086		1.52089e+06	1.18872e+06		-0.355254	0.0279451	0.0084603
	ENSMUSG00000021877	ADP-ribosylation factor 4 [Source:MGI Symbol;Acc:MGI:99433]	Arf4	106.9	114.1	113.5	114.1	121.1	115.2		111.5	116.8		0.0887336	0.159671	1.10058		P61750	ADP-ribosylation factor 4	ARF4_MOUSE	Arf4	38554	38269	39765	30548	33971	33754		38862.7	32757.7		-0.248039	0.0279451	0.0207567
	ENSMUSG00000020440	ADP-ribosylation factor 5 [Source:MGI Symbol;Acc:MGI:99434]	Arf5	178.7	197.7	193.5	225.1	193.6	201.1		189.967	206.6		0.0800613	0.256598	0.700435		P84084	ADP-ribosylation factor 5	ARF5_MOUSE	Arf5	146306	151427	173778	137003	145210	139244		157170	140486		-0.158298	0.0624692	0.141915
	ENSMUSG00000044147	ADP-ribosylation factor 6 [Source:MGI Symbol;Acc:MGI:99435]	Arf6	888.3	888.2	943.2	802.4	866.2	881.1		906.567	849.9		-0.0656911	0.250616	0.72031		P62331	ADP-ribosylation factor 6	ARF6_MOUSE	Arf6	342277	333509	332888	221035	278751	285665		336225	261817		-0.370117	0.0279451	0.0201985
	ENSMUSG00000027575	ADP-ribosylation factor GTPase activating protein 1 [Source:MGI Symbol;Acc:MGI:2183559]	Arfgap1	38.6	33.9	36.1	35.7	30.3	32.6		36.2	32.8667		-0.165642	0.0375687	2.30713		Q9EPJ9	ADP-ribosylation factor GTPase-activating protein 1	ARFG1_MOUSE	Arfgap1	16960	19316	17410	13472	15978	17016		17895.3	15488.7		-0.212969	0.0547185	0.116335
	ENSMUSG00000027255	ADP-ribosylation factor GTPase activating protein 2 [Source:MGI Symbol;Acc:MGI:1924288]	Arfgap2	79.8	82.2	81.4	86.6	83.2	83.7		81.1333	84.5		0.0614186	0.206414	0.877909		Q99K28;Q99K28-2	ADP-ribosylation factor GTPase-activating protein 2;Isoform 2 of ADP-ribosylation factor GTPase-activating protein 2	ARFG2_MOUSE	Arfgap2	44955	46281	45199	35098	40686	40659		45478.3	38814.3		-0.231899	0.0316535	0.0408951
	ENSMUSG00000054277	ADP-ribosylation factor GTPase activating protein 3 [Source:MGI Symbol;Acc:MGI:1913501]	Arfgap3	16.6	17.1	17.1	12.7	14.5	15.5		16.9333	14.2333		-0.188012	0.0692656	1.79647		Q9D8S3	ADP-ribosylation factor GTPase-activating protein 3	ARFG3_MOUSE	Arfgap3	1626	1624	1700	948	1348	1303		1650	1199.67		-0.476932	0.0279451	0.0188584
	ENSMUSG00000067851	ADP-ribosylation factor guanine nucleotide-exchange factor 1(brefeldin A-inhibited) [Source:MGI Symbol;Acc:MGI:2442988]	Arfgef1	59	55.4	60.9	61.2	59.2	57.9		58.4333	59.4333		0.0092352	0.519133	0.0792663		G3X9K3	Brefeldin A-inhibited guanine nucleotide-exchange protein 1	BIG1_MOUSE	Arfgef1	11025	9163	7782	6101	6919	6733		9323.33	6584.33		-0.48927	0.0279451	0.0144575
	ENSMUSG00000074582	ADP-ribosylation factor guanine nucleotide-exchange factor 2 (brefeldin A-inhibited) [Source:MGI Symbol;Acc:MGI:2139354]	Arfgef2	27.8	24.4	26.7	31.3	25.4	26.9		26.3	27.8667		0.0284681	0.44296	0.229835		A2A5R2	Brefeldin A-inhibited guanine nucleotide-exchange protein 2	BIG2_MOUSE	Arfgef2	5476	4628	4047	3335	3682	3387		4717	3468		-0.43406	0.0279451	0.0148909
	ENSMUSG00000019852	ARFGEF family member 3 [Source:MGI Symbol;Acc:MGI:106387]	Arfgef3	12.1	10.3	12.4	8.5	10.2	9.3		11.6	9.33333		-0.279061	0.0220778	2.72198		Q3UGY8	Brefeldin A-inhibited guanine nucleotide-exchange protein 3	BIG3_MOUSE	Arfgef3	141	112	115	53	89	81		122.667	74.3333		-0.749631	0.0279451	0.013736
	ENSMUSG00000074513	ADP-ribosylation factor interacting protein 1 [Source:MGI Symbol;Acc:MGI:1277120]	Arfip1	5.7	6.5	6.5	5	6.1	5.8		6.23333	5.63333		-0.100425	0.384273	0.35802		A2RSX9	ADP-ribosylation factor interacting protein 1	A2RSX9_MOUSE	Arfip1	29048	32863	30660	21065	27987	26897		30857	25316.3		-0.294737	0.0394253	0.0661802
	ENSMUSG00000030881	ADP-ribosylation factor interacting protein 2 [Source:MGI Symbol;Acc:MGI:1924182]	Arfip2	23.7	22.1	23.6	24.3	21.7	21.9		23.1333	22.6333		-0.0634476	0.288072	0.604353		Q8K221	Arfaptin-2	ARFP2_MOUSE	Arfip2	1370	1202	1160	918	1106	1052		1244	1025.33		-0.279562	0.0331457	0.0458364
	ENSMUSG00000038671	ADP-ribosylation factor related protein 1 [Source:MGI Symbol;Acc:MGI:1923938]	Arfrp1	39.5	35.5	37.9	36.5	34.7	33.9		37.6333	35.0333		-0.109194	0.0972737	1.51892		Q8BXL7	ADP-ribosylation factor-related protein 1	ARFRP_MOUSE	Arfrp1	12786	14816	15230	10423	12986	13071		14277.3	12160		-0.23518	0.0544471	0.115281
	ENSMUSG00000040459	arginine and glutamate rich 1 [Source:MGI Symbol;Acc:MGI:2442985]	Arglu1	87.3	68.7	74.4	78	67.4	63.8		76.8	69.7333		-0.161788	0.16943	1.05345		Q3UL36	Arginine and glutamate-rich protein 1	ARGL1_MOUSE	Arglu1	11771	12558	12680	10629	10291	10777		12336.3	10565.7		-0.223018	0.0283184	0.0240005
	ENSMUSG00000027247	Rho GTPase activating protein 1 [Source:MGI Symbol;Acc:MGI:2445003]	Arhgap1	96.7	96.9	99	104.8	93.7	91.1		97.5333	96.5333		-0.0490122	0.286189	0.610026		Q5FWK3	Rho GTPase-activating protein 1	RHG01_MOUSE	Arhgap1	102892	99625	87939	71770	81944	83630		96818.7	79114.7		-0.291343	0.0291707	0.0316054
	ENSMUSG00000041219	Rho GTPase activating protein 11A [Source:MGI Symbol;Acc:MGI:2444300]	Arhgap11a	110.9	108.8	117.7	134.2	117.9	115		112.467	122.367		0.0687493	0.226789	0.79694		Q80Y19	Rho GTPase-activating protein 11A	RHGBA_MOUSE	Arhgap11a	2928	1714	2132	2175	2111	2106		2258	2130.67		-0.0486809	0.225702	0.811876
	ENSMUSG00000041225	Rho GTPase activating protein 12 [Source:MGI Symbol;Acc:MGI:1922665]	Arhgap12	10.4	9.8	9.8	10	9.9	9.3		10	9.73333		-0.0200678	0.50453	0.107398		Q8C0D4	Rho GTPase-activating protein 12	RHG12_MOUSE	Arhgap12	496	1215	658	298	584	1250		789.667	710.667		-0.288725	0.187558	0.638513
	ENSMUSG00000049744	Rho GTPase activating protein 15 [Source:MGI Symbol;Acc:MGI:1923367]	Arhgap15	24.6	23.4	25.4	33.2	30.2	26.6		24.4667	30		0.240956	0.0145859	3.03247		Q811M1	Rho GTPase-activating protein 15	RHG15_MOUSE	Arhgap15	12741	12733	13876	14858	14431	13351		13116.7	14213.3		0.115572	0.0840909	0.217929
	ENSMUSG00000030766	Rho GTPase activating protein 17 [Source:MGI Symbol;Acc:MGI:1917747]	Arhgap17	20.6	19.3	21.1	18.1	16.1	18.2		20.3333	17.4667		-0.245014	0.0126444	3.16162		Q3UIA2;Q3UIA2-2;Q3UIA2-3;Q3UIA2-4	Rho GTPase-activating protein 17;Isoform 2 of Rho GTPase-activating protein 17;Isoform 3 of Rho GTPase-activating protein 17;Isoform 4 of Rho GTPase-activating protein 17	RHG17_MOUSE	Arhgap17	11161	11052	10744	7919	8733	8744		10985.7	8465.33		-0.377333	0.0279451	0.00302462
	ENSMUSG00000039031	Rho GTPase activating protein 18 [Source:MGI Symbol;Acc:MGI:1921160]	Arhgap18	42.2	47	45.7	38	41.7	41.3		44.9667	40.3333		-0.117416	0.133979	1.24899		Q8K0Q5	Rho GTPase-activating protein 18	RHG18_MOUSE	Arhgap18	21365	22138	21898	14665	17189	18582		21800.3	16812		-0.381602	0.0279451	0.011806
	ENSMUSG00000025154	Rho GTPase activating protein 19 [Source:MGI Symbol;Acc:MGI:1918335]	Arhgap19	68.3	65.3	71.3	86.5	74.9	72.3		68.3	77.9		0.129594	0.11944	1.34287		Q8BRH3;Q8BRH3-2	Rho GTPase-activating protein 19;Isoform 2 of Rho GTPase-activating protein 19	RHG19_MOUSE	Arhgap19	570	586	703	717	698	627		619.667	680.667		0.139426	0.0961054	0.265014
	ENSMUSG00000036591	Rho GTPase activating protein 21 [Source:MGI Symbol;Acc:MGI:1918685]	Arhgap21	29.9	28.8	30	29.9	28	27.3		29.5667	28.4		-0.0769481	0.199007	0.912283		Q6DFV3	Rho GTPase-activating protein 21	RHG21_MOUSE	Arhgap21	2347	2391	1970	1909	1704	1808		2236	1807		-0.303497	0.0288244	0.029068
	ENSMUSG00000030047	Rho GTPase activating protein 25 [Source:MGI Symbol;Acc:MGI:2443687]	Arhgap25	24.4	23.8	24.1	34.8	26.3	28.1		24.1	29.7333		0.227348	0.0305203	2.46445		Q8BYW1	Rho GTPase-activating protein 25	RHG25_MOUSE	Arhgap25	20300	16316	15480	16924	17132	16218		17365.3	16758		-0.0416042	0.210828	0.741285
	ENSMUSG00000036452	Rho GTPase activating protein 26 [Source:MGI Symbol;Acc:MGI:1918552]	Arhgap26	14.1	15.7	16.6	17.6	17.7	15.6		15.4667	16.9667		0.0952624	0.21232	0.851391		Q6ZQ82	Rho GTPase-activating protein 26	RHG26_MOUSE	Arhgap26	3155	3336	3414	3262	2944	3175		3301.67	3127		-0.0789771	0.12302	0.367596
	ENSMUSG00000034255	Rho GTPase activating protein 27 [Source:MGI Symbol;Acc:MGI:1916903]	Arhgap27	33.9	32.3	35.7	37.2	33.5	31.4		33.9667	34.0333		-0.0512242	0.383703	0.359784		A2AB59-2	Isoform 2 of Rho GTPase-activating protein 27	RHG27_MOUSE	Arhgap27	4022	4346	4183	3748	4253	3937		4183.67	3979.33		-0.0734802	0.135044	0.416027
	ENSMUSG00000048865	Rho GTPase activating protein 30 [Source:MGI Symbol;Acc:MGI:2684948]	Arhgap30	183.7	182.4	182.5	175.8	171.8	175.8		182.867	174.467		-0.0549847	0.224753	0.804183		Q640N3;Q640N3-2	Rho GTPase-activating protein 30;Isoform 2 of Rho GTPase-activating protein 30	RHG30_MOUSE	Arhgap30	27205	26077	31333	23722	25998	24787		28205	24835.7		-0.180041	0.0552605	0.118384
	ENSMUSG00000031389	Rho GTPase activating protein 4 [Source:MGI Symbol;Acc:MGI:2159577]	Arhgap4	50.2	46.2	50.6	54.3	47.7	44		49	48.6667		-0.067098	0.241504	0.748587		Q80Z68	Rho GTPase-activating protein 4	Q80Z68_MOUSE	Arhgap4	24070	23758	23024	17942	20974	19052		23617.3	19322.7		-0.292301	0.0279451	0.0155091
	ENSMUSG00000035697	Rho GTPase activating protein 45 [Source:MGI Symbol;Acc:MGI:1917969]	Arhgap45	351.9	330.9	350.1	369.9	311.3	299.8		344.3	327		-0.133541	0.0545278	1.99238		Q3TBD2	Rho GTPase-activating protein 45	HMHA1_MOUSE	Arhgap45	62174	59555	63472	51900	54729	55438		61733.7	54022.3		-0.19258	0.0318172	0.0416318
	ENSMUSG00000040345	Rho GTPase activating protein 9 [Source:MGI Symbol;Acc:MGI:2143764]	Arhgap9	191.1	182.5	192.5	205.2	177.8	175		188.7	186		-0.066587	0.168783	1.056		Q1HDU4;Q8QZW8	ArhGAP9;Rho GTPase-activating protein 9	Q1HDU4_MOUSE;Q8QZW8_MOUSE	Arhgap9	19068	17456	18952	15244	17298	16340		18492	16294		-0.183324	0.0431152	0.0785296
	ENSMUSG00000025132	Rho GDP dissociation inhibitor (GDI) alpha [Source:MGI Symbol;Acc:MGI:2178103]	Arhgdia	1572.1	1644.6	1648.1	1676	1603.9	1565.1		1621.6	1615		-0.0153944	0.4873	0.142666		Q99PT1	Rho GDP-dissociation inhibitor 1	GDIR1_MOUSE	Arhgdia	3037576	2865128	3005735	2269933	2699017	2769064		2.96948e+06	2579338		-0.208252	0.0457417	0.087004
	ENSMUSG00000030220	Rho, GDP dissociation inhibitor (GDI) beta [Source:MGI Symbol;Acc:MGI:101940]	Arhgdib	1726.9	1821.7	1758.8	1814.8	1799	1787.9		1769.13	1800.57		0.0402917	0.345512	0.450824		Q61599	Rho GDP-dissociation inhibitor 2	GDIR2_MOUSE	Arhgdib	2138242	2038040	2174458	1827834	2022053	1973241		2.11691e+06	1.94104e+06		-0.125913	0.0689649	0.164112
	ENSMUSG00000004568	rho/rac guanine nucleotide exchange factor (GEF) 18 [Source:MGI Symbol;Acc:MGI:2142567]	Arhgef18	6.3	4.9	6.8	13.1	6.5	7.2		6	8.93333		0.225978	0.183848	0.981325		Q6P9R4	Rho guanine nucleotide exchange factor 18	ARHGI_MOUSE	Arhgef18	6046	6129	7252	6653	5343	4961		6475.67	5652.33		-0.202575	0.0797443	0.202801
	ENSMUSG00000028059	rho/rac guanine nucleotide exchange factor (GEF) 2 [Source:MGI Symbol;Acc:MGI:103264]	Arhgef2	72.9	68.8	71.8	59.1	61.4	61		71.1667	60.5		-0.207176	0.00320021	4.30959		Q60875;Q60875-4;Q60875-5	Rho guanine nucleotide exchange factor 2;Isoform 4 of Rho guanine nucleotide exchange factor 2;Isoform 5 of Rho guanine nucleotide exchange factor 2	ARHG2_MOUSE	Arhgef2	67981	60012	68124	48276	54785	51090		65372.3	51383.7		-0.346806	0.0279451	0.0101975
	ENSMUSG00000031133	Rac/Cdc42 guanine nucleotide exchange factor (GEF) 6 [Source:MGI Symbol;Acc:MGI:1920591]	Arhgef6	113.1	110.7	112.6	103.3	108.9	105.6		112.133	105.933		-0.0533209	0.254582	0.70651		Q8K4I3	Rho guanine nucleotide exchange factor 6	ARHG6_MOUSE	Arhgef6	53396	49492	50839	38685	45436	43032		51242.3	42384.3		-0.276281	0.0281378	0.0230645
	ENSMUSG00000031511	Rho guanine nucleotide exchange factor (GEF7) [Source:MGI Symbol;Acc:MGI:1860493]	Arhgef7	30.4	32	30.4	21.7	26.9	26.8		30.9333	25.1333		-0.208025	0.0254303	2.60721		Q9ES28-8	Isoform H of Rho guanine nucleotide exchange factor 7	ARHG7_MOUSE	Arhgef7	25649	24456	24936	21001	21028	21536		25013.7	21188.3		-0.239267	0.0279451	0.0139687
	ENSMUSG00000007880	AT rich interactive domain 1A (SWI-like) [Source:MGI Symbol;Acc:MGI:1935147]	Arid1a	88.9	78.8	86.1	101.8	79.8	79.3		84.6	86.9667		-0.0421418	0.388783	0.34694		A2BH40	AT-rich interactive domain-containing protein 1A	ARI1A_MOUSE	Arid1a	70310	38515	55012	44736	81473	79481		54612.3	68563.3		0.319824	0.118953	0.351926
	ENSMUSG00000069729	AT rich interactive domain 1B (SWI-like) [Source:MGI Symbol;Acc:MGI:1926129]	Arid1b	15.9	16.5	18	22.2	18.9	17.7		16.8	19.6		0.136852	0.0928829	1.56466		E9Q4N7	AT-rich interactive domain-containing protein 1B	ARI1B_MOUSE	Arid1b	1158	1067	1300	1204	1098	1037		1175	1113		-0.0761926	0.157435	0.507668
	ENSMUSG00000033237	AT rich interactive domain 2 (ARID, RFX-like) [Source:MGI Symbol;Acc:MGI:1924294]	Arid2	25.9	24.2	25.9	29.2	24.7	24		25.3333	25.9667		-0.0242611	0.442015	0.231478		E9Q7E2	AT-rich interactive domain-containing protein 2	ARID2_MOUSE	Arid2	7501	1687	2166	1700	3888	5676		3784.67	3754.67		0.150954	0.230086	0.834325
	ENSMUSG00000019564	AT rich interactive domain 3A (BRIGHT-like) [Source:MGI Symbol;Acc:MGI:1328360]	Arid3a	18.8	18	18.9	19.7	18.9	17.1		18.5667	18.5667		-0.0225703	0.479544	0.157628		Q62431	AT-rich interactive domain-containing protein 3A	ARI3A_MOUSE	Arid3a	990	1195	1280	922	1092	776		1155	930		-0.318238	0.0491272	0.0972868
	ENSMUSG00000048118	AT rich interactive domain 4A (RBP1-like) [Source:MGI Symbol;Acc:MGI:2444354]	Arid4a	32.8	33.9	30.9	37	35.9	31.1		32.5333	34.6667		0.100337	0.263602	0.677538		F8VPQ2	AT-rich interactive domain-containing protein 4A	ARI4A_MOUSE	Arid4a	2440	2264	2272	2090	2336	2082		2325.33	2169.33		-0.101402	0.10035	0.280479
	ENSMUSG00000039219	AT rich interactive domain 4B (RBP1-like) [Source:MGI Symbol;Acc:MGI:2137512]	Arid4b	12.3	12.3	11.6	13.1	12.7	11.6		12.0667	12.4667		0.055218	0.352256	0.43454		A2CG63;A2CG63-2	AT-rich interactive domain-containing protein 4B;Isoform 2 of AT-rich interactive domain-containing protein 4B	ARI4B_MOUSE	Arid4b	333	342	307	279	361	352		327.333	330.667		0.00669408	0.255792	0.958639
	ENSMUSG00000037447	AT rich interactive domain 5A (MRF1-like) [Source:MGI Symbol;Acc:MGI:2443039]	Arid5a	46.7	47.6	46.7	56.7	49.3	47		47	51		0.0787623	0.275243	0.643364		Q3U108;Q3U108-2;Q3U108-3	AT-rich interactive domain-containing protein 5A;Isoform 2 of AT-rich interactive domain-containing protein 5A;Isoform 3 of AT-rich interactive domain-containing protein 5A	ARI5A_MOUSE	Arid5a	2474	2386	2566	2491	2525	2448		2475.33	2488		0.00788375	0.247177	0.916671
	ENSMUSG00000025234	ariadne RBR E3 ubiquitin protein ligase 1 [Source:MGI Symbol;Acc:MGI:1344363]	Arih1	77.5	73.1	76	81.5	77	74.7		75.5333	77.7333		0.0315068	0.380129	0.366928		Q9Z1K5	E3 ubiquitin-protein ligase ARIH1	ARI1_MOUSE	Arih1	36668	33615	39294	28329	32441	28971		36525.7	29913.7		-0.287743	0.0285578	0.0271225
	ENSMUSG00000064145	ariadne RBR E3 ubiquitin protein ligase 2 [Source:MGI Symbol;Acc:MGI:1344361]	Arih2	33.4	33.3	34	33.3	33.5	33.9		33.5667	33.5667		0.0156594	0.503566	0.109348		Q9Z1K6	E3 ubiquitin-protein ligase ARIH2	ARI2_MOUSE	Arih2	6090	6171	6369	4672	5136	5275		6210	5027.67		-0.306386	0.0279451	0.00942329
	ENSMUSG00000060904	ADP-ribosylation factor-like 1 [Source:MGI Symbol;Acc:MGI:99436]	Arl1	138.4	140.8	139.8	148.4	149.6	147		139.667	148.333		0.104093	0.122971	1.31885		P61211	ADP-ribosylation factor-like protein 1	ARL1_MOUSE	Arl1	138905	110362	86502	66442	78106	80806		111923	75118		-0.553647	0.0284641	0.0262607
	ENSMUSG00000027122	ADP-ribosylation factor-like 14 effector protein [Source:MGI Symbol;Acc:MGI:1926020]	Arl14ep	29.8	26.7	27	24.5	26.1	25		27.8333	25.2		-0.0931887	0.195617	0.929102		Q8BIX3	ARL14 effector protein	AL14E_MOUSE	Arl14ep	3269	3506	3544	2471	2980	2722		3439.67	2724.33		-0.33966	0.0279451	0.0130196
	ENSMUSG00000024944	ADP-ribosylation factor-like 2 [Source:MGI Symbol;Acc:MGI:1928393]	Arl2	7.8	7.8	8.8	10.6	8.5	7.9		8.13333	9		0.0185369	0.523105	0.0715974		Q9D0J4	ADP-ribosylation factor-like protein 2	ARL2_MOUSE	Arl2	56165	50726	48148	42760	41985	27604		51679.7	37449.7		-0.48962	0.0317692	0.0414515
	ENSMUSG00000031776	ADP-ribosylation factor-like 2 binding protein [Source:MGI Symbol;Acc:MGI:1349429]	Arl2bp	134	135.8	140	162.5	141.6	143.5		136.6	149.2		0.0853536	0.124027	1.31118		Q9D385;Q9D385-2	ADP-ribosylation factor-like protein 2-binding protein;Isoform 2 of ADP-ribosylation factor-like protein 2-binding protein	AR2BP_MOUSE	Arl2bp	4599	4629	4780	3944	5256	4429		4669.33	4543		-0.0494752	0.200367	0.694298
	ENSMUSG00000025035	ADP-ribosylation factor-like 3 [Source:MGI Symbol;Acc:MGI:1929699]	Arl3	17	17	18.8	17.6	20.2	16.9		17.6	18.2333		0.0497152	0.421956	0.275554		Q9WUL7	ADP-ribosylation factor-like protein 3	ARL3_MOUSE	Arl3	42591	36379	36757	28335	33635	30420		38575.7	30796.7		-0.324702	0.0282128	0.0234567
	ENSMUSG00000049866	ADP-ribosylation factor-like 4C [Source:MGI Symbol;Acc:MGI:2445172]	Arl4c	194.5	191.7	210.6	228.2	199.3	212.1		198.933	213.2		0.0535616	0.307266	0.550976		P61208	ADP-ribosylation factor-like protein 4C	ARL4C_MOUSE	Arl4c	6987	3808	4882	2610	3769	3597		5225.67	3325.33		-0.625384	0.034575	0.0513729
	ENSMUSG00000036093	ADP-ribosylation factor-like 5A [Source:MGI Symbol;Acc:MGI:1922673]	Arl5a	89.4	84	88.9	108.1	93.4	93.9		87.4333	98.4667		0.130052	0.0786694	1.69863		Q80ZU0	ADP-ribosylation factor-like protein 5A	ARL5A_MOUSE	Arl5a	5255	4493	4173	3166	3917	3573		4640.33	3552		-0.384303	0.0282128	0.0235666
	ENSMUSG00000022722	ADP-ribosylation factor-like 6 [Source:MGI Symbol;Acc:MGI:1927136]	Arl6	9.2	7.8	8.2	7.3	8.5	7.1		8.4	7.63333		-0.0755553	0.419361	0.281067		O88848;O88848-2	ADP-ribosylation factor-like protein 6;Isoform 2 of ADP-ribosylation factor-like protein 6	ARL6_MOUSE	Arl6	1858	1576	1289	824	1334	1328		1574.33	1162		-0.456847	0.0503706	0.10106
	ENSMUSG00000030654	ADP-ribosylation factor-like 6 interacting protein 1 [Source:MGI Symbol;Acc:MGI:1858943]	Arl6ip1	514.9	512.1	546.4	675.1	561.6	574.9		524.467	603.867		0.138601	0.0619202	1.89211		Q9JKW0	ADP-ribosylation factor-like protein 6-interacting protein 1	AR6P1_MOUSE	Arl6ip1	6908	7393	6881	6292	5768	6019		7060.67	6026.33		-0.228644	0.0285336	0.0267032
	ENSMUSG00000029404	ADP-ribosylation factor-like 6 interacting protein 4 [Source:MGI Symbol;Acc:MGI:1929500]	Arl6ip4	138.4	142.8	143.4	148.2	139.6	133.5		141.533	140.433		-0.0283584	0.443695	0.227665		Q9JM93	ADP-ribosylation factor-like protein 6-interacting protein 4	AR6P4_MOUSE	Arl6ip4	5685	6491	6089	5135	5811	5735		6088.33	5560.33		-0.130954	0.0817452	0.209522
	ENSMUSG00000035199	ADP-ribosylation factor-like 6 interacting protein 5 [Source:MGI Symbol;Acc:MGI:1929501]	Arl6ip5	338	361.6	354.2	338.4	358.5	358.7		351.267	351.867		0.034472	0.396853	0.330376		Q8R5J9	PRA1 family protein 3	PRAF3_MOUSE	Arl6ip5	213381	211872	202364	151594	177491	178267		209206	169117		-0.310526	0.0279451	0.0164217
	ENSMUSG00000026960	ADP-ribosylation factor-like 6 interacting protein 6 [Source:MGI Symbol;Acc:MGI:1929507]	Arl6ip6	34.5	33.7	35.4	38.9	34.2	34.2		34.5333	35.7667		0.00809956	0.533767	0.0510003		Q8BH07	ADP-ribosylation factor-like protein 6-interacting protein 6	AR6P6_MOUSE	Arl6ip6	1117	903	922	1142	1040	1020		980.667	1067.33		0.12715	0.105427	0.300132
	ENSMUSG00000026426	ADP-ribosylation factor-like 8A [Source:MGI Symbol;Acc:MGI:1915974]	Arl8a	68.8	69.6	65	61.8	68.6	60.2		67.8	63.5333		-0.0391662	0.417366	0.28662		Q8VEH3	ADP-ribosylation factor-like protein 8A	ARL8A_MOUSE	Arl8a	132716	105398	97547	70220	85476	81968		111887	79221.3		-0.49056	0.0279451	0.0154027
	ENSMUSG00000030105	ADP-ribosylation factor-like 8B [Source:MGI Symbol;Acc:MGI:1914416]	Arl8b	97.7	96.3	99.2	97.3	102.4	99.9		97.7333	99.8667		0.0556606	0.247371	0.731063		Q9CQW2	ADP-ribosylation factor-like protein 8B	ARL8B_MOUSE	Arl8b	53207	56753	42657	32852	41159	45824		50872.3	39945		-0.351934	0.044041	0.0815019
	ENSMUSG00000027599	armadillo repeat containing 1 [Source:MGI Symbol;Acc:MGI:1921502]	Armc1	64.7	65.2	66.7	71.3	68.1	68.7		65.5333	69.3667		0.076195	0.210532	0.857845		Q9D7A8	Armadillo repeat-containing protein 1	ARMC1_MOUSE	Armc1	12936	12721	14872	12010	13466	12720		13509.7	12732		-0.0835154	0.136896	0.422857
	ENSMUSG00000038525	armadillo repeat containing 10 [Source:MGI Symbol;Acc:MGI:1914461]	Armc10	55	58	57.6	67.2	63	60.7		56.8667	63.6333		0.143299	0.0380777	2.29633		Q9D0L7	Armadillo repeat-containing protein 10	ARM10_MOUSE	Armc10	26220	24890	25384	21895	25691	23260		25498	23615.3		-0.113479	0.0917247	0.247409
	ENSMUSG00000002343	armadillo repeat containing 6 [Source:MGI Symbol;Acc:MGI:1924063]	Armc6	21.9	20.5	23.1	24.1	22.2	21.1		21.8333	22.4667		-0.00898477	0.53875	0.0412768		Q8BNU0	Armadillo repeat-containing protein 6	ARMC6_MOUSE	Armc6	24255	25702	22838	15966	19617	18516		24265	18033		-0.431906	0.0279451	0.00674649
	ENSMUSG00000032468	armadillo repeat containing 8 [Source:MGI Symbol;Acc:MGI:1921375]	Armc8	30.5	29	30.5	34.1	27.6	31		30	30.9		-0.00850725	0.531397	0.0566626		Q9DBR3	Armadillo repeat-containing protein 8	ARMC8_MOUSE	Armc8	26632	28404	23611	19327	23188	22916		26215.7	21810.3		-0.266121	0.0379051	0.0613434
	ENSMUSG00000039901	armadillo-like helical domain containing 3 [Source:MGI Symbol;Acc:MGI:1918867]	Armh3	13.8	14.8	14.4	14.4	14.4	14		14.3333	14.2667		0.00357173	0.549386	0.0208584		Q6PD19	Armadillo-like helical domain-containing protein 3	ARMD3_MOUSE	Armh3	1038	965	673	634	715	780		892	709.667		-0.310323	0.0637395	0.146011
	ENSMUSG00000061759	acidic residue methyltransferase 1 [Source:MGI Symbol;Acc:MGI:1920669]	Armt1	13.1	10.5	11.7	13.7	11.2	11.8		11.7667	12.2333		0.0176318	0.507272	0.100697		A6H630	Damage-control phosphatase ARMT1	ARMT1_MOUSE	Armt1	10328	11055	9288	6811	8138	7694		10223.7	7547.67		-0.43807	0.0279451	0.00706249
	ENSMUSG00000015522	aryl hydrocarbon receptor nuclear translocator [Source:MGI Symbol;Acc:MGI:88071]	Arnt	21.9	21	22.5	23	21.9	21.5		21.8	22.1333		0.0048167	0.540284	0.0382594		P53762;P53762-2	Aryl hydrocarbon receptor nuclear translocator;Isoform Short of Aryl hydrocarbon receptor nuclear translocator	ARNT_MOUSE	Arnt	1291	877	831	669	884	824		999.667	792.333		-0.316382	0.0704555	0.169588
	ENSMUSG00000029621	actin related protein 2/3 complex, subunit 1A [Source:MGI Symbol;Acc:MGI:1928896]	Arpc1a	120.9	124.6	122.1	129.3	121.4	121.7		122.533	124.133		0.0155985	0.488066	0.141277		Q9R0Q6	Actin-related protein 2/3 complex subunit 1A	ARC1A_MOUSE	Arpc1a	21740	17564	18152	16927	17052	16446		19152	16808.3		-0.182033	0.0588708	0.13034
	ENSMUSG00000029622	actin related protein 2/3 complex, subunit 1B [Source:MGI Symbol;Acc:MGI:1343142]	Arpc1b	402.4	447.7	441.4	404.2	434.5	416.8		430.5	418.5		-0.016986	0.499936	0.118312		Q9WV32	Actin-related protein 2/3 complex subunit 1B	ARC1B_MOUSE	Arpc1b	850684	837719	735464	553874	661400	659839		807956	625038		-0.372183	0.0279451	0.0153073
	ENSMUSG00000006304	actin related protein 2/3 complex, subunit 2 [Source:MGI Symbol;Acc:MGI:1923959]	Arpc2	1249.8	1312.6	1283.6	1267.4	1296.9	1289.9		1282	1284.73		0.0258254	0.433101	0.249816		Q9CVB6	Actin-related protein 2/3 complex subunit 2	ARPC2_MOUSE	Arpc2	1121967	1062811	1072433	835050	944380	908374		1085737	895935		-0.27869	0.0279451	0.0145836
	ENSMUSG00000029465	actin related protein 2/3 complex, subunit 3 [Source:MGI Symbol;Acc:MGI:1928375]	Arpc3	366.9	390.3	377.8	338.7	373.5	375.2		378.333	362.467		-0.0125752	0.516081	0.0852081		Q9JM76	Actin-related protein 2/3 complex subunit 3	ARPC3_MOUSE	Arpc3	792004	832682	700032	567024	622034	675683		774906	621580		-0.317981	0.02851	0.026348
	ENSMUSG00000079426	actin related protein 2/3 complex, subunit 4 [Source:MGI Symbol;Acc:MGI:1915339]	Arpc4	374.5	407.9	400.1	379.9	398.2	402.9		394.167	393.667		0.0253959	0.469816	0.175097		P59999	Actin-related protein 2/3 complex subunit 4	ARPC4_MOUSE	Arpc4	1392196	1247091	1345996	1033309	1171899	1176970		1.32843e+06	1.12739e+06		-0.237802	0.0318897	0.0420037
	ENSMUSG00000008475	actin related protein 2/3 complex, subunit 5 [Source:MGI Symbol;Acc:MGI:1915021]	Arpc5	542.3	569.4	572.2	563	587.9	563.8		561.3	571.567		0.042965	0.37311	0.382393		Q9CPW4	Actin-related protein 2/3 complex subunit 5	ARPC5_MOUSE	Arpc5	771194	765069	787688	610319	698151	711725		774650	673398		-0.205295	0.0374871	0.0598823
	ENSMUSG00000026755	actin related protein 2/3 complex, subunit 5-like [Source:MGI Symbol;Acc:MGI:1921442]	Arpc5l	72.1	69.7	70.1	62.6	65.4	64.7		70.6333	64.2333		-0.102521	0.0929391	1.56414		Q9D898	Actin-related protein 2/3 complex subunit 5-like protein	ARP5L_MOUSE	Arpc5l	182598	157074	154437	123452	137614	140751		164703	133939		-0.29647	0.0288244	0.0287984
	ENSMUSG00000007656	cAMP-regulated phosphoprotein 19 [Source:MGI Symbol;Acc:MGI:1891691]	Arpp19	72.4	74.3	74.2	73.4	74.1	75.6		73.6333	74.3667		0.0342948	0.409875	0.303071		P56212	cAMP-regulated phosphoprotein 19	ARP19_MOUSE	Arpp19	407157	380306	391442	308529	345491	342440		392968	332153		-0.24388	0.0284641	0.0260166
	ENSMUSG00000018909	arrestin, beta 1 [Source:MGI Symbol;Acc:MGI:99473]	Arrb1	10.5	12.2	10.9	9.3	13.2	11.6		11.2	11.3667		0.14012	0.175016	1.02371		Q8BWG8-2	Isoform 1B of Beta-arrestin-1	ARRB1_MOUSE	Arrb1	19295	19387	15629	9371	12972	14352		18103.7	12231.7		-0.581538	0.0279451	0.0204571
	ENSMUSG00000060216	arrestin, beta 2 [Source:MGI Symbol;Acc:MGI:99474]	Arrb2	271.4	257.8	269.6	270.1	259	252.3		266.267	260.467		-0.0378115	0.334937	0.478273		Q91YI4;Q91YI4-2	Beta-arrestin-2;Isoform 2 of Beta-arrestin-2	ARRB2_MOUSE	Arrb2	114699	92949	96070	73859	84437	81641		101239	79979		-0.336121	0.0283715	0.0245783
	ENSMUSG00000026972	arrestin domain containing 1 [Source:MGI Symbol;Acc:MGI:2446136]	Arrdc1	55.7	49.8	50.9	60.4	53	49.3		52.1333	54.2333		0.0282906	0.466844	0.180599		Q99KN1	Arrestin domain-containing protein 1	ARRD1_MOUSE	Arrdc1	5125	6116	4558	3424	4220	4547		5266.33	4063.67		-0.373567	0.0358929	0.0551396
	ENSMUSG00000042082	arylsulfatase B [Source:MGI Symbol;Acc:MGI:88075]	Arsb	80.3	75.6	80.2	88.5	82	78.7		78.7	83.0667		0.054525	0.406687	0.308844		P50429	Arylsulfatase B	ARSB_MOUSE	Arsb	19927	17309	19531	14091	15722	15745		18922.3	15186		-0.31652	0.0279451	0.0160151
	ENSMUSG00000031591	N-acylsphingosine amidohydrolase 1 [Source:MGI Symbol;Acc:MGI:1277124]	Asah1	75	79.9	71.3	63	74.7	70.1		75.4	69.2667		-0.0325852	0.460353	0.193852		Q9WV54	Acid ceramidase	ASAH1_MOUSE	Asah1	24749	22775	19993	12611	17316	16610		22505.7	15512.3		-0.545159	0.0279451	0.0122127
	ENSMUSG00000022377	ArfGAP with SH3 domain, ankyrin repeat and PH domain1 [Source:MGI Symbol;Acc:MGI:1342335]	Asap1	8.7	9	9.8	14.5	10.7	10.3		9.16667	11.8333		0.227714	0.0948861	1.54508		Q9QWY8;Q9QWY8-2;Q9QWY8-3;Q9QWY8-4	Arf-GAP with SH3 domain, ANK repeat and PH domain-containing protein 1;Isoform 2 of Arf-GAP with SH3 domain, ANK repeat and PH domain-containing protein 1;Isoform 3 of Arf-GAP with SH3 domain, ANK repeat and PH domain-containing protein 1;Isoform 4 of Arf-GAP with SH3 domain, ANK repeat and PH domain-containing protein 1	ASAP1_MOUSE	Asap1	492	387	310	550	513	437		396.333	500		0.354255	0.0529674	0.110188
	ENSMUSG00000021200	ankyrin repeat and SOCS box-containing 2 [Source:MGI Symbol;Acc:MGI:1929743]	Asb2	41.8	57.2	56.9	46.6	63.4	59		51.9667	56.3333		0.176903	0.247948	0.729473		Q8K0L0;Q8K0L0-2	Ankyrin repeat and SOCS box protein 2;Isoform 2 of Ankyrin repeat and SOCS box protein 2	ASB2_MOUSE	Asb2	1031	901	812	546	740	784		914.667	690		-0.417233	0.0338792	0.0490216
	ENSMUSG00000020305	ankyrin repeat and SOCS box-containing 3 [Source:MGI Symbol;Acc:MGI:1929749]	Asb3	9.9	8.5	10.7	11.6	9.9	11.3		9.7	10.9333		0.108974	0.279144	0.631988		Q9WV72	Ankyrin repeat and SOCS box protein 3	ASB3_MOUSE	Asb3	3386	2753	2066	1253	1840	1710		2735	1601		-0.762779	0.0279451	0.0158359
	ENSMUSG00000039483	ankyrin repeat and SOCS box-containing 6 [Source:MGI Symbol;Acc:MGI:1919573]	Asb6	28.8	32.7	30.2	31.5	31.3	30.8		30.5667	31.2		0.0492242	0.372593	0.383575		Q91ZU1	Ankyrin repeat and SOCS box protein 6	ASB6_MOUSE	Asb6	9264	7700	6889	4607	5634	5516		7951	5252.33		-0.59306	0.0279451	0.00615363
	ENSMUSG00000044475	activating signal cointegrator 1 complex subunit 1 [Source:MGI Symbol;Acc:MGI:1916340]	Ascc1	26.1	26.7	28.1	33.7	28.7	30.2		26.9667	30.8667		0.139369	0.139355	1.21402		Q9D8Z1	Activating signal cointegrator 1 complex subunit 1	ASCC1_MOUSE	Ascc1	6080	5687	5235	3925	4792	4738		5667.33	4485		-0.340777	0.0283396	0.0242271
	ENSMUSG00000020412	activating signal cointegrator 1 complex subunit 2 [Source:MGI Symbol;Acc:MGI:1922702]	Ascc2	51.5	50.3	54	58.6	50.4	48.3		51.9333	52.4333		-0.0498705	0.311719	0.538288		Q91WR3;Q91WR3-3	Activating signal cointegrator 1 complex subunit 2;Isoform 3 of Activating signal cointegrator 1 complex subunit 2	ASCC2_MOUSE	Ascc2	7382	6560	7497	5055	6030	5226		7146.33	5437		-0.396148	0.0279451	0.0093574
	ENSMUSG00000038774	activating signal cointegrator 1 complex subunit 3 [Source:MGI Symbol;Acc:MGI:1925237]	Ascc3	17.7	17.6	16.3	14.3	16.2	15.4		17.2	15.3		-0.091377	0.186855	0.967899		E9PZJ8	Activating signal cointegrator 1 complex subunit 3	ASCC3_MOUSE	Ascc3	7072	6408	5453	3516	4459	4566		6311	4180.33		-0.595819	0.0279451	0.00716774
	ENSMUSG00000019857	anti-silencing function 1A histone chaperone [Source:MGI Symbol;Acc:MGI:1913653]	Asf1a	21.9	22.1	21.6	27.3	26.6	24		21.8667	25.9667		0.248481	0.010497	3.31658		Q9CQE6	Histone chaperone ASF1A	ASF1A_MOUSE	Asf1a	11638	16378	16206	16190	14460	11036		14740.7	13895.3		-0.0859142	0.197712	0.682608
	ENSMUSG00000005470	anti-silencing function 1B histone chaperone [Source:MGI Symbol;Acc:MGI:1914179]	Asf1b	120.4	114.3	126.9	165.8	138.4	134.2		120.533	146.133		0.200784	0.0183738	2.85015		Q9DAP7	Histone chaperone ASF1B	ASF1B_MOUSE	Asf1b	59241	62709	60810	65124	61988	65774		60920	64295.3		0.0777062	0.112558	0.328568
	ENSMUSG00000031575	ASH2 like histone lysine methyltransferase complex subunit [Source:MGI Symbol;Acc:MGI:1344416]	Ash2l	34.8	33.8	36	40.2	37.5	35.1		34.8667	37.6		0.0770128	0.180407	0.997513		Q91X20	Set1/Ash2 histone methyltransferase complex subunit ASH2	ASH2L_MOUSE	Ash2l	22490	21637	21342	21448	21632	18955		21823	20678.3		-0.0799636	0.128338	0.387775
	ENSMUSG00000025533	argininosuccinate lyase [Source:MGI Symbol;Acc:MGI:88084]	Asl	20.2	22.6	22.1	18	19.9	18.5		21.6333	18.8		-0.171923	0.0876666	1.60738		Q91YI0	Argininosuccinate lyase	ARLY_MOUSE	Asl	40422	82724	43881	30008	37119	35940		55675.7	34355.7		-0.624649	0.0412923	0.0719375
	ENSMUSG00000029752	asparagine synthetase [Source:MGI Symbol;Acc:MGI:1350929]	Asns	240.4	244.5	227.1	122.8	209.2	193.3		237.333	175.1		-0.268883	0.0862401	1.62158		Q61024	Asparagine synthetase [glutamine-hydrolyzing]	ASNS_MOUSE	Asns	181924	175495	170415	68765	121758	124812		175945	105112		-0.793433	0.0279451	0.0164789
	ENSMUSG00000033952	abnormal spindle microtubule assembly [Source:MGI Symbol;Acc:MGI:1334448]	Aspm	31.2	29.7	33.3	48.2	35.5	35.4		31.4	39.7		0.208808	0.0302699	2.47649		Q8CJ27;Q8CJ27-2	Abnormal spindle-like microcephaly-associated protein homolog;Isoform 2 of Abnormal spindle-like microcephaly-associated protein homolog	ASPM_MOUSE	Aspm	145	128	176	100	96	90		149.667	95.3333		-0.639556	0.0279451	0.00303119
	ENSMUSG00000025142	alveolar soft part sarcoma chromosome region, candidate 1 (human) [Source:MGI Symbol;Acc:MGI:1916188]	Aspscr1	30	31.7	32.1	34.1	30.9	30.6		31.2667	31.8667		-0.00625143	0.538016	0.0424509		Q8VBT9	Tether containing UBX domain for GLUT4	ASPC1_MOUSE	Aspscr1	24869	27042	28531	21497	28574	24516		26814	24862.3		-0.116506	0.130031	0.394529
	ENSMUSG00000024654	asparaginase like 1 [Source:MGI Symbol;Acc:MGI:1913764]	Asrgl1	24.7	23.6	26.5	34	29.4	29.5		24.9333	30.9667		0.246978	0.00988131	3.36638		Q8C0M9	Isoaspartyl peptidase/L-asparaginase	ASGL1_MOUSE	Asrgl1	24301	26995	24617	21946	25545	25042		25304.3	24177.7		-0.067338	0.157648	0.508626
	ENSMUSG00000076441	argininosuccinate synthetase 1 [Source:MGI Symbol;Acc:MGI:88090]	Ass1	80.2	86.5	84	77.6	77.3	79.4		83.5667	78.1		-0.0809663	0.34319	0.457886		P16460	Argininosuccinate synthase	ASSY_MOUSE	Ass1	147838	152244	156095	117759	132382	131620		152059	127254		-0.258635	0.0279451	0.0205963
	ENSMUSG00000037486	ASXL transcriptional regulator 2 [Source:MGI Symbol;Acc:MGI:1922552]	Asxl2	13.8	12.8	13.7	15.7	14.1	12.4		13.4333	14.0667		0.014862	0.500111	0.116716		Q8BZ32	Putative Polycomb group protein ASXL2	ASXL2_MOUSE	Asxl2	1469	1603	801	575	991	1305		1291	957		-0.447614	0.103766	0.294095
	ENSMUSG00000013662	ATPase family, AAA domain containing 1 [Source:MGI Symbol;Acc:MGI:1915229]	Atad1	75.7	71.3	74.5	76.5	74	77.7		73.8333	76.0667		0.0527353	0.27238	0.650259		Q9D5T0	ATPase family AAA domain-containing protein 1	ATAD1_MOUSE	Atad1	60626	55441	52342	43067	47784	43469		56136.3	44773.3		-0.325254	0.0279451	0.0127022
	ENSMUSG00000022360	ATPase family, AAA domain containing 2 [Source:MGI Symbol;Acc:MGI:1917722]	Atad2	40	35	40.7	49.9	39.5	40.4		38.5667	43.2667		0.0788378	0.255377	0.704295		Q8CDM1	ATPase family AAA domain-containing protein 2	ATAD2_MOUSE	Atad2	12821	11558	10839	10858	11239	10557		11739.3	10884.7		-0.106053	0.102384	0.288271
	ENSMUSG00000052812	ATPase family, AAA domain containing 2B [Source:MGI Symbol;Acc:MGI:2444798]	Atad2b	14.9	13.3	15.3	17.3	15.1	15.2		14.5	15.8667		0.0703664	0.257592	0.695839		E9Q166	ATPase family, AAA domain-containing 2B	E9Q166_MOUSE	Atad2b	7766	5985	6415	6567	6749	6300		6722	6538.67		-0.0315707	0.222288	0.794971
	ENSMUSG00000029036	ATPase family, AAA domain containing 3A [Source:MGI Symbol;Acc:MGI:1919214]	Atad3a	82.4	80.3	85.9	87.5	77.1	76.9		82.8667	80.5		-0.0869311	0.189808	0.954485		Q925I1	ATPase family AAA domain-containing protein 3	ATAD3_MOUSE	Atad3	42050	41073	42229	37234	38575	38753		41784	38187.3		-0.129978	0.0530375	0.110496
	ENSMUSG00000017550	ATPase family, AAA domain containing 5 [Source:MGI Symbol;Acc:MGI:2442925]	Atad5	46.7	45.7	48.1	53.5	45.7	46.2		46.8333	48.4667		0.00033588	0.559536	0.00263519		Q4QY64	ATPase family AAA domain-containing protein 5	ATAD5_MOUSE	Atad5	3718	3825	4080	3589	3773	3617		3874.33	3659.67		-0.0814894	0.112637	0.329006
	ENSMUSG00000030850	arginyltransferase 1 [Source:MGI Symbol;Acc:MGI:1333870]	Ate1	25.1	26.8	25.7	25.5	25.3	26.7		25.8667	25.8333		0.0233846	0.471376	0.172124		Q9Z2A5-2	Isoform ATE1-2 of Arginyl-tRNA--protein transferase 1	ATE1_MOUSE	Ate1	13822	15995	15608	10894	14025	13667		15141.7	12862		-0.241547	0.0522114	0.10753
	ENSMUSG00000027104	activating transcription factor 2 [Source:MGI Symbol;Acc:MGI:109349]	Atf2	22	20.6	21.7	25.2	22.9	22.6		21.4333	23.5667		0.113749	0.124132	1.31004		P16951	Cyclic AMP-dependent transcription factor ATF-2	ATF2_MOUSE	Atf2	1621	1723	2107	1779	1807	1540		1817	1708.67		-0.0831346	0.166197	0.545508
	ENSMUSG00000099083	activating transcription factor 7 [Source:MGI Symbol;Acc:MGI:2443472]	Atf7	18.9	16.8	18	20	16.8	17		17.9	17.9333		-0.0412927	0.384312	0.357874		Q8R0S1	Cyclic AMP-dependent transcription factor ATF-7	ATF7_MOUSE	Atf7	1589	1892	1579	1354	1541	1360		1686.67	1418.33		-0.247447	0.0387914	0.0638605
	ENSMUSG00000030213	activating transcription factor 7 interacting protein [Source:MGI Symbol;Acc:MGI:1858965]	Atf7ip	15.1	13.7	15.2	15.5	13.4	12.9		14.6667	13.9333		-0.127816	0.10232	1.47524		Q7TT18	Activating transcription factor 7-interacting protein 1	MCAF1_MOUSE	Atf7ip	3345	3295	3161	2484	3014	2911		3267	2803		-0.225602	0.0385682	0.063305
	ENSMUSG00000037204	autophagy related 101 [Source:MGI Symbol;Acc:MGI:1915368]	Atg101	29.7	33.1	29.9	34.3	34.7	30.7		30.9	33.2333		0.125969	0.217274	0.833774		Q9D8Z6	Autophagy-related protein 101	ATGA1_MOUSE	Atg101	204	368	367	329	343	0		313	224		0.153463	0.18482	0.626155
	ENSMUSG00000032905	autophagy related 12 [Source:MGI Symbol;Acc:MGI:1914776]	Atg12	13.5	13.6	13.6	14.1	15.2	13.4		13.5667	14.2333		0.0886533	0.198204	0.91623		Q9CQY1	Ubiquitin-like protein ATG12	ATG12_MOUSE	Atg12	3808	4203	6301	5165	3721	2654		4770.67	3846.67		-0.327802	0.108988	0.314131
	ENSMUSG00000027244	autophagy related 13 [Source:MGI Symbol;Acc:MGI:1196429]	Atg13	21.1	21.7	22.4	29.3	22.9	22.8		21.7333	25		0.109875	0.211881	0.85284		Q91YI1;Q91YI1-2	Autophagy-related protein 13;Isoform 2 of Autophagy-related protein 13	ATG13_MOUSE	Atg13	953	759	383	434	418	449		698.333	433.667		-0.588669	0.0575151	0.125841
	ENSMUSG00000026289	autophagy related 16-like 1 (S. cerevisiae) [Source:MGI Symbol;Acc:MGI:1924290]	Atg16l1	15.4	15.3	15.4	15.3	15.1	12.8		15.3667	14.4		-0.112986	0.139327	1.21424		Q8C0J2;Q8C0J2-2;Q8C0J2-3;Q8C0J2-4;Q8C0J2-5	Autophagy-related protein 16-1;Isoform 2 of Autophagy-related protein 16-1;Isoform 3 of Autophagy-related protein 16-1;Isoform 4 of Autophagy-related protein 16-1;Isoform 5 of Autophagy-related protein 16-1	A16L1_MOUSE	Atg16l1	310	539	596	437	524	361		481.667	440.667		-0.0895556	0.214553	0.759553
	ENSMUSG00000047767	autophagy related 16-like 2 (S. cerevisiae) [Source:MGI Symbol;Acc:MGI:1920933]	Atg16l2	7.2	5.2	5.8	6.5	5.2	5.6		6.06667	5.76667		-0.0941233	0.353204	0.431791		Q6KAU8;Q6KAU8-2	Autophagy-related protein 16-2;Isoform 2 of Autophagy-related protein 16-2	A16L2_MOUSE	Atg16l2	621	438	339	252	248	324		466	274.667		-0.729017	0.0281378	0.0231191
	ENSMUSG00000024773	autophagy related 2A [Source:MGI Symbol;Acc:MGI:1916291]	Atg2a	13.1	12	12.9	15	12.6	11.4		12.6667	13		-0.0361793	0.467333	0.179234		Q6P4T0	Autophagy-related protein 2 homolog A	ATG2A_MOUSE	Atg2a	534	300	245	205	215	224		359.667	214.667		-0.663708	0.0371149	0.0589362
	ENSMUSG00000041341	autophagy related 2B [Source:MGI Symbol;Acc:MGI:1923809]	Atg2b	11.8	10.6	11.5	10.9	10.4	9.7		11.3	10.3333		-0.148462	0.0816085	1.66645		Q80XK6	Autophagy-related protein 2 homolog B	ATG2B_MOUSE	Atg2b	5148	6258	6087	3607	4752	4374		5831	4244.33		-0.462386	0.0279451	0.0153511
	ENSMUSG00000022663	autophagy related 3 [Source:MGI Symbol;Acc:MGI:1915091]	Atg3	80.3	85.4	84.1	82.1	79.4	84.2		83.2667	81.9		-0.0141307	0.50669	0.102349		Q9CPX6	Ubiquitin-like-conjugating enzyme ATG3	ATG3_MOUSE	Atg3	58887	55408	47369	41299	41608	45648		53888	42851.7		-0.326156	0.0283184	0.0239971
	ENSMUSG00000079418	autophagy related 4A, cysteine peptidase [Source:MGI Symbol;Acc:MGI:2147903]	Atg4a	24.3	24.5	25.5	22.8	25	24.7		24.7667	24.1667		-0.00688777	0.541662	0.0358486		Q8C9S8	Cysteine protease ATG4A	ATG4A_MOUSE	Atg4a	835	1156	930	659	811	822		973.667	764		-0.343653	0.0406817	0.0701051
	ENSMUSG00000026280	autophagy related 4B, cysteine peptidase [Source:MGI Symbol;Acc:MGI:1913865]	Atg4b	19.6	18.7	19.1	19	19.6	18		19.1333	18.8667		-0.00278709	0.548599	0.0219541		Q8BGE6	Cysteine protease ATG4B	ATG4B_MOUSE	Atg4b	13798	12484	12030	9225	10901	9324		12770.7	9816.67		-0.381358	0.0279451	0.0107014
	ENSMUSG00000038160	autophagy related 5 [Source:MGI Symbol;Acc:MGI:1277186]	Atg5	75.4	83.8	79.7	82.6	80.2	83		79.6333	81.9333		0.0531425	0.365885	0.400462		Q99J83	Autophagy protein 5	ATG5_MOUSE	Atg5	17540	15701	15505	12915	14656	15934		16248.7	14501.7		-0.167197	0.0719755	0.175218
	ENSMUSG00000030314	autophagy related 7 [Source:MGI Symbol;Acc:MGI:1921494]	Atg7	11.2	11.8	12.1	10.5	11.3	11.1		11.7	10.9667		-0.075651	0.296397	0.581373		Q9D906	Ubiquitin-like modifier-activating enzyme ATG7	ATG7_MOUSE	Atg7	15898	15287	14853	11319	13414	11938		15346	12223.7		-0.331286	0.0279451	0.0116323
	ENSMUSG00000026192	5-aminoimidazole-4-carboxamide ribonucleotide formyltransferase/IMP cyclohydrolase [Source:MGI Symbol;Acc:MGI:1351352]	Atic	90.2	90	93.7	107.5	98.4	97.3		91.3	101.067		0.118791	0.0477712	2.10184		Q9CWJ9	Bifunctional purine biosynthesis protein ATIC	PUR9_MOUSE	Atic	612358	624682	685440	616928	644565	616156		640827	625883		-0.0326013	0.201506	0.69957
	ENSMUSG00000059811	atlastin GTPase 2 [Source:MGI Symbol;Acc:MGI:1929492]	Atl2	23.4	22.1	23.3	25.3	24.4	23		22.9333	24.2333		0.0694267	0.177072	1.01476		Q6PA06	Atlastin-2	ATLA2_MOUSE	Atl2	6245	6726	7249	5759	6396	6196		6740	6117		-0.138636	0.0740052	0.181659
	ENSMUSG00000024759	atlastin GTPase 3 [Source:MGI Symbol;Acc:MGI:1924270]	Atl3	57.5	54.3	59	66.3	59.7	59.1		56.9333	61.7		0.0785981	0.190207	0.952194		Q91YH5	Atlastin-3	ATLA3_MOUSE	Atl3	44175	43059	40516	36154	37943	36924		42583.3	37007		-0.20183	0.0304149	0.0367741
	ENSMUSG00000034218	ataxia telangiectasia mutated [Source:MGI Symbol;Acc:MGI:107202]	Atm	22.4	20.4	23.7	24.4	22.8	22		22.1667	23.0667		0.0148488	0.512688	0.0911249		Q62388	Serine-protein kinase ATM	ATM_MOUSE	Atm	2816	2498	2299	1944	1977	2102		2537.67	2007.67		-0.333775	0.0279451	0.0160837
	ENSMUSG00000004263	atrophin 1 [Source:MGI Symbol;Acc:MGI:104725]	Atn1	1.9	2	1.8	2.3	2.4	1.7		1.9	2.13333		0.134035	0.381425	0.364078		O35126	Atrophin-1	ATN1_MOUSE	Atn1	82	87	73	77	82	91		80.6667	83.3333		0.047271	0.196069	0.674789
	ENSMUSG00000018585	antioxidant 1 copper chaperone [Source:MGI Symbol;Acc:MGI:1333855]	Atox1	178.8	180.8	179.4	178.7	177.6	172.6		179.667	176.3		-0.0151765	0.513593	0.0892086		O08997	Copper transport protein ATOX1	ATOX1_MOUSE	Atox1	222127	195331	212390	148515	182807	139826		209949	157049		-0.426486	0.0279451	0.0144083
	ENSMUSG00000025324	ATPase, class V, type 10A [Source:MGI Symbol;Acc:MGI:1330809]	Atp10a	115.8	115.5	119.7	126	111.9	119		117	118.967		-0.00274825	0.550279	0.0195082		O54827	Probable phospholipid-transporting ATPase VA	AT10A_MOUSE	Atp10a	1553	1319	778	838	810	970		1216.67	872.667		-0.425091	0.0671283	0.157756
	ENSMUSG00000037400	ATPase, class VI, type 11B [Source:MGI Symbol;Acc:MGI:1923545]	Atp11b	134.6	124.3	131.4	143.6	134.6	131.3		130.1	136.5		0.056882	0.298364	0.576406		Q6DFW5	Phospholipid-transporting ATPase	Q6DFW5_MOUSE	Atp11b	12516	10981	11537	8752	10317	8669		11678	9246		-0.339468	0.0279451	0.0177309
	ENSMUSG00000062949	ATPase, class VI, type 11C [Source:MGI Symbol;Acc:MGI:1859661]	Atp11c	25.6	23.4	24.9	28.7	25.5	25.4		24.6333	26.5333		0.0770108	0.199287	0.909985		Q9QZW0-2	Isoform 2 of Phospholipid-transporting ATPase 11C	AT11C_MOUSE	Atp11c	3243	3919	3556	3027	3401	3202		3572.67	3210		-0.15175	0.0747584	0.184367
	ENSMUSG00000031862	ATPase type 13A1 [Source:MGI Symbol;Acc:MGI:2180801]	Atp13a1	78.6	75.4	76.9	74.2	67.9	62.9		76.9667	68.3333		-0.198134	0.00941061	3.40979		Q9EPE9	Manganese-transporting ATPase 13A1	AT131_MOUSE	Atp13a1	25351	23009	24515	17627	21528	20120		24291.7	19758.3		-0.301758	0.0284127	0.0255084
	ENSMUSG00000022533	ATPase type 13A3 [Source:MGI Symbol;Acc:MGI:2685387]	Atp13a3	125.8	119.2	128.5	131.6	127.8	124		124.5	127.8		0.0279908	0.421012	0.277454		Q5XF89;Q5XF89-2	Probable cation-transporting ATPase 13A3;Isoform 2 of Probable cation-transporting ATPase 13A3	AT133_MOUSE	Atp13a3	2870	2369	2091	1342	1518	1487		2443.33	1449		-0.74352	0.0279451	0.00154364
	ENSMUSG00000033161	ATPase, Na+/K+ transporting, alpha 1 polypeptide [Source:MGI Symbol;Acc:MGI:88105]	Atp1a1	364	377.8	381	401.9	374.9	370		374.267	382.267		0.0129098	0.490833	0.135536		Q8VDN2	Sodium/potassium-transporting ATPase subunit alpha-1	AT1A1_MOUSE	Atp1a1	198568	213426	231930	171159	196923	190033		214641	186038		-0.205947	0.0443712	0.0824045
	ENSMUSG00000032412	ATPase, Na+/K+ transporting, beta 3 polypeptide [Source:MGI Symbol;Acc:MGI:107788]	Atp1b3	327.1	321.8	337.8	408.7	356	352.7		328.9	372.467		0.133373	0.0508766	2.04724		P97370	Sodium/potassium-transporting ATPase subunit beta-3	AT1B3_MOUSE	Atp1b3	185582	192494	233141	196451	210426	173877		203739	193585		-0.0708411	0.177385	0.593497
	ENSMUSG00000030730	ATPase, Ca++ transporting, cardiac muscle, fast twitch 1 [Source:MGI Symbol;Acc:MGI:105058]	Atp2a1	0.3	0.1	0.3	0.3	0.3	0.3		0.233333	0.3		0.187101	0.466437	0.181126		Q8R429	Sarcoplasmic/endoplasmic reticulum calcium ATPase 1	AT2A1_MOUSE	Atp2a1	1452	2246	2357	446	1540	1964		2018.33	1316.67		-0.836837	0.0777816	0.196168
	ENSMUSG00000029467	ATPase, Ca++ transporting, cardiac muscle, slow twitch 2 [Source:MGI Symbol;Acc:MGI:88110]	Atp2a2	266.6	268	278.4	247.8	256.2	251		271	251.667		-0.093269	0.107501	1.43103		O55143	Sarcoplasmic/endoplasmic reticulum calcium ATPase 2	AT2A2_MOUSE	Atp2a2	118546	113740	118012	83508	102705	95077		116766	93763.3		-0.321486	0.0279451	0.0176393
	ENSMUSG00000020788	ATPase, Ca++ transporting, ubiquitous [Source:MGI Symbol;Acc:MGI:1194503]	Atp2a3	187.5	184.4	196.3	262.1	204.1	189.2		189.4	218.467		0.0977467	0.154165	1.13163		Q64518	Sarcoplasmic/endoplasmic reticulum calcium ATPase 3	AT2A3_MOUSE	Atp2a3	64339	62188	68640	58637	62889	54596		65055.7	58707.3		-0.149322	0.0637368	0.145846
	ENSMUSG00000019943	ATPase, Ca++ transporting, plasma membrane 1 [Source:MGI Symbol;Acc:MGI:104653]	Atp2b1	40.6	38.8	39.1	51.6	41	41.5		39.5	44.7		0.115201	0.135917	1.23722		G5E829	Plasma membrane calcium-transporting ATPase 1	AT2B1_MOUSE	Atp2b1	24220	24094	26652	23472	24641	23815		24988.7	23976		-0.0584148	0.152981	0.488961
	ENSMUSG00000026463	ATPase, Ca++ transporting, plasma membrane 4 [Source:MGI Symbol;Acc:MGI:88111]	Atp2b4	54.2	45.8	51.1	47.1	46.5	47.9		50.3667	47.1667		-0.0794634	0.286328	0.609522		Q6Q477	Plasma membrane calcium-transporting ATPase 4	AT2B4_MOUSE	Atp2b4	6337	6757	6732	5290	6324	5997		6608.67	5870.33		-0.174291	0.0546534	0.115958
	ENSMUSG00000032570	ATPase, Ca++-sequestering [Source:MGI Symbol;Acc:MGI:1889008]	Atp2c1	25.8	24.9	25.6	21.1	23.3	23.4		25.4333	22.6		-0.126236	0.0874366	1.61062		Q80XR2	Calcium-transporting ATPase type 2C member 1	AT2C1_MOUSE	Atp2c1	1096	906	757	504	668	675		919.667	615.667		-0.575274	0.0279451	0.0196576
	ENSMUSG00000025428	ATP synthase, H+ transporting, mitochondrial F1 complex, alpha subunit 1 [Source:MGI Symbol;Acc:MGI:88115]	Atp5a1	1042.2	1101	1116.5	1147.6	1142.9	1112.1		1086.57	1134.2		0.0613746	0.217274	0.833846		Q03265	ATP synthase subunit alpha, mitochondrial	ATPA_MOUSE	Atp5f1a	1844104	1803137	1785219	1538856	1705275	1668055		1810820	1.6374e+06		-0.1465	0.0521382	0.107109
	ENSMUSG00000025393	ATP synthase, H+ transporting mitochondrial F1 complex, beta subunit [Source:MGI Symbol;Acc:MGI:107801]	Atp5b	1164.2	1244.9	1208.3	1268.6	1249.8	1247.8		1205.8	1255.4		0.0680987	0.219464	0.824015		P56480	ATP synthase subunit beta, mitochondrial	ATPB_MOUSE	Atp5f1b	2262285	2096863	2062682	1851058	1952110	1915290		2140610	1.90615e+06		-0.166529	0.0419183	0.0744812
	ENSMUSG00000025781	ATP synthase, H+ transporting, mitochondrial F1 complex, gamma polypeptide 1 [Source:MGI Symbol;Acc:MGI:1261437]	Atp5c1	471.4	514.9	498.7	536.1	516.4	511.6		495	521.367		0.0735916	0.21825	0.829732		Q91VR2	ATP synthase subunit gamma, mitochondrial	ATPG_MOUSE	Atp5f1c	302681	298561	304334	273733	292967	270250		301859	278983		-0.114559	0.0707458	0.170597
	ENSMUSG00000003072	ATP synthase, H+ transporting, mitochondrial F1 complex, delta subunit [Source:MGI Symbol;Acc:MGI:1913293]	Atp5d	330.7	368	373.1	382.4	352.4	344.5		357.267	359.767		-0.024782	0.470527	0.1737		Q9D3D9	ATP synthase subunit delta, mitochondrial	ATPD_MOUSE	Atp5f1d	182682	165299	180640	157851	166664	141292		176207	155269		-0.184448	0.0508022	0.10263
	ENSMUSG00000016252	ATP synthase, H+ transporting, mitochondrial F1 complex, epsilon subunit [Source:MGI Symbol;Acc:MGI:1855697]	Atp5e	157.7	191.9	182.8	213.9	207.4	196		177.467	205.767		0.198364	0.121823	1.32778		P56382	ATP synthase subunit epsilon, mitochondrial	ATP5E_MOUSE	Atp5f1e	205592	204956	239177	210031	211433	204832		216575	208765		-0.049311	0.180324	0.60661
	ENSMUSG00000054428	ATPase inhibitory factor 1 [Source:MGI Symbol;Acc:MGI:1196457]	Atpif1	156.8	171	158.3	198.4	168.5	174.2		162.033	180.367		0.128347	0.162903	1.08553		O35143	ATPase inhibitor, mitochondrial	ATIF1_MOUSE	ATP5IF1	207458	176524	188704	173651	176912	174105		190895	174889		-0.123209	0.0811795	0.207361
	ENSMUSG00000071528	ATP synthase membrane subunit DAPIT [Source:MGI Symbol;Acc:MGI:1891435]	Atp5md	59.7	68.2	67.6	65.4	68.1	67.2		65.1667	66.9		0.0489692	0.42362	0.272166		Q78IK2	ATP synthase membrane subunit DAPIT, mitochondrial	ATPMD_MOUSE	Atp5md	340810	331499	354629	340593	347231	297299		342313	328374		-0.0628079	0.159924	0.517635
	ENSMUSG00000050856	ATP synthase, H+ transporting, mitochondrial F1F0 complex, subunit E [Source:MGI Symbol;Acc:MGI:106636]	Atp5k	394.8	427	427.8	410.4	440.7	420.9		416.533	424		0.0470719	0.406383	0.309398		Q06185	ATP synthase subunit e, mitochondrial	ATP5I_MOUSE	Atp5me	527071	545757	565546	539446	525622	517678		546125	527582		-0.0494471	0.160759	0.521304
	ENSMUSG00000038690	ATP synthase, H+ transporting, mitochondrial F0 complex, subunit F2 [Source:MGI Symbol;Acc:MGI:1927558]	Atp5j2	125.2	138.3	132.2	145.2	142.4	143.7		131.9	143.767		0.134566	0.102999	1.4695		P56135	ATP synthase subunit f, mitochondrial	ATPK_MOUSE	Atp5mf	543681	552545	565406	475756	545744	546163		553877	522554		-0.0867873	0.120669	0.358173
	ENSMUSG00000038717	ATP synthase, H+ transporting, mitochondrial F0 complex, subunit G [Source:MGI Symbol;Acc:MGI:1351597]	Atp5l	8.7	9.2	8.8	10.3	8.3	8		8.9	8.86667		-0.0645907	0.348127	0.445965		Q9CPQ8	ATP synthase subunit g, mitochondrial	ATP5L_MOUSE	Atp5mg	546236	506216	515843	445588	502463	501785		522765	483279		-0.114804	0.0877599	0.231429
	ENSMUSG00000000563	ATP synthase peripheral stalk-membrane subunit b [Source:MGI Symbol;Acc:MGI:1100495]	Atp5pb	301	323.2	318.9	304.6	324.3	331.5		314.367	320.133		0.059923	0.313976	0.531711		Q9CQQ7	ATP synthase F(0) complex subunit B1, mitochondrial	AT5F1_MOUSE	Atp5pb	201308	225298	217216	188902	180480	205006		214607	191463		-0.165075	0.0539573	0.113919
	ENSMUSG00000034566	ATP synthase, H+ transporting, mitochondrial F0 complex, subunit D [Source:MGI Symbol;Acc:MGI:1918929]	Atp5h	287.7	302.1	284	337.1	302.7	304		291.267	314.6		0.101508	0.16943	1.05363		Q9DCX2	ATP synthase subunit d, mitochondrial	ATP5H_MOUSE	Atp5pd	491650	516093	536504	478443	496817	454299		514749	476520		-0.111383	0.0821208	0.210845
	ENSMUSG00000022890	ATP synthase, H+ transporting, mitochondrial F0 complex, subunit F [Source:MGI Symbol;Acc:MGI:107777]	Atp5j	151.3	152.3	158.8	166	159.7	156.8		154.133	160.833		0.048948	0.336738	0.472341		P97450	ATP synthase-coupling factor 6, mitochondrial	ATP5J_MOUSE	Atp5pf	11854	11816	13051	12542	10401	8169		12240.3	10370.7		-0.259518	0.0701294	0.168278
	ENSMUSG00000022956	ATP synthase, H+ transporting, mitochondrial F1 complex, O subunit [Source:MGI Symbol;Acc:MGI:106341]	Atp5o	86.6	91.9	88.3	91.6	92.2	91.4		88.9333	91.7333		0.0660953	0.320364	0.516616		Q9DB20	ATP synthase subunit O, mitochondrial	ATPO_MOUSE	Atp5po	583895	536015	476108	415015	472375	494323		532006	460571		-0.206907	0.0564758	0.121866
	ENSMUSG00000019087	ATPase, H+ transporting, lysosomal accessory protein 1 [Source:MGI Symbol;Acc:MGI:109629]	Atp6ap1	109.2	113.7	114.5	98.8	107.6	109.3		112.467	105.233		-0.0571071	0.311386	0.539474		Q9R1Q9	V-type proton ATPase subunit S1	VAS1_MOUSE	Atp6ap1	9538	9206	8320	5958	7414	6604		9021.33	6658.67		-0.441475	0.0279451	0.00743935
	ENSMUSG00000031007	ATPase, H+ transporting, lysosomal accessory protein 2 [Source:MGI Symbol;Acc:MGI:1917745]	Atp6ap2	71	69.4	70.2	75.5	76.4	72.9		70.2	74.9333		0.108301	0.097924	1.51177		Q9CYN9	Renin receptor	RENR_MOUSE	Atp6ap2	8405	15053	11546	7993	8986	10617		11668	9198.67		-0.312609	0.0862108	0.225252
	ENSMUSG00000019302	ATPase, H+ transporting, lysosomal V0 subunit A1 [Source:MGI Symbol;Acc:MGI:103286]	Atp6v0a1	25.2	22.7	23.7	9.3	15.4	16.2		23.8667	13.6333		-0.646386	0.00255928	4.48754		Q9Z1G4;Q9Z1G4-2;Q9Z1G4-3	V-type proton ATPase 116 kDa subunit a1;Isoform A1-I of V-type proton ATPase 116 kDa subunit a1;Isoform A1-III of V-type proton ATPase 116 kDa subunit a1	VPP1_MOUSE	Atp6v0a1	429	460	303	65	167	245		397.333	159		-1.49693	0.02815	0.0232176
	ENSMUSG00000038023	ATPase, H+ transporting, lysosomal V0 subunit A2 [Source:MGI Symbol;Acc:MGI:104855]	Atp6v0a2	87	81	87.4	74.5	76.3	78.2		85.1333	76.3333		-0.138739	0.0417101	2.22156		P15920	V-type proton ATPase 116 kDa subunit a2	VPP2_MOUSE	Atp6v0a2	8882	9272	9107	5512	7834	7351		9087	6899		-0.413492	0.0288244	0.0291592
	ENSMUSG00000013160	ATPase, H+ transporting, lysosomal V0 subunit D1 [Source:MGI Symbol;Acc:MGI:1201778]	Atp6v0d1	107.6	118.5	109.9	102.3	107.5	110.8		112	106.867		-0.0206225	0.481929	0.153376		P51863	V-type proton ATPase subunit d 1	VA0D1_MOUSE	Atp6v0d1	28633	16552	16015	15244	18042	14776		20400	16020.7		-0.300417	0.0957179	0.263579
	ENSMUSG00000052459	ATPase, H+ transporting, lysosomal V1 subunit A [Source:MGI Symbol;Acc:MGI:1201780]	Atp6v1a	81.9	84.6	84.8	71.9	80.7	80.2		83.7667	77.6		-0.063211	0.275665	0.641925		P50516	V-type proton ATPase catalytic subunit A	VATA_MOUSE	Atp6v1a	158900	157285	170438	94652	120409	133904		162208	116322		-0.493633	0.0279451	0.0131142
	ENSMUSG00000006273	ATPase, H+ transporting, lysosomal V1 subunit B2 [Source:MGI Symbol;Acc:MGI:109618]	Atp6v1b2	81.3	83.1	81	70.6	74.5	79.7		81.8	74.9333		-0.0789204	0.226934	0.796504		P62814	V-type proton ATPase subunit B, brain isoform	VATB2_MOUSE	Atp6v1b2	120482	105082	104974	71398	91894	84027		110179	82439.7		-0.423147	0.0279451	0.0136428
	ENSMUSG00000022295	ATPase, H+ transporting, lysosomal V1 subunit C1 [Source:MGI Symbol;Acc:MGI:1913585]	Atp6v1c1	46	45.9	45.7	43.2	46.3	46.9		45.8667	45.4667		0.0312618	0.424049	0.270853		Q9Z1G3	V-type proton ATPase subunit C 1	VATC1_MOUSE	Atp6v1c1	46453	40715	35742	26111	31686	29534		40970	29110.3		-0.489358	0.0279451	0.00943785
	ENSMUSG00000021114	ATPase, H+ transporting, lysosomal V1 subunit D [Source:MGI Symbol;Acc:MGI:1921084]	Atp6v1d	47.4	49.3	49.9	49.1	48.7	50.8		48.8667	49.5333		0.0310826	0.43036	0.257137		P57746	V-type proton ATPase subunit D	VATD_MOUSE	Atp6v1d	23541	22745	24498	15774	20029	20027		23594.7	18610		-0.350601	0.0283715	0.0251334
	ENSMUSG00000019210	ATPase, H+ transporting, lysosomal V1 subunit E1 [Source:MGI Symbol;Acc:MGI:894326]	Atp6v1e1	49.7	56.4	54.1	49.4	52.6	51		53.4	51		-0.0391925	0.415566	0.289972		P50518	V-type proton ATPase subunit E 1	VATE1_MOUSE	Atp6v1e1	77920	71807	81547	54105	65510	66403		77091.3	62006		-0.318341	0.0288324	0.0294498
	ENSMUSG00000004285	ATPase, H+ transporting, lysosomal V1 subunit F [Source:MGI Symbol;Acc:MGI:1913394]	Atp6v1f	201.6	229	219.5	227	225.4	218.9		216.7	223.767		0.0508043	0.406089	0.309942		Q9D1K2	V-type proton ATPase subunit F	VATF_MOUSE	Atp6v1f	31034	33186	32423	23666	28511	17897		32214.3	23358		-0.48913	0.0290917	0.031308
	ENSMUSG00000039105	ATPase, H+ transporting, lysosomal V1 subunit G1 [Source:MGI Symbol;Acc:MGI:1913540]	Atp6v1g1	129.1	148.2	134.2	125.7	143.3	135.6		137.167	134.867		0.0396797	0.437862	0.239975		Q9CR51	V-type proton ATPase subunit G 1	VATG1_MOUSE	Atp6v1g1	62365	61687	63136	42508	52529	54875		62396	49970.7		-0.329056	0.0288244	0.0288238
	ENSMUSG00000033793	ATPase, H+ transporting, lysosomal V1 subunit H [Source:MGI Symbol;Acc:MGI:1914864]	Atp6v1h	20.3	21	20.4	21.6	21.5	21.9		20.5667	21.6667		0.0978839	0.172227	1.03796		Q8BVE3	V-type proton ATPase subunit H	VATH_MOUSE	Atp6v1h	33328	29466	30968	22548	31276	29623		31254	27815.7		-0.180597	0.0935963	0.254661
	ENSMUSG00000060671	ATPase, class I, type 8B, member 2 [Source:MGI Symbol;Acc:MGI:1859660]	Atp8b2	123	122	120.2	107.3	111.5	108.6		121.733	109.133		-0.126173	0.0400798	2.25679		P98199	Phospholipid-transporting ATPase ID	AT8B2_MOUSE	Atp8b2	316	328	459	406	429	492		367.667	442.333		0.283	0.0637366	0.145806
	ENSMUSG00000060131	ATPase, class I, type 8B, member 4 [Source:MGI Symbol;Acc:MGI:1859664]	Atp8b4	243.6	221.9	238.3	206.8	225.2	205.7		234.6	212.567		-0.114838	0.11211	1.39919		A2ANX3	Phospholipid-transporting ATPase	A2ANX3_MOUSE	Atp8b4	24274	7095	11606	12530	11984	19663		14325	14725.7		0.187607	0.201812	0.701296
	ENSMUSG00000028710	ATP synthase mitochondrial F1 complex assembly factor 1 [Source:MGI Symbol;Acc:MGI:2180560]	Atpaf1	9.8	8.5	8.5	10.8	8.6	9		8.93333	9.46667		0.054338	0.417173	0.286995		Q811I0	ATP synthase mitochondrial F1 complex assembly factor 1	ATPF1_MOUSE	Atpaf1	2849	3021	2970	2809	3011	3144		2946.67	2988		0.0189853	0.227349	0.820541
	ENSMUSG00000042709	ATP synthase mitochondrial F1 complex assembly factor 2 [Source:MGI Symbol;Acc:MGI:2180561]	Atpaf2	53.7	56.8	53.9	53.6	51.5	53.3		54.8	52.8		-0.0373721	0.403308	0.315749		Q91YY4	ATP synthase mitochondrial F1 complex assembly factor 2	ATPF2_MOUSE	Atpaf2	9785	9703	8446	8294	10228	8865		9311.33	9129		-0.0308767	0.222381	0.795549
	ENSMUSG00000032409	ataxia telangiectasia and Rad3 related [Source:MGI Symbol;Acc:MGI:108028]	Atr	9.8	8.8	10.1	10.4	8.8	9.1		9.56667	9.43333		-0.0770985	0.234942	0.770575		Q9JKK8	Serine/threonine-protein kinase ATR	ATR_MOUSE	Atr	1310	758	614	506	635	606		894	582.333		-0.548907	0.0512819	0.104198
	ENSMUSG00000025646	ATR interacting protein [Source:MGI Symbol;Acc:MGI:1925349]	Atrip	10.1	10.2	10.7	10.5	10	9.8		10.3333	10.1		-0.0576479	0.34119	0.462062		Q8BMG1	ATR-interacting protein	ATRIP_MOUSE	Atrip	3907	2447	1315	2107	1257	1449		2556.33	1604.33		-0.570635	0.0855661	0.222877
	ENSMUSG00000031229	ATRX, chromatin remodeler [Source:MGI Symbol;Acc:MGI:103067]	Atrx	42	36.8	41.1	42.9	38.3	37.4		39.9667	39.5333		-0.0515245	0.284794	0.614831		Q61687	Transcriptional regulator ATRX	ATRX_MOUSE	Atrx	11802	10581	7559	6870	7936	9955		9980.67	8253.67		-0.266138	0.0948774	0.259965
	ENSMUSG00000046876	ataxin 1 [Source:MGI Symbol;Acc:MGI:104783]	Atxn1	12.4	12.8	12	9.6	10.7	10.2		12.4	10.1667		-0.225338	0.0149847	3.01244		P54254	Ataxin-1	ATX1_MOUSE	Atxn1	2798	1883	2534	1970	2040	2353		2405	2121		-0.16586	0.121772	0.362533
	ENSMUSG00000016541	ataxin 10 [Source:MGI Symbol;Acc:MGI:1859293]	Atxn10	219.8	223.5	234.6	235.5	231.9	231.5		225.967	232.967		0.0389439	0.354983	0.42734		P28658	Ataxin-10	ATX10_MOUSE	Atxn10	81662	72277	72964	55265	63082	57502		75634.3	58616.3		-0.367727	0.0279451	0.00780526
	ENSMUSG00000042605	ataxin 2 [Source:MGI Symbol;Acc:MGI:1277223]	Atxn2	4	3.3	4.2	5	3.4	3.6		3.83333	4		-0.107233	0.315198	0.529078		O70305;O70305-2;O70305-3	Ataxin-2;Isoform 2 of Ataxin-2;Isoform 3 of Ataxin-2	ATX2_MOUSE	Atxn2	777	449	430	826	804	755		552	795		0.580282	0.0341003	0.0497525
	ENSMUSG00000032637	ataxin 2-like [Source:MGI Symbol;Acc:MGI:2446242]	Atxn2l	219.3	220	221.3	214.1	208.6	188.8		220.2	203.833		-0.12133	0.0732355	1.75415		Q7TQH0-2	Isoform 2 of Ataxin-2-like protein	ATX2L_MOUSE	Atxn2l	61961	66084	69019	51919	60208	58369		65688	56832		-0.210412	0.0390904	0.0649971
	ENSMUSG00000021189	ataxin 3 [Source:MGI Symbol;Acc:MGI:1099442]	Atxn3	20	17.9	18.9	22	18.2	20.9		18.9333	20.3667		0.0771292	0.280132	0.628636		Q9CVD2	Ataxin-3	ATX3_MOUSE	Atxn3	605	1673	2199	1161	1831	1656		1492.33	1549.33		0.22047	0.195399	0.672161
	ENSMUSG00000059995	ataxin 7-like 3 [Source:MGI Symbol;Acc:MGI:3036270]	Atxn7l3	109.8	108.9	108.1	119.9	112	105.3		108.933	112.4		0.0321322	0.382944	0.36118		A2AWT3;A2AWT3-2	Ataxin-7-like protein 3;Isoform 2 of Ataxin-7-like protein 3	AT7L3_MOUSE	Atxn7l3	1168	982	1038	856	905	875		1062.67	878.667		-0.270871	0.0284641	0.0261296
	ENSMUSG00000021460	AU RNA binding protein/enoyl-coenzyme A hydratase [Source:MGI Symbol;Acc:MGI:1338011]	Auh	19.8	19.6	20	17.5	19.3	17.3		19.8	18.0333		-0.101363	0.20254	0.894933		Q9JLZ3	Methylglutaconyl-CoA hydratase, mitochondrial	AUHM_MOUSE	Auh	27082	31158	22934	20216	24590	27312		27058	24039.3		-0.17044	0.1138	0.333377
	ENSMUSG00000068328	ancient ubiquitous protein 1 [Source:MGI Symbol;Acc:MGI:107789]	Aup1	146.3	153.4	154.2	144.1	148.6	141.4		151.3	144.7		-0.0530848	0.292313	0.59203		P70295	Ancient ubiquitous protein 1	AUP1_MOUSE	Aup1	28587	22532	31424	25010	25327	22974		27514.3	24437		-0.158673	0.105086	0.298583
	ENSMUSG00000027496	aurora kinase A [Source:MGI Symbol;Acc:MGI:894678]	Aurka	134.3	142.9	139.2	147.7	142.6	137.9		138.8	142.733		0.0383775	0.375409	0.377883		P97477;P97477-2	Aurora kinase A;Isoform 2 of Aurora kinase A	AURKA_MOUSE	Aurka	8796	7844	8036	6099	7224	7447		8225.33	6923.33		-0.252295	0.0365875	0.0574691
	ENSMUSG00000020897	aurora kinase B [Source:MGI Symbol;Acc:MGI:107168]	Aurkb	147.2	140.7	154.7	192.3	158.5	153.4		147.533	168.067		0.107028	0.156094	1.11952		O70126	Aurora kinase B	AURKB_MOUSE	Aurkb	60434	44209	107480	111335	90789	70070		70707.7	90731.3		0.434151	0.0956936	0.263456
	ENSMUSG00000003604	apoptosis, caspase activation inhibitor [Source:MGI Symbol;Acc:MGI:1921518]	Aven	20.7	21.5	22.1	23.3	22	21.9		21.4333	22.4		0.0468281	0.368011	0.39597		Q9D9K3	Cell death regulator Aven	AVEN_MOUSE	Aven	8408	6970	7259	6204	6922	6260		7545.67	6462		-0.220714	0.0426374	0.077284
	ENSMUSG00000025432	advillin [Source:MGI Symbol;Acc:MGI:1333798]	Avil	10.8	15.7	11	1.4	3.7	5.1		12.5	3.4		-1.58332	0.00101923	5.45431		O88398	Advillin	AVIL_MOUSE	Avil	375	469	198	0	93	127		347.333	73.3333		-1.58726	0.0279451	0.0111733
	ENSMUSG00000029787	AVL9 cell migration associated [Source:MGI Symbol;Acc:MGI:1926187]	Avl9	25.9	27.4	25.9	26.5	26.3	25.2		26.4	26		-0.00626733	0.536248	0.0461562		Q80U56	Late secretory pathway protein AVL9 homolog	AVL9_MOUSE	Avl9	2700	3071	2871	2339	2665	2529		2880.67	2511		-0.198209	0.0418491	0.0742271
	ENSMUSG00000060802	beta-2 microglobulin [Source:MGI Symbol;Acc:MGI:88127]	B2m	7244	7358	7261.8	6890	7291.7	7277.1		7287.93	7152.93		0.00962644	0.523105	0.0713518		P01887	Beta-2-microglobulin	B2MG_MOUSE	B2m	392686	556727	424692	280170	392254	444659		458035	372361		-0.308658	0.0797312	0.202657
	ENSMUSG00000050796	UDP-Gal:betaGal beta 1,3-galactosyltransferase, polypeptide 6 [Source:MGI Symbol;Acc:MGI:2152819]	B3galt6	9.6	7.7	10.1	11.8	9.7	10.5		9.13333	10.6667		0.135554	0.301457	0.567151		Q91Z92	Beta-1,3-galactosyltransferase 6	B3GT6_MOUSE	B3galt6	3832	3203	3120	2267	2604	2287		3385	2386		-0.501366	0.0279451	0.00470379
	ENSMUSG00000071649	beta-1,3-glucuronyltransferase 3 (glucuronosyltransferase I) [Source:MGI Symbol;Acc:MGI:1919977]	B3gat3	53	50.1	54.1	57.1	51.5	46.5		52.4	51.7		-0.0717877	0.239552	0.755485		P58158	Galactosylgalactosylxylosylprotein 3-beta-glucuronosyltransferase 3	B3GA3_MOUSE	B3gat3	3393	3267	3620	1029	2308	2942		3426.67	2093		-0.840611	0.0407951	0.0703786
	ENSMUSG00000006731	beta-1,4-N-acetyl-galactosaminyl transferase 1 [Source:MGI Symbol;Acc:MGI:1342057]	B4galnt1	302.1	293	314.2	350.3	300.7	292.6		303.1	314.533		-0.00495826	0.537811	0.0429093		Q09200	Beta-1,4 N-acetylgalactosaminyltransferase 1	B4GN1_MOUSE	B4galnt1	61328	59057	59158	52706	56501	58046		59847.7	55751		-0.103262	0.0863866	0.226024
	ENSMUSG00000028413	UDP-Gal:betaGlcNAc beta 1,4- galactosyltransferase, polypeptide 1 [Source:MGI Symbol;Acc:MGI:95705]	B4galt1	141.9	135.5	143.7	160.4	138.8	139.6		140.367	146.267		0.0153591	0.488725	0.138965		P15535;P15535-2	Beta-1,4-galactosyltransferase 1;Isoform Short of Beta-1,4-galactosyltransferase 1	B4GT1_MOUSE	B4galt1	11530	12080	9480	5743	9603	8211		11030	7852.33		-0.514636	0.0343902	0.050458
	ENSMUSG00000017929	UDP-Gal:betaGlcNAc beta 1,4-galactosyltransferase, polypeptide 5 [Source:MGI Symbol;Acc:MGI:1927169]	B4galt5	313.6	289	305.4	267.1	256.5	268.4		302.667	264		-0.190372	0.0341008	2.38346		Q9JMK0	Beta-1,4-galactosyltransferase 5	B4GT5_MOUSE	B4galt5	17547	15864	20496	9366	15479	17692		17969	14179		-0.38447	0.073721	0.1808
	ENSMUSG00000021504	xylosylprotein beta1,4-galactosyltransferase, polypeptide 7 (galactosyltransferase I) [Source:MGI Symbol;Acc:MGI:2384987]	B4galt7	49.2	42.3	48.3	60.6	45.6	46.6		46.6	50.9333		0.0256495	0.481878	0.153858		Q8R087	Beta-1,4-galactosyltransferase 7	B4GT7_MOUSE	B4galt7	1800	1451	1322	1409	1425	1349		1524.33	1394.33		-0.116748	0.130891	0.398787
	ENSMUSG00000031820	BRISC and BRCA1 A complex member 1 [Source:MGI Symbol;Acc:MGI:1915501]	Babam1	99	101.5	108.2	124.1	107.1	105.6		102.9	112.267		0.0627204	0.276986	0.638311		Q3UI43	BRISC and BRCA1-A complex member 1	BABA1_MOUSE	Babam1	23226	21516	26357	18511	23157	22814		23699.7	21494		-0.143195	0.107868	0.309679
	ENSMUSG00000052139	BRISC and BRCA1 A complex member 2 [Source:MGI Symbol;Acc:MGI:1333875]	Babam2	45.4	46.5	46.5	42.9	43.7	42.4		46.1333	43		-0.0857017	0.145637	1.17922		Q8K3W0	BRISC and BRCA1-A complex member 2	BABA2_MOUSE	Babam2	40345	37805	38571	29894	36848	33173		38907	33305		-0.229011	0.0384026	0.0629071
	ENSMUSG00000040270	BTB and CNC homology, basic leucine zipper transcription factor 2 [Source:MGI Symbol;Acc:MGI:894679]	Bach2	4.4	4	4.2	7.1	4.3	4.7		4.2	5.36667		0.167259	0.274382	0.64536		P97303;P97303-2	Transcription regulator protein BACH2;Isoform 2 of Transcription regulator protein BACH2	BACH2_MOUSE	Bach2	355	260	286	224	188	208		300.333	206.667		-0.53051	0.0279451	0.009457
	ENSMUSG00000028416	BCL2-associated athanogene 1 [Source:MGI Symbol;Acc:MGI:108047]	Bag1	356	376.2	367.9	361.6	379.3	360		366.7	366.967		0.0246185	0.447227	0.219875		Q60739	BAG family molecular chaperone regulator 1	BAG1_MOUSE	Bag1	18419	20766	22394	18780	20138	19102		20526.3	19340		-0.0818964	0.139948	0.435731
	ENSMUSG00000042215	BCL2-associated athanogene 2 [Source:MGI Symbol;Acc:MGI:1891254]	Bag2	11.9	11.9	11.3	12.4	12	11.3		11.7	11.9		0.040044	0.473017	0.168517		Q91YN9	BAG family molecular chaperone regulator 2	BAG2_MOUSE	Bag2	9114	8256	9101	6880	11080	8967		8823.67	8975.67		-0.000877492	0.262989	0.996272
	ENSMUSG00000037316	BCL2-associated athanogene 4 [Source:MGI Symbol;Acc:MGI:1914634]	Bag4	17.8	18.8	19.5	19	19.1	18.4		18.7	18.8333		0.0077582	0.533767	0.0511986		Q8CI61	BAG family molecular chaperone regulator 4	BAG4_MOUSE	Bag4	1661	1563	1266	1160	1212	1225		1496.67	1199		-0.310784	0.0316535	0.0408949
	ENSMUSG00000049792	BCL2-associated athanogene 5 [Source:MGI Symbol;Acc:MGI:1917619]	Bag5	45.2	50.9	46.6	49	49	51.5		47.5667	49.8333		0.102628	0.20958	0.865016		Q8CI32	BAG family molecular chaperone regulator 5	BAG5_MOUSE	Bag5	20838	12382	11338	9197	9886	10529		14852.7	9870.67		-0.537188	0.0391459	0.0653085
	ENSMUSG00000024392	BCL2-associated athanogene 6 [Source:MGI Symbol;Acc:MGI:1919439]	Bag6	117.9	118.7	124.8	131.2	118.8	115		120.467	121.667		-0.0246465	0.437952	0.239432		Q9Z1R2	Large proline-rich protein BAG6	BAG6_MOUSE	Bag6	42854	40323	42575	32066	36599	34065		41917.3	34243.3		-0.2933	0.0279451	0.0129914
	ENSMUSG00000025372	brain-specific angiogenesis inhibitor 1-associated protein 2 [Source:MGI Symbol;Acc:MGI:2137336]	Baiap2	41.6	38.9	36.7	31.6	34.4	37.4		39.0667	34.4667		-0.091959	0.230578	0.783953		Q8BKX1;Q8BKX1-2;Q8BKX1-3;Q8BKX1-4	Brain-specific angiogenesis inhibitor 1-associated protein 2;Isoform 2 of Brain-specific angiogenesis inhibitor 1-associated protein 2;Isoform 3 of Brain-specific angiogenesis inhibitor 1-associated protein 2;Isoform 4 of Brain-specific angiogenesis inhibitor 1-associated protein 2	BAIP2_MOUSE	Baiap2	7001	6158	6252	4089	5447	5587		6470.33	5041		-0.371686	0.031853	0.0417992
	ENSMUSG00000057789	BCL2-antagonist/killer 1 [Source:MGI Symbol;Acc:MGI:1097161]	Bak1	334.8	356.5	336.5	300.6	329.9	319.6		342.6	316.7		-0.0630264	0.343324	0.457189		O08734	Bcl-2 homologous antagonist/killer	BAK_MOUSE	Bak1	97123	91359	74504	57324	70762	64197		87662	64094.3		-0.448019	0.0279451	0.0167955
	ENSMUSG00000024844	BAF nuclear assembly factor 1 [Source:MGI Symbol;Acc:MGI:1346330]	Banf1	431.6	458.6	454	499.5	443.5	468		448.067	470.333		0.0459166	0.378482	0.371323		O54962	Barrier-to-autointegration factor	BAF_MOUSE	Banf1	163005	147298	144905	131097	124736	79718		151736	111850		-0.47209	0.0372313	0.0591785
	ENSMUSG00000025316	BTG3 associated nuclear protein [Source:MGI Symbol;Acc:MGI:1889023]	Banp	5	4.4	5	6.2	4.7	5.4		4.8	5.43333		0.0902399	0.36698	0.398153		Q8VBU8;Q8VBU8-2;Q8VBU8-3;Q8VBU8-4	Protein BANP;Isoform 2 of Protein BANP;Isoform 3 of Protein BANP;Isoform 4 of Protein BANP	BANP_MOUSE	Banp	1380	965	1008	1114	1070	1166		1117.67	1116.67		0.016721	0.247015	0.915871
	ENSMUSG00000020831	RIKEN cDNA 0610010K14 gene [Source:MGI Symbol;Acc:MGI:1915609]	0610010K14Rik	2.1	1.5	1.5	2.3	1	1.4		1.7	1.56667		-0.335783	0.257708	0.695291		Q9DCT6-2	Isoform 2 of Chromatin complexes subunit BAP18	BAP18_MOUSE	Bap18	43747	47971	47902	44948	44121	41625		46540	43564.7		-0.0947533	0.101775	0.285664
	ENSMUSG00000026196	BRCA1 associated RING domain 1 [Source:MGI Symbol;Acc:MGI:1328361]	Bard1	31.8	29.5	30.4	35.7	31.3	30		30.5667	32.3333		0.0493992	0.328566	0.494119		O70445	BRCA1-associated RING domain protein 1	BARD1_MOUSE	Bard1	121	137	152	150	144	126		136.667	140		0.0370669	0.216586	0.767936
	ENSMUSG00000045763	brain abundant, membrane attached signal protein 1 [Source:MGI Symbol;Acc:MGI:1917600]	Basp1	27.6	31	31.4	9.4	27.5	16.3		30	17.7333		-0.609025	0.0282242	2.53484		Q91XV3	Brain acid soluble protein 1	BASP1_MOUSE	Basp1	30382	34391	72058	12468	32137	56260		45610.3	33621.7		-0.579944	0.12648	0.380293
	ENSMUSG00000003873	BCL2-associated X protein [Source:MGI Symbol;Acc:MGI:99702]	Bax	162.4	146.4	143.4	166.6	157.8	148.3		150.733	157.567		0.0792704	0.206756	0.876491		Q07813	Apoptosis regulator BAX	BAX_MOUSE	Bax	218322	225789	249539	224491	236556	212356		231217	224468		-0.0417913	0.192222	0.658601
	ENSMUSG00000035021	bromodomain adjacent to zinc finger domain 1A [Source:MGI Symbol;Acc:MGI:1309478]	Baz1a	121.5	114.9	119	104.6	114.6	110.7		118.467	109.967		-0.066026	0.210563	0.857665		O88379	Bromodomain adjacent to zinc finger domain protein 1A	BAZ1A_MOUSE	Baz1a	19566	17214	17538	13761	15392	15037		18106	14730		-0.297044	0.0279451	0.0174821
	ENSMUSG00000002748	bromodomain adjacent to zinc finger domain, 1B [Source:MGI Symbol;Acc:MGI:1353499]	Baz1b	83.2	77.1	84.8	99.4	82.3	83.7		81.7	88.4667		0.0507679	0.288072	0.604362		Q9Z277	Tyrosine-protein kinase BAZ1B	BAZ1B_MOUSE	Baz1b	52202	49967	53105	51786	50136	48269		51758	50063.7		-0.0481408	0.165226	0.54131
	ENSMUSG00000040054	bromodomain adjacent to zinc finger domain, 2A [Source:MGI Symbol;Acc:MGI:2151152]	Baz2a	55.5	50.1	52.5	51.9	48.4	45.5		52.7	48.6		-0.130797	0.0674778	1.81977		Q91YE5;Q91YE5-2;Q91YE5-3	Bromodomain adjacent to zinc finger domain protein 2A;Isoform 2 of Bromodomain adjacent to zinc finger domain protein 2A;Isoform 3 of Bromodomain adjacent to zinc finger domain protein 2A	BAZ2A_MOUSE	Baz2a	1727	1778	1466	1277	1812	1768		1657	1619		-0.0459829	0.221195	0.78987
	ENSMUSG00000020650	B cell receptor associated protein 29 [Source:MGI Symbol;Acc:MGI:101917]	Bcap29	65.4	63.6	67.3	63.5	64.8	66		65.4333	64.7667		-0.0017256	0.555183	0.0118022		Q61334	B-cell receptor-associated protein 29	BAP29_MOUSE	Bcap29	37394	38197	36259	26105	31725	28883		37283.3	28904.3		-0.371479	0.0279451	0.0083458
	ENSMUSG00000002015	B cell receptor associated protein 31 [Source:MGI Symbol;Acc:MGI:1350933]	Bcap31	357.7	384.5	378.7	400.7	384.4	392.8		373.633	392.633		0.0708466	0.239999	0.753499		Q61335	B-cell receptor-associated protein 31	BAP31_MOUSE	Bcap31	113312	120436	123932	97611	107934	100770		119227	102105		-0.223928	0.0296571	0.0339629
	ENSMUSG00000005687	breast carcinoma amplified sequence 2 [Source:MGI Symbol;Acc:MGI:1915433]	Bcas2	58.4	58.8	62.3	62.7	60.1	60.7		59.8333	61.1667		0.0166853	0.484788	0.147737		Q9D287	Pre-mRNA-splicing factor SPF27	SPF27_MOUSE	Bcas2	73389	80110	77825	63031	78471	63008		77108	68170		-0.184675	0.0662149	0.154703
	ENSMUSG00000059439	breast carcinoma amplified sequence 3 [Source:MGI Symbol;Acc:MGI:2385848]	Bcas3	8.8	8.1	8.9	10.6	8.4	7.9		8.6	8.96667		-0.039528	0.465963	0.181843		Q8CCN5	Breast carcinoma-amplified sequence 3 homolog	BCAS3_MOUSE	Bcas3	652	700	736	707	676	659		696	680.667		-0.0309736	0.206154	0.720222
	ENSMUSG00000030268	branched chain aminotransferase 1, cytosolic [Source:MGI Symbol;Acc:MGI:104861]	Bcat1	32.5	30.9	31.7	26.7	30.6	29		31.7	28.7667		-0.0847477	0.260215	0.68801		P24288	Branched-chain-amino-acid aminotransferase, cytosolic	BCAT1_MOUSE	Bcat1	37844	37310	40494	21407	31981	29806		38549.3	27731.3		-0.495478	0.0281378	0.0231466
	ENSMUSG00000030826	branched chain aminotransferase 2, mitochondrial [Source:MGI Symbol;Acc:MGI:1276534]	Bcat2	43.1	45.9	43.8	41.6	44.3	43.3		44.2667	43.0667		0.000602353	0.558846	0.00364185		O35855	Branched-chain-amino-acid aminotransferase, mitochondrial	BCAT2_MOUSE	Bcat2	55266	48186	60129	43445	50952	48449		54527	47615.3		-0.192757	0.0639813	0.146752
	ENSMUSG00000030983	BRCA2 and CDKN1A interacting protein [Source:MGI Symbol;Acc:MGI:1913415]	Bccip	133.6	134.1	133.2	128.8	128.6	133.7		133.633	130.367		-0.0120302	0.512044	0.0921391		Q9CWI3	BRCA2 and CDKN1A-interacting protein	BCCIP_MOUSE	Bccip	48062	47579	45678	38385	40995	40098		47106.3	39826		-0.2424	0.0279451	0.0162099
	ENSMUSG00000060376	branched chain ketoacid dehydrogenase E1, alpha polypeptide [Source:MGI Symbol;Acc:MGI:107701]	Bckdha	23.9	28.6	27.2	45.3	30.2	29.6		26.5667	35.0333		0.233967	0.0943071	1.55205		P50136	2-oxoisovalerate dehydrogenase subunit alpha, mitochondrial	ODBA_MOUSE	Bckdha	1531	1593	1892	1799	1875	1673		1672	1782.33		0.0967969	0.133638	0.409497
	ENSMUSG00000032263	branched chain ketoacid dehydrogenase E1, beta polypeptide [Source:MGI Symbol;Acc:MGI:88137]	Bckdhb	7.7	9.2	9.4	9.2	7.7	6.1		8.76667	7.66667		-0.327705	0.0852303	1.6287		Q6P3A8;Q6P3A8-2	2-oxoisovalerate dehydrogenase subunit beta, mitochondrial;Isoform 2 of 2-oxoisovalerate dehydrogenase subunit beta, mitochondrial	ODBB_MOUSE	Bckdhb	776	155	368	332	417	543		433	430.667		0.254717	0.1961	0.675001
	ENSMUSG00000030802	branched chain ketoacid dehydrogenase kinase [Source:MGI Symbol;Acc:MGI:1276121]	Bckdk	47.5	49.3	49.8	56.3	52.7	50.2		48.8667	53.0667		0.0950714	0.133035	1.2585		O55028	[3-methyl-2-oxobutanoate dehydrogenase [lipoamide]] kinase, mitochondrial	BCKD_MOUSE	Bckdk	6703	4480	4288	4307	4702	3882		5157	4297		-0.237284	0.0956689	0.263143
	ENSMUSG00000028191	B cell leukemia/lymphoma 10 [Source:MGI Symbol;Acc:MGI:1337994]	Bcl10	24.1	27	24.1	26	27.1	23.8		25.0667	25.6333		0.0622948	0.345146	0.45169		Q9Z0H7	B-cell lymphoma/leukemia 10	BCL10_MOUSE	Bcl10	17536	15854	16860	12714	15223	14832		16750	14256.3		-0.235796	0.0365809	0.0574186
	ENSMUSG00000048251	B cell leukemia/lymphoma 11B [Source:MGI Symbol;Acc:MGI:1929913]	Bcl11b	36.5	32.9	38.7	44.1	35	36.4		36.0333	38.5		0.00151204	0.556998	0.00785779		Q99PV8;Q99PV8-2	B-cell lymphoma/leukemia 11B;Isoform 2 of B-cell lymphoma/leukemia 11B	BC11B_MOUSE	Bcl11b	3945	4477	4933	5195	5534	5773		4451.67	5500.67		0.309915	0.028803	0.0284101
	ENSMUSG00000057329	B cell leukemia/lymphoma 2 [Source:MGI Symbol;Acc:MGI:88138]	Bcl2	136.9	114.7	138	183.6	137.4	137.4		129.867	152.8		0.118235	0.192426	0.942138		P10417	Apoptosis regulator Bcl-2	BCL2_MOUSE	Bcl2	54180	44357	34297	28726	35005	35515		44278	33082		-0.402219	0.0425038	0.0765621
	ENSMUSG00000007659	BCL2-like 1 [Source:MGI Symbol;Acc:MGI:88139]	Bcl2l1	195.5	188.8	186.8	155.3	167.6	180.6		190.367	167.833		-0.122434	0.199007	0.912134		Q64373;Q64373-2;Q64373-3;Q64373-4	Bcl-2-like protein 1;Isoform Bcl-X(S) of Bcl-2-like protein 1;Isoform Bcl-X(beta) of Bcl-2-like protein 1;Isoform Bcl-X(delta-TM) of Bcl-2-like protein 1	B2CL1_MOUSE	Bcl2l1	29050	26559	23114	20131	21236	22617		26241	21328		-0.294389	0.0306535	0.0375383
	ENSMUSG00000027381	BCL2-like 11 (apoptosis facilitator) [Source:MGI Symbol;Acc:MGI:1197519]	Bcl2l11	27	21.9	25.2	35.8	22.4	28.7		24.7	28.9667		0.0950258	0.332728	0.483793		O54918	Bcl-2-like protein 11	B2L11_MOUSE	Bcl2l11	5186	5063	5396	4816	5481	5929		5215	5408.67		0.0478528	0.190313	0.650704
	ENSMUSG00000009112	BCL2-like 13 (apoptosis facilitator) [Source:MGI Symbol;Acc:MGI:2136959]	Bcl2l13	27.7	28.2	29	28.6	27.9	28.2		28.3	28.2333		-0.00472956	0.539184	0.0406197		P59017	Bcl-2-like protein 13	B2L13_MOUSE	Bcl2l13	17955	17484	19073	15073	17303	14015		18170.7	15463.7		-0.237331	0.0381581	0.0620401
	ENSMUSG00000029681	B cell CLL/lymphoma 7B [Source:MGI Symbol;Acc:MGI:1332238]	Bcl7b	41.5	41.9	44.8	45.2	44.1	44.3		42.7333	44.5333		0.0466549	0.3689	0.39406		Q921K9	B-cell CLL/lymphoma 7 protein family member B	BCL7B_MOUSE	Bcl7b	19713	17241	18598	17473	18788	17957		18517.3	18072.7		-0.033551	0.202893	0.706497
	ENSMUSG00000030814	B cell CLL/lymphoma 7C [Source:MGI Symbol;Acc:MGI:1332237]	Bcl7c	11.1	11.7	11.6	14.7	11.4	11.7		11.4667	12.6		0.0604147	0.382951	0.361123		O08664	B-cell CLL/lymphoma 7 protein family member C	BCL7C_MOUSE	Bcl7c	15728	16057	16515	15343	15970	15197		16100	15503.3		-0.0545277	0.14917	0.473922
	ENSMUSG00000037608	BCL2-associated transcription factor 1 [Source:MGI Symbol;Acc:MGI:1917580]	Bclaf1	89	91.2	90.5	86.7	90.3	84.8		90.2333	87.2667		-0.0280954	0.393776	0.336615		Q8K019;Q8K019-2	Bcl-2-associated transcription factor 1;Isoform 2 of Bcl-2-associated transcription factor 1	BCLF1_MOUSE	Bclaf1	34456	33989	39075	32683	36014	35018		35840	34571.7		-0.0502914	0.179421	0.602948
	ENSMUSG00000040363	BCL6 interacting corepressor [Source:MGI Symbol;Acc:MGI:1918708]	Bcor	61.2	56.3	59.7	72	60.7	61.6		59.0667	64.7667		0.0870799	0.134995	1.24171		Q8CGN4;Q8CGN4-2;Q8CGN4-3;Q8CGN4-4	BCL-6 corepressor;Isoform 2 of BCL-6 corepressor;Isoform 3 of BCL-6 corepressor;Isoform 4 of BCL-6 corepressor	BCOR_MOUSE	Bcor	1045	906	820	446	426	926		923.667	599.333		-0.713886	0.0389513	0.0644024
	ENSMUSG00000009681	BCR activator of RhoGEF and GTPase [Source:MGI Symbol;Acc:MGI:88141]	Bcr	56.8	56.7	57.9	27.1	43.1	39.3		57.1333	36.5		-0.516638	0.00144394	5.13432		Q6PAJ1	Breakpoint cluster region protein	BCR_MOUSE	Bcr	4016	3976	3931	1850	2883	2975		3974.33	2569.33		-0.661329	0.0279451	0.0141565
	ENSMUSG00000026172	BCS1-like (yeast) [Source:MGI Symbol;Acc:MGI:1914071]	Bcs1l	17.7	16.9	17.7	18.1	14.3	14.4		17.4333	15.6		-0.237972	0.03826	2.29084		Q9CZP5	Mitochondrial chaperone BCS1	BCS1_MOUSE	Bcs1l	15119	8245	9809	8949	9507	10256		11057.7	9570.67		-0.162268	0.15647	0.503198
	ENSMUSG00000046598	3-hydroxybutyrate dehydrogenase, type 1 [Source:MGI Symbol;Acc:MGI:1919161]	Bdh1	46	47	48.4	50.7	47	47.9		47.1333	48.5333		0.0209305	0.472482	0.169892		Q80XN0	D-beta-hydroxybutyrate dehydrogenase, mitochondrial	BDH_MOUSE	Bdh1	105783	94065	100991	87606	96219	88052		100280	90625.7		-0.145714	0.0623616	0.141568
	ENSMUSG00000035086	beclin 1, autophagy related [Source:MGI Symbol;Acc:MGI:1891828]	Becn1	78.6	76.8	76.3	74.5	76.4	68.9		77.2333	73.2667		-0.0607049	0.210605	0.857493		O88597	Beclin-1	BECN1_MOUSE	Becn1	4013	3494	5676	2163	4024	3059		4394.33	3082		-0.52657	0.0527633	0.10926
	ENSMUSG00000038214	BEN domain containing 3 [Source:MGI Symbol;Acc:MGI:2677212]	Bend3	16.8	18.1	18.2	17.9	18.5	18.2		17.7	18.2		0.0472598	0.411864	0.298556		Q6PAL0	BEN domain-containing protein 3	BEND3_MOUSE	Bend3	54	84	93	86	91	66		77	81		0.0973633	0.201015	0.697388
	ENSMUSG00000032757	Bet1 golgi vesicular membrane trafficking protein [Source:MGI Symbol;Acc:MGI:1343104]	Bet1	16.2	15.6	14.6	13.8	15.3	14.5		15.4667	14.5333		-0.0141308	0.524351	0.0695669		O35623	BET1 homolog	BET1_MOUSE	Bet1	1949	12441	14231	11330	11080	13252		9540.33	11887.3		0.756457	0.121053	0.359798
	ENSMUSG00000030103	basic helix-loop-helix family, member e40 [Source:MGI Symbol;Acc:MGI:1097714]	Bhlhe40	333.7	352.3	324.2	242	292.6	276.3		336.733	270.3		-0.231934	0.0450637	2.15022		O35185	Class E basic helix-loop-helix protein 40	BHE40_MOUSE	Bhlhe40	3926	3461	3223	2376	2869	2588		3536.67	2611		-0.437244	0.0279451	0.00906566
	ENSMUSG00000037933	BICD cargo adaptor 2 [Source:MGI Symbol;Acc:MGI:1924145]	Bicd2	57.1	56.1	57.9	53.6	57	52.1		57.0333	54.2333		-0.0552276	0.254509	0.706754		Q921C5;Q921C5-2	Protein bicaudal D homolog 2;Isoform 2 of Protein bicaudal D homolog 2	BICD2_MOUSE	Bicd2	15783	14446	15479	10186	12489	12145		15236	11606.7		-0.397249	0.0279451	0.00946817
	ENSMUSG00000070808	BRD4 interacting chromatin remodeling complex associated protein [Source:MGI Symbol;Acc:MGI:2154263]	Bicra	8.5	7.6	8.5	9.8	7.4	6.8		8.2	8		-0.157763	0.113972	1.38779		F8VPZ9	BRD4-interacting chromatin-remodeling complex-associated protein	BICRA_MOUSE	Bicra	86	72	93	158	176	157		83.6667	163.667		0.974162	0.0279451	0.000190664
	ENSMUSG00000004446	BH3 interacting domain death agonist [Source:MGI Symbol;Acc:MGI:108093]	Bid	38.3	32.8	37.1	35	35.8	35.3		36.0667	35.3667		-0.0178807	0.501174	0.114425		P70444	BH3-interacting domain death agonist	BID_MOUSE	Bid	14397	11676	11604	12029	11829	10932		12559	11596.7		-0.108845	0.12407	0.37155
	ENSMUSG00000024381	bridging integrator 1 [Source:MGI Symbol;Acc:MGI:108092]	Bin1	83.1	83.2	82.2	71.4	73.2	76.9		82.8333	73.8333		-0.130011	0.0779191	1.70753		O08539-2	Isoform 2 of Myc box-dependent-interacting protein 1	BIN1_MOUSE	Bin1	73615	78889	81276	57187	66677	66525		77926.7	63463		-0.298627	0.0279451	0.0212369
	ENSMUSG00000098112	bridging integrator 2 [Source:MGI Symbol;Acc:MGI:3611448]	Bin2	209.6	204.9	215.5	247.3	215.3	217		210	226.533		0.0661206	0.230722	0.783565		D3Z6Q9	Bridging integrator 2	BIN2_MOUSE	Bin2	100281	126142	132999	97117	111120	96014		119807	101417		-0.233094	0.0596743	0.13331
	ENSMUSG00000057367	baculoviral IAP repeat-containing 2 [Source:MGI Symbol;Acc:MGI:1197009]	Birc2	28.2	24.5	26.1	29.1	22.7	24.8		26.2667	25.5333		-0.0950195	0.213544	0.847208		Q62210	Baculoviral IAP repeat-containing protein 2	BIRC2_MOUSE	Birc2	1669	1473	1678	1276	1881	2092		1606.67	1749.67		0.094509	0.189497	0.646964
	ENSMUSG00000017716	baculoviral IAP repeat-containing 5 [Source:MGI Symbol;Acc:MGI:1203517]	Birc5	171.5	164.4	176	220	182.4	180.3		170.633	194.233		0.119648	0.110959	1.4074		O70201	Baculoviral IAP repeat-containing protein 5	BIRC5_MOUSE	Birc5	15969	14839	22997	21530	20941	9255		17935	17242		-0.128377	0.210655	0.740447
	ENSMUSG00000024073	baculoviral IAP repeat-containing 6 [Source:MGI Symbol;Acc:MGI:1276108]	Birc6	37.7	33.7	37.6	36.4	34.8	33.9		36.3333	35.0333		-0.0674146	0.31962	0.518561		O88738;O88738-2;O88738-3	Baculoviral IAP repeat-containing protein 6;Isoform 2 of Baculoviral IAP repeat-containing protein 6;Isoform 3 of Baculoviral IAP repeat-containing protein 6	BIRC6_MOUSE	Birc6	14579	13621	12876	8974	11338	11263		13692	10525		-0.385943	0.0279451	0.0186135
	ENSMUSG00000047423	expressed sequence AI837181 [Source:MGI Symbol;Acc:MGI:2147598]	AI837181	46.7	49.1	47.8	57.6	42.7	48.9		47.8667	49.7333		-0.0186804	0.509129	0.0970143		Q8VD62	UPF0696 protein C11orf68 homolog	CK068_MOUSE	Bles03	14653	13226	17418	14790	14752	13371		15099	14304.3		-0.0701706	0.176109	0.587767
	ENSMUSG00000030528	Bloom syndrome, RecQ like helicase [Source:MGI Symbol;Acc:MGI:1328362]	Blm	37.1	35.4	36.7	39.3	34.3	36		36.4	36.5333		-0.0215549	0.447993	0.217263		O88700	Bloom syndrome protein homolog	BLM_MOUSE	Blm	307	327	270	250	224	196		301.333	223.333		-0.434736	0.0279451	0.0135846
	ENSMUSG00000020840	bleomycin hydrolase [Source:MGI Symbol;Acc:MGI:1345186]	Blmh	64.5	65.7	67.3	71.7	69.9	72.8		65.8333	71.4667		0.122357	0.0650665	1.85065		Q8R016	Bleomycin hydrolase	BLMH_MOUSE	Blmh	149330	149672	148854	122810	127690	129290		149285	126597		-0.238174	0.0279451	0.0141055
	ENSMUSG00000090247	biogenesis of lysosomal organelles complex-1, subunit 1 [Source:MGI Symbol;Acc:MGI:1195276]	Bloc1s1	2.4	3.1	2	2.2	3.4	2.7		2.5	2.76667		0.395823	0.19545	0.929985		O55102	Biogenesis of lysosome-related organelles complex 1 subunit 1	BL1S1_MOUSE	Bloc1s1	5836	5571	7431	6112	7409	6139		6279.33	6553.33		0.0674848	0.192364	0.659402
	ENSMUSG00000057667	biogenesis of lysosomal organelles complex-1, subunit 3 [Source:MGI Symbol;Acc:MGI:2678952]	Bloc1s3	5.8	6.2	5.6	5.8	5.4	6.2		5.86667	5.8		0.0265869	0.509204	0.0966963		Q5U5M8	Biogenesis of lysosome-related organelles complex 1 subunit 3	BL1S3_MOUSE	Bloc1s3	1217	1611	1188	904	1155	992		1338.67	1017		-0.389707	0.033752	0.0486343
	ENSMUSG00000060708	biogenesis of lysosomal organelles complex-1, subunit 4, cappuccino [Source:MGI Symbol;Acc:MGI:1929230]	Bloc1s4	24.6	29.5	30.9	27.2	32.2	24.1		28.3333	27.8333		-0.049781	0.468668	0.176958		Q8VED2	Biogenesis of lysosome-related organelles complex 1 subunit 4	BL1S4_MOUSE	Bloc1s4	4187	3276	3121	2482	2839	2688		3528	2669.67		-0.392147	0.0285578	0.0270127
	ENSMUSG00000038982	biogenesis of lysosomal organelles complex-1, subunit 5, muted [Source:MGI Symbol;Acc:MGI:2178598]	Bloc1s5	4.4	4.9	4.7	4.3	4.8	5		4.66667	4.7		0.053671	0.42158	0.276499		Q8R015	Biogenesis of lysosome-related organelles complex 1 subunit 5	BL1S5_MOUSE	Bloc1s5	1391	2677	2681	2189	2417	2506		2249.67	2370.67		0.136455	0.186196	0.63214
	ENSMUSG00000005804	biogenesis of lysosomal organelles complex-1, subunit 6, pallidin [Source:MGI Symbol;Acc:MGI:1927580]	Bloc1s6	34.3	31.5	34.1	33.4	33.6	33.4		33.3	33.4667		0.0164121	0.49922	0.120505		Q9R0C0	Biogenesis of lysosome-related organelles complex 1 subunit 6	BL1S6_MOUSE	Bloc1s6	4222	2381	2194	1349	2226	2346		2932.33	1973.67		-0.548837	0.0633065	0.144328
	ENSMUSG00000001999	biliverdin reductase A [Source:MGI Symbol;Acc:MGI:88170]	Blvra	48.2	51.7	50	45.1	52.6	49.7		49.9667	49.1333		0.035661	0.443605	0.227927		Q9CY64	Biliverdin reductase A	BIEA_MOUSE	Blvra	139751	129320	135231	96623	111915	110688		134767	106409		-0.343296	0.0279451	0.00938338
	ENSMUSG00000040466	biliverdin reductase B (flavin reductase (NADPH)) [Source:MGI Symbol;Acc:MGI:2385271]	Blvrb	2.2	2.5	2.5	1.6	2.5	1.9		2.4	2		-0.1671	0.338327	0.469354		Q923D2	Flavin reductase (NADPH)	BLVRB_MOUSE	Blvrb	2652	2220	2127	1548	2111	1936		2333	1865		-0.32835	0.0414712	0.0724762
	ENSMUSG00000034663	BMP2 inducible kinase [Source:MGI Symbol;Acc:MGI:2155456]	Bmp2k	35.3	36.6	38.7	41.7	38.9	36.8		36.8667	39.1333		0.0470234	0.363657	0.405477		Q91Z96	BMP-2-inducible protein kinase	BMP2K_MOUSE	Bmp2k	3054	4272	3511	3155	3326	3377		3612.33	3286		-0.123441	0.130421	0.396578
	ENSMUSG00000030138	BMS1, ribosome biogenesis factor [Source:MGI Symbol;Acc:MGI:2446132]	Bms1	123.3	129.3	130.9	120.4	122	119.5		127.833	120.633		-0.0759578	0.156643	1.11652		Q6PGF5	BMS1 homolog, ribosome assembly protein (Yeast)	Q6PGF5_MOUSE	Bms1	23085	21559	21254	17449	20257	20090		21966	19265.3		-0.191646	0.0452487	0.0853476
	ENSMUSG00000024191	BCL2/adenovirus E1B interacting protein 1 [Source:MGI Symbol;Acc:MGI:109328]	Bnip1	17.7	17	17.8	18.4	16.5	18.8		17.5	17.9		0.0256393	0.484105	0.149295		Q6QD59	Vesicle transport protein SEC20	SEC20_MOUSE	Bnip1	35193	33901	32729	11672	28663	28338		33941	22891		-0.680736	0.0519387	0.106411
	ENSMUSG00000011958	BCL2/adenovirus E1B interacting protein 2 [Source:MGI Symbol;Acc:MGI:109327]	Bnip2	141.1	138.1	139.1	124.7	128.8	128.7		139.433	127.4		-0.100871	0.0762171	1.72365		O54940	BCL2/adenovirus E1B 19 kDa protein-interacting protein 2	BNIP2_MOUSE	Bnip2	7337	6714	5843	3863	4585	4830		6631.33	4426		-0.583469	0.0279451	0.00422131
	ENSMUSG00000078566	BCL2/adenovirus E1B interacting protein 3 [Source:MGI Symbol;Acc:MGI:109326]	Bnip3	207	227	212.9	151.7	209.9	199.4		215.633	187		-0.0938222	0.312161	0.536723		O55003	BCL2/adenovirus E1B 19 kDa protein-interacting protein 3	BNIP3_MOUSE	Bnip3	28681	29162	30417	24705	30710	24326		29420	26580.3		-0.154351	0.0852541	0.221628
	ENSMUSG00000061755	biorientation of chromosomes in cell division 1-like [Source:MGI Symbol;Acc:MGI:2444804]	Bod1l	27.9	25.4	26.8	29.6	26.1	23.9		26.7	26.5333		-0.0526308	0.311113	0.540213		E9Q6J5;E9Q6J5-3	Biorientation of chromosomes in cell division protein 1-like 1;Isoform New of Biorientation of chromosomes in cell division protein 1-like 1	BD1L1_MOUSE	Bod1l	3558	3300	2264	3246	3654	2588		3040.67	3162.67		0.0691903	0.214272	0.757942
	ENSMUSG00000015943	bolA-like 1 (E. coli) [Source:MGI Symbol;Acc:MGI:1916418]	Bola1	17.8	19.5	26	19.8	17.8	23.3		21.1	20.3		-0.151993	0.359541	0.417084		Q9D8S9	BolA-like protein 1	BOLA1_MOUSE	Bola1	66160	65361	70906	57391	66374	58564		67475.7	60776.3		-0.152947	0.0631546	0.143748
	ENSMUSG00000047721	bolA-like 2 (E. coli) [Source:MGI Symbol;Acc:MGI:1913412]	Bola2	29.6	32.9	32	29.6	31.2	31.2		31.5	30.6667		-0.0114589	0.53409	0.0502808		Q8BGS2	BolA-like protein 2	BOLA2_MOUSE	Bola2	152645	156437	153465	99801	129511	98515		154182	109276		-0.508352	0.0279451	0.00665059
	ENSMUSG00000045160	bolA-like 3 (E. coli) [Source:MGI Symbol;Acc:MGI:1925903]	Bola3	29.8	32.1	28.5	30.2	30.2	31.1		30.1333	30.5		0.072132	0.322485	0.510262		Q8CEI1	BolA-like protein 3	BOLA3_MOUSE	Bola3	5948	6814	6942	4249	4574	4527		6568	4450		-0.559041	0.0279451	0.00093501
	ENSMUSG00000022557	block of proliferation 1 [Source:MGI Symbol;Acc:MGI:1334460]	Bop1	200.4	205.1	215.5	199.3	196	203.5		207	199.6		-0.0536869	0.334367	0.479488		P97452	Ribosome biogenesis protein BOP1	BOP1_MOUSE	Bop1	60122	82502	89128	70622	75253	71357		77250.7	72410.7		-0.0737597	0.192227	0.658828
	ENSMUSG00000022070	bora, aurora kinase A activator [Source:MGI Symbol;Acc:MGI:1924994]	Bora	31.8	30	32.6	35.6	28.2	31		31.4667	31.6		-0.0644027	0.321089	0.514559		Q8BS90	Protein aurora borealis	BORA_MOUSE	Bora	476	263	380	223	230	591		373	348		-0.216729	0.186851	0.635563
	ENSMUSG00000042992	BLOC-1 related complex subunit 5 [Source:MGI Symbol;Acc:MGI:1915024]	Borcs5	13.9	12.9	14	14.8	12	12.4		13.6	13.0667		-0.126736	0.204221	0.88666		Q9D920	BLOC-1-related complex subunit 5	BORC5_MOUSE	Borcs5	15373	11292	15600	13555	12995	13214		14088.3	13254.7		-0.0727989	0.18491	0.626561
	ENSMUSG00000038286	biphenyl hydrolase-like (serine hydrolase, breast epithelial mucin-associated antigen) [Source:MGI Symbol;Acc:MGI:1915271]	Bphl	3.8	3.5	2.9	4.5	3.3	3.8		3.4	3.86667		0.190454	0.300753	0.569588		Q8R164	Valacyclovir hydrolase	BPHL_MOUSE	Bphl	1290	1224	1198	1267	1060	984		1237.33	1103.67		-0.172464	0.0738765	0.181302
	ENSMUSG00000026617	3'(2'), 5'-bisphosphate nucleotidase 1 [Source:MGI Symbol;Acc:MGI:1338800]	Bpnt1	31.5	34.2	34.9	31.1	34.8	33.3		33.5333	33.0667		0.00606625	0.542566	0.0337552		Q9Z0S1	3'(2'),5'-bisphosphate nucleotidase 1	BPNT1_MOUSE	Bpnt1	43531	30638	33984	21363	53020	30502		36051	34961.7		-0.130555	0.205139	0.715889
	ENSMUSG00000066324	3'(2'), 5'-bisphosphate nucleotidase 2 [Source:MGI Symbol;Acc:MGI:1915720]	Bpnt2	49.9	48.2	50.2	49.4	50.4	48.3		49.4333	49.3667		0.00984067	0.521585	0.0744645		Q80V26	Golgi-resident adenosine 3',5'-bisphosphate 3'-phosphatase	IMPA3_MOUSE	Bpnt2	3413	3490	3309	3491	3487	3110		3404	3362.67		-0.0193738	0.227754	0.823001
	ENSMUSG00000040481	bromodomain PHD finger transcription factor [Source:MGI Symbol;Acc:MGI:2444008]	Bptf	55.4	53	55.6	59.1	54.9	50.9		54.6667	54.9667		-0.0213303	0.45308	0.208261		A2A654;A2A655;E9Q6A7	Bromodomain PHD finger transcription factor	A2A654_MOUSE;A2A655_MOUSE;E9Q6A7_MOUSE	Bptf	4448	2431	2760	2534	2596	2126		3213	2418.67		-0.364509	0.0729105	0.178213
	ENSMUSG00000029458	BRCA1 associated protein [Source:MGI Symbol;Acc:MGI:1919649]	Brap	29.4	29.3	29.7	31.2	29.8	29.5		29.4667	30.1667		0.0319655	0.386544	0.351689		Q99MP8;Q99MP8-2	BRCA1-associated protein;Isoform 2 of BRCA1-associated protein	BRAP_MOUSE	Brap	3072	3371	3130	2595	3117	2901		3191	2871		-0.155358	0.0688159	0.163586
	ENSMUSG00000000148	BRCA1-associated ATM activator 1 [Source:MGI Symbol;Acc:MGI:1891679]	Brat1	11.8	10.3	12.2	12.5	9.8	10.9		11.4333	11.0667		-0.130666	0.184166	0.978334		Q8C3R1	BRCA1-associated ATM activator 1	BRAT1_MOUSE	Brat1	6110	5703	5044	3975	3923	4385		5619	4094.33		-0.453991	0.0279451	0.00454916
	ENSMUSG00000017146	breast cancer 1, early onset [Source:MGI Symbol;Acc:MGI:104537]	Brca1	30.9	29	30.9	38.5	32.5	31.6		30.2667	34.2		0.116234	0.0888263	1.59652		P48754	Breast cancer type 1 susceptibility protein homolog	BRCA1_MOUSE	Brca1	749	546	588	557	588	564		627.667	569.667		-0.126831	0.125165	0.375515
	ENSMUSG00000031201	BRCA1/BRCA2-containing complex, subunit 3 [Source:MGI Symbol;Acc:MGI:2389572]	Brcc3	28	27.2	26.4	28.3	27.2	26.6		27.2	27.3667		0.0223378	0.447719	0.21785		P46737	Lys-63-specific deubiquitinase BRCC36	BRCC3_MOUSE	Brcc3	23454	22701	24530	19792	22217	21169		23561.7	21059.3		-0.162868	0.0484588	0.095076
	ENSMUSG00000022387	bromodomain containing 1 [Source:MGI Symbol;Acc:MGI:1924161]	Brd1	39.7	42.9	42	46.6	45.3	39.1		41.5333	43.6667		0.0487849	0.365637	0.400919		G5E8P1-2	Isoform 2 of Bromodomain-containing protein 1	BRD1_MOUSE	Brd1	1609	1587	1357	1268	1436	1381		1517.67	1361.67		-0.154188	0.0746205	0.183782
	ENSMUSG00000024335	bromodomain containing 2 [Source:MGI Symbol;Acc:MGI:99495]	Brd2	139.7	146.9	144.3	160.7	152.6	142		143.633	151.767		0.0645138	0.228627	0.789961		Q7JJ13	Bromodomain-containing protein 2	BRD2_MOUSE	Brd2	10221	10248	11498	10207	10723	10233		10655.7	10387.7		-0.0349217	0.199381	0.6899
	ENSMUSG00000026918	bromodomain containing 3 [Source:MGI Symbol;Acc:MGI:1914632]	Brd3	18.3	17.3	18.9	28.8	19.2	20.2		18.1667	22.7333		0.16675	0.0864275	1.61864		Q8K2F0	Bromodomain-containing protein 3	BRD3_MOUSE	Brd3	4936	4305	5058	4925	5297	4933		4766.33	5051.67		0.0866139	0.12936	0.391572
	ENSMUSG00000024002	bromodomain containing 4 [Source:MGI Symbol;Acc:MGI:1888520]	Brd4	80	76.7	78.7	85.6	75	71.6		78.4667	77.4		-0.0596307	0.209092	0.867064		Q9ESU6	Bromodomain-containing protein 4	BRD4_MOUSE	Brd4	18232	16132	18478	16975	19412	18303		17614	18230		0.0500779	0.183446	0.620202
	ENSMUSG00000031660	bromodomain containing 7 [Source:MGI Symbol;Acc:MGI:1349766]	Brd7	52.7	52.2	53.7	54.9	50.6	51.7		52.8667	52.4		-0.0280696	0.404958	0.312258		O88665	Bromodomain-containing protein 7	BRD7_MOUSE	Brd7	2598	2231	3097	2846	3074	2781		2642	2900.33		0.146231	0.110674	0.321068
	ENSMUSG00000003778	bromodomain containing 8 [Source:MGI Symbol;Acc:MGI:1925906]	Brd8	33.3	29.9	31.6	34.7	31.1	28.4		31.6	31.4		-0.0458806	0.364187	0.403986		Q8R3B7;Q8R3B7-2	Bromodomain-containing protein 8;Isoform 2 of Bromodomain-containing protein 8	BRD8_MOUSE	Brd8	2852	2988	2691	2744	3088	3319		2843.67	3050.33		0.0981351	0.122421	0.365608
	ENSMUSG00000057649	bromodomain containing 9 [Source:MGI Symbol;Acc:MGI:2145317]	Brd9	34.7	32.7	35.2	40.4	34.4	34.1		34.2	36.3		0.029738	0.424962	0.2686		Q3UQU0	Bromodomain-containing protein 9	BRD9_MOUSE	Brd9	6813	6547	6195	5810	7577	6870		6518.33	6752.33		0.0434155	0.20733	0.725579
	ENSMUSG00000011158	BRF1, RNA polymerase III transcription initiation factor 90 kDa subunit [Source:MGI Symbol;Acc:MGI:1919558]	Brf1	27.9	26.2	27.8	28.8	23.6	23.2		27.3	25.2		-0.180774	0.0294975	2.50049		Q8CFK2	Transcription factor IIIB 90 kDa subunit	TF3B_MOUSE	Brf1	276	1597	1872	947	1184	2346		1248.33	1492.33		0.557541	0.157835	0.50949
	ENSMUSG00000037905	Bri3 binding protein [Source:MGI Symbol;Acc:MGI:1924059]	Bri3bp	38.6	37.6	41	43.7	40.5	37		39.0667	40.4		0.0013967	0.556219	0.00955584		Q8BXV2	BRI3-binding protein	BRI3B_MOUSE	Bri3bp	27784	30825	33519	25372	29520	27316		30709.3	27402.7		-0.162886	0.0721649	0.175798
	ENSMUSG00000034329	BRCA1 interacting protein C-terminal helicase 1 [Source:MGI Symbol;Acc:MGI:2442836]	Brip1	18.6	17.7	19.8	26.1	19.7	20.3		18.7	22.0333		0.12217	0.141472	1.20245		Q5SXJ3	Fanconi anemia group J protein homolog	FANCJ_MOUSE	Brip1	1815	1156	1187	1077	1277	1183		1386	1179		-0.204735	0.113463	0.331955
	ENSMUSG00000022247	BRX1, biogenesis of ribosomes [Source:MGI Symbol;Acc:MGI:1915082]	Brix1	145.9	159.7	155.4	150.2	160.1	153.2		153.667	154.5		0.0342953	0.425029	0.268363		Q9DCA5	Ribosome biogenesis protein BRX1 homolog	BRX1_MOUSE	Brix1	146159	122763	86867	125364	103498	101726		118596	110196		-0.07996	0.204707	0.714046
	ENSMUSG00000012076	breast cancer metastasis-suppressor 1-like [Source:MGI Symbol;Acc:MGI:1196337]	Brms1l	16.2	14.4	14.2	20.1	15.6	15.4		14.9333	17.0333		0.139694	0.189936	0.953625		Q3U1T3	Breast cancer metastasis-suppressor 1-like protein	BRM1L_MOUSE	Brms1l	1118	1229	996	980	1533	434		1114.33	982.333		-0.356548	0.144892	0.455409
	ENSMUSG00000046836	BRO1 domain and CAAX motif containing [Source:MGI Symbol;Acc:MGI:1918928]	Brox	37.2	38.7	39.4	39.3	41.5	39.3		38.4333	40.0333		0.0747262	0.23481	0.771415		Q8K2Q7	BRO1 domain-containing protein BROX	BROX_MOUSE	Brox	22701	22878	25393	19041	22865	20387		23657.3	20764.3		-0.190416	0.0528776	0.109641
	ENSMUSG00000001632	bromodomain and PHD finger containing, 1 [Source:MGI Symbol;Acc:MGI:1926033]	Brpf1	53.2	50.6	52.2	54.3	50.5	48		52	50.9333		-0.0473306	0.295106	0.58475		B2RRD7	Peregrin	BRPF1_MOUSE	Brpf1	564	475	440	374	421	416		493	403.667		-0.282561	0.0355322	0.0541184
	ENSMUSG00000022914	bromodomain and WD repeat domain containing 1 [Source:MGI Symbol;Acc:MGI:1890651]	Brwd1	8.7	7.3	7.9	7.2	7	6.6		7.96667	6.93333		-0.199304	0.0485325	2.08839		Q921C3;Q921C3-2	Bromodomain and WD repeat-containing protein 1;Isoform B of Bromodomain and WD repeat-containing protein 1	BRWD1_MOUSE	Brwd1	130	76	50	67	51	52		85.3333	56.6667		-0.491732	0.0814982	0.208573
	ENSMUSG00000071657	Berardinelli-Seip congenital lipodystrophy 2 (seipin) [Source:MGI Symbol;Acc:MGI:1298392]	Bscl2	26.9	24.9	25	24	24	22.1		25.6	23.3667		-0.113435	0.149775	1.15765		Q9Z2E9	Seipin	BSCL2_MOUSE	Bscl2	1366487	175409	1117267	266133	635656	281488		886388	394426		-0.830519	0.121688	0.362216
	ENSMUSG00000040859	BSD domain containing 1 [Source:MGI Symbol;Acc:MGI:1913466]	Bsdc1	13.3	14.8	13.6	12.9	12.5	12.9		13.9	12.7667		-0.105802	0.245138	0.737413		Q80Y55	BSD domain-containing protein 1	BSDC1_MOUSE	Bsdc1	71	489	582	694	581	1035		380.667	770		1.4561	0.0579848	0.127567
	ENSMUSG00000023175	basigin [Source:MGI Symbol;Acc:MGI:88208]	Bsg	539.2	589	560.8	497.4	551.1	535.9		563	528.133		-0.0446334	0.399155	0.32536		P18572;P18572-2	Basigin;Isoform 2 of Basigin	BASI_MOUSE	Bsg	111869	133676	128551	75514	102087	101774		124699	93125		-0.430969	0.0287948	0.0283863
	ENSMUSG00000028392	B-box and SPRY domain containing [Source:MGI Symbol;Acc:MGI:2177191]	Bspry	61.6	63.2	60.6	46.5	52.8	57.6		61.8	52.3		-0.163099	0.133602	1.25359		Q80YW5;Q80YW5-2	B box and SPRY domain-containing protein;Isoform 2 of B box and SPRY domain-containing protein	BSPRY_MOUSE	Bspry	2212	2501	2213	1728	1672	1752		2308.67	1717.33		-0.424726	0.0279451	0.00236792
	ENSMUSG00000046718	bone marrow stromal cell antigen 2 [Source:MGI Symbol;Acc:MGI:1916800]	Bst2	197	223.1	217.5	224.3	232	224.2		212.533	226.833		0.106442	0.165998	1.06984		Q8R2Q8	Bone marrow stromal antigen 2	BST2_MOUSE	Bst2	8866	9583	8828	6012	8158	7479		9092.33	7216.33		-0.34398	0.0309394	0.0386191
	ENSMUSG00000040565	B-TFIID TATA-box binding protein associated factor 1 [Source:MGI Symbol;Acc:MGI:2147538]	Btaf1	42.3	38.8	40.2	49	38.9	45.6		40.4333	44.5		0.0948978	0.224558	0.80519		E9QAE3	B-TFIID TATA-box-binding protein-associated factor 1	E9QAE3_MOUSE	Btaf1	11535	10385	9766	7653	8771	8462		10562	8295.33		-0.347459	0.0279451	0.0135938
	ENSMUSG00000025103	BTB (POZ) domain containing 1 [Source:MGI Symbol;Acc:MGI:1933765]	Btbd1	59.9	58.5	59.1	54.7	61.2	59		59.1667	58.3		0.0276338	0.432427	0.251369		P58544	BTB/POZ domain-containing protein 1	BTBD1_MOUSE	Btbd1	3428	3190	3353	3182	2956	3288		3323.67	3142		-0.0818619	0.118172	0.349358
	ENSMUSG00000021900	biotinidase [Source:MGI Symbol;Acc:MGI:1347001]	Btd	24.2	23.6	24.5	22	25.3	22.9		24.1	23.4		-0.00539904	0.546246	0.0263967		Q8CIF4	Biotinidase	BTD_MOUSE	Btd	2260	2037	2382	1716	2134	1801		2226.33	1883.67		-0.244511	0.0436909	0.0803275
	ENSMUSG00000021660	basic transcription factor 3 [Source:MGI Symbol;Acc:MGI:1202875]	Btf3	700.4	740.3	706.9	681.2	736.2	730.7		715.867	716.033		0.0467191	0.380081	0.367081		Q64152	Transcription factor BTF3	BTF3_MOUSE	Btf3	450285	449388	466549	362441	455908	484682		455407	434344		-0.0791004	0.167178	0.549928
	ENSMUSG00000028568	basic transcription factor 3-like 4 [Source:MGI Symbol;Acc:MGI:1915312]	Btf3l4	8.8	9.2	9.1	9.1	8.7	9		9.03333	8.93333		-0.0112207	0.534071	0.0506065		Q9CQH7	Transcription factor BTF3 homolog 4	BT3L4_MOUSE	Btf3l4	34289	30964	42258	39464	40788	28657		35837	36303		0.0133358	0.253029	0.944543
	ENSMUSG00000027379	BUB1, mitotic checkpoint serine/threonine kinase [Source:MGI Symbol;Acc:MGI:1100510]	Bub1	85.9	83.3	91.3	99.6	93.5	90.4		86.8333	94.5		0.0900039	0.156133	1.11876		O08901	Mitotic checkpoint serine/threonine-protein kinase BUB1	BUB1_MOUSE	Bub1	937	799	820	973	1033	1019		852	1008.33		0.246141	0.0301041	0.0359422
	ENSMUSG00000040084	BUB1B, mitotic checkpoint serine/threonine kinase [Source:MGI Symbol;Acc:MGI:1333889]	Bub1b	111.2	104.1	122.8	153.1	123.6	120		112.7	132.233		0.126691	0.129992	1.27565		Q9Z1S0	Mitotic checkpoint serine/threonine-protein kinase BUB1 beta	BUB1B_MOUSE	Bub1b	7620	7675	6980	7097	7303	7009		7425	7136.33		-0.0560925	0.154707	0.496172
	ENSMUSG00000066979	BUB3 mitotic checkpoint protein [Source:MGI Symbol;Acc:MGI:1343463]	Bub3	110.5	114.5	114.4	122	116.6	113.8		113.133	117.467		0.0462371	0.302413	0.56516		Q9WVA3	Mitotic checkpoint protein BUB3	BUB3_MOUSE	Bub3	218275	233122	243321	214483	220870	209249		231573	214867		-0.106937	0.0859082	0.224192
	ENSMUSG00000032077	BUD13 homolog [Source:MGI Symbol;Acc:MGI:2443443]	Bud13	20.4	22.1	21.9	24.2	21.6	21.9		21.4667	22.5667		0.0385063	0.414793	0.291788		Q8R149;Q8R149-2	BUD13 homolog;Isoform 2 of BUD13 homolog	BUD13_MOUSE	Bud13	1535	1610	1907	1609	1745	1657		1684	1670.33		-0.00621307	0.255093	0.955322
	ENSMUSG00000005378	BUD23, rRNA methyltransferase and ribosome maturation factor [Source:MGI Symbol;Acc:MGI:1913388]	Bud23	55.2	56.9	59.2	54.2	56.4	54.9		57.1	55.1667		-0.0404505	0.40621	0.309743		Q9CY21	Probable 18S rRNA (guanine-N(7))-methyltransferase	BUD23_MOUSE	Bud23	18825	17811	18791	14984	17548	17017		18475.7	16516.3		-0.164585	0.0555937	0.119353
	ENSMUSG00000038722	BUD31 homolog [Source:MGI Symbol;Acc:MGI:2141291]	Bud31	224.8	229.8	225.3	198.8	224.6	226.2		226.633	216.533		-0.00579683	0.543687	0.0316577		Q6PGH1	Protein BUD31 homolog	BUD31_MOUSE	Bud31	202520	177144	165998	121918	139224	151069		181887	137404		-0.405209	0.0279451	0.015656
	ENSMUSG00000023988	bystin-like [Source:MGI Symbol;Acc:MGI:1858419]	Bysl	77.6	84.3	82.7	79.1	78.1	80.1		81.5333	79.1		-0.034172	0.436488	0.242829		O54825	Bystin	BYST_MOUSE	Bysl	81150	74278	74598	58560	66538	65163		76675.3	63420.3		-0.274839	0.0279451	0.0210413
	ENSMUSG00000051223	basic leucine zipper and W2 domains 1 [Source:MGI Symbol;Acc:MGI:1914132]	Bzw1	533.8	552.4	545.5	575.6	562.5	571.7		543.9	569.933		0.077018	0.199387	0.90869		Q9CQC6	Basic leucine zipper and W2 domain-containing protein 1	BZW1_MOUSE	Bzw1	266113	261838	284976	208959	238869	234156		270976	227328		-0.254881	0.0287665	0.0282846
	ENSMUSG00000020547	basic leucine zipper and W2 domains 2 [Source:MGI Symbol;Acc:MGI:1914162]	Bzw2	84.6	84.3	91	105.9	92.5	94		86.6333	97.4667		0.118769	0.0809495	1.67278		Q91VK1	Basic leucine zipper and W2 domain-containing protein 2	BZW2_MOUSE	Bzw2	146340	163791	86494	116254	87132	134068		132208	112485		-0.203444	0.155845	0.501102
	ENSMUSG00000000581	C1D nuclear receptor co-repressor [Source:MGI Symbol;Acc:MGI:1927354]	C1d	50	50.8	50	51.7	53.4	53.5		50.2667	52.8667		0.103013	0.153409	1.1372		O35473	Nuclear nucleic acid-binding protein C1D	C1D_MOUSE	C1d	2208	2981	1320	1131	1579	1945		2169.67	1551.67		-0.440898	0.0915929	0.246808
	ENSMUSG00000042460	core 1 synthase, glycoprotein-N-acetylgalactosamine 3-beta-galactosyltransferase, 1 [Source:MGI Symbol;Acc:MGI:2151071]	C1galt1	63.7	59.6	61.6	56	57.4	58.7		61.6333	57.3667		-0.0735962	0.199129	0.911225		Q9JJ06	Glycoprotein-N-acetylgalactosamine 3-beta-galactosyltransferase 1	C1GLT_MOUSE	C1galt1	4536	5108	4906	3293	4010	4118		4850	3807		-0.354593	0.0279451	0.0212977
	ENSMUSG00000048970	C1GALT1-specific chaperone 1 [Source:MGI Symbol;Acc:MGI:1913493]	C1galt1c1	33.9	30.6	34.2	33.1	31.8	31.5		32.9	32.1333		-0.0505967	0.410443	0.301922		Q9JMG2	C1GALT1-specific chaperone 1	C1GLC_MOUSE	C1galt1c1	5250	5093	3606	2796	3612	3766		4649.67	3391.33		-0.447346	0.0369643	0.058567
	ENSMUSG00000018446	complement component 1, q subcomponent binding protein [Source:MGI Symbol;Acc:MGI:1194505]	C1qbp	253.6	267.7	274.6	273	282.2	267.5		265.3	274.233		0.0529264	0.305464	0.556631		O35658	Complement component 1 Q subcomponent-binding protein, mitochondrial	C1QBP_MOUSE	C1qbp	226190	241083	244457	216978	229367	218545		237243	221630		-0.0978363	0.0907396	0.24326
	ENSMUSG00000032120	C2 calcium-dependent domain containing 2-like [Source:MGI Symbol;Acc:MGI:1919014]	C2cd2l	19.6	20.2	19.7	20.3	18.8	16.2		19.8333	18.4333		-0.140004	0.0851084	1.63174		Q80X80	Phospholipid transfer protein C2CD2L	C2C2L_MOUSE	C2cd2l	371	336	243	177	214	240		316.667	210.333		-0.578814	0.0283715	0.0253501
	ENSMUSG00000030279	C2 calcium-dependent domain containing 5 [Source:MGI Symbol;Acc:MGI:1921991]	C2cd5	17.9	17.1	19	21.9	18.5	18		18	19.4667		0.0373107	0.385571	0.353872		Q7TPS5	C2 domain-containing protein 5	C2CD5_MOUSE	C2cd5	2245	1997	1641	1445	1636	2024		1961	1701.67		-0.206891	0.0987424	0.27472
	ENSMUSG00000027562	carbonic anhydrase 2 [Source:MGI Symbol;Acc:MGI:88269]	Car2	13.4	21.2	18.6	1.6	6.3	8.2		17.7333	5.36667		-1.51438	0.00229423	4.66408		P00920	Carbonic anhydrase 2	CAH2_MOUSE	Ca2	8484	4926	8787	6778	9043	7821		7399	7880.67		0.128161	0.185234	0.627962
	ENSMUSG00000028578	caspase activity and apoptosis inhibitor 1 [Source:MGI Symbol;Acc:MGI:1915020]	Caap1	15.2	16.2	15	16.7	15.3	15.8		15.4667	15.9333		0.0524864	0.381658	0.36357		Q8VDY9	Caspase activity and apoptosis inhibitor 1	CAAP1_MOUSE	Caap1	941	849	1048	822	1033	858		946	904.333		-0.0668806	0.183557	0.621171
	ENSMUSG00000036707	calcium binding protein 39 [Source:MGI Symbol;Acc:MGI:107438]	Cab39	162.1	151.2	158.7	156.5	154	152.5		157.333	154.333		-0.020307	0.436029	0.244007		Q06138	Calcium-binding protein 39	CAB39_MOUSE	Cab39	108622	102460	108875	79499	86913	92072		106652	86161.3		-0.309854	0.0279451	0.012024
	ENSMUSG00000021981	calcium binding protein 39-like [Source:MGI Symbol;Acc:MGI:1914081]	Cab39l	20.3	21.7	20.3	21.4	20.2	20.4		20.7667	20.6667		0.00687586	0.535173	0.0478133		Q9DB16	Calcium-binding protein 39-like	CB39L_MOUSE	Cab39l	60154	64815	57002	48235	52725	40968		60657	47309.3		-0.364312	0.0279451	0.0218671
	ENSMUSG00000034889	cactin, spliceosome C complex subunit [Source:MGI Symbol;Acc:MGI:1917562]	Cactin	88.8	92.5	100.1	102.9	93	87.8		93.8	94.5667		-0.0463187	0.358855	0.418698		Q9CS00	Cactin	CATIN_MOUSE	Cactin	8502	9568	9406	4191	5159	10248		9158.67	6532.67		-0.595982	0.0557894	0.119895
	ENSMUSG00000033417	CDK2 associated, cullin domain 1 [Source:MGI Symbol;Acc:MGI:1926082]	Cacul1	37.1	36.4	38.2	39.4	41	37		37.2333	39.1333		0.076321	0.168604	1.05854		Q8R0X2	CDK2-associated and cullin domain-containing protein 1	CACL1_MOUSE	Cacul1	4862	4934	5531	3951	5174	4621		5109	4582		-0.163382	0.0886519	0.235096
	ENSMUSG00000014226	calcyclin binding protein [Source:MGI Symbol;Acc:MGI:1270839]	Cacybp	217.8	211	222.5	235.1	230.9	228		217.1	231.333		0.0901468	0.152124	1.14531		Q9CXW3	Calcyclin-binding protein	CYBP_MOUSE	Cacybp	1365662	1306400	790677	432783	987094	1191873		1.15425e+06	870583		-0.490051	0.103867	0.294552
	ENSMUSG00000013629	carbamoyl-phosphate synthetase 2, aspartate transcarbamylase, and dihydroorotase [Source:MGI Symbol;Acc:MGI:1916969]	Cad	152.9	142.1	164.1	170.1	143.9	145.4		153.033	153.133		-0.0694455	0.281949	0.623184		B2RQC6	CAD protein	PYR1_MOUSE	Cad	214501	202169	192147	161847	184367	177218		202939	174477		-0.218673	0.0342037	0.049997
	ENSMUSG00000033033	calcium homeostasis modulator family member 2 [Source:MGI Symbol;Acc:MGI:1919941]	Calhm2	7.5	7.1	7	9.3	6.9	6.9		7.2	7.7		0.0156316	0.524533	0.0693134		Q8VEC4	Calcium homeostasis modulator protein 2	CAHM2_MOUSE	Calhm2	0	1644	156	209	601	803		600	537.667		-0.121586	0.247939	0.919928
	ENSMUSG00000046031	calcium homeostasis modulator family member 6 [Source:MGI Symbol;Acc:MGI:2443082]	Calhm6	27.2	36.5	37.6	48.7	43.3	41.4		33.7667	44.4667		0.309867	0.0882406	1.6014		Q8C9E8	Calcium homeostasis modulator protein 6	CAHM6_MOUSE	Calhm6	8628	7604	2307	2724	8151	2275		6179.67	4383.33		-0.527744	0.148631	0.471557
	ENSMUSG00000001175	calmodulin 1 [Source:MGI Symbol;Acc:MGI:88251]	Calm1	708.4	747	740	741.6	767.9	751.7		731.8	753.733		0.0629427	0.311779	0.537374		P0DP26;P0DP27;P0DP28	Calmodulin-1;Calmodulin-2;Calmodulin-3	CALM1_MOUSE;CALM2_MOUSE;CALM3_MOUSE	Calm1;Calm2;Calm3	202578	255790	271935	193515	234518	142658		243434	190230		-0.373998	0.0580912	0.128056
	ENSMUSG00000003814	calreticulin [Source:MGI Symbol;Acc:MGI:88252]	Calr	1288.8	1407.8	1359.2	1077.1	1278.1	1231.9		1351.93	1195.7		-0.113897	0.166411	1.06854		P14211	Calreticulin	CALR_MOUSE	Calr	1996332	2120209	1993130	1266678	1642660	1606463		2036557	1505267		-0.445207	0.0279451	0.0105004
	ENSMUSG00000029767	calumenin [Source:MGI Symbol;Acc:MGI:1097158]	Calu	157.1	164.6	162	143.2	155.8	154		161.233	151		-0.0543821	0.300345	0.570919		O35887	Calumenin	CALU_MOUSE	Calu	78192	82060	98079	73800	80310	76848		86110.3	76986		-0.155479	0.0803203	0.204726
	ENSMUSG00000039145	calcium/calmodulin-dependent protein kinase ID [Source:MGI Symbol;Acc:MGI:2442190]	Camk1d	11.1	9.7	10.7	15.9	12.9	12		10.5	13.6		0.286434	0.011552	3.24023		Q8BW96;Q8BW96-2	Calcium/calmodulin-dependent protein kinase type 1D;Isoform 2 of Calcium/calmodulin-dependent protein kinase type 1D	KCC1D_MOUSE	Camk1d	2644	3859	4190	3742	4500	3913		3564.33	4051.67		0.208037	0.110341	0.319792
	ENSMUSG00000053819	calcium/calmodulin-dependent protein kinase II, delta [Source:MGI Symbol;Acc:MGI:1341265]	Camk2d	3	2.5	2.7	3.9	3	3.2		2.73333	3.36667		0.252175	0.0405096	2.24461		Q6PHZ2	Calcium/calmodulin-dependent protein kinase type II subunit delta	KCC2D_MOUSE	Camk2d	5416	6513	6983	6735	5627	5436		6304	5932.67		-0.0859359	0.16769	0.552344
	ENSMUSG00000021820	calcium/calmodulin-dependent protein kinase II gamma [Source:MGI Symbol;Acc:MGI:88259]	Camk2g	52.5	47.3	51.6	51.1	47	45.4		50.4667	47.8333		-0.102546	0.0916917	1.57292		Q923T9;Q923T9-2	Calcium/calmodulin-dependent protein kinase type II subunit gamma;Isoform 2 of Calcium/calmodulin-dependent protein kinase type II subunit gamma	KCC2G_MOUSE	Camk2g	25065	24483	26332	21633	23734	23455		25293.3	22940.7		-0.141396	0.0575025	0.125687
	ENSMUSG00000038128	calcium/calmodulin-dependent protein kinase IV [Source:MGI Symbol;Acc:MGI:88258]	Camk4	79.2	78.2	83	77.3	84.1	75.5		80.1333	78.9667		-0.00865172	0.529418	0.0597967		P08414	Calcium/calmodulin-dependent protein kinase type IV	KCC4_MOUSE	Camk4	34529	34546	35415	27267	30945	29269		34830	29160.3		-0.258151	0.0279451	0.0184015
	ENSMUSG00000020114	cullin associated and neddylation disassociated 1 [Source:MGI Symbol;Acc:MGI:1261820]	Cand1	75.5	76.7	81.2	82.1	80.4	76.9		77.8	79.8		0.0217489	0.456402	0.201215		Q6ZQ38	Cullin-associated NEDD8-dissociated protein 1	CAND1_MOUSE	Cand1	178581	139280	156052	120972	125943	138328		157971	128414		-0.293685	0.0333453	0.0471048
	ENSMUSG00000030319	cullin-associated and neddylation-dissociated 2 (putative) [Source:MGI Symbol;Acc:MGI:1914338]	Cand2	4	3.3	4	4.7	3.7	3.5		3.76667	3.96667		-0.0332672	0.506549	0.102874		Q6ZQ73	Cullin-associated NEDD8-dissociated protein 2	CAND2_MOUSE	Cand2	886	684	568	517	598	453		712.667	522.667		-0.432458	0.0390204	0.0646418
	ENSMUSG00000020368	calnexin [Source:MGI Symbol;Acc:MGI:88261]	Canx	618.3	606.1	642.6	597.1	633.8	609.9		622.333	613.6		-0.00218428	0.55208	0.0168634		P35564	Calnexin	CALX_MOUSE	Canx	577554	532192	624441	435997	516232	545296		578062	499175		-0.21503	0.0548785	0.116766
	ENSMUSG00000028656	CAP, adenylate cyclase-associated protein 1 (yeast) [Source:MGI Symbol;Acc:MGI:88262]	Cap1	698.1	720.7	722.7	695.2	703.9	717.7		713.833	705.6		0.00120539	0.556219	0.0095242		P40124	Adenylyl cyclase-associated protein 1	CAP1_MOUSE	Cap1	1030860	1059852	1003138	774373	863727	849005		1.03128e+06	829035		-0.316213	0.0279451	0.00768859
	ENSMUSG00000056737	capping protein (actin filament), gelsolin-like [Source:MGI Symbol;Acc:MGI:1098259]	Capg	172.7	195.8	182.6	126.7	169.7	161.4		183.7	152.6		-0.16696	0.109006	1.41868		P24452	Macrophage-capping protein	CAPG_MOUSE	Capg	249032	256710	245381	142674	192184	205433		250374	180097		-0.492539	0.0279451	0.0164227
	ENSMUSG00000024942	calpain 1 [Source:MGI Symbol;Acc:MGI:88263]	Capn1	139.2	143.5	146.1	139.3	141.9	139.9		142.933	140.367		-0.0152683	0.488367	0.139829		O35350	Calpain-1 catalytic subunit	CAN1_MOUSE	Capn1	87498	89535	87501	73330	79300	77313		88178	76647.7		-0.202855	0.0292134	0.0320148
	ENSMUSG00000026509	calpain 2 [Source:MGI Symbol;Acc:MGI:88264]	Capn2	308.2	307.9	315.9	208.6	267.4	269		310.667	248.333		-0.237637	0.0450328	2.15227		O08529	Calpain-2 catalytic subunit	CAN2_MOUSE	Capn2	223977	241773	250532	133058	178424	179748		238761	163743		-0.556219	0.0279451	0.00746025
	ENSMUSG00000021893	calpain 7 [Source:MGI Symbol;Acc:MGI:1338030]	Capn7	54	50.2	52.4	50.8	49.5	49.3		52.2	49.8667		-0.0574997	0.268696	0.662325		Q9R1S8	Calpain-7	CAN7_MOUSE	Capn7	1992	1706	1174	1106	1231	1019		1624	1118.67		-0.507977	0.034141	0.0498679
	ENSMUSG00000001794	calpain, small subunit 1 [Source:MGI Symbol;Acc:MGI:88266]	Capns1	319	340.5	330.3	316	327.3	322.3		329.933	321.867		-0.0101515	0.51456	0.0875876		O88456	Calpain small subunit 1	CPNS1_MOUSE	Capns1	247912	270604	294170	169674	243781	202037		270895	205164		-0.41323	0.0299263	0.0349213
	ENSMUSG00000027184	cell cycle associated protein 1 [Source:MGI Symbol;Acc:MGI:1858234]	Caprin1	229.4	234.3	235.5	250.9	237.4	236		233.067	241.433		0.0425961	0.285887	0.611032		Q60865	Caprin-1	CAPR1_MOUSE	Caprin1	114521	104697	122284	91055	101826	100117		113834	97666		-0.219822	0.0374871	0.0598282
	ENSMUSG00000070372	capping protein (actin filament) muscle Z-line, alpha 1 [Source:MGI Symbol;Acc:MGI:106227]	Capza1	240.4	251.4	248.3	237.5	247.4	248.2		246.7	244.367		0.0142289	0.499267	0.119377		P47753	F-actin-capping protein subunit alpha-1	CAZA1_MOUSE	Capza1	837143	730062	838636	607921	702324	728898		801947	679714		-0.239933	0.0401517	0.068499
	ENSMUSG00000015733	capping protein (actin filament) muscle Z-line, alpha 2 [Source:MGI Symbol;Acc:MGI:106222]	Capza2	212.5	222.1	222.3	208.8	225.7	221		218.967	218.5		0.0296468	0.42362	0.272084		P47754	F-actin-capping protein subunit alpha-2	CAZA2_MOUSE	Capza2	383155	382048	407481	285495	344574	344089		390895	324719		-0.272451	0.0308361	0.0379734
	ENSMUSG00000028745	capping protein (actin filament) muscle Z-line, beta [Source:MGI Symbol;Acc:MGI:104652]	Capzb	615.5	640.5	647.3	601.7	622.1	617		634.433	613.6		-0.0303021	0.427216	0.26375		P47757-2	Isoform 2 of F-actin-capping protein subunit beta	CAPZB_MOUSE	Capzb	1156982	1167294	1225599	917329	1054713	996534		1.18329e+06	989525		-0.25989	0.0280014	0.0224054
	ENSMUSG00000036526	caspase recruitment domain family, member 11 [Source:MGI Symbol;Acc:MGI:1916978]	Card11	80.8	84.2	89.3	82.7	77.8	79.9		84.7667	80.1333		-0.104768	0.127452	1.2914		Q8CIS0;Q8CIS0-2	Caspase recruitment domain-containing protein 11;Isoform 2 of Caspase recruitment domain-containing protein 11	CAR11_MOUSE	Card11	12835	12131	11763	9087	10653	10984		12243	10241.3		-0.2615	0.0317692	0.0414622
	ENSMUSG00000037960	caspase recruitment domain family, member 19 [Source:MGI Symbol;Acc:MGI:1915730]	Card19	51	57.7	60.2	51.6	47.6	49.9		56.3	49.7		-0.218185	0.0644546	1.85655		Q9D1I2	Caspase recruitment domain-containing protein 19	CAR19_MOUSE	Card19	2157	1476	1439	1028	1352	1226		1690.67	1202		-0.47563	0.0339089	0.0490832
	ENSMUSG00000041849	caspase recruitment domain family, member 6 [Source:MGI Symbol;Acc:MGI:3032959]	Card6	13.4	11.4	12.8	18.9	15.3	15.3		12.5333	16.5		0.326861	0.00863016	3.48195		E9PWH2	Caspase recruitment domain family, member 6	E9PWH2_MOUSE	Card6	24	17	32	30	49	48		24.3333	42.3333		0.811379	0.0294706	0.0332329
	ENSMUSG00000008393	calcium regulated heat stable protein 1 [Source:MGI Symbol;Acc:MGI:1196368]	Carhsp1	39.1	45.1	42.6	41.5	46.8	44.6		42.2667	44.3		0.113983	0.15376	1.13509		Q9CR86	Calcium-regulated heat stable protein 1	CHSP1_MOUSE	Carhsp1	20268	17951	13931	10774	11660	12525		17383.3	11653		-0.562545	0.0279451	0.0111319
	ENSMUSG00000032185	coactivator-associated arginine methyltransferase 1 [Source:MGI Symbol;Acc:MGI:1913208]	Carm1	71	67.8	73	84	70.6	67.2		70.6	73.9333		-0.00462026	0.541458	0.0361732		Q9WVG6;Q9WVG6-2	Histone-arginine methyltransferase CARM1;Isoform 2 of Histone-arginine methyltransferase CARM1	CARM1_MOUSE	Carm1	20837	21596	21044	20845	20241	19735		21159	20273.7		-0.0618607	0.134916	0.41541
	ENSMUSG00000050357	capping protein regulator and myosin 1 linker 2 [Source:MGI Symbol;Acc:MGI:2685431]	Carmil2	40.1	38.4	38.8	60.6	41.7	37.9		39.1	46.7333		0.106249	0.254358	0.707179		Q3V3V9	Capping protein, Arp2/3 and myosin-I linker protein 2	CARL2_MOUSE	Carmil2	6773	5658	4730	4839	4650	4852		5720.33	4780.33		-0.243803	0.0596769	0.133349
	ENSMUSG00000024726	carnosine N-methyltransferase 1 [Source:MGI Symbol;Acc:MGI:1914633]	Carnmt1	11.2	8.9	10.5	10.5	10.4	10.1		10.2	10.3333		0.017875	0.517225	0.0833863		Q80UY1	Carnosine N-methyltransferase	CARME_MOUSE	Carnmt1	13052	13214	12885	10289	10283	12141		13050.3	10904.3		-0.263593	0.0290068	0.0310121
	ENSMUSG00000010755	cysteinyl-tRNA synthetase [Source:MGI Symbol;Acc:MGI:1351477]	Cars	54.3	54.7	51.8	39.2	49.7	47		53.6	45.3		-0.143835	0.103423	1.46457		Q9ER72;Q9ER72-2	Cysteine--tRNA ligase, cytoplasmic;Isoform 2 of Cysteine--tRNA ligase, cytoplasmic	SYCC_MOUSE	Cars1	58959	60830	65015	34734	50053	49727		61601.3	44838		-0.477144	0.0283715	0.0253122
	ENSMUSG00000056228	cysteinyl-tRNA synthetase 2 (mitochondrial)(putative) [Source:MGI Symbol;Acc:MGI:1919191]	Cars2	8.5	8.8	9.7	11.2	8.7	8.1		9	9.33333		-0.0810285	0.345242	0.45138		Q8BYM8	Probable cysteine--tRNA ligase, mitochondrial	SYCM_MOUSE	Cars2	2028	1961	767	1315	1298	1373		1585.33	1328.67		-0.126754	0.213094	0.751654
	ENSMUSG00000078676	cancer susceptibility candidate 3 [Source:MGI Symbol;Acc:MGI:2179723]	Casc3	88.3	88.1	83.7	93.9	87.4	83.1		86.7	88.1333		0.0231912	0.447231	0.219728		Q8K3W3	Protein CASC3	CASC3_MOUSE	Casc3	1189	1147	1476	1398	1305	1125		1270.67	1276		0.00934411	0.253684	0.947962
	ENSMUSG00000025888	caspase 1 [Source:MGI Symbol;Acc:MGI:96544]	Casp1	16.5	15.3	13.9	15.4	14.3	15.1		15.2333	14.9333		0.0256999	0.502839	0.11068		P29452	Caspase-1	CASP1_MOUSE	Casp1	12484	11948	10732	9242	10369	9868		11721.3	9826.33		-0.253128	0.0301423	0.0361364
	ENSMUSG00000029863	caspase 2 [Source:MGI Symbol;Acc:MGI:97295]	Casp2	37.9	34.7	37.9	58.1	41.4	40.7		36.8333	46.7333		0.210006	0.0256646	2.60039		P29594	Caspase-2	CASP2_MOUSE	Casp2	6813	5988	6605	6208	6309	6692		6468.67	6403		-0.0133152	0.240026	0.881491
	ENSMUSG00000031628	caspase 3 [Source:MGI Symbol;Acc:MGI:107739]	Casp3	312.3	329.4	312.5	286.1	303.8	303.9		318.067	297.933		-0.0502774	0.320794	0.515624		P70677	Caspase-3	CASP3_MOUSE	Casp3	551974	344581	419667	275700	315901	312881		438741	301494		-0.516834	0.0288563	0.029758
	ENSMUSG00000027997	caspase 6 [Source:MGI Symbol;Acc:MGI:1312921]	Casp6	3.7	3.9	3.2	4.6	3.8	4.2		3.6	4.2		0.251194	0.111192	1.40493		O08738	Caspase-6	CASP6_MOUSE	Casp6	3313	2441	2673	2318	2488	2267		2809	2357.67		-0.241806	0.0538096	0.113321
	ENSMUSG00000025076	caspase 7 [Source:MGI Symbol;Acc:MGI:109383]	Casp7	19.6	19.1	21.1	29.2	23.4	23.8		19.9333	25.4667		0.261868	0.0135558	3.09842		P97864	Caspase-7	CASP7_MOUSE	Casp7	10478	9092	7473	6839	7451	6490		9014.33	6926.67		-0.368713	0.0316535	0.0408231
	ENSMUSG00000026029	caspase 8 [Source:MGI Symbol;Acc:MGI:1261423]	Casp8	195.9	195	199.6	184.1	191.8	180.1		196.833	185.333		-0.0712114	0.179865	1.00125		O89110	Caspase-8	CASP8_MOUSE	Casp8	138465	128259	131083	99050	111841	104717		132602	105203		-0.334963	0.0279451	0.00698412
	ENSMUSG00000028282	caspase 8 associated protein 2 [Source:MGI Symbol;Acc:MGI:1349399]	Casp8ap2	53	49.4	56.3	62.6	55.5	53.6		52.9	57.2333		0.0547268	0.313844	0.532186		Q9WUF3	CASP8-associated protein 2	C8AP2_MOUSE	Casp8ap2	616	653	644	416	549	564		637.667	509.667		-0.335996	0.0333117	0.0468354
	ENSMUSG00000028914	caspase 9 [Source:MGI Symbol;Acc:MGI:1277950]	Casp9	12.7	13.3	12.6	10.7	10.6	10.8		12.8667	10.7		-0.235583	0.0304269	2.46835		Q8C3Q9	Caspase-9	CASP9_MOUSE	Casp9	3328	2016	2007	1625	1865	2361		2450.33	1950.33		-0.304059	0.0954073	0.261992
	ENSMUSG00000021585	calpastatin [Source:MGI Symbol;Acc:MGI:1098236]	Cast	58.5	55.6	57.3	56.1	56	55.1		57.1333	55.7333		-0.0225247	0.439631	0.235983		P51125;P51125-2;P51125-3	Calpastatin;Isoform 2 of Calpastatin;Isoform 3 of Calpastatin	ICAL_MOUSE	Cast	40620	41625	41446	29185	35259	34334		41230.3	32926		-0.329339	0.0279451	0.0147455
	ENSMUSG00000027187	catalase [Source:MGI Symbol;Acc:MGI:88271]	Cat	100.9	106.1	112.3	120.1	113.5	112.7		106.433	115.433		0.0881947	0.168783	1.05706		P24270	Catalase	CATA_MOUSE	Cat	93313	103173	108008	88083	96602	93159		101498	92614.7		-0.130509	0.0781317	0.197265
	ENSMUSG00000034342	Casitas B-lineage lymphoma [Source:MGI Symbol;Acc:MGI:88279]	Cbl	79.6	74.2	78.6	78.9	74.2	69.4		77.4667	74.1667		-0.0828854	0.137299	1.22751		P22682	E3 ubiquitin-protein ligase CBL	CBL_MOUSE	Cbl	35730	36451	37584	30454	34121	34184		36588.3	32919.7		-0.1542	0.0532694	0.111446
	ENSMUSG00000022637	Casitas B-lineage lymphoma b [Source:MGI Symbol;Acc:MGI:2146430]	Cblb	46.5	47	48.3	42.9	41.6	40.1		47.2667	41.5333		-0.196348	0.0474207	2.1094		Q3TTA7	E3 ubiquitin-protein ligase CBL-B	CBLB_MOUSE	Cblb	30000	30843	31113	18987	23555	23654		30652	22065.3		-0.481431	0.0279451	0.00462845
	ENSMUSG00000020659	Casitas B-lineage lymphoma-like 1 [Source:MGI Symbol;Acc:MGI:2144842]	Cbll1	31.7	32.5	29.9	36.7	30.2	31.5		31.3667	32.8		0.0408055	0.41381	0.293883		Q9JIY2	E3 ubiquitin-protein ligase Hakai	HAKAI_MOUSE	Cbll1	3072	3309	4306	3618	3830	3805		3562.33	3751		0.0895038	0.16624	0.545909
	ENSMUSG00000051483	carbonyl reductase 1 [Source:MGI Symbol;Acc:MGI:88284]	Cbr1	14.5	15.6	14.5	10.5	13	13.1		14.8667	12.2		-0.179102	0.182226	0.989284		P48758	Carbonyl reductase [NADPH] 1	CBR1_MOUSE	Cbr1	73212	70205	66218	43204	59074	58799		69878.3	53692.3		-0.393799	0.0295943	0.0336802
	ENSMUSG00000031641	carbonyl reductase 4 [Source:MGI Symbol;Acc:MGI:2384567]	Cbr4	4.5	3.5	4.3	4	3.6	3.6		4.1	3.73333		-0.179401	0.161068	1.09367		Q91VT4	Carbonyl reductase family member 4	CBR4_MOUSE	Cbr4	9279	9323	8982	7977	9212	8977		9194.67	8722		-0.0787354	0.130257	0.395999
	ENSMUSG00000024878	COBW domain containing 1 [Source:MGI Symbol;Acc:MGI:2385089]	Cbwd1	31.8	30.9	30.6	23.9	28.4	30.1		31.1	27.4667		-0.089917	0.269965	0.658297		Q8VEH6	COBW domain-containing protein 1	CBWD1_MOUSE	Cbwd1	30521	25205	24023	19830	27286	26400		26583	24505.3		-0.123848	0.149115	0.473625
	ENSMUSG00000018666	chromobox 1 [Source:MGI Symbol;Acc:MGI:105369]	Cbx1	67.5	63.2	67.6	74.4	66.5	68.2		66.1	69.7		0.0471974	0.310943	0.541208		P83917	Chromobox protein homolog 1	CBX1_MOUSE	Cbx1	43596	57234	46049	48809	41223	42272		48959.7	44101.3		-0.144646	0.11095	0.322172
	ENSMUSG00000029836	chromobox 3 [Source:MGI Symbol;Acc:MGI:108515]	Cbx3	43.6	44	46.6	58	47.9	48.6		44.7333	51.5		0.132915	0.0666823	1.8274		P23198	Chromobox protein homolog 3	CBX3_MOUSE	Cbx3	790817	780806	767545	810290	783640	775360		779723	789763		0.0183121	0.223514	0.801279
	ENSMUSG00000039989	chromobox 4 [Source:MGI Symbol;Acc:MGI:1195985]	Cbx4	45.6	45.1	48.8	52.3	48.1	44.1		46.5	48.1667		0.00155826	0.556172	0.00986332		O55187	E3 SUMO-protein ligase CBX4	CBX4_MOUSE	Cbx4	6199	5948	6104	5634	5753	5428		6083.67	5605		-0.118433	0.0643816	0.148436
	ENSMUSG00000009575	chromobox 5 [Source:MGI Symbol;Acc:MGI:109372]	Cbx5	120.2	100.3	115.4	140.4	109.5	113.9		111.967	121.267		0.0365313	0.436348	0.243054		Q61686	Chromobox protein homolog 5	CBX5_MOUSE	Cbx5	155523	156024	180614	169998	170537	162443		164054	167659		0.0345768	0.205196	0.7162
	ENSMUSG00000025578	chromobox 8 [Source:MGI Symbol;Acc:MGI:1353589]	Cbx8	8.1	8	9.1	9.4	8.9	8.7		8.4	9		0.0495019	0.43036	0.257131		Q9QXV1	Chromobox protein homolog 8	CBX8_MOUSE	Cbx8	1423	2334	1873	1649	1646	2302		1876.67	1865.67		0.00211748	0.262385	0.992777
	ENSMUSG00000036686	coiled-coil and C2 domain containing 1A [Source:MGI Symbol;Acc:MGI:2384831]	Cc2d1a	27.2	25	28.3	28.5	24.7	23.9		26.8333	25.7		-0.125999	0.122971	1.31985		Q8K1A6	Coiled-coil and C2 domain-containing protein 1A	C2D1A_MOUSE	Cc2d1a	7076	6844	6984	4244	5990	6108		6968	5447.33		-0.374382	0.0350317	0.0525887
	ENSMUSG00000028582	coiled-coil and C2 domain containing 1B [Source:MGI Symbol;Acc:MGI:2443076]	Cc2d1b	60.6	57.4	62.2	74.2	64.5	61.1		60.0667	66.6		0.0898655	0.136951	1.23104		Q8BRN9	Coiled-coil and C2 domain-containing protein 1B	C2D1B_MOUSE	Cc2d1b	19899	19504	19763	18412	18947	18185		19722	18514.7		-0.0913011	0.0882418	0.23352
	ENSMUSG00000020074	cell division cycle and apoptosis regulator 1 [Source:MGI Symbol;Acc:MGI:1914750]	Ccar1	61.9	55.9	58.6	56.2	55	54.3		58.8	55.1667		-0.0803676	0.180022	0.999722		Q8CH18	Cell division cycle and apoptosis regulator protein 1	CCAR1_MOUSE	Ccar1	25385	25441	26295	21765	23913	23709		25707	23129		-0.15356	0.04788	0.0933788
	ENSMUSG00000033712	cell cycle activator and apoptosis regulator 2 [Source:MGI Symbol;Acc:MGI:2444228]	Ccar2	120	120.9	120	104.6	104.1	103		120.3	103.9		-0.196354	0.00455425	3.94773		Q8VDP4	Cell cycle and apoptosis regulator protein 2	CCAR2_MOUSE	Ccar2	49195	47618	49323	40072	45665	46003		48712	43913.3		-0.152289	0.0583358	0.128723
	ENSMUSG00000063605	coiled-coil domain containing 102A [Source:MGI Symbol;Acc:MGI:2686927]	Ccdc102a	28.9	29.5	27.3	30.7	27.6	28.4		28.5667	28.9		0.0247342	0.500106	0.116771		Q3TMW1	Coiled-coil domain-containing protein 102A	C102A_MOUSE	Ccdc102a	822	1152	1057	779	930	793		1010.33	834		-0.266979	0.0588708	0.130284
	ENSMUSG00000042111	coiled-coil domain containing 115 [Source:MGI Symbol;Acc:MGI:1916918]	Ccdc115	75.7	76.7	71.3	65.7	76.2	72.2		74.5667	71.3667		0.0178002	0.505194	0.106305		Q8VE99	Coiled-coil domain-containing protein 115	CC115_MOUSE	Ccdc115	58522	41235	40696	29508	35548	37048		46817.7	34034.7		-0.445822	0.0328614	0.0447414
	ENSMUSG00000019659	coiled-coil domain containing 12 [Source:MGI Symbol;Acc:MGI:1919904]	Ccdc12	70.1	74.1	73.6	73.4	71.8	71.4		72.6	72.2		-0.00545645	0.540653	0.0378541		Q8R344	Coiled-coil domain-containing protein 12	CCD12_MOUSE	Ccdc12	32244	33407	31375	30893	30441	32210		32342	31181.3		-0.0526641	0.155298	0.498738
	ENSMUSG00000007721	coiled-coil domain containing 124 [Source:MGI Symbol;Acc:MGI:1916403]	Ccdc124	98.3	123.6	126.5	127.6	117.9	115.1		116.133	120.2		-0.00410671	0.552642	0.0158607		Q9D8X2	Coiled-coil domain-containing protein 124	CC124_MOUSE	Ccdc124	59954	56936	59005	43977	52236	51851		58631.7	49354.7		-0.252623	0.0310673	0.0390862
	ENSMUSG00000021578	coiled-coil domain containing 127 [Source:MGI Symbol;Acc:MGI:1914683]	Ccdc127	20.6	20.3	19.7	21.7	19.8	21.1		20.2	20.8667		0.0544957	0.297739	0.577941		Q3TC33	Coiled-coil domain-containing protein 127	CC127_MOUSE	Ccdc127	0	793	1343	1012	664	645		712	773.667		-0.447481	0.0833618	0.215218
	ENSMUSG00000068114	coiled-coil domain containing 134 [Source:MGI Symbol;Acc:MGI:1923707]	Ccdc134	26.2	22.2	24	20.9	19.1	18.6		24.1333	19.5333		-0.317563	0.0142594	3.05633		Q8C7V8;Q8C7V8-2	Coiled-coil domain-containing protein 134;Isoform 2 of Coiled-coil domain-containing protein 134	CC134_MOUSE	Ccdc134	24288	9573	26278	19345	21396	8012		20046.3	16251		-0.293869	0.179421	0.602851
	ENSMUSG00000049957	coiled-coil domain containing 137 [Source:MGI Symbol;Acc:MGI:1914541]	Ccdc137	28.7	25.6	27.7	30.3	26.1	24.7		27.3333	27.0333		-0.0664524	0.302982	0.563616		Q8R0K4	Coiled-coil domain-containing protein 137	CC137_MOUSE	Ccdc137	2816	2076	2929	2877	2859	2400		2607	2712		0.0684161	0.198373	0.685542
	ENSMUSG00000024018	coiled-coil domain containing 167 [Source:MGI Symbol;Acc:MGI:1915847]	Ccdc167	3.8	3.4	3.8	4.2	3.9	3.4		3.66667	3.83333		0.0249718	0.494682	0.128792		Q9D162;Q9D162-2;Q9D162-3	Coiled-coil domain-containing protein 167;Isoform 2 of Coiled-coil domain-containing protein 167;Isoform 3 of Coiled-coil domain-containing protein 167	CC167_MOUSE	Ccdc167	14229	12643	14468	10475	12430	11767		13780	11557.3		-0.254839	0.0334562	0.0478482
	ENSMUSG00000034083	coiled-coil domain containing 174 [Source:MGI Symbol;Acc:MGI:2444652]	Ccdc174	11.4	13	12	11.7	12.1	11.1		12.1333	11.6333		-0.0370411	0.432457	0.251249		Q3U155	Coiled-coil domain-containing protein 174	CC174_MOUSE	Ccdc174	839	843	933	847	842	711		871.667	800		-0.126683	0.0968938	0.267719
	ENSMUSG00000031143	coiled-coil domain containing 22 [Source:MGI Symbol;Acc:MGI:1859608]	Ccdc22	0.2	0.3	0.2	0.6	0.4	0.1		0.233333	0.366667		0.28366	0.423992	0.27131		Q9JIG7	Coiled-coil domain-containing protein 22	CCD22_MOUSE	Ccdc22	8762	7951	7656	6631	7916	6813		8123	7120		-0.192233	0.0547024	0.116271
	ENSMUSG00000022035	coiled-coil domain containing 25 [Source:MGI Symbol;Acc:MGI:1914429]	Ccdc25	55.1	51.2	53.2	49.9	50.8	50.5		53.1667	50.4		-0.0537068	0.303282	0.56256		Q78PG9	Coiled-coil domain-containing protein 25	CCD25_MOUSE	Ccdc25	32381	30625	31205	21747	27617	24941		31403.7	24768.3		-0.348914	0.0279451	0.0176017
	ENSMUSG00000020925	coiled-coil domain containing 43 [Source:MGI Symbol;Acc:MGI:1289318]	Ccdc43	54.7	47.7	51.2	45.9	48.8	51		51.2	48.5667		-0.0288914	0.446134	0.222344		Q9CR29	Coiled-coil domain-containing protein 43	CCD43_MOUSE	Ccdc43	7166	3540	4127	2853	2455	4475		4944.33	3261		-0.579973	0.0607013	0.136336
	ENSMUSG00000078622	coiled-coil domain containing 47 [Source:MGI Symbol;Acc:MGI:1914413]	Ccdc47	48.9	44	50.7	46.3	47.4	46.8		47.8667	46.8333		-0.0317995	0.433101	0.249909		Q9D024	Coiled-coil domain-containing protein 47	CCD47_MOUSE	Ccdc47	31813	33545	34959	25818	29212	27936		33439	27655.3		-0.274771	0.0279451	0.0185541
	ENSMUSG00000038127	coiled-coil domain containing 50 [Source:MGI Symbol;Acc:MGI:1914751]	Ccdc50	57.4	52.3	58.1	69.6	58.8	59.7		55.9333	62.7		0.106909	0.148064	1.1672		Q810U5;Q810U5-3	Coiled-coil domain-containing protein 50;Isoform 3 of Coiled-coil domain-containing protein 50	CCD50_MOUSE	Ccdc50	7604	7237	8729	7189	7723	7821		7856.67	7577.67		-0.0485537	0.188318	0.641821
	ENSMUSG00000025645	coiled-coil domain containing 51 [Source:MGI Symbol;Acc:MGI:1913908]	Ccdc51	24.7	24.9	27.1	26.5	22	27.7		25.5667	25.4		-0.0614215	0.422424	0.274764		Q3URS9;Q3URS9-2	Mitochondrial potassium channel;Isoform 2 of Mitochondrial potassium channel	MITOK_MOUSE	Ccdc51	4913	4891	5019	3886	4213	3808		4941	3969		-0.317322	0.0279451	0.0062077
	ENSMUSG00000075229	coiled-coil domain containing 58 [Source:MGI Symbol;Acc:MGI:2146423]	Ccdc58	74.1	75	74	62.2	67.4	68.2		74.3667	65.9333		-0.125465	0.10528	1.44903		Q8R3Q6	Coiled-coil domain-containing protein 58	CCD58_MOUSE	Ccdc58	40069	39580	47558	37515	41047	39019		42402.3	39193.7		-0.109342	0.111276	0.323484
	ENSMUSG00000048701	coiled-coil domain containing 6 [Source:MGI Symbol;Acc:MGI:1923801]	Ccdc6	54.6	49.5	52.2	51.5	48	47.5		52.1	49		-0.0962385	0.133165	1.25756		D3YZP9	Coiled-coil domain-containing protein 6	CCDC6_MOUSE	Ccdc6	14007	14159	13556	11720	11518	11280		13907.3	11506		-0.27339	0.0279451	0.00799641
	ENSMUSG00000074358	coiled-coil domain containing 61 [Source:MGI Symbol;Acc:MGI:2685005]	Ccdc61	8.6	8.6	9	11.2	9.1	7		8.73333	9.1		-0.0709285	0.417639	0.285884		Q3UJV1	Coiled-coil domain-containing protein 61	CCD61_MOUSE	Ccdc61	465	482	463	438	448	424		470	436.667		-0.106261	0.0752674	0.186579
	ENSMUSG00000049588	coiled-coil domain containing 69 [Source:MGI Symbol;Acc:MGI:1196234]	Ccdc69	30.3	35.1	31.7	34.1	31.2	25.1		32.3667	30.1333		-0.148992	0.179814	1.00183		Q3TCJ8	Coiled-coil domain-containing protein 69	CCD69_MOUSE	Ccdc69	3866	2496	3060	2933	2963	2867		3140.67	2921		-0.0816712	0.186983	0.636144
	ENSMUSG00000084883	coiled-coil domain containing 85C [Source:MGI Symbol;Acc:MGI:3644008]	Ccdc85c	18.7	18.9	19.6	28.2	20.7	20.4		19.0667	23.1		0.157388	0.10322	1.46823		E9Q6B2	Coiled-coil domain-containing protein 85C	CC85C_MOUSE	Ccdc85c	407	419	462	466	471	442		429.333	459.667		0.100077	0.0999933	0.279295
	ENSMUSG00000024732	coiled-coil domain containing 86 [Source:MGI Symbol;Acc:MGI:1277220]	Ccdc86	28.5	30.6	30.5	27.3	29.5	28.3		29.8667	28.3667		-0.050033	0.376903	0.375315		Q9JJ89	Coiled-coil domain-containing protein 86	CCD86_MOUSE	Ccdc86	9946	9123	11477	7979	9220	8307		10182	8502		-0.256332	0.0400794	0.0682323
	ENSMUSG00000047810	coiled-coil domain containing 88B [Source:MGI Symbol;Acc:MGI:1925567]	Ccdc88b	134.4	138.3	149	139.9	135.1	121.3		140.567	132.1		-0.127495	0.0691395	1.79932		Q4QRL3	Coiled-coil domain-containing protein 88B	CC88B_MOUSE	Ccdc88b	41283	40105	40849	30520	36138	35453		40745.7	34037		-0.263484	0.0288324	0.0294209
	ENSMUSG00000021182	coiled-coil domain containing 88C [Source:MGI Symbol;Acc:MGI:1915589]	Ccdc88c	83.1	73.7	80.5	80	72.6	69.5		79.1	74.0333		-0.124577	0.050748	2.04897		Q6VGS5;Q6VGS5-2	Protein Daple;Isoform 2 of Protein Daple	DAPLE_MOUSE	Ccdc88c	1521	1303	1252	881	1136	1134		1358.67	1050.33		-0.376165	0.0300123	0.0354335
	ENSMUSG00000041375	coiled-coil domain containing 9 [Source:MGI Symbol;Acc:MGI:1921443]	Ccdc9	39.3	39.4	41.7	39.9	40	36.8		40.1333	38.9		-0.0587556	0.312954	0.535075		Q8VC31	Coiled-coil domain-containing protein 9	CCDC9_MOUSE	Ccdc9	8356	8605	9762	8441	9138	8506		8907.67	8695		-0.0324637	0.209938	0.737581
	ENSMUSG00000037979	coiled-coil domain containing 92 [Source:MGI Symbol;Acc:MGI:106485]	Ccdc92	11.4	11.4	13.8	22.7	16	15.6		12.2	18.1		0.376048	0.016802	2.91864		Q8VDN4	Coiled-coil domain-containing protein 92	CCD92_MOUSE	Ccdc92	2045	1132	1898	1695	4887	134		1691.67	2238.67		-0.661639	0.184214	0.623764
	ENSMUSG00000026339	coiled-coil domain containing 93 [Source:MGI Symbol;Acc:MGI:1918079]	Ccdc93	12.7	12	12.1	11.3	11.5	11.4		12.2667	11.4		-0.0746572	0.21214	0.851992		Q7TQK5	Coiled-coil domain-containing protein 93	CCD93_MOUSE	Ccdc93	6186	5962	6305	5452	5792	5613		6151	5619		-0.13056	0.0568294	0.123066
	ENSMUSG00000002608	coiled-coil domain containing 97 [Source:MGI Symbol;Acc:MGI:1196455]	Ccdc97	30.7	28.2	28.6	33.9	27.4	26.7		29.1667	29.3333		-0.046049	0.384518	0.357438		Q9DBT3	Coiled-coil domain-containing protein 97	CCD97_MOUSE	Ccdc97	10470	8305	7035	5199	6630	7470		8603.33	6433		-0.416123	0.0434256	0.0793879
	ENSMUSG00000020702	chemokine (C-C motif) ligand 1 [Source:MGI Symbol;Acc:MGI:98258]	Ccl1	0.5	0.3	0.2	0.7	0.2	0.2		0.333333	0.366667		-0.209793	0.485032	0.147169		P10146	C-C motif chemokine 1	CCL1_MOUSE	Ccl1	7516	7761	13046	9492	10811	5689		9441	8664		-0.127476	0.202472	0.704254
	ENSMUSG00000018930	chemokine (C-C motif) ligand 4 [Source:MGI Symbol;Acc:MGI:98261]	Ccl4	15.7	21.6	19.3	12	19.5	14.2		18.8667	15.2333		-0.20432	0.280167	0.62843		P14097	C-C motif chemokine 4	CCL4_MOUSE	Ccl4	6106	13543	9567	7334	4079	4085		9738.67	5166		-0.898206	0.0335931	0.0482397
	ENSMUSG00000000378	cerebral cavernous malformation 2 [Source:MGI Symbol;Acc:MGI:2384924]	Ccm2	42.5	42.2	43.7	47.6	42	43		42.8	44.2		0.0127284	0.507272	0.100679		Q8K2Y9;Q8K2Y9-2	Cerebral cavernous malformations protein 2 homolog;Isoform 2 of Cerebral cavernous malformations protein 2 homolog	CCM2_MOUSE	Ccm2	9740	9183	9460	12198	9705	9826		9461	10576.3		0.153059	0.0851635	0.221316
	ENSMUSG00000027715	cyclin A2 [Source:MGI Symbol;Acc:MGI:108069]	Ccna2	281.3	272.7	293.6	376.1	306.7	310.5		282.533	331.1		0.155569	0.0392974	2.27387		P51943	Cyclin-A2	CCNA2_MOUSE	Ccna2	27189	22762	24091	21197	22255	22900		24680.7	22117.3		-0.154936	0.0660477	0.154242
	ENSMUSG00000041431	cyclin B1 [Source:MGI Symbol;Acc:MGI:88302]	Ccnb1	134.7	138.5	137	152.8	146.6	141.7		136.733	147.033		0.100964	0.171854	1.04078		P24860	G2/mitotic-specific cyclin-B1	CCNB1_MOUSE	Ccnb1	24424	25164	26303	21102	23720	23241		25297	22687.7		-0.158244	0.0519971	0.10662
	ENSMUSG00000032218	cyclin B2 [Source:MGI Symbol;Acc:MGI:88311]	Ccnb2	304.2	313.1	326.9	427.8	346.2	349		314.733	374.333		0.172116	0.0445967	2.16117		P30276	G2/mitotic-specific cyclin-B2	CCNB2_MOUSE	Ccnb2	8915	7383	8268	7311	7455	6783		8188.67	7183		-0.185927	0.0529546	0.110033
	ENSMUSG00000028252	cyclin C [Source:MGI Symbol;Acc:MGI:1858199]	Ccnc	32.8	30.3	31.2	30.3	32.6	32.4		31.4333	31.7667		0.0626962	0.278958	0.632816		Q62447	Cyclin-C	CCNC_MOUSE	Ccnc	6599	4683	4390	3541	3209	2903		5224	3217.67		-0.680025	0.0279451	0.00861052
	ENSMUSG00000000184	cyclin D2 [Source:MGI Symbol;Acc:MGI:88314]	Ccnd2	286.1	259.1	272.9	269.7	272	271.8		272.7	271.167		0.0133815	0.49922	0.120184		P30280	G1/S-specific cyclin-D2	CCND2_MOUSE	Ccnd2	4049	2960	3063	1776	2444	2229		3357.33	2149.67		-0.641279	0.0279451	0.0106746
	ENSMUSG00000034165	cyclin D3 [Source:MGI Symbol;Acc:MGI:88315]	Ccnd3	126.6	122.9	130.6	149.7	129.1	130.9		126.7	136.567		0.0608563	0.251495	0.716779		P30282	G1/S-specific cyclin-D3	CCND3_MOUSE	Ccnd3	10250	36444	11669	5981	13047	7607		19454.3	8878.33		-0.958803	0.0596566	0.133228
	ENSMUSG00000023572	cyclin D-type binding-protein 1 [Source:MGI Symbol;Acc:MGI:109595]	Ccndbp1	37.1	38.2	38.3	41.3	38	38.9		37.8667	39.4		0.0433293	0.40817	0.306163		Q3TVC7;Q3TVC7-3	Cyclin-D1-binding protein 1;Isoform 3 of Cyclin-D1-binding protein 1	CCDB1_MOUSE	Ccndbp1	761	970	604	1096	675	579		778.333	783.333		-0.0192677	0.25377	0.94856
	ENSMUSG00000002068	cyclin E1 [Source:MGI Symbol;Acc:MGI:88316]	Ccne1	115.6	106.1	110.1	122.2	107.4	118.3		110.6	115.967		0.0570985	0.340576	0.463394		Q61457	G1/S-specific cyclin-E1	CCNE1_MOUSE	Ccne1	2094	2148	2098	904	1968	1846		2113.33	1572.67		-0.507581	0.0632082	0.143905
	ENSMUSG00000021548	cyclin H [Source:MGI Symbol;Acc:MGI:1913921]	Ccnh	42.5	43.2	44.9	51.5	47.7	46.8		43.5333	48.6667		0.132749	0.0607239	1.90674		Q61458	Cyclin-H	CCNH_MOUSE	Ccnh	22165	14916	13380	10837	11145	10221		16820.3	10734.3		-0.613775	0.0279451	0.0201121
	ENSMUSG00000021258	cyclin K [Source:MGI Symbol;Acc:MGI:1276106]	Ccnk	122.4	126.5	125.8	126.4	122.3	119		124.9	122.567		-0.0290312	0.412217	0.297358		O88874	Cyclin-K	CCNK_MOUSE	Ccnk	10737	8300	9205	9723	10567	9570		9414	9953.33		0.0871221	0.15153	0.483328
	ENSMUSG00000027829	cyclin L1 [Source:MGI Symbol;Acc:MGI:1922664]	Ccnl1	63.5	51.4	54.1	53.7	51.9	46.8		56.3333	50.8		-0.136292	0.148167	1.166		Q52KE7;Q52KE7-2	Cyclin-L1;Isoform 2 of Cyclin-L1	CCNL1_MOUSE	Ccnl1	2106	1994	1910	2543	1853	1566		2003.33	1987.33		-0.0400883	0.230093	0.834479
	ENSMUSG00000029068	cyclin L2 [Source:MGI Symbol;Acc:MGI:1927119]	Ccnl2	107.6	82.9	87.8	84.3	72.5	65.3		92.7667	74.0333		-0.348144	0.0158985	2.9685		Q9JJA7	Cyclin-L2	CCNL2_MOUSE	Ccnl2	8110	8154	6572	5590	6448	6211		7612	6083		-0.319006	0.0301507	0.0361629
	ENSMUSG00000011960	cyclin T1 [Source:MGI Symbol;Acc:MGI:1328363]	Ccnt1	33.3	32.8	32.8	34.7	31.2	31.5		32.9667	32.4667		-0.0381618	0.361885	0.409544		Q9QWV9	Cyclin-T1	CCNT1_MOUSE	Ccnt1	6598	7185	6945	5457	6443	6328		6909.33	6076		-0.188467	0.0491272	0.0972573
	ENSMUSG00000026349	cyclin T2 [Source:MGI Symbol;Acc:MGI:1920199]	Ccnt2	18.9	15.1	15.8	17.4	15.2	13.8		16.6	15.4667		-0.123015	0.180403	0.997671		Q7TQK0	Cyclin-T2	CCNT2_MOUSE	Ccnt2	130	0	292	226	242	223		140.667	230.333		0.240551	0.160957	0.522035
	ENSMUSG00000024286	cyclin Y [Source:MGI Symbol;Acc:MGI:1915224]	Ccny	89.2	90.3	91	75.2	87.2	85.1		90.1667	82.5		-0.0720116	0.223444	0.80974		Q8BGU5	Cyclin-Y	CCNY_MOUSE	Ccny	3484	3326	3514	2254	2748	2852		3441.33	2618		-0.401601	0.0279451	0.0112063
	ENSMUSG00000079227	chemokine (C-C motif) receptor 5 [Source:MGI Symbol;Acc:MGI:107182]	Ccr5	108.2	97.3	108.9	104.2	94.1	107.5		104.8	101.933		-0.0549406	0.464465	0.185808		P51682	C-C chemokine receptor type 5	CCR5_MOUSE	Ccr5	17616	16917	11434	7599	9351	10173		15322.3	9041		-0.745624	0.0279451	0.0105927
	ENSMUSG00000034108	copper chaperone for superoxide dismutase [Source:MGI Symbol;Acc:MGI:1333783]	Ccs	30.1	28.9	27.2	29.8	27.1	26.5		28.7333	27.8		-0.0339579	0.458727	0.196405		Q9WU84	Copper chaperone for superoxide dismutase	CCS_MOUSE	Ccs	22508	23823	24750	20486	21721	21588		23693.7	21265		-0.155421	0.047502	0.0924791
	ENSMUSG00000034024	chaperonin containing Tcp1, subunit 2 (beta) [Source:MGI Symbol;Acc:MGI:107186]	Cct2	974.4	998.2	1004.6	999	1015.2	1000.7		992.4	1004.97		0.032916	0.363688	0.40527		P80314	T-complex protein 1 subunit beta	TCPB_MOUSE	Cct2	1158757	1167700	1138248	858453	1084298	953070		1.1549e+06	965274		-0.265279	0.0327157	0.0443459
	ENSMUSG00000001416	chaperonin containing Tcp1, subunit 3 (gamma) [Source:MGI Symbol;Acc:MGI:104708]	Cct3	249.8	257.9	256.6	257.1	267.6	265.4		254.767	263.367		0.0735687	0.253709	0.710016		P80318	T-complex protein 1 subunit gamma	TCPG_MOUSE	Cct3	1052542	1032780	1118121	819632	962570	902338		1.06781e+06	894847		-0.257245	0.0289486	0.0305198
	ENSMUSG00000007739	chaperonin containing Tcp1, subunit 4 (delta) [Source:MGI Symbol;Acc:MGI:104689]	Cct4	315.2	344.5	342.2	343.6	350.1	342.6		333.967	345.433		0.0578152	0.302841	0.564176		P80315	T-complex protein 1 subunit delta	TCPD_MOUSE	Cct4	1094694	1006568	1059682	806441	943655	894283		1053648	881460		-0.259609	0.0288324	0.0292145
	ENSMUSG00000022234	chaperonin containing Tcp1, subunit 5 (epsilon) [Source:MGI Symbol;Acc:MGI:107185]	Cct5	723.2	780.1	768.8	831.5	810.9	782.6		757.367	808.333		0.0898612	0.171854	1.04062		P80316	T-complex protein 1 subunit epsilon	TCPE_MOUSE	Cct5	663128	673517	667013	507189	603623	558503		667886	556438		-0.266993	0.0283715	0.0248864
	ENSMUSG00000029447	chaperonin containing Tcp1, subunit 6a (zeta) [Source:MGI Symbol;Acc:MGI:107943]	Cct6a	451.7	472.9	471.3	476.5	496.8	482		465.3	485.1		0.0806948	0.257312	0.697234		P80317	T-complex protein 1 subunit zeta	TCPZ_MOUSE	Cct6a	641565	606626	664611	521222	574843	560375		637601	552147		-0.207818	0.0326056	0.0440002
	ENSMUSG00000030007	chaperonin containing Tcp1, subunit 7 (eta) [Source:MGI Symbol;Acc:MGI:107184]	Cct7	262.4	277.5	273.7	266.9	275.4	270.8		271.2	271.033		0.0196695	0.478089	0.160057		P80313	T-complex protein 1 subunit eta	TCPH_MOUSE	Cct7	734144	722478	727629	540524	642226	601694		728084	594815		-0.29525	0.0279451	0.0166454
	ENSMUSG00000025613	chaperonin containing Tcp1, subunit 8 (theta) [Source:MGI Symbol;Acc:MGI:107183]	Cct8	618.3	624.2	625.4	634.8	635.3	627.5		622.633	632.533		0.0361169	0.36546	0.401704		P42932	T-complex protein 1 subunit theta	TCPQ_MOUSE	Cct8	961739	939657	1025093	770701	885013	838711		975496	831475		-0.231806	0.0308984	0.0385151
	ENSMUSG00000029617	CCZ1 vacuolar protein trafficking and biogenesis associated [Source:MGI Symbol;Acc:MGI:2141070]	Ccz1	75.7	74.3	75	73.1	72.5	75.9		75	73.8333		-0.00161877	0.554616	0.0128524		Q8C1Y8	Vacuolar fusion protein CCZ1 homolog	CCZ1_MOUSE	Ccz1	10019	9665	9986	14237	8995	19335		9890	14189		0.452165	0.063973	0.146662
	ENSMUSG00000038304	CD160 antigen [Source:MGI Symbol;Acc:MGI:1860383]	Cd160	129.8	136.1	137.8	143.1	136.9	146		134.567	142		0.0770587	0.335097	0.47779		O88875	CD160 antigen	BY55_MOUSE	Cd160	7402	6720	6228	5535	5256	5620		6783.33	5470.33		-0.307342	0.0279451	0.0159837
	ENSMUSG00000027863	CD2 antigen [Source:MGI Symbol;Acc:MGI:88320]	Cd2	394.3	410.3	418.3	574.5	467	454.7		407.633	498.733		0.213907	0.0161798	2.94778		P08920	T-cell surface antigen CD2	CD2_MOUSE	Cd2	68881	71262	76188	75731	69990	67546		72110.3	71089		-0.0209666	0.226134	0.814423
	ENSMUSG00000034028	CD226 antigen [Source:MGI Symbol;Acc:MGI:3039602]	Cd226	33.7	32.9	35.4	48.9	35.5	41.2		34	41.8667		0.198204	0.0759483	1.72798		Q8K4F0	CD226 antigen	CD226_MOUSE	Cd226	24809	27895	22903	17068	21368	23533		25202.3	20656.3		-0.294992	0.047385	0.092076
	ENSMUSG00000004709	CD244 molecule A [Source:MGI Symbol;Acc:MGI:109294]	Cd244a	54.7	54.4	51.9	23.5	40.3	41.5		53.6667	35.1		-0.43667	0.0146451	3.02669		Q07763	Natural killer cell receptor 2B4	CD244_MOUSE	Cd244	16330	15300	13979	6761	8776	9526		15203	8354.33		-0.87581	0.0279451	0.00108773
	ENSMUSG00000005763	CD247 antigen [Source:MGI Symbol;Acc:MGI:88334]	Cd247	134.8	138.8	132.9	132.9	134.1	133.5		135.5	133.5		0.00628724	0.531537	0.0560415		P24161	T-cell surface glycoprotein CD3 zeta chain	CD3Z_MOUSE	Cd247	160497	156903	165492	116064	138035	139276		160964	131125		-0.300426	0.0281378	0.0227316
	ENSMUSG00000030336	CD27 antigen [Source:MGI Symbol;Acc:MGI:88326]	Cd27	17.2	13.6	17	51.3	21.9	24.2		15.9333	32.4667		0.627894	0.0249786	2.62995		P41272	CD27 antigen	CD27_MOUSE	Cd27	8122	6360	8035	40682	13845	7433		7505.67	20653.3		1.11147	0.053513	0.112248
	ENSMUSG00000026012	CD28 antigen [Source:MGI Symbol;Acc:MGI:88327]	Cd28	109.9	100.6	106.1	102.2	100.8	110.5		105.533	104.5		0.00951163	0.527951	0.0631706		P31041	T-cell-specific surface glycoprotein CD28	CD28_MOUSE	Cd28	28071	22998	21427	17863	19271	24134		24165.3	20422.7		-0.245182	0.0711472	0.171877
	ENSMUSG00000061665	CD2-associated protein [Source:MGI Symbol;Acc:MGI:1330281]	Cd2ap	10.4	9.4	10.4	12.7	10.7	10		10.0667	11.1333		0.0747295	0.256777	0.699226		Q9JLQ0	CD2-associated protein	CD2AP_MOUSE	Cd2ap	7877	6644	7810	6857	7261	6750		7443.67	6956		-0.0941292	0.123826	0.370374
	ENSMUSG00000042502	CD2 cytoplasmic tail binding protein 2 [Source:MGI Symbol;Acc:MGI:1917483]	Cd2bp2	95.7	92.4	94.5	98.5	90.1	88.4		94.2	92.3333		-0.0467109	0.297553	0.578338		Q9CWK3	CD2 antigen cytoplasmic tail-binding protein 2	CD2B2_MOUSE	Cd2bp2	38879	40507	48465	38790	43650	42839		42617	41759.7		-0.0245048	0.230225	0.835333
	ENSMUSG00000030798	CD37 antigen [Source:MGI Symbol;Acc:MGI:88330]	Cd37	134.9	131.3	130.4	123.7	122.5	118.2		132.2	121.467		-0.107325	0.11712	1.36157		Q61470	Leukocyte antigen CD37	CD37_MOUSE	Cd37	7231	6758	8994	6154	6540	6397		7661	6363.67		-0.257181	0.0445195	0.0829223
	ENSMUSG00000032094	CD3 antigen, delta polypeptide [Source:MGI Symbol;Acc:MGI:88331]	Cd3d	452.1	487.4	469.9	482.2	501.9	495.4		469.8	493.167		0.0979236	0.172625	1.0358		P04235	T-cell surface glycoprotein CD3 delta chain	CD3D_MOUSE	Cd3d	67722	56142	68009	56255	62347	55728		63957.7	58110		-0.134576	0.0956179	0.262885
	ENSMUSG00000032093	CD3 antigen, epsilon polypeptide [Source:MGI Symbol;Acc:MGI:88332]	Cd3e	258.3	262.3	270.8	314.9	284.8	275.6		263.8	291.767		0.109713	0.107554	1.43032		P22646	T-cell surface glycoprotein CD3 epsilon chain	CD3E_MOUSE	Cd3e	136030	140842	145679	109788	126821	125359		140850	120656		-0.225739	0.0329799	0.0453728
	ENSMUSG00000002033	CD3 antigen, gamma polypeptide [Source:MGI Symbol;Acc:MGI:88333]	Cd3g	306.5	309.2	313.4	346.9	334.5	336.2		309.7	339.2		0.130946	0.0694453	1.79471		P11942	T-cell surface glycoprotein CD3 gamma chain	CD3G_MOUSE	Cd3g	124815	125659	137131	102021	115345	108608		129202	108658		-0.250303	0.0287001	0.0279444
	ENSMUSG00000005087	CD44 antigen [Source:MGI Symbol;Acc:MGI:88338]	Cd44	150.8	133.5	144.2	129	144.8	154.9		142.833	142.9		0.0605247	0.344101	0.455043		P15379;P15379-10;P15379-11;P15379-2;P15379-3;P15379-4;P15379-5;P15379-6;P15379-7;P15379-8;P15379-9	CD44 antigen;Isoform 8 of CD44 antigen;Isoform 9 of CD44 antigen;Isoform 13 of CD44 antigen;Isoform 12 of CD44 antigen;Isoform 4 of CD44 antigen;Isoform 6 of CD44 antigen;Isoform 7 of CD44 antigen;Isoform 2 of CD44 antigen;Isoform 3 of CD44 antigen;Isoform 5 of CD44 antigen	CD44_MOUSE	Cd44	17447	15459	19694	11990	17154	17193		17533.3	15445.7		-0.195661	0.108222	0.31105
	ENSMUSG00000015355	CD48 antigen [Source:MGI Symbol;Acc:MGI:88339]	Cd48	568	593.1	579.1	681.3	646.3	612.5		580.067	646.7		0.14729	0.0211485	2.74954		P18181	CD48 antigen	CD48_MOUSE	Cd48	193253	180271	216757	192798	191803	181787		196760	188796		-0.0559241	0.173757	0.577255
	ENSMUSG00000024669	CD5 antigen [Source:MGI Symbol;Acc:MGI:88340]	Cd5	7.3	4.7	6.4	15.4	7.5	7.1		6.13333	10		0.368044	0.0963206	1.53256		P13379	T-cell surface glycoprotein CD5	CD5_MOUSE	Cd5	9549	4810	3582	6933	6509	3597		5980.33	5679.67		-0.00648068	0.261782	0.9884
	ENSMUSG00000024670	CD6 antigen [Source:MGI Symbol;Acc:MGI:103566]	Cd6	10.2	6.6	9.1	16.6	9.1	8.7		8.63333	11.4667		0.141514	0.29827	0.576667		Q61003;Q61003-2	T-cell differentiation antigen CD6;Isoform 2 of T-cell differentiation antigen CD6	CD6_MOUSE	Cd6	1286	434	1458	1397	1495	664		1059.33	1185.33		0.256361	0.192227	0.658779
	ENSMUSG00000030156	CD69 antigen [Source:MGI Symbol;Acc:MGI:88343]	Cd69	42.1	45.7	43.3	32.8	44	39.9		43.7	38.9		-0.0695872	0.335571	0.475848		P37217	Early activation antigen CD69	CD69_MOUSE	Cd69	41526	42738	42888	19584	31634	30489		42384	27235.7		-0.670223	0.0279451	0.0136736
	ENSMUSG00000027215	CD82 antigen [Source:MGI Symbol;Acc:MGI:104651]	Cd82	198.9	205.5	199.5	201.9	191.7	196		201.3	196.533		-0.0289757	0.42158	0.276427		P40237	CD82 antigen	CD82_MOUSE	Cd82	19294	19581	23441	18629	22321	19771		20772	20240.3		-0.0357677	0.217381	0.771792
	ENSMUSG00000038147	CD84 antigen [Source:MGI Symbol;Acc:MGI:1336885]	Cd84	18.5	18.7	19.3	20.6	19.5	20.3		18.8333	20.1333		0.0863663	0.186855	0.967852		Q18PI6;Q18PI6-3	SLAM family member 5;Isoform 3 of SLAM family member 5	SLAF5_MOUSE	Cd84	4502	4372	5184	3669	4532	3926		4686	4042.33		-0.214777	0.0548787	0.116848
	ENSMUSG00000053977	CD8 antigen, alpha chain [Source:MGI Symbol;Acc:MGI:88346]	Cd8a	620.6	571.9	617.9	639	576.1	609.5		603.467	608.2		-0.00899072	0.525753	0.0671498		P01731	T-cell surface glycoprotein CD8 alpha chain	CD8A_MOUSE	Cd8a	56288	58302	51649	42920	46422	49911		55413	46417.7		-0.256432	0.0299982	0.0351405
	ENSMUSG00000053044	CD8 antigen, beta chain 1 [Source:MGI Symbol;Acc:MGI:88347]	Cd8b1	715.9	664.3	703.7	891	765.1	743		694.633	799.7		0.155337	0.03099	2.45425		P10300	T-cell surface glycoprotein CD8 beta chain	CD8B_MOUSE	Cd8b	172456	182025	166141	158466	154828	156922		173541	156739		-0.145962	0.049166	0.097599
	ENSMUSG00000022657	CD96 antigen [Source:MGI Symbol;Acc:MGI:1934368]	Cd96	255.8	244.9	249.3	256.2	250.6	261.2		250	256		0.0512152	0.336903	0.471962		Q3U0X8	T-cell surface protein tactile	TACT_MOUSE	Cd96	3252	3171	2979	2293	2643	2706		3134	2547.33		-0.30184	0.0279451	0.019837
	ENSMUSG00000027284	congenital dyserythropoietic anemia, type I (human) [Source:MGI Symbol;Acc:MGI:1916218]	Cdan1	12.2	10.5	11.6	15.2	11.2	10.8		11.4333	12.4		0.00950822	0.532026	0.0553441		Q8CC12;Q8CC12-2	Codanin-1;Isoform 2 of Codanin-1	CDAN1_MOUSE	Cdan1	2697	2895	2399	2316	2448	2382		2663.67	2382		-0.157313	0.0645311	0.149108
	ENSMUSG00000039128	cell division cycle 123 [Source:MGI Symbol;Acc:MGI:2138811]	Cdc123	73.4	76.3	75.7	76.6	75.4	79		75.1333	77		0.049373	0.323148	0.508965		Q8CII2	Cell division cycle protein 123 homolog	CD123_MOUSE	Cdc123	35494	32447	32657	23657	27448	26424		33532.7	25843		-0.377412	0.0279451	0.00632044
	ENSMUSG00000038416	CDC16 cell division cycle 16 [Source:MGI Symbol;Acc:MGI:1917207]	Cdc16	62	61.1	62.2	61.9	62.4	59.8		61.7667	61.3667		0.00236689	0.550412	0.019255		Q8R349	Cell division cycle protein 16 homolog	CDC16_MOUSE	Cdc16	18749	17266	17707	14585	15824	14528		17907.3	14979		-0.257877	0.0279451	0.0181552
	ENSMUSG00000006398	cell division cycle 20 [Source:MGI Symbol;Acc:MGI:1859866]	Cdc20	235.9	252.9	260.7	339.2	282.5	267.4		249.833	296.367		0.166436	0.0605335	1.90838		Q9JJ66	Cell division cycle protein 20 homolog	CDC20_MOUSE	Cdc20	6716	6810	6998	6715	6810	6752		6841.33	6759		-0.0172809	0.225233	0.80982
	ENSMUSG00000024370	CDC23 cell division cycle 23 [Source:MGI Symbol;Acc:MGI:1098815]	Cdc23	27.1	23.9	26.2	27.8	22.8	26.2		25.7333	25.6		-0.0477067	0.380051	0.367458		Q8BGZ4	Cell division cycle protein 23 homolog	CDC23_MOUSE	Cdc23	26944	23459	23734	19482	21647	20585		24712.3	20571.3		-0.263053	0.0288324	0.029317
	ENSMUSG00000066149	cell division cycle 26 [Source:MGI Symbol;Acc:MGI:1913690]	Cdc26	10.1	10.5	10.1	11.2	10.7	10.3		10.2333	10.7333		0.0674463	0.29827	0.576763		Q99JP4	Anaphase-promoting complex subunit CDC26	CDC26_MOUSE	Cdc26	4461	4052	4423	3478	4587	2904		4312	3656.33		-0.262392	0.0744551	0.183334
	ENSMUSG00000020687	cell division cycle 27 [Source:MGI Symbol;Acc:MGI:102685]	Cdc27	72.7	70	73.9	73	72.2	71.6		72.2	72.2667		0.00422539	0.540164	0.0387818		A2A6Q5;A2A6Q5-3	Cell division cycle protein 27 homolog;Isoform 3 of Cell division cycle protein 27 homolog	CDC27_MOUSE	Cdc27	10132	7142	6614	5313	6080	6679		7962.67	6024		-0.383156	0.0452487	0.0853254
	ENSMUSG00000020307	cell division cycle 34 [Source:MGI Symbol;Acc:MGI:102657]	Cdc34	289.5	331.2	312.9	300.4	323	312.9		311.2	312.1		0.038107	0.446221	0.222081		Q8CFI2	Ubiquitin-conjugating enzyme E2 R1	UB2R1_MOUSE	Cdc34	51498	49108	55586	37277	45058	40755		52064	41030		-0.34605	0.0279451	0.0149407
	ENSMUSG00000019471	cell division cycle 37 [Source:MGI Symbol;Acc:MGI:109531]	Cdc37	119.7	123.4	125.6	135.6	127.5	124.4		122.9	129.167		0.0536106	0.242143	0.746044		Q61081	Hsp90 co-chaperone Cdc37	CDC37_MOUSE	Cdc37	210904	222457	257376	212968	234871	220283		230246	222707		-0.0440424	0.197912	0.683424
	ENSMUSG00000024780	cell division cycle 37-like 1 [Source:MGI Symbol;Acc:MGI:1914322]	Cdc37l1	13.2	10.9	11.9	12.1	10.8	10.7		12	11.2		-0.118477	0.154188	1.13112		Q9CZP7;Q9CZP7-2;Q9CZP7-3;Q9CZP7-4	Hsp90 co-chaperone Cdc37-like 1;Isoform 2 of Hsp90 co-chaperone Cdc37-like 1;Isoform 3 of Hsp90 co-chaperone Cdc37-like 1;Isoform 4 of Hsp90 co-chaperone Cdc37-like 1	CD37L_MOUSE	Cdc37l1	930	1282	716	525	761	878		976	721.333		-0.427693	0.0715271	0.173656
	ENSMUSG00000038446	cell division cycle 40 [Source:MGI Symbol;Acc:MGI:1918963]	Cdc40	31.3	32.1	31.6	36.4	33.5	34.5		31.6667	34.8		0.130504	0.0485325	2.08961		Q9DC48	Pre-mRNA-processing factor 17	PRP17_MOUSE	Cdc40	29140	27696	33478	31418	31155	27605		30104.7	30059.3		3.09e-05	0.263496	0.999778
	ENSMUSG00000006699	cell division cycle 42 [Source:MGI Symbol;Acc:MGI:106211]	Cdc42	841.2	854.1	847.9	844.8	874.8	873		847.733	864.2		0.0557559	0.263434	0.677953		P60766	Cell division control protein 42 homolog	CDC42_MOUSE	Cdc42	1235375	1181145	1050662	850172	972039	936399		1.15573e+06	919537		-0.328775	0.0279451	0.016599
	ENSMUSG00000052298	CDC42 small effector 2 [Source:MGI Symbol;Acc:MGI:1919979]	Cdc42se2	147.6	151.7	150	151.6	150	154		149.767	151.867		0.0361633	0.368834	0.394188		Q8BGH7	CDC42 small effector protein 2	C42S2_MOUSE	Cdc42se2	27512	27359	24224	17096	25199	24306		26365	22200.3		-0.266725	0.0688159	0.163607
	ENSMUSG00000000028	cell division cycle 45 [Source:MGI Symbol;Acc:MGI:1338073]	Cdc45	76.9	80.6	85.8	87.5	78.6	80.8		81.1	82.3		-0.0212935	0.470377	0.174179		Q9Z1X9	Cell division control protein 45 homolog	CDC45_MOUSE	Cdc45	15495	11593	13449	9741	12383	11903		13512.3	11342.3		-0.250243	0.06262	0.142326
	ENSMUSG00000023932	cell division cycle 5-like (S. pombe) [Source:MGI Symbol;Acc:MGI:1918952]	Cdc5l	124.8	128.8	126.1	146.6	142	138		126.567	142.2		0.170984	0.00872877	3.4697		Q6A068	Cell division cycle 5-like protein	CDC5L_MOUSE	Cdc5l	80379	70679	78393	69068	72408	71185		76483.7	70887		-0.107695	0.0907396	0.243104
	ENSMUSG00000026361	cell division cycle 73, Paf1/RNA polymerase II complex component [Source:MGI Symbol;Acc:MGI:2384876]	Cdc73	16.1	14.1	15.1	14.9	15	15		15.1	14.9667		0.00468433	0.541295	0.0364349		Q8JZM7	Parafibromin	CDC73_MOUSE	Cdc73	86366	73213	100133	84227	86848	70849		86570.7	80641.3		-0.0962953	0.163864	0.535591
	ENSMUSG00000048922	cell division cycle associated 2 [Source:MGI Symbol;Acc:MGI:1919787]	Cdca2	50	50	52.4	58.5	51.9	51.3		50.8	53.9		0.043851	0.334039	0.480431		Q14B71	Cell division cycle-associated protein 2	CDCA2_MOUSE	Cdca2	3424	3414	4063	4311	4260	3995		3633.67	4188.67		0.209127	0.0436669	0.080216
	ENSMUSG00000023505	cell division cycle associated 3 [Source:MGI Symbol;Acc:MGI:1315198]	Cdca3	134.5	141.4	142.8	181.7	152.8	147.7		139.567	160.733		0.140446	0.0583811	1.9378		Q99M54	Cell division cycle-associated protein 3	CDCA3_MOUSE	Cdca3	5940	5818	5658	3422	7256	5634		5805.33	5437.33		-0.161035	0.17256	0.572144
	ENSMUSG00000024791	cell division cycle associated 5 [Source:MGI Symbol;Acc:MGI:1915099]	Cdca5	63.6	71.9	71.7	99.9	78.8	75.9		69.0667	84.8667		0.199269	0.0485325	2.08911		Q9CPY3	Sororin	CDCA5_MOUSE	Cdca5	10233	4552	7966	10360	10066	8341		7583.67	9589		0.409693	0.0855672	0.222927
	ENSMUSG00000055612	cell division cycle associated 7 [Source:MGI Symbol;Acc:MGI:1914203]	Cdca7	106.5	100.6	108.9	153.3	115.9	116.6		105.333	128.6		0.183886	0.0305216	2.46338		Q9D0M2	Cell division cycle-associated protein 7	CDCA7_MOUSE	Cdca7	1773	2287	2204	2242	2287	15100		2088	6543		1.03832	0.0842025	0.218476
	ENSMUSG00000021175	cell division cycle associated 7 like [Source:MGI Symbol;Acc:MGI:2384982]	Cdca7l	73.9	69.6	78.3	120.8	90.4	86		73.9333	99.0667		0.29114	0.00394696	4.0785		Q922M5	Cell division cycle-associated 7-like protein	CDA7L_MOUSE	Cdca7l	7324	7418	8624	10704	8983	7577		7788.67	9088		0.212294	0.0801	0.204077
	ENSMUSG00000028873	cell division cycle associated 8 [Source:MGI Symbol;Acc:MGI:1196274]	Cdca8	70.2	71.2	78.9	93.8	84.5	78.7		73.4333	85.6667		0.159254	0.0505252	2.05119		Q8BHX3	Borealin	BOREA_MOUSE	Cdca8	96059	109587	100809	107539	117792	104343		102152	109891		0.105581	0.103632	0.293432
	ENSMUSG00000000303	cadherin 1 [Source:MGI Symbol;Acc:MGI:88354]	Cdh1	83.4	91.5	86.2	57.9	69.9	79.8		87.0333	69.2		-0.238563	0.117942	1.3566		P09803	Cadherin-1	CADH1_MOUSE	Cdh1	11023	4356	2742	3341	4044	2486		6040.33	3290.33		-0.656929	0.0922812	0.24956
	ENSMUSG00000030682	CDP-diacylglycerol--inositol 3-phosphatidyltransferase (phosphatidylinositol synthase) [Source:MGI Symbol;Acc:MGI:105491]	Cdipt	128.7	143.8	143.3	132.2	127.8	129.8		138.6	129.933		-0.100832	0.143664	1.19137		Q8VDP6	CDP-diacylglycerol--inositol 3-phosphatidyltransferase	CDIPT_MOUSE	Cdipt	75827	70818	67330	49258	64694	60526		71325	58159.3		-0.302177	0.0346481	0.0516143
	ENSMUSG00000019942	cyclin-dependent kinase 1 [Source:MGI Symbol;Acc:MGI:88351]	Cdk1	153.3	164.5	163.3	178.9	170.6	167		160.367	172.167		0.0911622	0.191488	0.9456		P11440	Cyclin-dependent kinase 1	CDK1_MOUSE	Cdk1	477139	473694	511323	436494	464510	457863		487385	452956		-0.105337	0.0837222	0.21647
	ENSMUSG00000029062	cyclin-dependent kinase 11B [Source:MGI Symbol;Acc:MGI:88353]	Cdk11b	116.6	112.5	113.5	112.8	105.5	101.1		114.2	106.467		-0.110374	0.0655846	1.84032		P24788	Cyclin-dependent kinase 11B	CD11B_MOUSE	Cdk11b	31292	33431	35615	28286	32359	31316		33446	30653.7		-0.126103	0.0863334	0.22578
	ENSMUSG00000003119	cyclin-dependent kinase 12 [Source:MGI Symbol;Acc:MGI:1098802]	Cdk12	43.7	43.4	43.5	42.1	43.1	40.1		43.5333	41.7667		-0.043538	0.313574	0.533017		Q14AX6;Q14AX6-3	Cyclin-dependent kinase 12;Isoform 3 of Cyclin-dependent kinase 12	CDK12_MOUSE	Cdk12	1282	870	3152	795	1399	1042		1768	1078.67		-0.533658	0.110831	0.321646
	ENSMUSG00000041297	cyclin-dependent kinase 13 [Source:MGI Symbol;Acc:MGI:1916812]	Cdk13	38.8	37.1	37.8	38.4	38.6	37.6		37.9	38.2		0.0293425	0.385092	0.355253		Q69ZA1	Cyclin-dependent kinase 13	CDK13_MOUSE	Cdk13	2725	2521	2091	1804	2295	2353		2445.67	2150.67		-0.18675	0.0961531	0.265199
	ENSMUSG00000020015	cyclin-dependent kinase 17 [Source:MGI Symbol;Acc:MGI:97517]	Cdk17	52.1	49.1	52.6	57.2	51.2	50.5		51.2667	52.9667		0.0117322	0.50781	0.0997214		Q8K0D0	Cyclin-dependent kinase 17	CDK17_MOUSE	Cdk17	9047	7867	7534	6391	7852	6830		8149.33	7024.33		-0.215227	0.0551026	0.117514
	ENSMUSG00000038481	cyclin-dependent kinase 19 [Source:MGI Symbol;Acc:MGI:1925584]	Cdk19	22.7	23.8	24.3	36.7	28	26.2		23.6	30.3		0.246075	0.0389933	2.27809		Q8BWD8	Cyclin-dependent kinase 19	CDK19_MOUSE	Cdk19	3285	9724	3398	2762	3534	3321		5469	3205.67		-0.581165	0.0873904	0.229735
	ENSMUSG00000025358	cyclin-dependent kinase 2 [Source:MGI Symbol;Acc:MGI:104772]	Cdk2	42	39.5	40.7	51.7	44.1	40.8		40.7333	45.5333		0.105415	0.137094	1.22879		P97377;P97377-2	Cyclin-dependent kinase 2;Isoform CDK2-alpha of Cyclin-dependent kinase 2	CDK2_MOUSE	Cdk2	97944	90566	96728	81824	89382	92171		95079.3	87792.3		-0.116013	0.0840292	0.217585
	ENSMUSG00000029394	CDK2 (cyclin-dependent kinase 2)-associated protein 1 [Source:MGI Symbol;Acc:MGI:1202069]	Cdk2ap1	33.6	32.2	33.5	33.8	31.1	30.4		33.1	31.7667		-0.0799404	0.237531	0.761821		O35207	Cyclin-dependent kinase 2-associated protein 1	CDKA1_MOUSE	Cdk2ap1	17483	8307	9552	9928	8017	6861		11780.7	8268.67		-0.448342	0.0767146	0.192259
	ENSMUSG00000006728	cyclin-dependent kinase 4 [Source:MGI Symbol;Acc:MGI:88357]	Cdk4	276	292.2	288.6	380	311.2	301.9		285.6	331.033		0.145074	0.0524105	2.02182		P30285	Cyclin-dependent kinase 4	CDK4_MOUSE	Cdk4	62352	59619	61257	51426	61854	59518		61076	57599.3		-0.0887973	0.12863	0.3888
	ENSMUSG00000028969	cyclin-dependent kinase 5 [Source:MGI Symbol;Acc:MGI:101765]	Cdk5	26.6	25.7	26.7	29.8	28.1	24		26.3333	27.3		0.0152153	0.521725	0.0742005		P49615	Cyclin-dependent-like kinase 5	CDK5_MOUSE	Cdk5	12397	10190	10094	9997	10213	9569		10893.7	9926.33		-0.128076	0.0982157	0.272878
	ENSMUSG00000027487	CDK5 regulatory subunit associated protein 1 [Source:MGI Symbol;Acc:MGI:1914221]	Cdk5rap1	12.7	11.9	12.1	12.6	11.3	9.9		12.2333	11.2667		-0.157204	0.219393	0.825294		Q8BTW8	Mitochondrial tRNA methylthiotransferase CDK5RAP1	CK5P1_MOUSE	Cdk5rap1	1700	1360	1322	1127	1171	1066		1460.67	1121.33		-0.373143	0.0279451	0.0207758
	ENSMUSG00000039298	CDK5 regulatory subunit associated protein 2 [Source:MGI Symbol;Acc:MGI:2384875]	Cdk5rap2	12.9	12.5	12.7	13.1	11.4	11.5		12.7	12		-0.106112	0.0963047	1.53318		Q8K389	CDK5 regulatory subunit-associated protein 2	CK5P2_MOUSE	Cdk5rap2	1349	154	94	68	83	1106		532.333	419		-0.548471	0.205087	0.715596
	ENSMUSG00000018669	CDK5 regulatory subunit associated protein 3 [Source:MGI Symbol;Acc:MGI:1933126]	Cdk5rap3	37.6	35.8	36.8	40.2	37	36.4		36.7333	37.8667		0.02864	0.42158	0.276383		Q99LM2	CDK5 regulatory subunit-associated protein 3	CK5P3_MOUSE	Cdk5rap3	21726	18422	18361	13615	15739	14113		19503	14489		-0.426977	0.0279451	0.00723074
	ENSMUSG00000040274	cyclin-dependent kinase 6 [Source:MGI Symbol;Acc:MGI:1277162]	Cdk6	126.5	119.8	127.8	141.4	125.7	120.4		124.7	129.167		0.00841969	0.53367	0.0516587		Q64261	Cyclin-dependent kinase 6	CDK6_MOUSE	Cdk6	183309	170107	191222	193519	190132	179935		181546	187862		0.0503279	0.170521	0.563888
	ENSMUSG00000069089	cyclin-dependent kinase 7 [Source:MGI Symbol;Acc:MGI:102956]	Cdk7	43.3	45.4	41.7	40.2	41.4	42.7		43.4667	41.4333		-0.0159072	0.513984	0.0885867		Q03147	Cyclin-dependent kinase 7	CDK7_MOUSE	Cdk7	30221	26055	26466	22278	24750	24491		27580.7	23839.7		-0.208651	0.0412923	0.0719214
	ENSMUSG00000009555	cyclin-dependent kinase 9 (CDC2-related kinase) [Source:MGI Symbol;Acc:MGI:1328368]	Cdk9	91.4	92.5	92.2	87.6	89	84.6		92.0333	87.0667		-0.0656481	0.197066	0.921298		Q99J95	Cyclin-dependent kinase 9	CDK9_MOUSE	Cdk9	31519	29714	28780	21982	24974	24937		30004.3	23964.3		-0.325798	0.0279451	0.0107855
	ENSMUSG00000006191	CDK5 regulatory subunit associated protein 1-like 1 [Source:MGI Symbol;Acc:MGI:1921765]	Cdkal1	4.8	4.8	4.9	5.2	4.7	4.9		4.83333	4.93333		0.0213399	0.494682	0.128773		Q91WE6;Q91WE6-2	Threonylcarbamoyladenosine tRNA methylthiotransferase;Isoform 2 of Threonylcarbamoyladenosine tRNA methylthiotransferase	CDKAL_MOUSE	Cdkal1	4462	4205	3239	2295	2987	2884		3968.67	2722		-0.540027	0.0279451	0.0173879
	ENSMUSG00000023067	cyclin-dependent kinase inhibitor 1A (P21) [Source:MGI Symbol;Acc:MGI:104556]	Cdkn1a	226.9	255.2	214.4	179.6	249.3	220.9		232.167	216.6		0.0343976	0.483627	0.150102		P39689	Cyclin-dependent kinase inhibitor 1	CDN1A_MOUSE	Cdkn1a	13721	14194	15049	5500	11904	10509		14321.3	9304.33		-0.69692	0.035638	0.0544183
	ENSMUSG00000003031	cyclin-dependent kinase inhibitor 1B [Source:MGI Symbol;Acc:MGI:104565]	Cdkn1b	28.7	21.2	24.8	43.4	25.7	27.8		24.9	32.3		0.195478	0.163179	1.08414		P46414	Cyclin-dependent kinase inhibitor 1B	CDN1B_MOUSE	Cdkn1b	3650	6182	3268	3918	6060	5929		4366.67	5302.33		0.310949	0.113177	0.330934
	ENSMUSG00000044303	cyclin dependent kinase inhibitor 2A [Source:MGI Symbol;Acc:MGI:104738]	Cdkn2a	106.1	107.8	115.4	102.5	128.2	112.8		109.767	114.5		0.105067	0.250559	0.721619		Q64364	Tumor suppressor ARF	ARF_MOUSE	Cdkn2a	9087	8039	3735	2337	3202	3815		6953.67	3118		-1.08554	0.0286265	0.0277343
	ENSMUSG00000038069	CDKN2A interacting protein [Source:MGI Symbol;Acc:MGI:1918175]	Cdkn2aip	16.4	16.2	16.9	21.4	17.7	17.2		16.5	18.7667		0.114897	0.21033	0.858734		Q8BI72	CDKN2A-interacting protein	CARF_MOUSE	Cdkn2aip	10972	12219	12652	12023	12204	11823		11947.7	12016.7		0.0108097	0.244196	0.902609
	ENSMUSG00000073802	cyclin dependent kinase inhibitor 2B [Source:MGI Symbol;Acc:MGI:104737]	Cdkn2b	51.5	50	67.6	37	58.3	63.4		56.3667	52.9		-0.0332296	0.512291	0.0918871		P55271	Cyclin-dependent kinase 4 inhibitor B	CDN2B_MOUSE	Cdkn2b	1633	1589	622	559	1058	569		1281.33	728.667		-0.753957	0.0642523	0.147891
	ENSMUSG00000096472	cyclin dependent kinase inhibitor 2D [Source:MGI Symbol;Acc:MGI:105387]	Cdkn2d	88.7	101.5	99	104	102.9	100.8		96.4	102.567		0.0868469	0.218596	0.828498		Q60773	Cyclin-dependent kinase 4 inhibitor D	CDN2D_MOUSE	Cdkn2d	3452	3488	3518	2675	3206	2220		3486	2700.33		-0.384572	0.0300123	0.0354587
	ENSMUSG00000058793	CDP-diacylglycerol synthase (phosphatidate cytidylyltransferase) 2 [Source:MGI Symbol;Acc:MGI:1332236]	Cds2	76.7	69.8	75.4	79.9	69.7	68.8		73.9667	72.8		-0.0630849	0.257097	0.697981		Q99L43	Phosphatidate cytidylyltransferase 2	CDS2_MOUSE	Cds2	15718	15353	13440	10157	11685	12107		14837	11316.3		-0.391499	0.0279451	0.0113923
	ENSMUSG00000032803	carnitine deficiency-associated gene expressed in ventricle 3 [Source:MGI Symbol;Acc:MGI:2448759]	Cdv3	136.8	137.3	136.9	124.3	131.7	129.6		137	128.533		-0.0576082	0.275015	0.644092		Q4VAA2	Protein CDV3	CDV3_MOUSE	Cdv3	172819	189683	211845	149565	184911	185899		191449	173458		-0.14458	0.106171	0.302948
	ENSMUSG00000059288	chromodomain protein, Y chromosome-like [Source:MGI Symbol;Acc:MGI:1339956]	Cdyl	25.4	23.4	25.4	21.9	23	21.4		24.7333	22.1		-0.149906	0.0636913	1.86611		Q9WTK2-2	Isoform 2 of Chromodomain Y-like protein	CDYL_MOUSE	Cdyl	3104	3190	3787	2391	2711	2043		3360.33	2381.67		-0.500537	0.0279451	0.0112867
	ENSMUSG00000031758	chromodomain protein, Y chromosome-like 2 [Source:MGI Symbol;Acc:MGI:1923046]	Cdyl2	20.7	20.7	19.6	17.7	17.4	16.2		20.3333	17.1		-0.229544	0.0350182	2.35629		Q9D5D8	Chromodomain Y-like protein 2	CDYL2_MOUSE	Cdyl2	1233	971	851	722	757	870		1018.33	783		-0.366475	0.0377209	0.0607355
	ENSMUSG00000024081	CCAAT/enhancer binding protein zeta [Source:MGI Symbol;Acc:MGI:109386]	Cebpz	92	89.8	96.6	95.5	91.5	94.8		92.8	93.9333		0.00774259	0.527552	0.0637956		P53569	CCAAT/enhancer-binding protein zeta	CEBPZ_MOUSE	Cebpz	23575	18995	19048	15700	17801	17054		20539.3	16851.7		-0.279895	0.0351258	0.0528787
	ENSMUSG00000062691	CCAAT/enhancer binding protein (C/EBP), zeta, opposite strand [Source:MGI Symbol;Acc:MGI:1915804]	Cebpzos	33	32.7	30.8	30.9	34.4	33.3		32.1667	32.8667		0.104562	0.303852	0.560885		Q8BTE5	Protein CEBPZOS	CEBOS_MOUSE	Cebpzos	5560	4132	4717	4123	4555	4528		4803	4402		-0.116592	0.130066	0.395206
	ENSMUSG00000005506	CUGBP, Elav-like family member 1 [Source:MGI Symbol;Acc:MGI:1342295]	Celf1	86.5	69.2	76	94.4	74.1	77.7		77.2333	82.0667		0.0354801	0.437501	0.240935		P28659-4	Isoform 4 of CUGBP Elav-like family member 1	CELF1_MOUSE	Celf1	31569	38653	38663	32368	33917	30982		36295	32422.3		-0.157345	0.0782784	0.197721
	ENSMUSG00000002107	CUGBP, Elav-like family member 2 [Source:MGI Symbol;Acc:MGI:1338822]	Celf2	49.3	44.3	48.8	53.9	48.1	46.2		47.4667	49.4		0.0168384	0.479362	0.158242		Q9Z0H4-11	Isoform 11 of CUGBP Elav-like family member 2	CELF2_MOUSE	Celf2	108518	117918	119045	100520	110820	103747		115160	105029		-0.132818	0.0677216	0.159773
	ENSMUSG00000024754	cell migration inducing hyaluronidase 2 [Source:MGI Symbol;Acc:MGI:1890373]	Cemip2	33.6	28.9	32.4	25.5	24.5	28.7		31.6333	26.2333		-0.255178	0.0629638	1.87502		Q5FWI3	Cell surface hyaluronidase	CEIP2_MOUSE	Cemip2	1507	970	533	385	440	503		1003.33	442.667		-1.06427	0.0288244	0.0291663
	ENSMUSG00000029177	centromere protein A [Source:MGI Symbol;Acc:MGI:88375]	Cenpa	81	81.8	80.6	90.9	80.7	78.3		81.1333	83.3		0.00960874	0.526296	0.0659215		O35216	Histone H3-like centromeric protein A	CENPA_MOUSE	Cenpa	10599	72926	69855	12225	11748	10818		51126.7	11597		-1.70635	0.0390148	0.0645722
	ENSMUSG00000029253	centromere protein C1 [Source:MGI Symbol;Acc:MGI:99700]	Cenpc1	31.8	30.8	34	37.6	33	32.6		32.2	34.4		0.0379312	0.377179	0.374745		P49452	Centromere protein C	CENPC_MOUSE	Cenpc	3299	4484	3936	4319	4150	3794		3906.33	4087.67		0.074661	0.177385	0.593539
	ENSMUSG00000045328	centromere protein E [Source:MGI Symbol;Acc:MGI:1098230]	Cenpe	92.9	90.6	99.4	105.5	92.1	90.9		94.3	96.1667		-0.0281592	0.456578	0.200841		Q6RT24	Centromere-associated protein E	CENPE_MOUSE	Cenpe	2240	2085	2478	1645	2216	2051		2267.67	1970.67		-0.210116	0.0732668	0.179244
	ENSMUSG00000026605	centromere protein F [Source:MGI Symbol;Acc:MGI:1313302]	Cenpf	34.3	33.1	36.7	48.5	38.6	35.4		34.7	40.8333		0.124143	0.153746	1.13532		E9Q3P4	Centromere protein F	E9Q3P4_MOUSE	Cenpf	667	654	557	547	548	559		626	551.333		-0.178697	0.0529917	0.110313
	ENSMUSG00000045273	centromere protein H [Source:MGI Symbol;Acc:MGI:1349448]	Cenph	47.9	47.1	51.8	61.9	51.4	56.6		48.9333	56.6333		0.146103	0.130856	1.27024		Q9QYM8	Centromere protein H	CENPH_MOUSE	Cenph	11002	13722	6847	7766	6305	6501		10523.7	6857.33		-0.566418	0.0419183	0.074517
	ENSMUSG00000031262	centromere protein I [Source:MGI Symbol;Acc:MGI:2147897]	Cenpi	21.4	21.1	21.4	25.7	22.7	21.7		21.3	23.3667		0.0967859	0.16781	1.06307		Q8K1K4	Centromere protein I	CENPI_MOUSE	Cenpi	493	411	459	437	402	394		454.333	411		-0.142065	0.0793238	0.201301
	ENSMUSG00000021714	centromere protein K [Source:MGI Symbol;Acc:MGI:1926210]	Cenpk	11	11.1	11.5	15.5	12.3	13.7		11.2	13.8333		0.247343	0.0285919	2.52755		Q9ESN5	Centromere protein K	CENPK_MOUSE	Cenpk	2651	2208	1881	1933	1810	1436		2246.67	1726.33		-0.377297	0.0408004	0.0705429
	ENSMUSG00000026708	centromere protein L [Source:MGI Symbol;Acc:MGI:1917704]	Cenpl	18.7	18.3	18.5	24.5	21.7	19.5		18.5	21.9		0.195901	0.0470786	2.11877		Q3U3S3	Centromere protein L	CENPL_MOUSE	Cenpl	318	454	536	563	496	703		436	587.333		0.447683	0.0491465	0.0974037
	ENSMUSG00000068101	centromere protein M [Source:MGI Symbol;Acc:MGI:1913820]	Cenpm	40.1	39.8	44.5	59.4	44.2	42.4		41.4667	48.6667		0.087373	0.348528	0.444857		Q9CQA0	Centromere protein M	CENPM_MOUSE	Cenpm	545	1344	1414	1282	1430	972		1101	1228		0.260932	0.163622	0.533994
	ENSMUSG00000021391	centromere protein P [Source:MGI Symbol;Acc:MGI:1913586]	Cenpp	14.7	16.2	16.7	23.2	17.2	16.7		15.8667	19.0333		0.130203	0.246026	0.734802		Q9CZ92	Centromere protein P	CENPP_MOUSE	Cenpp	1566	1677	934	1779	1913	1850		1392.33	1847.33		0.453322	0.0486508	0.0957302
	ENSMUSG00000023919	centromere protein Q [Source:MGI Symbol;Acc:MGI:1933744]	Cenpq	44.5	51.5	44.4	52.6	52.5	50		46.8	51.7		0.18113	0.065576	1.84218		Q9CPQ5	Centromere protein Q	CENPQ_MOUSE	Cenpq	2377	1220	16481	1781	1720	1625		6692.67	1708.67		-1.08774	0.101315	0.283978
	ENSMUSG00000073705	centromere protein S [Source:MGI Symbol;Acc:MGI:1917178]	Cenps	23	27.3	27.2	33.1	28.7	28.1		25.8333	29.9667		0.146473	0.161559	1.0912		Q9D084	Centromere protein S	CENPS_MOUSE	Cenps	1694	2661	2511	2528	2672	2769		2288.67	2656.33		0.241539	0.0886519	0.235188
	ENSMUSG00000036672	centromere protein T [Source:MGI Symbol;Acc:MGI:2443939]	Cenpt	24	21.2	23.5	27.6	20.4	22.1		22.9	23.3667		-0.0705209	0.35359	0.430947		Q3TJM4	Centromere protein T	CENPT_MOUSE	Cenpt	890	637	697	834	344	744		741.333	640.667		-0.296166	0.140095	0.436342
	ENSMUSG00000031629	centromere protein U [Source:MGI Symbol;Acc:MGI:1919126]	Cenpu	8.3	9	9.5	10.1	8.7	8.6		8.93333	9.13333		-0.0448814	0.438536	0.238264		Q8C4M7	Centromere protein U	CENPU_MOUSE	Cenpu	1919	2113	1673	1800	1680	1621		1901.67	1700.33		-0.156248	0.081129	0.207099
	ENSMUSG00000018509	centromere protein V [Source:MGI Symbol;Acc:MGI:1920389]	Cenpv	25.7	23.6	22.7	25.3	25	26.3		24	25.5333		0.141978	0.14688	1.17302		Q9CXS4	Centromere protein V	CENPV_MOUSE	Cenpv	24522	26372	25676	20246	21061	24685		25523.3	21997.3		-0.21922	0.0417465	0.0735118
	ENSMUSG00000048799	centrosomal protein 120 [Source:MGI Symbol;Acc:MGI:2147298]	Cep120	27	27.5	26.3	29	27	25.7		26.9333	27.2333		0.0123066	0.513616	0.0890629		Q7TSG1;Q7TSG1-2	Centrosomal protein of 120 kDa;Isoform 2 of Centrosomal protein of 120 kDa	CE120_MOUSE	Cep120	1904	1299	1314	1111	1180	1183		1505.67	1158		-0.355768	0.0417776	0.0738871
	ENSMUSG00000061533	centrosomal protein 128 [Source:MGI Symbol;Acc:MGI:1922466]	Cep128	7.6	7.2	7.5	9.2	7.9	7.6		7.43333	8.23333		0.103207	0.130958	1.26958		Q8BI22;Q8BI22-2	Centrosomal protein of 128 kDa;Isoform 2 of Centrosomal protein of 128 kDa	CE128_MOUSE	Cep128	141	165	99	5	130	104		135	79.6667		-1.69683	0.0861917	0.22512
	ENSMUSG00000039781	centrosomal protein 131 [Source:MGI Symbol;Acc:MGI:107440]	Cep131	1.4	1.5	1.2	2	1.2	1.4		1.36667	1.53333		0.109146	0.439417	0.236556		Q62036	Centrosomal protein of 131 kDa	CP131_MOUSE	Cep131	750	92	805	696	686	468		549	616.667		0.669406	0.147021	0.464114
	ENSMUSG00000036403	centrosomal protein 135 [Source:MGI Symbol;Acc:MGI:2681869]	Cep135	16	16.6	17	16.8	16.8	16		16.5333	16.5333		-0.00228744	0.552786	0.015523		Q6P5D4	Centrosomal protein of 135 kDa	CP135_MOUSE	Cep135	47	207	2	3	63	42		85.3333	36		-0.431172	0.230066	0.834003
	ENSMUSG00000068394	centrosomal protein 152 [Source:MGI Symbol;Acc:MGI:2139083]	Cep152	20.1	17.9	18	24	18.7	17.1		18.6667	19.9333		0.0187749	0.502839	0.110669		A2AUM9	Centrosomal protein of 152 kDa	CE152_MOUSE	Cep152	833	671	665	519	700	621		723	613.333		-0.2401	0.0681645	0.161274
	ENSMUSG00000057335	centrosomal protein 170 [Source:MGI Symbol;Acc:MGI:1918348]	Cep170	10.8	10.1	9.8	8.7	9.9	9.8		10.2333	9.46667		-0.031701	0.440411	0.234063		Q6A065	Centrosomal protein of 170 kDa	CE170_MOUSE	Cep170	1545	1505	1402	1064	1338	1314		1484	1238.67		-0.267105	0.0372313	0.059194
	ENSMUSG00000024542	centrosomal protein 192 [Source:MGI Symbol;Acc:MGI:1918049]	Cep192	43.4	38.5	44.8	47.6	41.3	40.9		42.2333	43.2667		-0.0230195	0.456317	0.20181		E9Q4Y4	Centrosomal protein 192	E9Q4Y4_MOUSE	Cep192	4415	1299	1130	890	987	932		2281.33	936.333		-0.994912	0.0508022	0.102518
	ENSMUSG00000038241	centrosomal protein 250 [Source:MGI Symbol;Acc:MGI:108084]	Cep250	71.2	68.6	72.9	65.5	64.2	61.8		70.9	63.8333		-0.159018	0.0185713	2.84272		Q60952	Centrosome-associated protein CEP250	CP250_MOUSE	Cep250	4753	3978	3655	2817	3130	3094		4128.67	3013.67		-0.446986	0.0279451	0.00983995
	ENSMUSG00000029790	centrosomal protein 41 [Source:MGI Symbol;Acc:MGI:1891414]	Cep41	9.7	9.1	8.8	8.5	7.9	8.1		9.2	8.16667		-0.148132	0.172838	1.03453		Q99NF3	Centrosomal protein of 41 kDa	CEP41_MOUSE	Cep41	2414	2595	2771	2032	2257	2113		2593.33	2134		-0.280322	0.0279451	0.0203664
	ENSMUSG00000069135	centrosomal protein 43 [Source:MGI Symbol;Acc:MGI:1922546]	Cep43	36.2	36.9	34.2	37.8	37.5	34.9		35.7667	36.7333		0.0664233	0.296197	0.581867		Q66JX5;Q66JX5-2	Centrosomal protein 43;Isoform 2 of Centrosomal protein 43	CEP43_MOUSE	Cep43	2604	2170	3136	2560	2768	2030		2636.67	2452.67		-0.100294	0.178139	0.597081
	ENSMUSG00000024989	centrosomal protein 55 [Source:MGI Symbol;Acc:MGI:1921357]	Cep55	89	89.4	96	110.5	93.9	98.8		91.4667	101.067		0.0873014	0.204587	0.884798		Q8BT07	Centrosomal protein of 55 kDa	CEP55_MOUSE	Cep55	28442	28648	31091	25573	28250	27897		29393.7	27240		-0.109991	0.0890216	0.236607
	ENSMUSG00000031922	centrosomal protein 57 [Source:MGI Symbol;Acc:MGI:1915551]	Cep57	57.6	53.7	59.1	66.4	59.7	60.8		56.8	62.3		0.0974561	0.135493	1.23894		Q8CEE0;Q8CEE0-2	Centrosomal protein of 57 kDa;Isoform 2 of Centrosomal protein of 57 kDa	CEP57_MOUSE	Cep57	3656	3504	3258	3212	3178	2986		3472.67	3125.33		-0.15115	0.0547804	0.116497
	ENSMUSG00000032534	centrosomal protein 63 [Source:MGI Symbol;Acc:MGI:2158560]	Cep63	8.5	8.9	8.8	8.7	9.2	9.2		8.73333	9.03333		0.0813282	0.243929	0.740496		Q3UPP8;Q3UPP8-3	Centrosomal protein of 63 kDa;Isoform 3 of Centrosomal protein of 63 kDa	CEP63_MOUSE	Cep63	4443	4062	6075	4957	5212	4028		4860	4732.33		-0.0250803	0.242974	0.896098
	ENSMUSG00000073542	centrosomal protein 76 [Source:MGI Symbol;Acc:MGI:1923401]	Cep76	32.9	31.6	31.7	30.9	34.6	31.1		32.0667	32.2		0.0520082	0.348141	0.445859		Q0VEJ0	Centrosomal protein of 76 kDa	CEP76_MOUSE	Cep76	791	1055	1304	726	787	819		1050	777.333		-0.405841	0.0419717	0.0747532
	ENSMUSG00000037443	centrosomal protein 85 [Source:MGI Symbol;Acc:MGI:1917262]	Cep85	36.7	35.9	36.8	37	32.5	33.4		36.4667	34.3		-0.117823	0.0709957	1.77847		Q8BMK0	Centrosomal protein of 85 kDa	CEP85_MOUSE	Cep85	3529	2822	1356	1702	2185	2292		2569	2059.67		-0.221288	0.170975	0.565669
	ENSMUSG00000022604	centrosomal protein 97 [Source:MGI Symbol;Acc:MGI:1921451]	Cep97	8	6.4	7.3	10.8	7.2	7.5		7.23333	8.5		0.0910875	0.338365	0.469089		Q9CZ62	Centrosomal protein of 97 kDa	CEP97_MOUSE	Cep97	2720	3424	3341	3008	3122	2457		3161.67	2862.33		-0.143799	0.116875	0.344371
	ENSMUSG00000040774	choline/ethanolaminephosphotransferase 1 [Source:MGI Symbol;Acc:MGI:2139793]	Cept1	50.2	45	46.5	47.1	47.9	48.7		47.2333	47.9		0.0581344	0.293133	0.589928		Q8BGS7;Q8BGS7-2	Choline/ethanolaminephosphotransferase 1;Isoform 2 of Choline/ethanolaminephosphotransferase 1	CEPT1_MOUSE	Cept1	12640	11489	14583	11439	12263	12379		12904	12027		-0.0954565	0.135474	0.417944
	ENSMUSG00000015714	ceramide synthase 2 [Source:MGI Symbol;Acc:MGI:1924143]	Cers2	192.4	201	194	158.4	180.5	175.8		195.8	171.567		-0.131569	0.0581268	1.94233		Q924Z4	Ceramide synthase 2	CERS2_MOUSE	Cers2	21275	28031	25628	16482	19959	19040		24978	18493.7		-0.42898	0.0279451	0.0193771
	ENSMUSG00000008206	ceramide synthase 4 [Source:MGI Symbol;Acc:MGI:1914510]	Cers4	6.5	6.5	6.6	7.6	7.5	6		6.53333	7.03333		0.0654091	0.353017	0.43238		Q9D6J1	Ceramide synthase 4	CERS4_MOUSE	Cers4	1349	1255	1344	1085	1207	1212		1316	1168		-0.1732	0.0452988	0.0855621
	ENSMUSG00000023021	ceramide synthase 5 [Source:MGI Symbol;Acc:MGI:1919199]	Cers5	85.2	83.9	84	92.4	88.5	82.8		84.3667	87.9		0.0530174	0.260873	0.685197		Q9D6K9	Ceramide synthase 5	CERS5_MOUSE	Cers5	10084	8665	6975	4768	5501	5630		8574.67	5299.67		-0.681725	0.0279451	0.00468994
	ENSMUSG00000021669	ceramide transporter 1 [Source:MGI Symbol;Acc:MGI:1915268]	Cert1	57.2	52	54.3	53	48.9	51.9		54.5	51.2667		-0.0861727	0.176422	1.01752		Q9EQG9	Ceramide transfer protein	CERT_MOUSE	Cert1	36709	32807	39087	26030	32724	35714		36201	31489.3		-0.209937	0.0769687	0.193402
	ENSMUSG00000031347	centrin 2 [Source:MGI Symbol;Acc:MGI:1347085]	Cetn2	87.6	93.5	90.7	92.6	92.4	97.6		90.6	94.2		0.0802999	0.258438	0.693566		Q9R1K9	Centrin-2	CETN2_MOUSE	Cetn2	32045	32741	31600	24837	29631	28332		32128.7	27600		-0.223031	0.0350199	0.0525517
	ENSMUSG00000021537	centrin 3 [Source:MGI Symbol;Acc:MGI:1097706]	Cetn3	83.8	91	93	91.2	95.5	91.2		89.2667	92.6333		0.0594746	0.327736	0.496444		O35648	Centrin-3	CETN3_MOUSE	Cetn3	9145	9191	8921	7256	8706	9564		9085.67	8508.67		-0.103871	0.133826	0.410149
	ENSMUSG00000031796	cilia and flagella associated protein 20 [Source:MGI Symbol;Acc:MGI:107428]	Cfap20	25	24.9	25.1	27.4	28.8	25		25	27.0667		0.125788	0.0989957	1.50476		Q8BTU1	Cilia- and flagella-associated protein 20	CFA20_MOUSE	Cfap20	28121	27251	25057	22765	24579	24070		26809.7	23804.7		-0.170564	0.0452988	0.0855401
	ENSMUSG00000020462	cilia and flagella associated protein 36 [Source:MGI Symbol;Acc:MGI:1913994]	Cfap36	34.2	34	37	34.5	36.4	34.3		35.0667	35.0667		0.0009423	0.558145	0.00503189		Q8C6E0	Cilia- and flagella-associated protein 36	CFA36_MOUSE	Cfap36	6568	5841	5995	4518	5167	4318		6134.67	4667.67		-0.396685	0.0279451	0.00796039
	ENSMUSG00000031954	craniofacial development protein 1 [Source:MGI Symbol;Acc:MGI:1344403]	Cfdp1	281.8	296.4	281.9	289.7	298.5	286.4		286.7	291.533		0.0527607	0.342162	0.459568		O88271	Craniofacial development protein 1	CFDP1_MOUSE	Cfdp1	38882	40516	48959	41234	43181	41605		42785.7	42006.7		-0.0193934	0.236362	0.864104
	ENSMUSG00000056201	cofilin 1, non-muscle [Source:MGI Symbol;Acc:MGI:101757]	Cfl1	2226.5	2320.9	2255.5	2409.1	2346.6	2300.7		2267.63	2352.13		0.059397	0.247953	0.729169		P18760	Cofilin-1	COF1_MOUSE	Cfl1	12222116	11040859	10986619	9411087	10123882	9569610		1.14165e+07	9.70153e+06		-0.233789	0.0289062	0.0303013
	ENSMUSG00000001128	complement factor properdin [Source:MGI Symbol;Acc:MGI:97545]	Cfp	41.6	44.3	37.7	12.4	21.1	23.6		41.2	19.0333		-0.896456	0.000786208	5.82232		P11680	Properdin	PROP_MOUSE	Cfp	540	813	811	78	459	543		721.333	360		-1.39831	0.0536302	0.112797
	ENSMUSG00000032344	cyclic GMP-AMP synthase [Source:MGI Symbol;Acc:MGI:2442261]	Cgas	23.5	21.6	23.5	26	24	23.4		22.8667	24.4667		0.0716165	0.2643	0.675229		Q8C6L5	Cyclic GMP-AMP synthase	CGAS_MOUSE	Cgas	6090	6887	5673	5735	6391	6097		6216.67	6074.33		-0.030165	0.218443	0.776673
	ENSMUSG00000054604	CGG triplet repeat binding protein 1 [Source:MGI Symbol;Acc:MGI:2146370]	Cggbp1	108.6	105.4	109.4	123.9	107.3	112.3		107.8	114.5		0.0526696	0.256704	0.699951		Q8BHG9	CGG triplet repeat-binding protein 1	CGBP1_MOUSE	Cggbp1	78815	62975	80377	74407	77179	69300		74055.7	73628.7		-0.00117671	0.262385	0.992499
	ENSMUSG00000002835	chromatin assembly factor 1, subunit A (p150) [Source:MGI Symbol;Acc:MGI:1351331]	Chaf1a	43.8	41.6	44.8	52.2	44.4	44.6		43.4	47.0667		0.0615008	0.226215	0.798559		Q9QWF0	Chromatin assembly factor 1 subunit A	CAF1A_MOUSE	Chaf1a	14057	13704	13664	11741	12065	11966		13808.3	11924		-0.211647	0.0279451	0.0215336
	ENSMUSG00000022945	chromatin assembly factor 1, subunit B (p60) [Source:MGI Symbol;Acc:MGI:1314881]	Chaf1b	48.6	52.3	51.5	59.3	51.1	51.2		50.8	53.8667		0.0409163	0.402543	0.318232		Q9D0N7	Chromatin assembly factor 1 subunit B	CAF1B_MOUSE	Chaf1b	21153	19913	17309	15612	16527	43156		19458.3	25098.3		0.203649	0.185734	0.62986
	ENSMUSG00000047710	chromosome alignment maintaining phosphoprotein 1 [Source:MGI Symbol;Acc:MGI:1196398]	Champ1	55.4	58	57.1	64.5	60.7	55.7		56.8333	60.3		0.0644471	0.24955	0.724909		Q8K327	Chromosome alignment-maintaining phosphoprotein 1	CHAP1_MOUSE	Champ1	5248	4517	5221	4795	4891	4727		4995.33	4804.33		-0.0529579	0.173247	0.575371
	ENSMUSG00000063787	coiled-coil-helix-coiled-coil-helix domain containing 1 [Source:MGI Symbol;Acc:MGI:1913371]	Chchd1	184.1	195.4	185.4	205.5	212.5	184.2		188.3	200.733		0.105376	0.212745	0.849836		Q9CQA6	Coiled-coil-helix-coiled-coil-helix domain-containing protein 1	CHCH1_MOUSE	Chchd1	7311	8093	8468	7686	8226	8069		7957.33	7993.67		0.00868311	0.248899	0.924356
	ENSMUSG00000053768	coiled-coil-helix-coiled-coil-helix domain containing 3 [Source:MGI Symbol;Acc:MGI:1913325]	Chchd3	100.2	112.1	108.3	111.6	111	108		106.867	110.2		0.0492091	0.321702	0.512858		Q9CRB9	MICOS complex subunit Mic19	MIC19_MOUSE	Chchd3	59803	58485	65277	53145	59006	55091		61188.3	55747.3		-0.134082	0.0704494	0.169535
	ENSMUSG00000034203	coiled-coil-helix-coiled-coil-helix domain containing 4 [Source:MGI Symbol;Acc:MGI:1919420]	Chchd4	27.9	26.5	27.7	25	25	28		27.3667	26		-0.0441973	0.423992	0.271392		Q8VEA4	Mitochondrial intermembrane space import and assembly protein 40	MIA40_MOUSE	Chchd4	27304	23514	29316	14415	24426	16141		26711.3	18327.3		-0.575867	0.0304008	0.0366461
	ENSMUSG00000030086	coiled-coil-helix-coiled-coil-helix domain containing 6 [Source:MGI Symbol;Acc:MGI:1913348]	Chchd6	11.8	13	11.2	13.6	10.9	12.3		12	12.2667		0.0266108	0.511981	0.0923606		Q91VN4	MICOS complex subunit Mic25	MIC25_MOUSE	Chchd6	17751	3824	4433	3910	22661	3711		8669.33	10094		0.0426407	0.257034	0.964188
	ENSMUSG00000023852	chromodomain helicase DNA binding protein 1 [Source:MGI Symbol;Acc:MGI:88393]	Chd1	67.3	62	66.1	70	66.6	62		65.1333	66.2		0.00601624	0.53711	0.0446302		P40201	Chromodomain-helicase-DNA-binding protein 1	CHD1_MOUSE	Chd1	5693	5434	5197	4467	4872	4764		5441.33	4701		-0.210963	0.0310086	0.0388223
	ENSMUSG00000028089	chromodomain helicase DNA binding protein 1-like [Source:MGI Symbol;Acc:MGI:1915308]	Chd1l	48.9	49.5	48.8	54.1	51.4	50.4		49.0667	51.9667		0.0821323	0.177543	1.01215		Q9CXF7	Chromodomain-helicase-DNA-binding protein 1-like	CHD1L_MOUSE	Chd1l	6929	6216	5467	4653	5190	5234		6204	5025.67		-0.299191	0.0312761	0.0396367
	ENSMUSG00000078671	chromodomain helicase DNA binding protein 2 [Source:MGI Symbol;Acc:MGI:2448567]	Chd2	30.1	30.2	28.4	29.2	29.2	27.2		29.5667	28.5333		-0.0262951	0.460004	0.194518		E9PZM4	Chromodomain-helicase-DNA-binding protein 2	CHD2_MOUSE	Chd2	2521	1758	1767	1446	1511	1653		2015.33	1536.67		-0.372192	0.0382282	0.0623245
	ENSMUSG00000018474	chromodomain helicase DNA binding protein 3 [Source:MGI Symbol;Acc:MGI:1344395]	Chd3	57.4	51.2	57.5	61.1	51.1	51.1		55.3667	54.4333		-0.0872008	0.173106	1.03257		B1AR17	Chromodomain helicase DNA-binding protein 3	B1AR17_MOUSE	Chd3	21734	21930	19969	17991	18889	18165		21211	18348.3		-0.208213	0.0304149	0.0367315
	ENSMUSG00000063870	chromodomain helicase DNA binding protein 4 [Source:MGI Symbol;Acc:MGI:1344380]	Chd4	250.9	244.3	259.4	249.1	240.6	225.9		251.533	238.533		-0.0937222	0.0961883	1.53407		Q6PDQ2	Chromodomain-helicase-DNA-binding protein 4	CHD4_MOUSE	Chd4	75764	77261	78591	68762	73033	71003		77205.3	70932.7		-0.122526	0.0606982	0.136296
	ENSMUSG00000041235	chromodomain helicase DNA binding protein 7 [Source:MGI Symbol;Acc:MGI:2444748]	Chd7	42	38.3	37.8	47	40.9	37.1		39.3667	41.6667		0.0499542	0.327045	0.49851		A2AJK6	Chromodomain-helicase-DNA-binding protein 7	CHD7_MOUSE	Chd7	7318	5802	6560	1403	5558	1092		6560	2684.33		-1.67721	0.0293117	0.0326166
	ENSMUSG00000053754	chromodomain helicase DNA binding protein 8 [Source:MGI Symbol;Acc:MGI:1915022]	Chd8	36	33.2	36.1	38.5	33.4	33.1		35.1	35		-0.0516964	0.30794	0.548714		Q09XV5	Chromodomain-helicase-DNA-binding protein 8	CHD8_MOUSE	Chd8	5658	5609	5931	4723	5521	5099		5732.67	5114.33		-0.167155	0.0519385	0.106357
	ENSMUSG00000032113	checkpoint kinase 1 [Source:MGI Symbol;Acc:MGI:1202065]	Chek1	27.7	28.2	29.5	43.3	31.9	31.4		28.4667	35.5333		0.198771	0.0320695	2.42537		O35280;O35280-2	Serine/threonine-protein kinase Chk1;Isoform 2 of Serine/threonine-protein kinase Chk1	CHK1_MOUSE	Chek1	5608	5757	6401	6389	6320	6099		5922	6269.33		0.0843288	0.119537	0.353918
	ENSMUSG00000052488	calcium homeostasis endoplasmic reticulum protein [Source:MGI Symbol;Acc:MGI:106417]	Cherp	104.3	98.6	103.3	123.6	99.4	100.4		102.067	107.8		0.0110491	0.513616	0.0890717		Q8CGZ0	Calcium homeostasis endoplasmic reticulum protein	CHERP_MOUSE	Cherp	58837	47961	57965	42888	41973	42229		54921	42363.3		-0.368499	0.0279451	0.011669
	ENSMUSG00000014668	checkpoint with forkhead and ring finger domains [Source:MGI Symbol;Acc:MGI:2444898]	Chfr	64.1	63.2	66.3	66.5	62.5	63.4		64.5333	64.1333		-0.0241307	0.431674	0.253527		Q810L3;Q810L3-2;Q810L3-3;Q810L3-4	E3 ubiquitin-protein ligase CHFR;Isoform 2 of E3 ubiquitin-protein ligase CHFR;Isoform 3 of E3 ubiquitin-protein ligase CHFR;Isoform 4 of E3 ubiquitin-protein ligase CHFR	CHFR_MOUSE	Chfr	1024	854	814	575	701	680		897.333	652		-0.458966	0.0279451	0.0119372
	ENSMUSG00000025512	chitinase domain containing 1 [Source:MGI Symbol;Acc:MGI:1915288]	Chid1	7.3	7.8	7	5.2	6.4	6.6		7.36667	6.06667		-0.163987	0.138836	1.21729		Q922Q9	Chitinase domain-containing protein 1	CHID1_MOUSE	Chid1	2268	1873	2909	1723	2090	2350		2350	2054.33		-0.182069	0.12878	0.389463
	ENSMUSG00000025531	choroidermia (RAB escort protein 1) [Source:MGI Symbol;Acc:MGI:892979]	Chm	25.7	27.4	27	26.3	28.1	27.2		26.7	27.2		0.0559801	0.29827	0.576658		Q9QXG2	Rab proteins geranylgeranyltransferase component A 1	RAE1_MOUSE	Chm	12163	9086	8509	6319	6888	6752		9919.33	6653		-0.559322	0.0279451	0.00955507
	ENSMUSG00000000743	charged multivesicular body protein 1A [Source:MGI Symbol;Acc:MGI:1920159]	Chmp1a	88.7	89.7	91.3	92.1	88.1	88.3		89.9	89.5		-0.0118186	0.507478	0.100218		Q921W0	Charged multivesicular body protein 1a	CHM1A_MOUSE	Chmp1a	23533	28675	31172	23137	27035	26067		27793.3	25413		-0.122492	0.128175	0.387071
	ENSMUSG00000109901	charged multivesicular body protein 1B [Source:MGI Symbol;Acc:MGI:1914314]	Chmp1b	59.8	57.6	58.6	65.7	57.9	59.3		58.6667	60.9667		0.0336929	0.39763	0.328187		Q99LU0	Charged multivesicular body protein 1b-1	CH1B1_MOUSE	Chmp1b1	14745	15958	18105	15884	16217	16355		16269.3	16152		-0.00536029	0.255685	0.958098
	ENSMUSG00000033916	charged multivesicular body protein 2A [Source:MGI Symbol;Acc:MGI:1916203]	Chmp2a	271.5	287.9	274.3	295	295.2	286.7		277.9	292.3		0.0915321	0.205074	0.883255		Q9DB34	Charged multivesicular body protein 2a	CHM2A_MOUSE	Chmp2a	56868	50036	55057	47826	50152	41777		53987	46585		-0.214899	0.0446675	0.0834196
	ENSMUSG00000004843	charged multivesicular body protein 2B [Source:MGI Symbol;Acc:MGI:1916192]	Chmp2b	48.2	49.4	53.1	51.9	52.2	50.3		50.2333	51.4667		0.0200012	0.499051	0.121061		Q8BJF9	Charged multivesicular body protein 2b	CHM2B_MOUSE	Chmp2b	9380	9275	1028	7301	7613	1579		6561	5497.67		-0.00906838	0.26249	0.993471
	ENSMUSG00000053119	charged multivesicular body protein 3 [Source:MGI Symbol;Acc:MGI:1913950]	Chmp3	78.1	73.9	75	75.7	79.5	79.2		75.6667	78.1333		0.0847942	0.169992	1.05038		Q9CQ10	Charged multivesicular body protein 3	CHMP3_MOUSE	Chmp3	19198	19858	20762	15594	18265	16559		19939.3	16806		-0.248978	0.0294706	0.0331849
	ENSMUSG00000038467	charged multivesicular body protein 4B [Source:MGI Symbol;Acc:MGI:1922858]	Chmp4b	376.4	413.5	404.9	374.3	411.5	385.5		398.267	390.433		0.00251198	0.551452	0.017882		Q9D8B3	Charged multivesicular body protein 4b	CHM4B_MOUSE	Chmp4b	136788	138265	153776	114835	128207	130475		142943	124506		-0.199466	0.0422742	0.0759633
	ENSMUSG00000028419	charged multivesicular body protein 5 [Source:MGI Symbol;Acc:MGI:1924209]	Chmp5	130.2	133.9	126	108.6	124.8	126.4		130.033	119.933		-0.0376333	0.419295	0.28166		Q9D7S9	Charged multivesicular body protein 5	CHMP5_MOUSE	Chmp5	30190	28641	27975	19827	24292	23141		28935.3	22420		-0.372631	0.0279451	0.0107717
	ENSMUSG00000025371	charged multivesicular body protein 6 [Source:MGI Symbol;Acc:MGI:3583942]	Chmp6	49.8	51.4	52.9	55.4	51.7	55.5		51.3667	54.2		0.0661207	0.335343	0.476923		P0C0A3	Charged multivesicular body protein 6	CHMP6_MOUSE	Chmp6	5639	5611	9818	6110	6382	8346		7022.67	6946		0.0223798	0.250611	0.933294
	ENSMUSG00000034190	charged multivesicular body protein 7 [Source:MGI Symbol;Acc:MGI:1913922]	Chmp7	19.8	19.4	21.3	21.1	18.4	19.7		20.1667	19.7333		-0.0801135	0.234415	0.77253		Q8R1T1	Charged multivesicular body protein 7	CHMP7_MOUSE	Chmp7	8881	6956	7344	4813	6742	5212		7727	5589		-0.474532	0.0285578	0.0269856
	ENSMUSG00000001774	cysteine and histidine-rich domain (CHORD)-containing, zinc-binding protein 1 [Source:MGI Symbol;Acc:MGI:1914167]	Chordc1	38.6	36.9	37.9	40.2	39	38.8		37.8	39.3333		0.0631283	0.194431	0.933547		Q9D1P4	Cysteine and histidine-rich domain-containing protein 1	CHRD1_MOUSE	Chordc1	169485	169315	193158	141395	164002	158478		177319	154625		-0.197641	0.0484588	0.0951179
	ENSMUSG00000014077	calcineurin-like EF hand protein 1 [Source:MGI Symbol;Acc:MGI:1927185]	Chp1	89.7	88.3	90.9	90	84.7	85.7		89.6333	86.8		-0.0556166	0.2643	0.675009		P61022	Calcineurin B homologous protein 1	CHP1_MOUSE	Chp1	14077	13632	12719	8571	10388	9825		13476	9594.67		-0.493447	0.0279451	0.00283367
	ENSMUSG00000068391	chromatin accessibility complex 1 [Source:MGI Symbol;Acc:MGI:2135796]	Chrac1	38	43.1	41.8	44.7	44.5	43.6		40.9667	44.2667		0.11368	0.182727	0.986234		Q9JKP8	Chromatin accessibility complex protein 1	CHRC1_MOUSE	Chrac1	22621	22453	24884	22250	23299	21617		23319.3	22388.7		-0.0578499	0.157053	0.505753
	ENSMUSG00000036599	carbohydrate sulfotransferase 12 [Source:MGI Symbol;Acc:MGI:1929064]	Chst12	54.8	50	57.7	49.8	46.4	47.2		54.1667	47.8		-0.215311	0.0637719	1.86453		Q99LL3	Carbohydrate sulfotransferase 12	CHSTC_MOUSE	Chst12	63183	49294	305	30994	34947	31046		37594	32329		1.71522	0.139884	0.435455
	ENSMUSG00000032640	chondroitin sulfate synthase 1 [Source:MGI Symbol;Acc:MGI:2681120]	Chsy1	384.1	387.6	395.6	310.6	367.5	353.5		389.1	343.867		-0.120318	0.119196	1.34449		Q6ZQ11	Chondroitin sulfate synthase 1	CHSS1_MOUSE	Chsy1	2364	2935	2395	2641	4105	5167		2564.67	3971		0.584392	0.0382282	0.0623875
	ENSMUSG00000019214	CTF18, chromosome transmission fidelity factor 18 [Source:MGI Symbol;Acc:MGI:2384887]	Chtf18	21.7	21	21.7	26.8	23.2	20		21.4667	23.3333		0.0523246	0.388595	0.347707		Q8BIW9	Chromosome transmission fidelity protein 18 homolog	CTF18_MOUSE	Chtf18	10479	8971	8721	7673	8556	8100		9390.33	8109.67		-0.208181	0.0458954	0.0875476
	ENSMUSG00000046691	CTF8, chromosome transmission fidelity factor 8 [Source:MGI Symbol;Acc:MGI:2443370]	Chtf8	1	0.7	0.6	0.9	0.8	0.8		0.766667	0.833333		0.1653	0.416355	0.288189		P0CG15	Chromosome transmission fidelity protein 8 homolog	CTF8_MOUSE	Chtf8	9423	8248	7265	7219	6706	7345		8312	7090		-0.222393	0.0511092	0.103567
	ENSMUSG00000001017	chromatin target of PRMT1 [Source:MGI Symbol;Acc:MGI:1913761]	Chtop	160.1	160.4	161.7	187.3	175.8	166.8		160.733	176.633		0.11983	0.0313793	2.44174		Q9CY57;Q9CY57-2;Q9CY57-3;Q9CY57-4;Q9CY57-5	Chromatin target of PRMT1 protein;Isoform 2 of Chromatin target of PRMT1 protein;Isoform 3 of Chromatin target of PRMT1 protein;Isoform 4 of Chromatin target of PRMT1 protein;Isoform 5 of Chromatin target of PRMT1 protein	CHTOP_MOUSE	Chtop	38451	45711	53635	45449	48751	47038		45932.3	47079.3		0.0482566	0.20843	0.730912
	ENSMUSG00000025199	conserved helix-loop-helix ubiquitous kinase [Source:MGI Symbol;Acc:MGI:99484]	Chuk	90.3	85.7	88.2	78.6	83.3	83		88.0667	81.6333		-0.0737899	0.162425	1.08747		Q60680	Inhibitor of nuclear factor kappa-B kinase subunit alpha	IKKA_MOUSE	Chuk	7226	5725	5612	3963	4773	4743		6187.67	4493		-0.457233	0.0279451	0.0158641
	ENSMUSG00000090258	churchill domain containing 1 [Source:MGI Symbol;Acc:MGI:1923684]	Churc1	3.1	3.6	3.8	3	3.3	3.4		3.5	3.23333		-0.097626	0.360161	0.414961		Q6DG52	Protein Churchill	CHUR_MOUSE	Churc1	46366	47892	51028	38195	48406	45635		48428.7	44078.7		-0.14181	0.0935402	0.254457
	ENSMUSG00000003662	cytosolic iron-sulfur protein assembly 1 [Source:MGI Symbol;Acc:MGI:1346998]	Ciao1	28.5	30.5	29.2	34.7	29.1	35.4		29.4	33.0667		0.154177	0.136951	1.23105		Q99KN2	Probable cytosolic iron-sulfur protein assembly protein CIAO1	CIAO1_MOUSE	Ciao1	20879	21583	21188	15517	16447	17452		21216.7	16472		-0.36671	0.0279451	0.00354295
	ENSMUSG00000032381	cytosolic iron-sulfur assembly component 2A [Source:MGI Symbol;Acc:MGI:1915500]	Ciao2a	284.6	300.2	306	281.8	297.9	295.1		296.933	291.6		-0.00576204	0.544397	0.0301682		Q9DCL2	Cytosolic iron-sulfur assembly component 2A	CIA2A_MOUSE	Ciao2a	8956	8573	7773	5957	8125	6925		8434	7002.33		-0.277453	0.0451853	0.0850795
	ENSMUSG00000031879	cytosolic iron-sulfur assembly component 2B [Source:MGI Symbol;Acc:MGI:1915773]	Ciao2b	88.6	94.5	95.1	83.5	93.3	87.9		92.7333	88.2333		-0.0397093	0.431676	0.253482		Q9D187	Cytosolic iron-sulfur assembly component 2B	CIA2B_MOUSE	Ciao2b	9099	8764	8261	6961	8573	4897		8708	6810.33		-0.390874	0.0522667	0.10786
	ENSMUSG00000002280	cytosolic iron-sulfur assembly component 3 [Source:MGI Symbol;Acc:MGI:1914813]	Ciao3	8.8	7.4	8.7	9.2	7.5	7.8		8.3	8.16667		-0.0896658	0.281072	0.625596		Q7TMW6;Q7TMW6-2	Cytosolic iron-sulfur assembly component 3;Isoform 2 of Cytosolic iron-sulfur assembly component 3	CIAO3_MOUSE	Ciao3	2698	3737	2528	1898	2405	2687		2987.67	2330		-0.351751	0.0578938	0.127272
	ENSMUSG00000031781	cytokine induced apoptosis inhibitor 1 [Source:MGI Symbol;Acc:MGI:1922083]	Ciapin1	20.1	20.2	19.3	20.7	18.3	18.9		19.8667	19.3		-0.0453139	0.36773	0.396454		Q8WTY4	Anamorsin	CPIN1_MOUSE	Ciapin1	58689	52255	50303	41103	46602	43395		53749	43700		-0.29738	0.0279451	0.0217914
	ENSMUSG00000030538	calcium and integrin binding 1 (calmyrin) [Source:MGI Symbol;Acc:MGI:1344418]	Cib1	54.1	58.4	58.2	58.2	64.9	60.8		56.9	61.3		0.140035	0.124027	1.31159		Q9Z0F4	Calcium and integrin-binding protein 1	CIB1_MOUSE	Cib1	12768	10833	9921	6601	8345	7305		11174	7417		-0.589942	0.0279451	0.00494439
	ENSMUSG00000005442	capicua transcriptional repressor [Source:MGI Symbol;Acc:MGI:1918972]	Cic	40.7	40.7	43.1	45.1	39.8	35.5		41.5	40.1333		-0.112892	0.0981502	1.51024		Q924A2	Protein capicua homolog	CIC_MOUSE	Cic	1053	801	825	529	603	625		893	585.667		-0.601116	0.0279451	0.00453082
	ENSMUSG00000021276	cyclin-dependent kinase 2 interacting protein [Source:MGI Symbol;Acc:MGI:1914486]	Cinp	52.2	49.5	51.5	44.1	48.6	48.3		51.0667	47		-0.0741938	0.2643	0.675173		Q9D0V8;Q9D0V8-2;Q9D0V8-3	Cyclin-dependent kinase 2-interacting protein;Isoform 2 of Cyclin-dependent kinase 2-interacting protein;Isoform 3 of Cyclin-dependent kinase 2-interacting protein	CINP_MOUSE	Cinp	631	657	636	468	566	639		641.333	557.667		-0.213145	0.0634063	0.144634
	ENSMUSG00000033031	cell proliferation regulating inhibitor of protein phosphatase 2A [Source:MGI Symbol;Acc:MGI:2146335]	Cip2a	78.9	75.4	79.2	102.3	82.3	86.1		77.8333	90.2333		0.149303	0.0583811	1.93763		Q8BWY9	Protein CIP2A	CIP2A_MOUSE	Cip2a	29643	22068	29210	22656	26834	26292		26973.7	25260.7		-0.0858435	0.17388	0.577853
	ENSMUSG00000045193	cold inducible RNA binding protein [Source:MGI Symbol;Acc:MGI:893588]	Cirbp	60.4	60.5	66.7	90.3	68.4	65.6		62.5333	74.7667		0.127685	0.136957	1.22973		P60824	Cold-inducible RNA-binding protein	CIRBP_MOUSE	Cirbp	56425	47451	49744	47529	46307	41553		51206.7	45129.7		-0.180768	0.0585495	0.129419
	ENSMUSG00000037710	CDGSH iron sulfur domain 1 [Source:MGI Symbol;Acc:MGI:1261855]	Cisd1	140.9	149.5	157.2	143.1	147.2	140.6		149.2	143.633		-0.0602736	0.330574	0.489705		Q91WS0	CDGSH iron-sulfur domain-containing protein 1	CISD1_MOUSE	Cisd1	209922	207340	206683	140502	184099	165177		207982	163259		-0.358062	0.0279451	0.020494
	ENSMUSG00000028165	CDGSH iron sulfur domain 2 [Source:MGI Symbol;Acc:MGI:1914256]	Cisd2	22.5	21.4	21.8	23.5	20.9	21.7		21.9	22.0333		-0.00475086	0.541186	0.0368782		Q9CQB5	CDGSH iron-sulfur domain-containing protein 2	CISD2_MOUSE	Cisd2	77415	68195	80303	59357	65964	66786		75304.3	64035.7		-0.232363	0.0367754	0.0579611
	ENSMUSG00000078695	CDGSH iron sulfur domain 3 [Source:MGI Symbol;Acc:MGI:101788]	Cisd3	133.4	119.4	115.7	88.5	106	104.7		122.833	99.7333		-0.192299	0.0786065	1.70068		B1AR13	CDGSH iron-sulfur domain-containing protein 3, mitochondrial	CISD3_MOUSE	Cisd3	5965	6704	8191	2103	3991	3223		6953.33	3105.67		-1.19933	0.0279451	0.00344711
	ENSMUSG00000032578	cytokine inducible SH2-containing protein [Source:MGI Symbol;Acc:MGI:103159]	Cish	253.8	257.4	243.5	248.7	233	216.8		251.567	232.833		-0.115363	0.114864	1.38		Q62225	Cytokine-inducible SH2-containing protein	CISH_MOUSE	Cish	9737	11113	13510	8003	10308	9489		11453.3	9266.67		-0.300373	0.0516503	0.105399
	ENSMUSG00000029516	citron [Source:MGI Symbol;Acc:MGI:105313]	Cit	16.9	15	17.5	21	15.7	14.9		16.4667	17.2		-0.0711541	0.344805	0.453742		P49025-5	Isoform 5 of Citron Rho-interacting kinase	CTRO_MOUSE	Cit	6002	5751	6243	5648	6083	5811		5998.67	5847.33		-0.0367287	0.190232	0.650221
	ENSMUSG00000039205	CDKN1A interacting zinc finger protein 1 [Source:MGI Symbol;Acc:MGI:1920234]	Ciz1	23.9	23.1	22.3	30.5	23.4	21.2		23.1	25.0333		0.0278936	0.466923	0.180321		Q8VEH2	CDKN1A-interacting zinc finger protein 1	Q8VEH2_MOUSE	Ciz1	1645	2022	1023	1739	2175	2022		1563.33	1978.67		0.38946	0.0746301	0.183858
	ENSMUSG00000037725	cytoskeleton associated protein 2 [Source:MGI Symbol;Acc:MGI:1931797]	Ckap2	67.9	62.1	67.2	79.6	64	70.2		65.7333	71.2667		0.0588329	0.34286	0.458465		Q3V1H1	Cytoskeleton-associated protein 2	CKAP2_MOUSE	Ckap2	6272	4399	5667	5303	4498	4696		5446	4832.33		-0.160387	0.11413	0.334658
	ENSMUSG00000048327	cytoskeleton associated protein 2-like [Source:MGI Symbol;Acc:MGI:1917716]	Ckap2l	105.4	98.1	107	140.7	108.9	111.7		103.5	120.433		0.129096	0.0986891	1.50713		Q7TS74;Q7TS74-2	Cytoskeleton-associated protein 2-like;Isoform 2 of Cytoskeleton-associated protein 2-like	CKP2L_MOUSE	Ckap2l	442	434	718	741	771	479		531.333	663.667		0.330168	0.0981629	0.272677
	ENSMUSG00000040549	cytoskeleton associated protein 5 [Source:MGI Symbol;Acc:MGI:1923036]	Ckap5	101	97.9	105.7	124.4	105.7	102.2		101.533	110.767		0.0599274	0.260473	0.687197		A2AGT5;A2AGT5-3	Cytoskeleton-associated protein 5;Isoform 3 of Cytoskeleton-associated protein 5	CKAP5_MOUSE	Ckap5	63791	59989	62732	51210	57020	57492		62170.7	55240.7		-0.171999	0.0448173	0.0839176
	ENSMUSG00000001270	creatine kinase, brain [Source:MGI Symbol;Acc:MGI:88407]	Ckb	6.2	6.8	8.2	8.9	8.9	8.2		7.06667	8.66667		0.223349	0.217274	0.833732		Q04447	Creatine kinase B-type	KCRB_MOUSE	Ckb	9351	9029	10415	7047	9260	8961		9598.33	8422.67		-0.196199	0.0754336	0.187478
	ENSMUSG00000028044	CDC28 protein kinase 1b [Source:MGI Symbol;Acc:MGI:1889208]	Cks1b	296.6	311.7	311.6	388.5	329	333.4		306.633	350.3		0.142387	0.0851856	1.63017		P61025	Cyclin-dependent kinases regulatory subunit 1	CKS1_MOUSE	Cks1b	19156	20588	23486	20981	18379	20179		21076.7	19846.3		-0.0838016	0.147558	0.466176
	ENSMUSG00000062248	CDC28 protein kinase regulatory subunit 2 [Source:MGI Symbol;Acc:MGI:1913447]	Cks2	215.8	220.4	233.8	244.4	252.6	244.7		223.333	247.233		0.147812	0.0948861	1.54534		P56390	Cyclin-dependent kinases regulatory subunit 2	CKS2_MOUSE	Cks2	20802	21097	25623	24250	22611	20441		22507.3	22434		-0.00157473	0.261888	0.989893
	ENSMUSG00000064302	CLIP associating protein 1 [Source:MGI Symbol;Acc:MGI:1923957]	Clasp1	11.8	10.6	12	12.1	11	10.8		11.4667	11.3		-0.0636553	0.292155	0.592455		Q80TV8;Q80TV8-2	CLIP-associating protein 1;Isoform 2 of CLIP-associating protein 1	CLAP1_MOUSE	Clasp1	8653	8940	8961	7013	7979	7869		8851.33	7620.33		-0.218238	0.0315966	0.0403371
	ENSMUSG00000061028	CLK4-associating serine/arginine rich protein [Source:MGI Symbol;Acc:MGI:1855695]	Clasrp	18	16.5	17.9	17.6	15.4	14.8		17.4667	15.9333		-0.179646	0.0646099	1.85499		Q8CFC7;Q8CFC7-2;Q8CFC7-3	CLK4-associating serine/arginine rich protein;Isoform 2 of CLK4-associating serine/arginine rich protein;Isoform 3 of CLK4-associating serine/arginine rich protein	CLASR_MOUSE	Clasrp	354	437	436	453	468	395		409	438.667		0.104054	0.138429	0.428885
	ENSMUSG00000027884	chloride channel CLIC-like 1 [Source:MGI Symbol;Acc:MGI:2385186]	Clcc1	34	30.8	32.4	30.3	32.5	30.9		32.4	31.2333		-0.017568	0.4873	0.143039		Q99LI2	Chloride channel CLIC-like protein 1	CLCC1_MOUSE	Clcc1	8904	7126	9793	7409	7845	7577		8607.67	7610.33		-0.165539	0.0935304	0.254326
	ENSMUSG00000004319	chloride channel, voltage-sensitive 3 [Source:MGI Symbol;Acc:MGI:103555]	Clcn3	22.5	20.2	22.9	24.6	21.9	22.3		21.8667	22.9333		0.0265713	0.453332	0.207312		P51791;P51791-2	H(+)/Cl(-) exchange transporter 3;Isoform 2 of H(+)/Cl(-) exchange transporter 3	CLCN3_MOUSE	Clcn3	2744	2944	3060	2312	2620	2312		2916	2414.67		-0.273247	0.0283413	0.0243092
	ENSMUSG00000004317	chloride channel, voltage-sensitive 5 [Source:MGI Symbol;Acc:MGI:99486]	Clcn5	12.2	11.4	12.9	11.1	11	11.1		12.1667	11.0667		-0.151761	0.106988	1.43488		Q9WVD4	H(+)/Cl(-) exchange transporter 5	CLCN5_MOUSE	Clcn5	1933	1712	1247	869	1095	1109		1630.67	1024.33		-0.655789	0.0279451	0.014424
	ENSMUSG00000022744	claudin domain containing 1 [Source:MGI Symbol;Acc:MGI:2447860]	Cldnd1	107.9	96.4	108.2	126.9	109.2	127.2		104.167	121.1		0.186032	0.0723605	1.76199		Q9CQX5	Claudin domain-containing protein 1	CLDN1_MOUSE	Cldnd1	6952	8395	7135	4720	6390	6149		7494	5753		-0.388972	0.0312	0.039489
	ENSMUSG00000030157	C-type lectin domain family 2, member d [Source:MGI Symbol;Acc:MGI:2135589]	Clec2d	100	82.2	86.1	81.9	76.2	91.6		89.4333	83.2333		-0.0617068	0.394874	0.334385		Q91V08	C-type lectin domain family 2 member D	CLC2D_MOUSE	Clec2d	17582	16630	17492	14331	14823	14438		17234.7	14530.7		-0.245912	0.0279451	0.013699
	ENSMUSG00000007041	chloride intracellular channel 1 [Source:MGI Symbol;Acc:MGI:2148924]	Clic1	1081.5	1205.1	1150.3	1162.2	1193.1	1198.5		1145.63	1184.6		0.0721938	0.251126	0.71852		Q9Z1Q5	Chloride intracellular channel protein 1	CLIC1_MOUSE	Clic1	1856446	1837931	2122826	1533765	1754824	1709186		1.93907e+06	1665925		-0.2183	0.0408004	0.0704351
	ENSMUSG00000037242	chloride intracellular channel 4 (mitochondrial) [Source:MGI Symbol;Acc:MGI:1352754]	Clic4	153.3	161.7	157.2	132.9	151.4	144.4		157.4	142.9		-0.0871295	0.190238	0.9518		Q9QYB1	Chloride intracellular channel protein 4	CLIC4_MOUSE	Clic4	170330	162357	140532	98316	124660	117437		157740	113471		-0.477672	0.0279451	0.00956979
	ENSMUSG00000006169	clathrin interactor 1 [Source:MGI Symbol;Acc:MGI:2144243]	Clint1	71	71.7	73.4	75.6	71.5	69.8		72.0333	72.3		-0.00955409	0.525407	0.0676846		Q99KN9	Clathrin interactor 1	EPN4_MOUSE	Clint1	38064	38864	45441	38854	42004	37846		40789.7	39568		-0.0407085	0.201804	0.701046
	ENSMUSG00000049550	CAP-GLY domain containing linker protein 1 [Source:MGI Symbol;Acc:MGI:1928401]	Clip1	31.7	30.7	33.1	35.4	32.4	31.5		31.8333	33.1		0.0214833	0.452831	0.208839		Q922J3	CAP-Gly domain-containing linker protein 1	CLIP1_MOUSE	Clip1	31356	17071	18027	14159	15181	14786		22151.3	14708.7		-0.534077	0.0399979	0.0678642
	ENSMUSG00000026034	CDC-like kinase 1 [Source:MGI Symbol;Acc:MGI:107403]	Clk1	39.8	32.8	34.8	42.1	32.5	33.4		35.8	36		-0.0483391	0.419702	0.280669		P22518	Dual specificity protein kinase CLK1	CLK1_MOUSE	Clk1	1279	1247	771	567	784	781		1099	710.667		-0.60818	0.0330361	0.0455039
	ENSMUSG00000032316	CDC-like kinase 3 [Source:MGI Symbol;Acc:MGI:1098670]	Clk3	39.1	39.2	36.3	38.9	33.7	33.5		38.2	35.3667		-0.123359	0.0813006	1.66928		O35492	Dual specificity protein kinase CLK3	CLK3_MOUSE	Clk3	8715	7764	8247	6310	7045	7253		8242	6869.33		-0.263784	0.0288244	0.0291857
	ENSMUSG00000022125	ceroid-lipofuscinosis, neuronal 5 [Source:MGI Symbol;Acc:MGI:2442253]	Cln5	39.9	36.7	39.7	39.3	37.3	37.2		38.7667	37.9333		-0.042968	0.404643	0.313057		Q3UMW8	Ceroid-lipofuscinosis neuronal protein 5 homolog	CLN5_MOUSE	Cln5	2599	2281	2167	1594	1969	2013		2349	1858.67		-0.341287	0.0304599	0.0369008
	ENSMUSG00000025439	chloride channel, nucleotide-sensitive, 1A [Source:MGI Symbol;Acc:MGI:109638]	Clns1a	91.8	93.8	95.7	100.4	102.3	98.2		93.7667	100.3		0.105198	0.143784	1.19056		Q61189	Methylosome subunit pICln	ICLN_MOUSE	Clns1a	103774	103398	84608	72850	86484	73436		97260	77590		-0.324151	0.0310827	0.0391534
	ENSMUSG00000027079	CLP1, cleavage and polyadenylation factor I subunit [Source:MGI Symbol;Acc:MGI:2138968]	Clp1	38.8	38.3	40.6	44.3	40	40		39.2333	41.4333		0.0402779	0.378339	0.371783		Q99LI9	Polyribonucleotide 5'-hydroxyl-kinase Clp1	CLP1_MOUSE	Clp1	14991	13795	13858	11912	12833	11386		14214.7	12043.7		-0.239809	0.0289062	0.0302385
	ENSMUSG00000001829	ClpB caseinolytic peptidase B [Source:MGI Symbol;Acc:MGI:1100517]	Clpb	9.9	10.9	10.5	11.9	11	10.2		10.4333	11.0333		0.0547475	0.344247	0.454703		Q60649	Caseinolytic peptidase B protein homolog	CLPB_MOUSE	Clpb	9982	11148	9789	8457	5893	6397		10306.3	6915.67		-0.590887	0.0279451	0.00840908
	ENSMUSG00000002660	caseinolytic mitochondrial matrix peptidase proteolytic subunit [Source:MGI Symbol;Acc:MGI:1858213]	Clpp	80.7	84.3	89.4	80.9	79.2	86.4		84.8	82.1667		-0.0504558	0.409705	0.303617		O88696	ATP-dependent Clp protease proteolytic subunit, mitochondrial	CLPP_MOUSE	Clpp	25960	24900	29151	24270	27419	21581		26670.3	24423.3		-0.130623	0.10937	0.315847
	ENSMUSG00000002981	cleft lip and palate associated transmembrane protein 1 [Source:MGI Symbol;Acc:MGI:1927155]	Clptm1	75.6	77.7	79.7	77	77.7	76.6		77.6667	77.1		-0.00377689	0.543778	0.0314548		Q8VBZ3	Cleft lip and palate transmembrane protein 1 homolog	CLPT1_MOUSE	Clptm1	23050	25364	27063	19062	22473	22990		25159	21508.3		-0.227991	0.04555	0.0864398
	ENSMUSG00000021610	CLPTM1-like [Source:MGI Symbol;Acc:MGI:2442892]	Clptm1l	221.5	215.9	221.1	179.8	197.4	201.9		219.5	193.033		-0.137997	0.0491402	2.07615		Q8BXA5	Cleft lip and palate transmembrane protein 1-like protein	CLP1L_MOUSE	Clptm1l	8250	5114	4595	3170	3960	4484		5986.33	3871.33		-0.594714	0.0364442	0.0570016
	ENSMUSG00000015357	caseinolytic mitochondrial matrix peptidase chaperone subunit [Source:MGI Symbol;Acc:MGI:1346017]	Clpx	44.7	44.9	49.9	40.1	46.7	45		46.5	43.9333		-0.0552243	0.352256	0.434818		Q9JHS4	ATP-dependent Clp protease ATP-binding subunit clpX-like, mitochondrial	CLPX_MOUSE	Clpx	32531	33519	41144	30688	31222	24760		35731.3	28890		-0.306409	0.0415282	0.0726213
	ENSMUSG00000042489	claspin [Source:MGI Symbol;Acc:MGI:2445153]	Clspn	73.9	71.2	79.9	99.1	81.3	80.2		75	86.8667		0.12626	0.0850222	1.63258		Q80YR7	Claspin	CLSPN_MOUSE	Clspn	1180	1365	1462	1479	1464	1416		1335.67	1453		0.126909	0.0942869	0.257676
	ENSMUSG00000028478	clathrin, light polypeptide (Lca) [Source:MGI Symbol;Acc:MGI:894297]	Clta	325.1	335.3	340	359.4	343.3	354.5		333.467	352.4		0.07649	0.16943	1.05348		O08585	Clathrin light chain A	CLCA_MOUSE	Clta	95688	99531	121426	88300	97530	92843		105548	92891		-0.177479	0.0715271	0.173656
	ENSMUSG00000047547	clathrin, light polypeptide (Lcb) [Source:MGI Symbol;Acc:MGI:1921575]	Cltb	20.8	23.3	22.3	20.3	22.1	21.5		22.1333	21.3		-0.0168945	0.509625	0.0961522		Q6IRU5-2	Isoform 2 of Clathrin light chain B	CLCB_MOUSE	Cltb	17895	16346	19166	14191	17570	14826		17802.3	15529		-0.200275	0.0598778	0.134027
	ENSMUSG00000047126	clathrin, heavy polypeptide (Hc) [Source:MGI Symbol;Acc:MGI:2388633]	Cltc	283.8	277	276.4	232.1	251.1	251.3		279.067	244.833		-0.141821	0.0565374	1.96901		Q68FD5	Clathrin heavy chain 1	CLH1_MOUSE	Cltc	440357	401916	406186	287082	346601	329660		416153	321114		-0.37733	0.0279451	0.00946342
	ENSMUSG00000020741	clustered mitochondria (cluA/CLU1) homolog [Source:MGI Symbol;Acc:MGI:1921398]	Cluh	94	89.3	96.2	96.7	88	86.1		93.1667	90.2667		-0.0785624	0.169774	1.05129		Q5SW19	Clustered mitochondria protein homolog	CLU_MOUSE	Cluh	28876	26781	28651	21033	24725	23858		28102.7	23205.3		-0.278856	0.0283184	0.0241129
	ENSMUSG00000025545	citrate lyase beta like [Source:MGI Symbol;Acc:MGI:1916884]	Clybl	16.8	15.7	15	18.8	18.8	17.8		15.8333	18.4667		0.26971	0.0612049	1.90058		Q8R4N0	Citramalyl-CoA lyase, mitochondrial	CLYBL_MOUSE	Clybl	5656	4871	6631	6425	7136	6801		5719.33	6787.33		0.257111	0.0483837	0.0948646
	ENSMUSG00000016756	cytidine monophospho-N-acetylneuraminic acid hydroxylase [Source:MGI Symbol;Acc:MGI:103227]	Cmah	3.7	2.9	3.1	7.9	3.8	3.9		3.23333	5.2		0.38779	0.11508	1.37783		Q61419;Q61419-2	Cytidine monophosphate-N-acetylneuraminic acid hydroxylase;Isoform 2 of Cytidine monophosphate-N-acetylneuraminic acid hydroxylase	CMAH_MOUSE	Cmah	7	68	153	577	241	211		76	343		2.88474	0.0333057	0.0465794
	ENSMUSG00000030282	cytidine monophospho-N-acetylneuraminic acid synthetase [Source:MGI Symbol;Acc:MGI:1337124]	Cmas	94	96.2	98.6	78	91.9	91.4		96.2667	87.1		-0.0865409	0.191476	0.945881		Q99KK2	N-acylneuraminate cytidylyltransferase	NEUA_MOUSE	Cmas	76319	75916	79068	50152	65857	65114		77101	60374.3		-0.363643	0.0285578	0.0275177
	ENSMUSG00000039163	COX assembly mitochondrial protein 1 [Source:MGI Symbol;Acc:MGI:1915149]	Cmc1	57.8	61.7	62.3	59.4	57.6	62.7		60.6	59.9		-0.0115366	0.526144	0.066414		Q9CPZ8	COX assembly mitochondrial protein homolog	COXM1_MOUSE	Cmc1	24817	26240	27334	22529	23848	21623		26130.3	22666.7		-0.205192	0.0332892	0.0463315
	ENSMUSG00000014633	COX assembly mitochondrial protein 2 [Source:MGI Symbol;Acc:MGI:1913781]	Cmc2	33.6	34.1	34.3	38.2	28.7	33.7		34	33.5333		-0.0903131	0.326192	0.500894		Q8K199	COX assembly mitochondrial protein 2 homolog	COXM2_MOUSE	Cmc2	17933	17635	16521	13094	13707	11403		17363	12734.7		-0.450709	0.0279451	0.00374999
	ENSMUSG00000034390	c-Maf inducing protein [Source:MGI Symbol;Acc:MGI:1921690]	Cmip	54	51.8	54.7	49.2	49.9	44.8		53.5	47.9667		-0.160633	0.0258516	2.59385		Q9D486;Q9D486-2	C-Maf-inducing protein;Isoform 2 of C-Maf-inducing protein	CMIP_MOUSE	Cmip	2121	2614	1326	905	1401	1367		2020.33	1224.33		-0.694875	0.0369182	0.0583928
	ENSMUSG00000028719	cytidine monophosphate (UMP-CMP) kinase 1 [Source:MGI Symbol;Acc:MGI:1913838]	Cmpk1	150	153.2	152.3	127.7	144.1	148.8		151.833	140.2		-0.0567219	0.327736	0.496424		Q9DBP5	UMP-CMP kinase	KCY_MOUSE	Cmpk1	335328	333998	312323	198003	249793	266566		327216	238121		-0.469234	0.0279451	0.010844
	ENSMUSG00000020638	cytidine monophosphate (UMP-CMP) kinase 2, mitochondrial [Source:MGI Symbol;Acc:MGI:99830]	Cmpk2	6.7	5.8	7	12.2	7.4	7.7		6.5	9.1		0.258624	0.137094	1.22901		Q3U5Q7	UMP-CMP kinase 2, mitochondrial	CMPK2_MOUSE	Cmpk2	923	266	972	1303	1173	1050		720.333	1175.33		0.9165	0.0566384	0.122434
	ENSMUSG00000022748	cms small ribosomal subunit 1 [Source:MGI Symbol;Acc:MGI:1913747]	Cmss1	39	40.6	41.4	51.9	46.6	42		40.3333	46.8333		0.16248	0.079645	1.68822		Q9CZT6	Protein CMSS1	CMS1_MOUSE	Cmss1	18946	18466	19478	19817	18260	16790		18963.3	18289		-0.0551942	0.169805	0.560219
	ENSMUSG00000032434	CKLF-like MARVEL transmembrane domain containing 6 [Source:MGI Symbol;Acc:MGI:2447165]	Cmtm6	178.8	175.6	182.5	189.3	186.1	178.2		178.967	184.533		0.0403512	0.317479	0.523589		Q9CZ69	CKLF-like MARVEL transmembrane domain-containing protein 6	CKLF6_MOUSE	Cmtm6	30832	33163	24701	18315	23476	24121		29565.3	21970.7		-0.428023	0.0308683	0.0382195
	ENSMUSG00000032436	CKLF-like MARVEL transmembrane domain containing 7 [Source:MGI Symbol;Acc:MGI:2447166]	Cmtm7	229.9	227.5	235	227.3	229.1	229.6		230.8	228.667		-0.00091645	0.55734	0.00634323		Q9ESD6;Q9ESD6-2	CKLF-like MARVEL transmembrane domain-containing protein 7;Isoform 2 of CKLF-like MARVEL transmembrane domain-containing protein 7	CKLF7_MOUSE	Cmtm7	54817	52269	55571	40078	49452	42906		54219	44145.3		-0.301631	0.0283715	0.0250453
	ENSMUSG00000024019	cap methyltransferase 1 [Source:MGI Symbol;Acc:MGI:1921407]	Cmtr1	2.6	1.8	1.9	1.9	1.7	1.5		2.1	1.7		-0.264321	0.14255	1.1979		Q9DBC3	Cap-specific mRNA (nucleoside-2'-O-)-methyltransferase 1	CMTR1_MOUSE	Cmtr1	29660	28934	27312	22985	25728	24850		28635.3	24521		-0.224514	0.0300123	0.0353087
	ENSMUSG00000030057	cellular nucleic acid binding protein [Source:MGI Symbol;Acc:MGI:88431]	Cnbp	801.9	858	851	866.1	867.5	858.6		836.967	864.067		0.0542681	0.355713	0.425554		P53996	Cellular nucleic acid-binding protein	CNBP_MOUSE	Cnbp	389871	298003	385869	220035	274192	220740		357914	238322		-0.583722	0.0279451	0.00823092
	ENSMUSG00000024644	CNDP dipeptidase 2 (metallopeptidase M20 family) [Source:MGI Symbol;Acc:MGI:1913304]	Cndp2	280.5	280.5	294.8	323.4	289.9	299.5		285.267	304.267		0.0617045	0.205664	0.881474		Q9D1A2	Cytosolic non-specific dipeptidase	CNDP2_MOUSE	Cndp2	791435	770371	815106	668925	701475	725097		792304	698499		-0.182201	0.034575	0.0513651
	ENSMUSG00000036810	CTD nuclear envelope phosphatase 1 regulatory subunit 1 [Source:MGI Symbol;Acc:MGI:1921981]	Cnep1r1	34.5	34.6	34.7	40	36.3	33.5		34.6	36.6		0.0473374	0.352256	0.434459		Q3UJ81	Nuclear envelope phosphatase-regulatory subunit 1	NEPR1_MOUSE	Cnep1r1	8136	10213	5830	6277	6968	7096		8059.67	6780.33		-0.214108	0.116779	0.344023
	ENSMUSG00000004665	calponin 2 [Source:MGI Symbol;Acc:MGI:105093]	Cnn2	545.7	560	572	615.8	549.5	559.8		559.233	575.033		0.00897619	0.521767	0.073693		Q08093	Calponin-2	CNN2_MOUSE	Cnn2	323068	279959	299058	249815	272651	254907		300695	259124		-0.213197	0.035147	0.053012
	ENSMUSG00000001138	cyclin M3 [Source:MGI Symbol;Acc:MGI:2151055]	Cnnm3	7.8	6.9	7.1	9.8	7	7.2		7.26667	8		0.0404193	0.472149	0.170345		Q32NY4;Q32NY4-2	Metal transporter CNNM3;Isoform 2 of Metal transporter CNNM3	CNNM3_MOUSE	Cnnm3	524	476	420	388	428	401		473.333	405.667		-0.217883	0.0457974	0.087135
	ENSMUSG00000036550	CCR4-NOT transcription complex, subunit 1 [Source:MGI Symbol;Acc:MGI:2442402]	Cnot1	85.3	82.5	88.2	90.5	83.5	81.5		85.3333	85.1667		-0.0312138	0.386068	0.352754		Q6ZQ08;Q6ZQ08-4	CCR4-NOT transcription complex subunit 1;Isoform 4 of CCR4-NOT transcription complex subunit 1	CNOT1_MOUSE	Cnot1	40586	38532	38383	31178	34305	32290		39167	32591		-0.265824	0.0279451	0.0141633
	ENSMUSG00000056167	CCR4-NOT transcription complex, subunit 10 [Source:MGI Symbol;Acc:MGI:1926143]	Cnot10	39	38.1	38.6	43	39.7	37.9		38.5667	40.2		0.0412281	0.327279	0.497718		Q8BH15	CCR4-NOT transcription complex subunit 10	CNO10_MOUSE	Cnot10	15636	14808	15861	12007	13434	12827		15435	12756		-0.275928	0.0279451	0.0145561
	ENSMUSG00000003135	CCR4-NOT transcription complex, subunit 11 [Source:MGI Symbol;Acc:MGI:106580]	Cnot11	59.3	60.1	60.4	69.4	64.9	61.3		59.9333	65.2		0.101402	0.0966794	1.52588		Q9CWN7	CCR4-NOT transcription complex subunit 11	CNO11_MOUSE	Cnot11	6334	9413	6298	5228	5954	6270		7348.33	5817.33		-0.314694	0.0602732	0.135077
	ENSMUSG00000020166	CCR4-NOT transcription complex, subunit 2 [Source:MGI Symbol;Acc:MGI:1919318]	Cnot2	108.9	108.9	109.1	109.9	105.7	108.4		108.967	108		-0.00621894	0.530315	0.0584158		Q8C5L3;Q8C5L3-2	CCR4-NOT transcription complex subunit 2;Isoform 2 of CCR4-NOT transcription complex subunit 2	CNOT2_MOUSE	Cnot2	18050	20404	21711	17494	20257	18647		20055	18799.3		-0.0916842	0.135444	0.417778
	ENSMUSG00000035632	CCR4-NOT transcription complex, subunit 3 [Source:MGI Symbol;Acc:MGI:2385261]	Cnot3	58.3	55.8	59	62.2	52.3	54.4		57.7	56.3		-0.085781	0.145905	1.17794		Q8K0V4	CCR4-NOT transcription complex subunit 3	CNOT3_MOUSE	Cnot3	13958	14207	15820	12837	13776	12749		14661.7	13120.7		-0.158865	0.0546687	0.116034
	ENSMUSG00000038784	CCR4-NOT transcription complex, subunit 4 [Source:MGI Symbol;Acc:MGI:1859026]	Cnot4	15.3	14.8	15.5	17.2	15.1	14.3		15.2	15.5333		-0.0211613	0.481097	0.155726		Q8BT14;Q8BT14-2;Q8BT14-3	CCR4-NOT transcription complex subunit 4;Isoform 2 of CCR4-NOT transcription complex subunit 4;Isoform 3 of CCR4-NOT transcription complex subunit 4	CNOT4_MOUSE	Cnot4	8341	5580	5843	4998	5817	4767		6588	5194		-0.324162	0.055828	0.120009
	ENSMUSG00000020362	CCR4-NOT transcription complex, subunit 6 [Source:MGI Symbol;Acc:MGI:2144529]	Cnot6	114.9	107.3	115.4	123.1	114.6	110.3		112.533	116		0.0205359	0.453332	0.207123		Q8K3P5;Q8K3P5-2	CCR4-NOT transcription complex subunit 6;Isoform 2 of CCR4-NOT transcription complex subunit 6	CNOT6_MOUSE	Cnot6	1465	1450	1421	917	1912	1070		1445.33	1299.67		-0.228724	0.139519	0.433633
	ENSMUSG00000034724	CCR4-NOT transcription complex, subunit 6-like [Source:MGI Symbol;Acc:MGI:2443154]	Cnot6l	36.7	32	33.7	44.1	35.3	35.4		34.1333	38.2667		0.108619	0.143929	1.1895		Q8VEG6;Q8VEG6-2	CCR4-NOT transcription complex subunit 6-like;Isoform 2 of CCR4-NOT transcription complex subunit 6-like	CNO6L_MOUSE	Cnot6l	3770	4390	3630	3317	3418	3341		3930	3358.67		-0.221815	0.0379051	0.0613168
	ENSMUSG00000031601	CCR4-NOT transcription complex, subunit 7 [Source:MGI Symbol;Acc:MGI:1298230]	Cnot7	61.7	60.3	62.2	56.9	58.7	59.7		61.4	58.4333		-0.0477557	0.307918	0.548905		Q60809	CCR4-NOT transcription complex subunit 7	CNOT7_MOUSE	Cnot7	12400	12024	15084	10084	11664	10465		13169.3	10737.7		-0.289858	0.0345198	0.0509572
	ENSMUSG00000020515	CCR4-NOT transcription complex, subunit 8 [Source:MGI Symbol;Acc:MGI:1916375]	Cnot8	72.2	70.6	72.4	82.5	77.5	75.4		71.7333	78.4667		0.116362	0.0576427	1.9491		Q9D8X5	CCR4-NOT transcription complex subunit 8	CNOT8_MOUSE	Cnot8	18753	15590	15665	13005	13898	14018		16669.3	13640.3		-0.284688	0.0291707	0.0317515
	ENSMUSG00000026174	CCR4-NOT transcription complex, subunit 9 [Source:MGI Symbol;Acc:MGI:1928902]	Cnot9	127.6	122.9	128.4	144.6	135.8	136.3		126.3	138.9		0.125693	0.0404389	2.24623		Q9JKY0	CCR4-NOT transcription complex subunit 9	CNOT9_MOUSE	Cnot9	50092	46623	50397	37542	39871	37515		49037.3	38309.3		-0.355882	0.0279451	0.00364397
	ENSMUSG00000006782	2',3'-cyclic nucleotide 3' phosphodiesterase [Source:MGI Symbol;Acc:MGI:88437]	Cnp	124.6	127	128.1	140.1	126.8	127.9		126.567	131.6		0.033692	0.371323	0.387829		P16330;P16330-2	2',3'-cyclic-nucleotide 3'-phosphodiesterase;Isoform CNPI of 2',3'-cyclic-nucleotide 3'-phosphodiesterase	CN37_MOUSE	Cnp	72768	67713	65351	54575	57851	57978		68610.7	56801.3		-0.27162	0.0279451	0.0148161
	ENSMUSG00000025381	canopy FGF signaling regulator 2 [Source:MGI Symbol;Acc:MGI:1928477]	Cnpy2	71.2	77.5	72.6	75.8	75.7	75.1		73.7667	75.5333		0.0581121	0.334937	0.478216		Q9QXT0	Protein canopy homolog 2	CNPY2_MOUSE	Cnpy2	106662	99482	108628	86311	91197	92440		104924	89982.7		-0.221229	0.0288801	0.0300301
	ENSMUSG00000023973	canopy FGF signaling regulator 3 [Source:MGI Symbol;Acc:MGI:1919279]	Cnpy3	44.9	46.2	47.8	49.2	45.6	45.3		46.3	46.7		-0.0159784	0.498755	0.121603		Q9DAU1	Protein canopy homolog 3	CNPY3_MOUSE	Cnpy3	12824	12314	11932	6757	7993	9890		12356.7	8213.33		-0.606225	0.0279451	0.00651118
	ENSMUSG00000036968	canopy FGF signaling regulator 4 [Source:MGI Symbol;Acc:MGI:1913705]	Cnpy4	24.1	22.9	24.4	21.7	25	23.4		23.8	23.3667		0.0153389	0.518811	0.0798617		Q8BQ47	Protein canopy homolog 4	CNPY4_MOUSE	Cnpy4	9997	8208	8874	6269	7817	7684		9026.33	7256.67		-0.317134	0.0333057	0.0465392
	ENSMUSG00000044629	cannabinoid receptor interacting protein 1 [Source:MGI Symbol;Acc:MGI:1917505]	Cnrip1	4	4.2	3.5	3.2	4.8	4.1		3.9	4.03333		0.251631	0.159671	1.1005		Q5M8N0	CB1 cannabinoid receptor-interacting protein 1	CNRP1_MOUSE	Cnrip1	2526	2068	1648	1504	1755	1791		2080.67	1683.33		-0.288255	0.0639813	0.146856
	ENSMUSG00000038949	consortin, connexin sorting protein [Source:MGI Symbol;Acc:MGI:2445141]	Cnst	23.8	20.6	22.9	22.2	20.2	20		22.4333	20.8		-0.132049	0.0789713	1.6948		Q8CBC4;Q8CBC4-3	Consortin;Isoform 3 of Consortin	CNST_MOUSE	Cnst	472	421	379	265	470	462		424	399		-0.12942	0.182168	0.614576
	ENSMUSG00000057110	centriolin [Source:MGI Symbol;Acc:MGI:1889576]	Cntrl	90.6	85.9	92.2	103.2	88.8	82.1		89.5667	91.3667		-0.0347236	0.377673	0.373784		A2AL36	Centriolin	CNTRL_MOUSE	Cntrl	5745	4050	3445	3335	3599	3038		4413.33	3324		-0.378776	0.0516859	0.10567
	ENSMUSG00000032782	centrobin, centrosomal BRCA2 interacting protein [Source:MGI Symbol;Acc:MGI:2443290]	Cntrob	12.8	11.1	11.4	12.8	10.7	9.8		11.7667	11.1		-0.130109	0.192589	0.940467		Q8CB62;Q8CB62-2	Centrobin;Isoform 2 of Centrobin	CNTRB_MOUSE	Cntrob	827	319	887	258	679	230		677.667	389		-0.845987	0.0751414	0.18565
	ENSMUSG00000017188	cytochrome C oxidase assembly factor 3 [Source:MGI Symbol;Acc:MGI:1098757]	Coa3	109	123.9	114.1	114.7	125.2	120.4		115.667	120.1		0.102497	0.222525	0.813232		Q9D2R6	Cytochrome c oxidase assembly factor 3 homolog, mitochondrial	COA3_MOUSE	Coa3	39509	46381	47751	37844	42761	42346		44547	40983.7		-0.117553	0.109067	0.314496
	ENSMUSG00000051671	cytochrome c oxidase assembly factor 6 [Source:MGI Symbol;Acc:MGI:1915142]	Coa6	27.2	26.9	33.5	27.3	31.7	35.2		29.2	31.4		0.109297	0.365885	0.4005		Q8BGD8	Cytochrome c oxidase assembly factor 6 homolog	COA6_MOUSE	Coa6	10975	8144	9570	8768	9384	9636		9563	9262.67		-0.0365068	0.21944	0.782263
	ENSMUSG00000048351	cytochrome c oxidase assembly factor 7 [Source:MGI Symbol;Acc:MGI:1917143]	Coa7	15.2	15.1	14.8	17.8	16.5	16.4		15.0333	16.9		0.169901	0.107501	1.43101		Q921H9	Cytochrome c oxidase assembly factor 7	COA7_MOUSE	Coa7	41084	33773	46254	40964	44951	48903		40370.3	44939.3		0.162869	0.103259	0.29174
	ENSMUSG00000001755	Coenzyme A synthase [Source:MGI Symbol;Acc:MGI:1918993]	Coasy	30.1	28.5	30.2	28.1	29.2	26.5		29.6	27.9333		-0.0783194	0.23075	0.783289		Q9DBL7	Bifunctional coenzyme A synthase	COASY_MOUSE	Coasy	12752	11981	11521	8902	10458	11208		12084.7	10189.3		-0.251467	0.0385125	0.0631926
	ENSMUSG00000034903	Cobl-like 1 [Source:MGI Symbol;Acc:MGI:2442894]	Cobll1	27.5	25.1	26.7	28.5	27.7	28.3		26.4333	28.1667		0.0985159	0.159361	1.10218		Q3UMF0;Q3UMF0-3	Cordon-bleu protein-like 1;Isoform 3 of Cordon-bleu protein-like 1	COBL1_MOUSE	Cobll1	9337	9926	10768	6636	9556	9634		10010.3	8608.67		-0.235998	0.0812455	0.207663
	ENSMUSG00000018661	component of oligomeric golgi complex 1 [Source:MGI Symbol;Acc:MGI:1333873]	Cog1	26.6	28.9	27.7	26.3	24.8	24.1		27.7333	25.0667		-0.154291	0.070078	1.78925		Q9Z160	Conserved oligomeric Golgi complex subunit 1	COG1_MOUSE	Cog1	10137	11179	8046	9478	9804	9000		9787.33	9427.33		-0.0415572	0.217244	0.770864
	ENSMUSG00000031979	component of oligomeric golgi complex 2 [Source:MGI Symbol;Acc:MGI:1923582]	Cog2	31.3	34.7	34.1	34.7	34	33		33.3667	33.9		0.0175961	0.492286	0.133286		Q921L5	Conserved oligomeric Golgi complex subunit 2	COG2_MOUSE	Cog2	18453	7283	7254	12719	9465	9453		10996.7	10545.7		0.0743983	0.234342	0.85515
	ENSMUSG00000034893	component of oligomeric golgi complex 3 [Source:MGI Symbol;Acc:MGI:2450151]	Cog3	40.6	40.9	42.2	40.9	43.2	38.3		41.2333	40.8		-0.0110052	0.515977	0.085371		Q8CI04	Conserved oligomeric Golgi complex subunit 3	COG3_MOUSE	Cog3	7840	6797	6879	5372	5890	5579		7172	5613.67		-0.351406	0.0279451	0.00867121
	ENSMUSG00000031753	component of oligomeric golgi complex 4 [Source:MGI Symbol;Acc:MGI:2142808]	Cog4	25	23.3	26.1	29.1	22.5	24.4		24.8	25.3333		-0.0607219	0.333585	0.481471		Q8R1U1	Conserved oligomeric Golgi complex subunit 4	COG4_MOUSE	Cog4	5168	4529	4955	4118	4818	4404		4884	4446.67		-0.136164	0.0823523	0.21171
	ENSMUSG00000035933	component of oligomeric golgi complex 5 [Source:MGI Symbol;Acc:MGI:2145130]	Cog5	55.7	51.6	53.3	61.6	58.1	53.9		53.5333	57.8667		0.100378	0.137766	1.22461		Q8C0L8	Conserved oligomeric Golgi complex subunit 5	COG5_MOUSE	Cog5	9246	8582	8244	7149	8385	8396		8690.67	7976.67		-0.126078	0.0936601	0.25506
	ENSMUSG00000027742	component of oligomeric golgi complex 6 [Source:MGI Symbol;Acc:MGI:1914792]	Cog6	22.5	21.3	23.4	21.4	21.1	21.1		22.4	21.2		-0.0894227	0.210297	0.859731		Q8R3I3	Conserved oligomeric Golgi complex subunit 6	COG6_MOUSE	Cog6	7557	18282	10781	7626	12041	12243		12206.7	10636.7		-0.135297	0.206154	0.720141
	ENSMUSG00000034951	component of oligomeric golgi complex 7 [Source:MGI Symbol;Acc:MGI:2685013]	Cog7	9.4	9.2	9.5	9.5	8.6	9.2		9.36667	9.1		-0.0539016	0.365606	0.40111		Q3UM29	Conserved oligomeric Golgi complex subunit 7	COG7_MOUSE	Cog7	5034	3546	4163	3900	4550	5377		4247.67	4609		0.120207	0.160193	0.518711
	ENSMUSG00000031916	component of oligomeric golgi complex 8 [Source:MGI Symbol;Acc:MGI:2142885]	Cog8	17.9	17.5	18.8	21.6	17.8	20		18.0667	19.8		0.0750981	0.292038	0.592845		Q9JJA2	Conserved oligomeric Golgi complex subunit 8	COG8_MOUSE	Cog8	3377	2949	2980	2370	2724	2487		3102	2527		-0.29542	0.0281378	0.0229481
	ENSMUSG00000033983	coilin [Source:MGI Symbol;Acc:MGI:104842]	Coil	23.4	23.3	22.3	26	23.2	24.5		23	24.5667		0.0978391	0.204212	0.887028		Q5SU73	Coilin	COIL_MOUSE	Coil	3852	3004	3333	3009	3137	2530		3396.33	2892		-0.230502	0.0601449	0.134691
	ENSMUSG00000034807	collagen beta(1-O)galactosyltransferase 1 [Source:MGI Symbol;Acc:MGI:1924348]	Colgalt1	77.6	73.4	76.7	85.6	72.4	74.1		75.9	77.3667		-0.0167875	0.482997	0.15119		Q8K297	Procollagen galactosyltransferase 1	GT251_MOUSE	Colgalt1	25421	21997	22268	18070	20135	19248		23228.7	19151		-0.276763	0.0284641	0.0260026
	ENSMUSG00000051355	COMM domain containing 1 [Source:MGI Symbol;Acc:MGI:109474]	Commd1	6.6	7.2	5.3	7.1	6	5.8		6.36667	6.3		0.0552731	0.464465	0.185688		Q8K4M5	COMM domain-containing protein 1	COMD1_MOUSE	Commd1	9814	9619	9654	7090	8177	7671		9695.67	7646		-0.345028	0.0279451	0.00606576
	ENSMUSG00000042705	COMM domain containing 10 [Source:MGI Symbol;Acc:MGI:1916706]	Commd10	18.3	19	18.3	19	18.4	20.2		18.5333	19.2		0.0761582	0.291434	0.595		Q8JZY2	COMM domain-containing protein 10	COMDA_MOUSE	Commd10	16165	16184	17451	13298	15484	14050		16600	14277.3		-0.219398	0.034546	0.0512163
	ENSMUSG00000036513	COMM domain containing 2 [Source:MGI Symbol;Acc:MGI:1098806]	Commd2	32.3	39.1	33.9	37.3	33.9	34.5		35.1	35.2333		0.0134685	0.535173	0.0480219		Q8BXC6	COMM domain-containing protein 2	COMD2_MOUSE	Commd2	48585	38994	39459	27731	32188	32845		42346	30921.3		-0.45014	0.0279451	0.0113191
	ENSMUSG00000051154	COMM domain containing 3 [Source:MGI Symbol;Acc:MGI:88218]	Commd3	129.3	135.4	127.5	119.3	132.1	124.7		130.733	125.367		-0.00619521	0.536571	0.0456824		Q63829	COMM domain-containing protein 3	COMD3_MOUSE	Commd3	44662	39219	33639	22346	31181	20907		39173.3	24811.3		-0.672022	0.0279451	0.0116362
	ENSMUSG00000032299	COMM domain containing 4 [Source:MGI Symbol;Acc:MGI:1913449]	Commd4	41.6	42.7	40.6	44.6	39.4	37.9		41.6333	40.6333		-0.0559073	0.372973	0.382748		Q9CQ02	COMM domain-containing protein 4	COMD4_MOUSE	Commd4	14084	9570	16365	12376	12350	10738		13339.7	11821.3		-0.14216	0.160324	0.519282
	ENSMUSG00000075486	COMM domain containing 6 [Source:MGI Symbol;Acc:MGI:1913450]	Commd6	13.7	13.8	13.3	12	15.3	12.6		13.6	13.3		0.0450474	0.430222	0.257619		Q3V4B5	COMM domain-containing protein 6	COMD6_MOUSE	Commd6	12162	15163	12019	8750	10993	11098		13114.7	10280.3		-0.351338	0.0345277	0.0510946
	ENSMUSG00000056941	COMM domain containing 7 [Source:MGI Symbol;Acc:MGI:1914197]	Commd7	26.1	29.5	28.7	29.8	27.5	28.4		28.1	28.5667		0.00532281	0.544412	0.0299317		Q8BG94	COMM domain-containing protein 7	COMD7_MOUSE	Commd7	2798	2372	2281	2051	2110	1259		2483.67	1806.67		-0.491439	0.0401517	0.0684876
	ENSMUSG00000029213	COMM domain containing 8 [Source:MGI Symbol;Acc:MGI:1343485]	Commd8	54.9	58.8	60.6	57.8	61.3	59.7		58.1	59.6		0.0510205	0.356184	0.424605		Q9CZG3	COMM domain-containing protein 8	COMD8_MOUSE	Commd8	2236	2333	2645	3564	2697	2874		2404.67	3045		0.333846	0.0333453	0.047145
	ENSMUSG00000027163	COMM domain containing 9 [Source:MGI Symbol;Acc:MGI:1923751]	Commd9	32.4	34.2	29	35.2	30.7	31.5		31.8667	32.4667		0.0550146	0.412162	0.297691		Q8K2Q0	COMM domain-containing protein 9	COMD9_MOUSE	Commd9	11955	11265	8895	7721	9179	7329		10705	8076.33		-0.401857	0.0301423	0.0361008
	ENSMUSG00000000326	catechol-O-methyltransferase [Source:MGI Symbol;Acc:MGI:88470]	Comt	61.2	62.7	62.6	56.7	59.1	58.2		62.1667	58		-0.0733798	0.257968	0.694639		O88587;O88587-2	Catechol O-methyltransferase;Isoform Soluble of Catechol O-methyltransferase	COMT_MOUSE	Comt	57621	38642	37519	32359	37884	29112		44594	33118.3		-0.409005	0.0451263	0.0848695
	ENSMUSG00000021773	catechol-O-methyltransferase domain containing 1 [Source:MGI Symbol;Acc:MGI:1916406]	Comtd1	13.5	12	15.2	15.6	13.3	12.1		13.5667	13.6667		-0.110285	0.307372	0.550523		Q8BIG7	Catechol O-methyltransferase domain-containing protein 1	CMTD1_MOUSE	Comtd1	25823	24586	15502	17272	20927	20384		21970.3	19527.7		-0.139237	0.165232	0.541644
	ENSMUSG00000026553	coatomer protein complex subunit alpha [Source:MGI Symbol;Acc:MGI:1334462]	Copa	152.9	157.7	154.6	149.2	154.7	147.8		155.067	150.567		-0.0190207	0.462533	0.189472		Q8CIE6	Coatomer subunit alpha	COPA_MOUSE	Copa	191897	180534	177959	127279	152431	151278		183463	143663		-0.356932	0.0279451	0.0120337
	ENSMUSG00000030754	coatomer protein complex, subunit beta 1 [Source:MGI Symbol;Acc:MGI:1917599]	Copb1	129.4	139.8	138.9	126.5	140.2	133.7		136.033	133.467		0.00669667	0.532721	0.0533521		Q9JIF7	Coatomer subunit beta	COPB_MOUSE	Copb1	199037	177239	173021	122796	142123	141420		183099	135446		-0.43543	0.0279451	0.0051822
	ENSMUSG00000032458	coatomer protein complex, subunit beta 2 (beta prime) [Source:MGI Symbol;Acc:MGI:1354962]	Copb2	148	154.4	152.7	144.7	155	149.6		151.7	149.767		0.0128673	0.499936	0.117279		O55029	Coatomer subunit beta'	COPB2_MOUSE	Copb2	138979	139232	147712	109122	124633	119439		141974	117731		-0.271748	0.0279451	0.0185764
	ENSMUSG00000055681	coatomer protein complex, subunit epsilon [Source:MGI Symbol;Acc:MGI:1891702]	Cope	110.2	118.6	117.4	115.2	110.4	111.2		115.4	112.267		-0.0445413	0.372389	0.38412		O89079	Coatomer subunit epsilon	COPE_MOUSE	Cope	102541	99585	106403	80138	96555	67676		102843	81456.3		-0.351014	0.0333057	0.0465023
	ENSMUSG00000030058	coatomer protein complex, subunit gamma 1 [Source:MGI Symbol;Acc:MGI:1858696]	Copg1	66.9	65.1	65.8	58.9	62.8	60.9		65.9333	60.8667		-0.0812474	0.115448	1.37396		Q9QZE5	Coatomer subunit gamma-1	COPG1_MOUSE	Copg1	119245	112547	114839	81204	93707	87570		115544	87493.7		-0.403236	0.0279451	0.00326338
	ENSMUSG00000025607	coatomer protein complex, subunit gamma 2 [Source:MGI Symbol;Acc:MGI:1858683]	Copg2	37.7	37.9	34.2	32	35.8	34.5		36.6	34.1		-0.0164009	0.505611	0.105419		Q9QXK3	Coatomer subunit gamma-2	COPG2_MOUSE	Copg2	46998	43240	41724	28000	34414	32464		43987.3	31626		-0.479527	0.0279451	0.00424298
	ENSMUSG00000027206	COP9 signalosome subunit 2 [Source:MGI Symbol;Acc:MGI:1330276]	Cops2	176.9	179.5	180.8	185.5	197.5	189.5		179.067	190.833		0.119437	0.0531108	2.01101		P61202	COP9 signalosome complex subunit 2	CSN2_MOUSE	Cops2	79714	76973	71374	54467	62536	62587		76020.3	59863.3		-0.346217	0.0279451	0.0106367
	ENSMUSG00000019373	COP9 signalosome subunit 3 [Source:MGI Symbol;Acc:MGI:1349409]	Cops3	103.9	113.3	109.2	121.7	114.4	117.3		108.8	117.8		0.111237	0.171203	1.04407		O88543	COP9 signalosome complex subunit 3	CSN3_MOUSE	Cops3	58827	59525	60178	43080	51691	48537		59510	47769.3		-0.321065	0.0279451	0.0132752
	ENSMUSG00000035297	COP9 signalosome subunit 4 [Source:MGI Symbol;Acc:MGI:1349414]	Cops4	80.8	86	85.6	81.5	88.5	81.8		84.1333	83.9333		0.0221732	0.466903	0.180418		O88544	COP9 signalosome complex subunit 4	CSN4_MOUSE	Cops4	88319	92016	90992	69324	79516	75213		90442.3	74684.3		-0.278255	0.0279451	0.0155582
	ENSMUSG00000025917	COP9 signalosome subunit 5 [Source:MGI Symbol;Acc:MGI:1349415]	Cops5	116.1	121	118.7	116.6	115.9	118.2		118.6	116.9		-0.00411325	0.543845	0.0310871		O35864	COP9 signalosome complex subunit 5	CSN5_MOUSE	Cops5	92466	86634	77063	59359	70867	64948		85387.7	65058		-0.39201	0.0279451	0.0119342
	ENSMUSG00000019494	COP9 signalosome subunit 6 [Source:MGI Symbol;Acc:MGI:1349439]	Cops6	122.9	127.1	134.9	128.1	132.4	134.6		128.3	131.7		0.0452857	0.376842	0.375484		O88545	COP9 signalosome complex subunit 6	CSN6_MOUSE	Cops6	62921	60320	58673	44290	51817	48734		60638	48280.3		-0.33118	0.0279451	0.0100458
	ENSMUSG00000030127	COP9 signalosome subunit 7A [Source:MGI Symbol;Acc:MGI:1349400]	Cops7a	66.8	62.4	67.4	78.6	64.5	67.9		65.5333	70.3333		0.0414898	0.379557	0.36845		Q9CZ04-2	Isoform 2 of COP9 signalosome complex subunit 7a	CSN7A_MOUSE	Cops7a	27766	30249	28581	23372	26892	27772		28865.3	26012		-0.153225	0.0686733	0.162967
	ENSMUSG00000026240	COP9 signalosome subunit 7B [Source:MGI Symbol;Acc:MGI:1349388]	Cops7b	19.1	19.1	19.4	20.9	18.2	19.3		19.2	19.4667		-0.00916057	0.528399	0.0621098		Q8BV13	COP9 signalosome complex subunit 7b	CSN7B_MOUSE	Cops7b	13886	14125	13571	11035	11814	12221		13860.7	11690		-0.246821	0.0279451	0.018604
	ENSMUSG00000034432	COP9 signalosome subunit 8 [Source:MGI Symbol;Acc:MGI:1915363]	Cops8	67.9	69.8	69	66.3	70.6	65.9		68.9	67.6		-0.00075843	0.557694	0.00563189		Q8VBV7	COP9 signalosome complex subunit 8	CSN8_MOUSE	Cops8	81888	99571	123329	77934	100146	88286		101596	88788.7		-0.181782	0.116688	0.343693
	ENSMUSG00000060992	coatomer protein complex, subunit zeta 1 [Source:MGI Symbol;Acc:MGI:1929063]	Copz1	127.4	130	127	130.9	126.2	124.9		128.133	127.333		-0.00220005	0.550668	0.0188821		P61924	Coatomer subunit zeta-1	COPZ1_MOUSE	Copz1	90400	176458	155268	125518	113528	83188		140709	107411		-0.354363	0.0970085	0.268355
	ENSMUSG00000028247	coenzyme Q3 methyltransferase [Source:MGI Symbol;Acc:MGI:101813]	Coq3	14.4	15.8	14.6	11.6	14	12.6		14.9333	12.7333		-0.149141	0.186011	0.970911		Q8BMS4	Ubiquinone biosynthesis O-methyltransferase, mitochondrial	COQ3_MOUSE	Coq3	2284	1968	2290	2077	2277	2116		2180.67	2156.67		-0.0135551	0.242033	0.891568
	ENSMUSG00000041733	coenzyme Q5 methyltransferase [Source:MGI Symbol;Acc:MGI:1098643]	Coq5	34.5	37.4	38.6	35.5	34.8	35.3		36.8333	35.2		-0.0759805	0.271992	0.651655		Q9CXI0	2-methoxy-6-polyprenyl-1,4-benzoquinol methylase, mitochondrial	COQ5_MOUSE	Coq5	3383	4911	7560	4121	5805	3373		5284.67	4433		-0.212794	0.167822	0.552941
	ENSMUSG00000021235	coenzyme Q6 monooxygenase [Source:MGI Symbol;Acc:MGI:1924408]	Coq6	19.5	20.5	19.7	19.8	18.1	17		19.9	18.3		-0.141055	0.13149	1.26586		Q8R1S0	Ubiquinone biosynthesis monooxygenase COQ6, mitochondrial	COQ6_MOUSE	Coq6	14398	24657	18379	51606	42390	20819		19144.7	38271.7		0.934413	0.0339162	0.0491221
	ENSMUSG00000030652	demethyl-Q 7 [Source:MGI Symbol;Acc:MGI:107207]	Coq7	12.4	13.2	13.4	14.3	12.8	12.9		13	13.3333		0.00120783	0.557177	0.00686136		P97478	5-demethoxyubiquinone hydroxylase, mitochondrial	COQ7_MOUSE	Coq7	3523	3190	2899	2828	2867	2471		3204	2722		-0.233832	0.0426374	0.0772314
	ENSMUSG00000031782	coenzyme Q9 [Source:MGI Symbol;Acc:MGI:1915164]	Coq9	23	23.7	23.2	24.6	21.7	22.5		23.3	22.9333		-0.0415021	0.400869	0.321789		Q8K1Z0	Ubiquinone biosynthesis protein COQ9, mitochondrial	COQ9_MOUSE	Coq9	2290	3161	2492	2142	2753	2150		2647.67	2348.33		-0.169578	0.116396	0.342494
	ENSMUSG00000030707	coronin, actin binding protein 1A [Source:MGI Symbol;Acc:MGI:1345961]	Coro1a	1614.6	1782.4	1776.7	2153.2	1893.8	1874.4		1724.57	1973.8		0.150358	0.0520951	2.02817		O89053	Coronin-1A	COR1A_MOUSE	Coro1a	2741572	2767095	2761620	2503150	2623594	2529563		2.75676e+06	2.5521e+06		-0.111571	0.0672725	0.158132
	ENSMUSG00000024835	coronin, actin binding protein 1B [Source:MGI Symbol;Acc:MGI:1345963]	Coro1b	95.5	98.9	99.3	106.3	109.1	99.9		97.9	105.1		0.108102	0.104746	1.45323		Q9WUM3	Coronin-1B	COR1B_MOUSE	Coro1b	64520	68085	65723	52085	59346	60620		66109.3	57350.3		-0.20789	0.0371149	0.0589479
	ENSMUSG00000004530	coronin, actin binding protein 1C [Source:MGI Symbol;Acc:MGI:1345964]	Coro1c	102.3	107.6	110.4	107.6	106.7	102.7		106.767	105.667		-0.0214066	0.460869	0.192467		Q9WUM4	Coronin-1C	COR1C_MOUSE	Coro1c	134151	137938	133497	103376	119465	119688		135195	114176		-0.246972	0.0292569	0.0323061
	ENSMUSG00000028337	coronin, actin binding protein 2A [Source:MGI Symbol;Acc:MGI:1345966]	Coro2a	206.2	197.9	201.9	244.6	208.9	200		202	217.833		0.0611972	0.265658	0.671321		Q8C0P5	Coronin-2A	COR2A_MOUSE	Coro2a	39721	42745	36798	41695	41355	34686		39754.7	39245.3		-0.0209984	0.234342	0.855021
	ENSMUSG00000039637	coronin 7 [Source:MGI Symbol;Acc:MGI:1926135]	Coro7	32	28.4	33.1	46.3	36.5	32.8		31.1667	38.5333		0.187841	0.0567496	1.96459		Q9D2V7	Coronin-7	CORO7_MOUSE	Coro7	44385	39478	43646	48128	46985	40851		42503	45321.3		0.0908259	0.130891	0.398743
	ENSMUSG00000031827	coactosin-like 1 (Dictyostelium) [Source:MGI Symbol;Acc:MGI:1919292]	Cotl1	913.5	925.7	953.7	966.1	857.8	896.4		930.967	906.767		-0.0677668	0.281672	0.623938		Q9CQI6	Coactosin-like protein	COTL1_MOUSE	Cotl1	1264925	1155884	1053622	991159	869553	911873		1.15814e+06	924195		-0.323656	0.0279451	0.0193533
	ENSMUSG00000040018	cytochrome c oxidase assembly protein 15 [Source:MGI Symbol;Acc:MGI:1920112]	Cox15	37	38.5	39.6	35.9	37.3	35.8		38.3667	36.3333		-0.0705227	0.260779	0.685569		Q8BJ03;Q8BJ03-2	Cytochrome c oxidase assembly protein COX15 homolog;Isoform 2 of Cytochrome c oxidase assembly protein COX15 homolog	COX15_MOUSE	Cox15	5956	5768	5410	4475	4793	5381		5711.33	4883		-0.229118	0.0369529	0.0584681
	ENSMUSG00000091803	cytochrome c oxidase assembly protein 16 [Source:MGI Symbol;Acc:MGI:1913522]	Cox16	2.6	3.3	3.2	2.6	2.7	3.3		3.03333	2.86667		-0.0708688	0.473869	0.16674		Q9CR63	Cytochrome c oxidase assembly protein COX16 homolog, mitochondrial	COX16_MOUSE	Cox16	8171	7888	9385	7714	7932	7807		8481.33	7817.67		-0.113532	0.0959427	0.264408
	ENSMUSG00000046516	cytochrome c oxidase assembly protein 17, copper chaperone [Source:MGI Symbol;Acc:MGI:1333806]	Cox17	6	4.9	4.9	5.8	4.8	3.7		5.26667	4.76667		-0.196777	0.222327	0.814175		P56394	Cytochrome c oxidase copper chaperone	COX17_MOUSE	Cox17	20370	21296	21409	15755	16115	8231		21025	13367		-0.717297	0.0306085	0.0373714
	ENSMUSG00000026500	cytochrome c oxidase assembly protein 20 [Source:MGI Symbol;Acc:MGI:1913609]	Cox20	70.2	63.7	67.8	66.9	63.9	74		67.2333	68.2667		0.0414688	0.443987	0.227043		Q9D7J4	Cytochrome c oxidase assembly protein COX20, mitochondrial	COX20_MOUSE	Cox20	20156	19735	25086	20663	22236	18649		21659	20516		-0.0732677	0.17593	0.587076
	ENSMUSG00000031818	cytochrome c oxidase subunit 4I1 [Source:MGI Symbol;Acc:MGI:88473]	Cox4i1	586.7	646.4	630.1	678.3	650.1	644.6		621.067	657.667		0.0766815	0.233911	0.774005		P19783	Cytochrome c oxidase subunit 4 isoform 1, mitochondrial	COX41_MOUSE	Cox4i1	546470	608285	594858	539367	577253	535460		583204	550693		-0.0820617	0.120465	0.35739
	ENSMUSG00000000088	cytochrome c oxidase subunit 5A [Source:MGI Symbol;Acc:MGI:88474]	Cox5a	279.8	283.2	286.6	284.7	302.7	290.5		283.2	292.633		0.0735354	0.23969	0.754835		P12787	Cytochrome c oxidase subunit 5A, mitochondrial	COX5A_MOUSE	Cox5a	91016	96339	89367	80583	93712	55932		92240.7	76742.3		-0.2972	0.0727708	0.177832
	ENSMUSG00000061518	cytochrome c oxidase subunit 5B [Source:MGI Symbol;Acc:MGI:88475]	Cox5b	232.1	230.5	236.9	236.7	245.3	242.7		233.167	241.567		0.071719	0.279489	0.630455		P19536	Cytochrome c oxidase subunit 5B, mitochondrial	COX5B_MOUSE	Cox5b	208238	220831	157126	179172	193192	102637		195398	158334		-0.341389	0.0948754	0.259908
	ENSMUSG00000041697	cytochrome c oxidase subunit 6A1 [Source:MGI Symbol;Acc:MGI:103099]	Cox6a1	691.9	753.6	722.9	751.2	776.9	724.9		722.8	751		0.0727166	0.285248	0.613073		P43024	Cytochrome c oxidase subunit 6A1, mitochondrial	CX6A1_MOUSE	Cox6a1	24963	27113	12989	15151	13577	16714		21688.3	15147.3		-0.451477	0.0712938	0.17254
	ENSMUSG00000036751	cytochrome c oxidase, subunit 6B1 [Source:MGI Symbol;Acc:MGI:107460]	Cox6b1	734.2	788.1	727.4	749.2	789.5	768.9		749.9	769.2		0.0807123	0.223464	0.809541		P56391	Cytochrome c oxidase subunit 6B1	CX6B1_MOUSE	Cox6b1	591925	624523	650151	630490	619007	583521		622200	611006		-0.02591	0.213681	0.754868
	ENSMUSG00000014313	cytochrome c oxidase subunit 6C [Source:MGI Symbol;Acc:MGI:104614]	Cox6c	103.6	108.6	105.6	112.4	113.5	110.3		105.933	112.067		0.0984216	0.147828	1.16837		Q9CPQ1	Cytochrome c oxidase subunit 6C	COX6C_MOUSE	Cox6c	651918	737295	726754	691688	729290	731694		705322	717557		0.026485	0.215468	0.763265
	ENSMUSG00000032330	cytochrome c oxidase subunit 7A2 [Source:MGI Symbol;Acc:MGI:1316715]	Cox7a2	376.6	415.5	400.4	407.7	427.5	401.9		397.5	412.367		0.0731858	0.277422	0.637026		P48771	Cytochrome c oxidase subunit 7A2, mitochondrial	CX7A2_MOUSE	Cox7a2	13107	11928	11579	9412	9601	8375		12204.7	9129.33		-0.419403	0.0279451	0.004465
	ENSMUSG00000024248	cytochrome c oxidase subunit 7A2 like [Source:MGI Symbol;Acc:MGI:106015]	Cox7a2l	203.4	207.8	207.8	264	220.1	216.7		206.333	233.6		0.12235	0.116369	1.36631		Q61387	Cytochrome c oxidase subunit 7A-related protein, mitochondrial	COX7R_MOUSE	Cox7a2l	6962	7920	7472	5941	6629	6660		7451.33	6410		-0.217159	0.0359579	0.0553774
	ENSMUSG00000017778	cytochrome c oxidase subunit 7C [Source:MGI Symbol;Acc:MGI:103226]	Cox7c	136.3	134.8	143	147	148.7	143.3		138.033	146.333		0.0828619	0.197896	0.918122		P17665	Cytochrome c oxidase subunit 7C, mitochondrial	COX7C_MOUSE	Cox7c	54426	46187	52069	48144	48142	39107		50894	45131		-0.17671	0.0768829	0.193144
	ENSMUSG00000020300	cytoplasmic polyadenylation element binding protein 4 [Source:MGI Symbol;Acc:MGI:1914829]	Cpeb4	67.8	58.5	59.2	36.5	48.3	50.8		61.8333	45.2		-0.322123	0.0112664	3.26465		Q7TN98;Q7TN98-2;Q7TN98-3;Q7TN98-4;Q7TN98-5	Cytoplasmic polyadenylation element-binding protein 4;Isoform 2 of Cytoplasmic polyadenylation element-binding protein 4;Isoform 3 of Cytoplasmic polyadenylation element-binding protein 4;Isoform 4 of Cytoplasmic polyadenylation element-binding protein 4;Isoform 5 of Cytoplasmic polyadenylation element-binding protein 4	CPEB4_MOUSE	Cpeb4	1019	1063	937	340	622	614		1006.33	525.333		-0.988838	0.0279451	0.00732043
	ENSMUSG00000034361	copine II [Source:MGI Symbol;Acc:MGI:2387578]	Cpne2	15.7	12.2	14.3	12.5	12.6	13.8		14.0667	12.9667		-0.0856981	0.345109	0.452359		P59108	Copine-2	CPNE2_MOUSE	Cpne2	275	947	1197	816	187	1073		806.333	692		-0.309654	0.207219	0.724852
	ENSMUSG00000028228	copine III [Source:MGI Symbol;Acc:MGI:1917818]	Cpne3	27.4	25.5	26.5	35	30	28.2		26.4667	31.0667		0.180895	0.032627	2.41517		Q8BT60	Copine-3	CPNE3_MOUSE	Cpne3	50399	45303	44869	41329	46178	42272		46857	43259.7		-0.114886	0.0916203	0.247035
	ENSMUSG00000022742	coproporphyrinogen oxidase [Source:MGI Symbol;Acc:MGI:104841]	Cpox	25.3	23	24.5	28.4	25.7	26.5		24.2667	26.8667		0.128131	0.107887	1.42671		P36552	Oxygen-dependent coproporphyrinogen-III oxidase, mitochondrial	HEM6_MOUSE	Cpox	49836	46083	42731	39309	42062	42265		46216.7	41212		-0.163288	0.0552047	0.117913
	ENSMUSG00000065979	calcineurin-like phosphoesterase domain containing 1 [Source:MGI Symbol;Acc:MGI:2443300]	Cpped1	14.4	14.6	16.1	14.7	14.1	13.6		15.0333	14.1333		-0.128281	0.15391	1.133		Q8BFS6;Q8BFS6-3;Q8BFS6-4	Serine/threonine-protein phosphatase CPPED1;Isoform 3 of Serine/threonine-protein phosphatase CPPED1;Isoform 4 of Serine/threonine-protein phosphatase CPPED1	CPPED_MOUSE	Cpped1	4328	5022	4841	4478	2564	3065		4730.33	3369		-0.52671	0.0334171	0.0476117
	ENSMUSG00000034022	cleavage and polyadenylation specific factor 1 [Source:MGI Symbol;Acc:MGI:2679722]	Cpsf1	90.4	86.8	89.3	99.6	83	82.6		88.8333	88.4		-0.0608907	0.218647	0.828294		Q9EPU4	Cleavage and polyadenylation specificity factor subunit 1	CPSF1_MOUSE	Cpsf1	33443	30884	22163	24272	25489	26900		28830	25553.7		-0.153314	0.129842	0.393599
	ENSMUSG00000041781	cleavage and polyadenylation specific factor 2 [Source:MGI Symbol;Acc:MGI:1861601]	Cpsf2	89.6	89.5	93.4	87.5	89.3	90		90.8333	88.9333		-0.0175871	0.484105	0.149351		O35218	Cleavage and polyadenylation specificity factor subunit 2	CPSF2_MOUSE	Cpsf2	43560	42391	43192	36025	38813	36340		43047.7	37059.3		-0.21681	0.0283715	0.0252929
	ENSMUSG00000054309	cleavage and polyadenylation specificity factor 3 [Source:MGI Symbol;Acc:MGI:1859328]	Cpsf3	80.7	79.5	87.5	87.3	79.4	83.5		82.5667	83.4		-0.0191586	0.481242	0.15552		Q9QXK7	Cleavage and polyadenylation specificity factor subunit 3	CPSF3_MOUSE	Cpsf3	47084	45409	46631	40618	43536	40769		46374.7	41641		-0.155901	0.0427174	0.0775084
	ENSMUSG00000055531	cleavage and polyadenylation specific factor 6 [Source:MGI Symbol;Acc:MGI:1913948]	Cpsf6	62.8	56.6	62.5	68.3	62.9	59.4		60.6333	63.5333		0.03374	0.384834	0.356561		Q6NVF9	Cleavage and polyadenylation specificity factor subunit 6	CPSF6_MOUSE	Cpsf6	140856	140156	155929	128513	144473	131718		145647	134901		-0.110659	0.0951637	0.260854
	ENSMUSG00000034820	cleavage and polyadenylation specific factor 7 [Source:MGI Symbol;Acc:MGI:1917826]	Cpsf7	76.4	74.2	72.1	76.9	73.2	68.1		74.2333	72.7333		-0.0278407	0.417921	0.285278		Q8BTV2;Q8BTV2-2	Cleavage and polyadenylation specificity factor subunit 7;Isoform 2 of Cleavage and polyadenylation specificity factor subunit 7	CPSF7_MOUSE	Cpsf7	21431	20252	20558	18921	19621	18236		20747	18926		-0.132762	0.0570637	0.124192
	ENSMUSG00000024900	carnitine palmitoyltransferase 1a, liver [Source:MGI Symbol;Acc:MGI:1098296]	Cpt1a	19.7	18	18.7	24.3	20.5	19.2		18.8	21.3333		0.128182	0.125326	1.30287		P97742	Carnitine O-palmitoyltransferase 1, liver isoform	CPT1A_MOUSE	Cpt1a	3758	3997	4047	4360	4263	3696		3934	4106.33		0.0588088	0.168959	0.557149
	ENSMUSG00000028607	carnitine palmitoyltransferase 2 [Source:MGI Symbol;Acc:MGI:109176]	Cpt2	17.6	16.3	19	16.1	16.3	15.6		17.6333	16		-0.161303	0.178214	1.00883		P52825	Carnitine O-palmitoyltransferase 2, mitochondrial	CPT2_MOUSE	Cpt2	9376	10481	8819	8143	11020	8675		9558.67	9279.33		-0.0516052	0.207513	0.726902
	ENSMUSG00000016481	complement component (3b/4b) receptor 1-like [Source:MGI Symbol;Acc:MGI:88513]	Cr1l	26.6	28.4	27	26.9	26.9	28.3		27.3333	27.3667		0.0311365	0.438257	0.238708		Q64735;Q64735-2	Complement component receptor 1-like protein;Isoform 2 of Complement component receptor 1-like protein	CR1L_MOUSE	Cr1l	28785	28637	26596	20515	22531	20841		28006	21295.7		-0.395464	0.0279451	0.00279843
	ENSMUSG00000045867	CASP2 and RIPK1 domain containing adaptor with death domain [Source:MGI Symbol;Acc:MGI:1336168]	Cradd	3.3	3.7	3.7	6.7	4.9	3.7		3.56667	5.1		0.321445	0.11141	1.40361		O88843	Death domain-containing protein CRADD	CRADD_MOUSE	Cradd	8123	6046	4782	6631	6320	4724		6317	5891.67		-0.0821493	0.208987	0.733094
	ENSMUSG00000005362	cereblon [Source:MGI Symbol;Acc:MGI:1913277]	Crbn	21.4	20.7	23.2	26.2	21.6	22.8		21.7667	23.5333		0.0356522	0.448147	0.216649		Q8C7D2;Q8C7D2-2;Q8C7D2-3	Protein cereblon;Isoform 2 of Protein cereblon;Isoform 3 of Protein cereblon	CRBN_MOUSE	Crbn	3815	3011	4615	3979	4442	3646		3813.67	4022.33		0.0938911	0.180724	0.609008
	ENSMUSG00000025532	calcitonin gene-related peptide-receptor component protein [Source:MGI Symbol;Acc:MGI:1100818]	Crcp	114	114.6	114.2	104	111.2	115.8		114.267	110.333		-0.00514193	0.543613	0.0317816		O35427	DNA-directed RNA polymerase III subunit RPC9	RPC9_MOUSE	Crcp	7060	4868	1418	1767	1993	1632		4448.67	1797.33		-1.02799	0.0578592	0.127121
	ENSMUSG00000025958	cAMP responsive element binding protein 1 [Source:MGI Symbol;Acc:MGI:88494]	Creb1	13.8	11.1	12.6	18.1	14.5	14.2		12.5	15.6		0.252036	0.016533	2.93239		Q01147	Cyclic AMP-responsive element-binding protein 1	CREB1_MOUSE	Creb1	28893	33498	36682	34984	34934	36672		33024.3	35530		0.112046	0.115142	0.33813
	ENSMUSG00000022521	CREB binding protein [Source:MGI Symbol;Acc:MGI:1098280]	Crebbp	19.7	18.8	19	20.3	19	18.2		19.1667	19.1667		-0.00869968	0.521725	0.0741143		P45481	Histone lysine acetyltransferase CREBBP	CBP_MOUSE	Crebbp	3495	3054	3593	2857	3144	2870		3380.67	2957		-0.191009	0.0486857	0.0959101
	ENSMUSG00000040713	cellular repressor of E1A-stimulated genes 1 [Source:MGI Symbol;Acc:MGI:1344382]	Creg1	15.4	17.7	17.6	16.9	14.8	16.5		16.9	16.0667		-0.108238	0.290831	0.597102		O88668	Protein CREG1	CREG1_MOUSE	Creg1	8165	8373	5842	4357	4537	4827		7460	4573.67		-0.688486	0.0279451	0.00460183
	ENSMUSG00000023272	cysteine-rich with EGF-like domains 2 [Source:MGI Symbol;Acc:MGI:1923987]	Creld2	183.4	201.9	195.5	149.2	177.4	172.3		193.6	166.3		-0.155976	0.100814	1.48833		Q9CYA0	Protein disulfide isomerase Creld2	CREL2_MOUSE	Creld2	55512	56926	60997	37885	49784	50143		57811.7	45937.3		-0.342423	0.0317322	0.0412383
	ENSMUSG00000006360	cysteine-rich protein 1 (intestinal) [Source:MGI Symbol;Acc:MGI:88501]	Crip1	161.2	158.2	164.7	321.9	201.3	212.2		161.367	245.133		0.424985	0.00257262	4.46793		P63254	Cysteine-rich protein 1	CRIP1_MOUSE	Crip1	745923	703396	892203	1038382	854301	708326		780507	867003		0.141563	0.139769	0.434698
	ENSMUSG00000006356	cysteine rich protein 2 [Source:MGI Symbol;Acc:MGI:1915587]	Crip2	3.2	3.8	3.1	4.7	4.2	3.7		3.36667	4.2		0.334397	0.15259	1.14206		Q9DCT8	Cysteine-rich protein 2	CRIP2_MOUSE	Crip2	1447	1466	1664	1489	1590	1502		1525.67	1527		0.00354996	0.258006	0.969341
	ENSMUSG00000024146	cysteine-rich PDZ-binding protein [Source:MGI Symbol;Acc:MGI:1929655]	Cript	74.5	74.3	67.3	77.3	69.1	76.2		72.0333	74.2		0.0715939	0.331174	0.487291		O70333	Cysteine-rich PDZ-binding protein	CRIPT_MOUSE	Cript	14815	12175	13363	12540	12930	11407		13451	12292.3		-0.127348	0.0973166	0.26942
	ENSMUSG00000017776	v-crk avian sarcoma virus CT10 oncogene homolog [Source:MGI Symbol;Acc:MGI:88508]	Crk	42.4	37.7	40.6	45.8	41.7	40.4		40.2333	42.6333		0.0599986	0.256704	0.699472		Q64010;Q64010-2	Adapter molecule crk;Isoform Crk-I of Adapter molecule crk	CRK_MOUSE	Crk	7577	7965	7848	6044	6905	6525		7796.67	6491.33		-0.266168	0.0279451	0.018442
	ENSMUSG00000006134	v-crk avian sarcoma virus CT10 oncogene homolog-like [Source:MGI Symbol;Acc:MGI:104686]	Crkl	82.1	76	79.3	82.7	81.2	77.1		79.1333	80.3333		0.0243936	0.425899	0.266218		P47941	Crk-like protein	CRKL_MOUSE	Crkl	94811	87798	96633	73166	85275	86367		93080.7	81602.7		-0.192661	0.049166	0.0976326
	ENSMUSG00000033467	cytokine receptor-like factor 2 [Source:MGI Symbol;Acc:MGI:1889506]	Crlf2	44.4	55.5	61.3	57.7	56.8	50		53.7333	54.8333		-0.0455374	0.484769	0.147819		Q8CII9;Q8CII9-3	Cytokine receptor-like factor 2;Isoform 3 of Cytokine receptor-like factor 2	CRLF2_MOUSE	Crlf2	8749	8872	8529	6145	6565	6596		8716.67	6435.33		-0.438318	0.0279451	0.00101106
	ENSMUSG00000017561	cytokine receptor-like factor 3 [Source:MGI Symbol;Acc:MGI:1860086]	Crlf3	64.2	59.4	64.5	75.8	65.7	63.2		62.7	68.2333		0.0684415	0.254604	0.706401		Q9Z2L7	Cytokine receptor-like factor 3	CRLF3_MOUSE	Crlf3	41481	36461	35173	29474	31811	32628		37705	31304.3		-0.266065	0.0294136	0.0329269
	ENSMUSG00000029121	collapsin response mediator protein 1 [Source:MGI Symbol;Acc:MGI:107793]	Crmp1	21.4	20.3	21.6	31.2	24.3	22.7		21.1	26.0667		0.202711	0.0352042	2.35304		P97427	Dihydropyrimidinase-related protein 1	DPYL1_MOUSE	Crmp1	62907	63389	70249	63205	68225	63268		65515	64899.3		-0.0127052	0.240744	0.885501
	ENSMUSG00000001767	crooked neck pre-mRNA splicing factor 1 [Source:MGI Symbol;Acc:MGI:1914127]	Crnkl1	58.8	57.9	59.4	69.1	64	63.4		58.7	65.5		0.140996	0.0266494	2.57174		P63154	Crooked neck-like protein 1	CRNL1_MOUSE	Crnkl1	32455	30586	30909	28640	27832	27930		31316.7	28134		-0.154249	0.0417527	0.0736265
	ENSMUSG00000040860	ciliary rootlet coiled-coil, rootletin [Source:MGI Symbol;Acc:MGI:3529431]	Crocc	3	2.7	3	4.8	3.6	3.1		2.9	3.83333		0.258006	0.0900965	1.58706		Q8CJ40-2	Isoform 2 of Rootletin	CROCC_MOUSE	Crocc	456	148	124	117	127	113		242.667	119		-0.772437	0.0690586	0.164411
	ENSMUSG00000003623	carnitine O-octanoyltransferase [Source:MGI Symbol;Acc:MGI:1921364]	Crot	46.4	47	45.7	47	46.5	45.3		46.3667	46.2667		0.0122537	0.512551	0.091421		Q9DC50	Peroxisomal carnitine O-octanoyltransferase	OCTC_MOUSE	Crot	42278	41644	39469	27217	32472	33583		41130.3	31090.7		-0.4091	0.0279451	0.00805962
	ENSMUSG00000032021	cytotoxic and regulatory T cell molecule [Source:MGI Symbol;Acc:MGI:1859822]	Crtam	6	4.4	5.1	5.2	4.9	5.5		5.16667	5.2		0.0352952	0.496414	0.126112		Q149L7;Q149L7-3	Cytotoxic and regulatory T-cell molecule;Isoform 3 of Cytotoxic and regulatory T-cell molecule	CRTAM_MOUSE	Crtam	2159	5096	250	605	550	699		2501.67	618		-1.18795	0.10715	0.306856
	ENSMUSG00000027936	CREB regulated transcription coactivator 2 [Source:MGI Symbol;Acc:MGI:1921593]	Crtc2	46.5	42.8	42.2	44.9	38.7	36.9		43.8333	40.1667		-0.14953	0.10998	1.41288		Q3U182	CREB-regulated transcription coactivator 2	CRTC2_MOUSE	Crtc2	743	645	818	856	892	753		735.333	833.667		0.184181	0.0735899	0.180317
	ENSMUSG00000030527	CREB regulated transcription coactivator 3 [Source:MGI Symbol;Acc:MGI:1917711]	Crtc3	14.7	13.3	14.5	14.3	13.7	13.7		14.1667	13.9		-0.0357707	0.403308	0.316324		Q91X84	CREB-regulated transcription coactivator 3	CRTC3_MOUSE	Crtc3	1185	1436	971	845	989	1372		1197.33	1068.67		-0.175713	0.147179	0.464694
	ENSMUSG00000020038	cryptochrome 1 (photolyase-like) [Source:MGI Symbol;Acc:MGI:1270841]	Cry1	26	27.2	26.7	27.9	27	23.9		26.6333	26.2667		-0.0350284	0.428358	0.261362		P97784	Cryptochrome-1	CRY1_MOUSE	Cry1	747	605	540	395	468	322		630.667	395		-0.678527	0.0279451	0.00996846
	ENSMUSG00000019866	crystallin beta-gamma domain containing 1 [Source:MGI Symbol;Acc:MGI:109544]	Crybg1	130.8	126	133.2	139.2	136.3	134.5		130	136.667		0.0699851	0.206906	0.874197		A0A0G2JG52;E9PVP1	Crystallin beta-gamma domain-containing 1	A0A0G2JG52_MOUSE;E9PVP1_MOUSE	Crybg1	12473	11146	10435	7865	9384	9116		11351.3	8788.33		-0.3695	0.0279451	0.0162147
	ENSMUSG00000021947	crystallin, lambda 1 [Source:MGI Symbol;Acc:MGI:1915881]	Cryl1	7	5.5	6.6	12.8	9	9.3		6.36667	10.3667		0.574998	0.00549337	3.8		Q99KP3	Lambda-crystallin homolog	CRYL1_MOUSE	Cryl1	1817	1976	1401	2125	1487	1456		1731.33	1689.33		-0.0429068	0.230749	0.837995
	ENSMUSG00000028199	crystallin, zeta [Source:MGI Symbol;Acc:MGI:88527]	Cryz	3.5	2.9	3.3	3	2.8	3.3		3.23333	3.03333		-0.0930454	0.366231	0.399755		P47199	Quinone oxidoreductase	QOR_MOUSE	Cryz	3350	3285	2090	1944	3122	3219		2908.33	2761.67		-0.078482	0.219729	0.783653
	ENSMUSG00000058240	crystallin, zeta (quinone reductase)-like 1 [Source:MGI Symbol;Acc:MGI:1913859]	Cryzl1	16.3	16.4	15.7	14	15.3	14.2		16.1333	14.5		-0.100643	0.197002	0.921905		Q921W4	Quinone oxidoreductase-like protein 1	QORL1_MOUSE	Cryzl1	8630	8636	8810	5740	7510	7386		8692	6878.67		-0.34807	0.0288563	0.0299194
	ENSMUSG00000005683	citrate synthase [Source:MGI Symbol;Acc:MGI:88529]	Cs	251.4	250.7	260.5	245.5	254.7	245.5		254.2	248.567		-0.0184099	0.467106	0.179843		Q9CZU6	Citrate synthase, mitochondrial	CISY_MOUSE	Cs	460466	504302	478648	356625	432675	447396		481139	412232		-0.229035	0.0453319	0.0857528
	ENSMUSG00000068823	cold shock domain containing E1, RNA binding [Source:MGI Symbol;Acc:MGI:92356]	Csde1	132.9	137.6	138.1	134.3	139.5	135.3		136.2	136.367		0.0207758	0.445381	0.223742		Q91W50	Cold shock domain-containing protein E1	CSDE1_MOUSE	Csde1	110523	114702	124283	88749	105741	101925		116503	98805		-0.240007	0.0356674	0.0545196
	ENSMUSG00000002718	chromosome segregation 1-like (S. cerevisiae) [Source:MGI Symbol;Acc:MGI:1339951]	Cse1l	140.3	135.4	147.1	158.8	138.8	145.1		140.933	147.567		0.0238602	0.462542	0.18942		Q9ERK4	Exportin-2	XPO2_MOUSE	Cse1l	160177	145894	160511	134122	147681	133864		155527	138556		-0.166821	0.049914	0.0995873
	ENSMUSG00000032312	c-src tyrosine kinase [Source:MGI Symbol;Acc:MGI:88537]	Csk	264.2	269.2	282.9	356.6	294.3	286.5		272.1	312.467		0.123319	0.0786127	1.69982		P41241	Tyrosine-protein kinase CSK	CSK_MOUSE	Csk	184946	169044	181322	176554	178413	163406		178437	172791		-0.0464219	0.176268	0.588492
	ENSMUSG00000024576	casein kinase 1, alpha 1 [Source:MGI Symbol;Acc:MGI:1934950]	Csnk1a1	143.2	143.6	149.1	141	144.3	141.9		145.3	142.4		-0.0182616	0.45638	0.20132		Q8BK63-2	Isoform 2 of Casein kinase I isoform alpha	KC1A_MOUSE	Csnk1a1	64694	62436	59455	45854	51732	54102		62195	50562.7		-0.301341	0.0279451	0.0180902
	ENSMUSG00000025162	casein kinase 1, delta [Source:MGI Symbol;Acc:MGI:1355272]	Csnk1d	105.7	109.1	109.1	115.2	108.6	106		107.967	109.933		0.0131561	0.496617	0.125671		Q9DC28;Q9DC28-2	Casein kinase I isoform delta;Isoform 2 of Casein kinase I isoform delta	KC1D_MOUSE	Csnk1d	14348	13130	13767	11463	13401	12010		13748.3	12291.3		-0.16379	0.0570637	0.124197
	ENSMUSG00000032384	casein kinase 1, gamma 1 [Source:MGI Symbol;Acc:MGI:2660884]	Csnk1g1	19.5	17.8	17.3	17.3	17.5	16.7		18.2	17.1667		-0.0442202	0.374427	0.379863		Q8BTH8	Casein kinase I isoform gamma-1	KC1G1_MOUSE	Csnk1g1	2463	1378	1467	1227	1293	1474		1769.33	1331.33		-0.363422	0.0719316	0.175032
	ENSMUSG00000003345	casein kinase 1, gamma 2 [Source:MGI Symbol;Acc:MGI:1920014]	Csnk1g2	111.9	120.4	121.6	138.1	118.1	112.8		117.967	123		-0.00183019	0.554616	0.0130375		Q8BVP5	Casein kinase I isoform gamma-2	KC1G2_MOUSE	Csnk1g2	231	260	242	204	210	280		244.333	231.333		-0.0923421	0.165232	0.541628
	ENSMUSG00000073563	casein kinase 1, gamma 3 [Source:MGI Symbol;Acc:MGI:1917675]	Csnk1g3	43.5	39.3	41.3	37.8	38.4	36.7		41.3667	37.6333		-0.117511	0.0816667	1.66572		Q8C4X2	Casein kinase I isoform gamma-3	KC1G3_MOUSE	Csnk1g3	4929	5197	5603	4482	4573	4751		5243	4602		-0.186553	0.0390447	0.0648784
	ENSMUSG00000074698	casein kinase 2, alpha 1 polypeptide [Source:MGI Symbol;Acc:MGI:88543]	Csnk2a1	54.2	50.2	53.4	52.3	50.5	49.9		52.6	50.9		-0.0498865	0.271852	0.652175		Q60737	Casein kinase II subunit alpha	CSK21_MOUSE	Csnk2a1	153822	148429	140535	108279	126153	126709		147595	120380		-0.296839	0.0279451	0.0212335
	ENSMUSG00000046707	casein kinase 2, alpha prime polypeptide [Source:MGI Symbol;Acc:MGI:88547]	Csnk2a2	43.8	42.6	42.8	39.7	42.2	42.4		43.0667	41.4333		-0.0155916	0.487896	0.141698		O54833	Casein kinase II subunit alpha'	CSK22_MOUSE	Csnk2a2	47057	43959	40744	33432	37798	38340		43920	36523.3		-0.266255	0.0297864	0.0344699
	ENSMUSG00000024387	casein kinase 2, beta polypeptide [Source:MGI Symbol;Acc:MGI:88548]	Csnk2b	372.1	377.9	379	350	372	368.1		376.333	363.367		-0.0182366	0.486567	0.144833		P67871	Casein kinase II subunit beta	CSK2B_MOUSE	Csnk2b	146834	156630	187607	149492	155071	142426		163690	148996		-0.128684	0.105207	0.299332
	ENSMUSG00000026421	cysteine and glycine-rich protein 1 [Source:MGI Symbol;Acc:MGI:88549]	Csrp1	186.2	198.2	197.1	263.4	225.4	220.5		193.833	236.433		0.234885	0.00737586	3.60453		P97315	Cysteine and glycine-rich protein 1	CSRP1_MOUSE	Csrp1	108647	88726	107116	87336	96725	85805		101496	89955.3		-0.170169	0.0725119	0.17704
	ENSMUSG00000027447	cystatin C [Source:MGI Symbol;Acc:MGI:102519]	Cst3	79.3	96.8	95.5	106.7	102.2	97		90.5333	101.967		0.139452	0.172838	1.03466		P21460	Cystatin-C	CYTC_MOUSE	Cst3	10181	13169	15703	9919	12590	11581		13017.7	11363.3		-0.180587	0.121394	0.360942
	ENSMUSG00000068129	cystatin F (leukocystatin) [Source:MGI Symbol;Acc:MGI:1298217]	Cst7	368.3	367	363.9	398	379.5	374.1		366.4	383.867		0.0687339	0.189011	0.957727		O89098	Cystatin-F	CYTF_MOUSE	Cst7	9492	10020	13897	10853	11813	11017		11136.3	11227.7		0.0319202	0.232813	0.847274
	ENSMUSG00000005054	cystatin B [Source:MGI Symbol;Acc:MGI:109514]	Cstb	203.3	233.2	204.9	153.6	209.4	192.5		213.8	185.167		-0.0853377	0.330458	0.490039		Q62426	Cystatin-B	CYTB_MOUSE	Cstb	190977	208411	792056	121873	172716	658663		397148	317751		-0.395037	0.18936	0.645995
	ENSMUSG00000027498	cleavage stimulation factor, 3' pre-RNA, subunit 1 [Source:MGI Symbol;Acc:MGI:1914587]	Cstf1	72	68.2	70.7	74.1	66.8	67.1		70.3	69.3333		-0.0415331	0.327598	0.497109		Q99LC2	Cleavage stimulation factor subunit 1	CSTF1_MOUSE	Cstf1	44450	44090	45339	35001	39847	42837		44626.3	39228.3		-0.190888	0.0491465	0.0974099
	ENSMUSG00000031256	cleavage stimulation factor, 3' pre-RNA subunit 2 [Source:MGI Symbol;Acc:MGI:1343054]	Cstf2	50.2	48.4	51.2	54.2	49.9	50.6		49.9333	51.5667		0.0266829	0.423943	0.271621		Q8BIQ5	Cleavage stimulation factor subunit 2	CSTF2_MOUSE	Cstf2	62914	66374	75375	65293	63180	50393		68221	59622		-0.199489	0.0749169	0.18484
	ENSMUSG00000053536	cleavage stimulation factor, 3' pre-RNA subunit 2, tau [Source:MGI Symbol;Acc:MGI:1932622]	Cstf2t	39.5	38.5	42.8	45	42.1	40.4		40.2667	42.5		0.0384872	0.397235	0.329558		Q8C7E9	Cleavage stimulation factor subunit 2 tau variant	CSTFT_MOUSE	Cstf2t	3274	3281	3788	2935	3359	3063		3447.67	3119		-0.14343	0.0791442	0.200558
	ENSMUSG00000027176	cleavage stimulation factor, 3' pre-RNA, subunit 3 [Source:MGI Symbol;Acc:MGI:1351825]	Cstf3	31.7	30.5	33.1	34.3	30.4	32.8		31.7667	32.5		-0.000100975	0.560937	0.000678767		Q99LI7	Cleavage stimulation factor subunit 3	CSTF3_MOUSE	Cstf3	50664	47599	48560	47595	57087	55434		48941	53372		0.121028	0.0944058	0.258311
	ENSMUSG00000037373	C-terminal binding protein 1 [Source:MGI Symbol;Acc:MGI:1201685]	Ctbp1	123.9	124.5	130.3	155.6	129.1	132.5		126.233	139.067		0.0779507	0.184728	0.976554		O88712;O88712-2	C-terminal-binding protein 1;Isoform 2 of C-terminal-binding protein 1	CTBP1_MOUSE	Ctbp1	38810	33318	31731	33677	33740	29972		34619.7	32463		-0.0895948	0.141083	0.440271
	ENSMUSG00000028189	chitobiase [Source:MGI Symbol;Acc:MGI:1921495]	Ctbs	4.9	5.1	4.7	3.6	5	3.9		4.9	4.16667		-0.117987	0.31663	0.526131		Q8R242	Di-N-acetylchitobiase	DIAC_MOUSE	Ctbs	1866	1756	1418	1039	1261	959		1680	1086.33		-0.628911	0.0279451	0.00628946
	ENSMUSG00000020898	CTS telomere maintenance complex component 1 [Source:MGI Symbol;Acc:MGI:1916214]	Ctc1	22.9	22.4	23	29	20.9	22		22.7667	23.9667		-0.0337608	0.44442	0.226001		Q5SUQ9	CST complex subunit CTC1	CTC1_MOUSE	Ctc1	6256	6200	5578	4811	5587	5500		6011.33	5299.33		-0.183138	0.0528849	0.109743
	ENSMUSG00000005698	CCCTC-binding factor [Source:MGI Symbol;Acc:MGI:109447]	Ctcf	149.3	139.3	155.1	181.3	154.3	153.6		147.9	163.067		0.0787589	0.178687	1.00665		Q61164	Transcriptional repressor CTCF	CTCF_MOUSE	Ctcf	11728	14273	17355	14926	13881	14040		14452	14282.3		0.000628352	0.263099	0.996831
	ENSMUSG00000033323	CTD (carboxy-terminal domain, RNA polymerase II, polypeptide A) phosphatase, subunit 1 [Source:MGI Symbol;Acc:MGI:1926953]	Ctdp1	46.3	48.7	49.6	58.1	54.2	51.3		48.2	54.5333		0.147236	0.0560984	1.97444		Q7TSG2	RNA polymerase II subunit A C-terminal domain phosphatase	CTDP1_MOUSE	Ctdp1	14182	14613	15520	13554	14747	13638		14771.7	13979.7		-0.0795566	0.121614	0.36193
	ENSMUSG00000026176	CTD (carboxy-terminal domain, RNA polymerase II, polypeptide A) small phosphatase 1 [Source:MGI Symbol;Acc:MGI:2654470]	Ctdsp1	46.5	44	45.1	73.2	48.9	45.7		45.2	55.9333		0.146611	0.129059	1.2817		P58466	Carboxy-terminal domain RNA polymerase II polypeptide A small phosphatase 1	CTDS1_MOUSE	Ctdsp1	1317	2750	3023	3404	2965	2514		2363.33	2961		0.404193	0.0977572	0.271229
	ENSMUSG00000033411	CTD (carboxy-terminal domain, RNA polymerase II, polypeptide A) small phosphatase like 2 [Source:MGI Symbol;Acc:MGI:1196405]	Ctdspl2	25.5	27.3	25.8	30.6	27.3	26.9		26.2	28.2667		0.0904555	0.137946	1.22337		Q8BG15	CTD small phosphatase-like protein 2	CTSL2_MOUSE	Ctdspl2	13857	13884	12030	11188	11675	12313		13257	11725.3		-0.175039	0.052912	0.109829
	ENSMUSG00000044258	cytotoxic T lymphocyte-associated protein 2 alpha [Source:MGI Symbol;Acc:MGI:88554]	Ctla2a	153.2	148.7	141.7	121.7	141.3	142.7		147.867	135.233		-0.0419939	0.44296	0.2298		P12399	Protein CTLA-2-alpha	CTL2A_MOUSE	Ctla2a	24166	27900	28582	22130	20698	13844		26882.7	18890.7		-0.534532	0.029706	0.0340839
	ENSMUSG00000026011	cytotoxic T-lymphocyte-associated protein 4 [Source:MGI Symbol;Acc:MGI:88556]	Ctla4	22.2	22.3	22.6	53.2	35.2	34		22.3667	40.8		0.701153	0.00316284	4.32199		P09793	Cytotoxic T-lymphocyte protein 4	CTLA4_MOUSE	Ctla4	4538	4273	4742	2842	3621	2998		4517.67	3153.67		-0.525169	0.0279451	0.00389741
	ENSMUSG00000037815	catenin (cadherin associated protein), alpha 1 [Source:MGI Symbol;Acc:MGI:88274]	Ctnna1	110	114.4	115.4	81.1	101.8	97.1		113.267	93.3333		-0.207097	0.0611621	1.90172		P26231	Catenin alpha-1	CTNA1_MOUSE	Ctnna1	23152	19782	21347	12449	15281	19168		21427	15632.7		-0.474297	0.0291707	0.0319015
	ENSMUSG00000006932	catenin (cadherin associated protein), beta 1 [Source:MGI Symbol;Acc:MGI:88276]	Ctnnb1	233.8	217.9	232	260.1	228.5	243.5		227.9	244.033		0.0719434	0.179983	1.00023		Q02248	Catenin beta-1	CTNB1_MOUSE	Ctnnb1	1029	306	203	14	159	270		512.667	147.667		-2.24423	0.054639	0.115897
	ENSMUSG00000027649	catenin, beta like 1 [Source:MGI Symbol;Acc:MGI:1913892]	Ctnnbl1	83.4	83.2	89.1	96	90.8	86.8		85.2333	91.2		0.0675303	0.220442	0.820684		Q9CWL8	Beta-catenin-like protein 1	CTBL1_MOUSE	Ctnnbl1	49650	41473	47831	41377	43653	39114		46318	41381.3		-0.159772	0.0686173	0.162796
	ENSMUSG00000028633	cytidine 5'-triphosphate synthase [Source:MGI Symbol;Acc:MGI:1858304]	Ctps	130.3	129.3	132.6	127.6	123.3	123.3		130.733	124.733		-0.0686968	0.234877	0.77106		P70698	CTP synthase 1	PYRG1_MOUSE	Ctps1	85929	76822	82515	61540	69386	67795		81755.3	66240.3		-0.303991	0.0279451	0.014097
	ENSMUSG00000031360	cytidine 5'-triphosphate synthase 2 [Source:MGI Symbol;Acc:MGI:1933185]	Ctps2	28.4	28.4	27.9	31.4	28.4	27.6		28.2333	29.1333		0.0280031	0.428969	0.260049		P70303	CTP synthase 2	PYRG2_MOUSE	Ctps2	35264	33196	31929	30577	30931	28008		33463	29838.7		-0.165578	0.0486508	0.0957881
	ENSMUSG00000005609	CTR9 homolog, Paf1/RNA polymerase II complex component [Source:MGI Symbol;Acc:MGI:109345]	Ctr9	37.2	38.8	40	39	39.8	37.8		38.6667	38.8667		0.00716325	0.532174	0.0547143		Q62018	RNA polymerase-associated protein CTR9 homolog	CTR9_MOUSE	Ctr9	16014	13414	14035	11810	13395	11692		14487.7	12299		-0.234959	0.0397948	0.0673306
	ENSMUSG00000017760	cathepsin A [Source:MGI Symbol;Acc:MGI:97748]	Ctsa	64.3	62.7	61.7	70.6	66.9	64.4		62.9	67.3		0.0992151	0.104591	1.45434		P16675	Lysosomal protective protein	PPGB_MOUSE	Ctsa	16799	15626	12453	12105	13594	14648		14959.3	13449		-0.146513	0.116109	0.341414
	ENSMUSG00000021939	cathepsin B [Source:MGI Symbol;Acc:MGI:88561]	Ctsb	71.1	74.7	74.7	74.5	78.8	74.3		73.5	75.8667		0.0651212	0.235912	0.767615		P10605	Cathepsin B	CATB_MOUSE	Ctsb	44279	51514	47304	32875	43663	40517		47699	39018.3		-0.297207	0.0389175	0.0642065
	ENSMUSG00000030560	cathepsin C [Source:MGI Symbol;Acc:MGI:109553]	Ctsc	58.9	60.9	61.1	65.9	62.8	64.5		60.3	64.4		0.0924205	0.134562	1.24454		P97821	Dipeptidyl peptidase 1	CATC_MOUSE	Ctsc	33987	35044	33501	28830	29829	28473		34177.3	29044		-0.234825	0.0279451	0.0161238
	ENSMUSG00000007891	cathepsin D [Source:MGI Symbol;Acc:MGI:88562]	Ctsd	554.4	587	547.6	333.9	465.8	475.5		563	425.067		-0.278671	0.0223659	2.71442		P18242	Cathepsin D	CATD_MOUSE	Ctsd	635910	702553	661681	331914	487554	513800		666715	444423		-0.609996	0.0279451	0.0144784
	ENSMUSG00000038642	cathepsin S [Source:MGI Symbol;Acc:MGI:107341]	Ctss	40.3	40.8	44.7	80.6	60.6	55.4		41.9333	65.5333		0.497393	0.00214645	4.73457		O70370	Cathepsin S	CATS_MOUSE	Ctss	8640	7857	8946	13488	11718	9630		8481	11612		0.441847	0.0279451	0.0203257
	ENSMUSG00000024910	cathepsin W [Source:MGI Symbol;Acc:MGI:1338045]	Ctsw	390.1	367	378.5	446.7	373	371.9		378.533	397.2		0.0203666	0.468089	0.177985		P56203	Cathepsin W	CATW_MOUSE	Ctsw	38292	35088	37089	31157	30660	27694		36823	29837		-0.304508	0.0279451	0.0119259
	ENSMUSG00000016256	cathepsin Z [Source:MGI Symbol;Acc:MGI:1891190]	Ctsz	112.9	116.5	117.7	122.8	121.8	122.7		115.7	122.433		0.0888931	0.164568	1.07772		Q9WUU7	Cathepsin Z	CATZ_MOUSE	Ctsz	26342	26131	46713	21549	42192	39683		33062	34474.7		0.0553867	0.23931	0.878261
	ENSMUSG00000038888	cytosolic thiouridylase subunit 1 [Source:MGI Symbol;Acc:MGI:2385277]	Ctu1	10.3	11.7	12.8	13.2	11.3	8.5		11.6	11		-0.23055	0.15743	1.11163		Q99J10	Cytoplasmic tRNA 2-thiolation protein 1	CTU1_MOUSE	Ctu1	5668	4472	4628	3087	3443	3528		4922.67	3352.67		-0.548476	0.0279451	0.00387825
	ENSMUSG00000049482	cytosolic thiouridylase subunit 2 [Source:MGI Symbol;Acc:MGI:1914215]	Ctu2	25.7	25.7	26.2	24.9	26	22.7		25.8667	24.5333		-0.070495	0.331174	0.487365		Q3U308	Cytoplasmic tRNA 2-thiolation protein 2	CTU2_MOUSE	Ctu2	12916	13301	13662	10163	11730	11888		13293	11260.3		-0.242609	0.0308361	0.0380298
	ENSMUSG00000029686	cullin 1 [Source:MGI Symbol;Acc:MGI:1349658]	Cul1	124.3	129.9	136	124.9	127.1	124		130.067	125.333		-0.0541812	0.290775	0.597745		Q9WTX6	Cullin-1	CUL1_MOUSE	Cul1	64226	55043	60021	47822	54647	49312		59763.3	50593.7		-0.239809	0.034013	0.0495457
	ENSMUSG00000024231	cullin 2 [Source:MGI Symbol;Acc:MGI:1918995]	Cul2	70.7	70.5	70	72.3	68.4	72.6		70.4	71.1		0.0233134	0.460883	0.192335		Q9D4H8	Cullin-2	CUL2_MOUSE	Cul2	39764	38361	35089	27388	30941	29955		37738	29428		-0.358754	0.0279451	0.00763855
	ENSMUSG00000004364	cullin 3 [Source:MGI Symbol;Acc:MGI:1347360]	Cul3	227	229.3	234.5	220.2	235.2	228.2		230.267	227.867		0.0115996	0.503426	0.10991		Q9JLV5	Cullin-3	CUL3_MOUSE	Cul3	53486	51482	51488	41203	44906	43617		52152	43242		-0.270973	0.0279451	0.0111851
	ENSMUSG00000031446	cullin 4A [Source:MGI Symbol;Acc:MGI:1914487]	Cul4a	19.7	19	20.4	22	19.2	18.9		19.7	20.0333		-0.0265164	0.449781	0.213884		Q3TCH7	Cullin-4A	CUL4A_MOUSE	Cul4a	4598	3857	3610	3139	3236	3456		4021.67	3277		-0.288955	0.0325775	0.0438064
	ENSMUSG00000031095	cullin 4B [Source:MGI Symbol;Acc:MGI:1919834]	Cul4b	76.1	71.5	77.8	82.5	78.4	76.1		75.1333	79		0.0519993	0.279284	0.631533		A2A432	Cullin-4B	CUL4B_MOUSE	Cul4b	33391	27128	27506	22808	24007	23717		29341.7	23510.7		-0.313357	0.0283715	0.0248708
	ENSMUSG00000032030	cullin 5 [Source:MGI Symbol;Acc:MGI:1922967]	Cul5	32.4	31.5	33.1	31	32.4	31		32.3333	31.4667		-0.0243611	0.44598	0.222668		Q9D5V5	Cullin-5	CUL5_MOUSE	Cul5	20473	18446	18922	16092	16487	15680		19280.3	16086.3		-0.260166	0.0279451	0.0161767
	ENSMUSG00000029559	RIKEN cDNA 2210016L21 gene [Source:MGI Symbol;Acc:MGI:1919607]	2210016L21Rik	21.3	22.8	22.5	23.8	21.3	20.2		22.2	21.7667		-0.0648831	0.330935	0.488076		Q3UY34	Protein CUSTOS	CSTOS_MOUSE	Custos	10515	10278	11878	9277	10482	9690		10890.3	9816.33		-0.148696	0.0705063	0.16985
	ENSMUSG00000024194	cutA divalent cation tolerance homolog [Source:MGI Symbol;Acc:MGI:1914925]	Cuta	62.2	68.7	66.3	58.3	64.5	58.8		65.7333	60.5333		-0.0865077	0.21237	0.850937		Q9CQ89	Protein CutA	CUTA_MOUSE	Cuta	20251	20754	20178	13502	17685	13263		20394.3	14816.7		-0.473686	0.0279451	0.0105312
	ENSMUSG00000029705	cut-like homeobox 1 [Source:MGI Symbol;Acc:MGI:88568]	Cux1	9.9	10.6	10.3	10.3	10.1	9.9		10.2667	10.1		-0.0203951	0.463902	0.187154		P53564-3	Isoform 3 of Homeobox protein cut-like 1	CUX1_MOUSE	Cux1	1017	928	824	696	804	774		923	758		-0.281467	0.0326224	0.0440713
	ENSMUSG00000004096	CWC15 spliceosome-associated protein [Source:MGI Symbol;Acc:MGI:1913320]	Cwc15	289.1	292.8	296.3	328.1	308	302.3		292.733	312.8		0.0821565	0.113946	1.38823		Q9JHS9	Spliceosome-associated protein CWC15 homolog	CWC15_MOUSE	Cwc15	33636	33114	35595	23979	32412	28359		34115	28250		-0.282339	0.0392243	0.0656063
	ENSMUSG00000027014	CWC22 spliceosome-associated protein [Source:MGI Symbol;Acc:MGI:2136773]	Cwc22	39.9	40.7	41.4	42	41.3	40.3		40.6667	41.2		0.0181065	0.463606	0.187765		Q8C5N3;Q8C5N3-2	Pre-mRNA-splicing factor CWC22 homolog;Isoform 2 of Pre-mRNA-splicing factor CWC22 homolog	CWC22_MOUSE	Cwc22	13992	12969	12595	10360	11310	10404		13185.3	10691.3		-0.302253	0.0279451	0.0112568
	ENSMUSG00000018541	CWC25 spliceosome-associated protein [Source:MGI Symbol;Acc:MGI:1914730]	Cwc25	26.3	30.3	26.8	27.7	28.8	28		27.8	28.1667		0.0639774	0.314378	0.530978		Q9DBF7	Pre-mRNA-splicing factor CWC25 homolog	CWC25_MOUSE	Cwc25	4257	4420	3993	3614	3901	3622		4223.33	3712.33		-0.18571	0.0382282	0.062391
	ENSMUSG00000021715	CWC27 spliceosome-associated protein [Source:MGI Symbol;Acc:MGI:1914535]	Cwc27	37.9	38.6	40	43.6	38.3	34.6		38.8333	38.8333		-0.0642125	0.328973	0.493076		Q3TKY6	Spliceosome-associated protein CWC27 homolog	CWC27_MOUSE	Cwc27	15534	17365	18226	15979	17012	17156		17041.7	16715.7		-0.0253889	0.221195	0.790012
	ENSMUSG00000025200	CWF19-like 1, cell cycle control (S. pombe) [Source:MGI Symbol;Acc:MGI:1919752]	Cwf19l1	20.3	19.9	21.5	21.4	20.5	20.7		20.5667	20.8667		0.00526911	0.541427	0.0362634		Q8CI33	CWF19-like protein 1	C19L1_MOUSE	Cwf19l1	25330	25213	24189	20010	22087	20997		24910.7	21031.3		-0.245088	0.0279451	0.0190673
	ENSMUSG00000025898	CWF19-like 2, cell cycle control (S. pombe) [Source:MGI Symbol;Acc:MGI:1918023]	Cwf19l2	12.7	10.7	11.6	11.4	12.1	11.6		11.6667	11.7		0.0460613	0.393886	0.336304		Q8BG79	CWF19-like protein 2	C19L2_MOUSE	Cwf19l2	1538	1567	1546	1362	1607	1267		1550.33	1412		-0.142029	0.0880181	0.232467
	ENSMUSG00000050232	chemokine (C-X-C motif) receptor 3 [Source:MGI Symbol;Acc:MGI:1277207]	Cxcr3	52.5	42.2	57.6	108.6	60.9	68.5		50.7667	79.3333		0.376399	0.0497577	2.06611		O88410	C-X-C chemokine receptor type 3	CXCR3_MOUSE	Cxcr3	330	401	564	1024	830	640		431.667	831.333		0.955188	0.0279451	0.00941228
	ENSMUSG00000045382	chemokine (C-X-C motif) receptor 4 [Source:MGI Symbol;Acc:MGI:109563]	Cxcr4	7.3	5.4	8	28.4	13.8	12.4		6.9	18.2		0.984357	0.00320419	4.27865		P70658;P70658-2	C-X-C chemokine receptor type 4;Isoform CXCR4-A of C-X-C chemokine receptor type 4	CXCR4_MOUSE	Cxcr4	0	52	0	24	85	69		17.3333	59.3333		0.00051958	0.263496	0.999519
	ENSMUSG00000048521	chemokine (C-X-C motif) receptor 6 [Source:MGI Symbol;Acc:MGI:1934582]	Cxcr6	251.2	243.1	258.2	288.7	257.9	293.3		250.833	279.967		0.140614	0.199326	0.908913		Q9EQ16	C-X-C chemokine receptor type 6	CXCR6_MOUSE	Cxcr6	2368	1904	1727	1262	1652	1535		1999.67	1483		-0.427602	0.0305309	0.0370628
	ENSMUSG00000024560	CXXC finger 1 (PHD domain) [Source:MGI Symbol;Acc:MGI:1921572]	Cxxc1	75.1	78.2	78.6	90.5	76.2	73.9		77.3	80.2		-0.00675377	0.53409	0.0501806		Q9CWW7	CXXC-type zinc finger protein 1	CXXC1_MOUSE	Cxxc1	4565	4585	5096	4523	4772	4675		4748.67	4656.67		-0.0266872	0.213613	0.754354
	ENSMUSG00000024646	cytochrome b5 type A (microsomal) [Source:MGI Symbol;Acc:MGI:1926952]	Cyb5a	98	99	96.1	110	103.3	101.4		97.7	104.9		0.102168	0.0881646	1.60234		P56395	Cytochrome b5	CYB5_MOUSE	Cyb5a	160776	169358	151476	135226	153467	115778		160537	134824		-0.259852	0.0435145	0.0797051
	ENSMUSG00000031924	cytochrome b5 type B [Source:MGI Symbol;Acc:MGI:1913677]	Cyb5b	248.7	250.5	257	228.1	234.8	243.8		252.067	235.567		-0.0746883	0.249623	0.724465		Q9CQX2	Cytochrome b5 type B	CYB5B_MOUSE	Cyb5b	157794	177499	187544	118615	153356	122542		174279	131504		-0.412212	0.0279451	0.0200537
	ENSMUSG00000026456	cytochrome b5 reductase 1 [Source:MGI Symbol;Acc:MGI:1919267]	Cyb5r1	25.7	23.1	24.5	20.4	21.7	21.7		24.4333	21.2667		-0.160031	0.0461768	2.1354		Q9DB73	NADH-cytochrome b5 reductase 1	NB5R1_MOUSE	Cyb5r1	15390	11299	14680	10634	12884	15681		13789.7	13066.3		-0.0829193	0.195491	0.672586
	ENSMUSG00000018042	cytochrome b5 reductase 3 [Source:MGI Symbol;Acc:MGI:94893]	Cyb5r3	44.6	43.2	43.7	45.4	42.1	39.7		43.8333	42.4		-0.0650587	0.243929	0.740512		Q9DCN2;Q9DCN2-2	NADH-cytochrome b5 reductase 3;Isoform 2 of NADH-cytochrome b5 reductase 3	NB5R3_MOUSE	Cyb5r3	93983	86123	86987	66597	80700	79505		89031	75600.7		-0.240176	0.0377253	0.0608058
	ENSMUSG00000032872	cytochrome b5 reductase 4 [Source:MGI Symbol;Acc:MGI:2386848]	Cyb5r4	54.4	53.8	53.3	52.3	56.7	54.5		53.8333	54.5		0.0610833	0.269701	0.659609		Q3TDX8	Cytochrome b5 reductase 4	NB5R4_MOUSE	Cyb5r4	18951	17141	14301	12945	12290	17888		16797.7	14374.3		-0.235656	0.0907396	0.243258
	ENSMUSG00000006519	cytochrome b-245, alpha polypeptide [Source:MGI Symbol;Acc:MGI:1316658]	Cyba	721.5	838.1	783.7	793.8	793.1	797.1		781.1	794.667		0.0404903	0.443605	0.227965		Q61462	Cytochrome b-245 light chain	CY24A_MOUSE	Cyba	45357	47817	46729	29921	39592	38195		46634.3	35902.7		-0.387805	0.0279451	0.0210773
	ENSMUSG00000039294	cytochrome b 245 chaperone 1 [Source:MGI Symbol;Acc:MGI:2384959]	Cybc1	53.6	57.3	52.3	53	53.7	52.8		54.4	53.1667		0.00562553	0.540284	0.0382873		Q3TYS2	Cytochrome b-245 chaperone 1	CYBC1_MOUSE	Cybc1	65282	64282	56347	44835	52410	55870		61970.3	51038.3		-0.282966	0.0345048	0.0507962
	ENSMUSG00000022551	cytochrome c-1 [Source:MGI Symbol;Acc:MGI:1913695]	Cyc1	227.9	242	242.4	257.5	242.9	242.8		237.433	247.733		0.0480398	0.349394	0.442062		Q9D0M3;Q9D0M3-2	Cytochrome c1, heme protein, mitochondrial;Isoform 2 of Cytochrome c1, heme protein, mitochondrial	CY1_MOUSE	Cyc1	87365	87227	88246	69376	73373	77921		87612.7	73556.7		-0.253888	0.0279451	0.0174117
	ENSMUSG00000063694	cytochrome c, somatic [Source:MGI Symbol;Acc:MGI:88578]	Cycs	92.5	95.7	97.7	82	94.3	91.5		95.3	89.2667		-0.0470102	0.391723	0.34067		P62897	Cytochrome c, somatic	CYC_MOUSE	Cycs	573436	600814	583588	432705	503358	468411		585946	468158		-0.326253	0.0279451	0.00912684
	ENSMUSG00000030447	cytoplasmic FMR1 interacting protein 1 [Source:MGI Symbol;Acc:MGI:1338801]	Cyfip1	8.9	7.9	8	5.6	7.4	6.7		8.26667	6.56667		-0.217186	0.0863803	1.61939		Q7TMB8	Cytoplasmic FMR1-interacting protein 1	CYFP1_MOUSE	Cyfip1	34723	31438	29180	24885	26814	26733		31780.3	26144		-0.278832	0.0283715	0.025295
	ENSMUSG00000020340	cytoplasmic FMR1 interacting protein 2 [Source:MGI Symbol;Acc:MGI:1924134]	Cyfip2	357.3	349.7	374.1	379	350.9	335.9		360.367	355.267		-0.0533028	0.247371	0.731148		Q5SQX6	Cytoplasmic FMR1-interacting protein 2	CYFP2_MOUSE	Cyfip2	65118	54719	53631	45949	48103	47434		57822.7	47162		-0.288695	0.0287318	0.0281071
	ENSMUSG00000053929	cysteine and histidine rich 1 [Source:MGI Symbol;Acc:MGI:1859320]	Cyhr1	17.6	16.1	15.9	18	17.9	15.8		16.5333	17.2333		0.0766311	0.264235	0.675494		Q9QXA1	Cysteine and histidine-rich protein 1	CYHR1_MOUSE	Cyhr1	2877	2135	1302	1500	1338	1452		2104.67	1430		-0.485483	0.061352	0.138167
	ENSMUSG00000036712	CYLD lysine 63 deubiquitinase [Source:MGI Symbol;Acc:MGI:1921506]	Cyld	34.4	32.2	34.9	38.9	34.6	35.3		33.8333	36.2667		0.0667888	0.23645	0.765835		Q80TQ2;Q80TQ2-2	Ubiquitin carboxyl-terminal hydrolase CYLD;Isoform 1 of Ubiquitin carboxyl-terminal hydrolase CYLD	CYLD_MOUSE	Cyld	7669	7693	8094	6555	7096	6801		7818.67	6817.33		-0.19803	0.0310441	0.0389517
	ENSMUSG00000049439	cytochrome P450, family 20, subfamily a, polypeptide 1 [Source:MGI Symbol;Acc:MGI:1925201]	Cyp20a1	50.7	46.5	51.5	47.5	49	52.2		49.5667	49.5667		0.017494	0.509017	0.0973591		Q8BKE6	Cytochrome P450 20A1	CP20A_MOUSE	Cyp20a1	131935	129545	116453	75239	101723	100422		125978	92461.3		-0.457585	0.0279451	0.0180568
	ENSMUSG00000001467	cytochrome P450, family 51 [Source:MGI Symbol;Acc:MGI:106040]	Cyp51	327	357.3	340.1	297.6	343.5	339.9		341.467	327		0.000122264	0.561067	0.000515675		Q8K0C4	Lanosterol 14-alpha demethylase	CP51A_MOUSE	Cyp51a1	135648	150534	133933	88783	109633	120363		140038	106260		-0.40768	0.0279451	0.0221601
	ENSMUSG00000020589	CYFIP related Rac1 interactor A [Source:MGI Symbol;Acc:MGI:1261783]	Cyria	4.6	4.1	4.9	6.8	5.7	5.2		4.53333	5.9		0.28479	0.0373269	2.31205		Q8BHZ0	CYFIP-related Rac1 interactor A	CYRIA_MOUSE	Cyria	51525	49998	48860	41933	45654	49729		50127.7	45772		-0.134294	0.0757553	0.188682
	ENSMUSG00000022378	CYFIP related Rac1 interactor B [Source:MGI Symbol;Acc:MGI:1923520]	Cyrib	94.5	94.6	93.2	96.3	97.6	97.4		94.1	97.1		0.0699418	0.182418	0.988108		Q921M7	CYFIP-related Rac1 interactor B	CYRIB_MOUSE	Cyrib	363164	359499	371463	288998	330402	323272		364709	314224		-0.217266	0.0317322	0.0411638
	ENSMUSG00000017132	cytohesin 1 [Source:MGI Symbol;Acc:MGI:1334257]	Cyth1	48.4	48.2	51.6	76.6	53.3	54.4		49.4	61.4333		0.169839	0.097924	1.51211		Q9QX11;Q9QX11-2	Cytohesin-1;Isoform 2 of Cytohesin-1	CYH1_MOUSE	Cyth1	10225	6398	8126	9019	7585	7460		8249.67	8021.33		-0.0196343	0.247939	0.919999
	ENSMUSG00000018008	cytohesin 4 [Source:MGI Symbol;Acc:MGI:2441702]	Cyth4	112	96.8	102.2	92.1	85.8	95.5		103.667	91.1333		-0.169509	0.0491	2.07791		Q80YW0	Cytohesin-4	CYH4_MOUSE	Cyth4	15638	14561	16346	13773	14797	14560		15515	14376.7		-0.108982	0.0880181	0.232494
	ENSMUSG00000026832	cytohesin 1 interacting protein [Source:MGI Symbol;Acc:MGI:2183535]	Cytip	72.3	66.8	74.3	109.9	84.3	83.6		71.1333	92.6		0.27624	0.00988112	3.3754		Q91VY6	Cytohesin-interacting protein	CYTIP_MOUSE	Cytip	4430	1909	1918	4450	4194	3379		2752.33	4007.67		0.653001	0.0535256	0.11243
	ENSMUSG00000028608	CXXC motif containing zinc binding protein [Source:MGI Symbol;Acc:MGI:1921348]	Czib	16.2	15.8	15.8	15.3	14.4	15.1		15.9333	14.9333		-0.0846902	0.23075	0.783208		Q8BHG2;Q8BHG2-3	CXXC motif containing zinc binding protein;Isoform 3 of CXXC motif containing zinc binding protein	CZIB_MOUSE	Czib	47142	44673	46238	34937	38614	38834		46017.7	37461.7		-0.298098	0.0279451	0.0101163
	ENSMUSG00000020255	DNA segment, Chr 10, Wayne State University 102, expressed [Source:MGI Symbol;Acc:MGI:106381]	D10Wsu102e	3.5	3.7	3.5	3.3	3.7	3.7		3.56667	3.56667		0.0554711	0.318568	0.520635		Q9CX66	Uncharacterized protein C12orf45 homolog	CL045_MOUSE	D10Wsu102e	5917	8801	7129	5737	7058	7096		7282.33	6630.33		-0.123224	0.155845	0.501069
	ENSMUSG00000030347	DNA segment, Chr 6, Wayne State University 163, expressed [Source:MGI Symbol;Acc:MGI:107893]	D6Wsu163e	11.9	11.1	12.2	12.2	10.9	12.4		11.7333	11.8333		-0.00812982	0.539234	0.0404937		Q91YN0	Protein C12orf4 homolog	CL004_MOUSE	D6Wsu163e	1248	1204	1200	910	933	892		1217.33	911.667		-0.417162	0.0279451	0.00103861
	ENSMUSG00000019362	DNA segment, Chr 8, ERATO Doi 738, expressed [Source:MGI Symbol;Acc:MGI:1289231]	D8Ertd738e	399.9	425.1	433.5	397.9	439.7	409.4		419.5	415.667		0.0110281	0.530852	0.057465		Q8R1F0	Leydig cell tumor 10 kDa protein homolog	L10K_MOUSE	D8Ertd738e	1570	1874	2117	1504	1499	1216		1853.67	1406.33		-0.394653	0.0305656	0.0372008
	ENSMUSG00000022174	defender against cell death 1 [Source:MGI Symbol;Acc:MGI:101912]	Dad1	72.7	82.6	74.2	74.3	78.5	74.3		76.5	75.7		0.0267231	0.459029	0.195959		P61804	Dolichyl-diphosphooligosaccharide--protein glycosyltransferase subunit DAD1	DAD1_MOUSE	Dad1	175629	177774	175680	112725	161753	129214		176361	134564		-0.406388	0.0287665	0.0282711
	ENSMUSG00000039206	diacylglycerol lipase, beta [Source:MGI Symbol;Acc:MGI:2442032]	Daglb	2.1	2.3	2.5	2.8	2.3	2.1		2.3	2.4		-0.0730501	0.404066	0.314224		Q91WC9	Diacylglycerol lipase-beta	DGLB_MOUSE	Daglb	1390	698	513	419	498	326		867	414.333		-0.957077	0.0333057	0.0466231
	ENSMUSG00000019039	DALR anticodon binding domain containing 3 [Source:MGI Symbol;Acc:MGI:1915039]	Dalrd3	36	34.1	32.8	34.8	32.2	30.3		34.3	32.4333		-0.0740224	0.324968	0.50467		Q6PJN8	DALR anticodon-binding domain-containing protein 3	DALD3_MOUSE	Dalrd3	1294	1156	1102	626	831	1315		1184	924		-0.422962	0.0700985	0.168135
	ENSMUSG00000039168	death-associated protein [Source:MGI Symbol;Acc:MGI:1918190]	Dap	299.6	324.8	332.7	324.7	333.9	323.1		319.033	327.233		0.0397863	0.382944	0.361212		Q91XC8	Death-associated protein 1	DAP1_MOUSE	Dap	27915	41931	21904	18210	26103	21184		30583.3	21832.3		-0.449444	0.061834	0.139625
	ENSMUSG00000068921	death associated protein 3 [Source:MGI Symbol;Acc:MGI:1929538]	Dap3	26.7	27.3	26.4	30	27.8	26.7		26.8	28.1667		0.0642741	0.224109	0.806935		Q9ER88	28S ribosomal protein S29, mitochondrial	RT29_MOUSE	Dap3	32488	27201	30525	25975	27597	27184		30071.3	26918.7		-0.156388	0.0635774	0.145268
	ENSMUSG00000032380	death-associated protein kinase 2 [Source:MGI Symbol;Acc:MGI:1341297]	Dapk2	8.7	8.7	9.8	9.3	9.5	11.4		9.06667	10.0667		0.160348	0.224711	0.804655		Q8VDF3	Death-associated protein kinase 2	DAPK2_MOUSE	Dapk2	14007	13464	11607	10225	12275	12102		13026	11534		-0.175727	0.0752038	0.186135
	ENSMUSG00000034974	death-associated protein kinase 3 [Source:MGI Symbol;Acc:MGI:1203520]	Dapk3	27.9	26.6	27.2	30.5	27.8	26.7		27.2333	28.3333		0.0364472	0.417522	0.286173		O54784	Death-associated protein kinase 3	DAPK3_MOUSE	Dapk3	3041	3315	3272	2402	2981	2635		3209.33	2672.67		-0.268631	0.0321592	0.0426053
	ENSMUSG00000026356	aspartyl-tRNA synthetase [Source:MGI Symbol;Acc:MGI:2442544]	Dars	150	157.8	158.1	153.5	165.5	157.8		155.3	158.933		0.0608085	0.289514	0.600389		Q922B2	Aspartate--tRNA ligase, cytoplasmic	SYDC_MOUSE	Dars1	569415	558824	607039	447543	527047	492494		578426	489028		-0.244533	0.0308361	0.0380399
	ENSMUSG00000026709	aspartyl-tRNA synthetase 2 (mitochondrial) [Source:MGI Symbol;Acc:MGI:2442510]	Dars2	7.4	7.3	8.5	8.5	8.2	8.7		7.73333	8.46667		0.0979334	0.330574	0.489605		Q8BIP0	Aspartate--tRNA ligase, mitochondrial	SYDM_MOUSE	Dars2	1256	1181	1413	1785	1563	1223		1283.33	1523.67		0.234353	0.0767146	0.192227
	ENSMUSG00000002307	Fas death domain-associated protein [Source:MGI Symbol;Acc:MGI:1197015]	Daxx	69.1	66.1	70.5	69	65.2	67.6		68.5667	67.2667		-0.0381115	0.378074	0.372779		O35613	Death domain-associated protein 6	DAXX_MOUSE	Daxx	6560	5080	5602	5739	6053	6535		5747.33	6109		0.0940569	0.145934	0.460046
	ENSMUSG00000069565	DAZ associated protein 1 [Source:MGI Symbol;Acc:MGI:1917498]	Dazap1	195.2	204.2	214.4	225.1	212.7	195.9		204.6	211.233		0.00927567	0.531348	0.0567366		Q9JII5;Q9JII5-2	DAZ-associated protein 1;Isoform 2 of DAZ-associated protein 1	DAZP1_MOUSE	Dazap1	126433	146227	135379	111163	129053	130712		136013	123643		-0.138852	0.0870719	0.228535
	ENSMUSG00000026385	diazepam binding inhibitor [Source:MGI Symbol;Acc:MGI:94865]	Dbi	248.8	263.2	247.1	253.5	255.8	251.1		253.033	253.467		0.030548	0.469353	0.17572		P31786	Acyl-CoA-binding protein	ACBP_MOUSE	Dbi	306866	297981	272646	273578	217363	177577		292498	222839		-0.413118	0.0337336	0.0485523
	ENSMUSG00000020476	drebrin-like [Source:MGI Symbol;Acc:MGI:700006]	Dbnl	303.8	314.9	330.1	370.2	327.8	334		316.267	344		0.0783342	0.211174	0.855229		Q62418;Q62418-2;Q62418-3	Drebrin-like protein;Isoform 2 of Drebrin-like protein;Isoform 3 of Drebrin-like protein	DBNL_MOUSE	Dbnl	217662	221632	228362	185446	205634	207351		222552	199477		-0.159475	0.0489744	0.0966934
	ENSMUSG00000032469	debranching RNA lariats 1 [Source:MGI Symbol;Acc:MGI:1931520]	Dbr1	62.1	59.3	62.2	61.5	63.3	61.7		61.2	62.1667		0.0387903	0.372192	0.384662		Q923B1	Lariat debranching enzyme	DBR1_MOUSE	Dbr1	11519	12043	13958	11166	12055	10629		12506.7	11283.3		-0.145518	0.0835038	0.215768
	ENSMUSG00000000340	dihydrolipoamide branched chain transacylase E2 [Source:MGI Symbol;Acc:MGI:105386]	Dbt	46.8	48	48.4	33.7	42	40		47.7333	38.5667		-0.23479	0.0142872	3.05237		P53395	Lipoamide acyltransferase component of branched-chain alpha-keto acid dehydrogenase complex, mitochondrial	ODB2_MOUSE	Dbt	29350	27437	26316	17240	21158	22108		27701	20168.7		-0.464631	0.0279451	0.0078958
	ENSMUSG00000040325	DDB1 and CUL4 associated factor 1 [Source:MGI Symbol;Acc:MGI:2445220]	Dcaf1	54	55.8	56.2	60.5	59.4	54.3		55.3333	58.0667		0.0586717	0.231146	0.781719		Q80TR8;Q80TR8-4	DDB1- and CUL4-associated factor 1;Isoform 4 of DDB1- and CUL4-associated factor 1	DCAF1_MOUSE	Dcaf1	13849	13487	13582	11104	12820	12638		13639.3	12187.3		-0.165268	0.0514605	0.104927
	ENSMUSG00000022214	DDB1 and CUL4 associated factor 11 [Source:MGI Symbol;Acc:MGI:90168]	Dcaf11	21.5	21.4	21.4	18	19.5	19.4		21.4333	18.9667		-0.133033	0.0816439	1.66605		Q91VU6;Q91VU6-2	DDB1- and CUL4-associated factor 11;Isoform 2 of DDB1- and CUL4-associated factor 11	DCA11_MOUSE	Dcaf11	449	352	318	209	276	264		373	249.667		-0.574203	0.0279451	0.0155668
	ENSMUSG00000022300	DDB1 and CUL4 associated factor 13 [Source:MGI Symbol;Acc:MGI:2684929]	Dcaf13	39	40.1	39.6	36.8	38	40.5		39.5667	38.4333		-0.00687666	0.537385	0.0440309		Q6PAC3	DDB1- and CUL4-associated factor 13	DCA13_MOUSE	Dcaf13	38916	39674	38909	30350	34701	32826		39166.3	32625.7		-0.265716	0.0279451	0.0173953
	ENSMUSG00000049106	DDB1 and CUL4 associated factor 5 [Source:MGI Symbol;Acc:MGI:2444785]	Dcaf5	48.5	45.8	48.5	48.1	45.7	43.5		47.6	45.7667		-0.0724836	0.192566	0.94079		Q80T85	DDB1- and CUL4-associated factor 5	DCAF5_MOUSE	Dcaf5	2538	2897	2852	2037	2497	2293		2762.33	2275.67		-0.282116	0.0316535	0.0407886
	ENSMUSG00000049354	DDB1 and CUL4 associated factor 7 [Source:MGI Symbol;Acc:MGI:1919083]	Dcaf7	123.5	116.7	125.8	135.2	126.8	121.5		122	127.833		0.042916	0.333649	0.481189		P61963	DDB1- and CUL4-associated factor 7	DCAF7_MOUSE	Dcaf7	13195	13970	15849	14132	14591	13761		14338	14161.3		-0.0140285	0.24112	0.887148
	ENSMUSG00000026554	DDB1 and CUL4 associated factor 8 [Source:MGI Symbol;Acc:MGI:91860]	Dcaf8	20.5	19.1	20.1	21.9	18.1	17.7		19.9	19.2333		-0.108168	0.16478	1.07672		Q8N7N5	DDB1- and CUL4-associated factor 8	DCAF8_MOUSE	Dcaf8	13617	13501	13104	10733	12662	12703		13407.3	12032.7		-0.160251	0.0625767	0.142193
	ENSMUSG00000020935	dephospho-CoA kinase domain containing [Source:MGI Symbol;Acc:MGI:1915337]	Dcakd	24.8	27	26.5	30.6	23.8	25.6		26.1	26.6667		-0.0444241	0.420016	0.27941		Q8BHC4	Dephospho-CoA kinase domain-containing protein	DCAKD_MOUSE	Dcakd	12071	10589	8968	7499	8358	8336		10542.7	8064.33		-0.377848	0.0284641	0.0261968
	ENSMUSG00000029366	deoxycytidine kinase [Source:MGI Symbol;Acc:MGI:102726]	Dck	91.5	86.7	96.4	122.5	102.2	102.1		91.5333	108.933		0.1789	0.0238933	2.6592		P43346	Deoxycytidine kinase	DCK_MOUSE	Dck	82083	55407	69786	67002	61983	56333		69092	61772.7		-0.146677	0.130959	0.399065
	ENSMUSG00000021962	decapping mRNA 1A [Source:MGI Symbol;Acc:MGI:1923151]	Dcp1a	41.6	37	40	37.7	38.7	36.9		39.5333	37.7667		-0.0495415	0.286685	0.608658		Q91YD3	mRNA-decapping enzyme 1A	DCP1A_MOUSE	Dcp1a	17339	14191	13016	11128	11584	12157		14848.7	11623		-0.343723	0.0293466	0.0327428
	ENSMUSG00000041477	decapping mRNA 1B [Source:MGI Symbol;Acc:MGI:2442404]	Dcp1b	5.1	5	5	6.6	4.6	4.9		5.03333	5.36667		-0.00949368	0.540653	0.0377995		Q3U564;Q3U564-2	mRNA-decapping enzyme 1B;Isoform 2 of mRNA-decapping enzyme 1B	DCP1B_MOUSE	Dcp1b	597	478	371	302	370	394		482	355.333		-0.421964	0.0432407	0.0788604
	ENSMUSG00000024472	decapping mRNA 2 [Source:MGI Symbol;Acc:MGI:1917890]	Dcp2	49.3	41.6	48.7	50.4	44.6	44.3		46.5333	46.4333		-0.0481489	0.363296	0.406447		Q9CYC6	m7GpppN-mRNA hydrolase	DCP2_MOUSE	Dcp2	9899	9655	11467	9315	10298	2041		10340.3	7218		-0.828284	0.088171	0.233284
	ENSMUSG00000032040	decapping enzyme, scavenger [Source:MGI Symbol;Acc:MGI:1916555]	Dcps	170.1	183.5	177.2	200.7	182.4	191.3		176.933	191.467		0.103322	0.118541	1.35292		Q9DAR7	m7GpppX diphosphatase	DCPS_MOUSE	Dcps	265734	230219	220083	188285	211031	213416		238679	204244		-0.222332	0.0438341	0.0807736
	ENSMUSG00000031865	dynactin 1 [Source:MGI Symbol;Acc:MGI:107745]	Dctn1	58.2	62.5	67.5	72.6	61.4	61.9		62.7333	65.3		-0.0176035	0.500733	0.115596		O08788;O08788-2	Dynactin subunit 1;Isoform 2 of Dynactin subunit 1	DCTN1_MOUSE	Dctn1	349461	345939	52093	38016	350565	69094		249164	152558		-0.924606	0.137943	0.426619
	ENSMUSG00000025410	dynactin 2 [Source:MGI Symbol;Acc:MGI:107733]	Dctn2	79.3	79.1	79	80	80.5	81		79.1333	80.5		0.0460096	0.294076	0.587092		Q99KJ8	Dynactin subunit 2	DCTN2_MOUSE	Dctn2	100398	91625	101308	80058	90543	86976		97777	85859		-0.187937	0.0425714	0.0769404
	ENSMUSG00000028447	dynactin 3 [Source:MGI Symbol;Acc:MGI:1859251]	Dctn3	144.2	166.9	154.7	152.2	155.8	163.9		155.267	157.3		0.0535672	0.402085	0.319192		Q9Z0Y1	Dynactin subunit 3	DCTN3_MOUSE	Dctn3	34858	35963	35176	29933	31157	27631		35332.3	29573.7		-0.258338	0.0279451	0.0177252
	ENSMUSG00000024603	dynactin 4 [Source:MGI Symbol;Acc:MGI:1914915]	Dctn4	19.1	20.1	20.1	21.8	21.3	19.8		19.7667	20.9667		0.0763179	0.198244	0.915748		Q8CBY8;Q8CBY8-2	Dynactin subunit 4;Isoform 2 of Dynactin subunit 4	DCTN4_MOUSE	Dctn4	29658	29174	25453	21351	18634	26413		28095	22132.7		-0.355817	0.0355012	0.053974
	ENSMUSG00000030868	dynactin 5 [Source:MGI Symbol;Acc:MGI:1891689]	Dctn5	97.1	92.7	93.4	91.9	88	84.6		94.4	88.1667		-0.0969666	0.120732	1.33546		Q9QZB9	Dynactin subunit 5	DCTN5_MOUSE	Dctn5	18688	17460	18355	13975	16668	19354		18167.7	16665.7		-0.136593	0.115866	0.340509
	ENSMUSG00000031516	dynactin 6 [Source:MGI Symbol;Acc:MGI:1343154]	Dctn6	65.3	61.3	60.7	62.9	61.4	58.3		62.4333	60.8667		-0.0206037	0.473375	0.16757		Q9WUB4	Dynactin subunit 6	DCTN6_MOUSE	Dctn6	19347	19236	19979	14977	17806	16597		19520.7	16460		-0.249456	0.0294706	0.0332139
	ENSMUSG00000042462	dCTP pyrophosphatase 1 [Source:MGI Symbol;Acc:MGI:1913672]	Dctpp1	189.7	225.4	216.8	243.5	214.9	227.7		210.633	228.7		0.086143	0.30969	0.544058		Q9QY93	dCTP pyrophosphatase 1	DCTP1_MOUSE	Dctpp1	5421	5469	4792	3947	4101	3082		5227.33	3710		-0.503288	0.0279451	0.00977805
	ENSMUSG00000027708	DCN1, defective in cullin neddylation 1, domain containing 1 (S. cerevisiae) [Source:MGI Symbol;Acc:MGI:2150386]	Dcun1d1	13.8	14	14.4	14.7	13.7	14.9		14.0667	14.4333		0.0317968	0.438342	0.238499		Q9QZ73	DCN1-like protein 1	DCNL1_MOUSE	Dcun1d1	27404	27022	28045	21696	23467	23383		27490.3	22848.7		-0.267581	0.0279451	0.0116296
	ENSMUSG00000048787	DCN1, defective in cullin neddylation 1, domain containing 3 (S. cerevisiae) [Source:MGI Symbol;Acc:MGI:2679003]	Dcun1d3	21.9	19.3	19.7	16.7	18.8	18.2		20.3	17.9		-0.110866	0.148064	1.16727		Q8K0V2	DCN1-like protein 3	DCNL3_MOUSE	Dcun1d3	4640	3879	3173	1457	2762	2486		3897.33	2235		-0.837706	0.0281378	0.022862
	ENSMUSG00000032002	DCN1, defective in cullin neddylation 1, domain containing 5 (S. cerevisiae) [Source:MGI Symbol;Acc:MGI:1924113]	Dcun1d5	115.1	116.1	113.5	113	118.2	121.4		114.9	117.533		0.0740772	0.226734	0.797202		Q9CXV9	DCN1-like protein 5	DCNL5_MOUSE	Dcun1d5	25871	20937	23235	22093	23200	22477		23347.7	22590		-0.0425089	0.198329	0.685283
	ENSMUSG00000039450	dicarbonyl L-xylulose reductase [Source:MGI Symbol;Acc:MGI:1915130]	Dcxr	13.6	15.5	13.3	11.1	14.4	11.9		14.1333	12.4667		-0.0679818	0.443766	0.227429		Q91X52	L-xylulose reductase	DCXR_MOUSE	Dcxr	5361	4523	4526	2842	3597	53204		4803.33	19881		0.769715	0.159289	0.515143
	ENSMUSG00000074247	DET1 and DDB1 associated 1 [Source:MGI Symbol;Acc:MGI:1913748]	Dda1	96.9	108.1	105.2	93.8	100.9	94.8		103.4	96.5		-0.075363	0.247184	0.731802		Q9D9Z5	DET1- and DDB1-associated protein 1	DDA1_MOUSE	Dda1	39508	36652	37943	27793	29969	27923		38034.3	28561.7		-0.413408	0.0279451	0.00176812
	ENSMUSG00000024740	damage specific DNA binding protein 1 [Source:MGI Symbol;Acc:MGI:1202384]	Ddb1	294.6	308.1	314.1	306	307.3	293.2		305.6	302.167		-0.0170628	0.473052	0.168131		Q3U1J4	DNA damage-binding protein 1	DDB1_MOUSE	Ddb1	185663	176330	176639	141856	155681	149486		179544	149008		-0.269579	0.0279451	0.0127531
	ENSMUSG00000002109	damage specific DNA binding protein 2 [Source:MGI Symbol;Acc:MGI:1355314]	Ddb2	26.5	22.3	22.8	35.3	22.8	22.1		23.8667	26.7333		0.0262224	0.509204	0.0966935		Q99J79	DNA damage-binding protein 2	DDB2_MOUSE	Ddb2	8090	7268	7629	8101	8235	7928		7662.33	8088		0.0792112	0.117299	0.346004
	ENSMUSG00000061313	DDHD domain containing 2 [Source:MGI Symbol;Acc:MGI:1919358]	Ddhd2	22.7	20	20.8	21.3	19.5	18.7		21.1667	19.8333		-0.101108	0.124132	1.30997		Q80Y98	Phospholipase DDHD2	DDHD2_MOUSE	Ddhd2	1490	1611	1233	887	1078	976		1444.67	980.333		-0.555042	0.0279451	0.00589937
	ENSMUSG00000078515	DNA-damage inducible protein 2 [Source:MGI Symbol;Acc:MGI:1917244]	Ddi2	28.5	26.6	28.4	30.4	28.3	27.6		27.8333	28.7667		0.0286205	0.412287	0.297112		A2ADY9	Protein DDI1 homolog 2	DDI2_MOUSE	Ddi2	31363	31078	35708	27874	31276	30774		32716.3	29974.7		-0.125172	0.0892839	0.237549
	ENSMUSG00000028757	dolichyl-di-phosphooligosaccharide-protein glycotransferase [Source:MGI Symbol;Acc:MGI:1194508]	Ddost	454	496	483.1	430.5	473.2	459.7		477.7	454.467		-0.0332756	0.427456	0.263097		O54734	Dolichyl-diphosphooligosaccharide--protein glycosyltransferase 48 kDa subunit	OST48_MOUSE	Ddost	412869	366072	339056	252477	321395	294008		372666	289293		-0.36766	0.0285578	0.0271574
	ENSMUSG00000068290	DDRGK domain containing 1 [Source:MGI Symbol;Acc:MGI:1924256]	Ddrgk1	85	86.5	86.5	88.9	89.3	83.8		86	87.3333		0.0283374	0.437079	0.241979		Q80WW9	DDRGK domain-containing protein 1	DDRGK_MOUSE	Ddrgk1	13913	14166	12594	9170	11303	12438		13557.7	10970.3		-0.31505	0.0359991	0.0554939
	ENSMUSG00000001666	D-dopachrome tautomerase [Source:MGI Symbol;Acc:MGI:1298381]	Ddt	20.6	18.8	21.4	19.7	22.6	16.5		20.2667	19.6		-0.0697702	0.444462	0.225611		O35215	D-dopachrome decarboxylase	DOPD_MOUSE	Ddt	264814	289850	281401	211995	248813	236835		278688	232548		-0.263313	0.0288563	0.0297066
	ENSMUSG00000037149	DEAD box helicase 1 [Source:MGI Symbol;Acc:MGI:2144727]	Ddx1	147.6	145.9	151.5	147.5	145.8	148.1		148.333	147.133		-0.00537201	0.535173	0.0479765		Q91VR5	ATP-dependent RNA helicase DDX1	DDX1_MOUSE	Ddx1	174178	159320	166032	129163	149563	141298		166510	140008		-0.251755	0.0289226	0.0303656
	ENSMUSG00000053289	DEAD box helicase 10 [Source:MGI Symbol;Acc:MGI:1924841]	Ddx10	158.1	164.8	164.1	152.3	174.3	159.8		162.333	162.133		0.0413945	0.387897	0.34918		Q80Y44	Probable ATP-dependent RNA helicase DDX10	DDX10_MOUSE	Ddx10	21315	18154	16849	13644	16919	16614		18772.7	15725.7		-0.25517	0.0513275	0.104516
	ENSMUSG00000035842	DEAD/H box helicase 11 [Source:MGI Symbol;Acc:MGI:2443590]	Ddx11	15.5	14.5	14.8	14	12.9	12.3		14.9333	13.0667		-0.207695	0.0442626	2.16723		Q6AXC6	ATP-dependent DNA helicase DDX11	DDX11_MOUSE	Ddx11	476	531	353	270	455	358		453.333	361		-0.340185	0.0800502	0.203906
[truncated: 4,861 more rows]
