# Supplementary figures and images for: PIM kinase control of CD8 T cell protein synthesis and cell trafficking
Source: eLife journal article supplement (doi:10.7554/elife.98622), 2024-07-24

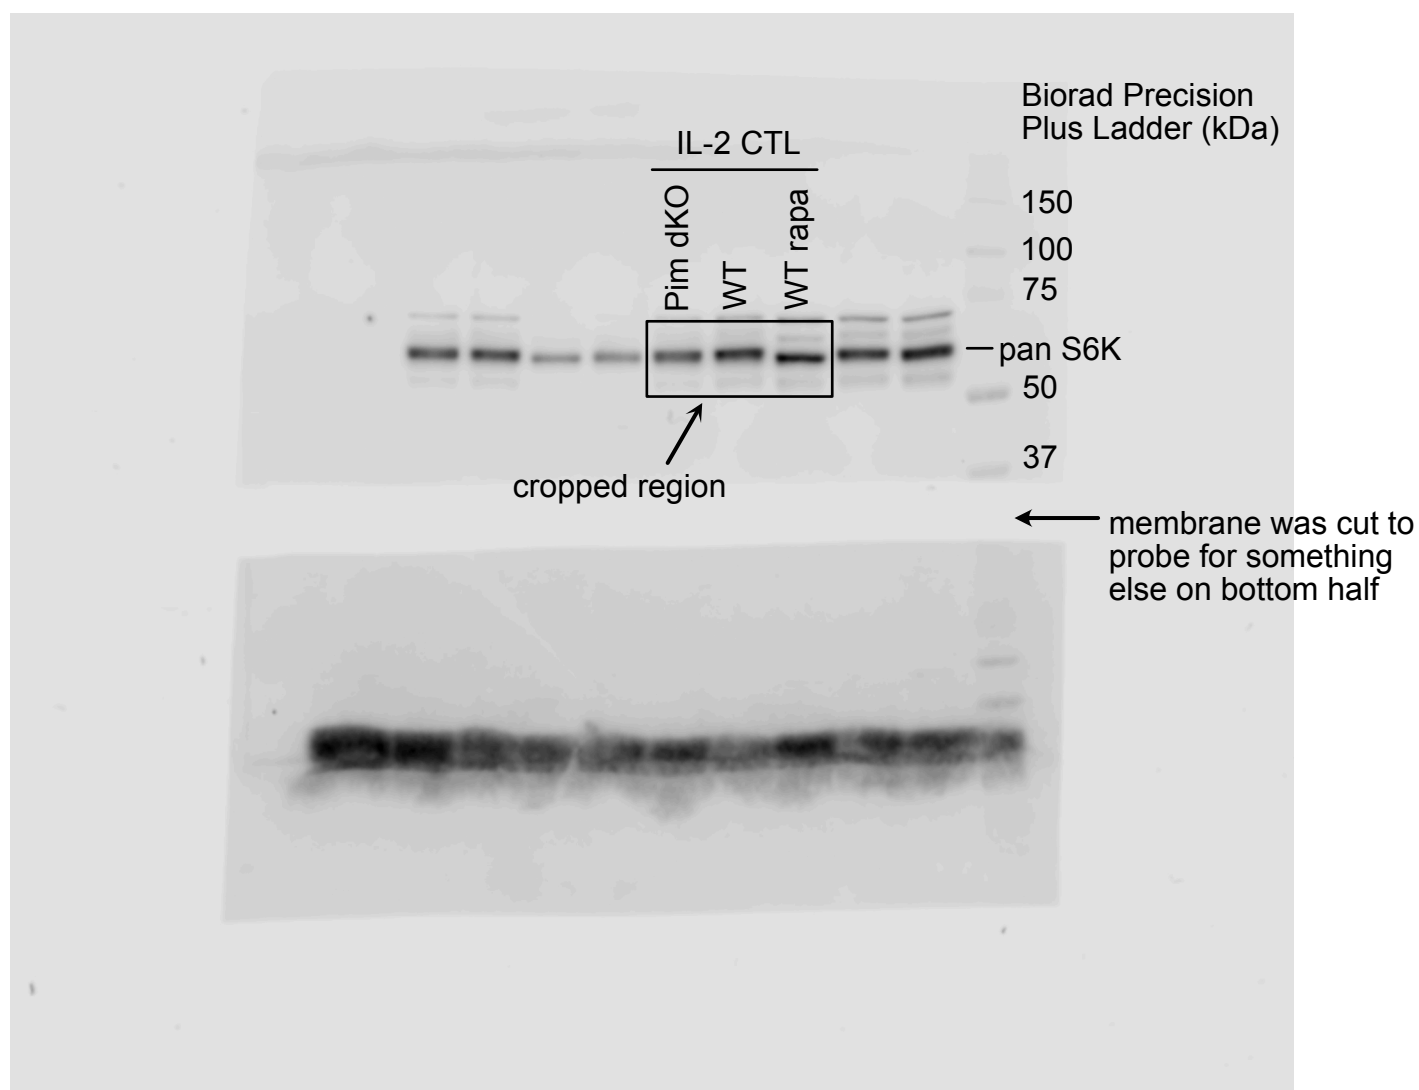

Figure 6 - source data 1

Uncropped and labelled membrane corresponding to Figure 6, panel A, pan S6K

Supplement: fig6-data1 [file elife-98622-fig6-data1-v1.zip]
